# Supplementary material for: Spatial proteomics of ovarian cancer precursors delineates early disease changes and drug targets
Source: Springer Nature journal article supplement (doi:10.1038/s44320-025-00168-4), 2025-11-13
Supplement: MOESM15 [file 44320_2025_168_moesm15_esm.xlsx]

## Sheet: Legend
Dataset EV9. Student's t-test results used for differential abundance analysis of PAX8-positive NFTE and PAX8-negative NFTE samples and visualized in the volcano plot figure EV3F.

## Sheet: Dataset_EV9
Gene	Protein Group	Protein ID	Protein name	First protein description	T-test difference (log2)	T-test statistic	T-test p-value	T-test q-value
TMA7;TMA7B	A0A024R1R8;Q9Y2S6	Q9Y2S6;A0A024R1R8	TMA7B_HUMAN;TMA7_HUMAN	Translation machinery-associated protein 7B	0.116377	0.460023	0.183534	0.751528
NUDT4B	A0A024RBG1	A0A024RBG1	NUD4B_HUMAN	Diphosphoinositol polyphosphate phosphohydrolase NUDT4B	-0.755353	-3.31131	2.10447	0.0176872
IGKV2-28;IGKV2D-28	A0A075B6P5;P01615	A0A075B6P5;P01615	KV228_HUMAN;KVD28_HUMAN	Immunoglobulin kappa variable 2-28	-0.50084	-1.42312	0.732496	0.275905
IGHV3OR16-12	A0A075B7B8	A0A075B7B8	A0A075B7B8_HUMAN	Immunoglobulin heavy variable 3/OR16-12 (non-functional) (Fragment)	-0.640383	-0.809422	0.359411	0.550178
CCDC187	A0A096LP49	A0A096LP49	CC187_HUMAN	Coiled-coil domain-containing protein 187	0.673126	2.54017	1.53233	0.0535718
IGKV3-11;IGKV3D-11	A0A0A0MRZ8;P04433	A0A0A0MRZ8;P04433	KV311_HUMAN;KVD11_HUMAN	Immunoglobulin kappa variable 3D-11	-0.911982	-1.44327	0.745867	0.269266
IGHV3-49	A0A0A0MS15	A0A0B4J1V6;A0A0A0MS15	HV349_HUMAN	Immunoglobulin heavy variable 3-49	-0.976195	-1.3593	0.690554	0.29872
IGHV6-1	A0A0B4J1U7	A0A0B4J1U7	HV601_HUMAN	Immunoglobulin heavy variable 6-1	-0.794017	-1.5853	0.841696	0.221934
IGHV3-74	A0A0B4J1X5	A0A0B4J1X5;A0A075B7E8	HV374_HUMAN	Immunoglobulin heavy variable 3-74	-1.29512	-1.16821	0.568929	0.373041
IGHV3-72	A0A0B4J1Y9	A0A0B4J1Y9	HV372_HUMAN	Immunoglobulin heavy variable 3-72	-1.17269	-1.38193	0.705356	0.290556
GATD3;GATD3B	A0A0B4J2D5;P0DPI2	P0DPI2;A0A0B4J2D5	GAL3A_HUMAN;GAL3B_HUMAN	Putative glutamine amidotransferase-like class 1 domain-containing protein 3B, mitochondrial	-0.305671	-0.97039	0.450093	0.465501
IGHV1-69;IGHV1-69D	A0A0B4J2H0;P01742	P0DP01;P01742;A0A0B4J2H0;P01743;A0A0C4DH29	HV169_HUMAN;HV69D_HUMAN	Immunoglobulin heavy variable 1-69D	-1.19317	-1.41295	0.725772	0.279368
IGKV3D-20	A0A0C4DH25	A0A0C4DH25	KVD20_HUMAN	Immunoglobulin kappa variable 3D-20	-0.834285	-1.7578	0.961412	0.173803
IGHV1-18	A0A0C4DH31	A0A0C4DH31	HV118_HUMAN	Immunoglobulin heavy variable 1-18	0.0632862	0.0632325	0.0218983	0.971925
IGHV5-51	A0A0C4DH38	A0A0C4DH38	HV551_HUMAN	Immunoglobulin heavy variable 5-51	0.230304	0.396829	0.155007	0.788072
IGHV4-30-4;IGHV4-34;IGHV4-38-2;IGHV4-39;IGHV4-59;IGHV4-61	A0A0C4DH41;P01824;P01825;P06331;P0DP06;P0DP08	P0DP06;P0DP08;P01824;P01825;A0A0C4DH41;A0A0J9YWU9;P06331	HV434_HUMAN;HV439_HUMAN;HV459_HUMAN;HV461_HUMAN;HVD34_HUMAN;HVD82_HUMAN	Immunoglobulin heavy variable 4-61	-0.500897	-0.970757	0.450306	0.465351
IGHV3-64D	A0A0J9YX35	A0A0J9YX35	HV64D_HUMAN	Immunoglobulin heavy variable 3-64D	-0.122223	-0.475764	0.190801	0.742381
GNG5;GNG5B	A0A804HLA8;P63218	A0A804HLA8;P63218	GBG5B_HUMAN;GBG5_HUMAN	Guanine nucleotide-binding protein G(I)/G(S)/G(O) subunit gamma-5B	0.154969	0.953896	0.440542	0.475925
RBM47	A0AV96	A0AV96	RBM47_HUMAN	RNA-binding protein 47	-0.837617	-3.70467	2.38966	0.0105532
IFT56	A0AVF1	A0AVF1	IFT56_HUMAN	Intraflagellar transport protein 56	-0.527027	-2.24235	1.3115	0.0829641
UBA6	A0AVT1	A0AVT1	UBA6_HUMAN	Ubiquitin-like modifier-activating enzyme 6	-0.184403	-0.960899	0.44459	0.471388
ESYT2	A0FGR8	A0FGR8	ESYT2_HUMAN	Extended synaptotagmin-2	0.00201313	0.00706887	0.00239568	0.996765
SHTN1	A0MZ66	A0MZ66	SHOT1_HUMAN	Shootin-1	-0.241866	-0.950879	0.438801	0.477576
DAPL1	A0PJW8	A0PJW8	DAPL1_HUMAN	Death-associated protein-like 1	-2.02104	-2.42248	1.44479	0.0632727
CFAP119	A1A4V9	A1A4V9	CF119_HUMAN	Cilia- and flagella-associated protein 119	-0.731883	-1.68013	0.907093	0.194638
ARHGEF37	A1IGU5	A1IGU5	ARH37_HUMAN	Rho guanine nucleotide exchange factor 37	-1.74521	-5.07187	3.3156	0.00257678
MEX3A	A1L020	Q86XN8;Q6ZN04;Q5U5Q3;A1L020	MEX3A_HUMAN	RNA-binding protein MEX3A	1.20655	4.23087	2.75911	0.00569925
ILVBL	A1L0T0	A1L0T0	HACL2_HUMAN	2-hydroxyacyl-CoA lyase 2	0.0676855	0.586693	0.243808	0.678152
PLEKHG3	A1L390	A1L390	PKHG3_HUMAN	Pleckstrin homology domain-containing family G member 3	-0.169488	-0.931242	0.427518	0.487517
SH3PXD2B	A1X283	A1X283	SPD2B_HUMAN	SH3 and PX domain-containing protein 2B	0.522023	4.03333	2.62221	0.00706796
CIBAR1	A1XBS5	A1XBS5	CBAR1_HUMAN	CBY1-interacting BAR domain-containing protein 1	0	NaN	NaN	1
MACROD2	A1Z1Q3	A1Z1Q3	MACD2_HUMAN	ADP-ribose glycohydrolase MACROD2	-1.06091	-2.4969	1.50012	0.0569928
CCDC78	A2IDD5	A2IDD5	CCD78_HUMAN	Coiled-coil domain-containing protein 78	-0.647576	-1.24105	0.61455	0.345018
NBAS	A2RRP1	A2RRP1	NBAS_HUMAN	NBAS subunit of NRZ tethering complex	0.00689276	0.0818423	0.0285446	0.96356
DCDC2B	A2VCK2	A2VCK2	DCD2B_HUMAN	Doublecortin domain-containing protein 2B	-1.15674	-1.99344	1.12963	0.123742
VWA8	A3KMH1	A3KMH1	VWA8_HUMAN	von Willebrand factor A domain-containing protein 8	-0.0996756	-0.31884	0.121244	0.833446
SBNO1	A3KN83	A3KN83	SBNO1_HUMAN	Protein strawberry notch homolog 1	0.380039	3.88888	2.52071	0.00817094
GTPBP10	A4D1E9	A4D1E9	GTPBA_HUMAN	GTP-binding protein 10	0.522072	2.52278	1.51938	0.0547019
WDR91	A4D1P6	A4D1P6	WDR91_HUMAN	WD repeat-containing protein 91	-0.923438	-4.60561	3.01245	0.0039898
DENND11	A4D1U4	A4D1U4	DEN11_HUMAN	DENN domain-containing protein 11	0.929333	3.04329	1.90683	0.0258022
MTMR11	A4FU01	A4FU01	MTMRB_HUMAN	Myotubularin-related protein 11	0.370232	0.606493	0.253596	0.666641
EFCAB5	A4FU69	A4FU69	EFCB5_HUMAN	EF-hand calcium-binding domain-containing protein 5	0.740228	0.812033	0.360836	0.54878
CFAP90	A4QMS7	A4QMS7	CFA90_HUMAN	Cilia- and flagella-associated protein 90	0	NaN	NaN	1
VPS37C	A5D8V6	A5D8V6	VP37C_HUMAN	Vacuolar protein sorting-associated protein 37C	-0.465785	-3.16852	1.99944	0.0216979
ODAD3	A5D8V7	A5D8V7	ODAD3_HUMAN	Outer dynein arm-docking complex subunit 3	-1.21275	-1.70927	0.927399	0.186696
CFAP69	A5D8W1	A5D8W1	CFA69_HUMAN	Cilia- and flagella-associated protein 69	-0.424595	-1.16434	0.566529	0.374571
CNOT1	A5YKK6	A5YKK6	CNOT1_HUMAN	CCR4-NOT transcription complex subunit 1	-0.0210574	-0.441834	0.175216	0.760997
CDHR4	A6H8M9	A6H8M9	CDHR4_HUMAN	Cadherin-related family member 4	-0.493804	-1.52844	0.803007	0.240796
MAP1LC3B;MAP1LC3B2	A6NCE7;Q9GZQ8	Q9GZQ8;A6NCE7	MLP3B_HUMAN;MP3B2_HUMAN	Microtubule-associated proteins 1A/1B light chain 3 beta 2	1.05492	1.00818	0.472189	0.445947
VWA3A	A6NCI4	A6NCI4	VWA3A_HUMAN	von Willebrand factor A domain-containing protein 3A	-0.317907	-0.550582	0.22621	0.699754
PALM3	A6NDB9	A6NDB9	PALM3_HUMAN	Paralemmin-3	-0.400322	-1.0695	0.508668	0.415433
PGP	A6NDG6	A6NDG6	PGP_HUMAN	Glycerol-3-phosphate phosphatase	0.831502	7.03589	4.44874	0.000756757
RIMOC1	A6NDU8	A6NDU8	RIMC1_HUMAN	RAB7A-interacting MON1-CCZ1 complex subunit 1	-0.0204542	-0.0932158	0.0326518	0.957292
EFCAB10	A6NFE3	A6NFE3	EFC10_HUMAN	EF-hand calcium-binding domain-containing protein 10	-0.539884	-0.60857	0.254629	0.665418
CFAP73	A6NFT4	A6NFT4	CFA73_HUMAN	Cilia- and flagella-associated protein 73	-0.0188123	-0.0371619	0.0127417	0.983658
WIPF3	A6NGB9	A6NGB9	WIPF3_HUMAN	WAS/WASL-interacting protein family member 3	0	NaN	NaN	1
GGT1;GGT3P	A6NGU5;P19440	P36268;A6NGU5;P19440	GGT1_HUMAN;GGT3_HUMAN	Putative glutathione hydrolase 3 proenzyme	-2.15615	-3.55313	2.2806	0.0127402
SMCHD1	A6NHR9	A6NHR9	SMHD1_HUMAN	Structural maintenance of chromosomes flexible hinge domain-containing protein 1	0.286719	1.94431	1.09418	0.13313
CCDC69	A6NI79	A6NI79	CCD69_HUMAN	Coiled-coil domain-containing protein 69	0	NaN	NaN	1
UNC119B	A6NIH7	A6NIH7;Q13432	U119B_HUMAN	Protein unc-119 homolog B	-0.457892	-1.6901	0.914029	0.192032
FAM166C	A6NJV1	A6NJV1	F166C_HUMAN	Protein FAM166C	-0.27285	-0.629485	0.265085	0.65398
LIPT2	A6NK58	A6NK58	LIPT2_HUMAN	Putative lipoyltransferase 2, mitochondrial	0.318296	0.617618	0.259139	0.661333
CCDC85C	A6NKD9	A6NKD9	CC85C_HUMAN	Coiled-coil domain-containing protein 85C	-0.163654	-0.377381	0.146438	0.80081
SNTN	A6NMZ2	A6NMZ2	SNTAN_HUMAN	Sentan	-0.991494	-1.48991	0.777031	0.252432
C2orf81	A6NN90	A6NN90	CB081_HUMAN	Uncharacterized protein C2orf81	0	NaN	NaN	1
ENO4	A6NNW6	A6NNW6	ENO4_HUMAN	Enolase 4	0.000556509	0.00221971	0.000750854	0.99825
RIIAD1	A6NNX1	A6NNX1	RIAD1_HUMAN	RIIa domain-containing protein 1	-0.037015	-0.115655	0.0408557	0.946693
LRRIQ3	A6PVS8	A6PVS8	LRIQ3_HUMAN	Leucine-rich repeat and IQ domain-containing protein 3	-0.754576	-1.89125	1.05611	0.143736
C4orf47	A7E2U8	A7E2U8	CD047_HUMAN	UPF0602 protein C4orf47	0.0993729	0.26027	0.0969448	0.868176
ZSWIM8	A7E2V4	A7E2V4	ZSWM8_HUMAN	Zinc finger SWIM domain-containing protein 8	0.448627	0.689012	0.295432	0.61806
ARHGAP32	A7KAX9	A7KAX9	RHG32_HUMAN	Rho GTPase-activating protein 32	-0.899299	-4.80863	3.14611	0.00328916
POM121C	A8CG34	Q96HA1;A8CG34;Q6PJE2	P121C_HUMAN	Nuclear envelope pore membrane protein POM 121C	0.434666	1.91257	1.07138	0.139839
EFCAB7	A8K855	A8K855	EFCB7_HUMAN	EF-hand calcium-binding domain-containing protein 7	-0.469031	-0.698849	0.30053	0.613406
SFI1	A8K8P3	A8K8P3	SFI1_HUMAN	Protein SFI1 homolog	-0.186827	-0.662123	0.281617	0.633776
ZBBX	A8MT70	A8MT70	ZBBX_HUMAN	Zinc finger B-box domain-containing protein 1	0	NaN	NaN	1
FAM166B	A8MTA8	A8MTA8	F166B_HUMAN	Protein FAM166B	-1.3751	-1.92897	1.08315	0.136289
FAM171A2	A8MVW0	A8MVW0	F1712_HUMAN	Protein FAM171A2	0.552391	3.33221	2.11978	0.0171689
SNRPG;SNRPGP15	A8MWD9;P62308	A8MWD9;P62308	RUXGL_HUMAN;RUXG_HUMAN	Putative small nuclear ribonucleoprotein G-like protein 15	0.0399876	0.429712	0.169721	0.768133
NUDT19	A8MXV4	A8MXV4	NUD19_HUMAN	Acyl-coenzyme A diphosphatase NUDT19	0.732984	1.44559	0.747407	0.268448
TTC34	A8MYJ7	A8MYJ7	TTC34_HUMAN	Tetratricopeptide repeat protein 34	0.254181	0.696794	0.299463	0.614184
ODF3B	A8MYP8	A8MYP8	ODF3B_HUMAN	Outer dense fiber protein 3B	-2.58379	-3.29261	2.09075	0.0182164
KPNA7	A9QM74	A9QM74	IMA8_HUMAN	Importin subunit alpha-8	1.30546	4.76116	3.11509	0.00342029
FHAD1	B1AJZ9	B1AJZ9	FHAD1_HUMAN	Forkhead-associated domain-containing protein 1	-0.528644	-0.964513	0.446683	0.469054
ESPN	B1AK53	B1AK53	ESPN_HUMAN	Espin	0.00259034	0.00493107	0.00166978	0.997401
EIF3C;EIF3CL	B5ME19;Q99613	Q99613;B5ME19	EIF3C_HUMAN;EIFCL_HUMAN	Eukaryotic translation initiation factor 3 subunit C-like protein	0.0114718	0.0987025	0.0346454	0.95531
GPR89A;GPR89B	B7ZAQ6;P0CG08	P0CG08;B7ZAQ6	GPHRA_HUMAN;GPHRB_HUMAN	Golgi pH regulator A	0.29132	1.59393	0.847601	0.219327
HNRNPCL1;HNRNPCL3;HNRNPCL4	B7ZW38;O60812;P0DMR1	B7ZW38;O60812;P0DMR1	HNRC1_HUMAN;HNRC3_HUMAN;HNRC4_HUMAN	Heterogeneous nuclear ribonucleoprotein C-like 3	0.00332483	0.00671149	0.00227424	0.996637
WASH2P;WASH3P	C4AMC7;Q6VEQ5	C4AMC7;A8K0Z3;Q6VEQ5;A8MWX3	WASH2_HUMAN;WASH3_HUMAN	Putative WAS protein family homolog 3	-0.477262	-2.90725	1.80581	0.031122
TMEM238	C9JI98	C9JI98	TM238_HUMAN	Transmembrane protein 238	-1.05986	-2.30238	1.35581	0.0756786
MCRIP1	C9JLW8	C9JLW8	MCRI1_HUMAN	Mapk-regulated corepressor-interacting protein 1	0.230044	2.14444	1.23956	0.0965842
KRT15	Cont_O77727	P19012;P13646;Cont_P13646;Cont_P19012;Cont_O77727	K1C15_SHEEP	Keratin, type I cytoskeletal 15	-0.607761	-2.30633	1.35872	0.0752544
KRT14	Cont_P02533;P02533	P02533;Cont_P02533;Cont_Q6IFX2	K1C14_HUMAN	Keratin, type I cytoskeletal 14	1.82377	2.19235	1.27471	0.0891838
KRT6A	Cont_P02538;P02538	P02538;O95678;P48668;Cont_O95678;Cont_P02538;Cont_P48668;Cont_P50446;Cont_Q8BGZ7	K2C6A_HUMAN	Keratin, type II cytoskeletal 6A	0.728808	0.590743	0.245802	0.676227
KRT1	Cont_P04264;P04264	P04264;Cont_P04264	K2C1_HUMAN	Keratin, type II cytoskeletal 1	1.16111	1.26667	0.630817	0.333486
KRT18	Cont_P05783;P05783	P05783;Cont_P05783;Cont_P05784	K1C18_HUMAN	Keratin, type I cytoskeletal 18	-0.659017	-3.72523	2.40437	0.0103371
KRT8	Cont_P05787;P05787	P05787;Cont_P05787	K2C8_HUMAN	Keratin, type II cytoskeletal 8	-0.344616	-1.88311	1.05029	0.145264
KRT19	Cont_P08727;P08727	P08727;Cont_P08727	K1C19_HUMAN	Keratin, type I cytoskeletal 19	-0.663142	-2.79433	1.72174	0.0362583
KRT7	Cont_P08729;P08729	P08729;Cont_P08729	K2C7_HUMAN	Keratin, type II cytoskeletal 7	-1.11154	-4.28733	2.79782	0.00529941
KRT16	Cont_P08779;P08779	P08779;Cont_P08779	K1C16_HUMAN	Keratin, type I cytoskeletal 16	1.09702	0.762998	0.33434	0.575178
KRT10	Cont_P13645;P13645	P13645;Cont_P13645	K1C10_HUMAN	Keratin, type I cytoskeletal 10	0.826612	0.915246	0.418389	0.496154
KRT5	Cont_P13647;P13647	P13647;Cont_P13647;Cont_Q922U2	K2C5_HUMAN	Keratin, type II cytoskeletal 5	1.39451	1.89533	1.05903	0.142949
KRT15	Cont_P19012;P19012	P19012;Q99456;P13646;Cont_P13646;Cont_P19012;Cont_Q99456	K1C15_HUMAN	Keratin, type I cytoskeletal 15	0.312458	0.49558	0.200039	0.731329
KRT4	Cont_P19013;P19013	P19013;Cont_P19013	K2C4_HUMAN	Keratin, type II cytoskeletal 4	1.1351	0.899666	0.40955	0.503361
FLG	Cont_P20930;P20930	P20930;Cont_P20930	FILA_HUMAN	Filaggrin	0.710124	1.11099	0.533772	0.396564
KRT9	Cont_P35527;P35527	P35527;Cont_P35527	K1C9_HUMAN	Keratin, type I cytoskeletal 9	1.4477	1.3522	0.685927	0.301436
KRT2	Cont_P35908;P35908	P35908;Cont_P35908	K22E_HUMAN	Keratin, type II cytoskeletal 2 epidermal	1.12142	1.04353	0.493129	0.428247
ACTB;ACTG1	Cont_P60712;P60709;P63261	P63261;P60709;Cont_P60712	ACTB_BOVIN;ACTB_HUMAN;ACTG_HUMAN	Actin, cytoplasmic 1	0.157082	0.983256	0.457583	0.4586
YWHAZ	Cont_P63103;P63104	P63104;Cont_P63103	1433Z_BOVIN;1433Z_HUMAN	14-3-3 protein zeta/delta	0.188958	1.73346	0.94432	0.180232
EEF1A1;EEF1A1P5	Cont_P68103;P68104;Q5VTE0	P68104;Q5VTE0;Cont_P68103	EF1A1_BOVIN;EF1A1_HUMAN;EF1A3_HUMAN	Elongation factor 1-alpha 1	0.359095	3.07835	1.9328	0.0243314
KRT85	Cont_P78386;P78386	P78386;A6NCN2;P78385;Cont_A6NCN2;Cont_P78385;Cont_P78386;Cont_P02539;Cont_P25691	KRT85_HUMAN	Keratin, type II cuticular Hb5	-1.3607	-5.50909	3.58758	0.0017551
TUBA4A	Cont_P81948;P68366	P68366;P68363;Cont_P81948	TBA4A_BOVIN;TBA4A_HUMAN	Tubulin alpha-4A chain	-0.23353	-1.99939	1.13393	0.122569
KRT17	Cont_Q04695;Q04695	Q04695;Cont_Q04695;Cont_Q9QWL7	K1C17_HUMAN	Keratin, type I cytoskeletal 17	1.68269	2.11234	1.21608	0.102049
KRT32	Cont_Q14532;Q14532	Q14532;Cont_Q14532	K1H2_HUMAN	Keratin, type I cuticular Ha2	-2.21751	-2.66735	1.6271	0.044582
TUBA1D	Cont_Q2HJ86	P68366;P68363;Q9BQE3;Q71U36;A6NHL2;Cont_P81948;Cont_Q2HJ86	TBA1D_BOVIN	Tubulin alpha-1D chain	0.328091	1.52419	0.800133	0.242136
TUBB;TUBB5	Cont_Q2KJD0;P07437	P07437;Cont_Q2KJD0	TBB5_BOVIN;TBB5_HUMAN	Tubulin beta-5 chain	0.918996	5.97436	3.8642	0.0012
FLG2	Cont_Q5D862;Q5D862	Q5D862;Cont_Q5D862	FILA2_HUMAN	Filaggrin-2	0.418741	0.948944	0.437686	0.478697
TPM2	Cont_Q5KR48;P07951	P07951;Cont_Q5KR48	TPM2_BOVIN;TPM2_HUMAN	Tropomyosin beta chain	0.320437	1.64173	0.880489	0.204376
KRT79	Cont_Q5XKE5;Q5XKE5	Q5XKE5;Cont_Q5XKE5;Cont_Q8VED5	K2C79_HUMAN	Keratin, type II cytoskeletal 79	-1.5858	-1.56477	0.827675	0.228644
Krt72	Cont_Q6IME9	Q86Y46;Q3SY84;Q14CN4;Q7RTS7;Cont_Q14CN4;Cont_Q3SY84;Cont_Q7RTS7;Cont_Q86Y46;Cont_Q6IME9	K2C72_MOUSE	Keratin, type II cytoskeletal 72	-1.1078	-4.63012	3.02872	0.00390698
KRT80	Cont_Q6KB66;Q6KB66	Q6KB66;Cont_Q6KB66	K2C80_HUMAN	Keratin, type II cytoskeletal 80	0.737933	1.41056	0.724194	0.280102
KRT77	Cont_Q7Z794;Q7Z794	Q7Z794;Cont_Q7Z794	K2C1B_HUMAN	Keratin, type II cytoskeletal 1b	-0.679172	-1.20248	0.590273	0.358801
HRNR	Cont_Q86YZ3;Q86YZ3	Q86YZ3;Cont_Q86YZ3	HORN_HUMAN	Hornerin	0.232907	0.317989	0.120884	0.833923
KRT78	Cont_Q8N1N4;Q8N1N4	Q8N1N4;Cont_Q8N1N4	K2C78_HUMAN	Keratin, type II cytoskeletal 78	0.872696	1.592	0.846282	0.219774
KRT23	Cont_Q9C075;Q9C075	Q9C075;Cont_Q9C075;Cont_Q99PS0	K1C23_HUMAN	Keratin, type I cytoskeletal 23	1.7847	2.95914	1.84439	0.0290037
Krt7	Cont_Q9DCV7	O95678;Cont_O95678;Cont_Q9DCV7	K2C7_MOUSE	Keratin, type II cytoskeletal 7	-0.138359	-0.207676	0.0759017	0.897332
KRT84	Cont_Q9NSB2;Q9NSB2	Q01546;Q9NSB2;Cont_Q01546;Cont_Q9NSB2	KRT84_HUMAN	Keratin, type II cuticular Hb4	1.23929	1.16369	0.566129	0.3749
CFAP99	D6REC4	D6REC4	CFA99_HUMAN	Cilia- and flagella-associated protein 99	0	NaN	NaN	1
ANKRD65	E5RJM6	E5RJM6	ANR65_HUMAN	Ankyrin repeat domain-containing protein 65	-1.77664	-3.81434	2.46789	0.00912973
NACA	E9PAV3	E9PAV3	NACAM_HUMAN	Nascent polypeptide-associated complex subunit alpha, muscle-specific form	-0.0832709	-0.701221	0.301762	0.612039
C11orf98	E9PRG8	E9PRG8	CK098_HUMAN	Uncharacterized protein C11orf98	-0.022095	-0.0774196	0.0269567	0.965568
STMND1	H3BQB6	H3BQB6	STMD1_HUMAN	Stathmin domain-containing protein 1	0.0798286	0.211585	0.0774404	0.895215
CROCC2	H7BZ55	H7BZ55	CRCC2_HUMAN	Ciliary rootlet coiled-coil protein 2	1.16939	2.17523	1.26213	0.0919499
DCDC1	M0R2J8	M0R2J8	DCDC1_HUMAN	Doublecortin domain-containing protein 1	-3.03438	-5.51253	3.58968	0.0017641
DNASE2	O00115	O00115	DNS2A_HUMAN	Deoxyribonuclease-2-alpha	0.735506	2.56463	1.55054	0.052021
AGPS	O00116	O00116	ADAS_HUMAN	Alkyldihydroxyacetonephosphate synthase, peroxisomal	0.314832	1.92182	1.07802	0.137945
KIF2A	O00139	O00139	KIF2A_HUMAN	Kinesin-like protein KIF2A	0.114431	0.849448	0.381424	0.528455
TK2	O00142	O00142	KITM_HUMAN	Thymidine kinase 2, mitochondrial	-1.217	-1.70045	0.92124	0.18904
DDX39A	O00148	O00148	DX39A_HUMAN	ATP-dependent RNA helicase DDX39A	1.70293	5.8155	3.77121	0.0012549
PDLIM1	O00151	O00151	PDLI1_HUMAN	PDZ and LIM domain protein 1	0.152284	0.535168	0.218798	0.708431
ACOT7	O00154	O00154	BACH_HUMAN	Cytosolic acyl coenzyme A thioester hydrolase	1.13261	2.79913	1.72532	0.0359893
MYO1C	O00159	O00159	MYO1C_HUMAN	Unconventional myosin-Ic	-0.511557	-3.30156	2.09733	0.018
MYO1F	O00160	O00160	MYO1F_HUMAN	Unconventional myosin-If	-0.509297	-1.09106	0.521671	0.405586
SNAP23	O00161	O00161	SNP23_HUMAN	Synaptosomal-associated protein 23	-0.194618	-1.28671	0.643622	0.326012
HAX1	O00165	O00165	HAX1_HUMAN	HCLS1-associated protein X-1	0.372102	1.55843	0.823362	0.230747
FXYD1	O00168	O00168	PLM_HUMAN	Phospholemman	-2.02279	-2.76274	1.6982	0.0381597
AIP	O00170	O00170	AIP_HUMAN	AH receptor-interacting protein	0.17089	1.68275	0.908919	0.194167
GTPBP1	O00178	O00178	GTPB1_HUMAN	GTP-binding protein 1	-0.651034	-4.42948	2.89444	0.0048125
LGALS9	O00182	O00182	LEG9_HUMAN	Galectin-9	-0.804147	-3.25685	2.06449	0.0189853
STXBP3	O00186	O00186	STXB3_HUMAN	Syntaxin-binding protein 3	-0.474788	-4.26393	2.78179	0.00545665
ARVCF	O00192	O00192	ARVC_HUMAN	Splicing regulator ARVCF	0.42057	1.13939	0.55114	0.385416
SMAP	O00193	O00193	SMAP_HUMAN	Small acidic protein	0.181806	0.700258	0.301262	0.612386
RAB27B	O00194	O00194	RB27B_HUMAN	Ras-related protein Rab-27B	-1.37889	-4.10524	2.6723	0.00644595
AP3B1	O00203	Q13367;O00203	AP3B1_HUMAN	AP-3 complex subunit beta-1	-0.434086	-5.84632	3.78937	0.00119205
APBB1	O00213	O00213	APBB1_HUMAN	Amyloid beta precursor protein binding family B member 1	-1.02826	-3.31533	2.10742	0.0175575
LGALS8	O00214	O00214	LEG8_HUMAN	Galectin-8	-0.798781	-2.27561	1.33603	0.0787682
NDUFS8	O00217	O00217	NDUS8_HUMAN	NADH dehydrogenase [ubiquinone] iron-sulfur protein 8, mitochondrial	-0.327711	-1.18636	0.580206	0.3648
NFKBIE	O00221	O00221	IKBE_HUMAN	NF-kappa-B inhibitor epsilon	-0.968709	-2.21936	1.29457	0.0857861
PSMD11	O00231	O00231	PSD11_HUMAN	26S proteasome non-ATPase regulatory subunit 11	-0.0843586	-1.27508	0.636185	0.330577
PSMD12	O00232	O00232	PSD12_HUMAN	26S proteasome non-ATPase regulatory subunit 12	-0.0662428	-1.05146	0.49786	0.423849
PSMD9	O00233	O00233	PSMD9_HUMAN	26S proteasome non-ATPase regulatory subunit 9	0.101014	0.783824	0.345525	0.563971
ATOX1	O00244	O00244	ATOX1_HUMAN	Copper transport protein ATOX1	-0.211567	-0.843302	0.37802	0.53131
MEN1	O00255	O00255	MEN1_HUMAN	Menin	-0.0876914	-1.22428	0.603963	0.351117
PGRMC1	O00264	O00264	PGRC1_HUMAN	Membrane-associated progesterone receptor component 1	-0.607046	-3.14626	1.98301	0.022102
SUPT5H	O00267	O00267	SPT5H_HUMAN	Transcription elongation factor SPT5	0.427651	2.45644	1.47003	0.0601795
TAF4	O00268	O00268	TAF4_HUMAN	Transcription initiation factor TFIID subunit 4	0.182458	1.18843	0.581497	0.363962
DFFA	O00273	O00273	DFFA_HUMAN	DNA fragmentation factor subunit alpha	-0.016261	-0.079115	0.0275648	0.964815
RFXAP	O00287	O00287	RFXAP_HUMAN	Regulatory factor X-associated protein	-0.0960799	-0.190496	0.0691874	0.906841
HIP1	O00291	O00291	HIP1_HUMAN	Huntingtin-interacting protein 1	0.464718	2.40494	1.43177	0.0648404
CLIC1	O00299	O00299	CLIC1_HUMAN	Chloride intracellular channel protein 1	0.363594	1.94061	1.09152	0.133965
EIF3F	O00303	O00303	EIF3F_HUMAN	Eukaryotic translation initiation factor 3 subunit F	0.0134669	0.125127	0.0443591	0.941502
WWP2	O00308	O00308	WWP2_HUMAN	NEDD4-like E3 ubiquitin-protein ligase WWP2	-0.278649	-0.468346	0.187368	0.746197
PDHX	O00330	O00330	ODPX_HUMAN	Pyruvate dehydrogenase protein X component, mitochondrial	0.504623	2.22373	1.29778	0.0852394
MATN2	O00339	O00339	MATN2_HUMAN	Matrilin-2	-0.833224	-1.37334	0.699725	0.293921
QSOX1	O00391	O00391	QSOX1_HUMAN	Sulfhydryl oxidase 1	0.147315	1.22005	0.601304	0.352227
SLC33A1	O00400	O00400	ACATN_HUMAN	Acetyl-coenzyme A transporter 1	0.0432087	0.17997	0.0651124	0.912418
WASL	O00401	O00401	WASL_HUMAN	Actin nucleation-promoting factor WASL	-0.142322	-0.73928	0.321726	0.588672
IPO5	O00410	O00410	IPO5_HUMAN	Importin-5	0.240358	1.72057	0.935298	0.183677
EEF2K	O00418	O00418	EF2K_HUMAN	Eukaryotic elongation factor 2 kinase	-0.314911	-1.0996	0.526843	0.402203
SAP18	O00422	O00422	SAP18_HUMAN	Histone deacetylase complex subunit SAP18	0.276243	2.24042	1.31008	0.0831206
EML1	O00423	O00423	EMAL1_HUMAN	Echinoderm microtubule-associated protein-like 1	-0.932096	-2.42897	1.44962	0.0628217
DNM1L	O00429	O00429	DNM1L_HUMAN	Dynamin-1-like protein	0.237682	1.0445	0.493705	0.427679
RTCA	O00442	O00442	RTCA_HUMAN	RNA 3'-terminal phosphate cyclase	0.316308	2.53613	1.52932	0.053824
PIK3C2A	O00443	O00443	P3C2A_HUMAN	Phosphatidylinositol 4-phosphate 3-kinase C2 domain-containing subunit alpha	-0.0662971	-0.488117	0.196548	0.735457
IFRD1	O00458	O00458	IFRD1_HUMAN	Interferon-related developmental regulator 1	0.197639	0.380527	0.147817	0.798961
PIK3R2	O00459	O00459	P85B_HUMAN	Phosphatidylinositol 3-kinase regulatory subunit beta	1.04629	2.36118	1.39932	0.0691906
AGRN	O00468	O00468	AGRIN_HUMAN	Agrin	-0.546333	-3.04636	1.90911	0.0256576
PLOD2	O00469	O00469	PLOD2_HUMAN	Procollagen-lysine,2-oxoglutarate 5-dioxygenase 2	1.03264	3.32396	2.11374	0.0173397
MEIS1;MEIS2	O00470;O14770	O00470;A6NDR6;Q99687;O14770;A8K0S8	MEIS1_HUMAN;MEIS2_HUMAN	Homeobox protein Meis1	0.165405	0.651014	0.27596	0.641049
EXOC5	O00471	O00471	EXOC5_HUMAN	Exocyst complex component 5	-0.0961926	-0.775026	0.340788	0.56927
BTN3A3	O00478	P78410;O00481;O00478	BT3A3_HUMAN	Butyrophilin subfamily 3 member A3	-0.568122	-1.96016	1.1056	0.130468
HMGN4	O00479	O00479	HMGN4_HUMAN	High mobility group nucleosome-binding domain-containing protein 4	-0.605865	-3.51446	2.2526	0.0132899
NDUFA4	O00483	O00483	NDUA4_HUMAN	Cytochrome c oxidase subunit NDUFA4	-0.675445	-2.6708	1.62967	0.0444723
PSMD14	O00487	O00487	PSDE_HUMAN	26S proteasome non-ATPase regulatory subunit 14	-0.0493545	-0.825118	0.368	0.542029
BIN1	O00499	O00499	BIN1_HUMAN	Myc box-dependent-interacting protein 1	-0.634019	-4.26584	2.7831	0.00543629
KPNA3	O00505	O00505	IMA4_HUMAN	Importin subunit alpha-4	0.326114	1.43902	0.743039	0.270772
STK25	O00506	O00506	STK25_HUMAN	Serine/threonine-protein kinase 25	0.126588	0.525382	0.214123	0.714137
BCL9	O00512	O00512	BCL9_HUMAN	B-cell CLL/lymphoma 9 protein	1.23648	2.82841	1.74713	0.0346329
LAD1	O00515	O00515	LAD1_HUMAN	Ladinin-1	0.2473	0.66259	0.281855	0.633602
FAAH	O00519	O00519	FAAH1_HUMAN	Fatty-acid amide hydrolase 1	-1.54823	-5.71073	3.70906	0.00149398
KRIT1	O00522	O00522	KRIT1_HUMAN	Krev interaction trapped protein 1	0.143912	0.542178	0.222161	0.704117
CHL1	O00533	O00533	NCHL1_HUMAN	Neural cell adhesion molecule L1-like protein	0.712025	1.65399	0.888963	0.20106
VWA5A	O00534	O00534	VMA5A_HUMAN	von Willebrand factor A domain-containing protein 5A	-0.730455	-2.11255	1.21623	0.102052
PES1	O00541	O00541	PESC_HUMAN	Pescadillo homolog	0.330408	1.18681	0.580485	0.364631
EBAG9	O00559	O00559	RCAS1_HUMAN	Receptor-binding cancer antigen expressed on SiSo cells	0.197496	1.07114	0.509649	0.414648
SDCBP	O00560	O00560	SDCB1_HUMAN	Syntenin-1	-0.0353466	-0.118112	0.0417623	0.945085
PITPNM1	O00562	O00562	PITM1_HUMAN	Membrane-associated phosphatidylinositol transfer protein 1	0.116177	0.493988	0.199293	0.732222
MPHOSPH10	O00566	O00566	MPP10_HUMAN	U3 small nucleolar ribonucleoprotein protein MPP10	0.0163518	0.0965533	0.0338635	0.956095
NOP56	O00567	O00567	NOP56_HUMAN	Nucleolar protein 56	-0.227944	-0.827989	0.369577	0.540927
DDX3X	O00571	O15523;O00571	DDX3X_HUMAN	ATP-dependent RNA helicase DDX3X	0.260413	1.61296	0.860658	0.213261
RNASET2	O00584	O00584	RNT2_HUMAN	Ribonuclease T2	-0.58088	-1.08989	0.520959	0.405897
PODXL	O00592	O00592	PODXL_HUMAN	Podocalyxin	0.139157	0.362787	0.140073	0.808087
PIR	O00625	O00625	PIR_HUMAN	Pirin	-0.74096	-2.3579	1.39689	0.069521
KPNA4	O00629	O00629	IMA3_HUMAN	Importin subunit alpha-3	0.445585	4.29824	2.80527	0.00528854
TRIM38	O00635	O00635	TRI38_HUMAN	E3 ubiquitin-protein ligase TRIM38	-0.0559291	-0.341606	0.130934	0.821316
NFIB	O00712	O00712	NFIB_HUMAN	Nuclear factor 1 B-type	0.294063	0.825755	0.36835	0.541885
PPP6C	O00743	O00743	PPP6_HUMAN	Serine/threonine-protein phosphatase 6 catalytic subunit	-0.415903	-2.76037	1.69644	0.0382376
CES2	O00748	O00748	EST2_HUMAN	Cocaine esterase	-1.25813	-3.99835	2.59773	0.00739432
MAN2B1	O00754	O00754	MA2B1_HUMAN	Lysosomal alpha-mannosidase	0.423916	1.97655	1.11742	0.127367
UBE2C	O00762	O00762	UBE2C_HUMAN	Ubiquitin-conjugating enzyme E2 C	2.40072	7.59343	4.73193	0.000296296
PDXK	O00764	O00764	PDXK_HUMAN	Pyridoxal kinase	-0.819495	-3.3679	2.1459	0.0163423
DLGAP1	O14490	O14490	DLGP1_HUMAN	Disks large-associated protein 1	-0.990626	-5.00237	3.27127	0.00277465
ARID1A	O14497	O14497	ARI1A_HUMAN	AT-rich interactive domain-containing protein 1A	0.31576	2.3395	1.38326	0.0715272
C2CD2L	O14523	O14523	C2C2L_HUMAN	Phospholipid transfer protein C2CD2L	0.342577	1.13139	0.546232	0.388738
NEMP1	O14524	O14524	NEMP1_HUMAN	Nuclear envelope integral membrane protein 1	0.0670935	0.400632	0.156695	0.785895
TXNDC9	O14530	O14530	TXND9_HUMAN	Thioredoxin domain-containing protein 9	0.405888	1.26033	0.626787	0.336301
DPYSL4	O14531	O14531	DPYL4_HUMAN	Dihydropyrimidinase-related protein 4	-0.327217	-0.535887	0.219142	0.708041
TRAFD1	O14545	O14545	TRAD1_HUMAN	TRAF-type zinc finger domain-containing protein 1	0.171009	1.14053	0.551842	0.384984
COX7A2L	O14548	O14548	COX7R_HUMAN	Cytochrome c oxidase subunit 7A-related protein, mitochondrial	-0.439689	-1.14258	0.553101	0.384285
HSPB6	O14558	O14558	HSPB6_HUMAN	Heat shock protein beta-6	-0.935713	-1.97133	1.11365	0.128562
NDUFAB1	O14561	O14561	ACPM_HUMAN	Acyl carrier protein, mitochondrial	-0.0533996	-0.209771	0.0767257	0.896287
UBFD1	O14562	O14562	UBFD1_HUMAN	Ubiquitin domain-containing protein UBFD1	0.1589	0.802706	0.355754	0.553896
CIT	O14578	O14578	CTRO_HUMAN	Citron Rho-interacting kinase	2.00094	17.7521	8.16359	0
COPE	O14579	O14579	COPE_HUMAN	Coatomer subunit epsilon	-0.105704	-1.07403	0.511392	0.413154
EIF1AX;EIF1AY	O14602;P47813	O14602;P47813	IF1AX_HUMAN;IF1AY_HUMAN	Eukaryotic translation initiation factor 1A, Y-chromosomal	-0.69276	-4.52398	2.95799	0.00439518
KDM6A;UTY	O14607;O15550	O14607;O15550	KDM6A_HUMAN;UTY_HUMAN	Histone demethylase UTY	0.020473	0.185739	0.0673422	0.9085
AP3D1	O14617	O14617	AP3D1_HUMAN	AP-3 complex subunit delta-1	-0.402067	-6.4586	4.13859	0.000692308
CCS	O14618	O14618	CCS_HUMAN	Copper chaperone for superoxide dismutase	-1.65584	-2.62343	1.59436	0.0478814
ABLIM1	O14639	O14639	ABLM1_HUMAN	Actin-binding LIM protein 1	-0.555463	-2.62493	1.59547	0.0478351
DVL1;DVL1P1	O14640;P54792	P54792;O14640	DVL1_HUMAN;DVLP1_HUMAN	Segment polarity protein dishevelled homolog DVL-1	-0.156281	-0.54624	0.224116	0.701561
DNALI1	O14645	O14645	IDLC_HUMAN	Axonemal dynein light intermediate polypeptide 1	-1.5884	-2.40799	1.43404	0.0644832
CHD2	O14647	Q8TD26;Q9HCK8;Q3L8U1;O14647;Q9P2D1;O14646	CHD2_HUMAN	Chromodomain-helicase-DNA-binding protein 2	-0.134127	-1.53988	0.810754	0.237035
GOSR2	O14653	O14653	GOSR2_HUMAN	Golgi SNAP receptor complex member 2	0.223401	0.960839	0.444556	0.471321
TOR1A	O14656	O14656	TOR1A_HUMAN	Torsin-1A	-0.355148	-2.22666	1.29994	0.0849012
TOR1B	O14657	O14657	TOR1B_HUMAN	Torsin-1B	-0.219128	-1.07949	0.514677	0.410847
STX16	O14662	O14662	STX16_HUMAN	Syntaxin-16	0.407636	2.03434	1.15927	0.115467
ADAM10	O14672	O14672	ADA10_HUMAN	Disintegrin and metalloproteinase domain-containing protein 10	-1.13913	-5.27477	3.44329	0.0022931
ABCD4	O14678	O14678	ABCD4_HUMAN	Lysosomal cobalamin transporter ABCD4	-0.600421	-1.82103	1.00608	0.158746
KMT2D	O14686	O14686	KMT2D_HUMAN	Histone-lysine N-methyltransferase 2D	0.0235635	0.178892	0.0646967	0.913082
APAF1	O14727	O14727	APAF_HUMAN	Apoptotic protease-activating factor 1	-0.127229	-0.907043	0.413728	0.499274
MAP2K7	O14733	O14733	MP2K7_HUMAN	Dual specificity mitogen-activated protein kinase kinase 7	-0.263995	-2.03943	1.16296	0.114574
ACOT8	O14734	O14734	ACOT8_HUMAN	Acyl-coenzyme A thioesterase 8	0.784073	5.65835	3.67774	0.00154913
CDIPT	O14735	O14735	CDIPT_HUMAN	CDP-diacylglycerol--inositol 3-phosphatidyltransferase	-0.271152	-1.51712	0.795351	0.244262
PDCD5	O14737	O14737	PDCD5_HUMAN	Programmed cell death protein 5	0.188591	1.14315	0.553452	0.384083
PRMT5	O14744	O14744	ANM5_HUMAN	Protein arginine N-methyltransferase 5	-0.589903	-3.63603	2.3404	0.0114007
NHERF1	O14745	O14745	NHRF1_HUMAN	Na(+)/H(+) exchange regulatory cofactor NHE-RF1	-0.777822	-4.03849	2.62581	0.00704052
FPGT	O14772	O14772	FPGT_HUMAN	Fucose-1-phosphate guanylyltransferase	0.0983828	0.41835	0.164605	0.775224
TPP1	O14773	O14773	TPP1_HUMAN	Tripeptidyl-peptidase 1	-0.435174	-1.40187	0.718458	0.283011
TCERG1	O14776	O14776	TCRG1_HUMAN	Transcription elongation regulator 1	0.150172	1.29408	0.648349	0.323638
NDC80	O14777	O14777	NDC80_HUMAN	Kinetochore protein NDC80 homolog	0.793505	1.87692	1.04586	0.146665
NRP1	O14786	O14786	NRP1_HUMAN	Neuropilin-1	-0.710006	-2.95495	1.84127	0.0291646
TNPO2	O14787	O14787	TNPO2_HUMAN	Transportin-2	-0.099683	-0.29663	0.111923	0.846374
POLR3A	O14802	O14802	RPC1_HUMAN	DNA-directed RNA polymerase III subunit RPC1	-0.268652	-0.618971	0.259815	0.661042
PSMA7	O14818	O14818	PSA7_HUMAN	Proteasome subunit alpha type-7	-0.265771	-4.18516	2.72762	0.00582406
SCAMP3	O14828	O14828	SCAM3_HUMAN	Secretory carrier-associated membrane protein 3	0.55187	3.09832	1.94758	0.0236217
OPLAH	O14841	O14841	OPLA_HUMAN	5-oxoprolinase	0.132759	0.216767	0.0794861	0.891873
BCKDK	O14874	O14874	BCKD_HUMAN	[3-methyl-2-oxobutanoate dehydrogenase [lipoamide]] kinase, mitochondrial	-0.05703	-0.281242	0.105541	0.855745
IFIT3	O14879	O14879	IFIT3_HUMAN	Interferon-induced protein with tetratricopeptide repeats 3	-0.740004	-0.99759	0.465968	0.451546
MGST3	O14880	O14880	MGST3_HUMAN	Glutathione S-transferase 3, mitochondrial	0.557181	2.88228	1.78723	0.0323642
GEMIN2	O14893	O14893	GEMI2_HUMAN	Gem-associated protein 2	0.620451	2.29117	1.34752	0.0767409
IRF6	O14896	O14896	IRF6_HUMAN	Interferon regulatory factor 6	0.0578031	0.145175	0.0518526	0.930501
TAX1BP3	O14907	O14907	TX1B3_HUMAN	Tax1-binding protein 3	-0.222474	-0.919421	0.420766	0.494425
GIPC1	O14908	Q8TF64;O14908	GIPC1_HUMAN	PDZ domain-containing protein GIPC1	0.659065	3.85225	2.49479	0.00867778
IKBKB	O14920	O14920	IKKB_HUMAN	Inhibitor of nuclear factor kappa-B kinase subunit beta	0.135218	1.11552	0.536532	0.395669
RGS12	O14924	O14924	RGS12_HUMAN	Regulator of G-protein signaling 12	-0.155556	-0.503643	0.203828	0.726778
TIMM23	O14925	O14925;Q5SRD1	TIM23_HUMAN	Mitochondrial import inner membrane translocase subunit Tim23	1.08932	5.43363	3.54149	0.00203922
HAT1	O14929	O14929	HAT1_HUMAN	Histone acetyltransferase type B catalytic subunit	1.2868	4.07623	2.65212	0.00676364
UBE2L6	O14933	O14933	UB2L6_HUMAN	Ubiquitin/ISG15-conjugating enzyme E2 L6	0.00260234	0.0092845	0.00314927	0.996219
CASK	O14936	O14936	CSKP_HUMAN	Peripheral plasma membrane protein CASK	-0.906725	-3.1553	1.98969	0.0220431
PLD2	O14939	O14939	PLD2_HUMAN	Phospholipase D2	-0.935485	-2.81583	1.73776	0.0350256
UQCRQ	O14949	O14949	QCR8_HUMAN	Cytochrome b-c1 complex subunit 8	-0.378797	-1.46982	0.763569	0.25957
MYL12A;MYL12B	O14950;P19105	P19105;O14950	ML12A_HUMAN;ML12B_HUMAN	Myosin regulatory light chain 12B	-0.255774	-1.65054	0.886574	0.20217
HGS	O14964	O14964	HGS_HUMAN	Hepatocyte growth factor-regulated tyrosine kinase substrate	-0.129097	-1.9366	1.08864	0.134716
CLGN	O14967	O14967	CLGN_HUMAN	Calmegin	0.448964	1.04599	0.494589	0.426992
VPS26C	O14972	O14972	VP26C_HUMAN	Vacuolar protein sorting-associated protein 26C	-0.214319	-1.27099	0.633574	0.331918
PPP1R12A	O14974	O14974	MYPT1_HUMAN	Protein phosphatase 1 regulatory subunit 12A	0.273273	1.7756	0.973948	0.169404
SLC27A2	O14975	O14975	S27A2_HUMAN	Long-chain fatty acid transport protein 2	-1.84038	-3.98941	2.59147	0.00741066
GAK	O14976	O14976	GAK_HUMAN	Cyclin-G-associated kinase	0.332426	0.795981	0.352101	0.557664
HNRNPDL	O14979	O14979	HNRDL_HUMAN	Heterogeneous nuclear ribonucleoprotein D-like	-0.401296	-1.58092	0.838697	0.223314
XPO1	O14980	O14980	XPO1_HUMAN	Exportin-1	0.364791	4.48652	2.93286	0.00450704
BTAF1	O14981	O14981	BTAF1_HUMAN	TATA-binding protein-associated factor 172	0.450406	4.12558	2.68642	0.00635897
SPTBN2	O15020	O15020	SPTN2_HUMAN	Spectrin beta chain, non-erythrocytic 2	-0.0942024	-0.401425	0.157047	0.78575
MAST4	O15021	O15021	MAST4_HUMAN	Microtubule-associated serine/threonine-protein kinase 4	-1.25136	-3.15666	1.99069	0.0220034
SEC16A	O15027	O15027	SC16A_HUMAN	Protein transport protein Sec16A	-0.300286	-1.80763	0.99658	0.161989
PLXNB2	O15031	O15031	PLXB2_HUMAN	Plexin-B2	-0.670995	-5.16912	3.37712	0.00239676
U2SURP	O15042	O15042	SR140_HUMAN	U2 snRNP-associated SURP motif-containing protein	0.379109	3.98814	2.59058	0.00738222
SETD1A	O15047	O15047	SET1A_HUMAN	Histone-lysine N-methyltransferase SETD1A	-0.176268	-2.02335	1.15129	0.117766
SYNJ2	O15056	O15056	SYNJ2_HUMAN	Synaptojanin-2	-0.254406	-1.38815	0.709436	0.288016
SYNM	O15061	O15061	SYNEM_HUMAN	Synemin	-0.938548	-1.70239	0.922595	0.188558
KIF3B	O15066	O15066	KIF3B_HUMAN	Kinesin-like protein KIF3B	0.0348229	0.156706	0.0562111	0.923836
PFAS	O15067	O15067	PUR4_HUMAN	Phosphoribosylformylglycinamidine synthase	-0.990433	-4.09489	2.6651	0.00652101
DCLK1	O15075	O15075	DCLK1_HUMAN	Serine/threonine-protein kinase DCLK1	0.820211	1.42182	0.731638	0.276236
CEP290	O15078	O15078	CE290_HUMAN	Centrosomal protein of 290 kDa	-0.582035	-1.70303	0.923045	0.188489
ANKRD28	O15084	Q8N8A2;O15084	ANR28_HUMAN	Serine/threonine-protein phosphatase 6 regulatory ankyrin repeat subunit A	0.000751734	0.00741853	0.00251452	0.996767
ARHGEF11	O15085	O15085	ARHGB_HUMAN	Rho guanine nucleotide exchange factor 11	0.204235	0.996692	0.465441	0.452163
PRORP	O15091	O15091	MRPP3_HUMAN	Mitochondrial ribonuclease P catalytic subunit	0.532854	2.00015	1.13448	0.122428
LSM1	O15116	O15116	LSM1_HUMAN	U6 snRNA-associated Sm-like protein LSm1	0.171681	0.678547	0.290034	0.623654
NPC1	O15118	O15118	NPC1_HUMAN	NPC intracellular cholesterol transporter 1	1.13799	2.36807	1.40443	0.0684945
DEGS1	O15121	O15121	DEGS1_HUMAN	Sphingolipid delta(4)-desaturase DES1	0.00855994	0.020695	0.00705076	0.990713
SCAMP1	O15126	O15126	SCAM1_HUMAN	Secretory carrier-associated membrane protein 1	-0.262399	-1.62283	0.867448	0.21013
SCAMP2	O15127	O15127	SCAM2_HUMAN	Secretory carrier-associated membrane protein 2	-0.313108	-2.12232	1.22337	0.100561
ARPC1B	O15143	O15143	ARC1B_HUMAN	Actin-related protein 2/3 complex subunit 1B	0.495538	2.73774	1.67957	0.0398297
ARPC2	O15144	O15144	ARPC2_HUMAN	Actin-related protein 2/3 complex subunit 2	0.0300685	0.222205	0.0816409	0.889323
ARPC3	O15145	O15145	ARPC3_HUMAN	Actin-related protein 2/3 complex subunit 3	0.0307033	0.224584	0.0825861	0.887899
BET1	O15155	O15155	BET1_HUMAN	BET1 homolog	0.0875636	0.44026	0.174501	0.761978
POLR1C	O15160	O15160	RPAC1_HUMAN	DNA-directed RNA polymerases I and III subunit RPAC1	0.0105422	0.0583492	0.0201695	0.974581
TRIM24	O15164	O15164	TIF1A_HUMAN	Transcription intermediary factor 1-alpha	0.419953	4.1339	2.69218	0.00620926
PGRMC2	O15173	O15173	PGRC2_HUMAN	Membrane-associated progesterone receptor component 2	-0.763631	-4.07919	2.65419	0.00668657
CETN3	O15182	O15182	CETN3_HUMAN	Centrin-3	-0.665405	-3.9173	2.54076	0.00795328
VILL	O15195	O15195	VILL_HUMAN	Villin-like protein	0.149313	0.298648	0.112764	0.845574
RGL2	O15211	O15211	RGL2_HUMAN	Ral guanine nucleotide dissociation stimulator-like 2	0.831195	1.46927	0.763202	0.25978
PFDN6	O15212	O15212	PFD6_HUMAN	Prefoldin subunit 6	0.269136	2.87065	1.77858	0.0328942
WDR46	O15213	O15213	WDR46_HUMAN	WD repeat-containing protein 46	0.167945	0.667573	0.284403	0.630328
NKRF	O15226	O15226	NKRF_HUMAN	NF-kappa-B-repressing factor	0.375665	1.80532	0.994941	0.1625
GNPAT	O15228	O15228	GNPAT_HUMAN	Dihydroxyacetone phosphate acyltransferase	-0.045862	-0.0818622	0.0285517	0.963698
LAMA5	O15230	O15230	LAMA5_HUMAN	Laminin subunit alpha-5	-0.566199	-2.42365	1.44567	0.0632377
ZNF185	O15231	O15231	ZN185_HUMAN	Zinc finger protein 185	-0.569954	-3.09922	1.94825	0.0236082
CASC3	O15234	O15234	CASC3_HUMAN	Protein CASC3	0.109353	1.23996	0.613862	0.345309
MRPS12	O15235	O15235	RT12_HUMAN	Small ribosomal subunit protein uS12m	0.295714	1.93966	1.09084	0.134106
ACOX3	O15254	O15254	ACOX3_HUMAN	Peroxisomal acyl-coenzyme A oxidase 3	-0.350764	-1.09971	0.52691	0.40222
RER1	O15258	O15258	RER1_HUMAN	Protein RER1	0.331444	2.79562	1.7227	0.0362053
NPHP1	O15259	O15259	NPHP1_HUMAN	Nephrocystin-1	-0.794538	-1.34301	0.679947	0.304943
MAPK13	O15264	O15264	MK13_HUMAN	Mitogen-activated protein kinase 13	-0.133483	-0.68113	0.291364	0.622399
SPTLC1	O15269	O15269	SPTC1_HUMAN	Serine palmitoyltransferase 1	-0.125695	-0.938118	0.43146	0.484412
SPTLC2	O15270	O15270	SPTC2_HUMAN	Serine palmitoyltransferase 2	0.214389	0.907837	0.414179	0.499262
OGT	O15294	O15294	OGT1_HUMAN	UDP-N-acetylglucosamine--peptide N-acetylglucosaminyltransferase 110 kDa subunit	0.0943798	1.41326	0.725979	0.279425
PMM2	O15305	O15305	PMM2_HUMAN	Phosphomannomutase 2	-0.145244	-0.814364	0.36211	0.547783
TM9SF1	O15321	O15321	TM9S1_HUMAN	Transmembrane 9 superfamily member 1	-0.0759164	-0.285561	0.107326	0.853196
INPP4B	O15327	O15327	INP4B_HUMAN	Inositol polyphosphate 4-phosphatase type II	-0.685057	-1.62258	0.867278	0.210156
MID1	O15344	O15344	TRI18_HUMAN	E3 ubiquitin-protein ligase Midline-1	0.0297821	0.155121	0.0556101	0.924574
HMGB3	O15347	O15347	HMGB3_HUMAN	High mobility group protein B3	0.458783	3.42916	2.1906	0.015051
PPM1G	O15355	O15355	PPM1G_HUMAN	Protein phosphatase 1G	0.754313	5.98923	3.87283	0.00120863
INPPL1	O15357	O15357	SHIP2_HUMAN	Phosphatidylinositol 3,4,5-trisphosphate 5-phosphatase 2	0.126701	1.63443	0.875445	0.206315
EIF3D	O15371	O15371	EIF3D_HUMAN	Eukaryotic translation initiation factor 3 subunit D	-0.010075	-0.0822357	0.0286861	0.963548
EIF3H	O15372	O15372	EIF3H_HUMAN	Eukaryotic translation initiation factor 3 subunit H	0.0233009	0.1976	0.0719541	0.902503
HDAC3	O15379	O15379	HDAC3_HUMAN	Histone deacetylase 3	-0.118973	-0.735693	0.31983	0.59117
NVL	O15381	O15381	NVL_HUMAN	Nuclear valosin-containing protein-like	0.818412	4.17646	2.72162	0.00582531
BCAT2	O15382	O15382	BCAT2_HUMAN	Branched-chain-amino-acid aminotransferase, mitochondrial	-0.220948	-1.04878	0.496259	0.425349
IPO8	O15397	O15397	IPO8_HUMAN	Importin-8	0.627822	4.46334	2.91727	0.0046
STX7	O15400	O15400	STX7_HUMAN	Syntaxin-7	0.0401142	0.311741	0.11825	0.837823
TNRC18	O15417	O15417	TNC18_HUMAN	Trinucleotide repeat-containing gene 18 protein	-0.228785	-1.50224	0.785323	0.249121
ABCC4	O15439	O15439	MRP4_HUMAN	ATP-binding cassette sub-family C member 4	-0.28106	-0.826079	0.368528	0.541748
POLR1G	O15446	O15446	RPA34_HUMAN	DNA-directed RNA polymerase I subunit RPA34	-0.140157	-0.461846	0.184372	0.750381
TLR3	O15455	O15455	TLR3_HUMAN	Toll-like receptor 3	-1.60591	-3.37935	2.15426	0.0161818
P4HA2	O15460	O15460	P4HA2_HUMAN	Prolyl 4-hydroxylase subunit alpha-2	0.668232	1.94909	1.09762	0.132116
CAPN5	O15484	O15484	CAN5_HUMAN	Calpain-5	-0.458958	-1.2985	0.651185	0.321813
YKT6	O15498	O15498	YKT6_HUMAN	Synaptobrevin homolog YKT6	0.533013	2.62347	1.59439	0.0479055
NUP42	O15504	O15504	NUP42_HUMAN	Nucleoporin NUP42	0.130645	1.11515	0.536303	0.395742
ARPC5	O15511	O15511	ARPC5_HUMAN	Actin-related protein 2/3 complex subunit 5	0.232122	1.26998	0.632933	0.332498
PDPK1	O15530	Q6A1A2;O15530	PDPK1_HUMAN	3-phosphoinositide-dependent protein kinase 1	-0.531129	-2.53602	1.52923	0.0538138
TAPBP	O15533	O15533	TPSN_HUMAN	Tapasin	0.388017	1.50393	0.786459	0.248744
CLDN3	O15551	P56747;O14493;O15551;O95484	CLD3_HUMAN	Claudin-3	1.17754	4.69981	3.07478	0.00372452
DHX15	O43143	O43143	DHX15_HUMAN	ATP-dependent RNA helicase DHX15	0.0861388	0.424738	0.167477	0.771089
RNMT	O43148	O43148	MCES_HUMAN	mRNA cap guanine-N7 methyltransferase	0.46552	4.28074	2.7933	0.00534369
ZZEF1	O43149	O43149	ZZEF1_HUMAN	Zinc finger ZZ-type and EF-hand domain-containing protein 1	-0.641055	-2.39847	1.42697	0.0654846
ASAP2	O43150	O43150	ASAP2_HUMAN	Arf-GAP with SH3 domain, ANK repeat and PH domain-containing protein 2	-0.331282	-1.80279	0.993153	0.163205
TTI1	O43156	O43156	TTI1_HUMAN	TELO2-interacting protein 1 homolog	0.996375	1.23086	0.608114	0.348692
PLXNB1	O43157	O43157	PLXB1_HUMAN	Plexin-B1	-0.613033	-1.45636	0.75458	0.264623
RRP8	O43159	O43159	RRP8_HUMAN	Ribosomal RNA-processing protein 8	-0.42658	-2.81526	1.73734	0.0350452
SIPA1L1	O43166	O43166	SI1L1_HUMAN	Signal-induced proliferation-associated 1-like protein 1	-0.424037	-0.815537	0.362751	0.546984
CYB5B	O43169	O43169	CYB5B_HUMAN	Cytochrome b5 type B	-0.218549	-1.01665	0.477185	0.440955
PRPF4	O43172	O43172	PRP4_HUMAN	U4/U6 small nuclear ribonucleoprotein Prp4	0.208629	2.21308	1.28995	0.0866594
PHGDH	O43175	O43175	SERA_HUMAN	D-3-phosphoglycerate dehydrogenase	-0.781626	-2.0047	1.13778	0.121603
NDUFS4	O43181	O43181	NDUS4_HUMAN	NADH dehydrogenase [ubiquinone] iron-sulfur protein 4, mitochondrial	-0.877405	-2.21269	1.28966	0.0866569
ARHGAP6	O43182	O43182	RHG06_HUMAN	Rho GTPase-activating protein 6	-1.1195	-1.50012	0.783893	0.249498
PHF1	O43189	O43189	PHF1_HUMAN	PHD finger protein 1	-0.348641	-1.18875	0.581699	0.363828
GPR39	O43194	O43194	GPR39_HUMAN	G-protein coupled receptor 39	-0.376476	-0.878997	0.397906	0.513641
DYNC1LI2	O43237	O43237	DC1L2_HUMAN	Cytoplasmic dynein 1 light intermediate chain 2	-0.499142	-3.40834	2.17543	0.0155026
KLK10	O43240	O43240	KLK10_HUMAN	Kallikrein-10	0.564031	1.10708	0.531389	0.398494
PSMD3	O43242	O43242	PSMD3_HUMAN	26S proteasome non-ATPase regulatory subunit 3	-0.107429	-1.73896	0.948175	0.17894
RBFOX2	O43251	O43251	RFOX2_HUMAN	RNA binding protein fox-1 homolog 2	-0.0773591	-0.629355	0.265019	0.653948
PAPSS1	O43252	O43252	PAPS1_HUMAN	Bifunctional 3'-phosphoadenosine 5'-phosphosulfate synthase 1	-0.0531485	-0.325461	0.124048	0.829805
ZW10	O43264	O43264	ZW10_HUMAN	Centromere/kinetochore protein zw10 homolog	0.0963949	0.969741	0.449716	0.465855
PRODH	O43272	O43272	PROD_HUMAN	Proline dehydrogenase 1, mitochondrial	0.0036219	0.00668202	0.00226423	0.996507
SPINT1	O43278	O43278	SPIT1_HUMAN	Kunitz-type protease inhibitor 1	0.916495	9.53732	5.61091	0.000285714
B4GALT5	O43286	O43286	B4GT5_HUMAN	Beta-1,4-galactosyltransferase 5	0.251764	0.922159	0.422328	0.493054
SART1	O43290	O43290	SNUT1_HUMAN	U4/U6.U5 tri-snRNP-associated protein 1	0.135705	2.54072	1.53273	0.0536246
SPINT2	O43291	O43291	SPIT2_HUMAN	Kunitz-type protease inhibitor 2	1.4819	3.83142	2.48002	0.00884384
GPAA1	O43292	O43292	GPAA1_HUMAN	Glycosylphosphatidylinositol anchor attachment 1 protein	0.230907	1.21372	0.597324	0.35501
DAPK3	O43293	O43293	DAPK3_HUMAN	Death-associated protein kinase 3	1.14226	2.08062	1.19293	0.107184
TGFB1I1	O43294	O43294	TGFI1_HUMAN	Transforming growth factor beta-1-induced transcript 1 protein	-0.712325	-1.78436	0.980124	0.167834
SRGAP3	O43295	O43295	SRGP3_HUMAN	SLIT-ROBO Rho GTPase-activating protein 3	-0.338816	-1.7913	0.985025	0.166191
AP5Z1	O43299	O43299	AP5Z1_HUMAN	AP-5 complex subunit zeta-1	0.0342322	0.20411	0.0745016	0.898948
HSPA12A	O43301	O43301	HS12A_HUMAN	Heat shock 70 kDa protein 12A	-0.984848	-3.21033	2.03027	0.0202872
CCP110	O43303	O43303	CP110_HUMAN	Centriolar coiled-coil protein of 110 kDa	-0.275997	-0.513105	0.208294	0.72094
PPIP5K2	O43314	O43314	VIP2_HUMAN	Inositol hexakisphosphate and diphosphoinositol-pentakisphosphate kinase 2	-0.113783	-0.742263	0.323305	0.587564
MAP3K7	O43318	O43318	M3K7_HUMAN	Mitogen-activated protein kinase kinase kinase 7	0.0626482	0.363497	0.140381	0.808008
EEF1E1	O43324	O43324	MCA3_HUMAN	Eukaryotic translation elongation factor 1 epsilon-1	0.340058	2.61841	1.59061	0.048123
MSI1	O43347	O43347	MSI1H_HUMAN	RNA-binding protein Musashi homolog 1	1.38444	2.28934	1.34616	0.0768693
HNRNPR	O43390	O43390	HNRPR_HUMAN	Heterogeneous nuclear ribonucleoprotein R	-0.0467897	-0.386148	0.150289	0.795227
PRPF3	O43395	O43395	PRPF3_HUMAN	U4/U6 small nuclear ribonucleoprotein Prp3	0.214678	3.16184	1.99451	0.0218392
TXNL1	O43396	O43396	TXNL1_HUMAN	Thioredoxin-like protein 1	-0.293563	-1.80149	0.992233	0.163563
TPD52L2	O43399	O43399	TPD54_HUMAN	Tumor protein D54	0.0857305	0.445285	0.176788	0.758885
EMC8	O43402	O43402	EMC8_HUMAN	ER membrane protein complex subunit 8	-0.01867	-0.297946	0.112471	0.845654
ERI3	O43414	O43414	ERI3_HUMAN	ERI1 exoribonuclease 3	-0.309266	-1.28785	0.644351	0.32559
THAP12	O43422	O43422	P52K_HUMAN	52 kDa repressor of the inhibitor of the protein kinase	0.514861	2.76616	1.70075	0.037937
FIBP	O43427	O43427	FIBP_HUMAN	Acidic fibroblast growth factor intracellular-binding protein	-0.491251	-7.21929	4.5436	0.000727273
EIF4G3	O43432	O43432	IF4G3_HUMAN	Eukaryotic translation initiation factor 4 gamma 3	0.183823	2.68014	1.63663	0.04377
PPIH	O43447	O43447	PPIH_HUMAN	Peptidyl-prolyl cis-trans isomerase H	0.104494	0.891359	0.404859	0.50746
HTRA2	O43464	O43464;P83110	HTRA2_HUMAN	Serine protease HTRA2, mitochondrial	0.283358	1.90804	1.06813	0.140591
AKR7A2	O43488	O43488	ARK72_HUMAN	Aflatoxin B1 aldehyde reductase member 2	-0.950679	-5.38057	3.50886	0.00213084
EPB41L2	O43491	O43491	E41L2_HUMAN	Band 4.1-like protein 2	-0.600528	-1.96924	1.11215	0.12885
TGOLN2	O43493	O43493	TGON2_HUMAN	Trans-Golgi network integral membrane protein 2	-0.0367291	-0.208129	0.0760797	0.897134
B4GAT1	O43505	O43505	B4GA1_HUMAN	Beta-1,4-glucuronyltransferase 1	-0.369497	-1.34229	0.67948	0.305131
WIPF1	O43516	O43516	WIPF1_HUMAN	WAS/WASL-interacting protein family member 1	-0.729999	-1.29988	0.652077	0.321367
ATP8B1	O43520	O43520	AT8B1_HUMAN	Phospholipid-transporting ATPase IC	-1.97309	-3.56968	2.29256	0.0124249
BCL2L11	O43521	O43521	B2L11_HUMAN	Bcl-2-like protein 11	1.49708	3.54235	2.2728	0.0129579
FOXO3	O43524	O43524	FOXO3_HUMAN	Forkhead box protein O3	-0.24969	-0.712889	0.307846	0.604971
RGS14	O43566	O43566	RGS14_HUMAN	Regulator of G-protein signaling 14	-0.773051	-2.31471	1.36492	0.074334
AKAP10	O43572	O43572	AKA10_HUMAN	A-kinase anchor protein 10, mitochondrial	-0.299913	-1.89667	1.05999	0.142774
DENR	O43583	O43583	DENR_HUMAN	Density-regulated protein	0.0218033	0.173166	0.0624941	0.915824
XPOT	O43592	O43592	XPOT_HUMAN	Exportin-T	0.684875	8.67314	5.2393	0.000173913
DNPH1	O43598	O43598	DNPH1_HUMAN	2'-deoxynucleoside 5'-phosphate N-hydrolase 1	-0.571606	-1.89219	1.05678	0.14371
TIMM44	O43615	O43615	TIM44_HUMAN	Mitochondrial import inner membrane translocase subunit TIM44	0.609665	2.70829	1.65762	0.0419732
TRAPPC3	O43617	O43617	TPPC3_HUMAN	Trafficking protein particle complex subunit 3	0.200705	1.70917	0.927328	0.186611
CHMP2A	O43633	O43633	CHM2A_HUMAN	Charged multivesicular body protein 2a	-0.188526	-0.640477	0.270623	0.647432
NCK2	O43639	O43639	NCK2_HUMAN	Cytoplasmic protein NCK2	-0.171072	-0.742752	0.323564	0.587288
PLRG1	O43660	O43660	PLRG1_HUMAN	Pleiotropic regulator 1	0.123496	1.39938	0.716823	0.283685
PRC1	O43663	O43663	PRC1_HUMAN	Protein regulator of cytokinesis 1	1.16715	4.00056	2.59928	0.00736177
RGS10	O43665	O43665	RGS10_HUMAN	Regulator of G-protein signaling 10	0.132223	0.208873	0.0763721	0.896646
ZNF207	O43670	O43670	ZN207_HUMAN	BUB3-interacting and GLEBS motif-containing protein ZNF207	0.0269961	0.270883	0.10128	0.862377
NDUFB5	O43674	O43674	NDUB5_HUMAN	NADH dehydrogenase [ubiquinone] 1 beta subcomplex subunit 5, mitochondrial	-0.473195	-1.5759	0.835271	0.225093
NDUFB3	O43676	O43676	NDUB3_HUMAN	NADH dehydrogenase [ubiquinone] 1 beta subcomplex subunit 3	-0.0709598	-0.6329	0.266802	0.651976
NDUFA2	O43678	O43678	NDUA2_HUMAN	NADH dehydrogenase [ubiquinone] 1 alpha subcomplex subunit 2	-0.744965	-2.55568	1.54388	0.052546
GET3	O43681	O43681	GET3_HUMAN	ATPase GET3	0.49001	3.6691	2.36416	0.0110758
BUB3	O43684	O43684	BUB3_HUMAN	Mitotic checkpoint protein BUB3	0.0158823	0.171811	0.0619741	0.916561
PLPP2	O43688	O43688	PLPP2_HUMAN	Phospholipid phosphatase 2	0.232249	0.408017	0.159982	0.781819
ACTN4	O43707	O43707	ACTN4_HUMAN	Alpha-actinin-4	-0.0124571	-0.0558214	0.019277	0.97557
GSTZ1	O43708	O43708	MAAI_HUMAN	Maleylacetoacetate isomerase	-0.550301	-3.35413	2.13583	0.0167762
BUD23	O43709	O43709	BUD23_HUMAN	Probable 18S rRNA (guanine-N(7))-methyltransferase	0.317646	1.72705	0.939832	0.182127
GATC	O43716	O43716	GATC_HUMAN	Glutamyl-tRNA(Gln) amidotransferase subunit C, mitochondrial	0.779327	2.38805	1.41924	0.066387
HTATSF1	O43719	O43719	HTSF1_HUMAN	HIV Tat-specific factor 1	-0.291327	-2.29858	1.353	0.0760154
AP1G1	O43747	O43747	AP1G1_HUMAN	AP-1 complex subunit gamma-1	-0.191015	-1.39473	0.713759	0.285639
STX6	O43752	O43752	STX6_HUMAN	Syntaxin-6	0.456363	2.1049	1.21065	0.103172
SYNGR2	O43760	O43760	SNG2_HUMAN	Synaptogyrin-2	-0.0654679	-0.311254	0.118046	0.837978
SGTA	O43765	O43765	SGTA_HUMAN	Small glutamine-rich tetratricopeptide repeat-containing protein alpha	-0.185342	-1.81475	1.00162	0.160103
ENSA	O43768	O43768;P56211	ENSA_HUMAN	Alpha-endosulfine	-0.0134261	-0.0813124	0.0283541	0.963681
SLC25A20	O43772	O43772	MCAT_HUMAN	Mitochondrial carnitine/acylcarnitine carrier protein	-0.367136	-2.44774	1.46356	0.0609262
NARS1	O43776	O43776	SYNC_HUMAN	Asparagine--tRNA ligase, cytoplasmic	-0.134416	-0.839642	0.375998	0.533507
MYO1B	O43795	O43795	MYO1B_HUMAN	Unconventional myosin-Ib	0.248001	0.615042	0.257853	0.661769
SSNA1	O43805	O43805	SSNA1_HUMAN	Microtubule nucleation factor SSNA1	0.154229	0.362847	0.140099	0.808183
NUDT21	O43809	O43809	CPSF5_HUMAN	Cleavage and polyadenylation specificity factor subunit 5	0.145777	1.14498	0.55458	0.383309
LANCL1	O43813	O43813	LANC1_HUMAN	Glutathione S-transferase LANCL1	-0.465997	-2.26099	1.32524	0.0807338
STRN	O43815	O43815	STRN_HUMAN	Striatin	-0.0968533	-0.773241	0.339829	0.570135
RRP9	O43818	O43818	U3IP2_HUMAN	U3 small nucleolar RNA-interacting protein 2	0.201737	0.924764	0.423815	0.491418
SCO2	O43819	O43819	SCO2_HUMAN	Protein SCO2 homolog, mitochondrial	0.0716155	0.159196	0.057157	0.9225
CFAP410	O43822	O43822	CF410_HUMAN	Cilia- and flagella-associated protein 410	0.297117	1.14143	0.552397	0.384622
AKAP8	O43823	O43823	AKAP8_HUMAN	A-kinase anchor protein 8	0.566744	3.8157	2.46886	0.00912347
GTPBP6	O43824	O43824	GTPB6_HUMAN	Putative GTP-binding protein 6	-0.0806338	-0.246125	0.0912127	0.875024
IDH3B	O43837	O43837	IDH3B_HUMAN	Isocitrate dehydrogenase [NAD] subunit beta, mitochondrial	0.0931378	0.506577	0.20521	0.725217
NRDC	O43847	O43847	NRDC_HUMAN	Nardilysin	0.476443	3.28381	2.0843	0.0182698
CALU	O43852	O43852	CALU_HUMAN	Calumenin	0.357337	1.18468	0.57916	0.365358
AHCYL1	O43865	O43865	SAHH2_HUMAN	S-adenosylhomocysteine hydrolase-like protein 1	-0.921103	-5.17343	3.37984	0.00241633
KIF1C	O43896	O43896	KIF1C_HUMAN	Kinesin-like protein KIF1C	-0.602194	-1.33974	0.677827	0.306274
ORC5	O43913	O43913	ORC5_HUMAN	Origin recognition complex subunit 5	0.323613	2.80669	1.73095	0.035589
NDUFS5	O43920	O43920	NDUS5_HUMAN	NADH dehydrogenase [ubiquinone] iron-sulfur protein 5	-0.593264	-1.90353	1.0649	0.141673
PDE6D	O43924	O43924	PDE6D_HUMAN	Retinal rod rhodopsin-sensitive cGMP 3',5'-cyclic phosphodiesterase subunit delta	-0.190337	-1.07426	0.511532	0.413062
ORC4	O43929	O43929	ORC4_HUMAN	Origin recognition complex subunit 4	0.146152	3.47567	2.22444	0.0139446
PEX1	O43933	O43933	PEX1_HUMAN	Peroxisomal ATPase PEX1	0.238275	2.40717	1.43343	0.0645694
RAD21	O60216	O60216	RAD21_HUMAN	Double-strand-break repair protein rad21 homolog	-0.01223	-0.0933339	0.0326946	0.957332
AKR1B10	O60218	O60218	AK1BA_HUMAN	Aldo-keto reductase family 1 member B10	0.602099	1.7007	0.921418	0.189019
TIMM8A	O60220	O60220	TIM8A_HUMAN	Mitochondrial import inner membrane translocase subunit Tim8 A	0.133911	0.555202	0.228443	0.696849
KALRN	O60229	O60229	KALRN_HUMAN	Kalirin	0.0135977	0.0250819	0.00855989	0.988287
DHX16	O60231	O60231	DHX16_HUMAN	Pre-mRNA-splicing factor ATP-dependent RNA helicase DHX16	0.724478	11.6593	6.41698	0
ZNRD2	O60232	O60232	ZNRD2_HUMAN	Protein ZNRD2	0.484733	1.828	1.01102	0.157304
GMFG	O60234	O60234	GMFG_HUMAN	Glia maturation factor gamma	0.0994275	0.180438	0.0652929	0.912141
HS6ST1	O60243	O60243	H6ST1_HUMAN	Heparan-sulfate 6-O-sulfotransferase 1	0.704128	1.80629	0.995627	0.16238
MED14	O60244	O60244	MED14_HUMAN	Mediator of RNA polymerase II transcription subunit 14	0.290339	4.23551	2.76229	0.0057197
PCDH7	O60245	O60245	PCDH7_HUMAN	Protocadherin-7	0.441136	1.08097	0.515572	0.410266
PRPSAP2	O60256	O60256	KPRB_HUMAN	Phosphoribosyl pyrophosphate synthase-associated protein 2	-1.22597	-9.35494	5.53482	0.000235294
GNG7	O60262	O60262	GBG7_HUMAN	Guanine nucleotide-binding protein G(I)/G(S)/G(O) subunit gamma-7	-0.710511	-1.71171	0.929102	0.186144
SMARCA5	O60264	O60264;P28370	SMCA5_HUMAN	SWI/SNF-related matrix-associated actin-dependent regulator of chromatin subfamily A member 5	0.393839	5.03885	3.29458	0.00257875
SPAG9	O60271	O60271;Q9UPT6	JIP4_HUMAN	C-Jun-amino-terminal kinase-interacting protein 4	-0.277993	-2.48912	1.49433	0.0575784
KIF5C	O60282	O60282	KIF5C_HUMAN	Kinesin heavy chain isoform 5C	1.46427	3.65531	2.35426	0.0112397
URB1	O60287	O60287	NPA1P_HUMAN	Nucleolar pre-ribosomal-associated protein 1	0.00155918	0.00885632	0.00300354	0.996152
SIPA1L3	O60292	O60292	SI1L3_HUMAN	Signal-induced proliferation-associated 1-like protein 3	-0.130808	-0.250919	0.0931496	0.872512
LZTS3	O60299	O60299	LZTS3_HUMAN	Leucine zipper putative tumor suppressor 3	0.0891166	0.471334	0.188749	0.744566
KATNIP	O60303	O60303	KATIP_HUMAN	Katanin-interacting protein	0.199002	0.540488	0.221349	0.705239
AQR	O60306	O60306	AQR_HUMAN	RNA helicase aquarius	0.131958	1.2875	0.644132	0.325698
OPA1	O60313	O60313	OPA1_HUMAN	Dynamin-like 120 kDa protein, mitochondrial	0.364142	1.67206	0.901489	0.196441
MCM3AP	O60318	O60318	GANP_HUMAN	Germinal-center associated nuclear protein	0.117373	1.83533	1.01623	0.155482
KIF1B	O60333	O60333	KIF1B_HUMAN	Kinesin-like protein KIF1B	0.924705	2.33827	1.38236	0.0717014
KDM1A	O60341	O60341	KDM1A_HUMAN	Lysine-specific histone demethylase 1A	0.182227	1.76254	0.964747	0.172444
TBC1D4	O60343	O60343	TBCD4_HUMAN	TBC1 domain family member 4	-0.214391	-0.432682	0.171064	0.766328
FZD6	O60353	O60353	FZD6_HUMAN	Frizzled-6	-0.591141	-1.85448	1.02985	0.151245
PPL	O60437	O60437	PEPL_HUMAN	Periplakin	-0.914913	-2.69052	1.64436	0.0431064
GSDME	O60443	O60443	GSDME_HUMAN	Gasdermin-E	-0.590263	-1.82445	1.0085	0.157881
LY75	O60449	O60449	LY75_HUMAN	Lymphocyte antigen 75	-1.44142	-5.29792	3.4577	0.00227313
MAN1A2	O60476	O60476	MA1A2_HUMAN	Mannosyl-oligosaccharide 1,2-alpha-mannosidase IB	0.1728	1.60958	0.858341	0.214419
ACSL4	O60488	O60488	ACSL4_HUMAN	Long-chain-fatty-acid--CoA ligase 4	0.0817423	0.258365	0.0961697	0.869017
SNX3	O60493	O60493	SNX3_HUMAN	Sorting nexin-3	0.256496	1.50892	0.789823	0.246996
OGA	O60502	O60502	OGA_HUMAN	Protein O-GlcNAcase	-0.101856	-0.5234	0.21318	0.71482
SORBS3	O60504	O60504	VINEX_HUMAN	Vinexin	-1.02057	-2.14057	1.23673	0.0973732
SYNCRIP	O60506	O60506	HNRPQ_HUMAN	Heterogeneous nuclear ribonucleoprotein Q	0.471429	3.45962	2.21278	0.0143609
CDC40	O60508	O60508	PRP17_HUMAN	Pre-mRNA-processing factor 17	0.0534551	0.2724	0.101902	0.86123
RANBP6	O60518	O60518	RNBP6_HUMAN	Ran-binding protein 6	0.122847	0.572547	0.236875	0.68564
NEMF	O60524	O60524	NEMF_HUMAN	Ribosome quality control complex subunit NEMF	-0.0266087	-0.167151	0.0601899	0.91819
GMDS	O60547	O60547	GMDS_HUMAN	GDP-mannose 4,6 dehydratase	-0.244389	-0.975451	0.453035	0.462976
NMT2	O60551	O60551	NMT2_HUMAN	Glycylpeptide N-tetradecanoyltransferase 2	-0.358297	-1.38857	0.709711	0.288044
CCNT1	O60563	O60563	CCNT1_HUMAN	Cyclin-T1	0.538658	1.39772	0.715727	0.284405
BUB1B	O60566	O60566	BUB1B_HUMAN	Mitotic checkpoint serine/threonine-protein kinase BUB1 beta	0.205228	0.348009	0.133685	0.81766
PLOD3	O60568	O60568	PLOD3_HUMAN	Multifunctional procollagen lysine hydroxylase and glycosyltransferase LH3	0.720481	3.23119	2.04562	0.0197081
EIF4E2	O60573	O60573	IF4E2_HUMAN	Eukaryotic translation initiation factor 4E type 2	0.375172	4.96719	3.24872	0.0029863
DIAPH1	O60610	O60610	DIAP1_HUMAN	Protein diaphanous homolog 1	0.237182	1.11116	0.53387	0.396747
SELENOF	O60613	O60613	SEP15_HUMAN	Selenoprotein F	-0.0129848	-0.119863	0.042409	0.944583
TSPAN1	O60635	O60635	TSN1_HUMAN	Tetraspanin-1	-0.592732	-0.850672	0.382103	0.528105
TSPAN3	O60637	O60637	TSN3_HUMAN	Tetraspanin-3	-1.36401	-1.78392	0.979815	0.167931
EXOC3	O60645	O60645	EXOC3_HUMAN	Exocyst complex component 3	-0.0784217	-1.60071	0.852247	0.217351
PLIN3	O60664	O60664	PLIN3_HUMAN	Perilipin-3	-0.854644	-2.60199	1.57838	0.0492872
PRMT3	O60678	O60678	ANM3_HUMAN	Protein arginine N-methyltransferase 3	-0.637007	-1.53787	0.809396	0.237574
KPNA6	O60684	O60684	IMA7_HUMAN	Importin subunit alpha-7	0.320759	3.07949	1.93365	0.0242699
UGDH	O60701	O60701	UGDH_HUMAN	UDP-glucose 6-dehydrogenase	-0.704237	-1.47903	0.769737	0.256016
CTNND1	O60716	O60716	CTND1_HUMAN	Catenin delta-1	-0.43552	-2.74731	1.6867	0.0392
EIF1B	O60739	O60739;P41567	EIF1B_HUMAN	Eukaryotic translation initiation factor 1b	0.00593336	0.0438903	0.0150877	0.980147
SNX2	O60749	Q13596;O60749	SNX2_HUMAN	Sorting nexin-2	-0.338535	-2.04823	1.16936	0.113039
DPM1	O60762	O60762	DPM1_HUMAN	Dolichol-phosphate mannosyltransferase subunit 1	-0.649878	-6.77277	4.30959	0.000740741
USO1	O60763	O60763	USO1_HUMAN	General vesicular transport factor p115	-0.129718	-0.735201	0.31957	0.591375
MRPS14	O60783	O60783	RT14_HUMAN	Small ribosomal subunit protein uS14m	0.153141	0.985765	0.459047	0.457154
TOM1	O60784	O60784	TOM1_HUMAN	Target of Myb1 membrane trafficking protein	-0.72079	-3.33095	2.11886	0.0171589
H2BC10;H2BC12;H2BC14;H2BC15;H2BC18;H2BC5;H2BC9	O60814;P58876;P62807;Q5QNW6;Q93079;Q99877;Q99879	Q99879;P57053;Q5QNW6;Q16778;O60814;P62807;P23527;P06899;Q99880;Q99877;P33778;Q93079;P58876	H2B1C_HUMAN;H2B1D_HUMAN;H2B1H_HUMAN;H2B1K_HUMAN;H2B1M_HUMAN;H2B1N_HUMAN;H2B2F_HUMAN	Histone H2B type 1-K	-0.208513	-1.50082	0.784364	0.249466
PFKFB2	O60825	O60825;Q16875	F262_HUMAN	6-phosphofructo-2-kinase/fructose-2,6-bisphosphatase 2	0.702123	1.45066	0.750784	0.266442
CCDC22	O60826	O60826	CCD22_HUMAN	Coiled-coil domain-containing protein 22	-0.000673691	-0.0069412	0.00235229	0.99672
PRAF2	O60831	O60831	PRAF2_HUMAN	PRA1 family protein 2	0.514778	1.56082	0.82499	0.230004
DKC1	O60832	O60832	DKC1_HUMAN	H/ACA ribonucleoprotein complex subunit DKC1	-0.405587	-1.3954	0.714202	0.285449
EIF5B	O60841	O60841	IF2P_HUMAN	Eukaryotic translation initiation factor 5B	0.596768	2.92049	1.81566	0.0306356
EDF1	O60869	O60869	EDF1_HUMAN	Endothelial differentiation-related factor 1	-0.239891	-1.82684	1.0102	0.157566
KIN	O60870	O60870	KIN17_HUMAN	DNA/RNA-binding protein KIN17	0.947955	2.6173	1.58979	0.0481564
DIAPH2	O60879	O60879	DIAP2_HUMAN	Protein diaphanous homolog 2	-0.543245	-3.9655	2.57469	0.0076458
DNAJA2	O60884	O60884	DNJA2_HUMAN	DnaJ homolog subfamily A member 2	-0.0977655	-0.918234	0.42009	0.494736
BRD4	O60885	Q15059;O60885	BRD4_HUMAN	Bromodomain-containing protein 4	0.0709905	0.627589	0.264132	0.654897
CUTA	O60888	O60888	CUTA_HUMAN	Protein CutA	0.298859	1.70834	0.926752	0.186785
SMPD2	O60906	O60906	NSMA_HUMAN	Sphingomyelin phosphodiesterase 2	-0.370545	-1.21648	0.599059	0.353973
HUS1	O60921	O60921	HUS1_HUMAN	Checkpoint protein HUS1	1.24131	4.1084	2.67449	0.00645578
PFDN1	O60925	O60925	PFD1_HUMAN	Prefoldin subunit 1	0.0389493	0.320217	0.121826	0.832861
NBN	O60934	O60934	NBN_HUMAN	Nibrin	0.187462	1.4256	0.734136	0.274978
NOL3	O60936	O60936	NOL3_HUMAN	Nucleolar protein 3	-0.441564	-1.18256	0.577843	0.366187
DTNB	O60941	O60941	DTNB_HUMAN	Dystrobrevin beta	-0.450932	-2.11912	1.22103	0.10097
RNGTT	O60942	O60942	MCE1_HUMAN	mRNA-capping enzyme	0.412564	1.11488	0.536141	0.395742
ABCB7	O75027	O75027	ABCB7_HUMAN	Iron-sulfur clusters transporter ABCB7, mitochondrial	0.33885	1.78661	0.981712	0.167461
SRGAP2	O75044	O75044;Q7Z6B7	SRGP2_HUMAN	SLIT-ROBO Rho GTPase-activating protein 2	0.178184	0.864491	0.38979	0.521743
IGSF3	O75054	O75054	IGSF3_HUMAN	Immunoglobulin superfamily member 3	1.51773	2.81778	1.73922	0.0350434
FAM20B	O75063	O75063	XYLK_HUMAN	Glycosaminoglycan xylosylkinase	0.330927	0.889752	0.403953	0.508016
DENND4B	O75064	O75064	DEN4B_HUMAN	DENN domain-containing protein 4B	1.24077	3.37728	2.15276	0.0162097
WDR1	O75083	O75083	WDR1_HUMAN	WD repeat-containing protein 1	-0.0758199	-0.372839	0.144451	0.803073
SLIT3	O75094	O75094	SLIT3_HUMAN	Slit homolog 3 protein	-0.216847	-0.698766	0.300487	0.613349
ATP9A	O75110	O75110	ATP9A_HUMAN	Probable phospholipid-transporting ATPase IIA	0.0300667	0.157819	0.0566338	0.923435
ROCK2	O75116	O75116	ROCK2_HUMAN	Rho-associated protein kinase 2	-0.0736574	-0.667413	0.28432	0.630371
CLASP2	O75122	O75122	CLAP2_HUMAN	CLIP-associating protein 2	-0.0748387	-0.668413	0.284833	0.630402
PTCD1	O75127	O75127	PTCD1_HUMAN	Pentatricopeptide repeat-containing protein 1, mitochondrial	0.324358	1.07643	0.512838	0.411838
COBL	O75128	O75128	COBL_HUMAN	Protein cordon-bleu	-1.26039	-3.04008	1.90445	0.0259284
CPNE3	O75131	O75131	CPNE3_HUMAN	Copine-3	-0.27313	-1.8207	1.00584	0.158585
ICOSLG	O75144	O75144	ICOSL_HUMAN	ICOS ligand	-0.726734	-1.89063	1.05566	0.14382
HIP1R	O75146	O75146	HIP1R_HUMAN	Huntingtin-interacting protein 1-related protein	0.310371	1.12666	0.543335	0.39135
OBSL1	O75147	O75147	OBSL1_HUMAN	Obscurin-like protein 1	-0.104471	-0.223233	0.0820494	0.888707
RNF40	O75150	O75150	BRE1B_HUMAN	E3 ubiquitin-protein ligase BRE1B	0.259538	2.41903	1.44223	0.0635333
PHF2	O75151	O75151	PHF2_HUMAN	Lysine-specific demethylase PHF2	-1.00411	-3.13357	1.97364	0.0226283
ZC3H11A	O75152	O75152	ZC11A_HUMAN	Zinc finger CCCH domain-containing protein 11A	0.0286911	0.295281	0.111361	0.847122
CLUH	O75153	O75153	CLU_HUMAN	Clustered mitochondria protein homolog	0.0698968	0.502491	0.203285	0.727272
CAND2	O75155	O75155	CAND2_HUMAN	Cullin-associated NEDD8-dissociated protein 2	0.46334	0.850149	0.381812	0.528209
NPHP4	O75161	O75161	NPHP4_HUMAN	Nephrocystin-4	-1.45014	-1.98684	1.12486	0.125122
KDM4A	O75164	O75164	KDM4A_HUMAN	Lysine-specific demethylase 4A	0.805012	1.32805	0.670247	0.311125
DNAJC13	O75165	O75165	DJC13_HUMAN	DnaJ homolog subfamily C member 13	0.190063	1.51737	0.795527	0.24431
PPP6R2	O75170	O75170	PP6R2_HUMAN	Serine/threonine-protein phosphatase 6 regulatory subunit 2	-1.06387	-4.75631	3.11191	0.0034121
CNOT3	O75175	O75175	CNOT3_HUMAN	CCR4-NOT transcription complex subunit 3	0.015538	0.24821	0.0920542	0.873767
ANKRD17	O75179	O75179;Q8IWZ3	ANR17_HUMAN	Ankyrin repeat domain-containing protein 17	0.0214902	0.152209	0.0545072	0.926027
SIN3B	O75182	O75182	SIN3B_HUMAN	Paired amphipathic helix protein Sin3b	0.292029	0.849812	0.381625	0.5284
DNAJB6	O75190	Q8WWF6;O75190	DNJB6_HUMAN	DnaJ homolog subfamily B member 6	-0.504382	-1.08789	0.519754	0.406657
XYLB	O75191	O75191	XYLB_HUMAN	Xylulose kinase	0.180254	0.374224	0.145056	0.802233
COQ9	O75208	O75208	COQ9_HUMAN	Ubiquinone biosynthesis protein COQ9, mitochondrial	0.083984	0.428053	0.168972	0.768853
GGCT	O75223	O75223	GGCT_HUMAN	Gamma-glutamylcyclotransferase	-0.245691	-0.775198	0.34088	0.569225
NDUFS7	O75251	O75251	NDUS7_HUMAN	NADH dehydrogenase [ubiquinone] iron-sulfur protein 7, mitochondrial	-0.20201	-0.897892	0.408547	0.50451
NDUFS2	O75306	O75306	NDUS2_HUMAN	NADH dehydrogenase [ubiquinone] iron-sulfur protein 2, mitochondrial	-0.0193168	-0.0825365	0.0287943	0.963581
CDH16	O75309	O75309	CAD16_HUMAN	Cadherin-16	-0.773087	-1.3201	0.665102	0.314342
ZPR1	O75312	O75312	ZPR1_HUMAN	Zinc finger protein ZPR1	0.139916	1.64198	0.880657	0.204324
USP12;USP46	O75317;P62068	O75317;P62068	UBP12_HUMAN;UBP46_HUMAN	Ubiquitin carboxyl-terminal hydrolase 12	-0.453622	-2.84619	1.76037	0.0338766
NIPSNAP2	O75323	O75323	NIPS2_HUMAN	Protein NipSnap homolog 2	-0.0853083	-0.30109	0.113784	0.844021
PDCD6	O75340	O75340	PDCD6_HUMAN	Programmed cell death protein 6	-0.0412103	-0.162298	0.0583377	0.920194
TBCA	O75347	O75347	TBCA_HUMAN	Tubulin-specific chaperone A	-0.280303	-1.20963	0.594753	0.356241
ATP6V1G1	O75348	O75348	VATG1_HUMAN	V-type proton ATPase subunit G 1	-0.00951203	-0.0411225	0.0141212	0.981804
VPS4B	O75351	O75351	VPS4B_HUMAN	Vacuolar protein sorting-associated protein 4B	-0.0848849	-0.616597	0.258629	0.661578
MPDU1	O75352	O75352	MPU1_HUMAN	Mannose-P-dolichol utilization defect 1 protein	-0.511901	-2.89046	1.79332	0.0319513
ENTPD5	O75356	O75356	ENTP5_HUMAN	Nucleoside diphosphate phosphatase ENTPD5	0.26967	1.48313	0.77248	0.2549
ZNF217	O75362	O75362	ZN217_HUMAN	Zinc finger protein 217	0.562675	2.61041	1.58465	0.0485841
BCAS1	O75363	O75363	BCAS1_HUMAN	Breast carcinoma-amplified sequence 1	0	NaN	NaN	1
MACROH2A1	O75367	O75367	H2AY_HUMAN	Core histone macro-H2A.1	-0.299711	-1.30578	0.655871	0.318954
SH3BGRL	O75368	O75368	SH3L1_HUMAN	Adapter SH3BGRL	-0.674891	-3.7301	2.40786	0.0102618
FLNB	O75369	O75369	FLNB_HUMAN	Filamin-B	-0.186624	-0.990866	0.462029	0.454984
NCOR1	O75376	O75376	NCOR1_HUMAN	Nuclear receptor corepressor 1	-0.209464	-1.91703	1.07458	0.138753
NDUFS6	O75380	O75380	NDUS6_HUMAN	NADH dehydrogenase [ubiquinone] iron-sulfur protein 6, mitochondrial	-1.54377	-2.30152	1.35517	0.0757562
PEX14	O75381	O75381	PEX14_HUMAN	Peroxisomal membrane protein PEX14	0.69753	2.377	1.41105	0.0675547
TRIM3	O75382	O75382	TRIM3_HUMAN	Tripartite motif-containing protein 3	-0.575603	-1.31394	0.661131	0.316023
ULK1	O75385	O75385	ULK1_HUMAN	Serine/threonine-protein kinase ULK1	0.611905	1.41416	0.72657	0.279088
TULP3	O75386	O75386	TULP3_HUMAN	Tubby-related protein 3	0.24751	0.498394	0.20136	0.730041
CS	O75390	O75390	CISY_HUMAN	Citrate synthase, mitochondrial	1.06088	6.42394	4.1194	0.000716981
SPAG7	O75391	O75391	SPAG7_HUMAN	Sperm-associated antigen 7	-0.757542	-4.45532	2.91186	0.0046772
SEC22B	O75396	O75396	SC22B_HUMAN	Vesicle-trafficking protein SEC22b	0.0331231	0.459909	0.183481	0.75149
PRPF40A	O75400	O75400	PR40A_HUMAN	Pre-mRNA-processing factor 40 homolog A	0.250753	2.45365	1.46795	0.0603751
TACC1	O75410	O75410	TACC1_HUMAN	Transforming acidic coiled-coil-containing protein 1	-2.16774	-3.56745	2.29095	0.0124094
NME6	O75414	O75414	NDK6_HUMAN	Nucleoside diphosphate kinase 6	0.859388	1.51446	0.793562	0.245167
GIGYF1	O75420	O75420	GGYF1_HUMAN	GRB10-interacting GYF protein 1	0.323967	0.903142	0.411517	0.501605
LRCH4	O75427	O75427	LRCH4_HUMAN	Leucine-rich repeat and calponin homology domain-containing protein 4	-0.0429846	-0.254915	0.0947684	0.870892
MTX2	O75431	O75431	MTX2_HUMAN	Metaxin-2	0.215432	1.73919	0.948335	0.178919
VPS26A	O75436	O75436	VP26A_HUMAN	Vacuolar protein sorting-associated protein 26A	-0.076789	-0.576115	0.238619	0.683594
NDUFB1	O75438	O75438	NDUB1_HUMAN	NADH dehydrogenase [ubiquinone] 1 beta subcomplex subunit 1	-0.620239	-1.94125	1.09198	0.133872
PMPCB	O75439	O75439	MPPB_HUMAN	Mitochondrial-processing peptidase subunit beta	0.570299	1.96588	1.10972	0.129543
SAP30	O75446	O75446	SAP30_HUMAN	Histone deacetylase complex subunit SAP30	0.743098	2.08218	1.19407	0.107016
MED24	O75448	O75448	MED24_HUMAN	Mediator of RNA polymerase II transcription subunit 24	0.152962	1.11107	0.533816	0.396609
KATNA1	O75449	O75449	KTNA1_HUMAN	Katanin p60 ATPase-containing subunit A1	0.547157	1.64462	0.882485	0.203739
PSIP1	O75475	O75475	PSIP1_HUMAN	PC4 and SFRS1-interacting protein	0.126075	0.571657	0.23644	0.686162
ERLIN1	O75477	O75477	ERLN1_HUMAN	Erlin-1	-1.23179	-5.16892	3.377	0.0023871
GPC4	O75487	O75487	GPC4_HUMAN	Glypican-4	-0.370162	-1.33856	0.67706	0.306482
NDUFS3	O75489	O75489	NDUS3_HUMAN	NADH dehydrogenase [ubiquinone] iron-sulfur protein 3, mitochondrial	-0.0341723	-0.13901	0.049537	0.933739
SRSF10	O75494	O75494	SRS10_HUMAN	Serine/arginine-rich splicing factor 10	-0.00917522	-0.0673446	0.023359	0.970214
CLN5	O75503	O75503	CLN5_HUMAN	Ceroid-lipofuscinosis neuronal protein 5	-0.21278	-0.378788	0.147055	0.800167
HSBP1	O75506	O75506	HSBP1_HUMAN	Heat shock factor-binding protein 1	-1.08333	-5.05831	3.30698	0.00262687
ECI2	O75521	O75521	ECI2_HUMAN	Enoyl-CoA delta isomerase 2	0.188046	0.931464	0.427645	0.487576
KHDRBS3	O75525	O75525	KHDR3_HUMAN	KH domain-containing, RNA-binding, signal transduction-associated protein 3	0.577354	1.93407	1.08682	0.135219
EED	O75530	O75530	EED_HUMAN	Polycomb protein EED	0.55308	2.97741	1.85796	0.0283452
BANF1	O75531	O75531	BAF_HUMAN	Barrier-to-autointegration factor	-0.771867	-6.77102	4.30866	0.000731707
SF3B1	O75533	O75533	SF3B1_HUMAN	Splicing factor 3B subunit 1	0.242607	3.01713	1.88743	0.0267291
CSDE1	O75534	O75534	CSDE1_HUMAN	Cold shock domain-containing protein E1	0.487038	5.29409	3.45532	0.00229825
WBP4	O75554	O75554	WBP4_HUMAN	WW domain-binding protein 4	-0.0351822	-0.0934403	0.0327332	0.95737
PRKRA	O75569	O75569	PRKRA_HUMAN	Interferon-inducible double-stranded RNA-dependent protein kinase activator A	0.506479	3.26262	2.06873	0.0188529
RPS6KA5	O75582	O75582	KS6A5_HUMAN	Ribosomal protein S6 kinase alpha-5	0.0424448	0.166476	0.0599319	0.918198
MED6	O75586	O75586	MED6_HUMAN	Mediator of RNA polymerase II transcription subunit 6	0.25805	2.88845	1.79183	0.0321288
MYCBP2	O75592	O75592	MYCB2_HUMAN	E3 ubiquitin-protein ligase MYCBP2	-0.369966	-3.0973	1.94682	0.0236746
SPAG6	O75602	O75602	SPAG6_HUMAN	Sperm-associated antigen 6	-2.33522	-2.91749	1.81343	0.0307278
USP2	O75604	O75604	UBP2_HUMAN	Ubiquitin carboxyl-terminal hydrolase 2	0	NaN	NaN	1
LYPLA1	O75608	O75608	LYPA1_HUMAN	Acyl-protein thioesterase 1	0.159675	0.801561	0.355131	0.554228
ERAL1	O75616	O75616	ERAL1_HUMAN	GTPase Era, mitochondrial	-0.0574986	-0.104761	0.0368562	0.952882
REM1	O75628	O75628	REM1_HUMAN	GTP-binding protein REM 1	-0.618813	-1.91057	1.06995	0.140074
SNRNP200	O75643	O75643	U520_HUMAN	U5 small nuclear ribonucleoprotein 200 kDa helicase	0.0783678	0.891847	0.405134	0.507172
TRMU	O75648	O75648	MTU1_HUMAN	Mitochondrial tRNA-specific 2-thiouridylase 1	0.226181	0.523416	0.213188	0.714927
TIPRL	O75663	O75663	TIPRL_HUMAN	TIP41-like protein	0.366955	1.76424	0.965939	0.17223
OFD1	O75665	O75665	OFD1_HUMAN	Centriole and centriolar satellite protein OFD1	-0.744162	-1.23753	0.612325	0.345705
TOM1L1	O75674	O75674	TM1L1_HUMAN	TOM1-like protein 1	-1.46351	-2.80613	1.73054	0.0355764
RPS6KA4	O75676	O75676	KS6A4_HUMAN	Ribosomal protein S6 kinase alpha-4	-0.734918	-1.22708	0.605726	0.349772
SURF6	O75683	O75683	SURF6_HUMAN	Surfeit locus protein 6	-0.814012	-4.27062	2.78638	0.00541085
PPM1B	O75688	O75688	PPM1B_HUMAN	Protein phosphatase 1B	0.169847	0.978977	0.455088	0.460799
ADAP1	O75689	O75689;Q9NPF8	ADAP1_HUMAN	Arf-GAP with dual PH domain-containing protein 1	-1.34364	-4.23207	2.75993	0.00572075
UTP20	O75691	O75691	UTP20_HUMAN	Small subunit processome component 20 homolog	-0.149719	-0.894771	0.406784	0.506003
NUP155	O75694	O75694	NU155_HUMAN	Nuclear pore complex protein Nup155	0.242427	3.12846	1.96986	0.0228307
RP2	O75695	O75695	XRP2_HUMAN	Protein XRP2	-0.146098	-0.563115	0.23228	0.69163
STK16	O75716	O75716	STK16_HUMAN	Serine/threonine-protein kinase 16	0.0116009	0.0494356	0.0170301	0.977992
WDHD1	O75717	O75717	WDHD1_HUMAN	WD repeat and HMG-box DNA-binding protein 1	-0.166972	-0.466449	0.186492	0.747435
CRTAP	O75718	O75718	CRTAP_HUMAN	Cartilage-associated protein	0.547848	2.66892	1.62826	0.044491
SLC25A12	O75746	O75746	S2512_HUMAN	Electrogenic aspartate/glutamate antiporter SLC25A12, mitochondrial	0.592818	2.34382	1.38646	0.071058
TCEA3	O75764	O75764	TCEA3_HUMAN	Transcription elongation factor A protein 3	-0.115983	-0.417361	0.164161	0.775843
PALM	O75781	O75781	PALM_HUMAN	Paralemmin-1	-1.31298	-2.56746	1.55265	0.0517456
ATP6AP2	O75787	O75787	RENR_HUMAN	Renin receptor	0.098587	1.44498	0.747001	0.268555
RNASEH2A	O75792	O75792	RNH2A_HUMAN	Ribonuclease H2 subunit A	-0.261806	-1.32946	0.671156	0.310505
CDC123	O75794	O75794	CD123_HUMAN	Cell division cycle protein 123 homolog	0.507467	1.71854	0.933879	0.184256
ZMYND10	O75800	O75800	ZMY10_HUMAN	Zinc finger MYND domain-containing protein 10	-1.43832	-2.36739	1.40392	0.0684877
BCAR3	O75815	O75815	BCAR3_HUMAN	Breast cancer anti-estrogen resistance protein 3	0.719281	1.39414	0.713373	0.285851
POP7	O75817	O75817	POP7_HUMAN	Ribonuclease P protein subunit p20	0.381172	3.38936	2.16157	0.0160041
RPP40	O75818	O75818	RPP40_HUMAN	Ribonuclease P protein subunit p40	1.36082	8.23452	5.03934	0.000121212
EIF3G	O75821	O75821	EIF3G_HUMAN	Eukaryotic translation initiation factor 3 subunit G	0.0240657	0.276361	0.10353	0.858629
EIF3J	O75822	O75822	EIF3J_HUMAN	Eukaryotic translation initiation factor 3 subunit J	-0.167644	-1.22575	0.604893	0.350498
CBR3	O75828	O75828	CBR3_HUMAN	Carbonyl reductase [NADPH] 3	0.361098	0.343655	0.131813	0.820033
PSMD10	O75832	O75832	PSD10_HUMAN	26S proteasome non-ATPase regulatory subunit 10	-0.29543	-3.66424	2.36067	0.01116
AP1G2	O75843	O75843	AP1G2_HUMAN	AP-1 complex subunit gamma-like 2	-0.0105987	-0.0523854	0.0180667	0.977258
ZMPSTE24	O75844	O75844	FACE1_HUMAN	CAAX prenyl protease 1 homolog	0.606152	4.91542	3.21539	0.00306271
IDH1	O75874	O75874	IDHC_HUMAN	Isocitrate dehydrogenase [NADP] cytoplasmic	-0.0564272	-0.201705	0.0735589	0.900329
GATB	O75879	O75879	GATB_HUMAN	Glutamyl-tRNA(Gln) amidotransferase subunit B, mitochondrial	-0.0664468	-0.143829	0.051346	0.930815
SCO1	O75880	O75880	SCO1_HUMAN	Protein SCO1 homolog, mitochondrial	-0.15524	-0.602587	0.251658	0.668364
CYP7B1	O75881	O75881	CP7B1_HUMAN	Cytochrome P450 7B1	-0.453712	-2.85044	1.76354	0.0336745
ATRN	O75882	O75882	ATRN_HUMAN	Attractin	0.324831	1.22743	0.605951	0.349621
RBBP9	O75884	O75884	RBBP9_HUMAN	Serine hydrolase RBBP9	-0.229762	-0.939594	0.432307	0.483514
STAM2	O75886	O75886	STAM2_HUMAN	Signal transducing adapter molecule 2	-0.256552	-3.98507	2.58842	0.00739225
TUSC2	O75896	O75896	TUSC2_HUMAN	Tumor suppressor candidate 2	0.277804	0.88245	0.399845	0.511977
CCNK	O75909	O75909	CCNK_HUMAN	Cyclin-K	0.268837	1.89343	1.05766	0.143457
ARL6IP5	O75915	O75915	PRAF3_HUMAN	PRA1 family protein 3	-0.142435	-0.474621	0.190271	0.74291
PIAS1	O75925	O75925	PIAS1_HUMAN	E3 SUMO-protein ligase PIAS1	0.263596	1.19241	0.583978	0.3626
PIAS2	O75928	Q9Y6X2;O75928	PIAS2_HUMAN	E3 SUMO-protein ligase PIAS2	0.149708	1.06759	0.507519	0.416221
BCAS2	O75934	O75934	SPF27_HUMAN	Pre-mRNA-splicing factor SPF27	0.0940535	0.941698	0.433516	0.482698
DCTN3	O75935	O75935	DCTN3_HUMAN	Dynactin subunit 3	-0.135859	-0.883282	0.400312	0.511564
BBOX1	O75936	O75936	BODG_HUMAN	Gamma-butyrobetaine dioxygenase	-1.31247	-1.48707	0.775125	0.253639
DNAJC8	O75937	O75937	DNJC8_HUMAN	DnaJ homolog subfamily C member 8	0.138823	1.01125	0.473995	0.443981
SMNDC1	O75940	O75940	SPF30_HUMAN	Survival of motor neuron-related-splicing factor 30	0.103397	0.854002	0.383951	0.526158
RAD17	O75943	O75943	RAD17_HUMAN	Cell cycle checkpoint protein RAD17	-0.0064557	-0.0462592	0.0159165	0.979222
ATP5PD	O75947	O75947	ATP5H_HUMAN	ATP synthase subunit d, mitochondrial	0.167997	0.650287	0.275591	0.641315
FLOT1	O75955	O75955	FLOT1_HUMAN	Flotillin-1	-0.401076	-2.31265	1.3634	0.0745471
TRIO	O75962	O75962	TRIO_HUMAN	Triple functional domain protein	0.308509	1.87034	1.04117	0.147613
ATP5MG	O75964	O75964	ATP5L_HUMAN	ATP synthase subunit g, mitochondrial	0.226592	0.794514	0.351306	0.558276
MPDZ	O75970	O75970	MPDZ_HUMAN	Multiple PDZ domain protein	-0.316775	-0.793789	0.350913	0.558411
CPD	O75976	O75976	CBPD_HUMAN	Carboxypeptidase D	-0.260504	-2.16747	1.25644	0.093008
GLRX3	O76003	O76003	GLRX3_HUMAN	Glutaredoxin-3	0.931334	2.95857	1.84396	0.029003
RSL1D1	O76021	O76021	RL1D1_HUMAN	Ribosomal L1 domain-containing protein 1	-0.0626692	-0.22388	0.0823065	0.888407
WFS1	O76024	O76024	WFS1_HUMAN	Wolframin	-1.09816	-1.5425	0.812531	0.236075
ANXA9	O76027	O76027	ANXA9_HUMAN	Annexin A9	-2.89004	-3.88069	2.51492	0.00830638
CLPX	O76031	O76031	CLPX_HUMAN	ATP-dependent Clp protease ATP-binding subunit clpX-like, mitochondrial	0.321555	4.15151	2.70437	0.00608056
SEC14L2	O76054	O76054	S14L2_HUMAN	SEC14-like protein 2	0.104502	0.303436	0.114765	0.842383
TM7SF2	O76062	O76062	ERG24_HUMAN	Delta(14)-sterol reductase TM7SF2	0.0538188	0.350259	0.134653	0.81657
SNCG	O76070	O76070	SYUG_HUMAN	Gamma-synuclein	-0.394725	-0.868305	0.39192	0.519487
CIAO1	O76071	O76071	CIAO1_HUMAN	Probable cytosolic iron-sulfur protein assembly protein CIAO1	-0.0612395	-0.53384	0.218162	0.709319
PDE5A	O76074	O76074	PDE5A_HUMAN	cGMP-specific 3',5'-cyclic phosphodiesterase	-0.466284	-0.94494	0.43538	0.480959
SRP72	O76094	O76094	SRP72_HUMAN	Signal recognition particle subunit SRP72	0.119769	0.707926	0.305255	0.607914
DXO	O77932	O77932	DXO_HUMAN	Decapping and exoribonuclease protein	0.522075	2.58332	1.56446	0.0505373
DDAH1	O94760	O94760	DDAH1_HUMAN	N(G),N(G)-dimethylarginine dimethylaminohydrolase 1	-1.96305	-8.43461	5.13155	0.000142857
RECQL5	O94762	O94762	RECQ5_HUMAN	ATP-dependent DNA helicase Q5	0.085973	0.783775	0.345499	0.563897
URI1	O94763	O94763	RMP_HUMAN	Unconventional prefoldin RPB5 interactor 1	0.0269546	0.184747	0.0669582	0.909074
B3GAT3	O94766	Q9NPZ5;O94766	B3GA3_HUMAN	Galactosylgalactosylxylosylprotein 3-beta-glucuronosyltransferase 3	-0.155847	-0.327633	0.12497	0.829056
MTA2	O94776	O94776	MTA2_HUMAN	Metastasis-associated protein MTA2	0.673553	4.24752	2.77054	0.00559082
ALDH1A2	O94788	O94788	AL1A2_HUMAN	Retinal dehydrogenase 2	-4.03349	-4.81901	3.15288	0.00324923
TPPP	O94811	O94811	TPPP_HUMAN	Tubulin polymerization-promoting protein	-1.30244	-1.85133	1.02761	0.151889
KBTBD11	O94819	O94819	KBTBB_HUMAN	Kelch repeat and BTB domain-containing protein 11	-2.10869	-8.10341	4.97798	0.000102564
LTN1	O94822	O94822	LTN1_HUMAN	E3 ubiquitin-protein ligase listerin	0.0286273	0.220207	0.0808483	0.89066
TOMM70	O94826	O94826	TOM70_HUMAN	Mitochondrial import receptor subunit TOM70	0.430414	2.07531	1.18906	0.108151
IPO13	O94829	O94829	IPO13_HUMAN	Importin-13	-0.022759	-0.209119	0.076469	0.896581
DDHD2	O94830	O94830	DDHD2_HUMAN	Phospholipase DDHD2	-0.754953	-1.32177	0.66618	0.31376
MYO1D	O94832	O94832;B0I1T2	MYO1D_HUMAN	Unconventional myosin-Id	-0.667678	-3.32081	2.11144	0.0173384
TOX4	O94842	O94842	TOX4_HUMAN	TOX high mobility group box family member 4	0.241817	0.682975	0.292315	0.621451
SEC24D	O94855	O94855	SC24D_HUMAN	Protein transport protein Sec24D	0.196155	1.43798	0.742351	0.270752
NFASC	O94856	O94856	NFASC_HUMAN	Neurofascin	-0.37471	-0.725347	0.314377	0.597245
SUPT7L	O94864	O94864	ST65G_HUMAN	STAGA complex 65 subunit gamma	0.504257	1.48232	0.77194	0.255128
UFL1	O94874	Q92845;O94874	UFL1_HUMAN	E3 UFM1-protein ligase 1	-0.465512	-3.15132	1.98675	0.0220961
SORBS2	O94875	O94875	SRBS2_HUMAN	Sorbin and SH3 domain-containing protein 2	-1.58048	-3.57312	2.29505	0.0124313
PHF14	O94880	O94880	PHF14_HUMAN	PHD finger protein 14	-0.475058	-2.87048	1.77845	0.0328767
TMEM63A	O94886	O94886	CSCL1_HUMAN	CSC1-like protein 1	0.162518	0.484079	0.194665	0.736601
FARP2	O94887	O94887	FARP2_HUMAN	FERM, ARHGEF and pleckstrin domain-containing protein 2	-1.00072	-4.19012	2.73105	0.00582278
UBXN7	O94888	O94888	UBXN7_HUMAN	UBX domain-containing protein 7	0.202547	2.0685	1.18411	0.109546
SUN1	O94901	O94901	SUN1_HUMAN	SUN domain-containing protein 1	-0.0907263	-0.532808	0.217668	0.710011
PLPBP	O94903	O94903	PLPHP_HUMAN	Pyridoxal phosphate homeostasis protein	-0.698375	-3.0211	1.89038	0.0266478
ERLIN2	O94905	O94905	ERLN2_HUMAN	Erlin-2	-1.44286	-3.10672	1.95379	0.0235195
PRPF6	O94906	O94906	PRP6_HUMAN	Pre-mRNA-processing factor 6	0.0470647	0.421117	0.165848	0.772976
PCF11	O94913	O94913	PCF11_HUMAN	Pre-mRNA cleavage complex 2 protein Pcf11	0.111773	1.24871	0.619402	0.340954
FRYL	O94915	O94915	FRYL_HUMAN	Protein furry homolog-like	-0.124944	-0.886638	0.402199	0.509831
ENDOD1	O94919	O94919	ENDD1_HUMAN	Endonuclease domain-containing 1 protein	-0.126998	-0.490682	0.197747	0.734277
GLCE	O94923	O94923	GLCE_HUMAN	D-glucuronyl C5-epimerase	-0.841015	-1.76327	0.965256	0.172338
GLS	O94925	O94925	GLSK_HUMAN	Glutaminase kidney isoform, mitochondrial	0.156402	0.574977	0.238062	0.684455
HAUS5	O94927	O94927	HAUS5_HUMAN	HAUS augmin-like complex subunit 5	1.11604	2.80653	1.73083	0.0355866
FBXO21	O94952	O94952	FBX21_HUMAN	F-box only protein 21	-0.695143	-2.34488	1.38725	0.0709325
SOGA1	O94964	O94964	SOGA1_HUMAN	Protein SOGA1	0.238071	1.94848	1.09718	0.132171
USP19	O94966	O94966	UBP19_HUMAN	Ubiquitin carboxyl-terminal hydrolase 19	0.0635113	0.70708	0.304813	0.608035
WDR47	O94967	O94967	WDR47_HUMAN	WD repeat-containing protein 47	-0.296954	-0.638274	0.269511	0.648701
AP2A2	O94973	O94973	AP2A2_HUMAN	AP-2 complex subunit alpha-2	-0.625865	-3.79481	2.454	0.0093725
SEC31A	O94979	O94979	SC31A_HUMAN	Protein transport protein Sec31A	0.0943377	0.678957	0.290245	0.623566
FAM13A	O94988	O94988	FA13A_HUMAN	Protein FAM13A	0.0179047	0.0513455	0.017701	0.977278
HEXIM1	O94992	O94992	HEXI1_HUMAN	Protein HEXIM1	0.252381	2.41519	1.43938	0.0639044
TJP3	O95049	O95049	ZO3_HUMAN	Tight junction protein ZO-3	-0.774597	-2.3678	1.40423	0.0685003
UBR5	O95071	O95071	UBR5_HUMAN	E3 ubiquitin-protein ligase UBR5	0.309937	4.48498	2.93182	0.00448598
AGFG2	O95081	O95081	AGFG2_HUMAN	Arf-GAP domain and FG repeat-containing protein 2	-0.551812	-1.76227	0.964553	0.172353
SCAF4	O95104	O95104	SCAF4_HUMAN	SR-related and CTD-associated factor 4	0.0588691	0.618268	0.259463	0.66115
MFN2	O95140	O95140	MFN2_HUMAN	Mitofusin-2	0.255719	1.70959	0.92762	0.186691
AKR7A3	O95154	O95154	ARK73_HUMAN	Aflatoxin B1 aldehyde reductase member 3	0.129209	0.304141	0.11506	0.842061
UBE4B	O95155	O95155	UBE4B_HUMAN	Ubiquitin conjugation factor E4 B	0.7002	2.39664	1.42561	0.065623
ZFPL1	O95159	O95159	ZFPL1_HUMAN	Zinc finger protein-like 1	0.314547	2.21194	1.28911	0.0867799
ELP1	O95163	O95163	ELP1_HUMAN	Elongator complex protein 1	-0.553682	-3.68164	2.37316	0.0108339
NDUFA3	O95167	O95167	NDUA3_HUMAN	NADH dehydrogenase [ubiquinone] 1 alpha subcomplex subunit 3	-0.909497	-2.2074	1.28577	0.0874497
NDUFB4	O95168	O95168	NDUB4_HUMAN	NADH dehydrogenase [ubiquinone] 1 beta subcomplex subunit 4	-0.713642	-2.08898	1.19903	0.105772
NDUFB8	O95169	O95169	NDUB8_HUMAN	NADH dehydrogenase [ubiquinone] 1 beta subcomplex subunit 8, mitochondrial	-1.94482	-2.19011	1.27306	0.0895464
NDUFB2	O95178	O95178	NDUB2_HUMAN	NADH dehydrogenase [ubiquinone] 1 beta subcomplex subunit 2, mitochondrial	-0.837933	-2.38797	1.41918	0.0663337
NDUFA7	O95182	O95182	NDUA7_HUMAN	NADH dehydrogenase [ubiquinone] 1 alpha subcomplex subunit 7	-0.417096	-2.33311	1.37854	0.0722265
LETM1	O95202	O95202	LETM1_HUMAN	Mitochondrial proton/calcium exchanger protein	1.67107	3.18425	2.01105	0.0212025
EPN2	O95208	O95208	EPN2_HUMAN	Epsin-2	0.259734	0.993506	0.463575	0.453884
STBD1	O95210	O95210	STBD1_HUMAN	Starch-binding domain-containing protein 1	-0.31954	-0.543022	0.222567	0.703894
ZRANB2	O95218	O95218	ZRAB2_HUMAN	Zinc finger Ran-binding domain-containing protein 2	-0.00631563	-0.0514816	0.0177489	0.977438
SNX4	O95219	O95219	SNX4_HUMAN	Sorting nexin-4	-0.0251358	-0.255019	0.0948108	0.870934
LUC7L3	O95232	O95232	LC7L3_HUMAN	Luc7-like protein 3	0.123398	1.17311	0.571967	0.370881
KIF4A	O95239	O95239;Q2VIQ3	KIF4A_HUMAN	Chromosome-associated kinesin KIF4A	1.39851	5.89843	3.81994	0.00118919
MBD4	O95243	O95243	MBD4_HUMAN	Methyl-CpG-binding domain protein 4	-0.152129	-0.623299	0.261981	0.657594
SBF1	O95248	O95248	MTMR5_HUMAN	Myotubularin-related protein 5	-0.998336	-2.86776	1.77643	0.0328842
GOSR1	O95249	O95249	GOSR1_HUMAN	Golgi SNAP receptor complex member 1	-0.556967	-1.35546	0.688048	0.300192
KAT7	O95251	O95251	KAT7_HUMAN	Histone acetyltransferase KAT7	-0.0544252	-0.50378	0.203892	0.726935
ATE1	O95260	O95260	ATE1_HUMAN	Arginyl-tRNA--protein transferase 1	-0.241214	-2.45717	1.47057	0.0601841
VAPB	O95292	O95292	VAPB_HUMAN	Vesicle-associated membrane protein-associated protein B/C	0.201096	1.48378	0.772919	0.254658
RASAL1	O95294	O95294	RASL1_HUMAN	RasGAP-activating-like protein 1	-0.843402	-1.41737	0.728694	0.278189
SNAPIN	O95295	O95295	SNAPN_HUMAN	SNARE-associated protein Snapin	-0.343126	-3.37116	2.14828	0.0163607
NDUFC2	O95298	O95298	NDUC2_HUMAN	NADH dehydrogenase [ubiquinone] 1 subunit C2	-0.454725	-2.29973	1.35385	0.0759517
NDUFA10	O95299	O95299	NDUAA_HUMAN	NADH dehydrogenase [ubiquinone] 1 alpha subcomplex subunit 10, mitochondrial	-0.681892	-2.23301	1.30462	0.0842302
FKBP9	O95302	O95302	FKBP9_HUMAN	Peptidyl-prolyl cis-trans isomerase FKBP9	0.440729	1.429	0.73639	0.273659
CELF2	O95319	O95319	CELF2_HUMAN	CUGBP Elav-like family member 2	-0.9198	-1.43575	0.740868	0.271425
PGLS	O95336	O95336	6PGL_HUMAN	6-phosphogluconolactonase	-0.289295	-1.68198	0.908385	0.194269
PAPSS2	O95340	O95340	PAPS2_HUMAN	Bifunctional 3'-phosphoadenosine 5'-phosphosulfate synthase 2	-0.381946	-0.514909	0.209148	0.71949
SMC2	O95347	O95347	SMC2_HUMAN	Structural maintenance of chromosomes protein 2	1.67258	4.14261	2.69822	0.00615225
ATG7	O95352	O95352	ATG7_HUMAN	Ubiquitin-like modifier-activating enzyme ATG7	-0.364313	-3.19775	2.021	0.0206743
TACC2	O95359	O95359	TACC2_HUMAN	Transforming acidic coiled-coil-containing protein 2	-0.352123	-0.923756	0.423239	0.492149
FARS2	O95363	O95363	SYFM_HUMAN	Phenylalanine--tRNA ligase, mitochondrial	0.545633	2.55931	1.54658	0.0523784
LYPLA2	O95372	O95372	LYPA2_HUMAN	Acyl-protein thioesterase 2	0.252121	1.02004	0.479185	0.439344
IPO7	O95373	O95373	IPO7_HUMAN	Importin-7	0.18868	1.13824	0.550437	0.385976
ARIH2	O95376	O95376	ARI2_HUMAN	E3 ubiquitin-protein ligase ARIH2	-0.0369476	-0.375874	0.145778	0.801502
SLU7	O95391	O95391	SLU7_HUMAN	Pre-mRNA-splicing factor SLU7	1.0336	1.99364	1.12977	0.123751
PGM3	O95394	O95394	AGM1_HUMAN	Phosphoacetylglucosamine mutase	0.0652368	0.417014	0.164006	0.775862
MOCS3	O95396	O95396	MOCS3_HUMAN	Adenylyltransferase and sulfurtransferase MOCS3	-0.380441	-2.44178	1.45913	0.061442
CD2BP2	O95400	O95400	CD2B2_HUMAN	CD2 antigen cytoplasmic tail-binding protein 2	-0.102823	-0.531722	0.217149	0.710364
MED26	O95402	O95402	MED26_HUMAN	Mediator of RNA polymerase II transcription subunit 26	0.375949	2.29963	1.35377	0.0759305
SVIL	O95425	O95425	SVIL_HUMAN	Supervillin	0.0860223	0.329164	0.125621	0.828555
PAPLN	O95428	O95428	PPN_HUMAN	Papilin	-1.95253	-4.85141	3.17395	0.00319243
BAG4	O95429	O95429	BAG4_HUMAN	BAG family molecular chaperone regulator 4	-0.0112588	-0.0362762	0.0124338	0.983804
AHSA1	O95433	O95433	AHSA1_HUMAN	Activator of 90 kDa heat shock protein ATPase homolog 1	-0.0105975	-0.0539715	0.018625	0.976504
SLC34A2	O95436	O95436	NPT2B_HUMAN	Sodium-dependent phosphate transport protein 2B	-0.447223	-0.910273	0.415562	0.498344
PARN	O95453	O95453	PARN_HUMAN	Poly(A)-specific ribonuclease PARN	-0.0172554	-0.100487	0.0352954	0.95445
PSMG1	O95456	O95456	PSMG1_HUMAN	Proteasome assembly chaperone 1	0.0638788	0.279149	0.104678	0.857039
FMNL1	O95466	O95466	FMNL1_HUMAN	Formin-like protein 1	-0.729338	-1.43879	0.742886	0.27072
SGPL1	O95470	O95470	SGPL1_HUMAN	Sphingosine-1-phosphate lyase 1	0.636014	2.84633	1.76047	0.0338918
NSA2	O95478	O95478	NSA2_HUMAN	Ribosome biogenesis protein NSA2 homolog	0.247181	1.8177	1.00371	0.159377
H6PD	O95479	O95479	G6PE_HUMAN	GDH/6PGL endoplasmic bifunctional protein	-0.785946	-3.51969	2.25639	0.0131186
SEC24A	O95486	O95486	SC24A_HUMAN	Protein transport protein Sec24A	-0.0494492	-0.386917	0.150627	0.794877
SEC24B	O95487	O95487	SC24B_HUMAN	Protein transport protein Sec24B	-0.374166	-3.23552	2.04881	0.0195881
ADGRL2	O95490	O95490	AGRL2_HUMAN	Adhesion G protein-coupled receptor L2	0.0105752	0.0354678	0.0121529	0.984176
SLC2A10	O95528	O95528	GTR10_HUMAN	Solute carrier family 2, facilitated glucose transporter member 10	-0.422219	-1.66409	0.895957	0.198532
TDP2	O95551	O95551	TYDP2_HUMAN	Tyrosyl-DNA phosphodiesterase 2	0.257546	2.46788	1.47853	0.0594283
MPC2	O95563	O95563	MPC2_HUMAN	Mitochondrial pyruvate carrier 2	0.31944	1.81663	1.00295	0.159493
ETHE1	O95571	O95571	ETHE1_HUMAN	Persulfide dioxygenase ETHE1, mitochondrial	0.172253	0.493217	0.198932	0.732648
ACSL3	O95573	O95573	ACSL3_HUMAN	Fatty acid CoA ligase Acsl3	0.252587	2.44854	1.46416	0.0608544
POLR1A	O95602	O95602	RPA1_HUMAN	DNA-directed RNA polymerase I subunit RPA1	-0.0630427	-0.564095	0.232756	0.691286
PCNT	O95613	O95613	PCNT_HUMAN	Pericentrin	0.232878	0.859557	0.38704	0.524096
YEATS4	O95619	O95619	YETS4_HUMAN	YEATS domain-containing protein 4	0.0584198	0.684506	0.293104	0.620555
CNOT4	O95628	O95628	CNOT4_HUMAN	CCR4-NOT transcription complex subunit 4	0.209208	1.98663	1.12471	0.125144
STAMBP	O95630	O95630	STABP_HUMAN	STAM-binding protein	-0.151065	-2.15471	1.24708	0.0949482
CPSF4	O95639	O95639	CPSF4_HUMAN	Cleavage and polyadenylation specificity factor subunit 4	0.386119	0.733953	0.318911	0.59198
NFATC1	O95644	O95644	NFAC1_HUMAN	Nuclear factor of activated T-cells, cytoplasmic 1	0.294068	1.2822	0.640737	0.327735
ASMTL	O95671	O95671	ASML_HUMAN	Probable bifunctional dTTP/UTP pyrophosphatase/methyltransferase protein	-1.12038	-3.02895	1.8962	0.0263286
EYA4	O95677	O95677	EYA4_HUMAN	Eyes absent homolog 4	-1.61621	-3.95784	2.5693	0.00767927
CEP43	O95684	O95684	CEP43_HUMAN	Centrosomal protein 43	0.00311335	0.0242449	0.00827158	0.988728
BRD1	O95696	O95696	BRD1_HUMAN	Bromodomain-containing protein 1	-0.602758	-3.73642	2.41237	0.0101248
POP4	O95707	O95707	RPP29_HUMAN	Ribonuclease P protein subunit p29	0.155372	0.440636	0.174672	0.761776
RAB3D	O95716	P20337;O95716;Q96E17	RAB3D_HUMAN	Ras-related protein Rab-3D	0.290425	2.48205	1.48907	0.0581268
ESRRA;ESRRB	O95718;P11474	O95718;P11474	ERR1_HUMAN;ERR2_HUMAN	Steroid hormone receptor ERR2	0.1811	0.57272	0.23696	0.685612
SNAP29	O95721	O95721	SNP29_HUMAN	Synaptosomal-associated protein 29	-0.0931324	-0.461967	0.184428	0.750534
OXSR1	O95747	O95747	OXSR1_HUMAN	Serine/threonine-protein kinase OSR1	0.109969	0.378954	0.147128	0.800124
GGPS1	O95749	O95749	GGPPS_HUMAN	Geranylgeranyl pyrophosphate synthase	0.306714	1.03597	0.488626	0.431721
RAB36	O95755	O95755	RAB36_HUMAN	Ras-related protein Rab-36	-0.809	-1.75377	0.958579	0.174942
HSPA4L	O95757	O95757	HS74L_HUMAN	Heat shock 70 kDa protein 4L	-1.19522	-1.8214	1.00634	0.158767
PTBP3	O95758	O95758	PTBP3_HUMAN	Polypyrimidine tract-binding protein 3	0.0595073	0.399506	0.156195	0.786228
TBC1D8	O95759	O95759	TBCD8_HUMAN	TBC1 domain family member 8	-0.793718	-1.61392	0.861322	0.212985
LSM8	O95777	O95777	LSM8_HUMAN	U6 snRNA-associated Sm-like protein LSm8	0.0472991	0.32291	0.122966	0.831377
AP2A1	O95782	O95782	AP2A1_HUMAN	AP-2 complex subunit alpha-1	0.00843199	0.0506226	0.0174469	0.977473
WIZ	O95785	O95785	WIZ_HUMAN	Protein Wiz	0.228612	1.88433	1.05115	0.145007
RIGI	O95786	O95786	RIGI_HUMAN	Antiviral innate immune response receptor RIG-I	0.152327	0.571771	0.236496	0.686188
STAU1	O95793	O95793	STAU1_HUMAN	Double-stranded RNA-binding protein Staufen homolog 1	0.619298	6.13309	3.95563	0.00112
TTC4	O95801	O95801	TTC4_HUMAN	Tetratricopeptide repeat protein 4	0.150238	0.834996	0.373434	0.536483
CAVIN2	O95810	O95810	CAVN2_HUMAN	Caveolae-associated protein 2	-0.972092	-1.9778	1.11833	0.127133
BAG2	O95816	O95816	BAG2_HUMAN	BAG family molecular chaperone regulator 2	0.107602	0.24533	0.0908923	0.8754
BAG3	O95817	O95817	BAG3_HUMAN	BAG family molecular chaperone regulator 3	-0.330003	-1.97278	1.1147	0.128222
MAP4K4	O95819	O95819	M4K4_HUMAN	Mitogen-activated protein kinase kinase kinase kinase 4	1.9127	4.23158	2.75959	0.00570998
MLYCD	O95822	O95822	DCMC_HUMAN	Malonyl-CoA decarboxylase, mitochondrial	-0.1388	-0.538331	0.220314	0.706499
CRYZL1	O95825	O95825	QORL1_HUMAN	Quinone oxidoreductase-like protein 1	-0.754891	-6.41208	4.11281	0.000814815
AIFM1	O95831	O95831	AIFM1_HUMAN	Apoptosis-inducing factor 1, mitochondrial	0.318056	1.13152	0.546314	0.388746
CLDN1	O95832	O95832	CLD1_HUMAN	Claudin-1	-1.25943	-3.0995	1.94845	0.0236178
CLIC3	O95833	O95833	CLIC3_HUMAN	Chloride intracellular channel protein 3	-1.38569	-3.28566	2.08566	0.0182761
EML2	O95834	O95834	EMAL2_HUMAN	Echinoderm microtubule-associated protein-like 2	-1.33766	-3.55682	2.28326	0.0126883
NUDT14	O95848	O95848	NUD14_HUMAN	Uridine diphosphate glucose pyrophosphatase NUDT14	-0.346638	-0.890391	0.404313	0.5079
TSPAN15	O95858	O95858	TSN15_HUMAN	Tetraspanin-15	-1.03308	-2.88462	1.78898	0.032248
BPNT1	O95861	O95861	BPNT1_HUMAN	3'(2'),5'-bisphosphate nucleotidase 1	0.0217988	0.134411	0.047816	0.936517
DDAH2	O95865	O95865	DDAH2_HUMAN	N(G),N(G)-dimethylarginine dimethylaminohydrolase 2	0.174421	0.690919	0.296418	0.61691
ABHD16A	O95870	O95870	ABHGA_HUMAN	Phosphatidylserine lipase ABHD16A	0.331073	1.22302	0.603171	0.351358
TXNDC12	O95881	O95881	TXD12_HUMAN	Thioredoxin domain-containing protein 12	-0.00297507	-0.0217963	0.00742915	0.990231
SYF2	O95926	O95926	SYF2_HUMAN	Pre-mRNA-splicing factor SYF2	0.1088	0.54883	0.225364	0.700476
EFEMP2	O95967	O95967	FBLN4_HUMAN	EGF-containing fibulin-like extracellular matrix protein 2	-1.58591	-3.03518	1.90082	0.0261604
MBD3	O95983	O95983	MBD3_HUMAN	Methyl-CpG-binding domain protein 3	0.779216	3.77448	2.43953	0.00963684
TOP3B	O95985	O95985	TOP3B_HUMAN	DNA topoisomerase 3-beta-1	-0.342193	-1.42059	0.730824	0.276641
NUDT3	O95989	O95989	NUDT3_HUMAN	Diphosphoinositol polyphosphate phosphohydrolase 1	0.00667659	0.0254201	0.00867645	0.988442
FAM107A	O95990	O95990	F107A_HUMAN	Actin-associated protein FAM107A	-0.222091	-0.563077	0.232262	0.691534
AGR2	O95994	O95994	AGR2_HUMAN	Anterior gradient protein 2 homolog	-2.83977	-3.45318	2.20809	0.0145566
GAS8	O95995	O95995	DRC4_HUMAN	Dynein regulatory complex subunit 4	0.369458	0.553989	0.227856	0.697437
BCL10	O95999	O95999	BCL10_HUMAN	B-cell lymphoma/leukemia 10	0.0423017	0.302706	0.11446	0.842773
NDUFB10	O96000	O96000	NDUBA_HUMAN	NADH dehydrogenase [ubiquinone] 1 beta subcomplex subunit 10	-0.442663	-1.57137	0.832178	0.226556
CLPTM1	O96005	O96005	CLPT1_HUMAN	Putative lipid scramblase CLPTM1	0.00367125	0.0173878	0.00591645	0.992313
TOMM40	O96008	O96008	TOM40_HUMAN	Mitochondrial import receptor subunit TOM40 homolog	0.644754	3.25835	2.0656	0.0189835
PEX11B	O96011	O96011	PX11B_HUMAN	Peroxisomal membrane protein 11B	0.875049	2.77783	1.70945	0.0372338
PAK4	O96013	O96013	PAK4_HUMAN	Serine/threonine-protein kinase PAK 4	-0.274713	-1.12602	0.542946	0.391616
DNAL4	O96015	O96015	DNAL4_HUMAN	Dynein axonemal light chain 4	-0.903604	-1.21051	0.595307	0.355978
CHEK2	O96017	O96017	CHK2_HUMAN	Serine/threonine-protein kinase Chk2	0.816408	1.4067	0.721643	0.281369
ACTL6A	O96019	O96019	ACL6A_HUMAN	Actin-like protein 6A	0.371283	3.76215	2.43074	0.009794
NSD2	O96028	O96028	NSD2_HUMAN	Histone-lysine N-methyltransferase NSD2	1.85964	2.68378	1.63934	0.0435764
MT-CYB	P00156	P00156	CYB_HUMAN	Cytochrome b	-1.2176	-1.78157	0.978159	0.168296
CYB5A	P00167	P00167	CYB5_HUMAN	Cytochrome b5	-0.402531	-1.7276	0.940217	0.182024
ADH1B	P00325	P00325;P00326	ADH1B_HUMAN	All-trans-retinol dehydrogenase [NAD(+)] ADH1B	-2.37238	-5.24691	3.42591	0.00236596
ADH1C	P00326	P00326	ADH1G_HUMAN	Alcohol dehydrogenase 1C	-1.31759	-2.68734	1.642	0.0433568
LDHA	P00338	P00338	LDHA_HUMAN	L-lactate dehydrogenase A chain	-0.2212	-0.629719	0.265202	0.65403
ALDH1A1	P00352	P00352	AL1A1_HUMAN	Aldehyde dehydrogenase 1A1	-2.37389	-4.47401	2.92445	0.00446682
GLUD1	P00367	P00367;P49448;Cont_P00366	DHE3_HUMAN	Glutamate dehydrogenase 1, mitochondrial	-0.203736	-1.07043	0.509226	0.414906
CYB5R3	P00387	P00387	NB5R3_HUMAN	NADH-cytochrome b5 reductase 3	-0.256912	-1.22941	0.607199	0.3489
GSR	P00390	P00390	GSHR_HUMAN	Glutathione reductase, mitochondrial	-0.748509	-2.35387	1.39391	0.0699771
MT-CO1	P00395	P00395	COX1_HUMAN	Cytochrome c oxidase subunit 1	0.1088	0.581928	0.241467	0.680797
MT-CO2	P00403	P00403	COX2_HUMAN	Cytochrome c oxidase subunit 2	-0.465079	-1.45816	0.755779	0.264037
SOD1	P00441	P00441	SODC_HUMAN	Superoxide dismutase [Cu-Zn]	-0.726878	-2.67581	1.6334	0.0441347
CP	P00450	P00450	CERU_HUMAN	Ceruloplasmin	-0.0285985	-0.0885015	0.0309452	0.959783
PNP	P00491	P00491	PNPH_HUMAN	Purine nucleoside phosphorylase	1.66167	2.23482	1.30595	0.0839554
HPRT1	P00492	P00492	HPRT_HUMAN	Hypoxanthine-guanine phosphoribosyltransferase	-0.270361	-1.12379	0.54158	0.392487
GOT2	P00505	P00505	AATM_HUMAN	Aspartate aminotransferase, mitochondrial	-0.134152	-0.345657	0.132673	0.818705
ABL1	P00519	P00519	ABL1_HUMAN	Tyrosine-protein kinase ABL1	-1.04196	-6.16946	3.97637	0.00114754
EGFR	P00533	P00533	EGFR_HUMAN	Epidermal growth factor receptor	-0.552955	-3.77937	2.44301	0.0096106
PGK1	P00558	P00558	PGK1_HUMAN	Phosphoglycerate kinase 1	-0.121211	-0.638826	0.26979	0.648358
AK1	P00568	P00568	KAD1_HUMAN	Adenylate kinase isoenzyme 1	-1.42195	-2.80116	1.72683	0.035829
F2	P00734	P00734	THRB_HUMAN	Prothrombin	-0.963609	-1.48304	0.772425	0.254863
HP	P00738	P00738	HPT_HUMAN	Haptoglobin	-0.869549	-1.24866	0.61937	0.340903
F9	P00740	P00740	FA9_HUMAN	Coagulation factor IX	0.233177	0.435785	0.17247	0.764261
CFD	P00746	P00746	CFAD_HUMAN	Complement factor D	-1.6658	-5.5507	3.61285	0.00180645
PLG	P00747	P00747;Cont_P06868	PLMN_HUMAN	Plasminogen	-0.411005	-1.51067	0.791005	0.246479
F12	P00748	P00748	FA12_HUMAN	Coagulation factor XII	-0.870163	-1.20342	0.590862	0.358704
CFB	P00751	P00751	CFAB_HUMAN	Complement factor B	-0.38039	-1.27165	0.633995	0.331905
MT-ATP6	P00846	P00846	ATP6_HUMAN	ATP synthase subunit a	-0.212328	-0.93175	0.427809	0.487464
CA1	P00915	P00915	CAH1_HUMAN	Carbonic anhydrase 1	-0.292072	-0.292073	0.110026	0.84953
CA2	P00918	P00918	CAH2_HUMAN	Carbonic anhydrase 2	-0.775515	-1.77461	0.973248	0.169507
ASS1	P00966	P00966	ASSY_HUMAN	Argininosuccinate synthase	-0.60968	-1.4917	0.778236	0.251924
SERPINC1	P01008	P01008	ANT3_HUMAN	Antithrombin-III	-1.07173	-1.85521	1.03038	0.151085
SERPINA1	P01009	P01009	A1AT_HUMAN	Alpha-1-antitrypsin	-1.16038	-1.66982	0.899935	0.196882
SERPINA3	P01011	P01011	AACT_HUMAN	Alpha-1-antichymotrypsin	-0.764324	-1.40201	0.718551	0.283102
AGT	P01019	P01019	ANGT_HUMAN	Angiotensinogen	-1.10571	-1.84191	1.02091	0.154005
A2M	P01023	P20742;P01023	A2MG_HUMAN	Alpha-2-macroglobulin	-0.483375	-0.941141	0.433196	0.482888
C3	P01024	P01024	CO3_HUMAN	Complement C3	-0.349759	-1.18538	0.5796	0.365007
TIMP1	P01033	P01033	TIMP1_HUMAN	Metalloproteinase inhibitor 1	0.0350122	0.0729294	0.02535	0.966648
CST3	P01034	P01034	CYTC_HUMAN	Cystatin-C	0.0491777	0.140484	0.0500896	0.93297
CSTA	P01040	P01040	CYTA_HUMAN	Cystatin-A	-0.149882	-0.317361	0.120619	0.834098
KNG1	P01042	P01042	KNG1_HUMAN	Kininogen-1	-0.787927	-1.43028	0.73724	0.273273
NRAS	P01111	P01111;P01112	RASN_HUMAN	GTPase NRas	0.260646	3.85647	2.49778	0.00859218
HRAS	P01112	P01112	RASH_HUMAN	GTPase HRas	-0.0129778	-0.0198587	0.00676367	0.991161
KRAS	P01116	P01116;P01112	RASK_HUMAN	GTPase KRas	-0.124647	-0.69735	0.299751	0.613836
JCHAIN	P01591	P01591	IGJ_HUMAN	Immunoglobulin J chain	-1.40812	-1.6485	0.885168	0.202709
IGKV3-20	P01619	P01619	KV320_HUMAN	Immunoglobulin kappa variable 3-20	-0.953905	-1.71468	0.931178	0.185493
IGKV3-15	P01624	A0A075B6H7;A0A0C4DH90;A0A0C4DH55;P01624	KV315_HUMAN	Immunoglobulin kappa variable 3-15	0.418078	0.470694	0.188453	0.744761
IGLV1-47	P01700	P01700	LV147_HUMAN	Immunoglobulin lambda variable 1-47	-0.964603	-1.57046	0.831554	0.226693
IGHV3-7	P01780	P01780	HV307_HUMAN	Immunoglobulin heavy variable 3-7	-0.677816	-1.3737	0.699965	0.293862
PIGR	P01833	P01833	PIGR_HUMAN	Polymeric immunoglobulin receptor	-0.976995	-0.913085	0.417159	0.496927
IGKC	P01834	P01834	IGKC_HUMAN	Immunoglobulin kappa constant	-0.823996	-1.38593	0.707982	0.28885
IGHG1	P01857	P01859;P01857	IGHG1_HUMAN	Immunoglobulin heavy constant gamma 1	-0.800782	-1.24103	0.614541	0.344937
IGHG2	P01859	P01859	IGHG2_HUMAN	Immunoglobulin heavy constant gamma 2	-1.15274	-1.53408	0.806826	0.238806
IGHG3	P01860	P01860	IGHG3_HUMAN	Immunoglobulin heavy constant gamma 3	-0.73131	-1.36818	0.696353	0.295776
IGHG4	P01861	P01861	IGHG4_HUMAN	Immunoglobulin heavy constant gamma 4	-0.73484	-1.15672	0.561816	0.378647
IGHM	P01871	P01871	IGHM_HUMAN	Immunoglobulin heavy constant mu	-0.521054	-0.880528	0.398765	0.51309
IGHA1	P01876	P01877;P01876	IGHA1_HUMAN	Immunoglobulin heavy constant alpha 1	-1.16783	-1.78253	0.978834	0.16819
IGHA2	P01877	P01877	IGHA2_HUMAN	Immunoglobulin heavy constant alpha 2	-1.29053	-1.64304	0.881388	0.204039
HLA-B	P01889	P01889;P04439	HLAB_HUMAN	HLA class I histocompatibility antigen, B alpha chain	0.540309	1.11454	0.535934	0.395795
HLA-DRA	P01903	P01903;P01906	DRA_HUMAN	HLA class II histocompatibility antigen, DR alpha chain	-0.478959	-1.02952	0.484801	0.434733
HLA-DRB1	P01911	P01911	DRB1_HUMAN	HLA class II histocompatibility antigen, DRB1 beta chain	-0.543328	-1.45581	0.754215	0.26476
HBD	P02042	P02042	HBD_HUMAN	Hemoglobin subunit delta	-0.455554	-0.405553	0.158883	0.783215
MB	P02144	P02144	MYG_HUMAN	Myoglobin	-1.07961	-1.87469	1.04427	0.14695
COL1A1	P02452	P02452	CO1A1_HUMAN	Collagen alpha-1(I) chain	-3.08944	-7.25062	4.55964	0.000761905
COL3A1	P02461	P02461	CO3A1_HUMAN	Collagen alpha-1(III) chain	-3.49992	-3.65054	2.35083	0.0112732
COL4A1	P02462	P02462;P29400	CO4A1_HUMAN	Collagen alpha-1(IV) chain	-1.3219	-4.88496	3.1957	0.00308091
CRYAB	P02511	P02511	CRYAB_HUMAN	Alpha-crystallin B chain	-0.669158	-1.65027	0.88639	0.202123
LMNA	P02545	P02545	LMNA_HUMAN	Prelamin-A/C	-0.751755	-2.37561	1.41002	0.0676085
APOA1	P02647	P02647	APOA1_HUMAN	Apolipoprotein A-I	-0.897435	-1.41651	0.728122	0.278299
APOE	P02649	P02649	APOE_HUMAN	Apolipoprotein E	-0.110577	-0.288033	0.108349	0.8515
APOA2	P02652	P02652	APOA2_HUMAN	Apolipoprotein A-II	-0.598526	-1.22314	0.603245	0.351363
APOC3	P02656	P02656	APOC3_HUMAN	Apolipoprotein C-III	-0.283664	-0.758798	0.332097	0.577538
FGA	P02671	P02671	FIBA_HUMAN	Fibrinogen alpha chain	-0.549609	-1.05362	0.499145	0.422813
FGB	P02675	P02675	FIBB_HUMAN	Fibrinogen beta chain	-0.563341	-1.04831	0.495976	0.425567
FGG	P02679	P02679	FIBG_HUMAN	Fibrinogen gamma chain	-0.640462	-1.12518	0.542429	0.391871
MBP	P02686	P02686	MBP_HUMAN	Myelin basic protein	-0.778792	-1.54383	0.813435	0.235603
APCS	P02743	P02743	SAMP_HUMAN	Serum amyloid P-component	-0.930401	-1.79382	0.986805	0.165575
C1QB	P02746	P02746	C1QB_HUMAN	Complement C1q subcomponent subunit B	-0.486848	-1.3697	0.697346	0.295355
C1QC	P02747	P02747	C1QC_HUMAN	Complement C1q subcomponent subunit C	-0.196933	-0.215588	0.0790201	0.892671
C9	P02748	P02748;Cont_Q3MHN2	CO9_HUMAN	Complement component C9	-0.676636	-1.34484	0.681138	0.304239
APOH	P02749	P02749	APOH_HUMAN	Beta-2-glycoprotein 1	-0.351604	-0.945821	0.435887	0.480363
LRG1	P02750	P02750	A2GL_HUMAN	Leucine-rich alpha-2-glycoprotein	-0.675067	-1.05904	0.502394	0.420629
FN1	P02751	P02751;Cont_P07589	FINC_HUMAN	Fibronectin	-0.222958	-0.438359	0.173637	0.763148
RBP4	P02753	P02753;Cont_P18902	RET4_HUMAN	Retinol-binding protein 4	-0.821832	-2.23182	1.30374	0.0843635
AMBP	P02760	P02760	AMBP_HUMAN	Protein AMBP	-1.22803	-3.69709	2.38424	0.0106584
ORM1	P02763	P02763	A1AG1_HUMAN	Alpha-1-acid glycoprotein 1	-1.28912	-1.54724	0.815752	0.234483
AHSG	P02765	P02765	FETUA_HUMAN	Alpha-2-HS-glycoprotein	-1.13142	-1.75509	0.959505	0.17455
TTR	P02766	P02766	TTHY_HUMAN	Transthyretin	-1.13402	-2.25525	1.32101	0.0814866
ALB	P02768	P02768	ALBU_HUMAN	Albumin	-1.16427	-2.02692	1.15388	0.116919
GC	P02774	P02774	VTDB_HUMAN	Vitamin D-binding protein	-0.921886	-1.92407	1.07963	0.13736
TFRC	P02786	P02786	TFR1_HUMAN	Transferrin receptor protein 1	2.36756	3.85511	2.49681	0.00865272
TF	P02787	P02787	TRFE_HUMAN	Serotransferrin	-0.727329	-1.71374	0.930524	0.185595
LTF	P02788	P02788;Cont_Q29443	TRFL_HUMAN	Lactotransferrin	-1.74028	-1.6712	0.900896	0.196476
HPX	P02790	P02790	HEMO_HUMAN	Hemopexin	-1.07054	-2.11122	1.21526	0.102251
FTL	P02792	P02792	FRIL_HUMAN	Ferritin light chain	-0.439476	-0.761625	0.333607	0.575803
FTH1	P02794	P02794	FRIH_HUMAN	Ferritin heavy chain	-0.337247	-0.437451	0.173225	0.763686
ESR1	P03372	P03372	ESR1_HUMAN	Estrogen receptor	-1.17313	-2.67732	1.63453	0.0440425
MT-ND1	P03886	P03886	NU1M_HUMAN	NADH-ubiquinone oxidoreductase chain 1	-0.678794	-1.52	0.797302	0.243393
MT-ND2	P03891	P03891	NU2M_HUMAN	NADH-ubiquinone oxidoreductase chain 2	-0.218199	-0.372084	0.144121	0.80354
MT-ND4	P03905	P03905	NU4M_HUMAN	NADH-ubiquinone oxidoreductase chain 4	-0.601476	-1.93099	1.0846	0.135975
C4BPA	P04003	P04003	C4BPA_HUMAN	C4b-binding protein alpha chain	0.365346	0.597602	0.249189	0.671826
VTN	P04004	P04004	VTNC_HUMAN	Vitronectin	-0.260607	-0.602717	0.251722	0.668377
CAT	P04040	P04040	CATA_HUMAN	Catalase	-1.39032	-4.81848	3.15253	0.00323926
GBA1	P04062	P04062	GBA1_HUMAN	Lysosomal acid glucosylceramidase	0.139311	0.786293	0.346858	0.562925
FUCA1	P04066	P04066	FUCO_HUMAN	Tissue alpha-L-fucosidase	-0.47668	-2.22475	1.29853	0.0851447
ALDOA	P04075	P04075	ALDOA_HUMAN	Fructose-bisphosphate aldolase A	-0.208971	-0.972836	0.451514	0.464446
CSTB	P04080	P04080	CYTB_HUMAN	Cystatin-B	-0.300663	-1.88918	1.05462	0.144003
ANXA1	P04083	P04083	ANXA1_HUMAN	Annexin A1	-0.677903	-1.08458	0.517751	0.408882
APOB	P04114	P04114	APOB_HUMAN	Apolipoprotein B-100	-0.414053	-0.623652	0.262158	0.65755
NR3C1	P04150	P04150	GCR_HUMAN	Glucocorticoid receptor	-0.523022	-1.31074	0.659063	0.316932
PRNP	P04156	P04156	PRIO_HUMAN	Major prion protein	-0.528073	-1.42218	0.731874	0.276224
SOD2	P04179	P04179	SODM_HUMAN	Superoxide dismutase [Mn], mitochondrial	-0.510432	-1.43057	0.737432	0.273216
OAT	P04181	P04181	OAT_HUMAN	Ornithine aminotransferase, mitochondrial	0.939986	2.33412	1.37928	0.0721617
HRG	P04196	P04196	HRG_HUMAN	Histidine-rich glycoprotein	-0.81093	-1.63636	0.876778	0.206012
THY1	P04216	P04216	THY1_HUMAN	Thy-1 membrane glycoprotein	-0.771475	-1.11926	0.538813	0.394366
A1BG	P04217	P04217	A1BG_HUMAN	Alpha-1B-glycoprotein	-1.36499	-1.69431	0.916966	0.190706
CD74	P04233	P04233	HG2A_HUMAN	HLA class II histocompatibility antigen gamma chain	-0.659317	-2.16258	1.25286	0.0938204
TUBB4A	P04350	P04350	TBB4A_HUMAN	Tubulin beta-4A chain	0.108666	0.165162	0.05943	0.918747
GAPDH	P04406	P04406	G3P_HUMAN	Glyceraldehyde-3-phosphate dehydrogenase	-0.239365	-2.03086	1.15674	0.116066
ASL	P04424	P04424	ARLY_HUMAN	Argininosuccinate lyase	0.125584	0.298186	0.112571	0.845584
HLA-A	P04439	P04439	HLAA_HUMAN	HLA class I histocompatibility antigen, A alpha chain	0.528885	1.36672	0.695397	0.296444
ERBB2	P04626	P04626	ERBB2_HUMAN	Receptor tyrosine-protein kinase erbB-2	-0.420923	-4.1362	2.69378	0.0062069
CAPNS1	P04632	P04632	CPNS1_HUMAN	Calpain small subunit 1	-1.12665	-7.07479	4.469	0.000777778
TP53	P04637	P04637	P53_HUMAN	Cellular tumor antigen p53	2.63583	3.76765	2.43466	0.00969935
HSPB1	P04792	P04792	HSPB1_HUMAN	Heat shock protein beta-1	-0.726965	-1.95782	1.10391	0.130757
RPN1	P04843	P04843	RPN1_HUMAN	Dolichyl-diphosphooligosaccharide--protein glycosyltransferase subunit 1	-0.0523531	-0.261549	0.0974655	0.867568
RPN2	P04844	P04844	RPN2_HUMAN	Dolichyl-diphosphooligosaccharide--protein glycosyltransferase subunit 2	-0.291932	-1.55383	0.820233	0.232395
GNAI2	P04899	P04899	GNAI2_HUMAN	Guanine nucleotide-binding protein G(i) subunit alpha-2	-0.35995	-2.06565	1.18203	0.10982
SLC4A2	P04920	P04920;P48751	B3A2_HUMAN	Anion exchange protein 2	-0.746982	-3.62478	2.3323	0.0116184
ATP1A1	P05023	P05023	AT1A1_HUMAN	Sodium/potassium-transporting ATPase subunit alpha-1	0.0494599	0.201293	0.073398	0.900563
ATP1B1	P05026	P05026	AT1B1_HUMAN	Sodium/potassium-transporting ATPase subunit beta-1	-0.396296	-1.29031	0.645929	0.324614
APP	P05067	P05067	A4_HUMAN	Amyloid-beta precursor protein	0.199888	0.594367	0.24759	0.673946
ARG1	P05089	P05089	ARGI1_HUMAN	Arginase-1	0.602812	0.973496	0.451898	0.464152
APOD	P05090	P05090	APOD_HUMAN	Apolipoprotein D	-0.907048	-1.11285	0.534903	0.396354
ALDH2	P05091	P05091;O94788	ALDH2_HUMAN	Aldehyde dehydrogenase, mitochondrial	-0.610719	-1.27762	0.637805	0.32962
ITGB2	P05107	P05107	ITB2_HUMAN	Integrin beta-2	-0.387731	-0.743609	0.324018	0.587057
S100A8	P05109	P05109	S10A8_HUMAN	Protein S100-A8	-0.939068	-1.03697	0.489222	0.43112
HMGN1	P05114	P05114	HMGN1_HUMAN	Non-histone chromosomal protein HMG-14	-0.547156	-3.29231	2.09053	0.0181992
SLC25A5	P05141	P05141;P12236;P12235;Q9H0C2	ADT2_HUMAN	ADP/ATP translocase 2	1.18652	5.38183	3.50964	0.00214085
SERPING1	P05155	P05155	IC1_HUMAN	Plasma protease C1 inhibitor	-0.294328	-0.545791	0.223899	0.701853
CFI	P05156	P05156	CFAI_HUMAN	Complement factor I	-0.304631	-0.822601	0.366619	0.543691
ISG15	P05161	P05161	ISG15_HUMAN	Ubiquitin-like protein ISG15	1.25889	3.11678	1.96123	0.0231786
MPO	P05164	P05164	PERM_HUMAN	Myeloperoxidase	-0.89981	-1.0434	0.49305	0.428267
PCCA	P05165	P05165	PCCA_HUMAN	Propionyl-CoA carboxylase alpha chain, mitochondrial	-0.639752	-1.88013	1.04815	0.146043
PCCB	P05166	P05166	PCCB_HUMAN	Propionyl-CoA carboxylase beta chain, mitochondrial	-0.662202	-1.77799	0.975627	0.168969
ALPL	P05186	P05186	PPBT_HUMAN	Alkaline phosphatase, tissue-nonspecific isozyme	2.11016	4.1296	2.6892	0.00628767
EIF2S1	P05198	P05198	IF2A_HUMAN	Eukaryotic translation initiation factor 2 subunit 1	0.31479	2.41155	1.43668	0.0641346
ICAM1	P05362	P05362	ICAM1_HUMAN	Intercellular adhesion molecule 1	1.45697	3.93413	2.55263	0.00779259
RPLP1	P05386	P05386	RLA1_HUMAN	Large ribosomal subunit protein P1	-0.435124	-3.54682	2.27603	0.0128721
RPLP2	P05387	P05387	RLA2_HUMAN	Large ribosomal subunit protein P2	-0.40367	-3.54528	2.27492	0.0128978
RPLP0	P05388	P05388	RLA0_HUMAN	Large ribosomal subunit protein uL10	-0.412918	-4.01753	2.61116	0.00728205
JUN	P05412	P05412	JUN_HUMAN	Transcription factor Jun	0.644249	1.85315	1.02891	0.151467
FABP3	P05413	P05413	FABPH_HUMAN	Fatty acid-binding protein, heart	-0.0607407	-0.111662	0.039386	0.948569
POLR3D	P05423	P05423	RPC4_HUMAN	DNA-directed RNA polymerase III subunit RPC4	-0.118494	-0.517057	0.210167	0.718348
CLEC3B	P05452	P05452;Cont_Q2KIS7	TETN_HUMAN	Tetranectin	-0.591751	-2.39291	1.42285	0.065954
SSB	P05455	P05455	LA_HUMAN	Lupus La protein	0.160371	0.900437	0.409986	0.502941
SERPIND1	P05546	P05546	HEP2_HUMAN	Heparin cofactor 2	-0.710511	-1.64781	0.884685	0.202828
ITGB1	P05556	P05556	ITB1_HUMAN	Integrin beta-1	-0.0477472	-0.257941	0.0959971	0.869271
COL5A2	P05997	P05997	CO5A2_HUMAN	Collagen alpha-2(V) chain	-1.43449	-3.75855	2.42817	0.00983139
UROD	P06132	P06132	DCUP_HUMAN	Uroporphyrinogen decarboxylase	-0.132321	-0.573951	0.237561	0.685095
INSR	P06213	P06213	INSR_HUMAN	Insulin receptor	-0.728612	-3.62811	2.3347	0.0115608
FYN	P06241	P06241	FYN_HUMAN	Tyrosine-protein kinase Fyn	-0.751143	-2.01685	1.14658	0.11905
GLA	P06280	P06280	AGAL_HUMAN	Alpha-galactosidase A	-0.436181	-1.48543	0.774023	0.254038
IGKV4-1	P06312	P06312	KV401_HUMAN	Immunoglobulin kappa variable 4-1	-0.902528	-1.25236	0.62172	0.339398
GSN	P06396	P06396;Cont_Q3SX14	GELS_HUMAN	Gelsolin	-0.568876	-1.09902	0.526492	0.402383
RB1	P06400	P06400	RB_HUMAN	Retinoblastoma-associated protein	0.45446	1.20366	0.591016	0.358646
PGR	P06401	P06401	PRGR_HUMAN	Progesterone receptor	0.145866	0.311309	0.118069	0.83808
PTMA	P06454	P06454	PTMA_HUMAN	Prothymosin alpha	-0.05065	-0.219918	0.080734	0.890599
CDK1	P06493	P06493	CDK1_HUMAN	Cyclin-dependent kinase 1	3.32556	7.73919	4.80348	0.000163265
ATP5F1B	P06576	P06576	ATPB_HUMAN	ATP synthase subunit beta, mitochondrial	0.357284	1.68288	0.909011	0.194191
C2	P06681	P06681	CO2_HUMAN	Complement C2	-0.0772615	-0.198041	0.0721265	0.902378
S100A9	P06702	P06702	S10A9_HUMAN	Protein S100-A9	-0.877912	-1.15436	0.560364	0.379666
S100A6	P06703	P06703	S10A6_HUMAN	Protein S100-A6	0.19674	0.528568	0.215643	0.712162
APOA4	P06727	P06727	APOA4_HUMAN	Apolipoprotein A-IV	-0.830294	-1.64728	0.884322	0.202949
EIF4E	P06730	P06730	IF4E_HUMAN	Eukaryotic translation initiation factor 4E	-0.401562	-1.58958	0.844621	0.220629
CKM	P06732	P06732	KCRM_HUMAN	Creatine kinase M-type	-0.162617	-0.719537	0.311327	0.601042
ENO1	P06733	P06733	ENOA_HUMAN	Alpha-enolase	0.237621	1.19273	0.584178	0.362501
PYGL	P06737	P06737	PYGL_HUMAN	Glycogen phosphorylase, liver form	0.287588	0.883927	0.400674	0.511414
GPI	P06744	P06744	G6PI_HUMAN	Glucose-6-phosphate isomerase	-0.0218941	-0.0479322	0.0165027	0.978559
POLB	P06746	P06746	DPOLB_HUMAN	DNA polymerase beta	0.0480033	0.375698	0.145701	0.80138
NPM1	P06748	P06748	NPM_HUMAN	Nucleophosmin	-0.0605252	-0.277974	0.104194	0.857755
TPM3	P06753	P06753	TPM3_HUMAN	Tropomyosin alpha-3 chain	0.705274	2.78819	1.71717	0.0365275
ITGAV	P06756	P06756	ITAV_HUMAN	Integrin alpha-V	0.10605	0.48636	0.195728	0.736029
HEXA	P06865	P06865	HEXA_HUMAN	Beta-hexosaminidase subunit alpha	-0.113537	-0.422285	0.166373	0.772276
SERPINE2	P07093	P07093	GDN_HUMAN	Glia-derived nexin	0.0477874	0.21088	0.0771623	0.895579
EPHX1	P07099	P07099	HYEP_HUMAN	Epoxide hydrolase 1	0.610568	1.55961	0.824167	0.230379
DBI	P07108	P07108	ACBP_HUMAN	Acyl-CoA-binding protein	-0.247125	-1.28646	0.643462	0.326001
LDHB	P07195	P07195;P07864;Q6ZMR3;P00338;Cont_Q5E9B1	LDHB_HUMAN	L-lactate dehydrogenase B chain	-0.207276	-0.644352	0.272583	0.644743
CENPB	P07199	P07199	CENPB_HUMAN	Major centromere autoantigen B	-0.0193705	-0.129076	0.0458267	0.939802
GPX1	P07203	P07203	GPX1_HUMAN	Glutathione peroxidase 1	0.0224152	0.103625	0.0364408	0.953269
PGK2	P07205	P07205	PGK2_HUMAN	Phosphoglycerate kinase 2	-0.0042692	-0.0296232	0.0101275	0.986044
PROS1	P07225	P07225	PROS_HUMAN	Vitamin K-dependent protein S	-0.824218	-1.90127	1.06328	0.141928
P4HB	P07237	P07237	PDIA1_HUMAN	Protein disulfide-isomerase	0.0189725	0.0807409	0.0281487	0.96384
H1-0	P07305	P07305	H10_HUMAN	Histone H1.0	-2.02289	-20.4444	8.76171	0
ACYP1	P07311	P07311	ACYP1_HUMAN	Acylphosphatase-1	-0.634257	-3.86795	2.5059	0.00839888
CRYGA;CRYGB;CRYGC	P07315;P07316;P11844	P07315;P11844;P07316	CRGA_HUMAN;CRGB_HUMAN;CRGC_HUMAN	Gamma-crystallin C	0.405476	0.91482	0.418146	0.496397
FES	P07332	P16591;P07332	FES_HUMAN	Tyrosine-protein kinase Fes/Fps	-0.9812	-2.71657	1.66379	0.0413145
CTSD	P07339	P07339	CATD_HUMAN	Cathepsin D	-0.382266	-0.870824	0.393328	0.518311
ANXA2	P07355	P07355;A6NMY6	ANXA2_HUMAN	Annexin A2	-0.868455	-3.81493	2.46831	0.00914363
C8A	P07357	P07357	CO8A_HUMAN	Complement component C8 alpha chain	-0.955326	-1.68811	0.912644	0.192536
C8B	P07358	P07358	CO8B_HUMAN	Complement component C8 beta chain	-0.722845	-1.78107	0.9778	0.168334
C8G	P07360	P07360	CO8G_HUMAN	Complement component C8 gamma chain	-0.496024	-0.788095	0.347832	0.562168
CAPN1	P07384	P07384	CAN1_HUMAN	Calpain-1 catalytic subunit	-0.991352	-5.55978	3.61836	0.00181622
DCN	P07585	P07585	PGS2_HUMAN	Decorin	-4.08407	-5.02941	3.28856	0.00263309
PSAP	P07602	P07602	SAP_HUMAN	Prosaposin	-0.455159	-1.30067	0.652585	0.321045
HEXB	P07686	P07686	HEXB_HUMAN	Beta-hexosaminidase subunit beta	-0.0792558	-0.216102	0.0792232	0.892329
CTSL	P07711	P07711	CATL1_HUMAN	Procathepsin L	-0.783098	-2.23074	1.30295	0.0844407
PFN1	P07737	P07737;Cont_P02584	PROF1_HUMAN	Profilin-1	-0.066767	-0.436799	0.172929	0.76399
BPGM	P07738	P07738	PMGE_HUMAN	Bisphosphoglycerate mutase	0.0265445	0.0525957	0.0181407	0.977216
APRT	P07741	P07741	APT_HUMAN	Adenine phosphoribosyltransferase	-1.21791	-3.6986	2.38531	0.0106501
EPRS1	P07814	P07814	SYEP_HUMAN	Bifunctional glutamate/proline--tRNA ligase	0.191256	1.57268	0.833073	0.22622
CTSB	P07858	P07858	CATB_HUMAN	Cathepsin B	0.331478	1.61181	0.859873	0.21366
HSP90AA1	P07900	P07900	HS90A_HUMAN	Heat shock protein HSP 90-alpha	-0.00541743	-0.0448234	0.015414	0.979561
GALT	P07902	P07902	GALT_HUMAN	Galactose-1-phosphate uridylyltransferase	-0.692214	-1.32339	0.667233	0.313215
HNRNPC	P07910	P07910	HNRPC_HUMAN	Heterogeneous nuclear ribonucleoproteins C1/C2	0.0986281	1.40601	0.721193	0.281562
UQCRH	P07919	P07919	QCR6_HUMAN	Cytochrome b-c1 complex subunit 6, mitochondrial	-0.39037	-0.671146	0.286233	0.628457
LAMB1	P07942	P07942	LAMB1_HUMAN	Laminin subunit beta-1	0.65506	1.35457	0.68747	0.300478
YES1	P07947	P12931;P07947;P06241	YES_HUMAN	Tyrosine-protein kinase Yes	0.0117598	0.0977153	0.0342861	0.955383
LYN	P07948	P08631;P07948	LYN_HUMAN	Tyrosine-protein kinase Lyn	0.0142839	0.0519159	0.0179015	0.977197
FH	P07954	P07954	FUMH_HUMAN	Fumarate hydratase, mitochondrial	0.976195	2.58397	1.56495	0.0505215
ZFX;ZFY	P08048;P17010	P08048;P17010	ZFX_HUMAN;ZFY_HUMAN	Zinc finger Y-chromosomal protein	-0.598758	-2.20133	1.28131	0.0882525
IGF1R	P08069	P08069	IGF1R_HUMAN	Insulin-like growth factor 1 receptor	-0.507999	-4.68897	3.06764	0.00371739
COL1A2	P08123	P08123;Cont_P02465	CO1A2_HUMAN	Collagen alpha-2(I) chain	-3.01924	-7.22575	4.54692	0.000738462
ANXA6	P08133	P08133	ANXA6_HUMAN	Annexin A6	-1.35405	-3.43776	2.19687	0.0149361
RHOC	P08134	P08134	RHOC_HUMAN	Rho-related GTP-binding protein RhoC	0.658624	3.02227	1.89125	0.026586
CD55	P08174	P08174	DAF_HUMAN	Complement decay-accelerating factor	0.0189577	0.15021	0.0537515	0.92707
SLC3A2	P08195	P08195	4F2_HUMAN	4F2 cell-surface antigen heavy chain	0.34599	1.25032	0.620423	0.340178
GUSB	P08236	P08236	BGLR_HUMAN	Beta-glucuronidase	-0.246543	-0.862024	0.388415	0.522918
PFKM	P08237	P08237	PFKAM_HUMAN	ATP-dependent 6-phosphofructokinase, muscle type	-0.034553	-0.128153	0.0454834	0.940284
HSP90AB1	P08238	P08238	HS90B_HUMAN	Heat shock protein HSP 90-beta	0.660649	4.22422	2.75453	0.00566667
SRPRA	P08240	P08240	SRPRA_HUMAN	Signal recognition particle receptor subunit alpha	-0.100829	-0.627506	0.264091	0.654847
ASNS	P08243	P08243	ASNS_HUMAN	Asparagine synthetase [glutamine-hydrolyzing]	1.99261	8.23272	5.0385	0.000117647
GSTA1	P08263	P08263;Q7RTV2	GSTA1_HUMAN	Glutathione S-transferase A1	-1.06788	-1.1541	0.560201	0.379745
SOD3	P08294	P08294	SODE_HUMAN	Extracellular superoxide dismutase [Cu-Zn]	-1.95596	-3.53931	2.2706	0.0130133
HMBS	P08397	P08397	HEM3_HUMAN	Porphobilinogen deaminase	-0.231901	-1.19377	0.58483	0.362119
PDHA1	P08559	P08559;P29803	ODPA_HUMAN	Pyruvate dehydrogenase E1 component subunit alpha, somatic form, mitochondrial	0.331191	1.04743	0.495449	0.426123
CD14	P08571	P08571	CD14_HUMAN	Monocyte differentiation antigen CD14	-1.38174	-2.46711	1.47796	0.0594916
COL4A2	P08572	P08572	CO4A2_HUMAN	Collagen alpha-2(IV) chain	-1.61356	-4.8773	3.19075	0.00304153
CYC1	P08574	P08574	CY1_HUMAN	Cytochrome c1, heme protein, mitochondrial	-0.00296474	-0.0068225	0.00231196	0.99669
PTPRC	P08575	P08575	PTPRC_HUMAN	Receptor-type tyrosine-protein phosphatase C	-0.572799	-1.09474	0.523899	0.404104
SNRPB2	P08579	P08579	RU2B_HUMAN	U2 small nuclear ribonucleoprotein B''	0.106744	1.24256	0.615505	0.344218
CFH	P08603	P08603	CFAH_HUMAN	Complement factor H	-0.383596	-0.950099	0.438351	0.477897
SNRNP70	P08621	P08621	RU17_HUMAN	U1 small nuclear ribonucleoprotein 70 kDa	0.0203251	0.138599	0.0493828	0.933496
FCGR3A	P08637	P08637	FCG3A_HUMAN	Low affinity immunoglobulin gamma Fc region receptor III-A	-0.778883	-4.74974	3.1076	0.00339601
NFIC	P08651	Q14938;Q12857;O00712;P08651	NFIC_HUMAN	Nuclear factor 1 C-type	-0.490386	-2.35948	1.39806	0.0692867
VIM	P08670	P08670	VIME_HUMAN	Vimentin	-1.00422	-2.26128	1.32545	0.080719
RPS17	P08708	P08708	RS17_HUMAN	Small ribosomal subunit protein eS17	-0.353839	-4.16168	2.71141	0.00598243
GNAI3	P08754	P08754	GNAI3_HUMAN	Guanine nucleotide-binding protein G(i) subunit alpha-3	0.0532412	0.357112	0.137613	0.812102
ANXA5	P08758	P08758	ANXA5_HUMAN	Annexin A5	-1.11756	-3.10205	1.95034	0.0235021
RPSA	P08865	A0A8I5KQE6;P08865	RSSA_HUMAN	Small ribosomal subunit protein uS2	-0.430645	-5.1108	3.3403	0.00248062
CD63	P08962	P08962	CD63_HUMAN	CD63 antigen	0.171937	0.467462	0.18696	0.746856
MRPL3	P09001	P09001	RM03_HUMAN	Large ribosomal subunit protein uL3m	0.118814	0.739926	0.322067	0.588344
SNRPA	P09012	P09012	SNRPA_HUMAN	U1 small nuclear ribonucleoprotein A	0.0220942	0.215231	0.0788789	0.892825
FGF2	P09038	P09038	FGF2_HUMAN	Fibroblast growth factor 2	-3.08239	-6.89102	4.37258	0.000727273
ENO2	P09104	P09104	ENOG_HUMAN	Gamma-enolase	0.419082	1.25788	0.625226	0.336867
ACAA1	P09110	P09110	THIK_HUMAN	3-ketoacyl-CoA thiolase, peroxisomal	0.743348	2.98391	1.86278	0.0280518
SRP19	P09132	P09132	SRP19_HUMAN	Signal recognition particle 19 kDa protein	0.270798	0.73182	0.317785	0.59314
GSTA2	P09210	P08263;P09210;Q7RTV2;Q16772	GSTA2_HUMAN	Glutathione S-transferase A2	-4.00998	-5.0786	3.31988	0.00258113
GSTP1	P09211	P09211	GSTP1_HUMAN	Glutathione S-transferase P	-0.802706	-4.2173	2.74977	0.00570166
SNRPC	P09234	P09234	RU1C_HUMAN	U1 small nuclear ribonucleoprotein C	-0.0142802	-0.0808567	0.0281903	0.963881
LGALS1	P09382	P09382	LEG1_HUMAN	Galectin-1	-0.346883	-0.989127	0.461012	0.455808
QDPR	P09417	P09417	DHPR_HUMAN	Dihydropteridine reductase	-0.808254	-2.28003	1.33929	0.0781832
HMGB1	P09429	P09429	HMGB1_HUMAN	High mobility group protein B1	-0.32906	-1.74095	0.949574	0.178525
RBP1	P09455	P09455	RET1_HUMAN	Retinol-binding protein 1	-0.463631	-1.01559	0.476559	0.441508
FBP1	P09467	O00757;P09467	F16P1_HUMAN	Fructose-1,6-bisphosphatase 1	-2.50953	-5.07973	3.32059	0.00256061
GNAO1	P09471	P09471	GNAO_HUMAN	Guanine nucleotide-binding protein G(o) subunit alpha	-0.765315	-1.0955	0.524357	0.403872
TPM1	P09493	P09493;P06753	TPM1_HUMAN	Tropomyosin alpha-1 chain	-0.105819	-0.369776	0.143114	0.804675
CLTA	P09496	P09496	CLCA_HUMAN	Clathrin light chain A	-0.166639	-1.29084	0.646273	0.32464
CLTB	P09497	P09497	CLCB_HUMAN	Clathrin light chain B	-0.152273	-0.741763	0.32304	0.587628
ANXA4	P09525	P09525	ANXA4_HUMAN	Annexin A4	-1.09672	-6.30467	4.05283	0.00110714
CNP	P09543	P09543	CN37_HUMAN	2',3'-cyclic-nucleotide 3'-phosphodiesterase	-0.0707255	-0.469467	0.187886	0.745584
PDGFRB	P09619	P09619	PGFRB_HUMAN	Platelet-derived growth factor receptor beta	-1.54422	-2.22476	1.29854	0.085184
DLD	P09622	P09622	DLDH_HUMAN	Dihydrolipoyl dehydrogenase, mitochondrial	0.644224	2.82918	1.74771	0.034653
HNRNPA1	P09651	P09651	ROA1_HUMAN	Heterogeneous nuclear ribonucleoprotein A1	0.314916	2.18033	1.26588	0.0909812
SNRPA1	P09661	P09661	RU2A_HUMAN	U2 small nuclear ribonucleoprotein A'	0.149136	1.45036	0.75058	0.266514
CTSH	P09668	P09668	CATH_HUMAN	Pro-cathepsin H	-0.724606	-2.58103	1.56276	0.0506831
COX6C	P09669	P09669	COX6C_HUMAN	Cytochrome c oxidase subunit 6C	-0.562616	-1.48647	0.774721	0.253799
TACSTD2	P09758	P09758	TACD2_HUMAN	Tumor-associated calcium signal transducer 2	0.943821	3.2898	2.08869	0.0182605
C1S	P09871	P09871	C1S_HUMAN	Complement C1s subcomponent	-0.560865	-1.92591	1.08095	0.136979
PARP1	P09874	P09874	PARP1_HUMAN	Poly [ADP-ribose] polymerase 1	0.798831	3.81366	2.46741	0.00916599
IFIT2	P09913	P09913	IFIT2_HUMAN	Interferon-induced protein with tetratricopeptide repeats 2	-1.98939	-3.49399	2.23775	0.0135811
IFIT1	P09914	P09914	IFIT1_HUMAN	Interferon-induced protein with tetratricopeptide repeats 1	-0.341185	-0.626771	0.263722	0.655329
UCHL1	P09936	P09936	UCHL1_HUMAN	Ubiquitin carboxyl-terminal hydrolase isozyme L1	1.79255	1.33457	0.674471	0.308106
LTA4H	P09960	P09960	LKHA4_HUMAN	Leukotriene A-4 hydrolase	-0.955597	-5.76341	3.74039	0.001325
ALDOC	P09972	P09972	ALDOC_HUMAN	Fructose-bisphosphate aldolase C	-0.517469	-3.07453	1.92998	0.0244607
C4A	P0C0L4	P0C0L4;Cont_P01030	CO4A_HUMAN	Complement C4-A	-0.695614	-1.40798	0.722487	0.280938
C4B_2	P0C0L5	P0C0L4;P0C0L5;Cont_P01030	CO4B_HUMAN	Complement C4-B	-0.432742	-1.14168	0.552551	0.384567
H2AZ1;H2AZ2	P0C0S5;Q71UI9	P0C0S5;Q71UI9	H2AV_HUMAN;H2AZ_HUMAN	Histone H2A.Z	-0.089006	-0.548626	0.225266	0.700508
H2AC12;H2AC14;H2AC17;H2AC7	P0C0S8;P20671;Q96KK5;Q99878	P0C0S8;P04908;Q6FI13;P20671;Q9BTM1;Q99878;Q7L7L0;Q93077;Q16777;Q96KK5	H2A1D_HUMAN;H2A1H_HUMAN;H2A1J_HUMAN;H2A1_HUMAN	Histone H2A type 1	-0.182669	-1.68153	0.908067	0.19429
TFPT	P0C1Z6	P0C1Z6	TFPT_HUMAN	TCF3 fusion partner	-0.440145	-1.50284	0.785726	0.248939
ATXN1L	P0C7T5	P0C7T5	ATX1L_HUMAN	Ataxin-1-like	-0.491049	-3.8735	2.50983	0.00838472
JMJD7	P0C870	P0C870	JMJD7_HUMAN	Bifunctional peptidase and (3S)-lysyl hydroxylase JMJD7	-0.840325	-2.12768	1.2273	0.0997463
POLR2M	P0CAP2	P0CAP2	GRL1A_HUMAN	DNA-directed RNA polymerase II subunit GRINL1A	-1.2148	-6.75372	4.29938	0.000705882
OCM;OCM2	P0CE71;P0CE72	P0CE71;P0CE72	OCM2_HUMAN;ONCO_HUMAN	Putative oncomodulin-2	-0.506131	-0.897768	0.408477	0.504517
DERPC	P0CG12	P0CG12	DERPC_HUMAN	Decreased expression in renal and prostate cancer protein	-0.216332	-1.07821	0.513908	0.411334
POTEJ	P0CG39	P0CG38;P0CG39;Q9BYX7	POTEJ_HUMAN	POTE ankyrin domain family member J	0.101582	0.442775	0.175645	0.76045
ZNF888	P0CJ79	P0CJ79	ZN888_HUMAN	Zinc finger protein 888	-0.690997	-1.15344	0.559797	0.379784
LIMS3;LIMS4	P0CW19;P0CW20	P0CW19;P0CW20	LIMS3_HUMAN;LIMS4_HUMAN	LIM and senescent cell antigen-like-containing domain protein 3	-0.606933	-1.05373	0.499212	0.423024
TRAPPC2;TRAPPC2B	P0DI81;P0DI82	P0DI82;P0DI81	TPC2A_HUMAN;TPC2B_HUMAN	Trafficking protein particle complex subunit 2	0.118788	0.335041	0.128126	0.824984
PET100	P0DJ07	P0DJ07	PT100_HUMAN	Protein PET100 homolog, mitochondrial	0.315446	0.496445	0.200445	0.731082
HSPA1A;HSPA1B	P0DMV8;P0DMV9	P0DMV9;P0DMV8	HS71A_HUMAN;HS71B_HUMAN	Heat shock 70 kDa protein 1A	-0.425024	-2.31219	1.36305	0.0745621
IGLC2;IGLC3	P0DOY2;P0DOY3	P0DOY3;P0CF74;P0DOY2;B9A064;A0M8Q6;P0CG04	IGLC2_HUMAN;IGLC3_HUMAN	Immunoglobulin lambda constant 2	-0.719287	-1.62216	0.866992	0.210264
CALM1;CALM2;CALM3	P0DP23;P0DP24;P0DP25	P0DP24;P0DP25;P0DP23	CALM1_HUMAN;CALM2_HUMAN;CALM3_HUMAN	Calmodulin-1	-0.292705	-1.87319	1.0432	0.147165
POLR1D	P0DPB6	P0DPB6	RPAC2_HUMAN	DNA-directed RNA polymerases I and III subunit RPAC2	-0.068605	-0.36092	0.139262	0.809371
EEF1AKMT4;EEF1AKMT4-ECE2	P0DPD7;P0DPD8	P0DPD7;P0DPD8	EFCE2_HUMAN;EFMT4_HUMAN	EEF1A lysine methyltransferase 4	2.05715	3.98311	2.58705	0.00738272
AMY1A;AMY1B;AMY1C	P0DTE7;P0DTE8;P0DUB6	P0DTE7;P0DUB6;P19961;P0DTE8;P04746;Cont_Q3MHH8	AMY1A_HUMAN;AMY1B_HUMAN;AMY1C_HUMAN	Alpha-amylase 1B	-0.0255237	-0.045161	0.0155321	0.979553
ZFTRAF1	P0DTL6	P0DTL6	ZTRF1_HUMAN	Zinc finger TRAF-type-containing protein 1	0.900967	2.85343	1.76577	0.0335638
FDX1	P10109	P10109	ADX_HUMAN	Adrenodoxin, mitochondrial	0.740408	1.06382	0.505256	0.418199
RO60	P10155	P10155	RO60_HUMAN	RNA-binding protein RO60	-0.286487	-1.89035	1.05546	0.143772
GAA	P10253	P10253	LYAG_HUMAN	Lysosomal alpha-glucosidase	-0.721198	-0.995877	0.464964	0.452573
AR	P10275	P10275	ANDR_HUMAN	Androgen receptor	-1.30253	-2.51648	1.51468	0.0551807
RRAS	P10301	P10301	RRAS_HUMAN	Ras-related protein R-Ras	-0.463131	-1.78782	0.982571	0.16708
HLA-C	P10321	P10321	HLAC_HUMAN	HLA class I histocompatibility antigen, C alpha chain	0.571676	1.53102	0.804754	0.239932
ARAF	P10398	P10398	ARAF_HUMAN	Serine/threonine-protein kinase A-Raf	-0.11482	-0.43716	0.173093	0.763786
DLAT	P10515	P10515	ODP2_HUMAN	Dihydrolipoyllysine-residue acetyltransferase component of pyruvate dehydrogenase complex, mitochondrial	0.54704	2.1067	1.21196	0.102842
PTPRF	P10586	P10586	PTPRF_HUMAN	Receptor-type tyrosine-protein phosphatase F	-0.171367	-0.447314	0.177713	0.758083
NR2F6	P10588	P10588;P24468	NR2F6_HUMAN	Nuclear receptor subfamily 2 group F member 6	0.364317	2.53342	1.5273	0.0540567
NR2F1	P10589	P10589;P24468	COT1_HUMAN	COUP transcription factor 1	-0.350141	-0.854455	0.384203	0.525966
TXN	P10599	P10599	THIO_HUMAN	Thioredoxin	-0.675304	-2.26417	1.32759	0.0803962
COX5B	P10606	P10606	COX5B_HUMAN	Cytochrome c oxidase subunit 5B, mitochondrial	-0.298153	-1.3123	0.66007	0.316423
CTSA	P10619	P10619	PPGB_HUMAN	Lysosomal protective protein	0.897643	4.8116	3.14805	0.00328485
MGST1	P10620	P10620	MGST1_HUMAN	Microsomal glutathione S-transferase 1	0.241941	0.559001	0.230283	0.694257
C7	P10643	P10643	CO7_HUMAN	Complement component C7	-0.586788	-1.20105	0.589378	0.359278
PRKAR1A	P10644	P10644	KAP0_HUMAN	cAMP-dependent protein kinase type I-alpha regulatory subunit	0.182542	0.65086	0.275882	0.641055
ALPG	P10696	P10696	PPBN_HUMAN	Alkaline phosphatase, germ cell type	-0.13505	-0.118467	0.0418932	0.944914
UROS	P10746	P10746	HEM4_HUMAN	Uroporphyrinogen-III synthase	-1.20705	-2.36426	1.4016	0.0689023
ESD	P10768	P10768	ESTD_HUMAN	S-formylglutathione hydrolase	-1.14125	-6.10131	3.93744	0.00109375
HSPD1	P10809	P10809	CH60_HUMAN	60 kDa heat shock protein, mitochondrial	0.866256	3.31885	2.11	0.0174221
CLU	P10909	P10909	CLUS_HUMAN	Clusterin	-0.276138	-0.856487	0.385332	0.525653
HSPA5	P11021	P11021	BIP_HUMAN	Endoplasmic reticulum chaperone BiP	-0.0939667	-0.516644	0.209971	0.718501
LAMC1	P11047	P11047	LAMC1_HUMAN	Laminin subunit gamma-1	-0.364659	-2.19549	1.27701	0.0888509
ACP2	P11117	P11117	PPAL_HUMAN	Lysosomal acid phosphatase	-0.0105229	-0.0310747	0.0106296	0.985426
MAP2	P11137	P11137	MTAP2_HUMAN	Microtubule-associated protein 2	2.2797	2.98226	1.86156	0.02814
HSPA8	P11142	P11142;P54652	HSP7C_HUMAN	Heat shock cognate 71 kDa protein	0.233639	3.67919	2.3714	0.0108894
SLC2A1	P11166	P11166	GTR1_HUMAN	Solute carrier family 2, facilitated glucose transporter member 1	0.717726	1.71439	0.930972	0.185543
EPB41	P11171	P11171	EPB41_HUMAN	Protein 4.1	0.523424	3.21556	2.03412	0.0201281
UMPS	P11172	P11172	UMPS_HUMAN	Uridine 5'-monophosphate synthase	0.515099	3.4775	2.22577	0.0138932
PDHB	P11177	P11177	ODPB_HUMAN	Pyruvate dehydrogenase E1 component subunit beta, mitochondrial	0.341593	0.990272	0.461682	0.4551
DBT	P11182	P11182	ODB2_HUMAN	Lipoamide acyltransferase component of branched-chain alpha-keto acid dehydrogenase complex, mitochondrial	0.182162	0.905707	0.412971	0.499831
ITGAM	P11215	P11215	ITAM_HUMAN	Integrin alpha-M	-0.495726	-1.13737	0.549901	0.386251
PYGB	P11216	P06737;P11217;P11216	PYGB_HUMAN	Glycogen phosphorylase, brain form	0.15392	0.596138	0.248465	0.672963
PYGM	P11217	P11217	PYGM_HUMAN	Glycogen phosphorylase, muscle form	-0.296377	-1.0371	0.489296	0.431243
RALA	P11233	P11233	RALA_HUMAN	Ras-related protein Ral-A	-0.0693985	-0.504782	0.204364	0.726397
RALB	P11234	P11234	RALB_HUMAN	Ras-related protein Ral-B	0.0230092	0.138831	0.0494698	0.93358
BCR	P11274	P11274	BCR_HUMAN	Breakpoint cluster region protein	-0.362272	-2.97793	1.85834	0.0283427
LAMP1	P11279	P11279	LAMP1_HUMAN	Lysosome-associated membrane glycoprotein 1	0.658818	2.59861	1.57586	0.0495524
ACADM	P11310	P11310	ACADM_HUMAN	Medium-chain specific acyl-CoA dehydrogenase, mitochondrial	0.0942152	0.396116	0.154691	0.78846
TOP1	P11387	P11387	TOP1_HUMAN	DNA topoisomerase 1	0.532625	2.97042	1.85276	0.028611
TOP2A	P11388	P11388	TOP2A_HUMAN	DNA topoisomerase 2-alpha	2.79473	4.21638	2.74914	0.00568073
G6PD	P11413	P11413	G6PD_HUMAN	Glucose-6-phosphate 1-dehydrogenase	-0.122229	-0.548155	0.225039	0.700427
UBL4A	P11441	P11441	UBL4A_HUMAN	Ubiquitin-like protein 4A	-0.288161	-2.32353	1.37145	0.0733092
PC	P11498	P11498	PYC_HUMAN	Pyruvate carboxylase, mitochondrial	0.201146	0.274386	0.102718	0.85993
DMD	P11532	P11532	DMD_HUMAN	Dystrophin	-0.726824	-4.54967	2.97518	0.00423645
MTHFD1	P11586	P11586	C1TC_HUMAN	C-1-tetrahydrofolate synthase, cytoplasmic	-0.0227276	-0.103879	0.0365337	0.953215
IGF2R	P11717	P11717	MPRI_HUMAN	Cation-independent mannose-6-phosphate receptor	0.748963	2.2206	1.29548	0.085582
ADH5	P11766	P11766	ADHX_HUMAN	Alcohol dehydrogenase class-3	-1.06996	-3.35642	2.1375	0.0167215
CDK4	P11802	P11802	CDK4_HUMAN	Cyclin-dependent kinase 4	0.542745	3.32807	2.11675	0.0172305
PRPS2	P11908	P21108;P11908;P60891	PRPS2_HUMAN	Ribose-phosphate pyrophosphokinase 2	-1.33088	-9.52197	5.60455	0.000266667
PABPC1	P11940	P11940;Q9H361	PABP1_HUMAN	Polyadenylate-binding protein 1	0.517009	10.52	6.00132	0
PCNA	P12004	P12004	PCNA_HUMAN	Proliferating cell nuclear antigen	0.801004	2.82562	1.74506	0.0347621
HARS1	P12081	P12081;P49590	HARS1_HUMAN	Histidine--tRNA ligase, cytoplasmic	-0.383165	-1.77629	0.974432	0.169314
COL6A1	P12109	P12109	CO6A1_HUMAN	Collagen alpha-1(VI) chain	-2.05193	-5.04255	3.29694	0.00259779
COL6A2	P12110	P12110	CO6A2_HUMAN	Collagen alpha-2(VI) chain	-2.15394	-4.67751	3.06008	0.00374054
COL6A3	P12111	P12111	CO6A3_HUMAN	Collagen alpha-3(VI) chain	-2.07519	-4.64049	3.0356	0.00384375
SLC25A4	P12235	P12235	ADT1_HUMAN	ADP/ATP translocase 1	0.261911	0.911188	0.416081	0.497955
SLC25A6	P12236	P12236	ADT3_HUMAN	ADP/ATP translocase 3	0.49226	1.67514	0.903629	0.195862
IMPDH2	P12268	P12268	IMDH2_HUMAN	Inosine-5'-monophosphate dehydrogenase 2	0.0379897	0.167438	0.0602994	0.918088
TPR	P12270	P12270	TPR_HUMAN	Nucleoprotein TPR	0.305937	4.48334	2.93072	0.00448485
PIP	P12273	P12273	PIP_HUMAN	Prolactin-inducible protein	-0.208045	-0.238175	0.0880147	0.879976
CKB	P12277	P12277	KCRB_HUMAN	Creatine kinase B-type	-0.0850899	-0.176657	0.0638361	0.913796
ANXA3	P12429	P12429	ANXA3_HUMAN	Annexin A3	0.0286427	0.0844501	0.0294833	0.962568
CKMT1B	P12532	P12532	KCRU_HUMAN	Creatine kinase U-type, mitochondrial	1.45011	2.06783	1.18362	0.10958
BCKDHA	P12694	P12694	ODBA_HUMAN	2-oxoisovalerate dehydrogenase subunit alpha, mitochondrial	-0.342217	-1.23536	0.610953	0.346686
ACTN1	P12814	P12814;P35609	ACTN1_HUMAN	Alpha-actinin-1	-0.301028	-1.33631	0.675599	0.307306
ACE	P12821	P12821	ACE_HUMAN	Angiotensin-converting enzyme	-0.391416	-0.756065	0.330639	0.579209
CDH1	P12830	P12830	CADH1_HUMAN	Cadherin-1	-0.0884302	-0.317978	0.12088	0.833797
SRC	P12931	P12931	SRC_HUMAN	Proto-oncogene tyrosine-protein kinase Src	0.25858	1.67454	0.903212	0.196016
PEPD	P12955	P12955	PEPD_HUMAN	Xaa-Pro dipeptidase	0.439768	1.25365	0.622538	0.338706
XRCC6	P12956	P12956	XRCC6_HUMAN	X-ray repair cross-complementing protein 6	-0.472312	-2.85619	1.76782	0.0334815
XRCC5	P13010	P13010	XRCC5_HUMAN	X-ray repair cross-complementing protein 5	-0.395791	-2.61098	1.58507	0.048592
UNG	P13051	P13051	UNG_HUMAN	Uracil-DNA glycosylase	0.39956	1.11846	0.538324	0.394816
COX4I1	P13073	P13073	COX41_HUMAN	Cytochrome c oxidase subunit 4 isoform 1, mitochondrial	-0.304063	-1.2204	0.60152	0.352264
LAMP2	P13473	P13473	LAMP2_HUMAN	Lysosome-associated membrane glycoprotein 2	-0.132421	-0.51869	0.210941	0.717322
RNH1	P13489	P13489	RINI_HUMAN	Ribonuclease inhibitor	-1.11873	-5.35064	3.49038	0.00217352
CYP4B1	P13584	P13584	CP4B1_HUMAN	Cytochrome P450 4B1	-0.573934	-1.30708	0.65671	0.318442
VCAN	P13611	P13611	CSPG2_HUMAN	Versican core protein	-0.355888	-0.592601	0.246718	0.675218
EEF2	P13639	P13639	EF2_HUMAN	Elongation factor 2	-0.374885	-4.60197	3.01003	0.00396962
PDIA4	P13667	P13667	PDIA4_HUMAN	Protein disulfide-isomerase A4	0.220286	1.03017	0.485182	0.434635
C6	P13671	P13671	CO6_HUMAN	Complement component C6	-0.465673	-1.2305	0.607887	0.348542
P4HA1	P13674	P13674	P4HA1_HUMAN	Prolyl 4-hydroxylase subunit alpha-1	-0.0445195	-0.304638	0.115268	0.841739
TPT1	P13693	Q56UQ5;P13693	TCTP_HUMAN	Translationally-controlled tumor protein	0.0585454	0.243018	0.0899609	0.877056
ALAD	P13716	P13716	HEM2_HUMAN	Delta-aminolevulinic acid dehydratase	-1.2146	-3.22202	2.03888	0.0199211
HLA-E	P13747	P13747	HLAE_HUMAN	HLA class I histocompatibility antigen, alpha chain E	0.288924	0.661032	0.28106	0.633986
LCP1	P13796	P13796	PLSL_HUMAN	Plastin-2	-0.683394	-1.76365	0.965524	0.172317
PLS3	P13797	P13797	PLST_HUMAN	Plastin-3	-0.622265	-1.75517	0.959564	0.174587
APEH	P13798	P13798	ACPH_HUMAN	Acylamino-acid-releasing enzyme	-0.291591	-1.0673	0.507344	0.41613
ETFA	P13804	P13804	ETFA_HUMAN	Electron transfer flavoprotein subunit alpha, mitochondrial	-0.332887	-1.46839	0.762613	0.259895
GYS1	P13807	P13807	GYS1_HUMAN	Glycogen [starch] synthase, muscle	-0.763095	-6.29387	4.04675	0.00120354
PRKAR2A	P13861	P13861	KAP2_HUMAN	cAMP-dependent protein kinase type II-alpha regulatory subunit	-0.20255	-1.147	0.555824	0.382593
ENO3	P13929	P13929	ENOB_HUMAN	Beta-enolase	-0.401563	-0.796053	0.35214	0.557714
GTF2F2	P13984	P13984	T2FB_HUMAN	General transcription factor IIF subunit 2	0.0782079	0.444781	0.176558	0.759081
CD59	P13987	P13987	CD59_HUMAN	CD59 glycoprotein	-0.571575	-1.9927	1.1291	0.123888
MTHFD2	P13995	P13995	MTDC_HUMAN	Bifunctional methylenetetrahydrofolate dehydrogenase/cyclohydrolase, mitochondrial	2.88084	5.76339	3.74038	0.00131677
MIF	P14174	P14174	MIF_HUMAN	Macrophage migration inhibitory factor	-0.364035	-0.523246	0.213107	0.714848
CD99	P14209	P14209	CD99_HUMAN	CD99 antigen	-1.19492	-4.14596	2.70053	0.00614905
PRKCSH	P14314	P14314	GLU2B_HUMAN	Glucosidase 2 subunit beta	0.348565	2.96946	1.85205	0.0286316
HCLS1	P14317	P14317	HCLS1_HUMAN	Hematopoietic lineage cell-specific protein	-0.442339	-0.661073	0.281081	0.634064
FDPS	P14324	P14324	FPPS_HUMAN	Farnesyl pyrophosphate synthase	0.614807	3.77584	2.44049	0.00963588
TRIM27	P14373	P14373	TRI27_HUMAN	Zinc finger protein RFP	0.366344	2.04186	1.16473	0.114008
COX7A2	P14406	P14406	CX7A2_HUMAN	Cytochrome c oxidase subunit 7A2, mitochondrial	-0.496336	-1.77986	0.976946	0.168602
NID1	P14543	P14543	NID1_HUMAN	Nidogen-1	-1.21066	-5.3124	3.46669	0.00228571
AKR1A1	P14550	P14550	AK1A1_HUMAN	Aldo-keto reductase family 1 member A1	-0.861365	-3.51597	2.25369	0.0132696
PKM	P14618	P14618	KPYM_HUMAN	Pyruvate kinase PKM	-0.522183	-3.43094	2.1919	0.015049
ACYP2	P14621	P14621	ACYP2_HUMAN	Acylphosphatase-2	0.103374	0.318921	0.121278	0.833513
HSP90B1	P14625	P14625	ENPL_HUMAN	Endoplasmin	-0.0733279	-0.333233	0.127355	0.825888
CCNB1	P14635	P14635	CCNB1_HUMAN	G2/mitotic-specific cyclin-B1	1.97836	9.77709	5.70916	0
MYL6B	P14649	P14649	MYL6B_HUMAN	Myosin light chain 6B	-0.920751	-1.5595	0.824092	0.230357
SNRPB;SNRPN	P14678;P63162	P14678;P63162	RSMB_HUMAN;RSMN_HUMAN	Small nuclear ribonucleoprotein-associated proteins B and B'	0.0188997	0.190476	0.0691794	0.906714
IDE	P14735	P14735	IDE_HUMAN	Insulin-degrading enzyme	0.191813	1.76303	0.965088	0.172331
COX6B1	P14854	P14854	CX6B1_HUMAN	Cytochrome c oxidase subunit 6B1	-0.347249	-1.16196	0.565059	0.375765
POU2F1	P14859	P14859;Q9UKI9	PO2F1_HUMAN	POU domain, class 2, transcription factor 1	-0.120579	-1.2097	0.594801	0.356292
HNRNPL	P14866	P14866	HNRPL_HUMAN	Heterogeneous nuclear ribonucleoprotein L	0.0135677	0.0953695	0.0334334	0.956521
DARS1	P14868	P14868	SYDC_HUMAN	Aspartate--tRNA ligase, cytoplasmic	0.249309	2.04813	1.16928	0.112973
JUP	P14923	P14923	PLAK_HUMAN	Junction plakoglobin	-0.468088	-1.90336	1.06477	0.141674
UQCRB	P14927	P14927	QCR7_HUMAN	Cytochrome b-c1 complex subunit 7	-0.315292	-1.05545	0.500245	0.422269
BRAF	P15056	P15056	BRAF_HUMAN	Serine/threonine-protein kinase B-raf	0.0523347	0.35167	0.135262	0.815746
GLUL	P15104	P15104	GLNA_HUMAN	Glutamine synthetase	0.49532	1.35915	0.690453	0.298723
AKR1B1	P15121	P15121	ALDR_HUMAN	Aldo-keto reductase family 1 member B1	-0.731113	-1.60712	0.85665	0.215103
PVR	P15151	P15151	PVR_HUMAN	Poliovirus receptor	0.167619	0.615279	0.257971	0.661673
RAC2	P15153	P15153	RAC2_HUMAN	Ras-related C3 botulinum toxin substrate 2	-1.22256	-2.60632	1.5816	0.0488884
GSPT1	P15170	P15170	ERF3A_HUMAN	Eukaryotic peptide chain release factor GTP-binding subunit ERF3A	0.153303	1.67618	0.90435	0.195602
ARSA	P15289	P15289	ARSA_HUMAN	Arylsulfatase A	-0.739387	-1.02118	0.47986	0.438911
B4GALT1	P15291	P15291	B4GT1_HUMAN	Beta-1,4-galactosyltransferase 1	-0.000875076	-0.0044324	0.00150063	0.997518
EZR	P15311	P15311;P35241;P26038	EZRI_HUMAN	Ezrin	0.194398	0.694887	0.298473	0.615291
ATP6V1B1	P15313	P15313	VATB1_HUMAN	V-type proton ATPase subunit B, kidney isoform	0.0596915	0.0739846	0.0257271	0.966364
FOLR1	P15328	P15328	FOLR1_HUMAN	Folate receptor alpha	-0.647717	-0.940484	0.432818	0.48315
UCHL3	P15374	P15374	UCHL3_HUMAN	Ubiquitin carboxyl-terminal hydrolase isozyme L3	-0.204399	-0.88928	0.403687	0.508262
CD46	P15529	P15529	MCP_HUMAN	Membrane cofactor protein	0.485754	1.14989	0.557604	0.381546
NME1	P15531	P15531	NDKA_HUMAN	Nucleoside diphosphate kinase A	-0.0861828	-0.474617	0.190269	0.742779
NQO1	P15559	P15559	NQO1_HUMAN	NAD(P)H dehydrogenase [quinone] 1	-0.00196815	-0.00264523	0.000894943	0.998161
GNS	P15586	P15586	GNS_HUMAN	N-acetylglucosamine-6-sulfatase	0.324717	1.08868	0.520228	0.406404
PHKG2	P15735	P15735	PHKG2_HUMAN	Phosphorylase b kinase gamma catalytic chain, liver/testis isoform	-0.770144	-2.9377	1.82846	0.0299557
RPS2	P15880	P15880	RS2_HUMAN	Small ribosomal subunit protein uS5	-0.413652	-5.16157	3.37237	0.002368
DSP	P15924	P15924	DESP_HUMAN	Desmoplakin	-0.0789196	-0.289538	0.108973	0.85074
RPA2	P15927	P15927	RFA2_HUMAN	Replication protein A 32 kDa subunit	-0.466497	-2.57207	1.55609	0.0515176
MUC1	P15941	P15941	MUC1_HUMAN	Mucin-1	0.238579	0.678776	0.290152	0.623584
ALOX15	P16050	P16050	LOX15_HUMAN	Polyunsaturated fatty acid lipoxygenase ALOX15	-0.639972	-0.770447	0.33833	0.571118
NPR1	P16066	P16066	ANPRA_HUMAN	Atrial natriuretic peptide receptor 1	-0.179735	-0.25049	0.0929761	0.872613
CD44	P16070	P16070	CD44_HUMAN	CD44 antigen	-0.778178	-4.22812	2.75721	0.0056779
NQO2	P16083	P16083	NQO2_HUMAN	Ribosyldihydronicotinamide dehydrogenase [quinone]	-0.556951	-0.99328	0.463442	0.453935
ITGB4	P16144	P16144	ITB4_HUMAN	Integrin beta-4	-1.04773	-2.61119	1.58523	0.0486407
CBR1	P16152	P16152	CBR1_HUMAN	Carbonyl reductase [NADPH] 1	-0.775516	-2.8325	1.75018	0.0344219
ACADS	P16219	P16219	ACADS_HUMAN	Short-chain specific acyl-CoA dehydrogenase, mitochondrial	-1.29825	-1.87214	1.04245	0.147414
CREB1	P16220	P18846;P16220	CREB1_HUMAN	Cyclic AMP-responsive element-binding protein 1	-0.121068	-1.10104	0.527718	0.401651
GLB1	P16278	P16278	BGAL_HUMAN	Beta-galactosidase	0.963636	3.61098	2.32236	0.011698
PPP3CB	P16298	P16298	PP2BB_HUMAN	Serine/threonine-protein phosphatase 2B catalytic subunit beta isoform	-0.306672	-2.10363	1.20971	0.103285
NCK1	P16333	P16333	NCK1_HUMAN	Cytoplasmic protein NCK1	-0.125292	-1.18435	0.578958	0.365492
GCFC2	P16383	P16383	GCFC2_HUMAN	Intron Large complex component GCFC2	-0.0107119	-0.0748018	0.0260194	0.966369
H1-5	P16401	P16401	H15_HUMAN	Histone H1.5	1.38046	3.87117	2.50818	0.0084
H1-2	P16403	Q02539;P16402;P10412;P16401;P16403	H12_HUMAN	Histone H1.2	-0.429226	-2.15635	1.24829	0.0947174
EPCAM	P16422	P16422	EPCAM_HUMAN	Epithelial cell adhesion molecule	-0.439535	-1.47671	0.768181	0.256601
POR	P16435	P16435	NCPR_HUMAN	NADPH--cytochrome P450 reductase	0.434972	2.26143	1.32557	0.0807288
MGMT	P16455	P16455	MGMT_HUMAN	Methylated-DNA--protein-cysteine methyltransferase	-0.715797	-1.12458	0.542062	0.392086
ATP2A2	P16615	P16615	AT2A2_HUMAN	Sarcoplasmic/endoplasmic reticulum calcium ATPase 2	0.316842	1.87748	1.04626	0.146613
PLCG2	P16885	P16885	PLCG2_HUMAN	1-phosphatidylinositol 4,5-bisphosphate phosphodiesterase gamma-2	-0.133075	-0.668224	0.284736	0.63044
FAH	P16930	P16930	FAAA_HUMAN	Fumarylacetoacetase	-2.03803	-5.95857	3.85502	0.00119149
STMN1	P16949	P16949	STMN1_HUMAN	Stathmin	2.05008	8.83444	5.31084	0.000190476
YBX3	P16989	P16989	YBOX3_HUMAN	Y-box-binding protein 3	0.130517	1.48479	0.773595	0.254258
ZNF22	P17026	P17026	ZNF22_HUMAN	Zinc finger protein 22	-0.722065	-2.12568	1.22583	0.100098
ZNF24	P17028	P17028	ZNF24_HUMAN	Zinc finger protein 24	0.230405	1.49947	0.78346	0.249654
ZKSCAN1	P17029	P17029	ZKSC1_HUMAN	Zinc finger protein with KRAB and SCAN domains 1	-0.424817	-3.21906	2.0367	0.0200143
NAGA	P17050	P17050	NAGAB_HUMAN	Alpha-N-acetylgalactosaminidase	-0.311179	-1.17816	0.575101	0.368573
HSPA6	P17066	P0DMV9;P0DMV8;P48741;P17066	HSP76_HUMAN	Heat shock 70 kDa protein 6	-0.373999	-2.25596	1.32153	0.0813836
HMGA1	P17096	P17096	HMGA1_HUMAN	High mobility group protein HMG-I/HMG-Y	0.391376	1.23377	0.609952	0.347502
TMEM11	P17152	P17152	TMM11_HUMAN	Transmembrane protein 11, mitochondrial	0.0736252	0.317722	0.120771	0.833894
GOT1	P17174	P17174	AATC_HUMAN	Aspartate aminotransferase, cytoplasmic	0.0928601	0.459075	0.183098	0.751672
PRKCA	P17252	P17252	KPCA_HUMAN	Protein kinase C alpha type	-1.34269	-4.63053	3.029	0.0039171
ITGA2	P17301	P17301	ITA2_HUMAN	Integrin alpha-2	-0.373043	-1.14473	0.554428	0.383275
GJA1	P17302	P17302	CXA1_HUMAN	Gap junction alpha-1 protein	1.45561	3.01913	1.88892	0.0267032
SMPD1	P17405	P17405	ASM_HUMAN	Sphingomyelin phosphodiesterase	-0.538219	-1.41201	0.725151	0.279748
UBTF	P17480	P17480	UBF1_HUMAN	Nucleolar transcription factor 1	-0.0855711	-0.503223	0.20363	0.726748
HOXB6	P17509	P09630;P31267;P09067;P20719;P31274;P09629;P28356;Q00444;P17481;P31268;P31273;P17482;P17509	HXB6_HUMAN	Homeobox protein Hox-B6	-0.467699	-0.993208	0.4634	0.453877
JUND	P17535	P17535	JUND_HUMAN	Transcription factor JunD	0.0688465	0.36531	0.141169	0.806925
NDUFB7	P17568	P17568	NDUB7_HUMAN	NADH dehydrogenase [ubiquinone] 1 beta subcomplex subunit 7	-0.858229	-1.44538	0.747268	0.268505
PRKACA	P17612	P22694;P17612	KAPCA_HUMAN	cAMP-dependent protein kinase catalytic subunit alpha	0.316514	1.63611	0.876608	0.206053
CAPN2	P17655	P17655	CAN2_HUMAN	Calpain-2 catalytic subunit	-1.16584	-4.38679	2.86555	0.00506034
DES	P17661	P17661	DESM_HUMAN	Desmin	-0.548487	-0.876327	0.396409	0.514984
HLA-G	P17693	P17693	HLAG_HUMAN	HLA class I histocompatibility antigen, alpha chain G	0.630073	1.22932	0.607143	0.348856
PTPN2	P17706	P17706	PTN2_HUMAN	Tyrosine-protein phosphatase non-receptor type 2	-0.169729	-0.425543	0.16784	0.770657
CTPS1	P17812	P17812	PYRG1_HUMAN	CTP synthase 1	0.697977	2.97803	1.85842	0.0283581
DDX5	P17844	P17844	DDX5_HUMAN	Probable ATP-dependent RNA helicase DDX5	0.739064	7.38284	4.62677	0.000610169
PFKL	P17858	P08237;P17858	PFKAL_HUMAN	ATP-dependent 6-phosphofructokinase, liver type	-0.611145	-2.76145	1.69724	0.0382248
GM2A	P17900	P17900	SAP3_HUMAN	Ganglioside GM2 activator	0.184081	0.731258	0.317489	0.593415
LGALS3	P17931	P17931	LEG3_HUMAN	Galectin-3	-1.06321	-3.26124	2.06772	0.0188907
PSMC3	P17980	P17980	PRS6A_HUMAN	26S proteasome regulatory subunit 6A	0.0128572	0.326861	0.124642	0.829067
TCP1	P17987	P17987	TCPA_HUMAN	T-complex protein 1 subunit alpha	-0.125705	-2.0622	1.17952	0.110298
PTPN1	P18031	P18031	PTN1_HUMAN	Tyrosine-protein phosphatase non-receptor type 1	0.428636	3.82784	2.47748	0.00891257
IGFBP2	P18065	P18065;Cont_P13384	IBP2_HUMAN	Insulin-like growth factor-binding protein 2	2.3936	4.86684	3.18396	0.00306032
ERCC2	P18074	P18074	ERCC2_HUMAN	General transcription and DNA repair factor IIH helicase subunit XPD	0.0391554	0.36585	0.141404	0.80669
RPL35A	P18077	P18077	RL35A_HUMAN	Large ribosomal subunit protein eL33	-0.359974	-3.2139	2.0329	0.0201563
ITGB5	P18084	P18084	ITB5_HUMAN	Integrin beta-5	0.485378	3.06889	1.92579	0.0246958
ARF4	P18085	P18085	ARF4_HUMAN	ADP-ribosylation factor 4	0.406124	3.35163	2.134	0.0167337
RPL7	P18124	P18124	RL7_HUMAN	Large ribosomal subunit protein uL30	-0.355014	-2.81234	1.73516	0.0352269
VCL	P18206	P18206	VINC_HUMAN	Vinculin	0.132557	0.664803	0.282985	0.632081
GPX2	P18283	P18283	GPX2_HUMAN	Glutathione peroxidase 2	0	NaN	NaN	1
PTPRA	P18433	P18433	PTPRA_HUMAN	Receptor-type tyrosine-protein phosphatase alpha	-0.161934	-0.908157	0.41436	0.499206
NAT1	P18440	P18440	ARY1_HUMAN	Arylamine N-acetyltransferase 1	-0.862004	-5.54839	3.61146	0.00179679
IL1RN	P18510	P18510	IL1RA_HUMAN	Interleukin-1 receptor antagonist protein	-0.701127	-1.35432	0.687303	0.300546
ITGB6	P18564	P18564	ITB6_HUMAN	Integrin beta-6	-0.0634205	-0.298697	0.112785	0.845672
SON	P18583	P18583	SON_HUMAN	Protein SON	0.179045	1.65834	0.891974	0.200028
NELFE	P18615	P18615	NELFE_HUMAN	Negative elongation factor E	0.166243	1.83342	1.01487	0.155935
RPL17	P18621	P18621	RL17_HUMAN	Large ribosomal subunit protein uL22	-0.354501	-3.78001	2.44347	0.00958621
PGAM1	P18669	P18669	PGAM1_HUMAN	Phosphoglycerate mutase 1	-0.253839	-0.904982	0.41256	0.500315
RCC1	P18754	P18754	RCC1_HUMAN	Regulator of chromosome condensation	0.489417	2.08686	1.19748	0.106117
SDC1	P18827	P18827	SDC1_HUMAN	Syndecan-1	0	NaN	NaN	1
ATF6	P18850	P18850	ATF6A_HUMAN	Cyclic AMP-dependent transcription factor ATF-6 alpha	0.508759	2.72201	1.66784	0.0408718
LIG1	P18858	P18858	DNLI1_HUMAN	DNA ligase 1	0.527063	1.91107	1.0703	0.140104
ATP5PF	P18859	P18859	ATP5J_HUMAN	ATP synthase-coupling factor 6, mitochondrial	0.264451	0.990311	0.461704	0.45518
XRCC1	P18887	P18887	XRCC1_HUMAN	DNA repair protein XRCC1	-0.0625284	-0.405719	0.158957	0.783346
PAM	P19021	P19021	AMD_HUMAN	Peptidyl-glycine alpha-amidating monooxygenase	-0.712519	-1.31376	0.661012	0.315947
CDH2	P19022	P19022	CADH2_HUMAN	Cadherin-2	-1.06804	-2.52711	1.5226	0.0544298
GNAZ	P19086	P19086	GNAZ_HUMAN	Guanine nucleotide-binding protein G(z) subunit alpha	0.118139	0.206821	0.0755655	0.897818
PLCG1	P19174	P19174	PLCG1_HUMAN	1-phosphatidylinositol 4,5-bisphosphate phosphodiesterase gamma-1	0.745913	3.17986	2.00781	0.0213345
NCL	P19338	P19338	NUCL_HUMAN	Nucleolin	0.412428	1.91719	1.07469	0.138757
HK1	P19367	P19367	HXK1_HUMAN	Hexokinase-1	0.484434	1.85035	1.02691	0.152128
POLR2C	P19387	P19387	RPB3_HUMAN	DNA-directed RNA polymerase II subunit RPB3	-0.13809	-2.93722	1.8281	0.0299263
POLR2E	P19388	P19388	RPAB1_HUMAN	DNA-directed RNA polymerases I, II, and III subunit RPABC1	-0.00226553	-0.0291779	0.00997352	0.986279
NDUFV2	P19404	P19404	NDUV2_HUMAN	NADH dehydrogenase [ubiquinone] flavoprotein 2, mitochondrial	-0.736084	-2.47869	1.48657	0.0584528
ERCC3	P19447	P19447	ERCC3_HUMAN	General transcription and DNA repair factor IIH helicase subunit XPB	0.169568	2.45816	1.47131	0.0601114
TRIM21	P19474	P19474	RO52_HUMAN	E3 ubiquitin-protein ligase TRIM21	-1.02981	-2.40663	1.43303	0.0645832
EIF2AK2	P19525	P19525	E2AK2_HUMAN	Interferon-induced, double-stranded RNA-activated protein kinase	0.455614	2.56183	1.54846	0.0522842
WT1	P19544	P19544	WT1_HUMAN	Wilms tumor protein	-0.183876	-0.79526	0.35171	0.557879
SRM	P19623	P19623	SPEE_HUMAN	Spermidine synthase	-0.102095	-0.2329	0.0859021	0.882723
ORM2	P19652	P19652	A1AG2_HUMAN	Alpha-1-acid glycoprotein 2	-1.13459	-1.56131	0.825323	0.22983
CSNK2A2	P19784	P19784	CSK22_HUMAN	Casein kinase II subunit alpha'	0.0351506	0.278458	0.104393	0.857496
RXRA	P19793	P19793	RXRA_HUMAN	Retinoic acid receptor RXR-alpha	-1.439	-5.4409	3.54594	0.00204926
ITIH2	P19823	P19823	ITIH2_HUMAN	Inter-alpha-trypsin inhibitor heavy chain H2	-0.418028	-1.13812	0.550365	0.385854
ITIH1	P19827	P19827	ITIH1_HUMAN	Inter-alpha-trypsin inhibitor heavy chain H1	-0.145074	-0.614112	0.257389	0.662157
NFKB1	P19838	P19838	NFKB1_HUMAN	Nuclear factor NF-kappa-B p105 subunit	-1.15508	-4.5599	2.982	0.00422943
TYMP	P19971	P19971	TYPH_HUMAN	Thymidine phosphorylase	-0.0436836	-0.0732813	0.0254757	0.966648
ATP2B1	P20020	P20020	AT2B1_HUMAN	Plasma membrane calcium-transporting ATPase 1	-0.687911	-2.74643	1.68604	0.0392114
HLA-DPA1	P20036	P20036	DPA1_HUMAN	HLA class II histocompatibility antigen, DP alpha 1 chain	-0.358352	-0.633425	0.267066	0.651996
EIF2S2	P20042	P20042	IF2B_HUMAN	Eukaryotic translation initiation factor 2 subunit 2	0.306931	2.45671	1.47022	0.0602011
ANXA7	P20073	P20073	ANXA7_HUMAN	Annexin A7	0.00708493	0.0198186	0.00674988	0.991051
TBP	P20226	Q6SJ96;P20226	TBP_HUMAN	TATA-box-binding protein	0.138137	1.48608	0.774461	0.253839
TPSAB1;TPSB2	P20231;Q15661	Q15661;P20231	TRYB1_HUMAN;TRYB2_HUMAN	Tryptase beta-2	-1.42174	-3.1478	1.98415	0.0221383
BTF3	P20290	P20290	BTF3_HUMAN	Transcription factor BTF3	-0.523192	-2.35422	1.39416	0.069986
ALOX5AP	P20292	P20292	AL5AP_HUMAN	Arachidonate 5-lipoxygenase-activating protein	-0.755773	-1.44311	0.745756	0.26925
RAB4A	P20338	P20338	RAB4A_HUMAN	Ras-related protein Rab-4A	0.721284	3.11531	1.96014	0.0232527
RAB5A	P20339	P20339	RAB5A_HUMAN	Ras-related protein Rab-5A	0.252715	1.64308	0.881419	0.204087
RAB6A	P20340	Q9NRW1;P20340;Q9H0N0	RAB6A_HUMAN	Ras-related protein Rab-6A	0.60633	3.81631	2.46929	0.009125
MSH3	P20585	P20585	MSH3_HUMAN	DNA mismatch repair protein Msh3	0.0480162	0.733843	0.318853	0.591963
MX1	P20591	P20591	MX1_HUMAN	Interferon-induced GTP-binding protein Mx1	0.8415	1.17163	0.571051	0.371573
PSMB1	P20618	P20618	PSB1_HUMAN	Proteasome subunit beta type-1	-0.373264	-4.67625	3.05925	0.00373046
M6PR	P20645	P20645	MPRD_HUMAN	Cation-dependent mannose-6-phosphate receptor	0.247334	1.36004	0.691035	0.298693
COX5A	P20674	P20674	COX5A_HUMAN	Cytochrome c oxidase subunit 5A, mitochondrial	-0.259863	-0.965672	0.447355	0.468293
LMNB1	P20700	P20700	LMNB1_HUMAN	Lamin-B1	-0.280778	-1.23894	0.613219	0.345408
PZP	P20742	P20742	PZP_HUMAN	Pregnancy zone protein	0	NaN	NaN	1
OGN	P20774	P20774	MIME_HUMAN	Mimecan	-3.05417	-4.53414	2.96479	0.00440976
CAST	P20810	P20810	ICAL_HUMAN	Calpastatin	-0.772903	-2.59719	1.5748	0.0496457
IMPDH1	P20839	P20839	IMDH1_HUMAN	Inosine-5'-monophosphate dehydrogenase 1	0.978663	3.98845	2.59079	0.00739375
COL5A1	P20908	P20908	CO5A1_HUMAN	Collagen alpha-1(V) chain	-1.69768	-2.89391	1.79589	0.0317649
AGA	P20933	P20933	ASPG_HUMAN	N(4)-(beta-N-acetylglucosaminyl)-L-asparaginase	-0.607821	-1.25055	0.620574	0.340112
RASA1	P20936	P20936	RASA1_HUMAN	Ras GTPase-activating protein 1	-0.375228	-2.94584	1.83451	0.0297016
PTMS	P20962	P20962	PTMS_HUMAN	Parathymosin	0.0202776	0.0953569	0.0334288	0.956385
CDK11B	P21127	Q9UQ88;P21127	CD11B_HUMAN	Cyclin-dependent kinase 11B	0.470714	5.91007	3.82675	0.00120548
GSTM3	P21266	P21266	GSTM3_HUMAN	Glutathione S-transferase Mu 3	-0.199277	-0.358553	0.138237	0.810913
ATP6V1B2	P21281	P21281	VATB2_HUMAN	V-type proton ATPase subunit B, brain isoform	-0.103708	-0.635322	0.268022	0.650829
ATP6V1C1	P21283	P21283	VATC1_HUMAN	V-type proton ATPase subunit C 1	0.208719	1.51389	0.793175	0.245262
CSRP1	P21291	P21291	CSRP1_HUMAN	Cysteine and glycine-rich protein 1	-1.01829	-5.67189	3.68585	0.00154386
FLNA	P21333	P21333	FLNA_HUMAN	Filamin-A	0.324004	1.65505	0.889697	0.200875
NF1	P21359	P21359	NF1_HUMAN	Neurofibromin	-0.497053	-0.757621	0.331469	0.578257
MAOA	P21397	P21397	AOFA_HUMAN	Amine oxidase [flavin-containing] A	-2.1811	-2.99182	1.86866	0.027758
ACO1	P21399	P21399	ACOHC_HUMAN	Cytoplasmic aconitate hydratase	-0.752244	-2.88345	1.78811	0.0322961
NT5E	P21589	P21589	5NTD_HUMAN	5'-nucleotidase	-2.22608	-3.16164	1.99437	0.0218238
TAF1	P21675	Q8IZX4;P21675	TAF1_HUMAN	Transcription initiation factor TFIID subunit 1	0.144412	1.31185	0.659779	0.316582
EPHA1	P21709	P21709	EPHA1_HUMAN	Ephrin type-A receptor 1	1.02379	1.99624	1.13165	0.123263
MDK	P21741	P21741	MK_HUMAN	Midkine	-0.929318	-1.67938	0.906573	0.194735
VDAC1	P21796	P21796	VDAC1_HUMAN	Voltage-dependent anion-selective channel protein 1	0.251624	0.698514	0.300356	0.613448
BGN	P21810	P21810	PGS1_HUMAN	Biglycan	-1.1237	-2.14928	1.24311	0.0958994
SDHB	P21912	P21912	SDHB_HUMAN	Succinate dehydrogenase [ubiquinone] iron-sulfur subunit, mitochondrial	0.14382	0.580737	0.240883	0.681575
CD9	P21926	P21926	CD9_HUMAN	CD9 antigen	-0.231148	-0.958065	0.442951	0.473216
BCKDHB	P21953	P21953	ODBB_HUMAN	2-oxoisovalerate dehydrogenase subunit beta, mitochondrial	-0.340542	-1.1538	0.560014	0.379652
COMT	P21964	P21964	COMT_HUMAN	Catechol O-methyltransferase	-0.142177	-0.691441	0.296689	0.616689
TGM2	P21980	P21980	TGM2_HUMAN	Protein-glutamine gamma-glutamyltransferase 2	-2.34642	-3.31438	2.10672	0.0175598
MMUT	P22033	P22033	MUTA_HUMAN	Methylmalonyl-CoA mutase, mitochondrial	-0.33947	-0.968406	0.448941	0.466608
OSBP	P22059	P22059	OSBP1_HUMAN	Oxysterol-binding protein 1	-0.625807	-4.63892	3.03456	0.00383377
PCMT1	P22061	P22061	PIMT_HUMAN	Protein-L-isoaspartate(D-aspartate) O-methyltransferase	0.00148225	0.00958858	0.0032528	0.9961
FBL	P22087	P22087	FBRL_HUMAN	rRNA 2'-O-methyltransferase fibrillarin	-0.165717	-0.609667	0.255175	0.665079
GART	P22102	P22102	PUR2_HUMAN	Trifunctional purine biosynthetic protein adenosine-3	0.204288	0.995981	0.465025	0.452597
TNXB	P22105	P22105	TENX_HUMAN	Tenascin-X	-1.79735	-2.38897	1.41992	0.0663201
CDH3	P22223	P22223	CADH3_HUMAN	Cadherin-3	1.58979	4.99068	3.26379	0.00284321
PAICS	P22234	P22234	PUR6_HUMAN	Bifunctional phosphoribosylaminoimidazole carboxylase/phosphoribosylaminoimidazole succinocarboxamide synthetase	-0.384001	-1.26213	0.627929	0.335708
SCP2	P22307	P22307	SCP2_HUMAN	Sterol carrier protein 2	0.421128	1.90879	1.06867	0.14046
UBA1	P22314	P22314	UBA1_HUMAN	Ubiquitin-like modifier-activating enzyme 1	-0.0460395	-0.1688	0.0608205	0.917703
GPX3	P22352	P22352	GPX3_HUMAN	Glutathione peroxidase 3	-1.69148	-2.76857	1.70255	0.0378
NME2	P22392	O60361;P22392	NDKB_HUMAN	Nucleoside diphosphate kinase B	0.177589	0.972041	0.451052	0.46484
USF1	P22415	Q15853;P22415	USF1_HUMAN	Upstream stimulatory factor 1	0.0846881	0.909408	0.41507	0.498714
FDXR	P22570	P22570	ADRO_HUMAN	NADPH:adrenodoxin oxidoreductase, mitochondrial	-1.52523	-3.39413	2.16506	0.0158777
HNRNPA2B1	P22626	P22626	ROA2_HUMAN	Heterogeneous nuclear ribonucleoproteins A2/B1	-0.106441	-0.708268	0.305433	0.607987
RFX1	P22670	P22670	RFX1_HUMAN	MHC class II regulatory factor RFX1	0.235893	1.72517	0.938511	0.182513
CBL	P22681	P22681	CBL_HUMAN	E3 ubiquitin-protein ligase CBL	0.932804	3.4252	2.18772	0.0151005
PRKACB	P22694	P22694	KAPCB_HUMAN	cAMP-dependent protein kinase catalytic subunit beta	-0.487911	-1.11157	0.534123	0.396682
UQCRC2	P22695	P22695	QCR2_HUMAN	Cytochrome b-c1 complex subunit 2, mitochondrial	-0.297278	-1.08333	0.517	0.409128
TGM1	P22735	P22735	TGM1_HUMAN	Protein-glutamine gamma-glutamyltransferase K	-0.27718	-0.447947	0.178002	0.757708
FECH	P22830	P22830	HEMH_HUMAN	Ferrochelatase, mitochondrial	-0.924519	-1.63103	0.873104	0.207548
CES1	P23141	P23141	EST1_HUMAN	Liver carboxylesterase 1	-2.08397	-2.81659	1.73833	0.0350351
FBLN1	P23142	P23142	FBLN1_HUMAN	Fibulin-1	-1.64546	-4.0963	2.66608	0.00651178
TCEA1	P23193	Q15560;P23193	TCEA1_HUMAN	Transcription elongation factor A protein 1	-0.132596	-1.13524	0.548595	0.387053
PTGS1	P23219	P23219	PGH1_HUMAN	Prostaglandin G/H synthase 1	-0.9413	-2.80586	1.73034	0.0355633
ITGA6	P23229	P23229	ITA6_HUMAN	Integrin alpha-6	-0.487782	-1.71364	0.930448	0.185558
SFPQ	P23246	P23246	SFPQ_HUMAN	Splicing factor, proline- and glutamine-rich	0.224897	1.95439	1.10144	0.131215
TUBG1	P23258	P23258;Q9NRH3	TBG1_HUMAN	Tubulin gamma-1 chain	-0.525179	-5.41541	3.5303	0.00204831
PPIB	P23284	P23284	PPIB_HUMAN	Peptidyl-prolyl cis-trans isomerase B	-0.416326	-2.1407	1.23682	0.0973914
S100A1	P23297	P23297	S10A1_HUMAN	Protein S100-A1	0.00819643	0.00969321	0.00328843	0.996153
ME2	P23368	P23368	MAOM_HUMAN	NAD-dependent malic enzyme, mitochondrial	0.323053	1.30071	0.652609	0.321105
GLDC	P23378	P23378	GCSP_HUMAN	Glycine dehydrogenase (decarboxylating), mitochondrial	1.55485	1.6768	0.904779	0.19556
WARS1	P23381	P23381	SYWC_HUMAN	Tryptophan--tRNA ligase, cytoplasmic	0.186324	0.605714	0.253209	0.667161
RPS3	P23396	P23396	RS3_HUMAN	Small ribosomal subunit protein uS3	-0.436718	-5.35258	3.49158	0.00218349
RPS6KB1	P23443	P23443;Q9UBS0	KS6B1_HUMAN	Ribosomal protein S6 kinase beta-1	-0.297954	-1.49105	0.777796	0.252108
JAK1	P23458	P23458	JAK1_HUMAN	Tyrosine-protein kinase JAK1	-0.227178	-0.66765	0.284442	0.630389
PTPRG	P23470	P23470	PTPRG_HUMAN	Receptor-type tyrosine-protein phosphatase gamma	0.103608	0.623547	0.262105	0.657504
SP100	P23497	P23497;Q9H930	SP100_HUMAN	Nuclear autoantigen Sp-100	-0.438741	-4.02423	2.61584	0.00722186
AHCY	P23526	P23526	SAHH_HUMAN	Adenosylhomocysteinase	-0.00398374	-0.0186762	0.006358	0.991404
CFL1	P23528	Q9Y281;P23528	COF1_HUMAN	Cofilin-1	0.255092	2.03486	1.15964	0.115519
EIF4B	P23588	P23588	IF4B_HUMAN	Eukaryotic translation initiation factor 4B	0.314108	2.0906	1.20021	0.105448
F8A3	P23610	P23610	HAP40_HUMAN	40-kDa huntingtin-associated protein	0.459262	1.78537	0.980836	0.167798
ATP2B4	P23634	P23634;P20020	AT2B4_HUMAN	Plasma membrane calcium-transporting ATPase 4	0.348064	2.45311	1.46755	0.0604217
DGKA	P23743	P23743	DGKA_HUMAN	Diacylglycerol kinase alpha	0.609989	1.2593	0.626131	0.336341
CPT2	P23786	P23786	CPT2_HUMAN	Carnitine O-palmitoyltransferase 2, mitochondrial	0.67912	3.04529	1.90831	0.025722
DTYMK	P23919	P23919	KTHY_HUMAN	Thymidylate kinase	0.646213	2.95111	1.83842	0.0293621
RRM1	P23921	P23921	RIR1_HUMAN	Ribonucleoside-diphosphate reductase large subunit	0.228379	0.937745	0.431245	0.484433
PRTN3	P24158	P24158	PRTN3_HUMAN	Myeloblastin	-0.246733	-0.579047	0.240055	0.682535
CHM	P24386	P24386	RAE1_HUMAN	Rab proteins geranylgeranyltransferase component A 1	-0.392163	-2.33392	1.37913	0.0721498
EEF1B2	P24534	P24534	EF1B_HUMAN	Elongation factor 1-beta	0.263112	2.42499	1.44666	0.0631111
ATP5PB	P24539	P24539	AT5F1_HUMAN	ATP synthase F(0) complex subunit B1, mitochondrial	0.224104	0.967118	0.448194	0.467411
TBXAS1	P24557	P24557	THAS_HUMAN	Thromboxane-A synthase	-0.986432	-2.52228	1.51901	0.0547363
ACP1	P24666	P24666	PPAC_HUMAN	Low molecular weight phosphotyrosine protein phosphatase	-0.112867	-0.914251	0.417823	0.496411
ACAT1	P24752	P24752	THIL_HUMAN	Acetyl-CoA acetyltransferase, mitochondrial	-0.0446767	-0.100807	0.0354123	0.954648
TNC	P24821	P24821	TENA_HUMAN	Tenascin	1.34381	1.95908	1.10482	0.130607
MYL9	P24844	P24844	MYL9_HUMAN	Myosin regulatory light polypeptide 9	-0.428184	-5.7884	3.7552	0.00122293
POLR2A	P24928	P24928	RPB1_HUMAN	DNA-directed RNA polymerase II subunit RPB1	0.019062	0.373276	0.144642	0.802813
CDK2	P24941	P24941;Q00526	CDK2_HUMAN	Cyclin-dependent kinase 2	1.15829	5.20538	3.39991	0.00238017
GRK2	P25098	P25098	ARBK1_HUMAN	Beta-adrenergic receptor kinase 1	-0.173234	-1.79785	0.989658	0.16452
MCM3	P25205	P25205	MCM3_HUMAN	DNA replication licensing factor MCM3	1.77572	8.27436	5.05783	0.000129032
AZGP1	P25311	P25311	ZA2G_HUMAN	Zinc-alpha-2-glycoprotein	-0.790082	-1.74113	0.9497	0.17859
MPST	P25325	P25325	THTM_HUMAN	3-mercaptopyruvate sulfurtransferase	-0.531908	-2.49876	1.5015	0.0568465
RPS12	P25398	P25398	RS12_HUMAN	Small ribosomal subunit protein eS12	-0.375751	-5.24297	3.42345	0.00235593
BRD2	P25440	P25440	BRD2_HUMAN	Bromodomain-containing protein 2	0.244079	2.56141	1.54815	0.0522347
YY1	P25490	P25490	TYY1_HUMAN	Transcriptional repressor protein YY1	-0.0450496	-0.251843	0.0935233	0.871899
DNAJB1	P25685	Q9UDY4;P25685	DNJB1_HUMAN	DnaJ homolog subfamily B member 1	-0.112475	-0.824238	0.367517	0.542596
DNAJB2	P25686	P25686	DNJB2_HUMAN	DnaJ homolog subfamily B member 2	-0.0146776	-0.0988692	0.0347061	0.955294
ATP5F1A	P25705	P25705	ATPA_HUMAN	ATP synthase subunit alpha, mitochondrial	0.338836	1.63768	0.877687	0.205663
CTSS	P25774	P25774	CATS_HUMAN	Cathepsin S	-0.993614	-1.09865	0.526271	0.402325
PSMA1	P25786	P25786	PSA1_HUMAN	Proteasome subunit alpha type-1	-0.320804	-4.10667	2.67329	0.00645685
PSMA2	P25787	P25787	PSA2_HUMAN	Proteasome subunit alpha type-2	-0.413936	-4.82459	3.15651	0.00319255
PSMA3	P25788	P25788	PSA3_HUMAN	Proteasome subunit alpha type-3	-0.363738	-3.71293	2.39557	0.0104302
PSMA4	P25789	P25789	PSA4_HUMAN	Proteasome subunit alpha type-4	-0.264095	-3.90381	2.53125	0.00808104
ITGA3	P26006	P26006	ITA3_HUMAN	Integrin alpha-3	-0.901724	-4.31866	2.81921	0.00519115
ITGB8	P26012	P26012	ITB8_HUMAN	Integrin beta-8	1.6356	2.88657	1.79043	0.0321542
MSN	P26038	P26038	MOES_HUMAN	Moesin	0.021246	0.133844	0.0476042	0.936729
PTPN3	P26045	P26045	PTN3_HUMAN	Tyrosine-protein phosphatase non-receptor type 3	-0.918053	-2.76784	1.702	0.0378371
DDX6	P26196	P26196	DDX6_HUMAN	Probable ATP-dependent RNA helicase DDX6	0.304856	2.47612	1.48466	0.0586565
CTNNA2	P26232	P26232	CTNA2_HUMAN	Catenin alpha-2	-1.18159	-3.79383	2.4533	0.00936884
DNMT1	P26358	P26358	DNMT1_HUMAN	DNA (cytosine-5)-methyltransferase 1	1.09215	4.61206	3.01673	0.00395897
U2AF2	P26368	P26368	U2AF2_HUMAN	Splicing factor U2AF 65 kDa subunit	0.13181	0.845446	0.379206	0.53031
RPL13	P26373	P26373	RL13_HUMAN	Large ribosomal subunit protein eL13	-0.406822	-3.25057	2.05988	0.019146
CHML	P26374	P26374	RAE2_HUMAN	Rab proteins geranylgeranyltransferase component A 2	1.94922	6.51959	4.17222	0.000612245
IVD	P26440	P26440	IVD_HUMAN	Isovaleryl-CoA dehydrogenase, mitochondrial	-0.814389	-2.06874	1.18428	0.109584
S100A4	P26447	P26447	S10A4_HUMAN	Protein S100-A4	1.14292	2.30851	1.36033	0.0749291
MGAT1	P26572	P26572	MGAT1_HUMAN	Alpha-1,3-mannosyl-glycoprotein 2-beta-N-acetylglucosaminyltransferase	1.14837	2.1544	1.24686	0.0949628
HMGB2	P26583	P26583	HMGB2_HUMAN	High mobility group protein B2	0.846584	2.70692	1.65659	0.0419975
PTBP1	P26599	P26599	PTBP1_HUMAN	Polypyrimidine tract-binding protein 1	-0.133859	-0.706311	0.304412	0.608591
TARS1	P26639	P26639;A2RTX5	SYTC_HUMAN	Threonine--tRNA ligase 1, cytoplasmic	0.0645508	0.48961	0.197245	0.734681
VARS1	P26640	P26640	SYVC_HUMAN	Valine--tRNA ligase	0.319766	1.36208	0.692365	0.29786
EEF1G	P26641	P26641	EF1G_HUMAN	Elongation factor 1-gamma	0.386445	3.00117	1.8756	0.027429
FKBP2	P26885	P26885	FKBP2_HUMAN	Peptidyl-prolyl cis-trans isomerase FKBP2	-0.676494	-2.54761	1.53786	0.053114
STOM	P27105	P27105	STOM_HUMAN	Stomatin	-0.88405	-2.41307	1.43781	0.0640622
AK4	P27144	P27144;A0A8I5KW96	KAD4_HUMAN	Adenylate kinase 4, mitochondrial	0.28971	0.602382	0.251556	0.668424
PON1	P27169	P27169	PON1_HUMAN	Serum paraoxonase/arylesterase 1	-0.236651	-0.537824	0.22007	0.706759
ANXA13	P27216	P27216	ANX13_HUMAN	Annexin A13	-2.3021	-2.88008	1.7856	0.0323977
MAOB	P27338	P27338	AOFB_HUMAN	Amine oxidase [flavin-containing] B	-2.71709	-3.95008	2.56385	0.00774213
YWHAQ	P27348	P27348	1433T_HUMAN	14-3-3 protein theta	0.034881	0.193627	0.0704051	0.905436
MAPK3	P27361	P27361;P31152;Q16659;P28482	MK03_HUMAN	Mitogen-activated protein kinase 3	-0.47158	-2.63203	1.60076	0.0472754
MARK3	P27448	P27448	MARK3_HUMAN	MAP/microtubule affinity-regulating kinase 3	0.104912	0.26206	0.0976738	0.867387
DPP4	P27487	P27487	DPP4_HUMAN	Dipeptidyl peptidase 4	-3.12616	-3.64181	2.34455	0.0113798
ARNT	P27540	P27540	ARNT_HUMAN	Aryl hydrocarbon receptor nuclear translocator	-0.00813057	-0.056609	0.0195549	0.975182
RPL10	P27635	P27635	RL10_HUMAN	Large ribosomal subunit protein uL16	-0.407104	-4.57182	2.98996	0.00419095
RPA1	P27694	P27694	RFA1_HUMAN	Replication protein A 70 kDa DNA-binding subunit	-0.412802	-2.61372	1.58712	0.048442
APEX1	P27695	P27695	APEX1_HUMAN	DNA-(apurinic or apyrimidinic site) endonuclease	0.751268	1.66987	0.899968	0.196926
DCK	P27707	P27707	DCK_HUMAN	Deoxycytidine kinase	0.652634	3.56991	2.29273	0.0124389
CAD	P27708	P27708	PYR1_HUMAN	CAD protein	0.225103	2.34171	1.3849	0.0712614
CALR	P27797	P27797	CALR_HUMAN	Calreticulin	0.334683	1.66241	0.894793	0.198821
MAP4	P27816	P27816	MAP4_HUMAN	Microtubule-associated protein 4	0.239277	1.36843	0.696514	0.295719
CANX	P27824	P27824	CALX_HUMAN	Calnexin	-0.385228	-1.52126	0.798149	0.243012
PIK3R1	P27986	P27986	P85A_HUMAN	Phosphatidylinositol 3-kinase regulatory subunit alpha	-0.364126	-3.86614	2.50462	0.00844818
ITPKB	P27987	P27987	IP3KB_HUMAN	Inositol-trisphosphate 3-kinase B	0.199979	0.573233	0.23721	0.68533
PSMB8	P28062	P28062	PSB8_HUMAN	Proteasome subunit beta type-8	-0.887935	-3.91584	2.53974	0.00794169
PSMB9	P28065	P28065	PSB9_HUMAN	Proteasome subunit beta type-9	-1.10974	-3.17381	2.00335	0.0215061
PSMA5	P28066	P28066	PSA5_HUMAN	Proteasome subunit alpha type-5	-0.199437	-2.39712	1.42597	0.0656185
HLA-DMB	P28068	P28068	DMB_HUMAN	HLA class II histocompatibility antigen, DM beta chain	-0.418359	-0.988697	0.46076	0.455806
PSMB4	P28070	P28070	PSB4_HUMAN	Proteasome subunit beta type-4	-0.469062	-4.51596	2.95262	0.00447962
PSMB6	P28072	P28072	PSB6_HUMAN	Proteasome subunit beta type-6	-0.338169	-4.35288	2.84252	0.00507884
PSMB5	P28074	P28074	PSB5_HUMAN	Proteasome subunit beta type-5	-0.0116889	-0.0766805	0.0266919	0.965635
GSTM2	P28161	Q03013;P09488;P28161	GSTM2_HUMAN	Glutathione S-transferase Mu 2	-0.393365	-1.00293	0.469101	0.448999
ABCD3	P28288	P28288	ABCD3_HUMAN	ATP-binding cassette sub-family D member 3	0.781925	5.39169	3.51571	0.00218182
TMOD1	P28289	P28289	TMOD1_HUMAN	Tropomodulin-1	0.30623	1.21588	0.598682	0.354113
ITPRID2	P28290	P28290	ITPI2_HUMAN	Protein ITPRID2	0.162975	0.850425	0.381966	0.528219
NDUFS1	P28331	P28331	NDUS1_HUMAN	NADH-ubiquinone oxidoreductase 75 kDa subunit, mitochondrial	-0.71538	-2.55421	1.54278	0.052654
POLD1	P28340	P28340	DPOD1_HUMAN	DNA polymerase delta catalytic subunit	0.400556	2.63378	1.60207	0.0471888
TEAD1	P28347	Q15562;Q15561;Q99594;P28347	TEAD1_HUMAN	Transcriptional enhancer factor TEF-1	0.0166705	0.127792	0.045349	0.940432
SMARCA1	P28370	P28370	SMCA1_HUMAN	Probable global transcription activator SNF2L1	0.248536	1.76634	0.967417	0.171758
MAPK1	P28482	P28482	MK01_HUMAN	Mitogen-activated protein kinase 1	-0.330666	-2.29468	1.35011	0.0765007
GCA	P28676	P28676	GRAN_HUMAN	Grancalcin	-0.33341	-1.68262	0.908824	0.194142
RXRB	P28702	P28702;P48443;P19793	RXRB_HUMAN	Retinoic acid receptor RXR-beta	-0.00460267	-0.0377996	0.0129636	0.983441
ERCC5	P28715	P28715	ERCC5_HUMAN	DNA excision repair protein ERCC-5	-0.0953419	-0.237263	0.0876488	0.880126
GRN	P28799	P28799	GRN_HUMAN	Progranulin	1.16061	2.6969	1.64912	0.0426001
PTPRM	P28827	P28827	PTPRM_HUMAN	Receptor-type tyrosine-protein phosphatase mu	-0.561064	-1.70162	0.922056	0.188809
LAP3	P28838	P28838	AMPL_HUMAN	Cytosol aminopeptidase	-0.0189675	-0.0470944	0.016209	0.979132
CD38	P28907	P28907	CD38_HUMAN	ADP-ribosyl cyclase/cyclic ADP-ribose hydrolase 1	0	NaN	NaN	1
GTF2E1	P29083	P29083	T2EA_HUMAN	General transcription factor IIE subunit 1	0.639119	3.07301	1.92884	0.0245057
GTF2E2	P29084	P29084	T2EB_HUMAN	Transcription initiation factor IIE subunit beta	0.579744	3.56516	2.2893	0.0124759
TPP2	P29144	P29144	TPP2_HUMAN	Tripeptidyl-peptidase 2	-0.011905	-0.0881152	0.0308056	0.959922
IMPA1	P29218	P29218	IMPA1_HUMAN	Inositol monophosphatase 1	-0.561768	-2.55892	1.54629	0.0523316
EPHB2	P29323	P29323;Q15375	EPHB2_HUMAN	Ephrin type-B receptor 2	0.01316	0.101794	0.0357723	0.954399
PTPN6	P29350	P29350	PTN6_HUMAN	Tyrosine-protein phosphatase non-receptor type 6	-0.127534	-0.698381	0.300287	0.613435
SHC1	P29353	P29353	SHC1_HUMAN	SHC-transforming protein 1	0.47352	3.67575	2.36893	0.0109657
MPG	P29372	P29372	3MG_HUMAN	DNA-3-methyladenine glycosylase	-0.385481	-2.20846	1.28655	0.0874307
CRABP2	P29373	P29373	RABP2_HUMAN	Cellular retinoic acid-binding protein 2	1.51989	4.39119	2.86853	0.00503254
ARID4A	P29374	Q4LE39;P29374	ARI4A_HUMAN	AT-rich interactive domain-containing protein 4A	-0.148962	-0.695703	0.298897	0.614711
KDM5A	P29375	P29375	KDM5A_HUMAN	Lysine-specific demethylase 5A	-0.079933	-0.153783	0.0551031	0.9251
COL4A5	P29400	P29400	CO4A5_HUMAN	Collagen alpha-5(IV) chain	-1.05708	-1.29116	0.646478	0.32453
TKT	P29401	P29401	TKT_HUMAN	Transketolase	0.55812	1.91581	1.07371	0.138957
CASP1	P29466	P29466	CASP1_HUMAN	Caspase-1	-0.992216	-3.43072	2.19174	0.0150333
SERPINB3	P29508	P29508	SPB3_HUMAN	Serpin B3	-0.60309	-0.907755	0.414132	0.499237
RBMS1	P29558	P29558;Q6XE24	RBMS1_HUMAN	RNA-binding motif, single-stranded-interacting protein 1	0.414035	1.75182	0.957207	0.175375
PML	P29590	P29590	PML_HUMAN	Protein PML	-0.841741	-4.01341	2.60828	0.0072832
SERPINA4	P29622	P29622	KAIN_HUMAN	Kallistatin	-0.324706	-0.411155	0.161383	0.779935
EEF1D	P29692	P29692	EF1D_HUMAN	Elongation factor 1-delta	0.411965	3.12881	1.97012	0.0228196
OAS2	P29728	P29728	OAS2_HUMAN	2'-5'-oligoadenylate synthase 2	1.82197	2.66605	1.62612	0.0446551
MARCKS	P29966	P29966	MARCS_HUMAN	Myristoylated alanine-rich C-kinase substrate	-0.297857	-0.440203	0.174475	0.761768
GNA11	P29992	P29992	GNA11_HUMAN	Guanine nucleotide-binding protein subunit alpha-11	-1.09235	-3.68394	2.37481	0.0108113
ALDH4A1	P30038	P30038	AL4A1_HUMAN	Delta-1-pyrroline-5-carboxylate dehydrogenase, mitochondrial	0.310377	0.561188	0.231344	0.692839
PBLD	P30039	P30039	PBLD_HUMAN	Phenazine biosynthesis-like domain-containing protein	-2.21542	-4.05988	2.64074	0.00686557
ERP29	P30040	P30040	ERP29_HUMAN	Endoplasmic reticulum resident protein 29	0.275349	0.809097	0.359234	0.550205
PRDX6	P30041	P30041	PRDX6_HUMAN	Peroxiredoxin-6	-0.513354	-2.37596	1.41028	0.0676281
BLVRB	P30043	P30043	BLVRB_HUMAN	Flavin reductase (NADPH)	-0.69079	-3.25698	2.06459	0.0190027
PRDX5	P30044	P30044	PRDX5_HUMAN	Peroxiredoxin-5, mitochondrial	-0.365706	-1.41075	0.72432	0.280184
DDT	P30046	A6NHG4;P30046	DOPD_HUMAN	D-dopachrome decarboxylase	-0.498296	-1.92156	1.07783	0.137974
PRDX3	P30048	P30048	PRDX3_HUMAN	Thioredoxin-dependent peroxide reductase, mitochondrial	-0.238604	-0.601765	0.25125	0.668665
ATP5F1D	P30049	P30049	ATPD_HUMAN	ATP synthase subunit delta, mitochondrial	0.276602	1.05659	0.500925	0.421875
RPL12	P30050	P30050	RL12_HUMAN	Large ribosomal subunit protein uL11	-0.327342	-3.81474	2.46818	0.00913667
ECHS1	P30084	P30084	ECHM_HUMAN	Enoyl-CoA hydratase, mitochondrial	-0.229702	-0.759846	0.332656	0.576789
CMPK1	P30085	P30085	KCY_HUMAN	UMP-CMP kinase	-0.216774	-1.44372	0.746162	0.26913
PEBP1	P30086	P30086	PEBP1_HUMAN	Phosphatidylethanolamine-binding protein 1	-0.364228	-1.45359	0.752734	0.265545
PDIA3	P30101	P30101	PDIA3_HUMAN	Protein disulfide-isomerase A3	-0.149762	-0.850779	0.382162	0.528261
PPP2R1A	P30153	P30153	2AAA_HUMAN	Serine/threonine-protein phosphatase 2A 65 kDa regulatory subunit A alpha isoform	-0.134131	-1.67953	0.906678	0.194724
CDC27	P30260	P30260	CDC27_HUMAN	Cell division cycle protein 27 homolog	0.0790503	0.88583	0.401745	0.510036
FCER1G	P30273	P30273	FCERG_HUMAN	High affinity immunoglobulin epsilon receptor subunit gamma	-1.21856	-4.64523	3.03874	0.00383158
PPIF	P30405	P30405	PPIF_HUMAN	Peptidyl-prolyl cis-trans isomerase F, mitochondrial	0.634145	0.978992	0.455097	0.460885
NKTR	P30414	P30414	NKTR_HUMAN	NK-tumor recognition protein	-0.483442	-0.616335	0.258498	0.661677
NMT1	P30419	P30419	NMT1_HUMAN	Glycylpeptide N-tetradecanoyltransferase 1	-0.591291	-3.53569	2.26798	0.0130044
HMOX2	P30519	P30519	HMOX2_HUMAN	Heme oxygenase 2	-0.263199	-1.87507	1.04454	0.146895
ADSS2	P30520	P30520	PURA2_HUMAN	Adenylosuccinate synthetase isozyme 2	0.299261	2.04252	1.16521	0.113995
LRPAP1	P30533	P30533	AMRP_HUMAN	Alpha-2-macroglobulin receptor-associated protein	0.505649	1.43373	0.739525	0.272037
TSPO	P30536	P30536	TSPO_HUMAN	Translocator protein	-0.0517547	-0.435976	0.172556	0.764175
ADSL	P30566	P30566	PUR8_HUMAN	Adenylosuccinate lyase	-0.240258	-0.948872	0.437644	0.478635
CLIP1	P30622	P30622	CLIP1_HUMAN	CAP-Gly domain-containing linker protein 1	0.254351	1.28224	0.640762	0.327806
SRI	P30626	P30626	SORCN_HUMAN	Sorcin	-0.393916	-3.07083	1.92723	0.0246186
GSTT1	P30711	P30711	GSTT1_HUMAN	Glutathione S-transferase theta-1	-1.77915	-4.74529	3.10469	0.00342045
SERPINB1	P30740	P30740	ILEU_HUMAN	Leukocyte elastase inhibitor	-0.860678	-2.83319	1.75069	0.0344307
ALDH1B1	P30837	P30837	AL1B1_HUMAN	Aldehyde dehydrogenase X, mitochondrial	-0.457156	-1.05983	0.502864	0.420293
ALDH3A1	P30838	P30838	AL3A1_HUMAN	Aldehyde dehydrogenase, dimeric NADP-preferring	-2.58983	-6.61773	4.22588	0.000645161
POLR2B	P30876	P30876	RPB2_HUMAN	DNA-directed RNA polymerase II subunit RPB2	-0.0834885	-2.77086	1.70425	0.0377256
LCN1	P31025	P31025	LCN1_HUMAN	Lipocalin-1	-0.83362	-1.22835	0.606528	0.34932
SDHA	P31040	P31040	SDHA_HUMAN	Succinate dehydrogenase [ubiquinone] flavoprotein subunit, mitochondrial	0.163565	0.675515	0.288475	0.625879
CORO1A	P31146	P31146	COR1A_HUMAN	Coronin-1A	-0.948112	-1.69478	0.917294	0.190546
GDI1	P31150	P31150	GDIA_HUMAN	Rab GDP dissociation inhibitor alpha	-0.581461	-2.91682	1.81293	0.0307131
S100A7	P31151	P31151;Q86SG5	S10A7_HUMAN	Protein S100-A7	-0.504698	-1.03356	0.487193	0.432951
MAT2A	P31153	P31153	METK2_HUMAN	S-adenosylmethionine synthase isoform type-2	-0.342956	-3.78806	2.4492	0.00944149
PRKAR1B	P31321	P31321	KAP1_HUMAN	cAMP-dependent protein kinase type I-beta regulatory subunit	0.185326	0.776971	0.341834	0.568207
PRKAR2B	P31323	P31323	KAP3_HUMAN	cAMP-dependent protein kinase type II-beta regulatory subunit	0.0589923	0.21744	0.0797525	0.891567
SDC4	P31431	P31431	SDC4_HUMAN	Syndecan-4	0.235188	0.549323	0.225602	0.700495
TIA1	P31483	P31483	TIA1_HUMAN	Cytotoxic granule associated RNA binding protein TIA1	1.22322	7.45696	4.66403	0.000491228
FMO4	P31512	P31512	FMO4_HUMAN	Dimethylaniline monooxygenase [N-oxide-forming] 4	-0.308867	-0.654688	0.277827	0.638428
DNAJA1	P31689	P31689	DNJA1_HUMAN	DnaJ homolog subfamily A member 1	0.0877162	0.816645	0.363356	0.546227
AKT1	P31749	P31749	AKT1_HUMAN	RAC-alpha serine/threonine-protein kinase	0.328325	1.19317	0.584456	0.36244
AKT2	P31751	P31751	AKT2_HUMAN	RAC-beta serine/threonine-protein kinase	-0.0357622	-0.156782	0.0562401	0.923918
UQCRC1	P31930	P31930	QCR1_HUMAN	Cytochrome b-c1 complex subunit 1, mitochondrial	-0.317765	-1.16155	0.564803	0.37595
HIBADH	P31937	P31937	3HIDH_HUMAN	3-hydroxyisobutyrate dehydrogenase, mitochondrial	-0.525789	-1.84278	1.02153	0.153854
ATIC	P31939	P31939	PUR9_HUMAN	Bifunctional purine biosynthesis protein ATIC	-0.24578	-1.52554	0.801045	0.241777
HNRNPH3	P31942	P31942	HNRH3_HUMAN	Heterogeneous nuclear ribonucleoprotein H3	-0.363206	-1.27958	0.63906	0.328702
HNRNPH1	P31943	P31943	HNRH1_HUMAN	Heterogeneous nuclear ribonucleoprotein H	-0.187465	-0.693769	0.297894	0.615865
CASP14	P31944	P31944	CASPE_HUMAN	Caspase-14	-0.00727471	-0.0159964	0.00544005	0.992837
YWHAB	P31946	P31946	1433B_HUMAN	14-3-3 protein beta/alpha	0.101428	0.8222	0.366399	0.543788
SFN	P31947	P31947	1433S_HUMAN	14-3-3 protein sigma	0.130587	0.624736	0.262701	0.656819
STIP1	P31948	P31948	STIP1_HUMAN	Stress-induced-phosphoprotein 1	-0.230744	-1.62046	0.865818	0.210861
S100A11	P31949	P31949	S10AB_HUMAN	Protein S100-A11	0.391165	1.07259	0.510523	0.413838
L1CAM	P32004	P32004	L1CAM_HUMAN	Neural cell adhesion molecule L1	2.18858	3.24586	2.05642	0.0192334
INPP5B	P32019	P32019	I5P2_HUMAN	Type II inositol 1,4,5-trisphosphate 5-phosphatase	0.476233	1.34669	0.682337	0.30366
PRDX2	P32119	P32119	PRDX2_HUMAN	Peroxiredoxin-2	-0.172381	-0.733082	0.318451	0.592371
ARRB2	P32121	P32121	ARRB2_HUMAN	Beta-arrestin-2	-0.770554	-1.44161	0.744759	0.269736
GK	P32189	P32189;Q14409	GLPK_HUMAN	Glycerol kinase	-0.761861	-1.72689	0.93972	0.182127
DCTD	P32321	P32321	DCTD_HUMAN	Deoxycytidylate deaminase	-0.868385	-2.79095	1.71922	0.0364412
PYCR1	P32322	P32322	P5CR1_HUMAN	Pyrroline-5-carboxylate reductase 1, mitochondrial	0.732806	1.42964	0.736812	0.273504
SLC8A1	P32418	P32418	NAC1_HUMAN	Sodium/calcium exchanger 1	-1.09387	-3.03262	1.89892	0.0262187
GBP1	P32455	P32455;Q9H0R5	GBP1_HUMAN	Guanylate-binding protein 1	0.537854	1.47762	0.768791	0.256409
GBP2	P32456	P32456	GBP2_HUMAN	Guanylate-binding protein 2	-1.19902	-1.70568	0.924892	0.187761
ELF1	P32519	P32519	ELF1_HUMAN	ETS-related transcription factor Elf-1	-0.800583	-4.1688	2.71633	0.0059364
STX2	P32856	P32856	STX2_HUMAN	Syntaxin-2	-0.198772	-0.736676	0.320349	0.590578
CTH	P32929	P32929	CGL_HUMAN	Cystathionine gamma-lyase	-1.05745	-2.86842	1.77692	0.0328904
RPL9P9	P32969	P32969	RL9_HUMAN	Large ribosomal subunit protein uL6	-0.402569	-3.28435	2.0847	0.0182644
ACSL1	P33121	P33121	ACSL1_HUMAN	Long-chain-fatty-acid--CoA ligase 1	-0.744644	-1.27816	0.638156	0.329503
KIF5B	P33176	O60282;P33176;Q12840	KINH_HUMAN	Kinesin-1 heavy chain	0.338181	2.82349	1.74347	0.0348182
CSTF2	P33240	Q9H0L4;P33240	CSTF2_HUMAN	Cleavage stimulation factor subunit 2	0.11578	1.09074	0.521473	0.405658
LSP1	P33241	P33241	LSP1_HUMAN	Lymphocyte-specific protein 1	-0.735836	-1.0204	0.479396	0.439286
DUT	P33316	P33316	DUT_HUMAN	Deoxyuridine 5'-triphosphate nucleotidohydrolase, mitochondrial	-0.322779	-1.57091	0.831867	0.226669
ABCC1	P33527	P33527	MRP1_HUMAN	Multidrug resistance-associated protein 1	0.83391	4.77286	3.12275	0.00342522
CKS2	P33552	P33552	CKS2_HUMAN	Cyclin-dependent kinases regulatory subunit 2	0.584205	2.20116	1.28118	0.0882379
TTK	P33981	P33981	TTK_HUMAN	Dual specificity protein kinase TTK	1.81283	4.37549	2.85788	0.00509871
MCM4	P33991	P33991	MCM4_HUMAN	DNA replication licensing factor MCM4	1.97162	8.39399	5.11297	0.000137931
MCM5	P33992	P33992	MCM5_HUMAN	DNA replication licensing factor MCM5	1.91224	7.63405	4.75198	0.000313725
MCM7	P33993	P33993	MCM7_HUMAN	DNA replication licensing factor MCM7	2.10674	7.59094	4.7307	0.000290909
GALNS	P34059	P34059	GALNS_HUMAN	N-acetylgalactosamine-6-sulfatase	-0.964409	-2.60666	1.58186	0.0488913
SHMT1	P34896	P34896	GLYC_HUMAN	Serine hydroxymethyltransferase, cytosolic	-1.28499	-4.67532	3.05863	0.00372043
SHMT2	P34897	P34897	GLYM_HUMAN	Serine hydroxymethyltransferase, mitochondrial	1.60611	4.4014	2.87544	0.00505727
EPHX2	P34913	P34913	HYES_HUMAN	Bifunctional epoxide hydrolase 2	-1.95978	-9.69844	5.67715	0
HSPA4	P34932	P34932	HSP74_HUMAN	Heat shock 70 kDa protein 4	-0.0815581	-0.513768	0.208608	0.720455
MPI	P34949	P34949	MPI_HUMAN	Mannose-6-phosphate isomerase	-1.61977	-8.22861	5.03659	0.000114286
GPC1	P35052	P35052	GPC1_HUMAN	Glypican-1	0.242662	1.18915	0.581944	0.363635
PFN2	P35080	P35080	PROF2_HUMAN	Profilin-2	-0.928695	-1.67517	0.903647	0.19592
CA8	P35219	P35219	CAH8_HUMAN	Carbonic anhydrase-related protein	-0.0193806	-0.0462764	0.0159225	0.979353
CTNNA1	P35221	P35221;P26232	CTNA1_HUMAN	Catenin alpha-1	-0.140924	-0.719168	0.311133	0.601227
CTNNB1	P35222	P35222	CTNB1_HUMAN	Catenin beta-1	-0.118871	-0.66134	0.281217	0.633963
BMI1	P35226	P35226	BMI1_HUMAN	Polycomb complex protein BMI-1	0.22645	0.76413	0.334946	0.574469
PHB1	P35232	P35232	PHB1_HUMAN	Prohibitin 1	0.56801	2.23627	1.30702	0.083749
SERPINB6	P35237	P35237;P50452	SPB6_HUMAN	Serpin B6	-0.85475	-2.20206	1.28184	0.0881963
NF2	P35240	P35240	MERL_HUMAN	Merlin	-0.832989	-4.49115	2.93597	0.00454157
RDX	P35241	P35241	RADI_HUMAN	Radixin	0.520194	2.8074	1.73148	0.0355699
RPA3	P35244	P35244	RFA3_HUMAN	Replication protein A 14 kDa subunit	-0.567926	-4.94027	3.23141	0.00304377
RFC4	P35249	P35249	RFC4_HUMAN	Replication factor C subunit 4	0.702074	6.70862	4.27511	0.000674157
RFC2	P35250	P35250	RFC2_HUMAN	Replication factor C subunit 2	0.562755	5.37822	3.50741	0.00212093
RFC1	P35251	P35251	RFC1_HUMAN	Replication factor C subunit 1	-0.175763	-0.789698	0.348698	0.561309
RPL22	P35268	P35268	RL22_HUMAN	Large ribosomal subunit protein eL22	-0.0832872	-0.741312	0.322801	0.587779
GTF2F1	P35269	P35269	T2FA_HUMAN	General transcription factor IIF subunit 1	0.179475	1.17639	0.574003	0.36933
SPR	P35270	P35270	SPRE_HUMAN	Sepiapterin reductase	-0.702946	-2.04989	1.17056	0.112597
IDUA	P35475	P35475	IDUA_HUMAN	Alpha-L-iduronidase	-0.680655	-1.07987	0.514909	0.410675
UGT1A3	P35503	P35503	UD13_HUMAN	UDP-glucuronosyltransferase 1A3	-0.0327723	-0.193473	0.0703453	0.905432
CBS	P35520	P35520	CBS_HUMAN	Cystathionine beta-synthase	2.5143	4.21334	2.74705	0.00565996
SAA4	P35542	P35542	SAA4_HUMAN	Serum amyloid A-4 protein	-0.424719	-0.860962	0.387823	0.523468
FBN1	P35555	P35555	FBN1_HUMAN	Fibrillin-1	-2.68095	-6.03879	3.90149	0.00127273
IRS1	P35568	P35568	IRS1_HUMAN	Insulin receptor substrate 1	-0.568254	-1.99579	1.13133	0.123312
AGL	P35573	P35573	GDE_HUMAN	Glycogen debranching enzyme	-0.748302	-6.4596	4.13915	0.000699029
MYH9	P35579	P35579	MYH9_HUMAN	Myosin-9	-0.247345	-2.36353	1.40106	0.0689494
MYH10	P35580	P35580	MYH10_HUMAN	Myosin-10	-0.495428	-2.30302	1.35628	0.0756029
COPB2	P35606	P35606	COPB2_HUMAN	Coatomer subunit beta'	-0.025497	-0.281371	0.105594	0.855752
ACTN2	P35609	P35609	ACTN2_HUMAN	Alpha-actinin-2	-0.00924675	-0.0437473	0.0150377	0.980133
SOAT1	P35610	P35610	SOAT1_HUMAN	Sterol O-acyltransferase 1	-0.403016	-1.43591	0.740977	0.271423
ADD1	P35611	P35611	ADDA_HUMAN	Alpha-adducin	-0.341762	-1.23459	0.610468	0.347147
ADD2	P35612	P35612	ADDB_HUMAN	Beta-adducin	-0.496081	-0.775198	0.340881	0.569341
BSG	P35613	P35613	BASI_HUMAN	Basigin	0.866295	2.32272	1.37085	0.0734084
FUS	P35637	P35637	FUS_HUMAN	RNA-binding protein FUS	0.472757	2.42033	1.4432	0.0634742
NUP214	P35658	P35658	NU214_HUMAN	Nuclear pore complex protein Nup214	0.0501153	1.15341	0.559777	0.379712
DEK	P35659	P35659	DEK_HUMAN	Protein DEK	0.55542	5.45513	3.55466	0.00206965
MYH11	P35749	P35749	MYH11_HUMAN	Myosin-11	-0.778746	-1.18625	0.580142	0.364694
GLRX	P35754	P35754	GLRX1_HUMAN	Glutaredoxin-1	0.377155	0.814164	0.362	0.547847
PPM1A	P35813	O75688;P35813	PPM1A_HUMAN	Protein phosphatase 1A	0.0267327	0.309516	0.117315	0.838725
HMGCL	P35914	P35914	HMGCL_HUMAN	Hydroxymethylglutaryl-CoA lyase, mitochondrial	-0.109484	-0.735132	0.319533	0.591329
PSMC2	P35998	P35998	PRS7_HUMAN	26S proteasome regulatory subunit 7	-0.0377912	-0.806555	0.357849	0.551632
CHI3L1	P36222	P36222	CH3L1_HUMAN	Chitinase-3-like protein 1	1.06999	1.40917	0.723278	0.280427
GGT5	P36269	P36269	GGT5_HUMAN	Glutathione hydrolase 5 proenzyme	-0.763775	-2.06282	1.17997	0.110248
ARL2	P36404	P36404	ARL2_HUMAN	ADP-ribosylation factor-like protein 2	-0.106514	-0.854569	0.384266	0.526209
ARL3	P36405	P36405	ARL3_HUMAN	ADP-ribosylation factor-like protein 3	-0.285054	-1.66751	0.898331	0.197615
MAP2K2	P36507	P36507	MP2K2_HUMAN	Dual specificity mitogen-activated protein kinase kinase 2	-0.240625	-1.93715	1.08903	0.134626
ATP5F1C	P36542	P36542	ATPG_HUMAN	ATP synthase subunit gamma, mitochondrial	0.473174	2.10073	1.2076	0.10365
ATP6V1E1	P36543	P36543	VATE1_HUMAN	V-type proton ATPase subunit E 1	-0.0500052	-0.236838	0.0874785	0.880408
CPOX	P36551	P36551	HEM6_HUMAN	Oxygen-dependent coproporphyrinogen-III oxidase, mitochondrial	1.02084	4.834	3.16264	0.0031875
ARR3	P36575	P36575	ARRC_HUMAN	Arrestin-C	0.0085214	0.0273424	0.0093395	0.987404
RPL4	P36578	P36578	RL4_HUMAN	Large ribosomal subunit protein uL4	-0.380061	-3.12423	1.96674	0.0229051
LONP1	P36776	P36776	LONM_HUMAN	Lon protease homolog, mitochondrial	0.0633277	0.347887	0.133632	0.817364
PGM1	P36871	P36871	PGM1_HUMAN	Phosphoglucomutase-1	-0.14191	-0.392671	0.153167	0.790973
PPP1CC	P36873	P36873	PP1G_HUMAN	Serine/threonine-protein phosphatase PP1-gamma catalytic subunit	0.179762	1.56387	0.827065	0.228857
GNL1	P36915	P36915	GNL1_HUMAN	Guanine nucleotide-binding protein-like 1	0.0917537	0.476415	0.191103	0.742211
POLR2I	P36954	P36954	RPB9_HUMAN	DNA-directed RNA polymerase II subunit RPB9	-0.157443	-1.90621	1.06682	0.140929
SERPINF1	P36955	P36955	PEDF_HUMAN	Pigment epithelium-derived factor	-1.10791	-2.25239	1.3189	0.0817078
DLST	P36957	P36957	ODO2_HUMAN	Dihydrolipoyllysine-residue succinyltransferase component of 2-oxoglutarate dehydrogenase complex, mitochondrial	-0.0194418	-0.0759975	0.0264473	0.965794
GMPR	P36959	P36959	GMPR1_HUMAN	GMP reductase 1	-0.256463	-0.667913	0.284576	0.630305
GPX4	P36969	P36969	GPX4_HUMAN	Phospholipid hydroperoxide glutathione peroxidase	-0.083998	-0.451427	0.179592	0.75581
SRP14	P37108	P37108	SRP14_HUMAN	Signal recognition particle 14 kDa protein	-0.00782657	-0.0577145	0.0199452	0.974985
NUP62	P37198	P37198	NUP62_HUMAN	Nuclear pore glycoprotein p62	0.107522	1.31384	0.661061	0.315996
HPCAL1	P37235	P37235	HPCL1_HUMAN	Hippocalcin-like protein 1	-0.571377	-2.01478	1.14508	0.119552
FDFT1	P37268	P37268	FDFT_HUMAN	Squalene synthase	0.831616	2.53977	1.53203	0.0535982
TAGLN2	P37802	P37802	TAGL2_HUMAN	Transgelin-2	1.24772	2.87876	1.78462	0.0324738
TALDO1	P37837	P37837	TALDO_HUMAN	Transaldolase	-1.10605	-4.65472	3.04502	0.00384
ETFB	P38117	P38117	ETFB_HUMAN	Electron transfer flavoprotein subunit beta	-0.404378	-1.85353	1.02918	0.151428
RBMX	P38159	P38159;Q96E39	RBMX_HUMAN	RNA-binding motif protein, X chromosome	0.241324	1.23768	0.61242	0.345689
COIL	P38432	P38432	COIL_HUMAN	Coilin	0.435549	2.70951	1.65853	0.0418607
GGCX	P38435	P38435	VKGC_HUMAN	Vitamin K-dependent gamma-carboxylase	0.295109	1.76508	0.966536	0.172008
LIPA	P38571	P38571	LICH_HUMAN	Lysosomal acid lipase/cholesteryl ester hydrolase	-0.691918	-1.2232	0.603283	0.351412
ATP6V1A	P38606	P38606	VATA_HUMAN	V-type proton ATPase catalytic subunit A	-0.0528144	-0.237474	0.0877333	0.880106
HSPA9	P38646	P38646	GRP75_HUMAN	Stress-70 protein, mitochondrial	0.617855	1.74953	0.955598	0.175996
EIF4A3	P38919	P38919	IF4A3_HUMAN	Eukaryotic initiation factor 4A-III	0.286402	4.89879	3.20465	0.00311111
IGHMBP2	P38935	P38935	SMBP2_HUMAN	DNA-binding protein SMUBP-2	0.366872	1.75202	0.95735	0.175418
RPS19	P39019	P39019	RS19_HUMAN	Small ribosomal subunit protein eS19	-0.271861	-3.25175	2.06075	0.0191269
RPL3	P39023	P39023	RL3_HUMAN	Large ribosomal subunit protein uL3	-0.357049	-3.12281	1.96569	0.0229347
COL15A1	P39059	P39059	COFA1_HUMAN	Collagen alpha-1(XV) chain	-1.15824	-2.00541	1.13829	0.12143
COL18A1	P39060	P39060	COIA1_HUMAN	Collagen alpha-1(XVIII) chain	-1.78582	-4.40781	2.87978	0.00495364
DDOST	P39656	P39656	OST48_HUMAN	Dolichyl-diphosphooligosaccharide--protein glycosyltransferase 48 kDa subunit	-0.269154	-1.4168	0.728318	0.278345
ANP32A	P39687	P39687;O43423	AN32A_HUMAN	Acidic leucine-rich nuclear phosphoprotein 32 family member A	-0.19203	-1.08307	0.516842	0.409121
FEN1	P39748	P39748	FEN1_HUMAN	Flap endonuclease 1	1.17023	6.00523	3.88209	0.00121739
CUX1	P39880	P39880	CUX1_HUMAN	Homeobox protein cut-like 1	0.115647	1.29752	0.650559	0.322265
CAPG	P40121	P40121	CAPG_HUMAN	Macrophage-capping protein	-0.389364	-2.06046	1.17825	0.11053
CAP2	P40123	P40123	CAP2_HUMAN	Adenylyl cyclase-associated protein 2	-0.0607003	-0.186007	0.067446	0.908547
TXLNA	P40222	P40222	TXLNA_HUMAN	Alpha-taxilin	0.201107	4.19692	2.73573	0.00580036
CCT6A	P40227	P40227	TCPZ_HUMAN	T-complex protein 1 subunit zeta	-0.105647	-1.53218	0.805541	0.23945
PSMB10	P40306	P40306	PSB10_HUMAN	Proteasome subunit beta type-10	-1.2206	-3.55305	2.28054	0.0127261
PBX1	P40424	P40424;P40425;P40426	PBX1_HUMAN	Pre-B-cell leukemia transcription factor 1	-0.0223873	-0.11884	0.0420312	0.944889
PBX2	P40425	P40425	PBX2_HUMAN	Pre-B-cell leukemia transcription factor 2	0.246344	1.40219	0.718672	0.283247
RPL13A	P40429	Q6NVV1;P40429	RL13A_HUMAN	Large ribosomal subunit protein uL13	-0.38814	-3.60548	2.3184	0.0118005
ARL1	P40616	P40616	ARL1_HUMAN	ADP-ribosylation factor-like protein 1	0.186365	1.30158	0.653164	0.320757
MLH1	P40692	P40692	MLH1_HUMAN	DNA mismatch repair protein Mlh1	0.206418	1.22263	0.602928	0.351497
STAT3	P40763	P40763	STAT3_HUMAN	Signal transducer and activator of transcription 3	-0.262457	-2.47001	1.48012	0.0591154
USP8	P40818	P40818	UBP8_HUMAN	Ubiquitin carboxyl-terminal hydrolase 8	-0.229083	-4.22518	2.75519	0.00566976
PEX19	P40855	P40855	PEX19_HUMAN	Peroxisomal biogenesis factor 19	0.696033	1.54826	0.816442	0.234181
MDH1	P40925	P40925	MDHC_HUMAN	Malate dehydrogenase, cytoplasmic	-0.624829	-4.13392	2.69219	0.00621993
MDH2	P40926	P40926	MDHM_HUMAN	Malate dehydrogenase, mitochondrial	0.632128	2.61663	1.58929	0.0481732
RFC5	P40937	P40937	RFC5_HUMAN	Replication factor C subunit 5	0.518145	5.22594	3.41279	0.00236667
RFC3	P40938	P40938	RFC3_HUMAN	Replication factor C subunit 3	0.391998	3.61803	2.32744	0.0117136
HADHA	P40939	P40939	ECHA_HUMAN	Trifunctional enzyme subunit alpha, mitochondrial	0.45141	2.90702	1.80564	0.0311111
EIF2S3	P41091	P41091	IF2G_HUMAN	Eukaryotic translation initiation factor 2 subunit 3	0.366434	2.85787	1.76907	0.0334416
CETN2	P41208	P41208	CETN2_HUMAN	Centrin-2	-1.26696	-4.89484	3.2021	0.00310098
ETV6	P41212	P41212	ETV6_HUMAN	Transcription factor ETV6	0.0179379	0.126904	0.0450188	0.941047
EIF2D	P41214	P41214	EIF2D_HUMAN	Eukaryotic translation initiation factor 2D	-0.218472	-0.913445	0.417364	0.496779
MNDA	P41218	P41218	MNDA_HUMAN	Myeloid cell nuclear differentiation antigen	0.267792	0.859393	0.386949	0.524136
PTGDS	P41222	P41222	PTGDS_HUMAN	Prostaglandin-H2 D-isomerase	-1.71795	-3.4431	2.20076	0.0147408
BUD31	P41223	P41223	BUD31_HUMAN	Protein BUD31 homolog	0.322958	2.11455	1.21769	0.101763
UBA7	P41226	P41226	UBA7_HUMAN	Ubiquitin-like modifier-activating enzyme 7	-0.433389	-2.48256	1.48945	0.0581116
NAA10	P41227	Q9BSU3;P41227	NAA10_HUMAN	N-alpha-acetyltransferase 10	-0.133053	-0.703607	0.303004	0.610361
KDM5C	P41229	P41229	KDM5C_HUMAN	Lysine-specific demethylase 5C	0.250955	2.88108	1.78634	0.0323611
PPP1R2	P41236	Q6NXS1;P41236	IPP2_HUMAN	Protein phosphatase inhibitor 2	0.0163035	0.146627	0.0523996	0.929717
CSK	P41240	P41240	CSK_HUMAN	Tyrosine-protein kinase CSK	-0.176073	-2.11956	1.22136	0.100951
PNPLA4	P41247	P41247	PLPL4_HUMAN	Patatin-like phospholipase domain-containing protein 4	-0.863194	-2.30448	1.35735	0.0755303
GARS1	P41250	P41250	GARS_HUMAN	Glycine--tRNA ligase	0.452674	2.03236	1.15783	0.115779
IARS1	P41252	P41252	SYIC_HUMAN	Isoleucine--tRNA ligase, cytoplasmic	-0.0174811	-0.0765906	0.0266597	0.965559
EIF1	P41567	P41567	EIF1_HUMAN	Eukaryotic translation initiation factor 1	-0.189954	-0.995877	0.464964	0.452472
PRKCI	P41743	Q05513;P41743	KPCI_HUMAN	Protein kinase C iota type	0.337584	0.91895	0.420498	0.494661
ACTR1B	P42025	P61163;P42025	ACTY_HUMAN	Beta-centractin	-0.31415	-2.27764	1.33752	0.0785269
ECI1	P42126	P42126	ECI1_HUMAN	Enoyl-CoA delta isomerase 1, mitochondrial	-0.0895633	-0.304763	0.115321	0.841782
TMPO	P42166	P42166	LAP2A_HUMAN	Lamina-associated polypeptide 2, isoform alpha	0.3553	2.66652	1.62647	0.0446436
STAT1	P42224	P42224	STAT1_HUMAN	Signal transducer and activator of transcription 1-alpha/beta	1.042	3.2197	2.03717	0.0199857
STAT6	P42226	P42226	STAT6_HUMAN	Signal transducer and activator of transcription 6	-0.341493	-1.5931	0.847031	0.219465
STAT5A	P42229	P42229	STA5A_HUMAN	Signal transducer and activator of transcription 5A	-0.296098	-0.760937	0.333239	0.576138
MTREX	P42285	P42285	MTREX_HUMAN	Exosome RNA helicase MTR4	-0.157507	-1.46152	0.758025	0.26247
AKR1C3	P42330	P42330;Q04828;P52895	AK1C3_HUMAN	Aldo-keto reductase family 1 member C3	-3.07777	-2.80363	1.72867	0.0356765
ARHGAP25	P42331	P42331	RHG25_HUMAN	Rho GTPase-activating protein 25	-0.399053	-1.00257	0.468891	0.44913
PIK3CA	P42336	P42336	PK3CA_HUMAN	Phosphatidylinositol 4,5-bisphosphate 3-kinase catalytic subunit alpha isoform	0.84153	2.297	1.35183	0.0761639
PIK3CB	P42338	P42338	PK3CB_HUMAN	Phosphatidylinositol 4,5-bisphosphate 3-kinase catalytic subunit beta isoform	0.282112	1.11173	0.534218	0.396695
MTOR	P42345	P42345	MTOR_HUMAN	Serine/threonine-protein kinase mTOR	-0.23753	-2.96632	1.84972	0.0287387
PI4KA	P42356	P42356	PI4KA_HUMAN	Phosphatidylinositol 4-kinase alpha	-0.194036	-1.19012	0.58255	0.363361
EPS15	P42566	P42566	EPS15_HUMAN	Epidermal growth factor receptor substrate 15	-0.0406962	-0.384267	0.149461	0.796372
CASP3	P42574	P42574	CASP3_HUMAN	Caspase-3	0.686967	2.22631	1.29969	0.0849322
CASP2	P42575	P42575	CASP2_HUMAN	Caspase-2	0.417587	4.36275	2.84923	0.00509474
RPS27	P42677	P42677	RS27_HUMAN	Small ribosomal subunit protein eS27	0.157546	0.766617	0.336277	0.573639
TEC	P42680	P42680	TEC_HUMAN	Tyrosine-protein kinase Tec	-0.41198	-0.888912	0.40348	0.508446
HELZ	P42694	P42694	HELZ_HUMAN	Probable helicase with zinc finger domain	-0.108299	-0.706104	0.304304	0.60866
NCAPD3	P42695	P42695	CNDD3_HUMAN	Condensin-2 complex subunit D3	0.0947974	0.330316	0.126112	0.827793
RBM34	P42696	P42696	RBM34_HUMAN	RNA-binding protein 34	0.419179	3.92226	2.54426	0.0079063
LRPPRC	P42704	P42704	LPPRC_HUMAN	Leucine-rich PPR motif-containing protein, mitochondrial	0.850496	4.87022	3.18615	0.00303185
ACAA2	P42765	P42765	THIM_HUMAN	3-ketoacyl-CoA thiolase, mitochondrial	-0.252699	-0.801541	0.35512	0.55413
RPL35	P42766	P42766	RL35_HUMAN	Large ribosomal subunit protein uL29	-0.358913	-3.33212	2.11972	0.0171523
CDKN2A	P42771	P42772;P42771	CDN2A_HUMAN	Cyclin-dependent kinase inhibitor 2A	4.57032	5.81689	3.77203	0.00126316
CDKN2C	P42773	P42773	CDN2C_HUMAN	Cyclin-dependent kinase 4 inhibitor C	-1.39978	-4.31266	2.81512	0.00520559
PRCP	P42785	P42785	PCP_HUMAN	Lysosomal Pro-X carboxypeptidase	-0.0665839	-0.226403	0.0833099	0.886774
HTT	P42858	P42858	HD_HUMAN	Huntingtin	0.231597	0.727989	0.315767	0.595453
ECE1	P42892	P42892	ECE1_HUMAN	Endothelin-converting enzyme 1	1.39475	3.60105	2.3152	0.0118798
MTHFR	P42898	P42898	MTHR_HUMAN	Methylenetetrahydrofolate reductase (NADPH)	-0.627128	-1.37361	0.699906	0.293844
SLC1A4	P43007	P43007	SATT_HUMAN	Neutral amino acid transporter A	0.22457	0.700745	0.301515	0.612212
PAFAH1B1	P43034	P43034	LIS1_HUMAN	Platelet-activating factor acetylhydrolase IB subunit beta	-0.38958	-2.29251	1.34851	0.0766901
MCAM	P43121	P43121	MUC18_HUMAN	Cell surface glycoprotein MUC18	2.04093	4.53532	2.96558	0.00442054
CRAT	P43155	P43155	CACP_HUMAN	Carnitine O-acetyltransferase	-1.0306	-1.60264	0.853572	0.216652
MATR3	P43243	P43243	MATR3_HUMAN	Matrin-3	-0.0123319	-0.0597035	0.0206483	0.973828
MSH2	P43246	P43246	MSH2_HUMAN	DNA mismatch repair protein Msh2	0.306157	2.60333	1.57937	0.0491735
BTD	P43251	P43251	BTD_HUMAN	Biotinidase	-1.83895	-3.77878	2.44259	0.00962963
GPD2	P43304	P43304	GPDM_HUMAN	Glycerol-3-phosphate dehydrogenase, mitochondrial	-0.134031	-0.395444	0.154394	0.788812
SSR1	P43307	P43307	SSRA_HUMAN	Translocon-associated protein subunit alpha	0.0677656	0.406375	0.15925	0.783168
ALDH3B1	P43353	P43353	AL3B1_HUMAN	Aldehyde dehydrogenase family 3 member B1	-1.74754	-4.32134	2.82104	0.00519355
PTPN9	P43378	P43378	PTN9_HUMAN	Tyrosine-protein phosphatase non-receptor type 9	-0.174183	-0.546848	0.224408	0.701174
SYK	P43405	P43405	KSYK_HUMAN	Tyrosine-protein kinase SYK	-0.387992	-1.5132	0.792712	0.245562
RANBP1	P43487	P43487	RANG_HUMAN	Ran-specific GTPase-activating protein	-0.00630371	-0.0307364	0.0105126	0.985258
NAMPT	P43490	P43490	NAMPT_HUMAN	Nicotinamide phosphoribosyltransferase	0.938467	6.48155	4.15127	0.000712871
AFM	P43652	P43652	AFAM_HUMAN	Afamin	-1.3694	-2.0906	1.20021	0.105493
PSMC4	P43686	P43686	PRS6B_HUMAN	26S proteasome regulatory subunit 6B	-0.0629534	-1.12236	0.540706	0.393025
TSFM	P43897	P43897	EFTS_HUMAN	Elongation factor Ts, mitochondrial	0.737075	2.99863	1.87371	0.0274954
VDAC2	P45880	P45880	VDAC2_HUMAN	Voltage-dependent anion-selective channel protein 2	0.871818	3.80553	2.46163	0.00920968
ACADSB	P45954	P45954	ACDSB_HUMAN	Short/branched chain specific acyl-CoA dehydrogenase, mitochondrial	-0.587689	-1.89181	1.0565	0.143704
CBX5	P45973	P45973	CBX5_HUMAN	Chromobox protein homolog 5	-0.312547	-0.84462	0.378749	0.530756
USP5	P45974	P45974	UBP5_HUMAN	Ubiquitin carboxyl-terminal hydrolase 5	-0.221214	-1.43168	0.738165	0.272736
MAPK9	P45984	P45984	MK09_HUMAN	Mitogen-activated protein kinase 9	-0.328234	-4.39576	2.87162	0.0050393
MAP2K4	P45985	P45985	MP2K4_HUMAN	Dual specificity mitogen-activated protein kinase kinase 4	-0.225012	-1.83307	1.01462	0.156016
MKI67	P46013	P46013	KI67_HUMAN	Proliferation marker protein Ki-67	2.71915	7.43	4.65051	0.00062069
PHKA2	P46019	P46019	KPB2_HUMAN	Phosphorylase b kinase regulatory subunit alpha, liver isoform	-0.471267	-1.63729	0.877417	0.205694
PHKA1	P46020	P46020	KPB1_HUMAN	Phosphorylase b kinase regulatory subunit alpha, skeletal muscle isoform	-0.466385	-1.3083	0.657493	0.317763
RANGAP1	P46060	P46060	RAGP1_HUMAN	Ran GTPase-activating protein 1	0.492525	6.43587	4.12601	0.000685714
RECQL	P46063	P46063	RECQ1_HUMAN	ATP-dependent DNA helicase Q1	0.292643	0.910172	0.415505	0.498317
NOP2	P46087	P46087	NOP2_HUMAN	Probable 28S rRNA (cytosine(4447)-C(5))-methyltransferase	0.442795	2.19571	1.27717	0.0889078
ATRX	P46100	P46100	ATRX_HUMAN	Transcriptional regulator ATRX	-0.218728	-1.91142	1.07055	0.140102
CRK	P46108	P46108	CRK_HUMAN	Adapter molecule crk	-0.362106	-2.60819	1.583	0.0487895
CRKL	P46109	P46109	CRKL_HUMAN	Crk-like protein	-0.496004	-2.8469	1.7609	0.0338681
MTIF2	P46199	P46199	IF2M_HUMAN	Translation initiation factor IF-2, mitochondrial	0.258445	1.74257	0.950709	0.178161
BAG6	P46379	P46379	BAG6_HUMAN	Large proline-rich protein BAG6	0.0754208	0.880362	0.398672	0.513105
NSF	P46459	P46459	NSF_HUMAN	Vesicle-fusing ATPase	-0.365532	-2.84546	1.75983	0.0338893
MAP2K3	P46734	P46734	MP2K3_HUMAN	Dual specificity mitogen-activated protein kinase kinase 3	-0.596932	-4.76991	3.12082	0.0034152
BRCC3	P46736	P46736	BRCC3_HUMAN	Lys-63-specific deubiquitinase BRCC36	-0.337081	-4.76549	3.11793	0.00340525
RPL27A	P46776	P46776	RL27A_HUMAN	Large ribosomal subunit protein uL15	-0.446342	-3.82502	2.47548	0.00896589
RPL5	P46777	P46777	RL5_HUMAN	Large ribosomal subunit protein uL18	-0.358526	-4.09206	2.66314	0.00655034
RPL21	P46778	P46778	RL21_HUMAN	Large ribosomal subunit protein eL21	-0.450516	-3.01189	1.88355	0.026986
RPL28	P46779	P46779	RL28_HUMAN	Large ribosomal subunit protein eL28	-0.394688	-3.69249	2.38093	0.0106964
RPS9	P46781	P46781	RS9_HUMAN	Small ribosomal subunit protein uS4	-0.379191	-4.0067	2.60358	0.00734395
RPS5	P46782	P46782	RS5_HUMAN	Small ribosomal subunit protein uS7	-0.372288	-6.03059	3.89675	0.00125373
RPS10	P46783	P46783	RS10_HUMAN	Small ribosomal subunit protein eS10	-0.338521	-4.42452	2.89108	0.00482851
MAP1B	P46821	P46821	MAP1B_HUMAN	Microtubule-associated protein 1B	1.19345	1.73738	0.947069	0.179389
GNPDA1	P46926	P46926;Q8TDQ7	GNPI1_HUMAN	Glucosamine-6-phosphate isomerase 1	-0.276243	-1.81016	0.998367	0.16135
YAP1	P46937	P46937	YAP1_HUMAN	Transcriptional coactivator YAP1	-0.188542	-1.23827	0.612791	0.345546
UTRN	P46939	P46939	UTRN_HUMAN	Utrophin	-0.453639	-1.92402	1.0796	0.137332
IQGAP1	P46940	P46940	IQGA1_HUMAN	Ras GTPase-activating-like protein IQGAP1	-0.592738	-3.33742	2.1236	0.0170341
HAAO	P46952	P46952	3HAO_HUMAN	3-hydroxyanthranilate 3,4-dioxygenase	-1.42529	-3.06621	1.92381	0.0247748
GYG1	P46976	P46976	GLYG_HUMAN	Glycogenin-1	0.284087	1.13318	0.54733	0.38793
STT3A	P46977	P46977	STT3A_HUMAN	Dolichyl-diphosphooligosaccharide--protein glycosyltransferase subunit STT3A	-0.357104	-2.0422	1.16498	0.114011
RABIF	P47224	P47224	MSS4_HUMAN	Guanine nucleotide exchange factor MSS4	1.68086	2.38506	1.41702	0.0665774
PLA2G4A	P47712	P47712	PA24A_HUMAN	Cytosolic phospholipase A2	-0.845041	-1.73998	0.948893	0.178824
CAPZA2	P47755	P47755	CAZA2_HUMAN	F-actin-capping protein subunit alpha-2	-0.260482	-1.91981	1.07657	0.138355
CAPZB	P47756	P47756	CAPZB_HUMAN	F-actin-capping protein subunit beta	-0.153559	-2.54767	1.53791	0.0531284
ALDH1A3	P47895	P47895	AL1A3_HUMAN	Retinaldehyde dehydrogenase 3	-1.94218	-4.6504	3.04216	0.00386207
QARS1	P47897	P47897	SYQ_HUMAN	Glutamine--tRNA ligase	0.454538	4.5304	2.96229	0.00439806
RPL29	P47914	P47914	RL29_HUMAN	Large ribosomal subunit protein eL29	-0.30177	-1.9109	1.07018	0.140059
ID4	P47928	P47928	ID4_HUMAN	DNA-binding protein inhibitor ID-4	-0.0800145	-0.505164	0.204544	0.726308
LGALS7B	P47929	P47929	LEG7_HUMAN	Galectin-7	0.882882	0.856047	0.385088	0.525859
ZFP36L2	P47974	Q07352;P47974	TISD_HUMAN	mRNA decay activator protein ZFP36L2	0.0511954	0.402714	0.15762	0.784996
UQCRFS1	P47985	P0C7P4;P47985	UCRI_HUMAN	Cytochrome b-c1 complex subunit Rieske, mitochondrial	-0.236192	-0.879335	0.398096	0.513485
ATP5PO	P48047	P48047	ATPO_HUMAN	ATP synthase subunit O, mitochondrial	0.310135	1.27508	0.636184	0.330489
LIMS1	P48059	P48059	LIMS1_HUMAN	LIM and senescent cell antigen-like-containing domain protein 1	-0.552121	-1.37412	0.700237	0.293826
PREP	P48147	P48147	PPCE_HUMAN	Prolyl endopeptidase	-0.0257855	-0.107093	0.0377098	0.951722
ME1	P48163	P48163	MAOX_HUMAN	NADP-dependent malic enzyme	-0.953933	-1.62525	0.869115	0.209504
IREB2	P48200	P48200	IREB2_HUMAN	Iron-responsive element-binding protein 2	-0.464053	-1.68795	0.912536	0.19254
RFX2	P48378	P48378	RFX2_HUMAN	DNA-binding protein RFX2	-0.401735	-1.14116	0.552233	0.384682
RFX3	P48380	P22670;P48378;P48380	RFX3_HUMAN	Transcription factor RFX3	-0.0301993	-0.198563	0.0723304	0.902195
RFX5	P48382	P48382	RFX5_HUMAN	DNA-binding protein RFX5	-0.258002	-1.63605	0.876562	0.206026
PIP4K2A	P48426	P48426	PI42A_HUMAN	Phosphatidylinositol 5-phosphate 4-kinase type-2 alpha	-0.26074	-1.89592	1.05945	0.142891
ARCN1	P48444	P48444	COPD_HUMAN	Coatomer subunit delta	-0.0870675	-1.03902	0.490441	0.430168
LSS	P48449	P48449	LSS_HUMAN	Lanosterol synthase	0.0904578	0.348537	0.133912	0.817628
GCLC	P48506	P48506	GSH1_HUMAN	Glutamate--cysteine ligase catalytic subunit	-1.51032	-4.22668	2.75623	0.00569403
GCLM	P48507	P48507	GSH0_HUMAN	Glutamate--cysteine ligase regulatory subunit	0.628626	1.99727	1.1324	0.123044
CD151	P48509	P48509	CD151_HUMAN	CD151 antigen	-0.0929146	-0.189312	0.0687277	0.907345
PCP4	P48539	P48539	PCP4_HUMAN	Calmodulin regulator protein PCP4	-0.368912	-0.499925	0.202079	0.728987
PSMD8	P48556	P48556	PSMD8_HUMAN	26S proteasome non-ATPase regulatory subunit 8	0.0103061	0.115462	0.0407846	0.94672
PRRC2A	P48634	P48634	PRC2A_HUMAN	Protein PRRC2A	0.507335	4.64375	3.03776	0.00383202
GSS	P48637	P48637	GSHB_HUMAN	Glutathione synthetase	-0.671843	-2.93764	1.82841	0.0299336
CCT5	P48643	P48643	TCPE_HUMAN	T-complex protein 1 subunit epsilon	-0.12105	-2.01013	1.14171	0.120456
PTDSS1	P48651	P48651	PTSS1_HUMAN	Phosphatidylserine synthase 1	1.21185	2.85057	1.76363	0.0336841
NES	P48681	P48681	NEST_HUMAN	Nestin	-0.108906	-0.139655	0.0497786	0.933436
HSPA13	P48723	P48723	HSP13_HUMAN	Heat shock 70 kDa protein 13	0.75033	1.58416	0.840914	0.222274
AMT	P48728	P48728	GCST_HUMAN	Aminomethyltransferase, mitochondrial	-1.70624	-6.61301	4.22331	0.000631579
CSNK1A1	P48729	P48729;Q8N752	KC1A_HUMAN	Casein kinase I isoform alpha	-0.00686161	-0.0630119	0.0218201	0.971957
CSNK1D	P48730	P48730	KC1D_HUMAN	Casein kinase I isoform delta	-0.656459	-0.89225	0.405361	0.506956
IDH2	P48735	P48735	IDHP_HUMAN	Isocitrate dehydrogenase [NADP], mitochondrial	0.946887	2.43938	1.45735	0.0616943
PITPNB	P48739	P48739	PIPNB_HUMAN	Phosphatidylinositol transfer protein beta isoform	-0.279748	-1.672	0.901445	0.196406
ADGRE5	P48960	P48960	AGRE5_HUMAN	Adhesion G protein-coupled receptor E5	0.338939	1.96167	1.10668	0.130246
POLD2	P49005	P49005	DPOD2_HUMAN	DNA polymerase delta subunit 2	0.280361	1.89057	1.05562	0.143729
MARCKSL1	P49006	P49006	MRP_HUMAN	MARCKS-related protein	1.09253	4.31739	2.81835	0.00518072
PXN	P49023	P49023	PAXI_HUMAN	Paxillin	-0.286589	-2.64459	1.61013	0.0462787
NR2C2	P49116	P49116	NR2C2_HUMAN	Nuclear receptor subfamily 2 group C member 2	-0.0549203	-0.901208	0.410422	0.502468
MAPKAPK2	P49137	P49137	MAPK2_HUMAN	MAP kinase-activated protein kinase 2	0.365624	3.418	2.18247	0.0152405
ALDH9A1	P49189	P49189	AL9A1_HUMAN	4-trimethylaminobutyraldehyde dehydrogenase	-1.21853	-7.23872	4.55355	0.00075
RPL34	P49207	P49207	RL34_HUMAN	Large ribosomal subunit protein eL34	-0.379819	-3.9363	2.55415	0.00782738
RPIA	P49247	P49247	RPIA_HUMAN	Ribose-5-phosphate isomerase	0.146074	0.785577	0.346471	0.563242
LMAN1	P49257	P49257	LMAN1_HUMAN	Protein ERGIC-53	-0.634967	-5.92944	3.83806	0.00122222
NASP	P49321	P49321	NASP_HUMAN	Nuclear autoantigenic sperm protein	0.619643	4.06715	2.6458	0.00678089
FASN	P49327	P49327	FAS_HUMAN	Fatty acid synthase	0.854604	2.82311	1.74318	0.0348218
FNTA	P49354	P49354	FNTA_HUMAN	Protein farnesyltransferase/geranylgeranyltransferase type-1 subunit alpha	-0.498884	-2.98811	1.8659	0.0279266
FNTB	P49356	P49356	FNTB_HUMAN	Protein farnesyltransferase subunit beta	-0.390102	-1.21033	0.595195	0.356012
DHPS	P49366	P49366	DHYS_HUMAN	Deoxyhypusine synthase	0.379357	1.23371	0.609909	0.34746
CCT3	P49368	P49368	TCPG_HUMAN	T-complex protein 1 subunit gamma	-0.0781771	-1.25908	0.625989	0.33631
MRPL19	P49406	P49406	RM19_HUMAN	Large ribosomal subunit protein bL19m	0.127668	0.714714	0.308801	0.603607
ARRB1	P49407	P49407	ARRB1_HUMAN	Beta-arrestin-1	-0.443876	-0.920051	0.421125	0.49423
TUFM	P49411	P49411	EFTU_HUMAN	Elongation factor Tu, mitochondrial	0.414788	1.42127	0.731269	0.276368
ALDH7A1	P49419	P49419	AL7A1_HUMAN	Alpha-aminoadipic semialdehyde dehydrogenase	-0.160438	-0.445503	0.176887	0.758822
CDC34	P49427	P49427	UB2R1_HUMAN	Ubiquitin-conjugating enzyme E2 R1	0.0271106	0.100311	0.0352316	0.954478
INPP1	P49441	P49441	INPP_HUMAN	Inositol polyphosphate 1-phosphatase	-0.641611	-3.29911	2.09552	0.0180471
CENPA	P49450	P49450	CENPA_HUMAN	Histone H3-like centromeric protein A	0.516749	2.61893	1.591	0.0481329
CENPF	P49454	P49454	CENPF_HUMAN	Centromere protein F	1.70533	4.16601	2.7144	0.00595414
SRP9	P49458	P49458	SRP09_HUMAN	Signal recognition particle 9 kDa protein	0.0132363	0.121655	0.0430721	0.94379
UBE2A	P49459	P49459	UBE2A_HUMAN	Ubiquitin-conjugating enzyme E2 A	0.250866	0.582379	0.241688	0.680544
PCYT1A	P49585	P49585	PCY1A_HUMAN	Choline-phosphate cytidylyltransferase A	0.319333	1.893	1.05736	0.143526
AARS1	P49588	P49588	SYAC_HUMAN	Alanine--tRNA ligase, cytoplasmic	0.0996497	0.422217	0.166343	0.772208
CARS1	P49589	P49589	SYCC_HUMAN	Cysteine--tRNA ligase, cytoplasmic	0.229522	1.92906	1.08321	0.136372
HARS2	P49590	P49590	SYHM_HUMAN	Histidine--tRNA ligase, mitochondrial	0.320636	1.10239	0.528536	0.401149
SARS1	P49591	P49591	SYSC_HUMAN	Serine--tRNA ligase, cytoplasmic	-0.171226	-1.76881	0.969163	0.17123
PPM1F	P49593	P49593	PPM1F_HUMAN	Protein phosphatase 1F	-0.659719	-1.91804	1.0753	0.138576
PRIM1	P49642	P49642	PRI1_HUMAN	DNA primase small subunit	1.55552	6.50796	4.16582	0.00068
PRIM2	P49643	P49643	PRI2_HUMAN	DNA primase large subunit	0.975908	2.87092	1.77878	0.0329061
CSNK1E	P49674	P49674;P48730	KC1E_HUMAN	Casein kinase I isoform epsilon	-0.206033	-2.28488	1.34287	0.0775335
CTCF	P49711	P49711;Q8NI51	CTCF_HUMAN	Transcriptional repressor CTCF	-0.0449687	-0.290695	0.109454	0.850313
PSMB3	P49720	P49720	PSB3_HUMAN	Proteasome subunit beta type-3	-0.448793	-5.47179	3.56484	0.00192965
PSMB2	P49721	P49721	PSB2_HUMAN	Proteasome subunit beta type-2	-0.34951	-2.76452	1.69953	0.0380721
MCM2	P49736	P49736	MCM2_HUMAN	DNA replication licensing factor MCM2	1.8372	7.13967	4.50263	0.000685714
ACADVL	P49748	P49748	ACADV_HUMAN	Very long-chain specific acyl-CoA dehydrogenase, mitochondrial	-0.373994	-2.13744	1.23444	0.0978613
YLPM1	P49750	P49750	YLPM1_HUMAN	YLP motif-containing protein 1	0.0283859	0.22745	0.0837268	0.886158
VPS41	P49754	P49754	VPS41_HUMAN	Vacuolar protein sorting-associated protein 41 homolog	0.290485	1.21131	0.59581	0.355669
TMED10	P49755	P49755	TMEDA_HUMAN	Transmembrane emp24 domain-containing protein 10	-0.199085	-1.49092	0.777711	0.252105
RBM25	P49756	P49756	RBM25_HUMAN	RNA-binding protein 25	0.136757	1.57834	0.836936	0.22438
NUMB	P49757	P49757	NUMB_HUMAN	Protein numb homolog	-0.150868	-0.992183	0.4628	0.454195
CLK2	P49760	P49760	CLK2_HUMAN	Dual specificity protein kinase CLK2	0.530839	4.19006	2.73101	0.00581227
EIF2B2	P49770	P49770	EI2BB_HUMAN	Translation initiation factor eIF-2B subunit beta	-0.150065	-1.83427	1.01548	0.155746
HINT1	P49773	P49773	HINT1_HUMAN	Adenosine 5'-monophosphoramidase HINT1	-0.349681	-1.61888	0.864732	0.211405
FHIT	P49789	P49789	FHIT_HUMAN	Bis(5'-adenosyl)-triphosphatase	-0.351229	-1.90626	1.06686	0.140965
NUP153	P49790	P49790	NU153_HUMAN	Nuclear pore complex protein Nup153	0.591002	5.56927	3.6241	0.00184615
RANBP2	P49792	P49792	RBP2_HUMAN	E3 SUMO-protein ligase RanBP2	0.194752	2.97637	1.85719	0.0283416
TSC2	P49815	P49815	TSC2_HUMAN	Tuberin	-0.101016	-0.783482	0.345341	0.564024
NDUFV1	P49821	P49821	NDUV1_HUMAN	NADH dehydrogenase [ubiquinone] flavoprotein 1, mitochondrial	-0.778213	-2.49448	1.49832	0.0571092
GSK3A	P49840	P49841;P49840	GSK3A_HUMAN	Glycogen synthase kinase-3 alpha	0.0600328	0.405541	0.158878	0.78309
GSK3B	P49841	P49841	GSK3B_HUMAN	Glycogen synthase kinase-3 beta	0.725335	6.17731	3.98084	0.00115702
STK19	P49842	P49842	STK19_HUMAN	Serine/threonine-protein kinase 19	0.224366	1.3039	0.654661	0.319696
TAF6	P49848	P49848	TAF6_HUMAN	Transcription initiation factor TFIID subunit 6	0.168127	1.70887	0.927118	0.186647
NT5C2	P49902	P49902	5NTC_HUMAN	Cytosolic purine 5'-nucleotidase	0.574769	2.55294	1.54184	0.0526963
[truncated: 4,797 more rows]
