# Supplementary material for: Spatial proteomics of ovarian cancer precursors delineates early disease changes and drug targets
Source: Mol Syst Biol. 2025 Nov 13;22(1):7–41. doi: 10.1038/s44320-025-00168-4 (PMC12759074; doi:10.1038/s44320-025-00168-4)
Supplement: Supplementary file 2 — Table EV1 [file 44320_2025_168_MOESM2_ESM.xlsx]

## Sheet: Table_EV1
Table EV1. Summary of clinical characteristics of the patient cohort, including age, lesions analyzed, tumor grade and p53 and Ki67 IHC patterns.
Patient	Slide code	Lesions diagnosed	N stage	M	Grade	p53 IHC pattern	Ki67 grade	Comments sampling
1	W29A	STIC	NA	NA	G3	OE	45
	W29B	Tumor ovary				OE	60
2	W29C	STIC	pN1a (1/2)	NA	G3	OE	40	STIC stroma lost
	W29C	Tumor ovary				OE	60
3	W29D	STIL	pN0 (0/5)	NA	G3	loss	1	Sample lost
	W31A	STIC				OE	40
	W31A	Tumor ovary				OE	60
4	W29F	STIC	pNX	NA	G3	OE	30
	W29E	Tumor ovary				OE	65
5	W29G	STIC	NA	NA	G3	OE	25
	W29G	Tumor ovary				OE	60
6	W29H	STIC	NA	NA	G3	OE	20
	W29H	Tumor ovary				OE	30
7	W29I	STIC	N1a (2/21)	NA	G3	loss	40
	W29J	Tumor ovary				loss	60
8	W30A	STIC	N0 (0/7)	NA	G3	loss	30
	W30A	Tumor ovary				loss	90
9	W30B	STIC	pN1a (21/71)	NA	G3	OE	50
	W30B	Tumor ovary				OE	60
10	W30C	STIC	pN1a	NA	G3	OE	30	Epithelial stroma lost
	W30C	Tumor ovary				OE	60
11	W30D	STIC 1	NA	NA	G3	OE	60	Bilateral STIC
	W30D	Tumor ovary				OE	70
	W30F	STIC 2				OE	40
12	W30E	STIC	NA	NA	G3	loss	40
	W30E	Tumor ovary				loss	60
13	W30H	STIC	pN1b (2/62)	NA	G3	OE	25
	W30G	Tumor ovary				OE	75
14	W30K	STIC 1	pN1b (7/7)	NA	G3	loss	20	Bilateral STIC, tumor and tumor stroma lost
	W30K	Tumor ovary				loss	30
	W30J	STIC 2				loss	25
15	W30L	STIC	pN1a (8/70)	NA	G3	OE	30
	W30L	Tumor ovary				OE	60
16	W30M	STIC	pN0 (0/29)	NA	G3	OE	20
	W30M	Tumor ovary				OE	35
17	W30P	STIC	pNX	NA	G3	loss	30	Tumor and tumor stroma lost
	W30P	Tumor ovary				loss	70
18	W30V	STIC	pNX	NA	G3	loss	40
	W30V	Tumor ovary				loss	60
19	W30X	STIC	pN1a (5/5)	pM1a	G3	loss	40
	W30X	Tumor Ovary				loss	60
20	W31C	STIC	pN1a (10/20)	NA	G3	loss	30
	W31C	Tumor ovary				loss	50
21	W31E	STIC	pN1a (12/14)	NA	G3	OE	20	Was not included in the analysis
	W31E	Tumor ovary				OE	30
22	W31F	STIC	pN0 (0/7)	M1 (HEP, SPLEEN)	G3	OE	40
	W31F	Tumor ovary				OE	70
23	W31L	STIC	pN1a (2/7)	pM1a (PLE)	G3	OE	50
	W31K	Tumor lesser pelvis				OE	65
24	W31O	STIC	pN1(3/30)	NA	G3	loss	40
	W31O	Tumor ovary				loss	60
25	W31Q	STIC	pNX	NA	G3	OE	15	Was not included in the analysis
	W31P	Tumor ovary				OE	50
26	W31S	STIC	pNX	NA	G3	OE	50	Was not included in the analysis
	W31S	Tumor ovary				OE	50
27	W31U	STIC	pN1 (4/8)	NA	G3	OE	40
	W31U	Tumor ovary				OE	80
28	W31V	STIC	N0 (0/24)	NA	G3	OE	40
	W31V	Tumor ovary				OE	80
29	W31AA	STIC	pN1a (9/12)	NA	G3	OE	50
	W31AA	Tumor ovary				OE	60
30	W31AC	STIC	pN0 (0/3)	NA	G3	OE	10	Was not included in the analysis
	W31AB	Tumor ovary				OE	70
31	W31AL	STIC	pN0 (0/7)	NA	G3	loss	20
	W31AL	Tumor ovary				loss	35
32	W31G	STIC only no tumor	NA	NA	NA	OE	20	STIC stroma lost
33	W31H	STIC with Tumor	pN0 (0/17)	NA	G3	OE	40	Stroma from all components lost
	W31H	Tumor ovary				OE	60
34	W31J	STIC	pN1 (13/38)	NA	G3	OE	70	Stroma from all components lost
	W31I	Tumor greater pelvis				OE	80
35	W31T	STIC	pN0 (0/43)	NA	G3	loss	20	Tumor and tumor stroma lost
	W31T	Tumor ovary				loss	30
36	W31X	STIC 1	pNX	NA	G3	OE	40	Bilateral STIC
	W31X and W31Y	Tumor				OE	70
	W31Y	STIC 2				OE	40
