# Supplementary material for: Spatial proteomics of ovarian cancer precursors delineates early disease changes and drug targets
Source: Mol Syst Biol. 2025 Nov 13;22(1):7–41. doi: 10.1038/s44320-025-00168-4 (PMC12759074; doi:10.1038/s44320-025-00168-4)
Supplement: Supplementary file 3 — Table EV2 [file 44320_2025_168_MOESM3_ESM.xlsx]

## Sheet: Table EV2
Table EV2. Normal fallopian tube epithelium heterogeneity based on features from Dinh et al.
Name	Cluster
W30FW30D_epi	ciliiated like
W30DW30F_epi	ciliiated like
W31C_epi	ciliiated like
W31H_epi	ciliiated like
W31AA_epi	ciliiated like
W31F_epi	ciliiated like
W30B_epi	ciliiated like
W30A_epi	ciliiated like
W30M_epi	ciliiated like
W30V_epi	ciliiated like
W31IW31J_epi	ciliiated like
W29IW29J_epi	ciliiated like
W31YW31X_epi	ciliiated like
W31XW31Y_epi	ciliiated like
W29G_epi	ciliiated like
W31G_ep	ciliiated like
W30P_epi	ciliiated like
W30O_epi	ciliiated like
W30KW30J_epi	secretory like
W30JW30K_epi	secretory like
W30XW30W_epi	secretory like
W29H_epi	secretory like
W31KW31L_epi	secretory like
W30GW30H_epi	secretory like
W29EW29F_epi	secretory like
W31U_epi	secretory like
W31O_epi	secretory like
W31V_epi	secretory like
W31T_epi	secretory like
W31AL_epi	secretory like
W30C_epi	secretory like
W30L_epi	secretory like
W29C_epi	secretory like
W30E_epi	secretory like
W29AW29B_epi	secretory like
