# Supplementary material for: Spatial proteomics of ovarian cancer precursors delineates early disease changes and drug targets
Source: Mol Syst Biol. 2025 Nov 13;22(1):7–41. doi: 10.1038/s44320-025-00168-4 (PMC12759074; doi:10.1038/s44320-025-00168-4)
Supplement: Supplementary file 4 — Table EV3 [file 44320_2025_168_MOESM4_ESM.xlsx]

## Sheet: Table EV3
Table EV3. COL3A1/COL1A1 ratio from 27 stroma tissue samples. COL3A1/COL1A1 ratio is a marker of ECM stiffening, fibrosis and tumor progression.
Sample	Patient	Compartment	COL1A1_log2 protein level	COL3A1_log2 protein level	COL3A1 / COL1A1 (log2)
W29EW29F_tumorstroma	W29EW29F	invasive stroma	24.0284	19.6599	-4.3685
W31KW31L_tumorstroma	W31KW31L	invasive stroma	22.7289	18.8134	-3.9155
W29AW29B_tumorstroma	W29AW29B	invasive stroma	21.2136	17.4085	-3.8051
W30GW30H_tumorstroma	W30GW30H	invasive stroma	23.3294	19.6802	-3.6492
W29G_tumorstroma	W29G	invasive stroma	23.3638	19.8155	-3.5483
W31XW31Y_tumorstroma	W31XW31Y	invasive stroma	22.989	19.5426	-3.4464
W29IW29J_tumorstroma	W29IW29J	invasive stroma	24.0822	20.6458	-3.4364
W30DW30F_tumorstroma	W30DW30F	invasive stroma	23.133	19.7827	-3.3503
W31U_tumorstroma	W31U	invasive stroma	22.4102	19.0826	-3.3276
W30L_tumorstroma	W30L	invasive stroma	22.5325	19.2229	-3.3096
W31C_tumorstroma	W31C	invasive stroma	22.6528	19.5126	-3.1402
W31O_tumorstroma	W31O	invasive stroma	22.2703	19.1627	-3.1076
W31F_tumorstroma	W31F	invasive stroma	22.8943	19.9228	-2.9715
W30P_tumorstroma	W30P	invasive stroma	21.9333	19.0619	-2.8714
W30B_tumorstroma	W30B	invasive stroma	22.5429	19.6774	-2.8655
W30XW30W_tumorstroma	W30XW30W	invasive stroma	22.6043	19.76	-2.8443
W30C_tumorstroma	W30C	invasive stroma	22.8142	20.0413	-2.7729
W31V_tumorstroma	W31V	invasive stroma	21.6103	18.9098	-2.7005
W30FW30D_tumorstroma	W30FW30D	invasive stroma	22.5361	19.9135	-2.6226
W31AA_tumorstroma	W31AA	invasive stroma	22.5967	20.0843	-2.5124
W30M_tumorstroma	W30M	invasive stroma	22.6003	20.1303	-2.47
W30E_tumorstroma	W30E	invasive stroma	21.7519	19.3731	-2.3788
W29C_tumorstroma	W29C	invasive stroma	22.6548	20.4536	-2.2012
W29H_tumorstroma	W29H	invasive stroma	22.7345	20.5466	-2.1879
W31AL_tumorstroma	W31AL	invasive stroma	23.7789	21.7272	-2.0517
W30V_tumorstroma	W30V	invasive stroma	22.6984	20.7279	-1.9705
W30JW30K_tumorstroma	W30JW30K	invasive stroma	22.8089	20.8428	-1.9661
W31YW31X_tumorstroma	W31YW31X	invasive stroma	19.8175	17.9037	-1.9138
W30A_tumorstroma	W30A	invasive stroma	23.9741	22.109	-1.8651
W31YW31X_STICstroma	W31YW31X	STIC stroma	23.2185	19.5585	-3.66
W30XW30W_STICstroma	W30XW30W	STIC stroma	23.2955	19.8354	-3.4601
W29AW29B_STICstroma	W29AW29B	STIC stroma	22.7467	19.364	-3.3827
W31T_STICstroma	W31T	STIC stroma	20.9609	17.9438	-3.0171
W31C_STICstroma	W31C	STIC stroma	23.6441	20.7602	-2.8839
W30P_STICstroma	W30P	STIC stroma	23.6013	20.7527	-2.8486
W30M_STICstroma	W30M	STIC stroma	22.4111	19.805	-2.6061
W30B_STICstroma	W30B	STIC stroma	22.1345	19.5505	-2.584
W31V_STICstroma	W31V	STIC stroma	21.1427	18.6673	-2.4754
W31F_STICstroma	W31F	STIC stroma	22.3117	19.8716	-2.4401
W30E_STICstroma	W30E	STIC stroma	22.5111	20.0991	-2.412
W31AA_STICstroma	W31AA	STIC stroma	23.2465	21.002	-2.2445
W31U_STICstroma	W31U	STIC stroma	23.7562	21.58	-2.1762
W29IW29J_STICstroma	W29IW29J	STIC stroma	23.8593	21.7155	-2.1438
W31AL_STICstroma	W31AL	STIC stroma	23.5114	21.3711	-2.1403
W30L_STICstroma	W30L	STIC stroma	22.2111	20.1563	-2.0548
W30DW30F_STICstroma	W30DW30F	STIC stroma	23.1987	21.2085	-1.9902
W31KW31L_STICstroma	W31KW31L	STIC stroma	23.2051	21.3266	-1.8785
W30O_STICstroma	W30O	STIC stroma	23.5108	21.7471	-1.7637
W30JW30K_STICstroma	W30JW30K	STIC stroma	22.4169	20.6544	-1.7625
W30FW30D_STICstroma	W30FW30D	STIC stroma	22.4648	20.7439	-1.7209
W30C_STICstroma	W30C	STIC stroma	22.4415	20.7507	-1.6908
W31O_STICstroma	W31O	STIC stroma	23.2627	21.599	-1.6637
W29EW29F_STICstroma	W29EW29F	STIC stroma	24.014	22.4997	-1.5143
W29H_STICstroma	W29H	STIC stroma	23.1228	21.6172	-1.5056
W30KW30J_STICstroma	W30KW30J	STIC stroma	22.0646	20.6893	-1.3753
W30A_STICstroma	W30A	STIC stroma	23.949	22.6766	-1.2724
W30V_STICstroma	W30V	STIC stroma	22.9477	21.7466	-1.2011
W29G_STICstroma	W29G	STIC stroma	23.1801	22.0856	-1.0945
W30GW30H_STICstroma	W30GW30H	STIC stroma	20.1256	19.1609	-0.9647
W31F_epistroma	W31F	normal stroma	22.6287	19.3479	-3.2808
W31YW31X_epistroma	W31YW31X	normal stroma	22.6106	19.7934	-2.8172
W30P_epistroma	W30P	normal stroma	23.1204	20.3625	-2.7579
W30B_epistroma	W30B	normal stroma	22.4355	19.8775	-2.558
W30XW30W_epistroma	W30XW30W	normal stroma	23.2883	20.8644	-2.4239
W30FW30D_epistroma	W30FW30D	normal stroma	23.625	21.2989	-2.3261
W30E_epistroma	W30E	normal stroma	22.422	20.249	-2.173
W31AA_epistroma	W31AA	normal stroma	22.7785	20.6199	-2.1586
W31XW31Y_epistroma	W31XW31Y	normal stroma	22.4125	20.3056	-2.1069
W30KW30J_epistroma	W30KW30J	normal stroma	23.1012	21.0271	-2.0741
W31AL_epistroma	W31AL	normal stroma	23.7348	21.7019	-2.0329
W30JW30K_epistroma	W30JW30K	normal stroma	22.3309	20.368	-1.9629
W31V_epistroma	W31V	normal stroma	23.0887	21.1733	-1.9154
W29EW29F_epistroma	W29EW29F	normal stroma	23.7029	21.9103	-1.7926
W31T_epistroma	W31T	normal stroma	22.0715	20.3148	-1.7567
W29G_epistroma	W29G	normal stroma	23.004	21.258	-1.746
W29IW29J_epistroma	W29IW29J	normal stroma	24.431	22.7122	-1.7188
W29H_epistroma	W29H	normal stroma	23.1986	21.4855	-1.7131
W30C_epistroma	W30C	normal stroma	23.3491	21.6413	-1.7078
W31O_epistroma	W31O	normal stroma	22.6903	20.9874	-1.7029
W31C_epistroma	W31C	normal stroma	23.3912	21.7125	-1.6787
W30A_epistroma	W30A	normal stroma	23.7123	22.0881	-1.6242
W30O_epistroma	W30O	normal stroma	23.198	21.5884	-1.6096
W30V_epistroma	W30V	normal stroma	23.7575	22.154	-1.6035
W29AW29B_epistroma	W29AW29B	normal stroma	23.1444	21.5703	-1.5741
W31KW31L_epistroma	W31KW31L	normal stroma	23.2807	21.7496	-1.5311
W30L_epistroma	W30L	normal stroma	23.2419	21.7118	-1.5301
W30GW30H_epistroma	W30GW30H	normal stroma	23.2883	21.8315	-1.4568
W30M_epistroma	W30M	normal stroma	22.5239	21.1474	-1.3765
W29C_epistroma	W29C	normal stroma	23.3805	22.3146	-1.0659
W31U_epistroma	W31U	normal stroma	23.8076	22.7683	-1.0393
