# Supplementary material for: Spatial proteomics of ovarian cancer precursors delineates early disease changes and drug targets
Source: Mol Syst Biol. 2025 Nov 13;22(1):7–41. doi: 10.1038/s44320-025-00168-4 (PMC12759074; doi:10.1038/s44320-025-00168-4)
Supplement: Supplementary file 5 — Table EV4 [file 44320_2025_168_MOESM5_ESM.xlsx]

## Sheet: Table EV4
Table EV4. Data from Izar et al. A single-cell landscape of high-grade serous ovarian cancer (PMID: 32572264). Average expression levels of all genes included in the droplet-based analysis in each of the 18 clusters. Izar, B., Tirosh, I., Stover, E.H. et al. A single-cell landscape of high-grade serous ovarian cancer. Nat Med 26, 1271–1279 (2020). https://doi.org/10.1038/s41591-020-0926-0
Gene\Cluster	1	2	3	4	5	6	7	8	9	10	11	12	13	14	15	16	17	18
Cell type	Malignant	Malignant	Malignant	Malignant	Malignant	Fibroblast	Fibroblast	Fibroblast	Fibroblast	Macrophage	Macrophage	Macrophage	Macrophage	DC	DC	B cells	T cells	Erythrocytes
NNMT	3.5764	4.84067	1.06052	2.80412	2.20547	7.12832	5.25773	6.82737	6.77164	0.67423	0.21589	0.196296	0.259281	0.169905	0.0427076	0.394105	0.0477596	0.136987
FCER1A	0	0.0427309	0.362964	0	0.00478504	0	0	0.0148152	0.158985	0.386664	0.187557	0.0624145	0.00698176	4.03727	0.0612094	0.0210359	0.0334471	1.05213
FCER1G	0.507565	1.04614	1.99191	2.18051	0.320409	0.271788	1.02332	2.03321	4.37634	8.20726	9.10491	8.61689	8.49269	6.27616	1.36038	1.90453	6.15518	0.76381
F13A1	0	0.13519	0.0428315	0.200214	0.0139244	0	0	0.150629	0.167324	0.917669	0.629758	1.84938	1.18178	0.581536	0.0641122	0.0492753	0.0260948	0.124145
SYK	0	0.200213	0.0842369	0.11064	0.199139	0.0867001	0	0.0472692	0.24409	1.20325	0.746049	1.25599	0.622426	1.15716	0.438375	0.893587	0.783059	0.423495
FCGR1A	0	0	0.145001	0.156491	0	0	0.123275	0.0941768	0.562867	3.16346	2.47482	2.20795	1.61935	1.22186	0	0.00866431	0	0.140733
TYMP	2.91669	3.83317	1.84325	1.58247	2.27269	4.56657	3.23111	3.29766	4.11257	6.54311	6.80019	6.20221	5.16924	5.22969	6.6437	2.65988	0.831663	0.450896
DCK	0	0.678108	0.653443	1.1198	0.801664	1.22794	0.585715	0.51931	0.823231	0.801386	0.525929	1.03201	0.429452	1.19032	1.65542	0.41771	1.44173	3.15981
CASP3	0.276326	0.832004	0.488238	1.00639	0.670633	1.45218	0.887072	0.821311	1.16432	0.304822	0.164447	0.315383	0.212814	0.186713	0.571876	1.86808	0.591213	1.44807
