# Supplementary material for: Spatial proteomics of ovarian cancer precursors delineates early disease changes and drug targets
Source: Mol Syst Biol. 2025 Nov 13;22(1):7–41. doi: 10.1038/s44320-025-00168-4 (PMC12759074; doi:10.1038/s44320-025-00168-4)
Supplement: Supplementary file 7 — Dataset EV1 [file 44320_2025_168_MOESM7_ESM.xlsx]

## Sheet: Legend
Dataset EV 1. Results of homologous recombination deficiency (HRD) genomic analysis of tumor samples.
Purity - proportion of cancer cells in the sample compared to other cell types. Ploidy - average number of chrosome sets per cell in the samples. GIS - genomic instability score. AF - allele frequency.

## Sheet: Dataset_EV1
Dataset EV 1. Results of homologous recombination deficiency (HRD) genomic analysis of tumor samples. Purity - proportion of cancer cells in the sample compared to other cell types. Ploidy - average number of chrosome sets per cell in the samples. GIS - genomic instability score. AF - allele frequency.
Patient #	W numbers	Age	HRD	purity	ploidity	GIS	TP53 (AF %)	TP53 (AF %)	Interpretation for p53	BRCA1 (AF %)	BRCA2 (AF %)	PTEN (AF %)	ARID1A (AF %)	NBN (AF %)	RAD51D (AF %)	APC (AF %)	FANCL (AF %)	FANCE (AF %)	BARD1 (AF %)	MSH2 (AF %)	CDH1 (AF %)	KRAS (AF %)	PIK3CA
1	W29A	54	pos	0.56	3.66923	127	p.C238F (27)	p.R248Q (30)	missense (both)	p.S1253Rfs*10 (69)	WT	WT	WT	WT	WT	WT	WT	WT	WT	WT	WT	WT	WT
	W29B
2	W29C	61	neg	0.77	3.35942	53	p.R342* (12)		nonsense	WT	WT	WT	WT	WT	WT	WT	WT	WT	WT	WT	WT	WT	WT
3	W29D	47	pos	0.39	9.00087	142	p.R175H (71)		missense	WT	WT	WT	WT	WT	WT	WT	WT	WT	WT	WT	WT	WT	WT
	W31A
	W31B
4	W29E	82	neg	0.78	3.3231	77	p.R273C (85)		missense	WT	WT	p.R130Q (52)	WT	WT	WT	WT	WT	WT	WT	WT	WT	WT	WT
	W29F
5	W29G	66	NA	NA	NA	NA	NA		NA	NA	NA	NA	NA	NA	NA	NA	NA	NA	NA	NA	NA	NA	NA
6	W29H	76	neg	0.72	8.48039	68	p.P278R (84)		missense	WT	WT	WT	p.S264* (23)	WT	WT	WT	WT	WT	WT	WT	WT	WT	WT
7	W29I	72	neg	0.71	5.34891	40	p.I232Sfs*15 (84)		framshift	WT	WT	WT	WT	WT	WT	WT	WT	WT	WT	WT	WT	WT	WT
	W29J
8	W30A	72	pos	0.6	5.28215	108	p.C124Wfs*25 (60)		frameshift	WT	WT	WT	WT	WT	WT	WT	WT	WT	WT	WT	WT	WT	WT
9	W30B	44	pos	0.38	2.88117	119	p.R342* (33)		nonsense	WT	WT	WT	WT	p.K219Nfs*16 (19)	c.636+1G>T (63)	WT	WT	WT	WT	WT	WT	WT	WT
10	W30C	72	pos	0.45	8.01969	133	p.R342* (62)		nonsense	WT	p.S1882* (78)	WT	WT	WT	WT	WT	WT	WT	WT	WT	WT	WT	WT
11	W30D	61	pos	0.5	7.38853	94	p.R337C (74)		missense	WT	WT	WT	WT	WT	WT	WT	WT	WT	WT	WT	WT	WT	WT
	W30F
12	W30E	82	neg	0.38	7.18719	63	p.I255F (47)	c.768_782+12del (51)	missense / splice site	WT	WT	WT	WT	WT	WT	WT	WT	WT	WT	WT	WT	WT	WT
13	W30H	56	neg	0.95	1.99754	27	p.C176S (90)		missense	WT	WT	WT	WT	WT	WT	WT	WT	WT	WT	WT	WT	WT	WT
	W30G
14	W30J	58	neg	0.5	4.20555	54	p.W146* (59)		nonsense	WT	WT	WT	WT	WT	WT	p.S40T (65)	WT	WT	WT	WT	WT	WT	WT
	W30K
15	W30L	80	neg	0.58	9.16413	44	p.C275W (83)		missense	WT	WT	WT	WT	WT	WT	WT	WT	WT	WT	WT	WT	WT	WT
16	W30M	51	neg	0.44	4.49	58	c.994-2A>G (74)		splice site	WT	WT	WT	WT	WT	WT	WT	WT	WT	WT	WT	WT	WT	WT
17	W30O	50	pos	0.78	5.3087	101	p.E271* (85)		nonsense	WT	WT	WT	WT	WT	WT	WT	WT	WT	c.1774_1810+9del (89)	WT	WT	WT	WT
	W30P
18	W30V	56	NA	NA	NA	NA	NA		NA	NA	NA	NA	NA	NA	NA	NA	NA	NA	NA	NA	NA	NA
19	W30W (not isolated)	56	pos	0.73	2.69968	103	c.672+1G>T (68)		splice site	WT	WT	WT	WT	WT	WT	WT	WT	WT	WT	WT	WT	WT	WT
	W30X
20	W31C	54	pos	0.41	3.78132	144	p.Q165* (43)		nonsense	p.R1443* (73)	WT	WT	WT	WT	WT	WT	WT	WT	WT	WT	WT	WT	WT
21	W31D	71	neg	0.45	7.17535	66	p.Y327Fs*9 (62)		frameshift	WT	WT	WT	WT	WT	WT	WT	WT	WT	WT	WT	WT	WT	WT
	W31E
22	W31F	41	pos	0.8	1.84496	133	p.R273C (71)		missense	WT	WT	WT	WT	WT	WT	WT	WT	WT	WT	WT	WT	WT	WT
23	W31K	69	pos	0.3	7.917	86	p.R342* (59)		nonsense	WT	WT	WT	WT	WT	WT	WT	WT	WT	WT	WT	WT	WT	WT
	W31L
24	W31O	64	pos	0.31	5.44758	172	p.Q136* (46)		nonsense	WT	WT	WT	WT	WT	WT	WT	WT	WT	WT	WT	WT	WT	WT
25	W31P	74	NA	NA	NA	NA	p.R249S (6)		missense	WT	WT	WT	WT	WT	WT	WT	WT	WT	WT	WT	WT	WT	p.C240R (9)
	W31Q
26	W31R	74	NA	NA	NA	NA	p.F134L (29)		missense	WT	WT	WT	WT	WT	WT	WT	WT	WT	WT	WT	WT	WT	WT
	W31S
27	W31U	69	pos	0.62	1.92616	125	p.S241F (72)		missense	WT	WT	WT	WT	WT	WT	WT	WT	WT	WT	WT	WT	WT	WT
28	W31V	56	pos	0.61	2.72171	129	p.Y163C (58)		missense	p.N343Kfs*6 (37)	WT	WT	WT	WT	WT	WT	WT	WT	WT	WT	WT	WT	WT
29	W31AA	51	neg	0.55	9.21018	66	p.F134I (73)		missense	WT	WT	WT	WT	WT	WT	WT	WT	WT	WT	WT	WT	WT	WT
30	W31AB	63	neg	0.65	2.66198	36	p.R342* (64)		nonsense	WT	WT	WT	WT	WT	WT	WT	WT	WT	WT	p.R680Q (64)	c.2164+3_2164+6del (64)	WT	WT
	W31AC
31	W31AL	81	NA	NA	NA	NA	p.T231P (23)	p.H233Qfs*24 (19)	missense/frame shift	WT	WT	WT	WT	WT	WT	WT	WT	WT	WT	WT	WT	WT	WT
32	W31G	64	NA	NA	NA	NA	NA		NA	NA	NA	NA	NA	NA	NA	NA	NA	NA	NA	NA	NA	NA	NA
33	W31H	71	pos	0.56	2.73849	87	p.R175H (62)		missense	WT	WT	WT	WT	WT	WT	WT	WT	WT	WT	WT	WT	p.T2_M67del (18)	WT
34	W31I	51	neg	0.5	2.67994	14	p.Y220C (62)		missense	WT	WT	WT	WT	WT	WT	WT	WT	WT	WT	WT	WT	WT	WT
	W31J
35	W31T	73	NA	NA	NA	NA	NA		NA	NA	NA	NA	NA	NA	NA	NA	NA	NA	NA	NA	NA	NA	NA
36	W31X	47	neg	0.5	5.19102	15	p.L194H (62)		missense	WT	WT	WT	WT	WT	WT	WT	WT	WT	WT	WT	WT	WT	WT
	W31Y
