# Supplementary material for: Spatial proteomics of ovarian cancer precursors delineates early disease changes and drug targets
Source: Mol Syst Biol. 2025 Nov 13;22(1):7–41. doi: 10.1038/s44320-025-00168-4 (PMC12759074; doi:10.1038/s44320-025-00168-4)
Supplement: Supplementary file 8 — Dataset EV2 [file 44320_2025_168_MOESM8_ESM.xlsx]

## Sheet: Legend
Dataset EV2. Median raw intensity values for each identified protein in STIC samples. Intensities are reported in arbitrary units as generated by DIA-NN software without normalization. Only proteins quantified in at least 15 replicates across all corresponding samples were included.

## Sheet: Dataset EV2
Protein Name	Protein IDs	Protein Group	Genes	First protein description	Median Intensity
H2B1C_HUMAN;H2B1D_HUMAN;H2B1H_HUMAN;H2B1K_HUMAN;H2B1M_HUMAN;H2B1N_HUMAN;H2B2F_HUMAN	Q99879;P57053;Q5QNW6;Q16778;O60814;P62807;P23527;P06899;Q99880;Q99877;P33778;Q93079;Q8N257;Q96A08;P58876	O60814;P58876;P62807;Q5QNW6;Q93079;Q99877;Q99879	H2BC10;H2BC12;H2BC14;H2BC15;H2BC18;H2BC5;H2BC9	Histone H2B type 1-K	6757750
H4_HUMAN	P62805	P62805	H4C16	Histone H4	6626230
TBB2B_HUMAN	Q13885;Q9BVA1	Q9BVA1	TUBB2B	Tubulin beta-2B chain	3083490
H2A1D_HUMAN	P0C0S8;P04908;Q6FI13;P20671;Q9BTM1;Q99878;Q7L7L0;Q93077;Q16777;Q96KK5	P20671	H2AC7	Histone H2A type 1-D	3028790
H37_HUMAN	P84243;Q5TEC6;Q71DI3;P68431;Q6NXT2;Q16695	Q5TEC6	H3-7	Histone H3-7	2991490
RS27A_HUMAN	P0CG47;P0CG48;P62979;P62987	P62979	RPS27A	Ubiquitin-ribosomal protein eS31 fusion protein	2557550
TBB4B_HUMAN	Q3ZCM7;P68371	P68371	TUBB4B	Tubulin beta-4B chain	2311550
PRDX1_HUMAN	Q06830	Q06830	PRDX1	Peroxiredoxin-1	2294100
HBB_HUMAN	P68871;P02042	P68871	HBB	Hemoglobin subunit beta	2033010
KPYM_HUMAN	P14618	P14618	PKM	Pyruvate kinase PKM	1945790
ENOA_HUMAN	P06733	P06733	ENO1	Alpha-enolase	1630020
ROA2_HUMAN	P22626	P22626	HNRNPA2B1	Heterogeneous nuclear ribonucleoproteins A2/B1	1589340
PPIA_HUMAN	P62937	P62937	PPIA	Peptidyl-prolyl cis-trans isomerase A	1548030
1433E_HUMAN	P62258	P62258	YWHAE	14-3-3 protein epsilon	1420490
ATPB_HUMAN	P06576	P06576	ATP5F1B	ATP synthase subunit beta, mitochondrial	1404080
PRDX6_HUMAN	P30041	P30041	PRDX6	Peroxiredoxin-6	1301430
G3P_HUMAN	P04406	P04406	GAPDH	Glyceraldehyde-3-phosphate dehydrogenase	1231580
HS90B_HUMAN	P08238	P08238	HSP90AB1	Heat shock protein HSP 90-beta	1215600
PRDX5_HUMAN	P30044	P30044	PRDX5	Peroxiredoxin-5, mitochondrial	1197390
HBA_HUMAN	P69905	P69905	HBA2	Hemoglobin subunit alpha	1173990
H14_HUMAN	Q02539;P16402;P10412;P16401;P16403	P10412	H1-4	Histone H1.4	1118740
HSPB1_HUMAN	P04792	P04792	HSPB1	Heat shock protein beta-1	1112100
ALBU_HUMAN	P02768	P02768	ALB	Albumin	1111000
HSP7C_HUMAN	P11142;P54652	P11142	HSPA8	Heat shock cognate 71 kDa protein	1093760
ANXA2_HUMAN	P07355;A6NMY6	P07355	ANXA2	Annexin A2	1077220
ENPL_HUMAN	P14625	P14625	HSP90B1	Endoplasmin	1040410
HS90A_HUMAN	P07900	P07900	HSP90AA1	Heat shock protein HSP 90-alpha	1033820
EF1G_HUMAN	P26641	P26641	EEF1G	Elongation factor 1-gamma	999464
BIP_HUMAN	P11021	P11021	HSPA5	Endoplasmic reticulum chaperone BiP	998196
IDHP_HUMAN	P48735	P48735	IDH2	Isocitrate dehydrogenase [NADP], mitochondrial	968587
HSP76_HUMAN	P48741;P17066	P17066	HSPA6	Heat shock 70 kDa protein 6	912768
CH10_HUMAN	P61604	P61604	HSPE1	10 kDa heat shock protein, mitochondrial	912172
CALM1_HUMAN;CALM2_HUMAN;CALM3_HUMAN	P0DP24;P0DP25;P0DP23	P0DP23;P0DP24;P0DP25	CALM1;CALM2;CALM3	Calmodulin-1	910583
HS71A_HUMAN;HS71B_HUMAN	P0DMV9;P0DMV8	P0DMV8;P0DMV9	HSPA1A;HSPA1B	Heat shock 70 kDa protein 1A	909099
ACTN4_HUMAN	O43707	O43707	ACTN4	Alpha-actinin-4	903909
NUCL_HUMAN	P19338	P19338	NCL	Nucleolin	898571
ATPA_HUMAN	P25705	P25705	ATP5F1A	ATP synthase subunit alpha, mitochondrial	888316
SRSF6_HUMAN	Q13247	Q13247	SRSF6	Serine/arginine-rich splicing factor 6	798620
ROA1_HUMAN	A0A2R8Y4L2;P09651	P09651	HNRNPA1	Heterogeneous nuclear ribonucleoprotein A1	784532
MDHM_HUMAN	P40926	P40926	MDH2	Malate dehydrogenase, mitochondrial	740408
DX39B_HUMAN	Q13838;O00148	Q13838	DDX39B	Spliceosome RNA helicase DDX39B	731189
ANXA5_HUMAN	P08758	P08758	ANXA5	Annexin A5	722788
ADT2_HUMAN	P05141;P12236;P12235;Q9H0C2	P05141	SLC25A5	ADP/ATP translocase 2	720148
CH60_HUMAN	P10809	P10809	HSPD1	60 kDa heat shock protein, mitochondrial	716244
MYL6_HUMAN	P60660	P60660	MYL6	Myosin light polypeptide 6	710041
IF4A1_HUMAN	P60842	P60842	EIF4A1	Eukaryotic initiation factor 4A-I	687738
LMNA_HUMAN	P02545	P02545	LMNA	Prelamin-A/C	666422
EFTU_HUMAN	P49411	P49411	TUFM	Elongation factor Tu, mitochondrial	662716
NONO_HUMAN	Q15233	Q15233	NONO	Non-POU domain-containing octamer-binding protein	646899
RL13_HUMAN	P26373	P26373	RPL13	Large ribosomal subunit protein eL13	643232
H33_HUMAN	P84243;Q71DI3;P68431;Q6NXT2;Q16695	P84243	H3-3B	Histone H3.3	640263
PDIA3_HUMAN	P30101	P30101	PDIA3	Protein disulfide-isomerase A3	637429
HP1B3_HUMAN	Q5SSJ5	Q5SSJ5	HP1BP3	Heterochromatin protein 1-binding protein 3	625694
MYH9_HUMAN	P35579	P35579	MYH9	Myosin-9	625036
RACK1_HUMAN	P63244	P63244	RACK1	Small ribosomal subunit protein RACK1	624530
COF1_HUMAN	Q9Y281;P23528	P23528	CFL1	Cofilin-1	587315
PRDX3_HUMAN	P30048	P30048	PRDX3	Thioredoxin-dependent peroxide reductase, mitochondrial	576331
TPIS_HUMAN	P60174	P60174	TPI1	Triosephosphate isomerase	576072
S25A3_HUMAN	Q00325	Q00325	SLC25A3	Solute carrier family 25 member 3	573470
MOES_HUMAN	P15311;P35241;P26038	P26038	MSN	Moesin	568558
S10A6_HUMAN	P06703	P06703	S100A6	Protein S100-A6	559335
RS9_HUMAN	P46781	P46781	RPS9	Small ribosomal subunit protein uS4	557007
HNRPC_HUMAN	P07910	P07910	HNRNPC	Heterogeneous nuclear ribonucleoproteins C1/C2	551546
GRP75_HUMAN	P38646	P38646	HSPA9	Stress-70 protein, mitochondrial	549424
HNRPU_HUMAN	Q00839	Q00839	HNRNPU	Heterogeneous nuclear ribonucleoprotein U	540399
SRSF3_HUMAN	P84103	P84103	SRSF3	Serine/arginine-rich splicing factor 3	531320
EF2_HUMAN	P13639	P13639	EEF2	Elongation factor 2	517600
RL27A_HUMAN	P46776	P46776	RPL27A	Large ribosomal subunit protein uL15	506724
COX2_HUMAN	P00403	P00403	MT-CO2	Cytochrome c oxidase subunit 2	505359
TAGL2_HUMAN	P37802	P37802	TAGLN2	Transgelin-2	502810
RL6_HUMAN	Q02878	Q02878	RPL6	Large ribosomal subunit protein eL6	502332
PRDX2_HUMAN	P32119	P32119	PRDX2	Peroxiredoxin-2	502016
PHB2_HUMAN	Q99623	Q99623	PHB2	Prohibitin-2	501988
PHB1_HUMAN	P35232	P35232	PHB1	Prohibitin 1	499860
PPIB_HUMAN	P23284	P23284	PPIB	Peptidyl-prolyl cis-trans isomerase B	480798
GSTP1_HUMAN	P09211	P09211	GSTP1	Glutathione S-transferase P	479757
NDKA_HUMAN	P15531	P15531	NME1	Nucleoside diphosphate kinase A	474854
LEG3_HUMAN	P17931	P17931	LGALS3	Galectin-3	472505
SAHH_HUMAN	P23526	P23526	AHCY	Adenosylhomocysteinase	468297
SMD3_HUMAN	P62318	P62318	SNRPD3	Small nuclear ribonucleoprotein Sm D3	467171
SSBP_HUMAN	Q04837	Q04837	SSBP1	Single-stranded DNA-binding protein, mitochondrial	461975
LDHA_HUMAN	P00338	P00338	LDHA	L-lactate dehydrogenase A chain	456976
UBA1_HUMAN	P22314	P22314	UBA1	Ubiquitin-like modifier-activating enzyme 1	452266
DYHC1_HUMAN	Q14204	Q14204	DYNC1H1	Cytoplasmic dynein 1 heavy chain 1	451079
RS28_HUMAN	P62857	P62857	RPS28	Small ribosomal subunit protein eS28	442382
HNRPK_HUMAN	P61978	P61978	HNRNPK	Heterogeneous nuclear ribonucleoprotein K	440985
CLIC1_HUMAN	O00299	O00299	CLIC1	Chloride intracellular channel protein 1	440258
GANAB_HUMAN	Q14697	Q14697	GANAB	Neutral alpha-glucosidase AB	436999
TBA4B_HUMAN	Q9H853	Q9H853	TUBA4B	Putative tubulin-like protein alpha-4B	436327
SBP1_HUMAN	Q13228	Q13228	SELENBP1	Methanethiol oxidase	434857
IPYR_HUMAN	Q15181	Q15181	PPA1	Inorganic pyrophosphatase	434460
RET1_HUMAN	P09455	P09455	RBP1	Retinol-binding protein 1	429811
TKT_HUMAN	P29401	P29401	TKT	Transketolase	428707
RSSA_HUMAN	A0A8I5KQE6;P08865	P08865	RPSA	Small ribosomal subunit protein uS2	428036
IGHG1_HUMAN	P01859;P01857	P01857	IGHG1	Immunoglobulin heavy constant gamma 1	427216
ECHB_HUMAN	P55084	P55084	HADHB	Trifunctional enzyme subunit beta, mitochondrial	427067
H2B3B_HUMAN	Q8N257	Q8N257	H2BC26	Histone H2B type 3-B	426256
LMNB1_HUMAN	P20700	P20700	LMNB1	Lamin-B1	426054
ANXA1_HUMAN	P04083	P04083	ANXA1	Annexin A1	426045
TCP4_HUMAN	P53999	P53999	SUB1	Activated RNA polymerase II transcriptional coactivator p15	425130
PGK1_HUMAN	P00558	P00558	PGK1	Phosphoglycerate kinase 1	421778
RS18_HUMAN	P62269	P62269	RPS18	Small ribosomal subunit protein uS13	421200
TIF1B_HUMAN	Q13263	Q13263	TRIM28	Transcription intermediary factor 1-beta	419147
H2AY_HUMAN	O75367	O75367	MACROH2A1	Core histone macro-H2A.1	418728
APEX1_HUMAN	P27695	P27695	APEX1	DNA-(apurinic or apyrimidinic site) endonuclease	415049
RL10A_HUMAN	P62906	P62906	RPL10A	Large ribosomal subunit protein uL1	414657
SET_HUMAN	P0DME0;Q01105	Q01105	SET	Protein SET	410680
H2A2B_HUMAN	P0C0S8;P04908;Q6FI13;P20671;Q9BTM1;Q96QV6;Q99878;Q7L7L0;Q8IUE6;P16104;Q93077;Q16777;Q96KK5	Q8IUE6	H2AC21	Histone H2A type 2-B	406928
SRSF7_HUMAN	Q16629	Q16629	SRSF7	Serine/arginine-rich splicing factor 7	406434
DDX17_HUMAN	Q92841	Q92841	DDX17	Probable ATP-dependent RNA helicase DDX17	405738
NPM_HUMAN	P06748	P06748	NPM1	Nucleophosmin	399113
BCAM_HUMAN	P50895	P50895	BCAM	Basal cell adhesion molecule	398280
RS3_HUMAN	P23396	P23396	RPS3	Small ribosomal subunit protein uS3	391391
RS14_HUMAN	P62263	P62263	RPS14	Small ribosomal subunit protein uS11	390473
EF1D_HUMAN	P29692	P29692	EEF1D	Elongation factor 1-delta	389978
ACTBL_HUMAN	Q562R1	Q562R1	ACTBL2	Beta-actin-like protein 2	388822
PCBP1_HUMAN	Q15365	Q15365	PCBP1	Poly(rC)-binding protein 1	382415
FUS_HUMAN	P35637	P35637	FUS	RNA-binding protein FUS	380677
SRSF2_HUMAN	Q01130	Q01130	SRSF2	Serine/arginine-rich splicing factor 2	379489
FLNA_HUMAN	P21333	P21333	FLNA	Filamin-A	376870
RL7_HUMAN	P18124	P18124	RPL7	Large ribosomal subunit protein uL30	376700
HNRH1_HUMAN	P31943	P31943	HNRNPH1	Heterogeneous nuclear ribonucleoprotein H	376071
CNDP2_HUMAN	Q96KP4	Q96KP4	CNDP2	Cytosolic non-specific dipeptidase	369666
ALDOA_HUMAN	P04075	P04075	ALDOA	Fructose-bisphosphate aldolase A	369047
MIF_HUMAN	P14174	P14174	MIF	Macrophage migration inhibitory factor	367721
STIP1_HUMAN	P31948	P31948	STIP1	Stress-induced-phosphoprotein 1	367481
RPN1_HUMAN	P04843	P04843	RPN1	Dolichyl-diphosphooligosaccharide--protein glycosyltransferase subunit 1	366582
H10_HUMAN	P07305	P07305	H1-0	Histone H1.0	364784
CO1A1_HUMAN	P02452	P02452	COL1A1	Collagen alpha-1(I) chain	361585
FBRL_HUMAN	P22087	P22087	FBL	rRNA 2'-O-methyltransferase fibrillarin	360753
RL14_HUMAN	P50914	P50914	RPL14	Large ribosomal subunit protein eL14	357660
RS6_HUMAN	P62753	P62753	RPS6	Small ribosomal subunit protein eS6	350965
VINC_HUMAN	P18206	P18206	VCL	Vinculin	345861
AT1A1_HUMAN	P05023	P05023	ATP1A1	Sodium/potassium-transporting ATPase subunit alpha-1	344249
TBA1C_HUMAN	P68363;Q9BQE3;Q71U36	Q9BQE3	TUBA1C	Tubulin alpha-1C chain	341168
AHNK_HUMAN	Q09666	Q09666	AHNAK	Neuroblast differentiation-associated protein AHNAK	337494
RLA2_HUMAN	P05387	P05387	RPLP2	Large ribosomal subunit protein P2	335844
HNRPR_HUMAN	O43390	O43390	HNRNPR	Heterogeneous nuclear ribonucleoprotein R	328646
PSA1_HUMAN	P25786	P25786	PSMA1	Proteasome subunit alpha type-1	327731
RL15_HUMAN	P61313	P61313	RPL15	Large ribosomal subunit protein eL15	327376
DESP_HUMAN	P15924	P15924	DSP	Desmoplakin	326337
H15_HUMAN	P16401	P16401	H1-5	Histone H1.5	325902
MDHC_HUMAN	P40925	P40925	MDH1	Malate dehydrogenase, cytoplasmic	325672
MATR3_HUMAN	P43243	P43243	MATR3	Matrin-3	325218
ATPO_HUMAN	P48047	P48047	ATP5PO	ATP synthase subunit O, mitochondrial	323401
PARP1_HUMAN	P09874	P09874	PARP1	Poly [ADP-ribose] polymerase 1	320389
RL31_HUMAN	P62899	P62899	RPL31	Large ribosomal subunit protein eL31	319346
A1AT_HUMAN	P01009	P01009	SERPINA1	Alpha-1-antitrypsin	316933
CLH1_HUMAN	P53675;Q00610	Q00610	CLTC	Clathrin heavy chain 1	316403
ARPC4_HUMAN	P59998	P59998	ARPC4	Actin-related protein 2/3 complex subunit 4	303004
RS15A_HUMAN	P62244	P62244	RPS15A	Small ribosomal subunit protein uS8	300972
LGUL_HUMAN	Q04760	Q04760	GLO1	Lactoylglutathione lyase	299606
ROA3_HUMAN	P51991	P51991	HNRNPA3	Heterogeneous nuclear ribonucleoprotein A3	299411
IMB1_HUMAN	Q14974	Q14974	KPNB1	Importin subunit beta-1	299110
RL18_HUMAN	Q07020	Q07020	RPL18	Large ribosomal subunit protein eL18	297669
PEBP1_HUMAN	P30086	P30086	PEBP1	Phosphatidylethanolamine-binding protein 1	297339
PDIA6_HUMAN	Q15084	Q15084	PDIA6	Protein disulfide-isomerase A6	296684
ARP2_HUMAN	P61160	P61160	ACTR2	Actin-related protein 2	295088
ATPG_HUMAN	P36542	P36542	ATP5F1C	ATP synthase subunit gamma, mitochondrial	293013
XRCC5_HUMAN	P13010	P13010	XRCC5	X-ray repair cross-complementing protein 5	291853
SERA_HUMAN	O43175	O43175	PHGDH	D-3-phosphoglycerate dehydrogenase	290876
NAT10_HUMAN	Q9H0A0	Q9H0A0	NAT10	RNA cytidine acetyltransferase	288062
DHX9_HUMAN	Q08211	Q08211	DHX9	ATP-dependent RNA helicase A	287030
SFPQ_HUMAN	P23246	P23246	SFPQ	Splicing factor, proline- and glutamine-rich	286733
RL22_HUMAN	P35268	P35268	RPL22	Large ribosomal subunit protein eL22	285810
PPAC_HUMAN	P24666	P24666	ACP1	Low molecular weight phosphotyrosine protein phosphatase	284440
FUBP2_HUMAN	Q92945	Q92945	KHSRP	Far upstream element-binding protein 2	283625
PLEC_HUMAN	Q15149	Q15149	PLEC	Plectin	283536
RS25_HUMAN	P62851	P62851	RPS25	Small ribosomal subunit protein eS25	281741
SORCN_HUMAN	P30626	P30626	SRI	Sorcin	281657
PSME1_HUMAN	Q06323	Q06323	PSME1	Proteasome activator complex subunit 1	281372
AATM_HUMAN	P00505	P00505	GOT2	Aspartate aminotransferase, mitochondrial	281014
HNRPD_HUMAN	Q14103	Q14103	HNRNPD	Heterogeneous nuclear ribonucleoprotein D0	280792
RAB7A_HUMAN	P51149	P51149	RAB7A	Ras-related protein Rab-7a	279745
IDHC_HUMAN	O75874	O75874	IDH1	Isocitrate dehydrogenase [NADP] cytoplasmic	279509
XRCC6_HUMAN	P12956	P12956	XRCC6	X-ray repair cross-complementing protein 6	279479
PRKDC_HUMAN	P78527	P78527	PRKDC	DNA-dependent protein kinase catalytic subunit	279448
RLA1_HUMAN	P05386	P05386	RPLP1	Large ribosomal subunit protein P1	279337
RL35A_HUMAN	P18077	P18077	RPL35A	Large ribosomal subunit protein eL33	277410
HNRPM_HUMAN	P52272	P52272	HNRNPM	Heterogeneous nuclear ribonucleoprotein M	277092
VDAC2_HUMAN	P45880	P45880	VDAC2	Voltage-dependent anion-selective channel protein 2	274542
CISY_HUMAN	O75390	O75390	CS	Citrate synthase, mitochondrial	270975
TPM3_HUMAN	P06753	P06753	TPM3	Tropomyosin alpha-3 chain	268825
TERA_HUMAN	P55072	P55072	VCP	Transitional endoplasmic reticulum ATPase	268159
PDLI1_HUMAN	O00151	O00151	PDLIM1	PDZ and LIM domain protein 1	267757
TCPQ_HUMAN	P50990	P50990	CCT8	T-complex protein 1 subunit theta	265437
RINI_HUMAN	P13489	P13489	RNH1	Ribonuclease inhibitor	264145
ML12A_HUMAN;ML12B_HUMAN	P19105;O14950	O14950;P19105	MYL12A;MYL12B	Myosin regulatory light chain 12B	263043
TCPG_HUMAN	P49368	P49368	CCT3	T-complex protein 1 subunit gamma	262700
IGHG2_HUMAN	P01859	P01859	IGHG2	Immunoglobulin heavy constant gamma 2	262512
RAB1B_HUMAN	P62820;Q9H0U4	Q9H0U4	RAB1B	Ras-related protein Rab-1B	261574
HPT_HUMAN	P00738	P00738	HP	Haptoglobin	259953
SERPH_HUMAN	P50454	P50454	SERPINH1	Serpin H1	259941
RL8_HUMAN	P62917	P62917	RPL8	Large ribosomal subunit protein uL2	259114
ASSY_HUMAN	P00966	P00966	ASS1	Argininosuccinate synthase	259064
S10AB_HUMAN	P31949	P31949	S100A11	Protein S100-A11	256376
LAMP2_HUMAN	P13473	P13473	LAMP2	Lysosome-associated membrane glycoprotein 2	256087
RAN_HUMAN	P62826	P62826	RAN	GTP-binding nuclear protein Ran	255646
HDGF_HUMAN	P51858	P51858	HDGF	Hepatoma-derived growth factor	254999
IQGA1_HUMAN	P46940	P46940	IQGAP1	Ras GTPase-activating-like protein IQGAP1	254502
GDIB_HUMAN	P50395	P50395	GDI2	Rab GDP dissociation inhibitor beta	252510
OST48_HUMAN	P39656	P39656	DDOST	Dolichyl-diphosphooligosaccharide--protein glycosyltransferase 48 kDa subunit	252070
PSB2_HUMAN	P49721	P49721	PSMB2	Proteasome subunit beta type-2	250890
RS4X_HUMAN	P62701;Q8TD47	P62701	RPS4X	Small ribosomal subunit protein eS4, X isoform	249986
PSA4_HUMAN	P25789	P25789	PSMA4	Proteasome subunit alpha type-4	249890
ARF4_HUMAN	P18085	P18085	ARF4	ADP-ribosylation factor 4	249691
KATL2_HUMAN	Q8IYT4	Q8IYT4	KATNAL2	Katanin p60 ATPase-containing subunit A-like 2	249656
LG3BP_HUMAN	Q08380	Q08380	LGALS3BP	Galectin-3-binding protein	249619
PA1B3_HUMAN	Q15102	Q15102	PAFAH1B3	Platelet-activating factor acetylhydrolase IB subunit alpha1	249075
RLA0_HUMAN	P05388	P05388	RPLP0	Large ribosomal subunit protein uL10	248000
LAP2A_HUMAN	P42166	P42166	TMPO	Lamina-associated polypeptide 2, isoform alpha	244950
CAN1_HUMAN	P07384	P07384	CAPN1	Calpain-1 catalytic subunit	244147
SND1_HUMAN	Q7KZF4	Q7KZF4	SND1	Staphylococcal nuclease domain-containing protein 1	243131
AL7A1_HUMAN	P49419	P49419	ALDH7A1	Alpha-aminoadipic semialdehyde dehydrogenase	242822
NOP56_HUMAN	O00567	O00567	NOP56	Nucleolar protein 56	242742
CATD_HUMAN	P07339	P07339	CTSD	Cathepsin D	241112
6PGL_HUMAN	O95336	O95336	PGLS	6-phosphogluconolactonase	240521
LMNB2_HUMAN	Q03252	Q03252	LMNB2	Lamin-B2	239998
RAB15_HUMAN	P59190	P59190	RAB15	Ras-related protein Rab-15	238872
ESYT1_HUMAN	Q9BSJ8	Q9BSJ8	ESYT1	Extended synaptotagmin-1	235195
QCR1_HUMAN	P31930	P31930	UQCRC1	Cytochrome b-c1 complex subunit 1, mitochondrial	233018
H2AV_HUMAN;H2AZ_HUMAN	P0C0S5;Q71UI9	P0C0S5;Q71UI9	H2AZ1;H2AZ2	Histone H2A.Z	232489
AMPL_HUMAN	P28838	P28838	LAP3	Cytosol aminopeptidase	232165
FUBP1_HUMAN	Q96AE4	Q96AE4	FUBP1	Far upstream element-binding protein 1	229603
PA2G4_HUMAN	Q9UQ80	Q9UQ80	PA2G4	Proliferation-associated protein 2G4	229301
PGAM1_HUMAN	P18669	P18669	PGAM1	Phosphoglycerate mutase 1	228963
ARPC3_HUMAN	O15145	O15145	ARPC3	Actin-related protein 2/3 complex subunit 3	228338
RS16_HUMAN	P62249	P62249	RPS16	Small ribosomal subunit protein uS9	227877
CRIP1_HUMAN	P50238	P50238	CRIP1	Cysteine-rich protein 1	227478
HCD2_HUMAN	Q99714	Q99714	HSD17B10	3-hydroxyacyl-CoA dehydrogenase type-2	227198
ELAV1_HUMAN	Q15717	Q15717	ELAVL1	ELAV-like protein 1	227126
RS26_HUMAN	Q5JNZ5;P62854	P62854	RPS26	Small ribosomal subunit protein eS26	226092
RBMX_HUMAN	P38159;Q96E39	P38159	RBMX	RNA-binding motif protein, X chromosome	225831
TCPA_HUMAN	P17987	P17987	TCP1	T-complex protein 1 subunit alpha	225481
HMGB1_HUMAN	P09429;P26583	P09429	HMGB1	High mobility group protein B1	224687
RAC1_HUMAN	P15153;P60763;P63000	P63000	RAC1	Ras-related C3 botulinum toxin substrate 1	224466
RS8_HUMAN	P62241	P62241	RPS8	Small ribosomal subunit protein eS8	223901
APT_HUMAN	P07741	P07741	APRT	Adenine phosphoribosyltransferase	220525
CUTA_HUMAN	O60888	O60888	CUTA	Protein CutA	220357
LASP1_HUMAN	Q14847	Q14847	LASP1	LIM and SH3 domain protein 1	219632
GDIR1_HUMAN	P52565	P52565	ARHGDIA	Rho GDP-dissociation inhibitor 1	218132
PGRC1_HUMAN	O00264	O00264	PGRMC1	Membrane-associated progesterone receptor component 1	217136
G6PI_HUMAN	P06744	P06744	GPI	Glucose-6-phosphate isomerase	216701
PABP1_HUMAN	P11940;Q4VXU2	P11940	PABPC1	Polyadenylate-binding protein 1	216521
ILF3_HUMAN	Q96SI9;Q12906	Q12906	ILF3	Interleukin enhancer-binding factor 3	215945
SCMC1_HUMAN	Q6NUK1	Q6NUK1	SLC25A24	Mitochondrial adenyl nucleotide antiporter SLC25A24	215850
TCPB_HUMAN	P78371	P78371	CCT2	T-complex protein 1 subunit beta	215623
CAND1_HUMAN	Q86VP6	Q86VP6	CAND1	Cullin-associated NEDD8-dissociated protein 1	213288
RS13_HUMAN	P62277	P62277	RPS13	Small ribosomal subunit protein uS15	213170
PGK2_HUMAN	P07205	P07205	PGK2	Phosphoglycerate kinase 2	212614
IGHA1_HUMAN	P01877;P01876	P01876	IGHA1	Immunoglobulin heavy constant alpha 1	211650
IF4A3_HUMAN	P38919	P38919	EIF4A3	Eukaryotic initiation factor 4A-III	211554
RB11B_HUMAN	P62491;Q15907	Q15907	RAB11B	Ras-related protein Rab-11B	210398
RS2_HUMAN	P15880	P15880	RPS2	Small ribosomal subunit protein uS5	209024
PCBP2_HUMAN	Q15366	Q15366	PCBP2	Poly(rC)-binding protein 2	207887
ASGL1_HUMAN	Q7L266	Q7L266	ASRGL1	Isoaspartyl peptidase/L-asparaginase	206377
FXR1_HUMAN	P51114	P51114	FXR1	RNA-binding protein FXR1	206226
RL35_HUMAN	P42766	P42766	RPL35	Large ribosomal subunit protein uL29	205395
ANX11_HUMAN	P50995	P50995	ANXA11	Annexin A11	204368
GNAI2_HUMAN	P04899	P04899	GNAI2	Guanine nucleotide-binding protein G(i) subunit alpha-2	204164
CAZA1_HUMAN	P52907;P47755	P52907	CAPZA1	F-actin-capping protein subunit alpha-1	202761
ARF1_HUMAN;ARF3_HUMAN	P61204;P84077	P61204;P84077	ARF1;ARF3	ADP-ribosylation factor 3	202628
UB2V1_HUMAN	Q13404	Q13404	UBE2V1	Ubiquitin-conjugating enzyme E2 variant 1	201620
SRSF1_HUMAN	Q07955	Q07955	SRSF1	Serine/arginine-rich splicing factor 1	201225
COPA_HUMAN	P53621	P53621	COPA	Coatomer subunit alpha	201161
HBD_HUMAN	P02042	P02042	HBD	Hemoglobin subunit delta	200796
OTUB1_HUMAN	Q96FW1	Q96FW1	OTUB1	Ubiquitin thioesterase OTUB1	199731
CO6A3_HUMAN	P12111	P12111	COL6A3	Collagen alpha-3(VI) chain	199290
IF4H_HUMAN	Q15056	Q15056	EIF4H	Eukaryotic translation initiation factor 4H	199210
ACON_HUMAN	Q99798	Q99798	ACO2	Aconitate hydratase, mitochondrial	199076
KAD3_HUMAN	Q9UIJ7	Q9UIJ7	AK3	GTP:AMP phosphotransferase AK3, mitochondrial	198181
1433B_HUMAN	P31946	P31946	YWHAB	14-3-3 protein beta/alpha	198152
RL7A_HUMAN	P62424	P62424	RPL7A	Large ribosomal subunit protein eL8	198082
KAD2_HUMAN	P54819	P54819	AK2	Adenylate kinase 2, mitochondrial	197083
SLIRP_HUMAN	Q9GZT3	Q9GZT3	SLIRP	SRA stem-loop-interacting RNA-binding protein, mitochondrial	195997
PLAK_HUMAN	P14923	P14923	JUP	Junction plakoglobin	195899
RL4_HUMAN	P36578	P36578	RPL4	Large ribosomal subunit protein uL4	195053
CTND1_HUMAN	O60716	O60716	CTNND1	Catenin delta-1	193484
LPPRC_HUMAN	P42704	P42704	LRPPRC	Leucine-rich PPR motif-containing protein, mitochondrial	192202
GET3_HUMAN	O43681	O43681	GET3	ATPase GET3	191827
ODPA_HUMAN	P08559;P29803	P08559	PDHA1	Pyruvate dehydrogenase E1 component subunit alpha, somatic form, mitochondrial	190075
SPTN1_HUMAN	Q13813	Q13813	SPTAN1	Spectrin alpha chain, non-erythrocytic 1	190008
SMD2_HUMAN	P62316	P62316	SNRPD2	Small nuclear ribonucleoprotein Sm D2	189872
RL12_HUMAN	P30050	P30050	RPL12	Large ribosomal subunit protein uL11	188322
ATPK_HUMAN	P56134	P56134	ATP5MF	ATP synthase subunit f, mitochondrial	188187
PDIA4_HUMAN	P13667	P13667	PDIA4	Protein disulfide-isomerase A4	187702
TRFE_HUMAN	P02787	P02787	TF	Serotransferrin	187453
STMN1_HUMAN	P16949	P16949	STMN1	Stathmin	186514
CAPG_HUMAN	P40121	P40121	CAPG	Macrophage-capping protein	185526
MAL2_HUMAN	Q969L2	Q969L2	MAL2	Protein MAL2	184877
DAD1_HUMAN	P61803	P61803	DAD1	Dolichyl-diphosphooligosaccharide--protein glycosyltransferase subunit DAD1	183755
DDAH2_HUMAN	O95865	O95865	DDAH2	N(G),N(G)-dimethylarginine dimethylaminohydrolase 2	183646
AIFM1_HUMAN	O95831	O95831	AIFM1	Apoptosis-inducing factor 1, mitochondrial	182500
RPN2_HUMAN	P04844	P04844	RPN2	Dolichyl-diphosphooligosaccharide--protein glycosyltransferase subunit 2	182415
WDR1_HUMAN	O75083	O75083	WDR1	WD repeat-containing protein 1	181803
API5_HUMAN	Q9BZZ5	Q9BZZ5	API5	Apoptosis inhibitor 5	181482
LRC47_HUMAN	Q8N1G4	Q8N1G4	LRRC47	Leucine-rich repeat-containing protein 47	181363
ANM1_HUMAN	Q99873	Q99873	PRMT1	Protein arginine N-methyltransferase 1	181062
RS19_HUMAN	P39019	P39019	RPS19	Small ribosomal subunit protein eS19	180995
ALDH2_HUMAN	P05091;O94788	P05091	ALDH2	Aldehyde dehydrogenase, mitochondrial	180731
XPO2_HUMAN	P55060	P55060	CSE1L	Exportin-2	180477
AT1B1_HUMAN	P05026	P05026	ATP1B1	Sodium/potassium-transporting ATPase subunit beta-1	180335
PDCD4_HUMAN	Q53EL6	Q53EL6	PDCD4	Programmed cell death protein 4	179284
RS20_HUMAN	P60866	P60866	RPS20	Small ribosomal subunit protein uS10	178780
ODO2_HUMAN	P36957	P36957	DLST	Dihydrolipoyllysine-residue succinyltransferase component of 2-oxoglutarate dehydrogenase complex, mitochondrial	178779
TGM2_HUMAN	P21980	P21980	TGM2	Protein-glutamine gamma-glutamyltransferase 2	178144
ANXA4_HUMAN	P09525	P09525	ANXA4	Annexin A4	177441
HNRH3_HUMAN	P31942	P31942	HNRNPH3	Heterogeneous nuclear ribonucleoprotein H3	177305
RUXGL_HUMAN;RUXG_HUMAN	A8MWD9;P62308	A8MWD9;P62308	SNRPG;SNRPGP15	Putative small nuclear ribonucleoprotein G-like protein 15	176777
EZRI_HUMAN	P15311	P15311	EZR	Ezrin	176615
GLU2B_HUMAN	P14314	P14314	PRKCSH	Glucosidase 2 subunit beta	176369
TCPZ_HUMAN	P40227	P40227	CCT6A	T-complex protein 1 subunit zeta	176277
ETFB_HUMAN	P38117	P38117	ETFB	Electron transfer flavoprotein subunit beta	176001
NUMA1_HUMAN	Q14980	Q14980	NUMA1	Nuclear mitotic apparatus protein 1	175648
STT3A_HUMAN	P46977	P46977	STT3A	Dolichyl-diphosphooligosaccharide--protein glycosyltransferase subunit STT3A	175630
RCC1_HUMAN	P18754	P18754	RCC1	Regulator of chromosome condensation	175265
RTN4_HUMAN	Q9NQC3	Q9NQC3	RTN4	Reticulon-4	174598
SPB6_HUMAN	P35237	P35237	SERPINB6	Serpin B6	173931
SPTB2_HUMAN	Q01082	Q01082	SPTBN1	Spectrin beta chain, non-erythrocytic 1	173094
CO3_HUMAN	P01024	P01024	C3	Complement C3	173076
SARNP_HUMAN	P82979	P82979	SARNP	SAP domain-containing ribonucleoprotein	172896
COX5A_HUMAN	P20674	P20674	COX5A	Cytochrome c oxidase subunit 5A, mitochondrial	172775
ANXA3_HUMAN	P12429	P12429	ANXA3	Annexin A3	172637
RS21_HUMAN	P63220	P63220	RPS21	Small ribosomal subunit protein eS21	172475
TRAP1_HUMAN	Q12931	Q12931	TRAP1	Heat shock protein 75 kDa, mitochondrial	172435
LEG1_HUMAN	P09382	P09382	LGALS1	Galectin-1	172200
RL36_HUMAN	Q9Y3U8	Q9Y3U8	RPL36	Large ribosomal subunit protein eL36	171746
NACAM_HUMAN	E9PAV3	E9PAV3	NACA	Nascent polypeptide-associated complex subunit alpha, muscle-specific form	171546
RL27_HUMAN	P61353	P61353	RPL27	Large ribosomal subunit protein eL27	171143
PDIA1_HUMAN	P07237	P07237	P4HB	Protein disulfide-isomerase	170763
PHS_HUMAN	P61457	P61457	PCBD1	Pterin-4-alpha-carbinolamine dehydratase	170305
CATB_HUMAN	P07858	P07858	CTSB	Cathepsin B	170268
CAYP1_HUMAN	Q13938	Q13938	CAPS	Calcyphosin	169466
COPB2_HUMAN	P35606	P35606	COPB2	Coatomer subunit beta'	168986
UBE2N_HUMAN	P61088	P61088	UBE2N	Ubiquitin-conjugating enzyme E2 N	167802
RU17_HUMAN	P08621	P08621	SNRNP70	U1 small nuclear ribonucleoprotein 70 kDa	167016
NOP58_HUMAN	Q9Y2X3	Q9Y2X3	NOP58	Nucleolar protein 58	166993
CALX_HUMAN	P27824	P27824	CANX	Calnexin	166544
RUVB2_HUMAN	Q9Y230	Q9Y230	RUVBL2	RuvB-like 2	166388
PARK7_HUMAN	Q99497	Q99497	PARK7	Parkinson disease protein 7	164939
ANXA6_HUMAN	P08133	P08133	ANXA6	Annexin A6	164008
VPS35_HUMAN	Q96QK1	Q96QK1	VPS35	Vacuolar protein sorting-associated protein 35	164001
PUR9_HUMAN	P31939	P31939	ATIC	Bifunctional purine biosynthesis protein ATIC	163519
RS7_HUMAN	P62081	P62081	RPS7	Small ribosomal subunit protein eS7	162539
PRAF3_HUMAN	O75915	O75915	ARL6IP5	PRA1 family protein 3	161999
TIA1_HUMAN	P31483	P31483	TIA1	Cytotoxic granule associated RNA binding protein TIA1	161663
SYDC_HUMAN	P14868	P14868	DARS1	Aspartate--tRNA ligase, cytoplasmic	160888
KHDR1_HUMAN	Q07666;O75525;Q5VWX1	Q07666	KHDRBS1	KH domain-containing, RNA-binding, signal transduction-associated protein 1	160581
JAM1_HUMAN	Q9Y624	Q9Y624	F11R	Junctional adhesion molecule A	159969
MGST2_HUMAN	Q99735	Q99735	MGST2	Microsomal glutathione S-transferase 2	159357
RAB10_HUMAN	P61026	P61026	RAB10	Ras-related protein Rab-10	159298
THIL_HUMAN	P24752	P24752	ACAT1	Acetyl-CoA acetyltransferase, mitochondrial	158891
RUXE_HUMAN	P62304	P62304	SNRPE	Small nuclear ribonucleoprotein E	158323
HCDH_HUMAN	Q16836	Q16836	HADH	Hydroxyacyl-coenzyme A dehydrogenase, mitochondrial	157617
PRDX4_HUMAN	Q13162	Q13162	PRDX4	Peroxiredoxin-4	157370
LA_HUMAN	P05455	P05455	SSB	Lupus La protein	156655
SAHH2_HUMAN	O43865	O43865	AHCYL1	S-adenosylhomocysteine hydrolase-like protein 1	156031
IGKC_HUMAN	P01834	P01834	IGKC	Immunoglobulin kappa constant	155306
RS30_HUMAN	P62861	P62861	FAU	Ubiquitin-like FUBI-ribosomal protein eS30 fusion protein	155234
RS10_HUMAN	P46783	P46783	RPS10	Small ribosomal subunit protein eS10	155108
APOA1_HUMAN	P02647	P02647	APOA1	Apolipoprotein A-I	153935
RL19_HUMAN	P84098	P84098	RPL19	Large ribosomal subunit protein eL19	153216
ARP3_HUMAN	P61158	P61158	ACTR3	Actin-related protein 3	153200
ARPC2_HUMAN	O15144	O15144	ARPC2	Actin-related protein 2/3 complex subunit 2	153189
RBM39_HUMAN	Q14498	Q14498	RBM39	RNA-binding protein 39	153166
UCRI_HUMAN	P0C7P4;P47985	P47985	UQCRFS1	Cytochrome b-c1 complex subunit Rieske, mitochondrial	152733
HLAB_HUMAN	P01889;P04439	P01889	HLA-B	HLA class I histocompatibility antigen, B alpha chain	152580
RALY_HUMAN	Q9UKM9	Q9UKM9	RALY	RNA-binding protein Raly	152547
CBR1_HUMAN	P16152	P16152	CBR1	Carbonyl reductase [NADPH] 1	152169
DECR_HUMAN	Q16698	Q16698	DECR1	2,4-dienoyl-CoA reductase [(3E)-enoyl-CoA-producing], mitochondrial	151639
SMD1_HUMAN	P62314	P62314	SNRPD1	Small nuclear ribonucleoprotein Sm D1	151575
SCPDL_HUMAN	Q8NBX0	Q8NBX0	SCCPDH	Saccharopine dehydrogenase-like oxidoreductase	151144
1433G_HUMAN	P61981	P61981	YWHAG	14-3-3 protein gamma	151140
TCPD_HUMAN	P50991	P50991	CCT4	T-complex protein 1 subunit delta	151076
FKBP3_HUMAN	Q00688	Q00688	FKBP3	Peptidyl-prolyl cis-trans isomerase FKBP3	150879
CD2B2_HUMAN	O95400	O95400	CD2BP2	CD2 antigen cytoplasmic tail-binding protein 2	150814
KCRB_HUMAN	P12277	P12277	CKB	Creatine kinase B-type	150748
XPP3_HUMAN	Q9NQH7	Q9NQH7	XPNPEP3	Xaa-Pro aminopeptidase 3	150226
SAMH1_HUMAN	Q9Y3Z3	Q9Y3Z3	SAMHD1	Deoxynucleoside triphosphate triphosphohydrolase SAMHD1	149947
AN32A_HUMAN	P39687;O43423	P39687	ANP32A	Acidic leucine-rich nuclear phosphoprotein 32 family member A	149852
CKAP4_HUMAN	Q07065	Q07065	CKAP4	Cytoskeleton-associated protein 4	149750
CALR_HUMAN	P27797	P27797	CALR	Calreticulin	149614
EIF3C_HUMAN	Q99613;B5ME19	Q99613	EIF3C	Eukaryotic translation initiation factor 3 subunit C	149228
RL26_HUMAN	P61254;Q9UNX3	P61254	RPL26	Large ribosomal subunit protein uL24	148553
AT5F1_HUMAN	P24539	P24539	ATP5PB	ATP synthase F(0) complex subunit B1, mitochondrial	148281
SYFB_HUMAN	Q9NSD9	Q9NSD9	FARSB	Phenylalanine--tRNA ligase beta subunit	148183
CO6A1_HUMAN	P12109	P12109	COL6A1	Collagen alpha-1(VI) chain	148071
CNPY2_HUMAN	Q9Y2B0	Q9Y2B0	CNPY2	Protein canopy homolog 2	147959
HNRPL_HUMAN	P14866	P14866	HNRNPL	Heterogeneous nuclear ribonucleoprotein L	147709
RABP2_HUMAN	P29373	P29373	CRABP2	Cellular retinoic acid-binding protein 2	147414
RUVB1_HUMAN	Q9Y265	Q9Y265	RUVBL1	RuvB-like 1	146779
RS3A_HUMAN	P61247	P61247	RPS3A	Small ribosomal subunit protein eS1	146712
EIF3A_HUMAN	Q14152	Q14152	EIF3A	Eukaryotic translation initiation factor 3 subunit A	146434
RL3_HUMAN	P39023	P39023	RPL3	Large ribosomal subunit protein uL3	146329
SF3B2_HUMAN	Q13435	Q13435	SF3B2	Splicing factor 3B subunit 2	145931
MLEC_HUMAN	Q14165	Q14165	MLEC	Malectin	145819
SYRC_HUMAN	P54136	P54136	RARS1	Arginine--tRNA ligase, cytoplasmic	145745
PYGB_HUMAN	P06737;P11217;P11216	P11216	PYGB	Glycogen phosphorylase, brain form	145035
HAP28_HUMAN	Q13442	Q13442	PDAP1	28 kDa heat- and acid-stable phosphoprotein	144980
TFAM_HUMAN	Q00059	Q00059	TFAM	Transcription factor A, mitochondrial	144577
COX6C_HUMAN	P09669	P09669	COX6C	Cytochrome c oxidase subunit 6C	144544
PSPC1_HUMAN	Q8WXF1	Q8WXF1	PSPC1	Paraspeckle component 1	144359
U5S1_HUMAN	Q15029	Q15029	EFTUD2	116 kDa U5 small nuclear ribonucleoprotein component	144203
RL34_HUMAN	P49207	P49207	RPL34	Large ribosomal subunit protein eL34	144063
RL24_HUMAN	P83731	P83731	RPL24	Large ribosomal subunit protein eL24	143903
BASI_HUMAN	P35613	P35613	BSG	Basigin	143479
S2513_HUMAN	Q9UJS0	Q9UJS0	SLC25A13	Electrogenic aspartate/glutamate antiporter SLC25A13, mitochondrial	143406
COR1B_HUMAN	Q9BR76	Q9BR76	CORO1B	Coronin-1B	143312
SF3B3_HUMAN	Q15393	Q15393	SF3B3	Splicing factor 3B subunit 3	143084
S10A1_HUMAN	P23297	P23297	S100A1	Protein S100-A1	142816
U2AF1_HUMAN	Q01081	Q01081	U2AF1	Splicing factor U2AF 35 kDa subunit	142728
ACADV_HUMAN	P49748	P49748	ACADVL	Very long-chain specific acyl-CoA dehydrogenase, mitochondrial	142437
SSRD_HUMAN	P51571	P51571	SSR4	Translocon-associated protein subunit delta	142213
ATP5I_HUMAN	P56385	P56385	ATP5ME	ATP synthase subunit e, mitochondrial	142211
AK1A1_HUMAN	P14550	P14550	AKR1A1	Aldo-keto reductase family 1 member A1	142155
RS5_HUMAN	P46782	P46782	RPS5	Small ribosomal subunit protein uS7	142131
NUP93_HUMAN	Q8N1F7	Q8N1F7	NUP93	Nuclear pore complex protein Nup93	141836
CPNS1_HUMAN	Q96L46;P04632	P04632	CAPNS1	Calpain small subunit 1	141494
U2AF2_HUMAN	P26368	P26368	U2AF2	Splicing factor U2AF 65 kDa subunit	140940
ZYX_HUMAN	Q15942	Q15942	ZYX	Zyxin	140655
6PGD_HUMAN	P52209	P52209	PGD	6-phosphogluconate dehydrogenase, decarboxylating	140457
FABP5_HUMAN	Q01469	Q01469	FABP5	Fatty acid-binding protein 5	139880
MYH14_HUMAN	Q7Z406	Q7Z406	MYH14	Myosin-14	139853
RBBP4_HUMAN	Q09028	Q09028	RBBP4	Histone-binding protein RBBP4	139729
GTF2I_HUMAN	P78347	P78347	GTF2I	General transcription factor II-I	139600
CPNE3_HUMAN	O75131	O75131	CPNE3	Copine-3	139460
CPNE1_HUMAN	Q99829	Q99829	CPNE1	Copine-1	139430
CTNA1_HUMAN	P35221;P26232	P35221	CTNNA1	Catenin alpha-1	138835
HNRDL_HUMAN	O14979	O14979	HNRNPDL	Heterogeneous nuclear ribonucleoprotein D-like	138827
PSB6_HUMAN	P28072	P28072	PSMB6	Proteasome subunit beta type-6	138014
CTNB1_HUMAN	P35222	P35222	CTNNB1	Catenin beta-1	137600
EPIPL_HUMAN	P58107	P58107	EPPK1	Epiplakin	136443
CAPZB_HUMAN	P47756	P47756	CAPZB	F-actin-capping protein subunit beta	136291
CATA_HUMAN	P04040	P04040	CAT	Catalase	135225
MVP_HUMAN	Q14764	Q14764	MVP	Major vault protein	135029
DLDH_HUMAN	P09622	P09622	DLD	Dihydrolipoyl dehydrogenase, mitochondrial	134624
DSG2_HUMAN	Q14126	Q14126	DSG2	Desmoglein-2	134421
LMAN1_HUMAN	P49257	P49257	LMAN1	Protein ERGIC-53	134395
NDKB_HUMAN	O60361;P22392	P22392	NME2	Nucleoside diphosphate kinase B	134347
EMD_HUMAN	P50402	P50402	EMD	Emerin	134075
ZZEF1_HUMAN	O43149	O43149	ZZEF1	Zinc finger ZZ-type and EF-hand domain-containing protein 1	133108
TBB3_HUMAN	Q13509	Q13509	TUBB3	Tubulin beta-3 chain	133092
SSDH_HUMAN	P51649	P51649	ALDH5A1	Succinate-semialdehyde dehydrogenase, mitochondrial	133070
RSMB_HUMAN	P14678	P14678	SNRPB	Small nuclear ribonucleoprotein-associated proteins B and B'	132995
AL9A1_HUMAN	P49189	P49189	ALDH9A1	4-trimethylaminobutyraldehyde dehydrogenase	132781
CO6A2_HUMAN	P12110	P12110	COL6A2	Collagen alpha-2(VI) chain	131827
GBB2_HUMAN	P16520;P62873;P62879	P62879	GNB2	Guanine nucleotide-binding protein G(I)/G(S)/G(T) subunit beta-2	131487
DHSO_HUMAN	Q00796	Q00796	SORD	Sorbitol dehydrogenase	131453
UCHL1_HUMAN	P09936	P09936	UCHL1	Ubiquitin carboxyl-terminal hydrolase isozyme L1	131425
RL18A_HUMAN	Q02543	Q02543	RPL18A	Large ribosomal subunit protein eL20	131163
GSTK1_HUMAN	Q9Y2Q3	Q9Y2Q3	GSTK1	Glutathione S-transferase kappa 1	130885
RCC2_HUMAN	Q9P258	Q9P258	RCC2	Protein RCC2	130403
SSRP1_HUMAN	Q08945	Q08945	SSRP1	FACT complex subunit SSRP1	130217
A1AG1_HUMAN	P02763	P02763	ORM1	Alpha-1-acid glycoprotein 1	130152
DDX1_HUMAN	Q92499	Q92499	DDX1	ATP-dependent RNA helicase DDX1	130017
RL30_HUMAN	P62888	P62888	RPL30	Large ribosomal subunit protein eL30	129325
PFKAL_HUMAN	P08237;P17858	P17858	PFKL	ATP-dependent 6-phosphofructokinase, liver type	129228
NH2L1_HUMAN	P55769	P55769	SNU13	NHP2-like protein 1	128845
PGM1_HUMAN	P36871	P36871	PGM1	Phosphoglucomutase-1	128534
GLYM_HUMAN	P34897	P34897	SHMT2	Serine hydroxymethyltransferase, mitochondrial	128297
RS11_HUMAN	P62280	P62280	RPS11	Small ribosomal subunit protein uS17	128126
TBB6_HUMAN	Q9BUF5;Q13509	Q9BUF5	TUBB6	Tubulin beta-6 chain	127482
DPYL3_HUMAN	Q14195	Q14195	DPYSL3	Dihydropyrimidinase-related protein 3	127036
RAD50_HUMAN	Q92878	Q92878	RAD50	DNA repair protein RAD50	125894
MMSA_HUMAN	Q02252	Q02252	ALDH6A1	Methylmalonate-semialdehyde dehydrogenase [acylating], mitochondrial	125534
VDAC1_HUMAN	P21796	P21796	VDAC1	Voltage-dependent anion-selective channel protein 1	125267
TR150_HUMAN	Q9Y2W1	Q9Y2W1	THRAP3	Thyroid hormone receptor-associated protein 3	125197
DEST_HUMAN	P60981	P60981	DSTN	Destrin	125145
LRC59_HUMAN	Q96AG4	Q96AG4	LRRC59	Leucine-rich repeat-containing protein 59	125001
CRIP2_HUMAN	P52943	P52943	CRIP2	Cysteine-rich protein 2	124869
PKP4_HUMAN	Q99569	Q99569	PKP4	Plakophilin-4	124810
PABP4_HUMAN	Q13310	Q13310	PABPC4	Polyadenylate-binding protein 4	124714
ECHA_HUMAN	P40939	P40939	HADHA	Trifunctional enzyme subunit alpha, mitochondrial	124233
APMAP_HUMAN	Q9HDC9	Q9HDC9	APMAP	Adipocyte plasma membrane-associated protein	124120
ECI1_HUMAN	P42126	P42126	ECI1	Enoyl-CoA delta isomerase 1, mitochondrial	124095
HDAC1_HUMAN	Q13547	Q13547	HDAC1	Histone deacetylase 1	123640
NACC1_HUMAN	Q96RE7	Q96RE7	NACC1	Nucleus accumbens-associated protein 1	123420
1433T_HUMAN	P27348	P27348	YWHAQ	14-3-3 protein theta	122870
MAP4_HUMAN	P27816	P27816	MAP4	Microtubule-associated protein 4	122739
PLSL_HUMAN	P13796	P13796	LCP1	Plastin-2	122674
RAB6A_HUMAN	Q9NRW1;P20340;Q9H0N0	P20340	RAB6A	Ras-related protein Rab-6A	122668
HYEP_HUMAN	P07099	P07099	EPHX1	Epoxide hydrolase 1	122618
ECH1_HUMAN	Q13011	Q13011	ECH1	Delta(3,5)-Delta(2,4)-dienoyl-CoA isomerase, mitochondrial	122566
NIPS2_HUMAN	O75323	O75323	NIPSNAP2	Protein NipSnap homolog 2	122346
KAP2_HUMAN	P13861	P13861	PRKAR2A	cAMP-dependent protein kinase type II-alpha regulatory subunit	122041
GPX1_HUMAN	P07203	P07203	GPX1	Glutathione peroxidase 1	121850
HYOU1_HUMAN	Q9Y4L1	Q9Y4L1	HYOU1	Hypoxia up-regulated protein 1	121582
NB5R3_HUMAN	P00387	P00387	CYB5R3	NADH-cytochrome b5 reductase 3	121353
FKBP4_HUMAN	Q02790	Q02790	FKBP4	Peptidyl-prolyl cis-trans isomerase FKBP4	121018
ANXA7_HUMAN	P20073	P20073	ANXA7	Annexin A7	120743
NHRF1_HUMAN	O14745	O14745	NHERF1	Na(+)/H(+) exchange regulatory cofactor NHE-RF1	120652
NDUAD_HUMAN	Q9P0J0	Q9P0J0	NDUFA13	NADH dehydrogenase [ubiquinone] 1 alpha subcomplex subunit 13	120479
AT5EL_HUMAN;ATP5E_HUMAN	Q5VTU8;P56381	P56381;Q5VTU8	ATP5F1E;ATP5F1EP2	ATP synthase subunit epsilon, mitochondrial	120420
GSTO1_HUMAN	P78417	P78417	GSTO1	Glutathione S-transferase omega-1	120363
RRBP1_HUMAN	Q9P2E9	Q9P2E9	RRBP1	Ribosome-binding protein 1	120198
ACADM_HUMAN	P11310	P11310	ACADM	Medium-chain specific acyl-CoA dehydrogenase, mitochondrial	119727
FKBP2_HUMAN	P26885	P26885	FKBP2	Peptidyl-prolyl cis-trans isomerase FKBP2	119454
TCPW_HUMAN	Q92526	Q92526	CCT6B	T-complex protein 1 subunit zeta-2	119393
CYC_HUMAN	P99999	P99999	CYCS	Cytochrome c	118594
ESTD_HUMAN	P10768	P10768	ESD	S-formylglutathione hydrolase	117931
AACT_HUMAN	P01011	P01011	SERPINA3	Alpha-1-antichymotrypsin	117852
SKT_HUMAN	Q5T5P2	Q5T5P2	KIAA1217	Sickle tail protein homolog	117118
INO1_HUMAN	Q9NPH2	Q9NPH2	ISYNA1	Inositol-3-phosphate synthase 1	117034
RL9_HUMAN	P32969	P32969	RPL9P9	Large ribosomal subunit protein uL6	116664
FIBB_HUMAN	P02675	P02675	FGB	Fibrinogen beta chain	116632
PSA5_HUMAN	P28066	P28066	PSMA5	Proteasome subunit alpha type-5	116465
CCAR2_HUMAN	Q8N163	Q8N163	CCAR2	Cell cycle and apoptosis regulator protein 2	116315
PABP2_HUMAN	A6NDY0;Q86U42	Q86U42	PABPN1	Polyadenylate-binding protein 2	116206
IF4G1_HUMAN	Q04637	Q04637	EIF4G1	Eukaryotic translation initiation factor 4 gamma 1	116166
ARC1A_HUMAN	Q92747	Q92747	ARPC1A	Actin-related protein 2/3 complex subunit 1A	115789
MIC60_HUMAN	Q16891	Q16891	IMMT	MICOS complex subunit MIC60	115590
DNPEP_HUMAN	Q9ULA0	Q9ULA0	DNPEP	Aspartyl aminopeptidase	115440
PP2AA_HUMAN	P67775;P62714	P67775	PPP2CA	Serine/threonine-protein phosphatase 2A catalytic subunit alpha isoform	115160
ATPD_HUMAN	P30049	P30049	ATP5F1D	ATP synthase subunit delta, mitochondrial	114803
CLCA_HUMAN	P09496	P09496	CLTA	Clathrin light chain A	114134
NIT2_HUMAN	Q9NQR4	Q9NQR4	NIT2	Omega-amidase NIT2	114048
TMED9_HUMAN	Q9BVK6	Q9BVK6	TMED9	Transmembrane emp24 domain-containing protein 9	113918
SYIC_HUMAN	P41252	P41252	IARS1	Isoleucine--tRNA ligase, cytoplasmic	113797
DCD_HUMAN	P81605	P81605	DCD	Dermcidin	113684
IF6_HUMAN	P56537	P56537	EIF6	Eukaryotic translation initiation factor 6	113651
FUMH_HUMAN	P07954	P07954	FH	Fumarate hydratase, mitochondrial	113298
SUMO1_HUMAN	G2XKQ0;P63165	P63165	SUMO1	Small ubiquitin-related modifier 1	113184
BAF_HUMAN	O75531	O75531	BANF1	Barrier-to-autointegration factor	112820
UBF1_HUMAN	P17480	P17480	UBTF	Nucleolar transcription factor 1	112800
RS27_HUMAN	P42677;Q71UM5	P42677	RPS27	Small ribosomal subunit protein eS27	112632
ARPC5_HUMAN	O15511	O15511	ARPC5	Actin-related protein 2/3 complex subunit 5	112381
DHX15_HUMAN	O43143	O43143	DHX15	ATP-dependent RNA helicase DHX15	112102
SYEP_HUMAN	P07814	P07814	EPRS1	Bifunctional glutamate/proline--tRNA ligase	111641
ATP5H_HUMAN	O75947	O75947	ATP5PD	ATP synthase subunit d, mitochondrial	111572
TFG_HUMAN	Q92734	Q92734	TFG	Protein TFG	111231
PML_HUMAN	P29590	P29590	PML	Protein PML	110741
PSB4_HUMAN	P28070	P28070	PSMB4	Proteasome subunit beta type-4	110647
DDX3X_HUMAN	O15523;O00571	O00571	DDX3X	ATP-dependent RNA helicase DDX3X	110476
GNAI3_HUMAN	P08754	P08754	GNAI3	Guanine nucleotide-binding protein G(i) subunit alpha-3	110286
SYVC_HUMAN	P26640	P26640	VARS1	Valine--tRNA ligase	110237
COX5B_HUMAN	P10606	P10606	COX5B	Cytochrome c oxidase subunit 5B, mitochondrial	110039
ILF2_HUMAN	Q12905	Q12905	ILF2	Interleukin enhancer-binding factor 2	109946
IF4B_HUMAN	P23588	P23588	EIF4B	Eukaryotic translation initiation factor 4B	109473
CLUS_HUMAN	P10909	P10909	CLU	Clusterin	109363
EIF3F_HUMAN	O00303	O00303	EIF3F	Eukaryotic translation initiation factor 3 subunit F	109268
PYR1_HUMAN	P27708	P27708	CAD	CAD protein	109141
H2AW_HUMAN	Q9P0M6	Q9P0M6	MACROH2A2	Core histone macro-H2A.2	108961
SRRM2_HUMAN	Q9UQ35	Q9UQ35	SRRM2	Serine/arginine repetitive matrix protein 2	108865
TBCA_HUMAN	O75347	O75347	TBCA	Tubulin-specific chaperone A	108812
HNRL2_HUMAN	Q1KMD3	Q1KMD3	HNRNPUL2	Heterogeneous nuclear ribonucleoprotein U-like protein 2	108301
QOR_HUMAN	Q08257	Q08257	CRYZ	Quinone oxidoreductase	108088
VP26A_HUMAN	O75436	O75436	VPS26A	Vacuolar protein sorting-associated protein 26A	107164
AFG32_HUMAN	Q9Y4W6	Q9Y4W6	AFG3L2	AFG3-like protein 2	107051
MK01_HUMAN	P28482	P28482	MAPK1	Mitogen-activated protein kinase 1	107031
DEK_HUMAN	P35659	P35659	DEK	Protein DEK	106844
LEMD2_HUMAN	Q8NC56	Q8NC56	LEMD2	LEM domain-containing protein 2	106692
HXK1_HUMAN	P19367	P19367	HK1	Hexokinase-1	106544
ESRP1_HUMAN	Q9H6T0;Q6NXG1	Q6NXG1	ESRP1	Epithelial splicing regulatory protein 1	106297
TLN1_HUMAN	Q9Y490	Q9Y490	TLN1	Talin-1	106120
TCPE_HUMAN	P48643	P48643	CCT5	T-complex protein 1 subunit epsilon	105819
THIM_HUMAN	P42765	P42765	ACAA2	3-ketoacyl-CoA thiolase, mitochondrial	105725
MYL9_HUMAN	P24844	P24844	MYL9	Myosin regulatory light polypeptide 9	105699
DDX6_HUMAN	P26196	P26196	DDX6	Probable ATP-dependent RNA helicase DDX6	105564
MAT2B_HUMAN	Q9NZL9	Q9NZL9	MAT2B	Methionine adenosyltransferase 2 subunit beta	105428
XPO1_HUMAN	O14980	O14980	XPO1	Exportin-1	105277
STAT1_HUMAN	P42224	P42224	STAT1	Signal transducer and activator of transcription 1-alpha/beta	104663
PGH1_HUMAN	P23219	P23219	PTGS1	Prostaglandin G/H synthase 1	104253
CALU_HUMAN	O43852	O43852	CALU	Calumenin	104081
FCL_HUMAN	Q13630	Q13630	GFUS	GDP-L-fucose synthase	103751
PEPL_HUMAN	O60437	O60437	PPL	Periplakin	103078
HEMO_HUMAN	P02790	P02790	HPX	Hemopexin	103029
AL1A1_HUMAN	P00352	P00352	ALDH1A1	Aldehyde dehydrogenase 1A1	102904
CTBP1_HUMAN	P56545;Q13363	Q13363	CTBP1	C-terminal-binding protein 1	102844
HNRPQ_HUMAN	O60506	O60506	SYNCRIP	Heterogeneous nuclear ribonucleoprotein Q	102701
SH3L1_HUMAN	O75368	O75368	SH3BGRL	Adapter SH3BGRL	102692
RAP1A_HUMAN	P62834;P61224	P62834	RAP1A	Ras-related protein Rap-1A	102263
LAMP1_HUMAN	P11279	P11279	LAMP1	Lysosome-associated membrane glycoprotein 1	102171
RTCB_HUMAN	Q9Y3I0	Q9Y3I0	RTCB	RNA-splicing ligase RtcB homolog	102111
GPDM_HUMAN	P43304	P43304	GPD2	Glycerol-3-phosphate dehydrogenase, mitochondrial	101968
C1TC_HUMAN	P11586	P11586	MTHFD1	C-1-tetrahydrofolate synthase, cytoplasmic	101826
RU2A_HUMAN	P09661	P09661	SNRPA1	U2 small nuclear ribonucleoprotein A'	101629
PSME2_HUMAN	Q9UL46	Q9UL46	PSME2	Proteasome activator complex subunit 2	101373
AL1B1_HUMAN	P30837	P30837	ALDH1B1	Aldehyde dehydrogenase X, mitochondrial	101225
PKP2_HUMAN	Q99959	Q99959	PKP2	Plakophilin-2	101223
TRA2B_HUMAN	P62995	P62995	TRA2B	Transformer-2 protein homolog beta	100822
CSRP1_HUMAN	P21291	P21291	CSRP1	Cysteine and glycine-rich protein 1	100819
CIRBP_HUMAN	Q14011	Q14011	CIRBP	Cold-inducible RNA-binding protein	100611
HSP74_HUMAN	P34932	P34932	HSPA4	Heat shock 70 kDa protein 4	100173
PKP3_HUMAN	Q9Y446	Q9Y446	PKP3	Plakophilin-3	99802.8
LYPA1_HUMAN	O75608	O75608	LYPLA1	Acyl-protein thioesterase 1	99587.9
FLNB_HUMAN	O75369	O75369	FLNB	Filamin-B	99549.7
LSM3_HUMAN	P62310	P62310	LSM3	U6 snRNA-associated Sm-like protein LSm3	99544.9
CYTB_HUMAN	P04080	P04080	CSTB	Cystatin-B	99532.5
EP15R_HUMAN	Q9UBC2	Q9UBC2	EPS15L1	Epidermal growth factor receptor substrate 15-like 1	99186.5
RBM14_HUMAN	Q96PK6	Q96PK6	RBM14	RNA-binding protein 14	98916.6
S10AA_HUMAN	P60903	P60903	S100A10	Protein S100-A10	98881.6
TPD54_HUMAN	O43399	O43399	TPD52L2	Tumor protein D54	98838.8
HARS1_HUMAN	P12081;P49590	P12081	HARS1	Histidine--tRNA ligase, cytoplasmic	98703
KCD12_HUMAN	Q96CX2	Q96CX2	KCTD12	BTB/POZ domain-containing protein KCTD12	98469.9
GUAA_HUMAN	P49915	P49915	GMPS	GMP synthase [glutamine-hydrolyzing]	98416.1
MOGS_HUMAN	Q13724	Q13724	MOGS	Mannosyl-oligosaccharide glucosidase	97958.1
HYAS1_HUMAN	Q92839	Q92839	HAS1	Hyaluronan synthase 1	97934.4
GDIA_HUMAN	P31150	P31150	GDI1	Rab GDP dissociation inhibitor alpha	97908
BIEA_HUMAN	P53004	P53004	BLVRA	Biliverdin reductase A	97560.3
ANM5_HUMAN	O14744	O14744	PRMT5	Protein arginine N-methyltransferase 5	97316.4
GTR1_HUMAN	P11166	P11166	SLC2A1	Solute carrier family 2, facilitated glucose transporter member 1	97135.9
SAP_HUMAN	P07602	P07602	PSAP	Prosaposin	97127.9
SNX2_HUMAN	Q13596;O60749	O60749	SNX2	Sorting nexin-2	97004.2
PRAF2_HUMAN	O60831	O60831	PRAF2	PRA1 family protein 2	96801.5
IF5A1_HUMAN	Q9GZV4;P63241;Q6IS14	P63241	EIF5A	Eukaryotic translation initiation factor 5A-1	96750.7
NDUS1_HUMAN	P28331	P28331	NDUFS1	NADH-ubiquinone oxidoreductase 75 kDa subunit, mitochondrial	96612.7
RAB5C_HUMAN	P20339;P61020;P51148	P51148	RAB5C	Ras-related protein Rab-5C	96417.2
KV320_HUMAN	P01619	P01619	IGKV3-20	Immunoglobulin kappa variable 3-20	96180.1
ACTN1_HUMAN	P12814;P35609	P12814	ACTN1	Alpha-actinin-1	96157.9
ROAA_HUMAN	Q99729	Q99729	HNRNPAB	Heterogeneous nuclear ribonucleoprotein A/B	95967.4
PSMD6_HUMAN	Q15008	Q15008	PSMD6	26S proteasome non-ATPase regulatory subunit 6	95933.3
ATD3A_HUMAN	Q9NVI7;Q5T9A4	Q9NVI7	ATAD3A	ATPase family AAA domain-containing protein 3A	95788.4
HINT2_HUMAN	Q9BX68	Q9BX68	HINT2	Adenosine 5'-monophosphoramidase HINT2	95759.5
1433S_HUMAN	P31947	P31947	SFN	14-3-3 protein sigma	95188.2
MTCH2_HUMAN	Q9Y6C9	Q9Y6C9	MTCH2	Mitochondrial carrier homolog 2	95127.3
SART3_HUMAN	Q15020	Q15020	SART3	Squamous cell carcinoma antigen recognized by T-cells 3	94990.7
OXSR1_HUMAN	O95747	O95747	OXSR1	Serine/threonine-protein kinase OSR1	94839.9
CLD3_HUMAN	P56747;O14493;O15551;O95484	O15551	CLDN3	Claudin-3	94700.3
UBP14_HUMAN	P54578	P54578	USP14	Ubiquitin carboxyl-terminal hydrolase 14	94392.5
RL29_HUMAN	P47914	P47914	RPL29	Large ribosomal subunit protein eL29	93974.3
SUCB2_HUMAN	Q96I99	Q96I99	SUCLG2	Succinate--CoA ligase [GDP-forming] subunit beta, mitochondrial	93845.1
SYPL1_HUMAN	Q16563	Q16563	SYPL1	Synaptophysin-like protein 1	93454
SSRA_HUMAN	P43307	P43307	SSR1	Translocon-associated protein subunit alpha	93159.3
HMGA1_HUMAN	P17096	P17096	HMGA1	High mobility group protein HMG-I/HMG-Y	92860.1
HLAG_HUMAN	P17693	P17693	HLA-G	HLA class I histocompatibility antigen, alpha chain G	92778.7
HNRPF_HUMAN	P52597	P52597	HNRNPF	Heterogeneous nuclear ribonucleoprotein F	92713.4
ODPB_HUMAN	P11177	P11177	PDHB	Pyruvate dehydrogenase E1 component subunit beta, mitochondrial	92698.4
PUR2_HUMAN	P22102	P22102	GART	Trifunctional purine biosynthetic protein adenosine-3	92665.6
FAK1_HUMAN	Q05397	Q05397	PTK2	Focal adhesion kinase 1	92619.5
ACS2L_HUMAN	Q9NUB1	Q9NUB1	ACSS1	Acetyl-coenzyme A synthetase 2-like, mitochondrial	92492.7
CADH1_HUMAN	P12830	P12830	CDH1	Cadherin-1	92078.9
2AAA_HUMAN	P30153	P30153	PPP2R1A	Serine/threonine-protein phosphatase 2A 65 kDa regulatory subunit A alpha isoform	91884.1
EMAL6_HUMAN	Q6ZMW3	Q6ZMW3	EML6	Echinoderm microtubule-associated protein-like 6	91704.2
SC11A_HUMAN	P67812	P67812	SEC11A	Signal peptidase complex catalytic subunit SEC11A	91582.7
CAZA2_HUMAN	P47755	P47755	CAPZA2	F-actin-capping protein subunit alpha-2	91374.9
RBM3_HUMAN	P98179	P98179	RBM3	RNA-binding protein 3	91139.2
ERP44_HUMAN	Q9BS26	Q9BS26	ERP44	Endoplasmic reticulum resident protein 44	91071.6
SRS10_HUMAN	O75494	O75494	SRSF10	Serine/arginine-rich splicing factor 10	91069.2
THIO_HUMAN	P10599	P10599	TXN	Thioredoxin	90840
DHB4_HUMAN	P51659	P51659	HSD17B4	Peroxisomal multifunctional enzyme type 2	90651.2
PSA6_HUMAN	P60900	P60900	PSMA6	Proteasome subunit alpha type-6	90562.1
SODM_HUMAN	P04179	P04179	SOD2	Superoxide dismutase [Mn], mitochondrial	90542.1
SDHB_HUMAN	P21912	P21912	SDHB	Succinate dehydrogenase [ubiquinone] iron-sulfur subunit, mitochondrial	90231.8
CYFP1_HUMAN	Q7L576	Q7L576	CYFIP1	Cytoplasmic FMR1-interacting protein 1	90008.4
IPYR2_HUMAN	Q9H2U2	Q9H2U2	PPA2	Inorganic pyrophosphatase 2, mitochondrial	89889.9
LSM8_HUMAN	O95777	O95777	LSM8	U6 snRNA-associated Sm-like protein LSm8	89734.2
1433F_HUMAN	Q04917	Q04917	YWHAH	14-3-3 protein eta	89694.3
TEBP_HUMAN	Q15185	Q15185	PTGES3	Prostaglandin E synthase 3	89549.5
FABPH_HUMAN	P05413	P05413	FABP3	Fatty acid-binding protein, heart	89515.4
VIGLN_HUMAN	Q00341	Q00341	HDLBP	Vigilin	89336.2
RD23B_HUMAN	P54725;P54727	P54727	RAD23B	UV excision repair protein RAD23 homolog B	89137.5
ZO1_HUMAN	Q07157	Q07157	TJP1	Tight junction protein ZO-1	89137
PROF2_HUMAN	P35080	P35080	PFN2	Profilin-2	88948.6
SCRB2_HUMAN	Q14108	Q14108	SCARB2	Lysosome membrane protein 2	88908.3
RCN1_HUMAN	Q15293	Q15293	RCN1	Reticulocalbin-1	88867.5
UBA3_HUMAN	Q8TBC4	Q8TBC4	UBA3	NEDD8-activating enzyme E1 catalytic subunit	88795.5
COPD_HUMAN	P48444	P48444	ARCN1	Coatomer subunit delta	88704.8
TRIPC_HUMAN	Q14669	Q14669	TRIP12	E3 ubiquitin-protein ligase TRIP12	88560.4
PRS6A_HUMAN	P17980	P17980	PSMC3	26S proteasome regulatory subunit 6A	88541.6
ATP5L_HUMAN	O75964	O75964	ATP5MG	ATP synthase subunit g, mitochondrial	87857.2
DDX21_HUMAN	Q9NR30	Q9NR30	DDX21	Nucleolar RNA helicase 2	87844.2
GBG12_HUMAN	Q9UBI6	Q9UBI6	GNG12	Guanine nucleotide-binding protein G(I)/G(S)/G(O) subunit gamma-12	87769
VAT1_HUMAN	Q99536	Q99536	VAT1	Synaptic vesicle membrane protein VAT-1 homolog	87752.9
C1QBP_HUMAN	Q07021	Q07021	C1QBP	Complement component 1 Q subcomponent-binding protein, mitochondrial	87751.6
MYEF2_HUMAN	Q9P2K5	Q9P2K5	MYEF2	Myelin expression factor 2	87700.5
UBP5_HUMAN	P45974	P45974	USP5	Ubiquitin carboxyl-terminal hydrolase 5	87678.3
ROA0_HUMAN	Q13151	Q13151	HNRNPA0	Heterogeneous nuclear ribonucleoprotein A0	87673.5
RENT1_HUMAN	Q92900	Q92900	UPF1	Regulator of nonsense transcripts 1	87634.3
DYHC2_HUMAN	Q8NCM8	Q8NCM8	DYNC2H1	Cytoplasmic dynein 2 heavy chain 1	87626.2
PNCB_HUMAN	Q6XQN6	Q6XQN6	NAPRT	Nicotinate phosphoribosyltransferase	87295
SYNC_HUMAN	O43776	O43776	NARS1	Asparagine--tRNA ligase, cytoplasmic	87257.3
THOC4_HUMAN	Q86V81	Q86V81	ALYREF	THO complex subunit 4	87204.5
ERP29_HUMAN	P30040	P30040	ERP29	Endoplasmic reticulum resident protein 29	87196.8
SEPT2_HUMAN	Q15019	Q15019	SEPTIN2	Septin-2	87061.5
SH3L3_HUMAN	Q9H299	Q9H299	SH3BGRL3	SH3 domain-binding glutamic acid-rich-like protein 3	87023.4
ODO1_HUMAN	Q02218	Q02218	OGDH	2-oxoglutarate dehydrogenase complex component E1	86953.4
TPM1_HUMAN	P09493	P09493	TPM1	Tropomyosin alpha-1 chain	86787.6
METK2_HUMAN	P31153	P31153	MAT2A	S-adenosylmethionine synthase isoform type-2	86689.9
CCDC6_HUMAN	Q16204	Q16204	CCDC6	Coiled-coil domain-containing protein 6	86607
NOP2_HUMAN	P46087	P46087	NOP2	Probable 28S rRNA (cytosine(4447)-C(5))-methyltransferase	86561.4
COX41_HUMAN	P13073	P13073	COX4I1	Cytochrome c oxidase subunit 4 isoform 1, mitochondrial	86388.5
CDC37_HUMAN	Q16543	Q16543	CDC37	Hsp90 co-chaperone Cdc37	86226.1
AMPB_HUMAN	Q9H4A4	Q9H4A4	RNPEP	Aminopeptidase B	86163.1
COIA1_HUMAN	P39060	P39060	COL18A1	Collagen alpha-1(XVIII) chain	86116.9
PSB1_HUMAN	P20618	P20618	PSMB1	Proteasome subunit beta type-1	86109.9
PRA18_HUMAN	Q5VWM3;Q5SWL8	Q5VWM3	PRAMEF18	PRAME family member 18	86077.8
AT2A2_HUMAN	P16615	P16615	ATP2A2	Sarcoplasmic/endoplasmic reticulum calcium ATPase 2	86011.6
RAB8A_HUMAN	Q92930;P61006	P61006	RAB8A	Ras-related protein Rab-8A	85920.9
NP1L4_HUMAN	Q99733	Q99733	NAP1L4	Nucleosome assembly protein 1-like 4	85625.5
ALDR_HUMAN	P15121	P15121	AKR1B1	Aldo-keto reductase family 1 member B1	85515.9
PTK7_HUMAN	Q13308	Q13308	PTK7	Inactive tyrosine-protein kinase 7	85471.4
EX3L4_HUMAN	Q17RC7	Q17RC7	EXOC3L4	Exocyst complex component 3-like protein 4	85447.5
LAMC1_HUMAN	P11047	P11047	LAMC1	Laminin subunit gamma-1	85365.8
EFGM_HUMAN	Q96RP9	Q96RP9	GFM1	Elongation factor G, mitochondrial	85304.5
MYH11_HUMAN	P35749	P35749	MYH11	Myosin-11	84973.5
DRB1_HUMAN	P01911	P01911	HLA-DRB1	HLA class II histocompatibility antigen, DRB1 beta chain	84801.7
SRC8_HUMAN	Q14247	Q14247	CTTN	Src substrate cortactin	84727.9
UBC9_HUMAN	P63279	P63279	UBE2I	SUMO-conjugating enzyme UBC9	84640.3
DDX5_HUMAN	P17844	P17844	DDX5	Probable ATP-dependent RNA helicase DDX5	84308.6
ETHE1_HUMAN	O95571	O95571	ETHE1	Persulfide dioxygenase ETHE1, mitochondrial	84234.5
NUCB1_HUMAN	Q02818	Q02818	NUCB1	Nucleobindin-1	84233.3
NIBA2_HUMAN	Q96TA1	Q96TA1	NIBAN2	Protein Niban 2	83920.3
SYQ_HUMAN	P47897	P47897	QARS1	Glutamine--tRNA ligase	83881.2
STT3B_HUMAN	Q8TCJ2	Q8TCJ2	STT3B	Dolichyl-diphosphooligosaccharide--protein glycosyltransferase subunit STT3B	83566.5
LANC1_HUMAN	O43813	O43813	LANCL1	Glutathione S-transferase LANCL1	83504.1
HG2A_HUMAN	P04233	P04233	CD74	HLA class II histocompatibility antigen gamma chain	83408.3
SAM50_HUMAN	Q9Y512	Q9Y512	SAMM50	Sorting and assembly machinery component 50 homolog	83253.6
IC1_HUMAN	P05155	P05155	SERPING1	Plasma protease C1 inhibitor	83206.6
STML2_HUMAN	Q9UJZ1	Q9UJZ1	STOML2	Stomatin-like protein 2, mitochondrial	82976.8
SAFB1_HUMAN	Q15424	Q15424	SAFB	Scaffold attachment factor B1	82959
IMDH2_HUMAN	P12268	P12268	IMPDH2	Inosine-5'-monophosphate dehydrogenase 2	82887.8
NASP_HUMAN	P49321	P49321	NASP	Nuclear autoantigenic sperm protein	82728.6
SRP14_HUMAN	P37108	P37108	SRP14	Signal recognition particle 14 kDa protein	82546.3
AP2S1_HUMAN	P53680	P53680	AP2S1	AP-2 complex subunit sigma	82503.8
SDHA_HUMAN	P31040	P31040	SDHA	Succinate dehydrogenase [ubiquinone] flavoprotein subunit, mitochondrial	82457.6
SERB1_HUMAN	Q8NC51	Q8NC51	SERBP1	SERPINE1 mRNA-binding protein 1	82413.8
SC24C_HUMAN	P53992	P53992	SEC24C	Protein transport protein Sec24C	82304.7
LKHA4_HUMAN	P09960	P09960	LTA4H	Leukotriene A-4 hydrolase	82225.4
SF3B1_HUMAN	O75533	O75533	SF3B1	Splicing factor 3B subunit 1	82127.3
UBQL1_HUMAN	Q9UMX0	Q9UMX0	UBQLN1	Ubiquilin-1	82049.4
RBM8A_HUMAN	Q9Y5S9	Q9Y5S9	RBM8A	RNA-binding protein 8A	81919.8
BUB3_HUMAN	O43684	O43684	BUB3	Mitotic checkpoint protein BUB3	81894.8
GAL3A_HUMAN;GAL3B_HUMAN	P0DPI2;A0A0B4J2D5	A0A0B4J2D5;P0DPI2	GATD3;GATD3B	Putative glutamine amidotransferase-like class 1 domain-containing protein 3B, mitochondrial	81751.1
SC61B_HUMAN	P60468	P60468	SEC61B	Protein transport protein Sec61 subunit beta	81691
MCM5_HUMAN	P33992	P33992	MCM5	DNA replication licensing factor MCM5	81472.4
MIC19_HUMAN	Q9NX63	Q9NX63	CHCHD3	MICOS complex subunit MIC19	81245.8
UBC12_HUMAN	P61081	P61081	UBE2M	NEDD8-conjugating enzyme Ubc12	81194.8
CDK1_HUMAN	P06493	P06493	CDK1	Cyclin-dependent kinase 1	81183.9
SF01_HUMAN	Q15637	Q15637	SF1	Splicing factor 1	81019.4
ABHDB_HUMAN	Q8NFV4	Q8NFV4	ABHD11	Protein ABHD11	80914.8
CD9_HUMAN	P21926	P21926	CD9	CD9 antigen	80705.5
OLA1_HUMAN	Q9NTK5	Q9NTK5	OLA1	Obg-like ATPase 1	80704.5
RL5_HUMAN	P46777	P46777	RPL5	Large ribosomal subunit protein uL18	80644.7
IGLL5_HUMAN	P0CF74;P0DOY2;B9A064;A0M8Q6;P0CG04	B9A064	IGLL5	Immunoglobulin lambda-like polypeptide 5	80446.8
ADHX_HUMAN	P11766	P11766	ADH5	Alcohol dehydrogenase class-3	80290.3
PFD2_HUMAN	Q9UHV9	Q9UHV9	PFDN2	Prefoldin subunit 2	80271
SMC1A_HUMAN	Q14683	Q14683	SMC1A	Structural maintenance of chromosomes protein 1A	80250.2
BAG6_HUMAN	P46379	P46379	BAG6	Large proline-rich protein BAG6	80209.2
SMCA5_HUMAN	O60264;P28370	O60264	SMARCA5	SWI/SNF-related matrix-associated actin-dependent regulator of chromatin subfamily A member 5	80007.7
TSTD1_HUMAN	Q8NFU3	Q8NFU3	TSTD1	Thiosulfate:glutathione sulfurtransferase	79894.8
CALD1_HUMAN	Q05682	Q05682	CALD1	Caldesmon	79881.9
SYK_HUMAN	Q15046	Q15046	KARS1	Lysine--tRNA ligase	79814.3
MOB1A_HUMAN;MOB1B_HUMAN	Q7L9L4;Q9H8S9	Q7L9L4;Q9H8S9	MOB1A;MOB1B	MOB kinase activator 1B	79739.9
EIF3E_HUMAN	P60228	P60228	EIF3E	Eukaryotic translation initiation factor 3 subunit E	79686.8
COPB_HUMAN	P53618	P53618	COPB1	Coatomer subunit beta	79634.9
LSM6_HUMAN	P62312	P62312	LSM6	U6 snRNA-associated Sm-like protein LSm6	79582.3
DYN2_HUMAN	Q9UQ16;P50570	P50570	DNM2	Dynamin-2	79320.9
SPEE_HUMAN	P19623	P19623	SRM	Spermidine synthase	79252.8
ANT3_HUMAN	P01008	P01008	SERPINC1	Antithrombin-III	78963
U520_HUMAN	O75643	O75643	SNRNP200	U5 small nuclear ribonucleoprotein 200 kDa helicase	78901.2
NADC_HUMAN	Q15274	Q15274	QPRT	Nicotinate-nucleotide pyrophosphorylase [carboxylating]	78880.1
PGRC2_HUMAN	O15173	O15173	PGRMC2	Membrane-associated progesterone receptor component 2	78726.7
DPYL2_HUMAN	Q16555	Q16555	DPYSL2	Dihydropyrimidinase-related protein 2	78683.2
DKC1_HUMAN	O60832	O60832	DKC1	H/ACA ribonucleoprotein complex subunit DKC1	78518.8
DDB1_HUMAN	Q16531	Q16531	DDB1	DNA damage-binding protein 1	78487.5
GAR1_HUMAN	Q9NY12	Q9NY12	GAR1	H/ACA ribonucleoprotein complex subunit 1	78430.6
ERF1_HUMAN	P62495	P62495	ETF1	Eukaryotic peptide chain release factor subunit 1	78328
JUPI2_HUMAN	Q9H910	Q9H910	JPT2	Jupiter microtubule associated homolog 2	78185.5
TALDO_HUMAN	P37837	P37837	TALDO1	Transaldolase	77912.9
NEDD8_HUMAN	Q15843	Q15843	NEDD8	NEDD8	77671.4
TWF1_HUMAN	Q12792	Q12792	TWF1	Twinfilin-1	77524.3
DCTN2_HUMAN	Q13561	Q13561	DCTN2	Dynactin subunit 2	77463.4
RAB2A_HUMAN	P61019;Q8WUD1	P61019	RAB2A	Ras-related protein Rab-2A	77359.6
RL1D1_HUMAN	O76021	O76021	RSL1D1	Ribosomal L1 domain-containing protein 1	77311.5
GRHPR_HUMAN	Q9UBQ7	Q9UBQ7	GRHPR	Glyoxylate reductase/hydroxypyruvate reductase	77284.3
SYIM_HUMAN	Q9NSE4	Q9NSE4	IARS2	Isoleucine--tRNA ligase, mitochondrial	77034.2
TPPC3_HUMAN	O43617	O43617	TRAPPC3	Trafficking protein particle complex subunit 3	76940.3
NDUV2_HUMAN	P19404	P19404	NDUFV2	NADH dehydrogenase [ubiquinone] flavoprotein 2, mitochondrial	76773.1
FSCN1_HUMAN	Q16658	Q16658	FSCN1	Fascin	76687.6
PPT1_HUMAN	P50897	P50897	PPT1	Palmitoyl-protein thioesterase 1	76620.9
WSCD1_HUMAN	Q658N2	Q658N2	WSCD1	Sialate:O-sulfotransferase 1	76593.2
DDX23_HUMAN	Q9BUQ8	Q9BUQ8	DDX23	Probable ATP-dependent RNA helicase DDX23	76366.1
SCRIB_HUMAN	Q14160	Q14160	SCRIB	Protein scribble homolog	76187.4
NUCKS_HUMAN	Q9H1E3	Q9H1E3	NUCKS1	Nuclear ubiquitous casein and cyclin-dependent kinase substrate 1	76142.5
SRSF9_HUMAN	Q13242	Q13242	SRSF9	Serine/arginine-rich splicing factor 9	76113.3
CDN2A_HUMAN	P42772;P42771	P42771	CDKN2A	Cyclin-dependent kinase inhibitor 2A	76084.8
SYMC_HUMAN	P56192	P56192	MARS1	Methionine--tRNA ligase, cytoplasmic	75875.6
AN32B_HUMAN	Q92688	Q92688	ANP32B	Acidic leucine-rich nuclear phosphoprotein 32 family member B	75703.9
FIBG_HUMAN	P02679	P02679	FGG	Fibrinogen gamma chain	75599.6
TOP2B_HUMAN	Q02880	Q02880	TOP2B	DNA topoisomerase 2-beta	75438.2
AFAD_HUMAN	P55196	P55196	AFDN	Afadin	75437.2
RL23A_HUMAN	P62750	P62750	RPL23A	Large ribosomal subunit protein uL23	75275.3
TRA2A_HUMAN	Q13595	Q13595	TRA2A	Transformer-2 protein homolog alpha	75106.2
LAMB2_HUMAN	P55268	P55268	LAMB2	Laminin subunit beta-2	75004.4
PDXK_HUMAN	O00764	O00764	PDXK	Pyridoxal kinase	75003.6
FBN1_HUMAN	P35555	P35555	FBN1	Fibrillin-1	74975.9
SC22B_HUMAN	O75396	O75396	SEC22B	Vesicle-trafficking protein SEC22b	74923.6
PDCD6_HUMAN	O75340	O75340	PDCD6	Programmed cell death protein 6	74917.9
ABHEB_HUMAN	Q96IU4	Q96IU4	ABHD14B	Putative protein-lysine deacylase ABHD14B	74842.6
SYUG_HUMAN	O76070	O76070	SNCG	Gamma-synuclein	74802
THEM6_HUMAN	Q8WUY1	Q8WUY1	THEM6	Protein THEM6	74582.3
TCPH_HUMAN	Q99832	Q99832	CCT7	T-complex protein 1 subunit eta	74553.5
SUMO3_HUMAN	Q6EEV6;P61956;P55854	P55854	SUMO3	Small ubiquitin-related modifier 3	74482.4
SAE2_HUMAN	Q9UBT2	Q9UBT2	UBA2	SUMO-activating enzyme subunit 2	74449.8
TBCK_HUMAN	Q8TEA7	Q8TEA7	TBCK	TBC domain-containing protein kinase-like protein	74252.2
PSA3_HUMAN	P25788	P25788	PSMA3	Proteasome subunit alpha type-3	74154.9
PTBP1_HUMAN	P26599	P26599	PTBP1	Polypyrimidine tract-binding protein 1	74084
PCCB_HUMAN	P05166	P05166	PCCB	Propionyl-CoA carboxylase beta chain, mitochondrial	74002.4
FIBA_HUMAN	P02671	P02671	FGA	Fibrinogen alpha chain	73943.1
DPY30_HUMAN	Q9C005	Q9C005	DPY30	Protein dpy-30 homolog	73879.1
DOPD_HUMAN	A6NHG4;P30046	P30046	DDT	D-dopachrome decarboxylase	73834.6
ARC1B_HUMAN	O15143	O15143	ARPC1B	Actin-related protein 2/3 complex subunit 1B	73760.6
MYOF_HUMAN	Q9NZM1	Q9NZM1	MYOF	Myoferlin	73634.3
PSA_HUMAN	A6NEC2;P55786	P55786	NPEPPS	Puromycin-sensitive aminopeptidase	73612.3
RL23_HUMAN	P62829	P62829	RPL23	Large ribosomal subunit protein uL14	73313
ITB4_HUMAN	P16144	P16144	ITGB4	Integrin beta-4	73188.3
MAGT1_HUMAN	Q9H0U3	Q9H0U3	MAGT1	Magnesium transporter protein 1	73183.9
ETFA_HUMAN	P13804	P13804	ETFA	Electron transfer flavoprotein subunit alpha, mitochondrial	73166.1
PFKAM_HUMAN	P08237	P08237	PFKM	ATP-dependent 6-phosphofructokinase, muscle type	73030
CNN3_HUMAN	Q15417	Q15417	CNN3	Calponin-3	73001.2
SYSC_HUMAN	P49591	P49591	SARS1	Serine--tRNA ligase, cytoplasmic	72932.7
RPR1B_HUMAN	Q9NQG5	Q9NQG5	RPRD1B	Regulation of nuclear pre-mRNA domain-containing protein 1B	72917.3
DSRAD_HUMAN	P55265	P55265	ADAR	Double-stranded RNA-specific adenosine deaminase	72778
MAGD2_HUMAN	Q9UNF1	Q9UNF1	MAGED2	Melanoma-associated antigen D2	72752.7
S10A4_HUMAN	P26447	P26447	S100A4	Protein S100-A4	72580.3
ARK72_HUMAN	O43488	O43488	AKR7A2	Aflatoxin B1 aldehyde reductase member 2	72452.8
UGDH_HUMAN	O60701	O60701	UGDH	UDP-glucose 6-dehydrogenase	72177.7
SYAC_HUMAN	P49588	P49588	AARS1	Alanine--tRNA ligase, cytoplasmic	72152
G3BP1_HUMAN	Q13283	Q13283	G3BP1	Ras GTPase-activating protein-binding protein 1	71865.3
CSK21_HUMAN	Q8NEV1;P68400	P68400	CSNK2A1	Casein kinase II subunit alpha	71666.8
DBLOH_HUMAN	Q9NR28	Q9NR28	DIABLO	Diablo IAP-binding mitochondrial protein	71652.9
CC124_HUMAN	Q96CT7	Q96CT7	CCDC124	Coiled-coil domain-containing protein 124	71483
RL13A_HUMAN	Q6NVV1;P40429	P40429	RPL13A	Large ribosomal subunit protein uL13	71443.7
NU160_HUMAN	Q12769	Q12769	NUP160	Nuclear pore complex protein Nup160	71402.1
SYLM_HUMAN	Q15031	Q15031	LARS2	Leucine--tRNA ligase, mitochondrial	71357.1
NCKP1_HUMAN	Q9Y2A7	Q9Y2A7	NCKAP1	Nck-associated protein 1	71195.5
AKCL2_HUMAN	Q96JD6	Q96JD6	AKR1E2	1,5-anhydro-D-fructose reductase	71167.3
FLOT1_HUMAN	O75955	O75955	FLOT1	Flotillin-1	71158.2
NDUS3_HUMAN	O75489	O75489	NDUFS3	NADH dehydrogenase [ubiquinone] iron-sulfur protein 3, mitochondrial	71098
5MP1_HUMAN	Q9Y6E2	Q9Y6E2	BZW2	eIF5-mimic protein 1	70781.8
GSHR_HUMAN	P00390	P00390	GSR	Glutathione reductase, mitochondrial	70780.3
EIF3B_HUMAN	P55884	P55884	EIF3B	Eukaryotic translation initiation factor 3 subunit B	70758.7
CY1_HUMAN	P08574	P08574	CYC1	Cytochrome c1, heme protein, mitochondrial	70535
EIF3I_HUMAN	Q13347	Q13347	EIF3I	Eukaryotic translation initiation factor 3 subunit I	70444.1
LMAN2_HUMAN	Q12907	Q12907	LMAN2	Vesicular integral-membrane protein VIP36	70339.7
TPR_HUMAN	P12270	P12270	TPR	Nucleoprotein TPR	70304.9
RHG01_HUMAN	Q07960	Q07960	ARHGAP1	Rho GTPase-activating protein 1	70167.9
SRP09_HUMAN	P49458	P49458	SRP9	Signal recognition particle 9 kDa protein	70127.2
FPPS_HUMAN	P14324	P14324	FDPS	Farnesyl pyrophosphate synthase	70018.1
MGN2_HUMAN;MGN_HUMAN	Q96A72;P61326	P61326;Q96A72	MAGOH;MAGOHB	Protein mago nashi homolog	69801.4
ECHM_HUMAN	P30084	P30084	ECHS1	Enoyl-CoA hydratase, mitochondrial	69790.5
GSHB_HUMAN	P48637	P48637	GSS	Glutathione synthetase	69691
CYB5B_HUMAN	O43169	O43169	CYB5B	Cytochrome b5 type B	69673.9
GRB2_HUMAN	P62993	P62993	GRB2	Growth factor receptor-bound protein 2	69543.1
MARE1_HUMAN	Q15691	Q15691	MAPRE1	Microtubule-associated protein RP/EB family member 1	69457.8
MCCB_HUMAN	Q9HCC0	Q9HCC0	MCCC2	Methylcrotonoyl-CoA carboxylase beta chain, mitochondrial	69377.7
DCXR_HUMAN	Q7Z4W1	Q7Z4W1	DCXR	L-xylulose reductase	68988.6
MYG1_HUMAN	Q9HB07	Q9HB07	MYG1	MYG1 exonuclease	68621.4
TM9S4_HUMAN	Q92544	Q92544	TM9SF4	Transmembrane 9 superfamily member 4	68453.2
VATA_HUMAN	P38606	P38606	ATP6V1A	V-type proton ATPase catalytic subunit A	68294.3
H90B2_HUMAN	Q58FF8	Q58FF8	HSP90AB2P	Putative heat shock protein HSP 90-beta 2	68214.1
PGBM_HUMAN	P98160	P98160	HSPG2	Basement membrane-specific heparan sulfate proteoglycan core protein	68167.7
CX7A2_HUMAN	P14406	P14406	COX7A2	Cytochrome c oxidase subunit 7A2, mitochondrial	68039.5
TCEA1_HUMAN	Q15560;P23193	P23193	TCEA1	Transcription elongation factor A protein 1	68011.1
TXNL1_HUMAN	O43396	O43396	TXNL1	Thioredoxin-like protein 1	67959.6
SNAA_HUMAN	P54920	P54920	NAPA	Alpha-soluble NSF attachment protein	67886.2
FRIH_HUMAN	P02794	P02794	FTH1	Ferritin heavy chain	67822.8
COPG1_HUMAN	Q9Y678;Q9UBF2	Q9Y678	COPG1	Coatomer subunit gamma-1	67757.4
BT3L4_HUMAN	Q96K17	Q96K17	BTF3L4	Transcription factor BTF3 homolog 4	67556.8
THTR_HUMAN	Q16762	Q16762	TST	Thiosulfate sulfurtransferase	67350.5
PSB7_HUMAN	Q99436	Q99436	PSMB7	Proteasome subunit beta type-7	67314.4
TXND5_HUMAN	Q8NBS9	Q8NBS9	TXNDC5	Thioredoxin domain-containing protein 5	67009.3
NC2B_HUMAN	Q01658	Q01658	DR1	Protein Dr1	66995
GLOD4_HUMAN	Q9HC38	Q9HC38	GLOD4	Glyoxalase domain-containing protein 4	66916.1
SYLC_HUMAN	Q9P2J5	Q9P2J5	LARS1	Leucine--tRNA ligase, cytoplasmic	66896.1
PREP_HUMAN	Q5JRX3	Q5JRX3	PITRM1	Presequence protease, mitochondrial	66803.8
PRS8_HUMAN	P62195	P62195	PSMC5	26S proteasome regulatory subunit 8	66759.3
XRN2_HUMAN	Q9H0D6	Q9H0D6	XRN2	5'-3' exoribonuclease 2	66724.7
VTNC_HUMAN	P04004	P04004	VTN	Vitronectin	66707.8
UFL1_HUMAN	Q92845;O94874	O94874	UFL1	E3 UFM1-protein ligase 1	66698.5
CTBP2_HUMAN	P56545	P56545	CTBP2	C-terminal-binding protein 2	66570.9
TMX1_HUMAN	Q9H3N1	Q9H3N1	TMX1	Thioredoxin-related transmembrane protein 1	66509.3
CSK_HUMAN	P41240	P41240	CSK	Tyrosine-protein kinase CSK	66488
IF2B_HUMAN	P20042	P20042	EIF2S2	Eukaryotic translation initiation factor 2 subunit 2	66227.2
SKP1_HUMAN	P63208	P63208	SKP1	S-phase kinase-associated protein 1	66219.5
NP1L1_HUMAN	P55209	P55209	NAP1L1	Nucleosome assembly protein 1-like 1	66164.6
IF2A_HUMAN	P05198	P05198	EIF2S1	Eukaryotic translation initiation factor 2 subunit 1	66017.9
PDC6I_HUMAN	Q8WUM4	Q8WUM4	PDCD6IP	Programmed cell death 6-interacting protein	65683
ACLY_HUMAN	P53396	P53396	ACLY	ATP-citrate synthase	65654.1
PYM1_HUMAN	Q9BRP8	Q9BRP8	PYM1	Partner of Y14 and mago	65652.7
MTCH1_HUMAN	Q9NZJ7	Q9NZJ7	MTCH1	Mitochondrial carrier homolog 1	65641
CAN2_HUMAN	P17655	P17655	CAPN2	Calpain-2 catalytic subunit	65638.3
S10AD_HUMAN	Q99584	Q99584	S100A13	Protein S100-A13	65530.3
UB2D2_HUMAN	P62837;P61077	P62837	UBE2D2	Ubiquitin-conjugating enzyme E2 D2	65512.9
SF3A1_HUMAN	Q15459	Q15459	SF3A1	Splicing factor 3A subunit 1	65233.7
SMRC2_HUMAN	Q8TAQ2	Q8TAQ2	SMARCC2	SWI/SNF complex subunit SMARCC2	65150.7
TADBP_HUMAN	Q13148	Q13148	TARDBP	TAR DNA-binding protein 43	65101.4
AATC_HUMAN	P17174	P17174	GOT1	Aspartate aminotransferase, cytoplasmic	65060.8
FAAA_HUMAN	P16930	P16930	FAH	Fumarylacetoacetase	65043.2
VPS52_HUMAN	Q8N1B4	Q8N1B4	VPS52	Vacuolar protein sorting-associated protein 52 homolog	65031.4
RL11_HUMAN	P62913	P62913	RPL11	Large ribosomal subunit protein uL5	64707.5
PSMD5_HUMAN	Q16401	Q16401	PSMD5	26S proteasome non-ATPase regulatory subunit 5	64668
MBB1A_HUMAN	Q9BQG0	Q9BQG0	MYBBP1A	Myb-binding protein 1A	64418.8
RM12_HUMAN	P52815	P52815	MRPL12	Large ribosomal subunit protein bL12m	64305.7
TAP2_HUMAN	Q03519	Q03519	TAP2	Antigen peptide transporter 2	64294.2
NDUA9_HUMAN	Q16795	Q16795	NDUFA9	NADH dehydrogenase [ubiquinone] 1 alpha subcomplex subunit 9, mitochondrial	64088.6
VPS4B_HUMAN	O75351	O75351	VPS4B	Vacuolar protein sorting-associated protein 4B	64024.5
ISOC1_HUMAN	Q96CN7	Q96CN7	ISOC1	Isochorismatase domain-containing protein 1	63780.7
ITB6_HUMAN	P18564	P18564	ITGB6	Integrin beta-6	63750.8
AIP_HUMAN	O00170	O00170	AIP	AH receptor-interacting protein	63669.5
MCM7_HUMAN	P33993	P33993	MCM7	DNA replication licensing factor MCM7	63664.6
ERH_HUMAN	P84090	P84090	ERH	Enhancer of rudimentary homolog	63655.4
TES_HUMAN	Q9UGI8	Q9UGI8	TES	Testin	63641.8
AL4A1_HUMAN	P30038	P30038	ALDH4A1	Delta-1-pyrroline-5-carboxylate dehydrogenase, mitochondrial	63628.1
GFPT1_HUMAN	Q06210	Q06210	GFPT1	Glutamine--fructose-6-phosphate aminotransferase [isomerizing] 1	63584.2
PDCD5_HUMAN	O14737	O14737	PDCD5	Programmed cell death protein 5	63570.2
PUF60_HUMAN	Q9UHX1	Q9UHX1	PUF60	Poly(U)-binding-splicing factor PUF60	63563.6
UBXN1_HUMAN	Q04323	Q04323	UBXN1	UBX domain-containing protein 1	63527.9
AGR2_HUMAN	O95994	O95994	AGR2	Anterior gradient protein 2 homolog	63487
TMM33_HUMAN	P57088	P57088	TMEM33	Transmembrane protein 33	63244.7
NB5R1_HUMAN	Q9UHQ9	Q9UHQ9	CYB5R1	NADH-cytochrome b5 reductase 1	63178.3
ERGI1_HUMAN	Q969X5	Q969X5	ERGIC1	Endoplasmic reticulum-Golgi intermediate compartment protein 1	63060.9
LTOR3_HUMAN	Q9UHA4	Q9UHA4	LAMTOR3	Ragulator complex protein LAMTOR3	63057.2
ICLN_HUMAN	P54105	P54105	CLNS1A	Methylosome subunit pICln	62946.2
ADDA_HUMAN	P35611	P35611	ADD1	Alpha-adducin	62934.1
VA0D1_HUMAN	P61421	P61421	ATP6V0D1	V-type proton ATPase subunit d 1	62891.9
MYL4_HUMAN	P12829	P12829	MYL4	Myosin light chain 4	62883.7
PDC10_HUMAN	Q9BUL8	Q9BUL8	PDCD10	Programmed cell death protein 10	62881.2
MYO1C_HUMAN	O00159	O00159	MYO1C	Unconventional myosin-Ic	62853.1
TMEDA_HUMAN	P49755	P49755	TMED10	Transmembrane emp24 domain-containing protein 10	62847.5
CYRIB_HUMAN	Q9NUQ9	Q9NUQ9	CYRIB	CYFIP-related Rac1 interactor B	62845.9
TFR1_HUMAN	P02786	P02786	TFRC	Transferrin receptor protein 1	62742.2
SP16H_HUMAN	Q9Y5B9	Q9Y5B9	SUPT16H	FACT complex subunit SPT16	62663.7
PREB_HUMAN	Q9HCU5	Q9HCU5	PREB	Prolactin regulatory element-binding protein	62657
SRRT_HUMAN	Q9BXP5	Q9BXP5	SRRT	Serrate RNA effector molecule homolog	62597
PSA7_HUMAN	O14818	O14818	PSMA7	Proteasome subunit alpha type-7	62434.9
IDH3A_HUMAN	P50213	P50213	IDH3A	Isocitrate dehydrogenase [NAD] subunit alpha, mitochondrial	62421.8
VAMP8_HUMAN	Q9BV40	Q9BV40	VAMP8	Vesicle-associated membrane protein 8	62379.8
IVD_HUMAN	P26440	P26440	IVD	Isovaleryl-CoA dehydrogenase, mitochondrial	62128.2
AGRIN_HUMAN	O00468	O00468	AGRN	Agrin	62034.4
TBCB_HUMAN	Q99426	Q99426	TBCB	Tubulin-folding cofactor B	61922.2
NAGK_HUMAN	Q9UJ70	Q9UJ70	NAGK	N-acetyl-D-glucosamine kinase	61880.2
ODP2_HUMAN	P10515	P10515	DLAT	Dihydrolipoyllysine-residue acetyltransferase component of pyruvate dehydrogenase complex, mitochondrial	61750.4
CD47_HUMAN	Q08722	Q08722	CD47	Leukocyte surface antigen CD47	61742.9
VASN_HUMAN	Q6EMK4	Q6EMK4	VASN	Vasorin	61694.7
NSF_HUMAN	P46459	P46459	NSF	Vesicle-fusing ATPase	61686
CHD4_HUMAN	Q14839	Q14839	CHD4	Chromodomain-helicase-DNA-binding protein 4	61581.7
P5CS_HUMAN	P54886	P54886	ALDH18A1	Delta-1-pyrroline-5-carboxylate synthase	61475.3
DLRB1_HUMAN	Q9NP97;Q8TF09	Q9NP97	DYNLRB1	Dynein light chain roadblock-type 1	61207.9
H2B1A_HUMAN	Q96A08	Q96A08	H2BC1	Histone H2B type 1-A	61144.4
PRP19_HUMAN	Q9UMS4	Q9UMS4	PRPF19	Pre-mRNA-processing factor 19	61120.4
ABCF1_HUMAN	Q8NE71	Q8NE71	ABCF1	ATP-binding cassette sub-family F member 1	61089
NOLC1_HUMAN	Q14978	Q14978	NOLC1	Nucleolar and coiled-body phosphoprotein 1	61073.8
MRP_HUMAN	P49006	P49006	MARCKSL1	MARCKS-related protein	60987.9
RL10_HUMAN	P27635	P27635	RPL10	Large ribosomal subunit protein uL16	60983.3
MYADM_HUMAN	Q96S97	Q96S97	MYADM	Myeloid-associated differentiation marker	60963
AP2B1_HUMAN	Q10567;P63010	P63010	AP2B1	AP-2 complex subunit beta	60843.6
HMGB3_HUMAN	O15347	O15347	HMGB3	High mobility group protein B3	60824.8
ODBA_HUMAN	P12694	P12694	BCKDHA	2-oxoisovalerate dehydrogenase subunit alpha, mitochondrial	60791
K2026_HUMAN	Q5HYC2	Q5HYC2	KIAA2026	Uncharacterized protein KIAA2026	60671.9
PAK4_HUMAN	O96013	O96013	PAK4	Serine/threonine-protein kinase PAK 4	60442.4
CPSF6_HUMAN	Q16630	Q16630	CPSF6	Cleavage and polyadenylation specificity factor subunit 6	60328.6
EMIL1_HUMAN	Q9Y6C2	Q9Y6C2	EMILIN1	EMILIN-1	60214.7
IPO4_HUMAN	Q8TEX9	Q8TEX9	IPO4	Importin-4	60203.2
PP1A_HUMAN	P62136	P62136	PPP1CA	Serine/threonine-protein phosphatase PP1-alpha catalytic subunit	60174.1
SYDM_HUMAN	Q6PI48	Q6PI48	DARS2	Aspartate--tRNA ligase, mitochondrial	60122.6
IF2B3_HUMAN	O00425	O00425	IGF2BP3	Insulin-like growth factor 2 mRNA-binding protein 3	60077.1
ADDG_HUMAN	Q9UEY8	Q9UEY8	ADD3	Gamma-adducin	59976.7
PP1B_HUMAN	P62140	P62140	PPP1CB	Serine/threonine-protein phosphatase PP1-beta catalytic subunit	59845
MCTS1_HUMAN	Q9ULC4;A0A3B3IRV3	Q9ULC4	MCTS1	Malignant T-cell-amplified sequence 1	59842.1
RALYL_HUMAN	Q86SE5	Q86SE5	RALYL	RNA-binding Raly-like protein	59831.6
PP1R7_HUMAN	Q15435	Q15435	PPP1R7	Protein phosphatase 1 regulatory subunit 7	59829
RHOA_HUMAN	P61586	P61586	RHOA	Transforming protein RhoA	59787.2
LC7L2_HUMAN	Q9Y383	Q9Y383	LUC7L2	Putative RNA-binding protein Luc7-like 2	59782.5
FAS_HUMAN	P49327	P49327	FASN	Fatty acid synthase	59778.6
AT2B4_HUMAN	P23634;P20020	P23634	ATP2B4	Plasma membrane calcium-transporting ATPase 4	59492.8
DDX27_HUMAN	Q96GQ7	Q96GQ7	DDX27	Probable ATP-dependent RNA helicase DDX27	59373.9
EIF3D_HUMAN	O15371	O15371	EIF3D	Eukaryotic translation initiation factor 3 subunit D	59340
MCCA_HUMAN	Q96RQ3	Q96RQ3	MCCC1	Methylcrotonoyl-CoA carboxylase subunit alpha, mitochondrial	59225.9
MYPT1_HUMAN	O14974	O14974	PPP1R12A	Protein phosphatase 1 regulatory subunit 12A	59212.7
PCYOX_HUMAN	Q9UHG3	Q9UHG3	PCYOX1	Prenylcysteine oxidase 1	59116.2
CISD2_HUMAN	Q8N5K1	Q8N5K1	CISD2	CDGSH iron-sulfur domain-containing protein 2	59114.1
ARGL1_HUMAN	Q9NWB6	Q9NWB6	ARGLU1	Arginine and glutamate-rich protein 1	59101
PGM2_HUMAN	Q96G03	Q96G03	PGM2	Phosphopentomutase	59077.1
NSF1C_HUMAN	Q9UNZ2	Q9UNZ2	NSFL1C	NSFL1 cofactor p47	59061.1
SEPT9_HUMAN	Q9UHD8	Q9UHD8	SEPTIN9	Septin-9	59015.1
SYFA_HUMAN	Q9Y285	Q9Y285	FARSA	Phenylalanine--tRNA ligase alpha subunit	58875.8
HIBCH_HUMAN	Q6NVY1	Q6NVY1	HIBCH	3-hydroxyisobutyryl-CoA hydrolase, mitochondrial	58817.7
DDAH1_HUMAN	O94760	O94760	DDAH1	N(G),N(G)-dimethylarginine dimethylaminohydrolase 1	58754.2
QCR2_HUMAN	P22695	P22695	UQCRC2	Cytochrome b-c1 complex subunit 2, mitochondrial	58732
SYTC_HUMAN	P26639;A2RTX5	P26639	TARS1	Threonine--tRNA ligase 1, cytoplasmic	58657.3
NIPS1_HUMAN	Q9BPW8	Q9BPW8	NIPSNAP1	Protein NipSnap homolog 1	58651.1
ERLN2_HUMAN	O94905	O94905	ERLIN2	Erlin-2	58573.7
TCRG1_HUMAN	O14776	O14776	TCERG1	Transcription elongation regulator 1	58571.9
KINH_HUMAN	O60282;P33176;Q12840	P33176	KIF5B	Kinesin-1 heavy chain	58495.7
EMAL4_HUMAN	Q9HC35	Q9HC35	EML4	Echinoderm microtubule-associated protein-like 4	58292.2
EIF3L_HUMAN	Q9Y262	Q9Y262	EIF3L	Eukaryotic translation initiation factor 3 subunit L	58268.8
CDC42_HUMAN	P60953	P60953	CDC42	Cell division control protein 42 homolog	58255.1
DNM1L_HUMAN	O00429	O00429	DNM1L	Dynamin-1-like protein	58224.7
HNRH2_HUMAN	P55795	P55795	HNRNPH2	Heterogeneous nuclear ribonucleoprotein H2	58198.7
CSTF2_HUMAN	Q9H0L4;P33240	P33240	CSTF2	Cleavage stimulation factor subunit 2	58185.4
UGGG1_HUMAN	Q9NYU2	Q9NYU2	UGGT1	UDP-glucose:glycoprotein glucosyltransferase 1	58159.3
PFD6_HUMAN	O15212	O15212	PFDN6	Prefoldin subunit 6	58156.1
NDUS2_HUMAN	O75306	O75306	NDUFS2	NADH dehydrogenase [ubiquinone] iron-sulfur protein 2, mitochondrial	58084.1
NNTM_HUMAN	Q13423	Q13423	NNT	NAD(P) transhydrogenase, mitochondrial	58055.1
SPS1_HUMAN	P49903	P49903	SEPHS1	Selenide, water dikinase 1	58035.1
TOM34_HUMAN	Q15785	Q15785	TOMM34	Mitochondrial import receptor subunit TOM34	57997.1
CPSF5_HUMAN	O43809	O43809	NUDT21	Cleavage and polyadenylation specificity factor subunit 5	57645.7
MTA2_HUMAN	O94776	O94776	MTA2	Metastasis-associated protein MTA2	57637.8
EF1B_HUMAN	P24534	P24534	EEF1B2	Elongation factor 1-beta	57508.6
G6PD_HUMAN	P11413	P11413	G6PD	Glucose-6-phosphate 1-dehydrogenase	57455.1
LONM_HUMAN	P36776	P36776	LONP1	Lon protease homolog, mitochondrial	57452.4
MIME_HUMAN	P20774	P20774	OGN	Mimecan	57441.9
UCHL3_HUMAN	P15374	P15374	UCHL3	Ubiquitin carboxyl-terminal hydrolase isozyme L3	57182.4
LHPP_HUMAN	Q9H008	Q9H008	LHPP	Phospholysine phosphohistidine inorganic pyrophosphate phosphatase	57138.9
AP2M1_HUMAN	Q96CW1	Q96CW1	AP2M1	AP-2 complex subunit mu	57019.6
GTPB4_HUMAN	Q9BZE4	Q9BZE4	GTPBP4	GTP-binding protein 4	56985.7
NCPR_HUMAN	P16435	P16435	POR	NADPH--cytochrome P450 reductase	56982.4
NICA_HUMAN	Q92542	Q92542	NCSTN	Nicastrin	56972.6
RFC4_HUMAN	P35249	P35249	RFC4	Replication factor C subunit 4	56891.3
CHM4B_HUMAN	Q9H444;Q96CF2	Q9H444	CHMP4B	Charged multivesicular body protein 4b	56752.1
YBOX1_HUMAN	P16989;P67809;Q9Y2T7	P67809	YBX1	Y-box-binding protein 1	56639.6
TSN_HUMAN	Q15631	Q15631	TSN	Translin	56544.1
FKBP9_HUMAN	O95302	O95302	FKBP9	Peptidyl-prolyl cis-trans isomerase FKBP9	56519.4
TOM20_HUMAN	Q15388	Q15388	TOMM20	Mitochondrial import receptor subunit TOM20 homolog	56360.3
NTF2_HUMAN	P61970	P61970	NUTF2	Nuclear transport factor 2	56326.9
NUDC_HUMAN	Q9Y266	Q9Y266	NUDC	Nuclear migration protein nudC	56222.7
CSK2B_HUMAN	P67870	P67870	CSNK2B	Casein kinase II subunit beta	56151
RANG_HUMAN	P43487	P43487	RANBP1	Ran-specific GTPase-activating protein	56128.5
TOM70_HUMAN	O94826	O94826	TOMM70	Mitochondrial import receptor subunit TOM70	56095.6
OGT1_HUMAN	O15294	O15294	OGT	UDP-N-acetylglucosamine--peptide N-acetylglucosaminyltransferase 110 kDa subunit	56038
RN213_HUMAN	Q63HN8	Q63HN8	RNF213	E3 ubiquitin-protein ligase RNF213	56020.6
NPTN_HUMAN	Q9Y639	Q9Y639	NPTN	Neuroplastin	55998.3
CX6B1_HUMAN	P14854	P14854	COX6B1	Cytochrome c oxidase subunit 6B1	55953
ZC3HF_HUMAN	Q8WU90	Q8WU90	ZC3H15	Zinc finger CCCH domain-containing protein 15	55819.7
SC23A_HUMAN	Q15436	Q15436	SEC23A	Protein transport protein Sec23A	55758.3
SEPT7_HUMAN	Q16181	Q16181	SEPTIN7	Septin-7	55742.7
ACTZ_HUMAN	P61163	P61163	ACTR1A	Alpha-centractin	55667.5
KLH14_HUMAN	Q9P2G3	Q9P2G3	KLHL14	Kelch-like protein 14	55510.5
KTN1_HUMAN	Q86UP2	Q86UP2	KTN1	Kinectin	55355
PUR6_HUMAN	P22234	P22234	PAICS	Bifunctional phosphoribosylaminoimidazole carboxylase/phosphoribosylaminoimidazole succinocarboxamide synthetase	55330.7
PEF1_HUMAN	Q9UBV8	Q9UBV8	PEF1	Peflin	55306.8
RL38_HUMAN	P63173	P63173	RPL38	Large ribosomal subunit protein eL38	55266.1
SNUT2_HUMAN	Q53GS9	Q53GS9	USP39	U4/U6.U5 tri-snRNP-associated protein 2	55208.9
DCPS_HUMAN	Q96C86	Q96C86	DCPS	m7GpppX diphosphatase	55198
DSC2_HUMAN	Q14574;Q02487	Q02487	DSC2	Desmocollin-2	55137.7
NDUS8_HUMAN	O00217	O00217	NDUFS8	NADH dehydrogenase [ubiquinone] iron-sulfur protein 8, mitochondrial	55136.7
DRB3_HUMAN	P79483	P79483	HLA-DRB3	HLA class II histocompatibility antigen, DR beta 3 chain	55091.9
ACTN2_HUMAN	P35609	P35609	ACTN2	Alpha-actinin-2	55074.4
H1X_HUMAN	Q92522	Q92522	H1-10	Histone H1.10	55064.4
LYRIC_HUMAN	Q86UE4	Q86UE4	MTDH	Protein LYRIC	55003.9
SMCA4_HUMAN	P51531;P51532	P51532	SMARCA4	Transcription activator BRG1	54986.2
RMD3_HUMAN	Q96TC7	Q96TC7	RMDN3	Regulator of microtubule dynamics protein 3	54971.5
PRP8_HUMAN	Q6P2Q9	Q6P2Q9	PRPF8	Pre-mRNA-processing-splicing factor 8	54922.2
SNX3_HUMAN	O60493	O60493	SNX3	Sorting nexin-3	54810.7
TKFC_HUMAN	Q3LXA3	Q3LXA3	TKFC	Triokinase/FMN cyclase	54799.6
NTPCR_HUMAN	Q9BSD7	Q9BSD7	NTPCR	Cancer-related nucleoside-triphosphatase	54745.5
PFD1_HUMAN	O60925	O60925	PFDN1	Prefoldin subunit 1	54699.6
DERL1_HUMAN	Q9BUN8	Q9BUN8	DERL1	Derlin-1	54624.8
LBR_HUMAN	Q14739	Q14739	LBR	Delta(14)-sterol reductase LBR	54494
CLD6_HUMAN	P56747	P56747	CLDN6	Claudin-6	54447
PSMD2_HUMAN	Q13200	Q13200	PSMD2	26S proteasome non-ATPase regulatory subunit 2	54414.5
MX1_HUMAN	P20591	P20591	MX1	Interferon-induced GTP-binding protein Mx1	54397.4
POSTN_HUMAN	Q15063	Q15063	POSTN	Periostin	54345.3
F10A1_HUMAN	P50502;Q8NFI4	P50502	ST13	Hsc70-interacting protein	54265.1
ARHG2_HUMAN	Q92974	Q92974	ARHGEF2	Rho guanine nucleotide exchange factor 2	54219
GORS2_HUMAN	Q9H8Y8	Q9H8Y8	GORASP2	Golgi reassembly-stacking protein 2	54130.9
LYAG_HUMAN	P10253	P10253	GAA	Lysosomal alpha-glucosidase	53999.4
SPF45_HUMAN	Q96I25	Q96I25	RBM17	Splicing factor 45	53950.1
TPP1_HUMAN	O14773	O14773	TPP1	Tripeptidyl-peptidase 1	53830.7
SC31A_HUMAN	O94979	O94979	SEC31A	Protein transport protein Sec31A	53761.9
IF2B2_HUMAN	Q9Y6M1	Q9Y6M1	IGF2BP2	Insulin-like growth factor 2 mRNA-binding protein 2	53760.6
HXB4_HUMAN	P17483	P17483	HOXB4	Homeobox protein Hox-B4	53756.7
MYH10_HUMAN	P35580;Q7Z406	P35580	MYH10	Myosin-10	53750
TMA7B_HUMAN;TMA7_HUMAN	Q9Y2S6;A0A024R1R8	A0A024R1R8;Q9Y2S6	TMA7;TMA7B	Translation machinery-associated protein 7B	53647.9
UBR4_HUMAN	Q5T4S7	Q5T4S7	UBR4	E3 ubiquitin-protein ligase UBR4	53591.4
SYSM_HUMAN	Q9NP81	Q9NP81	SARS2	Serine--tRNA ligase, mitochondrial	53564.2
ZN207_HUMAN	O43670	O43670	ZNF207	BUB3-interacting and GLEBS motif-containing protein ZNF207	53542.3
CBX3_HUMAN	Q13185	Q13185	CBX3	Chromobox protein homolog 3	53526.3
ZA2G_HUMAN	P25311	P25311	AZGP1	Zinc-alpha-2-glycoprotein	53469.7
GSTM3_HUMAN	P21266	P21266	GSTM3	Glutathione S-transferase Mu 3	53366.1
HLAA_HUMAN	P04439	P04439	HLA-A	HLA class I histocompatibility antigen, A alpha chain	53211.4
PODXL_HUMAN	O00592	O00592	PODXL	Podocalyxin	53198
HTRA2_HUMAN	O43464;P83110	O43464	HTRA2	Serine protease HTRA2, mitochondrial	53172.5
OAS3_HUMAN	Q9Y6K5	Q9Y6K5	OAS3	2'-5'-oligoadenylate synthase 3	53016
PBIP1_HUMAN	Q96AQ6	Q96AQ6	PBXIP1	Pre-B-cell leukemia transcription factor-interacting protein 1	53008.2
KAP0_HUMAN	P10644	P10644	PRKAR1A	cAMP-dependent protein kinase type I-alpha regulatory subunit	52876.2
TXTP_HUMAN	P53007	P53007	SLC25A1	Tricarboxylate transport protein, mitochondrial	52861.6
IL21_HUMAN	Q9HBE4	Q9HBE4	IL21	Interleukin-21	52752.2
EWS_HUMAN	Q01844	Q01844	EWSR1	RNA-binding protein EWS	52752.1
DRG1_HUMAN	Q9Y295	Q9Y295	DRG1	Developmentally-regulated GTP-binding protein 1	52739.9
ILEU_HUMAN	P30740	P30740	SERPINB1	Leukocyte elastase inhibitor	52687.2
PNPT1_HUMAN	Q8TCS8	Q8TCS8	PNPT1	Polyribonucleotide nucleotidyltransferase 1, mitochondrial	52633.3
AK1C3_HUMAN	P42330	P42330	AKR1C3	Aldo-keto reductase family 1 member C3	52630.1
PRP6_HUMAN	O94906	O94906	PRPF6	Pre-mRNA-processing factor 6	52606.7
IF2G_HUMAN	Q2VIR3;P41091	P41091	EIF2S3	Eukaryotic translation initiation factor 2 subunit 3	52487.5
CN37_HUMAN	P09543	P09543	CNP	2',3'-cyclic-nucleotide 3'-phosphodiesterase	52367.8
KV37_HUMAN	A0A075B6H7;A0A0C4DH90;A0A0C4DH55;P01624	A0A075B6H7	IGKV3-7	Probable non-functional immunoglobulin kappa variable 3-7	52362.8
RASN_HUMAN	P01111;P01112	P01111	NRAS	GTPase NRas	52358.4
VAPA_HUMAN	Q9P0L0	Q9P0L0	VAPA	Vesicle-associated membrane protein-associated protein A	52292.3
PRS4_HUMAN	P62191	P62191	PSMC1	26S proteasome regulatory subunit 4	52281.3
AN32E_HUMAN	Q9BTT0	Q9BTT0	ANP32E	Acidic leucine-rich nuclear phosphoprotein 32 family member E	52212.1
PRS7_HUMAN	P35998	P35998	PSMC2	26S proteasome regulatory subunit 7	52196.1
TP53B_HUMAN	Q12888	Q12888	TP53BP1	TP53-binding protein 1	52163.9
DJB11_HUMAN	Q9UBS4	Q9UBS4	DNAJB11	DnaJ homolog subfamily B member 11	52162.3
REEP5_HUMAN	Q00765	Q00765	REEP5	Receptor expression-enhancing protein 5	52137
ACOT1_HUMAN	Q86TX2;P49753	Q86TX2	ACOT1	Acyl-coenzyme A thioesterase 1	52002.5
DREB_HUMAN	Q16643	Q16643	DBN1	Drebrin	51985.5
GRAN_HUMAN	P28676	P28676	GCA	Grancalcin	51959.8
PPCE_HUMAN	P48147	P48147	PREP	Prolyl endopeptidase	51945.7
RFA1_HUMAN	P27694	P27694	RPA1	Replication protein A 70 kDa DNA-binding subunit	51931.4
MK14_HUMAN	Q16539	Q16539	MAPK14	Mitogen-activated protein kinase 14	51929.4
CO3A1_HUMAN	P02461	P02461	COL3A1	Collagen alpha-1(III) chain	51839.8
SELH_HUMAN	Q8IZQ5	Q8IZQ5	SELENOH	Selenoprotein H	51828.5
ADT1_HUMAN	P12235	P12235	SLC25A4	ADP/ATP translocase 1	51809.8
CPSF7_HUMAN	Q8N684	Q8N684	CPSF7	Cleavage and polyadenylation specificity factor subunit 7	51742.1
PI42C_HUMAN	Q8TBX8	Q8TBX8	PIP4K2C	Phosphatidylinositol 5-phosphate 4-kinase type-2 gamma	51624
SR140_HUMAN	O15042	O15042	U2SURP	U2 snRNP-associated SURP motif-containing protein	51580.5
PSMD9_HUMAN	O00233	O00233	PSMD9	26S proteasome non-ATPase regulatory subunit 9	51459.4
CNOT1_HUMAN	A5YKK6	A5YKK6	CNOT1	CCR4-NOT transcription complex subunit 1	51454.9
XPO7_HUMAN	Q9UIA9	Q9UIA9	XPO7	Exportin-7	51429.4
SPCS2_HUMAN	Q15005	Q15005	SPCS2	Signal peptidase complex subunit 2	51425.2
CEP85_HUMAN	Q6P2H3	Q6P2H3	CEP85	Centrosomal protein of 85 kDa	51391.2
TOIP1_HUMAN	Q5JTV8	Q5JTV8	TOR1AIP1	Torsin-1A-interacting protein 1	51388.7
DCTN1_HUMAN	Q14203	Q14203	DCTN1	Dynactin subunit 1	51341.7
ABHGA_HUMAN	O95870	O95870	ABHD16A	Phosphatidylserine lipase ABHD16A	51311.2
PSD13_HUMAN	Q9UNM6	Q9UNM6	PSMD13	26S proteasome non-ATPase regulatory subunit 13	51303.5
NDUB4_HUMAN	O95168	O95168	NDUFB4	NADH dehydrogenase [ubiquinone] 1 beta subcomplex subunit 4	51296.2
GCDH_HUMAN	Q92947	Q92947	GCDH	Glutaryl-CoA dehydrogenase, mitochondrial	51260.9
SRS11_HUMAN	Q05519	Q05519	SRSF11	Serine/arginine-rich splicing factor 11	51176.4
MK03_HUMAN	P27361	P27361	MAPK3	Mitogen-activated protein kinase 3	51120.2
DPP3_HUMAN	Q9NY33	Q9NY33	DPP3	Dipeptidyl peptidase 3	51076.4
RPE_HUMAN	Q96AT9	Q96AT9	RPE	Ribulose-phosphate 3-epimerase	50834
CK054_HUMAN	Q9H0W9	Q9H0W9	C11orf54	Ester hydrolase C11orf54	50760.5
ARMX1_HUMAN	Q9P291	Q9P291	ARMCX1	Armadillo repeat-containing X-linked protein 1	50703.7
PGAM5_HUMAN	Q96HS1	Q96HS1	PGAM5	Serine/threonine-protein phosphatase PGAM5, mitochondrial	50686.4
STAU1_HUMAN	O95793	O95793	STAU1	Double-stranded RNA-binding protein Staufen homolog 1	50658.8
SAP18_HUMAN	O00422	O00422	SAP18	Histone deacetylase complex subunit SAP18	50565.5
AMBP_HUMAN	P02760	P02760	AMBP	Protein AMBP	50503
CERS4_HUMAN	Q9HA82	Q9HA82	CERS4	Ceramide synthase 4	50492.9
HSPB6_HUMAN	O14558	O14558	HSPB6	Heat shock protein beta-6	50432.8
RUXF_HUMAN	P62306	P62306	SNRPF	Small nuclear ribonucleoprotein F	50430.3
PIMT_HUMAN	P22061	P22061	PCMT1	Protein-L-isoaspartate(D-aspartate) O-methyltransferase	50427.1
PAK1_HUMAN	Q13153	Q13153	PAK1	Serine/threonine-protein kinase PAK 1	50408.4
NDUV1_HUMAN	P49821	P49821	NDUFV1	NADH dehydrogenase [ubiquinone] flavoprotein 1, mitochondrial	50364.3
DHRS1_HUMAN	Q96LJ7	Q96LJ7	DHRS1	Dehydrogenase/reductase SDR family member 1	50253.8
GCN1_HUMAN	Q92616	Q92616	GCN1	Stalled ribosome sensor GCN1	50213
ATX2L_HUMAN	Q8WWM7	Q8WWM7	ATXN2L	Ataxin-2-like protein	50206.5
MCM3_HUMAN	P25205	P25205	MCM3	DNA replication licensing factor MCM3	50205.4
RT27_HUMAN	Q92552	Q92552	MRPS27	Small ribosomal subunit protein mS27	50169.1
PSB8_HUMAN	P28062	P28062	PSMB8	Proteasome subunit beta type-8	50132.9
FLII_HUMAN	Q13045	Q13045	FLII	Protein flightless-1 homolog	50114.3
UFC1_HUMAN	Q9Y3C8	Q9Y3C8	UFC1	Ubiquitin-fold modifier-conjugating enzyme 1	50082.1
TACD2_HUMAN	P09758	P09758	TACSTD2	Tumor-associated calcium signal transducer 2	50076.1
PCY1A_HUMAN	P49585	P49585	PCYT1A	Choline-phosphate cytidylyltransferase A	50024.8
NCOA5_HUMAN	Q9HCD5	Q9HCD5	NCOA5	Nuclear receptor coactivator 5	49984.1
HS105_HUMAN	Q92598	Q92598	HSPH1	Heat shock protein 105 kDa	49866.7
PSA2_HUMAN	P25787	P25787	PSMA2	Proteasome subunit alpha type-2	49833.7
VATB2_HUMAN	P21281	P21281	ATP6V1B2	V-type proton ATPase subunit B, brain isoform	49826.5
PTGR1_HUMAN	Q14914	Q14914	PTGR1	Prostaglandin reductase 1	49790.3
KNG1_HUMAN	P01042	P01042	KNG1	Kininogen-1	49775.9
CATZ_HUMAN	Q9UBR2	Q9UBR2	CTSZ	Cathepsin Z	49744.1
TMM43_HUMAN	Q9BTV4	Q9BTV4	TMEM43	Transmembrane protein 43	49710.7
FAF2_HUMAN	Q96CS3	Q96CS3	FAF2	FAS-associated factor 2	49690.8
PCNA_HUMAN	P12004	P12004	PCNA	Proliferating cell nuclear antigen	49559
DHX30_HUMAN	Q7L2E3	Q7L2E3	DHX30	ATP-dependent RNA helicase DHX30	49539.6
LYSC_HUMAN	P61626	P61626	LYZ	Lysozyme C	49537.4
VAMP5_HUMAN	O95183	O95183	VAMP5	Vesicle-associated membrane protein 5	49518.7
EIF3G_HUMAN	O75821	O75821	EIF3G	Eukaryotic translation initiation factor 3 subunit G	49216.5
TAGL_HUMAN	Q01995	Q01995	TAGLN	Transgelin	49046.5
AP2A1_HUMAN	O95782	O95782	AP2A1	AP-2 complex subunit alpha-1	49021.4
OAT_HUMAN	P04181	P04181	OAT	Ornithine aminotransferase, mitochondrial	49009
USO1_HUMAN	O60763	O60763	USO1	General vesicular transport factor p115	48893.7
ITPI2_HUMAN	P28290	P28290	ITPRID2	Protein ITPRID2	48729.2
MAOM_HUMAN	P23368	P23368	ME2	NAD-dependent malic enzyme, mitochondrial	48684.8
ITB1_HUMAN	P05556	P05556	ITGB1	Integrin beta-1	48636.1
PCKGM_HUMAN	Q16822	Q16822	PCK2	Phosphoenolpyruvate carboxykinase [GTP], mitochondrial	48614.3
NIT1_HUMAN	Q86X76	Q86X76	NIT1	Deaminated glutathione amidase	48566.3
PURA2_HUMAN	P30520	P30520	ADSS2	Adenylosuccinate synthetase isozyme 2	48485.7
AUHM_HUMAN	Q13825	Q13825	AUH	Methylglutaconyl-CoA hydratase, mitochondrial	48390.8
CCAR1_HUMAN	Q8IX12	Q8IX12	CCAR1	Cell division cycle and apoptosis regulator protein 1	48380.7
NAMPT_HUMAN	P43490	P43490	NAMPT	Nicotinamide phosphoribosyltransferase	48377.9
B3AT_HUMAN	P02730	P02730	SLC4A1	Band 3 anion transport protein	48349.6
PSD11_HUMAN	O00231	O00231	PSMD11	26S proteasome non-ATPase regulatory subunit 11	48265.8
ATIF1_HUMAN	Q9UII2	Q9UII2	ATP5IF1	ATPase inhibitor, mitochondrial	48263.3
FYCO1_HUMAN	Q9BQS8	Q9BQS8	FYCO1	FYVE and coiled-coil domain-containing protein 1	48183.5
RM19_HUMAN	P49406	P49406	MRPL19	Large ribosomal subunit protein bL19m	48162.5
IF4A2_HUMAN	Q14240	Q14240	EIF4A2	Eukaryotic initiation factor 4A-II	48139.7
RECQ1_HUMAN	P46063	P46063	RECQL	ATP-dependent DNA helicase Q1	48042.8
NNRE_HUMAN	Q8NCW5	Q8NCW5	NAXE	NAD(P)H-hydrate epimerase	48036.1
THIK_HUMAN	P09110	P09110	ACAA1	3-ketoacyl-CoA thiolase, peroxisomal	47934.6
WDR43_HUMAN	Q15061	Q15061	WDR43	WD repeat-containing protein 43	47885.2
WASF2_HUMAN	Q9Y6W5	Q9Y6W5	WASF2	Actin-binding protein WASF2	47876.7
HPBP1_HUMAN	Q9NZL4	Q9NZL4	HSPBP1	Hsp70-binding protein 1	47824.5
S2512_HUMAN	O75746	O75746	SLC25A12	Electrogenic aspartate/glutamate antiporter SLC25A12, mitochondrial	47806.5
KCY_HUMAN	P30085	P30085	CMPK1	UMP-CMP kinase	47665.8
WDR18_HUMAN	Q9BV38	Q9BV38	WDR18	WD repeat-containing protein 18	47660.4
SERC_HUMAN	Q9Y617	Q9Y617	PSAT1	Phosphoserine aminotransferase	47616.3
FRIL_HUMAN	P02792	P02792	FTL	Ferritin light chain	47543.6
TXD17_HUMAN	Q9BRA2	Q9BRA2	TXNDC17	Thioredoxin domain-containing protein 17	47527.4
PSB3_HUMAN	P49720	P49720	PSMB3	Proteasome subunit beta type-3	47498.4
ILKAP_HUMAN	Q9H0C8	Q9H0C8	ILKAP	Integrin-linked kinase-associated serine/threonine phosphatase 2C	47456.7
TRI23_HUMAN	P36406	P36406	TRIM23	E3 ubiquitin-protein ligase TRIM23	47177.5
PBX1_HUMAN	P40424;P40425;P40426	P40424	PBX1	Pre-B-cell leukemia transcription factor 1	47123.2
AIMP1_HUMAN	Q12904	Q12904	AIMP1	Aminoacyl tRNA synthase complex-interacting multifunctional protein 1	47083.2
GLRX5_HUMAN	Q86SX6	Q86SX6	GLRX5	Glutaredoxin-related protein 5, mitochondrial	46997.7
RBM12_HUMAN	Q9NTZ6	Q9NTZ6	RBM12	RNA-binding protein 12	46978.5
RDH13_HUMAN	Q8NBN7	Q8NBN7	RDH13	Retinol dehydrogenase 13	46956
SF3B4_HUMAN	Q15427	Q15427	SF3B4	Splicing factor 3B subunit 4	46923.8
NCLN_HUMAN	Q969V3	Q969V3	NCLN	BOS complex subunit NCLN	46874.3
LIN7C_HUMAN	Q9NUP9	Q9NUP9	LIN7C	Protein lin-7 homolog C	46765.4
CSTF3_HUMAN	Q12996	Q12996	CSTF3	Cleavage stimulation factor subunit 3	46760.2
KTHY_HUMAN	P23919	P23919	DTYMK	Thymidylate kinase	46732.1
PRS6B_HUMAN	P43686	P43686	PSMC4	26S proteasome regulatory subunit 6B	46725.9
AP1B1_HUMAN	Q10567	Q10567	AP1B1	AP-1 complex subunit beta-1	46703.7
CMBL_HUMAN	Q96DG6	Q96DG6	CMBL	Carboxymethylenebutenolidase homolog	46694
EIF3K_HUMAN	Q9UBQ5	Q9UBQ5	EIF3K	Eukaryotic translation initiation factor 3 subunit K	46655.8
NDUA4_HUMAN	O00483	O00483	NDUFA4	Cytochrome c oxidase subunit NDUFA4	46569.8
HV307_HUMAN	P01780	P01780	IGHV3-7	Immunoglobulin heavy variable 3-7	46510.3
HNRL1_HUMAN	Q9BUJ2	Q9BUJ2	HNRNPUL1	Heterogeneous nuclear ribonucleoprotein U-like protein 1	46428.9
HINT1_HUMAN	P49773	P49773	HINT1	Adenosine 5'-monophosphoramidase HINT1	46410.4
EIF3J_HUMAN	O75822	O75822	EIF3J	Eukaryotic translation initiation factor 3 subunit J	46392.1
MEP50_HUMAN	Q9BQA1	Q9BQA1	WDR77	Methylosome protein WDR77	46376.7
TYB4_HUMAN	P62328	P62328	TMSB4X	Thymosin beta-4	46363.6
RAB14_HUMAN	P61106	P61106	RAB14	Ras-related protein Rab-14	46337.8
PPAL_HUMAN	P11117	P11117	ACP2	Lysosomal acid phosphatase	46315.3
HUWE1_HUMAN	Q7Z6Z7	Q7Z6Z7	HUWE1	E3 ubiquitin-protein ligase HUWE1	46277.8
TSNAX_HUMAN	Q99598	Q99598	TSNAX	Translin-associated protein X	46248.4
SAR1A_HUMAN	Q9Y6B6;Q9NR31	Q9NR31	SAR1A	GTP-binding protein SAR1a	46204.6
SPRE_HUMAN	P35270	P35270	SPR	Sepiapterin reductase	46132.2
3HIDH_HUMAN	P31937	P31937	HIBADH	3-hydroxyisobutyrate dehydrogenase, mitochondrial	46111.2
TGT_HUMAN	Q9BXR0	Q9BXR0	QTRT1	Queuine tRNA-ribosyltransferase catalytic subunit 1	46107.8
TRXR1_HUMAN	Q16881	Q16881	TXNRD1	Thioredoxin reductase 1, cytoplasmic	46100.6
AK17A_HUMAN	Q02040	Q02040	AKAP17A	A-kinase anchor protein 17A	46074.1
RL28_HUMAN	P46779	P46779	RPL28	Large ribosomal subunit protein eL28	45966.7
HPCL1_HUMAN	P37235	P37235	HPCAL1	Hippocalcin-like protein 1	45912.5
ABCD3_HUMAN	P28288	P28288	ABCD3	ATP-binding cassette sub-family D member 3	45898
DNJB1_HUMAN	Q9UDY4;P25685	P25685	DNAJB1	DnaJ homolog subfamily B member 1	45872.3
SCO1_HUMAN	O75880	O75880	SCO1	Protein SCO1 homolog, mitochondrial	45869.5
MPPB_HUMAN	O75439	O75439	PMPCB	Mitochondrial-processing peptidase subunit beta	45823.4
PO210_HUMAN	Q8TEM1	Q8TEM1	NUP210	Nuclear pore membrane glycoprotein 210	45761.7
KV311_HUMAN;KVD11_HUMAN	A0A0A0MRZ8;P04433	A0A0A0MRZ8;P04433	IGKV3-11;IGKV3D-11	Immunoglobulin kappa variable 3D-11	45685.2
TIM13_HUMAN	Q9Y5L4	Q9Y5L4	TIMM13	Mitochondrial import inner membrane translocase subunit Tim13	45675
A2MG_HUMAN	P20742;P01023	P01023	A2M	Alpha-2-macroglobulin	45655.1
PDXD1_HUMAN	Q6P996	Q6P996	PDXDC1	Pyridoxal-dependent decarboxylase domain-containing protein 1	45588.8
IF5_HUMAN	P55010	P55010	EIF5	Eukaryotic translation initiation factor 5	45506.1
ACPH_HUMAN	P13798	P13798	APEH	Acylamino-acid-releasing enzyme	45495.4
PININ_HUMAN	Q9H307	Q9H307	PNN	Pinin	45470.9
TTL12_HUMAN	Q14166	Q14166	TTLL12	Tubulin--tyrosine ligase-like protein 12	45456.5
NDUBA_HUMAN	O96000	O96000	NDUFB10	NADH dehydrogenase [ubiquinone] 1 beta subcomplex subunit 10	45443.5
COPG2_HUMAN	Q9UBF2	Q9UBF2	COPG2	Coatomer subunit gamma-2	45427.4
PLD3_HUMAN	Q8IV08	Q8IV08	PLD3	5'-3' exonuclease PLD3	45417.6
STX7_HUMAN	O15400	O15400	STX7	Syntaxin-7	45411.3
M2OM_HUMAN	Q02978	Q02978	SLC25A11	Mitochondrial 2-oxoglutarate/malate carrier protein	45369.1
SAFB2_HUMAN	Q14151	Q14151	SAFB2	Scaffold attachment factor B2	45343.2
PA1B2_HUMAN	P68402	P68402	PAFAH1B2	Platelet-activating factor acetylhydrolase IB subunit alpha2	45282.9
KCRU_HUMAN	P12532	P12532	CKMT1B	Creatine kinase U-type, mitochondrial	45088.4
SAC1_HUMAN	Q9NTJ5	Q9NTJ5	SACM1L	Phosphatidylinositol-3-phosphatase SAC1	45084.8
L2GL2_HUMAN	Q6P1M3	Q6P1M3	LLGL2	LLGL scribble cell polarity complex component 2	45040.9
AHNK2_HUMAN	Q8IVF2	Q8IVF2	AHNAK2	Protein AHNAK2	45011.1
PSDE_HUMAN	O00487	O00487	PSMD14	26S proteasome non-ATPase regulatory subunit 14	44982.6
MCM6_HUMAN	Q14566	Q14566	MCM6	DNA replication licensing factor MCM6	44908.6
GPD1L_HUMAN	Q8N335	Q8N335	GPD1L	Glycerol-3-phosphate dehydrogenase 1-like protein	44904.5
CLIC4_HUMAN	Q9Y696	Q9Y696	CLIC4	Chloride intracellular channel protein 4	44900.3
NAA15_HUMAN	Q9BXJ9	Q9BXJ9	NAA15	N-alpha-acetyltransferase 15, NatA auxiliary subunit	44846.9
GALM_HUMAN	Q96C23	Q96C23	GALM	Galactose mutarotase	44796.4
PSMD1_HUMAN	Q99460	Q99460	PSMD1	26S proteasome non-ATPase regulatory subunit 1	44795.1
AMPD2_HUMAN	Q01433	Q01433	AMPD2	AMP deaminase 2	44618
GBB1_HUMAN	P62873	P62873	GNB1	Guanine nucleotide-binding protein G(I)/G(S)/G(T) subunit beta-1	44614.2
GDE_HUMAN	P35573	P35573	AGL	Glycogen debranching enzyme	44538.5
YKT6_HUMAN	O15498	O15498	YKT6	Synaptobrevin homolog YKT6	44522.1
DDX42_HUMAN	Q86XP3	Q86XP3	DDX42	ATP-dependent RNA helicase DDX42	44520.3
GBP1_HUMAN	P32455;Q9H0R5	P32455	GBP1	Guanylate-binding protein 1	44488.7
MSH2_HUMAN	P43246	P43246	MSH2	DNA mismatch repair protein Msh2	44408.3
CTL2_HUMAN	Q8IWA5	Q8IWA5	SLC44A2	Choline transporter-like protein 2	44288
HDHD3_HUMAN	Q9BSH5	Q9BSH5	HDHD3	Haloacid dehalogenase-like hydrolase domain-containing protein 3	44247.6
TXD12_HUMAN	O95881	O95881	TXNDC12	Thioredoxin domain-containing protein 12	44202
FKB1A_HUMAN	P62942	P62942	FKBP1A	Peptidyl-prolyl cis-trans isomerase FKBP1A	44185.6
ODB2_HUMAN	P11182	P11182	DBT	Lipoamide acyltransferase component of branched-chain alpha-keto acid dehydrogenase complex, mitochondrial	44156.5
PSMD8_HUMAN	P48556	P48556	PSMD8	26S proteasome non-ATPase regulatory subunit 8	44140.5
ICT1_HUMAN	Q14197	Q14197	MRPL58	Large ribosomal subunit protein mL62	44137.6
PLOD3_HUMAN	O60568	O60568	PLOD3	Multifunctional procollagen lysine hydroxylase and glycosyltransferase LH3	44119.6
SPON1_HUMAN	Q9HCB6	Q9HCB6	SPON1	Spondin-1	44045.3
NFASC_HUMAN	O94856	O94856	NFASC	Neurofascin	43975.9
PP2BA_HUMAN	P16298;P48454;Q08209	Q08209	PPP3CA	Protein phosphatase 3 catalytic subunit alpha	43871.3
CTNA2_HUMAN	P26232	P26232	CTNNA2	Catenin alpha-2	43827.1
WRIP1_HUMAN	Q96S55	Q96S55	WRNIP1	ATPase WRNIP1	43811.7
SODC_HUMAN	P00441	P00441	SOD1	Superoxide dismutase [Cu-Zn]	43802.3
PMVK_HUMAN	Q15126	Q15126	PMVK	Phosphomevalonate kinase	43736.8
SPCS3_HUMAN	P61009	P61009	SPCS3	Signal peptidase complex subunit 3	43624.5
TMED4_HUMAN	Q7Z7H5	Q7Z7H5	TMED4	Transmembrane emp24 domain-containing protein 4	43540.6
QORX_HUMAN	Q53FA7	Q53FA7	TP53I3	Quinone oxidoreductase PIG3	43478.6
ACAD9_HUMAN	Q9H845	Q9H845	ACAD9	Complex I assembly factor ACAD9, mitochondrial	43473.4
STMN2_HUMAN	Q93045	Q93045	STMN2	Stathmin-2	43454.8
CHM1B_HUMAN	Q7LBR1	Q7LBR1	CHMP1B	Charged multivesicular body protein 1b	43430.3
HEBP1_HUMAN	Q9NRV9	Q9NRV9	HEBP1	Heme-binding protein 1	43365.1
PAIP1_HUMAN	Q9H074	Q9H074	PAIP1	Polyadenylate-binding protein-interacting protein 1	43299.9
STING_HUMAN	Q86WV6	Q86WV6	STING1	Stimulator of interferon genes protein	43295.1
TNPO1_HUMAN	Q92973	Q92973	TNPO1	Transportin-1	43282.6
CRCC2_HUMAN	H7BZ55	H7BZ55	CROCC2	Ciliary rootlet coiled-coil protein 2	43275.4
RL17_HUMAN	P18621	P18621	RPL17	Large ribosomal subunit protein uL22	43268.5
MAGA4_HUMAN	P43358;P43361;A2A368;O60732;P43363;O15480;Q96M61;P43355;A8MXT2	P43358	MAGEA4	Melanoma-associated antigen 4	43259.4
LAS1L_HUMAN	Q9Y4W2	Q9Y4W2	LAS1L	Ribosomal biogenesis protein LAS1L	43200.1
LSM2_HUMAN	Q9Y333	Q9Y333	LSM2	U6 snRNA-associated Sm-like protein LSm2	43180.4
SPTC1_HUMAN	O15269	O15269	SPTLC1	Serine palmitoyltransferase 1	43130
CAH1_HUMAN	P00915	P00915	CA1	Carbonic anhydrase 1	43113
TB182_HUMAN	Q9C0C2	Q9C0C2	TNKS1BP1	182 kDa tankyrase-1-binding protein	43077.2
KAD4_HUMAN	P27144;A0A8I5KW96	P27144	AK4	Adenylate kinase 4, mitochondrial	43027.5
RAGP1_HUMAN	P46060	P46060	RANGAP1	Ran GTPase-activating protein 1	42952.7
RALB_HUMAN	P11234	P11234	RALB	Ras-related protein Ral-B	42952.3
SYYC_HUMAN	P54577	P54577	YARS1	Tyrosine--tRNA ligase, cytoplasmic	42846.5
PSMD7_HUMAN	P51665	P51665	PSMD7	26S proteasome non-ATPase regulatory subunit 7	42843.4
NOMO1_HUMAN	Q5JPE7;P69849;Q15155	Q15155	NOMO1	BOS complex subunit NOMO1	42817.4
CCS_HUMAN	O14618	O14618	CCS	Copper chaperone for superoxide dismutase	42781.2
MRE11_HUMAN	P49959	P49959	MRE11	Double-strand break repair protein MRE11	42768.3
SFXN3_HUMAN	Q9BWM7	Q9BWM7	SFXN3	Sideroflexin-3	42722.4
BLVRB_HUMAN	P30043	P30043	BLVRB	Flavin reductase (NADPH)	42700.5
CDC5L_HUMAN	Q99459	Q99459	CDC5L	Cell division cycle 5-like protein	42648.4
FA98A_HUMAN	Q8NCA5	Q8NCA5	FAM98A	Protein FAM98A	42621.7
DDX46_HUMAN	Q7L014	Q7L014	DDX46	Probable ATP-dependent RNA helicase DDX46	42600.6
COEA1_HUMAN	Q05707	Q05707	COL14A1	Collagen alpha-1(XIV) chain	42571.8
GLUCM_HUMAN	Q7Z3D6	Q7Z3D6	DGLUCY	D-glutamate cyclase, mitochondrial	42568.8
PSMD3_HUMAN	O43242	O43242	PSMD3	26S proteasome non-ATPase regulatory subunit 3	42559.4
FUBP3_HUMAN	Q96I24	Q96I24	FUBP3	Far upstream element-binding protein 3	42494.2
SON_HUMAN	P18583	P18583	SON	Protein SON	42463.8
SPT5H_HUMAN	O00267	O00267	SUPT5H	Transcription elongation factor SPT5	42461.1
NUP98_HUMAN	P52948	P52948	NUP98	Nuclear pore complex protein Nup98-Nup96	42431.2
E41L2_HUMAN	O43491	O43491	EPB41L2	Band 4.1-like protein 2	42411.4
PP1G_HUMAN	P36873	P36873	PPP1CC	Serine/threonine-protein phosphatase PP1-gamma catalytic subunit	42400.9
ESYT2_HUMAN	A0FGR8	A0FGR8	ESYT2	Extended synaptotagmin-2	42313.1
NELFB_HUMAN	Q8WX92	Q8WX92	NELFB	Negative elongation factor B	42294.8
DDRGK_HUMAN	Q96HY6	Q96HY6	DDRGK1	DDRGK domain-containing protein 1	42123.7
MSLN_HUMAN	Q13421	Q13421	MSLN	Mesothelin	42107.3
NDUS5_HUMAN	O43920	O43920	NDUFS5	NADH dehydrogenase [ubiquinone] iron-sulfur protein 5	42087.3
NDUAA_HUMAN	O95299	O95299	NDUFA10	NADH dehydrogenase [ubiquinone] 1 alpha subcomplex subunit 10, mitochondrial	42078.7
MIC26_HUMAN	Q9BUR5	Q9BUR5	APOO	MICOS complex subunit MIC26	42053.1
RAB5B_HUMAN	P61020	P61020	RAB5B	Ras-related protein Rab-5B	42044.3
CYH2_HUMAN	Q99418	Q99418	CYTH2	Cytohesin-2	42034.1
RRP1_HUMAN	P56182	P56182	RRP1	Ribosomal RNA processing protein 1 homolog A	42024.2
ACL6A_HUMAN	O96019	O96019	ACTL6A	Actin-like protein 6A	41988.6
HKDC1_HUMAN	Q2TB90	Q2TB90	HKDC1	Hexokinase HKDC1	41980.3
DNPH1_HUMAN	O43598	O43598	DNPH1	2'-deoxynucleoside 5'-phosphate N-hydrolase 1	41950.5
LARP1_HUMAN	Q6PKG0	Q6PKG0	LARP1	La-related protein 1	41892.1
RM38_HUMAN	Q96DV4	Q96DV4	MRPL38	Large ribosomal subunit protein mL38	41842.2
UGPA_HUMAN	Q16851	Q16851	UGP2	UTP--glucose-1-phosphate uridylyltransferase	41816.5
BOLA2_HUMAN	Q9H3K6	Q9H3K6	BOLA2B	BolA-like protein 2	41775
DESM_HUMAN	P17661	P17661	DES	Desmin	41752.2
IPO7_HUMAN	O95373	O95373	IPO7	Importin-7	41653.2
SYNM_HUMAN	Q96I59	Q96I59	NARS2	Probable asparagine--tRNA ligase, mitochondrial	41625.1
DCTN3_HUMAN	O75935	O75935	DCTN3	Dynactin subunit 3	41519.5
ARM10_HUMAN	Q8N2F6	Q8N2F6	ARMC10	Armadillo repeat-containing protein 10	41514.9
NSUN2_HUMAN	Q08J23	Q08J23	NSUN2	RNA cytosine C(5)-methyltransferase NSUN2	41496
RTRAF_HUMAN	Q9Y224	Q9Y224	RTRAF	RNA transcription, translation and transport factor protein	41486.8
PUR8_HUMAN	P30566	P30566	ADSL	Adenylosuccinate lyase	41462
HEXB_HUMAN	P07686	P07686	HEXB	Beta-hexosaminidase subunit beta	41398
DLG1_HUMAN	Q12959	Q12959	DLG1	Disks large homolog 1	41352.2
LTOR1_HUMAN	Q6IAA8	Q6IAA8	LAMTOR1	Ragulator complex protein LAMTOR1	41349.6
RSU1_HUMAN	Q15404	Q15404	RSU1	Ras suppressor protein 1	41323.8
AIMP2_HUMAN	Q13155	Q13155	AIMP2	Aminoacyl tRNA synthase complex-interacting multifunctional protein 2	41302.4
SMAD2_HUMAN	Q15796	Q15796	SMAD2	Mothers against decapentaplegic homolog 2	41273.2
CING_HUMAN	Q9P2M7	Q9P2M7	CGN	Cingulin	41271.8
PFKAP_HUMAN	Q01813	Q01813	PFKP	ATP-dependent 6-phosphofructokinase, platelet type	41235.7
ACINU_HUMAN	Q9UKV3	Q9UKV3	ACIN1	Apoptotic chromatin condensation inducer in the nucleus	41173.6
EIF1_HUMAN	O60739;P41567	P41567	EIF1	Eukaryotic translation initiation factor 1	41051.2
RAVR1_HUMAN	Q8IY67	Q8IY67	RAVER1	Ribonucleoprotein PTB-binding 1	41019.5
VASP_HUMAN	P50552	P50552	VASP	Vasodilator-stimulated phosphoprotein	40998.8
MK15_HUMAN	Q8TD08	Q8TD08	MAPK15	Mitogen-activated protein kinase 15	40995.7
BDH_HUMAN	Q02338	Q02338	BDH1	D-beta-hydroxybutyrate dehydrogenase, mitochondrial	40914.2
LAMA5_HUMAN	O15230	O15230	LAMA5	Laminin subunit alpha-5	40900.4
PLRKT_HUMAN	Q9HBL7	Q9HBL7	PLGRKT	Plasminogen receptor (KT)	40839.3
RPAB1_HUMAN	P19388	P19388	POLR2E	DNA-directed RNA polymerases I, II, and III subunit RPABC1	40808.5
OPA1_HUMAN	O60313	O60313	OPA1	Dynamin-like 120 kDa protein, mitochondrial	40758.1
NAKD2_HUMAN	Q4G0N4	Q4G0N4	NADK2	NAD kinase 2, mitochondrial	40757.1
RS23_HUMAN	P62266	P62266	RPS23	Small ribosomal subunit protein uS12	40752.9
EIF3H_HUMAN	O15372	O15372	EIF3H	Eukaryotic translation initiation factor 3 subunit H	40716.3
RDH14_HUMAN	Q9HBH5	Q9HBH5	RDH14	Retinol dehydrogenase 14	40667.1
TIM8A_HUMAN	O60220	O60220	TIMM8A	Mitochondrial import inner membrane translocase subunit Tim8 A	40611.5
DRA_HUMAN	P01903;P01906	P01903	HLA-DRA	HLA class II histocompatibility antigen, DR alpha chain	40550.9
NENF_HUMAN	Q9UMX5	Q9UMX5	NENF	Neudesin	40413.5
MYO6_HUMAN	Q9UM54	Q9UM54	MYO6	Unconventional myosin-VI	40406.5
LETM1_HUMAN	O95202	O95202	LETM1	Mitochondrial proton/calcium exchanger protein	40405.4
CUL4A_HUMAN	Q13619	Q13619	CUL4A	Cullin-4A	40381.6
SYTM_HUMAN	Q9BW92	Q9BW92	TARS2	Threonine--tRNA ligase, mitochondrial	40357.4
RPAC1_HUMAN	O15160	O15160	POLR1C	DNA-directed RNA polymerases I and III subunit RPAC1	40331.3
ARF6_HUMAN	P62330	P62330	ARF6	ADP-ribosylation factor 6	40327.2
SSRG_HUMAN	Q9UNL2	Q9UNL2	SSR3	Translocon-associated protein subunit gamma	40240.2
KAD1_HUMAN	P00568	P00568	AK1	Adenylate kinase isoenzyme 1	40203.1
CDN1B_HUMAN	P46527	P46527	CDKN1B	Cyclin-dependent kinase inhibitor 1B	40201.4
RS17_HUMAN	P08708	P08708	RPS17	Small ribosomal subunit protein eS17	40198.5
CAPR1_HUMAN	Q14444	Q14444	CAPRIN1	Caprin-1	40185.1
SFXN2_HUMAN	Q96NB2	Q96NB2	SFXN2	Sideroflexin-2	40122
OGFR_HUMAN	Q9NZT2	Q9NZT2	OGFR	Opioid growth factor receptor	40104.8
HSP72_HUMAN	P54652	P54652	HSPA2	Heat shock-related 70 kDa protein 2	40078.1
PELP1_HUMAN	Q8IZL8	Q8IZL8	PELP1	Proline-, glutamic acid- and leucine-rich protein 1	40062.9
TPD53_HUMAN	Q16890	Q16890	TPD52L1	Tumor protein D53	40046.7
MIRO2_HUMAN	Q8IXI1	Q8IXI1	RHOT2	Mitochondrial Rho GTPase 2	40038
UMPS_HUMAN	P11172	P11172	UMPS	Uridine 5'-monophosphate synthase	40036.8
PPIH_HUMAN	O43447	O43447	PPIH	Peptidyl-prolyl cis-trans isomerase H	39983.4
RL21_HUMAN	P46778	P46778	RPL21	Large ribosomal subunit protein eL21	39975.5
TRAF1_HUMAN	Q13077	Q13077	TRAF1	TNF receptor-associated factor 1	39963.9
TFCP2_HUMAN	Q12800;Q9NZI6	Q12800	TFCP2	Alpha-globin transcription factor CP2	39946.1
MSH6_HUMAN	P52701	P52701	MSH6	DNA mismatch repair protein Msh6	39943.6
TECR_HUMAN	Q9NZ01	Q9NZ01	TECR	Very-long-chain enoyl-CoA reductase	39926.5
SNRPA_HUMAN	P09012	P09012	SNRPA	U1 small nuclear ribonucleoprotein A	39914.7
NU107_HUMAN	P57740	P57740	NUP107	Nuclear pore complex protein Nup107	39889.4
RT23_HUMAN	Q9Y3D9	Q9Y3D9	MRPS23	Small ribosomal subunit protein mS23	39869.3
SIPA1_HUMAN	Q96FS4	Q96FS4	SIPA1	Signal-induced proliferation-associated protein 1	39746.9
PLIN3_HUMAN	O60664	O60664	PLIN3	Perilipin-3	39731.9
CDV3_HUMAN	Q9UKY7	Q9UKY7	CDV3	Protein CDV3 homolog	39683.1
LRBA_HUMAN	P50851	P50851	LRBA	Lipopolysaccharide-responsive and beige-like anchor protein	39662.3
SGMR2_HUMAN	Q5BJF2	Q5BJF2	TMEM97	Sigma intracellular receptor 2	39659
TMCO1_HUMAN	Q9UM00	Q9UM00	TMCO1	Calcium load-activated calcium channel	39656.4
GNAS1_HUMAN	Q5JWF2	Q5JWF2	GNAS	Guanine nucleotide-binding protein G(s) subunit alpha isoforms XLas	39644.2
DHRS7_HUMAN	Q9Y394	Q9Y394	DHRS7	Dehydrogenase/reductase SDR family member 7	39635.5
OCAD1_HUMAN	Q9NX40	Q9NX40	OCIAD1	OCIA domain-containing protein 1	39616.7
THTM_HUMAN	P25325	P25325	MPST	3-mercaptopyruvate sulfurtransferase	39586.4
SNX5_HUMAN	Q9Y5X3	Q9Y5X3	SNX5	Sorting nexin-5	39580.4
HGS_HUMAN	O14964	O14964	HGS	Hepatocyte growth factor-regulated tyrosine kinase substrate	39541.9
IF2P_HUMAN	O60841	O60841	EIF5B	Eukaryotic translation initiation factor 5B	39483.8
PESC_HUMAN	O00541	O00541	PES1	Pescadillo homolog	39459.8
NELFE_HUMAN	P18615	P18615	NELFE	Negative elongation factor E	39430.6
ZCCHV_HUMAN	Q7Z2W4	Q7Z2W4	ZC3HAV1	Zinc finger CCCH-type antiviral protein 1	39269.7
NU155_HUMAN	O75694	O75694	NUP155	Nuclear pore complex protein Nup155	39158.7
NUP88_HUMAN	Q99567	Q99567	NUP88	Nuclear pore complex protein Nup88	39031.3
IGHG4_HUMAN	P01861	P01861	IGHG4	Immunoglobulin heavy constant gamma 4	39030.5
HRG_HUMAN	P04196	P04196	HRG	Histidine-rich glycoprotein	38944.5
DUS23_HUMAN	Q9BVJ7	Q9BVJ7	DUSP23	Dual specificity protein phosphatase 23	38933.9
BPNT1_HUMAN	O95861	O95861	BPNT1	3'(2'),5'-bisphosphate nucleotidase 1	38917.5
PTCD3_HUMAN	Q96EY7	Q96EY7	PTCD3	Small ribosomal subunit protein mS39	38903.3
ITA3_HUMAN	P26006	P26006	ITGA3	Integrin alpha-3	38870
LIS1_HUMAN	P43034	P43034	PAFAH1B1	Platelet-activating factor acetylhydrolase IB subunit beta	38864.8
ERAP1_HUMAN	Q9NZ08	Q9NZ08	ERAP1	Endoplasmic reticulum aminopeptidase 1	38863.2
QCR7_HUMAN	P14927	P14927	UQCRB	Cytochrome b-c1 complex subunit 7	38812.6
THIC_HUMAN	Q9BWD1	Q9BWD1	ACAT2	Acetyl-CoA acetyltransferase, cytosolic	38797.2
CO4A2_HUMAN	P08572	P08572	COL4A2	Collagen alpha-2(IV) chain	38770.3
RALA_HUMAN	P11233	P11233	RALA	Ras-related protein Ral-A	38747.1
RAE1L_HUMAN	P78406	P78406	RAE1	mRNA export factor RAE1	38711.1
TOP1_HUMAN	P11387	P11387	TOP1	DNA topoisomerase 1	38710.6
FOXK1_HUMAN	P85037	P85037	FOXK1	Forkhead box protein K1	38705.8
SMRD2_HUMAN	Q92925	Q92925	SMARCD2	SWI/SNF-related matrix-associated actin-dependent regulator of chromatin subfamily D member 2	38695.6
SNX27_HUMAN	Q96L92	Q96L92	SNX27	Sorting nexin-27	38679.2
APOA4_HUMAN	P06727	P06727	APOA4	Apolipoprotein A-IV	38666.4
GDIR2_HUMAN	P52566	P52566	ARHGDIB	Rho GDP-dissociation inhibitor 2	38653.9
GOGA3_HUMAN	Q08378	Q08378	GOLGA3	Golgin subfamily A member 3	38560.7
MCU_HUMAN	Q8NE86	Q8NE86	MCU	Calcium uniporter protein, mitochondrial	38559.1
RT34_HUMAN	P82930	P82930	MRPS34	Small ribosomal subunit protein mS34	38555.2
CARM1_HUMAN	Q86X55	Q86X55	CARM1	Histone-arginine methyltransferase CARM1	38524.8
EXOS4_HUMAN	Q9NPD3	Q9NPD3	EXOSC4	Exosome complex component RRP41	38515.6
COPE_HUMAN	O14579	O14579	COPE	Coatomer subunit epsilon	38506.2
Z324A_HUMAN	Q6AW86;O75467	O75467	ZNF324	Zinc finger protein 324A	38490.2
ERMP1_HUMAN	Q7Z2K6	Q7Z2K6	ERMP1	Endoplasmic reticulum metallopeptidase 1	38481.6
AHSA1_HUMAN	O95433	O95433	AHSA1	Activator of 90 kDa heat shock protein ATPase homolog 1	38427.1
BAP18_HUMAN	Q8IXM2	Q8IXM2	BAP18	Chromatin complexes subunit BAP18	38399.9
VPS29_HUMAN	Q9UBQ0	Q9UBQ0	VPS29	Vacuolar protein sorting-associated protein 29	38376.1
G6PE_HUMAN	O95479	O95479	H6PD	GDH/6PGL endoplasmic bifunctional protein	38373.9
CDC73_HUMAN	Q6P1J9	Q6P1J9	CDC73	Parafibromin	38337.3
SRC_HUMAN	P12931;P07947;P06241	P12931	SRC	Proto-oncogene tyrosine-protein kinase Src	38193
KAT3_HUMAN	Q6YP21	Q6YP21	KYAT3	Kynurenine--oxoglutarate transaminase 3	38185.6
PPOX_HUMAN	P50336	P50336	PPOX	Protoporphyrinogen oxidase	38182.8
EFHD2_HUMAN	Q96C19	Q96C19	EFHD2	EF-hand domain-containing protein D2	38179
RRS1_HUMAN	Q15050	Q15050	RRS1	Ribosome biogenesis regulatory protein homolog	38175.8
TUT4_HUMAN	Q5TAX3	Q5TAX3	TUT4	Terminal uridylyltransferase 4	38167.3
ATP5J_HUMAN	P18859	P18859	ATP5PF	ATP synthase-coupling factor 6, mitochondrial	38159.5
STRAP_HUMAN	Q9Y3F4	Q9Y3F4	STRAP	Serine-threonine kinase receptor-associated protein	38139
MRT4_HUMAN	Q9UKD2	Q9UKD2	MRTO4	mRNA turnover protein 4 homolog	38087.1
LYPA2_HUMAN	O95372	O95372	LYPLA2	Acyl-protein thioesterase 2	38085.8
GMFB_HUMAN	P60983	P60983	GMFB	Glia maturation factor beta	38078.6
HEAT1_HUMAN	Q9H583	Q9H583	HEATR1	HEAT repeat-containing protein 1	38077.6
KLC4_HUMAN	Q9NSK0	Q9NSK0	KLC4	Kinesin light chain 4	38058.4
CYBP_HUMAN	Q9HB71	Q9HB71	CACYBP	Calcyclin-binding protein	38044.8
ACOT9_HUMAN	Q9Y305	Q9Y305	ACOT9	Acyl-coenzyme A thioesterase 9, mitochondrial	37988.8
PRP31_HUMAN	Q8WWY3	Q8WWY3	PRPF31	U4/U6 small nuclear ribonucleoprotein Prp31	37985
BCLF1_HUMAN	Q9NYF8	Q9NYF8	BCLAF1	Bcl-2-associated transcription factor 1	37952.8
FLOT2_HUMAN	Q14254	Q14254	FLOT2	Flotillin-2	37930.3
ES8L1_HUMAN	Q8TE68	Q8TE68	EPS8L1	Epidermal growth factor receptor kinase substrate 8-like protein 1	37921.5
TMED1_HUMAN	Q13445	Q13445	TMED1	Transmembrane emp24 domain-containing protein 1	37890.1
SNR40_HUMAN	Q96DI7	Q96DI7	SNRNP40	U5 small nuclear ribonucleoprotein 40 kDa protein	37885.7
PUS7_HUMAN	Q96PZ0	Q96PZ0	PUS7	Pseudouridylate synthase 7 homolog	37872.7
CADM1_HUMAN	Q9BY67	Q9BY67	CADM1	Cell adhesion molecule 1	37819.6
GNA11_HUMAN	P29992	P29992	GNA11	Guanine nucleotide-binding protein subunit alpha-11	37819
PPIE_HUMAN	Q9UNP9	Q9UNP9	PPIE	Peptidyl-prolyl cis-trans isomerase E	37804.5
KAPCA_HUMAN	P22694;P17612	P17612	PRKACA	cAMP-dependent protein kinase catalytic subunit alpha	37789.9
PRS10_HUMAN	P62333	P62333	PSMC6	26S proteasome regulatory subunit 10B	37744
OPLA_HUMAN	O14841	O14841	OPLAH	5-oxoprolinase	37710.4
P5CR3_HUMAN	Q53H96	Q53H96	PYCR3	Pyrroline-5-carboxylate reductase 3	37665.9
ZN512_HUMAN	Q96ME7	Q96ME7	ZNF512	Zinc finger protein 512	37658.7
APOL4_HUMAN	Q9BPW4	Q9BPW4	APOL4	Apolipoprotein L4	37631.3
VTA1_HUMAN	Q9NP79	Q9NP79	VTA1	Vacuolar protein sorting-associated protein VTA1 homolog	37621.9
TNPO3_HUMAN	Q9Y5L0	Q9Y5L0	TNPO3	Transportin-3	37600
DC1I2_HUMAN	Q13409	Q13409	DYNC1I2	Cytoplasmic dynein 1 intermediate chain 2	37561.7
ARF5_HUMAN	P84085	P84085	ARF5	ADP-ribosylation factor 5	37493.7
PEPD_HUMAN	P12955	P12955	PEPD	Xaa-Pro dipeptidase	37407.1
NDK3_HUMAN	Q13232	Q13232	NME3	Nucleoside diphosphate kinase 3	37400.1
ITIH2_HUMAN	P19823	P19823	ITIH2	Inter-alpha-trypsin inhibitor heavy chain H2	37390.5
GRPE1_HUMAN	Q9HAV7	Q9HAV7	GRPEL1	GrpE protein homolog 1, mitochondrial	37378.7
ARL2_HUMAN	P36404	P36404	ARL2	ADP-ribosylation factor-like protein 2	37329.7
CAF17_HUMAN	Q5T440	Q5T440	IBA57	Putative transferase CAF17, mitochondrial	37298.6
SF3A3_HUMAN	Q12874	Q12874	SF3A3	Splicing factor 3A subunit 3	37291.6
FEN1_HUMAN	P39748	P39748	FEN1	Flap endonuclease 1	37258.9
TPPC9_HUMAN	Q96Q05	Q96Q05	TRAPPC9	Trafficking protein particle complex subunit 9	37222.4
MCM4_HUMAN	P33991	P33991	MCM4	DNA replication licensing factor MCM4	37171.1
LSM4_HUMAN	Q9Y4Z0	Q9Y4Z0	LSM4	U6 snRNA-associated Sm-like protein LSm4	37160.3
E2AK2_HUMAN	P19525	P19525	EIF2AK2	Interferon-induced, double-stranded RNA-activated protein kinase	37148.2
TBL3_HUMAN	Q12788	Q12788	TBL3	Transducin beta-like protein 3	37134.8
DDX18_HUMAN	Q9NVP1	Q9NVP1	DDX18	ATP-dependent RNA helicase DDX18	37052.6
TNC18_HUMAN	O15417	O15417	TNRC18	Trinucleotide repeat-containing gene 18 protein	37045.3
ASPH_HUMAN	Q12797	Q12797	ASPH	Aspartyl/asparaginyl beta-hydroxylase	37043.2
F120A_HUMAN	Q9NZB2	Q9NZB2	FAM120A	Constitutive coactivator of PPAR-gamma-like protein 1	37032
AOXA_HUMAN	Q06278	Q06278	AOX1	Aldehyde oxidase	37030
COTL1_HUMAN	Q14019	Q14019	COTL1	Coactosin-like protein	36907.1
DDX47_HUMAN	Q9H0S4	Q9H0S4	DDX47	Probable ATP-dependent RNA helicase DDX47	36860.4
HMGB2_HUMAN	P26583	P26583	HMGB2	High mobility group protein B2	36855.8
BGLR_HUMAN	P08236	P08236	GUSB	Beta-glucuronidase	36805.6
PIN4_HUMAN	Q9Y237	Q9Y237	PIN4	Peptidyl-prolyl cis-trans isomerase NIMA-interacting 4	36799.6
OGA_HUMAN	O60502	O60502	OGA	Protein O-GlcNAcase	36778.8
RFC5_HUMAN	P40937	P40937	RFC5	Replication factor C subunit 5	36776.1
TRXR2_HUMAN	Q9NNW7	Q9NNW7	TXNRD2	Thioredoxin reductase 2, mitochondrial	36762.6
HCFC1_HUMAN	P51610	P51610	HCFC1	Host cell factor 1	36756.5
PSB5_HUMAN	P28074	P28074	PSMB5	Proteasome subunit beta type-5	36724.8
PCNP_HUMAN	Q8WW12	Q8WW12	PCNP	PEST proteolytic signal-containing nuclear protein	36692.1
SCAM3_HUMAN	O14828	O14828	SCAMP3	Secretory carrier-associated membrane protein 3	36686.3
RBM15_HUMAN	Q96T37	Q96T37	RBM15	RNA-binding protein 15	36681.7
5NTC_HUMAN	P49902	P49902	NT5C2	Cytosolic purine 5'-nucleotidase	36679.6
IBP7_HUMAN	Q16270	Q16270	IGFBP7	Insulin-like growth factor-binding protein 7	36678.6
IPO9_HUMAN	Q96P70	Q96P70	IPO9	Importin-9	36639.4
NNMT_HUMAN	P40261	P40261	NNMT	Nicotinamide N-methyltransferase	36606.6
NPT2B_HUMAN	O95436	O95436	SLC34A2	Sodium-dependent phosphate transport protein 2B	36499.8
HSP7E_HUMAN	Q0VDF9	Q0VDF9	HSPA14	Heat shock 70 kDa protein 14	36494.8
IST1_HUMAN	P53990	P53990	IST1	IST1 homolog	36465.8
MA7D1_HUMAN	Q3KQU3	Q3KQU3	MAP7D1	MAP7 domain-containing protein 1	36389.9
DBNL_HUMAN	Q9UJU6	Q9UJU6	DBNL	Drebrin-like protein	36300.8
OXLA_HUMAN	Q96RQ9	Q96RQ9	IL4I1	L-amino-acid oxidase	36265
RAB21_HUMAN	Q9UL25	Q9UL25	RAB21	Ras-related protein Rab-21	36250.5
AL5AP_HUMAN	P20292	P20292	ALOX5AP	Arachidonate 5-lipoxygenase-activating protein	36207.7
EBP2_HUMAN	Q99848	Q99848	EBNA1BP2	Probable rRNA-processing protein EBP2	36199.9
NU205_HUMAN	Q92621	Q92621	NUP205	Nuclear pore complex protein Nup205	36178.4
ERO1A_HUMAN	Q96HE7	Q96HE7	ERO1A	ERO1-like protein alpha	36175.5
PTMS_HUMAN	P20962	P20962	PTMS	Parathymosin	36149
HS71L_HUMAN	P34931	P34931	HSPA1L	Heat shock 70 kDa protein 1-like	36100.1
PURA_HUMAN	Q00577	Q00577	PURA	Transcriptional activator protein Pur-alpha	36082.7
DEOC_HUMAN	Q9Y315	Q9Y315	DERA	Deoxyribose-phosphate aldolase	36060
RPAC2_HUMAN	P0DPB6	P0DPB6	POLR1D	DNA-directed RNA polymerases I and III subunit RPAC2	36030.7
BRX1_HUMAN	Q8TDN6	Q8TDN6	BRIX1	Ribosome biogenesis protein BRX1 homolog	35984
EPCAM_HUMAN	P16422	P16422	EPCAM	Epithelial cell adhesion molecule	35945.7
IMPA1_HUMAN	P29218	P29218	IMPA1	Inositol monophosphatase 1	35945.5
NEUA_HUMAN	Q8NFW8	Q8NFW8	CMAS	N-acylneuraminate cytidylyltransferase	35888.5
RAB18_HUMAN	Q9NP72	Q9NP72	RAB18	Ras-related protein Rab-18	35864.8
COA3_HUMAN	Q9Y2R0	Q9Y2R0	COA3	Cytochrome c oxidase assembly factor 3 homolog, mitochondrial	35864.4
MCM2_HUMAN	P49736	P49736	MCM2	DNA replication licensing factor MCM2	35862.3
RPB2_HUMAN	P30876	P30876	POLR2B	DNA-directed RNA polymerase II subunit RPB2	35848.2
CERU_HUMAN	P00450	P00450	CP	Ceruloplasmin	35825.9
COASY_HUMAN	Q13057	Q13057	COASY	Bifunctional coenzyme A synthase	35811.7
YES_HUMAN	P07947	P07947	YES1	Tyrosine-protein kinase Yes	35791.9
BROX_HUMAN	Q5VW32	Q5VW32	BROX	BRO1 domain-containing protein BROX	35770
VMA5A_HUMAN	O00534	O00534	VWA5A	von Willebrand factor A domain-containing protein 5A	35726.4
T126A_HUMAN	Q9H061	Q9H061	TMEM126A	Transmembrane protein 126A	35695.3
TEX10_HUMAN	Q9NXF1	Q9NXF1	TEX10	Testis-expressed protein 10	35690.3
CSDE1_HUMAN	O75534	O75534	CSDE1	Cold shock domain-containing protein E1	35678.2
RBM4_HUMAN	Q9BWF3	Q9BWF3	RBM4	RNA-binding protein 4	35675.2
CRNL1_HUMAN	Q9BZJ0	Q9BZJ0	CRNKL1	Crooked neck-like protein 1	35663.9
ODPX_HUMAN	O00330	O00330	PDHX	Pyruvate dehydrogenase protein X component, mitochondrial	35654.3
COQ8A_HUMAN	Q8NI60	Q8NI60	COQ8A	Atypical kinase COQ8A, mitochondrial	35640.8
S23IP_HUMAN	Q9Y6Y8	Q9Y6Y8	SEC23IP	SEC23-interacting protein	35618.7
NDUBB_HUMAN	Q9NX14	Q9NX14	NDUFB11	NADH dehydrogenase [ubiquinone] 1 beta subcomplex subunit 11, mitochondrial	35602.8
AS3MT_HUMAN	Q9HBK9	Q9HBK9	AS3MT	Arsenite methyltransferase	35575.5
SSH3_HUMAN	Q8TE77	Q8TE77	SSH3	Protein phosphatase Slingshot homolog 3	35561.9
CFAB_HUMAN	P00751	P00751	CFB	Complement factor B	35542.1
PSB9_HUMAN	P28065	P28065	PSMB9	Proteasome subunit beta type-9	35498.8
IF4G2_HUMAN	P78344	P78344	EIF4G2	Eukaryotic translation initiation factor 4 gamma 2	35452.2
EHD4_HUMAN	Q9NZN3;Q9H223	Q9H223	EHD4	EH domain-containing protein 4	35421.6
RBM43_HUMAN	Q6ZSC3	Q6ZSC3	RBM43	RNA-binding protein 43	35407.9
LC7L3_HUMAN	O95232	O95232	LUC7L3	Luc7-like protein 3	35370
DNS2A_HUMAN	O00115	O00115	DNASE2	Deoxyribonuclease-2-alpha	35315
ISOC2_HUMAN	Q96AB3	Q96AB3	ISOC2	Isochorismatase domain-containing protein 2	35283.1
SC16A_HUMAN	O15027	O15027	SEC16A	Protein transport protein Sec16A	35281.7
MBOA7_HUMAN	Q96N66	Q96N66	MBOAT7	Lysophospholipid acyltransferase 7	35237
RBM25_HUMAN	P49756	P49756	RBM25	RNA-binding protein 25	35225.8
PCP4_HUMAN	P48539	P48539	PCP4	Calmodulin regulator protein PCP4	35174.3
LCLT1_HUMAN	Q6UWP7	Q6UWP7	LCLAT1	Lysocardiolipin acyltransferase 1	35154.2
MPPA_HUMAN	Q10713	Q10713	PMPCA	Mitochondrial-processing peptidase subunit alpha	35074.4
BST2_HUMAN	Q10589	Q10589	BST2	Bone marrow stromal antigen 2	35044.2
UFM1_HUMAN	P61960	P61960	UFM1	Ubiquitin-fold modifier 1	35025.7
SAE1_HUMAN	Q9UBE0	Q9UBE0	SAE1	SUMO-activating enzyme subunit 1	35022.5
EDF1_HUMAN	O60869	O60869	EDF1	Endothelial differentiation-related factor 1	35017.2
KPLCE_HUMAN	Q5T750	Q5T750	KPLCE	Protein KPLCE	35013.1
AL3A2_HUMAN	P51648	P51648	ALDH3A2	Aldehyde dehydrogenase family 3 member A2	35007.9
PAX8_HUMAN	Q06710	Q06710	PAX8	Paired box protein Pax-8	34985.1
T2FB_HUMAN	P13984	P13984	GTF2F2	General transcription factor IIF subunit 2	34969.2
RBP2_HUMAN	P49792	P49792	RANBP2	E3 SUMO-protein ligase RanBP2	34963.1
TIM44_HUMAN	O43615	O43615	TIMM44	Mitochondrial import inner membrane translocase subunit TIM44	34934.4
BRE1A_HUMAN	Q5VTR2	Q5VTR2	RNF20	E3 ubiquitin-protein ligase BRE1A	34830.6
FPRP_HUMAN	Q9P2B2	Q9P2B2	PTGFRN	Prostaglandin F2 receptor negative regulator	34827.7
DHCR7_HUMAN	Q9UBM7	Q9UBM7	DHCR7	7-dehydrocholesterol reductase	34808
PPID_HUMAN	Q08752	Q08752	PPID	Peptidyl-prolyl cis-trans isomerase D	34707
CSN6_HUMAN	Q7L5N1	Q7L5N1	COPS6	COP9 signalosome complex subunit 6	34705.7
STAT3_HUMAN	P40763	P40763	STAT3	Signal transducer and activator of transcription 3	34689.5
ARL8B_HUMAN	Q9NVJ2;Q96BM9	Q9NVJ2	ARL8B	ADP-ribosylation factor-like protein 8B	34666
SMCE1_HUMAN	Q969G3	Q969G3	SMARCE1	SWI/SNF-related matrix-associated actin-dependent regulator of chromatin subfamily E member 1	34652.2
AQR_HUMAN	O60306	O60306	AQR	RNA helicase aquarius	34618.2
TR112_HUMAN	Q9UI30	Q9UI30	TRMT112	Multifunctional methyltransferase subunit TRM112-like protein	34606.5
ASAH1_HUMAN	Q13510	Q13510	ASAH1	Acid ceramidase	34600.5
PLAP_HUMAN	Q9Y263	Q9Y263	PLAA	Phospholipase A-2-activating protein	34579.5
RABL3_HUMAN	Q5HYI8	Q5HYI8	RABL3	Rab-like protein 3	34570.9
RAB5A_HUMAN	P20339	P20339	RAB5A	Ras-related protein Rab-5A	34541.8
AGFG1_HUMAN	P52594	P52594	AGFG1	Arf-GAP domain and FG repeat-containing protein 1	34529.8
SNW1_HUMAN	Q13573	Q13573	SNW1	SNW domain-containing protein 1	34523.6
RAP1B_HUMAN	P61224;A6NIZ1	P61224	RAP1B	Ras-related protein Rap-1b	34479
ADPRS_HUMAN	Q9NX46	Q9NX46	ADPRS	ADP-ribosylhydrolase ARH3	34461
MMTA2_HUMAN	Q9BU76	Q9BU76	MMTAG2	Multiple myeloma tumor-associated protein 2	34435.8
SLFN5_HUMAN	Q08AF3	Q08AF3	SLFN5	Schlafen family member 5	34421.6
PUS1_HUMAN	Q9Y606	Q9Y606	PUS1	Pseudouridylate synthase 1 homolog	34419.9
EPN4_HUMAN	Q14677	Q14677	CLINT1	Clathrin interactor 1	34375.9
SNX12_HUMAN	Q9UMY4	Q9UMY4	SNX12	Sorting nexin-12	34375.8
DNJA3_HUMAN	Q96EY1	Q96EY1	DNAJA3	DnaJ homolog subfamily A member 3, mitochondrial	34329.8
PLXB2_HUMAN	O15031	O15031	PLXNB2	Plexin-B2	34320.4
PSD12_HUMAN	O00232	O00232	PSMD12	26S proteasome non-ATPase regulatory subunit 12	34289.2
NUBP1_HUMAN	P53384	P53384	NUBP1	Cytosolic Fe-S cluster assembly factor NUBP1	34216
GALK1_HUMAN	P51570	P51570	GALK1	Galactokinase	34189.5
NECT2_HUMAN	Q92692	Q92692	NECTIN2	Nectin-2	34126.4
PLPHP_HUMAN	O94903	O94903	PLPBP	Pyridoxal phosphate homeostasis protein	34108.3
CZIB_HUMAN	Q9NWV4	Q9NWV4	CZIB	CXXC motif containing zinc binding protein	34084.5
PCCA_HUMAN	P05165	P05165	PCCA	Propionyl-CoA carboxylase alpha chain, mitochondrial	34036.5
RM18_HUMAN	Q9H0U6	Q9H0U6	MRPL18	Large ribosomal subunit protein uL18m	34035.6
DYN3_HUMAN	Q9UQ16	Q9UQ16	DNM3	Dynamin-3	34027.9
PIN1_HUMAN	Q13526	Q13526	PIN1	Peptidyl-prolyl cis-trans isomerase NIMA-interacting 1	34007.7
HEBP2_HUMAN	Q9Y5Z4	Q9Y5Z4	HEBP2	Heme-binding protein 2	33997.3
A0A075B7B8_HUMAN	A0A075B7B8	A0A075B7B8	IGHV3OR16-12	Immunoglobulin heavy variable 3/OR16-12 (non-functional) (Fragment)	33971.6
IMA1_HUMAN	P52292	P52292	KPNA2	Importin subunit alpha-1	33917
DCUP_HUMAN	P06132	P06132	UROD	Uroporphyrinogen decarboxylase	33905.6
ICAL_HUMAN	P20810	P20810	CAST	Calpastatin	33862.6
MIER1_HUMAN	Q8N108	Q8N108	MIER1	Mesoderm induction early response protein 1	33856.3
ZN185_HUMAN	O15231	O15231	ZNF185	Zinc finger protein 185	33852.4
CO4A1_HUMAN	P02462;P29400	P02462	COL4A1	Collagen alpha-1(IV) chain	33836.3
IF16_HUMAN	Q16666	Q16666	IFI16	Gamma-interferon-inducible protein 16	33834.4
PEA15_HUMAN	Q15121	Q15121	PEA15	Astrocytic phosphoprotein PEA-15	33826.5
HLAC_HUMAN	P10321	P10321	HLA-C	HLA class I histocompatibility antigen, C alpha chain	33815
CK5P3_HUMAN	Q96JB5	Q96JB5	CDK5RAP3	CDK5 regulatory subunit-associated protein 3	33808.3
QKI_HUMAN	Q96PU8	Q96PU8	QKI	KH domain-containing RNA-binding protein QKI	33802.6
TFP11_HUMAN	Q9UBB9	Q9UBB9	TFIP11	Tuftelin-interacting protein 11	33796.3
MA2A1_HUMAN	Q16706	Q16706	MAN2A1	Alpha-mannosidase 2	33764.8
RBM10_HUMAN	P52756;P98175	P98175	RBM10	RNA-binding protein 10	33762.4
RS12_HUMAN	P25398	P25398	RPS12	Small ribosomal subunit protein eS12	33710.6
GNA13_HUMAN	Q14344	Q14344	GNA13	Guanine nucleotide-binding protein subunit alpha-13	33701.6
PRUN1_HUMAN	Q86TP1	Q86TP1	PRUNE1	Exopolyphosphatase PRUNE1	33700.7
XRCC1_HUMAN	P18887	P18887	XRCC1	DNA repair protein XRCC1	33678.6
SMRC1_HUMAN	Q92922	Q92922	SMARCC1	SWI/SNF complex subunit SMARCC1	33674.4
PCP_HUMAN	P42785	P42785	PRCP	Lysosomal Pro-X carboxypeptidase	33671.4
ERG24_HUMAN	O76062	O76062	TM7SF2	Delta(14)-sterol reductase TM7SF2	33622.5
NHP2_HUMAN	Q9NX24	Q9NX24	NHP2	H/ACA ribonucleoprotein complex subunit 2	33620.6
AK1D1_HUMAN	P51857	P51857	AKR1D1	Aldo-keto reductase family 1 member D1	33610
CHIP_HUMAN	Q9UNE7	Q9UNE7	STUB1	E3 ubiquitin-protein ligase CHIP	33591.7
CPSF1_HUMAN	Q10570	Q10570	CPSF1	Cleavage and polyadenylation specificity factor subunit 1	33591.4
PTPRF_HUMAN	P10586	P10586	PTPRF	Receptor-type tyrosine-protein phosphatase F	33569.8
IPO5_HUMAN	O00410	O00410	IPO5	Importin-5	33534.5
SMC3_HUMAN	Q9UQE7	Q9UQE7	SMC3	Structural maintenance of chromosomes protein 3	33526.8
UBP7_HUMAN	Q93009	Q93009	USP7	Ubiquitin carboxyl-terminal hydrolase 7	33523.6
LSM7_HUMAN	Q9UK45	Q9UK45	LSM7	U6 snRNA-associated Sm-like protein LSm7	33499
CLPP_HUMAN	Q16740	Q16740	CLPP	ATP-dependent Clp protease proteolytic subunit, mitochondrial	33484.4
APOE_HUMAN	P02649	P02649	APOE	Apolipoprotein E	33454
ASPG_HUMAN	P20933	P20933	AGA	N(4)-(beta-N-acetylglucosaminyl)-L-asparaginase	33439.6
PIGS_HUMAN	Q96S52	Q96S52	PIGS	GPI transamidase component PIG-S	33374.1
LNP_HUMAN	Q9C0E8	Q9C0E8	LNPK	Endoplasmic reticulum junction formation protein lunapark	33354.1
ACBP_HUMAN	P07108	P07108	DBI	Acyl-CoA-binding protein	33319.5
AAAS_HUMAN	Q9NRG9	Q9NRG9	AAAS	Aladin	33313.9
TMOD3_HUMAN	Q9NYL9	Q9NYL9	TMOD3	Tropomodulin-3	33306.3
DNJC8_HUMAN	O75937	O75937	DNAJC8	DnaJ homolog subfamily C member 8	33288.2
AGM1_HUMAN	O95394	O95394	PGM3	Phosphoacetylglucosamine mutase	33227
NDRG1_HUMAN	Q92597	Q92597	NDRG1	Protein NDRG1	33209.1
PAPS1_HUMAN	O43252	O43252	PAPSS1	Bifunctional 3'-phosphoadenosine 5'-phosphosulfate synthase 1	33183.2
WDR81_HUMAN	Q562E7	Q562E7	WDR81	WD repeat-containing protein 81	33143.5
SNF5_HUMAN	Q12824	Q12824	SMARCB1	SWI/SNF-related matrix-associated actin-dependent regulator of chromatin subfamily B member 1	33082.5
SF3B6_HUMAN	Q9Y3B4	Q9Y3B4	SF3B6	Splicing factor 3B subunit 6	33078.2
SYAM_HUMAN	Q5JTZ9	Q5JTZ9	AARS2	Alanine--tRNA ligase, mitochondrial	33067.1
4F2_HUMAN	P08195	P08195	SLC3A2	4F2 cell-surface antigen heavy chain	33030.7
ACTY_HUMAN	P42025	P42025	ACTR1B	Beta-centractin	33027.3
ENY2_HUMAN	Q9NPA8	Q9NPA8	ENY2	Transcription and mRNA export factor ENY2	33016.9
SRP68_HUMAN	Q9UHB9	Q9UHB9	SRP68	Signal recognition particle subunit SRP68	32995.3
CARF_HUMAN	Q9NXV6	Q9NXV6	CDKN2AIP	CDKN2A-interacting protein	32940.7
MFS10_HUMAN	Q14728	Q14728	MFSD10	Major facilitator superfamily domain-containing protein 10	32934.9
EDC4_HUMAN	Q6P2E9	Q6P2E9	EDC4	Enhancer of mRNA-decapping protein 4	32923.9
SH3G1_HUMAN	Q99961;Q99962	Q99961	SH3GL1	Endophilin-A2	32905.5
TRI25_HUMAN	Q14258	Q14258	TRIM25	E3 ubiquitin/ISG15 ligase TRIM25	32851.3
UN45A_HUMAN	Q9H3U1	Q9H3U1	UNC45A	Protein unc-45 homolog A	32821.5
GALE_HUMAN	Q14376	Q14376	GALE	UDP-glucose 4-epimerase	32772.1
BICRA_HUMAN	Q9NZM4	Q9NZM4	BICRA	BRD4-interacting chromatin-remodeling complex-associated protein	32745.9
RRP12_HUMAN	Q5JTH9	Q5JTH9	RRP12	RRP12-like protein	32729.9
SMAP1_HUMAN	Q8IYB5	Q8IYB5	SMAP1	Stromal membrane-associated protein 1	32724.8
CT452_HUMAN;CT458_HUMAN;CT459_HUMAN	P0DMU8;Q8NHU0;Q5HYN5;P0DMU9;P0DMV1;P0DMV2;P0DMU7;P0DMV0;Q5DJT8	P0DMV1;P0DMV2;Q5DJT8	CT45A2;CT45A8;CT45A9	Cancer/testis antigen family 45 member A8	32723.9
NMT1_HUMAN	P30419	P30419	NMT1	Glycylpeptide N-tetradecanoyltransferase 1	32706.3
NEP1_HUMAN	Q92979	Q92979	EMG1	Ribosomal RNA small subunit methyltransferase NEP1	32684.5
RM37_HUMAN	Q9BZE1	Q9BZE1	MRPL37	Large ribosomal subunit protein mL37	32677.9
GT251_HUMAN	Q8NBJ5	Q8NBJ5	COLGALT1	Procollagen galactosyltransferase 1	32631.8
MD1L1_HUMAN	Q9Y6D9	Q9Y6D9	MAD1L1	Mitotic spindle assembly checkpoint protein MAD1	32614.3
PRP4_HUMAN	O43172	O43172	PRPF4	U4/U6 small nuclear ribonucleoprotein Prp4	32593.4
ANK3_HUMAN	Q12955	Q12955	ANK3	Ankyrin-3	32584.7
RPB3_HUMAN	P19387	P19387	POLR2C	DNA-directed RNA polymerase II subunit RPB3	32582.7
DYL1_HUMAN	P63167;Q96FJ2	P63167	DYNLL1	Dynein light chain 1, cytoplasmic	32579.8
PR40A_HUMAN	O75400	O75400	PRPF40A	Pre-mRNA-processing factor 40 homolog A	32565.2
C1TM_HUMAN	Q6UB35	Q6UB35	MTHFD1L	Monofunctional C1-tetrahydrofolate synthase, mitochondrial	32557.3
UB2E2_HUMAN	Q96LR5;Q969T4;P51965	Q96LR5	UBE2E2	Ubiquitin-conjugating enzyme E2 E2	32534.7
BCAT1_HUMAN	P54687	P54687	BCAT1	Branched-chain-amino-acid aminotransferase, cytosolic	32531.5
ADK_HUMAN	P55263	P55263	ADK	Adenosine kinase	32507.7
AP1G1_HUMAN	O43747	O43747	AP1G1	AP-1 complex subunit gamma-1	32449.8
BAP31_HUMAN	P51572	P51572	BCAP31	B-cell receptor-associated protein 31	32438.7
AOFA_HUMAN	P21397	P21397	MAOA	Amine oxidase [flavin-containing] A	32398
RRP5_HUMAN	Q14690	Q14690	PDCD11	Protein RRP5 homolog	32361.9
RT22_HUMAN	P82650	P82650	MRPS22	Small ribosomal subunit protein mS22	32340.1
DPP2_HUMAN	Q9UHL4	Q9UHL4	DPP7	Dipeptidyl peptidase 2	32335.2
MCAT_HUMAN	O43772	O43772	SLC25A20	Mitochondrial carnitine/acylcarnitine carrier protein	32322.8
FKB10_HUMAN	Q96AY3	Q96AY3	FKBP10	Peptidyl-prolyl cis-trans isomerase FKBP10	32307.8
PSMD4_HUMAN	P55036;A2A3N6	P55036	PSMD4	26S proteasome non-ATPase regulatory subunit 4	32194.6
DHPR_HUMAN	P09417	P09417	QDPR	Dihydropteridine reductase	32146.1
ACAP1_HUMAN	Q15027	Q15027	ACAP1	Arf-GAP with coiled-coil, ANK repeat and PH domain-containing protein 1	32134.9
TS101_HUMAN	Q99816	Q99816	TSG101	Tumor susceptibility gene 101 protein	32076.2
EMAL2_HUMAN	O95834	O95834	EML2	Echinoderm microtubule-associated protein-like 2	32068.4
MCA3_HUMAN	O43324	O43324	EEF1E1	Eukaryotic translation elongation factor 1 epsilon-1	32063.2
CADH2_HUMAN	P19022	P19022	CDH2	Cadherin-2	32055.1
BLMH_HUMAN	Q13867	Q13867	BLMH	Bleomycin hydrolase	32027.1
SKI2_HUMAN	Q15477	Q15477	SKIC2	Superkiller complex protein 2	32001.8
FA98B_HUMAN	Q52LJ0	Q52LJ0	FAM98B	Protein FAM98B	31983.1
CP131_HUMAN	Q9UPN4	Q9UPN4	CEP131	Centrosomal protein of 131 kDa	31953.1
SEPT8_HUMAN	Q92599	Q92599	SEPTIN8	Septin-8	31947.9
RPIA_HUMAN	P49247	P49247	RPIA	Ribose-5-phosphate isomerase	31935.9
SYYM_HUMAN	Q9Y2Z4	Q9Y2Z4	YARS2	Tyrosine--tRNA ligase, mitochondrial	31911
DJC11_HUMAN	Q9NVH1	Q9NVH1	DNAJC11	DnaJ homolog subfamily C member 11	31879.7
PRR11_HUMAN	Q96HE9	Q96HE9	PRR11	Proline-rich protein 11	31866.7
AAPK1_HUMAN	Q13131	Q13131	PRKAA1	5'-AMP-activated protein kinase catalytic subunit alpha-1	31865.2
VTDB_HUMAN	P02774	P02774	GC	Vitamin D-binding protein	31809.5
IGHM_HUMAN	P01871	P01871	IGHM	Immunoglobulin heavy constant mu	31806.3
DPM3_HUMAN	Q9P2X0	Q9P2X0	DPM3	Dolichol-phosphate mannosyltransferase subunit 3	31799.8
CAPAM_HUMAN	Q9H4Z3	Q9H4Z3	PCIF1	mRNA (2'-O-methyladenosine-N(6)-)-methyltransferase	31784.3
ITPR3_HUMAN	Q14573	Q14573	ITPR3	Inositol 1,4,5-trisphosphate receptor type 3	31783.7
IF1AX_HUMAN	O14602;P47813	P47813	EIF1AX	Eukaryotic translation initiation factor 1A, X-chromosomal	31742.4
S27A1_HUMAN	Q6PCB7	Q6PCB7	SLC27A1	Long-chain fatty acid transport protein 1	31735.5
CLCC1_HUMAN	Q96S66	Q96S66	CLCC1	Chloride channel CLIC-like protein 1	31685.1
DFFA_HUMAN	O00273	O00273	DFFA	DNA fragmentation factor subunit alpha	31681.8
BAZ1B_HUMAN	Q9UIG0	Q9UIG0	BAZ1B	Tyrosine-protein kinase BAZ1B	31667.5
ABCE1_HUMAN	P61221	P61221	ABCE1	ATP-binding cassette sub-family E member 1	31666.5
PAXX_HUMAN	Q9BUH6	Q9BUH6	PAXX	Protein PAXX	31638.3
CO7A1_HUMAN	Q02388	Q02388	COL7A1	Collagen alpha-1(VII) chain	31624.5
RL36L_HUMAN	Q969Q0	Q969Q0	RPL36AL	Ribosomal protein eL42-like	31620.5
TBCC_HUMAN	Q15814	Q15814	TBCC	Tubulin-specific chaperone C	31618.8
PACS1_HUMAN	Q6VY07	Q6VY07	PACS1	Phosphofurin acidic cluster sorting protein 1	31597.7
CD2AP_HUMAN	Q9Y5K6	Q9Y5K6	CD2AP	CD2-associated protein	31595.8
RB33B_HUMAN	Q9H082	Q9H082	RAB33B	Ras-related protein Rab-33B	31587.4
TCOF_HUMAN	Q13428	Q13428	TCOF1	Treacle protein	31570.1
IMA3_HUMAN	O00629	O00629	KPNA4	Importin subunit alpha-3	31540.8
BPHL_HUMAN	Q86WA6	Q86WA6	BPHL	Valacyclovir hydrolase	31527.8
PBDC1_HUMAN	Q9BVG4	Q9BVG4	PBDC1	Protein PBDC1	31519.6
LAD1_HUMAN	O00515	O00515	LAD1	Ladinin-1	31442.9
PDPR_HUMAN	Q8NCN5	Q8NCN5	PDPR	Pyruvate dehydrogenase phosphatase regulatory subunit, mitochondrial	31441.5
GNAQ_HUMAN	P50148	P50148	GNAQ	Guanine nucleotide-binding protein G(q) subunit alpha	31430.7
PTN23_HUMAN	Q9H3S7	Q9H3S7	PTPN23	Tyrosine-protein phosphatase non-receptor type 23	31396.3
EI2BG_HUMAN	Q9NR50	Q9NR50	EIF2B3	Translation initiation factor eIF-2B subunit gamma	31365.2
IGLC2_HUMAN	P0DOY3;P0DOY2	P0DOY2	IGLC2	Immunoglobulin lambda constant 2	31339.2
ECM29_HUMAN	Q5VYK3	Q5VYK3	ECPAS	Proteasome adapter and scaffold protein ECM29	31311
BAX_HUMAN	Q07812	Q07812	BAX	Apoptosis regulator BAX	31281.6
CDK2_HUMAN	P24941;Q00526	P24941	CDK2	Cyclin-dependent kinase 2	31278.5
ACOHC_HUMAN	P21399	P21399	ACO1	Cytoplasmic aconitate hydratase	31266.1
CSN4_HUMAN	Q9BT78	Q9BT78	COPS4	COP9 signalosome complex subunit 4	31257.6
DHB12_HUMAN	Q53GQ0	Q53GQ0	HSD17B12	Very-long-chain 3-oxoacyl-CoA reductase	31256.6
SGPL1_HUMAN	O95470	O95470	SGPL1	Sphingosine-1-phosphate lyase 1	31239.2
CD11B_HUMAN	Q9UQ88;P21127	P21127	CDK11B	Cyclin-dependent kinase 11B	31218.8
LEG7_HUMAN	P47929	P47929	LGALS7B	Galectin-7	31204.7
FIS1_HUMAN	Q9Y3D6	Q9Y3D6	FIS1	Mitochondrial fission 1 protein	31117.9
CTBL1_HUMAN	Q8WYA6	Q8WYA6	CTNNBL1	Beta-catenin-like protein 1	31098
DCTP1_HUMAN	Q9H773	Q9H773	DCTPP1	dCTP pyrophosphatase 1	31092.8
ENDD1_HUMAN	O94919	O94919	ENDOD1	Endonuclease domain-containing 1 protein	31066.7
NU133_HUMAN	Q8WUM0	Q8WUM0	NUP133	Nuclear pore complex protein Nup133	31038.5
PRPK_HUMAN	Q96S44	Q96S44	TP53RK	EKC/KEOPS complex subunit TP53RK	31034.2
GNL1_HUMAN	P36915	P36915	GNL1	Guanine nucleotide-binding protein-like 1	31021.5
ARFG2_HUMAN	Q8N6H7	Q8N6H7	ARFGAP2	ADP-ribosylation factor GTPase-activating protein 2	30993.5
EI2BE_HUMAN	Q13144	Q13144	EIF2B5	Translation initiation factor eIF-2B subunit epsilon	30970
RD23A_HUMAN	P54725	P54725	RAD23A	UV excision repair protein RAD23 homolog A	30969.7
R39L5_HUMAN;RL39_HUMAN	P62891;Q59GN2	P62891;Q59GN2	RPL39;RPL39P5	Large ribosomal subunit protein eL39	30949.1
MAVS_HUMAN	Q7Z434	Q7Z434	MAVS	Mitochondrial antiviral-signaling protein	30937.5
TRI29_HUMAN	Q14134	Q14134	TRIM29	Tripartite motif-containing protein 29	30910.6
NUDT5_HUMAN	Q9UKK9	Q9UKK9	NUDT5	ADP-sugar pyrophosphatase	30862
MTAP_HUMAN	Q13126	Q13126	MTAP	S-methyl-5'-thioadenosine phosphorylase	30843.7
NHLC2_HUMAN	Q8NBF2	Q8NBF2	NHLRC2	NHL repeat-containing protein 2	30842.8
YLPM1_HUMAN	P49750	P49750	YLPM1	YLP motif-containing protein 1	30817.8
RRAS_HUMAN	P10301	P10301	RRAS	Ras-related protein R-Ras	30814.6
PANK1_HUMAN	Q9H999;Q8TE04	Q8TE04	PANK1	Pantothenate kinase 1	30810.7
SEP11_HUMAN	Q9NVA2;Q92599;Q14141	Q9NVA2	SEPTIN11	Septin-11	30798.9
CK068_HUMAN	Q9H3H3	Q9H3H3	C11orf68	UPF0696 protein C11orf68	30708.8
TOLIP_HUMAN	Q9H0E2	Q9H0E2	TOLLIP	Toll-interacting protein	30699.8
TX1B3_HUMAN	O14907	O14907	TAX1BP3	Tax1-binding protein 3	30684.9
DAZP1_HUMAN	Q96EP5	Q96EP5	DAZAP1	DAZ-associated protein 1	30682.1
CCD33_HUMAN	Q8N5R6	Q8N5R6	CCDC33	Coiled-coil domain-containing protein 33	30662.1
MUC1_HUMAN	P15941	P15941	MUC1	Mucin-1	30641.6
SRPRA_HUMAN	P08240	P08240	SRPRA	Signal recognition particle receptor subunit alpha	30628.2
RAB4A_HUMAN	P20338	P20338	RAB4A	Ras-related protein Rab-4A	30576
SLK_HUMAN	Q9H2G2	Q9H2G2	SLK	STE20-like serine/threonine-protein kinase	30568.3
TRI47_HUMAN	Q96LD4	Q96LD4	TRIM47	E3 ubiquitin-protein ligase TRIM47	30559.5
PPM1G_HUMAN	O15355	O15355	PPM1G	Protein phosphatase 1G	30528.6
THUM1_HUMAN	Q9NXG2	Q9NXG2	THUMPD1	THUMP domain-containing protein 1	30507.2
VATH_HUMAN	Q9UI12	Q9UI12	ATP6V1H	V-type proton ATPase subunit H	30472.1
SUCB1_HUMAN	Q9P2R7	Q9P2R7	SUCLA2	Succinate--CoA ligase [ADP-forming] subunit beta, mitochondrial	30405.3
GSLG1_HUMAN	Q92896	Q92896	GLG1	Golgi apparatus protein 1	30355
RPR1A_HUMAN	Q96P16	Q96P16	RPRD1A	Regulation of nuclear pre-mRNA domain-containing protein 1A	30351.5
NEUL_HUMAN	Q9BYT8	Q9BYT8	NLN	Neurolysin, mitochondrial	30350.5
TOM40_HUMAN	O96008	O96008	TOMM40	Mitochondrial import receptor subunit TOM40 homolog	30346.2
E41L1_HUMAN	P11171;Q9H4G0;Q9Y2J2	Q9H4G0	EPB41L1	Band 4.1-like protein 1	30329.7
KV224_HUMAN;KVD24_HUMAN	A0A075B6R9;A0A0C4DH68	A0A075B6R9;A0A0C4DH68	IGKV2-24;IGKV2D-24	Probable non-functional immunoglobulin kappa variable 2D-24	30264.3
ITA6_HUMAN	P23229	P23229	ITGA6	Integrin alpha-6	30262
CMTR1_HUMAN	Q8N1G2	Q8N1G2	CMTR1	Cap-specific mRNA (nucleoside-2'-O-)-methyltransferase 1	30158.8
MTX2_HUMAN	O75431	O75431	MTX2	Metaxin-2	30088.3
RM50_HUMAN	Q8N5N7	Q8N5N7	MRPL50	Large ribosomal subunit protein mL50	30086
STXB5_HUMAN	Q5T5C0	Q5T5C0	STXBP5	Syntaxin-binding protein 5	30076.8
UB2V2_HUMAN	Q15819	Q15819	UBE2V2	Ubiquitin-conjugating enzyme E2 variant 2	30042.9
TTHY_HUMAN	P02766	P02766	TTR	Transthyretin	30029.1
SPIT1_HUMAN	O43278	O43278	SPINT1	Kunitz-type protease inhibitor 1	30009.3
LPP_HUMAN	Q93052	Q93052	LPP	Lipoma-preferred partner	29997.6
ZRAB2_HUMAN	O95218	O95218	ZRANB2	Zinc finger Ran-binding domain-containing protein 2	29994.8
ADRO_HUMAN	P22570	P22570	FDXR	NADPH:adrenodoxin oxidoreductase, mitochondrial	29985.8
5MP2_HUMAN	Q7L1Q6	Q7L1Q6	BZW1	eIF5-mimic protein 2	29977.5
KT3K_HUMAN	Q9HA64	Q9HA64	FN3KRP	Ketosamine-3-kinase	29943.7
DEF1_HUMAN;DEF3_HUMAN	P59666;P59665	P59665;P59666	DEFA1B;DEFA3	Neutrophil defensin 1	29910.9
SIN3A_HUMAN	Q96ST3	Q96ST3	SIN3A	Paired amphipathic helix protein Sin3a	29899.8
MSS4_HUMAN	P47224	P47224	RABIF	Guanine nucleotide exchange factor MSS4	29890.3
LSR_HUMAN	Q86X29	Q86X29	LSR	Lipolysis-stimulated lipoprotein receptor	29879.5
2A5D_HUMAN	Q14738	Q14738	PPP2R5D	Serine/threonine-protein phosphatase 2A 56 kDa regulatory subunit delta isoform	29872.2
DACH1_HUMAN	Q9UI36	Q9UI36	DACH1	Dachshund homolog 1	29845.2
CDIPT_HUMAN	O14735	O14735	CDIPT	CDP-diacylglycerol--inositol 3-phosphatidyltransferase	29833.8
WDFY1_HUMAN	Q8IWB7	Q8IWB7	WDFY1	WD repeat and FYVE domain-containing protein 1	29833.2
HTSF1_HUMAN	O43719	O43719	HTATSF1	HIV Tat-specific factor 1	29832.5
PP4C_HUMAN	P60510	P60510	PPP4C	Serine/threonine-protein phosphatase 4 catalytic subunit	29822.5
LZTL1_HUMAN	Q9NQ48	Q9NQ48	LZTFL1	Leucine zipper transcription factor-like protein 1	29810.7
BACH_HUMAN	O00154	O00154	ACOT7	Cytosolic acyl coenzyme A thioester hydrolase	29803.6
PP6R3_HUMAN	Q5H9R7	Q5H9R7	PPP6R3	Serine/threonine-protein phosphatase 6 regulatory subunit 3	29790.4
AOFB_HUMAN	P27338	P27338	MAOB	Amine oxidase [flavin-containing] B	29780.2
CPT1A_HUMAN	P50416	P50416	CPT1A	Carnitine O-palmitoyltransferase 1, liver isoform	29779.2
HEXA_HUMAN	P06865	P06865	HEXA	Beta-hexosaminidase subunit alpha	29757.2
TYPH_HUMAN	P19971	P19971	TYMP	Thymidine phosphorylase	29703.8
SPD2B_HUMAN	A1X283	A1X283	SH3PXD2B	SH3 and PX domain-containing protein 2B	29674.9
IF2M_HUMAN	P46199	P46199	MTIF2	Translation initiation factor IF-2, mitochondrial	29669.3
ARHG7_HUMAN	Q14155	Q14155	ARHGEF7	Rho guanine nucleotide exchange factor 7	29629.4
THNS1_HUMAN	Q8IYQ7	Q8IYQ7	THNSL1	Threonine synthase-like 1	29620.4
COR1C_HUMAN	Q9ULV4	Q9ULV4	CORO1C	Coronin-1C	29581.5
GNPI1_HUMAN	P46926;Q8TDQ7	P46926	GNPDA1	Glucosamine-6-phosphate isomerase 1	29539.5
ATP6_HUMAN	P00846	P00846	MT-ATP6	ATP synthase subunit a	29526
TYY1_HUMAN	P25490	P25490	YY1	Transcriptional repressor protein YY1	29525.9
CHM2A_HUMAN	O43633	O43633	CHMP2A	Charged multivesicular body protein 2a	29491.3
INT7_HUMAN	Q9NVH2	Q9NVH2	INTS7	Integrator complex subunit 7	29476.7
IF4E_HUMAN	P06730	P06730	EIF4E	Eukaryotic translation initiation factor 4E	29459.1
TM109_HUMAN	Q9BVC6	Q9BVC6	TMEM109	Transmembrane protein 109	29453.4
KLC1_HUMAN	Q9NSK0;Q07866;Q9H0B6	Q07866	KLC1	Kinesin light chain 1	29436.8
EHD1_HUMAN	Q9H4M9;Q9NZN3	Q9H4M9	EHD1	EH domain-containing protein 1	29420.7
PAF1_HUMAN	Q8N7H5	Q8N7H5	PAF1	RNA polymerase II-associated factor 1 homolog	29406.5
GRSF1_HUMAN	Q12849	Q12849	GRSF1	G-rich sequence factor 1	29373.2
RER1_HUMAN	O15258	O15258	RER1	Protein RER1	29354.4
PIPNB_HUMAN	P48739	P48739	PITPNB	Phosphatidylinositol transfer protein beta isoform	29348.5
VATG1_HUMAN	O75348	O75348	ATP6V1G1	V-type proton ATPase subunit G 1	29321.1
PTPRA_HUMAN	P18433	P18433	PTPRA	Receptor-type tyrosine-protein phosphatase alpha	29318.3
SEC13_HUMAN	P55735	P55735	SEC13	Protein SEC13 homolog	29317.7
AGK_HUMAN	Q53H12	Q53H12	AGK	Acylglycerol kinase, mitochondrial	29279.7
CIP4_HUMAN	Q15642	Q15642	TRIP10	Cdc42-interacting protein 4	29270.4
KIF1A_HUMAN	Q12756	Q12756	KIF1A	Kinesin-like protein KIF1A	29255.6
NPS3A_HUMAN	Q9UFN0;Q9BS92	Q9UFN0	NIPSNAP3A	Protein NipSnap homolog 3A	29253.2
CFAI_HUMAN	P05156	P05156	CFI	Complement factor I	29242.8
PLST_HUMAN	P13797	P13797	PLS3	Plastin-3	29201.8
ABI1_HUMAN	Q9NYB9;Q8IZP0	Q8IZP0	ABI1	Abl interactor 1	29198.2
SGMR1_HUMAN	Q99720	Q99720	SIGMAR1	Sigma non-opioid intracellular receptor 1	29180.9
C2D1A_HUMAN	Q6P1N0	Q6P1N0	CC2D1A	Coiled-coil and C2 domain-containing protein 1A	29158.5
ARL8A_HUMAN	Q96BM9	Q96BM9	ARL8A	ADP-ribosylation factor-like protein 8A	29157.4
DDI2_HUMAN	Q5TDH0	Q5TDH0	DDI2	Protein DDI1 homolog 2	29142.4
AP2A2_HUMAN	O94973	O94973	AP2A2	AP-2 complex subunit alpha-2	29095.8
OSBP1_HUMAN	P22059	P22059	OSBP	Oxysterol-binding protein 1	29064.5
PALLD_HUMAN	Q8WX93	Q8WX93	PALLD	Palladin	29041.1
SRSF5_HUMAN	Q13243	Q13243	SRSF5	Serine/arginine-rich splicing factor 5	29027.4
DENR_HUMAN	O43583	O43583	DENR	Density-regulated protein	28989.3
GLYC_HUMAN	P34896	P34896	SHMT1	Serine hydroxymethyltransferase, cytosolic	28966.8
PKN2_HUMAN	Q16513	Q16513	PKN2	Serine/threonine-protein kinase N2	28944.6
NSDHL_HUMAN	Q15738	Q15738	NSDHL	Sterol-4-alpha-carboxylate 3-dehydrogenase, decarboxylating	28940.8
PTGR2_HUMAN	Q8N8N7	Q8N8N7	PTGR2	Prostaglandin reductase 2	28917.3
NXN_HUMAN	Q6DKJ4	Q6DKJ4	NXN	Nucleoredoxin	28889
EXOC3_HUMAN	O60645	O60645	EXOC3	Exocyst complex component 3	28885.6
TF3C2_HUMAN	Q8WUA4	Q8WUA4	GTF3C2	General transcription factor 3C polypeptide 2	28882.9
GHITM_HUMAN	Q9H3K2	Q9H3K2	GHITM	Growth hormone-inducible transmembrane protein	28838.4
NU214_HUMAN	P35658	P35658	NUP214	Nuclear pore complex protein Nup214	28833.4
PPIL4_HUMAN	Q8WUA2	Q8WUA2	PPIL4	Peptidyl-prolyl cis-trans isomerase-like 4	28828.1
ARFP1_HUMAN	P53367	P53367	ARFIP1	Arfaptin-1	28819.9
RT07_HUMAN	Q9Y2R9	Q9Y2R9	MRPS7	Small ribosomal subunit protein uS7m	28795.8
FAD1_HUMAN	Q8NFF5	Q8NFF5	FLAD1	FAD synthase	28774
SNG2_HUMAN	O43760	O43760	SYNGR2	Synaptogyrin-2	28772.4
PWP2_HUMAN	Q15269	Q15269	PWP2	Periodic tryptophan protein 2 homolog	28743.6
SCRN1_HUMAN	Q12765	Q12765	SCRN1	Secernin-1	28736.4
HDAC6_HUMAN	Q9UBN7	Q9UBN7	HDAC6	Histone deacetylase 6	28736
NAA25_HUMAN	Q14CX7	Q14CX7	NAA25	N-alpha-acetyltransferase 25, NatB auxiliary subunit	28730.7
NDRG3_HUMAN	Q9UGV2	Q9UGV2	NDRG3	Protein NDRG3	28706.3
SFXN1_HUMAN	Q9H9B4	Q9H9B4	SFXN1	Sideroflexin-1	28705.3
MAP1S_HUMAN	Q66K74	Q66K74	MAP1S	Microtubule-associated protein 1S	28664.2
UTP18_HUMAN	Q9Y5J1	Q9Y5J1	UTP18	U3 small nucleolar RNA-associated protein 18 homolog	28637
GNAI1_HUMAN	P63096	P63096	GNAI1	Guanine nucleotide-binding protein G(i) subunit alpha-1	28635.8
GSTM1_HUMAN	P46439;P09488	P09488	GSTM1	Glutathione S-transferase Mu 1	28631.5
SYCC_HUMAN	P49589	P49589	CARS1	Cysteine--tRNA ligase, cytoplasmic	28625.1
PPIL1_HUMAN	Q9Y3C6	Q9Y3C6	PPIL1	Peptidyl-prolyl cis-trans isomerase-like 1	28608.2
GLO2_HUMAN	Q16775	Q16775	HAGH	Hydroxyacylglutathione hydrolase, mitochondrial	28582.2
CROCC_HUMAN	Q5TZA2	Q5TZA2	CROCC	Rootletin	28571.8
ARL3_HUMAN	P36405	P36405	ARL3	ADP-ribosylation factor-like protein 3	28571.2
GMPR1_HUMAN	P36959	P36959	GMPR	GMP reductase 1	28500.5
VPS36_HUMAN	Q86VN1	Q86VN1	VPS36	Vacuolar protein-sorting-associated protein 36	28495.3
CFA99_HUMAN	D6REC4	D6REC4	CFAP99	Cilia- and flagella-associated protein 99	28477.1
RBM47_HUMAN	A0AV96	A0AV96	RBM47	RNA-binding protein 47	28458.5
HEM6_HUMAN	P36551	P36551	CPOX	Oxygen-dependent coproporphyrinogen-III oxidase, mitochondrial	28458
RT24_HUMAN	Q96EL2	Q96EL2	MRPS24	Small ribosomal subunit protein uS3m	28438.6
PSME4_HUMAN	Q14997	Q14997	PSME4	Proteasome activator complex subunit 4	28432
SQOR_HUMAN	Q9Y6N5	Q9Y6N5	SQOR	Sulfide:quinone oxidoreductase, mitochondrial	28427.7
MFF_HUMAN	Q9GZY8	Q9GZY8	MFF	Mitochondrial fission factor	28405.7
HDHD5_HUMAN	Q9BXW7	Q9BXW7	HDHD5	Haloacid dehalogenase-like hydrolase domain-containing 5	28388.1
DHR11_HUMAN	Q6UWP2	Q6UWP2	DHRS11	Dehydrogenase/reductase SDR family member 11	28379.4
LDAH_HUMAN	Q9H6V9	Q9H6V9	LDAH	Lipid droplet-associated hydrolase	28379.1
GSTM2_HUMAN	Q03013;P09488;P28161	P28161	GSTM2	Glutathione S-transferase Mu 2	28367.1
CREB1_HUMAN	P18846;P16220	P16220	CREB1	Cyclic AMP-responsive element-binding protein 1	28357.6
STOM_HUMAN	P27105	P27105	STOM	Stomatin	28357
QCR6_HUMAN	P07919	P07919	UQCRH	Cytochrome b-c1 complex subunit 6, mitochondrial	28337.2
MP2K6_HUMAN	P52564	P52564	MAP2K6	Dual specificity mitogen-activated protein kinase kinase 6	28319.8
TMT1A_HUMAN	Q9H8H3	Q9H8H3	TMT1A	N6-adenosine-methyltransferase TMT1A	28319
KPRB_HUMAN	O60256	O60256	PRPSAP2	Phosphoribosyl pyrophosphate synthase-associated protein 2	28318.5
RT28_HUMAN	Q9Y2Q9	Q9Y2Q9	MRPS28	Small ribosomal subunit protein bS1m	28298.4
MUTA_HUMAN	P22033	P22033	MMUT	Methylmalonyl-CoA mutase, mitochondrial	28297.3
VATE1_HUMAN	P36543	P36543	ATP6V1E1	V-type proton ATPase subunit E 1	28296
CD63_HUMAN	P08962	P08962	CD63	CD63 antigen	28152.3
RCN2_HUMAN	Q14257	Q14257	RCN2	Reticulocalbin-2	28148.6
CYB5_HUMAN	P00167	P00167	CYB5A	Cytochrome b5	28145.9
CFAH_HUMAN	P08603	P08603	CFH	Complement factor H	28117.5
SMU1_HUMAN	Q2TAY7	Q2TAY7	SMU1	WD40 repeat-containing protein SMU1	28110.7
PTN11_HUMAN	Q06124	Q06124	PTPN11	Tyrosine-protein phosphatase non-receptor type 11	28096.8
EMC8_HUMAN	O43402	O43402	EMC8	ER membrane protein complex subunit 8	28076.4
MYLK_HUMAN	Q15746	Q15746	MYLK	Myosin light chain kinase, smooth muscle	28033.1
DDX50_HUMAN	Q9BQ39	Q9BQ39	DDX50	ATP-dependent RNA helicase DDX50	28026.2
COCA1_HUMAN	Q99715	Q99715	COL12A1	Collagen alpha-1(XII) chain	28023.7
HYI_HUMAN	Q5T013	Q5T013	HYI	Putative hydroxypyruvate isomerase	28023.2
LRP1_HUMAN	Q07954	Q07954	LRP1	Prolow-density lipoprotein receptor-related protein 1	28008.2
MAP7_HUMAN	Q14244	Q14244	MAP7	Ensconsin	27976
PTGR3_HUMAN	Q8N4Q0	Q8N4Q0	PTGR3	Prostaglandin reductase 3	27909.6
BLTP2_HUMAN	Q14667	Q14667	BLTP2	Bridge-like lipid transfer protein family member 2	27903.3
GNL3_HUMAN	Q9BVP2	Q9BVP2	GNL3	Guanine nucleotide-binding protein-like 3	27880
CHMP3_HUMAN	Q9Y3E7	Q9Y3E7	CHMP3	Charged multivesicular body protein 3	27831.4
SIR5_HUMAN	Q9NXA8	Q9NXA8	SIRT5	NAD-dependent protein deacylase sirtuin-5, mitochondrial	27809.8
RM21_HUMAN	Q7Z2W9	Q7Z2W9	MRPL21	Large ribosomal subunit protein bL21m	27804
TMX4_HUMAN	Q9H1E5	Q9H1E5	TMX4	Thioredoxin-related transmembrane protein 4	27740.2
CUL3_HUMAN	Q13618	Q13618	CUL3	Cullin-3	27698.4
SPIT2_HUMAN	O43291	O43291	SPINT2	Kunitz-type protease inhibitor 2	27571.6
SRPRB_HUMAN	Q9Y5M8	Q9Y5M8	SRPRB	Signal recognition particle receptor subunit beta	27558.1
U3IP2_HUMAN	O43818	O43818	RRP9	U3 small nucleolar RNA-interacting protein 2	27540.8
CHTOP_HUMAN	Q9Y3Y2	Q9Y3Y2	CHTOP	Chromatin target of PRMT1 protein	27508.8
CELF1_HUMAN	Q92879	Q92879	CELF1	CUGBP Elav-like family member 1	27474.3
LMA2L_HUMAN	Q9H0V9	Q9H0V9	LMAN2L	VIP36-like protein	27459.6
MTREX_HUMAN	P42285	P42285	MTREX	Exosome RNA helicase MTR4	27425.6
DNJA2_HUMAN	O60884	O60884	DNAJA2	DnaJ homolog subfamily A member 2	27411.7
GLRX3_HUMAN	O76003	O76003	GLRX3	Glutaredoxin-3	27409.3
NDUS7_HUMAN	O75251	O75251	NDUFS7	NADH dehydrogenase [ubiquinone] iron-sulfur protein 7, mitochondrial	27403.6
N42L2_HUMAN	Q92802	Q92802	N4BP2L2	NEDD4-binding protein 2-like 2	27385.9
PTPA_HUMAN	Q15257	Q15257	PTPA	Serine/threonine-protein phosphatase 2A activator	27353.6
RRP44_HUMAN	Q9Y2L1	Q9Y2L1	DIS3	Exosome complex exonuclease RRP44	27319.8
UBL4A_HUMAN	P11441	P11441	UBL4A	Ubiquitin-like protein 4A	27310.2
WBP11_HUMAN	Q9Y2W2	Q9Y2W2	WBP11	WW domain-binding protein 11	27303.5
ATPMK_HUMAN	Q96IX5	Q96IX5	ATP5MK	ATP synthase membrane subunit K, mitochondrial	27292.7
UBL5_HUMAN	Q9BZL1	Q9BZL1	UBL5	Ubiquitin-like protein 5	27290.2
USE1_HUMAN	Q9NZ43	Q9NZ43	USE1	Vesicle transport protein USE1	27274.8
NUD19_HUMAN	A8MXV4	A8MXV4	NUDT19	Acyl-coenzyme A diphosphatase NUDT19	27257.7
KPCD_HUMAN	Q05655	Q05655	PRKCD	Protein kinase C delta type	27250.9
ABHDA_HUMAN	Q9NUJ1	Q9NUJ1	ABHD10	Palmitoyl-protein thioesterase ABHD10, mitochondrial	27243.9
TCTP_HUMAN	Q56UQ5;P13693	P13693	TPT1	Translationally-controlled tumor protein	27214.5
ECHD1_HUMAN	Q9NTX5	Q9NTX5	ECHDC1	Ethylmalonyl-CoA decarboxylase	27166.9
CSK23_HUMAN	Q8NEV1	Q8NEV1	CSNK2A3	Casein kinase II subunit alpha 3	27151.4
RM43_HUMAN	Q8N983	Q8N983	MRPL43	Large ribosomal subunit protein mL43	27141
RAB35_HUMAN	Q15286	Q15286	RAB35	Ras-related protein Rab-35	27119.7
TM10C_HUMAN	Q7L0Y3	Q7L0Y3	TRMT10C	tRNA methyltransferase 10 homolog C	27079.4
RAB25_HUMAN	P57735	P57735	RAB25	Ras-related protein Rab-25	27076.6
SODE_HUMAN	P08294	P08294	SOD3	Extracellular superoxide dismutase [Cu-Zn]	27068.5
ZN326_HUMAN	Q5BKZ1	Q5BKZ1	ZNF326	DBIRD complex subunit ZNF326	27028.9
RNT2_HUMAN	O00584	O00584	RNASET2	Ribonuclease T2	27027.4
AIDA_HUMAN	Q96BJ3	Q96BJ3	AIDA	Axin interactor, dorsalization-associated protein	27020.9
COR1A_HUMAN	P31146	P31146	CORO1A	Coronin-1A	27002.2
DPB1_HUMAN	P04440	P04440	HLA-DPB1	HLA class II histocompatibility antigen, DP beta 1 chain	26987.9
RT02_HUMAN	Q9Y399	Q9Y399	MRPS2	Small ribosomal subunit protein uS2m	26973.6
AAMDC_HUMAN	Q9H7C9	Q9H7C9	AAMDC	Mth938 domain-containing protein	26968.4
PLOD1_HUMAN	Q02809	Q02809	PLOD1	Procollagen-lysine,2-oxoglutarate 5-dioxygenase 1	26955.5
DNJC9_HUMAN	Q8WXX5	Q8WXX5	DNAJC9	DnaJ homolog subfamily C member 9	26955
DIAP1_HUMAN	O60610	O60610	DIAPH1	Protein diaphanous homolog 1	26938.9
DNLI3_HUMAN	P49916	P49916	LIG3	DNA ligase 3	26918.3
TPD52_HUMAN	P55327	P55327	TPD52	Tumor protein D52	26916
MEIS1_HUMAN	O00470;O14770	O00470	MEIS1	Homeobox protein Meis1	26888.8
IMP3_HUMAN	Q9NV31	Q9NV31	IMP3	U3 small nucleolar ribonucleoprotein protein IMP3	26867.5
TM9S2_HUMAN	Q99805	Q99805	TM9SF2	Transmembrane 9 superfamily member 2	26853.6
NIF3L_HUMAN	Q9GZT8	Q9GZT8	NIF3L1	NIF3-like protein 1	26850.3
BOP1_HUMAN	Q14137	Q14137	BOP1	Ribosome biogenesis protein BOP1	26849.9
GAK_HUMAN	O14976	O14976	GAK	Cyclin-G-associated kinase	26831.2
DRB5_HUMAN	Q30154	Q30154	HLA-DRB5	HLA class II histocompatibility antigen, DR beta 5 chain	26769.6
RU2B_HUMAN	P08579	P08579	SNRPB2	U2 small nuclear ribonucleoprotein B''	26756.9
SERB_HUMAN	P78330	P78330	PSPH	Phosphoserine phosphatase	26753.4
TSN3_HUMAN	O60637	O60637	TSPAN3	Tetraspanin-3	26742.5
SPB1_HUMAN	Q8IY81	Q8IY81	FTSJ3	pre-rRNA 2'-O-ribose RNA methyltransferase FTSJ3	26670.3
TIM50_HUMAN	Q3ZCQ8	Q3ZCQ8	TIMM50	Mitochondrial import inner membrane translocase subunit TIM50	26664.9
TMLH_HUMAN	Q9NVH6	Q9NVH6	TMLHE	Trimethyllysine dioxygenase, mitochondrial	26649.6
NUP54_HUMAN	Q7Z3B4	Q7Z3B4	CLTB	Nucleoporin p54	26648.3
CLCB_HUMAN	P09497	P09497	NUP54	Clathrin light chain B	26648.3
SYNE2_HUMAN	Q8WXH0	Q8WXH0	SYNE2	Nesprin-2	26647.2
BGAL_HUMAN	P16278	P16278	GLB1	Beta-galactosidase	26611.4
DUT_HUMAN	P33316	P33316	DUT	Deoxyuridine 5'-triphosphate nucleotidohydrolase, mitochondrial	26602.2
UBP2L_HUMAN	Q14157	Q14157	UBAP2L	Ubiquitin-associated protein 2-like	26585.4
SPHM_HUMAN	P51688	P51688	SGSH	N-sulphoglucosamine sulphohydrolase	26577
KRR1_HUMAN	Q13601	Q13601	KRR1	KRR1 small subunit processome component homolog	26572.4
TSYL5_HUMAN	Q86VY4	Q86VY4	TSPYL5	Testis-specific Y-encoded-like protein 5	26569.2
RRAGA_HUMAN	Q5VZM2;Q7L523	Q7L523	RRAGA	Ras-related GTP-binding protein A	26535.5
PSME3_HUMAN	P61289	P61289	PSME3	Proteasome activator complex subunit 3	26534.2
GHC1_HUMAN	Q9H936	Q9H936	SLC25A22	Mitochondrial glutamate carrier 1	26514.7
[truncated: 6,268 more rows]
