# Supplementary material for: Spatial proteomics of ovarian cancer precursors delineates early disease changes and drug targets
Source: Mol Syst Biol. 2025 Nov 13;22(1):7–41. doi: 10.1038/s44320-025-00168-4 (PMC12759074; doi:10.1038/s44320-025-00168-4)
Supplement: Supplementary file 9 — Dataset EV3 [file 44320_2025_168_MOESM9_ESM.xlsx]

## Sheet: Legend
Dataset EV3. Median raw intensity values for each identified protein in STIC stroma samples. Intensities are reported in arbitrary units as generated by DIA-NN software without normalization. Only proteins quantified in at least 15 replicates across all corresponding samples were included.

## Sheet: Dataset EV3
Protein Name	Protein IDs	Protein Group	Genes	First protein description	Median intensity
HBB_HUMAN	P68871;P02042	P68871	HBB	Hemoglobin subunit beta	26019100
HBA_HUMAN	P69905	P69905	HBA2	Hemoglobin subunit alpha	11359600
ALBU_HUMAN	P02768	P02768	ALB	Albumin	10913600
H2B1C_HUMAN;H2B1D_HUMAN;H2B1H_HUMAN;H2B1K_HUMAN;H2B1M_HUMAN;H2B1N_HUMAN;H2B2F_HUMAN	Q99879;P57053;Q5QNW6;Q16778;O60814;P62807;P23527;P06899;Q99880;Q99877;P33778;Q93079;Q8N257;Q96A08;P58876	O60814;P58876;P62807;Q5QNW6;Q93079;Q99877;Q99879	H2BC10;H2BC12;H2BC14;H2BC15;H2BC18;H2BC5;H2BC9	Histone H2B type 1-K	9322880
CO1A1_HUMAN	P02452	P02452	COL1A1	Collagen alpha-1(I) chain	9319180
H4_HUMAN	P62805	P62805	H4C16	Histone H4	9157190
CO6A3_HUMAN	P12111	P12111	COL6A3	Collagen alpha-3(VI) chain	5751290
H2A1D_HUMAN	P0C0S8;P04908;Q6FI13;P20671;Q9BTM1;Q99878;Q7L7L0;Q93077;Q16777;Q96KK5	P20671	H2AC7	Histone H2A type 1-D	4656080
CO6A1_HUMAN	P12109	P12109	COL6A1	Collagen alpha-1(VI) chain	4393140
CO6A2_HUMAN	P12110	P12110	COL6A2	Collagen alpha-2(VI) chain	4145470
IGHG1_HUMAN	P01859;P01857	P01857	IGHG1	Immunoglobulin heavy constant gamma 1	4084900
H37_HUMAN	P84243;Q5TEC6;Q71DI3;P68431;Q6NXT2;Q16695	Q5TEC6	H3-7	Histone H3-7	3968740
TGM2_HUMAN	P21980	P21980	TGM2	Protein-glutamine gamma-glutamyltransferase 2	3788000
IGHG2_HUMAN	P01859	P01859	IGHG2	Immunoglobulin heavy constant gamma 2	3415570
RS27A_HUMAN	P0CG47;P0CG48;P62979;P62987	P62979	RPS27A	Ubiquitin-ribosomal protein eS31 fusion protein	2964940
HPT_HUMAN	P00738	P00738	HP	Haptoglobin	2651610
HBD_HUMAN	P02042	P02042	HBD	Hemoglobin subunit delta	2639740
A1AT_HUMAN	P01009	P01009	SERPINA1	Alpha-1-antitrypsin	2528370
LMNA_HUMAN	P02545	P02545	LMNA	Prelamin-A/C	2356660
H14_HUMAN	Q02539;P16402;P10412;P16401;P16403	P10412	H1-4	Histone H1.4	2193880
IGHA1_HUMAN	P01877;P01876	P01876	IGHA1	Immunoglobulin heavy constant alpha 1	2072180
ANXA5_HUMAN	P08758	P08758	ANXA5	Annexin A5	2019960
TBB2B_HUMAN	Q13885;Q9BVA1	Q9BVA1	TUBB2B	Tubulin beta-2B chain	1990300
PRDX1_HUMAN	Q06830	Q06830	PRDX1	Peroxiredoxin-1	1897130
TRFE_HUMAN	P02787	P02787	TF	Serotransferrin	1893560
MIME_HUMAN	P20774	P20774	OGN	Mimecan	1768850
CO3A1_HUMAN	P02461	P02461	COL3A1	Collagen alpha-1(III) chain	1765570
MYH11_HUMAN	P35749	P35749	MYH11	Myosin-11	1702750
APOA1_HUMAN	P02647	P02647	APOA1	Apolipoprotein A-I	1620370
H10_HUMAN	P07305	P07305	H1-0	Histone H1.0	1617120
CO3_HUMAN	P01024	P01024	C3	Complement C3	1604120
MYL6_HUMAN	P60660	P60660	MYL6	Myosin light polypeptide 6	1580530
KPYM_HUMAN	P14618	P14618	PKM	Pyruvate kinase PKM	1550760
S10A6_HUMAN	P06703	P06703	S100A6	Protein S100-A6	1512660
POSTN_HUMAN	Q15063	Q15063	POSTN	Periostin	1471940
ROA2_HUMAN	P22626	P22626	HNRNPA2B1	Heterogeneous nuclear ribonucleoproteins A2/B1	1395460
IGKC_HUMAN	P01834	P01834	IGKC	Immunoglobulin kappa constant	1372280
LEG1_HUMAN	P09382	P09382	LGALS1	Galectin-1	1348400
KV320_HUMAN	P01619	P01619	IGKV3-20	Immunoglobulin kappa variable 3-20	1332630
HSPB1_HUMAN	P04792	P04792	HSPB1	Heat shock protein beta-1	1308940
TBB4B_HUMAN	Q3ZCM7;P68371	P68371	TUBB4B	Tubulin beta-4B chain	1299470
1433E_HUMAN	P62258	P62258	YWHAE	14-3-3 protein epsilon	1295240
FLNA_HUMAN	P21333	P21333	FLNA	Filamin-A	1294920
G3P_HUMAN	P04406	P04406	GAPDH	Glyceraldehyde-3-phosphate dehydrogenase	1276990
MYH9_HUMAN	P35579	P35579	MYH9	Myosin-9	1269740
PPIA_HUMAN	P62937	P62937	PPIA	Peptidyl-prolyl cis-trans isomerase A	1261740
DESM_HUMAN	P17661	P17661	DES	Desmin	1230820
PRDX6_HUMAN	P30041	P30041	PRDX6	Peroxiredoxin-6	1169980
FIBB_HUMAN	P02675	P02675	FGB	Fibrinogen beta chain	1145880
ANXA2_HUMAN	P07355;A6NMY6	P07355	ANXA2	Annexin A2	1107960
ATPB_HUMAN	P06576	P06576	ATP5F1B	ATP synthase subunit beta, mitochondrial	1094740
AL1A1_HUMAN	P00352	P00352	ALDH1A1	Aldehyde dehydrogenase 1A1	1054680
MOES_HUMAN	P15311;P35241;P26038	P26038	MSN	Moesin	1029590
KV311_HUMAN;KVD11_HUMAN	A0A0A0MRZ8;P04433	A0A0A0MRZ8;P04433	IGKV3-11;IGKV3D-11	Immunoglobulin kappa variable 3D-11	1025960
CALM1_HUMAN;CALM2_HUMAN;CALM3_HUMAN	P0DP24;P0DP25;P0DP23	P0DP23;P0DP24;P0DP25	CALM1;CALM2;CALM3	Calmodulin-1	1025570
COEA1_HUMAN	Q05707	Q05707	COL14A1	Collagen alpha-1(XIV) chain	997688
ENOA_HUMAN	P06733	P06733	ENO1	Alpha-enolase	980646
ENPL_HUMAN	P14625	P14625	HSP90B1	Endoplasmin	972350
ACTN4_HUMAN	O43707	O43707	ACTN4	Alpha-actinin-4	959520
PGS2_HUMAN	P07585	P07585	DCN	Decorin	959170
FBN1_HUMAN	P35555	P35555	FBN1	Fibrillin-1	912148
HEMO_HUMAN	P02790	P02790	HPX	Hemopexin	895822
HS71A_HUMAN;HS71B_HUMAN	P0DMV9;P0DMV8	P0DMV8;P0DMV9	HSPA1A;HSPA1B	Heat shock 70 kDa protein 1A	892286
IGLL5_HUMAN	P0CF74;P0DOY2;B9A064;A0M8Q6;P0CG04	B9A064	IGLL5	Immunoglobulin lambda-like polypeptide 5	881615
HSP7C_HUMAN	P11142;P54652	P11142	HSPA8	Heat shock cognate 71 kDa protein	877862
EMIL1_HUMAN	Q9Y6C2	Q9Y6C2	EMILIN1	EMILIN-1	877848
H2B3B_HUMAN	Q8N257	Q8N257	H2BC26	Histone H2B type 3-B	867484
PRDX2_HUMAN	P32119	P32119	PRDX2	Peroxiredoxin-2	863647
SBP1_HUMAN	Q13228	Q13228	SELENBP1	Methanethiol oxidase	807494
BIP_HUMAN	P11021	P11021	HSPA5	Endoplasmic reticulum chaperone BiP	792638
COLA1_HUMAN	Q96P44	Q96P44	COL21A1	Collagen alpha-1(XXI) chain	757915
AACT_HUMAN	P01011	P01011	SERPINA3	Alpha-1-antichymotrypsin	753868
HS90B_HUMAN	P08238	P08238	HSP90AB1	Heat shock protein HSP 90-beta	752675
FIBG_HUMAN	P02679	P02679	FGG	Fibrinogen gamma chain	742557
H33_HUMAN	P84243;Q71DI3;P68431;Q6NXT2;Q16695	P84243	H3-3B	Histone H3.3	739685
LEG3_HUMAN	P17931	P17931	LGALS3	Galectin-3	739154
HP1B3_HUMAN	Q5SSJ5	Q5SSJ5	HP1BP3	Heterochromatin protein 1-binding protein 3	734808
FIBA_HUMAN	P02671	P02671	FGA	Fibrinogen alpha chain	729796
HS90A_HUMAN	P07900	P07900	HSP90AA1	Heat shock protein HSP 90-alpha	723194
HSPB6_HUMAN	O14558	O14558	HSPB6	Heat shock protein beta-6	718161
VINC_HUMAN	P18206	P18206	VCL	Vinculin	712068
ATPA_HUMAN	P25705	P25705	ATP5F1A	ATP synthase subunit alpha, mitochondrial	706970
PPIB_HUMAN	P23284	P23284	PPIB	Peptidyl-prolyl cis-trans isomerase B	691544
A1AG1_HUMAN	P02763	P02763	ORM1	Alpha-1-acid glycoprotein 1	686952
LDHA_HUMAN	P00338	P00338	LDHA	L-lactate dehydrogenase A chain	663407
ACTBL_HUMAN	Q562R1	Q562R1	ACTBL2	Beta-actin-like protein 2	649964
COF1_HUMAN	Q9Y281;P23528	P23528	CFL1	Cofilin-1	645336
RINI_HUMAN	P13489	P13489	RNH1	Ribonuclease inhibitor	642600
HSP76_HUMAN	P48741;P17066	P17066	HSPA6	Heat shock 70 kDa protein 6	638027
TPM1_HUMAN	P09493	P09493	TPM1	Tropomyosin alpha-1 chain	633169
TPIS_HUMAN	P60174	P60174	TPI1	Triosephosphate isomerase	623464
AMBP_HUMAN	P02760	P02760	AMBP	Protein AMBP	615804
PRDX5_HUMAN	P30044	P30044	PRDX5	Peroxiredoxin-5, mitochondrial	613155
ANT3_HUMAN	P01008	P01008	SERPINC1	Antithrombin-III	606336
PDIA3_HUMAN	P30101	P30101	PDIA3	Protein disulfide-isomerase A3	598568
CAH1_HUMAN	P00915	P00915	CA1	Carbonic anhydrase 1	581404
DX39B_HUMAN	Q13838;O00148	Q13838	DDX39B	Spliceosome RNA helicase DDX39B	580360
LMNB2_HUMAN	Q03252	Q03252	LMNB2	Lamin-B2	563376
ANXA6_HUMAN	P08133	P08133	ANXA6	Annexin A6	561800
DERM_HUMAN	Q07507	Q07507	DPT	Dermatopontin	560650
EF1G_HUMAN	P26641	P26641	EEF1G	Elongation factor 1-gamma	550604
CALD1_HUMAN	Q05682	Q05682	CALD1	Caldesmon	548792
VTNC_HUMAN	P04004	P04004	VTN	Vitronectin	545861
GNAI2_HUMAN	P04899	P04899	GNAI2	Guanine nucleotide-binding protein G(i) subunit alpha-2	544412
TAGL2_HUMAN	P37802	P37802	TAGLN2	Transgelin-2	538402
IDHP_HUMAN	P48735	P48735	IDH2	Isocitrate dehydrogenase [NADP], mitochondrial	521770
IF4A1_HUMAN	P60842	P60842	EIF4A1	Eukaryotic initiation factor 4A-I	521084
A2MG_HUMAN	P20742;P01023	P01023	A2M	Alpha-2-macroglobulin	513316
ADT2_HUMAN	P05141;P12236;P12235;Q9H0C2	P05141	SLC25A5	ADP/ATP translocase 2	508836
PGBM_HUMAN	P98160	P98160	HSPG2	Basement membrane-specific heparan sulfate proteoglycan core protein	505940
AHNK_HUMAN	Q09666	Q09666	AHNAK	Neuroblast differentiation-associated protein AHNAK	503111
HV307_HUMAN	P01780	P01780	IGHV3-7	Immunoglobulin heavy variable 3-7	501788
DYHC1_HUMAN	Q14204	Q14204	DYNC1H1	Cytoplasmic dynein 1 heavy chain 1	485068
H2A2B_HUMAN	P0C0S8;P04908;Q6FI13;P20671;Q9BTM1;Q96QV6;Q99878;Q7L7L0;Q8IUE6;P16104;Q93077;Q16777;Q96KK5	Q8IUE6	H2AC21	Histone H2A type 2-B	483340
ROA1_HUMAN	A0A2R8Y4L2;P09651	P09651	HNRNPA1	Heterogeneous nuclear ribonucleoprotein A1	482768
PGAM1_HUMAN	P18669	P18669	PGAM1	Phosphoglycerate mutase 1	473627
PGS1_HUMAN	P21810	P21810	BGN	Biglycan	460656
RAC1_HUMAN	P15153;P60763;P63000	P63000	RAC1	Ras-related C3 botulinum toxin substrate 1	452061
RL13_HUMAN	P26373	P26373	RPL13	Large ribosomal subunit protein eL13	451568
CNN1_HUMAN	P51911	P51911	CNN1	Calponin-1	444994
PRELP_HUMAN	P51888	P51888	PRELP	Prolargin	439166
ML12A_HUMAN;ML12B_HUMAN	P19105;O14950	O14950;P19105	MYL12A;MYL12B	Myosin regulatory light chain 12B	437334
KV37_HUMAN	A0A075B6H7;A0A0C4DH90;A0A0C4DH55;P01624	A0A075B6H7	IGKV3-7	Probable non-functional immunoglobulin kappa variable 3-7	436875
RET1_HUMAN	P09455	P09455	RBP1	Retinol-binding protein 1	432554
NONO_HUMAN	Q15233	Q15233	NONO	Non-POU domain-containing octamer-binding protein	432429
PGRC1_HUMAN	O00264	O00264	PGRMC1	Membrane-associated progesterone receptor component 1	431334
COX2_HUMAN	P00403	P00403	MT-CO2	Cytochrome c oxidase subunit 2	430843
SRSF3_HUMAN	P84103	P84103	SRSF3	Serine/arginine-rich splicing factor 3	428667
MIF_HUMAN	P14174	P14174	MIF	Macrophage migration inhibitory factor	426538
ALDOA_HUMAN	P04075	P04075	ALDOA	Fructose-bisphosphate aldolase A	425256
B3AT_HUMAN	P02730	P02730	SLC4A1	Band 3 anion transport protein	421085
EHD2_HUMAN	Q9NZN4	Q9NZN4	EHD2	EH domain-containing protein 2	420654
TAGL_HUMAN	Q01995	Q01995	TAGLN	Transgelin	418690
RACK1_HUMAN	P63244	P63244	RACK1	Small ribosomal subunit protein RACK1	417042
EF2_HUMAN	P13639	P13639	EEF2	Elongation factor 2	414824
CLUS_HUMAN	P10909	P10909	CLU	Clusterin	413850
PLEC_HUMAN	Q15149	Q15149	PLEC	Plectin	411382
GANAB_HUMAN	Q14697	Q14697	GANAB	Neutral alpha-glucosidase AB	403950
CLH1_HUMAN	P53675;Q00610	Q00610	CLTC	Clathrin heavy chain 1	402196
IGHM_HUMAN	P01871	P01871	IGHM	Immunoglobulin heavy constant mu	401732
PGK1_HUMAN	P00558	P00558	PGK1	Phosphoglycerate kinase 1	399936
CATD_HUMAN	P07339	P07339	CTSD	Cathepsin D	397042
COIA1_HUMAN	P39060	P39060	COL18A1	Collagen alpha-1(XVIII) chain	396477
MDHC_HUMAN	P40925	P40925	MDH1	Malate dehydrogenase, cytoplasmic	396026
BGH3_HUMAN	Q15582	Q15582	TGFBI	Transforming growth factor-beta-induced protein ig-h3	394132
TKT_HUMAN	P29401	P29401	TKT	Transketolase	386626
RS9_HUMAN	P46781	P46781	RPS9	Small ribosomal subunit protein uS4	386112
SRSF6_HUMAN	Q13247	Q13247	SRSF6	Serine/arginine-rich splicing factor 6	382918
HNRPU_HUMAN	Q00839	Q00839	HNRNPU	Heterogeneous nuclear ribonucleoprotein U	377080
S25A3_HUMAN	Q00325	Q00325	SLC25A3	Solute carrier family 25 member 3	371968
PEBP1_HUMAN	P30086	P30086	PEBP1	Phosphatidylethanolamine-binding protein 1	369956
AOC3_HUMAN	Q16853	Q16853	AOC3	Membrane primary amine oxidase	369824
H2AY_HUMAN	O75367	O75367	MACROH2A1	Core histone macro-H2A.1	367970
H2AV_HUMAN;H2AZ_HUMAN	P0C0S5;Q71UI9	P0C0S5;Q71UI9	H2AZ1;H2AZ2	Histone H2A.Z	362626
IC1_HUMAN	P05155	P05155	SERPING1	Plasma protease C1 inhibitor	362464
STOM_HUMAN	P27105	P27105	STOM	Stomatin	361034
UBA1_HUMAN	P22314	P22314	UBA1	Ubiquitin-like modifier-activating enzyme 1	358608
LASP1_HUMAN	Q14847	Q14847	LASP1	LIM and SH3 domain protein 1	356868
CLIC1_HUMAN	O00299	O00299	CLIC1	Chloride intracellular channel protein 1	352706
S10A4_HUMAN	P26447	P26447	S100A4	Protein S100-A4	352578
NUCL_HUMAN	P19338	P19338	NCL	Nucleolin	351282
ARPC4_HUMAN	P59998	P59998	ARPC4	Actin-related protein 2/3 complex subunit 4	347924
A0A075B7B8_HUMAN	A0A075B7B8	A0A075B7B8	IGHV3OR16-12	Immunoglobulin heavy variable 3/OR16-12 (non-functional) (Fragment)	347698
KATL2_HUMAN	Q8IYT4	Q8IYT4	KATNAL2	Katanin p60 ATPase-containing subunit A-like 2	347350
CATA_HUMAN	P04040	P04040	CAT	Catalase	346032
SERPH_HUMAN	P50454	P50454	SERPINH1	Serpin H1	344712
GDIR1_HUMAN	P52565	P52565	ARHGDIA	Rho GDP-dissociation inhibitor 1	342920
HNRH1_HUMAN	P31943	P31943	HNRNPH1	Heterogeneous nuclear ribonucleoprotein H	342673
TCP4_HUMAN	P53999	P53999	SUB1	Activated RNA polymerase II transcriptional coactivator p15	340336
RAB7A_HUMAN	P51149	P51149	RAB7A	Ras-related protein Rab-7a	339632
HNRPC_HUMAN	P07910	P07910	HNRNPC	Heterogeneous nuclear ribonucleoproteins C1/C2	339622
RL27A_HUMAN	P46776	P46776	RPL27A	Large ribosomal subunit protein uL15	339018
HNRPK_HUMAN	P61978	P61978	HNRNPK	Heterogeneous nuclear ribonucleoprotein K	338308
KNG1_HUMAN	P01042	P01042	KNG1	Kininogen-1	335182
RL6_HUMAN	Q02878	Q02878	RPL6	Large ribosomal subunit protein eL6	333170
NB5R3_HUMAN	P00387	P00387	CYB5R3	NADH-cytochrome b5 reductase 3	332328
SMD3_HUMAN	P62318	P62318	SNRPD3	Small nuclear ribonucleoprotein Sm D3	327778
PSA1_HUMAN	P25786	P25786	PSMA1	Proteasome subunit alpha type-1	324920
PLSL_HUMAN	P13796	P13796	LCP1	Plastin-2	324026
TLN1_HUMAN	Q9Y490	Q9Y490	TLN1	Talin-1	323826
EFTU_HUMAN	P49411	P49411	TUFM	Elongation factor Tu, mitochondrial	321924
TBA4B_HUMAN	Q9H853	Q9H853	TUBA4B	Putative tubulin-like protein alpha-4B	319114
ITIH2_HUMAN	P19823	P19823	ITIH2	Inter-alpha-trypsin inhibitor heavy chain H2	318810
TERA_HUMAN	P55072	P55072	VCP	Transitional endoplasmic reticulum ATPase	318589
ARP2_HUMAN	P61160	P61160	ACTR2	Actin-related protein 2	317731
AMPL_HUMAN	P28838	P28838	LAP3	Cytosol aminopeptidase	316039
IPYR_HUMAN	Q15181	Q15181	PPA1	Inorganic pyrophosphatase	313215
IQGA1_HUMAN	P46940	P46940	IQGAP1	Ras GTPase-activating-like protein IQGAP1	307600
TBB6_HUMAN	Q9BUF5;Q13509	Q9BUF5	TUBB6	Tubulin beta-6 chain	306028
MYO1C_HUMAN	O00159	O00159	MYO1C	Unconventional myosin-Ic	305982
VTDB_HUMAN	P02774	P02774	GC	Vitamin D-binding protein	305865
RPN1_HUMAN	P04843	P04843	RPN1	Dolichyl-diphosphooligosaccharide--protein glycosyltransferase subunit 1	305656
PDLI1_HUMAN	O00151	O00151	PDLIM1	PDZ and LIM domain protein 1	304524
APT_HUMAN	P07741	P07741	APRT	Adenine phosphoribosyltransferase	304152
CBR1_HUMAN	P16152	P16152	CBR1	Carbonyl reductase [NADPH] 1	303865
MDHM_HUMAN	P40926	P40926	MDH2	Malate dehydrogenase, mitochondrial	303031
CO4A2_HUMAN	P08572	P08572	COL4A2	Collagen alpha-2(IV) chain	303012
DDX17_HUMAN	Q92841	Q92841	DDX17	Probable ATP-dependent RNA helicase DDX17	302608
ECHB_HUMAN	P55084	P55084	HADHB	Trifunctional enzyme subunit beta, mitochondrial	301356
STIP1_HUMAN	P31948	P31948	STIP1	Stress-induced-phosphoprotein 1	299804
NDKA_HUMAN	P15531	P15531	NME1	Nucleoside diphosphate kinase A	297684
GSTP1_HUMAN	P09211	P09211	GSTP1	Glutathione S-transferase P	297262
RSSA_HUMAN	A0A8I5KQE6;P08865	P08865	RPSA	Small ribosomal subunit protein uS2	296765
CH10_HUMAN	P61604	P61604	HSPE1	10 kDa heat shock protein, mitochondrial	291279
LAMC1_HUMAN	P11047	P11047	LAMC1	Laminin subunit gamma-1	290598
RL10A_HUMAN	P62906	P62906	RPL10A	Large ribosomal subunit protein uL1	288166
SPTB2_HUMAN	Q01082	Q01082	SPTBN1	Spectrin beta chain, non-erythrocytic 1	288160
TENX_HUMAN	P22105	P22105	TNXB	Tenascin-X	287986
SPB6_HUMAN	P35237	P35237	SERPINB6	Serpin B6	287501
DNPEP_HUMAN	Q9ULA0	Q9ULA0	DNPEP	Aspartyl aminopeptidase	283964
IGHG4_HUMAN	P01861	P01861	IGHG4	Immunoglobulin heavy constant gamma 4	282682
MYLK3_HUMAN	Q32MK0	Q32MK0	MYLK3	Myosin light chain kinase 3	281808
LYSC_HUMAN	P61626	P61626	LYZ	Lysozyme C	279962
PRDX3_HUMAN	P30048	P30048	PRDX3	Thioredoxin-dependent peroxide reductase, mitochondrial	279254
CO4A1_HUMAN	P02462;P29400	P02462	COL4A1	Collagen alpha-1(IV) chain	277958
PCBP1_HUMAN	Q15365	Q15365	PCBP1	Poly(rC)-binding protein 1	277566
MYL9_HUMAN	P24844	P24844	MYL9	Myosin regulatory light polypeptide 9	276218
APEX1_HUMAN	P27695	P27695	APEX1	DNA-(apurinic or apyrimidinic site) endonuclease	275162
PSA4_HUMAN	P25789	P25789	PSMA4	Proteasome subunit alpha type-4	274710
WDR1_HUMAN	O75083	O75083	WDR1	WD repeat-containing protein 1	273946
HNRPR_HUMAN	O43390	O43390	HNRNPR	Heterogeneous nuclear ribonucleoprotein R	273456
PTGIS_HUMAN	Q16647	Q16647	PTGIS	Prostacyclin synthase	272479
IGLC2_HUMAN	P0DOY3;P0DOY2	P0DOY2	IGLC2	Immunoglobulin lambda constant 2	272402
GRP75_HUMAN	P38646	P38646	HSPA9	Stress-70 protein, mitochondrial	271586
SPTN1_HUMAN	Q13813	Q13813	SPTAN1	Spectrin alpha chain, non-erythrocytic 1	271570
SRSF7_HUMAN	Q16629	Q16629	SRSF7	Serine/arginine-rich splicing factor 7	270486
ZYX_HUMAN	Q15942	Q15942	ZYX	Zyxin	269498
HLAB_HUMAN	P01889;P04439	P01889	HLA-B	HLA class I histocompatibility antigen, B alpha chain	268878
ROA3_HUMAN	P51991	P51991	HNRNPA3	Heterogeneous nuclear ribonucleoprotein A3	268776
PSB2_HUMAN	P49721	P49721	PSMB2	Proteasome subunit beta type-2	268653
LGUL_HUMAN	Q04760	Q04760	GLO1	Lactoylglutathione lyase	267548
APOA4_HUMAN	P06727	P06727	APOA4	Apolipoprotein A-IV	267194
RS28_HUMAN	P62857	P62857	RPS28	Small ribosomal subunit protein eS28	267034
VAT1_HUMAN	Q99536	Q99536	VAT1	Synaptic vesicle membrane protein VAT-1 homolog	266320
ATPO_HUMAN	P48047	P48047	ATP5PO	ATP synthase subunit O, mitochondrial	266270
XRCC5_HUMAN	P13010	P13010	XRCC5	X-ray repair cross-complementing protein 5	266174
RTN4_HUMAN	Q9NQC3	Q9NQC3	RTN4	Reticulon-4	265942
HMGB1_HUMAN	P09429;P26583	P09429	HMGB1	High mobility group protein B1	265916
SRSF2_HUMAN	Q01130	Q01130	SRSF2	Serine/arginine-rich splicing factor 2	264683
ALDH2_HUMAN	P05091;O94788	P05091	ALDH2	Aldehyde dehydrogenase, mitochondrial	262570
RAB1B_HUMAN	P62820;Q9H0U4	Q9H0U4	RAB1B	Ras-related protein Rab-1B	262361
LAMP2_HUMAN	P13473	P13473	LAMP2	Lysosome-associated membrane glycoprotein 2	262032
PRAF3_HUMAN	O75915	O75915	ARL6IP5	PRA1 family protein 3	260285
AT1A1_HUMAN	P05023	P05023	ATP1A1	Sodium/potassium-transporting ATPase subunit alpha-1	259844
RB11B_HUMAN	P62491;Q15907	Q15907	RAB11B	Ras-related protein Rab-11B	259594
RS18_HUMAN	P62269	P62269	RPS18	Small ribosomal subunit protein uS13	258108
RS3_HUMAN	P23396	P23396	RPS3	Small ribosomal subunit protein uS3	257221
ANXA1_HUMAN	P04083	P04083	ANXA1	Annexin A1	256075
PHB1_HUMAN	P35232	P35232	PHB1	Prohibitin 1	255916
KCD12_HUMAN	Q96CX2	Q96CX2	KCTD12	BTB/POZ domain-containing protein KCTD12	255802
IMB1_HUMAN	Q14974	Q14974	KPNB1	Importin subunit beta-1	255756
IDHC_HUMAN	O75874	O75874	IDH1	Isocitrate dehydrogenase [NADP] cytoplasmic	254046
LAMB2_HUMAN	P55268	P55268	LAMB2	Laminin subunit beta-2	252446
PSME1_HUMAN	Q06323	Q06323	PSME1	Proteasome activator complex subunit 1	251665
ARPC3_HUMAN	O15145	O15145	ARPC3	Actin-related protein 2/3 complex subunit 3	251264
XRCC6_HUMAN	P12956	P12956	XRCC6	X-ray repair cross-complementing protein 6	250299
OST48_HUMAN	P39656	P39656	DDOST	Dolichyl-diphosphooligosaccharide--protein glycosyltransferase 48 kDa subunit	249971
PGM1_HUMAN	P36871	P36871	PGM1	Phosphoglucomutase-1	248988
MYADM_HUMAN	Q96S97	Q96S97	MYADM	Myeloid-associated differentiation marker	248932
CAVN1_HUMAN	Q6NZI2	Q6NZI2	CAVIN1	Caveolae-associated protein 1	248628
RS6_HUMAN	P62753	P62753	RPS6	Small ribosomal subunit protein eS6	247595
HNRPD_HUMAN	Q14103	Q14103	HNRNPD	Heterogeneous nuclear ribonucleoprotein D0	246636
C1QC_HUMAN	P02747	P02747	C1QC	Complement C1q subcomponent subunit C	246318
GDIB_HUMAN	P50395	P50395	GDI2	Rab GDP dissociation inhibitor beta	246162
CSRP1_HUMAN	P21291	P21291	CSRP1	Cysteine and glycine-rich protein 1	245752
SAHH_HUMAN	P23526	P23526	AHCY	Adenosylhomocysteinase	245410
CH60_HUMAN	P10809	P10809	HSPD1	60 kDa heat shock protein, mitochondrial	244785
KCRB_HUMAN	P12277	P12277	CKB	Creatine kinase B-type	244350
MATR3_HUMAN	P43243	P43243	MATR3	Matrin-3	244094
EMD_HUMAN	P50402	P50402	EMD	Emerin	244034
APOE_HUMAN	P02649	P02649	APOE	Apolipoprotein E	243918
EF1D_HUMAN	P29692	P29692	EEF1D	Elongation factor 1-delta	243390
AATM_HUMAN	P00505	P00505	GOT2	Aspartate aminotransferase, mitochondrial	242941
AL1A2_HUMAN	O94788	O94788	ALDH1A2	Retinal dehydrogenase 2	242890
SET_HUMAN	P0DME0;Q01105	Q01105	SET	Protein SET	242287
GBB2_HUMAN	P16520;P62873;P62879	P62879	GNB2	Guanine nucleotide-binding protein G(I)/G(S)/G(T) subunit beta-2	242094
MYLK_HUMAN	Q15746	Q15746	MYLK	Myosin light chain kinase, smooth muscle	241704
CAN1_HUMAN	P07384	P07384	CAPN1	Calpain-1 catalytic subunit	241008
KVD20_HUMAN	A0A0C4DH25	A0A0C4DH25	IGKV3D-20	Immunoglobulin kappa variable 3D-20	240360
RL7_HUMAN	P18124	P18124	RPL7	Large ribosomal subunit protein uL30	240256
DPYL2_HUMAN	Q16555	Q16555	DPYSL2	Dihydropyrimidinase-related protein 2	239651
ARF4_HUMAN	P18085	P18085	ARF4	ADP-ribosylation factor 4	239278
SAMP_HUMAN	P02743	P02743	APCS	Serum amyloid P-component	235732
KAD3_HUMAN	Q9UIJ7	Q9UIJ7	AK3	GTP:AMP phosphotransferase AK3, mitochondrial	235412
DDAH2_HUMAN	O95865	O95865	DDAH2	N(G),N(G)-dimethylarginine dimethylaminohydrolase 2	234898
PHB2_HUMAN	Q99623	Q99623	PHB2	Prohibitin-2	233999
RL14_HUMAN	P50914	P50914	RPL14	Large ribosomal subunit protein eL14	233609
OLFL1_HUMAN	Q6UWY5	Q6UWY5	OLFML1	Olfactomedin-like protein 1	231658
KV401_HUMAN	P06312	P06312	IGKV4-1	Immunoglobulin kappa variable 4-1	230244
RS14_HUMAN	P62263	P62263	RPS14	Small ribosomal subunit protein uS11	227962
SODE_HUMAN	P08294	P08294	SOD3	Extracellular superoxide dismutase [Cu-Zn]	225925
SH3L1_HUMAN	O75368	O75368	SH3BGRL	Adapter SH3BGRL	225896
RL35A_HUMAN	P18077	P18077	RPL35A	Large ribosomal subunit protein eL33	225009
ZZEF1_HUMAN	O43149	O43149	ZZEF1	Zinc finger ZZ-type and EF-hand domain-containing protein 1	225006
RS15A_HUMAN	P62244	P62244	RPS15A	Small ribosomal subunit protein uS8	224945
CFAB_HUMAN	P00751	P00751	CFB	Complement factor B	223941
ATPG_HUMAN	P36542	P36542	ATP5F1C	ATP synthase subunit gamma, mitochondrial	223628
DEST_HUMAN	P60981	P60981	DSTN	Destrin	222870
CAZA1_HUMAN	P52907;P47755	P52907	CAPZA1	F-actin-capping protein subunit alpha-1	222755
CNDP2_HUMAN	Q96KP4	Q96KP4	CNDP2	Cytosolic non-specific dipeptidase	222009
GSTO1_HUMAN	P78417	P78417	GSTO1	Glutathione S-transferase omega-1	221826
TIF1B_HUMAN	Q13263	Q13263	TRIM28	Transcription intermediary factor 1-beta	221580
RAP1A_HUMAN	P62834;P61224	P62834	RAP1A	Ras-related protein Rap-1A	221318
ZA2G_HUMAN	P25311	P25311	AZGP1	Zinc-alpha-2-glycoprotein	220966
HLAG_HUMAN	P17693	P17693	HLA-G	HLA class I histocompatibility antigen, alpha chain G	220804
TPM3_HUMAN	P06753	P06753	TPM3	Tropomyosin alpha-3 chain	218496
PGK2_HUMAN	P07205	P07205	PGK2	Phosphoglycerate kinase 2	216976
AL9A1_HUMAN	P49189	P49189	ALDH9A1	4-trimethylaminobutyraldehyde dehydrogenase	215824
FUBP2_HUMAN	Q92945	Q92945	KHSRP	Far upstream element-binding protein 2	215424
ESTD_HUMAN	P10768	P10768	ESD	S-formylglutathione hydrolase	215162
INO1_HUMAN	Q9NPH2	Q9NPH2	ISYNA1	Inositol-3-phosphate synthase 1	215109
KV228_HUMAN;KVD28_HUMAN	A0A075B6P5;P01615	A0A075B6P5;P01615	IGKV2-28;IGKV2D-28	Immunoglobulin kappa variable 2-28	214474
HNRPM_HUMAN	P52272	P52272	HNRNPM	Heterogeneous nuclear ribonucleoprotein M	214026
HYEP_HUMAN	P07099	P07099	EPHX1	Epoxide hydrolase 1	213366
CALX_HUMAN	P27824	P27824	CANX	Calnexin	212968
CERU_HUMAN	P00450	P00450	CP	Ceruloplasmin	211598
ACTN1_HUMAN	P12814;P35609	P12814	ACTN1	Alpha-actinin-1	211146
FRIL_HUMAN	P02792	P02792	FTL	Ferritin light chain	210700
MVP_HUMAN	Q14764	Q14764	MVP	Major vault protein	210680
PARK7_HUMAN	Q99497	Q99497	PARK7	Parkinson disease protein 7	210510
RL15_HUMAN	P61313	P61313	RPL15	Large ribosomal subunit protein eL15	210319
AL7A1_HUMAN	P49419	P49419	ALDH7A1	Alpha-aminoadipic semialdehyde dehydrogenase	209936
TTHY_HUMAN	P02766	P02766	TTR	Transthyretin	209636
PDIA1_HUMAN	P07237	P07237	P4HB	Protein disulfide-isomerase	209626
LMNB1_HUMAN	P20700	P20700	LMNB1	Lamin-B1	209571
FUS_HUMAN	P35637	P35637	FUS	RNA-binding protein FUS	208976
RLA2_HUMAN	P05387	P05387	RPLP2	Large ribosomal subunit protein P2	207497
LAP2A_HUMAN	P42166	P42166	TMPO	Lamina-associated polypeptide 2, isoform alpha	204696
CPNE3_HUMAN	O75131	O75131	CPNE3	Copine-3	204060
RAB15_HUMAN	P59190	P59190	RAB15	Ras-related protein Rab-15	204042
RL18_HUMAN	Q07020	Q07020	RPL18	Large ribosomal subunit protein eL18	203947
6PGL_HUMAN	O95336	O95336	PGLS	6-phosphogluconolactonase	203299
SORCN_HUMAN	P30626	P30626	SRI	Sorcin	202666
LV147_HUMAN	P01700	P01700	IGLV1-47	Immunoglobulin lambda variable 1-47	202475
RAN_HUMAN	P62826	P62826	RAN	GTP-binding nuclear protein Ran	200148
TCPQ_HUMAN	P50990	P50990	CCT8	T-complex protein 1 subunit theta	199815
DAD1_HUMAN	P61803	P61803	DAD1	Dolichyl-diphosphooligosaccharide--protein glycosyltransferase subunit DAD1	199637
DEF1_HUMAN;DEF3_HUMAN	P59666;P59665	P59665;P59666	DEFA1B;DEFA3	Neutrophil defensin 1	199414
NPM_HUMAN	P06748	P06748	NPM1	Nucleophosmin	198294
SND1_HUMAN	Q7KZF4	Q7KZF4	SND1	Staphylococcal nuclease domain-containing protein 1	197389
DCD_HUMAN	P81605	P81605	DCD	Dermcidin	196762
RL8_HUMAN	P62917	P62917	RPL8	Large ribosomal subunit protein uL2	194841
QCR1_HUMAN	P31930	P31930	UQCRC1	Cytochrome b-c1 complex subunit 1, mitochondrial	194744
SODM_HUMAN	P04179	P04179	SOD2	Superoxide dismutase [Mn], mitochondrial	192454
CAND1_HUMAN	Q86VP6	Q86VP6	CAND1	Cullin-associated NEDD8-dissociated protein 1	191858
TCPG_HUMAN	P49368	P49368	CCT3	T-complex protein 1 subunit gamma	191161
HV315_HUMAN	A0A0B4J1V0	A0A0B4J1V0	IGHV3-15	Immunoglobulin heavy variable 3-15	191087
RS25_HUMAN	P62851	P62851	RPS25	Small ribosomal subunit protein eS25	190922
VPS35_HUMAN	Q96QK1	Q96QK1	VPS35	Vacuolar protein sorting-associated protein 35	190880
FBRL_HUMAN	P22087	P22087	FBL	rRNA 2'-O-methyltransferase fibrillarin	190746
RL31_HUMAN	P62899	P62899	RPL31	Large ribosomal subunit protein eL31	190641
TENS1_HUMAN	Q9HBL0	Q9HBL0	TNS1	Tensin-1	190436
FRIH_HUMAN	P02794	P02794	FTH1	Ferritin heavy chain	189358
SAMH1_HUMAN	Q9Y3Z3	Q9Y3Z3	SAMHD1	Deoxynucleoside triphosphate triphosphohydrolase SAMHD1	189291
GBG12_HUMAN	Q9UBI6	Q9UBI6	GNG12	Guanine nucleotide-binding protein G(I)/G(S)/G(O) subunit gamma-12	188657
GET3_HUMAN	O43681	O43681	GET3	ATPase GET3	188540
CYBR1_HUMAN	Q53TN4	Q53TN4	CYBRD1	Plasma membrane ascorbate-dependent reductase CYBRD1	188236
CFAH_HUMAN	P08603	P08603	CFH	Complement factor H	188145
AK1A1_HUMAN	P14550	P14550	AKR1A1	Aldo-keto reductase family 1 member A1	185680
RLA1_HUMAN	P05386	P05386	RPLP1	Large ribosomal subunit protein P1	184902
TCPA_HUMAN	P17987	P17987	TCP1	T-complex protein 1 subunit alpha	184359
1433G_HUMAN	P61981	P61981	YWHAG	14-3-3 protein gamma	183516
SSBP_HUMAN	Q04837	Q04837	SSBP1	Single-stranded DNA-binding protein, mitochondrial	182437
C4BPA_HUMAN	P04003	P04003	C4BPA	C4b-binding protein alpha chain	180888
A1BG_HUMAN	P04217	P04217	A1BG	Alpha-1B-glycoprotein	180478
APOA2_HUMAN	P02652	P02652	APOA2	Apolipoprotein A-II	180234
COPA_HUMAN	P53621	P53621	COPA	Coatomer subunit alpha	180200
1433B_HUMAN	P31946	P31946	YWHAB	14-3-3 protein beta/alpha	179932
RPN2_HUMAN	P04844	P04844	RPN2	Dolichyl-diphosphooligosaccharide--protein glycosyltransferase subunit 2	178607
RBMX_HUMAN	P38159;Q96E39	P38159	RBMX	RNA-binding motif protein, X chromosome	177736
MK01_HUMAN	P28482	P28482	MAPK1	Mitogen-activated protein kinase 1	177332
BCAM_HUMAN	P50895	P50895	BCAM	Basal cell adhesion molecule	177136
DPYL3_HUMAN	Q14195	Q14195	DPYSL3	Dihydropyrimidinase-related protein 3	176904
RS26_HUMAN	Q5JNZ5;P62854	P62854	RPS26	Small ribosomal subunit protein eS26	176789
ACON_HUMAN	Q99798	Q99798	ACO2	Aconitate hydratase, mitochondrial	175919
RS16_HUMAN	P62249	P62249	RPS16	Small ribosomal subunit protein uS9	175553
HNRH3_HUMAN	P31942	P31942	HNRNPH3	Heterogeneous nuclear ribonucleoprotein H3	174854
SEPT2_HUMAN	Q15019	Q15019	SEPTIN2	Septin-2	173780
TBA1C_HUMAN	P68363;Q9BQE3;Q71U36	Q9BQE3	TUBA1C	Tubulin alpha-1C chain	173528
DHX9_HUMAN	Q08211	Q08211	DHX9	ATP-dependent RNA helicase A	173027
ARPC2_HUMAN	O15144	O15144	ARPC2	Actin-related protein 2/3 complex subunit 2	172146
H2B1A_HUMAN	Q96A08	Q96A08	H2BC1	Histone H2B type 1-A	171991
STT3A_HUMAN	P46977	P46977	STT3A	Dolichyl-diphosphooligosaccharide--protein glycosyltransferase subunit STT3A	171254
APOB_HUMAN	P04114	P04114	APOB	Apolipoprotein B-100	171230
OLFL3_HUMAN	Q9NRN5	Q9NRN5	OLFML3	Olfactomedin-like protein 3	171092
ARF1_HUMAN;ARF3_HUMAN	P61204;P84077	P61204;P84077	ARF1;ARF3	ADP-ribosylation factor 3	171077
ARP3_HUMAN	P61158	P61158	RPS2	Actin-related protein 3	170632
RS2_HUMAN	P15880	P15880	ACTR3	Small ribosomal subunit protein uS5	170632
KANK2_HUMAN	Q5T7N3;Q63ZY3	Q63ZY3	KANK2	KN motif and ankyrin repeat domain-containing protein 2	169678
UB2V1_HUMAN	Q13404	Q13404	UBE2V1	Ubiquitin-conjugating enzyme E2 variant 1	169650
RS4X_HUMAN	P62701;Q8TD47	P62701	RPS4X	Small ribosomal subunit protein eS4, X isoform	169372
TCPB_HUMAN	P78371	P78371	CCT2	T-complex protein 1 subunit beta	169275
THIL_HUMAN	P24752	P24752	ACAT1	Acetyl-CoA acetyltransferase, mitochondrial	169200
RL22_HUMAN	P35268	P35268	RPL22	Large ribosomal subunit protein eL22	168649
AOFB_HUMAN	P27338	P27338	MAOB	Amine oxidase [flavin-containing] B	168437
PRKDC_HUMAN	P78527	P78527	PRKDC	DNA-dependent protein kinase catalytic subunit	168348
ESYT1_HUMAN	Q9BSJ8	Q9BSJ8	ESYT1	Extended synaptotagmin-1	168031
SFPQ_HUMAN	P23246	P23246	SFPQ	Splicing factor, proline- and glutamine-rich	167939
OTUB1_HUMAN	Q96FW1	Q96FW1	OTUB1	Ubiquitin thioesterase OTUB1	166692
AP2S1_HUMAN	P53680	P53680	AP2S1	AP-2 complex subunit sigma	166156
PP2AA_HUMAN	P67775;P62714	P67775	PPP2CA	Serine/threonine-protein phosphatase 2A catalytic subunit alpha isoform	165813
LEMD2_HUMAN	Q8NC56	Q8NC56	LEMD2	LEM domain-containing protein 2	165522
ODO2_HUMAN	P36957	P36957	DLST	Dihydrolipoyllysine-residue succinyltransferase component of 2-oxoglutarate dehydrogenase complex, mitochondrial	165274
VDAC2_HUMAN	P45880	P45880	VDAC2	Voltage-dependent anion-selective channel protein 2	164921
PDCD4_HUMAN	Q53EL6	Q53EL6	PDCD4	Programmed cell death protein 4	164368
ANM1_HUMAN	Q99873	Q99873	PRMT1	Protein arginine N-methyltransferase 1	164025
GDIA_HUMAN	P31150	P31150	GDI1	Rab GDP dissociation inhibitor alpha	163792
PDIA6_HUMAN	Q15084	Q15084	PDIA6	Protein disulfide-isomerase A6	163599
G6PI_HUMAN	P06744	P06744	GPI	Glucose-6-phosphate isomerase	163443
COR1B_HUMAN	Q9BR76	Q9BR76	CORO1B	Coronin-1B	163121
IF4A3_HUMAN	P38919	P38919	EIF4A3	Eukaryotic initiation factor 4A-III	162812
UBE2N_HUMAN	P61088	P61088	UBE2N	Ubiquitin-conjugating enzyme E2 N	162275
CALR_HUMAN	P27797	P27797	CALR	Calreticulin	162155
ANXA7_HUMAN	P20073	P20073	ANXA7	Annexin A7	161454
FETUA_HUMAN	P02765	P02765	AHSG	Alpha-2-HS-glycoprotein	161388
HRG_HUMAN	P04196	P04196	HRG	Histidine-rich glycoprotein	161314
COCA1_HUMAN	Q99715	Q99715	COL12A1	Collagen alpha-1(XII) chain	161011
CUTA_HUMAN	O60888	O60888	CUTA	Protein CutA	160918
RS8_HUMAN	P62241	P62241	RPS8	Small ribosomal subunit protein eS8	160228
5NTD_HUMAN	P21589	P21589	NT5E	5'-nucleotidase	159556
SAP_HUMAN	P07602	P07602	PSAP	Prosaposin	159232
S10A9_HUMAN	P06702	P06702	S100A9	Protein S100-A9	158998
PYGB_HUMAN	P06737;P11217;P11216	P11216	PYGB	Glycogen phosphorylase, brain form	158724
ITB6_HUMAN	P18564	P18564	ITGB6	Integrin beta-6	158688
ELAV1_HUMAN	Q15717	Q15717	ELAVL1	ELAV-like protein 1	158504
PCBP2_HUMAN	Q15366	Q15366	PCBP2	Poly(rC)-binding protein 2	157779
GIMA4_HUMAN	Q9NUV9	Q9NUV9	GIMAP4	GTPase IMAP family member 4	156690
COPB2_HUMAN	P35606	P35606	COPB2	Coatomer subunit beta'	156036
ETFB_HUMAN	P38117	P38117	ETFB	Electron transfer flavoprotein subunit beta	155821
CISY_HUMAN	O75390	O75390	CS	Citrate synthase, mitochondrial	155632
H15_HUMAN	P16401	P16401	H1-5	Histone H1.5	155176
RLA0_HUMAN	P05388	P05388	RPLP0	Large ribosomal subunit protein uL10	154984
FRITZ_HUMAN	O95876	O95876	WDPCP	WD repeat-containing and planar cell polarity effector protein fritz homolog	154942
A2GL_HUMAN	P02750	P02750	LRG1	Leucine-rich alpha-2-glycoprotein	154766
PTK7_HUMAN	Q13308	Q13308	PTK7	Inactive tyrosine-protein kinase 7	154676
FKBP2_HUMAN	P26885	P26885	FKBP2	Peptidyl-prolyl cis-trans isomerase FKBP2	153134
CAPZB_HUMAN	P47756	P47756	CAPZB	F-actin-capping protein subunit beta	152902
SMD2_HUMAN	P62316	P62316	SNRPD2	Small nuclear ribonucleoprotein Sm D2	152892
MLEC_HUMAN	Q14165	Q14165	MLEC	Malectin	152466
CO8G_HUMAN	P07360	P07360	C8G	Complement component C8 gamma chain	152059
RHG01_HUMAN	Q07960	Q07960	ARHGAP1	Rho GTPase-activating protein 1	151798
ABHEB_HUMAN	Q96IU4	Q96IU4	ABHD14B	Putative protein-lysine deacylase ABHD14B	151506
LG3BP_HUMAN	Q08380	Q08380	LGALS3BP	Galectin-3-binding protein	151329
PA2G4_HUMAN	Q9UQ80	Q9UQ80	PA2G4	Proliferation-associated protein 2G4	151010
ADHX_HUMAN	P11766	P11766	ADH5	Alcohol dehydrogenase class-3	150762
MFAP2_HUMAN	P55001	P55001	MFAP2	Microfibrillar-associated protein 2	148950
CATB_HUMAN	P07858	P07858	CTSB	Cathepsin B	148613
1433T_HUMAN	P27348	P27348	YWHAQ	14-3-3 protein theta	147941
ODPA_HUMAN	P08559;P29803	P08559	PDHA1	Pyruvate dehydrogenase E1 component subunit alpha, somatic form, mitochondrial	147630
HCD2_HUMAN	Q99714	Q99714	HSD17B10	3-hydroxyacyl-CoA dehydrogenase type-2	147506
SRSF1_HUMAN	Q07955	Q07955	SRSF1	Serine/arginine-rich splicing factor 1	147240
API5_HUMAN	Q9BZZ5	Q9BZZ5	API5	Apoptosis inhibitor 5	147020
HNRDL_HUMAN	O14979	O14979	HNRNPDL	Heterogeneous nuclear ribonucleoprotein D-like	146186
NID1_HUMAN	P14543	P14543	NID1	Nidogen-1	146057
CPNS1_HUMAN	Q96L46;P04632	P04632	CAPNS1	Calpain small subunit 1	145771
GDIR2_HUMAN	P52566	P52566	ARHGDIB	Rho GDP-dissociation inhibitor 2	145314
CKAP4_HUMAN	Q07065	Q07065	CKAP4	Cytoskeleton-associated protein 4	145312
ACADV_HUMAN	P49748	P49748	ACADVL	Very long-chain specific acyl-CoA dehydrogenase, mitochondrial	144966
NAT10_HUMAN	Q9H0A0	Q9H0A0	NAT10	RNA cytidine acetyltransferase	144923
ATPK_HUMAN	P56134	P56134	ATP5MF	ATP synthase subunit f, mitochondrial	144180
ANXA4_HUMAN	P09525	P09525	ANXA4	Annexin A4	143547
ADH1B_HUMAN	P00325;P08319	P00325	ADH1B	All-trans-retinol dehydrogenase [NAD(+)] ADH1B	142380
PABP1_HUMAN	P11940;Q4VXU2	P11940	PABPC1	Polyadenylate-binding protein 1	142197
SH3L3_HUMAN	Q9H299	Q9H299	SH3BGRL3	SH3 domain-binding glutamic acid-rich-like protein 3	142152
SPON1_HUMAN	Q9HCB6	Q9HCB6	SPON1	Spondin-1	142067
TPP1_HUMAN	O14773	O14773	TPP1	Tripeptidyl-peptidase 1	141855
RS13_HUMAN	P62277	P62277	RPS13	Small ribosomal subunit protein uS15	141681
IF4H_HUMAN	Q15056	Q15056	EIF4H	Eukaryotic translation initiation factor 4H	141676
FABP5_HUMAN	Q01469	Q01469	FABP5	Fatty acid-binding protein 5	141528
NUMA1_HUMAN	Q14980	Q14980	NUMA1	Nuclear mitotic apparatus protein 1	141515
XPP3_HUMAN	Q9NQH7	Q9NQH7	XPNPEP3	Xaa-Pro aminopeptidase 3	141464
RL12_HUMAN	P30050	P30050	RPL12	Large ribosomal subunit protein uL11	141108
S10A8_HUMAN	P05109	P05109	S100A8	Protein S100-A8	141019
EP15R_HUMAN	Q9UBC2	Q9UBC2	EPS15L1	Epidermal growth factor receptor substrate 15-like 1	140362
RL4_HUMAN	P36578	P36578	RPL4	Large ribosomal subunit protein uL4	138991
AGRIN_HUMAN	O00468	O00468	AGRN	Agrin	138552
PPAC_HUMAN	P24666	P24666	ACP1	Low molecular weight phosphotyrosine protein phosphatase	138180
ANX11_HUMAN	P50995	P50995	ANXA11	Annexin A11	138040
LRC47_HUMAN	Q8N1G4	Q8N1G4	LRRC47	Leucine-rich repeat-containing protein 47	137372
CNPY2_HUMAN	Q9Y2B0	Q9Y2B0	CNPY2	Protein canopy homolog 2	137360
RAB5C_HUMAN	P20339;P61020;P51148	P51148	RAB5C	Ras-related protein Rab-5C	137170
PCYOX_HUMAN	Q9UHG3	Q9UHG3	PCYOX1	Prenylcysteine oxidase 1	136926
TXND5_HUMAN	Q8NBS9	Q8NBS9	TXNDC5	Thioredoxin domain-containing protein 5	136468
GNA11_HUMAN	P29992	P29992	GNA11	Guanine nucleotide-binding protein subunit alpha-11	136022
SARNP_HUMAN	P82979	P82979	SARNP	SAP domain-containing ribonucleoprotein	135372
S10AB_HUMAN	P31949	P31949	S100A11	Protein S100-A11	135242
BIEA_HUMAN	P53004	P53004	BLVRA	Biliverdin reductase A	134958
DRB1_HUMAN	P01911	P01911	HLA-DRB1	HLA class II histocompatibility antigen, DRB1 beta chain	134722
RL34_HUMAN	P49207	P49207	RPL34	Large ribosomal subunit protein eL34	134596
SNX2_HUMAN	Q13596;O60749	O60749	SNX2	Sorting nexin-2	134158
U2AF1_HUMAN	Q01081	Q01081	U2AF1	Splicing factor U2AF 35 kDa subunit	133858
NDUAD_HUMAN	Q9P0J0	Q9P0J0	NDUFA13	NADH dehydrogenase [ubiquinone] 1 alpha subcomplex subunit 13	133689
KAP2_HUMAN	P13861	P13861	PRKAR2A	cAMP-dependent protein kinase type II-alpha regulatory subunit	133666
COX5A_HUMAN	P20674	P20674	COX5A	Cytochrome c oxidase subunit 5A, mitochondrial	133460
GTR1_HUMAN	P11166	P11166	SLC2A1	Solute carrier family 2, facilitated glucose transporter member 1	133112
BLVRB_HUMAN	P30043	P30043	BLVRB	Flavin reductase (NADPH)	132418
SCMC1_HUMAN	Q6NUK1	Q6NUK1	SLC25A24	Mitochondrial adenyl nucleotide antiporter SLC25A24	131918
CAPG_HUMAN	P40121	P40121	CAPG	Macrophage-capping protein	131421
PDLI7_HUMAN	Q9NR12	Q9NR12	PDLIM7	PDZ and LIM domain protein 7	130988
BAF_HUMAN	O75531	O75531	BANF1	Barrier-to-autointegration factor	130124
PHS_HUMAN	P61457	P61457	PCBD1	Pterin-4-alpha-carbinolamine dehydratase	130084
PA1B3_HUMAN	Q15102	Q15102	PAFAH1B3	Platelet-activating factor acetylhydrolase IB subunit alpha1	129746
G6PD_HUMAN	P11413	P11413	G6PD	Glucose-6-phosphate 1-dehydrogenase	129496
PARP1_HUMAN	P09874	P09874	PARP1	Poly [ADP-ribose] polymerase 1	129198
AT5F1_HUMAN	P24539	P24539	ATP5PB	ATP synthase F(0) complex subunit B1, mitochondrial	129002
RAB10_HUMAN	P61026	P61026	RAB10	Ras-related protein Rab-10	128632
ALDR_HUMAN	P15121	P15121	AKR1B1	Aldo-keto reductase family 1 member B1	128508
PRAF2_HUMAN	O60831	O60831	PRAF2	PRA1 family protein 2	128276
LAMA5_HUMAN	O15230	O15230	LAMA5	Laminin subunit alpha-5	127938
ITIH1_HUMAN	P19827	P19827	ITIH1	Inter-alpha-trypsin inhibitor heavy chain H1	127820
PML_HUMAN	P29590	P29590	PML	Protein PML	127700
CAZA2_HUMAN	P47755	P47755	CAPZA2	F-actin-capping protein subunit alpha-2	127630
RUXE_HUMAN	P62304	P62304	SNRPE	Small nuclear ribonucleoprotein E	126952
PALLD_HUMAN	Q8WX93	Q8WX93	PALLD	Palladin	126938
ARC1A_HUMAN	Q92747	Q92747	ARPC1A	Actin-related protein 2/3 complex subunit 1A	126847
TALDO_HUMAN	P37837	P37837	TALDO1	Transaldolase	126582
6PGD_HUMAN	P52209	P52209	PGD	6-phosphogluconate dehydrogenase, decarboxylating	126494
CO5A1_HUMAN	P20908	P20908	COL5A1	Collagen alpha-1(V) chain	126144
BASI_HUMAN	P35613	P35613	BSG	Basigin	126018
EHD4_HUMAN	Q9NZN3;Q9H223	Q9H223	EHD4	EH domain-containing protein 4	126004
CAH2_HUMAN	P00918	P00918	CA2	Carbonic anhydrase 2	125763
AK1C3_HUMAN	P42330	P42330	AKR1C3	Aldo-keto reductase family 1 member C3	124932
TCPZ_HUMAN	P40227	P40227	CCT6A	T-complex protein 1 subunit zeta	124480
GNAI1_HUMAN	P63096	P63096	GNAI1	Guanine nucleotide-binding protein G(i) subunit alpha-1	124312
AKA12_HUMAN	Q02952	Q02952	AKAP12	A-kinase anchor protein 12	123969
RS21_HUMAN	P63220	P63220	RPS21	Small ribosomal subunit protein eS21	123528
APOH_HUMAN	P02749	P02749	APOH	Beta-2-glycoprotein 1	123470
PGRC2_HUMAN	O15173	O15173	PGRMC2	Membrane-associated progesterone receptor component 2	123414
RL36_HUMAN	Q9Y3U8	Q9Y3U8	RPL36	Large ribosomal subunit protein eL36	123322
TMM43_HUMAN	Q9BTV4	Q9BTV4	TMEM43	Transmembrane protein 43	123106
APMAP_HUMAN	Q9HDC9	Q9HDC9	APMAP	Adipocyte plasma membrane-associated protein	122742
HDGF_HUMAN	P51858	P51858	HDGF	Hepatoma-derived growth factor	122582
CNN3_HUMAN	Q15417	Q15417	CNN3	Calponin-3	122412
SPEE_HUMAN	P19623	P19623	SRM	Spermidine synthase	122156
ARPC5_HUMAN	O15511	O15511	ARPC5	Actin-related protein 2/3 complex subunit 5	122046
GNAI3_HUMAN	P08754	P08754	GNAI3	Guanine nucleotide-binding protein G(i) subunit alpha-3	121892
PSB4_HUMAN	P28070	P28070	PSMB4	Proteasome subunit beta type-4	121688
RSU1_HUMAN	Q15404	Q15404	RSU1	Ras suppressor protein 1	121536
AT1B1_HUMAN	P05026	P05026	ATP1B1	Sodium/potassium-transporting ATPase subunit beta-1	121507
RL35_HUMAN	P42766	P42766	RPL35	Large ribosomal subunit protein uL29	121300
SCRB2_HUMAN	Q14108	Q14108	SCARB2	Lysosome membrane protein 2	120926
ILF3_HUMAN	Q96SI9;Q12906	Q12906	ILF3	Interleukin enhancer-binding factor 3	120361
LRC59_HUMAN	Q96AG4	Q96AG4	LRRC59	Leucine-rich repeat-containing protein 59	120260
RU17_HUMAN	P08621	P08621	SNRNP70	U1 small nuclear ribonucleoprotein 70 kDa	120240
RL7A_HUMAN	P62424	P62424	RPL7A	Large ribosomal subunit protein eL8	119762
U2AF2_HUMAN	P26368	P26368	U2AF2	Splicing factor U2AF 65 kDa subunit	119460
RL27_HUMAN	P61353	P61353	RPL27	Large ribosomal subunit protein eL27	119171
CAVN2_HUMAN	O95810	O95810	CAVIN2	Caveolae-associated protein 2	119056
LAMP1_HUMAN	P11279	P11279	LAMP1	Lysosome-associated membrane glycoprotein 1	118915
MAP4_HUMAN	P27816	P27816	MAP4	Microtubule-associated protein 4	118688
PGM5_HUMAN	Q15124	Q15124	PGM5	Phosphoglucomutase-like protein 5	118490
UCRI_HUMAN	P0C7P4;P47985	P47985	UQCRFS1	Cytochrome b-c1 complex subunit Rieske, mitochondrial	118075
CIRBP_HUMAN	Q14011	Q14011	CIRBP	Cold-inducible RNA-binding protein	117992
SNAA_HUMAN	P54920	P54920	NAPA	Alpha-soluble NSF attachment protein	117786
MYPT1_HUMAN	O14974	O14974	PPP1R12A	Protein phosphatase 1 regulatory subunit 12A	117667
HNRPL_HUMAN	P14866	P14866	HNRNPL	Heterogeneous nuclear ribonucleoprotein L	117632
FSCN1_HUMAN	Q16658	Q16658	FSCN1	Fascin	117598
FBLN5_HUMAN	Q9UBX5	Q9UBX5	FBLN5	Fibulin-5	117496
SAHH2_HUMAN	O43865	O43865	AHCYL1	S-adenosylhomocysteine hydrolase-like protein 1	117419
TCPD_HUMAN	P50991	P50991	CCT4	T-complex protein 1 subunit delta	117386
PRDX4_HUMAN	Q13162	Q13162	PRDX4	Peroxiredoxin-4	117126
MYOF_HUMAN	Q9NZM1	Q9NZM1	MYOF	Myoferlin	116833
EIF3C_HUMAN	Q99613;B5ME19	Q99613	EIF3C	Eukaryotic translation initiation factor 3 subunit C	116735
CLIC4_HUMAN	Q9Y696	Q9Y696	CLIC4	Chloride intracellular channel protein 4	116712
ADDG_HUMAN	Q9UEY8	Q9UEY8	ADD3	Gamma-adducin	116215
ATP5I_HUMAN	P56385	P56385	ATP5ME	ATP synthase subunit e, mitochondrial	116042
HXK1_HUMAN	P19367	P19367	HK1	Hexokinase-1	115914
HV372_HUMAN	A0A0B4J1Y9	A0A0B4J1Y9	IGHV3-72	Immunoglobulin heavy variable 3-72	115897
SNX3_HUMAN	O60493	O60493	SNX3	Sorting nexin-3	115630
SERA_HUMAN	O43175	O43175	PHGDH	D-3-phosphoglycerate dehydrogenase	115000
DOPD_HUMAN	A6NHG4;P30046	P30046	DDT	D-dopachrome decarboxylase	114920
STAT1_HUMAN	P42224	P42224	STAT1	Signal transducer and activator of transcription 1-alpha/beta	114838
FUBP1_HUMAN	Q96AE4	Q96AE4	FUBP1	Far upstream element-binding protein 1	114576
ZO1_HUMAN	Q07157	Q07157	TJP1	Tight junction protein ZO-1	114388
NOP56_HUMAN	O00567	O00567	NOP56	Nucleolar protein 56	114364
GLU2B_HUMAN	P14314	P14314	PRKCSH	Glucosidase 2 subunit beta	114178
RS19_HUMAN	P39019	P39019	RPS19	Small ribosomal subunit protein eS19	113682
FXR1_HUMAN	P51114	P51114	FXR1	RNA-binding protein FXR1	113153
CD2B2_HUMAN	O95400	O95400	CD2BP2	CD2 antigen cytoplasmic tail-binding protein 2	112959
ADDA_HUMAN	P35611	P35611	ADD1	Alpha-adducin	112368
EIF3A_HUMAN	Q14152	Q14152	EIF3A	Eukaryotic translation initiation factor 3 subunit A	112014
SSRD_HUMAN	P51571	P51571	SSR4	Translocon-associated protein subunit delta	111986
AT5EL_HUMAN;ATP5E_HUMAN	Q5VTU8;P56381	P56381;Q5VTU8	ATP5F1E;ATP5F1EP2	ATP synthase subunit epsilon, mitochondrial	111936
ITB1_HUMAN	P05556	P05556	ITGB1	Integrin beta-1	111930
H1X_HUMAN	Q92522	Q92522	H1-10	Histone H1.10	111745
SEPT7_HUMAN	Q16181	Q16181	SEPTIN7	Septin-7	111455
HARS1_HUMAN	P12081;P49590	P12081	HARS1	Histidine--tRNA ligase, cytoplasmic	111370
FLNC_HUMAN	Q14315	Q14315	FLNC	Filamin-C	111072
NADC_HUMAN	Q15274	Q15274	QPRT	Nicotinate-nucleotide pyrophosphorylase [carboxylating]	110968
DDX1_HUMAN	Q92499	Q92499	DDX1	ATP-dependent RNA helicase DDX1	110530
KHDR1_HUMAN	Q07666;O75525;Q5VWX1	Q07666	KHDRBS1	KH domain-containing, RNA-binding, signal transduction-associated protein 1	110474
RD23B_HUMAN	P54725;P54727	P54727	RAD23B	UV excision repair protein RAD23 homolog B	110021
IBP7_HUMAN	Q16270	Q16270	IGFBP7	Insulin-like growth factor-binding protein 7	109916
RL30_HUMAN	P62888	P62888	RPL30	Large ribosomal subunit protein eL30	109758
CLCA_HUMAN	P09496	P09496	CLTA	Clathrin light chain A	109661
RL26_HUMAN	P61254;Q9UNX3	P61254	RPL26	Large ribosomal subunit protein uL24	109126
COX6C_HUMAN	P09669	P09669	COX6C	Cytochrome c oxidase subunit 6C	109092
U5S1_HUMAN	Q15029	Q15029	EFTUD2	116 kDa U5 small nuclear ribonucleoprotein component	109008
CYFP1_HUMAN	Q7L576	Q7L576	CYFIP1	Cytoplasmic FMR1-interacting protein 1	108979
SC23A_HUMAN	Q15436	Q15436	SEC23A	Protein transport protein Sec23A	108718
HLAA_HUMAN	P04439	P04439	HLA-A	HLA class I histocompatibility antigen, A alpha chain	108666
GBB1_HUMAN	P62873	P62873	GNB1	Guanine nucleotide-binding protein G(I)/G(S)/G(T) subunit beta-1	108588
RL3_HUMAN	P39023	P39023	RPL3	Large ribosomal subunit protein uL3	108456
PFKAL_HUMAN	P08237;P17858	P17858	PFKL	ATP-dependent 6-phosphofructokinase, liver type	108218
PSB6_HUMAN	P28072	P28072	PSMB6	Proteasome subunit beta type-6	108037
VP26A_HUMAN	O75436	O75436	VPS26A	Vacuolar protein sorting-associated protein 26A	107892
COR1A_HUMAN	P31146	P31146	CORO1A	Coronin-1A	107870
COFA1_HUMAN	P39059	P39059	COL15A1	Collagen alpha-1(XV) chain	107413
LRP1_HUMAN	Q07954	Q07954	LRP1	Prolow-density lipoprotein receptor-related protein 1	107196
TMED9_HUMAN	Q9BVK6	Q9BVK6	TMED9	Transmembrane emp24 domain-containing protein 9	107076
GSTM3_HUMAN	P21266	P21266	GSTM3	Glutathione S-transferase Mu 3	107015
PSB1_HUMAN	P20618	P20618	PSMB1	Proteasome subunit beta type-1	106562
RS3A_HUMAN	P61247	P61247	RPS3A	Small ribosomal subunit protein eS1	105848
CPNE1_HUMAN	Q99829	Q99829	CPNE1	Copine-1	105828
KPLCE_HUMAN	Q5T750	Q5T750	KPLCE	Protein KPLCE	105750
RRAS_HUMAN	P10301	P10301	RRAS	Ras-related protein R-Ras	105702
LV321_HUMAN	P80748	P80748	IGLV3-21	Immunoglobulin lambda variable 3-21	105493
AN32A_HUMAN	P39687;O43423	P39687	ANP32A	Acidic leucine-rich nuclear phosphoprotein 32 family member A	105323
KAD2_HUMAN	P54819	P54819	AK2	Adenylate kinase 2, mitochondrial	105303
AP2M1_HUMAN	Q96CW1	Q96CW1	AP2M1	AP-2 complex subunit mu	105093
PSMD6_HUMAN	Q15008	Q15008	PSMD6	26S proteasome non-ATPase regulatory subunit 6	104956
PSA5_HUMAN	P28066	P28066	PSMA5	Proteasome subunit alpha type-5	104365
S10AA_HUMAN	P60903	P60903	S100A10	Protein S100-A10	104355
RCN1_HUMAN	Q15293	Q15293	RCN1	Reticulocalbin-1	104094
PUR9_HUMAN	P31939	P31939	ATIC	Bifunctional purine biosynthesis protein ATIC	103900
ITIH4_HUMAN	Q14624	Q14624	ITIH4	Inter-alpha-trypsin inhibitor heavy chain H4	103678
SYDC_HUMAN	P14868	P14868	DARS1	Aspartate--tRNA ligase, cytoplasmic	103637
2AAA_HUMAN	P30153	P30153	PPP2R1A	Serine/threonine-protein phosphatase 2A 65 kDa regulatory subunit A alpha isoform	103549
PDIA4_HUMAN	P13667	P13667	PDIA4	Protein disulfide-isomerase A4	103445
1433F_HUMAN	Q04917	Q04917	YWHAH	14-3-3 protein eta	103154
TMT1A_HUMAN	Q9H8H3	Q9H8H3	TMT1A	N6-adenosine-methyltransferase TMT1A	102986
ASSY_HUMAN	P00966	P00966	ASS1	Argininosuccinate synthase	102802
FAK1_HUMAN	Q05397	Q05397	PTK2	Focal adhesion kinase 1	102644
RS30_HUMAN	P62861	P62861	FAU	Ubiquitin-like FUBI-ribosomal protein eS30 fusion protein	102578
HV434_HUMAN;HV439_HUMAN;HV459_HUMAN;HV461_HUMAN;HVD34_HUMAN;HVD82_HUMAN	P0DP06;P0DP08;P01824;P01825;A0A0C4DH41;A0A0J9YWU9;P06331	A0A0C4DH41;P01824;P01825;P06331;P0DP06;P0DP08	IGHV4-30-4;IGHV4-34;IGHV4-38-2;IGHV4-39;IGHV4-59;IGHV4-61	Immunoglobulin heavy variable 4-61	102561
MGST2_HUMAN	Q99735	Q99735	MGST2	Microsomal glutathione S-transferase 2	102368
PGM2_HUMAN	Q96G03	Q96G03	PGM2	Phosphopentomutase	102359
KAD1_HUMAN	P00568	P00568	AK1	Adenylate kinase isoenzyme 1	102076
NAGK_HUMAN	Q9UJ70	Q9UJ70	NAGK	N-acetyl-D-glucosamine kinase	101962
RL19_HUMAN	P84098	P84098	RPL19	Large ribosomal subunit protein eL19	101898
HDAC1_HUMAN	Q13547	Q13547	HDAC1	Histone deacetylase 1	101834
A0A075B7D0_HUMAN	A0A075B7D0	A0A075B7D0	IGHV1OR15-1	Immunoglobulin heavy variable 1/OR15-1 (non-functional) (Fragment)	101832
ATP5H_HUMAN	O75947	O75947	ATP5PD	ATP synthase subunit d, mitochondrial	101735
NDUS1_HUMAN	P28331	P28331	NDUFS1	NADH-ubiquinone oxidoreductase 75 kDa subunit, mitochondrial	101515
SF3B3_HUMAN	Q15393	Q15393	SF3B3	Splicing factor 3B subunit 3	101483
VASN_HUMAN	Q6EMK4	Q6EMK4	VASN	Vasorin	101166
EHD1_HUMAN	Q9H4M9;Q9NZN3	Q9H4M9	EHD1	EH domain-containing protein 1	101056
RHOA_HUMAN	P61586	P61586	RHOA	Transforming protein RhoA	100942
AP2B1_HUMAN	Q10567;P63010	P63010	AP2B1	AP-2 complex subunit beta	100772
RS20_HUMAN	P60866	P60866	RPS20	Small ribosomal subunit protein uS10	100470
QOR_HUMAN	Q08257	Q08257	CRYZ	Quinone oxidoreductase	100401
STT3B_HUMAN	Q8TCJ2	Q8TCJ2	STT3B	Dolichyl-diphosphooligosaccharide--protein glycosyltransferase subunit STT3B	100311
CALU_HUMAN	O43852	O43852	CALU	Calumenin	100217
CAN2_HUMAN	P17655	P17655	CAPN2	Calpain-2 catalytic subunit	99988.4
COTL1_HUMAN	Q14019	Q14019	COTL1	Coactosin-like protein	99923
RS5_HUMAN	P46782	P46782	RPS5	Small ribosomal subunit protein uS7	99909.6
ERP44_HUMAN	Q9BS26	Q9BS26	ERP44	Endoplasmic reticulum resident protein 44	99830.2
LMAN1_HUMAN	P49257	P49257	LMAN1	Protein ERGIC-53	99628.8
LA_HUMAN	P05455	P05455	SSB	Lupus La protein	99493.9
1433S_HUMAN	P31947	P31947	SFN	14-3-3 protein sigma	99425.6
SF3B2_HUMAN	Q13435	Q13435	SF3B2	Splicing factor 3B subunit 2	99347.4
TIA1_HUMAN	P31483	P31483	TIA1	Cytotoxic granule associated RNA binding protein TIA1	99324.1
FKBP3_HUMAN	Q00688	Q00688	FKBP3	Peptidyl-prolyl cis-trans isomerase FKBP3	99235.4
PPT1_HUMAN	P50897	P50897	PPT1	Palmitoyl-protein thioesterase 1	99203.5
CRIP1_HUMAN	P50238	P50238	CRIP1	Cysteine-rich protein 1	99062.6
AP2A1_HUMAN	O95782	O95782	AP2A1	AP-2 complex subunit alpha-1	98800.4
TBCA_HUMAN	O75347	O75347	TBCA	Tubulin-specific chaperone A	98699.6
H2AW_HUMAN	Q9P0M6	Q9P0M6	MACROH2A2	Core histone macro-H2A.2	98684.4
UBA3_HUMAN	Q8TBC4	Q8TBC4	UBA3	NEDD8-activating enzyme E1 catalytic subunit	98565.8
PSMD5_HUMAN	Q16401	Q16401	PSMD5	26S proteasome non-ATPase regulatory subunit 5	98350.1
NID2_HUMAN	Q14112	Q14112	NID2	Nidogen-2	98329.8
SMD1_HUMAN	P62314	P62314	SNRPD1	Small nuclear ribonucleoprotein Sm D1	98283.1
EX3L4_HUMAN	Q17RC7	Q17RC7	EXOC3L4	Exocyst complex component 3-like protein 4	98165.4
THIM_HUMAN	P42765	P42765	ACAA2	3-ketoacyl-CoA thiolase, mitochondrial	98036.1
DDX6_HUMAN	P26196	P26196	DDX6	Probable ATP-dependent RNA helicase DDX6	97990.4
GPX1_HUMAN	P07203	P07203	GPX1	Glutathione peroxidase 1	97828.5
DRB3_HUMAN	P79483	P79483	HLA-DRB3	HLA class II histocompatibility antigen, DR beta 3 chain	97733.6
CFAI_HUMAN	P05156	P05156	CFI	Complement factor I	97691.8
PROB1_HUMAN	E7EW31	E7EW31	PROB1	Proline-rich basic protein 1	97595.1
UBC9_HUMAN	P63279	P63279	UBE2I	SUMO-conjugating enzyme UBC9	97570.7
KVD15_HUMAN	A0A087WSY6	A0A087WSY6	IGKV3D-15	Immunoglobulin kappa variable 3D-15	97533.6
HV374_HUMAN	A0A0B4J1X5;A0A075B7E8	A0A0B4J1X5	IGHV3-74	Immunoglobulin heavy variable 3-74	97500.6
RBM39_HUMAN	Q14498	Q14498	RBM39	RNA-binding protein 39	97283.2
ECH1_HUMAN	Q13011	Q13011	ECH1	Delta(3,5)-Delta(2,4)-dienoyl-CoA isomerase, mitochondrial	97263.1
RSMB_HUMAN	P14678	P14678	SNRPB	Small nuclear ribonucleoprotein-associated proteins B and B'	97219.3
MECP2_HUMAN	P51608	P51608	MECP2	Methyl-CpG-binding protein 2	97040.8
AMPB_HUMAN	Q9H4A4	Q9H4A4	RNPEP	Aminopeptidase B	96980.4
SIPA1_HUMAN	Q96FS4	Q96FS4	SIPA1	Signal-induced proliferation-associated protein 1	96690.5
HNRL2_HUMAN	Q1KMD3	Q1KMD3	HNRNPUL2	Heterogeneous nuclear ribonucleoprotein U-like protein 2	96592.6
IF5A1_HUMAN	Q9GZV4;P63241;Q6IS14	P63241	EIF5A	Eukaryotic translation initiation factor 5A-1	96558.1
RS7_HUMAN	P62081	P62081	RPS7	Small ribosomal subunit protein eS7	96547.1
RAB6A_HUMAN	Q9NRW1;P20340;Q9H0N0	P20340	RAB6A	Ras-related protein Rab-6A	96354.8
IGHA2_HUMAN	P01877	P01877	IGHA2	Immunoglobulin heavy constant alpha 2	96330.6
RL18A_HUMAN	Q02543	Q02543	RPL18A	Large ribosomal subunit protein eL20	96161.6
NIT2_HUMAN	Q9NQR4	Q9NQR4	NIT2	Omega-amidase NIT2	96042.4
CSK_HUMAN	P41240	P41240	CSK	Tyrosine-protein kinase CSK	96021.5
STING_HUMAN	Q86WV6	Q86WV6	STING1	Stimulator of interferon genes protein	95580.6
UBF1_HUMAN	P17480	P17480	UBTF	Nucleolar transcription factor 1	95503.8
SART3_HUMAN	Q15020	Q15020	SART3	Squamous cell carcinoma antigen recognized by T-cells 3	95152.8
SCPDL_HUMAN	Q8NBX0	Q8NBX0	SCCPDH	Saccharopine dehydrogenase-like oxidoreductase	94810.7
HEP2_HUMAN	P05546	P05546	SERPIND1	Heparin cofactor 2	94751.1
F10A1_HUMAN	P50502;Q8NFI4	P50502	ST13	Hsc70-interacting protein	94686.6
CTND1_HUMAN	O60716	O60716	CTNND1	Catenin delta-1	94674.3
EZRI_HUMAN	P15311	P15311	EZR	Ezrin	94521.4
PRA18_HUMAN	Q5VWM3;Q5SWL8	Q5VWM3	PRAMEF18	PRAME family member 18	94428.9
FERM2_HUMAN	Q96AC1;Q9BQL6	Q96AC1	FERMT2	Fermitin family homolog 2	94321.5
RL24_HUMAN	P83731	P83731	RPL24	Large ribosomal subunit protein eL24	94205.2
PNCB_HUMAN	Q6XQN6	Q6XQN6	NAPRT	Nicotinate phosphoribosyltransferase	94180.7
PERM_HUMAN	P05164	P05164	MPO	Myeloperoxidase	94082
RALY_HUMAN	Q9UKM9	Q9UKM9	RALY	RNA-binding protein Raly	93786.8
GRHPR_HUMAN	Q9UBQ7	Q9UBQ7	GRHPR	Glyoxylate reductase/hydroxypyruvate reductase	93648.3
PSA6_HUMAN	P60900	P60900	PSMA6	Proteasome subunit alpha type-6	93418.9
CAVN3_HUMAN	Q969G5	Q969G5	CAVIN3	Caveolae-associated protein 3	93269.1
ODO1_HUMAN	Q02218	Q02218	OGDH	2-oxoglutarate dehydrogenase complex component E1	93151.9
SNTB2_HUMAN	Q13425	Q13425	SNTB2	Beta-2-syntrophin	93105
ECHA_HUMAN	P40939	P40939	HADHA	Trifunctional enzyme subunit alpha, mitochondrial	93084.2
HSP74_HUMAN	P34932	P34932	HSPA4	Heat shock 70 kDa protein 4	92946
PSA_HUMAN	A6NEC2;P55786	P55786	NPEPPS	Puromycin-sensitive aminopeptidase	92933.8
PSPC1_HUMAN	Q8WXF1	Q8WXF1	PSPC1	Paraspeckle component 1	92930.5
CSPG2_HUMAN	P13611	P13611	VCAN	Versican core protein	92910.8
RRBP1_HUMAN	Q9P2E9	Q9P2E9	RRBP1	Ribosome-binding protein 1	92567
TR150_HUMAN	Q9Y2W1	Q9Y2W1	THRAP3	Thyroid hormone receptor-associated protein 3	92546.1
F13A_HUMAN	P00488	P00488	F13A1	Coagulation factor XIII A chain	91935.3
IGJ_HUMAN	P01591	P01591	JCHAIN	Immunoglobulin J chain	91871.3
PSME2_HUMAN	Q9UL46	Q9UL46	PSME2	Proteasome activator complex subunit 2	91833.6
PERE_HUMAN	P11678	P11678	EPX	Eosinophil peroxidase	91794.8
RUXGL_HUMAN;RUXG_HUMAN	A8MWD9;P62308	A8MWD9;P62308	SNRPG;SNRPGP15	Putative small nuclear ribonucleoprotein G-like protein 15	91779.1
HV601_HUMAN	A0A0B4J1U7	A0A0B4J1U7	IGHV6-1	Immunoglobulin heavy variable 6-1	91778.1
CCAR2_HUMAN	Q8N163	Q8N163	CCAR2	Cell cycle and apoptosis regulator protein 2	91768.8
RS10_HUMAN	P46783	P46783	RPS10	Small ribosomal subunit protein eS10	91721.8
CYTB_HUMAN	P04080	P04080	CSTB	Cystatin-B	91252.3
DDX3X_HUMAN	O15523;O00571	O00571	DDX3X	ATP-dependent RNA helicase DDX3X	91176.4
CN37_HUMAN	P09543	P09543	CNP	2',3'-cyclic-nucleotide 3'-phosphodiesterase	91103.8
KV224_HUMAN;KVD24_HUMAN	A0A075B6R9;A0A0C4DH68	A0A075B6R9;A0A0C4DH68	IGKV2-24;IGKV2D-24	Probable non-functional immunoglobulin kappa variable 2D-24	91008.6
CTBP1_HUMAN	P56545;Q13363	Q13363	CTBP1	C-terminal-binding protein 1	90835.6
RS11_HUMAN	P62280	P62280	RPS11	Small ribosomal subunit protein uS17	90830.2
RAB8A_HUMAN	Q92930;P61006	P61006	RAB8A	Ras-related protein Rab-8A	90505.8
ARC1B_HUMAN	O15143	O15143	ARPC1B	Actin-related protein 2/3 complex subunit 1B	90419.1
NOP58_HUMAN	Q9Y2X3	Q9Y2X3	NOP58	Nucleolar protein 58	90398.3
FYCO1_HUMAN	Q9BQS8	Q9BQS8	FYCO1	FYVE and coiled-coil domain-containing protein 1	90381.9
NUP93_HUMAN	Q8N1F7	Q8N1F7	NUP93	Nuclear pore complex protein Nup93	90065.1
AT2A2_HUMAN	P16615	P16615	ATP2A2	Sarcoplasmic/endoplasmic reticulum calcium ATPase 2	90045.6
IF6_HUMAN	P56537	P56537	EIF6	Eukaryotic translation initiation factor 6	89956
GRB2_HUMAN	P62993	P62993	GRB2	Growth factor receptor-bound protein 2	89905.2
MZB1_HUMAN	Q8WU39	Q8WU39	MZB1	Marginal zone B- and B1-cell-specific protein	89855.8
TPD54_HUMAN	O43399	O43399	TPD52L2	Tumor protein D54	89849.4
RUVB2_HUMAN	Q9Y230	Q9Y230	RUVBL2	RuvB-like 2	89506.6
OAS3_HUMAN	Q9Y6K5	Q9Y6K5	OAS3	2'-5'-oligoadenylate synthase 3	89224.1
HYOU1_HUMAN	Q9Y4L1	Q9Y4L1	HYOU1	Hypoxia up-regulated protein 1	89132.8
MAT2B_HUMAN	Q9NZL9	Q9NZL9	MAT2B	Methionine adenosyltransferase 2 subunit beta	89095.1
UBP14_HUMAN	P54578	P54578	USP14	Ubiquitin carboxyl-terminal hydrolase 14	88978.2
SYNP2_HUMAN	Q9UMS6	Q9UMS6	SYNPO2	Synaptopodin-2	88943.6
DCTN2_HUMAN	Q13561	Q13561	DCTN2	Dynactin subunit 2	88900.5
MK03_HUMAN	P27361	P27361	MAPK3	Mitogen-activated protein kinase 3	88708.1
ARK72_HUMAN	O43488	O43488	AKR7A2	Aflatoxin B1 aldehyde reductase member 2	88661.8
SYAC_HUMAN	P49588	P49588	AARS1	Alanine--tRNA ligase, cytoplasmic	88598.2
SYRC_HUMAN	P54136	P54136	RARS1	Arginine--tRNA ligase, cytoplasmic	88510.4
TFAM_HUMAN	Q00059	Q00059	TFAM	Transcription factor A, mitochondrial	88375.4
NIBA2_HUMAN	Q96TA1	Q96TA1	NIBAN2	Protein Niban 2	88295.7
TEBP_HUMAN	Q15185	Q15185	PTGES3	Prostaglandin E synthase 3	87983.6
SRC8_HUMAN	Q14247	Q14247	CTTN	Src substrate cortactin	87892.6
SPB9_HUMAN	P50453	P50453	SERPINB9	Serpin B9	87782.5
MYL4_HUMAN	P12829	P12829	MYL4	Myosin light chain 4	87714.4
LKHA4_HUMAN	P09960	P09960	LTA4H	Leukotriene A-4 hydrolase	87676.1
LANC1_HUMAN	O43813	O43813	LANCL1	Glutathione S-transferase LANCL1	87482.5
ACADM_HUMAN	P11310	P11310	ACADM	Medium-chain specific acyl-CoA dehydrogenase, mitochondrial	86979
HV551_HUMAN	A0A0C4DH38	A0A0C4DH38	IGHV5-51	Immunoglobulin heavy variable 5-51	86943.3
SFXN3_HUMAN	Q9BWM7	Q9BWM7	SFXN3	Sideroflexin-3	86807.6
MAGT1_HUMAN	Q9H0U3	Q9H0U3	MAGT1	Magnesium transporter protein 1	86706.6
HAP28_HUMAN	Q13442	Q13442	PDAP1	28 kDa heat- and acid-stable phosphoprotein	86648.7
SYFB_HUMAN	Q9NSD9	Q9NSD9	FARSB	Phenylalanine--tRNA ligase beta subunit	86642.8
SYVC_HUMAN	P26640	P26640	VARS1	Valine--tRNA ligase	86601.8
PTGDS_HUMAN	P41222	P41222	PTGDS	Prostaglandin-H2 D-isomerase	86473.9
NPTN_HUMAN	Q9Y639	Q9Y639	NPTN	Neuroplastin	86425.3
RBBP4_HUMAN	Q09028	Q09028	RBBP4	Histone-binding protein RBBP4	86249.1
TAP2_HUMAN	Q03519	Q03519	TAP2	Antigen peptide transporter 2	86205.9
NACAM_HUMAN	E9PAV3	E9PAV3	NACA	Nascent polypeptide-associated complex subunit alpha, muscle-specific form	86144.9
PURA_HUMAN	Q00577	Q00577	PURA	Transcriptional activator protein Pur-alpha	85804.9
HNRPF_HUMAN	P52597	P52597	HNRNPF	Heterogeneous nuclear ribonucleoprotein F	85655.9
PFKAM_HUMAN	P08237	P08237	PFKM	ATP-dependent 6-phosphofructokinase, muscle type	85631.9
SAE2_HUMAN	Q9UBT2	Q9UBT2	UBA2	SUMO-activating enzyme subunit 2	85561.7
LAMB1_HUMAN	P07942	P07942	LAMB1	Laminin subunit beta-1	85492
XPO2_HUMAN	P55060	P55060	CSE1L	Exportin-2	85362.8
MX1_HUMAN	P20591	P20591	MX1	Interferon-induced GTP-binding protein Mx1	85353.8
ENTP1_HUMAN	P49961	P49961	ENTPD1	Ectonucleoside triphosphate diphosphohydrolase 1	85332.4
ACOT1_HUMAN	Q86TX2;P49753	Q86TX2	ACOT1	Acyl-coenzyme A thioesterase 1	85256.6
VDAC1_HUMAN	P21796	P21796	VDAC1	Voltage-dependent anion-selective channel protein 1	85222.8
SC11A_HUMAN	P67812	P67812	SEC11A	Signal peptidase complex catalytic subunit SEC11A	85213.5
DHX15_HUMAN	O43143	O43143	DHX15	ATP-dependent RNA helicase DHX15	85201
ATPD_HUMAN	P30049	P30049	ATP5F1D	ATP synthase subunit delta, mitochondrial	85125.9
RCC2_HUMAN	Q9P258	Q9P258	RCC2	Protein RCC2	84769.3
RL9_HUMAN	P32969	P32969	RPL9P9	Large ribosomal subunit protein uL6	84501.1
DYR_HUMAN	P00374	P00374	DHFR	Dihydrofolate reductase	84440.3
TRYB1_HUMAN;TRYB2_HUMAN	Q15661;P20231	P20231;Q15661	TPSAB1;TPSB2	Tryptase beta-2	84362.1
CDC37_HUMAN	Q16543	Q16543	CDC37	Hsp90 co-chaperone Cdc37	84299.4
CATG_HUMAN	P08311	P08311	CTSG	Cathepsin G	83996.4
ATP5L_HUMAN	O75964	O75964	ATP5MG	ATP synthase subunit g, mitochondrial	83738
TGFI1_HUMAN	O43294	O43294	TGFB1I1	Transforming growth factor beta-1-induced transcript 1 protein	83437.5
PRS6A_HUMAN	P17980	P17980	PSMC3	26S proteasome regulatory subunit 6A	83422.6
CYB5B_HUMAN	O43169	O43169	CYB5B	Cytochrome b5 type B	83226.6
MIC60_HUMAN	Q16891	Q16891	IMMT	MICOS complex subunit MIC60	83174.9
TBCK_HUMAN	Q8TEA7	Q8TEA7	TBCK	TBC domain-containing protein kinase-like protein	83049.7
AL1B1_HUMAN	P30837	P30837	ALDH1B1	Aldehyde dehydrogenase X, mitochondrial	82924.8
MMSA_HUMAN	Q02252	Q02252	ALDH6A1	Methylmalonate-semialdehyde dehydrogenase [acylating], mitochondrial	82620.6
PABP2_HUMAN	A6NDY0;Q86U42	Q86U42	PABPN1	Polyadenylate-binding protein 2	82364.3
NUCB1_HUMAN	Q02818	Q02818	NUCB1	Nucleobindin-1	82073.4
LHPP_HUMAN	Q9H008	Q9H008	LHPP	Phospholysine phosphohistidine inorganic pyrophosphate phosphatase	81990.4
FABPH_HUMAN	P05413	P05413	FABP3	Fatty acid-binding protein, heart	81975.8
TRA2B_HUMAN	P62995	P62995	TRA2B	Transformer-2 protein homolog beta	81940.7
NUCKS_HUMAN	Q9H1E3	Q9H1E3	NUCKS1	Nuclear ubiquitous casein and cyclin-dependent kinase substrate 1	81830.9
RTCB_HUMAN	Q9Y3I0	Q9Y3I0	RTCB	RNA-splicing ligase RtcB homolog	81787
COPD_HUMAN	P48444	P48444	ARCN1	Coatomer subunit delta	81758.1
EIF3F_HUMAN	O00303	O00303	EIF3F	Eukaryotic translation initiation factor 3 subunit F	81740.3
RAD50_HUMAN	Q92878	Q92878	RAD50	DNA repair protein RAD50	81498.6
CD99_HUMAN	P14209	P14209	CD99	CD99 antigen	81457.5
LTOR3_HUMAN	Q9UHA4	Q9UHA4	LAMTOR3	Ragulator complex protein LAMTOR3	81447.6
THRB_HUMAN	P00734	P00734	F2	Prothrombin	81430
DHRS7_HUMAN	Q9Y394	Q9Y394	DHRS7	Dehydrogenase/reductase SDR family member 7	81365.5
IF4B_HUMAN	P23588	P23588	EIF4B	Eukaryotic translation initiation factor 4B	81128.1
FLNB_HUMAN	O75369	O75369	FLNB	Filamin-B	80954.3
NP1L4_HUMAN	Q99733	Q99733	NAP1L4	Nucleosome assembly protein 1-like 4	80877.4
CRIP2_HUMAN	P52943	P52943	CRIP2	Cysteine-rich protein 2	80756.1
ECI1_HUMAN	P42126	P42126	ECI1	Enoyl-CoA delta isomerase 1, mitochondrial	80625.2
DCXR_HUMAN	Q7Z4W1	Q7Z4W1	DCXR	L-xylulose reductase	80584.7
TCPE_HUMAN	P48643	P48643	CCT5	T-complex protein 1 subunit epsilon	80532.8
LPP_HUMAN	Q93052	Q93052	LPP	Lipoma-preferred partner	80096.2
TYPH_HUMAN	P19971	P19971	TYMP	Thymidine phosphorylase	79783.9
PSA3_HUMAN	P25788	P25788	PSMA3	Proteasome subunit alpha type-3	79737
VIGLN_HUMAN	Q00341	Q00341	HDLBP	Vigilin	79428.9
HBG1_HUMAN	P69891;P69892	P69891	HBG1	Hemoglobin subunit gamma-1	79319.7
CO5_HUMAN	P01031	P01031	C5	Complement C5	79266.8
TFG_HUMAN	Q92734	Q92734	TFG	Protein TFG	79262.9
RBPMS_HUMAN	Q93062	Q93062	RBPMS	RNA-binding protein with multiple splicing	79199.8
GBP1_HUMAN	P32455;Q9H0R5	P32455	GBP1	Guanylate-binding protein 1	79185.2
DYN2_HUMAN	Q9UQ16;P50570	P50570	DNM2	Dynamin-2	79105.2
JAM1_HUMAN	Q9Y624	Q9Y624	F11R	Junctional adhesion molecule A	79026.8
SMC1A_HUMAN	Q14683	Q14683	SMC1A	Structural maintenance of chromosomes protein 1A	78990.7
ETHE1_HUMAN	O95571	O95571	ETHE1	Persulfide dioxygenase ETHE1, mitochondrial	78816.5
OXSR1_HUMAN	O95747	O95747	OXSR1	Serine/threonine-protein kinase OSR1	78715.8
GLOD4_HUMAN	Q9HC38	Q9HC38	GLOD4	Glyoxalase domain-containing protein 4	78673
ASPN_HUMAN	Q9BXN1	Q9BXN1	ASPN	Asporin	78649.7
DYHC2_HUMAN	Q8NCM8	Q8NCM8	DYNC2H1	Cytoplasmic dynein 2 heavy chain 1	78505.1
GAPR1_HUMAN	Q9H4G4	Q9H4G4	GLIPR2	Golgi-associated plant pathogenesis-related protein 1	78466.4
HEBP1_HUMAN	Q9NRV9	Q9NRV9	HEBP1	Heme-binding protein 1	78414
AATC_HUMAN	P17174	P17174	GOT1	Aspartate aminotransferase, cytoplasmic	78369.1
CDC42_HUMAN	P60953	P60953	CDC42	Cell division control protein 42 homolog	78348.6
LBR_HUMAN	Q14739	Q14739	LBR	Delta(14)-sterol reductase LBR	78314.2
SSRP1_HUMAN	Q08945	Q08945	SSRP1	FACT complex subunit SSRP1	78277.4
AIP_HUMAN	O00170	O00170	AIP	AH receptor-interacting protein	78247.3
LAMA4_HUMAN	Q16363	Q16363	LAMA4	Laminin subunit alpha-4	78225.3
AEBP1_HUMAN	Q8IUX7	Q8IUX7	AEBP1	Adipocyte enhancer-binding protein 1	77999.3
NCKP1_HUMAN	Q9Y2A7	Q9Y2A7	NCKAP1	Nck-associated protein 1	77772.8
ROA0_HUMAN	Q13151	Q13151	HNRNPA0	Heterogeneous nuclear ribonucleoprotein A0	77562.2
SYIC_HUMAN	P41252	P41252	IARS1	Isoleucine--tRNA ligase, cytoplasmic	77534.9
NSF_HUMAN	P46459	P46459	NSF	Vesicle-fusing ATPase	77448.2
NTF2_HUMAN	P61970	P61970	NUTF2	Nuclear transport factor 2	77441.4
RAIN_HUMAN	Q5U651	Q5U651	RASIP1	Ras-interacting protein 1	77422
LMAN2_HUMAN	Q12907	Q12907	LMAN2	Vesicular integral-membrane protein VIP36	77297.3
HCDH_HUMAN	Q16836	Q16836	HADH	Hydroxyacyl-coenzyme A dehydrogenase, mitochondrial	77114.8
ACLY_HUMAN	P53396	P53396	ACLY	ATP-citrate synthase	77060.5
GNAQ_HUMAN	P50148	P50148	GNAQ	Guanine nucleotide-binding protein G(q) subunit alpha	76967.4
AHNK2_HUMAN	Q8IVF2	Q8IVF2	AHNAK2	Protein AHNAK2	76891.3
SC24C_HUMAN	P53992	P53992	SEC24C	Protein transport protein Sec24C	76805.6
TBB3_HUMAN	Q13509	Q13509	TUBB3	Tubulin beta-3 chain	76646
ERLN2_HUMAN	O94905	O94905	ERLIN2	Erlin-2	76641.6
DECR_HUMAN	Q16698	Q16698	DECR1	2,4-dienoyl-CoA reductase [(3E)-enoyl-CoA-producing], mitochondrial	76594.2
THIO_HUMAN	P10599	P10599	TXN	Thioredoxin	76548.5
RUVB1_HUMAN	Q9Y265	Q9Y265	RUVBL1	RuvB-like 1	76463.9
SYK_HUMAN	Q15046	Q15046	KARS1	Lysine--tRNA ligase	76452.4
UTRN_HUMAN	P46939	P46939	UTRN	Utrophin	76312.4
AL5AP_HUMAN	P20292	P20292	ALOX5AP	Arachidonate 5-lipoxygenase-activating protein	76157.5
LNP_HUMAN	Q9C0E8	Q9C0E8	LNPK	Endoplasmic reticulum junction formation protein lunapark	76103.1
HNRPQ_HUMAN	O60506	O60506	SYNCRIP	Heterogeneous nuclear ribonucleoprotein Q	76032.5
SYNEM_HUMAN	O15061	O15061	SYNM	Synemin	76031.5
TCPW_HUMAN	Q92526	Q92526	CCT6B	T-complex protein 1 subunit zeta-2	75963.8
K2026_HUMAN	Q5HYC2	Q5HYC2	KIAA2026	Uncharacterized protein KIAA2026	75690.5
RBM14_HUMAN	Q96PK6	Q96PK6	RBM14	RNA-binding protein 14	75678.8
ILEU_HUMAN	P30740	P30740	SERPINB1	Leukocyte elastase inhibitor	75437.4
SDHA_HUMAN	P31040	P31040	SDHA	Succinate dehydrogenase [ubiquinone] flavoprotein subunit, mitochondrial	75332.8
VATB2_HUMAN	P21281	P21281	ATP6V1B2	V-type proton ATPase subunit B, brain isoform	75315.4
NB5R1_HUMAN	Q9UHQ9	Q9UHQ9	CYB5R1	NADH-cytochrome b5 reductase 1	75315.2
COPB_HUMAN	P53618	P53618	COPB1	Coatomer subunit beta	75301.1
SEPT9_HUMAN	Q9UHD8	Q9UHD8	SEPTIN9	Septin-9	75241.9
CDN1B_HUMAN	P46527	P46527	CDKN1B	Cyclin-dependent kinase inhibitor 1B	75222.9
REEP5_HUMAN	Q00765	Q00765	REEP5	Receptor expression-enhancing protein 5	75000.7
SDHB_HUMAN	P21912	P21912	SDHB	Succinate dehydrogenase [ubiquinone] iron-sulfur subunit, mitochondrial	74942.5
NASP_HUMAN	P49321	P49321	NASP	Nuclear autoantigenic sperm protein	74932.6
RENT1_HUMAN	Q92900	Q92900	UPF1	Regulator of nonsense transcripts 1	74898.6
AKCL2_HUMAN	Q96JD6	Q96JD6	AKR1E2	1,5-anhydro-D-fructose reductase	74833.3
VATA_HUMAN	P38606	P38606	ATP6V1A	V-type proton ATPase catalytic subunit A	74674.4
ADT1_HUMAN	P12235	P12235	SLC25A4	ADP/ATP translocase 1	74508.9
MTCH2_HUMAN	Q9Y6C9	Q9Y6C9	MTCH2	Mitochondrial carrier homolog 2	74376.8
ITA5_HUMAN	P08648	P08648	ITGA5	Integrin alpha-5	74162.2
FAAA_HUMAN	P16930	P16930	FAH	Fumarylacetoacetase	74048.1
PDXK_HUMAN	O00764	O00764	PDXK	Pyridoxal kinase	73925.5
UGDH_HUMAN	O60701	O60701	UGDH	UDP-glucose 6-dehydrogenase	73920.2
AOFA_HUMAN	P21397	P21397	MAOA	Amine oxidase [flavin-containing] A	73891.6
CO7A1_HUMAN	Q02388	Q02388	COL7A1	Collagen alpha-1(VII) chain	73851.7
METK2_HUMAN	P31153	P31153	MAT2A	S-adenosylmethionine synthase isoform type-2	73773.8
DLDH_HUMAN	P09622	P09622	DLD	Dihydrolipoyl dehydrogenase, mitochondrial	73764.8
COR1C_HUMAN	Q9ULV4	Q9ULV4	CORO1C	Coronin-1C	73665
TOIP1_HUMAN	Q5JTV8	Q5JTV8	TOR1AIP1	Torsin-1A-interacting protein 1	73540.4
FRY_HUMAN	Q5TBA9	Q5TBA9	FRY	Protein furry homolog	73330.7
CISD2_HUMAN	Q8N5K1	Q8N5K1	CISD2	CDGSH iron-sulfur domain-containing protein 2	73237.8
GNA13_HUMAN	Q14344	Q14344	GNA13	Guanine nucleotide-binding protein subunit alpha-13	73206.6
NDUA9_HUMAN	Q16795	Q16795	NDUFA9	NADH dehydrogenase [ubiquinone] 1 alpha subcomplex subunit 9, mitochondrial	73175.4
CTNB1_HUMAN	P35222	P35222	CTNNB1	Catenin beta-1	73130.5
SYSC_HUMAN	P49591	P49591	SARS1	Serine--tRNA ligase, cytoplasmic	73089.9
ITA1_HUMAN	P56199	P56199	ITGA1	Integrin alpha-1	73052.4
LSM3_HUMAN	P62310	P62310	LSM3	U6 snRNA-associated Sm-like protein LSm3	72928.8
CO5A2_HUMAN	P05997	P05997	COL5A2	Collagen alpha-2(V) chain	72740.9
NDUV2_HUMAN	P19404	P19404	NDUFV2	NADH dehydrogenase [ubiquinone] flavoprotein 2, mitochondrial	72720.9
PLIN3_HUMAN	O60664	O60664	PLIN3	Perilipin-3	72457.9
RAP1B_HUMAN	P61224;A6NIZ1	P61224	RAP1B	Ras-related protein Rap-1b	72447.8
ILK_HUMAN	Q13418	Q13418	ILK	Integrin-linked protein kinase	72420.8
NEST_HUMAN	P48681	P48681	NES	Nestin	72366.6
MOB1A_HUMAN;MOB1B_HUMAN	Q7L9L4;Q9H8S9	Q7L9L4;Q9H8S9	MOB1A;MOB1B	MOB kinase activator 1B	72290.8
DEK_HUMAN	P35659	P35659	DEK	Protein DEK	72263.8
C1S_HUMAN	P09871	P09871	C1S	Complement C1s subcomponent	72246
VASP_HUMAN	P50552	P50552	VASP	Vasodilator-stimulated phosphoprotein	72044.1
SYEP_HUMAN	P07814	P07814	EPRS1	Bifunctional glutamate/proline--tRNA ligase	72031.8
SLIRP_HUMAN	Q9GZT3	Q9GZT3	SLIRP	SRA stem-loop-interacting RNA-binding protein, mitochondrial	72001.8
VAMP5_HUMAN	O95183	O95183	VAMP5	Vesicle-associated membrane protein 5	71905.1
ERAP1_HUMAN	Q9NZ08	Q9NZ08	ERAP1	Endoplasmic reticulum aminopeptidase 1	71883.4
OVGP1_HUMAN	Q12889	Q12889	OVGP1	Oviduct-specific glycoprotein	71865.4
SYPL1_HUMAN	Q16563	Q16563	SYPL1	Synaptophysin-like protein 1	71860.4
SKP1_HUMAN	P63208	P63208	SKP1	S-phase kinase-associated protein 1	71609.6
RBM3_HUMAN	P98179	P98179	RBM3	RNA-binding protein 3	71609.1
RS27_HUMAN	P42677;Q71UM5	P42677	RPS27	Small ribosomal subunit protein eS27	71584.4
ARMX1_HUMAN	Q9P291	Q9P291	ARMCX1	Armadillo repeat-containing X-linked protein 1	71551.2
SAM50_HUMAN	Q9Y512	Q9Y512	SAMM50	Sorting and assembly machinery component 50 homolog	71478.5
QKI_HUMAN	Q96PU8	Q96PU8	QKI	KH domain-containing RNA-binding protein QKI	71338.9
SRS10_HUMAN	O75494	O75494	SRSF10	Serine/arginine-rich splicing factor 10	71286.7
VA0D1_HUMAN	P61421	P61421	ATP6V0D1	V-type proton ATPase subunit d 1	71206.2
MYCPP_HUMAN	Q7Z401	Q7Z401	DENND4A	C-myc promoter-binding protein	71157.6
NDKB_HUMAN	O60361;P22392	P22392	NME2	Nucleoside diphosphate kinase B	70778.1
UBQL1_HUMAN	Q9UMX0	Q9UMX0	UBQLN1	Ubiquilin-1	70571.6
GAL3A_HUMAN;GAL3B_HUMAN	P0DPI2;A0A0B4J2D5	A0A0B4J2D5;P0DPI2	GATD3;GATD3B	Putative glutamine amidotransferase-like class 1 domain-containing protein 3B, mitochondrial	70566.4
ITB4_HUMAN	P16144	P16144	ITGB4	Integrin beta-4	70506.3
THOC4_HUMAN	Q86V81	Q86V81	ALYREF	THO complex subunit 4	70501.2
NEDD8_HUMAN	Q15843	Q15843	NEDD8	NEDD8	70481.6
SEP11_HUMAN	Q9NVA2;Q92599;Q14141	Q9NVA2	SEPTIN11	Septin-11	70344.1
PSB8_HUMAN	P28062	P28062	PSMB8	Proteasome subunit beta type-8	70180.2
ERP29_HUMAN	P30040	P30040	ERP29	Endoplasmic reticulum resident protein 29	69990.2
COPG1_HUMAN	Q9Y678;Q9UBF2	Q9Y678	COPG1	Coatomer subunit gamma-1	69968.5
SC22B_HUMAN	O75396	O75396	SEC22B	Vesicle-trafficking protein SEC22b	69924.8
AOXA_HUMAN	Q06278	Q06278	AOX1	Aldehyde oxidase	69919.4
STXB5_HUMAN	Q5T5C0	Q5T5C0	STXBP5	Syntaxin-binding protein 5	69900.4
ACS2L_HUMAN	Q9NUB1	Q9NUB1	ACSS1	Acetyl-coenzyme A synthetase 2-like, mitochondrial	69876.8
C1TC_HUMAN	P11586	P11586	MTHFD1	C-1-tetrahydrofolate synthase, cytoplasmic	69824.5
STMN1_HUMAN	P16949	P16949	STMN1	Stathmin	69793
SQOR_HUMAN	Q9Y6N5	Q9Y6N5	SQOR	Sulfide:quinone oxidoreductase, mitochondrial	69522.6
GSHB_HUMAN	P48637	P48637	GSS	Glutathione synthetase	69521.5
IDH3A_HUMAN	P50213	P50213	IDH3A	Isocitrate dehydrogenase [NAD] subunit alpha, mitochondrial	69478.8
DDB1_HUMAN	Q16531	Q16531	DDB1	DNA damage-binding protein 1	69444.1
GSHR_HUMAN	P00390	P00390	GSR	Glutathione reductase, mitochondrial	69423.2
MATN2_HUMAN	O00339	O00339	MATN2	Matrilin-2	69284.8
SF01_HUMAN	Q15637	Q15637	SF1	Splicing factor 1	69277.1
DESP_HUMAN	P15924	P15924	DSP	Desmoplakin	69260.2
TPPC3_HUMAN	O43617	O43617	TRAPPC3	Trafficking protein particle complex subunit 3	69216.9
FA12_HUMAN	P00748	P00748	F12	Coagulation factor XII	69186.6
XPO1_HUMAN	O14980	O14980	XPO1	Exportin-1	69069.5
COX5B_HUMAN	P10606	P10606	COX5B	Cytochrome c oxidase subunit 5B, mitochondrial	69057.5
FCL_HUMAN	Q13630	Q13630	GFUS	GDP-L-fucose synthase	68957.6
IPYR2_HUMAN	Q9H2U2	Q9H2U2	PPA2	Inorganic pyrophosphatase 2, mitochondrial	68926.1
UBC12_HUMAN	P61081	P61081	UBE2M	NEDD8-conjugating enzyme Ubc12	68908.6
NACC1_HUMAN	Q96RE7	Q96RE7	NACC1	Nucleus accumbens-associated protein 1	68818.9
SH3G1_HUMAN	Q99961;Q99962	Q99961	SH3GL1	Endophilin-A2	68809.6
E41L2_HUMAN	O43491	O43491	EPB41L2	Band 4.1-like protein 2	68736.6
NIPS2_HUMAN	O75323	O75323	NIPSNAP2	Protein NipSnap homolog 2	68631.7
ACTZ_HUMAN	P61163	P61163	ACTR1A	Alpha-centractin	68614.6
HV349_HUMAN	A0A0B4J1V6;A0A0A0MS15	A0A0A0MS15	IGHV3-49	Immunoglobulin heavy variable 3-49	68519.9
HEXB_HUMAN	P07686	P07686	HEXB	Beta-hexosaminidase subunit beta	68298.6
TRIPC_HUMAN	Q14669	Q14669	TRIP12	E3 ubiquitin-protein ligase TRIP12	68254.7
UFL1_HUMAN	Q92845;O94874	O94874	UFL1	E3 UFM1-protein ligase 1	68159.1
PEDF_HUMAN	P36955	P36955	SERPINF1	Pigment epithelium-derived factor	68069.5
TXNL1_HUMAN	O43396	O43396	TXNL1	Thioredoxin-like protein 1	68020.6
NDUS3_HUMAN	O75489	O75489	NDUFS3	NADH dehydrogenase [ubiquinone] iron-sulfur protein 3, mitochondrial	67949.6
NHRF1_HUMAN	O14745	O14745	NHERF1	Na(+)/H(+) exchange regulatory cofactor NHE-RF1	67733.4
TRAP1_HUMAN	Q12931	Q12931	TRAP1	Heat shock protein 75 kDa, mitochondrial	67717
RAB2A_HUMAN	P61019;Q8WUD1	P61019	RAB2A	Ras-related protein Rab-2A	67654.6
HYI_HUMAN	Q5T013	Q5T013	HYI	Putative hydroxypyruvate isomerase	67403.4
ICAL_HUMAN	P20810	P20810	CAST	Calpastatin	67400.6
CTNA1_HUMAN	P35221;P26232	P35221	CTNNA1	Catenin alpha-1	67322.4
GUAA_HUMAN	P49915	P49915	GMPS	GMP synthase [glutamine-hydrolyzing]	67158
EPIPL_HUMAN	P58107	P58107	EPPK1	Epiplakin	67144.7
PLST_HUMAN	P13797	P13797	PLS3	Plastin-3	67130.2
HNRH2_HUMAN	P55795	P55795	HNRNPH2	Heterogeneous nuclear ribonucleoprotein H2	66971.8
ODPB_HUMAN	P11177	P11177	PDHB	Pyruvate dehydrogenase E1 component subunit beta, mitochondrial	66955.8
PARVA_HUMAN	Q9NVD7	Q9NVD7	PARVA	Alpha-parvin	66915.6
NC2B_HUMAN	Q01658	Q01658	DR1	Protein Dr1	66901.1
TWF1_HUMAN	Q12792	Q12792	TWF1	Twinfilin-1	66826.6
PP1R7_HUMAN	Q15435	Q15435	PPP1R7	Protein phosphatase 1 regulatory subunit 7	66778
MCTS1_HUMAN	Q9ULC4;A0A3B3IRV3	Q9ULC4	MCTS1	Malignant T-cell-amplified sequence 1	66727.1
UBP5_HUMAN	P45974	P45974	USP5	Ubiquitin carboxyl-terminal hydrolase 5	66689.7
FPRP_HUMAN	Q9P2B2	Q9P2B2	PTGFRN	Prostaglandin F2 receptor negative regulator	66678.2
MK14_HUMAN	Q16539	Q16539	MAPK14	Mitogen-activated protein kinase 14	66660.4
WFS1_HUMAN	O76024	O76024	WFS1	Wolframin	66560.4
ETFA_HUMAN	P13804	P13804	ETFA	Electron transfer flavoprotein subunit alpha, mitochondrial	66501.1
GTF2I_HUMAN	P78347	P78347	GTF2I	General transcription factor II-I	66483.9
BUB3_HUMAN	O43684	O43684	BUB3	Mitotic checkpoint protein BUB3	66226.5
PSMD9_HUMAN	O00233	O00233	PSMD9	26S proteasome non-ATPase regulatory subunit 9	66151.2
DCPS_HUMAN	Q96C86	Q96C86	DCPS	m7GpppX diphosphatase	65998.2
HPCL1_HUMAN	P37235	P37235	HPCAL1	Hippocalcin-like protein 1	65994.4
UB2D2_HUMAN	P62837;P61077	P62837	UBE2D2	Ubiquitin-conjugating enzyme E2 D2	65966.6
TMX1_HUMAN	Q9H3N1	Q9H3N1	TMX1	Thioredoxin-related transmembrane protein 1	65921.4
MARE1_HUMAN	Q15691	Q15691	MAPRE1	Microtubule-associated protein RP/EB family member 1	65894.3
HYAS1_HUMAN	Q92839	Q92839	HAS1	Hyaluronan synthase 1	65853.6
LPPRC_HUMAN	P42704	P42704	LRPPRC	Leucine-rich PPR motif-containing protein, mitochondrial	65623.5
NH2L1_HUMAN	P55769	P55769	SNU13	NHP2-like protein 1	65622.9
CMBL_HUMAN	Q96DG6	Q96DG6	CMBL	Carboxymethylenebutenolidase homolog	65577.3
SC31A_HUMAN	O94979	O94979	SEC31A	Protein transport protein Sec31A	65400.1
APOD_HUMAN	P05090	P05090	APOD	Apolipoprotein D	65273.2
SODC_HUMAN	P00441	P00441	SOD1	Superoxide dismutase [Cu-Zn]	65052.5
SEPT8_HUMAN	Q92599	Q92599	SEPTIN8	Septin-8	64919.7
ACPH_HUMAN	P13798	P13798	APEH	Acylamino-acid-releasing enzyme	64712.6
LYAG_HUMAN	P10253	P10253	GAA	Lysosomal alpha-glucosidase	64712
DDX5_HUMAN	P17844	P17844	DDX5	Probable ATP-dependent RNA helicase DDX5	64709
C1QB_HUMAN	P02746	P02746	C1QB	Complement C1q subcomponent subunit B	64592.8
HS12A_HUMAN	O43301	O43301	HSPA12A	Heat shock 70 kDa protein 12A	64538.7
SSRA_HUMAN	P43307	P43307	SSR1	Translocon-associated protein subunit alpha	64518.3
NDUS8_HUMAN	O00217	O00217	NDUFS8	NADH dehydrogenase [ubiquinone] iron-sulfur protein 8, mitochondrial	64503.2
PSB9_HUMAN	P28065	P28065	PSMB9	Proteasome subunit beta type-9	64274.9
ISOC1_HUMAN	Q96CN7	Q96CN7	ISOC1	Isochorismatase domain-containing protein 1	64272.7
ERF1_HUMAN	P62495	P62495	ETF1	Eukaryotic peptide chain release factor subunit 1	64271.2
COX41_HUMAN	P13073	P13073	COX4I1	Cytochrome c oxidase subunit 4 isoform 1, mitochondrial	64251.7
SYNC_HUMAN	O43776	O43776	NARS1	Asparagine--tRNA ligase, cytoplasmic	64159.3
ITA6_HUMAN	P23229	P23229	ITGA6	Integrin alpha-6	64099
LYPA1_HUMAN	O75608	O75608	LYPLA1	Acyl-protein thioesterase 1	64051.6
MYH10_HUMAN	P35580;Q7Z406	P35580	MYH10	Myosin-10	64024.4
HYDIN_HUMAN	Q4G0P3	Q4G0P3	HYDIN	Hydrocephalus-inducing protein homolog	63912.7
PKP4_HUMAN	Q99569	Q99569	PKP4	Plakophilin-4	63893
PSA7_HUMAN	O14818	O14818	PSMA7	Proteasome subunit alpha type-7	63851.4
SSDH_HUMAN	P51649	P51649	ALDH5A1	Succinate-semialdehyde dehydrogenase, mitochondrial	63771.6
ROAA_HUMAN	Q99729	Q99729	HNRNPAB	Heterogeneous nuclear ribonucleoprotein A/B	63618.5
PRS8_HUMAN	P62195	P62195	PSMC5	26S proteasome regulatory subunit 8	63572.2
SAFB1_HUMAN	Q15424	Q15424	SAFB	Scaffold attachment factor B1	63545.5
PDC6I_HUMAN	Q8WUM4	Q8WUM4	PDCD6IP	Programmed cell death 6-interacting protein	63538.5
TMX4_HUMAN	Q9H1E5	Q9H1E5	TMX4	Thioredoxin-related transmembrane protein 4	63491.9
TXTP_HUMAN	P53007	P53007	SLC25A1	Tricarboxylate transport protein, mitochondrial	63471.8
LYRIC_HUMAN	Q86UE4	Q86UE4	MTDH	Protein LYRIC	63310.7
RMD3_HUMAN	Q96TC7	Q96TC7	RMDN3	Regulator of microtubule dynamics protein 3	63244.6
CK054_HUMAN	Q9H0W9	Q9H0W9	C11orf54	Ester hydrolase C11orf54	63123.2
DRC4_HUMAN	O95995	O95995	GAS8	Dynein regulatory complex subunit 4	62910.9
CYRIB_HUMAN	Q9NUQ9	Q9NUQ9	CYRIB	CYFIP-related Rac1 interactor B	62855.9
CAP7_HUMAN	P20160	P20160	AZU1	Azurocidin	62818.2
TCEA1_HUMAN	Q15560;P23193	P23193	TCEA1	Transcription elongation factor A protein 1	62725.8
PTBP1_HUMAN	P26599	P26599	PTBP1	Polypyrimidine tract-binding protein 1	62517.8
ISLR_HUMAN	O14498	O14498	ISLR	Immunoglobulin superfamily containing leucine-rich repeat protein	62482.3
VPS52_HUMAN	Q8N1B4	Q8N1B4	VPS52	Vacuolar protein sorting-associated protein 52 homolog	62457.1
EIF3E_HUMAN	P60228	P60228	EIF3E	Eukaryotic translation initiation factor 3 subunit E	62453.6
LMOD1_HUMAN	P29536	P29536	LMOD1	Leiomodin-1	62440.8
RN213_HUMAN	Q63HN8	Q63HN8	RNF213	E3 ubiquitin-protein ligase RNF213	62384.8
PGRP2_HUMAN	Q96PD5	Q96PD5	PGLYRP2	N-acetylmuramoyl-L-alanine amidase	62283.5
PODN_HUMAN	Q7Z5L7	Q7Z5L7	PODN	Podocan	62274.8
CAYP1_HUMAN	Q13938	Q13938	CAPS	Calcyphosin	62258
HINT2_HUMAN	Q9BX68	Q9BX68	HINT2	Adenosine 5'-monophosphoramidase HINT2	62176.5
NENF_HUMAN	Q9UMX5	Q9UMX5	NENF	Neudesin	61964.8
ASAH1_HUMAN	Q13510	Q13510	ASAH1	Acid ceramidase	61906.6
PDC10_HUMAN	Q9BUL8	Q9BUL8	PDCD10	Programmed cell death protein 10	61771.4
TYB4_HUMAN	P62328	P62328	TMSB4X	Thymosin beta-4	61764.1
NDUB4_HUMAN	O95168	O95168	NDUFB4	NADH dehydrogenase [ubiquinone] 1 beta subcomplex subunit 4	61644.5
PALM_HUMAN	O75781	O75781	PALM	Paralemmin-1	61613.2
PIMT_HUMAN	P22061	P22061	PCMT1	Protein-L-isoaspartate(D-aspartate) O-methyltransferase	61530.7
TMOD1_HUMAN	P28289	P28289	TMOD1	Tropomodulin-1	61499.7
NSF1C_HUMAN	Q9UNZ2	Q9UNZ2	NSFL1C	NSFL1 cofactor p47	61363.8
VPS4B_HUMAN	O75351	O75351	VPS4B	Vacuolar protein sorting-associated protein 4B	61160.7
ACTN2_HUMAN	P35609	P35609	ACTN2	Alpha-actinin-2	61159.3
UBXN1_HUMAN	Q04323	Q04323	UBXN1	UBX domain-containing protein 1	61109.8
FKBP4_HUMAN	Q02790	Q02790	FKBP4	Peptidyl-prolyl cis-trans isomerase FKBP4	61022.4
CAD13_HUMAN	P55290	P55290	CDH13	Cadherin-13	60868.4
A1AG2_HUMAN	P19652	P19652	ORM2	Alpha-1-acid glycoprotein 2	60825.2
FA9_HUMAN	P00740	P00740	F9	Coagulation factor IX	60724
PP1B_HUMAN	P62140	P62140	PPP1CB	Serine/threonine-protein phosphatase PP1-beta catalytic subunit	60665.6
DCTN1_HUMAN	Q14203	Q14203	DCTN1	Dynactin subunit 1	60607
CRYAB_HUMAN	P02511	P02511	CRYAB	Alpha-crystallin B chain	60599.1
CATZ_HUMAN	Q9UBR2	Q9UBR2	CTSZ	Cathepsin Z	60538
IF4G1_HUMAN	Q04637	Q04637	EIF4G1	Eukaryotic translation initiation factor 4 gamma 1	60468.8
FUMH_HUMAN	P07954	P07954	FH	Fumarate hydratase, mitochondrial	60422
TLN2_HUMAN	Q9Y4G6	Q9Y4G6	TLN2	Talin-2	60404.8
KAP0_HUMAN	P10644	P10644	PRKAR1A	cAMP-dependent protein kinase type I-alpha regulatory subunit	60393.6
U520_HUMAN	O75643	O75643	SNRNP200	U5 small nuclear ribonucleoprotein 200 kDa helicase	60137.1
CP131_HUMAN	Q9UPN4	Q9UPN4	CEP131	Centrosomal protein of 131 kDa	60103.9
CY1_HUMAN	P08574	P08574	CYC1	Cytochrome c1, heme protein, mitochondrial	60095.8
ATD3A_HUMAN	Q9NVI7;Q5T9A4	Q9NVI7	ATAD3A	ATPase family AAA domain-containing protein 3A	60006.1
SNX5_HUMAN	Q9Y5X3	Q9Y5X3	SNX5	Sorting nexin-5	59979.6
PEF1_HUMAN	Q9UBV8	Q9UBV8	PEF1	Peflin	59901.1
BST2_HUMAN	Q10589	Q10589	BST2	Bone marrow stromal antigen 2	59866.4
EIF3B_HUMAN	P55884	P55884	EIF3B	Eukaryotic translation initiation factor 3 subunit B	59837.8
TCPH_HUMAN	Q99832	Q99832	CCT7	T-complex protein 1 subunit eta	59807.7
WASF2_HUMAN	Q9Y6W5	Q9Y6W5	WASF2	Actin-binding protein WASF2	59760.6
PP2BA_HUMAN	P16298;P48454;Q08209	Q08209	PPP3CA	Protein phosphatase 3 catalytic subunit alpha	59668.2
GNAS1_HUMAN	Q5JWF2	Q5JWF2	GNAS	Guanine nucleotide-binding protein G(s) subunit alpha isoforms XLas	59643.3
SRRM2_HUMAN	Q9UQ35	Q9UQ35	SRRM2	Serine/arginine repetitive matrix protein 2	59608.3
STX7_HUMAN	O15400	O15400	STX7	Syntaxin-7	59588.8
PMGE_HUMAN	P07738	P07738	BPGM	Bisphosphoglycerate mutase	59567.5
SRPX_HUMAN	P78539	P78539	SRPX	Sushi repeat-containing protein SRPX	59564.5
ILF2_HUMAN	Q12905	Q12905	ILF2	Interleukin enhancer-binding factor 2	59561.7
PDCD6_HUMAN	O75340	O75340	PDCD6	Programmed cell death protein 6	59558
RL5_HUMAN	P46777	P46777	RPL5	Large ribosomal subunit protein uL18	59517.3
AT2B4_HUMAN	P23634;P20020	P23634	ATP2B4	Plasma membrane calcium-transporting ATPase 4	59494.7
RU2A_HUMAN	P09661	P09661	SNRPA1	U2 small nuclear ribonucleoprotein A'	59450.8
TM109_HUMAN	Q9BVC6	Q9BVC6	TMEM109	Transmembrane protein 109	59448.3
RL29_HUMAN	P47914	P47914	RPL29	Large ribosomal subunit protein eL29	59444.5
MOGS_HUMAN	Q13724	Q13724	MOGS	Mannosyl-oligosaccharide glucosidase	59372.6
SNX12_HUMAN	Q9UMY4	Q9UMY4	SNX12	Sorting nexin-12	59353.6
HLAC_HUMAN	P10321	P10321	HLA-C	HLA class I histocompatibility antigen, C alpha chain	59332.9
GSTK1_HUMAN	Q9Y2Q3	Q9Y2Q3	GSTK1	Glutathione S-transferase kappa 1	59329.9
ITAM_HUMAN	P11215	P11215	ITGAM	Integrin alpha-M	59325.5
NDK3_HUMAN	Q13232	Q13232	NME3	Nucleoside diphosphate kinase 3	59293.5
PCOC1_HUMAN	Q15113	Q15113	PCOLCE	Procollagen C-endopeptidase enhancer 1	59285.6
RECQ1_HUMAN	P46063	P46063	RECQL	ATP-dependent DNA helicase Q1	59228
NIT1_HUMAN	Q86X76	Q86X76	NIT1	Deaminated glutathione amidase	59177.3
OLA1_HUMAN	Q9NTK5	Q9NTK5	OLA1	Obg-like ATPase 1	59092
NDUS5_HUMAN	O43920	O43920	NDUFS5	NADH dehydrogenase [ubiquinone] iron-sulfur protein 5	59068.6
PROF2_HUMAN	P35080	P35080	PFN2	Profilin-2	59053.2
PLAK_HUMAN	P14923	P14923	JUP	Junction plakoglobin	59050.1
PSA2_HUMAN	P25787	P25787	PSMA2	Proteasome subunit alpha type-2	58829.8
DHB4_HUMAN	P51659	P51659	HSD17B4	Peroxisomal multifunctional enzyme type 2	58822.9
PODXL_HUMAN	O00592	O00592	PODXL	Podocalyxin	58741.1
LSM8_HUMAN	O95777	O95777	LSM8	U6 snRNA-associated Sm-like protein LSm8	58723.2
VINEX_HUMAN	O60504	O60504	SORBS3	Vinexin	58688.3
AP1B1_HUMAN	Q10567	Q10567	AP1B1	AP-1 complex subunit beta-1	58630.1
ERGI1_HUMAN	Q969X5	Q969X5	ERGIC1	Endoplasmic reticulum-Golgi intermediate compartment protein 1	58604.9
ACOHC_HUMAN	P21399	P21399	ACO1	Cytoplasmic aconitate hydratase	58495.9
NDRG2_HUMAN	Q9UN36	Q9UN36	NDRG2	Protein NDRG2	58342.7
RPE_HUMAN	Q96AT9	Q96AT9	RPE	Ribulose-phosphate 3-epimerase	58299.1
FLOT1_HUMAN	O75955	O75955	FLOT1	Flotillin-1	58294.7
IGHG3_HUMAN	P01860	P01860	IGHG3	Immunoglobulin heavy constant gamma 3	58212.4
ANK1_HUMAN	P16157	P16157	ANK1	Ankyrin-1	58211.3
SC61B_HUMAN	P60468	P60468	SEC61B	Protein transport protein Sec61 subunit beta	58191.8
NU160_HUMAN	Q12769	Q12769	NUP160	Nuclear pore complex protein Nup160	58045.8
CD14_HUMAN	P08571	P08571	CD14	Monocyte differentiation antigen CD14	58010.6
CCS_HUMAN	O14618	O14618	CCS	Copper chaperone for superoxide dismutase	57996.3
FBLN3_HUMAN	Q12805	Q12805	EFEMP1	EGF-containing fibulin-like extracellular matrix protein 1	57992.4
PCCB_HUMAN	P05166	P05166	PCCB	Propionyl-CoA carboxylase beta chain, mitochondrial	57978.2
RAB14_HUMAN	P61106	P61106	RAB14	Ras-related protein Rab-14	57925.3
SF3B1_HUMAN	O75533	O75533	SF3B1	Splicing factor 3B subunit 1	57715.7
MRC2_HUMAN	Q9UBG0	Q9UBG0	MRC2	C-type mannose receptor 2	57697.1
MK15_HUMAN	Q8TD08	Q8TD08	MAPK15	Mitogen-activated protein kinase 15	57621.3
GLYM_HUMAN	P34897	P34897	SHMT2	Serine hydroxymethyltransferase, mitochondrial	57586.8
DHSO_HUMAN	Q00796	Q00796	SORD	Sorbitol dehydrogenase	57507.2
AS3MT_HUMAN	Q9HBK9	Q9HBK9	AS3MT	Arsenite methyltransferase	57375.8
SMRC2_HUMAN	Q8TAQ2	Q8TAQ2	SMARCC2	SWI/SNF complex subunit SMARCC2	57373.3
PFD2_HUMAN	Q9UHV9	Q9UHV9	PFDN2	Prefoldin subunit 2	57372.7
SAC1_HUMAN	Q9NTJ5	Q9NTJ5	SACM1L	Phosphatidylinositol-3-phosphatase SAC1	56981.4
SPCS2_HUMAN	Q15005	Q15005	SPCS2	Signal peptidase complex subunit 2	56917.2
PSB7_HUMAN	Q99436	Q99436	PSMB7	Proteasome subunit beta type-7	56911.9
CNN2_HUMAN	Q99439	Q99439	CNN2	Calponin-2	56766.3
KPRP_HUMAN	Q5T749	Q5T749	KPRP	Keratinocyte proline-rich protein	56681.7
CYC_HUMAN	P99999	P99999	CYCS	Cytochrome c	56677.6
AMPD2_HUMAN	Q01433	Q01433	AMPD2	AMP deaminase 2	56673.3
TADBP_HUMAN	Q13148	Q13148	TARDBP	TAR DNA-binding protein 43	56392.1
ANGT_HUMAN	P01019	P01019	AGT	Angiotensinogen	56371.6
UGGG1_HUMAN	Q9NYU2	Q9NYU2	UGGT1	UDP-glucose:glycoprotein glucosyltransferase 1	56328.4
DDX23_HUMAN	Q9BUQ8	Q9BUQ8	DDX23	Probable ATP-dependent RNA helicase DDX23	56323.4
HINT1_HUMAN	P49773	P49773	HINT1	Adenosine 5'-monophosphoramidase HINT1	56320.5
KAPCA_HUMAN	P22694;P17612	P17612	PRKACA	cAMP-dependent protein kinase catalytic subunit alpha	56252
HBG2_HUMAN	P69892	P69892	HBG2	Hemoglobin subunit gamma-2	56110.1
PPAL_HUMAN	P11117	P11117	ACP2	Lysosomal acid phosphatase	55995.2
TRA2A_HUMAN	Q13595	Q13595	TRA2A	Transformer-2 protein homolog alpha	55943.6
ALDOC_HUMAN	P09972	P09972	ALDOC	Fructose-bisphosphate aldolase C	55931.2
RASN_HUMAN	P01111;P01112	P01111	NRAS	GTPase NRas	55789
PCY1A_HUMAN	P49585	P49585	PCYT1A	Choline-phosphate cytidylyltransferase A	55775.3
RCC1_HUMAN	P18754	P18754	RCC1	Regulator of chromosome condensation	55749.8
DCTN3_HUMAN	O75935	O75935	DCTN3	Dynactin subunit 3	55698.8
PUR2_HUMAN	P22102	P22102	GART	Trifunctional purine biosynthetic protein adenosine-3	55689.8
CYH2_HUMAN	Q99418	Q99418	CYTH2	Cytohesin-2	55606.7
SPTB1_HUMAN	P11277	P11277	SPTB	Spectrin beta chain, erythrocytic	55579.4
ANM5_HUMAN	O14744	O14744	PRMT5	Protein arginine N-methyltransferase 5	55546.7
GALK1_HUMAN	P51570	P51570	GALK1	Galactokinase	55478.7
GPNMB_HUMAN	Q14956	Q14956	GPNMB	Transmembrane glycoprotein NMB	55454.4
PSB3_HUMAN	P49720	P49720	PSMB3	Proteasome subunit beta type-3	55380.2
TMEDA_HUMAN	P49755	P49755	TMED10	Transmembrane emp24 domain-containing protein 10	55296.8
CD47_HUMAN	Q08722	Q08722	CD47	Leukocyte surface antigen CD47	55079.2
OAT_HUMAN	P04181	P04181	OAT	Ornithine aminotransferase, mitochondrial	55075.4
CSK21_HUMAN	Q8NEV1;P68400	P68400	CSNK2A1	Casein kinase II subunit alpha	55040.8
GGT5_HUMAN	P36269	P36269	GGT5	Glutathione hydrolase 5 proenzyme	54949.3
PDLI4_HUMAN	P50479	P50479	PDLIM4	PDZ and LIM domain protein 4	54946.9
NDUS2_HUMAN	O75306	O75306	NDUFS2	NADH dehydrogenase [ubiquinone] iron-sulfur protein 2, mitochondrial	54915.7
C1QBP_HUMAN	Q07021	Q07021	C1QBP	Complement component 1 Q subcomponent-binding protein, mitochondrial	54874.1
SNX27_HUMAN	Q96L92	Q96L92	SNX27	Sorting nexin-27	54845.6
FBLN4_HUMAN	O95967	O95967	EFEMP2	EGF-containing fibulin-like extracellular matrix protein 2	54726.6
S10AD_HUMAN	Q99584	Q99584	S100A13	Protein S100-A13	54675
DSRAD_HUMAN	P55265	P55265	ADAR	Double-stranded RNA-specific adenosine deaminase	54629.5
BAG6_HUMAN	P46379	P46379	BAG6	Large proline-rich protein BAG6	54629.2
SLK_HUMAN	Q9H2G2	Q9H2G2	SLK	STE20-like serine/threonine-protein kinase	54521.9
DRA_HUMAN	P01903;P01906	P01903	HLA-DRA	HLA class II histocompatibility antigen, DR alpha chain	54521.4
UCHL3_HUMAN	P15374	P15374	UCHL3	Ubiquitin carboxyl-terminal hydrolase isozyme L3	54460.2
THEM6_HUMAN	Q8WUY1	Q8WUY1	THEM6	Protein THEM6	54456.7
HS12B_HUMAN	Q96MM6	Q96MM6	HSPA12B	Heat shock 70 kDa protein 12B	54432.9
EMAL6_HUMAN	Q6ZMW3	Q6ZMW3	EML6	Echinoderm microtubule-associated protein-like 6	54276.6
SAR1A_HUMAN	Q9Y6B6;Q9NR31	Q9NR31	SAR1A	GTP-binding protein SAR1a	54144.7
NDUV1_HUMAN	P49821	P49821	NDUFV1	NADH dehydrogenase [ubiquinone] flavoprotein 1, mitochondrial	54141.7
ODP2_HUMAN	P10515	P10515	DLAT	Dihydrolipoyllysine-residue acetyltransferase component of pyruvate dehydrogenase complex, mitochondrial	54139.8
G6PE_HUMAN	O95479	O95479	H6PD	GDH/6PGL endoplasmic bifunctional protein	54139.4
SRSF9_HUMAN	Q13242	Q13242	SRSF9	Serine/arginine-rich splicing factor 9	54103.6
CO4A_HUMAN	P0C0L4	P0C0L4	C4A	Complement C4-A	53974.5
APOC1_HUMAN	P02654	P02654	APOC1	Apolipoprotein C-I	53898
HGS_HUMAN	O14964	O14964	HGS	Hepatocyte growth factor-regulated tyrosine kinase substrate	53837.7
PFD1_HUMAN	O60925	O60925	PFDN1	Prefoldin subunit 1	53759.2
LEG7_HUMAN	P47929	P47929	LGALS7B	Galectin-7	53750.3
PERI_HUMAN	P41219	P41219	PRPH	Peripherin	53607.5
RL23A_HUMAN	P62750	P62750	RPL23A	Large ribosomal subunit protein uL23	53603.8
SUMO3_HUMAN	Q6EEV6;P61956;P55854	P55854	SUMO3	Small ubiquitin-related modifier 3	53544.8
KAIN_HUMAN	P29622	P29622	SERPINA4	Kallistatin	53516.2
RL23_HUMAN	P62829	P62829	RPL23	Large ribosomal subunit protein uL14	53511.2
DLRB1_HUMAN	Q9NP97;Q8TF09	Q9NP97	DYNLRB1	Dynein light chain roadblock-type 1	53349.4
CTL2_HUMAN	Q8IWA5	Q8IWA5	SLC44A2	Choline transporter-like protein 2	53295.3
SMCA5_HUMAN	O60264;P28370	O60264	SMARCA5	SWI/SNF-related matrix-associated actin-dependent regulator of chromatin subfamily A member 5	53175.2
RAB21_HUMAN	Q9UL25	Q9UL25	RAB21	Ras-related protein Rab-21	53019.8
SRRT_HUMAN	Q9BXP5	Q9BXP5	SRRT	Serrate RNA effector molecule homolog	52976.5
EFHD2_HUMAN	Q96C19	Q96C19	EFHD2	EF-hand domain-containing protein D2	52933.1
SYIM_HUMAN	Q9NSE4	Q9NSE4	IARS2	Isoleucine--tRNA ligase, mitochondrial	52919.4
LSM6_HUMAN	P62312	P62312	LSM6	U6 snRNA-associated Sm-like protein LSm6	52883.8
RABP2_HUMAN	P29373	P29373	CRABP2	Cellular retinoic acid-binding protein 2	52722.2
LV310_HUMAN	A0A075B6K4;A0A075B6K0	A0A075B6K4	IGLV3-10	Immunoglobulin lambda variable 3-10	52692
FLII_HUMAN	Q13045	Q13045	FLII	Protein flightless-1 homolog	52674.2
WDR81_HUMAN	Q562E7	Q562E7	WDR81	WD repeat-containing protein 81	52641.9
EHD3_HUMAN	Q9NZN3	Q9NZN3	EHD3	EH domain-containing protein 3	52629.9
SPCS3_HUMAN	P61009	P61009	SPCS3	Signal peptidase complex subunit 3	52537
SPTA1_HUMAN	P02549	P02549	SPTA1	Spectrin alpha chain, erythrocytic 1	52467.6
NCLN_HUMAN	Q969V3	Q969V3	NCLN	BOS complex subunit NCLN	52460.3
GALM_HUMAN	Q96C23	Q96C23	GALM	Galactose mutarotase	52448.2
EST1_HUMAN	P23141	P23141	CES1	Liver carboxylesterase 1	52444.4
PRS4_HUMAN	P62191	P62191	PSMC1	26S proteasome regulatory subunit 4	52305
EWS_HUMAN	Q01844	Q01844	EWSR1	RNA-binding protein EWS	52147.8
FKB1A_HUMAN	P62942	P62942	FKBP1A	Peptidyl-prolyl cis-trans isomerase FKBP1A	52024
TCRG1_HUMAN	O14776	O14776	TCERG1	Transcription elongation regulator 1	52012.1
SNX18_HUMAN	Q96RF0	Q96RF0	SNX18	Sorting nexin-18	51955.8
TENS2_HUMAN	Q63HR2	Q63HR2	TNS2	Tensin-2	51941.3
PTGR1_HUMAN	Q14914	Q14914	PTGR1	Prostaglandin reductase 1	51940.2
SF3A1_HUMAN	Q15459	Q15459	SF3A1	Splicing factor 3A subunit 1	51919.5
AN32B_HUMAN	Q92688	Q92688	ANP32B	Acidic leucine-rich nuclear phosphoprotein 32 family member B	51831.4
ECM1_HUMAN	Q16610	Q16610	ECM1	Extracellular matrix protein 1	51773.6
CAP2_HUMAN	P40123	P40123	CAP2	Adenylyl cyclase-associated protein 2	51700.5
PPCE_HUMAN	P48147	P48147	PREP	Prolyl endopeptidase	51666.7
EMIL3_HUMAN	Q9NT22	Q9NT22	EMILIN3	EMILIN-3	51632.5
QCR2_HUMAN	P22695	P22695	UQCRC2	Cytochrome b-c1 complex subunit 2, mitochondrial	51561.9
HCLS1_HUMAN	P14317	P14317	HCLS1	Hematopoietic lineage cell-specific protein	51560.7
AFG32_HUMAN	Q9Y4W6	Q9Y4W6	AFG3L2	AFG3-like protein 2	51490.8
MAMC2_HUMAN	Q7Z304	Q7Z304	MAMDC2	MAM domain-containing protein 2	51489.3
HV64D_HUMAN	A0A0J9YX35	A0A0J9YX35	IGHV3-64D	Immunoglobulin heavy variable 3-64D	51400.8
PABP4_HUMAN	Q13310	Q13310	PABPC4	Polyadenylate-binding protein 4	51370.2
CZIB_HUMAN	Q9NWV4	Q9NWV4	CZIB	CXXC motif containing zinc binding protein	51288.6
PREB_HUMAN	Q9HCU5	Q9HCU5	PREB	Prolactin regulatory element-binding protein	51249.5
ARHGH_HUMAN	Q96PE2	Q96PE2	ARHGEF17	Rho guanine nucleotide exchange factor 17	51235.4
3HAO_HUMAN	P46952	P46952	HAAO	3-hydroxyanthranilate 3,4-dioxygenase	51212.8
SYQ_HUMAN	P47897	P47897	QARS1	Glutamine--tRNA ligase	51125.2
TKFC_HUMAN	Q3LXA3	Q3LXA3	TKFC	Triokinase/FMN cyclase	51112.7
GOGA3_HUMAN	Q08378	Q08378	GOLGA3	Golgin subfamily A member 3	51095.1
CADH5_HUMAN	P33151	P33151	CDH5	Cadherin-5	51079
CRCC2_HUMAN	H7BZ55	H7BZ55	CROCC2	Ciliary rootlet coiled-coil protein 2	51077.8
PXDC2_HUMAN	Q6UX71	Q6UX71	PLXDC2	Plexin domain-containing protein 2	51064.2
XPO7_HUMAN	Q9UIA9	Q9UIA9	XPO7	Exportin-7	51026
ESYT2_HUMAN	A0FGR8	A0FGR8	ESYT2	Extended synaptotagmin-2	50974.6
DPP3_HUMAN	Q9NY33	Q9NY33	DPP3	Dipeptidyl peptidase 3	50850
PSMD2_HUMAN	Q13200	Q13200	PSMD2	26S proteasome non-ATPase regulatory subunit 2	50786.2
ENOG_HUMAN	P09104	P09104	ENO2	Gamma-enolase	50720.2
RB33B_HUMAN	Q9H082	Q9H082	RAB33B	Ras-related protein Rab-33B	50641.4
CD9_HUMAN	P21926	P21926	CD9	CD9 antigen	50589.9
DNM1L_HUMAN	O00429	O00429	DNM1L	Dynamin-1-like protein	50470.5
TSP3_HUMAN	P49746	P49746	THBS3	Thrombospondin-3	50459.8
KTN1_HUMAN	Q86UP2	Q86UP2	KTN1	Kinectin	50383.6
PLGT3_HUMAN	Q7Z4H8	Q7Z4H8	POGLUT3	Protein O-glucosyltransferase 3	50378.9
RANG_HUMAN	P43487	P43487	RANBP1	Ran-specific GTPase-activating protein	50310.4
PYR1_HUMAN	P27708	P27708	CAD	CAD protein	50156.3
FPPS_HUMAN	P14324	P14324	FDPS	Farnesyl pyrophosphate synthase	49992.3
NDUAA_HUMAN	O95299	O95299	NDUFA10	NADH dehydrogenase [ubiquinone] 1 alpha subcomplex subunit 10, mitochondrial	49991.8
PSD13_HUMAN	Q9UNM6	Q9UNM6	PSMD13	26S proteasome non-ATPase regulatory subunit 13	49935
M2OM_HUMAN	Q02978	Q02978	SLC25A11	Mitochondrial 2-oxoglutarate/malate carrier protein	49924.9
VPS29_HUMAN	Q9UBQ0	Q9UBQ0	VPS29	Vacuolar protein sorting-associated protein 29	49881.1
UFM1_HUMAN	P61960	P61960	UFM1	Ubiquitin-fold modifier 1	49872.3
GORS2_HUMAN	Q9H8Y8	Q9H8Y8	GORASP2	Golgi reassembly-stacking protein 2	49837.2
LV746_HUMAN	A0A075B6I9	A0A075B6I9	IGLV7-46	Immunoglobulin lambda variable 7-46	49822.1
PRS7_HUMAN	P35998	P35998	PSMC2	26S proteasome regulatory subunit 7	49802.6
SYLM_HUMAN	Q15031	Q15031	LARS2	Leucine--tRNA ligase, mitochondrial	49784.4
RL13A_HUMAN	Q6NVV1;P40429	P40429	RPL13A	Large ribosomal subunit protein uL13	49727.3
GSTM2_HUMAN	Q03013;P09488;P28161	P28161	GSTM2	Glutathione S-transferase Mu 2	49691.6
GNAO_HUMAN	P09471	P09471	GNAO1	Guanine nucleotide-binding protein G(o) subunit alpha	49618.7
PGFRB_HUMAN	P09619	P09619	PDGFRB	Platelet-derived growth factor receptor beta	49612.8
CD44_HUMAN	P16070	P16070	CD44	CD44 antigen	49592.3
CO8B_HUMAN	P07358	P07358	C8B	Complement component C8 beta chain	49573.5
TMM33_HUMAN	P57088	P57088	TMEM33	Transmembrane protein 33	49510.2
NFASC_HUMAN	O94856	O94856	NFASC	Neurofascin	49499.8
SYTC_HUMAN	P26639;A2RTX5	P26639	TARS1	Threonine--tRNA ligase 1, cytoplasmic	49364.6
ARPIN_HUMAN	Q7Z6K5	Q7Z6K5	ARPIN	Arpin	49364.3
DBNL_HUMAN	Q9UJU6	Q9UJU6	DBNL	Drebrin-like protein	49314.4
TB182_HUMAN	Q9C0C2	Q9C0C2	TNKS1BP1	182 kDa tankyrase-1-binding protein	49259.2
THTM_HUMAN	P25325	P25325	MPST	3-mercaptopyruvate sulfurtransferase	49192.9
KT3K_HUMAN	Q9HA64	Q9HA64	FN3KRP	Ketosamine-3-kinase	49190.8
KINH_HUMAN	O60282;P33176;Q12840	P33176	KIF5B	Kinesin-1 heavy chain	49124.1
CX6B1_HUMAN	P14854	P14854	COX6B1	Cytochrome c oxidase subunit 6B1	49062.2
EIF3I_HUMAN	Q13347	Q13347	EIF3I	Eukaryotic translation initiation factor 3 subunit I	49001.9
EIF3L_HUMAN	Q9Y262	Q9Y262	EIF3L	Eukaryotic translation initiation factor 3 subunit L	48956.3
UGPA_HUMAN	Q16851	Q16851	UGP2	UTP--glucose-1-phosphate uridylyltransferase	48904.8
MTCH1_HUMAN	Q9NZJ7	Q9NZJ7	MTCH1	Mitochondrial carrier homolog 1	48874.3
RPR1B_HUMAN	Q9NQG5	Q9NQG5	RPRD1B	Regulation of nuclear pre-mRNA domain-containing protein 1B	48854.2
ANXA3_HUMAN	P12429	P12429	ANXA3	Annexin A3	48823.4
RL11_HUMAN	P62913	P62913	RPL11	Large ribosomal subunit protein uL5	48782.8
ITA3_HUMAN	P26006	P26006	ITGA3	Integrin alpha-3	48781.6
PTMS_HUMAN	P20962	P20962	PTMS	Parathymosin	48737.4
S2512_HUMAN	O75746	O75746	SLC25A12	Electrogenic aspartate/glutamate antiporter SLC25A12, mitochondrial	48707.9
DDRGK_HUMAN	Q96HY6	Q96HY6	DDRGK1	DDRGK domain-containing protein 1	48701
MFS10_HUMAN	Q14728	Q14728	MFSD10	Major facilitator superfamily domain-containing protein 10	48687.5
PLD3_HUMAN	Q8IV08	Q8IV08	PLD3	5'-3' exonuclease PLD3	48685.7
VAPA_HUMAN	Q9P0L0	Q9P0L0	VAPA	Vesicle-associated membrane protein-associated protein A	48623.3
USO1_HUMAN	O60763	O60763	USO1	General vesicular transport factor p115	48549.5
DJB11_HUMAN	Q9UBS4	Q9UBS4	DNAJB11	DnaJ homolog subfamily B member 11	48477.6
KCD16_HUMAN	Q68DU8	Q68DU8	KCTD16	BTB/POZ domain-containing protein KCTD16	48356.7
URP2_HUMAN	Q86UX7	Q86UX7	FERMT3	Fermitin family homolog 3	48209.8
SKT_HUMAN	Q5T5P2	Q5T5P2	KIAA1217	Sickle tail protein homolog	48199.1
DCUP_HUMAN	P06132	P06132	UROD	Uroporphyrinogen decarboxylase	48160.9
MIER1_HUMAN	Q8N108	Q8N108	MIER1	Mesoderm induction early response protein 1	48114.3
PNPH_HUMAN	P00491	P00491	PNP	Purine nucleoside phosphorylase	48069.8
SYMC_HUMAN	P56192	P56192	MARS1	Methionine--tRNA ligase, cytoplasmic	47989.4
AIFM1_HUMAN	O95831	O95831	AIFM1	Apoptosis-inducing factor 1, mitochondrial	47926.2
GPD1L_HUMAN	Q8N335	Q8N335	GPD1L	Glycerol-3-phosphate dehydrogenase 1-like protein	47856
UCHL1_HUMAN	P09936	P09936	UCHL1	Ubiquitin carboxyl-terminal hydrolase isozyme L1	47819.6
CPSF6_HUMAN	Q16630	Q16630	CPSF6	Cleavage and polyadenylation specificity factor subunit 6	47720.7
PSDE_HUMAN	O00487	O00487	PSMD14	26S proteasome non-ATPase regulatory subunit 14	47712.4
CLCB_HUMAN	P09497	P09497	CLTB	Clathrin light chain B	47649.7
PRP19_HUMAN	Q9UMS4	Q9UMS4	PRPF19	Pre-mRNA-processing factor 19	47603.6
ZN207_HUMAN	O43670	O43670	ZNF207	BUB3-interacting and GLEBS motif-containing protein ZNF207	47591.1
TRI47_HUMAN	Q96LD4	Q96LD4	TRIM47	E3 ubiquitin-protein ligase TRIM47	47561.2
VWF_HUMAN	P04275	P04275	VWF	von Willebrand factor	47552.5
LIPP_HUMAN	P16233	P16233	PNLIP	Pancreatic triacylglycerol lipase	47548.3
ITPI2_HUMAN	P28290	P28290	ITPRID2	Protein ITPRID2	47534.4
ARL8B_HUMAN	Q9NVJ2;Q96BM9	Q9NVJ2	ARL8B	ADP-ribosylation factor-like protein 8B	47515.1
A0A0G2JRQ6_HUMAN	A0A0G2JRQ6	A0A0G2JRQ6		Ig-like domain-containing protein (Fragment)	47450.9
S2513_HUMAN	Q9UJS0	Q9UJS0	SLC25A13	Electrogenic aspartate/glutamate antiporter SLC25A13, mitochondrial	47407.9
LIS1_HUMAN	P43034	P43034	PAFAH1B1	Platelet-activating factor acetylhydrolase IB subunit beta	47392.3
DPY30_HUMAN	Q9C005	Q9C005	DPY30	Protein dpy-30 homolog	47371.9
CK068_HUMAN	Q9H3H3	Q9H3H3	C11orf68	UPF0696 protein C11orf68	47365.6
STA5B_HUMAN	P51692	P51692	STAT5B	Signal transducer and activator of transcription 5B	47310.5
ASGL1_HUMAN	Q7L266	Q7L266	ASRGL1	Isoaspartyl peptidase/L-asparaginase	47233.2
CALL5_HUMAN	Q9NZT1	Q9NZT1	CALML5	Calmodulin-like protein 5	47227.2
BLMH_HUMAN	Q13867	Q13867	BLMH	Bleomycin hydrolase	47208.2
CO6_HUMAN	P13671	P13671	C6	Complement component C6	47204.8
SERB1_HUMAN	Q8NC51	Q8NC51	SERBP1	SERPINE1 mRNA-binding protein 1	47140.2
IST1_HUMAN	P53990	P53990	IST1	IST1 homolog	47083.7
RL10_HUMAN	P27635	P27635	RPL10	Large ribosomal subunit protein uL16	47079.2
MIC19_HUMAN	Q9NX63	Q9NX63	CHCHD3	MICOS complex subunit MIC19	47062
IF4A2_HUMAN	Q14240	Q14240	EIF4A2	Eukaryotic initiation factor 4A-II	47037.4
IF2A_HUMAN	P05198	P05198	EIF2S1	Eukaryotic translation initiation factor 2 subunit 1	47032.6
XRN2_HUMAN	Q9H0D6	Q9H0D6	XRN2	5'-3' exoribonuclease 2	47016.9
RAB5B_HUMAN	P61020	P61020	RAB5B	Ras-related protein Rab-5B	46958.8
TNPO1_HUMAN	Q92973	Q92973	TNPO1	Transportin-1	46948
SRC_HUMAN	P12931;P07947;P06241	P12931	SRC	Proto-oncogene tyrosine-protein kinase Src	46913.5
NP1L1_HUMAN	P55209	P55209	NAP1L1	Nucleosome assembly protein 1-like 1	46911.8
CDK1_HUMAN	P06493	P06493	CDK1	Cyclin-dependent kinase 1	46891.7
NXN_HUMAN	Q6DKJ4	Q6DKJ4	NXN	Nucleoredoxin	46879.4
RALB_HUMAN	P11234	P11234	RALB	Ras-related protein Ral-B	46865.3
DHRS6_HUMAN	Q9BUT1	Q9BUT1	BDH2	Dehydrogenase/reductase SDR family member 6	46847.6
UBR4_HUMAN	Q5T4S7	Q5T4S7	UBR4	E3 ubiquitin-protein ligase UBR4	46841.9
MYG1_HUMAN	Q9HB07	Q9HB07	MYG1	MYG1 exonuclease	46831.1
DNPH1_HUMAN	O43598	O43598	DNPH1	2'-deoxynucleoside 5'-phosphate N-hydrolase 1	46752.8
OGT1_HUMAN	O15294	O15294	OGT	UDP-N-acetylglucosamine--peptide N-acetylglucosaminyltransferase 110 kDa subunit	46747
CNOT1_HUMAN	A5YKK6	A5YKK6	CNOT1	CCR4-NOT transcription complex subunit 1	46716.7
APOC3_HUMAN	P02656	P02656	APOC3	Apolipoprotein C-III	46605.2
ASPH_HUMAN	Q12797	Q12797	ASPH	Aspartyl/asparaginyl beta-hydroxylase	46593.2
DHB12_HUMAN	Q53GQ0	Q53GQ0	HSD17B12	Very-long-chain 3-oxoacyl-CoA reductase	46585.9
EIF3J_HUMAN	O75822	O75822	EIF3J	Eukaryotic translation initiation factor 3 subunit J	46561.5
ACBP_HUMAN	P07108	P07108	DBI	Acyl-CoA-binding protein	46552
HSP72_HUMAN	P54652	P54652	HSPA2	Heat shock-related 70 kDa protein 2	46537.3
TPR_HUMAN	P12270	P12270	TPR	Nucleoprotein TPR	46505.2
TNC18_HUMAN	O15417	O15417	TNRC18	Trinucleotide repeat-containing gene 18 protein	46346.4
SRP09_HUMAN	P49458	P49458	SRP9	Signal recognition particle 9 kDa protein	46344.2
PUR8_HUMAN	P30566	P30566	ADSL	Adenylosuccinate lyase	46331.2
PCNA_HUMAN	P12004	P12004	PCNA	Proliferating cell nuclear antigen	46323.3
PSMD7_HUMAN	P51665	P51665	PSMD7	26S proteasome non-ATPase regulatory subunit 7	46258.6
FKBP9_HUMAN	O95302	O95302	FKBP9	Peptidyl-prolyl cis-trans isomerase FKBP9	46232.9
RCN3_HUMAN	Q96D15	Q96D15	RCN3	Reticulocalbin-3	46187.7
RAB35_HUMAN	Q15286	Q15286	RAB35	Ras-related protein Rab-35	46139.8
PBIP1_HUMAN	Q96AQ6	Q96AQ6	PBXIP1	Pre-B-cell leukemia transcription factor-interacting protein 1	46134.9
VWA1_HUMAN	Q6PCB0	Q6PCB0	VWA1	von Willebrand factor A domain-containing protein 1	46050.6
SGMR1_HUMAN	Q99720	Q99720	SIGMAR1	Sigma non-opioid intracellular receptor 1	45907.4
HYES_HUMAN	P34913	P34913	EPHX2	Bifunctional epoxide hydrolase 2	45870.5
ERG24_HUMAN	O76062	O76062	TM7SF2	Delta(14)-sterol reductase TM7SF2	45845.9
PRP8_HUMAN	Q6P2Q9	Q6P2Q9	PRPF8	Pre-mRNA-processing-splicing factor 8	45837.4
IMDH2_HUMAN	P12268	P12268	IMPDH2	Inosine-5'-monophosphate dehydrogenase 2	45814.5
CPSF5_HUMAN	O43809	O43809	NUDT21	Cleavage and polyadenylation specificity factor subunit 5	45807.1
COMT_HUMAN	P21964	P21964	COMT	Catechol O-methyltransferase	45804.1
TBCB_HUMAN	Q99426	Q99426	TBCB	Tubulin-folding cofactor B	45724.5
FAF2_HUMAN	Q96CS3	Q96CS3	FAF2	FAS-associated factor 2	45622.6
WDFY1_HUMAN	Q8IWB7	Q8IWB7	WDFY1	WD repeat and FYVE domain-containing protein 1	45402.8
STAT3_HUMAN	P40763	P40763	STAT3	Signal transducer and activator of transcription 3	45392.8
TRXR1_HUMAN	Q16881	Q16881	TXNRD1	Thioredoxin reductase 1, cytoplasmic	45340.4
CBPB2_HUMAN	Q96IY4	Q96IY4	CPB2	Carboxypeptidase B2	45310.3
SHLB2_HUMAN	Q9NR46	Q9NR46	SH3GLB2	Endophilin-B2	45286.2
IMPA1_HUMAN	P29218	P29218	IMPA1	Inositol monophosphatase 1	45249.7
CSK2B_HUMAN	P67870	P67870	CSNK2B	Casein kinase II subunit beta	45233
THY1_HUMAN	P04216	P04216	THY1	Thy-1 membrane glycoprotein	45127.5
THIC_HUMAN	Q9BWD1	Q9BWD1	ACAT2	Acetyl-CoA acetyltransferase, cytosolic	45125.1
NOMO1_HUMAN	Q5JPE7;P69849;Q15155	Q15155	NOMO1	BOS complex subunit NOMO1	45101.6
HUWE1_HUMAN	Q7Z6Z7	Q7Z6Z7	HUWE1	E3 ubiquitin-protein ligase HUWE1	45101.5
AFAM_HUMAN	P43652	P43652	AFM	Afamin	45027.5
RBM8A_HUMAN	Q9Y5S9	Q9Y5S9	RBM8A	RNA-binding protein 8A	45020.4
KCY_HUMAN	P30085	P30085	CMPK1	UMP-CMP kinase	44994.5
PSMD1_HUMAN	Q99460	Q99460	PSMD1	26S proteasome non-ATPase regulatory subunit 1	44953.2
DERL1_HUMAN	Q9BUN8	Q9BUN8	DERL1	Derlin-1	44943.8
MAOM_HUMAN	P23368	P23368	ME2	NAD-dependent malic enzyme, mitochondrial	44924.3
HV330_HUMAN;HVC05_HUMAN	P01768;A0A0J9YY99;P01772;P0DP03	P01768;P0DP03	IGHV3-30;IGHV3-30-5	Immunoglobulin heavy variable 3-30	44874
DYN3_HUMAN	Q9UQ16	Q9UQ16	DNM3	Dynamin-3	44822.2
EGLN_HUMAN	P17813	P17813	ENG	Endoglin	44819.6
MGN2_HUMAN;MGN_HUMAN	Q96A72;P61326	P61326;Q96A72	MAGOH;MAGOHB	Protein mago nashi homolog	44698.2
VMA5A_HUMAN	O00534	O00534	VWA5A	von Willebrand factor A domain-containing protein 5A	44672.7
GLO2_HUMAN	Q16775	Q16775	HAGH	Hydroxyacylglutathione hydrolase, mitochondrial	44667
ANFY1_HUMAN	Q9P2R3	Q9P2R3	ANKFY1	Rabankyrin-5	44633.9
HNMT_HUMAN	P50135	P50135	HNMT	Histamine N-methyltransferase	44633.8
IF2G_HUMAN	Q2VIR3;P41091	P41091	EIF2S3	Eukaryotic translation initiation factor 2 subunit 3	44552.4
CSN6_HUMAN	Q7L5N1	Q7L5N1	COPS6	COP9 signalosome complex subunit 6	44481.8
PRS6B_HUMAN	P43686	P43686	PSMC4	26S proteasome regulatory subunit 6B	44454.9
ILKAP_HUMAN	Q9H0C8	Q9H0C8	ILKAP	Integrin-linked kinase-associated serine/threonine phosphatase 2C	44425.4
SUCB2_HUMAN	Q96I99	Q96I99	SUCLG2	Succinate--CoA ligase [GDP-forming] subunit beta, mitochondrial	44393.6
ARHG7_HUMAN	Q14155	Q14155	ARHGEF7	Rho guanine nucleotide exchange factor 7	44393.5
PSD11_HUMAN	O00231	O00231	PSMD11	26S proteasome non-ATPase regulatory subunit 11	44378.9
ASPG_HUMAN	P20933	P20933	AGA	N(4)-(beta-N-acetylglucosaminyl)-L-asparaginase	44351.3
TPPC9_HUMAN	Q96Q05	Q96Q05	TRAPPC9	Trafficking protein particle complex subunit 9	44188.1
DREB_HUMAN	Q16643	Q16643	DBN1	Drebrin	44179.2
RFA1_HUMAN	P27694	P27694	RPA1	Replication protein A 70 kDa DNA-binding subunit	43972.9
G3BP1_HUMAN	Q13283	Q13283	G3BP1	Ras GTPase-activating protein-binding protein 1	43953.4
NAMPT_HUMAN	P43490	P43490	NAMPT	Nicotinamide phosphoribosyltransferase	43872.5
SRP14_HUMAN	P37108	P37108	SRP14	Signal recognition particle 14 kDa protein	43843.8
KBTBB_HUMAN	O94819	O94819	KBTBD11	Kelch repeat and BTB domain-containing protein 11	43826.8
LTOR1_HUMAN	Q6IAA8	Q6IAA8	LAMTOR1	Ragulator complex protein LAMTOR1	43781.4
AK17A_HUMAN	Q02040	Q02040	AKAP17A	A-kinase anchor protein 17A	43766.2
FUBP3_HUMAN	Q96I24	Q96I24	FUBP3	Far upstream element-binding protein 3	43760.2
SUMO1_HUMAN	G2XKQ0;P63165	P63165	SUMO1	Small ubiquitin-related modifier 1	43757
CARF_HUMAN	Q9NXV6	Q9NXV6	CDKN2AIP	CDKN2A-interacting protein	43733.1
NUBP1_HUMAN	P53384	P53384	NUBP1	Cytosolic Fe-S cluster assembly factor NUBP1	43660.6
PEPD_HUMAN	P12955	P12955	PEPD	Xaa-Pro dipeptidase	43643.8
SYLC_HUMAN	Q9P2J5	Q9P2J5	LARS1	Leucine--tRNA ligase, cytoplasmic	43613.4
COASY_HUMAN	Q13057	Q13057	COASY	Bifunctional coenzyme A synthase	43596
FOXK1_HUMAN	P85037	P85037	FOXK1	Forkhead box protein K1	43573.7
PSMD8_HUMAN	P48556	P48556	PSMD8	26S proteasome non-ATPase regulatory subunit 8	43548.8
CD34_HUMAN	P28906	P28906	CD34	Hematopoietic progenitor cell antigen CD34	43543
CROCC_HUMAN	Q5TZA2	Q5TZA2	CROCC	Rootletin	43434.1
EIF3D_HUMAN	O15371	O15371	EIF3D	Eukaryotic translation initiation factor 3 subunit D	43414
AP2A2_HUMAN	O94973	O94973	AP2A2	AP-2 complex subunit alpha-2	43386.2
TOLIP_HUMAN	Q9H0E2	Q9H0E2	TOLLIP	Toll-interacting protein	43179.2
DPP2_HUMAN	Q9UHL4	Q9UHL4	DPP7	Dipeptidyl peptidase 2	42980.6
LC7L2_HUMAN	Q9Y383	Q9Y383	LUC7L2	Putative RNA-binding protein Luc7-like 2	42980.3
RNAS2_HUMAN	P10153	P10153	RNASE2	Non-secretory ribonuclease	42976.2
AIDA_HUMAN	Q96BJ3	Q96BJ3	AIDA	Axin interactor, dorsalization-associated protein	42958.2
EFGM_HUMAN	Q96RP9	Q96RP9	GFM1	Elongation factor G, mitochondrial	42949
MTA2_HUMAN	O94776	O94776	MTA2	Metastasis-associated protein MTA2	42936.1
PACS1_HUMAN	Q6VY07	Q6VY07	PACS1	Phosphofurin acidic cluster sorting protein 1	42926.2
MCAT_HUMAN	O43772	O43772	SLC25A20	Mitochondrial carnitine/acylcarnitine carrier protein	42918.7
CERS4_HUMAN	Q9HA82	Q9HA82	CERS4	Ceramide synthase 4	42891.9
DBLOH_HUMAN	Q9NR28	Q9NR28	DIABLO	Diablo IAP-binding mitochondrial protein	42880
NDUBA_HUMAN	O96000	O96000	NDUFB10	NADH dehydrogenase [ubiquinone] 1 beta subcomplex subunit 10	42879
BT3L4_HUMAN	Q96K17	Q96K17	BTF3L4	Transcription factor BTF3 homolog 4	42834.1
NUDC_HUMAN	Q9Y266	Q9Y266	NUDC	Nuclear migration protein nudC	42779.8
ABCF1_HUMAN	Q8NE71	Q8NE71	ABCF1	ATP-binding cassette sub-family F member 1	42714.1
SBDS_HUMAN	Q9Y3A5	Q9Y3A5	SBDS	Ribosome maturation protein SBDS	42670.9
IF2B_HUMAN	P20042	P20042	EIF2S2	Eukaryotic translation initiation factor 2 subunit 2	42651.7
ARGL1_HUMAN	Q9NWB6	Q9NWB6	ARGLU1	Arginine and glutamate-rich protein 1	42636.2
RAB18_HUMAN	Q9NP72	Q9NP72	RAB18	Ras-related protein Rab-18	42603.7
MRGRF_HUMAN	Q96AM1	Q96AM1	MRGPRF	Mas-related G-protein coupled receptor member F	42599.1
SUN2_HUMAN	Q9UH99	Q9UH99	SUN2	SUN domain-containing protein 2	42587.9
STML2_HUMAN	Q9UJZ1	Q9UJZ1	STOML2	Stomatin-like protein 2, mitochondrial	42565.8
ITA7_HUMAN	Q13683	Q13683	ITGA7	Integrin alpha-7	42517.5
CSN4_HUMAN	Q9BT78	Q9BT78	COPS4	COP9 signalosome complex subunit 4	42506.6
FAS_HUMAN	P49327	P49327	FASN	Fatty acid synthase	42500.7
GSTT1_HUMAN	P30711	P30711	GSTT1	Glutathione S-transferase theta-1	42482.2
PBX1_HUMAN	P40424;P40425;P40426	P40424	PBX1	Pre-B-cell leukemia transcription factor 1	42470
GSLG1_HUMAN	Q92896	Q92896	GLG1	Golgi apparatus protein 1	42400.2
TSTD1_HUMAN	Q8NFU3	Q8NFU3	TSTD1	Thiosulfate:glutathione sulfurtransferase	42380.3
NRM_HUMAN	Q8IXM6	Q8IXM6	NRM	Nurim	42354.6
CFA99_HUMAN	D6REC4	D6REC4	CFAP99	Cilia- and flagella-associated protein 99	42347.9
AUHM_HUMAN	Q13825	Q13825	AUH	Methylglutaconyl-CoA hydratase, mitochondrial	42311.8
HTRA2_HUMAN	O43464;P83110	O43464	HTRA2	Serine protease HTRA2, mitochondrial	42300.8
SCRN1_HUMAN	Q12765	Q12765	SCRN1	Secernin-1	42261.7
TSN_HUMAN	Q15631	Q15631	TSN	Translin	42251.7
SSH3_HUMAN	Q8TE77	Q8TE77	SSH3	Protein phosphatase Slingshot homolog 3	42201.9
XPC_HUMAN	Q01831	Q01831	XPC	DNA repair protein complementing XP-C cells	42161.1
MEGF9_HUMAN	Q9H1U4	Q9H1U4	MEGF9	Multiple epidermal growth factor-like domains protein 9	42136.9
CHD4_HUMAN	Q14839	Q14839	CHD4	Chromodomain-helicase-DNA-binding protein 4	42135.9
FHL1_HUMAN	Q13642	Q13642	FHL1	Four and a half LIM domains protein 1	42107.7
DEOC_HUMAN	Q9Y315	Q9Y315	DERA	Deoxyribose-phosphate aldolase	42060.5
F120A_HUMAN	Q9NZB2	Q9NZB2	FAM120A	Constitutive coactivator of PPAR-gamma-like protein 1	42017.1
CHM4B_HUMAN	Q9H444;Q96CF2	Q9H444	CHMP4B	Charged multivesicular body protein 4b	41985.9
SPD2B_HUMAN	A1X283	A1X283	SH3PXD2B	SH3 and PX domain-containing protein 2B	41929.5
HV102_HUMAN	P23083;A0A0C4DH31	P23083	IGHV1-2	Immunoglobulin heavy variable 1-2	41910.9
PFD6_HUMAN	O15212	O15212	PFDN6	Prefoldin subunit 6	41887.2
PP1G_HUMAN	P36873	P36873	PPP1CC	Serine/threonine-protein phosphatase PP1-gamma catalytic subunit	41880.9
GRAN_HUMAN	P28676	P28676	GCA	Grancalcin	41857.4
KV139_HUMAN;KVD39_HUMAN	P04432;P01597;A0A0C4DH73;A0A0C4DH72;P01611	P01597;P04432	IGKV1-39;IGKV1D-39	Immunoglobulin kappa variable 1-39	41761.2
PAK4_HUMAN	O96013	O96013	PAK4	Serine/threonine-protein kinase PAK 4	41742.8
TMED4_HUMAN	Q7Z7H5	Q7Z7H5	TMED4	Transmembrane emp24 domain-containing protein 4	41705.3
EMAL2_HUMAN	O95834	O95834	EML2	Echinoderm microtubule-associated protein-like 2	41679.5
MYEF2_HUMAN	Q9P2K5	Q9P2K5	MYEF2	Myelin expression factor 2	41662.9
AN32E_HUMAN	Q9BTT0	Q9BTT0	ANP32E	Acidic leucine-rich nuclear phosphoprotein 32 family member E	41613.6
SPS1_HUMAN	P49903	P49903	SEPHS1	Selenide, water dikinase 1	41541.8
CX7A2_HUMAN	P14406	P14406	COX7A2	Cytochrome c oxidase subunit 7A2, mitochondrial	41513.6
HCFC1_HUMAN	P51610	P51610	HCFC1	Host cell factor 1	41471.2
YES_HUMAN	P07947	P07947	YES1	Tyrosine-protein kinase Yes	41450.9
IFT1B_HUMAN	Q5T764	Q5T764	IFIT1B	Interferon-induced protein with tetratricopeptide repeats 1B	41440.3
CHIP_HUMAN	Q9UNE7	Q9UNE7	STUB1	E3 ubiquitin-protein ligase CHIP	41428.9
PAIP1_HUMAN	Q9H074	Q9H074	PAIP1	Polyadenylate-binding protein-interacting protein 1	41264.9
SNX9_HUMAN	Q9Y5X1	Q9Y5X1	SNX9	Sorting nexin-9	41205.2
PLXB2_HUMAN	O15031	O15031	PLXNB2	Plexin-B2	41129.4
SAE1_HUMAN	Q9UBE0	Q9UBE0	SAE1	SUMO-activating enzyme subunit 1	41009.5
FA98A_HUMAN	Q8NCA5	Q8NCA5	FAM98A	Protein FAM98A	41000
PTPRA_HUMAN	P18433	P18433	PTPRA	Receptor-type tyrosine-protein phosphatase alpha	40988.4
IF5_HUMAN	P55010	P55010	EIF5	Eukaryotic translation initiation factor 5	40918.9
DAG1_HUMAN	Q14118	Q14118	DAG1	Dystroglycan 1	40908.3
SCO1_HUMAN	O75880	O75880	SCO1	Protein SCO1 homolog, mitochondrial	40875.7
PEPL_HUMAN	O60437	O60437	PPL	Periplakin	40829.7
HDHD3_HUMAN	Q9BSH5	Q9BSH5	HDHD3	Haloacid dehalogenase-like hydrolase domain-containing protein 3	40808.3
HG2A_HUMAN	P04233	P04233	CD74	HLA class II histocompatibility antigen gamma chain	40781.7
TARSH_HUMAN	Q7Z7G0	Q7Z7G0	ABI3BP	Target of Nesh-SH3	40763.8
SMAD2_HUMAN	Q15796	Q15796	SMAD2	Mothers against decapentaplegic homolog 2	40759.2
GNPI1_HUMAN	P46926;Q8TDQ7	P46926	GNPDA1	Glucosamine-6-phosphate isomerase 1	40751.3
LXN_HUMAN	Q9BS40	Q9BS40	LXN	Latexin	40704.3
PSMD3_HUMAN	O43242	O43242	PSMD3	26S proteasome non-ATPase regulatory subunit 3	40682.8
STIM1_HUMAN	Q13586	Q13586	STIM1	Stromal interaction molecule 1	40675.7
SHFL_HUMAN	Q9NUL5	Q9NUL5	SHFL	Shiftless antiviral inhibitor of ribosomal frameshifting protein	40671.3
NCPR_HUMAN	P16435	P16435	POR	NADPH--cytochrome P450 reductase	40653.4
TOP2B_HUMAN	Q02880	Q02880	TOP2B	DNA topoisomerase 2-beta	40565.8
YKT6_HUMAN	O15498	O15498	YKT6	Synaptobrevin homolog YKT6	40539.8
MYO1B_HUMAN	O43795	O43795	MYO1B	Unconventional myosin-Ib	40495.2
FGF2_HUMAN	P09038	P09038	FGF2	Fibroblast growth factor 2	40441.3
SMCA4_HUMAN	P51531;P51532	P51532	SMARCA4	Transcription activator BRG1	40417.7
SAP18_HUMAN	O00422	O00422	SAP18	Histone deacetylase complex subunit SAP18	40272.8
MARCS_HUMAN	P29966	P29966	MARCKS	Myristoylated alanine-rich C-kinase substrate	40262.8
SNUT2_HUMAN	Q53GS9	Q53GS9	USP39	U4/U6.U5 tri-snRNP-associated protein 2	40222.8
DSG1_HUMAN	Q02413	Q02413	DSG1	Desmoglein-1	40221.8
GDE_HUMAN	P35573	P35573	AGL	Glycogen debranching enzyme	40195.1
THTR_HUMAN	Q16762	Q16762	TST	Thiosulfate sulfurtransferase	40192.8
TX1B3_HUMAN	O14907	O14907	TAX1BP3	Tax1-binding protein 3	40184.9
MUC18_HUMAN	P43121	P43121	MCAM	Cell surface glycoprotein MUC18	40151.7
MA7D1_HUMAN	Q3KQU3	Q3KQU3	MAP7D1	MAP7 domain-containing protein 1	40136.2
A2AP_HUMAN	P08697	P08697	SERPINF2	Alpha-2-antiplasmin	40124.3
CD59_HUMAN	P13987	P13987	CD59	CD59 glycoprotein	40090.3
LTC4S_HUMAN	Q16873	Q16873	LTC4S	Leukotriene C4 synthase	40089.6
LIMS1_HUMAN	P48059	P48059	LIMS1	LIM and senescent cell antigen-like-containing domain protein 1	40063.8
DHPR_HUMAN	P09417	P09417	QDPR	Dihydropteridine reductase	40051.5
IF4G2_HUMAN	P78344	P78344	EIF4G2	Eukaryotic translation initiation factor 4 gamma 2	40017.4
IVD_HUMAN	P26440	P26440	IVD	Isovaleryl-CoA dehydrogenase, mitochondrial	39972.2
ERH_HUMAN	P84090	P84090	ERH	Enhancer of rudimentary homolog	39949.6
PAXX_HUMAN	Q9BUH6	Q9BUH6	PAXX	Protein PAXX	39803.8
HEXA_HUMAN	P06865	P06865	HEXA	Beta-hexosaminidase subunit alpha	39802.1
DYL1_HUMAN	P63167;Q96FJ2	P63167	DYNLL1	Dynein light chain 1, cytoplasmic	39757.5
SYFA_HUMAN	Q9Y285	Q9Y285	FARSA	Phenylalanine--tRNA ligase alpha subunit	39662.9
GLUCM_HUMAN	Q7Z3D6	Q7Z3D6	DGLUCY	D-glutamate cyclase, mitochondrial	39660.8
RRAGA_HUMAN	Q5VZM2;Q7L523	Q7L523	RRAGA	Ras-related GTP-binding protein A	39653.8
CAV1_HUMAN	Q03135	Q03135	CAV1	Caveolin-1	39643.4
MNDA_HUMAN	P41218	P41218	MNDA	Myeloid cell nuclear differentiation antigen	39591.5
ITB2_HUMAN	P05107	P05107	ITGB2	Integrin beta-2	39587.2
CO8A_HUMAN	P07357	P07357	C8A	Complement component C8 alpha chain	39517.4
CTBP2_HUMAN	P56545	P56545	CTBP2	C-terminal-binding protein 2	39490.4
SPTC1_HUMAN	O15269	O15269	SPTLC1	Serine palmitoyltransferase 1	39371
SNX1_HUMAN	Q13596	Q13596	SNX1	Sorting nexin-1	39365.9
ECHM_HUMAN	P30084	P30084	ECHS1	Enoyl-CoA hydratase, mitochondrial	39321.3
SEC13_HUMAN	P55735	P55735	SEC13	Protein SEC13 homolog	39313.7
NFKB1_HUMAN	P19838	P19838	NFKB1	Nuclear factor NF-kappa-B p105 subunit	39292.8
ACOT9_HUMAN	Q9Y305	Q9Y305	ACOT9	Acyl-coenzyme A thioesterase 9, mitochondrial	39278.5
PIPNB_HUMAN	P48739	P48739	PITPNB	Phosphatidylinositol transfer protein beta isoform	39230.7
CBX3_HUMAN	Q13185	Q13185	CBX3	Chromobox protein homolog 3	39166.6
PLPHP_HUMAN	O94903	O94903	PLPBP	Pyridoxal phosphate homeostasis protein	39146.2
IF16_HUMAN	Q16666	Q16666	IFI16	Gamma-interferon-inducible protein 16	39135.8
NEK9_HUMAN	Q8TD19	Q8TD19	NEK9	Serine/threonine-protein kinase Nek9	39133.1
KV105_HUMAN	P01602	P01602	IGKV1-5	Immunoglobulin kappa variable 1-5	39126.6
TECR_HUMAN	Q9NZ01	Q9NZ01	TECR	Very-long-chain enoyl-CoA reductase	39111.1
TACC1_HUMAN	O75410;O95359	O75410	TACC1	Transforming acidic coiled-coil-containing protein 1	39065.9
APOA_HUMAN	P08519	P08519	LPA	Apolipoprotein(a)	39037.1
PDCD5_HUMAN	O14737	O14737	PDCD5	Programmed cell death protein 5	39035.5
MOONR_HUMAN	Q2KHM9	Q2KHM9	KIAA0753	Protein moonraker	39034.8
HPBP1_HUMAN	Q9NZL4	Q9NZL4	HSPBP1	Hsp70-binding protein 1	38945.4
TFR1_HUMAN	P02786	P02786	TFRC	Transferrin receptor protein 1	38905.6
NNRE_HUMAN	Q8NCW5	Q8NCW5	NAXE	NAD(P)H-hydrate epimerase	38864.9
ACAD9_HUMAN	Q9H845	Q9H845	ACAD9	Complex I assembly factor ACAD9, mitochondrial	38837.9
SAFB2_HUMAN	Q14151	Q14151	SAFB2	Scaffold attachment factor B2	38825.6
NTPCR_HUMAN	Q9BSD7	Q9BSD7	NTPCR	Cancer-related nucleoside-triphosphatase	38757.8
5NTC_HUMAN	P49902	P49902	NT5C2	Cytosolic purine 5'-nucleotidase	38749.8
NDUA4_HUMAN	O00483	O00483	NDUFA4	Cytochrome c oxidase subunit NDUFA4	38718.2
MA2A1_HUMAN	Q16706	Q16706	MAN2A1	Alpha-mannosidase 2	38704.7
TXD12_HUMAN	O95881	O95881	TXNDC12	Thioredoxin domain-containing protein 12	38685.2
CRYL1_HUMAN	Q9Y2S2	Q9Y2S2	CRYL1	Lambda-crystallin homolog	38683.2
PLTP_HUMAN	P55058	P55058	PLTP	Phospholipid transfer protein	38599.2
EIF3H_HUMAN	O15372	O15372	EIF3H	Eukaryotic translation initiation factor 3 subunit H	38586.7
ERAP2_HUMAN	Q6P179	Q6P179	ERAP2	Endoplasmic reticulum aminopeptidase 2	38585.3
PDLI5_HUMAN	Q96HC4	Q96HC4	PDLIM5	PDZ and LIM domain protein 5	38579.2
LYN_HUMAN	P07948	P07948	LYN	Tyrosine-protein kinase Lyn	38570.9
PP1A_HUMAN	P62136	P62136	PPP1CA	Serine/threonine-protein phosphatase PP1-alpha catalytic subunit	38566.9
NDRG1_HUMAN	Q92597	Q92597	NDRG1	Protein NDRG1	38498.6
DSC1_HUMAN	Q08554	Q08554	DSC1	Desmocollin-1	38477.9
TOM70_HUMAN	O94826	O94826	TOMM70	Mitochondrial import receptor subunit TOM70	38474.2
ADK_HUMAN	P55263	P55263	ADK	Adenosine kinase	38442
AGFG1_HUMAN	P52594	P52594	AGFG1	Arf-GAP domain and FG repeat-containing protein 1	38375.7
BOLA2_HUMAN	Q9H3K6	Q9H3K6	BOLA2B	BolA-like protein 2	38371.4
GLGB_HUMAN	Q04446	Q04446	GBE1	1,4-alpha-glucan-branching enzyme	38354.1
HPRT_HUMAN	P00492	P00492	HPRT1	Hypoxanthine-guanine phosphoribosyltransferase	38277.3
RD23A_HUMAN	P54725	P54725	RAD23A	UV excision repair protein RAD23 homolog A	38267.1
NAA15_HUMAN	Q9BXJ9	Q9BXJ9	NAA15	N-alpha-acetyltransferase 15, NatA auxiliary subunit	38210.2
AAPK1_HUMAN	Q13131	Q13131	PRKAA1	5'-AMP-activated protein kinase catalytic subunit alpha-1	38191.8
ZCCHV_HUMAN	Q7Z2W4	Q7Z2W4	ZC3HAV1	Zinc finger CCCH-type antiviral protein 1	38173.8
TXD17_HUMAN	Q9BRA2	Q9BRA2	TXNDC17	Thioredoxin domain-containing protein 17	38172.7
RHOG_HUMAN	P84095	P84095	RHOG	Rho-related GTP-binding protein RhoG	38163
PROS_HUMAN	P07225	P07225	PROS1	Vitamin K-dependent protein S	38140.2
TARA_HUMAN	Q9H2D6	Q9H2D6	TRIOBP	TRIO and F-actin-binding protein	38104.2
CDIPT_HUMAN	O14735	O14735	CDIPT	CDP-diacylglycerol--inositol 3-phosphatidyltransferase	38094.5
LSM2_HUMAN	Q9Y333	Q9Y333	LSM2	U6 snRNA-associated Sm-like protein LSm2	38065.2
ENDD1_HUMAN	O94919	O94919	ENDOD1	Endonuclease domain-containing 1 protein	38065
EGFR_HUMAN	P00533	P00533	EGFR	Epidermal growth factor receptor	38032.5
CD248_HUMAN	Q9HCU0	Q9HCU0	CD248	Endosialin	38003.6
E41L3_HUMAN	Q9Y2J2	Q9Y2J2	EPB41L3	Band 4.1-like protein 3	37998
GPX3_HUMAN	P22352	P22352	GPX3	Glutathione peroxidase 3	37946.6
STA10_HUMAN	Q9Y365	Q9Y365	STARD10	START domain-containing protein 10	37884.4
CCAR1_HUMAN	Q8IX12	Q8IX12	CCAR1	Cell division cycle and apoptosis regulator protein 1	37876.2
DPB1_HUMAN	P04440	P04440	HLA-DPB1	HLA class II histocompatibility antigen, DP beta 1 chain	37838.4
EPCR_HUMAN	Q9UNN8	Q9UNN8	PROCR	Endothelial protein C receptor	37827.4
RFC4_HUMAN	P35249	P35249	RFC4	Replication factor C subunit 4	37790.3
DHRS1_HUMAN	Q96LJ7	Q96LJ7	DHRS1	Dehydrogenase/reductase SDR family member 1	37759.7
FMO3_HUMAN	P31513	P31513	FMO3	Flavin-containing monooxygenase 3	37747.6
S10A7_HUMAN	P31151	P31151	S100A7	Protein S100-A7	37730.1
BAP31_HUMAN	P51572	P51572	BCAP31	B-cell receptor-associated protein 31	37717.2
SAA4_HUMAN	P35542	P35542	SAA4	Serum amyloid A-4 protein	37701.3
ADRO_HUMAN	P22570	P22570	FDXR	NADPH:adrenodoxin oxidoreductase, mitochondrial	37652.9
PRRX1_HUMAN	Q8N693;O15266;P54821;Q99811;Q99453;O95076;Q9Y2V3;O60902;Q96IS3;Q5XKR4;O14813;Q96QS3;A6NNA5;Q9H161;A6NJT0;Q15699	P54821	PRRX1	Paired mesoderm homeobox protein 1	37640
WIPF1_HUMAN	O43516	O43516	WIPF1	WAS/WASL-interacting protein family member 1	37627.2
CRKL_HUMAN	P46109	P46109	CRKL	Crk-like protein	37604
TTL12_HUMAN	Q14166	Q14166	TTLL12	Tubulin--tyrosine ligase-like protein 12	37588.2
PFKAP_HUMAN	Q01813	Q01813	PFKP	ATP-dependent 6-phosphofructokinase, platelet type	37561.2
CIP4_HUMAN	Q15642	Q15642	TRIP10	Cdc42-interacting protein 4	37555.3
SNRPA_HUMAN	P09012	P09012	SNRPA	U1 small nuclear ribonucleoprotein A	37451.3
NFIC_HUMAN	Q14938;Q12857;O00712;P08651	P08651	NFIC	Nuclear factor 1 C-type	37414.3
DC1I2_HUMAN	Q13409	Q13409	DYNC1I2	Cytoplasmic dynein 1 intermediate chain 2	37388
NEUA_HUMAN	Q8NFW8	Q8NFW8	CMAS	N-acylneuraminate cytidylyltransferase	37378.2
SC16A_HUMAN	O15027	O15027	SEC16A	Protein transport protein Sec16A	37378
UN45A_HUMAN	Q9H3U1	Q9H3U1	UNC45A	Protein unc-45 homolog A	37344.9
PRS10_HUMAN	P62333	P62333	PSMC6	26S proteasome regulatory subunit 10B	37318.4
DDX42_HUMAN	Q86XP3	Q86XP3	DDX42	ATP-dependent RNA helicase DDX42	37299.2
CAH3_HUMAN	P07451	P07451	CA3	Carbonic anhydrase 3	37296.8
PEA15_HUMAN	Q15121	Q15121	PEA15	Astrocytic phosphoprotein PEA-15	37292.3
PYM1_HUMAN	Q9BRP8	Q9BRP8	PYM1	Partner of Y14 and mago	37274.6
KANK3_HUMAN	Q6NY19	Q6NY19	KANK3	KN motif and ankyrin repeat domain-containing protein 3	37266.6
KAT3_HUMAN	Q6YP21	Q6YP21	KYAT3	Kynurenine--oxoglutarate transaminase 3	37263.9
NHLC2_HUMAN	Q8NBF2	Q8NBF2	NHLRC2	NHL repeat-containing protein 2	37232.5
SPRE_HUMAN	P35270	P35270	SPR	Sepiapterin reductase	37219.3
CPSF7_HUMAN	Q8N684	Q8N684	CPSF7	Cleavage and polyadenylation specificity factor subunit 7	37216.3
PCP_HUMAN	P42785	P42785	PRCP	Lysosomal Pro-X carboxypeptidase	37212.4
MAGD2_HUMAN	Q9UNF1	Q9UNF1	MAGED2	Melanoma-associated antigen D2	37194.3
DAZP1_HUMAN	Q96EP5	Q96EP5	DAZAP1	DAZ-associated protein 1	37174.5
DHX30_HUMAN	Q7L2E3	Q7L2E3	DHX30	ATP-dependent RNA helicase DHX30	37124.4
TSNAX_HUMAN	Q99598	Q99598	TSNAX	Translin-associated protein X	37123.2
MYO1F_HUMAN	O00160	O00160	MYO1F	Unconventional myosin-If	37086.2
2A5D_HUMAN	Q14738	Q14738	PPP2R5D	Serine/threonine-protein phosphatase 2A 56 kDa regulatory subunit delta isoform	37015.4
COPE_HUMAN	O14579	O14579	COPE	Coatomer subunit epsilon	36990.4
NMT1_HUMAN	P30419	P30419	NMT1	Glycylpeptide N-tetradecanoyltransferase 1	36937.5
PLM_HUMAN	O00168	O00168	FXYD1	Phospholemman	36912.9
GAR1_HUMAN	Q9NY12	Q9NY12	GAR1	H/ACA ribonucleoprotein complex subunit 1	36860.2
SLFN5_HUMAN	Q08AF3	Q08AF3	SLFN5	Schlafen family member 5	36859.2
CO2_HUMAN	P06681	P06681	C2	Complement C2	36856
HV169_HUMAN	P01742	P01742	IGHV1-69	Immunoglobulin heavy variable 1-69	36852.5
PURA2_HUMAN	P30520	P30520	ADSS2	Adenylosuccinate synthetase isozyme 2	36846.8
SELH_HUMAN	Q8IZQ5	Q8IZQ5	SELENOH	Selenoprotein H	36829.8
CLIC2_HUMAN	O15247	O15247	CLIC2	Chloride intracellular channel protein 2	36812.5
ASC_HUMAN	Q9ULZ3	Q9ULZ3	PYCARD	Apoptosis-associated speck-like protein containing a CARD	36779.9
APOC2_HUMAN	P02655	P02655	APOC2	Apolipoprotein C-II	36754.4
CRK_HUMAN	P46108	P46108	CRK	Adapter molecule crk	36734.2
TP53B_HUMAN	Q12888	Q12888	TP53BP1	TP53-binding protein 1	36692.4
RBM43_HUMAN	Q6ZSC3	Q6ZSC3	RBM43	RNA-binding protein 43	36643.7
RIC8A_HUMAN	Q9NPQ8;Q9NVN3	Q9NPQ8	RIC8A	Synembryn-A	36638.2
CUL4A_HUMAN	Q13619	Q13619	CUL4A	Cullin-4A	36634.3
NAKD2_HUMAN	Q4G0N4	Q4G0N4	NADK2	NAD kinase 2, mitochondrial	36613.8
STXB1_HUMAN	P61764	P61764	STXBP1	Syntaxin-binding protein 1	36595
CSN7A_HUMAN	Q9UBW8	Q9UBW8	COPS7A	COP9 signalosome complex subunit 7a	36582.9
CD151_HUMAN	P48509	P48509	CD151	CD151 antigen	36573.3
TCAL3_HUMAN	Q969E4	Q969E4	TCEAL3	Transcription elongation factor A protein-like 3	36570.1
EIF1_HUMAN	O60739;P41567	P41567	EIF1	Eukaryotic translation initiation factor 1	36550.6
HMGB2_HUMAN	P26583	P26583	HMGB2	High mobility group protein B2	36544.4
RL38_HUMAN	P63173	P63173	RPL38	Large ribosomal subunit protein eL38	36521.7
VP26B_HUMAN	Q4G0F5	Q4G0F5	VPS26B	Vacuolar protein sorting-associated protein 26B	36473.3
HSDL2_HUMAN	Q6YN16	Q6YN16	HSDL2	Hydroxysteroid dehydrogenase-like protein 2	36458.9
LONM_HUMAN	P36776	P36776	LONP1	Lon protease homolog, mitochondrial	36429.8
FARP1_HUMAN	Q9Y4F1	Q9Y4F1	FARP1	FERM, ARHGEF and pleckstrin domain-containing protein 1	36395
UFC1_HUMAN	Q9Y3C8	Q9Y3C8	UFC1	Ubiquitin-fold modifier-conjugating enzyme 1	36367.2
CASP1_HUMAN	P29466	P29466	CASP1	Caspase-1	36341.3
DNJC8_HUMAN	O75937	O75937	DNAJC8	DnaJ homolog subfamily C member 8	36313.4
TINAL_HUMAN	Q9GZM7	Q9GZM7	TINAGL1	Tubulointerstitial nephritis antigen-like	36279.3
PYGM_HUMAN	P11217	P11217	PYGM	Glycogen phosphorylase, muscle form	36256.6
PA1B2_HUMAN	P68402	P68402	PAFAH1B2	Platelet-activating factor acetylhydrolase IB subunit alpha2	36240.9
HKDC1_HUMAN	Q2TB90	Q2TB90	HKDC1	Hexokinase HKDC1	36238.1
ICLN_HUMAN	P54105	P54105	CLNS1A	Methylosome subunit pICln	36234.6
CDV3_HUMAN	Q9UKY7	Q9UKY7	CDV3	Protein CDV3 homolog	36216.4
CAPAM_HUMAN	Q9H4Z3	Q9H4Z3	PCIF1	mRNA (2'-O-methyladenosine-N(6)-)-methyltransferase	36178.6
SWP70_HUMAN	Q9UH65	Q9UH65	SWAP70	Switch-associated protein 70	36173.1
LARP1_HUMAN	Q6PKG0	Q6PKG0	LARP1	La-related protein 1	36168.1
EMAL4_HUMAN	Q9HC35	Q9HC35	EML4	Echinoderm microtubule-associated protein-like 4	36146.9
3HIDH_HUMAN	P31937	P31937	HIBADH	3-hydroxyisobutyrate dehydrogenase, mitochondrial	36130.8
AFAD_HUMAN	P55196	P55196	AFDN	Afadin	36094.2
ODBA_HUMAN	P12694	P12694	BCKDHA	2-oxoisovalerate dehydrogenase subunit alpha, mitochondrial	36069.4
TFP11_HUMAN	Q9UBB9	Q9UBB9	TFIP11	Tuftelin-interacting protein 11	36039.9
MFAP4_HUMAN	P55083	P55083	MFAP4	Microfibril-associated glycoprotein 4	35993.2
SRBS1_HUMAN	Q9BX66	Q9BX66	SORBS1	Sorbin and SH3 domain-containing protein 1	35982.2
ITAV_HUMAN	P06756	P06756	ITGAV	Integrin alpha-V	35973.4
KREM2_HUMAN	Q8NCW0	Q8NCW0	KREMEN2	Kremen protein 2	35970.3
RBM12_HUMAN	Q9NTZ6	Q9NTZ6	RBM12	RNA-binding protein 12	35955.9
HEBP2_HUMAN	Q9Y5Z4	Q9Y5Z4	HEBP2	Heme-binding protein 2	35903.8
SR140_HUMAN	O15042	O15042	U2SURP	U2 snRNP-associated SURP motif-containing protein	35895.9
MYH14_HUMAN	Q7Z406	Q7Z406	MYH14	Myosin-14	35872.4
EIF3K_HUMAN	Q9UBQ5	Q9UBQ5	EIF3K	Eukaryotic translation initiation factor 3 subunit K	35868.8
CCD33_HUMAN	Q8N5R6	Q8N5R6	CCDC33	Coiled-coil domain-containing protein 33	35821.3
UBXN6_HUMAN	Q9BZV1	Q9BZV1	UBXN6	UBX domain-containing protein 6	35802
SP16H_HUMAN	Q9Y5B9	Q9Y5B9	SUPT16H	FACT complex subunit SPT16	35777.1
AP1S2_HUMAN	P56377	P56377	AP1S2	AP-1 complex subunit sigma-2	35741
CD63_HUMAN	P08962	P08962	CD63	CD63 antigen	35714.4
CBPQ_HUMAN	Q9Y646	Q9Y646	CPQ	Carboxypeptidase Q	35703.8
ATX2L_HUMAN	Q8WWM7	Q8WWM7	ATXN2L	Ataxin-2-like protein	35686.4
HS71L_HUMAN	P34931	P34931	HSPA1L	Heat shock 70 kDa protein 1-like	35635.4
NOP2_HUMAN	P46087	P46087	NOP2	Probable 28S rRNA (cytosine(4447)-C(5))-methyltransferase	35602.7
TUT4_HUMAN	Q5TAX3	Q5TAX3	TUT4	Terminal uridylyltransferase 4	35590
BGLR_HUMAN	P08236	P08236	GUSB	Beta-glucuronidase	35583.9
ABHGA_HUMAN	O95870	O95870	ABHD16A	Phosphatidylserine lipase ABHD16A	35565.5
RERE_HUMAN	Q9P2R6	Q9P2R6	RERE	Arginine-glutamic acid dipeptide repeats protein	35540.5
NB5R2_HUMAN	Q6BCY4	Q6BCY4	CYB5R2	NADH-cytochrome b5 reductase 2	35521.6
TRI23_HUMAN	P36406	P36406	TRIM23	E3 ubiquitin-protein ligase TRIM23	35503.6
ROCK2_HUMAN	O75116	O75116	ROCK2	Rho-associated protein kinase 2	35483.9
PTN23_HUMAN	Q9H3S7	Q9H3S7	PTPN23	Tyrosine-protein phosphatase non-receptor type 23	35477.1
CK5P3_HUMAN	Q96JB5	Q96JB5	CDK5RAP3	CDK5 regulatory subunit-associated protein 3	35461.4
SRS11_HUMAN	Q05519	Q05519	SRSF11	Serine/arginine-rich splicing factor 11	35438.2
CC124_HUMAN	Q96CT7	Q96CT7	CCDC124	Coiled-coil domain-containing protein 124	35390.4
ARF6_HUMAN	P62330	P62330	ARF6	ADP-ribosylation factor 6	35386.8
EF1B_HUMAN	P24534	P24534	EEF1B2	Elongation factor 1-beta	35384.4
AL4A1_HUMAN	P30038	P30038	ALDH4A1	Delta-1-pyrroline-5-carboxylate dehydrogenase, mitochondrial	35288.1
CHM1B_HUMAN	Q7LBR1	Q7LBR1	CHMP1B	Charged multivesicular body protein 1b	35276.4
TS101_HUMAN	Q99816	Q99816	TSG101	Tumor susceptibility gene 101 protein	35223.6
PSD12_HUMAN	O00232	O00232	PSMD12	26S proteasome non-ATPase regulatory subunit 12	35188
SYYC_HUMAN	P54577	P54577	YARS1	Tyrosine--tRNA ligase, cytoplasmic	35177
RALA_HUMAN	P11233	P11233	RALA	Ras-related protein Ral-A	35170.2
SCRIB_HUMAN	Q14160	Q14160	SCRIB	Protein scribble homolog	35152.5
PACN2_HUMAN	Q9UNF0	Q9UNF0	PACSIN2	Protein kinase C and casein kinase substrate in neurons protein 2	35101.5
DDAH1_HUMAN	O94760	O94760	DDAH1	N(G),N(G)-dimethylarginine dimethylaminohydrolase 1	35096.2
EXOS4_HUMAN	Q9NPD3	Q9NPD3	EXOSC4	Exosome complex component RRP41	35075.7
ECHD1_HUMAN	Q9NTX5	Q9NTX5	ECHDC1	Ethylmalonyl-CoA decarboxylase	35074.7
PIN1_HUMAN	Q13526	Q13526	PIN1	Peptidyl-prolyl cis-trans isomerase NIMA-interacting 1	35074.1
PRP6_HUMAN	O94906	O94906	PRPF6	Pre-mRNA-processing factor 6	35069.7
CD81_HUMAN	P60033	P60033	CD81	CD81 antigen	35062.8
IPO7_HUMAN	O95373	O95373	IPO7	Importin-7	35056.2
EIF3G_HUMAN	O75821	O75821	EIF3G	Eukaryotic translation initiation factor 3 subunit G	34937.8
LSM7_HUMAN	Q9UK45	Q9UK45	LSM7	U6 snRNA-associated Sm-like protein LSm7	34932.1
PDLI2_HUMAN	Q96JY6	Q96JY6	PDLIM2	PDZ and LIM domain protein 2	34922.8
PICAL_HUMAN	Q13492	Q13492	PICALM	Phosphatidylinositol-binding clathrin assembly protein	34910.1
PTN11_HUMAN	Q06124	Q06124	PTPN11	Tyrosine-protein phosphatase non-receptor type 11	34900.8
HV5X1_HUMAN	A0A0J9YXX1	A0A0J9YXX1	IGHV5-10-1	Immunoglobulin heavy variable 5-10-1	34882.2
HNRL1_HUMAN	Q9BUJ2	Q9BUJ2	HNRNPUL1	Heterogeneous nuclear ribonucleoprotein U-like protein 1	34850.8
ARL3_HUMAN	P36405	P36405	ARL3	ADP-ribosylation factor-like protein 3	34815.1
SPRC_HUMAN	P09486	P09486	SPARC	SPARC	34810.2
PUF60_HUMAN	Q9UHX1	Q9UHX1	PUF60	Poly(U)-binding-splicing factor PUF60	34760
NEXN_HUMAN	Q0ZGT2	Q0ZGT2	NEXN	Nexilin	34753.1
CDC5L_HUMAN	Q99459	Q99459	CDC5L	Cell division cycle 5-like protein	34737.9
LV136_HUMAN	A0A0B4J1U3	A0A0B4J1U3	IGLV1-36	Immunoglobulin lambda variable 1-36	34669.8
ARAP1_HUMAN	Q96P48	Q96P48	ARAP1	Arf-GAP with Rho-GAP domain, ANK repeat and PH domain-containing protein 1	34664.2
ZN185_HUMAN	O15231	O15231	ZNF185	Zinc finger protein 185	34644.9
STX12_HUMAN	Q86Y82	Q86Y82	STX12	Syntaxin-12	34602.2
RDH13_HUMAN	Q8NBN7	Q8NBN7	RDH13	Retinol dehydrogenase 13	34595.8
PHLB1_HUMAN	Q86UU1	Q86UU1	PHLDB1	Pleckstrin homology-like domain family B member 1	34558.5
EEA1_HUMAN	Q15075	Q15075	EEA1	Early endosome antigen 1	34499.7
DPYD_HUMAN	Q12882	Q12882	DPYD	Dihydropyrimidine dehydrogenase [NADP(+)]	34495
CLCC1_HUMAN	Q96S66	Q96S66	CLCC1	Chloride channel CLIC-like protein 1	34477.9
SYWC_HUMAN	P23381	P23381	WARS1	Tryptophan--tRNA ligase, cytoplasmic	34465.6
CATC_HUMAN	P53634	P53634	CTSC	Dipeptidyl peptidase 1	34439.9
OPA1_HUMAN	O60313	O60313	OPA1	Dynamin-like 120 kDa protein, mitochondrial	34414.9
C1QA_HUMAN	P02745	P02745	C1QA	Complement C1q subcomponent subunit A	34381.2
KAPCB_HUMAN	P22694	P22694	PRKACB	cAMP-dependent protein kinase catalytic subunit beta	34379
EMAL3_HUMAN	Q32P44	Q32P44	EML3	Echinoderm microtubule-associated protein-like 3	34362
KLC1_HUMAN	Q9NSK0;Q07866;Q9H0B6	Q07866	KLC1	Kinesin light chain 1	34344.9
VP13C_HUMAN	Q709C8	Q709C8	VPS13C	Intermembrane lipid transfer protein VPS13C	34341
CHM2A_HUMAN	O43633	O43633	CHMP2A	Charged multivesicular body protein 2a	34318.4
LTBP2_HUMAN	Q14767	Q14767	LTBP2	Latent-transforming growth factor beta-binding protein 2	34245.8
NNTM_HUMAN	Q13423	Q13423	NNT	NAD(P) transhydrogenase, mitochondrial	34214.9
KPRB_HUMAN	O60256	O60256	PRPSAP2	Phosphoribosyl pyrophosphate synthase-associated protein 2	34185.8
PUR6_HUMAN	P22234	P22234	PAICS	Bifunctional phosphoribosylaminoimidazole carboxylase/phosphoribosylaminoimidazole succinocarboxamide synthetase	34179.2
FBLI1_HUMAN	Q8WUP2	Q8WUP2	FBLIM1	Filamin-binding LIM protein 1	34133.5
PBDC1_HUMAN	Q9BVG4	Q9BVG4	PBDC1	Protein PBDC1	34125.2
VATH_HUMAN	Q9UI12	Q9UI12	ATP6V1H	V-type proton ATPase subunit H	34120.8
PDPR_HUMAN	Q8NCN5	Q8NCN5	PDPR	Pyruvate dehydrogenase phosphatase regulatory subunit, mitochondrial	34065
DNJB1_HUMAN	Q9UDY4;P25685	P25685	DNAJB1	DnaJ homolog subfamily B member 1	34011
OGFR_HUMAN	Q9NZT2	Q9NZT2	OGFR	Opioid growth factor receptor	33980.9
PLPP_HUMAN	Q96GD0	Q96GD0	PDXP	Chronophin	33950.4
RADI_HUMAN	P35241	P35241	RDX	Radixin	33932.6
TMOD3_HUMAN	Q9NYL9	Q9NYL9	TMOD3	Tropomodulin-3	33915
RPB2_HUMAN	P30876	P30876	POLR2B	DNA-directed RNA polymerase II subunit RPB2	33894
DP13A_HUMAN	Q9UKG1	Q9UKG1	APPL1	DCC-interacting protein 13-alpha	33811.8
H1BP3_HUMAN	Q53T59	Q53T59	HS1BP3	HCLS1-binding protein 3	33804.1
PCNP_HUMAN	Q8WW12	Q8WW12	PCNP	PEST proteolytic signal-containing nuclear protein	33768.1
IGHD_HUMAN	P01880	P01880	IGHD	Immunoglobulin heavy constant delta	33760.9
HS105_HUMAN	Q92598	Q92598	HSPH1	Heat shock protein 105 kDa	33752.8
MX2_HUMAN	P20592	P20592	MX2	Interferon-induced GTP-binding protein Mx2	33752.6
ALS_HUMAN	P35858	P35858	IGFALS	Insulin-like growth factor-binding protein complex acid labile subunit	33693
NICA_HUMAN	Q92542	Q92542	NCSTN	Nicastrin	33690.1
RAVR1_HUMAN	Q8IY67	Q8IY67	RAVER1	Ribonucleoprotein PTB-binding 1	33684.5
ICT1_HUMAN	Q14197	Q14197	MRPL58	Large ribosomal subunit protein mL62	33629.4
CO5A3_HUMAN	P25940	P25940	COL5A3	Collagen alpha-3(V) chain	33600.2
NFIB_HUMAN	O00712	O00712	NFIB	Nuclear factor 1 B-type	33597.4
ERO1A_HUMAN	Q96HE7	Q96HE7	ERO1A	ERO1-like protein alpha	33570
ABI1_HUMAN	Q9NYB9;Q8IZP0	Q8IZP0	ABI1	Abl interactor 1	33568.8
ARHG2_HUMAN	Q92974	Q92974	ARHGEF2	Rho guanine nucleotide exchange factor 2	33553.8
LMCD1_HUMAN	Q9NZU5	Q9NZU5	LMCD1	LIM and cysteine-rich domains protein 1	33547.2
AP1M1_HUMAN	Q9BXS5	Q9BXS5	AP1M1	AP-1 complex subunit mu-1	33529.8
RTRAF_HUMAN	Q9Y224	Q9Y224	RTRAF	RNA transcription, translation and transport factor protein	33525.4
CAF17_HUMAN	Q5T440	Q5T440	IBA57	Putative transferase CAF17, mitochondrial	33520.6
KIF23_HUMAN	Q02241	Q02241	KIF23	Kinesin-like protein KIF23	33479.8
ECM29_HUMAN	Q5VYK3	Q5VYK3	ECPAS	Proteasome adapter and scaffold protein ECM29	33459.6
ACTY_HUMAN	P42025	P42025	ACTR1B	Beta-centractin	33440.3
SPT5H_HUMAN	O00267	O00267	SUPT5H	Transcription elongation factor SPT5	33417.5
EXOC3_HUMAN	O60645	O60645	EXOC3	Exocyst complex component 3	33370.6
SURF4_HUMAN	O15260	O15260	SURF4	Surfeit locus protein 4	33361.2
FA98B_HUMAN	Q52LJ0	Q52LJ0	FAM98B	Protein FAM98B	33358.7
SPF45_HUMAN	Q96I25	Q96I25	RBM17	Splicing factor 45	33343.3
DAB2_HUMAN	P98082	P98082	DAB2	Disabled homolog 2	33295.8
GSDMD_HUMAN	P57764	P57764	GSDMD	Gasdermin-D	33253
LSP1_HUMAN	P33241	P33241	LSP1	Lymphocyte-specific protein 1	33189
AIMP1_HUMAN	Q12904	Q12904	AIMP1	Aminoacyl tRNA synthase complex-interacting multifunctional protein 1	33169.2
RAB8B_HUMAN	Q92930	Q92930	RAB8B	Ras-related protein Rab-8B	33106.5
ARL2_HUMAN	P36404	P36404	ARL2	ADP-ribosylation factor-like protein 2	33093.8
DKC1_HUMAN	O60832	O60832	DKC1	H/ACA ribonucleoprotein complex subunit DKC1	33086
DYH5_HUMAN	Q8TE73;Q96JB1	Q8TE73	DNAH5	Dynein axonemal heavy chain 5	33028.6
GIT1_HUMAN	Q9Y2X7	Q9Y2X7	GIT1	ARF GTPase-activating protein GIT1	32927.6
GT251_HUMAN	Q8NBJ5	Q8NBJ5	COLGALT1	Procollagen galactosyltransferase 1	32911.2
RABL6_HUMAN	Q3YEC7	Q3YEC7	RABL6	Rab-like protein 6	32898.4
SMC3_HUMAN	Q9UQE7	Q9UQE7	SMC3	Structural maintenance of chromosomes protein 3	32877.5
IFIT1_HUMAN	P09914	P09914	IFIT1	Interferon-induced protein with tetratricopeptide repeats 1	32834.4
KAD6_HUMAN	Q9Y3D8	Q9Y3D8	AK6	Adenylate kinase isoenzyme 6	32832.7
HIBCH_HUMAN	Q6NVY1	Q6NVY1	HIBCH	3-hydroxyisobutyryl-CoA hydrolase, mitochondrial	32791.4
MYO7A_HUMAN	Q13402	Q13402	MYO7A	Unconventional myosin-VIIa	32788.4
PKHA5_HUMAN	Q9HAU0	Q9HAU0	PLEKHA5	Pleckstrin homology domain-containing family A member 5	32781.6
GMPPB_HUMAN	Q9Y5P6	Q9Y5P6	GMPPB	Mannose-1-phosphate guanyltransferase beta	32770.9
NELFB_HUMAN	Q8WX92	Q8WX92	NELFB	Negative elongation factor B	32751.2
PKHO2_HUMAN	Q8TD55	Q8TD55	PLEKHO2	Pleckstrin homology domain-containing family O member 2	32733.8
OCAD1_HUMAN	Q9NX40	Q9NX40	OCIAD1	OCIA domain-containing protein 1	32679.3
FLOT2_HUMAN	Q14254	Q14254	FLOT2	Flotillin-2	32656.8
NNMT_HUMAN	P40261	P40261	NNMT	Nicotinamide N-methyltransferase	32655.5
UBP7_HUMAN	Q93009	Q93009	USP7	Ubiquitin carboxyl-terminal hydrolase 7	32622.1
PLRKT_HUMAN	Q9HBL7	Q9HBL7	PLGRKT	Plasminogen receptor (KT)	32591.4
FGOP2_HUMAN	Q9NVK5	Q9NVK5	FGFR1OP2	FGFR1 oncogene partner 2	32575.8
DLG1_HUMAN	Q12959	Q12959	DLG1	Disks large homolog 1	32535.6
PITH1_HUMAN	Q9GZP4	Q9GZP4	PITHD1	PITH domain-containing protein 1	32534.2
RS17_HUMAN	P08708	P08708	RPS17	Small ribosomal subunit protein eS17	32515.4
TMED1_HUMAN	Q13445	Q13445	TMED1	Transmembrane emp24 domain-containing protein 1	32501.3
VAMP3_HUMAN	Q15836	Q15836	VAMP3	Vesicle-associated membrane protein 3	32499.3
GPDM_HUMAN	P43304	P43304	GPD2	Glycerol-3-phosphate dehydrogenase, mitochondrial	32495.2
RAB5A_HUMAN	P20339	P20339	RAB5A	Ras-related protein Rab-5A	32476
CMPK2_HUMAN	Q5EBM0	Q5EBM0	CMPK2	UMP-CMP kinase 2, mitochondrial	32464.8
HPSE2_HUMAN	Q8WWQ2	Q8WWQ2	HPSE2	Inactive heparanase-2	32428.1
CHP1_HUMAN	Q99653	Q99653	CHP1	Calcineurin B homologous protein 1	32423.2
S23IP_HUMAN	Q9Y6Y8	Q9Y6Y8	SEC23IP	SEC23-interacting protein	32407.5
NUMBL_HUMAN	Q9Y6R0	Q9Y6R0	NUMBL	Numb-like protein	32395.8
CSTF2_HUMAN	Q9H0L4;P33240	P33240	CSTF2	Cleavage stimulation factor subunit 2	32383.1
NUP98_HUMAN	P52948	P52948	NUP98	Nuclear pore complex protein Nup98-Nup96	32362.2
PRPS1_HUMAN	P60891	P60891	PRPS1	Ribose-phosphate pyrophosphokinase 1	32352.6
H90B2_HUMAN	Q58FF8	Q58FF8	HSP90AB2P	Putative heat shock protein HSP 90-beta 2	32347.1
2ABA_HUMAN	P63151	P63151	PPP2R2A	Serine/threonine-protein phosphatase 2A 55 kDa regulatory subunit B alpha isoform	32258.9
PMVK_HUMAN	Q15126	Q15126	PMVK	Phosphomevalonate kinase	32251.8
UB2L6_HUMAN	O14933	O14933	UBE2L6	Ubiquitin/ISG15-conjugating enzyme E2 L6	32236.2
AGO2_HUMAN	Q9UL18;Q9UKV8;Q9H9G7	Q9UKV8	AGO2	Protein argonaute-2	32232.5
AP1G1_HUMAN	O43747	O43747	AP1G1	AP-1 complex subunit gamma-1	32210.8
FKB10_HUMAN	Q96AY3	Q96AY3	FKBP10	Peptidyl-prolyl cis-trans isomerase FKBP10	32207.8
JUPI2_HUMAN	Q9H910	Q9H910	JPT2	Jupiter microtubule associated homolog 2	32204.5
NIPS1_HUMAN	Q9BPW8	Q9BPW8	NIPSNAP1	Protein NipSnap homolog 1	32171.5
PPIL4_HUMAN	Q8WUA2	Q8WUA2	PPIL4	Peptidyl-prolyl cis-trans isomerase-like 4	32122
FABP4_HUMAN	P15090	P15090	FABP4	Fatty acid-binding protein, adipocyte	32099.2
MICA1_HUMAN	Q8TDZ2	Q8TDZ2	MICAL1	[F-actin]-monooxygenase MICAL1	32071.5
PI42A_HUMAN	P48426	P48426	PIP4K2A	Phosphatidylinositol 5-phosphate 4-kinase type-2 alpha	32054.6
TES_HUMAN	Q9UGI8	Q9UGI8	TES	Testin	32045.8
PTPA_HUMAN	Q15257	Q15257	PTPA	Serine/threonine-protein phosphatase 2A activator	32045.1
RL28_HUMAN	P46779	P46779	RPL28	Large ribosomal subunit protein eL28	32020.2
ST1A1_HUMAN	P50225;P50226	P50225	SULT1A1	Sulfotransferase 1A1	32005.2
ACINU_HUMAN	Q9UKV3	Q9UKV3	ACIN1	Apoptotic chromatin condensation inducer in the nucleus	31993
SCRN2_HUMAN	Q96FV2	Q96FV2	SCRN2	Secernin-2	31964
RL17_HUMAN	P18621	P18621	RPL17	Large ribosomal subunit protein uL22	31944.1
KDSR_HUMAN	Q06136	Q06136	KDSR	3-ketodihydrosphingosine reductase	31940.4
T126A_HUMAN	Q9H061	Q9H061	TMEM126A	Transmembrane protein 126A	31939.2
CYTC_HUMAN	P01034	P01034	CST3	Cystatin-C	31935.4
STRAP_HUMAN	Q9Y3F4	Q9Y3F4	STRAP	Serine-threonine kinase receptor-associated protein	31928.2
GCN1_HUMAN	Q92616	Q92616	GCN1	Stalled ribosome sensor GCN1	31924
PSB5_HUMAN	P28074	P28074	PSMB5	Proteasome subunit beta type-5	31911
SRP68_HUMAN	Q9UHB9	Q9UHB9	SRP68	Signal recognition particle subunit SRP68	31884
TM9S4_HUMAN	Q92544	Q92544	TM9SF4	Transmembrane 9 superfamily member 4	31853
E2AK2_HUMAN	P19525	P19525	EIF2AK2	Interferon-induced, double-stranded RNA-activated protein kinase	31796.9
CYB5_HUMAN	P00167	P00167	CYB5A	Cytochrome b5	31759
CARM1_HUMAN	Q86X55	Q86X55	CARM1	Histone-arginine methyltransferase CARM1	31757.4
MTAP_HUMAN	Q13126	Q13126	MTAP	S-methyl-5'-thioadenosine phosphorylase	31750.6
RBM15_HUMAN	Q96T37	Q96T37	RBM15	RNA-binding protein 15	31723.5
AHSA1_HUMAN	O95433	O95433	AHSA1	Activator of 90 kDa heat shock protein ATPase homolog 1	31705.2
NFIA_HUMAN	Q12857	Q12857	NFIA	Nuclear factor 1 A-type	31670.2
GSTM1_HUMAN	P46439;P09488	P09488	GSTM1	Glutathione S-transferase Mu 1	31665.4
TRAF1_HUMAN	Q13077	Q13077	TRAF1	TNF receptor-associated factor 1	31653.8
QCR7_HUMAN	P14927	P14927	UQCRB	Cytochrome b-c1 complex subunit 7	31629.5
VPS36_HUMAN	Q86VN1	Q86VN1	VPS36	Vacuolar protein-sorting-associated protein 36	31624.7
RUXF_HUMAN	P62306	P62306	SNRPF	Small nuclear ribonucleoprotein F	31606.1
CPT1A_HUMAN	P50416	P50416	CPT1A	Carnitine O-palmitoyltransferase 1, liver isoform	31590.4
CBR3_HUMAN	O75828	O75828	CBR3	Carbonyl reductase [NADPH] 3	31585.9
JIP4_HUMAN	O60271	O60271	SPAG9	C-Jun-amino-terminal kinase-interacting protein 4	31573.5
MAP9_HUMAN	Q49MG5	Q49MG5	MAP9	Microtubule-associated protein 9	31554.4
ATLA3_HUMAN	Q6DD88	Q6DD88	ATL3	Atlastin-3	31541.8
PPIE_HUMAN	Q9UNP9	Q9UNP9	PPIE	Peptidyl-prolyl cis-trans isomerase E	31539.1
TF65_HUMAN	Q04206	Q04206	RELA	Transcription factor p65	31527.8
DTNA_HUMAN	Q9Y4J8	Q9Y4J8	DTNA	Dystrobrevin alpha	31511.8
AAMDC_HUMAN	Q9H7C9	Q9H7C9	AAMDC	Mth938 domain-containing protein	31511
GCDH_HUMAN	Q92947	Q92947	GCDH	Glutaryl-CoA dehydrogenase, mitochondrial	31495.4
ZN512_HUMAN	Q96ME7	Q96ME7	ZNF512	Zinc finger protein 512	31490
ACL6A_HUMAN	O96019	O96019	ACTL6A	Actin-like protein 6A	31489.2
ATP5J_HUMAN	P18859	P18859	ATP5PF	ATP synthase-coupling factor 6, mitochondrial	31454.1
RL1D1_HUMAN	O76021	O76021	RSL1D1	Ribosomal L1 domain-containing protein 1	31450.7
PP12C_HUMAN	Q9BZL4	Q9BZL4	PPP1R12C	Protein phosphatase 1 regulatory subunit 12C	31424.4
ARL8A_HUMAN	Q96BM9	Q96BM9	ARL8A	ADP-ribosylation factor-like protein 8A	31421.4
RAB23_HUMAN	Q9ULC3	Q9ULC3	RAB23	Ras-related protein Rab-23	31420.6
AL3A2_HUMAN	P51648	P51648	ALDH3A2	Aldehyde dehydrogenase family 3 member A2	31416.9
GPX4_HUMAN	P36969	P36969	GPX4	Phospholipid hydroperoxide glutathione peroxidase	31414.5
TPP2_HUMAN	P29144	P29144	TPP2	Tripeptidyl-peptidase 2	31385.5
RS23_HUMAN	P62266	P62266	RPS23	Small ribosomal subunit protein uS12	31344.8
PREP_HUMAN	Q5JRX3	Q5JRX3	PITRM1	Presequence protease, mitochondrial	31341.8
ARFP1_HUMAN	P53367	P53367	ARFIP1	Arfaptin-1	31307.5
CXCL7_HUMAN	P02775	P02775	PPBP	Platelet basic protein	31292.8
RUSF1_HUMAN	Q96GQ5	Q96GQ5	RUSF1	RUS family member 1	31284.8
STAU1_HUMAN	O95793	O95793	STAU1	Double-stranded RNA-binding protein Staufen homolog 1	31256.4
RT27_HUMAN	Q92552	Q92552	MRPS27	Small ribosomal subunit protein mS27	31238.2
BAX_HUMAN	Q07812	Q07812	BAX	Apoptosis regulator BAX	31222.3
RS12_HUMAN	P25398	P25398	RPS12	Small ribosomal subunit protein eS12	31198.8
SON_HUMAN	P18583	P18583	SON	Protein SON	31198.2
SHLB1_HUMAN	Q9Y371	Q9Y371	SH3GLB1	Endophilin-B1	31166
TAP1_HUMAN	Q03518	Q03518	TAP1	Antigen peptide transporter 1	31153.1
PLOD3_HUMAN	O60568	O60568	PLOD3	Multifunctional procollagen lysine hydroxylase and glycosyltransferase LH3	31099.7
PLOD1_HUMAN	Q02809	Q02809	PLOD1	Procollagen-lysine,2-oxoglutarate 5-dioxygenase 1	31098.3
SFRP4_HUMAN	Q6FHJ7	Q6FHJ7	SFRP4	Secreted frizzled-related protein 4	31089.9
TR112_HUMAN	Q9UI30	Q9UI30	TRMT112	Multifunctional methyltransferase subunit TRM112-like protein	31077.9
BAZ1B_HUMAN	Q9UIG0	Q9UIG0	BAZ1B	Tyrosine-protein kinase BAZ1B	31047
IPO9_HUMAN	Q96P70	Q96P70	IPO9	Importin-9	31012.2
ARM10_HUMAN	Q8N2F6	Q8N2F6	ARMC10	Armadillo repeat-containing protein 10	31011.7
LV325_HUMAN	P01717	P01717	IGLV3-25	Immunoglobulin lambda variable 3-25	31003
VMA21_HUMAN	Q3ZAQ7	Q3ZAQ7	VMA21	Vacuolar ATPase assembly integral membrane protein VMA21	30999.3
MAP1B_HUMAN	P46821	P46821	MAP1B	Microtubule-associated protein 1B	30981.7
ACDSB_HUMAN	P45954	P45954	ACADSB	Short/branched chain specific acyl-CoA dehydrogenase, mitochondrial	30953.7
PYGL_HUMAN	P06737	P06737	PYGL	Glycogen phosphorylase, liver form	30942.2
ROCK1_HUMAN	Q13464	Q13464	ROCK1	Rho-associated protein kinase 1	30912
IL16_HUMAN	Q14005	Q14005	IL16	Pro-interleukin-16	30878
SF3A3_HUMAN	Q12874	Q12874	SF3A3	Splicing factor 3A subunit 3	30859.3
MP2K1_HUMAN	Q02750	Q02750	MAP2K1	Dual specificity mitogen-activated protein kinase kinase 1	30839.5
PDLI3_HUMAN	Q53GG5	Q53GG5	PDLIM3	PDZ and LIM domain protein 3	30831.2
SEP10_HUMAN	Q9P0V9	Q9P0V9	SEPTIN10	Septin-10	30819.5
DEMA_HUMAN	Q08495	Q08495	DMTN	Dematin	30804.1
PGH1_HUMAN	P23219	P23219	PTGS1	Prostaglandin G/H synthase 1	30792.4
ZRAB2_HUMAN	O95218	O95218	ZRANB2	Zinc finger Ran-binding domain-containing protein 2	30785.8
DNS2A_HUMAN	O00115	O00115	DNASE2	Deoxyribonuclease-2-alpha	30778.9
PLS3_HUMAN	Q9NRY6	Q9NRY6	PLSCR3	Phospholipid scramblase 3	30745.6
GNL1_HUMAN	P36915	P36915	GNL1	Guanine nucleotide-binding protein-like 1	30652.6
BICRA_HUMAN	Q9NZM4	Q9NZM4	BICRA	BRD4-interacting chromatin-remodeling complex-associated protein	30652.2
RBM25_HUMAN	P49756	P49756	RBM25	RNA-binding protein 25	30647.5
CORO7_HUMAN	P57737	P57737	CORO7	Coronin-7	30635.8
MYL6B_HUMAN	P14649	P14649	MYL6B	Myosin light chain 6B	30623.2
RAGP1_HUMAN	P46060	P46060	RANGAP1	Ran GTPase-activating protein 1	30622.2
UB2L3_HUMAN	A0A1B0GUS4;P68036	P68036	UBE2L3	Ubiquitin-conjugating enzyme E2 L3	30613.8
VATE1_HUMAN	P36543	P36543	ATP6V1E1	V-type proton ATPase subunit E 1	30588.5
EPS15_HUMAN	P42566	P42566	EPS15	Epidermal growth factor receptor substrate 15	30507.6
RUFY1_HUMAN	Q96T51	Q96T51	RUFY1	RUN and FYVE domain-containing protein 1	30497.9
CSTF3_HUMAN	Q12996	Q12996	CSTF3	Cleavage stimulation factor subunit 3	30492.1
SUCB1_HUMAN	Q9P2R7	Q9P2R7	SUCLA2	Succinate--CoA ligase [ADP-forming] subunit beta, mitochondrial	30491.7
CPN2_HUMAN	P22792	P22792	CPN2	Carboxypeptidase N subunit 2	30433.1
KGP1_HUMAN	Q13976	Q13976	PRKG1	cGMP-dependent protein kinase 1	30427.1
RHG17_HUMAN	Q68EM7	Q68EM7	ARHGAP17	Rho GTPase-activating protein 17	30423.9
MP2K6_HUMAN	P52564	P52564	MAP2K6	Dual specificity mitogen-activated protein kinase kinase 6	30417.9
PON1_HUMAN	P27169	P27169	PON1	Serum paraoxonase/arylesterase 1	30405.3
UFD1_HUMAN	Q92890	Q92890	UFD1	Ubiquitin recognition factor in ER-associated degradation protein 1	30404.6
MBOA7_HUMAN	Q96N66	Q96N66	MBOAT7	Lysophospholipid acyltransferase 7	30370.1
DDX21_HUMAN	Q9NR30	Q9NR30	DDX21	Nucleolar RNA helicase 2	30369.2
MCCA_HUMAN	Q96RQ3	Q96RQ3	MCCC1	Methylcrotonoyl-CoA carboxylase subunit alpha, mitochondrial	30366.3
C1R_HUMAN	P00736	P00736	C1R	Complement C1r subcomponent	30324.2
ESRP1_HUMAN	Q9H6T0;Q6NXG1	Q6NXG1	ESRP1	Epithelial splicing regulatory protein 1	30284.1
NDUC2_HUMAN	O95298	O95298	NDUFC2	NADH dehydrogenase [ubiquinone] 1 subunit C2	30282
4F2_HUMAN	P08195	P08195	SLC3A2	4F2 cell-surface antigen heavy chain	30276.9
PP6R3_HUMAN	Q5H9R7	Q5H9R7	PPP6R3	Serine/threonine-protein phosphatase 6 regulatory subunit 3	30261.9
TRI25_HUMAN	Q14258	Q14258	TRIM25	E3 ubiquitin/ISG15 ligase TRIM25	30261
AGM1_HUMAN	O95394	O95394	PGM3	Phosphoacetylglucosamine mutase	30257.4
ODB2_HUMAN	P11182	P11182	DBT	Lipoamide acyltransferase component of branched-chain alpha-keto acid dehydrogenase complex, mitochondrial	30212.3
LV861_HUMAN	A0A075B6I0	A0A075B6I0	IGLV8-61	Immunoglobulin lambda variable 8-61	30179.7
RAB4A_HUMAN	P20338	P20338	RAB4A	Ras-related protein Rab-4A	30177.7
NUDT5_HUMAN	Q9UKK9	Q9UKK9	NUDT5	ADP-sugar pyrophosphatase	30151.2
MBB1A_HUMAN	Q9BQG0	Q9BQG0	MYBBP1A	Myb-binding protein 1A	30144
SAR1B_HUMAN	Q9Y6B6	Q9Y6B6	SAR1B	GTP-binding protein SAR1b	30134
CSN1_HUMAN	Q13098	Q13098	GPS1	COP9 signalosome complex subunit 1	30103.3
PUR4_HUMAN	O15067	O15067	PFAS	Phosphoribosylformylglycinamidine synthase	30087.8
PSIP1_HUMAN	O75475	O75475	PSIP1	PC4 and SFRS1-interacting protein	30081
PAFA2_HUMAN	Q99487	Q99487	PAFAH2	Platelet-activating factor acetylhydrolase 2, cytoplasmic	29999.7
LIN7C_HUMAN	Q9NUP9	Q9NUP9	LIN7C	Protein lin-7 homolog C	29981.9
LTBP1_HUMAN	Q14766	Q14766	LTBP1	Latent-transforming growth factor beta-binding protein 1	29932.4
SNTB1_HUMAN	Q13884	Q13884	SNTB1	Beta-1-syntrophin	29914.9
NDUBB_HUMAN	Q9NX14	Q9NX14	NDUFB11	NADH dehydrogenase [ubiquinone] 1 beta subcomplex subunit 11, mitochondrial	29892.6
CD5L_HUMAN	O43866	O43866	CD5L	CD5 antigen-like	29890.6
EDC4_HUMAN	Q6P2E9	Q6P2E9	EDC4	Enhancer of mRNA-decapping protein 4	29887.5
ANO6_HUMAN	Q4KMQ2	Q4KMQ2	ANO6	Anoctamin-6	29876.3
CHM2B_HUMAN	Q9UQN3	Q9UQN3	CHMP2B	Charged multivesicular body protein 2b	29857.8
GLYR1_HUMAN	Q49A26	Q49A26	GLYR1	Cytokine-like nuclear factor N-PAC	29852.5
ATOX1_HUMAN	O00244	O00244	ATOX1	Copper transport protein ATOX1	29836.2
FBN3_HUMAN	Q75N90	Q75N90	FBN3	Fibrillin-3	29805.3
ZC3HF_HUMAN	Q8WU90	Q8WU90	ZC3H15	Zinc finger CCCH domain-containing protein 15	29804
[truncated: 4,669 more rows]
