# Supplementary material for: Spatial proteomics of ovarian cancer precursors delineates early disease changes and drug targets
Source: Mol Syst Biol. 2025 Nov 13;22(1):7–41. doi: 10.1038/s44320-025-00168-4 (PMC12759074; doi:10.1038/s44320-025-00168-4)
Supplement: Supplementary file 10 — Dataset EV4 [file 44320_2025_168_MOESM10_ESM.xlsx]

## Sheet: Legend
Dataset EV4. Student's t-test results used for differential abundance analysis and visualized in the volcano plot figure 3B. Pairwise proteomic comparison between atypical (light-pink, 4 samples) and NFTE samples (light blue, 31 samples). Markers with the highest fold change are highlighted (two-sided t-test, permutation-based FDR < 0.05).

## Sheet: Dataset EV4
Dataset EV4. Student's t-test results used for differential abundance analysis and visualized in the volcano plot figure 3B.
Gene	Protein Group	Protein ID	Protein name	First protein description	T-test difference (pre-malignant vs. normal FTE, log2)	T-test statistic	T-test p-value (-log10)	T-test q-value (-log10)
NUDT4B	A0A024RBG1	A0A024RBG1	NUD4B_HUMAN	Diphosphoinositol polyphosphate phosphohydrolase NUDT4B	-0.214404	-1.13173	0.57527	0.519693
IGKV3-7	A0A075B6H7	A0A075B6H7;A0A0C4DH90;A0A0C4DH55;P01624	KV37_HUMAN	Probable non-functional immunoglobulin kappa variable 3-7	1.18914	0.973503	0.471873	0.588282
IGLV3-10	A0A075B6K4	A0A075B6K4;A0A075B6K0	LV310_HUMAN	Immunoglobulin lambda variable 3-10	1.37337	2.09459	1.35689	0.223691
IGKV2-28;IGKV2D-28	A0A075B6P5;P01615	A0A075B6P5;P01615	KV228_HUMAN;KVD28_HUMAN	Immunoglobulin kappa variable 2-28	0.480906	0.946192	0.454782	0.599379
IGHV3OR16-12	A0A075B7B8	A0A075B7B8	A0A075B7B8_HUMAN	Immunoglobulin heavy variable 3/OR16-12 (non-functional) (Fragment)	0.657345	1.13117	0.574894	0.51948
IGHV1OR15-1	A0A075B7D0	A0A075B7D0	A0A075B7D0_HUMAN	Immunoglobulin heavy variable 1/OR15-1 (non-functional) (Fragment)	-0.316816	-0.366047	0.144683	0.856955
IGKV3D-15	A0A087WSY6	A0A087WSY6	KVD15_HUMAN	Immunoglobulin kappa variable 3D-15	0.713445	1.29113	0.686915	0.456366
CCDC187	A0A096LP49	A0A096LP49	CC187_HUMAN	Coiled-coil domain-containing protein 187	-0.563959	-1.32388	0.710767	0.443205
IGKV3-11;IGKV3D-11	A0A0A0MRZ8;P04433	A0A0A0MRZ8;P04433	KV311_HUMAN;KVD11_HUMAN	Immunoglobulin kappa variable 3D-11	1.82771	2.43191	1.68591	0.160574
IGHV3-49	A0A0A0MS15	A0A0B4J1V6;A0A0A0MS15	HV349_HUMAN	Immunoglobulin heavy variable 3-49	1.1722	2.12077	1.3815	0.217801
IGHV6-1	A0A0B4J1U7	A0A0B4J1U7	HV601_HUMAN	Immunoglobulin heavy variable 6-1	2.08472	3.3955	2.74477	0.0594617
IGHV3-15	A0A0B4J1V0	A0A0B4J1V0	HV315_HUMAN	Immunoglobulin heavy variable 3-15	1.72594	2.26203	1.51704	0.191206
GATD3;GATD3B	A0A0B4J2D5;P0DPI2	P0DPI2;A0A0B4J2D5	GAL3A_HUMAN;GAL3B_HUMAN	Putative glutamine amidotransferase-like class 1 domain-containing protein 3B, mitochondrial	-0.425431	-1.99611	1.26577	0.244271
IGKV3D-20	A0A0C4DH25	A0A0C4DH25	KVD20_HUMAN	Immunoglobulin kappa variable 3D-20	1.6926	2.07034	1.33424	0.228738
IGHV3-35	A0A0C4DH35	A0A0C4DH35	HV335_HUMAN	Probable non-functional immunoglobulin heavy variable 3-35	0.634761	1.37302	0.747132	0.425305
IGHV5-51	A0A0C4DH38	A0A0C4DH38	HV551_HUMAN	Immunoglobulin heavy variable 5-51	0.354681	0.737622	0.331654	0.691417
IGHV4-30-4;IGHV4-34;IGHV4-38-2;IGHV4-39;IGHV4-59;IGHV4-61	A0A0C4DH41;P01824;P01825;P06331;P0DP06;P0DP08	P0DP06;P0DP08;P01824;P01825;A0A0C4DH41;A0A0J9YWU9;P06331	HV434_HUMAN;HV439_HUMAN;HV459_HUMAN;HV461_HUMAN;HVD34_HUMAN;HVD82_HUMAN	Immunoglobulin heavy variable 4-61	0.784856	1.77651	1.07125	0.297227
IGHV3-64D	A0A0J9YX35	A0A0J9YX35	HV64D_HUMAN	Immunoglobulin heavy variable 3-64D	0.517786	1.00602	0.492515	0.573412
CHD9NB	A0A1B0GV96	A0A1B0GV96	CHD9N_HUMAN	CHD9 neighbor protein	-0.726765	-1.11565	0.564425	0.525632
GNG5B	A0A804HLA8	A0A804HLA8;P63218	GBG5B_HUMAN	Guanine nucleotide-binding protein G(I)/G(S)/G(O) subunit gamma-5B	0.531766	1.11699	0.565328	0.52512
LOC400499	A0A8Q3SIG1	A0A8Q3SIG1	A0A8Q3SIG1_HUMAN	Vitellogenin domain-containing protein	-0.105666	-0.317176	0.123143	0.878981
RBM47	A0AV96	A0AV96	RBM47_HUMAN	RNA-binding protein 47	-0.425108	-3.86782	3.31082	0.0347573
IFT56	A0AVF1	A0AVF1	IFT56_HUMAN	Intraflagellar transport protein 56	-0.968065	-2.24167	1.49722	0.194711
TMEM129	A0AVI4	A0AVI4	TM129_HUMAN	E3 ubiquitin-protein ligase TM129	0.00598015	0.0178358	0.00617717	0.993161
UBA6	A0AVT1	A0AVT1	UBA6_HUMAN	Ubiquitin-like modifier-activating enzyme 6	-0.247916	-1.79676	1.08867	0.291865
ESYT2	A0FGR8	A0FGR8	ESYT2_HUMAN	Extended synaptotagmin-2	0.0440647	0.489491	0.202225	0.806896
SHTN1	A0MZ66	A0MZ66	SHOT1_HUMAN	Shootin-1	-0.414747	-4.17343	3.688	0.025298
TMEM223	A0PJW6	A0PJW6	TM223_HUMAN	Transmembrane protein 223	0.426531	1.50862	0.851053	0.377227
DAPL1	A0PJW8	A0PJW8	DAPL1_HUMAN	Death-associated protein-like 1	-0.725701	-1.07389	0.536611	0.542103
CFAP119	A1A4V9	A1A4V9	CF119_HUMAN	Cilia- and flagella-associated protein 119	-1.02509	-2.55586	1.81294	0.143964
ANO9	A1A5B4	A1A5B4	ANO9_HUMAN	Anoctamin-9	-0.578729	-1.93147	1.20725	0.258414
BICDL2	A1A5D9	A1A5D9	BICL2_HUMAN	BICD family-like cargo adapter 2	-0.551278	-2.14943	1.40863	0.211639
ARHGEF37	A1IGU5	A1IGU5	ARH37_HUMAN	Rho guanine nucleotide exchange factor 37	-0.726642	-5.07136	4.82541	0.00940102
MEX3A	A1L020	Q86XN8;Q6ZN04;Q5U5Q3;A1L020	MEX3A_HUMAN	RNA-binding protein MEX3A	1.30512	4.09274	3.58773	0.0280165
ILVBL	A1L0T0	A1L0T0	HACL2_HUMAN	2-hydroxyacyl-CoA lyase 2	0.202403	1.51162	0.853412	0.376121
PLEKHG3	A1L390	A1L390	PKHG3_HUMAN	Pleckstrin homology domain-containing family G member 3	-0.0516053	-0.336705	0.131666	0.870589
SH3PXD2B	A1X283	A1X283	SPD2B_HUMAN	SH3 and PX domain-containing protein 2B	0.219938	1.41775	0.780842	0.408906
CIBAR1	A1XBS5	A1XBS5	CBAR1_HUMAN	CBY1-interacting BAR domain-containing protein 1	-1.14819	-2.85198	2.12838	0.108765
MACROD2	A1Z1Q3	A1Z1Q3	MACD2_HUMAN	ADP-ribose glycohydrolase MACROD2	-0.515671	-2.44579	1.69998	0.158754
CCDC78	A2IDD5	A2IDD5	CCD78_HUMAN	Coiled-coil domain-containing protein 78	-1.64164	-3.07935	2.38089	0.0847316
NBAS	A2RRP1	A2RRP1	NBAS_HUMAN	NBAS subunit of NRZ tethering complex	-0.0975316	-1.44781	0.803813	0.397668
TARS3	A2RTX5	A2RTX5	SYTC2_HUMAN	Threonine--tRNA ligase 2, cytoplasmic	-0.255731	-1.65846	0.971826	0.332341
TYW5	A2RUC4	A2RUC4	TYW5_HUMAN	tRNA wybutosine-synthesizing protein 5	0.284494	2.54941	1.80625	0.144212
DENND3	A2RUS2	A2RUS2	DEND3_HUMAN	DENN domain-containing protein 3	0.147833	0.429567	0.173729	0.832374
DCDC2B	A2VCK2	A2VCK2	DCD2B_HUMAN	Doublecortin domain-containing protein 2B	-1.10814	-1.9208	1.19769	0.260085
VWA8	A3KMH1	A3KMH1	VWA8_HUMAN	von Willebrand factor A domain-containing protein 8	0.0332077	0.150615	0.0549275	0.945543
SBNO1	A3KN83	A3KN83	SBNO1_HUMAN	Protein strawberry notch homolog 1	0.150491	1.9215	1.19832	0.25984
CRPPA	A4D126	A4D126	ISPD_HUMAN	D-ribitol-5-phosphate cytidylyltransferase	-0.752384	-1.56972	0.899557	0.358805
GTPBP10	A4D1E9	A4D1E9	GTPBA_HUMAN	GTP-binding protein 10	0.385695	2.21708	1.47342	0.198713
WDR91	A4D1P6	A4D1P6	WDR91_HUMAN	WD repeat-containing protein 91	-0.467523	-3.26223	2.58972	0.0687116
DENND11	A4D1U4	A4D1U4	DEN11_HUMAN	DENN domain-containing protein 11	0.174041	0.925864	0.442206	0.60735
MBLAC1	A4D2B0	A4D2B0	MBLC1_HUMAN	Metallo-beta-lactamase domain-containing protein 1	-0.577422	-1.22108	0.636935	0.484007
CFAP90	A4QMS7	A4QMS7	CFA90_HUMAN	Cilia- and flagella-associated protein 90	-0.76652	-1.21847	0.635102	0.485352
VPS37C	A5D8V6	A5D8V6	VP37C_HUMAN	Vacuolar protein sorting-associated protein 37C	-0.16858	-1.42637	0.7874	0.405586
ODAD3	A5D8V7	A5D8V7	ODAD3_HUMAN	Outer dynein arm-docking complex subunit 3	-1.78769	-2.8611	2.13835	0.107374
FAM149A	A5PLN7	A5PLN7	F149A_HUMAN	Protein FAM149A	-0.567067	-1.91697	1.19427	0.261237
TRAPPC13	A5PLN9	A5PLN9	TPC13_HUMAN	Trafficking protein particle complex subunit 13	0.0332385	0.188927	0.0699137	0.932481
CNOT1	A5YKK6	A5YKK6	CNOT1_HUMAN	CCR4-NOT transcription complex subunit 1	0.0580851	0.634713	0.275731	0.737915
CDHR4	A6H8M9	A6H8M9	CDHR4_HUMAN	Cadherin-related family member 4	-1.20792	-1.89013	1.17037	0.267801
MAP1LC3B;MAP1LC3B2	A6NCE7;Q9GZQ8	Q9GZQ8;A6NCE7	MLP3B_HUMAN;MP3B2_HUMAN	Microtubule-associated proteins 1A/1B light chain 3 beta 2	-1.25522	-2.07425	1.33788	0.227945
VWA3A	A6NCI4	A6NCI4	VWA3A_HUMAN	von Willebrand factor A domain-containing protein 3A	-0.795502	-1.30852	0.699538	0.449137
PALM3	A6NDB9	A6NDB9	PALM3_HUMAN	Paralemmin-3	-0.554605	-1.40973	0.774759	0.412387
PGP	A6NDG6	A6NDG6	PGP_HUMAN	Glycerol-3-phosphate phosphatase	0.513637	3.94296	3.40288	0.0320139
RIMOC1	A6NDU8	A6NDU8	RIMC1_HUMAN	RAB7A-interacting MON1-CCZ1 complex subunit 1	0.151737	1.16377	0.597115	0.508198
RCCD1	A6NED2	A6NED2	RCCD1_HUMAN	RCC1 domain-containing protein 1	-0.541675	-2.26967	1.5245	0.189815
EFCAB10	A6NFE3	A6NFE3	EFC10_HUMAN	EF-hand calcium-binding domain-containing protein 10	-0.902885	-1.35645	0.734796	0.430458
ZNF316	A6NFI3	A6NFI3	ZN316_HUMAN	Zinc finger protein 316	0.0596008	0.383341	0.152473	0.851374
CFAP73	A6NFT4	A6NFT4	CFA73_HUMAN	Cilia- and flagella-associated protein 73	-1.02209	-1.84478	1.13041	0.279421
CCDC160	A6NGH7	A6NGH7	CC160_HUMAN	Coiled-coil domain-containing protein 160	0.264623	1.55063	0.884297	0.363481
TUBAL3	A6NHL2	A6NHL2	TBAL3_HUMAN	Tubulin alpha chain-like 3	-0.0378568	-0.157548	0.0576085	0.942832
SMCHD1	A6NHR9	A6NHR9	SMHD1_HUMAN	Structural maintenance of chromosomes flexible hinge domain-containing protein 1	0.205532	2.13048	1.39068	0.215545
ARHGAP42	A6NI28	A6NI28	RHG42_HUMAN	Rho GTPase-activating protein 42	0.456517	2.08151	1.34466	0.226725
CCDC69	A6NI79	A6NI79	CCD69_HUMAN	Coiled-coil domain-containing protein 69	-0.532322	-1.24159	0.651424	0.476598
UNC119B	A6NIH7	A6NIH7;Q13432	U119B_HUMAN	Protein unc-119 homolog B	-0.595334	-4.60873	4.23546	0.0148098
METTL15	A6NJ78	A6NJ78	MET15_HUMAN	12S rRNA N4-methylcytidine (m4C) methyltransferase	-0.136801	-1.13577	0.578008	0.518949
SOWAHD	A6NJG2	A6NJG2	SWAHD_HUMAN	Ankyrin repeat domain-containing protein SOWAHD	-0.223548	-1.19263	0.617047	0.497044
FAM166C	A6NJV1	A6NJV1	F166C_HUMAN	Protein FAM166C	-1.13401	-1.55583	0.888439	0.36238
LIPT2	A6NK58	A6NK58	LIPT2_HUMAN	Putative lipoyltransferase 2, mitochondrial	-0.0110194	-0.0520773	0.0182806	0.980759
CCDC85C	A6NKD9	A6NKD9	CC85C_HUMAN	Coiled-coil domain-containing protein 85C	0.209208	1.30358	0.695944	0.451086
ZFP92	A6NM28	A6NM28	ZFP92_HUMAN	Zinc finger protein 92 homolog	0.0522594	0.159956	0.058543	0.941907
SNTN	A6NMZ2	A6NMZ2	SNTAN_HUMAN	Sentan	-1.16423	-1.6823	0.991604	0.325069
COL6A6	A6NMZ7	A6NMZ7	CO6A6_HUMAN	Collagen alpha-6(VI) chain	-0.142788	-0.269554	0.102823	0.896851
C2orf81	A6NN90	A6NN90	CB081_HUMAN	Uncharacterized protein C2orf81	-1.21486	-2.46906	1.72365	0.155324
LRRIQ3	A6PVS8	A6PVS8	LRIQ3_HUMAN	Leucine-rich repeat and IQ domain-containing protein 3	-0.548933	-0.878258	0.41324	0.629382
C4orf47	A7E2U8	A7E2U8	CD047_HUMAN	UPF0602 protein C4orf47	-1.31443	-2.01958	1.28727	0.239472
ZSWIM8	A7E2V4	A7E2V4	ZSWM8_HUMAN	Zinc finger SWIM domain-containing protein 8	-0.11798	-1.13935	0.580443	0.518257
ARHGAP32	A7KAX9	A7KAX9	RHG32_HUMAN	Rho GTPase-activating protein 32	-0.55799	-4.97683	4.70444	0.0105164
POM121C	A8CG34	Q96HA1;A6NF01;A8CG34	P121C_HUMAN	Nuclear envelope pore membrane protein POM 121C	0.0582262	0.545483	0.229818	0.780491
A2ML1	A8K2U0	A8K2U0	A2ML1_HUMAN	Alpha-2-macroglobulin-like protein 1	1.05721	1.42401	0.785606	0.406481
EFCAB7	A8K855	A8K855	EFCB7_HUMAN	EF-hand calcium-binding domain-containing protein 7	-0.961468	-2.71975	1.98553	0.121445
SFI1	A8K8P3	A8K8P3	SFI1_HUMAN	Protein SFI1 homolog	-0.703702	-2.32881	1.58268	0.177894
YDJC	A8MPS7	A8MPS7	YDJC_HUMAN	Carbohydrate deacetylase	-1.62578	-6.71833	6.92666	0.00410811
ZBBX	A8MT70	A8MT70	ZBBX_HUMAN	Zinc finger B-box domain-containing protein 1	-1.16061	-1.84402	1.12974	0.279505
FAM166B	A8MTA8	A8MTA8	F166B_HUMAN	Protein FAM166B	-0.890981	-1.29836	0.69215	0.453449
FAM171A2	A8MVW0	A8MVW0	F1712_HUMAN	Protein FAM171A2	0.990469	1.94997	1.2239	0.254581
PHF20L1	A8MW92	A8MW92	P20L1_HUMAN	PHD finger protein 20-like protein 1	0.0912568	0.143966	0.052369	0.948776
SNRPG;SNRPGP15	A8MWD9;P62308	A8MWD9;P62308	RUXGL_HUMAN;RUXG_HUMAN	Putative small nuclear ribonucleoprotein G-like protein 15	-0.180433	-0.951642	0.458175	0.597729
NUDT19	A8MXV4	A8MXV4	NUD19_HUMAN	Acyl-coenzyme A diphosphatase NUDT19	0.741288	3.96958	3.43561	0.0311986
TTC34	A8MYJ7	A8MYJ7	TTC34_HUMAN	Tetratricopeptide repeat protein 34	-0.182132	-0.507672	0.211082	0.797117
ODF3B	A8MYP8	A8MYP8	ODF3B_HUMAN	Outer dense fiber protein 3B	-1.45037	-2.26322	1.51821	0.190963
MIF4GD	A9UHW6	A9UHW6	MI4GD_HUMAN	MIF4G domain-containing protein	-0.144968	-0.779886	0.355546	0.673042
MYO1G	B0I1T2	B0I1T2	MYO1G_HUMAN	Unconventional myosin-Ig	0.0529825	0.325429	0.126731	0.876118
FHAD1	B1AJZ9	B1AJZ9	FHAD1_HUMAN	Forkhead-associated domain-containing protein 1	-0.769359	-1.2685	0.67061	0.465577
ESPN	B1AK53	B1AK53	ESPN_HUMAN	Espin	-0.286438	-0.739549	0.332732	0.690737
RSPH10B;RSPH10B2	B2RC85;P0C881	P0C881;B2RC85	R10B1_HUMAN;R10B2_HUMAN	Radial spoke head 10 homolog B2	-0.116604	-0.265311	0.101044	0.897496
GPR89A;GPR89B	B7ZAQ6;P0CG08	P0CG08;B7ZAQ6	GPHRA_HUMAN;GPHRB_HUMAN	Golgi pH regulator A	0.579753	4.15504	3.66511	0.0259781
PPP1R3G	B7ZBB8	B7ZBB8	PP13G_HUMAN	Protein phosphatase 1 regulatory subunit 3G	-1.31638	-4.06237	3.55012	0.028502
HNRNPCL1;HNRNPCL3;HNRNPCL4	B7ZW38;O60812;P0DMR1	B7ZW38;O60812;P0DMR1	HNRC1_HUMAN;HNRC3_HUMAN;HNRC4_HUMAN	Heterogeneous nuclear ribonucleoprotein C-like 3	-0.190241	-1.43271	0.792237	0.403229
IGLL5	B9A064	P0CF74;P0DOY2;B9A064;A0M8Q6;P0CG04	IGLL5_HUMAN	Immunoglobulin lambda-like polypeptide 5	0.258018	0.446173	0.181519	0.823998
WASH2P;WASH3P	C4AMC7;Q6VEQ5	C4AMC7;A8K0Z3;Q6VEQ5;Q9NQA3;A8MWX3	WASH2_HUMAN;WASH3_HUMAN	Putative WAS protein family homolog 3	-0.415221	-3.62616	3.01826	0.04575
UMAD1	C9J7I0	C9J7I0	UMAD1_HUMAN	UBAP1-MVB12-associated (UMA)-domain containing protein 1	-0.195572	-1.17216	0.602888	0.505041
TMEM238	C9JI98	C9JI98	TM238_HUMAN	Transmembrane protein 238	0.290941	0.855655	0.399725	0.639059
MCRIP1	C9JLW8	C9JLW8	MCRI1_HUMAN	Mapk-regulated corepressor-interacting protein 1	-0.0266272	-0.188696	0.0698219	0.93213
CFAP99	D6REC4	D6REC4	CFA99_HUMAN	Cilia- and flagella-associated protein 99	-0.478789	-0.857289	0.400697	0.638172
ANKRD65	E5RJM6	E5RJM6	ANR65_HUMAN	Ankyrin repeat domain-containing protein 65	-1.74167	-4.47446	4.06557	0.0173
PROB1	E7EW31	E7EW31	PROB1_HUMAN	Proline-rich basic protein 1	0.631659	0.887136	0.41859	0.625291
NACA	E9PAV3	E9PAV3	NACAM_HUMAN	Nascent polypeptide-associated complex subunit alpha, muscle-specific form	-0.089247	-0.585676	0.250204	0.762482
C11orf98	E9PRG8	E9PRG8	CK098_HUMAN	Uncharacterized protein C11orf98	-0.12104	-0.676466	0.298036	0.718582
STMND1	H3BQB6	H3BQB6	STMD1_HUMAN	Stathmin domain-containing protein 1	-1.39194	-3.1624	2.47512	0.0768151
PIERCE2	H3BRN8	H3BRN8	PIRC2_HUMAN	Piercer of microtubule wall 2 protein	-1.22646	-2.30162	1.55584	0.183316
CROCC2	H7BZ55	H7BZ55	CRCC2_HUMAN	Ciliary rootlet coiled-coil protein 2	-1.44179	-2.28837	1.54282	0.186306
ASDURF	L0R819	L0R819	ASURF_HUMAN	ASNSD1 upstream open reading frame protein	0.136669	0.373076	0.147839	0.854937
DCDC1	M0R2J8	M0R2J8	DCDC1_HUMAN	Doublecortin domain-containing protein 1	-1.17129	-3.17232	2.48644	0.0758875
DNASE2	O00115	O00115	DNS2A_HUMAN	Deoxyribonuclease-2-alpha	0.268991	1.92291	1.19958	0.259332
AGPS	O00116	O00116	ADAS_HUMAN	Alkyldihydroxyacetonephosphate synthase, peroxisomal	0.175335	1.1634	0.59686	0.508329
KIF2A	O00139	O00139	KIF2A_HUMAN	Kinesin-like protein KIF2A	-0.0330587	-0.173216	0.0637175	0.936579
TK2	O00142	O00142	KITM_HUMAN	Thymidine kinase 2, mitochondrial	-0.596122	-4.4888	4.08368	0.0169832
DDX39A	O00148	O00148	DX39A_HUMAN	ATP-dependent RNA helicase DDX39A	0.641726	2.81104	2.08382	0.112917
PDLIM1	O00151	O00151	PDLI1_HUMAN	PDZ and LIM domain protein 1	-1.1157	-3.97616	3.4437	0.0310469
ACOT7	O00154	O00154	BACH_HUMAN	Cytosolic acyl coenzyme A thioester hydrolase	0.462385	2.20102	1.45795	0.20206
MYO1C	O00159	O00159	MYO1C_HUMAN	Unconventional myosin-Ic	-0.0602856	-0.322332	0.125382	0.87652
MYO1F	O00160	O00160	MYO1F_HUMAN	Unconventional myosin-If	0.215128	0.973612	0.471942	0.588316
SNAP23	O00161	O00161	SNP23_HUMAN	Synaptosomal-associated protein 23	-0.208918	-1.98157	1.25252	0.247068
HAX1	O00165	O00165	HAX1_HUMAN	HCLS1-associated protein X-1	0.460844	3.51739	2.88853	0.051494
EYA2	O00167	O00167	EYA2_HUMAN	Eyes absent homolog 2	-0.252827	-0.877896	0.413022	0.629525
FXYD1	O00168	O00168	PLM_HUMAN	Phospholemman	-1.70339	-2.80659	2.079	0.113502
AIP	O00170	O00170	AIP_HUMAN	AH receptor-interacting protein	0.0138406	0.120767	0.0435396	0.955904
GTPBP1	O00178	O00178	GTPB1_HUMAN	GTP-binding protein 1	-0.446432	-3.95028	3.41187	0.031644
LGALS9	O00182	O00182	LEG9_HUMAN	Galectin-9	-0.618819	-2.11035	1.37169	0.21995
STXBP3	O00186	O00186	STXB3_HUMAN	Syntaxin-binding protein 3	-0.23029	-2.64225	1.90328	0.131565
AP4M1	O00189	O00189	AP4M1_HUMAN	AP-4 complex subunit mu-1	0.0994788	0.791087	0.361968	0.667933
ARVCF	O00192	O00192	ARVC_HUMAN	Splicing regulator ARVCF	0.143585	0.983036	0.477892	0.584402
SMAP	O00193	O00193	SMAP_HUMAN	Small acidic protein	-0.135831	-0.534235	0.224201	0.785181
RAB27B	O00194	O00194	RB27B_HUMAN	Ras-related protein Rab-27B	-1.09708	-3.82694	3.26094	0.03681
AP3B1	O00203	Q13367;O00203	AP3B1_HUMAN	AP-3 complex subunit beta-1	-0.151053	-1.9027	1.18154	0.264365
APBB1	O00213	O00213	APBB1_HUMAN	Amyloid beta precursor protein binding family B member 1	-0.571926	-3.07003	2.37038	0.0854228
LGALS8	O00214	O00214	LEG8_HUMAN	Galectin-8	-0.508781	-1.91101	1.18895	0.262615
NDUFS8	O00217	O00217	NDUS8_HUMAN	NADH dehydrogenase [ubiquinone] iron-sulfur protein 8, mitochondrial	-0.412279	-2.80032	2.0722	0.114042
NFKBIE	O00221	O00221	IKBE_HUMAN	NF-kappa-B inhibitor epsilon	-0.390125	-1.70349	1.00932	0.318247
PSMD11	O00231	O00231	PSD11_HUMAN	26S proteasome non-ATPase regulatory subunit 11	-0.0974421	-0.936371	0.448691	0.603845
PSMD12	O00232	O00232	PSD12_HUMAN	26S proteasome non-ATPase regulatory subunit 12	-0.0498455	-0.491312	0.203108	0.805668
PSMD9	O00233	O00233	PSMD9_HUMAN	26S proteasome non-ATPase regulatory subunit 9	-0.0689843	-0.67566	0.2976	0.718829
ATOX1	O00244	O00244	ATOX1_HUMAN	Copper transport protein ATOX1	0.242597	1.43445	0.793567	0.402787
MEN1	O00255	O00255	MEN1_HUMAN	Menin	-0.027307	-0.177343	0.0653385	0.935368
GET1	O00258	O00258	GET1_HUMAN	Guided entry of tail-anchored proteins factor 1	0.417918	2.40724	1.661	0.164387
PGRMC1	O00264	O00264	PGRC1_HUMAN	Membrane-associated progesterone receptor component 1	-0.248978	-1.60056	0.92443	0.348353
SUPT5H	O00267	O00267	SPT5H_HUMAN	Transcription elongation factor SPT5	0.579071	5.03857	4.78343	0.00983085
TAF4	O00268	O00268	TAF4_HUMAN	Transcription initiation factor TFIID subunit 4	0.0534933	0.409581	0.164462	0.840391
DFFA	O00273	O00273	DFFA_HUMAN	DNA fragmentation factor subunit alpha	0.0269313	0.181212	0.0668625	0.934857
RFXAP	O00287	O00287	RFXAP_HUMAN	Regulatory factor X-associated protein	0.308814	1.68514	0.993977	0.324357
HIP1	O00291	O00291	HIP1_HUMAN	Huntingtin-interacting protein 1	-0.041246	-0.437268	0.177332	0.828761
CLIC1	O00299	O00299	CLIC1_HUMAN	Chloride intracellular channel protein 1	-0.295992	-1.81162	1.10152	0.288305
EIF3F	O00303	O00303	EIF3F_HUMAN	Eukaryotic translation initiation factor 3 subunit F	-0.12938	-1.24643	0.65486	0.474899
WWP2	O00308	O00308	WWP2_HUMAN	NEDD4-like E3 ubiquitin-protein ligase WWP2	-0.305819	-2.55368	1.81068	0.143829
PIK3CD	O00329	O00329	PK3CD_HUMAN	Phosphatidylinositol 4,5-bisphosphate 3-kinase catalytic subunit delta isoform	-0.0990323	-0.537484	0.225819	0.783636
PDHX	O00330	O00330	ODPX_HUMAN	Pyruvate dehydrogenase protein X component, mitochondrial	0.378897	2.15565	1.41455	0.210924
SULT1C2	O00338	O00338	ST1C2_HUMAN	Sulfotransferase 1C2	1.09936	2.2257	1.48175	0.197381
MATN2	O00339	O00339	MATN2_HUMAN	Matrilin-2	-0.0686466	-0.204679	0.0761966	0.924735
QSOX1	O00391	O00391	QSOX1_HUMAN	Sulfhydryl oxidase 1	-0.278224	-1.25311	0.659608	0.472003
DCTN6	O00399	O00399	DCTN6_HUMAN	Dynactin subunit 6	0.564527	0.919227	0.438127	0.610884
SLC33A1	O00400	O00400	ACATN_HUMAN	Acetyl-coenzyme A transporter 1	0.324939	2.4764	1.73115	0.15465
WASL	O00401	O00401	WASL_HUMAN	Actin nucleation-promoting factor WASL	-0.0655082	-0.545292	0.229723	0.780264
IPO5	O00410	O00410	IPO5_HUMAN	Importin-5	-0.327785	-2.245	1.50047	0.193938
POLRMT	O00411	O00411	RPOM_HUMAN	DNA-directed RNA polymerase, mitochondrial	0.540394	2.07232	1.33609	0.228217
EEF2K	O00418	O00418	EF2K_HUMAN	Eukaryotic elongation factor 2 kinase	-0.176451	-0.733842	0.329543	0.692807
SAP18	O00422	O00422	SAP18_HUMAN	Histone deacetylase complex subunit SAP18	-0.118233	-0.928814	0.444024	0.606232
EML1	O00423	O00423	EMAL1_HUMAN	Echinoderm microtubule-associated protein-like 1	-0.406077	-3.50421	2.87291	0.0523876
IGF2BP3	O00425	O00425	IF2B3_HUMAN	Insulin-like growth factor 2 mRNA-binding protein 3	0.17565	0.178734	0.0658857	0.935186
DNM1L	O00429	O00429	DNM1L_HUMAN	Dynamin-1-like protein	0.717407	6.90438	7.15991	0.00414286
RTCA	O00442	O00442	RTCA_HUMAN	RNA 3'-terminal phosphate cyclase	0.475194	2.65275	1.91435	0.130695
PIK3C2A	O00443	O00443	P3C2A_HUMAN	Phosphatidylinositol 4-phosphate 3-kinase C2 domain-containing subunit alpha	-0.256714	-2.8541	2.1307	0.108456
PIK3R2	O00459	O00459	P85B_HUMAN	Phosphatidylinositol 3-kinase regulatory subunit beta	0.520863	2.62053	1.88044	0.135092
GOLIM4	O00461	O00461	GOLI4_HUMAN	Golgi integral membrane protein 4	0.23906	1.92505	1.2015	0.259151
MANBA	O00462	O00462	MANBA_HUMAN	Beta-mannosidase	-0.0531427	-0.407191	0.163361	0.841031
AGRN	O00468	O00468	AGRIN_HUMAN	Agrin	0.00329272	0.00926519	0.00319802	0.996151
PLOD2	O00469	O00469	PLOD2_HUMAN	Procollagen-lysine,2-oxoglutarate 5-dioxygenase 2	-0.0250255	-0.104573	0.037466	0.962341
MEIS1	O00470	O00470;O14770	MEIS1_HUMAN	Homeobox protein Meis1	0.0977552	0.425283	0.171733	0.833898
EXOC5	O00471	O00471	EXOC5_HUMAN	Exocyst complex component 5	-0.0236876	-0.310953	0.12045	0.880913
BTN3A3	O00478	O00478	BT3A3_HUMAN	Butyrophilin subfamily 3 member A3	0.295228	1.76171	1.05858	0.301791
HMGN4	O00479	O00479;P05204	HMGN4_HUMAN	High mobility group nucleosome-binding domain-containing protein 4	-0.373609	-1.52668	0.865281	0.371331
NDUFA4	O00483	O00483	NDUA4_HUMAN	Cytochrome c oxidase subunit NDUFA4	-0.230153	-0.947505	0.455598	0.598999
PSMD14	O00487	O00487	PSDE_HUMAN	26S proteasome non-ATPase regulatory subunit 14	-0.0826016	-0.593003	0.253972	0.759435
ZNF593	O00488	O00488	ZN593_HUMAN	Zinc finger protein 593	-0.127097	-0.559935	0.237093	0.773585
BIN1	O00499	O00499	BIN1_HUMAN	Myc box-dependent-interacting protein 1	-0.174155	-1.04709	0.519034	0.553526
KPNA3	O00505	O00505	IMA4_HUMAN	Importin subunit alpha-4	-0.238378	-1.04088	0.514992	0.556289
STK25	O00506	O00506	STK25_HUMAN	Serine/threonine-protein kinase 25	0.034415	0.310475	0.120243	0.88102
BCL9	O00512	O00512	BCL9_HUMAN	B-cell CLL/lymphoma 9 protein	0.179087	1.41631	0.779747	0.409257
LAD1	O00515	O00515	LAD1_HUMAN	Ladinin-1	0.0900697	0.50888	0.211675	0.796603
FAAH	O00519	O00519	FAAH1_HUMAN	Fatty-acid amide hydrolase 1	-0.514224	-3.51331	2.88369	0.0517452
KRIT1	O00522	O00522	KRIT1_HUMAN	Krev interaction trapped protein 1	0.323157	1.64815	0.963322	0.334633
CHL1	O00533	O00533	NCHL1_HUMAN	Neural cell adhesion molecule L1-like protein	-0.683367	-1.68122	0.990706	0.325309
VWA5A	O00534	O00534	VMA5A_HUMAN	von Willebrand factor A domain-containing protein 5A	-0.923034	-4.76925	4.43948	0.0123491
PES1	O00541	O00541	PESC_HUMAN	Pescadillo homolog	0.490601	2.63403	1.89463	0.132675
EBAG9	O00559	O00559	RCAS1_HUMAN	Receptor-binding cancer antigen expressed on SiSo cells	-0.230572	-1.06354	0.529799	0.546849
SDCBP	O00560	O00560	SDCB1_HUMAN	Syntenin-1	-0.136685	-0.800776	0.367554	0.663185
PITPNM1	O00562	O00562	PITM1_HUMAN	Membrane-associated phosphatidylinositol transfer protein 1	-0.639666	-1.76425	1.06075	0.301038
MPHOSPH10	O00566	O00566	MPP10_HUMAN	U3 small nucleolar ribonucleoprotein protein MPP10	0.129338	0.918303	0.43756	0.611235
NOP56	O00567	O00567	NOP56_HUMAN	Nucleolar protein 56	0.219195	0.80351	0.369135	0.661921
DDX3X	O00571	O15523;O00571	DDX3X_HUMAN	ATP-dependent RNA helicase DDX3X	-0.0704731	-0.643189	0.280217	0.734741
RNASET2	O00584	O00584	RNT2_HUMAN	Ribonuclease T2	-0.133686	-0.54181	0.22798	0.78166
PODXL	O00592	O00592	PODXL_HUMAN	Podocalyxin	0.152884	0.41869	0.168671	0.836672
PIR	O00625	O00625	PIR_HUMAN	Pirin	-0.530661	-1.85455	1.13898	0.277192
KPNA4	O00629	O00629	IMA3_HUMAN	Importin subunit alpha-3	0.05471	0.443436	0.18023	0.825667
TRIM38	O00635	O00635	TRI38_HUMAN	E3 ubiquitin-protein ligase TRIM38	0.272501	2.03802	1.30427	0.23574
NFIB	O00712	O00712	NFIB_HUMAN	Nuclear factor 1 B-type	0.0995699	0.569931	0.242161	0.77028
PPP6C	O00743	O00743	PPP6_HUMAN	Serine/threonine-protein phosphatase 6 catalytic subunit	-0.488612	-2.91096	2.19307	0.102522
CES2	O00748	O00748;P22303;Q5XG92	EST2_HUMAN	Cocaine esterase	-0.176254	-0.806849	0.371069	0.659927
PIK3C2B	O00750	O00750	P3C2B_HUMAN	Phosphatidylinositol 4-phosphate 3-kinase C2 domain-containing subunit beta	0.553356	2.44286	1.69701	0.159137
MAN2B1	O00754	O00754	MA2B1_HUMAN	Lysosomal alpha-mannosidase	0.110227	0.646738	0.282101	0.733557
PDXK	O00764	O00764	PDXK_HUMAN	Pyridoxal kinase	-0.59675	-2.46749	1.72205	0.155488
ARID1A	O14497	O14497	ARI1A_HUMAN	AT-rich interactive domain-containing protein 1A	0.331361	2.92579	2.20943	0.101095
ISLR	O14498	O14498	ISLR_HUMAN	Immunoglobulin superfamily containing leucine-rich repeat protein	0.824292	1.87966	1.1611	0.270299
C2CD2L	O14523	O14523	C2C2L_HUMAN	Phospholipid transfer protein C2CD2L	-0.408792	-1.80673	1.09729	0.28906
NEMP1	O14524	O14524	NEMP1_HUMAN	Nuclear envelope integral membrane protein 1	0.112197	0.447959	0.182362	0.824093
TXNDC9	O14530	O14530	TXND9_HUMAN	Thioredoxin domain-containing protein 9	0.324345	2.22018	1.47642	0.198208
DPYSL4	O14531	O14531	DPYL4_HUMAN	Dihydropyrimidinase-related protein 4	-0.149851	-0.192947	0.0715103	0.93108
TRAFD1	O14545	O14545	TRAD1_HUMAN	TRAF-type zinc finger domain-containing protein 1	0.038041	0.378819	0.150428	0.852655
COX7A2L	O14548	O14548	COX7R_HUMAN	Cytochrome c oxidase subunit 7A-related protein, mitochondrial	0.59159	2.66843	1.93094	0.128768
HSPB6	O14558	O14558	HSPB6_HUMAN	Heat shock protein beta-6	0.448155	0.844676	0.393217	0.64431
NDUFAB1	O14561	O14561	ACPM_HUMAN	Acyl carrier protein, mitochondrial	-0.0581953	-0.452424	0.184473	0.822734
UBFD1	O14562	O14562	UBFD1_HUMAN	Ubiquitin domain-containing protein UBFD1	-0.0406135	-0.251523	0.0953007	0.904212
CIT	O14578	O14578	CTRO_HUMAN	Citron Rho-interacting kinase	0.555397	0.938592	0.450066	0.602862
COPE	O14579	O14579	COPE_HUMAN	Coatomer subunit epsilon	0.0722714	0.523595	0.218921	0.789558
RFXANK	O14593	O14593	RFXK_HUMAN	DNA-binding protein RFXANK	0.253895	0.754432	0.341092	0.684229
AP3D1	O14617	O14617	AP3D1_HUMAN	AP-3 complex subunit delta-1	-0.145849	-2.45161	1.70589	0.15761
CCS	O14618	O14618	CCS_HUMAN	Copper chaperone for superoxide dismutase	-0.145777	-0.611571	0.263594	0.750109
ABLIM1	O14639	O14639	ABLM1_HUMAN	Actin-binding LIM protein 1	-0.671861	-2.85645	2.13326	0.108074
DVL1	O14640	P54792;O14640	DVL1_HUMAN	Segment polarity protein dishevelled homolog DVL-1	-0.450504	-3.67866	3.08133	0.0433547
DVL2	O14641	O14641	DVL2_HUMAN	Segment polarity protein dishevelled homolog DVL-2	-0.262347	-1.4866	0.833826	0.385165
DNALI1	O14645	O14645	IDLC_HUMAN	Axonemal dynein light intermediate polypeptide 1	-1.51205	-3.04802	2.34561	0.0876397
CHD2	O14647	Q8TD26;Q9HCK8;Q3L8U1;O14647;Q9P2D1;O14646	CHD2_HUMAN	Chromodomain-helicase-DNA-binding protein 2	0.149402	1.82053	1.10926	0.286026
GOSR2	O14653	O14653	GOSR2_HUMAN	Golgi SNAP receptor complex member 2	-0.220798	-1.25639	0.661949	0.470643
TOR1A	O14656	O14656	TOR1A_HUMAN	Torsin-1A	-0.439618	-3.42414	2.77839	0.0572232
TOR1B	O14657	O14657	TOR1B_HUMAN	Torsin-1B	-0.481882	-1.71267	1.01702	0.314953
STX16	O14662	O14662	STX16_HUMAN	Syntaxin-16	-0.0782185	-0.598324	0.256719	0.75643
ADAM10	O14672	O14672	ADA10_HUMAN	Disintegrin and metalloproteinase domain-containing protein 10	-0.613293	-4.51801	4.12059	0.0167262
ABCD4	O14678	O14678	ABCD4_HUMAN	Lysosomal cobalamin transporter ABCD4	-1.06905	-5.10501	4.86851	0.00936216
EI24	O14681	O14681	EI24_HUMAN	Etoposide-induced protein 2.4 homolog	0.100026	0.667199	0.29304	0.723414
TP53I11	O14683	O14683	P5I11_HUMAN	Tumor protein p53-inducible protein 11	-0.520071	-1.36516	0.741271	0.428763
PTGES	O14684	O14684	PTGES_HUMAN	Prostaglandin E synthase	-1.16889	-1.72607	1.02832	0.311457
KMT2D	O14686	O14686	KMT2D_HUMAN	Histone-lysine N-methyltransferase 2D	0.219602	1.0123	0.496537	0.570356
APAF1	O14727	O14727	APAF_HUMAN	Apoptotic protease-activating factor 1	-0.214975	-2.39129	1.64497	0.167739
IMPA2	O14732	O14732	IMPA2_HUMAN	Inositol monophosphatase 2	0.805699	1.93467	1.21012	0.257813
MAP2K7	O14733	O14733	MP2K7_HUMAN	Dual specificity mitogen-activated protein kinase kinase 7	-0.095409	-0.823535	0.380786	0.653062
ACOT8	O14734	O14734	ACOT8_HUMAN	Acyl-coenzyme A thioesterase 8	0.390907	2.59896	1.85783	0.1373
CDIPT	O14735	O14735	CDIPT_HUMAN	CDP-diacylglycerol--inositol 3-phosphatidyltransferase	-0.370628	-1.9011	1.18012	0.264829
PDCD5	O14737	O14737	PDCD5_HUMAN	Programmed cell death protein 5	0.625008	3.18311	2.49878	0.0748336
PRMT5	O14744	O14744	ANM5_HUMAN	Protein arginine N-methyltransferase 5	-0.332112	-2.19766	1.45472	0.202758
NHERF1	O14745	O14745	NHRF1_HUMAN	Na(+)/H(+) exchange regulatory cofactor NHE-RF1	-0.671409	-1.94697	1.22119	0.255392
FPGT	O14772	O14772	FPGT_HUMAN	Fucose-1-phosphate guanylyltransferase	-0.28894	-2.00771	1.27638	0.241273
TPP1	O14773	O14773	TPP1_HUMAN	Tripeptidyl-peptidase 1	-0.730239	-2.7299	1.99638	0.120667
TCERG1	O14776	O14776	TCRG1_HUMAN	Transcription elongation regulator 1	0.0735334	0.828966	0.383966	0.651476
NRP1	O14786	O14786	NRP1_HUMAN	Neuropilin-1	-0.848733	-2.989	2.27955	0.0946997
TNPO2	O14787	O14787	TNPO2_HUMAN	Transportin-2	-0.20863	-1.55528	0.888002	0.362385
APOL1	O14791	O14791	APOL1_HUMAN	Apolipoprotein L1	0.239572	0.662281	0.290399	0.72514
UNC13B	O14795	O14795	UN13B_HUMAN	Protein unc-13 homolog B	-0.168567	-1.42575	0.786927	0.405663
POLR3A	O14802	O14802	RPC1_HUMAN	DNA-directed RNA polymerase III subunit RPC1	0.0806758	0.620271	0.268138	0.745983
PSMA7	O14818	O14818	PSA7_HUMAN	Proteasome subunit alpha type-7	-0.22962	-1.75753	1.05502	0.30294
SCAMP3	O14828	O14828	SCAM3_HUMAN	Secretory carrier-associated membrane protein 3	0.411574	2.9649	2.25274	0.0970172
OPLAH	O14841	O14841	OPLA_HUMAN	5-oxoprolinase	0.208667	0.996704	0.486568	0.57736
BCKDK	O14874	O14874	BCKD_HUMAN	[3-methyl-2-oxobutanoate dehydrogenase [lipoamide]] kinase, mitochondrial	-0.106575	-0.929398	0.444383	0.606031
IFIT3	O14879	O14879	IFIT3_HUMAN	Interferon-induced protein with tetratricopeptide repeats 3	0.0180024	0.0989498	0.0353743	0.963774
MGST3	O14880	O14880	MGST3_HUMAN	Glutathione S-transferase 3, mitochondrial	0.209546	0.94323	0.452942	0.600515
GEMIN2	O14893	O14893	GEMI2_HUMAN	Gem-associated protein 2	0.129255	1.06871	0.533196	0.544502
IRF6	O14896	O14896	IRF6_HUMAN	Interferon regulatory factor 6	-0.38893	-2.84393	2.1196	0.109528
TAX1BP3	O14907	O14907	TX1B3_HUMAN	Tax1-binding protein 3	-0.494811	-1.68609	0.994769	0.324031
GIPC1	O14908	Q8TF64;O14908	GIPC1_HUMAN	PDZ domain-containing protein GIPC1	0.424057	3.85142	3.29079	0.0355096
IKBKB	O14920	O14920	IKKB_HUMAN	Inhibitor of nuclear factor kappa-B kinase subunit beta	-0.483544	-4.42724	4.00602	0.0179048
RGS12	O14924	O14924	RGS12_HUMAN	Regulator of G-protein signaling 12	-0.134475	-0.92765	0.443306	0.606748
TIMM23	O14925	O14925;Q5SRD1	TIM23_HUMAN	Mitochondrial import inner membrane translocase subunit Tim23	0.343106	2.60843	1.86774	0.136263
HAT1	O14929	O14929	HAT1_HUMAN	Histone acetyltransferase type B catalytic subunit	0.723413	2.85	2.12622	0.10894
UBE2L6	O14933	O14933	UB2L6_HUMAN	Ubiquitin/ISG15-conjugating enzyme E2 L6	0.190395	1.44045	0.798165	0.400505
CASK	O14936	O14936	CSKP_HUMAN	Peripheral plasma membrane protein CASK	-0.598642	-5.63527	5.54864	0.00717526
PLD2	O14939	O14939	PLD2_HUMAN	Phospholipase D2	-0.379955	-2.02866	1.29563	0.237364
UQCRQ	O14949	O14949	QCR8_HUMAN	Cytochrome b-c1 complex subunit 8	-0.0442182	-0.207685	0.0774035	0.923537
MYL12A;MYL12B	O14950;P19105	P19105;O14950	ML12A_HUMAN;ML12B_HUMAN	Myosin regulatory light chain 12B	-0.26893	-2.08849	1.35118	0.225025
HGS	O14964	O14964	HGS_HUMAN	Hepatocyte growth factor-regulated tyrosine kinase substrate	-0.309172	-3.54629	2.92288	0.0499012
RAB29	O14966	O14966	RAB7L_HUMAN	Ras-related protein Rab-7L1	0.198366	0.911117	0.43316	0.614616
CLGN	O14967	O14967	CLGN_HUMAN	Calmegin	-0.466375	-1.13814	0.579617	0.518326
VPS26C	O14972	O14972	VP26C_HUMAN	Vacuolar protein sorting-associated protein 26C	-0.0939916	-0.600762	0.25798	0.755361
PPP1R12A	O14974	O14974	MYPT1_HUMAN	Protein phosphatase 1 regulatory subunit 12A	0.1434	1.52013	0.860114	0.373728
SLC27A2	O14975	O14975	S27A2_HUMAN	Long-chain fatty acid transport protein 2	-1.02525	-3.51797	2.88922	0.0514982
GAK	O14976	O14976	GAK_HUMAN	Cyclin-G-associated kinase	0.127495	1.16053	0.594892	0.509754
HNRNPDL	O14979	O14979	HNRDL_HUMAN	Heterogeneous nuclear ribonucleoprotein D-like	-0.166128	-0.992835	0.484106	0.579361
XPO1	O14980	O14980	XPO1_HUMAN	Exportin-1	0.202759	2.11776	1.37866	0.218363
BTAF1	O14981	O14981	BTAF1_HUMAN	TATA-binding protein-associated factor 172	0.0622113	0.619247	0.267602	0.746188
ZNF609	O15014	O15014	ZN609_HUMAN	Zinc finger protein 609	0.139679	0.785525	0.358774	0.670543
SPTBN2	O15020	O15020	SPTN2_HUMAN	Spectrin beta chain, non-erythrocytic 2	-0.015956	-0.134173	0.0486232	0.951328
MAST4	O15021	O15021	MAST4_HUMAN	Microtubule-associated serine/threonine-protein kinase 4	-0.532675	-6.24413	6.32684	0.00518519
SEC16A	O15027	O15027	SC16A_HUMAN	Protein transport protein Sec16A	-0.295748	-2.25179	1.50707	0.192987
PLXNB2	O15031	O15031	PLXB2_HUMAN	Plexin-B2	-0.304685	-4.12865	3.6323	0.0267006
AREL1	O15033	O15033	AREL1_HUMAN	Apoptosis-resistant E3 ubiquitin protein ligase 1	0.346279	2.16063	1.41928	0.209788
KHNYN	O15037	O15037	KHNYN_HUMAN	Protein KHNYN	0.00203739	0.0197108	0.00683157	0.992864
TECPR2	O15040	O15040	TCPR2_HUMAN	Tectonin beta-propeller repeat-containing protein 2	-0.22169	-1.82476	1.11294	0.28471
U2SURP	O15042	O15042	SR140_HUMAN	U2 snRNP-associated SURP motif-containing protein	0.275118	2.93372	2.2182	0.100143
SETD1A	O15047	O15047	SET1A_HUMAN	Histone-lysine N-methyltransferase SETD1A	-0.0330378	-0.242375	0.0915206	0.908736
TRANK1	O15050	O15050	TRNK1_HUMAN	TPR and ankyrin repeat-containing protein 1	0.265745	0.645359	0.281368	0.73404
SYNJ2	O15056	O15056	SYNJ2_HUMAN	Synaptojanin-2	-0.39793	-1.70597	1.0114	0.317202
SYNM	O15061	O15061	SYNEM_HUMAN	Synemin	0.0948935	0.187026	0.0691601	0.932636
KIF3B	O15066	O15066	KIF3B_HUMAN	Kinesin-like protein KIF3B	0.106665	0.863852	0.404608	0.635508
PFAS	O15067	O15067	PUR4_HUMAN	Phosphoribosylformylglycinamidine synthase	-0.484685	-2.44029	1.6944	0.159488
MCF2L	O15068	O15068	MCF2L_HUMAN	Guanine nucleotide exchange factor DBS	-0.618703	-2.75198	2.02006	0.118604
DCLK1	O15075	O15075	DCLK1_HUMAN	Serine/threonine-protein kinase DCLK1	-1.31892	-3.30474	2.63892	0.0653374
CEP290	O15078	O15078	CE290_HUMAN	Centrosomal protein of 290 kDa	-0.588337	-2.48198	1.73685	0.154061
ANKRD28	O15084	Q8N8A2;O15084	ANR28_HUMAN	Serine/threonine-protein phosphatase 6 regulatory ankyrin repeat subunit A	-0.0587616	-0.686038	0.303224	0.715031
ARHGEF11	O15085	O15085	ARHGB_HUMAN	Rho guanine nucleotide exchange factor 11	0.263306	3.16213	2.47482	0.0768108
PRORP	O15091	O15091	MRPP3_HUMAN	Mitochondrial ribonuclease P catalytic subunit	0.0689033	0.438544	0.17793	0.828352
CHUK	O15111	O15111	IKKA_HUMAN	Inhibitor of nuclear factor kappa-B kinase subunit alpha	-0.273553	-1.36472	0.740941	0.428826
LSM1	O15116	O15116	LSM1_HUMAN	U6 snRNA-associated Sm-like protein LSm1	-0.152633	-1.04818	0.519743	0.553294
NPC1	O15118	O15118	NPC1_HUMAN	NPC intracellular cholesterol transporter 1	-0.108046	-0.867676	0.406894	0.63352
AGPAT2	O15120	O15120	PLCB_HUMAN	1-acyl-sn-glycerol-3-phosphate acyltransferase beta	-0.55975	-1.91303	1.19075	0.262282
DEGS1	O15121	O15121	DEGS1_HUMAN	Sphingolipid delta(4)-desaturase DES1	-0.171436	-0.90897	0.431848	0.615713
SCAMP1	O15126	O15126	SCAM1_HUMAN	Secretory carrier-associated membrane protein 1	-0.162511	-1.01454	0.497976	0.569585
SCAMP2	O15127	O15127	SCAM2_HUMAN	Secretory carrier-associated membrane protein 2	-0.287171	-1.52554	0.864385	0.37166
ARPC1B	O15143	O15143	ARC1B_HUMAN	Actin-related protein 2/3 complex subunit 1B	-0.171	-1.03558	0.511552	0.558737
ARPC2	O15144	O15144	ARPC2_HUMAN	Actin-related protein 2/3 complex subunit 2	-0.314562	-2.72941	1.99586	0.120717
ARPC3	O15145	O15145	ARPC3_HUMAN	Actin-related protein 2/3 complex subunit 3	-0.350157	-2.38444	1.6381	0.169232
BET1	O15155	O15155	BET1_HUMAN	BET1 homolog	-0.0338125	-0.177757	0.0655013	0.935289
POLR1C	O15160	O15160	RPAC1_HUMAN	DNA-directed RNA polymerases I and III subunit RPAC1	0.0520603	0.464386	0.190157	0.816762
TRIM24	O15164	O15164	TIF1A_HUMAN	Transcription intermediary factor 1-alpha	0.364672	2.73227	1.99892	0.120609
PGRMC2	O15173	O15173	PGRC2_HUMAN	Membrane-associated progesterone receptor component 2	-0.67748	-5.92815	5.92377	0.00569231
CETN3	O15182	O15182	CETN3_HUMAN	Centrin-3	-0.776061	-2.67034	1.93297	0.128566
VILL	O15195	O15195	VILL_HUMAN	Villin-like protein	-0.257486	-0.665058	0.29189	0.72424
EPHB6	O15197	O15197	EPHB6_HUMAN	Ephrin type-B receptor 6	0.859364	3.56525	2.94546	0.0487469
RGL2	O15211	O15211	RGL2_HUMAN	Ral guanine nucleotide dissociation stimulator-like 2	0.173103	1.61345	0.934902	0.343484
PFDN6	O15212	O15212	PFD6_HUMAN	Prefoldin subunit 6	0.329291	2.96367	2.25138	0.0970523
WDR46	O15213	O15213	WDR46_HUMAN	WD repeat-containing protein 46	0.324235	2.00891	1.27748	0.241237
NKRF	O15226	O15226	NKRF_HUMAN	NF-kappa-B-repressing factor	0.461773	4.44945	4.03401	0.0178907
GNPAT	O15228	O15228	GNPAT_HUMAN	Dihydroxyacetone phosphate acyltransferase	0.11653	1.05158	0.521968	0.551622
LAMA5	O15230	O15230	LAMA5_HUMAN	Laminin subunit alpha-5	0.261357	0.809488	0.3726	0.658759
ZNF185	O15231	O15231	ZN185_HUMAN	Zinc finger protein 185	-0.561058	-2.7791	2.04926	0.116184
CASC3	O15234	O15234	CASC3_HUMAN	Protein CASC3	0.33947	1.72487	1.0273	0.311441
MRPS12	O15235	O15235	RT12_HUMAN	Small ribosomal subunit protein uS12m	0.574256	3.38461	2.73202	0.0603526
NDUFA1	O15239	O15239	NDUA1_HUMAN	NADH dehydrogenase [ubiquinone] 1 alpha subcomplex subunit 1	-0.102256	-0.458562	0.187384	0.819178
ACOX3	O15254	O15254	ACOX3_HUMAN	Peroxisomal acyl-coenzyme A oxidase 3	0.031111	0.154052	0.0562549	0.94432
RER1	O15258	O15258	RER1_HUMAN	Protein RER1	0.111861	0.573921	0.244192	0.768471
NPHP1	O15259	O15259	NPHP1_HUMAN	Nephrocystin-1	-0.860021	-2.06506	1.32932	0.229827
SURF4	O15260	O15260	SURF4_HUMAN	Surfeit locus protein 4	-0.531133	-3.19804	2.51588	0.0733961
MAPK13	O15264	O15264	MK13_HUMAN	Mitogen-activated protein kinase 13	-0.517108	-2.49161	1.7467	0.153015
SPTLC1	O15269	O15269	SPTC1_HUMAN	Serine palmitoyltransferase 1	-0.29843	-3.06531	2.36506	0.0857314
SPTLC2	O15270	O15270	SPTC2_HUMAN	Serine palmitoyltransferase 2	-0.0102835	-0.0900826	0.0320936	0.966786
OGT	O15294	O15294	OGT1_HUMAN	UDP-N-acetylglucosamine--peptide N-acetylglucosaminyltransferase 110 kDa subunit	0.0678841	0.892647	0.421923	0.623257
ALOX15B	O15296	O15296	LX15B_HUMAN	Polyunsaturated fatty acid lipoxygenase ALOX15B	-1.27991	-2.89459	2.17505	0.103733
PMM2	O15305	O15305	PMM2_HUMAN	Phosphomannomutase 2	-0.0833294	-0.465771	0.190818	0.816398
TM9SF1	O15321	O15321	TM9S1_HUMAN	Transmembrane 9 superfamily member 1	-0.669039	-3.07324	2.374	0.085285
MID1	O15344	O15344	TRI18_HUMAN	E3 ubiquitin-protein ligase Midline-1	0.338505	1.74949	1.04816	0.304801
HMGB3	O15347	O15347	HMGB3_HUMAN	High mobility group protein B3	-0.36694	-1.61559	0.93665	0.342575
PPM1G	O15355	O15355	PPM1G_HUMAN	Protein phosphatase 1G	0.505896	3.86365	3.30573	0.0350194
INPPL1	O15357	O15357	SHIP2_HUMAN	Phosphatidylinositol 3,4,5-trisphosphate 5-phosphatase 2	0.373182	4.98208	4.71115	0.0103774
EIF3D	O15371	O15371	EIF3D_HUMAN	Eukaryotic translation initiation factor 3 subunit D	-0.185811	-1.54733	0.881661	0.364366
EIF3H	O15372	O15372	EIF3H_HUMAN	Eukaryotic translation initiation factor 3 subunit H	-0.0155282	-0.195751	0.0726268	0.92977
HDAC3	O15379	O15379	HDAC3_HUMAN	Histone deacetylase 3	-0.108701	-0.888362	0.41933	0.625081
NVL	O15381	O15381	NVL_HUMAN	Nuclear valosin-containing protein-like	0.35323	3.33091	2.66933	0.063686
BCAT2	O15382	O15382	BCAT2_HUMAN	Branched-chain-amino-acid aminotransferase, mitochondrial	0.399604	2.2395	1.49512	0.195128
YY2	O15391	O15391	TYY2_HUMAN	Transcription factor YY2	-0.984115	-1.75219	1.05047	0.303978
IPO8	O15397	O15397	IPO8_HUMAN	Importin-8	0.714998	5.18305	4.96851	0.00900585
STX7	O15400	O15400	STX7_HUMAN	Syntaxin-7	-0.0836953	-0.607046	0.26124	0.753118
TNRC18	O15417	O15417	TNC18_HUMAN	Trinucleotide repeat-containing gene 18 protein	-0.538765	-2.11999	1.38077	0.217837
SLC16A3	O15427	O15427	MOT4_HUMAN	Monocarboxylate transporter 4	0.190077	0.686779	0.303626	0.714657
ABCC4	O15439	O15439	MRP4_HUMAN	ATP-binding cassette sub-family C member 4	-0.593784	-1.96708	1.23936	0.250367
POLR1G	O15446	O15446	RPA34_HUMAN	DNA-directed RNA polymerase I subunit RPA34	-0.0492212	-0.263555	0.10031	0.898505
TLR3	O15455	O15455	TLR3_HUMAN	Toll-like receptor 3	-0.432445	-2.38886	1.64253	0.168308
P4HA2	O15460	O15460	P4HA2_HUMAN	Prolyl 4-hydroxylase subunit alpha-2	0.360927	1.0501	0.520996	0.552481
CAPN5	O15484	O15484	CAN5_HUMAN	Calpain-5	-0.455232	-1.48702	0.834155	0.385246
GYG2	O15488	O15488	GLYG2_HUMAN	Glycogenin-2	-0.846547	-2.84566	2.12148	0.109415
YKT6	O15498	O15498	YKT6_HUMAN	Synaptobrevin homolog YKT6	0.696083	6.83384	7.07163	0.003875
NUP42	O15504	O15504	NUP42_HUMAN	Nucleoporin NUP42	0.0509811	0.288786	0.11095	0.890463
ARPC5	O15511	O15511	ARPC5_HUMAN	Actin-related protein 2/3 complex subunit 5	-0.0355522	-0.242979	0.0917695	0.90841
POLR2D	O15514	O15514	RPB4_HUMAN	DNA-directed RNA polymerase II subunit RPB4	0.134315	1.43124	0.791114	0.4039
PDPK1	O15530	O15530	PDPK1_HUMAN	3-phosphoinositide-dependent protein kinase 1	-0.402287	-3.46257	2.82366	0.0551442
TAPBP	O15533	O15533	TPSN_HUMAN	Tapasin	-0.0436771	-0.102977	0.0368715	0.962408
KDM6A	O15550	O14607;O15550	KDM6A_HUMAN	Lysine-specific demethylase 6A	0.00975103	0.0792613	0.0281198	0.970067
CLDN3	O15551	P56747;O14493;O15551;O95484	CLD3_HUMAN	Claudin-3	0.32333	1.59949	0.923562	0.348855
DHX15	O43143	O43143	DHX15_HUMAN	ATP-dependent RNA helicase DHX15	0.0566023	0.495732	0.205255	0.80367
RNMT	O43148	O43148	MCES_HUMAN	mRNA cap guanine-N7 methyltransferase	0.182098	1.75719	1.05472	0.303011
ZZEF1	O43149	O43149	ZZEF1_HUMAN	Zinc finger ZZ-type and EF-hand domain-containing protein 1	-0.263358	-2.84332	2.11893	0.10955
ASAP2	O43150	O43150	ASAP2_HUMAN	Arf-GAP with SH3 domain, ANK repeat and PH domain-containing protein 2	0.0839438	0.40495	0.162331	0.842099
TTI1	O43156	O43156	TTI1_HUMAN	TELO2-interacting protein 1 homolog	0.488461	4.37375	3.93869	0.0194796
PLXNB1	O43157	O43157	PLXB1_HUMAN	Plexin-B1	-0.245508	-3.42885	2.78393	0.0571024
RRP8	O43159	O43159	RRP8_HUMAN	Ribosomal RNA-processing protein 8	-0.322864	-1.7602	1.05729	0.30219
PJA2	O43164	O43164	PJA2_HUMAN	E3 ubiquitin-protein ligase Praja-2	-0.540983	-3.63508	3.02896	0.0454785
SIPA1L1	O43166	O43166	SI1L1_HUMAN	Signal-induced proliferation-associated 1-like protein 1	-0.0770573	-0.763593	0.346272	0.679986
CYB5B	O43169	O43169	CYB5B_HUMAN	Cytochrome b5 type B	-0.688429	-4.65582	4.29522	0.0141169
PRPF4	O43172	O43172	PRP4_HUMAN	U4/U6 small nuclear ribonucleoprotein Prp4	0.0477041	0.470465	0.193062	0.815193
PHGDH	O43175	O43175	SERA_HUMAN	D-3-phosphoglycerate dehydrogenase	-0.0124445	-0.030677	0.0106784	0.988928
NDUFS4	O43181	O43181	NDUS4_HUMAN	NADH dehydrogenase [ubiquinone] iron-sulfur protein 4, mitochondrial	-0.622508	-3.52323	2.89547	0.0511197
PHF1	O43189	O43189	PHF1_HUMAN	PHD finger protein 1	-0.239462	-0.828671	0.383793	0.65123
GPR39	O43194	O43194	GPR39_HUMAN	G-protein coupled receptor 39	-0.270124	-1.21057	0.629559	0.48855
SEPTIN4	O43236	O43236	SEPT4_HUMAN	Septin-4	-0.998812	-3.37264	2.71802	0.0613132
DYNC1LI2	O43237	O43237	DC1L2_HUMAN	Cytoplasmic dynein 1 light intermediate chain 2	-0.792414	-6.76471	6.98493	0.00365714
PSMD3	O43242	O43242	PSMD3_HUMAN	26S proteasome non-ATPase regulatory subunit 3	-0.0832454	-0.750805	0.339049	0.685968
RBFOX2	O43251	O43251	RFOX2_HUMAN	RNA binding protein fox-1 homolog 2	0.095289	0.648258	0.282909	0.732681
PAPSS1	O43252	O43252	PAPS1_HUMAN	Bifunctional 3'-phosphoadenosine 5'-phosphosulfate synthase 1	-0.340342	-2.05116	1.31642	0.232913
ZW10	O43264	O43264	ZW10_HUMAN	Centromere/kinetochore protein zw10 homolog	0.270047	3.7444	3.16071	0.0404956
SPINT1	O43278	O43278	SPIT1_HUMAN	Kunitz-type protease inhibitor 1	0.488032	3.14969	2.46063	0.0780179
B4GALT5	O43286	O43286	B4GT5_HUMAN	Beta-1,4-galactosyltransferase 5	-0.342722	-0.809863	0.372818	0.658574
SART1	O43290	O43290	SNUT1_HUMAN	U4/U6.U5 tri-snRNP-associated protein 1	0.139192	1.93454	1.21001	0.257784
SPINT2	O43291	O43291	SPIT2_HUMAN	Kunitz-type protease inhibitor 2	0.5279	2.22861	1.48456	0.197067
GPAA1	O43292	O43292	GPAA1_HUMAN	Glycosylphosphatidylinositol anchor attachment 1 protein	0.117967	0.764099	0.346558	0.679691
DAPK3	O43293	O43293	DAPK3_HUMAN	Death-associated protein kinase 3	0.699255	2.58797	1.84635	0.139247
TGFB1I1	O43294	O43294	TGFI1_HUMAN	Transforming growth factor beta-1-induced transcript 1 protein	-0.180926	-0.358664	0.141384	0.859912
SRGAP3	O43295	O43295	SRGP3_HUMAN	SLIT-ROBO Rho GTPase-activating protein 3	-0.143899	-1.16774	0.599843	0.506871
AP5Z1	O43299	O43299	AP5Z1_HUMAN	AP-5 complex subunit zeta-1	-0.165869	-1.62144	0.941423	0.342009
HSPA12A	O43301	O43301	HS12A_HUMAN	Heat shock 70 kDa protein 12A	-0.878705	-2.33815	1.59194	0.176744
CCP110	O43303	O43303	CP110_HUMAN	Centriolar coiled-coil protein of 110 kDa	-0.528772	-1.72887	1.03068	0.31055
PPIP5K2	O43314	Q6PFW1;O43314	VIP2_HUMAN	Inositol hexakisphosphate and diphosphoinositol-pentakisphosphate kinase 2	0.0426706	0.515484	0.214919	0.793723
MAP3K7	O43318	O43318	M3K7_HUMAN	Mitogen-activated protein kinase kinase kinase 7	-0.0325186	-0.231931	0.0872341	0.914341
EEF1E1	O43324	O43324	MCA3_HUMAN	Eukaryotic translation elongation factor 1 epsilon-1	0.0248704	0.15886	0.0581173	0.942374
MSI1	O43347	O43347	MSI1H_HUMAN	RNA-binding protein Musashi homolog 1	0.806456	2.49856	1.75383	0.152009
RIPK2	O43353	O43353	RIPK2_HUMAN	Receptor-interacting serine/threonine-protein kinase 2	0.185322	0.424491	0.171364	0.83415
HNRNPR	O43390	O43390	HNRPR_HUMAN	Heterogeneous nuclear ribonucleoprotein R	-0.199591	-1.2547	0.660741	0.471448
PRPF3	O43395	O43395	PRPF3_HUMAN	U4/U6 small nuclear ribonucleoprotein Prp3	0.198658	2.22014	1.47637	0.198131
TXNL1	O43396	O43396	TXNL1_HUMAN	Thioredoxin-like protein 1	-0.0511242	-0.413033	0.166054	0.839486
TPD52L2	O43399	O43399	TPD54_HUMAN	Tumor protein D54	0.164489	0.955623	0.460658	0.596449
EMC8	O43402	O43402	EMC8_HUMAN	ER membrane protein complex subunit 8	0.0762446	0.766305	0.347809	0.679343
ERI3	O43414	O43414	ERI3_HUMAN	ERI1 exoribonuclease 3	-0.0792297	-0.538194	0.226174	0.783206
THAP12	O43422	O43422	P52K_HUMAN	52 kDa repressor of the inhibitor of the protein kinase	0.290903	1.34677	0.727619	0.433828
FIBP	O43427	O43427	FIBP_HUMAN	Acidic fibroblast growth factor intracellular-binding protein	0.0167042	0.201756	0.0750252	0.92665
EIF4G3	O43432	O43432	IF4G3_HUMAN	Eukaryotic translation initiation factor 4 gamma 3	0.198289	1.47283	0.823121	0.389927
PPIH	O43447	O43447	PPIH_HUMAN	Peptidyl-prolyl cis-trans isomerase H	0.428172	2.27844	1.53308	0.188002
HTRA2	O43464	O43464;P83110	HTRA2_HUMAN	Serine protease HTRA2, mitochondrial	-0.239682	-1.83063	1.11805	0.28327
AKR7A2	O43488	O43488	ARK72_HUMAN	Aflatoxin B1 aldehyde reductase member 2	-0.563115	-3.71921	3.13024	0.0413678
PROM1	O43490	O43490	PROM1_HUMAN	Prominin-1	0.0545936	0.100386	0.0359077	0.96321
EPB41L2	O43491	O43491	E41L2_HUMAN	Band 4.1-like protein 2	-1.05659	-2.78332	2.05382	0.115981
TGOLN2	O43493	O43493	TGON2_HUMAN	Trans-Golgi network integral membrane protein 2	-0.17968	-0.837916	0.389227	0.648042
LAMTOR5	O43504	O43504	LTOR5_HUMAN	Ragulator complex protein LAMTOR5	-0.0331517	-0.161224	0.0590356	0.941443
B4GAT1	O43505	O43505	B4GA1_HUMAN	Beta-1,4-glucuronyltransferase 1	-0.359005	-2.69595	1.96016	0.12442
WIPF1	O43516	O43516	WIPF1_HUMAN	WAS/WASL-interacting protein family member 1	0.121939	0.527264	0.220737	0.787738
ATP8B1	O43520	O43520	AT8B1_HUMAN	Phospholipid-transporting ATPase IC	-0.792887	-5.24965	5.05392	0.00857862
BCL2L11	O43521	O43521	B2L11_HUMAN	Bcl-2-like protein 11	1.10917	3.43019	2.78551	0.0572158
FOXO3	O43524	O43524	FOXO3_HUMAN	Forkhead box protein O3	0.0150555	0.142873	0.0519495	0.948712
CHST10	O43529	O43529	CHSTA_HUMAN	Carbohydrate sulfotransferase 10	0.184361	0.720926	0.322364	0.699081
RGS14	O43566	O43566	RGS14_HUMAN	Regulator of G-protein signaling 14	-0.689969	-2.05693	1.32177	0.231641
AKAP10	O43572	O43572	AKA10_HUMAN	A-kinase anchor protein 10, mitochondrial	-0.054341	-0.287183	0.110268	0.890956
DENR	O43583	O43583	DENR_HUMAN	Density-regulated protein	-0.103969	-0.84431	0.393	0.64448
XPOT	O43592	O43592	XPOT_HUMAN	Exportin-T	0.223336	2.55333	1.81032	0.14384
DNPH1	O43598	O43598	DNPH1_HUMAN	2'-deoxynucleoside 5'-phosphate N-hydrolase 1	-0.486298	-1.9164	1.19375	0.261304
SPRY1	O43609	O43609	SPY1_HUMAN	Protein sprouty homolog 1	0.197046	1.03928	0.513956	0.55722
TIMM44	O43615	O43615	TIM44_HUMAN	Mitochondrial import inner membrane translocase subunit TIM44	0.506678	4.76073	4.42862	0.0123597
TRAPPC3	O43617	O43617	TPPC3_HUMAN	Trafficking protein particle complex subunit 3	0.124362	0.97231	0.471122	0.5888
CHMP2A	O43633	O43633	CHM2A_HUMAN	Charged multivesicular body protein 2a	-0.204531	-1.87791	1.15956	0.270392
NCK2	O43639	O43639	NCK2_HUMAN	Cytoplasmic protein NCK2	0.150338	1.38224	0.754039	0.422177
PLRG1	O43660	O43660	PLRG1_HUMAN	Pleiotropic regulator 1	-0.0156275	-0.155863	0.0569555	0.94383
RGS10	O43665	O43665	RGS10_HUMAN	Regulator of G-protein signaling 10	-0.138945	-0.768585	0.349105	0.678266
ZNF207	O43670	O43670	ZN207_HUMAN	BUB3-interacting and GLEBS motif-containing protein ZNF207	-0.0447706	-0.314411	0.121945	0.879738
NDUFB5	O43674	O43674	NDUB5_HUMAN	NADH dehydrogenase [ubiquinone] 1 beta subcomplex subunit 5, mitochondrial	-0.0918879	-0.623622	0.269894	0.744244
NDUFB3	O43676	O43676	NDUB3_HUMAN	NADH dehydrogenase [ubiquinone] 1 beta subcomplex subunit 3	-0.230188	-1.55761	0.889866	0.362086
NDUFA2	O43678	O43678	NDUA2_HUMAN	NADH dehydrogenase [ubiquinone] 1 alpha subcomplex subunit 2	-0.0391725	-0.265386	0.101076	0.897694
GET3	O43681	O43681	GET3_HUMAN	ATPase GET3	0.0403187	0.2769	0.105914	0.89456
BUB3	O43684	O43684	BUB3_HUMAN	Mitotic checkpoint protein BUB3	-0.0397951	-0.281894	0.108025	0.892733
PLPP2	O43688	O43688	PLPP2_HUMAN	Phospholipid phosphatase 2	-1.23173	-2.70446	1.96922	0.123801
ACTN4	O43707	O43707	ACTN4_HUMAN	Alpha-actinin-4	-0.315474	-1.9821	1.25301	0.247121
GSTZ1	O43708	O43708	MAAI_HUMAN	Maleylacetoacetate isomerase	-0.676952	-3.12768	2.4356	0.0796399
BUD23	O43709	O43709	BUD23_HUMAN	Probable 18S rRNA (guanine-N(7))-methyltransferase	0.13204	1.17166	0.602543	0.505253
GATC	O43716	O43716	GATC_HUMAN	Glutamyl-tRNA(Gln) amidotransferase subunit C, mitochondrial	0.397084	2.61496	1.87458	0.135698
HTATSF1	O43719	O43719	HTSF1_HUMAN	HIV Tat-specific factor 1	-0.209144	-1.59399	0.919114	0.350483
KDELR3	O43731	O43731	ERD23_HUMAN	ER lumen protein-retaining receptor 3	0.173306	0.748621	0.33782	0.68657
TRAF3IP2	O43734	O43734	CIKS_HUMAN	E3 ubiquitin ligase TRAF3IP2	-0.717959	-3.42296	2.77701	0.0573735
PRKAB2	O43741	O43741	AAKB2_HUMAN	5'-AMP-activated protein kinase subunit beta-2	-0.126004	-0.952216	0.458533	0.597667
AP1G1	O43747	O43747	AP1G1_HUMAN	AP-1 complex subunit gamma-1	-0.309751	-2.64396	1.90508	0.131422
STX6	O43752	O43752	STX6_HUMAN	Syntaxin-6	0.0110888	0.0969769	0.0346424	0.964052
SYNGR1	O43759	O43759	SNG1_HUMAN	Synaptogyrin-1	0.00896374	0.0266075	0.009247	0.990717
SYNGR2	O43760	O43760	SNG2_HUMAN	Synaptogyrin-2	-0.249522	-1.09105	0.547981	0.535039
SGTA	O43765	O43765	SGTA_HUMAN	Small glutamine-rich tetratricopeptide repeat-containing protein alpha	-0.425395	-2.45897	1.71338	0.156686
ENSA	O43768	O43768;P56211	ENSA_HUMAN	Alpha-endosulfine	-0.244696	-1.46294	0.815469	0.393369
SLC25A20	O43772	O43772	MCAT_HUMAN	Mitochondrial carnitine/acylcarnitine carrier protein	0.487544	1.74937	1.04807	0.304767
NARS1	O43776	O43776	SYNC_HUMAN	Asparagine--tRNA ligase, cytoplasmic	-0.126563	-0.858408	0.401363	0.637781
MYO1B	O43795	O43795	MYO1B_HUMAN	Unconventional myosin-Ib	0.982094	2.07953	1.34281	0.227015
SSNA1	O43805	O43805	SSNA1_HUMAN	Microtubule nucleation factor SSNA1	-0.879107	-2.52726	1.78335	0.14767
SLC25A17	O43808	O43808	PM34_HUMAN	Peroxisomal membrane protein PMP34	-0.0235045	-0.108936	0.039095	0.959972
NUDT21	O43809	O43809	CPSF5_HUMAN	Cleavage and polyadenylation specificity factor subunit 5	-0.227118	-1.55728	0.889603	0.361961
LANCL1	O43813	O43813	LANC1_HUMAN	Glutathione S-transferase LANCL1	0.0363921	0.283629	0.10876	0.891646
STRN	O43815	O43815	STRN_HUMAN	Striatin	0.038934	0.393257	0.15698	0.846621
RRP9	O43818	O43818	U3IP2_HUMAN	U3 small nucleolar RNA-interacting protein 2	0.33502	1.99538	1.26511	0.24439
SCO2	O43819	O43819	SCO2_HUMAN	Protein SCO2 homolog, mitochondrial	-0.0511851	-0.177414	0.0653665	0.935444
CFAP410	O43822	O43822	CF410_HUMAN	Cilia- and flagella-associated protein 410	-0.358292	-1.60779	0.930304	0.345546
AKAP8	O43823	O43823	AKAP8_HUMAN	A-kinase anchor protein 8	0.319351	1.76115	1.0581	0.301959
GTPBP6	O43824	O43824	GTPB6_HUMAN	Putative GTP-binding protein 6	-0.179992	-1.48187	0.830145	0.386846
SLC37A4	O43826	O43826	G6PT1_HUMAN	Glucose-6-phosphate exchanger SLC37A4	-0.430108	-1.93717	1.21237	0.257426
IDH3B	O43837	O43837	IDH3B_HUMAN	Isocitrate dehydrogenase [NAD] subunit beta, mitochondrial	-0.0673335	-0.275488	0.105319	0.894743
NRDC	O43847	O43847	NRDC_HUMAN	Nardilysin	0.0645071	0.466264	0.191054	0.816372
CALU	O43852	O43852	CALU_HUMAN	Calumenin	0.57111	2.67045	1.93308	0.128619
ATP9B	O43861	O43861	ATP9B_HUMAN	Probable phospholipid-transporting ATPase IIB	0.0530807	0.138481	0.0502678	0.949704
AHCYL1	O43865	O43865	SAHH2_HUMAN	S-adenosylhomocysteine hydrolase-like protein 1	-0.197716	-1.69831	1.00497	0.319868
KIF1C	O43896	O43896	KIF1C_HUMAN	Kinesin-like protein KIF1C	0.00150781	0.00600254	0.00206919	0.99815
EXTL3	O43909	O43909	EXTL3_HUMAN	Exostosin-like 3	-0.270965	-1.31444	0.703861	0.446689
ORC5	O43913	O43913	ORC5_HUMAN	Origin recognition complex subunit 5	0.249709	2.01415	1.28229	0.240283
TYROBP	O43914	O43914	TYOBP_HUMAN	TYRO protein tyrosine kinase-binding protein	0.61886	2.38396	1.63762	0.169286
NDUFS5	O43920	O43920	NDUS5_HUMAN	NADH dehydrogenase [ubiquinone] iron-sulfur protein 5	-0.395179	-4.12498	3.62774	0.0268161
PDE6D	O43924	O43924	PDE6D_HUMAN	Retinal rod rhodopsin-sensitive cGMP 3',5'-cyclic phosphodiesterase subunit delta	-0.12623	-0.968634	0.46881	0.590402
PEX1	O43933	O43933	PEX1_HUMAN	Peroxisomal ATPase PEX1	0.107175	0.815011	0.375811	0.656489
RAD21	O60216	O60216	RAD21_HUMAN	Double-strand-break repair protein rad21 homolog	-0.143895	-1.20716	0.627178	0.490219
TIMM8A	O60220	O60220	TIM8A_HUMAN	Mitochondrial import inner membrane translocase subunit Tim8 A	0.171917	1.0732	0.536159	0.542336
KALRN	O60229	O60229	KALRN_HUMAN	Kalirin	-0.294915	-0.991851	0.483481	0.579842
DHX16	O60231	O60231	DHX16_HUMAN	Pre-mRNA-splicing factor ATP-dependent RNA helicase DHX16	0.245345	2.46758	1.72215	0.155548
ZNRD2	O60232	O60232	ZNRD2_HUMAN	Protein ZNRD2	0.0602646	0.373036	0.147821	0.854847
GMFG	O60234	O60234	GMFG_HUMAN	Glia maturation factor gamma	0.149597	0.908764	0.431723	0.615748
BNIP3L	O60238	O60238	BNI3L_HUMAN	BCL2/adenovirus E1B 19 kDa protein-interacting protein 3-like	-0.755125	-1.65661	0.9703	0.33287
HS6ST1	O60243	O60243	H6ST1_HUMAN	Heparan-sulfate 6-O-sulfotransferase 1	0.0638495	0.332396	0.129776	0.872696
MED14	O60244	O60244	MED14_HUMAN	Mediator of RNA polymerase II transcription subunit 14	0.354242	2.97789	2.26718	0.0955419
PCDH7	O60245	O60245	PCDH7_HUMAN	Protocadherin-7	-0.217788	-1.43072	0.790722	0.403998
PRPSAP2	O60256	O60256	KPRB_HUMAN	Phosphoribosyl pyrophosphate synthase-associated protein 2	-0.546865	-3.90401	3.35511	0.0335302
GNG7	O60262	O60262	GBG7_HUMAN	Guanine nucleotide-binding protein G(I)/G(S)/G(O) subunit gamma-7	-1.26477	-5.11542	4.88184	0.00940659
SMARCA5	O60264	O60264;P28370	SMCA5_HUMAN	SWI/SNF-related matrix-associated actin-dependent regulator of chromatin subfamily A member 5	0.18011	1.48217	0.830379	0.386881
GPRIN2	O60269	O60269	GRIN2_HUMAN	G protein-regulated inducer of neurite outgrowth 2	-0.883995	-2.09689	1.35904	0.223502
SPAG9	O60271	O60271	JIP4_HUMAN	C-Jun-amino-terminal kinase-interacting protein 4	-0.195395	-1.96988	1.2419	0.249266
ZNF292	O60281	O60281	ZN292_HUMAN	Zinc finger protein 292	0.0930759	0.64094	0.279024	0.735063
KIF5C	O60282	O60282	KIF5C_HUMAN	Kinesin heavy chain isoform 5C	0.0297361	0.0665689	0.0235003	0.974535
URB1	O60287	O60287	NPA1P_HUMAN	Nucleolar pre-ribosomal-associated protein 1	0.102923	0.52888	0.221539	0.787028
SIPA1L3	O60292	O60292	SI1L3_HUMAN	Signal-induced proliferation-associated 1-like protein 3	0.0112825	0.167135	0.0613383	0.939149
ZFC3H1	O60293	O60293	ZC3H1_HUMAN	Zinc finger C3H1 domain-containing protein	0.629491	2.21922	1.47548	0.198273
LCMT2	O60294	O60294	TYW4_HUMAN	tRNA wybutosine-synthesizing protein 4	0.0804903	0.360754	0.142316	0.859311
LZTS3	O60299	O60299	LZTS3_HUMAN	Leucine zipper putative tumor suppressor 3	0.885382	4.60819	4.23478	0.0147768
KATNIP	O60303	O60303	KATIP_HUMAN	Katanin-interacting protein	-0.834158	-2.25072	1.50602	0.193023
AQR	O60306	O60306	AQR_HUMAN	RNA helicase aquarius	0.310463	2.64445	1.9056	0.13154
MAST3	O60307	O60307	MAST3_HUMAN	Microtubule-associated serine/threonine-protein kinase 3	0.370755	2.06345	1.32783	0.230083
OPA1	O60313	O60313	OPA1_HUMAN	Dynamin-like 120 kDa protein, mitochondrial	0.495699	4.12395	3.62645	0.0266891
MCM3AP	O60318	O60318	GANP_HUMAN	Germinal-center associated nuclear protein	0.00897173	0.124577	0.0449792	0.954776
PIP5K1C	O60331	O60331	PI51C_HUMAN	Phosphatidylinositol 4-phosphate 5-kinase type-1 gamma	-0.168383	-0.664844	0.291775	0.724143
KIF1B	O60333	O60333	KIF1B_HUMAN	Kinesin-like protein KIF1B	0.176226	1.11436	0.56356	0.52586
KDM1A	O60341	O60341	KDM1A_HUMAN	Lysine-specific histone demethylase 1A	0.126841	1.2845	0.682124	0.459334
TBC1D4	O60343	O60343	TBCD4_HUMAN	TBC1 domain family member 4	0.187026	1.18921	0.614676	0.498488
FZD6	O60353	O60353	FZD6_HUMAN	Frizzled-6	-0.768913	-4.05267	3.53811	0.0290397
PPL	O60437	O60437	PEPL_HUMAN	Periplakin	-0.198137	-0.560435	0.237345	0.7733
GSDME	O60443	O60443	GSDME_HUMAN	Gasdermin-E	0.293139	1.15201	0.589066	0.513222
LY75	O60449	O60449	LY75_HUMAN	Lymphocyte antigen 75	0.00631533	0.0320078	0.0111474	0.988869
MAN1A2	O60476	O60476	MA1A2_HUMAN	Mannosyl-oligosaccharide 1,2-alpha-mannosidase IB	-0.0294494	-0.173072	0.0636612	0.936564
MPZL2	O60487	O60487	MPZL2_HUMAN	Myelin protein zero-like protein 2	-0.652416	-3.15657	2.46847	0.0773393
ACSL4	O60488	O60488	ACSL4_HUMAN	Long-chain-fatty-acid--CoA ligase 4	-0.0356653	-0.198828	0.0738545	0.928512
SNX3	O60493	O60493	SNX3_HUMAN	Sorting nexin-3	0.103159	1.14749	0.585981	0.514809
STX10	O60499	O60499	STX10_HUMAN	Syntaxin-10	0.374103	1.72531	1.02767	0.311415
OGA	O60502	O60502	OGA_HUMAN	Protein O-GlcNAcase	0.178936	1.16422	0.597422	0.508209
SORBS3	O60504	O60504	VINEX_HUMAN	Vinexin	-1.04649	-3.04385	2.34093	0.0880791
SYNCRIP	O60506	O60506	HNRPQ_HUMAN	Heterogeneous nuclear ribonucleoprotein Q	0.153522	0.988465	0.481331	0.581406
CDC40	O60508	O60508	PRP17_HUMAN	Pre-mRNA-processing factor 17	0.0171478	0.19388	0.0718816	0.9309
B4GALT4	O60513	O60513	B4GT4_HUMAN	Beta-1,4-galactosyltransferase 4	-0.404587	-1.3521	0.731568	0.431826
RANBP6	O60518	O60518	RNBP6_HUMAN	Ran-binding protein 6	0.0434909	0.102402	0.0366575	0.962585
NEMF	O60524	O60524	NEMF_HUMAN	Ribosome quality control complex subunit NEMF	-0.10651	-1.40001	0.767409	0.416063
GMDS	O60547	O60547	GMDS_HUMAN	GDP-mannose 4,6 dehydratase	-0.363585	-1.54625	0.880807	0.364701
NMT2	O60551	O60551	NMT2_HUMAN	Glycylpeptide N-tetradecanoyltransferase 2	-0.172854	-0.521112	0.217694	0.790794
CCNT1	O60563	O60563	CCNT1_HUMAN	Cyclin-T1	-0.147597	-0.412711	0.165905	0.839494
PLOD3	O60568	O60568	PLOD3_HUMAN	Multifunctional procollagen lysine hydroxylase and glycosyltransferase LH3	1.03883	6.81005	7.04181	0.00375758
EIF4E2	O60573	O60573	IF4E2_HUMAN	Eukaryotic translation initiation factor 4E type 2	0.0395301	0.400457	0.16027	0.843592
TLR5	O60602	O60602	TLR5_HUMAN	Toll-like receptor 5	-0.142849	-0.464563	0.190242	0.816871
TLR2	O60603	O60603	TLR2_HUMAN	Toll-like receptor 2	0.5996	1.68831	0.996618	0.323235
DIAPH1	O60610	O60610	DIAP1_HUMAN	Protein diaphanous homolog 1	-0.078492	-0.934978	0.447829	0.604475
SELENOF	O60613	O60613	SEP15_HUMAN	Selenoprotein F	0.327553	2.50136	1.7567	0.151495
TSPAN1	O60635	O60635	TSN1_HUMAN	Tetraspanin-1	-0.710525	-1.25148	0.658451	0.472614
TSPAN3	O60637	O60637	TSN3_HUMAN	Tetraspanin-3	-0.071232	-0.303392	0.117194	0.884116
EXOC3	O60645	O60645	EXOC3_HUMAN	Exocyst complex component 3	-0.13882	-2.22853	1.48448	0.197005
PDE8A	O60658	O60658	PDE8A_HUMAN	High affinity cAMP-specific and IBMX-insensitive 3',5'-cyclic phosphodiesterase 8A	0.200867	0.923627	0.440829	0.608316
PLIN3	O60664	O60664	PLIN3_HUMAN	Perilipin-3	-0.585813	-3.30709	2.64165	0.0652563
RAD1	O60671	O60671	RAD1_HUMAN	Cell cycle checkpoint protein RAD1	0.748864	1.46337	0.815799	0.393329
PRMT3	O60678	O60678	ANM3_HUMAN	Protein arginine N-methyltransferase 3	0.165305	1.21684	0.633954	0.485946
KPNA6	O60684	O60684	IMA7_HUMAN	Importin subunit alpha-7	-0.0754595	-0.530622	0.222404	0.786286
UGDH	O60701	O60701	UGDH_HUMAN	UDP-glucose 6-dehydrogenase	-0.973268	-3.40802	2.75945	0.0585121
CTNND1	O60716	O60716	CTND1_HUMAN	Catenin delta-1	-0.425003	-3.23008	2.55266	0.0709412
ICMT	O60725	O60725	ICMT_HUMAN	Protein-S-isoprenylcysteine O-methyltransferase	0.146543	0.848453	0.395452	0.641876
PLA2G6	O60733	O60733	PLPL9_HUMAN	85/88 kDa calcium-independent phospholipase A2	0.0846071	0.543051	0.228601	0.780885
EIF1B	O60739	O60739	EIF1B_HUMAN	Eukaryotic translation initiation factor 1b	-0.32195	-1.69102	0.998883	0.322254
SNX2	O60749	Q13596;O60749	SNX2_HUMAN	Sorting nexin-2	-0.119413	-0.82476	0.381502	0.652595
DPM1	O60762	O60762	DPM1_HUMAN	Dolichol-phosphate mannosyltransferase subunit 1	-0.408125	-3.6148	3.00465	0.0465435
USO1	O60763	O60763	USO1_HUMAN	General vesicular transport factor p115	-0.184037	-1.07438	0.536938	0.542107
MRPS14	O60783	O60783	RT14_HUMAN	Small ribosomal subunit protein uS14m	0.331644	1.65137	0.965975	0.333853
TOM1	O60784	O60784	TOM1_HUMAN	Target of Myb1 membrane trafficking protein	-0.49633	-2.28874	1.54317	0.186281
H2BC10;H2BC12;H2BC14;H2BC15;H2BC18;H2BC5;H2BC9	O60814;P58876;P62807;Q5QNW6;Q93079;Q99877;Q99879	Q99879;P57053;Q5QNW6;Q16778;O60814;P62807;P23527;P06899;Q99880;Q99877;P33778;Q93079;Q8N257;Q96A08;P58876	H2B1C_HUMAN;H2B1D_HUMAN;H2B1H_HUMAN;H2B1K_HUMAN;H2B1M_HUMAN;H2B1N_HUMAN;H2B2F_HUMAN	Histone H2B type 1-K	-0.493418	-2.83602	2.11097	0.11052
PFKFB2	O60825	O60825	F262_HUMAN	6-phosphofructo-2-kinase/fructose-2,6-bisphosphatase 2	0.248775	1.62665	0.94568	0.340565
CCDC22	O60826	O60826	CCD22_HUMAN	Coiled-coil domain-containing protein 22	-0.174604	-2.55159	1.80852	0.143803
PQBP1	O60828	O60828	PQBP1_HUMAN	Polyglutamine-binding protein 1	0.431761	1.83594	1.12268	0.281602
TIMM17B	O60830	O60830	TI17B_HUMAN	Mitochondrial import inner membrane translocase subunit Tim17-B	-0.44564	-0.895827	0.423851	0.622197
PRAF2	O60831	O60831	PRAF2_HUMAN	PRA1 family protein 2	0.536124	3.06502	2.36473	0.08572
DKC1	O60832	O60832	DKC1_HUMAN	H/ACA ribonucleoprotein complex subunit DKC1	-0.213779	-1.04235	0.515946	0.555539
EIF5B	O60841	O60841	IF2P_HUMAN	Eukaryotic translation initiation factor 5B	0.63768	6.64645	6.83622	0.00461538
TRIM13	O60858	O60858	TRI13_HUMAN	E3 ubiquitin-protein ligase TRIM13	0.0886204	0.643828	0.280556	0.734491
EDF1	O60869	O60869	EDF1_HUMAN	Endothelial differentiation-related factor 1	-0.258752	-1.78208	1.07603	0.295388
KIN	O60870	O60870	KIN17_HUMAN	DNA/RNA-binding protein KIN17	0.560819	2.59973	1.85864	0.137357
DIAPH2	O60879	O60879	DIAP2_HUMAN	Protein diaphanous homolog 2	-0.341641	-2.768	2.03729	0.117064
DNAJA2	O60884	O60884	DNJA2_HUMAN	DnaJ homolog subfamily A member 2	-0.40428	-3.26971	2.59836	0.0680197
BRD4	O60885	Q15059;O60885	BRD4_HUMAN	Bromodomain-containing protein 4	0.181982	1.17085	0.601982	0.505616
CUTA	O60888	O60888	CUTA_HUMAN	Protein CutA	-0.00449069	-0.0263558	0.00915863	0.990645
OPHN1	O60890	O60890	OPHN1_HUMAN	Oligophrenin-1	-0.318289	-1.06972	0.533866	0.544081
SMPD2	O60906	O60906	NSMA_HUMAN	Sphingomyelin phosphodiesterase 2	-1.03141	-2.22762	1.48361	0.197011
PFDN1	O60925	O60925	PFD1_HUMAN	Prefoldin subunit 1	0.0931709	0.940333	0.451145	0.602008
PPP1R11	O60927	O60927	PP1RB_HUMAN	E3 ubiquitin-protein ligase PPP1R11	0.124578	0.718189	0.320849	0.700104
NBN	O60934	O60934	NBN_HUMAN	Nibrin	0.0663803	0.458196	0.18721	0.819355
NOL3	O60936	O60936	NOL3_HUMAN	Nucleolar protein 3	-0.0586662	-0.293552	0.11298	0.889477
DTNB	O60941	O60941	DTNB_HUMAN	Dystrobrevin beta	-0.112026	-0.80876	0.372177	0.659128
RNGTT	O60942	O60942	MCE1_HUMAN	mRNA-capping enzyme	0.284146	1.61094	0.932862	0.344409
ABCB7	O75027	O75027	ABCB7_HUMAN	Iron-sulfur clusters transporter ABCB7, mitochondrial	0.305566	1.74797	1.04687	0.30497
SRGAP2	O75044	O75044;Q7Z6B7	SRGP2_HUMAN	SLIT-ROBO Rho GTPase-activating protein 2	0.00129853	0.0097918	0.00338049	0.996166
IGSF3	O75054	O75054	IGSF3_HUMAN	Immunoglobulin superfamily member 3	0.555591	1.63974	0.956404	0.336643
SDC3	O75056	O75056	SDC3_HUMAN	Syndecan-3	0.131684	0.48949	0.202225	0.806769
FAM20B	O75063	O75063	XYLK_HUMAN	Glycosaminoglycan xylosylkinase	0.0835822	0.747001	0.336909	0.687122
DENND4B	O75064	O75064	DEN4B_HUMAN	DENN domain-containing protein 4B	0.479882	3.53867	2.91381	0.0502157
EFCAB14	O75071	O75071	EFC14_HUMAN	EF-hand calcium-binding domain-containing protein 14	-0.253758	-0.92989	0.444687	0.606261
WDR1	O75083	O75083	WDR1_HUMAN	WD repeat-containing protein 1	-0.269106	-2.32994	1.58381	0.177704
SLIT3	O75094	O75094	SLIT3_HUMAN	Slit homolog 3 protein	0.501916	1.68361	0.992699	0.324745
ATP9A	O75110	O75110	ATP9A_HUMAN	Probable phospholipid-transporting ATPase IIA	-0.2481	-1.61247	0.934106	0.343893
N4BP1	O75113	O75113	N4BP1_HUMAN	NEDD4-binding protein 1	-0.112785	-0.5628	0.238542	0.772876
ROCK2	O75116	O75116	ROCK2_HUMAN	Rho-associated protein kinase 2	-0.0998336	-1.43607	0.794806	0.402009
CLASP2	O75122	O75122	CLAP2_HUMAN	CLIP-associating protein 2	-0.327793	-3.05572	2.35427	0.0867131
PTCD1	O75127	O75127	PTCD1_HUMAN	Pentatricopeptide repeat-containing protein 1, mitochondrial	0.3695	3.42989	2.78516	0.0571274
COBL	O75128	O75128	COBL_HUMAN	Protein cordon-bleu	-0.415213	-1.85959	1.1434	0.275815
CPNE3	O75131	O75131	CPNE3_HUMAN	Copine-3	-0.389322	-3.93719	3.3958	0.0322138
DEPDC5	O75140	O75140	DEPD5_HUMAN	GATOR complex protein DEPDC5	-0.452881	-4.78931	4.46503	0.0118681
ATG13	O75143	O75143	ATG13_HUMAN	Autophagy-related protein 13	0.0677298	0.474457	0.194976	0.813485
ICOSLG	O75144	O75144	ICOSL_HUMAN	ICOS ligand	-0.877266	-6.19111	6.25936	0.00508475
HIP1R	O75146	O75146	HIP1R_HUMAN	Huntingtin-interacting protein 1-related protein	-0.362311	-2.00468	1.27361	0.241881
OBSL1	O75147	O75147	OBSL1_HUMAN	Obscurin-like protein 1	0.110298	0.833531	0.386646	0.649551
RNF40	O75150	O75150	BRE1B_HUMAN	E3 ubiquitin-protein ligase BRE1B	0.370956	4.04556	3.52932	0.0291316
PHF2	O75151	O75151	PHF2_HUMAN	Lysine-specific demethylase PHF2	-0.487563	-3.82708	3.26112	0.0368616
ZC3H11A	O75152	O75152	ZC11A_HUMAN	Zinc finger CCCH domain-containing protein 11A	0.20143	1.80438	1.09525	0.289656
CLUH	O75153	O75153	CLU_HUMAN	Clustered mitochondria protein homolog	0.0168201	0.138635	0.0503266	0.949844
CAND2	O75155	O75155	CAND2_HUMAN	Cullin-associated NEDD8-dissociated protein 2	-0.19964	-0.814658	0.375606	0.656393
NPHP4	O75161	O75161	NPHP4_HUMAN	Nephrocystin-4	-1.35113	-2.864	2.14151	0.107143
KDM4A	O75164	O75164	KDM4A_HUMAN	Lysine-specific demethylase 4A	0.100124	0.530652	0.222419	0.786388
DNAJC13	O75165	O75165	DJC13_HUMAN	DnaJ homolog subfamily C member 13	0.239997	3.74148	3.15717	0.0405991
PPP6R2	O75170	O75170	PP6R2_HUMAN	Serine/threonine-protein phosphatase 6 regulatory subunit 2	-0.421793	-4.30465	3.85196	0.0214181
CNOT3	O75175	O75175	CNOT3_HUMAN	CCR4-NOT transcription complex subunit 3	0.125913	1.2353	0.646967	0.478362
ANKRD17	O75179	O75179	ANR17_HUMAN	Ankyrin repeat domain-containing protein 17	0.0576674	0.441666	0.179397	0.826675
SIN3B	O75182	O75182	SIN3B_HUMAN	Paired amphipathic helix protein Sin3b	0.37362	2.68738	1.95104	0.125618
DNAJB6	O75190	O75190	DNJB6_HUMAN	DnaJ homolog subfamily B member 6	-0.701395	-1.44033	0.798068	0.400474
XYLB	O75191	O75191	XYLB_HUMAN	Xylulose kinase	0.55205	1.98184	1.25277	0.247044
COQ9	O75208	O75208	COQ9_HUMAN	Ubiquinone biosynthesis protein COQ9, mitochondrial	0.0565788	0.412305	0.165718	0.839425
GGCT	O75223	O75223	GGCT_HUMAN	Gamma-glutamylcyclotransferase	-0.195499	-0.737119	0.331373	0.691713
NDUFS7	O75251	O75251	NDUS7_HUMAN	NADH dehydrogenase [ubiquinone] iron-sulfur protein 7, mitochondrial	-0.420404	-2.35211	1.60581	0.174345
NDUFS2	O75306	O75306	NDUS2_HUMAN	NADH dehydrogenase [ubiquinone] iron-sulfur protein 2, mitochondrial	-0.116677	-0.916221	0.436284	0.611853
CDH16	O75309	O75309	CAD16_HUMAN	Cadherin-16	0.057905	0.135463	0.0491152	0.95098
ZPR1	O75312	O75312	ZPR1_HUMAN	Zinc finger protein ZPR1	0.0821196	0.666885	0.292871	0.723556
USP12	O75317	O75317;P62068	UBP12_HUMAN	Ubiquitin carboxyl-terminal hydrolase 12	-0.071247	-0.272897	0.104228	0.895663
DUSP11	O75319	O75319	DUS11_HUMAN	RNA/RNP complex-1-interacting phosphatase	-0.351058	-2.06844	1.33247	0.229001
NIPSNAP2	O75323	O75323	NIPS2_HUMAN	Protein NipSnap homolog 2	-0.0875342	-0.550853	0.232514	0.778401
CILP	O75339	O75339	CILP1_HUMAN	Cartilage intermediate layer protein 1	0.695881	1.54859	0.88267	0.364372
PDCD6	O75340	O75340	PDCD6_HUMAN	Programmed cell death protein 6	-0.202929	-1.50673	0.849568	0.377794
TBCA	O75347	O75347	TBCA_HUMAN	Tubulin-specific chaperone A	-0.0849087	-0.640409	0.278743	0.735109
ATP6V1G1	O75348	O75348	VATG1_HUMAN	V-type proton ATPase subunit G 1	-0.2721	-1.12215	0.568803	0.522932
VPS4B	O75351	O75351	VPS4B_HUMAN	Vacuolar protein sorting-associated protein 4B	-0.0689729	-0.930849	0.445279	0.606257
MPDU1	O75352	O75352	MPU1_HUMAN	Mannose-P-dolichol utilization defect 1 protein	-0.557087	-3.37072	2.71576	0.0613864
ENTPD5	O75356	O75356	ENTP5_HUMAN	Nucleoside diphosphate phosphatase ENTPD5	-0.417864	-2.43441	1.68845	0.160227
ZNF217	O75362	O75362	ZN217_HUMAN	Zinc finger protein 217	0.130591	1.42016	0.782672	0.407681
MACROH2A1	O75367	O75367	H2AY_HUMAN	Core histone macro-H2A.1	-0.431837	-3.2463	2.57133	0.0694511
SH3BGRL	O75368	O75368	SH3L1_HUMAN	Adapter SH3BGRL	-0.301192	-1.55079	0.884419	0.363572
FLNB	O75369	O75369	FLNB_HUMAN	Filamin-B	-1.00144	-6.45202	6.59066	0.00518182
NCOR1	O75376	O75376;Q9Y618	NCOR1_HUMAN	Nuclear receptor corepressor 1	-0.16801	-1.33717	0.720536	0.438334
NDUFS6	O75380	O75380	NDUS6_HUMAN	NADH dehydrogenase [ubiquinone] iron-sulfur protein 6, mitochondrial	-0.0256621	-0.229633	0.0862953	0.915091
PEX14	O75381	O75381	PEX14_HUMAN	Peroxisomal membrane protein PEX14	0.0154575	0.134298	0.0486709	0.951355
TRIM3	O75382	O75382	TRIM3_HUMAN	Tripartite motif-containing protein 3	-0.485928	-1.85334	1.13792	0.277376
TULP3	O75386	O75386	TULP3_HUMAN	Tubby-related protein 3	0.175075	0.715096	0.31914	0.701587
CS	O75390	O75390	CISY_HUMAN	Citrate synthase, mitochondrial	0.596483	3.89598	3.34526	0.0338236
SPAG7	O75391	O75391	SPAG7_HUMAN	Sperm-associated antigen 7	-0.601006	-4.0141	3.49047	0.0301328
SEC22B	O75396	O75396	SC22B_HUMAN	Vesicle-trafficking protein SEC22b	0.271903	1.64452	0.960331	0.335754
PRPF40A	O75400	O75400	PR40A_HUMAN	Pre-mRNA-processing factor 40 homolog A	0.13962	1.35077	0.730582	0.432363
TACC1	O75410	O75410;O95359	TACC1_HUMAN	Transforming acidic coiled-coil-containing protein 1	-0.811055	-8.14966	8.6816	0.00266667
NME6	O75414	O75414	NDK6_HUMAN	Nucleoside diphosphate kinase 6	-0.105146	-0.359268	0.141654	0.859815
GIGYF1	O75420	O75420	GGYF1_HUMAN	GRB10-interacting GYF protein 1	0.0297561	0.382814	0.152235	0.85151
LRCH4	O75427	O75427	LRCH4_HUMAN	Leucine-rich repeat and calponin homology domain-containing protein 4	-0.185468	-1.91338	1.19106	0.262226
MTX2	O75431	O75431	MTX2_HUMAN	Metaxin-2	0.20162	1.19396	0.617972	0.49645
VPS26A	O75436	O75436	VP26A_HUMAN	Vacuolar protein sorting-associated protein 26A	-0.207522	-1.99587	1.26556	0.244267
NDUFB1	O75438	O75438	NDUB1_HUMAN	NADH dehydrogenase [ubiquinone] 1 beta subcomplex subunit 1	-0.596683	-3.04352	2.34056	0.0880658
PMPCB	O75439	O75439	MPPB_HUMAN	Mitochondrial-processing peptidase subunit beta	0.262931	1.81929	1.10818	0.286341
MED24	O75448	O75448	MED24_HUMAN	Mediator of RNA polymerase II transcription subunit 24	0.339391	2.67526	1.93817	0.127725
KATNA1	O75449	O75449	KTNA1_HUMAN	Katanin p60 ATPase-containing subunit A1	-0.138717	-1.22381	0.638859	0.483283
LGR5	O75473	O75473	LGR5_HUMAN	Leucine-rich repeat-containing G-protein coupled receptor 5	-0.0216024	-0.0917766	0.0327187	0.966309
PSIP1	O75475	O75475	PSIP1_HUMAN	PC4 and SFRS1-interacting protein	-0.162545	-1.06642	0.531689	0.545817
ERLIN1	O75477	O75477	ERLN1_HUMAN	Erlin-1	-0.761935	-4.65004	4.28787	0.0140317
SUPT3H	O75486	O75486	SUPT3_HUMAN	Transcription initiation protein SPT3 homolog	-0.662804	-2.37882	1.63248	0.169944
GPC4	O75487	O75487	GPC4_HUMAN	Glypican-4	1.60485	9.26826	9.97972	0.004
NDUFS3	O75489	O75489	NDUS3_HUMAN	NADH dehydrogenase [ubiquinone] iron-sulfur protein 3, mitochondrial	-0.143487	-1.06612	0.531493	0.545817
SRSF10	O75494	O75494	SRS10_HUMAN	Serine/arginine-rich splicing factor 10	-0.0109615	-0.122895	0.044343	0.955306
CLN5	O75503	O75503	CLN5_HUMAN	Ceroid-lipofuscinosis neuronal protein 5	-0.206478	-0.769703	0.34974	0.677879
HSBP1	O75506	O75506	HSBP1_HUMAN	Heat shock factor-binding protein 1	-1.05925	-2.3937	1.64739	0.167277
ECI2	O75521	O75521	ECI2_HUMAN	Enoyl-CoA delta isomerase 2	-0.357972	-1.80921	1.09944	0.288446
KHDRBS3	O75525	O75525	KHDR3_HUMAN	KH domain-containing, RNA-binding, signal transduction-associated protein 3	0.161058	0.727978	0.326278	0.69594
TADA3	O75528	O75528	TADA3_HUMAN	Transcriptional adapter 3	0.228255	1.48306	0.831068	0.386681
TAF5L	O75529	O75529	TAF5L_HUMAN	TAF5-like RNA polymerase II p300/CBP-associated factor-associated factor 65 kDa subunit 5L	0.197853	1.31863	0.706923	0.445389
EED	O75530	O75530	EED_HUMAN	Polycomb protein EED	0.0452369	0.467128	0.191466	0.81618
BANF1	O75531	O75531	BAF_HUMAN	Barrier-to-autointegration factor	-0.522712	-2.85852	2.13552	0.107826
SF3B1	O75533	O75533	SF3B1_HUMAN	Splicing factor 3B subunit 1	0.1231	1.24208	0.65177	0.476604
CSDE1	O75534	O75534	CSDE1_HUMAN	Cold shock domain-containing protein E1	0.380891	4.24215	3.77373	0.0235222
WBP4	O75554	O75554	WBP4_HUMAN	WW domain-binding protein 4	0.469934	1.39869	0.766406	0.416464
STX11	O75558	O75558	STX11_HUMAN	Syntaxin-11	-0.905504	-1.99103	1.26113	0.245043
SKAP2	O75563	O75563	SKAP2_HUMAN	Src kinase-associated phosphoprotein 2	-0.0822874	-0.750011	0.338602	0.686348
PRKRA	O75569	O75569	PRKRA_HUMAN	Interferon-inducible double-stranded RNA-dependent protein kinase activator A	-0.0686613	-0.371985	0.147348	0.855064
MTRF1	O75570	O75570	RF1M_HUMAN	Peptide chain release factor 1, mitochondrial	0.515981	1.5536	0.886665	0.363018
LRP6	O75581	O75581	LRP6_HUMAN	Low-density lipoprotein receptor-related protein 6	0.654148	2.21478	1.4712	0.199221
RPS6KA5	O75582	O75582	KS6A5_HUMAN	Ribosomal protein S6 kinase alpha-5	-0.409699	-2.06347	1.32785	0.230168
MED6	O75586	O75586	MED6_HUMAN	Mediator of RNA polymerase II transcription subunit 6	0.374718	2.16467	1.42314	0.209165
MYCBP2	O75592	O75592	MYCB2_HUMAN	E3 ubiquitin-protein ligase MYCBP2	0.0388376	0.406693	0.163132	0.841314
SPAG6	O75602	O75602	SPAG6_HUMAN	Sperm-associated antigen 6	-1.10737	-1.24557	0.654244	0.47533
USP2	O75604	O75604	UBP2_HUMAN	Ubiquitin carboxyl-terminal hydrolase 2	-0.666423	-1.49989	0.844209	0.38053
NPM3	O75607	O75607	NPM3_HUMAN	Nucleoplasmin-3	0.803361	3.10217	2.40668	0.0824165
LYPLA1	O75608	O75608	LYPA1_HUMAN	Acyl-protein thioesterase 1	-0.337098	-1.74423	1.04369	0.306187
ERAL1	O75616	O75616	ERAL1_HUMAN	GTPase Era, mitochondrial	0.263048	2.5643	1.8217	0.142527
REM1	O75628	O75628	REM1_HUMAN	GTP-binding protein REM 1	-1.56086	-3.81616	3.24782	0.0372855
SNRNP200	O75643	O75643	U520_HUMAN	U5 small nuclear ribonucleoprotein 200 kDa helicase	0.13867	1.29288	0.688179	0.455693
TRMU	O75648	O75648	MTU1_HUMAN	Mitochondrial tRNA-specific 2-thiouridylase 1	0.0294557	0.142437	0.0517823	0.948915
TIPRL	O75663	O75663	TIPRL_HUMAN	TIP41-like protein	0.113053	1.65482	0.968822	0.333275
OFD1	O75665	O75665	OFD1_HUMAN	Centriole and centriolar satellite protein OFD1	-0.346432	-2.03105	1.29784	0.236605
TOM1L1	O75674	O75674	TM1L1_HUMAN	TOM1-like protein 1	-0.585711	-3.5354	2.90992	0.0502955
RPS6KA4	O75676	O75676	KS6A4_HUMAN	Ribosomal protein S6 kinase alpha-4	-0.319074	-2.78783	2.05869	0.115628
SURF6	O75683	O75683	SURF6_HUMAN	Surfeit locus protein 6	-0.120842	-0.562192	0.238234	0.772871
PPM1B	O75688	O75688	PPM1B_HUMAN	Protein phosphatase 1B	0.284668	3.09929	2.40342	0.0825283
ADAP1	O75689	O75689	ADAP1_HUMAN	Arf-GAP with dual PH domain-containing protein 1	-1.33313	-5.56954	5.46434	0.00746154
UTP20	O75691	O75691	UTP20_HUMAN	Small subunit processome component 20 homolog	0.294247	1.67834	0.988314	0.326212
NUP155	O75694	O75694	NU155_HUMAN	Nuclear pore complex protein Nup155	0.0170045	0.163012	0.0597312	0.940471
RP2	O75695	O75695	XRP2_HUMAN	Protein XRP2	-0.209988	-1.06619	0.531537	0.54587
STK16	O75716	O75716	STK16_HUMAN	Serine/threonine-protein kinase 16	-0.145926	-0.798971	0.366511	0.663932
WDHD1	O75717	O75717	WDHD1_HUMAN	WD repeat and HMG-box DNA-binding protein 1	0.352077	0.903455	0.428486	0.618641
CRTAP	O75718	O75718	CRTAP_HUMAN	Cartilage-associated protein	0.709135	4.02378	3.50241	0.0298161
SLC25A12	O75746	O75746	S2512_HUMAN	Electrogenic aspartate/glutamate antiporter SLC25A12, mitochondrial	1.02078	5.07918	4.83543	0.00940206
TCEA3	O75764	O75764	TCEA3_HUMAN	Transcription elongation factor A protein 3	0.322076	1.26315	0.666779	0.467656
PALM	O75781	O75781	PALM_HUMAN	Paralemmin-1	0.310311	0.68045	0.300192	0.716715
ATP6AP2	O75787	O75787	RENR_HUMAN	Renin receptor	-0.0917244	-1.08144	0.541605	0.538799
GRAP2	O75791	O75791	GRAP2_HUMAN	GRB2-related adapter protein 2	-0.284288	-0.614517	0.26513	0.7492
RNASEH2A	O75792	O75792	RNH2A_HUMAN	Ribonuclease H2 subunit A	-0.23257	-1.15711	0.592548	0.511157
CDC123	O75794	O75794	CD123_HUMAN	Cell division cycle protein 123 homolog	0.525439	3.06619	2.36605	0.0856594
ZMYND10	O75800	O75800	ZMY10_HUMAN	Zinc finger MYND domain-containing protein 10	-1.17656	-2.2302	1.4861	0.196673
BCAR3	O75815	O75815	BCAR3_HUMAN	Breast cancer anti-estrogen resistance protein 3	0.0788379	0.292547	0.112552	0.889653
POP7	O75817	O75817	POP7_HUMAN	Ribonuclease P protein subunit p20	0.111365	0.948644	0.456308	0.598744
RPP40	O75818	O75818	RPP40_HUMAN	Ribonuclease P protein subunit p40	0.441214	1.75767	1.05513	0.302963
EIF3G	O75821	O75821	EIF3G_HUMAN	Eukaryotic translation initiation factor 3 subunit G	0.0868108	0.785213	0.358595	0.670672
EIF3J	O75822	O75822	EIF3J_HUMAN	Eukaryotic translation initiation factor 3 subunit J	0.0696789	0.617238	0.266551	0.747507
CBR3	O75828	O75828	CBR3_HUMAN	Carbonyl reductase [NADPH] 3	-0.343738	-1.38407	0.755409	0.4213
PSMD10	O75832	O75832	PSD10_HUMAN	26S proteasome non-ATPase regulatory subunit 10	-0.479804	-4.42895	4.00818	0.0179574
AP1G2	O75843	O75843	AP1G2_HUMAN	AP-1 complex subunit gamma-like 2	-0.221319	-1.13504	0.577518	0.519109
ZMPSTE24	O75844	O75844	FACE1_HUMAN	CAAX prenyl protease 1 homolog	0.285702	2.38774	1.64141	0.168416
IDH1	O75874	O75874	IDHC_HUMAN	Isocitrate dehydrogenase [NADP] cytoplasmic	-0.0792509	-0.341136	0.133616	0.86834
GATB	O75879	O75879	GATB_HUMAN	Glutamyl-tRNA(Gln) amidotransferase subunit B, mitochondrial	0.2362	3.27742	2.60727	0.0673564
SCO1	O75880	O75880	SCO1_HUMAN	Protein SCO1 homolog, mitochondrial	-0.15282	-0.995836	0.486015	0.577659
CYP7B1	O75881	O75881	CP7B1_HUMAN	Cytochrome P450 7B1	-0.338578	-1.48673	0.833925	0.38531
ATRN	O75882	O75882	ATRN_HUMAN	Attractin	0.514982	3.29003	2.62187	0.0665045
RBBP9	O75884	O75884	RBBP9_HUMAN	Serine hydrolase RBBP9	0.0571249	0.320334	0.124514	0.876922
STAM2	O75886	O75886	STAM2_HUMAN	Signal transducing adapter molecule 2	-0.413531	-3.07262	2.3733	0.0852795
TUSC2	O75896	O75896	TUSC2_HUMAN	Tumor suppressor candidate 2	-0.372377	-1.65704	0.970655	0.332725
DGAT1	O75907	O75907	DGAT1_HUMAN	Diacylglycerol O-acyltransferase 1	-0.188219	-0.546944	0.230551	0.780068
CCNK	O75909	O75909	CCNK_HUMAN	Cyclin-K	0.167206	1.87936	1.16083	0.270163
DHRS3	O75911	O75911	DHRS3_HUMAN	Short-chain dehydrogenase/reductase 3	0.818371	1.64024	0.956816	0.336684
ARL6IP5	O75915	O75915	PRAF3_HUMAN	PRA1 family protein 3	-0.303951	-1.67985	0.989565	0.325697
PIAS1	O75925	O75925	PIAS1_HUMAN	E3 SUMO-protein ligase PIAS1	0.198084	1.3291	0.714595	0.441342
PIAS2	O75928	Q9Y6X2;O75928	PIAS2_HUMAN	E3 SUMO-protein ligase PIAS2	0.250962	2.13652	1.39639	0.214162
BCAS2	O75934	O75934	SPF27_HUMAN	Pre-mRNA-splicing factor SPF27	0.254392	2.40778	1.66155	0.164395
DCTN3	O75935	O75935	DCTN3_HUMAN	Dynactin subunit 3	0.0174531	0.166706	0.0611708	0.939215
BBOX1	O75936	O75936	BODG_HUMAN	Gamma-butyrobetaine dioxygenase	-0.618979	-2.0479	1.3134	0.233693
DNAJC8	O75937	O75937	DNJC8_HUMAN	DnaJ homolog subfamily C member 8	-0.0840578	-0.670231	0.294672	0.721773
SMNDC1	O75940	O75940	SPF30_HUMAN	Survival of motor neuron-related-splicing factor 30	0.275131	1.81033	1.10041	0.288223
RAD17	O75943	O75943	RAD17_HUMAN	Cell cycle checkpoint protein RAD17	0.177782	0.959535	0.463104	0.594445
ATP5PD	O75947	O75947	ATP5H_HUMAN	ATP synthase subunit d, mitochondrial	0.0459879	0.237773	0.0896279	0.911657
FLOT1	O75955	O75955	FLOT1_HUMAN	Flotillin-1	-0.529086	-2.48507	1.74001	0.15391
TRIO	O75962	O75962	TRIO_HUMAN	Triple functional domain protein	0.185692	1.98224	1.25313	0.247245
ATP5MG	O75964	O75964	ATP5L_HUMAN	ATP synthase subunit g, mitochondrial	0.0321496	0.154811	0.0565485	0.944372
MPDZ	O75970	O75970	MPDZ_HUMAN	Multiple PDZ domain protein	-0.0502127	-0.459036	0.187609	0.818921
CPD	O75976	O75976	CBPD_HUMAN	Carboxypeptidase D	0.423065	2.1621	1.42068	0.209633
GLRX3	O76003	O76003	GLRX3_HUMAN	Glutaredoxin-3	-0.0128689	-0.119436	0.0430377	0.956251
RSL1D1	O76021	O76021	RL1D1_HUMAN	Ribosomal L1 domain-containing protein 1	0.197761	0.87069	0.408697	0.632171
WFS1	O76024	O76024	WFS1_HUMAN	Wolframin	-0.636331	-2.93884	2.22386	0.0994805
ANXA9	O76027	O76027	ANXA9_HUMAN	Annexin A9	-0.888851	-1.34752	0.72818	0.433564
CLPX	O76031	O76031	CLPX_HUMAN	ATP-dependent Clp protease ATP-binding subunit clpX-like, mitochondrial	0.225222	2.51369	1.76938	0.149766
SEC14L2	O76054	O76054	S14L2_HUMAN	SEC14-like protein 2	-0.361707	-1.63614	0.953451	0.337927
TM7SF2	O76062	O76062	ERG24_HUMAN	Delta(14)-sterol reductase TM7SF2	-0.24208	-2.61052	1.86993	0.136081
SNCG	O76070	O76070	SYUG_HUMAN	Gamma-synuclein	0.116137	0.174818	0.064346	0.936148
CIAO1	O76071	O76071	CIAO1_HUMAN	Probable cytosolic iron-sulfur protein assembly protein CIAO1	0.189222	1.6636	0.97608	0.33106
PDE5A	O76074	O76074	PDE5A_HUMAN	cGMP-specific 3',5'-cyclic phosphodiesterase	-0.26016	-0.707147	0.314761	0.705358
DFFB	O76075	O76075	DFFB_HUMAN	DNA fragmentation factor subunit beta	0.151006	1.16387	0.597187	0.508223
SLC22A5	O76082	O76082	OCTN2_HUMAN	Organic cation/carnitine transporter 2	-0.139096	-0.375137	0.148767	0.854476
SRP72	O76094	O76094	SRP72_HUMAN	Signal recognition particle subunit SRP72	-0.236321	-2.00291	1.27199	0.242331
DXO	O77932	O77932	DXO_HUMAN	Decapping and exoribonuclease protein	0.694256	2.96552	2.25343	0.0969522
DDAH1	O94760	O94760	DDAH1_HUMAN	N(G),N(G)-dimethylarginine dimethylaminohydrolase 1	-1.3284	-7.02379	7.30889	0.00416667
RECQL5	O94762	O94762	RECQ5_HUMAN	ATP-dependent DNA helicase Q5	0.0414088	0.366776	0.14501	0.856785
URI1	O94763	O94763	RMP_HUMAN	Unconventional prefoldin RPB5 interactor 1	0.535361	4.44163	4.02416	0.0180978
B3GAT3	O94766	Q9NPZ5;O94766	B3GA3_HUMAN	Galactosylgalactosylxylosylprotein 3-beta-glucuronosyltransferase 3	-0.119445	-0.991787	0.48344	0.579776
MTA2	O94776	O94776	MTA2_HUMAN	Metastasis-associated protein MTA2	0.40381	3.96688	3.43228	0.0313
ALDH1A2	O94788	O94788	AL1A2_HUMAN	Retinal dehydrogenase 2	-1.46242	-4.66715	4.30961	0.0137199
STK10	O94804	O94804	STK10_HUMAN	Serine/threonine-protein kinase 10	-0.20411	-2.1512	1.41032	0.211794
GFPT2	O94808	O94808	GFPT2_HUMAN	Glutamine--fructose-6-phosphate aminotransferase [isomerizing] 2	0.194339	0.722195	0.323067	0.698562
TPPP	O94811	O94811	TPPP_HUMAN	Tubulin polymerization-promoting protein	-1.28291	-2.52338	1.77935	0.148188
SLIT2	O94813	O94813	SLIT2_HUMAN	Slit homolog 2 protein	-0.30435	-0.642698	0.279956	0.734753
KBTBD11	O94819	O94819	KBTBB_HUMAN	Kelch repeat and BTB domain-containing protein 11	-0.46383	-2.1702	1.42841	0.208234
LTN1	O94822	O94822	LTN1_HUMAN	E3 ubiquitin-protein ligase listerin	-0.0817329	-0.836058	0.388133	0.648629
TOMM70	O94826	O94826	TOM70_HUMAN	Mitochondrial import receptor subunit TOM70	0.325331	2.93351	2.21796	0.100097
IPO13	O94829	O94829	IPO13_HUMAN	Importin-13	0.0924249	0.42485	0.171531	0.833988
DDHD2	O94830	O94830	DDHD2_HUMAN	Phospholipase DDHD2	-0.930902	-3.87307	3.31724	0.0347015
MYO1D	O94832	O94832	MYO1D_HUMAN	Unconventional myosin-Id	-0.522691	-4.18152	3.69807	0.0252081
TOX4	O94842	O94842	TOX4_HUMAN	TOX high mobility group box family member 4	-0.0274866	-0.230376	0.0865986	0.914787
SEC24D	O94855	O94855	SC24D_HUMAN	Protein transport protein Sec24D	0.11276	0.520266	0.217276	0.791382
NFASC	O94856	O94856	NFASC_HUMAN	Neurofascin	-0.77179	-1.14669	0.585432	0.515142
SUPT7L	O94864	O94864	ST65G_HUMAN	STAGA complex 65 subunit gamma	0.149875	1.23606	0.6475	0.478178
FCHSD2	O94868	O94868	FCSD2_HUMAN	F-BAR and double SH3 domains protein 2	0.231618	1.11826	0.566178	0.524708
UFL1	O94874	Q92845;O94874	UFL1_HUMAN	E3 UFM1-protein ligase 1	-0.496007	-3.93521	3.39336	0.0322131
SORBS2	O94875	O94875	SRBS2_HUMAN	Sorbin and SH3 domain-containing protein 2	-0.798533	-3.35219	2.69413	0.0621765
TMCC1	O94876	O94876	TMCC1_HUMAN	Transmembrane and coiled-coil domains protein 1	0.21102	1.23619	0.647598	0.478302
PHF14	O94880	O94880	PHF14_HUMAN	PHD finger protein 14	0.162475	1.06118	0.528252	0.547664
TMEM63A	O94886	O94886	CSCL1_HUMAN	CSC1-like protein 1	-0.225454	-0.848774	0.395642	0.641755
FARP2	O94887	O94887	FARP2_HUMAN	FERM, ARHGEF and pleckstrin domain-containing protein 2	-0.274299	-1.45132	0.80651	0.396127
UBXN7	O94888	O94888	UBXN7_HUMAN	UBX domain-containing protein 7	0.270681	2.13959	1.3993	0.213483
LRIG2	O94898	O94898	LRIG2_HUMAN	Leucine-rich repeats and immunoglobulin-like domains protein 2	0.597425	1.60542	0.928373	0.346394
SUN1	O94901	O94901	SUN1_HUMAN	SUN domain-containing protein 1	-0.228372	-2.44394	1.6981	0.159007
PLPBP	O94903	O94903	PLPHP_HUMAN	Pyridoxal phosphate homeostasis protein	-0.864222	-6.10141	6.14506	0.0051875
ERLIN2	O94905	O94905	ERLN2_HUMAN	Erlin-2	-1.06375	-7.01597	7.29916	0.004
PRPF6	O94906	O94906	PRP6_HUMAN	Pre-mRNA-processing factor 6	0.120442	0.959772	0.463252	0.594368
ADGRL1	O94910	O94910	AGRL1_HUMAN	Adhesion G protein-coupled receptor L1	-0.284543	-1.14534	0.584515	0.515737
ABCA8	O94911	O94911	ABCA8_HUMAN	ABC-type organic anion transporter ABCA8	0.116802	0.281516	0.107865	0.892631
PCF11	O94913	O94913	PCF11_HUMAN	Pre-mRNA cleavage complex 2 protein Pcf11	0.120841	1.33531	0.719163	0.439183
FRYL	O94915	O94915	FRYL_HUMAN	Protein furry homolog-like	0.00742083	0.085584	0.0304377	0.969017
ENDOD1	O94919	O94919	ENDD1_HUMAN	Endonuclease domain-containing 1 protein	-0.176056	-1.27323	0.674006	0.463855
GLCE	O94923	O94923	GLCE_HUMAN	D-glucuronyl C5-epimerase	0.032158	0.193472	0.0717194	0.930929
GLS	O94925	O94925	GLSK_HUMAN	Glutaminase kidney isoform, mitochondrial	0.129682	0.684227	0.30224	0.715241
HAUS5	O94927	O94927	HAUS5_HUMAN	HAUS augmin-like complex subunit 5	-0.0279346	-0.198174	0.0735933	0.928489
FBXO21	O94952	O94952	FBX21_HUMAN	F-box only protein 21	-0.659748	-2.90603	2.18764	0.102758
KDM4B	O94953	O94953	KDM4B_HUMAN	Lysine-specific demethylase 4B	0.167969	0.586669	0.250714	0.762197
SOGA1	O94964	O94964	SOGA1_HUMAN	Protein SOGA1	0.356074	4.53134	4.13745	0.0164058
USP19	O94966	O94966	UBP19_HUMAN	Ubiquitin carboxyl-terminal hydrolase 19	0.0288785	0.462765	0.189384	0.817435
WDR47	O94967	O94967	WDR47_HUMAN	WD repeat-containing protein 47	-0.348161	-1.60347	0.92679	0.347235
AP2A2	O94973	O94973	AP2A2_HUMAN	AP-2 complex subunit alpha-2	-0.339209	-3.20831	2.52765	0.0728179
SEC31A	O94979	O94979	SC31A_HUMAN	Protein transport protein Sec31A	-0.0569936	-0.488041	0.201523	0.807058
CLSTN1	O94985	O94985	CSTN1_HUMAN	Calsyntenin-1	0.33006	0.719392	0.321515	0.699554
FAM13A	O94988	O94988	FA13A_HUMAN	Protein FAM13A	-0.0382633	-0.221068	0.082809	0.918442
SLITRK5	O94991	O94991	SLIK5_HUMAN	SLIT and NTRK-like protein 5	-1.68655	-5.84891	5.8224	0.006
HEXIM1	O94992	O94992	HEXI1_HUMAN	Protein HEXIM1	0.39968	4.23545	3.76536	0.0236288
TJP3	O95049	O95049	ZO3_HUMAN	Tight junction protein ZO-3	-0.488332	-2.77713	2.04714	0.116343
RPP14	O95059	O95059	RPP14_HUMAN	Ribonuclease P protein subunit p14	0.522198	2.41841	1.67227	0.162855
YIF1A	O95070	O95070	YIF1A_HUMAN	Protein YIF1A	-0.0374927	-0.207763	0.077435	0.923615
UBR5	O95071	O95071	UBR5_HUMAN	E3 ubiquitin-protein ligase UBR5	0.278255	2.96726	2.25537	0.0968063
REC8	O95072	O95072	REC8_HUMAN	Meiotic recombination protein REC8 homolog	0.0257556	0.0733497	0.0259626	0.972698
AGFG2	O95081	O95081	AGFG2_HUMAN	Arf-GAP domain and FG repeat-containing protein 2	-0.524237	-1.99083	1.26095	0.24493
SCAF4	O95104	O95104	SCAF4_HUMAN	SR-related and CTD-associated factor 4	0.0850444	0.776503	0.353614	0.67459
S1PR2	O95136	O95136	S1PR2_HUMAN	Sphingosine 1-phosphate receptor 2	0.317383	1.27786	0.677334	0.462012
NDUFB6	O95139	O95139	NDUB6_HUMAN	NADH dehydrogenase [ubiquinone] 1 beta subcomplex subunit 6	-0.0601718	-0.11634	0.041872	0.957382
MFN2	O95140	O95140	MFN2_HUMAN	Mitofusin-2	0.506118	5.22321	5.02001	0.00879012
SNUPN	O95149	O95149	SPN1_HUMAN	Snurportin-1	-0.17619	-1.21485	0.632559	0.48667
UBE4B	O95155	O95155	UBE4B_HUMAN	Ubiquitin conjugation factor E4 B	0.288546	3.4559	2.81579	0.055708
ZFPL1	O95159	O95159	ZFPL1_HUMAN	Zinc finger protein-like 1	0.000399355	0.00196768	0.000677216	0.999386
ELP1	O95163	O95163	ELP1_HUMAN	Elongator complex protein 1	-0.20617	-2.43724	1.69131	0.159932
NDUFA3	O95167	O95167	NDUA3_HUMAN	NADH dehydrogenase [ubiquinone] 1 alpha subcomplex subunit 3	-0.215226	-1.27578	0.67584	0.462692
NDUFB4	O95168	O95168	NDUB4_HUMAN	NADH dehydrogenase [ubiquinone] 1 beta subcomplex subunit 4	-0.484221	-3.8557	3.29601	0.0354121
NDUFB8	O95169	O95169	NDUB8_HUMAN	NADH dehydrogenase [ubiquinone] 1 beta subcomplex subunit 8, mitochondrial	-0.519141	-3.64054	3.03551	0.0450728
NDUFB2	O95178	O95178	NDUB2_HUMAN	NADH dehydrogenase [ubiquinone] 1 beta subcomplex subunit 2, mitochondrial	-0.151523	-0.470934	0.193287	0.815078
NDUFA7	O95182	O95182	NDUA7_HUMAN	NADH dehydrogenase [ubiquinone] 1 alpha subcomplex subunit 7	-0.46293	-2.51747	1.77326	0.149371
VAMP5	O95183	O95183	VAMP5_HUMAN	Vesicle-associated membrane protein 5	-0.756036	-1.39493	0.763573	0.418034
RTN3	O95197	O95197	RTN3_HUMAN	Reticulon-3	0.1521	0.898004	0.425172	0.621353
LETM1	O95202	O95202	LETM1_HUMAN	Mitochondrial proton/calcium exchanger protein	0.37372	3.40789	2.7593	0.0584609
EPN2	O95208	O95208	EPN2_HUMAN	Epsin-2	0.216021	1.45666	0.810621	0.394815
STBD1	O95210	O95210	STBD1_HUMAN	Starch-binding domain-containing protein 1	-1.22469	-3.18411	2.49993	0.0748205
ZRANB2	O95218	O95218	ZRAB2_HUMAN	Zinc finger Ran-binding domain-containing protein 2	0.1001	0.898415	0.425421	0.621263
SNX4	O95219	O95219	SNX4_HUMAN	Sorting nexin-4	0.03506	0.26647	0.10153	0.897205
LUC7L3	O95232	O95232	LC7L3_HUMAN	Luc7-like protein 3	0.284353	2.16041	1.41907	0.20977
APOL3	O95236	O95236	APOL3_HUMAN	Apolipoprotein L3	-0.136368	-0.293214	0.112836	0.889371
MBD4	O95243	O95243	MBD4_HUMAN	Methyl-CpG-binding domain protein 4	0.434405	2.48965	1.7447	0.153198
SBF1	O95248	O95248	MTMR5_HUMAN	Myotubularin-related protein 5	-0.312168	-5.6224	5.53214	0.00712
GOSR1	O95249	O95249	GOSR1_HUMAN	Golgi SNAP receptor complex member 1	-0.302246	-2.4028	1.65653	0.165512
KAT7	O95251	O95251	KAT7_HUMAN	Histone acetyltransferase KAT7	-0.274012	-2.14275	1.40229	0.212931
ATE1	O95260	O95260	ATE1_HUMAN	Arginyl-tRNA--protein transferase 1	-0.215686	-2.8513	2.12764	0.108802
VAPB	O95292	O95292	VAPB_HUMAN	Vesicle-associated membrane protein-associated protein B/C	-0.0942356	-0.783438	0.357578	0.671316
RASAL1	O95294	O95294	RASL1_HUMAN	RasGAP-activating-like protein 1	0.0717873	0.177894	0.0655554	0.935322
SNAPIN	O95295	O95295	SNAPN_HUMAN	SNARE-associated protein Snapin	-0.266266	-2.83055	2.10502	0.11115
MPZL1	O95297	O95297	MPZL1_HUMAN	Myelin protein zero-like protein 1	-0.338212	-0.947159	0.455383	0.599142
NDUFC2	O95298	O95298	NDUC2_HUMAN	NADH dehydrogenase [ubiquinone] 1 subunit C2	-0.357931	-2.03582	1.30223	0.236056
NDUFA10	O95299	O95299	NDUAA_HUMAN	NADH dehydrogenase [ubiquinone] 1 alpha subcomplex subunit 10, mitochondrial	-0.49446	-3.61835	3.0089	0.0463735
FKBP9	O95302	O95302	FKBP9_HUMAN	Peptidyl-prolyl cis-trans isomerase FKBP9	0.49127	2.80943	2.08207	0.113025
CELF2	O95319	O95319	CELF2_HUMAN	CUGBP Elav-like family member 2	0.251121	1.49785	0.842609	0.381094
PGLS	O95336	O95336	6PGL_HUMAN	6-phosphogluconolactonase	-0.509349	-2.43539	1.68943	0.160313
PAPSS2	O95340	O95340	PAPS2_HUMAN	Bifunctional 3'-phosphoadenosine 5'-phosphosulfate synthase 2	-0.487316	-2.03691	1.30324	0.235742
SMC2	O95347	O95347	SMC2_HUMAN	Structural maintenance of chromosomes protein 2	0.926255	2.87431	2.1528	0.10642
ATG7	O95352	O95352	ATG7_HUMAN	Ubiquitin-like modifier-activating enzyme ATG7	-0.440345	-4.69156	4.34062	0.0135918
TACC2	O95359	O95359	TACC2_HUMAN	Transforming acidic coiled-coil-containing protein 2	-0.091835	-0.786025	0.359061	0.670423
FARS2	O95363	O95363	SYFM_HUMAN	Phenylalanine--tRNA ligase, mitochondrial	-0.0723568	-0.456811	0.186553	0.820188
LYPLA2	O95372	O95372	LYPA2_HUMAN	Acyl-protein thioesterase 2	0.420059	1.93891	1.21393	0.256906
IPO7	O95373	O95373	IPO7_HUMAN	Importin-7	-0.11438	-1.0612	0.528262	0.547766
ARIH2	O95376	O95376	ARI2_HUMAN	E3 ubiquitin-protein ligase ARIH2	-0.00795384	-0.0668647	0.0236074	0.974567
TNFAIP8	O95379	O95379	TFIP8_HUMAN	Tumor necrosis factor alpha-induced protein 8	-0.403111	-1.23027	0.643411	0.480401
MAP3K6	O95382	O95382	M3K6_HUMAN	Mitogen-activated protein kinase kinase kinase 6	0.234047	0.871557	0.409217	0.632377
SLU7	O95391	O95391	SLU7_HUMAN	Pre-mRNA-splicing factor SLU7	0.249856	1.4696	0.820618	0.391164
PGM3	O95394	O95394	AGM1_HUMAN	Phosphoacetylglucosamine mutase	0.0103	0.0735978	0.0260529	0.972633
MOCS3	O95396	O95396	MOCS3_HUMAN	Adenylyltransferase and sulfurtransferase MOCS3	-0.0819441	-0.74911	0.338095	0.686551
CD2BP2	O95400	O95400	CD2B2_HUMAN	CD2 antigen cytoplasmic tail-binding protein 2	0.0899445	0.571384	0.2429	0.769895
MED26	O95402	O95402	MED26_HUMAN	Mediator of RNA polymerase II transcription subunit 26	0.172777	1.38472	0.755894	0.421212
SVIL	O95425	O95425	SVIL_HUMAN	Supervillin	0.109617	0.733833	0.329538	0.692692
PIGN	O95427	O95427	PIGN_HUMAN	GPI ethanolamine phosphate transferase 1	0.112501	0.38804	0.154605	0.849427
PAPLN	O95428	O95428	PPN_HUMAN	Papilin	0.111482	0.528162	0.221182	0.787115
BAG4	O95429	O95429	BAG4_HUMAN	BAG family molecular chaperone regulator 4	-0.481356	-4.30659	3.85438	0.0213235
AHSA1	O95433	O95433	AHSA1_HUMAN	Activator of 90 kDa heat shock protein ATPase homolog 1	-0.71954	-3.2071	2.52626	0.0728119
SLC34A2	O95436	O95436	NPT2B_HUMAN	Sodium-dependent phosphate transport protein 2B	0.281632	1.05499	0.524193	0.550725
PARN	O95453	O95453	PARN_HUMAN	Poly(A)-specific ribonuclease PARN	0.236644	2.04709	1.31265	0.23379
PSMG1	O95456	O95456	PSMG1_HUMAN	Proteasome assembly chaperone 1	-0.248473	-1.49353	0.83923	0.382665
FMNL1	O95466	O95466	FMNL1_HUMAN	Formin-like protein 1	0.400467	2.19594	1.45306	0.203145
SGPL1	O95470	O95470	SGPL1_HUMAN	Sphingosine-1-phosphate lyase 1	1.12194	5.12996	4.90047	0.00939326
CTDNEP1	O95476	O95476	CNEP1_HUMAN	CTD nuclear envelope phosphatase 1	0.160258	1.57725	0.905608	0.356157
NSA2	O95478	O95478	NSA2_HUMAN	Ribosome biogenesis protein NSA2 homolog	0.451754	2.37919	1.63285	0.169887
H6PD	O95479	O95479	G6PE_HUMAN	GDH/6PGL endoplasmic bifunctional protein	-0.0452919	-0.176891	0.0651606	0.935311
SEC24A	O95486	O95486	SC24A_HUMAN	Protein transport protein Sec24A	0.163098	1.35744	0.735531	0.430456
SEC24B	O95487	O95487	SC24B_HUMAN	Protein transport protein Sec24B	-0.398397	-4.24895	3.78223	0.0232864
ADGRL2	O95490	O95490	AGRL2_HUMAN	Adhesion G protein-coupled receptor L2	-0.050599	-0.373183	0.147887	0.854986
SLC2A10	O95528	O95528	GTR10_HUMAN	Solute carrier family 2, facilitated glucose transporter member 10	0.209856	0.602849	0.259061	0.75454
TDP2	O95551	O95551	TYDP2_HUMAN	Tyrosyl-DNA phosphodiesterase 2	0.546691	3.69599	3.10221	0.0424598
SFT2D2	O95562	O95562	SFT2B_HUMAN	Vesicle transport protein SFT2B	0.9304	2.52895	1.7851	0.147486
MPC2	O95563	O95563	MPC2_HUMAN	Mitochondrial pyruvate carrier 2	-0.184473	-1.23614	0.647557	0.478231
ETHE1	O95571	O95571	ETHE1_HUMAN	Persulfide dioxygenase ETHE1, mitochondrial	0.367825	1.81881	1.10776	0.286198
ACSL3	O95573	O95573	ACSL3_HUMAN	Fatty acid CoA ligase Acsl3	0.0485533	0.321355	0.124957	0.876538
POLR1A	O95602	O95602	RPA1_HUMAN	DNA-directed RNA polymerase I subunit RPA1	0.215312	1.64134	0.957717	0.336529
PCNT	O95613	O95613	PCNT_HUMAN	Pericentrin	0.269448	3.91471	3.36822	0.0329932
YEATS4	O95619	O95619	YETS4_HUMAN	YEATS domain-containing protein 4	0.111701	0.947707	0.455725	0.599205
ZBTB11	O95625	O95625	ZBT11_HUMAN	Zinc finger and BTB domain-containing protein 11	-0.0724832	-0.655464	0.286751	0.728587
CNOT4	O95628	O95628	CNOT4_HUMAN	CCR4-NOT transcription complex subunit 4	0.0840755	0.592864	0.253901	0.759418
STAMBP	O95630	O95630	STABP_HUMAN	STAM-binding protein	-0.0820489	-0.723145	0.323594	0.698183
NTN1	O95631	O95631	NET1_HUMAN	Netrin-1	-0.722588	-2.5694	1.827	0.141879
CPSF4	O95639	O95639	CPSF4_HUMAN	Cleavage and polyadenylation specificity factor subunit 4	0.32539	1.28753	0.684313	0.458156
NFATC1	O95644	O95644	NFAC1_HUMAN	Nuclear factor of activated T-cells, cytoplasmic 1	-0.448305	-4.16318	3.67524	0.0257004
ASMTL	O95671	O95671	ASML_HUMAN	Probable bifunctional dTTP/UTP pyrophosphatase/methyltransferase protein	-0.720678	-3.52965	2.9031	0.0506926
CDS2	O95674	O95674	CDS2_HUMAN	Phosphatidate cytidylyltransferase 2	-0.224487	-1.86573	1.14881	0.274145
EYA4	O95677	O95677	EYA4_HUMAN	Eyes absent homolog 4	0.99687	2.24675	1.50217	0.193701
CEP43	O95684	O95684	CEP43_HUMAN	Centrosomal protein 43	-0.247144	-1.12795	0.572714	0.521086
PPP1R3D	O95685	O95685	PPR3D_HUMAN	Protein phosphatase 1 regulatory subunit 3D	-0.310308	-1.23559	0.647174	0.47828
BRD1	O95696	O95696	BRD1_HUMAN	Bromodomain-containing protein 1	0.136966	0.973059	0.471594	0.588478
POP4	O95707	O95707	RPP29_HUMAN	Ribonuclease P protein subunit p29	0.183051	0.79107	0.361958	0.667823
HERC2	O95714	O95714	HERC2_HUMAN	E3 ubiquitin-protein ligase HERC2	0.0408507	0.547145	0.230652	0.780025
RAB3D	O95716	P20337;O95716;Q96E17	RAB3D_HUMAN	Ras-related protein Rab-3D	0.374153	1.52275	0.862177	0.372905
SNAP29	O95721	O95721	SNP29_HUMAN	Synaptosomal-associated protein 29	-0.0258134	-0.228163	0.0856952	0.915713
OXSR1	O95747	O95747	OXSR1_HUMAN	Serine/threonine-protein kinase OSR1	-0.0995704	-0.670558	0.294848	0.721618
GGPS1	O95749	O95749	GGPPS_HUMAN	Geranylgeranyl pyrophosphate synthase	0.0473947	0.278102	0.106422	0.894141
RAB36	O95755	O95755	RAB36_HUMAN	Ras-related protein Rab-36	-0.66105	-2.85748	2.13438	0.1079
HSPA4L	O95757	O95757	HS74L_HUMAN	Heat shock 70 kDa protein 4L	-1.3133	-3.19954	2.51759	0.0734903
PTBP3	O95758	O95758	PTBP3_HUMAN	Polypyrimidine tract-binding protein 3	-0.575276	-3.11449	2.42064	0.0811156
TBC1D8	O95759	O95759	TBCD8_HUMAN	TBC1 domain family member 8	-0.364957	-1.7145	1.01856	0.314434
STARD3NL	O95772	O95772	STR3N_HUMAN	STARD3 N-terminal-like protein	0.62292	2.35532	1.60901	0.173834
LSM8	O95777	O95777	LSM8_HUMAN	U6 snRNA-associated Sm-like protein LSm8	0.346989	2.02692	1.29402	0.237639
AP2A1	O95782	O95782	AP2A1_HUMAN	AP-2 complex subunit alpha-1	-0.0397348	-0.454286	0.185355	0.821719
WIZ	O95785	O95785	WIZ_HUMAN	Protein Wiz	0.37341	2.44306	1.69721	0.159179
RIGI	O95786	O95786	RIGI_HUMAN	Antiviral innate immune response receptor RIG-I	0.301983	2.00697	1.27571	0.241399
STAU1	O95793	O95793	STAU1_HUMAN	Double-stranded RNA-binding protein Staufen homolog 1	0.229683	1.63335	0.951163	0.338605
TTC4	O95801	O95801	TTC4_HUMAN	Tetratricopeptide repeat protein 4	0.00402783	0.0525582	0.0184528	0.980643
CAVIN2	O95810	O95810	CAVN2_HUMAN	Caveolae-associated protein 2	-0.0588686	-0.0840078	0.0298588	0.968656
BAG2	O95816	O95816	BAG2_HUMAN	BAG family molecular chaperone regulator 2	0.67303	3.18805	2.50443	0.0743927
BAG3	O95817	O95817	BAG3_HUMAN	BAG family molecular chaperone regulator 3	-0.615766	-3.61276	3.00221	0.0465493
MAP4K4	O95819	O95819	M4K4_HUMAN	Mitogen-activated protein kinase kinase kinase kinase 4	0.41117	3.29373	2.62615	0.06616
MLYCD	O95822	O95822	DCMC_HUMAN	Malonyl-CoA decarboxylase, mitochondrial	-0.185093	-1.74686	1.04593	0.305325
CRYZL1	O95825	O95825	QORL1_HUMAN	Quinone oxidoreductase-like protein 1	-0.219207	-1.76814	1.06407	0.299972
AIFM1	O95831	O95831	AIFM1_HUMAN	Apoptosis-inducing factor 1, mitochondrial	0.29076	1.14278	0.582772	0.516828
CLDN1	O95832	O95832	CLD1_HUMAN	Claudin-1	-1.11986	-1.88681	1.16743	0.268546
CLIC3	O95833	O95833	CLIC3_HUMAN	Chloride intracellular channel protein 3	-0.667288	-1.17316	0.603575	0.504686
EML2	O95834	O95834	EMAL2_HUMAN	Echinoderm microtubule-associated protein-like 2	-0.501414	-2.22548	1.48154	0.197351
LATS1	O95835	O95835	LATS1_HUMAN	Serine/threonine-protein kinase LATS1	-0.867048	-1.689	0.997191	0.323083
NUDT14	O95848	O95848	NUD14_HUMAN	Uridine diphosphate glucose pyrophosphatase NUDT14	-0.420997	-1.35567	0.734215	0.430493
TSPAN15	O95858	O95858	TSN15_HUMAN	Tetraspanin-15	-0.741747	-3.56509	2.94527	0.0487009
BPNT1	O95861	O95861	BPNT1_HUMAN	3'(2'),5'-bisphosphate nucleotidase 1	0.131471	0.64946	0.283549	0.731804
DDAH2	O95865	O95865	DDAH2_HUMAN	N(G),N(G)-dimethylarginine dimethylaminohydrolase 2	0.159804	0.672532	0.295912	0.720397
ABHD16A	O95870	O95870	ABHGA_HUMAN	Phosphatidylserine lipase ABHD16A	0.142537	1.10344	0.556242	0.529917
C6orf47	O95873	O95873	CF047_HUMAN	Uncharacterized protein C6orf47	0.108642	0.74092	0.333499	0.690364
WDPCP	O95876	O95876	FRITZ_HUMAN	WD repeat-containing and planar cell polarity effector protein fritz homolog	-1.81654	-1.47299	0.823247	0.390055
TXNDC12	O95881	O95881	TXD12_HUMAN	Thioredoxin domain-containing protein 12	0.199342	1.21108	0.629919	0.488432
TRUB2	O95900	O95900	TRUB2_HUMAN	Pseudouridylate synthase TRUB2, mitochondrial	0.210693	0.924763	0.441529	0.607824
ECD	O95905	O95905	ECD_HUMAN	Protein ecdysoneless homolog	-0.342922	-1.3724	0.746669	0.425433
SYF2	O95926	O95926	SYF2_HUMAN	Pre-mRNA-splicing factor SYF2	0.293702	2.15289	1.41192	0.211401
CBX7	O95931	O95931	CBX7_HUMAN	Chromobox protein homolog 7	-0.257131	-1.57784	0.906083	0.356024
EFEMP2	O95967	O95967	FBLN4_HUMAN	EGF-containing fibulin-like extracellular matrix protein 2	-0.473449	-1.17037	0.601651	0.50569
MBD3	O95983	O95983	MBD3_HUMAN	Methyl-CpG-binding domain protein 3	0.569891	3.35599	2.69857	0.0620677
TOP3B	O95985	O95985	TOP3B_HUMAN	DNA topoisomerase 3-beta-1	-0.159674	-1.90553	1.18406	0.264026
NUDT3	O95989	O95989	NUDT3_HUMAN	Diphosphoinositol polyphosphate phosphohydrolase 1	0.0635021	0.324226	0.126207	0.875807
FAM107A	O95990	O95990	F107A_HUMAN	Actin-associated protein FAM107A	-0.211409	-0.737063	0.331342	0.691624
AGR2	O95994	O95994	AGR2_HUMAN	Anterior gradient protein 2 homolog	-0.957238	-1.31632	0.70523	0.44607
GAS8	O95995	O95995	DRC4_HUMAN	Dynein regulatory complex subunit 4	-1.1752	-1.86452	1.14774	0.274345
BCL10	O95999	O95999	BCL10_HUMAN	B-cell lymphoma/leukemia 10	0.182823	1.71755	1.02113	0.313279
NDUFB10	O96000	O96000	NDUBA_HUMAN	NADH dehydrogenase [ubiquinone] 1 beta subcomplex subunit 10	-0.504799	-2.96843	2.25666	0.0966405
CLPTM1	O96005	O96005	CLPT1_HUMAN	Putative lipid scramblase CLPTM1	-0.260328	-1.49007	0.836533	0.383792
ZBED1	O96006	O96006	ZBED1_HUMAN	E3 SUMO-protein ligase ZBED1	-0.418697	-2.76741	2.03666	0.117095
MOCS2	O96007	O96007	MOC2B_HUMAN	Molybdopterin synthase catalytic subunit	-0.557038	-2.89663	2.1773	0.103529
TOMM40	O96008	O96008	TOM40_HUMAN	Mitochondrial import receptor subunit TOM40 homolog	0.409319	3.50169	2.86993	0.0525012
PEX11B	O96011	O96011	PX11B_HUMAN	Peroxisomal membrane protein 11B	0.254215	2.47123	1.72587	0.155225
PAK4	O96013	O96013	PAK4_HUMAN	Serine/threonine-protein kinase PAK 4	0.304872	2.73073	1.99728	0.120709
DNAL4	O96015	O96015	DNAL4_HUMAN	Dynein axonemal light chain 4	-0.892822	-1.97846	1.24969	0.247575
CHEK2	O96017	O96017	CHK2_HUMAN	Serine/threonine-protein kinase Chk2	0.652744	4.27685	3.81713	0.0224748
ACTL6A	O96019	O96019	ACL6A_HUMAN	Actin-like protein 6A	0.255729	2.39345	1.64714	0.167258
MT-CYB	P00156	P00156	CYB_HUMAN	Cytochrome b	0.603537	2.57765	1.83559	0.140515
CYB5A	P00167	P00167	CYB5_HUMAN	Cytochrome b5	-0.619661	-2.21067	1.46723	0.199791
ADH1B	P00325	P00325;P08319	ADH1B_HUMAN	All-trans-retinol dehydrogenase [NAD(+)] ADH1B	0.0785304	0.173485	0.0638231	0.936489
ADH1C	P00326	P00326	ADH1G_HUMAN	Alcohol dehydrogenase 1C	-0.177554	-0.327326	0.127559	0.874908
LDHA	P00338	P00338	LDHA_HUMAN	L-lactate dehydrogenase A chain	-0.787864	-3.17433	2.48875	0.0756912
ALDH1A1	P00352	P00352	AL1A1_HUMAN	Aldehyde dehydrogenase 1A1	-1.56472	-4.38223	3.94936	0.0191816
CYB5R3	P00387	P00387	NB5R3_HUMAN	NADH-cytochrome b5 reductase 3	-0.26253	-1.88951	1.16982	0.267752
GSR	P00390	P00390	GSHR_HUMAN	Glutathione reductase, mitochondrial	-1.02279	-7.21297	7.5437	0.00421053
MT-CO1	P00395	P00395	COX1_HUMAN	Cytochrome c oxidase subunit 1	0.267022	1.1418	0.582108	0.517147
MT-CO2	P00403	P00403	COX2_HUMAN	Cytochrome c oxidase subunit 2	0.111242	0.581485	0.248055	0.764847
MT-CO3	P00414	P00414	COX3_HUMAN	Cytochrome c oxidase subunit 3	-0.954777	-3.02047	2.31471	0.0910456
SOD1	P00441	P00441	SODC_HUMAN	Superoxide dismutase [Cu-Zn]	-0.410772	-1.9277	1.20387	0.259085
CP	P00450	P00450	CERU_HUMAN	Ceruloplasmin	0.793652	2.03407	1.30062	0.236112
F13A1	P00488	P00488	F13A_HUMAN	Coagulation factor XIII A chain	0.439109	0.959159	0.462869	0.594624
PNP	P00491	P00491	PNPH_HUMAN	Purine nucleoside phosphorylase	-0.246186	-1.1123	0.562174	0.526388
HPRT1	P00492	P00492	HPRT_HUMAN	Hypoxanthine-guanine phosphoribosyltransferase	-0.237026	-1.20429	0.625173	0.491122
GOT2	P00505	P00505	AATM_HUMAN	Aspartate aminotransferase, mitochondrial	-0.446675	-2.66044	1.92248	0.129753
ABL1	P00519	P00519	ABL1_HUMAN	Tyrosine-protein kinase ABL1	-0.462777	-2.99704	2.28852	0.0937945
EGFR	P00533	P00533	EGFR_HUMAN	Epidermal growth factor receptor	-0.2007	-1.62628	0.945374	0.340668
PGK1	P00558	P00558	PGK1_HUMAN	Phosphoglycerate kinase 1	-0.584116	-3.87324	3.31744	0.0347516
AK1	P00568	P00568	KAD1_HUMAN	Adenylate kinase isoenzyme 1	-1.0085	-1.84769	1.13296	0.278626
F2	P00734	P00734	THRB_HUMAN	Prothrombin	0.289907	0.895031	0.423368	0.622591
C1R	P00736	P00736	C1R_HUMAN	Complement C1r subcomponent	-0.370865	-1.04982	0.520818	0.552577
HP	P00738	P00738	HPT_HUMAN	Haptoglobin	1.07182	1.4268	0.787727	0.405437
F9	P00740	P00740	FA9_HUMAN	Coagulation factor IX	1.10115	2.07403	1.33768	0.227919
CFD	P00746	P00746	CFAD_HUMAN	Complement factor D	-0.0391305	-0.0938774	0.0334949	0.965339
F12	P00748	P00748	FA12_HUMAN	Coagulation factor XII	0.0447342	0.0853044	0.0303349	0.968828
CFB	P00751	P00751	CFAB_HUMAN	Complement factor B	0.604145	1.7663	1.0625	0.300292
ADA	P00813	P00813	ADA_HUMAN	Adenosine deaminase	0.741713	2.55573	1.81281	0.143915
MT-ATP6	P00846	P00846	ATP6_HUMAN	ATP synthase subunit a	0.00596552	0.0237908	0.00825895	0.991381
CA1	P00915	P00915	CAH1_HUMAN	Carbonic anhydrase 1	0.258566	0.393477	0.15708	0.846967
CA2	P00918	P00918	CAH2_HUMAN	Carbonic anhydrase 2	-0.217004	-0.76964	0.349704	0.677805
ASS1	P00966	P00966	ASSY_HUMAN	Argininosuccinate synthase	-0.975467	-3.48696	2.85248	0.0535556
OAS1	P00973	P00973	OAS1_HUMAN	2'-5'-oligoadenylate synthase 1	0.557495	1.36051	0.73781	0.429489
SERPINC1	P01008	P01008	ANT3_HUMAN	Antithrombin-III	0.300268	0.82574	0.382076	0.652065
SERPINA1	P01009	P01009	A1AT_HUMAN	Alpha-1-antitrypsin	0.357355	0.690145	0.305457	0.713357
SERPINA3	P01011	P01011	AACT_HUMAN	Alpha-1-antichymotrypsin	0.39867	0.813165	0.374737	0.657224
AGT	P01019	P01019	ANGT_HUMAN	Angiotensinogen	0.381163	0.818739	0.377985	0.654709
A2M	P01023	P20742;P01023	A2MG_HUMAN	Alpha-2-macroglobulin	0.590609	1.13331	0.576344	0.51942
C3	P01024	P01024	CO3_HUMAN	Complement C3	0.78267	2.18124	1.43897	0.205717
C5	P01031	P01031	CO5_HUMAN	Complement C5	0.554914	2.00786	1.27652	0.241396
TIMP1	P01033	P01033	TIMP1_HUMAN	Metalloproteinase inhibitor 1	0.268571	0.58699	0.250878	0.762206
CST3	P01034	P01034	CYTC_HUMAN	Cystatin-C	0.365498	1.75427	1.05224	0.303636
CSTA	P01040	P01040	CYTA_HUMAN	Cystatin-A	0.0528332	0.122589	0.0442277	0.95502
KNG1	P01042	P01042	KNG1_HUMAN	Kininogen-1	0.381528	0.843123	0.392299	0.645168
NRAS	P01111	P01111;P01112	RASN_HUMAN	GTPase NRas	0.171851	1.76436	1.06084	0.301084
HRAS	P01112	P01112	RASH_HUMAN	GTPase HRas	-1.68704	-5.45657	5.3194	0.00810084
KRAS	P01116	P01116	RASK_HUMAN	GTPase KRas	-0.250242	-1.90576	1.18426	0.264021
TGFB1	P01137	P01137	TGFB1_HUMAN	Transforming growth factor beta-1 proprotein	-0.284287	-0.679774	0.299825	0.71666
JCHAIN	P01591	P01591	IGJ_HUMAN	Immunoglobulin J chain	0.860571	1.02965	0.507708	0.561577
IGKV1-39;IGKV1D-39	P01597;P04432	P04432;P01597;A0A0C4DH73;A0A0C4DH72;P01611	KV139_HUMAN;KVD39_HUMAN	Immunoglobulin kappa variable 1-39	1.36453	2.7437	2.01118	0.119314
IGKV1-5	P01602	P01602	KV105_HUMAN	Immunoglobulin kappa variable 1-5	0.866217	1.46186	0.814632	0.393681
IGKV3-20	P01619	P01619	KV320_HUMAN	Immunoglobulin kappa variable 3-20	0.966411	1.56525	0.895975	0.360153
IGLV1-47	P01700	P01700	LV147_HUMAN	Immunoglobulin lambda variable 1-47	0.805674	1.55749	0.88977	0.362031
CD8A	P01732	P01732	CD8A_HUMAN	T-cell surface glycoprotein CD8 alpha chain	-0.962865	-2.4713	1.72594	0.155272
IGHV1-46	P01743	P01743	HV146_HUMAN	Immunoglobulin heavy variable 1-46	0.431458	1.27005	0.671721	0.465029
IGHV3-7	P01780	P01780	HV307_HUMAN	Immunoglobulin heavy variable 3-7	0.843855	1.52969	0.867661	0.370337
PIGR	P01833	P01833	PIGR_HUMAN	Polymeric immunoglobulin receptor	1.06666	1.17784	0.606805	0.503083
IGKC	P01834	P01834	IGKC_HUMAN	Immunoglobulin kappa constant	0.594817	0.955626	0.46066	0.596564
IGHG1	P01857	P01859;P01857	IGHG1_HUMAN	Immunoglobulin heavy constant gamma 1	0.356654	0.55066	0.232417	0.7783
IGHG2	P01859	P01859	IGHG2_HUMAN	Immunoglobulin heavy constant gamma 2	0.39833	0.71509	0.319137	0.701468
IGHG3	P01860	P01860	IGHG3_HUMAN	Immunoglobulin heavy constant gamma 3	-0.602583	-1.13556	0.577868	0.518974
IGHG4	P01861	P01861	IGHG4_HUMAN	Immunoglobulin heavy constant gamma 4	0.76198	1.3534	0.732528	0.431252
IGHM	P01871	P01871	IGHM_HUMAN	Immunoglobulin heavy constant mu	0.513081	0.75248	0.339992	0.685159
IGHA1	P01876	P01877;P01876	IGHA1_HUMAN	Immunoglobulin heavy constant alpha 1	1.12543	1.15701	0.592481	0.511117
IGHA2	P01877	P01877	IGHA2_HUMAN	Immunoglobulin heavy constant alpha 2	0.733935	0.910294	0.432657	0.615022
HLA-B	P01889	P01889;P04439	HLAB_HUMAN	HLA class I histocompatibility antigen, B alpha chain	0.553984	1.56079	0.892404	0.361245
HLA-H	P01893	P01893	HLAH_HUMAN	Putative HLA class I histocompatibility antigen, alpha chain H	-0.00794595	-0.0157163	0.00543857	0.994097
HLA-DRA	P01903	P01903;P01906	DRA_HUMAN	HLA class II histocompatibility antigen, DR alpha chain	-0.167303	-0.407941	0.163706	0.840569
HLA-DQA1	P01909	P01909	DQA1_HUMAN	HLA class II histocompatibility antigen, DQ alpha 1 chain	-0.263107	-0.365561	0.144465	0.85707
HLA-DRB1	P01911	P01911	DRB1_HUMAN	HLA class II histocompatibility antigen, DRB1 beta chain	0.142975	0.293119	0.112796	0.889316
HLA-DQB1	P01920	P01920	DQB1_HUMAN	HLA class II histocompatibility antigen, DQ beta 1 chain	-0.227805	-0.367002	0.145111	0.85686
HBD	P02042	P02042	HBD_HUMAN	Hemoglobin subunit delta	0.397027	0.460753	0.188426	0.818183
MB	P02144	P02144	MYG_HUMAN	Myoglobin	-0.529509	-1.17111	0.602162	0.505542
COL1A1	P02452	P02452	CO1A1_HUMAN	Collagen alpha-1(I) chain	-0.129986	-0.244794	0.0925178	0.907633
COL3A1	P02461	P02461	CO3A1_HUMAN	Collagen alpha-1(III) chain	-0.0795444	-0.136189	0.0493923	0.950969
COL4A1	P02462	P02462;P29400	CO4A1_HUMAN	Collagen alpha-1(IV) chain	-0.475273	-1.49167	0.837778	0.383105
CRYAB	P02511	P02511	CRYAB_HUMAN	Alpha-crystallin B chain	0.200827	0.548548	0.231356	0.77961
LMNA	P02545	P02545	LMNA_HUMAN	Prelamin-A/C	-0.523747	-3.5403	2.91575	0.0501595
SPTA1	P02549	P02549	SPTA1_HUMAN	Spectrin alpha chain, erythrocytic 1	1.1585	1.63175	0.949851	0.339125
APOA1	P02647	P02647	APOA1_HUMAN	Apolipoprotein A-I	0.613478	1.06535	0.530985	0.546135
APOE	P02649	P02649	APOE_HUMAN	Apolipoprotein E	0.843758	1.82441	1.11263	0.284761
APOA2	P02652	P02652	APOA2_HUMAN	Apolipoprotein A-II	0.531471	1.24183	0.651592	0.476542
APOC3	P02656	P02656	APOC3_HUMAN	Apolipoprotein C-III	0.672531	1.29246	0.687879	0.455724
FGA	P02671	P02671	FIBA_HUMAN	Fibrinogen alpha chain	0.566525	1.13126	0.574957	0.519537
FGB	P02675	P02675	FIBB_HUMAN	Fibrinogen beta chain	0.573624	1.06105	0.528165	0.547635
FGG	P02679	P02679	FIBG_HUMAN	Fibrinogen gamma chain	0.579932	0.971324	0.470501	0.589064
MBP	P02686	P02686	MBP_HUMAN	Myelin basic protein	-0.58346	-2.45262	1.70692	0.157447
SLC4A1	P02730	P02730	B3AT_HUMAN	Band 3 anion transport protein	0.956285	1.05727	0.525684	0.549775
APCS	P02743	P02743	SAMP_HUMAN	Serum amyloid P-component	0.562593	1.65474	0.968754	0.333114
C1QA	P02745	P02745	C1QA_HUMAN	Complement C1q subcomponent subunit A	0.531999	1.26793	0.670202	0.465826
C1QB	P02746	P02746	C1QB_HUMAN	Complement C1q subcomponent subunit B	0.428951	1.1125	0.562309	0.526356
C1QC	P02747	P02747	C1QC_HUMAN	Complement C1q subcomponent subunit C	0.551182	1.29992	0.693284	0.452785
APOH	P02749	P02749	APOH_HUMAN	Beta-2-glycoprotein 1	0.100156	0.25345	0.0961003	0.903487
LRG1	P02750	P02750	A2GL_HUMAN	Leucine-rich alpha-2-glycoprotein	0.446002	0.938373	0.44993	0.602901
AMBP	P02760	P02760	AMBP_HUMAN	Protein AMBP	0.160899	0.402331	0.161129	0.842987
ORM1	P02763	P02763	A1AG1_HUMAN	Alpha-1-acid glycoprotein 1	0.479744	0.605901	0.260644	0.753661
AHSG	P02765	P02765	FETUA_HUMAN	Alpha-2-HS-glycoprotein	0.0703771	0.185503	0.0685573	0.933526
TTR	P02766	P02766	TTHY_HUMAN	Transthyretin	0.576414	1.50601	0.849008	0.377996
ALB	P02768	P02768	ALBU_HUMAN	Albumin	0.110448	0.240021	0.0905515	0.910296
GC	P02774	P02774	VTDB_HUMAN	Vitamin D-binding protein	0.200206	0.484185	0.199659	0.808783
TFRC	P02786	P02786	TFR1_HUMAN	Transferrin receptor protein 1	0.690032	2.09522	1.35748	0.223727
TF	P02787	P02787	TRFE_HUMAN	Serotransferrin	0.201014	0.431142	0.174465	0.831647
HPX	P02790	P02790	HEMO_HUMAN	Hemopexin	0.378486	0.860698	0.402728	0.636603
FTL	P02792	P02792	FRIL_HUMAN	Ferritin light chain	1.99822	4.47383	4.06477	0.0173075
FTH1	P02794	P02794	FRIH_HUMAN	Ferritin heavy chain	1.22558	3.23327	2.55633	0.0705361
ESR1	P03372	P03372	ESR1_HUMAN	Estrogen receptor	-0.434651	-1.61777	0.938423	0.342441
MT-ND1	P03886	P03886	NU1M_HUMAN	NADH-ubiquinone oxidoreductase chain 1	-0.207436	-1.65756	0.971089	0.33256
MT-ND2	P03891	P03891	NU2M_HUMAN	NADH-ubiquinone oxidoreductase chain 2	-0.651009	-2.08407	1.34704	0.226009
MT-ND3	P03897	P03897	NU3M_HUMAN	NADH-ubiquinone oxidoreductase chain 3	-0.559414	-1.33024	0.715434	0.440828
MT-ND4	P03905	P03905	NU4M_HUMAN	NADH-ubiquinone oxidoreductase chain 4	-0.418115	-2.23144	1.48731	0.196594
MT-ND5	P03915	P03915	NU5M_HUMAN	NADH-ubiquinone oxidoreductase chain 5	-0.10143	-0.401146	0.160586	0.843406
MT-ND6	P03923	P03923	NU6M_HUMAN	NADH-ubiquinone oxidoreductase chain 6	-0.48346	-3.16716	2.48055	0.0762785
KLKB1	P03952	P03952	KLKB1_HUMAN	Plasma kallikrein	0.41071	1.22154	0.637257	0.483933
C4BPA	P04003	P04003	C4BPA_HUMAN	C4b-binding protein alpha chain	0.682504	1.31182	0.701946	0.447535
VTN	P04004	P04004	VTNC_HUMAN	Vitronectin	0.381393	0.94618	0.454774	0.59927
CAT	P04040	P04040	CATA_HUMAN	Catalase	-0.783862	-4.3707	3.93487	0.019542
RAF1	P04049	P04049	RAF1_HUMAN	RAF proto-oncogene serine/threonine-protein kinase	-0.690693	-1.76735	1.0634	0.300038
GBA1	P04062	P04062	GBA1_HUMAN	Lysosomal acid glucosylceramidase	-0.0147696	-0.0700378	0.0247584	0.974158
FUCA1	P04066	P04066	FUCO_HUMAN	Tissue alpha-L-fucosidase	-0.518682	-1.76973	1.06544	0.299332
ALDOA	P04075	P04075	ALDOA_HUMAN	Fructose-bisphosphate aldolase A	-0.588425	-3.47259	2.83549	0.0546244
CSTB	P04080	P04080	CYTB_HUMAN	Cystatin-B	-0.885886	-3.10827	2.41359	0.0817736
ANXA1	P04083	P04083	ANXA1_HUMAN	Annexin A1	-1.07157	-4.9643	4.68842	0.0105138
APOB	P04114	P04114	APOB_HUMAN	Apolipoprotein B-100	0.80385	1.41641	0.779821	0.409404
NR3C1	P04150	P04150	GCR_HUMAN	Glucocorticoid receptor	-0.151023	-1.37784	0.750743	0.42395
PRNP	P04156	P04156	PRIO_HUMAN	Major prion protein	-0.119586	-0.545818	0.229986	0.780341
SOD2	P04179	P04179	SODM_HUMAN	Superoxide dismutase [Mn], mitochondrial	-0.113233	-0.300516	0.115959	0.885587
OAT	P04181	P04181	OAT_HUMAN	Ornithine aminotransferase, mitochondrial	-0.00742864	-0.0317818	0.0110678	0.988913
HRG	P04196	P04196	HRG_HUMAN	Histidine-rich glycoprotein	0.313841	1.01438	0.497869	0.56962
THY1	P04216	P04216	THY1_HUMAN	Thy-1 membrane glycoprotein	-0.917226	-1.75074	1.04923	0.304559
A1BG	P04217	P04217	A1BG_HUMAN	Alpha-1B-glycoprotein	0.361305	0.882276	0.415658	0.62808
CD74	P04233	P04233	HG2A_HUMAN	HLA class II histocompatibility antigen gamma chain	0.0712561	0.212841	0.0794798	0.921852
TUBB4A	P04350	P04350	TBB4A_HUMAN	Tubulin beta-4A chain	1.08094	2.92439	2.20788	0.101205
GAPDH	P04406	P04406	G3P_HUMAN	Glyceraldehyde-3-phosphate dehydrogenase	0.211139	0.966979	0.467771	0.590959
ASL	P04424	P04424	ARLY_HUMAN	Argininosuccinate lyase	0.265138	1.38441	0.755667	0.421304
HLA-A	P04439	P04439	HLAA_HUMAN	HLA class I histocompatibility antigen, A alpha chain	0.804706	2.62141	1.88136	0.134904
HLA-DPB1	P04440	P04440	DPB1_HUMAN	HLA class II histocompatibility antigen, DP beta 1 chain	0.593369	0.798338	0.366146	0.664062
ERBB2	P04626	P04626	ERBB2_HUMAN	Receptor tyrosine-protein kinase erbB-2	0.0203819	0.227989	0.0856243	0.915588
CAPNS1	P04632	Q96L46;P04632	CPNS1_HUMAN	Calpain small subunit 1	-1.03857	-5.25006	5.05445	0.00866242
HSPB1	P04792	P04792	HSPB1_HUMAN	Heat shock protein beta-1	-0.756147	-4.41236	3.98728	0.0183053
CYBB	P04839	P04839	CY24B_HUMAN	Cytochrome b-245 heavy chain	0.306529	1.0223	0.502964	0.565359
RPN1	P04843	P04843	RPN1_HUMAN	Dolichyl-diphosphooligosaccharide--protein glycosyltransferase subunit 1	-0.0125329	-0.0810774	0.0287844	0.969255
RPN2	P04844	P04844	RPN2_HUMAN	Dolichyl-diphosphooligosaccharide--protein glycosyltransferase subunit 2	0.111024	0.837688	0.389093	0.648107
GNAI2	P04899	P04899	GNAI2_HUMAN	Guanine nucleotide-binding protein G(i) subunit alpha-2	-0.657966	-3.97123	3.43763	0.0312029
SLC4A2	P04920	P04920;P48751	B3A2_HUMAN	Anion exchange protein 2	-0.980445	-3.79247	3.219	0.0385477
ATP1A1	P05023	P05023	AT1A1_HUMAN	Sodium/potassium-transporting ATPase subunit alpha-1	-0.0916361	-0.76771	0.348607	0.678578
ATP1B1	P05026	P05026	AT1B1_HUMAN	Sodium/potassium-transporting ATPase subunit beta-1	-0.754619	-4.89539	4.60035	0.0105514
APP	P05067	P05067	A4_HUMAN	Amyloid-beta precursor protein	0.165957	1.14881	0.586877	0.514604
ARG1	P05089	P05089	ARGI1_HUMAN	Arginase-1	-0.102462	-0.153224	0.0559347	0.944568
APOD	P05090	P05090	APOD_HUMAN	Apolipoprotein D	0.0763416	0.284557	0.109154	0.89171
ALDH2	P05091	P05091;O94788	ALDH2_HUMAN	Aldehyde dehydrogenase, mitochondrial	-0.232731	-0.767026	0.348219	0.678869
ITGB2	P05107	P05107	ITB2_HUMAN	Integrin beta-2	0.170423	0.869577	0.408031	0.632651
S100A8	P05109	P05109	S10A8_HUMAN	Protein S100-A8	-0.310405	-0.411668	0.165424	0.839536
HMGN1	P05114	P05114	HMGN1_HUMAN	Non-histone chromosomal protein HMG-14	-0.692222	-3.84302	3.28055	0.0359746
SLC25A5	P05141	P05141;P12236;P12235;Q9H0C2	ADT2_HUMAN	ADP/ATP translocase 2	0.310418	1.50284	0.846523	0.379236
SERPINA5	P05154	P05154	IPSP_HUMAN	Plasma serine protease inhibitor	-0.394961	-1.09016	0.547386	0.535347
SERPING1	P05155	P05155	IC1_HUMAN	Plasma protease C1 inhibitor	0.588396	1.45567	0.809857	0.395206
CFI	P05156	P05156	CFAI_HUMAN	Complement factor I	0.0937992	0.352838	0.138792	0.862544
ISG15	P05161	P05161	ISG15_HUMAN	Ubiquitin-like protein ISG15	0.995109	2.25025	1.50557	0.192929
MPO	P05164	P05164	PERM_HUMAN	Myeloperoxidase	0.500251	0.822436	0.380143	0.653194
PCCA	P05165	P05165	PCCA_HUMAN	Propionyl-CoA carboxylase alpha chain, mitochondrial	-0.394292	-2.49526	1.75045	0.152456
PCCB	P05166	P05166	PCCB_HUMAN	Propionyl-CoA carboxylase beta chain, mitochondrial	-0.416321	-2.52923	1.78539	0.147501
ALPL	P05186	P05186	PPBT_HUMAN	Alkaline phosphatase, tissue-nonspecific isozyme	0.494216	0.70548	0.313845	0.70619
EIF2S1	P05198	P05198	IF2A_HUMAN	Eukaryotic translation initiation factor 2 subunit 1	0.0992838	1.31887	0.707094	0.445357
ICAM1	P05362	P05362	ICAM1_HUMAN	Intercellular adhesion molecule 1	0.283783	1.34158	0.72379	0.436085
RPLP1	P05386	P05386	RLA1_HUMAN	Large ribosomal subunit protein P1	-0.144356	-0.974456	0.472474	0.588283
RPLP2	P05387	P05387	RLA2_HUMAN	Large ribosomal subunit protein P2	0.156818	0.830483	0.384856	0.650837
RPLP0	P05388	P05388	RLA0_HUMAN	Large ribosomal subunit protein uL10	-0.232193	-1.21244	0.630874	0.487801
JUN	P05412	P05412	JUN_HUMAN	Transcription factor Jun	0.101384	0.402548	0.161228	0.843198
FABP3	P05413	P05413	FABPH_HUMAN	Fatty acid-binding protein, heart	-0.737153	-1.77346	1.06863	0.297853
POLR3D	P05423	P05423	RPC4_HUMAN	DNA-directed RNA polymerase III subunit RPC4	0.300116	1.78888	1.08188	0.293517
SSB	P05455	P05455	LA_HUMAN	Lupus La protein	0.0190774	0.14327	0.0521019	0.948905
SERPINA7	P05543	P05543	THBG_HUMAN	Thyroxine-binding globulin	0.82753	1.72896	1.03076	0.310599
SERPIND1	P05546	P05546	HEP2_HUMAN	Heparin cofactor 2	0.550718	1.39194	0.761326	0.418783
ITGB1	P05556	P05556	ITB1_HUMAN	Integrin beta-1	0.212934	1.8115	1.10142	0.288261
COL5A2	P05997	P05997	CO5A2_HUMAN	Collagen alpha-2(V) chain	-0.18721	-0.329087	0.128328	0.874413
UROD	P06132	P06132	DCUP_HUMAN	Uroporphyrinogen decarboxylase	-0.0368059	-0.261654	0.0995156	0.899396
INSR	P06213	P06213	INSR_HUMAN	Insulin receptor	-0.608147	-3.29982	2.63321	0.0657062
FYN	P06241	P06241	FYN_HUMAN	Tyrosine-protein kinase Fyn	-0.272544	-1.55379	0.886816	0.363019
GLA	P06280	P06280	AGAL_HUMAN	Alpha-galactosidase A	-0.74982	-3.98564	3.45538	0.0309725
IGKV4-1	P06312	P06312	KV401_HUMAN	Immunoglobulin kappa variable 4-1	0.981646	1.66628	0.978299	0.330315
HLA-DOA	P06340	P06340	DOA_HUMAN	HLA class II histocompatibility antigen, DO alpha chain	-0.869542	-1.45816	0.811777	0.394263
RB1	P06400	P06400	RB_HUMAN	Retinoblastoma-associated protein	0.290514	2.44049	1.6946	0.1595
PGR	P06401	P06401	PRGR_HUMAN	Progesterone receptor	-0.947015	-1.3629	0.739592	0.429215
PTMA	P06454	P06454	PTMA_HUMAN	Prothymosin alpha	0.276224	1.28112	0.679681	0.460619
CDK1	P06493	P06493	CDK1_HUMAN	Cyclin-dependent kinase 1	1.01579	4.44045	4.02267	0.0180488
ATP5F1B	P06576	P06576	ATPB_HUMAN	ATP synthase subunit beta, mitochondrial	0.143437	1.05472	0.524017	0.550793
C2	P06681	P06681	CO2_HUMAN	Complement C2	0.852753	3.17119	2.48515	0.0759674
S100A9	P06702	P06702	S10A9_HUMAN	Protein S100-A9	-0.216338	-0.272667	0.104131	0.895608
S100A6	P06703	P06703	S10A6_HUMAN	Protein S100-A6	0.533398	1.55297	0.886156	0.363085
APOA4	P06727	P06727	APOA4_HUMAN	Apolipoprotein A-IV	0.0721683	0.191214	0.0708216	0.931669
EIF4E	P06730	P06730	IF4E_HUMAN	Eukaryotic translation initiation factor 4E	-0.491782	-3.09262	2.39587	0.0831741
ENO1	P06733	P06733	ENOA_HUMAN	Alpha-enolase	-0.135875	-0.664304	0.291485	0.724326
PYGL	P06737	P06737	PYGL_HUMAN	Glycogen phosphorylase, liver form	0.101428	0.619274	0.267616	0.746295
GPI	P06744	P06744	G6PI_HUMAN	Glucose-6-phosphate isomerase	0.245602	0.999988	0.488661	0.576434
POLB	P06746	P06746	DPOLB_HUMAN	DNA polymerase beta	-0.124036	-1.38847	0.758712	0.420092
NPM1	P06748	P06748	NPM_HUMAN	Nucleophosmin	0.129303	0.584374	0.249536	0.763269
TPM3	P06753	P06753	TPM3_HUMAN	Tropomyosin alpha-3 chain	0.0826216	0.693374	0.307218	0.711306
ITGAV	P06756	P06756	ITAV_HUMAN	Integrin alpha-V	-0.118377	-0.854968	0.399317	0.639012
HEXA	P06865	P06865	HEXA_HUMAN	Beta-hexosaminidase subunit alpha	-0.0343964	-0.189746	0.0702385	0.932123
EPHX1	P07099	P07099	HYEP_HUMAN	Epoxide hydrolase 1	-0.261331	-0.991075	0.482988	0.580059
DBI	P07108	P07108	ACBP_HUMAN	Acyl-CoA-binding protein	-0.650445	-2.59026	1.84874	0.138908
CENPB	P07199	P07199	CENPB_HUMAN	Major centromere autoantigen B	-0.060496	-0.359898	0.141934	0.859464
GPX1	P07203	P07203	GPX1_HUMAN	Glutathione peroxidase 1	0.140312	0.694557	0.307864	0.710591
PGK2	P07205	P07205	PGK2_HUMAN	Phosphoglycerate kinase 2	-0.315295	-1.66124	0.974125	0.331672
PROS1	P07225	P07225	PROS_HUMAN	Vitamin K-dependent protein S	0.386015	1.29445	0.689319	0.455078
P4HB	P07237	P07237	PDIA1_HUMAN	Protein disulfide-isomerase	0.0321579	0.118922	0.0428439	0.956488
H1-0	P07305	P07305	H10_HUMAN	Histone H1.0	-1.50029	-3.98176	3.45059	0.0309527
ACYP1	P07311	P07311	ACYP1_HUMAN	Acylphosphatase-1	-0.99314	-3.18915	2.5057	0.0743324
CRYGC	P07315	P07315	CRGC_HUMAN	Gamma-crystallin C	-0.676591	-1.64162	0.957952	0.336666
FES	P07332	P16591;P07332	FES_HUMAN	Tyrosine-protein kinase Fes/Fps	-0.335009	-2.18491	1.44248	0.205144
CTSD	P07339	P07339	CATD_HUMAN	Cathepsin D	-0.580641	-1.73465	1.03557	0.309332
ANXA2	P07355	P07355;A6NMY6	ANXA2_HUMAN	Annexin A2	-0.7303	-4.67748	4.32273	0.0135232
C8A	P07357	P07357	CO8A_HUMAN	Complement component C8 alpha chain	0.375877	0.696749	0.309061	0.710243
C8B	P07358	P07358	CO8B_HUMAN	Complement component C8 beta chain	0.298237	0.838508	0.389576	0.647918
C8G	P07360	P07360	CO8G_HUMAN	Complement component C8 gamma chain	0.626686	1.66801	0.979735	0.329738
CAPN1	P07384	P07384	CAN1_HUMAN	Calpain-1 catalytic subunit	-0.502551	-3.4619	2.82287	0.0551312
DCN	P07585	P07585	PGS2_HUMAN	Decorin	-0.525756	-0.803037	0.368861	0.662158
PSAP	P07602	P07602	SAP_HUMAN	Prosaposin	0.199436	1.01249	0.496659	0.570341
HEXB	P07686	P07686	HEXB_HUMAN	Beta-hexosaminidase subunit beta	-0.0616143	-0.285599	0.109596	0.891327
CTSL	P07711	P07711	CATL1_HUMAN	Procathepsin L	-1.24542	-4.1737	3.68833	0.0253451
BPGM	P07738	P07738	PMGE_HUMAN	Bisphosphoglycerate mutase	0.59492	2.42229	1.67618	0.162194
APRT	P07741	P07741	APT_HUMAN	Adenine phosphoribosyltransferase	-0.601215	-3.05768	2.35647	0.0866002
EPRS1	P07814	P07814	SYEP_HUMAN	Bifunctional glutamate/proline--tRNA ligase	0.112989	1.10001	0.553947	0.53161
CTSB	P07858	P07858	CATB_HUMAN	Cathepsin B	-0.37081	-1.37586	0.749262	0.424282
HSP90AA1	P07900	P07900	HS90A_HUMAN	Heat shock protein HSP 90-alpha	-0.622709	-2.7236	1.98964	0.120936
GALT	P07902	P07902	GALT_HUMAN	Galactose-1-phosphate uridylyltransferase	-0.326804	-1.57002	0.899803	0.358836
HNRNPC	P07910	P07910	HNRPC_HUMAN	Heterogeneous nuclear ribonucleoproteins C1/C2	-0.023259	-0.16402	0.0601235	0.939971
UQCRH	P07919	P07919	QCR6_HUMAN	Cytochrome b-c1 complex subunit 6, mitochondrial	0.213713	0.945864	0.454578	0.599279
LAMB1	P07942	P07942	LAMB1_HUMAN	Laminin subunit beta-1	-0.234775	-0.603358	0.259325	0.75426
YES1	P07947	P07947	YES_HUMAN	Tyrosine-protein kinase Yes	-0.501198	-2.54219	1.79878	0.145526
LYN	P07948	P07948	LYN_HUMAN	Tyrosine-protein kinase Lyn	0.0158661	0.0908435	0.0323743	0.966342
FH	P07954	P07954	FUMH_HUMAN	Fumarate hydratase, mitochondrial	0.551615	2.83391	2.10867	0.110669
ERCC1	P07992	P07992	ERCC1_HUMAN	DNA excision repair protein ERCC-1	0.1293	0.701824	0.311839	0.707761
ZFX;ZFY	P08048;P17010	P08048;P17010	ZFX_HUMAN;ZFY_HUMAN	Zinc finger Y-chromosomal protein	-0.305143	-1.8949	1.17461	0.266513
IGF1R	P08069	P08069	IGF1R_HUMAN	Insulin-like growth factor 1 receptor	-0.171889	-1.47445	0.824379	0.389393
ANXA6	P08133	P08133	ANXA6_HUMAN	Annexin A6	-0.442279	-2.10927	1.37067	0.220154
RHOC	P08134	P08134	RHOC_HUMAN	Rho-related GTP-binding protein RhoC	0.115989	0.635376	0.276081	0.737758
SERPINA6	P08185	P08185	CBG_HUMAN	Corticosteroid-binding globulin	-0.141363	-0.260207	0.0989121	0.899965
SLC3A2	P08195	P08195	4F2_HUMAN	4F2 cell-surface antigen heavy chain	-0.101053	-0.485899	0.200487	0.80787
GUSB	P08236	P08236	BGLR_HUMAN	Beta-glucuronidase	-0.551444	-3.23917	2.56312	0.0701338
PFKM	P08237	P08237	PFKAM_HUMAN	ATP-dependent 6-phosphofructokinase, muscle type	0.0217147	0.068624	0.0242452	0.974439
HSP90AB1	P08238	P08238	HS90B_HUMAN	Heat shock protein HSP 90-beta	0.137173	0.829219	0.384115	0.651547
SRPRA	P08240	P08240	SRPRA_HUMAN	Signal recognition particle receptor subunit alpha	0.234499	1.33267	0.717223	0.440055
ASNS	P08243	P08243	ASNS_HUMAN	Asparagine synthetase [glutamine-hydrolyzing]	1.49509	5.0789	4.83506	0.00935385
GSTA1	P08263	P08263;Q7RTV2	GSTA1_HUMAN	Glutathione S-transferase A1	-1.2703	-1.92825	1.20437	0.259242
SOD3	P08294	P08294	SODE_HUMAN	Extracellular superoxide dismutase [Cu-Zn]	-0.615419	-1.26059	0.664951	0.469109
CTSG	P08311	P08311	CATG_HUMAN	Cathepsin G	0.346939	0.508848	0.211659	0.796505
HMBS	P08397	P08397	HEM3_HUMAN	Porphobilinogen deaminase	0.104502	0.890194	0.420439	0.624075
MME	P08473	P08473	NEP_HUMAN	Neprilysin	0.339187	0.950862	0.457689	0.597838
PDHA1	P08559	P08559;P29803	ODPA_HUMAN	Pyruvate dehydrogenase E1 component subunit alpha, somatic form, mitochondrial	0.218035	1.47636	0.825859	0.388847
CD14	P08571	P08571	CD14_HUMAN	Monocyte differentiation antigen CD14	0.713789	3.26204	2.58949	0.068601
COL4A2	P08572	P08572	CO4A2_HUMAN	Collagen alpha-2(IV) chain	-0.349038	-1.21576	0.633202	0.48627
CYC1	P08574	P08574	CY1_HUMAN	Cytochrome c1, heme protein, mitochondrial	0.0758812	0.380102	0.151008	0.852175
PTPRC	P08575	P08575	PTPRC_HUMAN	Receptor-type tyrosine-protein phosphatase C	-0.0940675	-0.557375	0.2358	0.774929
SNRPB2	P08579	P08579	RU2B_HUMAN	U2 small nuclear ribonucleoprotein B''	0.00442478	0.0428	0.0149694	0.984776
MELTF	P08582	P08582	TRFM_HUMAN	Melanotransferrin	0.637209	1.48666	0.833872	0.385243
MYL3	P08590	P08590	MYL3_HUMAN	Myosin light chain 3	-0.115398	-0.212557	0.0793655	0.921936
CFH	P08603	P08603	CFAH_HUMAN	Complement factor H	0.452129	1.27341	0.674136	0.463835
FGF4	P08620	P08620	FGF4_HUMAN	Fibroblast growth factor 4	0.252459	0.807667	0.371543	0.659397
SNRNP70	P08621	P08621	RU17_HUMAN	U1 small nuclear ribonucleoprotein 70 kDa	-0.121205	-0.929776	0.444616	0.606213
FCGR3A	P08637	P08637;O75015	FCG3A_HUMAN	Low affinity immunoglobulin gamma Fc region receptor III-A	0.485925	1.59297	0.918288	0.350743
ITGA5	P08648	P08648	ITA5_HUMAN	Integrin alpha-5	0.28606	0.682429	0.301264	0.715896
NFIC	P08651	Q14938;Q12857;O00712;P08651	NFIC_HUMAN	Nuclear factor 1 C-type	-0.564321	-3.73343	3.14742	0.0408746
SERPINF2	P08697	P08697	A2AP_HUMAN	Alpha-2-antiplasmin	0.296247	0.955974	0.460878	0.596427
RPS17	P08708	P08708	RS17_HUMAN	Small ribosomal subunit protein eS17	-0.422629	-2.21407	1.47052	0.199284
GNAI3	P08754	P08754	GNAI3_HUMAN	Guanine nucleotide-binding protein G(i) subunit alpha-3	0.253886	2.51604	1.7718	0.149326
ANXA5	P08758	P08758	ANXA5_HUMAN	Annexin A5	-0.828147	-4.50784	4.10773	0.0168966
STS	P08842	P08842	STS_HUMAN	Steryl-sulfatase	-0.421471	-2.44907	1.70331	0.158046
RPSA	P08865	A0A8I5KQE6;P08865	RSSA_HUMAN	Small ribosomal subunit protein uS2	-0.167096	-1.02186	0.502684	0.565447
CD63	P08962	P08962	CD63_HUMAN	CD63 antigen	-0.653113	-2.36146	1.61513	0.172987
MRPL3	P09001	P09001	RM03_HUMAN	Large ribosomal subunit protein uL3m	-0.112485	-0.743624	0.335014	0.68901
SNRPA	P09012	P09012	SNRPA_HUMAN	U1 small nuclear ribonucleoprotein A	0.0821948	0.622403	0.269255	0.744797
FGF2	P09038	P09038	FGF2_HUMAN	Fibroblast growth factor 2	-1.56501	-4.703	4.35517	0.0132833
HOXB5	P09067	P09067	HXB5_HUMAN	Homeobox protein Hox-B5	0.995949	1.74267	1.04237	0.306767
ENO2	P09104	P09104	ENOG_HUMAN	Gamma-enolase	-0.479991	-1.81445	1.10398	0.287415
ACAA1	P09110	P09110	THIK_HUMAN	3-ketoacyl-CoA thiolase, peroxisomal	0.215608	0.974186	0.472304	0.588366
SRP19	P09132	P09132	SRP19_HUMAN	Signal recognition particle 19 kDa protein	-0.418019	-1.69698	1.00386	0.320447
GSTP1	P09211	P09211	GSTP1_HUMAN	Glutathione S-transferase P	-0.590692	-3.37009	2.71503	0.0614237
SNRPC	P09234	P09234	RU1C_HUMAN	U1 small nuclear ribonucleoprotein C	-0.0497565	-0.344877	0.135266	0.866004
MMP7	P09237	P09237	MMP7_HUMAN	Matrilysin	-0.571226	-0.953351	0.459241	0.59704
LGALS1	P09382	P09382	LEG1_HUMAN	Galectin-1	0.288384	0.707655	0.31504	0.705202
QDPR	P09417	P09417	DHPR_HUMAN	Dihydropteridine reductase	0.0825403	0.41429	0.166635	0.838859
HMGB1	P09429	P09429;P26583	HMGB1_HUMAN	High mobility group protein B1	-0.484457	-2.42993	1.68391	0.160998
RBP1	P09455	P09455	RET1_HUMAN	Retinol-binding protein 1	0.142634	0.524785	0.219509	0.789251
FBP1	P09467	O00757;P09467	F16P1_HUMAN	Fructose-1,6-bisphosphatase 1	-1.02961	-6.27074	6.36068	0.0054902
GNAO1	P09471	P09471	GNAO_HUMAN	Guanine nucleotide-binding protein G(o) subunit alpha	-0.0627617	-0.14071	0.0511206	0.949093
TPM1	P09493	P09493	TPM1_HUMAN	Tropomyosin alpha-1 chain	-0.213298	-0.824456	0.381325	0.652449
CLTA	P09496	P09496	CLCA_HUMAN	Clathrin light chain A	-0.00208754	-0.0117195	0.00404909	0.995541
CLTB	P09497	P09497	CLCB_HUMAN	Clathrin light chain B	0.0530404	0.351744	0.138306	0.863083
ANXA4	P09525	P09525	ANXA4_HUMAN	Annexin A4	-0.756459	-4.18734	3.70533	0.0250493
CNP	P09543	P09543	CN37_HUMAN	2',3'-cyclic-nucleotide 3'-phosphodiesterase	-0.00795279	-0.0824382	0.029283	0.969164
HMOX1	P09601	P09601	HMOX1_HUMAN	Heme oxygenase 1	0.333799	1.32855	0.71419	0.441603
PDGFRB	P09619	P09619	PGFRB_HUMAN	Platelet-derived growth factor receptor beta	-0.0571963	-0.118008	0.0424996	0.956803
DLD	P09622	P09622	DLDH_HUMAN	Dihydrolipoyl dehydrogenase, mitochondrial	0.477688	2.45777	1.71216	0.156801
HNRNPA1	P09651	A0A2R8Y4L2;P09651	ROA1_HUMAN	Heterogeneous nuclear ribonucleoprotein A1	-0.0774108	-0.417154	0.16796	0.83699
SNRPA1	P09661	P09661	RU2A_HUMAN	U2 small nuclear ribonucleoprotein A'	0.192672	1.56079	0.892405	0.361343
CTSH	P09668	P09668	CATH_HUMAN	Pro-cathepsin H	-1.04058	-3.11171	2.41749	0.0814987
COX6C	P09669	P09669	COX6C_HUMAN	Cytochrome c oxidase subunit 6C	0.18758	1.11447	0.56363	0.525891
TACSTD2	P09758	P09758	TACD2_HUMAN	Tumor-associated calcium signal transducer 2	-0.0967743	-0.320299	0.124498	0.876824
C1S	P09871	P09871	C1S_HUMAN	Complement C1s subcomponent	0.606935	1.45555	0.809767	0.395166
PARP1	P09874	P09874	PARP1_HUMAN	Poly [ADP-ribose] polymerase 1	0.717337	4.02447	3.50326	0.0298119
POLA1	P09884	P09884	DPOLA_HUMAN	DNA polymerase alpha catalytic subunit	0.460594	2.37423	1.62788	0.170231
IFIT2	P09913	P09913	IFIT2_HUMAN	Interferon-induced protein with tetratricopeptide repeats 2	0.0352953	0.21959	0.0822092	0.918942
IFIT1	P09914	P09914	IFIT1_HUMAN	Interferon-induced protein with tetratricopeptide repeats 1	0.182658	0.859602	0.402074	0.637318
ALOX5	P09917	P09917	LOX5_HUMAN	Polyunsaturated fatty acid 5-lipoxygenase	-0.125265	-0.350405	0.137713	0.863537
UCHL1	P09936	P09936	UCHL1_HUMAN	Ubiquitin carboxyl-terminal hydrolase isozyme L1	1.07362	1.31497	0.704245	0.446553
FURIN	P09958	P09958	FURIN_HUMAN	Furin	0.605358	2.92012	2.20317	0.101736
LTA4H	P09960	P09960	LKHA4_HUMAN	Leukotriene A-4 hydrolase	-0.586705	-2.28784	1.5423	0.186347
ALDOC	P09972	P09972	ALDOC_HUMAN	Fructose-bisphosphate aldolase C	-0.164449	-0.467287	0.191542	0.816201
C4A	P0C0L4	P0C0L4	CO4A_HUMAN	Complement C4-A	0.403227	1.24184	0.651597	0.476649
H2AZ1;H2AZ2	P0C0S5;Q71UI9	P0C0S5;Q71UI9	H2AV_HUMAN;H2AZ_HUMAN	Histone H2A.Z	-0.837601	-2.59013	1.84861	0.138843
TFPT	P0C1Z6	P0C1Z6	TFPT_HUMAN	TCF3 fusion partner	0.0561193	0.545474	0.229814	0.78037
FBXO45	P0C2W1	P0C2W1	FBSP1_HUMAN	F-box/SPRY domain-containing protein 1	0.46474	4.04286	3.52598	0.0293098
ATXN1L	P0C7T5	P0C7T5	ATX1L_HUMAN	Ataxin-1-like	-0.371354	-2.61146	1.87092	0.136021
ZNF688	P0C7X2	P0C7X2	ZN688_HUMAN	Zinc finger protein 688	-0.604882	-4.26992	3.80845	0.0225843
PLA2G4B	P0C869	P0C869	PA24B_HUMAN	Cytosolic phospholipase A2 beta	0.288723	0.918424	0.437634	0.611253
JMJD7	P0C870	P0C870	JMJD7_HUMAN	Bifunctional peptidase and (3S)-lysyl hydroxylase JMJD7	-1.09325	-5.34927	5.18171	0.00817391
POLR2M	P0CAP2	P0CAP2	GRL1A_HUMAN	DNA-directed RNA polymerase II subunit GRINL1A	-0.556724	-2.7304	1.99692	0.120629
DERPC	P0CG12	P0CG12	DERPC_HUMAN	Decreased expression in renal and prostate cancer protein	-0.217179	-1.6356	0.953011	0.337825
ZNF888	P0CJ79	P0CJ79	ZN888_HUMAN	Zinc finger protein 888	0.315869	1.95853	1.23163	0.252738
SLC35E2B	P0CK96	P0CK96	S352B_HUMAN	Solute carrier family 35 member E2B	-0.0601344	-0.223805	0.0839207	0.91729
LIMS3;LIMS4	P0CW19;P0CW20	P0CW19;P0CW20	LIMS3_HUMAN;LIMS4_HUMAN	LIM and senescent cell antigen-like-containing domain protein 3	-0.515408	-1.90472	1.18334	0.264033
TRAPPC2;TRAPPC2B	P0DI81;P0DI82	P0DI82;P0DI81	TPC2A_HUMAN;TPC2B_HUMAN	Trafficking protein particle complex subunit 2	-0.0675358	-0.369423	0.146197	0.855979
PET100	P0DJ07	P0DJ07	PT100_HUMAN	Protein PET100 homolog, mitochondrial	-0.1337	-0.734463	0.32989	0.692546
HSPA1A;HSPA1B	P0DMV8;P0DMV9	P0DMV9;P0DMV8	HS71A_HUMAN;HS71B_HUMAN	Heat shock 70 kDa protein 1A	-0.366833	-2.32894	1.58281	0.177941
IGLC2	P0DOY2	P0DOY3;P0DOY2	IGLC2_HUMAN	Immunoglobulin lambda constant 2	0.512204	0.895888	0.423887	0.622274
CALM1;CALM2;CALM3	P0DP23;P0DP24;P0DP25	P0DP24;P0DP25;P0DP23	CALM1_HUMAN;CALM2_HUMAN;CALM3_HUMAN	Calmodulin-1	-0.140125	-1.14529	0.584478	0.515661
POLR1D	P0DPB6	P0DPB6	RPAC2_HUMAN	DNA-directed RNA polymerases I and III subunit RPAC2	0.134224	1.06312	0.529525	0.546934
TUBA3C;TUBA3D;TUBA3E	P0DPH7;P0DPH8;Q6PEY2	P0DPH7;Q6PEY2;P0DPH8	TBA3C_HUMAN;TBA3D_HUMAN;TBA3E_HUMAN	Tubulin alpha-3C chain	0.061484	0.0841233	0.0299012	0.968706
ZFTRAF1	P0DTL6	P0DTL6;E9PQ42	ZTRF1_HUMAN	Zinc finger TRAF-type-containing protein 1	0.458545	4.04714	3.53127	0.0291339
FDX1	P10109	P10109	ADX_HUMAN	Adrenodoxin, mitochondrial	-0.0580601	-0.283872	0.108863	0.891721
RAP2A	P10114	P10114	RAP2A_HUMAN	Ras-related protein Rap-2a	0.112053	0.892213	0.42166	0.623357
RO60	P10155	P10155	RO60_HUMAN	RNA-binding protein RO60	-0.407038	-2.75128	2.01931	0.118704
GAA	P10253	P10253	LYAG_HUMAN	Lysosomal alpha-glucosidase	-0.407027	-1.79945	1.09099	0.291099
AR	P10275	P10275	ANDR_HUMAN	Androgen receptor	-1.19099	-4.09126	3.5859	0.0279918
RRAS	P10301	P10301	RRAS_HUMAN	Ras-related protein R-Ras	-0.208	-1.01204	0.496372	0.570318
HLA-C	P10321	P10321	HLAC_HUMAN	HLA class I histocompatibility antigen, C alpha chain	0.146202	0.315634	0.122474	0.879685
ARAF	P10398	P10398	ARAF_HUMAN	Serine/threonine-protein kinase A-Raf	0.0484763	0.389919	0.15546	0.848767
H1-4	P10412	Q02539;P16402;P10412;P16401;P16403	H14_HUMAN	Histone H1.4	-0.502975	-2.75878	2.02737	0.117742
BCL2	P10415	P10415	BCL2_HUMAN	Apoptosis regulator Bcl-2	-0.462726	-2.03705	1.30337	0.235864
DLAT	P10515	P10515	ODP2_HUMAN	Dihydrolipoyllysine-residue acetyltransferase component of pyruvate dehydrogenase complex, mitochondrial	0.0582966	0.330942	0.129139	0.873613
PTPRF	P10586	P10586	PTPRF_HUMAN	Receptor-type tyrosine-protein phosphatase F	-0.205898	-0.838466	0.389551	0.647706
NR2F6	P10588	P10588	NR2F6_HUMAN	Nuclear receptor subfamily 2 group F member 6	0.43047	2.45592	1.71027	0.156852
NR2F1	P10589	P10589	COT1_HUMAN	COUP transcription factor 1	-0.175217	-0.563403	0.238848	0.772657
TXN	P10599	P10599	THIO_HUMAN	Thioredoxin	-1.04376	-3.16153	2.47413	0.0768173
COX5B	P10606	P10606	COX5B_HUMAN	Cytochrome c oxidase subunit 5B, mitochondrial	0.246294	1.36616	0.742018	0.428469
CTSA	P10619	P10619	PPGB_HUMAN	Lysosomal protective protein	0.246002	1.34093	0.723305	0.436406
MGST1	P10620	P10620	MGST1_HUMAN	Microsomal glutathione S-transferase 1	0.890201	1.52721	0.865706	0.371249
C7	P10643	P10643	CO7_HUMAN	Complement component C7	0.230626	0.645249	0.28131	0.733998
PRKAR1A	P10644	P10644	KAP0_HUMAN	cAMP-dependent protein kinase type I-alpha regulatory subunit	-0.164527	-1.00611	0.492569	0.573469
ALPG	P10696	P10696	PPBN_HUMAN	Alkaline phosphatase, germ cell type	-0.987784	-1.73249	1.03375	0.30997
UROS	P10746	P10746	HEM4_HUMAN	Uroporphyrinogen-III synthase	-0.0855901	-0.785776	0.358918	0.670472
ESD	P10768	P10768	ESTD_HUMAN	S-formylglutathione hydrolase	-0.810496	-3.64714	3.04343	0.0448641
HSPD1	P10809	P10809	CH60_HUMAN	60 kDa heat shock protein, mitochondrial	0.72459	3.56874	2.94962	0.0488496
CLU	P10909	P10909	CLUS_HUMAN	Clusterin	-0.12001	-0.354218	0.139405	0.861931
HSPA5	P11021	P11021	BIP_HUMAN	Endoplasmic reticulum chaperone BiP	-0.204896	-0.611825	0.263726	0.750034
LAMC1	P11047	P11047	LAMC1_HUMAN	Laminin subunit gamma-1	0.191181	0.60907	0.262292	0.751706
ACP2	P11117	P11117	PPAL_HUMAN	Lysosomal acid phosphatase	0.0573528	0.290666	0.11175	0.89015
MAP2	P11137	P11137	MTAP2_HUMAN	Microtubule-associated protein 2	0.0466833	0.0712318	0.0251922	0.973891
HSPA8	P11142	P11142;P54652	HSP7C_HUMAN	Heat shock cognate 71 kDa protein	-0.0940646	-0.498223	0.206467	0.802435
SLC2A1	P11166	P11166	GTR1_HUMAN	Solute carrier family 2, facilitated glucose transporter member 1	0.688994	2.18138	1.4391	0.205842
EPB41	P11171	P11171	EPB41_HUMAN	Protein 4.1	0.514515	2.65355	1.91521	0.13071
UMPS	P11172	P11172	UMPS_HUMAN	Uridine 5'-monophosphate synthase	0.663849	6.04427	6.07214	0.00505556
PDHB	P11177	P11177	ODPB_HUMAN	Pyruvate dehydrogenase E1 component subunit beta, mitochondrial	0.263654	1.561	0.892571	0.361339
DBT	P11182	P11182	ODB2_HUMAN	Lipoamide acyltransferase component of branched-chain alpha-keto acid dehydrogenase complex, mitochondrial	0.701006	4.94867	4.66844	0.0106486
ITGAM	P11215	P11215	ITAM_HUMAN	Integrin alpha-M	0.374319	1.98952	1.25976	0.245133
PYGB	P11216	P06737;P11217;P11216	PYGB_HUMAN	Glycogen phosphorylase, brain form	0.0201693	0.128948	0.046636	0.952943
PYGM	P11217	P11217	PYGM_HUMAN	Glycogen phosphorylase, muscle form	0.100554	0.449933	0.183295	0.82345
RALA	P11233	P11233	RALA_HUMAN	Ras-related protein Ral-A	-0.000569178	-0.00398245	0.00137173	0.998942
RALB	P11234	P11234	RALB_HUMAN	Ras-related protein Ral-B	-0.532729	-5.01272	4.75035	0.0100097
BCR	P11274	P11274	BCR_HUMAN	Breakpoint cluster region protein	0.132022	1.12313	0.569464	0.522727
SPTB	P11277	P11277	SPTB1_HUMAN	Spectrin beta chain, erythrocytic	0.0594345	0.179612	0.0662317	0.935165
LAMP1	P11279	P11279	LAMP1_HUMAN	Lysosome-associated membrane glycoprotein 1	0.172138	1.25021	0.657545	0.472857
ACADM	P11310	P11310	ACADM_HUMAN	Medium-chain specific acyl-CoA dehydrogenase, mitochondrial	-0.135335	-0.674646	0.297053	0.719255
TOP1	P11387	P11387	TOP1_HUMAN	DNA topoisomerase 1	0.430294	3.49292	2.85953	0.0533826
G6PD	P11413	P11413	G6PD_HUMAN	Glucose-6-phosphate 1-dehydrogenase	-0.0712006	-0.652809	0.285334	0.729881
UBL4A	P11441	P11441	UBL4A_HUMAN	Ubiquitin-like protein 4A	-0.0726149	-0.731341	0.328149	0.694305
ESRRA	P11474	P11474	ERR1_HUMAN	Steroid hormone receptor ERR1	-0.428485	-1.68295	0.992151	0.324851
PC	P11498	P11498	PYC_HUMAN	Pyruvate carboxylase, mitochondrial	0.824046	2.69629	1.96051	0.124519
DMD	P11532	P11532	DMD_HUMAN	Dystrophin	-0.18736	-0.98225	0.477395	0.584647
MTHFD1	P11586	P11586	C1TC_HUMAN	C-1-tetrahydrofolate synthase, cytoplasmic	-0.103542	-0.475645	0.195546	0.813327
IGF2R	P11717	P11717	MPRI_HUMAN	Cation-independent mannose-6-phosphate receptor	0.444718	4.47133	4.06162	0.017326
ADH5	P11766	P11766	ADHX_HUMAN	Alcohol dehydrogenase class-3	-0.952702	-4.61271	4.24051	0.0147778
CDK4	P11802	P11802	CDK4_HUMAN	Cyclin-dependent kinase 4	0.623548	1.73273	1.03394	0.309972
PRPS2	P11908	P21108;P11908;P60891	PRPS2_HUMAN	Ribose-phosphate pyrophosphokinase 2	-0.855978	-5.24833	5.05222	0.00855
PABPC1	P11940	P11940;Q4VXU2	PABP1_HUMAN	Polyadenylate-binding protein 1	0.112648	0.965105	0.466594	0.591573
PCNA	P12004	P12004	PCNA_HUMAN	Proliferating cell nuclear antigen	0.342084	1.8138	1.10341	0.28764
HARS1	P12081	P12081;P49590	HARS1_HUMAN	Histidine--tRNA ligase, cytoplasmic	-0.0130327	-0.128595	0.0465018	0.953093
COL6A1	P12109	P12109	CO6A1_HUMAN	Collagen alpha-1(VI) chain	-0.411895	-0.842408	0.391876	0.645604
COL6A2	P12110	P12110	CO6A2_HUMAN	Collagen alpha-2(VI) chain	-0.419708	-0.826651	0.38261	0.651805
COL6A3	P12111	P12111	CO6A3_HUMAN	Collagen alpha-3(VI) chain	-0.237962	-0.472391	0.193985	0.814707
SLC25A4	P12235	P12235	ADT1_HUMAN	ADP/ATP translocase 1	-0.669212	-3.35856	2.70157	0.0620531
SLC25A6	P12236	P12236	ADT3_HUMAN	ADP/ATP translocase 3	-0.146636	-0.700839	0.311299	0.708184
IMPDH2	P12268	P12268	IMDH2_HUMAN	Inosine-5'-monophosphate dehydrogenase 2	-0.231547	-1.19106	0.615954	0.497675
TPR	P12270	P12270	TPR_HUMAN	Nucleoprotein TPR	0.0932953	0.825989	0.382222	0.651992
PIP	P12273	P12273	PIP_HUMAN	Prolactin-inducible protein	0.308804	0.517733	0.216026	0.79265
CKB	P12277	P12277	KCRB_HUMAN	Creatine kinase B-type	-1.16067	-2.51186	1.76749	0.149791
FCGR1A	P12314	P12314	FCGR1_HUMAN	High affinity immunoglobulin gamma Fc receptor I	0.549289	2.0069	1.27564	0.241325
ANXA3	P12429	P12429	ANXA3_HUMAN	Annexin A3	-1.04669	-2.64357	1.90467	0.131409
CKMT1B	P12532	P12532	KCRU_HUMAN	Creatine kinase U-type, mitochondrial	-0.108478	-0.274091	0.10473	0.895445
BCKDHA	P12694	P12694	ODBA_HUMAN	2-oxoisovalerate dehydrogenase subunit alpha, mitochondrial	0.280617	1.43682	0.795383	0.401759
SKI	P12755	P12755	SKI_HUMAN	Ski oncogene	0.0901219	0.243654	0.0920478	0.908132
ACTN1	P12814	P12814;P35609	ACTN1_HUMAN	Alpha-actinin-1	-0.544247	-2.9627	2.2503	0.0971482
ACE	P12821	P12821	ACE_HUMAN	Angiotensin-converting enzyme	-1.2008	-3.60551	2.99354	0.0469257
MYL4	P12829	P12829	MYL4_HUMAN	Myosin light chain 4	-1.21207	-1.43292	0.7924	0.403417
CDH1	P12830	P12830	CADH1_HUMAN	Cadherin-1	-0.360134	-2.12964	1.38988	0.215589
SRC	P12931	P12931;P07947;P06241	SRC_HUMAN	Proto-oncogene tyrosine-protein kinase Src	-0.178176	-1.43919	0.797199	0.400685
PEPD	P12955	P12955	PEPD_HUMAN	Xaa-Pro dipeptidase	0.415157	1.57721	0.905576	0.356074
XRCC6	P12956	P12956	XRCC6_HUMAN	X-ray repair cross-complementing protein 6	-0.215725	-1.25147	0.658441	0.472517
XRCC5	P13010	P13010	XRCC5_HUMAN	X-ray repair cross-complementing protein 5	-0.182057	-1.15201	0.589061	0.513112
UNG	P13051	P13051	UNG_HUMAN	Uracil-DNA glycosylase	0.57371	1.46569	0.81759	0.392336
NR2C1	P13056	P13056	NR2C1_HUMAN	Nuclear receptor subfamily 2 group C member 1	-0.408511	-0.862915	0.404049	0.636153
COX4I1	P13073	P13073	COX41_HUMAN	Cytochrome c oxidase subunit 4 isoform 1, mitochondrial	-0.223644	-1.08071	0.541119	0.53906
LAMP2	P13473	P13473	LAMP2_HUMAN	Lysosome-associated membrane glycoprotein 2	0.200336	0.924308	0.441249	0.607886
RNH1	P13489	P13489	RINI_HUMAN	Ribonuclease inhibitor	-0.859669	-4.622	4.25229	0.0145217
CYBA	P13498	P13498	CY24A_HUMAN	Cytochrome b-245 light chain	0.376962	0.951529	0.458104	0.597697
NCAM1	P13591	P13591	NCAM1_HUMAN	Neural cell adhesion molecule 1	2.03963	4.39111	3.96053	0.0189845
VCAN	P13611	P13611	CSPG2_HUMAN	Versican core protein	-0.406653	-0.568228	0.241295	0.770746
EEF2	P13639	P13639	EF2_HUMAN	Elongation factor 2	-0.00930372	-0.0652603	0.0230266	0.975123
PDIA4	P13667	P13667	PDIA4_HUMAN	Protein disulfide-isomerase A4	0.293402	0.820589	0.379064	0.653798
C6	P13671	P13671	CO6_HUMAN	Complement component C6	0.359606	1.00976	0.49491	0.571462
P4HA1	P13674	P13674	P4HA1_HUMAN	Prolyl 4-hydroxylase subunit alpha-1	-0.380576	-1.73229	1.03357	0.309853
CEACAM1	P13688	P06731;P31997;P13688	CEAM1_HUMAN	Carcinoembryonic antigen-related cell adhesion molecule 1	0.537975	0.931176	0.445481	0.606228
TPT1	P13693	Q56UQ5;P13693	TCTP_HUMAN	Translationally-controlled tumor protein	-0.208992	-1.23949	0.649936	0.477092
ALAD	P13716	P13716	HEM2_HUMAN	Delta-aminolevulinic acid dehydratase	-0.415294	-2.30408	1.55826	0.182935
HLA-E	P13747	P13747	HLAE_HUMAN	HLA class I histocompatibility antigen, alpha chain E	-0.451721	-2.64052	1.90146	0.131792
LCP1	P13796	P13796	PLSL_HUMAN	Plastin-2	-0.311082	-1.07395	0.536649	0.542177
PLS3	P13797	P13797	PLST_HUMAN	Plastin-3	-0.360005	-1.8472	1.13253	0.278767
APEH	P13798	P13798	ACPH_HUMAN	Acylamino-acid-releasing enzyme	-0.207722	-0.880406	0.414532	0.628754
ETFA	P13804	P13804	ETFA_HUMAN	Electron transfer flavoprotein subunit alpha, mitochondrial	-0.122519	-0.657875	0.28804	0.727808
GYS1	P13807	P13807	GYS1_HUMAN	Glycogen [starch] synthase, muscle	-0.230933	-1.33415	0.718307	0.439478
PRKAR2A	P13861	P13861	KAP2_HUMAN	cAMP-dependent protein kinase type II-alpha regulatory subunit	-0.630389	-4.38615	3.95429	0.0190848
GTF2F2	P13984	P13984	T2FB_HUMAN	General transcription factor IIF subunit 2	0.238307	2.1769	1.43481	0.206792
CD59	P13987	P13987	CD59_HUMAN	CD59 glycoprotein	-0.433261	-1.3564	0.734754	0.430387
YJU2B	P13994	P13994	YJU2B_HUMAN	Probable splicing factor YJU2B	0.157193	0.305726	0.118197	0.883092
MTHFD2	P13995	P13995	MTDC_HUMAN	Bifunctional methylenetetrahydrofolate dehydrogenase/cyclohydrolase, mitochondrial	0.713092	1.46406	0.816333	0.393024
MIF	P14174	P14174	MIF_HUMAN	Macrophage migration inhibitory factor	0.246383	0.260884	0.0991941	0.8997
CD99	P14209	P14209	CD99_HUMAN	CD99 antigen	-0.693111	-1.28309	0.681104	0.459803
PRKCSH	P14314	P14314	GLU2B_HUMAN	Glucosidase 2 subunit beta	0.584806	2.83031	2.10476	0.111061
HCLS1	P14317	P14317	HCLS1_HUMAN	Hematopoietic lineage cell-specific protein	0.106688	0.441212	0.179183	0.826915
FDPS	P14324	P14324	FPPS_HUMAN	Farnesyl pyrophosphate synthase	0.152151	0.643406	0.280332	0.734689
TRIM27	P14373	P14373	TRI27_HUMAN	Zinc finger protein RFP	0.211428	1.73918	1.03941	0.307848
CPM	P14384	P14384	CBPM_HUMAN	Carboxypeptidase M	-0.653166	-0.706069	0.314168	0.705978
COX7A2	P14406	P14406	CX7A2_HUMAN	Cytochrome c oxidase subunit 7A2, mitochondrial	0.230329	1.05777	0.526015	0.549785
NID1	P14543	P14543	NID1_HUMAN	Nidogen-1	-0.232541	-0.769082	0.349387	0.678092
AKR1A1	P14550	P14550	AK1A1_HUMAN	Aldo-keto reductase family 1 member A1	-0.566014	-2.94445	2.23007	0.0989808
NCF1	P14598	A8MVU1;A6NI72;P14598	NCF1_HUMAN	Neutrophil cytosol factor 1	0.198042	0.882188	0.415605	0.62802
PKM	P14618	P14618	KPYM_HUMAN	Pyruvate kinase PKM	-0.399904	-2.91357	2.19595	0.102228
ACYP2	P14621	P14621	ACYP2_HUMAN	Acylphosphatase-2	0.267816	2.16176	1.42036	0.209652
HSP90B1	P14625	P14625	ENPL_HUMAN	Endoplasmin	-0.0751797	-0.305934	0.118286	0.883048
MYL6B	P14649	P14649	MYL6B_HUMAN	Myosin light chain 6B	0.121944	0.62766	0.272015	0.742116
SLC2A4	P14672	P14672	GLUT4_HUMAN	Solute carrier family 2, facilitated glucose transporter member 4	-0.041862	-0.102942	0.0368583	0.962313
SNRPB	P14678	P14678	RSMB_HUMAN	Small nuclear ribonucleoprotein-associated proteins B and B'	0.0707846	0.437677	0.177523	0.828827
IDE	P14735	P14735	IDE_HUMAN	Insulin-degrading enzyme	-0.32837	-1.87141	1.15382	0.272472
COX6B1	P14854	P14854	CX6B1_HUMAN	Cytochrome c oxidase subunit 6B1	-0.189882	-0.695134	0.308179	0.710635
POU2F1	P14859	P14859;Q9UKI9	PO2F1_HUMAN	POU domain, class 2, transcription factor 1	0.0485207	0.277427	0.106137	0.894536
HNRNPL	P14866	P14866	HNRPL_HUMAN	Heterogeneous nuclear ribonucleoprotein L	-0.262118	-1.58029	0.908057	0.355162
DARS1	P14868	P14868	SYDC_HUMAN	Aspartate--tRNA ligase, cytoplasmic	-0.0468956	-0.446706	0.18177	0.823826
JUP	P14923	P14923	PLAK_HUMAN	Junction plakoglobin	-0.667009	-5.9373	5.93547	0.00561039
UQCRB	P14927	P14927	QCR7_HUMAN	Cytochrome b-c1 complex subunit 7	0.17949	0.855313	0.399522	0.63909
BRAF	P15056	P15056	BRAF_HUMAN	Serine/threonine-protein kinase B-raf	0.069235	0.651297	0.284527	0.730471
GLUL	P15104	P15104	GLNA_HUMAN	Glutamine synthetase	-0.0910693	-0.251853	0.0954377	0.904078
AKR1B1	P15121	P15121	ALDR_HUMAN	Aldo-keto reductase family 1 member B1	-0.173831	-0.529894	0.222042	0.786618
PVR	P15151	P15151	PVR_HUMAN	Poliovirus receptor	0.446629	1.20497	0.625643	0.490991
RAC2	P15153	P15153	RAC2_HUMAN	Ras-related C3 botulinum toxin substrate 2	-0.52708	-2.16151	1.42013	0.209632
GSPT1	P15170	P15170	ERF3A_HUMAN	Eukaryotic peptide chain release factor GTP-binding subunit ERF3A	0.0614098	0.569797	0.242093	0.770255
PGAM2	P15259	P15259	PGAM2_HUMAN	Phosphoglycerate mutase 2	-0.31257	-1.09347	0.549587	0.534136
IFNGR1	P15260	P15260	INGR1_HUMAN	Interferon gamma receptor 1	-0.00306459	-0.0158096	0.00547104	0.994155
ARSA	P15289	P15289	ARSA_HUMAN	Arylsulfatase A	-1.38431	-2.25648	1.51163	0.192039
B4GALT1	P15291	P15291	B4GT1_HUMAN	Beta-1,4-galactosyltransferase 1	-0.29164	-1.35055	0.730417	0.432374
EZR	P15311	P15311	EZRI_HUMAN	Ezrin	0.134262	0.400396	0.160242	0.843519
ATP6V1B1	P15313	P15313	VATB1_HUMAN	V-type proton ATPase subunit B, kidney isoform	0.145855	0.280626	0.107488	0.892936
FOLR1	P15328	P15328	FOLR1_HUMAN	Folate receptor alpha	0.0184346	0.0625107	0.0220327	0.975988
ATF2	P15336	P15336	ATF2_HUMAN	Cyclic AMP-dependent transcription factor ATF-2	0.00138741	0.00956102	0.00330051	0.996059
UCHL3	P15374	P15374	UCHL3_HUMAN	Ubiquitin carboxyl-terminal hydrolase isozyme L3	-0.0740195	-0.511132	0.212779	0.795827
FOSL2	P15408	P15408	FOSL2_HUMAN	Fos-related antigen 2	0.193717	0.77351	0.351907	0.676203
VAV1	P15498	P15498	VAV_HUMAN	Proto-oncogene vav	0.176374	0.286542	0.109996	0.891186
CD46	P15529	P15529	MCP_HUMAN	Membrane cofactor protein	-0.297979	-0.572187	0.243308	0.769495
NME1	P15531	P15531	NDKA_HUMAN	Nucleoside diphosphate kinase A	0.090319	0.396121	0.158287	0.845383
NQO1	P15559	P15559	NQO1_HUMAN	NAD(P)H dehydrogenase [quinone] 1	-0.488495	-0.866408	0.406136	0.634144
GNS	P15586	P15586	GNS_HUMAN	N-acetylglucosamine-6-sulfatase	0.114702	0.624931	0.270581	0.74329
PHKG2	P15735	P15735	PHKG2_HUMAN	Phosphorylase b kinase gamma catalytic chain, liver/testis isoform	-0.618775	-5.72551	5.66434	0.0066087
RPS2	P15880	P15880	RS2_HUMAN	Small ribosomal subunit protein uS5	-0.246006	-1.30038	0.693616	0.452609
DSP	P15924	P15924	DESP_HUMAN	Desmoplakin	-0.547688	-4.83418	4.52224	0.0115175
RPA2	P15927	P15927	RFA2_HUMAN	Replication protein A 32 kDa subunit	-0.215927	-1.39705	0.765175	0.417043
MUC1	P15941	P15941	MUC1_HUMAN	Mucin-1	0.0012828	0.00420055	0.00144698	0.998927
COX7C	P15954	P15954	COX7C_HUMAN	Cytochrome c oxidase subunit 7C, mitochondrial	0.259274	0.89395	0.422712	0.623076
ALOX15	P16050	P16050	LOX15_HUMAN	Polyunsaturated fatty acid lipoxygenase ALOX15	-1.55494	-1.92866	1.20473	0.259152
NPR1	P16066	P16066	ANPRA_HUMAN	Atrial natriuretic peptide receptor 1	0.193375	0.637852	0.27739	0.736551
CD44	P16070	P16070	CD44_HUMAN	CD44 antigen	-1.1627	-5.07289	4.82737	0.00938776
NQO2	P16083	P16083	NQO2_HUMAN	Ribosyldihydronicotinamide dehydrogenase [quinone]	-1.49462	-3.92468	3.38045	0.0325656
ITGB4	P16144	P16144	ITB4_HUMAN	Integrin beta-4	-0.617562	-3.48879	2.85464	0.0535166
CBR1	P16152	P16152	CBR1_HUMAN	Carbonyl reductase [NADPH] 1	-0.654432	-3.25398	2.58019	0.0690068
ANK1	P16157	P16157	ANK1_HUMAN	Ankyrin-1	0.347341	0.611344	0.263476	0.750138
ACADS	P16219	P16219	ACADS_HUMAN	Short-chain specific acyl-CoA dehydrogenase, mitochondrial	-1.25321	-4.74495	4.40854	0.0124085
CREB1	P16220	P18846;P16220	CREB1_HUMAN	Cyclic AMP-responsive element-binding protein 1	0.0491043	0.397294	0.158823	0.845094
GLB1	P16278	P16278	BGAL_HUMAN	Beta-galactosidase	0.385959	2.23426	1.49004	0.196151
PPP3CB	P16298	P16298	PP2BB_HUMAN	Serine/threonine-protein phosphatase 2B catalytic subunit beta isoform	-0.1109	-1.1132	0.562778	0.525963
NCK1	P16333	P16333	NCK1_HUMAN	Cytoplasmic protein NCK1	-0.0368291	-0.402256	0.161094	0.842908
GCFC2	P16383	P16383	GCFC2_HUMAN	Intron Large complex component GCFC2	0.116712	1.09207	0.54866	0.534763
H1-5	P16401	P16401	H15_HUMAN	Histone H1.5	1.17891	3.85897	3.30001	0.0352436
EPCAM	P16422	P16422	EPCAM_HUMAN	Epithelial cell adhesion molecule	-0.599334	-3.07211	2.37272	0.085312
POR	P16435	P16435	NCPR_HUMAN	NADPH--cytochrome P450 reductase	0.246186	1.36399	0.740398	0.428954
MGMT	P16455	P16455	MGMT_HUMAN	Methylated-DNA--protein-cysteine methyltransferase	-0.308055	-1.13741	0.579126	0.518639
FER	P16591	P16591	FER_HUMAN	Tyrosine-protein kinase Fer	-0.421329	-1.22603	0.64042	0.482819
ATP2A2	P16615	P16615	AT2A2_HUMAN	Sarcoplasmic/endoplasmic reticulum calcium ATPase 2	-0.443644	-1.50861	0.851043	0.377133
PLCG2	P16885	P16885	PLCG2_HUMAN	1-phosphatidylinositol 4,5-bisphosphate phosphodiesterase gamma-2	0.237127	1.8192	1.1081	0.286277
FAH	P16930	P16930	FAAA_HUMAN	Fumarylacetoacetase	-0.610496	-1.34196	0.724064	0.435963
STMN1	P16949	P16949	STMN1_HUMAN	Stathmin	1.40301	3.60924	2.998	0.0467277
YBX3	P16989	P16989	YBOX3_HUMAN	Y-box-binding protein 3	0.12031	0.543621	0.228886	0.780556
ZNF22	P17026	P17026	ZNF22_HUMAN	Zinc finger protein 22	-0.5162	-2.00619	1.27499	0.241481
ZNF24	P17028	P17028	ZNF24_HUMAN	Zinc finger protein 24	-0.0737784	-0.756097	0.342032	0.68363
ZKSCAN1	P17029	P17029	ZKSC1_HUMAN	Zinc finger protein with KRAB and SCAN domains 1	-0.509618	-3.34204	2.6823	0.0631306
NAGA	P17050	P17050	NAGAB_HUMAN	Alpha-N-acetylgalactosaminidase	-0.340331	-1.18039	0.608563	0.502108
HSPA6	P17066	P48741;P17066	HSP76_HUMAN	Heat shock 70 kDa protein 6	-0.0877176	-0.636172	0.276501	0.737393
HMGA1	P17096	P17096	HMGA1_HUMAN	High mobility group protein HMG-I/HMG-Y	-0.108148	-0.323859	0.126047	0.875835
TMEM11	P17152	P17152	TMM11_HUMAN	Transmembrane protein 11, mitochondrial	-0.0541932	-0.418963	0.168797	0.836718
GOT1	P17174	P17174	AATC_HUMAN	Aspartate aminotransferase, cytoplasmic	-0.149419	-0.81664	0.37676	0.655615
PRKCA	P17252	P17252	KPCA_HUMAN	Protein kinase C alpha type	0.00400895	0.0190635	0.00660554	0.993189
ITGA2	P17301	P17301	ITA2_HUMAN	Integrin alpha-2	-0.662562	-2.91354	2.19592	0.102154
SMPD1	P17405	P17405	ASM_HUMAN	Sphingomyelin phosphodiesterase	-0.438625	-1.97906	1.25024	0.247435
UBTF	P17480	P17480	UBF1_HUMAN	Nucleolar transcription factor 1	0.126542	0.822812	0.380363	0.653158
HOXB6	P17509	P09630;P31267;P09067;P20719;P31274;P09629;P28356;Q00444;P17481;P31268;P31273;P17482;P17509	HXB6_HUMAN	Homeobox protein Hox-B6	-0.225155	-0.714733	0.31894	0.701506
JUND	P17535	P17535	JUND_HUMAN	Transcription factor JunD	-0.251825	-1.82539	1.11348	0.284482
CKMT2	P17540	P17540	KCRS_HUMAN	Creatine kinase S-type, mitochondrial	0.477172	1.12392	0.569998	0.522524
ATF7	P17544	P17544	ATF7_HUMAN	Cyclic AMP-dependent transcription factor ATF-7	0.181712	0.838505	0.389574	0.647799
NDUFB7	P17568	P17568	NDUB7_HUMAN	NADH dehydrogenase [ubiquinone] 1 beta subcomplex subunit 7	-0.0225964	-0.0782485	0.0277495	0.970135
PRKACA	P17612	P22694;P17612	KAPCA_HUMAN	cAMP-dependent protein kinase catalytic subunit alpha	-0.226347	-1.82661	1.11455	0.284248
CAPN2	P17655	P17655	CAN2_HUMAN	Calpain-2 catalytic subunit	-1.09103	-5.78293	5.7379	0.00622727
DES	P17661	P17661	DESM_HUMAN	Desmin	0.082659	0.11248	0.0404224	0.959
CEBPB	P17676	P17676	CEBPB_HUMAN	CCAAT/enhancer-binding protein beta	0.00299276	0.0180717	0.00625943	0.993248
HLA-G	P17693	P17693	HLAG_HUMAN	HLA class I histocompatibility antigen, alpha chain G	0.579473	1.8104	1.10047	0.288287
PTPN2	P17706	P17706	PTN2_HUMAN	Tyrosine-protein phosphatase non-receptor type 2	-0.141319	-0.975464	0.473109	0.588146
CTPS1	P17812	Q9NRF8;P17812	PYRG1_HUMAN	CTP synthase 1	0.767492	5.29391	5.11068	0.00873973
ENG	P17813	P17813	EGLN_HUMAN	Endoglin	-0.0371703	-0.0783523	0.0277874	0.97019
DDX5	P17844	P17844	DDX5_HUMAN	Probable ATP-dependent RNA helicase DDX5	0.0347161	0.176889	0.0651598	0.935183
PFKL	P17858	P08237;P17858	PFKAL_HUMAN	ATP-dependent 6-phosphofructokinase, liver type	-0.620052	-3.40769	2.75907	0.0584449
GM2A	P17900	P17900	SAP3_HUMAN	Ganglioside GM2 activator	0.266298	0.779625	0.355396	0.673123
LGALS3	P17931	P17931	LEG3_HUMAN	Galectin-3	-1.07046	-6.05918	6.09118	0.00529412
FLT1	P17948	P17948	VGFR1_HUMAN	Vascular endothelial growth factor receptor 1	0.360022	1.42025	0.78274	0.407741
PSMC3	P17980	P17980	PRS6A_HUMAN	26S proteasome regulatory subunit 6A	-0.193127	-2.03527	1.30173	0.235932
TCP1	P17987	P17987	TCPA_HUMAN	T-complex protein 1 subunit alpha	-0.178676	-1.54741	0.881732	0.364423
PTPN1	P18031	P18031	PTN1_HUMAN	Tyrosine-protein phosphatase non-receptor type 1	0.239248	1.8703	1.15283	0.272604
ERCC2	P18074	P18074	ERCC2_HUMAN	General transcription and DNA repair factor IIH helicase subunit XPD	0.088335	0.77369	0.35201	0.676162
RPL35A	P18077	P18077	RL35A_HUMAN	Large ribosomal subunit protein eL33	0.0702074	0.339373	0.132839	0.869349
ITGB5	P18084	P18084	ITB5_HUMAN	Integrin beta-5	0.294899	1.03345	0.510171	0.559868
ARF4	P18085	P18085	ARF4_HUMAN	ADP-ribosylation factor 4	0.258282	1.88843	1.16887	0.268052
RPL7	P18124	P18124	RL7_HUMAN	Large ribosomal subunit protein uL30	-0.237828	-1.14638	0.585221	0.515149
VCL	P18206	P18206	VINC_HUMAN	Vinculin	-0.0499325	-0.234157	0.088145	0.913273
LBP	P18428	P18428	LBP_HUMAN	Lipopolysaccharide-binding protein	0.202097	0.576205	0.245356	0.767159
PTPRA	P18433	P18433	PTPRA_HUMAN	Receptor-type tyrosine-protein phosphatase alpha	-0.0372448	-0.26918	0.102666	0.896917
NAT1	P18440	P18440	ARY1_HUMAN	Arylamine N-acetyltransferase 1	-0.886568	-4.36406	3.92652	0.019736
ITGB6	P18564	P18564	ITB6_HUMAN	Integrin beta-6	0.0558881	0.276849	0.105893	0.894474
SON	P18583	P18583	SON_HUMAN	Protein SON	0.0129516	0.184746	0.0682578	0.933464
NELFE	P18615	P18615	NELFE_HUMAN	Negative elongation factor E	0.089494	0.813367	0.374854	0.657172
RPL17	P18621	P18621	RL17_HUMAN	Large ribosomal subunit protein uL22	-0.411668	-1.9256	1.20199	0.25911
PGAM1	P18669	P18669	PGAM1_HUMAN	Phosphoglycerate mutase 1	-0.717314	-2.86286	2.14027	0.10723
RCC1	P18754	P18754	RCC1_HUMAN	Regulator of chromosome condensation	0.309127	1.42915	0.78952	0.404595
SDC1	P18827	P18827	SDC1_HUMAN	Syndecan-1	0.264688	0.464944	0.190423	0.816698
ATF6	P18850	P18850	ATF6A_HUMAN	Cyclic AMP-dependent transcription factor ATF-6 alpha	0.707938	4.67264	4.31657	0.0135213
LIG1	P18858	P18858	DNLI1_HUMAN	DNA ligase 1	0.130304	0.937716	0.449523	0.60313
ATP5PF	P18859	P18859	ATP5J_HUMAN	ATP synthase-coupling factor 6, mitochondrial	0.235619	1.26484	0.667987	0.467002
XRCC1	P18887	P18887	XRCC1_HUMAN	DNA repair protein XRCC1	0.100397	0.826391	0.382457	0.651915
PAM	P19021	P19021	AMD_HUMAN	Peptidyl-glycine alpha-amidating monooxygenase	0.528933	1.79702	1.0889	0.291911
CDH2	P19022	P19022	CADH2_HUMAN	Cadherin-2	0.372017	1.03861	0.513514	0.557506
GNAZ	P19086	P19086	GNAZ_HUMAN	Guanine nucleotide-binding protein G(z) subunit alpha	0.0877024	0.568011	0.241185	0.770791
PLCG1	P19174	P19174	PLCG1_HUMAN	1-phosphatidylinositol 4,5-bisphosphate phosphodiesterase gamma-1	0.427576	2.31192	1.56599	0.181091
CD58	P19256	P19256	LFA3_HUMAN	Lymphocyte function-associated antigen 3	0.678566	1.80036	1.09178	0.290775
NCL	P19338	P19338	NUCL_HUMAN	Nucleolin	0.624844	2.60444	1.86356	0.136702
HK1	P19367	P19367	HXK1_HUMAN	Hexokinase-1	-0.273703	-1.37807	0.750913	0.423916
POLR2C	P19387	P19387	RPB3_HUMAN	DNA-directed RNA polymerase II subunit RPB3	-0.0134461	-0.0936446	0.0334088	0.965388
POLR2E	P19388	P19388	RPAB1_HUMAN	DNA-directed RNA polymerases I, II, and III subunit RPABC1	0.281278	1.90736	1.18569	0.263699
NDUFV2	P19404	P19404	NDUV2_HUMAN	NADH dehydrogenase [ubiquinone] flavoprotein 2, mitochondrial	-0.365687	-3.18422	2.50005	0.0748634
ELK1	P19419	P19419	ELK1_HUMAN	ETS domain-containing protein Elk-1	-0.211236	-0.803016	0.368849	0.662053
GGT1	P19440	A6NGU5;P19440	GGT1_HUMAN	Glutathione hydrolase 1 proenzyme	0.650011	0.9265	0.442598	0.60724
ERCC3	P19447	P19447	ERCC3_HUMAN	General transcription and DNA repair factor IIH helicase subunit XPB	0.0390043	0.482616	0.198902	0.809673
TRIM21	P19474	P19474	RO52_HUMAN	E3 ubiquitin-protein ligase TRIM21	-0.34277	-3.20335	2.52196	0.0731291
EIF2AK2	P19525	P19525	E2AK2_HUMAN	Interferon-induced, double-stranded RNA-activated protein kinase	0.323819	3.00929	2.3022	0.0923783
TFE3	P19532	P19532	TFE3_HUMAN	Transcription factor E3	-0.333697	-1.37574	0.749167	0.424156
WT1	P19544	P19544	WT1_HUMAN	Wilms tumor protein	-0.273931	-0.932362	0.446213	0.605728
SRM	P19623	P19623	SPEE_HUMAN	Spermidine synthase	-0.0863197	-0.302629	0.116866	0.88444
SLC9A1	P19634	P19634	SL9A1_HUMAN	Sodium/hydrogen exchanger 1	-0.247241	-2.01134	1.27971	0.240766
ORM2	P19652	P19652	A1AG2_HUMAN	Alpha-1-acid glycoprotein 2	0.108236	0.184487	0.0681557	0.933545
CSNK2A2	P19784	P19784	CSK22_HUMAN	Casein kinase II subunit alpha'	-0.271156	-2.65857	1.92051	0.129947
RXRA	P19793	P19793	RXRA_HUMAN	Retinoic acid receptor RXR-alpha	-0.1709	-0.762335	0.345559	0.680714
ITIH2	P19823	P19823	ITIH2_HUMAN	Inter-alpha-trypsin inhibitor heavy chain H2	0.452889	1.09925	0.553441	0.531578
ITIH1	P19827	P19827	ITIH1_HUMAN	Inter-alpha-trypsin inhibitor heavy chain H1	0.233223	0.744282	0.335383	0.688621
NFKB1	P19838	P19838	NFKB1_HUMAN	Nuclear factor NF-kappa-B p105 subunit	-0.857085	-6.06033	6.09265	0.00531343
TYMP	P19971	P19971	TYPH_HUMAN	Thymidine phosphorylase	0.288453	1.1258	0.571265	0.522007
ATP2B1	P20020	P20020	AT2B1_HUMAN	Plasma membrane calcium-transporting ATPase 1	-0.199583	-1.51497	0.856046	0.374712
HLA-DPA1	P20036	P20036	DPA1_HUMAN	HLA class II histocompatibility antigen, DP alpha 1 chain	-0.509777	-0.695317	0.308278	0.710615
EIF2S2	P20042	P20042	IF2B_HUMAN	Eukaryotic translation initiation factor 2 subunit 2	0.104844	1.03083	0.508472	0.561063
ANXA7	P20073	P20073	ANXA7_HUMAN	Annexin A7	-0.401011	-3.40647	2.75764	0.0585435
TBP	P20226	Q6SJ96;P20226	TBP_HUMAN	TATA-box-binding protein	-0.158189	-0.985478	0.479438	0.582978
TPSAB1;TPSB2	P20231;Q15661	Q15661;P20231	TRYB1_HUMAN;TRYB2_HUMAN	Tryptase beta-2	-0.364734	-0.587244	0.251009	0.762126
BTF3	P20290	P20290	BTF3_HUMAN	Transcription factor BTF3	-0.475801	-2.28981	1.54423	0.18607
ALOX5AP	P20292	P20292	AL5AP_HUMAN	Arachidonate 5-lipoxygenase-activating protein	0.449461	1.41729	0.780491	0.408986
RAB4A	P20338	P20338	RAB4A_HUMAN	Ras-related protein Rab-4A	0.389527	2.96991	2.25831	0.0965917
RAB5A	P20339	P20339	RAB5A_HUMAN	Ras-related protein Rab-5A	-0.105103	-1.02859	0.507029	0.56176
RAB6A	P20340	Q9NRW1;P20340;Q9H0N0	RAB6A_HUMAN	Ras-related protein Rab-6A	0.0962785	0.687969	0.304273	0.713947
MSH3	P20585	P20585	MSH3_HUMAN	DNA mismatch repair protein Msh3	0.143634	1.49195	0.837999	0.383153
MX1	P20591	P20591	MX1_HUMAN	Interferon-induced GTP-binding protein Mx1	1.04627	2.26549	1.52042	0.190692
MX2	P20592	P20592	MX2_HUMAN	Interferon-induced GTP-binding protein Mx2	1.05545	2.28446	1.53898	0.187186
PSMB1	P20618	P20618	PSB1_HUMAN	Proteasome subunit beta type-1	-0.236683	-2.33296	1.58679	0.177453
M6PR	P20645	P20645	MPRD_HUMAN	Cation-dependent mannose-6-phosphate receptor	0.496994	3.66145	3.06063	0.0442256
H2AC7	P20671	P0C0S8;P04908;Q6FI13;P20671;Q9BTM1;Q99878;Q7L7L0;Q93077;Q16777;Q96KK5	H2A1D_HUMAN	Histone H2A type 1-D	-0.328274	-1.71388	1.01804	0.314542
COX5A	P20674	P20674	COX5A_HUMAN	Cytochrome c oxidase subunit 5A, mitochondrial	-0.130546	-0.546181	0.230168	0.780306
LMNB1	P20700	P20700	LMNB1_HUMAN	Lamin-B1	-0.0508076	-0.16296	0.059711	0.940386
ITGAX	P20702	P20702	ITAX_HUMAN	Integrin alpha-X	-0.306212	-1.08387	0.543212	0.537881
BCL3	P20749	P20749	BCL3_HUMAN	B-cell lymphoma 3 protein	0.560739	1.52914	0.86723	0.370416
OGN	P20774	P20774	MIME_HUMAN	Mimecan	-0.354336	-0.605402	0.260385	0.75367
CAST	P20810	P20810	ICAL_HUMAN	Calpastatin	-0.550929	-3.18346	2.49918	0.0748289
IMPDH1	P20839	P20839	IMDH1_HUMAN	Inosine-5'-monophosphate dehydrogenase 1	0.799556	3.09253	2.39578	0.0831134
COL5A1	P20908	P20908	CO5A1_HUMAN	Collagen alpha-1(V) chain	-0.274438	-0.310355	0.120192	0.880982
AGA	P20933	P20933	ASPG_HUMAN	N(4)-(beta-N-acetylglucosaminyl)-L-asparaginase	-0.765128	-3.39963	2.74961	0.0590833
RASA1	P20936	P20936	RASA1_HUMAN	Ras GTPase-activating protein 1	-0.0766745	-1.06837	0.532976	0.544625
PTMS	P20962	P20962	PTMS_HUMAN	Parathymosin	0.917996	2.98666	2.27695	0.0947771
CDK11B	P21127	Q9UQ88;P21127	CD11B_HUMAN	Cyclin-dependent kinase 11B	0.241019	2.46406	1.71856	0.155889
GSTM3	P21266	P21266	GSTM3_HUMAN	Glutathione S-transferase Mu 3	0.578527	1.35589	0.734376	0.430585
ATP6V1B2	P21281	P21281	VATB2_HUMAN	V-type proton ATPase subunit B, brain isoform	-0.224549	-2.2502	1.50551	0.192863
ATP6V1C1	P21283	P21283	VATC1_HUMAN	V-type proton ATPase subunit C 1	0.0724451	0.57263	0.243534	0.769263
CSRP1	P21291	P21291	CSRP1_HUMAN	Cysteine and glycine-rich protein 1	-0.574802	-2.05566	1.3206	0.231926
FLNA	P21333	P21333	FLNA_HUMAN	Filamin-A	-0.24835	-0.643094	0.280166	0.734568
NF1	P21359	P21359	NF1_HUMAN	Neurofibromin	-0.0791785	-1.22455	0.639376	0.483253
MAOA	P21397	P21397	AOFA_HUMAN	Amine oxidase [flavin-containing] A	-0.676169	-1.93344	1.20902	0.258095
ACO1	P21399	P21399	ACOHC_HUMAN	Cytoplasmic aconitate hydratase	-0.188328	-1.01153	0.49604	0.570467
NT5E	P21589	P21589	5NTD_HUMAN	5'-nucleotidase	-0.406216	-0.898075	0.425215	0.621409
TAF1	P21675	Q8IZX4;P21675	TAF1_HUMAN	Transcription initiation factor TFIID subunit 1	0.0509697	0.180926	0.0667495	0.934711
GPD1	P21695	P21695	GPDA_HUMAN	Glycerol-3-phosphate dehydrogenase [NAD(+)], cytoplasmic	0.554237	1.09123	0.548097	0.535007
EPHA1	P21709	P21709	EPHA1_HUMAN	Ephrin type-A receptor 1	0.174614	0.724842	0.324536	0.697291
MDK	P21741	P21741	MK_HUMAN	Midkine	-0.46612	-0.968163	0.468514	0.59052
VDAC1	P21796	P21796	VDAC1_HUMAN	Voltage-dependent anion-selective channel protein 1	0.260567	1.19369	0.617783	0.496512
BGN	P21810	P21810	PGS1_HUMAN	Biglycan	-0.486702	-0.818218	0.37768	0.654645
ERBB3	P21860	P21860	ERBB3_HUMAN	Receptor tyrosine-protein kinase erbB-3	-0.28663	-1.09694	0.551901	0.532471
SDHB	P21912	P21912	SDHB_HUMAN	Succinate dehydrogenase [ubiquinone] iron-sulfur subunit, mitochondrial	0.0345424	0.277075	0.105988	0.89469
CD9	P21926	P21926	CD9_HUMAN	CD9 antigen	0.711275	3.63476	3.02858	0.0454389
BCKDHB	P21953	P21953	ODBB_HUMAN	2-oxoisovalerate dehydrogenase subunit beta, mitochondrial	0.0989842	0.502447	0.208527	0.800129
COMT	P21964	P21964	COMT_HUMAN	Catechol O-methyltransferase	-0.446117	-3.42994	2.78521	0.0571828
TGM2	P21980	P21980	TGM2_HUMAN	Protein-glutamine gamma-glutamyltransferase 2	-0.442021	-0.916805	0.436641	0.611515
MMUT	P22033	P22033	MUTA_HUMAN	Methylmalonyl-CoA mutase, mitochondrial	-0.0726612	-0.548463	0.231313	0.779565
OSBP	P22059	P22059	OSBP1_HUMAN	Oxysterol-binding protein 1	-0.339844	-3.76603	3.18691	0.0399213
PCMT1	P22061	P22061	PIMT_HUMAN	Protein-L-isoaspartate(D-aspartate) O-methyltransferase	-0.00127244	-0.0101696	0.00351144	0.996153
LPO	P22079	P22079	PERL_HUMAN	Lactoperoxidase	-0.0914403	-0.427138	0.172597	0.833305
FBL	P22087	P22087	FBRL_HUMAN	rRNA 2'-O-methyltransferase fibrillarin	0.0455425	0.188219	0.0696329	0.932101
GART	P22102	P22102	PUR2_HUMAN	Trifunctional purine biosynthetic protein adenosine-3	0.0414267	0.337864	0.132176	0.870047
TNXB	P22105	P22105	TENX_HUMAN	Tenascin-X	-0.194908	-0.457824	0.187033	0.819514
CDH3	P22223	P22223	CADH3_HUMAN	Cadherin-3	0.927847	2.22521	1.48128	0.197354
PAICS	P22234	P22234	PUR6_HUMAN	Bifunctional phosphoribosylaminoimidazole carboxylase/phosphoribosylaminoimidazole succinocarboxamide synthetase	0.0511533	0.212349	0.0792816	0.921976
IDS	P22304	P22304	IDS_HUMAN	Iduronate 2-sulfatase	-0.232767	-1.15414	0.590519	0.512043
SCP2	P22307	P22307	SCP2_HUMAN	Sterol carrier protein 2	-0.208373	-1.48	0.828689	0.387355
UBA1	P22314	P22314	UBA1_HUMAN	Ubiquitin-like modifier-activating enzyme 1	-0.382484	-2.34169	1.59546	0.176013
GPX3	P22352	P22352	GPX3_HUMAN	Glutathione peroxidase 3	0.109227	0.306709	0.11862	0.882568
NME2	P22392	O60361;P22392	NDKB_HUMAN	Nucleoside diphosphate kinase B	-0.153436	-0.524385	0.219311	0.789334
FDXR	P22570	P22570	ADRO_HUMAN	NADPH:adrenodoxin oxidoreductase, mitochondrial	-1.15437	-3.41984	2.77334	0.0575484
HNRNPA2B1	P22626	P22626	ROA2_HUMAN	Heterogeneous nuclear ribonucleoproteins A2/B1	-0.245934	-1.87118	1.15361	0.272493
RFX1	P22670	P22670;P48378;P48380	RFX1_HUMAN	MHC class II regulatory factor RFX1	0.0937712	0.880669	0.414691	0.628796
CBL	P22681	P22681	CBL_HUMAN	E3 ubiquitin-protein ligase CBL	0.204071	2.22766	1.48364	0.197172
PRKACB	P22694	P22694	KAPCB_HUMAN	cAMP-dependent protein kinase catalytic subunit beta	-0.299088	-0.891284	0.421098	0.623824
UQCRC2	P22695	P22695	QCR2_HUMAN	Cytochrome b-c1 complex subunit 2, mitochondrial	0.036749	0.166806	0.06121	0.939265
TGM1	P22735	P22735	TGM1_HUMAN	Protein-glutamine gamma-glutamyltransferase K	-0.413688	-0.805274	0.370156	0.660931
CPN2	P22792	P22792	CPN2_HUMAN	Carboxypeptidase N subunit 2	-0.0433589	-0.0843199	0.0299734	0.968686
FECH	P22830	P22830	HEMH_HUMAN	Ferrochelatase, mitochondrial	0.198393	1.09949	0.553598	0.531761
MRC1	P22897	P22897	MRC1_HUMAN	Macrophage mannose receptor 1	-0.274077	-0.5613	0.237783	0.772955
XPA	P23025	P23025	XPA_HUMAN	DNA repair protein complementing XP-A cells	-0.40834	-2.79149	2.06264	0.115208
IGHV1-2	P23083	P23083;A0A0C4DH31	HV102_HUMAN	Immunoglobulin heavy variable 1-2	0.543055	0.722268	0.323108	0.698743
CES1	P23141	P23141	EST1_HUMAN	Liver carboxylesterase 1	-0.845074	-1.35692	0.735143	0.430467
TCEA1	P23193	Q15560;P23193	TCEA1_HUMAN	Transcription elongation factor A protein 1	-0.290246	-1.95562	1.229	0.253492
PTGS1	P23219	P23219	PGH1_HUMAN	Prostaglandin G/H synthase 1	-1.21167	-3.30767	2.64233	0.0652617
ITGA6	P23229	P23229	ITA6_HUMAN	Integrin alpha-6	-0.234425	-0.925793	0.442162	0.607294
SFPQ	P23246	P23246	SFPQ_HUMAN	Splicing factor, proline- and glutamine-rich	0.198874	1.39334	0.762377	0.418492
TUBG1	P23258	P23258;Q9NRH3	TBG1_HUMAN	Tubulin gamma-1 chain	-0.469585	-3.7552	3.17378	0.040149
PPIB	P23284	P23284	PPIB_HUMAN	Peptidyl-prolyl cis-trans isomerase B	-0.173081	-0.892727	0.421971	0.623313
S100A1	P23297	P23297	S10A1_HUMAN	Protein S100-A1	1.96599	2.16686	1.42522	0.208983
ME2	P23368	P23368	MAOM_HUMAN	NAD-dependent malic enzyme, mitochondrial	0.652902	3.41967	2.77313	0.05752
WARS1	P23381	P23381	SYWC_HUMAN	Tryptophan--tRNA ligase, cytoplasmic	-0.375603	-2.00152	1.27071	0.24263
RPS3	P23396	P23396	RS3_HUMAN	Small ribosomal subunit protein uS3	-0.0933525	-0.571413	0.242914	0.770003
GCSH	P23434	P23434	GCSH_HUMAN	Glycine cleavage system H protein, mitochondrial	-0.0175071	-0.0961484	0.0343354	0.964283
RPS6KB1	P23443	P23443	KS6B1_HUMAN	Ribosomal protein S6 kinase beta-1	-0.0569548	-0.452799	0.184651	0.822684
JAK1	P23458	P23458	JAK1_HUMAN	Tyrosine-protein kinase JAK1	-0.150486	-1.27917	0.678282	0.46137
PTPRE	P23469	P23469	PTPRE_HUMAN	Receptor-type tyrosine-protein phosphatase epsilon	-1.59511	-6.05847	6.09026	0.00521739
PTPRG	P23470	P23470	PTPRG_HUMAN	Receptor-type tyrosine-protein phosphatase gamma	0.217517	0.833301	0.386511	0.649587
SP100	P23497	P23497;Q9H930	SP100_HUMAN	Nuclear autoantigen Sp-100	-0.132895	-0.742414	0.334336	0.689598
AHCY	P23526	P23526	SAHH_HUMAN	Adenosylhomocysteinase	0.0215902	0.110777	0.0397843	0.958977
CFL1	P23528	Q9Y281;P23528	COF1_HUMAN	Cofilin-1	0.0161771	0.104121	0.0372975	0.962282
EIF4B	P23588	P23588	IF4B_HUMAN	Eukaryotic translation initiation factor 4B	0.485125	4.39745	3.96851	0.0188229
F8A3	P23610	P23610	HAP40_HUMAN	40-kDa huntingtin-associated protein	-0.282651	-2.51611	1.77187	0.149387
ATP2B4	P23634	P23634;P20020	AT2B4_HUMAN	Plasma membrane calcium-transporting ATPase 4	0.0269849	0.188864	0.0698888	0.932271
DGKA	P23743	P23743	DGKA_HUMAN	Diacylglycerol kinase alpha	-0.331699	-1.59755	0.921992	0.349225
CPT2	P23786	P23786	CPT2_HUMAN	Carnitine O-palmitoyltransferase 2, mitochondrial	0.377842	1.59826	0.922566	0.349119
DTYMK	P23919	P23919	KTHY_HUMAN	Thymidylate kinase	0.823814	7.99839	8.50082	0.003
RRM1	P23921	P23921	RIR1_HUMAN	Ribonucleoside-diphosphate reductase large subunit	-0.215501	-1.49408	0.839661	0.382423
LAMA2	P24043	P24043	LAMA2_HUMAN	Laminin subunit alpha-2	-0.412298	-1.12578	0.571254	0.521909
PRTN3	P24158	P24158	PRTN3_HUMAN	Myeloblastin	0.979778	1.90369	1.18242	0.264302
GPT	P24298	P24298	ALAT1_HUMAN	Alanine aminotransferase 1	-0.577918	-1.00926	0.49459	0.571525
COX7B	P24311	P24311	COX7B_HUMAN	Cytochrome c oxidase subunit 7B, mitochondrial	-0.721553	-1.07861	0.539727	0.539982
CHM	P24386	P24386	RAE1_HUMAN	Rab proteins geranylgeranyltransferase component A 1	-0.395696	-4.04111	3.52381	0.0292969
NR2F2	P24468	P10589;P24468	COT2_HUMAN	COUP transcription factor 2	0.225201	1.00086	0.489218	0.575894
EEF1B2	P24534	P24534	EF1B_HUMAN	Elongation factor 1-beta	-0.0243973	-0.140107	0.0508898	0.949019
ATP5PB	P24539	P24539	AT5F1_HUMAN	ATP synthase F(0) complex subunit B1, mitochondrial	0.108304	0.789404	0.361001	0.668678
TBXAS1	P24557	P24557	THAS_HUMAN	Thromboxane-A synthase	0.187339	1.11141	0.561581	0.526309
ACP1	P24666	P24666	PPAC_HUMAN	Low molecular weight phosphotyrosine protein phosphatase	-0.0976531	-0.547812	0.230987	0.779725
PRKCH	P24723	P24723	KPCL_HUMAN	Protein kinase C eta type	-0.227841	-1.13082	0.574656	0.519612
ACAT1	P24752	P24752	THIL_HUMAN	Acetyl-CoA acetyltransferase, mitochondrial	0.334878	1.83954	1.12583	0.280585
TNC	P24821	P24821	TENA_HUMAN	Tenascin	-0.440908	-0.827063	0.382851	0.65161
MYL9	P24844	P24844	MYL9_HUMAN	Myosin regulatory light polypeptide 9	-0.291858	-1.86815	1.15093	0.273126
POLR2A	P24928	P24928	RPB1_HUMAN	DNA-directed RNA polymerase II subunit RPB1	0.0869602	1.1182	0.56614	0.524637
CDK2	P24941	P24941;Q00526	CDK2_HUMAN	Cyclin-dependent kinase 2	0.792191	3.35267	2.69469	0.0621914
APC	P25054	P25054	APC_HUMAN	Adenomatous polyposis coli protein	-0.166182	-1.41497	0.778728	0.409878
GRK2	P25098	P25098	ARBK1_HUMAN	Beta-adrenergic receptor kinase 1	0.0604183	0.744999	0.335785	0.688311
MCM3	P25205	P25205	MCM3_HUMAN	DNA replication licensing factor MCM3	1.54148	4.32036	3.87165	0.0208157
NFYB	P25208	P25208	NFYB_HUMAN	Nuclear transcription factor Y subunit beta	-0.1685	-0.758237	0.343241	0.682754
AZGP1	P25311	P25311	ZA2G_HUMAN	Zinc-alpha-2-glycoprotein	0.186345	0.525676	0.21995	0.78867
MPST	P25325	P25325	THTM_HUMAN	3-mercaptopyruvate sulfurtransferase	-0.655681	-4.56632	4.18172	0.0158675
RPS12	P25398	P25398	RS12_HUMAN	Small ribosomal subunit protein eS12	-0.695631	-2.95955	2.24681	0.0975888
BRD2	P25440	P25440	BRD2_HUMAN	Bromodomain-containing protein 2	0.0848808	1.29919	0.692752	0.453026
FAS	P25445	P25445	TNR6_HUMAN	Tumor necrosis factor receptor superfamily member 6	-0.423157	-2.73521	2.00207	0.120224
YY1	P25490	P25490	TYY1_HUMAN	Transcriptional repressor protein YY1	-0.121428	-0.596601	0.255828	0.757409
DNAJB1	P25685	Q9UDY4;P25685	DNJB1_HUMAN	DnaJ homolog subfamily B member 1	0.119909	0.885316	0.417491	0.626302
DNAJB2	P25686	Q8NHS0;P25686;O75190	DNJB2_HUMAN	DnaJ homolog subfamily B member 2	-0.18485	-0.755426	0.341653	0.683818
ATP5F1A	P25705	P25705	ATPA_HUMAN	ATP synthase subunit alpha, mitochondrial	0.234238	1.72608	1.02832	0.311549
CTSS	P25774	P25774	CATS_HUMAN	Cathepsin S	-0.231216	-0.80445	0.369679	0.661295
PSMA1	P25786	P25786	PSA1_HUMAN	Proteasome subunit alpha type-1	-0.14017	-1.21677	0.633912	0.485875
PSMA2	P25787	P25787	PSA2_HUMAN	Proteasome subunit alpha type-2	-0.325329	-2.736	2.00291	0.120128
PSMA3	P25788	P25788	PSA3_HUMAN	Proteasome subunit alpha type-3	-0.283074	-2.17287	1.43096	0.207437
PSMA4	P25789	P25789	PSA4_HUMAN	Proteasome subunit alpha type-4	-0.199442	-1.57505	0.903836	0.356953
NFKBIA	P25963	P25963	IKBA_HUMAN	NF-kappa-B inhibitor alpha	-0.300756	-2.01857	1.28635	0.239498
ITGA3	P26006	P26006	ITA3_HUMAN	Integrin alpha-3	-0.426564	-2.46697	1.72153	0.155466
ITGB8	P26012	P26012	ITB8_HUMAN	Integrin beta-8	0.867925	2.82571	2.09976	0.111162
MSN	P26038	P15311;P35241;P26038	MOES_HUMAN	Moesin	-0.329259	-2.73243	1.99909	0.120647
PTPN3	P26045	P26045	PTN3_HUMAN	Tyrosine-protein phosphatase non-receptor type 3	-0.341722	-2.80583	2.07818	0.113492
DDX6	P26196	P26196	DDX6_HUMAN	Probable ATP-dependent RNA helicase DDX6	0.0579725	0.462378	0.1892	0.817505
CTNNA2	P26232	P26232	CTNA2_HUMAN	Catenin alpha-2	-0.417441	-2.0271	1.2942	0.237665
DNMT1	P26358	P26358	DNMT1_HUMAN	DNA (cytosine-5)-methyltransferase 1	0.725657	3.98404	3.4534	0.0309051
U2AF2	P26368	P26368	U2AF2_HUMAN	Splicing factor U2AF 65 kDa subunit	0.0085744	0.050693	0.017785	0.981387
RPL13	P26373	P26373	RL13_HUMAN	Large ribosomal subunit protein eL13	-0.350078	-1.85233	1.13702	0.277502
CHML	P26374	P26374	RAE2_HUMAN	Rab proteins geranylgeranyltransferase component A 2	0.312748	0.947935	0.455866	0.59917
IVD	P26440	P26440	IVD_HUMAN	Isovaleryl-CoA dehydrogenase, mitochondrial	-0.458266	-2.52672	1.7828	0.14757
S100A4	P26447	P26447	S10A4_HUMAN	Protein S100-A4	1.56858	4.46259	4.05059	0.0175758
MGAT1	P26572	P26572	MGAT1_HUMAN	Alpha-1,3-mannosyl-glycoprotein 2-beta-N-acetylglucosaminyltransferase	0.554692	2.27533	1.53004	0.188787
HMGB2	P26583	P26583	HMGB2_HUMAN	High mobility group protein B2	-0.394189	-1.55737	0.889676	0.362008
PTBP1	P26599	P26599	PTBP1_HUMAN	Polypyrimidine tract-binding protein 1	-0.29207	-1.95943	1.23244	0.252641
TARS1	P26639	P26639;A2RTX5	SYTC_HUMAN	Threonine--tRNA ligase 1, cytoplasmic	0.0250876	0.190461	0.0705224	0.931989
VARS1	P26640	P26640	SYVC_HUMAN	Valine--tRNA ligase	0.245253	1.96073	1.23361	0.252301
EEF1G	P26641	P26641	EF1G_HUMAN	Elongation factor 1-gamma	0.0554944	0.432249	0.174982	0.83124
FKBP2	P26885	P26885	FKBP2_HUMAN	Peptidyl-prolyl cis-trans isomerase FKBP2	-0.400846	-1.55806	0.890225	0.362155
STOM	P27105	P27105	STOM_HUMAN	Stomatin	-0.0817284	-0.217085	0.0811948	0.919849
AK4	P27144	P27144;A0A8I5KW96	KAD4_HUMAN	Adenylate kinase 4, mitochondrial	0.415902	1.51828	0.858652	0.374219
PON1	P27169	P27169	PON1_HUMAN	Serum paraoxonase/arylesterase 1	0.808363	1.6207	0.940814	0.341892
ANXA13	P27216	P27216	ANX13_HUMAN	Annexin A13	-1.3628	-1.93583	1.21116	0.257528
MAOB	P27338	P27338	AOFB_HUMAN	Amine oxidase [flavin-containing] B	-0.987159	-2.74634	2.014	0.119188
YWHAQ	P27348	P27348	1433T_HUMAN	14-3-3 protein theta	-0.0880476	-0.512778	0.213588	0.795393
MAPK3	P27361	P27361	MK03_HUMAN	Mitogen-activated protein kinase 3	-0.255972	-1.65827	0.971672	0.332321
MARK3	P27448	P27448	MARK3_HUMAN	MAP/microtubule affinity-regulating kinase 3	-0.209099	-1.87051	1.15302	0.272598
DPP4	P27487	P27487	DPP4_HUMAN	Dipeptidyl peptidase 4	-0.804271	-0.941812	0.452062	0.60101
ARNT	P27540	P27540	ARNT_HUMAN	Aryl hydrocarbon receptor nuclear translocator	-0.071384	-0.565982	0.240155	0.771768
RPL10	P27635	P27635	RL10_HUMAN	Large ribosomal subunit protein uL16	-0.298159	-1.54439	0.879323	0.365391
RPA1	P27694	P27694	RFA1_HUMAN	Replication protein A 70 kDa DNA-binding subunit	-0.039688	-0.269796	0.102925	0.897169
APEX1	P27695	P27695	APEX1_HUMAN	DNA-(apurinic or apyrimidinic site) endonuclease	-0.0797211	-0.36103	0.14244	0.859215
CD82	P27701	P27701	CD82_HUMAN	CD82 antigen	-0.586417	-1.87662	1.15841	0.270653
DCK	P27707	P27707	DCK_HUMAN	Deoxycytidine kinase	0.511065	2.64436	1.90551	0.131488
CAD	P27708	P27708	PYR1_HUMAN	CAD protein	0.650614	2.5298	1.78597	0.14752
CALR	P27797	P27797	CALR_HUMAN	Calreticulin	0.147811	0.545267	0.22971	0.780156
MAP4	P27816	P27816	MAP4_HUMAN	Microtubule-associated protein 4	-0.29116	-2.11234	1.37356	0.219482
CANX	P27824	P27824	CALX_HUMAN	Calnexin	-0.25469	-1.38331	0.754839	0.421666
PIK3R1	P27986	P27986	P85A_HUMAN	Phosphatidylinositol 3-kinase regulatory subunit alpha	-0.023011	-0.213657	0.0798091	0.921347
ITPKB	P27987	P27987	IP3KB_HUMAN	Inositol-trisphosphate 3-kinase B	-0.0684912	-0.585957	0.250348	0.762378
PSMB8	P28062	P28062	PSB8_HUMAN	Proteasome subunit beta type-8	-0.597754	-2.8003	2.07218	0.113973
PSMB9	P28065	P28065	PSB9_HUMAN	Proteasome subunit beta type-9	-0.206787	-0.867606	0.406852	0.633459
PSMA5	P28066	P28066	PSA5_HUMAN	Proteasome subunit alpha type-5	-0.101297	-0.718774	0.321173	0.6999
HLA-DMA	P28067	P28067	DMA_HUMAN	HLA class II histocompatibility antigen, DM alpha chain	-0.450891	-1.08665	0.545053	0.53688
HLA-DMB	P28068	P28068	DMB_HUMAN	HLA class II histocompatibility antigen, DM beta chain	-0.346369	-0.985185	0.479252	0.583065
PSMB4	P28070	P28070	PSB4_HUMAN	Proteasome subunit beta type-4	-0.268854	-2.04605	1.31169	0.234076
PSMB6	P28072	P28072	PSB6_HUMAN	Proteasome subunit beta type-6	-0.218781	-0.985947	0.479735	0.583078
PSMB5	P28074	P28074	PSB5_HUMAN	Proteasome subunit beta type-5	-0.118127	-0.530543	0.222364	0.786228
GSTM2	P28161	Q03013;P09488;P28161	GSTM2_HUMAN	Glutathione S-transferase Mu 2	0.485616	1.20138	0.623138	0.492728
ABCD3	P28288	P28288	ABCD3_HUMAN	ATP-binding cassette sub-family D member 3	0.119639	0.492338	0.203606	0.80509
TMOD1	P28289	P28289	TMOD1_HUMAN	Tropomodulin-1	-0.251172	-1.35586	0.734354	0.430498
ITPRID2	P28290	P28290	ITPI2_HUMAN	Protein ITPRID2	-0.0618886	-0.344425	0.135067	0.86626
NDUFS1	P28331	P28331	NDUS1_HUMAN	NADH-ubiquinone oxidoreductase 75 kDa subunit, mitochondrial	-0.367959	-3.48311	2.84792	0.0538726
POLD1	P28340	P28340	DPOD1_HUMAN	DNA polymerase delta catalytic subunit	0.264528	1.87892	1.16045	0.27008
TEAD1	P28347	Q15562;Q15561;Q99594;P28347	TEAD1_HUMAN	Transcriptional enhancer factor TEF-1	0.198297	0.702409	0.31216	0.707544
SMARCA1	P28370	P28370	SMCA1_HUMAN	Probable global transcription activator SNF2L1	0.139617	1.17614	0.605629	0.503456
MAPK1	P28482	P28482	MK01_HUMAN	Mitogen-activated protein kinase 1	-0.000643865	-0.00464669	0.00160095	0.998871
GCA	P28676	P28676	GRAN_HUMAN	Grancalcin	-0.128633	-0.680065	0.299983	0.716801
RXRB	P28702	P28702;P48443;P19793	RXRB_HUMAN	Retinoic acid receptor RXR-beta	0.106543	1.0991	0.553343	0.531567
ERCC5	P28715	P28715	ERCC5_HUMAN	DNA excision repair protein ERCC-5	-0.0770947	-1.13216	0.575566	0.519499
GRN	P28799	P28799	GRN_HUMAN	Progranulin	1.14219	4.17465	3.68952	0.0253038
PTPRM	P28827	P28827	PTPRM_HUMAN	Receptor-type tyrosine-protein phosphatase mu	-0.506872	-3.57454	2.95654	0.0485896
LAP3	P28838	P28838	AMPL_HUMAN	Cytosol aminopeptidase	-0.326092	-1.66753	0.979335	0.329912
CD38	P28907	P28907	CD38_HUMAN	ADP-ribosyl cyclase/cyclic ADP-ribose hydrolase 1	-0.766439	-1.64714	0.962492	0.334989
GTF2E1	P29083	P29083	T2EA_HUMAN	General transcription factor IIE subunit 1	0.0553929	0.374602	0.148526	0.854635
GTF2E2	P29084	P29084	T2EB_HUMAN	Transcription initiation factor IIE subunit beta	0.110964	0.755453	0.341668	0.68391
TPP2	P29144	P29144	TPP2_HUMAN	Tripeptidyl-peptidase 2	-0.328207	-2.11713	1.37807	0.218404
IMPA1	P29218	P29218	IMPA1_HUMAN	Inositol monophosphatase 1	-0.710691	-3.84955	3.28851	0.0355612
EPHA2	P29317	P29317	EPHA2_HUMAN	Ephrin type-A receptor 2	-0.196399	-0.810971	0.373462	0.658072
EPHB2	P29323	P29323;Q15375	EPHB2_HUMAN	Ephrin type-B receptor 2	-0.0825196	-0.110224	0.039577	0.95929
PTPN6	P29350	P29350	PTN6_HUMAN	Tyrosine-protein phosphatase non-receptor type 6	0.240424	2.16677	1.42514	0.208837
SHC1	P29353	P29353	SHC1_HUMAN	SHC-transforming protein 1	0.18201	1.99063	1.26077	0.24494
MPG	P29372	P29372	3MG_HUMAN	DNA-3-methyladenine glycosylase	-0.343626	-1.8134	1.10307	0.287738
CRABP2	P29373	P29373	RABP2_HUMAN	Cellular retinoic acid-binding protein 2	1.67708	5.49056	5.36301	0.00778947
ARID4A	P29374	P29374	ARI4A_HUMAN	AT-rich interactive domain-containing protein 4A	-0.00485234	-0.0275726	0.00958605	0.99014
KDM5A	P29375	P29375	KDM5A_HUMAN	Lysine-specific demethylase 5A	0.456537	6.05459	6.08531	0.00512676
COL4A5	P29400	P29400	CO4A5_HUMAN	Collagen alpha-5(IV) chain	-1.30107	-2.14172	1.40132	0.212915
TKT	P29401	P29401	TKT_HUMAN	Transketolase	-0.278558	-1.44213	0.799453	0.399817
CASP1	P29466	P29466	CASP1_HUMAN	Caspase-1	-0.0713415	-0.495102	0.204949	0.803904
NOS3	P29474	P29474	NOS3_HUMAN	Nitric oxide synthase 3	-0.612654	-1.32837	0.714063	0.441504
NOS1	P29475	P29475	NOS1_HUMAN	Nitric oxide synthase 1	0.270153	0.588289	0.251546	0.761547
SERPINB3	P29508	P29508	SPB3_HUMAN	Serpin B3	-0.265649	-0.320838	0.124733	0.876656
RBMS1	P29558	P29558	RBMS1_HUMAN	RNA-binding motif, single-stranded-interacting protein 1	0.0577403	0.349755	0.137425	0.863934
PML	P29590	P29590	PML_HUMAN	Protein PML	-0.11905	-0.562275	0.238276	0.772931
TYK2	P29597	P29597	TYK2_HUMAN	Non-receptor tyrosine-protein kinase TYK2	0.0678686	0.418252	0.168468	0.836726
SERPINA4	P29622	P29622	KAIN_HUMAN	Kallistatin	0.303958	0.710482	0.316596	0.703664
EEF1D	P29692	P29692	EF1D_HUMAN	Elongation factor 1-delta	0.148823	1.38082	0.752969	0.422962
OAS2	P29728	P29728	OAS2_HUMAN	2'-5'-oligoadenylate synthase 2	0.999072	2.43497	1.68901	0.160263
MARCKS	P29966	P29966	MARCS_HUMAN	Myristoylated alanine-rich C-kinase substrate	-0.493677	-1.15615	0.591892	0.511453
GNA11	P29992	P29992	GNA11_HUMAN	Guanine nucleotide-binding protein subunit alpha-11	-1.0036	-5.11823	4.88544	0.00944444
ALDH4A1	P30038	P30038	AL4A1_HUMAN	Delta-1-pyrroline-5-carboxylate dehydrogenase, mitochondrial	1.01123	3.9933	3.46481	0.0309274
PBLD	P30039	P30039	PBLD_HUMAN	Phenazine biosynthesis-like domain-containing protein	-1.15407	-2.5551	1.81215	0.143813
ERP29	P30040	P30040	ERP29_HUMAN	Endoplasmic reticulum resident protein 29	0.117943	0.487409	0.201217	0.807169
PRDX6	P30041	P30041	PRDX6_HUMAN	Peroxiredoxin-6	-0.0273062	-0.124226	0.0448465	0.954791
BLVRB	P30043	P30043	BLVRB_HUMAN	Flavin reductase (NADPH)	0.0267757	0.116157	0.0418032	0.957391
PRDX5	P30044	P30044	PRDX5_HUMAN	Peroxiredoxin-5, mitochondrial	-0.479638	-2.71193	1.97718	0.122751
DDT	P30046	A6NHG4;P30046	DOPD_HUMAN	D-dopachrome decarboxylase	-0.17247	-0.626458	0.271383	0.742937
GCHFR	P30047	P30047	GFRP_HUMAN	GTP cyclohydrolase 1 feedback regulatory protein	-0.0456744	-0.199006	0.0739257	0.928488
PRDX3	P30048	P30048	PRDX3_HUMAN	Thioredoxin-dependent peroxide reductase, mitochondrial	-0.058054	-0.380842	0.151342	0.851843
ATP5F1D	P30049	P30049	ATPD_HUMAN	ATP synthase subunit delta, mitochondrial	0.364331	2.02445	1.29175	0.238351
RPL12	P30050	P30050	RL12_HUMAN	Large ribosomal subunit protein uL11	-0.280598	-1.33083	0.715869	0.440653
ECHS1	P30084	P30084	ECHM_HUMAN	Enoyl-CoA hydratase, mitochondrial	0.0178022	0.0899663	0.0320508	0.966746
CMPK1	P30085	P30085	KCY_HUMAN	UMP-CMP kinase	-0.31213	-1.55575	0.888377	0.362314
PEBP1	P30086	P30086	PEBP1_HUMAN	Phosphatidylethanolamine-binding protein 1	-0.632971	-3.76496	3.18561	0.0398012
PDIA3	P30101	P30101	PDIA3_HUMAN	Protein disulfide-isomerase A3	0.125249	0.432005	0.174868	0.831173
PPP2R1A	P30153	P30153	2AAA_HUMAN	Serine/threonine-protein phosphatase 2A 65 kDa regulatory subunit A alpha isoform	-0.492695	-4.01189	3.48774	0.0301208
PPP2R1B	P30154	P30154	2AAB_HUMAN	Serine/threonine-protein phosphatase 2A 65 kDa regulatory subunit A beta isoform	-0.80986	-3.48437	2.84942	0.0537851
CDC27	P30260	P30260	CDC27_HUMAN	Cell division cycle protein 27 homolog	0.289786	3.36783	2.71239	0.0614047
FCER1G	P30273	P30273	FCERG_HUMAN	High affinity immunoglobulin epsilon receptor subunit gamma	0.540512	1.7966	1.08853	0.29187
WEE1	P30291	P30291	WEE1_HUMAN	Wee1-like protein kinase	-0.0736406	-0.364244	0.143876	0.85759
PPIF	P30405	P30405	PPIF_HUMAN	Peptidyl-prolyl cis-trans isomerase F, mitochondrial	0.618995	1.00669	0.492941	0.573142
NKTR	P30414	P30414	NKTR_HUMAN	NK-tumor recognition protein	0.127875	1.78083	1.07496	0.295834
NMT1	P30419	P30419	NMT1_HUMAN	Glycylpeptide N-tetradecanoyltransferase 1	-0.100612	-0.606694	0.261056	0.753153
HLA-F	P30511	P30511	HLAF_HUMAN	HLA class I histocompatibility antigen, alpha chain F	0.238128	0.721311	0.322577	0.6989
HMOX2	P30519	P30519	HMOX2_HUMAN	Heme oxygenase 2	-0.398241	-3.13527	2.44423	0.0789446
ADSS2	P30520	P30520	PURA2_HUMAN	Adenylosuccinate synthetase isozyme 2	-0.0754665	-0.85507	0.399377	0.639054
LRPAP1	P30533	P30533	AMRP_HUMAN	Alpha-2-macroglobulin receptor-associated protein	0.601889	4.72883	4.38803	0.012692
TSPO	P30536	P30536	TSPO_HUMAN	Translocator protein	0.497767	1.56015	0.89189	0.361287
ADSL	P30566	P30566	PUR8_HUMAN	Adenylosuccinate lyase	0.0650298	0.514238	0.214306	0.79459
PKLR	P30613	P30613	KPYR_HUMAN	Pyruvate kinase PKLR	-1.0917	-1.36188	0.738828	0.429601
CLIP1	P30622	P30622	CLIP1_HUMAN	CAP-Gly domain-containing linker protein 1	-0.227888	-1.93683	1.21206	0.2574
SRI	P30626	P30626	SORCN_HUMAN	Sorcin	-0.519029	-2.42203	1.67592	0.162185
GSTT1	P30711	P30711	GSTT1_HUMAN	Glutathione S-transferase theta-1	-3.07093	-3.77842	3.20194	0.0392317
SERPINB1	P30740	P30740	ILEU_HUMAN	Leukocyte elastase inhibitor	-1.14168	-4.69144	4.34047	0.0135458
SLC7A1	P30825	P30825	CTR1_HUMAN	High affinity cationic amino acid transporter 1	0.254515	0.563324	0.238807	0.772603
ALDH1B1	P30837	P30837	AL1B1_HUMAN	Aldehyde dehydrogenase X, mitochondrial	0.940148	3.09439	2.39788	0.0829411
ALDH3A1	P30838	P30838	AL3A1_HUMAN	Aldehyde dehydrogenase, dimeric NADP-preferring	-0.809036	-2.11744	1.37836	0.218384
POLR2B	P30876	P30876	RPB2_HUMAN	DNA-directed RNA polymerase II subunit RPB2	-0.0143021	-0.124251	0.0448559	0.954897
LCN1	P31025	P31025	LCN1_HUMAN	Lipocalin-1	-0.225823	-0.314864	0.122141	0.879484
SDHA	P31040	P31040	SDHA_HUMAN	Succinate dehydrogenase [ubiquinone] flavoprotein subunit, mitochondrial	-0.0730093	-0.530867	0.222525	0.78649
CORO1A	P31146	P31146	COR1A_HUMAN	Coronin-1A	-0.131798	-0.570132	0.242263	0.770257
GDI1	P31150	P31150	GDIA_HUMAN	Rab GDP dissociation inhibitor alpha	-0.587509	-3.49139	2.85772	0.0533539
S100A7	P31151	P31151	S10A7_HUMAN	Protein S100-A7	0.060453	0.078092	0.0276923	0.969978
MAT2A	P31153	P31153	METK2_HUMAN	S-adenosylmethionine synthase isoform type-2	-0.423633	-2.66034	1.92238	0.129697
PRKAR1B	P31321	P31321	KAP1_HUMAN	cAMP-dependent protein kinase type I-beta regulatory subunit	0.163598	0.740076	0.333026	0.690667
PRKAR2B	P31323	P31323	KAP3_HUMAN	cAMP-dependent protein kinase type II-beta regulatory subunit	-0.0467995	-0.208253	0.0776321	0.923509
SDC4	P31431	P31431	SDC4_HUMAN	Syndecan-4	-0.649391	-2.44073	1.69485	0.159592
TIA1	P31483	P31483	TIA1_HUMAN	Cytotoxic granule associated RNA binding protein TIA1	0.443756	3.49261	2.85917	0.0533476
FMO4	P31512	P31512	FMO4_HUMAN	Dimethylaniline monooxygenase [N-oxide-forming] 4	0.219704	0.595329	0.255172	0.75832
FMO3	P31513	P31513	FMO3_HUMAN	Flavin-containing monooxygenase 3	0.352464	0.73068	0.327781	0.694457
HIVEP2	P31629	P31629	ZEP2_HUMAN	Transcription factor HIVEP2	-0.111724	-0.453192	0.184836	0.822479
DNAJA1	P31689	P31689	DNJA1_HUMAN	DnaJ homolog subfamily A member 1	-0.548858	-2.68975	1.95356	0.125315
AKT1	P31749	P31749	AKT1_HUMAN	RAC-alpha serine/threonine-protein kinase	-0.438676	-3.77548	3.19838	0.0393678
AKT2	P31751	P31751	AKT2_HUMAN	RAC-beta serine/threonine-protein kinase	0.430898	2.90193	2.18313	0.103015
UQCRC1	P31930	P31930	QCR1_HUMAN	Cytochrome b-c1 complex subunit 1, mitochondrial	0.11765	0.706423	0.314363	0.705811
HIBADH	P31937	P31937	3HIDH_HUMAN	3-hydroxyisobutyrate dehydrogenase, mitochondrial	0.176375	0.625727	0.270999	0.743267
ATIC	P31939	P31939	PUR9_HUMAN	Bifunctional purine biosynthesis protein ATIC	0.0830952	0.4449	0.180919	0.824714
HNRNPH3	P31942	P31942	HNRH3_HUMAN	Heterogeneous nuclear ribonucleoprotein H3	-0.141605	-0.949001	0.45653	0.598721
HNRNPH1	P31943	P31943	HNRH1_HUMAN	Heterogeneous nuclear ribonucleoprotein H	0.0691868	0.426845	0.17246	0.83328
CASP14	P31944	P31944	CASPE_HUMAN	Caspase-14	0.0664527	0.145531	0.05297	0.948213
YWHAB	P31946	P31946	1433B_HUMAN	14-3-3 protein beta/alpha	-0.266683	-1.34636	0.727316	0.433959
SFN	P31947	P31947	1433S_HUMAN	14-3-3 protein sigma	-0.01063	-0.0479751	0.0168135	0.982446
STIP1	P31948	P31948	STIP1_HUMAN	Stress-induced-phosphoprotein 1	-0.281018	-1.98979	1.26001	0.245104
S100A11	P31949	P31949	S10AB_HUMAN	Protein S100-A11	-0.148411	-0.703924	0.31299	0.707095
L1CAM	P32004	P32004	L1CAM_HUMAN	Neural cell adhesion molecule L1	0.168765	0.316754	0.12296	0.879182
INPP5B	P32019	P32019	I5P2_HUMAN	Type II inositol 1,4,5-trisphosphate 5-phosphatase	0.200767	1.62119	0.941213	0.342042
PRDX2	P32119	P32119	PRDX2_HUMAN	Peroxiredoxin-2	0.27652	1.47176	0.822291	0.390343
ARRB2	P32121	P32121	ARRB2_HUMAN	Beta-arrestin-2	0.0318819	0.116645	0.0419867	0.957416
GK	P32189	P32189;Q14409	GLPK_HUMAN	Glycerol kinase	-0.509204	-1.45599	0.810107	0.39512
DCTD	P32321	P32321	DCTD_HUMAN	Deoxycytidylate deaminase	-0.426729	-1.62883	0.947458	0.339811
PYCR1	P32322	P32322	P5CR1_HUMAN	Pyrroline-5-carboxylate reductase 1, mitochondrial	1.40771	3.19873	2.51667	0.0734579
SLC8A1	P32418	P32418	NAC1_HUMAN	Sodium/calcium exchanger 1	0.130681	0.323651	0.125956	0.875864
GBP1	P32455	P32455;Q9H0R5	GBP1_HUMAN	Guanylate-binding protein 1	0.232934	1.10505	0.557316	0.529018
GBP2	P32456	P32456	GBP2_HUMAN	Guanylate-binding protein 2	-0.443432	-2.55753	1.81467	0.143706
ELF1	P32519	P32519	ELF1_HUMAN	ETS-related transcription factor Elf-1	-0.678264	-5.29898	5.11719	0.00866207
GTF2H1	P32780	P32780	TF2H1_HUMAN	General transcription factor IIH subunit 1	0.221382	1.6804	0.990029	0.325492
STX2	P32856	P32856	STX2_HUMAN	Syntaxin-2	-0.987461	-2.88424	2.16369	0.104914
CTH	P32929	P32929	CGL_HUMAN	Cystathionine gamma-lyase	-0.774092	-3.26054	2.58776	0.0685798
ICAM3	P32942	P32942	ICAM3_HUMAN	Intercellular adhesion molecule 3	0.207413	0.632863	0.274755	0.738905
RPL9P9	P32969	P32969	RL9_HUMAN	Large ribosomal subunit protein uL6	-0.342458	-1.68551	0.994279	0.324237
ACSL1	P33121	P33121	ACSL1_HUMAN	Long-chain-fatty-acid--CoA ligase 1	0.282824	1.42051	0.782939	0.407695
KIF5B	P33176	O60282;P33176;Q12840	KINH_HUMAN	Kinesin-1 heavy chain	-0.0277765	-0.207395	0.0772871	0.923652
CSTF2	P33240	Q9H0L4;P33240	CSTF2_HUMAN	Cleavage stimulation factor subunit 2	0.0998765	0.82191	0.379836	0.653227
LSP1	P33241	P33241	LSP1_HUMAN	Lymphocyte-specific protein 1	-0.00218253	-0.012216	0.00422144	0.995544
DUT	P33316	P33316	DUT_HUMAN	Deoxyuridine 5'-triphosphate nucleotidohydrolase, mitochondrial	0.0719713	0.341211	0.133649	0.868409
GUCY1A2	P33402	P33402	GCYA2_HUMAN	Guanylate cyclase soluble subunit alpha-2	-1.34393	-2.77676	2.04673	0.116292
ABCC1	P33527	P33527	MRP1_HUMAN	Multidrug resistance-associated protein 1	0.410113	2.4442	1.69837	0.159006
ABCD1	P33897	P33897	ABCD1_HUMAN	ATP-binding cassette sub-family D member 1	-0.0282664	-0.253617	0.0961698	0.903486
KDELR2	P33947	P33947	ERD22_HUMAN	ER lumen protein-retaining receptor 2	0.319262	1.88501	1.16583	0.269097
MCM4	P33991	P33991	MCM4_HUMAN	DNA replication licensing factor MCM4	1.61729	4.74695	4.41109	0.0124382
MCM5	P33992	P33992	MCM5_HUMAN	DNA replication licensing factor MCM5	1.52942	4.14352	3.65078	0.0260687
MCM7	P33993	P33993	MCM7_HUMAN	DNA replication licensing factor MCM7	1.75301	4.25976	3.79574	0.0230165
GALNS	P34059	P34059	GALNS_HUMAN	N-acetylgalactosamine-6-sulfatase	-0.535575	-2.34474	1.59848	0.175681
SHMT1	P34896	P34896	GLYC_HUMAN	Serine hydroxymethyltransferase, cytosolic	0.609353	1.12746	0.572384	0.521189
SHMT2	P34897	P34897	GLYM_HUMAN	Serine hydroxymethyltransferase, mitochondrial	0.858723	4.67817	4.32361	0.0135681
EPHX2	P34913	P34913	HYES_HUMAN	Bifunctional epoxide hydrolase 2	-1.06358	-4.02882	3.50864	0.0297452
HSPA1L	P34931	P34931	HS71L_HUMAN	Heat shock 70 kDa protein 1-like	-0.466726	-2.4402	1.69431	0.159438
HSPA4	P34932	P34932	HSP74_HUMAN	Heat shock 70 kDa protein 4	0.125796	0.946987	0.455276	0.599162
MPI	P34949	P34949	MPI_HUMAN	Mannose-6-phosphate isomerase	-0.761223	-3.13712	2.44633	0.0789515
GPC1	P35052	P35052	GPC1_HUMAN	Glypican-1	-0.522309	-1.5431	0.878298	0.365969
BTC	P35070	P35070	BTC_HUMAN	Probetacellulin	-0.0515376	-0.1664	0.0610514	0.939304
PFN2	P35080	P35080	PROF2_HUMAN	Profilin-2	-0.243034	-1.32282	0.709992	0.443477
CA8	P35219	P35219	CAH8_HUMAN	Carbonic anhydrase-related protein	0.428392	0.996662	0.486542	0.577275
CTNNA1	P35221	P35221;P26232	CTNA1_HUMAN	Catenin alpha-1	-0.173202	-1.51555	0.856506	0.374787
CTNNB1	P35222	P35222	CTNB1_HUMAN	Catenin beta-1	-0.230373	-1.79318	1.08558	0.292455
BMI1	P35226	P35226	BMI1_HUMAN	Polycomb complex protein BMI-1	0.0671496	0.184483	0.068154	0.933419
PHB1	P35232	P35232	PHB1_HUMAN	Prohibitin 1	0.866499	5.58958	5.49005	0.00737255
SERPINB6	P35237	P35237	SPB6_HUMAN	Serpin B6	-0.837737	-3.64171	3.03692	0.0451135
NF2	P35240	P35240	MERL_HUMAN	Merlin	-0.209201	-1.44255	0.799774	0.399777
RDX	P35241	P35241	RADI_HUMAN	Radixin	0.205022	1.25648	0.662013	0.470705
RPA3	P35244	P35244	RFA3_HUMAN	Replication protein A 14 kDa subunit	-0.430208	-2.71421	1.97961	0.122567
RFC4	P35249	P35249	RFC4_HUMAN	Replication factor C subunit 4	0.604105	2.654	1.91568	0.130683
RFC2	P35250	P35250	RFC2_HUMAN	Replication factor C subunit 2	0.437094	2.48068	1.73552	0.154215
RFC1	P35251	P35251	RFC1_HUMAN	Replication factor C subunit 1	0.172101	1.1325	0.575797	0.51939
RPL22	P35268	P35268	RL22_HUMAN	Large ribosomal subunit protein eL22	-0.112731	-0.569605	0.241995	0.77029
GTF2F1	P35269	P35269	T2FA_HUMAN	General transcription factor IIF subunit 1	0.162672	1.34217	0.724225	0.435932
SPR	P35270	P35270	SPRE_HUMAN	Sepiapterin reductase	-0.683509	-2.78277	2.05322	0.116029
IDUA	P35475	P35475	IDUA_HUMAN	Alpha-L-iduronidase	0.239501	1.38593	0.756808	0.420886
SAA4	P35542	P35542	SAA4_HUMAN	Serum amyloid A-4 protein	0.850629	1.62206	0.941923	0.342078
FBN1	P35555	P35555	FBN1_HUMAN	Fibrillin-1	-0.710789	-1.5906	0.916369	0.351585
IRS1	P35568	P35568	IRS1_HUMAN	Insulin receptor substrate 1	-0.847734	-3.70033	3.10745	0.0423513
AGL	P35573	P35573	GDE_HUMAN	Glycogen debranching enzyme	-0.0660532	-0.422379	0.170382	0.8352
MYH9	P35579	P35579	MYH9_HUMAN	Myosin-9	-0.149072	-1.08843	0.546236	0.535932
MYH10	P35580	P35580;Q7Z406	MYH10_HUMAN	Myosin-10	-0.273594	-1.25056	0.657792	0.472852
COPB2	P35606	P35606	COPB2_HUMAN	Coatomer subunit beta'	0.00356575	0.0225639	0.00782924	0.992018
ACTN2	P35609	P35609	ACTN2_HUMAN	Alpha-actinin-2	-0.324817	-1.61075	0.932712	0.344413
SOAT1	P35610	P35610	SOAT1_HUMAN	Sterol O-acyltransferase 1	-0.546301	-2.08089	1.34408	0.226823
ADD1	P35611	P35611	ADDA_HUMAN	Alpha-adducin	-0.482422	-3.25083	2.57656	0.0691803
ADD2	P35612	P35612	ADDB_HUMAN	Beta-adducin	-0.236655	-0.386679	0.153987	0.849619
BSG	P35613	P35613	BASI_HUMAN	Basigin	1.24396	3.72143	3.13293	0.0413314
TIMP3	P35625	P35625	TIMP3_HUMAN	Metalloproteinase inhibitor 3	0.264108	0.471491	0.193554	0.815189
GRK3	P35626	P35626	ARBK2_HUMAN	Beta-adrenergic receptor kinase 2	-1.08144	-3.01527	2.30889	0.0916172
FUS	P35637	P35637	FUS_HUMAN	RNA-binding protein FUS	0.179816	0.758773	0.343543	0.682452
NUP214	P35658	P35658	NU214_HUMAN	Nuclear pore complex protein Nup214	-0.185666	-2.39324	1.64693	0.16722
DEK	P35659	P35659	DEK_HUMAN	Protein DEK	-0.0728207	-0.42635	0.172229	0.83339
ATP7B	P35670	P35670	ATP7B_HUMAN	Copper-transporting ATPase 2	0.973738	2.56044	1.8177	0.143343
HNF1B	P35680	P35680	HNF1B_HUMAN	Hepatocyte nuclear factor 1-beta	-0.808842	-4.08298	3.57564	0.0281301
MYH11	P35749	P35749	MYH11_HUMAN	Myosin-11	0.339171	0.675478	0.297502	0.718856
GLRX	P35754	P35754	GLRX1_HUMAN	Glutaredoxin-1	0.882775	2.49178	1.74688	0.153075
PPM1A	P35813	O75688;P35813	PPM1A_HUMAN	Protein phosphatase 1A	-0.162247	-1.66615	0.978189	0.330195
IGFALS	P35858	P35858	ALS_HUMAN	Insulin-like growth factor-binding protein complex acid labile subunit	0.435324	1.05261	0.522635	0.551508
AHR	P35869	P35869	AHR_HUMAN	Aryl hydrocarbon receptor	-0.0561714	-0.432763	0.175222	0.831209
HMGCL	P35914	P35914	HMGCL_HUMAN	Hydroxymethylglutaryl-CoA lyase, mitochondrial	-0.107757	-0.561797	0.238034	0.772929
PSMC2	P35998	P35998	PRS7_HUMAN	26S proteasome regulatory subunit 7	-0.0697582	-0.66366	0.291139	0.724435
CHI3L1	P36222	P36222	CH3L1_HUMAN	Chitinase-3-like protein 1	1.09251	2.19149	1.44879	0.204024
GGT5	P36269	P36269	GGT5_HUMAN	Glutathione hydrolase 5 proenzyme	-0.664665	-1.14279	0.582777	0.516936
ARL2	P36404	P36404	ARL2_HUMAN	ADP-ribosylation factor-like protein 2	-0.281647	-2.72862	1.99501	0.120752
ARL3	P36405	P36405	ARL3_HUMAN	ADP-ribosylation factor-like protein 3	-0.606083	-3.19831	2.51619	0.0734492
TRIM23	P36406	P36406	TRI23_HUMAN	E3 ubiquitin-protein ligase TRIM23	-1.31643	-3.62887	3.02151	0.0456609
MAP2K2	P36507	P36507	MP2K2_HUMAN	Dual specificity mitogen-activated protein kinase kinase 2	0.234939	2.01938	1.28709	0.239452
ATP5F1C	P36542	P36542	ATPG_HUMAN	ATP synthase subunit gamma, mitochondrial	0.509835	2.83377	2.10853	0.110619
ATP6V1E1	P36543	P36543	VATE1_HUMAN	V-type proton ATPase subunit E 1	-0.141165	-0.738906	0.332372	0.690775
CPOX	P36551	P36551	HEM6_HUMAN	Oxygen-dependent coproporphyrinogen-III oxidase, mitochondrial	0.783318	5.11151	4.87684	0.00936957
ARR3	P36575	P36575	ARRC_HUMAN	Arrestin-C	-0.166583	-0.726289	0.325339	0.696405
RPL4	P36578	P36578	RL4_HUMAN	Large ribosomal subunit protein uL4	-0.412983	-1.8655	1.14861	0.274177
NUDT1	P36639	P36639	8ODP_HUMAN	Oxidized purine nucleoside triphosphate hydrolase	0.500598	1.21742	0.634367	0.48596
LONP1	P36776	P36776	LONM_HUMAN	Lon protease homolog, mitochondrial	0.296037	2.6453	1.90649	0.131454
PGM1	P36871	P36871	PGM1_HUMAN	Phosphoglucomutase-1	0.0970352	0.389945	0.155472	0.848877
PPP1CC	P36873	P36873	PP1G_HUMAN	Serine/threonine-protein phosphatase PP1-gamma catalytic subunit	-0.000512681	-0.00388893	0.00133947	0.998889
BMPR1A	P36894	P36894	BMR1A_HUMAN	Bone morphogenetic protein receptor type-1A	0.452081	2.42785	1.68181	0.161483
GNL1	P36915	P36915	GNL1_HUMAN	Guanine nucleotide-binding protein-like 1	0.0667384	0.581146	0.247882	0.764966
POLR2I	P36954	P36954	RPB9_HUMAN	DNA-directed RNA polymerase II subunit RPB9	0.0396522	0.122694	0.0442671	0.955199
SERPINF1	P36955	P36955	PEDF_HUMAN	Pigment epithelium-derived factor	-0.115243	-0.384862	0.153163	0.850531
DLST	P36957	P36957	ODO2_HUMAN	Dihydrolipoyllysine-residue succinyltransferase component of 2-oxoglutarate dehydrogenase complex, mitochondrial	-0.445961	-2.19443	1.45161	0.20331
GMPR	P36959	P36959	GMPR1_HUMAN	GMP reductase 1	-0.850498	-5.2177	5.01294	0.00888344
GPX4	P36969	P36969	GPX4_HUMAN	Phospholipid hydroperoxide glutathione peroxidase	-0.136114	-0.806591	0.37092	0.660018
SRP14	P37108	P37108	SRP14_HUMAN	Signal recognition particle 14 kDa protein	0.383826	1.60322	0.926586	0.34727
NUP62	P37198	P37198	NUP62_HUMAN	Nuclear pore glycoprotein p62	0.0959435	0.934221	0.447361	0.604668
HPCAL1	P37235	P37235	HPCL1_HUMAN	Hippocalcin-like protein 1	-0.181681	-1.42518	0.786492	0.405914
FDFT1	P37268	P37268	FDFT_HUMAN	Squalene synthase	0.0146839	0.0975895	0.0348695	0.964259
TAGLN2	P37802	P37802	TAGL2_HUMAN	Transgelin-2	-0.21399	-1.0743	0.53688	0.542059
TALDO1	P37837	P37837	TALDO_HUMAN	Transaldolase	-0.597214	-3.13012	2.43838	0.0794741
ETFB	P38117	P38117	ETFB_HUMAN	Electron transfer flavoprotein subunit beta	0.237097	1.51114	0.853032	0.3762
RBMX	P38159	P38159;Q96E39	RBMX_HUMAN	RNA-binding motif protein, X chromosome	-0.0319842	-0.261129	0.0992967	0.899644
COIL	P38432	P38432	COIL_HUMAN	Coilin	0.347991	3.56544	2.94568	0.0487829
GGCX	P38435	P38435	VKGC_HUMAN	Vitamin K-dependent gamma-carboxylase	0.283598	1.42183	0.783946	0.4072
LIPA	P38571	P38571	LICH_HUMAN	Lysosomal acid lipase/cholesteryl ester hydrolase	-0.530806	-1.80104	1.09237	0.290561
ATP6V1A	P38606	P38606	VATA_HUMAN	V-type proton ATPase catalytic subunit A	-0.045125	-0.249066	0.0942833	0.905219
HSPA9	P38646	P38646	GRP75_HUMAN	Stress-70 protein, mitochondrial	0.546404	4.09263	3.5876	0.0279671
EIF4A3	P38919	P38919	IF4A3_HUMAN	Eukaryotic initiation factor 4A-III	0.209922	1.39972	0.767183	0.416151
IGHMBP2	P38935	P38935	SMBP2_HUMAN	DNA-binding protein SMUBP-2	0.256675	2.55528	1.81233	0.14394
RPS19	P39019	P39019	RS19_HUMAN	Small ribosomal subunit protein eS19	-0.0681832	-0.396284	0.158361	0.845383
RPL3	P39023	P39023	RL3_HUMAN	Large ribosomal subunit protein uL3	-0.317933	-1.578	0.90621	0.356143
COL15A1	P39059	P39059	COFA1_HUMAN	Collagen alpha-1(XV) chain	-0.165192	-0.284385	0.109081	0.891709
COL18A1	P39060	P39060	COIA1_HUMAN	Collagen alpha-1(XVIII) chain	-0.28708	-0.908127	0.431334	0.615996
DDOST	P39656	P39656	OST48_HUMAN	Dolichyl-diphosphooligosaccharide--protein glycosyltransferase 48 kDa subunit	0.0610765	0.436875	0.177147	0.828809
ANP32A	P39687	P39687;O43423	AN32A_HUMAN	Acidic leucine-rich nuclear phosphoprotein 32 family member A	-0.0921442	-0.61615	0.265983	0.748278
FEN1	P39748	P39748	FEN1_HUMAN	Flap endonuclease 1	0.544989	3.05381	2.35212	0.0868609
CUX1	P39880	P39880	CUX1_HUMAN	Homeobox protein cut-like 1	0.0707793	0.828288	0.383569	0.651281
CAPG	P40121	P40121	CAPG_HUMAN	Macrophage-capping protein	-0.281128	-0.640138	0.278599	0.735191
CAP2	P40123	P40123	CAP2_HUMAN	Adenylyl cyclase-associated protein 2	-0.161243	-0.717294	0.320354	0.700571
TXLNA	P40222	P40222	TXLNA_HUMAN	Alpha-taxilin	0.0823642	0.964661	0.466316	0.591798
CCT6A	P40227	P40227	TCPZ_HUMAN	T-complex protein 1 subunit zeta	-0.0158699	-0.168957	0.06205	0.938374
PSMB10	P40306	P40306	PSB10_HUMAN	Proteasome subunit beta type-10	-0.307452	-1.2071	0.627131	0.490153
VHL	P40337	P40337	VHL_HUMAN	von Hippel-Lindau disease tumor suppressor	-0.220015	-1.07641	0.538276	0.541082
PBX1	P40424	P40424;P40425;P40426	PBX1_HUMAN	Pre-B-cell leukemia transcription factor 1	0.0591464	0.284709	0.109218	0.891733
PBX2	P40425	P40425	PBX2_HUMAN	Pre-B-cell leukemia transcription factor 2	0.325002	1.26995	0.671649	0.464977
RPL13A	P40429	Q6NVV1;P40429	RL13A_HUMAN	Large ribosomal subunit protein uL13	-0.476058	-2.38215	1.63581	0.169503
ARL1	P40616	P40616	ARL1_HUMAN	ADP-ribosylation factor-like protein 1	0.00578955	0.0326519	0.0113747	0.988749
MLH1	P40692	P40692	MLH1_HUMAN	DNA mismatch repair protein Mlh1	0.30345	3.43588	2.79221	0.0569795
STAT3	P40763	P40763	STAT3_HUMAN	Signal transducer and activator of transcription 3	-0.398649	-2.78835	2.05925	0.115587
[truncated: 5,777 more rows]
