# Supplementary material for: Spatial proteomics of ovarian cancer precursors delineates early disease changes and drug targets
Source: Mol Syst Biol. 2025 Nov 13;22(1):7–41. doi: 10.1038/s44320-025-00168-4 (PMC12759074; doi:10.1038/s44320-025-00168-4)
Supplement: Supplementary file 11 — Dataset EV5 [file 44320_2025_168_MOESM11_ESM.xlsx]

## Sheet: Legend
Dataset EV5. Pathway enrichment analysis highlighting significantly enriched biological pathways (Hallmark, Reactome, Wikipathways) based on comparison of premalignant samples and normal fallopian tube epithelium (figure 3D).

## Sheet: Dataset EV5
Column	Type	Name	Size	Score	P value	Benj. Hoch. FDR	Mean	Median
Student's T-test Test statistic p16positive_normalFTE	Hallmark	HALLMARK_MYC_TARGETS_V2	51	0.559321	5.37708e-12	2.68854e-10	1.86182	1.59368
Student's T-test Test statistic p16positive_normalFTE	Hallmark	HALLMARK_E2F_TARGETS	122	0.330564	3.52255e-10	8.80637e-09	0.991303	0.886664
Student's T-test Test statistic p16positive_normalFTE	Hallmark	HALLMARK_OXIDATIVE_PHOSPHORYLATION	177	0.157563	0.000331953	0.00553255	0.316234	0.399229
Student's T-test Test statistic p16positive_normalFTE	Hallmark	HALLMARK_APICAL_JUNCTION	110	-0.178028	0.00132335	0.0165419	-0.917497	-0.890023
Student's T-test Test statistic p16positive_normalFTE	Hallmark	HALLMARK_ESTROGEN_RESPONSE_EARLY	97	-0.178051	0.00254353	0.0254353	-0.989251	-1.10799
Student's T-test Test statistic p16positive_normalFTE	Hallmark	HALLMARK_G2M_CHECKPOINT	106	0.166345	0.00322045	0.0268371	0.490427	0.229911
Student's T-test Test statistic p16positive_normalFTE	Hallmark	HALLMARK_ESTROGEN_RESPONSE_LATE	102	-0.166977	0.00371383	0.0265274	-0.859017	-1.06652
Student's T-test Test statistic p16positive_normalFTE	Hallmark	HALLMARK_DNA_REPAIR	113	0.157966	0.00388853	0.0243033	0.321487	0.484466
Student's T-test Test statistic p16positive_normalFTE	Hallmark	HALLMARK_MYC_TARGETS_V1	187	0.112018	0.00876939	0.0487188	0.252901	0.0163585
Student's T-test Test statistic p16positive_normalFTE	Hallmark	HALLMARK_SPERMATOGENESIS	46	-0.22224	0.00924575	0.0462287	-0.993451	-1.51377
Student's T-test Test statistic p16positive_normalFTE	Reactome pathway	mRNA Splicing - Major Pathway	173	0.320662	5.08528e-13	7.55672e-10	0.799202	0.866009
Student's T-test Test statistic p16positive_normalFTE	Reactome pathway	Anchoring of the basal body to the plasma membrane	77	-0.446711	1.42562e-11	1.05924e-08	-1.67357	-2.18394
Student's T-test Test statistic p16positive_normalFTE	Reactome pathway	RNA polymerase II transcribes snRNA genes	57	0.496002	1.03446e-10	5.12401e-08	1.58502	1.40775
Student's T-test Test statistic p16positive_normalFTE	Reactome pathway	rRNA modification in the nucleus and cytosol	58	0.479519	2.95258e-10	1.09688e-07	1.43772	1.80217
Student's T-test Test statistic p16positive_normalFTE	Reactome pathway	Recruitment of mitotic centrosome proteins and complexes	61	-0.417606	1.83692e-08	5.45933e-06	-1.61589	-1.97801
Student's T-test Test statistic p16positive_normalFTE	Reactome pathway	Recruitment of NuMA to mitotic centrosomes	71	-0.362497	1.3949e-07	3.45471e-05	-1.42847	-1.87933
Student's T-test Test statistic p16positive_normalFTE	Reactome pathway	Selenocysteine synthesis	82	-0.332913	2.06277e-07	4.37896e-05	-1.29091	-1.26436
Student's T-test Test statistic p16positive_normalFTE	Reactome pathway	Intraflagellar transport	43	-0.456015	2.40878e-07	4.4743e-05	-1.6689	-1.95708
Student's T-test Test statistic p16positive_normalFTE	Reactome pathway	Mitochondrial protein import	56	0.399066	2.55672e-07	4.22143e-05	1.54311	1.42096
Student's T-test Test statistic p16positive_normalFTE	Reactome pathway	Activation of ATR in response to replication stress	22	0.626526	3.72722e-07	5.53865e-05	2.46686	2.67026
Student's T-test Test statistic p16positive_normalFTE	Reactome pathway	Peptide chain elongation	79	-0.324716	6.5872e-07	8.89871e-05	-1.25059	-1.23851
Student's T-test Test statistic p16positive_normalFTE	Reactome pathway	Formation of a pool of free 40S subunits	92	-0.300805	6.78639e-07	8.40382e-05	-1.17457	-1.19989
Student's T-test Test statistic p16positive_normalFTE	Reactome pathway	Viral mRNA Translation	80	-0.317827	9.67996e-07	0.000110649	-1.22934	-1.23086
Student's T-test Test statistic p16positive_normalFTE	Reactome pathway	Formation of RNA Pol II elongation complex	52	0.385587	1.59036e-06	0.000168805	1.00383	1.05473
Student's T-test Test statistic p16positive_normalFTE	Reactome pathway	Eukaryotic Translation Termination	84	-0.303893	1.60493e-06	0.000158995	-1.18087	-1.21493
Student's T-test Test statistic p16positive_normalFTE	Reactome pathway	RNA Polymerase II Pre-transcription Events	68	0.333726	2.08124e-06	0.000193295	0.826611	0.84541
Student's T-test Test statistic p16positive_normalFTE	Reactome pathway	AURKA Activation by TPX2	54	-0.371737	2.42087e-06	0.000211613	-1.42016	-1.96509
Student's T-test Test statistic p16positive_normalFTE	Reactome pathway	Loss of Nlp from mitotic centrosomes	54	-0.371737	2.42087e-06	0.000189338	-1.42016	-1.96509
Student's T-test Test statistic p16positive_normalFTE	Reactome pathway	Loss of proteins required for interphase microtubule organization from the centrosome	54	-0.371737	2.42087e-06	0.000199856	-1.42016	-1.96509
Student's T-test Test statistic p16positive_normalFTE	Reactome pathway	RNA Polymerase II Transcription Elongation	50	0.386025	2.44952e-06	0.000181999	1.01161	1.05473
Student's T-test Test statistic p16positive_normalFTE	Reactome pathway	Mitochondrial translation elongation	70	0.326304	2.51444e-06	0.000177926	0.900999	0.717124
Student's T-test Test statistic p16positive_normalFTE	Reactome pathway	TP53 Regulates Transcription of DNA Repair Genes	51	0.377347	3.28905e-06	0.000222161	1.05532	0.955653
Student's T-test Test statistic p16positive_normalFTE	Reactome pathway	Cleavage of Growing Transcript in the Termination Region	60	0.345664	3.84949e-06	0.000248711	0.895129	0.980216
Student's T-test Test statistic p16positive_normalFTE	Reactome pathway	mRNA 3'-end processing	54	0.362974	4.15387e-06	0.000257194	0.963108	1.07524
Student's T-test Test statistic p16positive_normalFTE	Reactome pathway	SRP-dependent cotranslational protein targeting to membrane	101	-0.263485	5.20707e-06	0.000309508	-1.07018	-1.17418
Student's T-test Test statistic p16positive_normalFTE	Reactome pathway	RNA Polymerase I Transcription Initiation	37	0.431007	5.90296e-06	0.000337377	1.26448	0.974213
Student's T-test Test statistic p16positive_normalFTE	Reactome pathway	Pink/Parkin Mediated Mitophagy	14	0.695511	6.69776e-06	0.000368625	3.00281	3.56402
Student's T-test Test statistic p16positive_normalFTE	Reactome pathway	Assembly of the pre-replicative complex	9	0.860102	7.95659e-06	0.000407707	3.55778	4.3296
Student's T-test Test statistic p16positive_normalFTE	Reactome pathway	Removal of licensing factors from origins	9	0.860102	7.95659e-06	0.000422267	3.55778	4.3296
Student's T-test Test statistic p16positive_normalFTE	Reactome pathway	Mitochondrial translation initiation	70	0.30816	8.77995e-06	0.0004349	0.797444	0.6745
Student's T-test Test statistic p16positive_normalFTE	Reactome pathway	BBSome-mediated cargo-targeting to cilium	17	-0.615046	1.14807e-05	0.000550334	-2.36658	-2.49327
Student's T-test Test statistic p16positive_normalFTE	Reactome pathway	Unwinding of DNA	7	0.945491	1.48735e-05	0.000690689	4.23727	4.37837
Student's T-test Test statistic p16positive_normalFTE	Reactome pathway	Regulation of PLK1 Activity at G2/M Transition	63	-0.313941	1.72211e-05	0.000775471	-1.20782	-1.90238
Student's T-test Test statistic p16positive_normalFTE	Reactome pathway	GTP hydrolysis and joining of the 60S ribosomal subunit	103	-0.245044	1.88085e-05	0.000822042	-0.925267	-1.17418
Student's T-test Test statistic p16positive_normalFTE	Reactome pathway	Degradation of beta-catenin by the destruction complex	59	-0.319741	2.26094e-05	0.00095993	-1.26003	-1.13071
Student's T-test Test statistic p16positive_normalFTE	Reactome pathway	Cristae formation	26	0.47894	2.41569e-05	0.000997145	1.40393	1.37986
Student's T-test Test statistic p16positive_normalFTE	Reactome pathway	L13a-mediated translational silencing of Ceruloplasmin expression	102	-0.242925	2.42997e-05	0.000975927	-0.95553	-1.1567
Student's T-test Test statistic p16positive_normalFTE	Reactome pathway	mRNA Splicing - Minor Pathway	47	0.351851	3.11234e-05	0.00121709	0.830585	0.635519
Student's T-test Test statistic p16positive_normalFTE	Reactome pathway	Regulation of Complement cascade	34	0.411111	3.43293e-05	0.00130804	0.989021	1.12974
Student's T-test Test statistic p16positive_normalFTE	Reactome pathway	HSP90 chaperone cycle for steroid hormone receptors (SHR)	44	-0.359803	3.75855e-05	0.0013963	-1.54097	-1.84582
Student's T-test Test statistic p16positive_normalFTE	Reactome pathway	Regulation of expression of SLITs and ROBOs	144	-0.19765	4.70965e-05	0.00170696	-0.741898	-1.00541
Student's T-test Test statistic p16positive_normalFTE	Reactome pathway	Switching of origins to a post-replicative state	6	0.958639	4.79646e-05	0.00169703	4.44668	4.3807
Student's T-test Test statistic p16positive_normalFTE	Reactome pathway	Nonsense Mediated Decay (NMD) independent of the Exon Junction Complex (EJC)	86	-0.253993	4.97395e-05	0.0017189	-0.99722	-1.18911
Student's T-test Test statistic p16positive_normalFTE	Reactome pathway	Defective CFTR causes cystic fibrosis	51	-0.327327	5.45437e-05	0.00184209	-1.35223	-1.03402
Student's T-test Test statistic p16positive_normalFTE	Reactome pathway	mRNA Capping	28	0.438677	5.99432e-05	0.00197946	1.1764	1.17027
Student's T-test Test statistic p16positive_normalFTE	Reactome pathway	Mitochondrial translation termination	70	0.276618	6.60077e-05	0.00213234	0.670477	0.654334
Student's T-test Test statistic p16positive_normalFTE	Reactome pathway	Generic Transcription Pathway	26	0.452426	6.64163e-05	0.00209988	1.1644	1.42508
Student's T-test Test statistic p16positive_normalFTE	Reactome pathway	Transport of Mature mRNA derived from an Intron-Containing Transcript	63	0.289082	7.56352e-05	0.00234154	0.65992	0.669371
Student's T-test Test statistic p16positive_normalFTE	Reactome pathway	Formation of the Early Elongation Complex	32	0.400475	9.02174e-05	0.00273598	1.05539	1.00367
Student's T-test Test statistic p16positive_normalFTE	Reactome pathway	Formation of the HIV-1 Early Elongation Complex	32	0.400475	9.02174e-05	0.00268126	1.05539	1.00367
Student's T-test Test statistic p16positive_normalFTE	Reactome pathway	RNA Pol II CTD phosphorylation and interaction with CE	26	0.443769	9.13625e-05	0.00266205	1.20463	1.17027
Student's T-test Test statistic p16positive_normalFTE	Reactome pathway	RNA Pol II CTD phosphorylation and interaction with CE during HIV infection	26	0.443769	9.13625e-05	0.00261086	1.20463	1.17027
Student's T-test Test statistic p16positive_normalFTE	Reactome pathway	Gap-filling DNA repair synthesis and ligation in TC-NER	52	0.313514	9.52349e-05	0.00267017	0.711155	0.703626
Student's T-test Test statistic p16positive_normalFTE	Reactome pathway	Formation of HIV elongation complex in the absence of HIV Tat	42	0.344202	0.000116698	0.00321136	0.859867	0.808284
Student's T-test Test statistic p16positive_normalFTE	Reactome pathway	Mitochondrial tRNA aminoacylation	21	0.484629	0.000122447	0.0033083	1.97772	1.92833
Student's T-test Test statistic p16positive_normalFTE	Reactome pathway	TNFR2 non-canonical NF-kB pathway	46	-0.32668	0.000130237	0.00345592	-1.36409	-1.00541
Student's T-test Test statistic p16positive_normalFTE	Reactome pathway	Activation of the pre-replicative complex	16	0.546672	0.000154757	0.00403453	2.15191	2.27217
Student's T-test Test statistic p16positive_normalFTE	Reactome pathway	Thromboxane signalling through TP receptor	10	-0.677296	0.000209666	0.00537179	-3.19487	-3.94076
Student's T-test Test statistic p16positive_normalFTE	Reactome pathway	Neddylation	134	-0.186482	0.000210261	0.00529573	-0.764229	-0.885198
Student's T-test Test statistic p16positive_normalFTE	Reactome pathway	Regulation of PTEN stability and activity	57	-0.28418	0.0002137	0.00529263	-1.10822	-1.00512
Student's T-test Test statistic p16positive_normalFTE	Reactome pathway	Formation of HIV-1 elongation complex containing HIV-1 Tat	41	0.334115	0.000219456	0.00534608	0.828221	0.708774
Student's T-test Test statistic p16positive_normalFTE	Reactome pathway	Interleukin-1 signaling	66	-0.263698	0.000220285	0.00527972	-1.08363	-0.984306
Student's T-test Test statistic p16positive_normalFTE	Reactome pathway	CLEC7A (Dectin-1) signaling	69	-0.252418	0.00030003	0.00707689	-1.03541	-0.92393
Student's T-test Test statistic p16positive_normalFTE	Reactome pathway	Hh mutants that don't undergo autocatalytic processing are degraded by ERAD	49	-0.29702	0.000331214	0.00769037	-1.16077	-1.0057
Student's T-test Test statistic p16positive_normalFTE	Reactome pathway	Tat-mediated elongation of the HIV-1 transcript	39	0.332107	0.000339625	0.00776436	0.829191	0.708774
Student's T-test Test statistic p16positive_normalFTE	Reactome pathway	Degradation of DVL	48	-0.297798	0.000367625	0.00827714	-1.15396	-1.00541
Student's T-test Test statistic p16positive_normalFTE	Reactome pathway	Vif-mediated degradation of APOBEC3G	47	-0.298946	0.000401928	0.00891439	-1.16179	-1.00512
Student's T-test Test statistic p16positive_normalFTE	Reactome pathway	Complex I biogenesis	54	-0.278591	0.000410375	0.0089679	-1.11981	-1.39639
Student's T-test Test statistic p16positive_normalFTE	Reactome pathway	tRNA processing in the nucleus	48	0.294643	0.000424185	0.00913534	0.696254	0.716464
Student's T-test Test statistic p16positive_normalFTE	Reactome pathway	Hedgehog ligand biogenesis	50	-0.287928	0.000440095	0.00934258	-1.13355	-1.00541
Student's T-test Test statistic p16positive_normalFTE	Reactome pathway	Vpu mediated degradation of CD4	44	-0.306464	0.000446761	0.00935051	-1.16852	-1.00541
Student's T-test Test statistic p16positive_normalFTE	Reactome pathway	Dual incision in TC-NER	53	0.273817	0.000580229	0.0119753	0.592727	0.53848
Student's T-test Test statistic p16positive_normalFTE	Reactome pathway	Regulation of ornithine decarboxylase (ODC)	43	-0.302735	0.000606563	0.0123473	-1.15485	-1.00512
Student's T-test Test statistic p16positive_normalFTE	Reactome pathway	Oxygen-dependent proline hydroxylation of Hypoxia-inducible Factor Alpha	52	-0.275351	0.000609398	0.0122374	-0.970359	-1.00541
Student's T-test Test statistic p16positive_normalFTE	Reactome pathway	Regulation of RUNX3 expression and activity	48	-0.28608	0.000621328	0.0123106	-1.02727	-1.00541
Student's T-test Test statistic p16positive_normalFTE	Reactome pathway	CTLA4 inhibitory signaling	17	-0.47717	0.000664732	0.0129973	-2.04826	-3.27176
Student's T-test Test statistic p16positive_normalFTE	Reactome pathway	Asymmetric localization of PCP proteins	48	-0.284004	0.000680556	0.0131338	-1.09913	-0.984306
Student's T-test Test statistic p16positive_normalFTE	Reactome pathway	RUNX1 interacts with co-factors whose precise effect on RUNX1 targets is not known	30	0.356918	0.000726787	0.0138462	1.09712	1.61417
Student's T-test Test statistic p16positive_normalFTE	Reactome pathway	G2/M Checkpoints	43	-0.298319	0.000728411	0.0137015	-1.14243	-1.00512
Student's T-test Test statistic p16positive_normalFTE	Reactome pathway	Degradation of AXIN	43	-0.298319	0.000728411	0.0135302	-1.14243	-1.00512
Student's T-test Test statistic p16positive_normalFTE	Reactome pathway	Hedgehog 'off' state	31	-0.348374	0.000800346	0.0146829	-1.35097	-1.75927
Student's T-test Test statistic p16positive_normalFTE	Reactome pathway	PI5P, PP2A and IER3 Regulate PI3K/AKT Signaling	40	-0.304628	0.000874007	0.0158387	-1.40601	-1.43572
Student's T-test Test statistic p16positive_normalFTE	Reactome pathway	Ub-specific processing proteases	120	-0.176516	0.000890536	0.0159438	-0.798131	-0.841837
Student's T-test Test statistic p16positive_normalFTE	Reactome pathway	Regulation of RAS by GAPs	56	-0.256931	0.000906717	0.0160403	-1.05477	-0.904027
Student's T-test Test statistic p16positive_normalFTE	Reactome pathway	Activation of NF-kappaB in B cells	59	-0.250187	0.000914298	0.0159841	-0.980537	-1.0057
Student's T-test Test statistic p16positive_normalFTE	Reactome pathway	Vasopressin regulates renal water homeostasis via Aquaporins	16	-0.476221	0.000981599	0.0169611	-2.04069	-2.08378
Student's T-test Test statistic p16positive_normalFTE	Reactome pathway	Dectin-1 mediated noncanonical NF-kB signaling	52	-0.264176	0.00100797	0.0172166	-0.988458	-0.984306
Student's T-test Test statistic p16positive_normalFTE	Reactome pathway	Transcriptional regulation of white adipocyte differentiation	51	0.264955	0.00108951	0.0183978	0.580055	0.776762
Student's T-test Test statistic p16positive_normalFTE	Reactome pathway	Formation of ATP by chemiosmotic coupling	14	0.504188	0.00109713	0.0183184	1.2955	1.35795
Student's T-test Test statistic p16positive_normalFTE	Reactome pathway	GLI3 is processed to GLI3R by the proteasome	50	-0.267081	0.00111288	0.018173	-1.01553	-0.984306
Student's T-test Test statistic p16positive_normalFTE	Reactome pathway	Degradation of GLI2 by the proteasome	50	-0.267081	0.00111288	0.018375	-1.01553	-0.984306
Student's T-test Test statistic p16positive_normalFTE	Reactome pathway	NIK-->noncanonical NF-kB signaling	51	-0.264366	0.00111778	0.0180545	-0.989899	-1.00512
Student's T-test Test statistic p16positive_normalFTE	Reactome pathway	RNA Polymerase II Promoter Escape	39	0.302005	0.00112095	0.0171725	0.671777	0.581567
Student's T-test Test statistic p16positive_normalFTE	Reactome pathway	Transcription of the HIV genome	39	0.302005	0.00112095	0.0168256	0.671777	0.581567
Student's T-test Test statistic p16positive_normalFTE	Reactome pathway	RNA Polymerase II Transcription Pre-Initiation And Promoter Opening	39	0.302005	0.00112095	0.0169973	0.671777	0.581567
Student's T-test Test statistic p16positive_normalFTE	Reactome pathway	RNA Polymerase II Transcription Initiation And Promoter Clearance	39	0.302005	0.00112095	0.017534	0.671777	0.581567
Student's T-test Test statistic p16positive_normalFTE	Reactome pathway	HIV Transcription Initiation	39	0.302005	0.00112095	0.0173514	0.671777	0.581567
Student's T-test Test statistic p16positive_normalFTE	Reactome pathway	RNA Polymerase II HIV Promoter Escape	39	0.302005	0.00112095	0.0177206	0.671777	0.581567
Student's T-test Test statistic p16positive_normalFTE	Reactome pathway	RNA Polymerase II Transcription Initiation	39	0.302005	0.00112095	0.0179111	0.671777	0.581567
Student's T-test Test statistic p16positive_normalFTE	Reactome pathway	Regulation of RUNX2 expression and activity	54	-0.256679	0.00113229	0.0168258	-0.964901	-1.01986
Student's T-test Test statistic p16positive_normalFTE	Reactome pathway	RNA Polymerase I Promoter Escape	23	0.391428	0.00116866	0.0171943	0.91924	0.955653
Student's T-test Test statistic p16positive_normalFTE	Reactome pathway	AUF1 (hnRNP D0) binds and destabilizes mRNA	48	-0.270388	0.00121889	0.0177576	-1.02293	-0.984306
Student's T-test Test statistic p16positive_normalFTE	Reactome pathway	Degradation of GLI1 by the proteasome	50	-0.264161	0.0012612	0.0181956	-0.997003	-0.984306
Student's T-test Test statistic p16positive_normalFTE	Reactome pathway	Autodegradation of the E3 ubiquitin ligase COP1	44	-0.281229	0.00127427	0.0182073	-1.09316	-0.984306
Student's T-test Test statistic p16positive_normalFTE	Reactome pathway	SCF-beta-TrCP mediated degradation of Emi1	45	-0.278005	0.00127942	0.0181068	-1.03522	-1.00512
Student's T-test Test statistic p16positive_normalFTE	Reactome pathway	Abortive elongation of HIV-1 transcript in the absence of Tat	23	0.387737	0.00130075	0.0182351	1.06031	1.0517
Student's T-test Test statistic p16positive_normalFTE	Reactome pathway	ABC-family proteins mediated transport	59	-0.241712	0.00135843	0.0188657	-1.05489	-0.963492
Student's T-test Test statistic p16positive_normalFTE	Reactome pathway	MHC class II antigen presentation	89	-0.196438	0.00141688	0.0194953	-0.989144	-0.712854
Student's T-test Test statistic p16positive_normalFTE	Reactome pathway	Regulation of activated PAK-2p34 by proteasome mediated degradation	44	-0.278383	0.0014271	0.0194557	-1.08376	-0.984306
Student's T-test Test statistic p16positive_normalFTE	Reactome pathway	Negative regulation of MAPK pathway	24	-0.373919	0.00153646	0.0207562	-1.741	-1.66913
Student's T-test Test statistic p16positive_normalFTE	Reactome pathway	Ubiquitin-dependent degradation of Cyclin D1	44	-0.276173	0.0015573	0.0208482	-1.07569	-0.984306
Student's T-test Test statistic p16positive_normalFTE	Reactome pathway	Cooperation of PDCL (PhLP1) and TRiC/CCT in G-protein beta folding	25	-0.364759	0.0016126	0.0213958	-1.51928	-1.46212
Student's T-test Test statistic p16positive_normalFTE	Reactome pathway	Integration of energy metabolism	5	-0.812149	0.00166526	0.0218989	-3.37415	-3.65448
Student's T-test Test statistic p16positive_normalFTE	Reactome pathway	PP2A-mediated dephosphorylation of key metabolic factors	5	-0.812149	0.00166526	0.0217068	-3.37415	-3.65448
Student's T-test Test statistic p16positive_normalFTE	Reactome pathway	PPARA activates gene expression	64	0.226782	0.00175267	0.0226475	0.497717	0.528672
Student's T-test Test statistic p16positive_normalFTE	Reactome pathway	Polymerase switching	11	0.544869	0.00176229	0.0223826	1.5783	1.91784
Student's T-test Test statistic p16positive_normalFTE	Reactome pathway	Polymerase switching on the C-strand of the telomere	11	0.544869	0.00176229	0.0225755	1.5783	1.91784
Student's T-test Test statistic p16positive_normalFTE	Reactome pathway	Regulation of TP53 Activity through Acetylation	20	0.403443	0.0018034	0.0227107	1.22382	1.35569
Student's T-test Test statistic p16positive_normalFTE	Reactome pathway	CDK-mediated phosphorylation and removal of Cdc6	44	-0.270834	0.00191809	0.023952	-1.03762	-0.984306
Student's T-test Test statistic p16positive_normalFTE	Reactome pathway	Cross-presentation of soluble exogenous antigens (endosomes)	45	-0.267546	0.00193913	0.0240129	-1.04706	-0.963492
Student's T-test Test statistic p16positive_normalFTE	Reactome pathway	Processing of Intronless Pre-mRNAs	19	0.409612	0.00201156	0.024704	1.08049	1.01719
Student's T-test Test statistic p16positive_normalFTE	Reactome pathway	RUNX1 regulates transcription of genes involved in differentiation of HSCs	63	-0.225478	0.00202166	0.0246245	-0.904179	-1.00512
Student's T-test Test statistic p16positive_normalFTE	Reactome pathway	ADP signalling through P2Y purinoceptor 1	11	-0.536696	0.00206511	0.0249492	-2.55829	-2.42865
Student's T-test Test statistic p16positive_normalFTE	Reactome pathway	Transcriptional Regulation by E2F6	22	0.37936	0.0020883	0.025026	0.999415	0.796579
Student's T-test Test statistic p16positive_normalFTE	Reactome pathway	RNA Polymerase III Transcription Initiation From Type 2 Promoter	21	0.388088	0.002098	0.0249411	0.962901	1.12627
Student's T-test Test statistic p16positive_normalFTE	Reactome pathway	RNA Polymerase III Transcription Initiation From Type 1 Promoter	21	0.388088	0.002098	0.0247431	0.962901	1.12627
Student's T-test Test statistic p16positive_normalFTE	Reactome pathway	Initial triggering of complement	13	0.492141	0.00213591	0.0249919	1.26285	1.31286
Student's T-test Test statistic p16positive_normalFTE	Reactome pathway	Disassembly of the destruction complex and recruitment of AXIN to the membrane	18	-0.416427	0.00224043	0.02601	-1.81714	-1.64348
Student's T-test Test statistic p16positive_normalFTE	Reactome pathway	Hedgehog 'on' state	50	-0.250045	0.00227051	0.0261549	-0.995162	-0.941381
Student's T-test Test statistic p16positive_normalFTE	Reactome pathway	HIV elongation arrest and recovery	31	0.316366	0.00232962	0.0264261	0.810014	0.522952
Student's T-test Test statistic p16positive_normalFTE	Reactome pathway	Pausing and recovery of HIV elongation	31	0.316366	0.00232962	0.0266294	0.810014	0.522952
Student's T-test Test statistic p16positive_normalFTE	Reactome pathway	Presynaptic phase of homologous DNA pairing and strand exchange	20	0.393308	0.00234676	0.0264188	1.25734	1.04535
Student's T-test Test statistic p16positive_normalFTE	Reactome pathway	FCERI mediated NF-kB activation	71	-0.208906	0.00240752	0.0268991	-0.907881	-0.915126
Student's T-test Test statistic p16positive_normalFTE	Reactome pathway	Glyoxylate metabolism and glycine degradation	18	0.413003	0.00243558	0.0270095	1.30711	1.2888
Student's T-test Test statistic p16positive_normalFTE	Reactome pathway	Beta-catenin phosphorylation cascade	13	-0.485204	0.00246692	0.026758	-2.12045	-3.44788
Student's T-test Test statistic p16positive_normalFTE	Reactome pathway	T41 mutants of beta-catenin aren't phosphorylated	13	-0.485204	0.00246692	0.0271544	-2.12045	-3.44788
Student's T-test Test statistic p16positive_normalFTE	Reactome pathway	Misspliced GSK3beta mutants stabilize beta-catenin	13	-0.485204	0.00246692	0.0269548	-2.12045	-3.44788
Student's T-test Test statistic p16positive_normalFTE	Reactome pathway	S45 mutants of beta-catenin aren't phosphorylated	13	-0.485204	0.00246692	0.0265641	-2.12045	-3.44788
Student's T-test Test statistic p16positive_normalFTE	Reactome pathway	S37 mutants of beta-catenin aren't phosphorylated	13	-0.485204	0.00246692	0.026373	-2.12045	-3.44788
Student's T-test Test statistic p16positive_normalFTE	Reactome pathway	S33 mutants of beta-catenin aren't phosphorylated	13	-0.485204	0.00246692	0.0261846	-2.12045	-3.44788
Student's T-test Test statistic p16positive_normalFTE	Reactome pathway	Signaling by Hippo	13	-0.48346	0.00255722	0.0269506	-1.88946	-1.65561
Student's T-test Test statistic p16positive_normalFTE	Reactome pathway	Endosomal Sorting Complex Required For Transport (ESCRT)	27	-0.335704	0.00256223	0.0268132	-1.37606	-1.5614
Student's T-test Test statistic p16positive_normalFTE	Reactome pathway	Transcription-Coupled Nucleotide Excision Repair (TC-NER)	37	0.286463	0.00260656	0.0270863	0.603461	0.53848
Student's T-test Test statistic p16positive_normalFTE	Reactome pathway	Neutrophil degranulation	332	-0.0972621	0.00267249	0.0275786	-0.61569	-0.494781
Student's T-test Test statistic p16positive_normalFTE	Reactome pathway	Regulation of Insulin-like Growth Factor (IGF) transport and uptake by Insulin-like Growth Factor Binding Proteins (IGFBPs)	58	0.228515	0.00267456	0.0274096	0.427317	0.697381
Student's T-test Test statistic p16positive_normalFTE	Reactome pathway	Attachment of GPI anchor to uPAR	6	0.706483	0.00273543	0.0278414	2.94918	2.5249
Student's T-test Test statistic p16positive_normalFTE	Reactome pathway	Initiation of Nuclear Envelope Reformation	10	-0.54725	0.00274181	0.0277165	-2.4561	-2.59244
Student's T-test Test statistic p16positive_normalFTE	Reactome pathway	Downstream TCR signaling	79	-0.194804	0.00284963	0.0286118	-0.855952	-0.820416
Student's T-test Test statistic p16positive_normalFTE	Reactome pathway	NoRC negatively regulates rRNA expression	43	0.263195	0.00287449	0.0286677	0.609346	0.655722
Student's T-test Test statistic p16positive_normalFTE	Reactome pathway	RNA Polymerase I Transcription Termination	23	0.356923	0.00307391	0.0304522	0.820089	0.806095
Student's T-test Test statistic p16positive_normalFTE	Reactome pathway	Ubiquitin Mediated Degradation of Phosphorylated Cdc25A	45	-0.253678	0.00329545	0.0324307	-0.972342	-0.963492
Student's T-test Test statistic p16positive_normalFTE	Reactome pathway	Scavenging of heme from plasma	15	0.43756	0.00336547	0.0329019	1.02339	1.05403
Student's T-test Test statistic p16positive_normalFTE	Reactome pathway	ISG15 antiviral mechanism	57	0.223888	0.00353674	0.0343503	0.491456	0.515339
Student's T-test Test statistic p16positive_normalFTE	Reactome pathway	Truncations of AMER1 destabilize the destruction complex	12	-0.485508	0.0036072	0.0348072	-2.15743	-3.51833
Student's T-test Test statistic p16positive_normalFTE	Reactome pathway	AXIN missense mutants destabilize the destruction complex	12	-0.485508	0.0036072	0.0343609	-2.15743	-3.51833
Student's T-test Test statistic p16positive_normalFTE	Reactome pathway	APC truncation mutants have impaired AXIN binding	12	-0.485508	0.0036072	0.0345826	-2.15743	-3.51833
Student's T-test Test statistic p16positive_normalFTE	Reactome pathway	FBXL7 down-regulates AURKA during mitotic entry and in early mitosis	47	-0.245325	0.00368347	0.0348639	-0.896837	-0.963492
Student's T-test Test statistic p16positive_normalFTE	Reactome pathway	G2/M DNA damage checkpoint	35	0.283699	0.00372793	0.0350614	0.890864	1.01714
Student's T-test Test statistic p16positive_normalFTE	Reactome pathway	Deadenylation of mRNA	24	0.341633	0.00380136	0.0355272	0.942726	0.900865
Student's T-test Test statistic p16positive_normalFTE	Reactome pathway	SCF(Skp2)-mediated degradation of p27/p21	47	-0.243811	0.00389994	0.0362207	-0.938334	-0.963492
Student's T-test Test statistic p16positive_normalFTE	Reactome pathway	MAPK6/MAPK4 signaling	65	-0.207403	0.00392774	0.0362523	-0.888611	-0.938061
Student's T-test Test statistic p16positive_normalFTE	Reactome pathway	Nonsense Mediated Decay (NMD) enhanced by the Exon Junction Complex (EJC)	104	-0.164202	0.00396739	0.0363922	-0.719423	-1.01658
Student's T-test Test statistic p16positive_normalFTE	Reactome pathway	Glycolysis	31	-0.298479	0.00407243	0.0371266	-1.34284	-1.61026
Student's T-test Test statistic p16positive_normalFTE	Reactome pathway	MET activates RAP1 and RAC1	7	-0.625791	0.00415355	0.0376353	-2.62636	-3.10766
Student's T-test Test statistic p16positive_normalFTE	Reactome pathway	Pausing and recovery of Tat-mediated HIV elongation	30	0.301709	0.00428275	0.0383383	0.765104	0.511631
Student's T-test Test statistic p16positive_normalFTE	Reactome pathway	Tat-mediated HIV elongation arrest and recovery	30	0.301709	0.00428275	0.0385707	0.765104	0.511631
Student's T-test Test statistic p16positive_normalFTE	Reactome pathway	Glucagon-like Peptide-1 (GLP1) regulates insulin secretion	19	-0.376903	0.0044846	0.0399049	-1.71193	-1.29511
Student's T-test Test statistic p16positive_normalFTE	Reactome pathway	Adrenaline,noradrenaline inhibits insulin secretion	10	-0.519202	0.00448636	0.0396829	-2.28726	-1.98066
Student's T-test Test statistic p16positive_normalFTE	Reactome pathway	Sema4D mediated inhibition of cell attachment and migration	5	-0.728855	0.0047762	0.0419967	-2.84835	-3.29451
Student's T-test Test statistic p16positive_normalFTE	Reactome pathway	tRNA modification in the mitochondrion	6	0.664135	0.00485623	0.0424492	2.94188	2.62546
Student's T-test Test statistic p16positive_normalFTE	Reactome pathway	Activation of C3 and C5	5	0.724479	0.0050346	0.043751	2.1475	2.07899
Student's T-test Test statistic p16positive_normalFTE	Reactome pathway	Post-translational protein phosphorylation	55	0.219058	0.00505199	0.0436469	0.403091	0.672656
Student's T-test Test statistic p16positive_normalFTE	Reactome pathway	Prostacyclin signalling through prostacyclin receptor	8	-0.572003	0.0051006	0.0433114	-2.468	-2.44481
Student's T-test Test statistic p16positive_normalFTE	Reactome pathway	Glucagon signaling in metabolic regulation	8	-0.572003	0.0051006	0.0438121	-2.468	-2.44481
Student's T-test Test statistic p16positive_normalFTE	Reactome pathway	Glucagon-type ligand receptors	8	-0.572003	0.0051006	0.0435603	-2.468	-2.44481
Student's T-test Test statistic p16positive_normalFTE	Reactome pathway	HDR through Homologous Recombination (HRR)	22	0.343621	0.00531237	0.0448533	0.859538	1.03261
Student's T-test Test statistic p16positive_normalFTE	Reactome pathway	Meiotic synapsis	25	-0.320537	0.00558355	0.0468766	-1.24129	-1.42198
Student's T-test Test statistic p16positive_normalFTE	Reactome pathway	CDT1 association with the CDC6:ORC:origin complex	46	-0.235572	0.00579833	0.0484063	-0.951838	-0.941381
Student's T-test Test statistic p16positive_normalFTE	Reactome pathway	Transport of Mature mRNA Derived from an Intronless Transcript	35	0.26869	0.00601673	0.049949	0.528025	0.669371
Student's T-test Test statistic p16positive_normalFTE	Student's T-test significant	p16pos_nonp16	830	-0.180723	1.56044e-17	1.56044e-17	-0.751978	-3.71837
Student's T-test Test statistic p16positive_normalFTE	Student's T-test Significant p16pos_nonp16	+	830	-0.180723	1.56044e-17	1.56044e-17	-0.751978	-3.71837
Student's T-test Test statistic p16positive_normalFTE	WikiPathway	WP_CILIOPATHIES	117	-0.565033	8.16887e-26	5.84891e-23	-2.09336	-2.26083
Student's T-test Test statistic p16positive_normalFTE	WikiPathway	WP_GENES_RELATED_TO_PRIMARY_CILIUM_DEVELOPMENT_BASED_ON_CRISPR	78	-0.554738	3.10228e-17	1.11062e-14	-2.08487	-2.265
Student's T-test Test statistic p16positive_normalFTE	WikiPathway	WP_BARDETBIEDL_SYNDROME	53	-0.531571	2.39689e-11	5.72057e-09	-1.99268	-2.2021
Student's T-test Test statistic p16positive_normalFTE	WikiPathway	WP_JOUBERT_SYNDROME	57	-0.485559	2.51952e-10	4.50995e-08	-1.75216	-2.49327
Student's T-test Test statistic p16positive_normalFTE	WikiPathway	WP_INTRAFLAGELLAR_TRANSPORT_PROTEINS_BINDING_TO_DYNEIN	20	-0.720142	2.5378e-08	3.63413e-06	-2.9636	-2.38806
Student's T-test Test statistic p16positive_normalFTE	WikiPathway	WP_MRNA_PROCESSING	117	0.271397	4.514e-07	5.38671e-05	0.67547	0.722024
Student's T-test Test statistic p16positive_normalFTE	WikiPathway	WP_OXIDATIVE_PHOSPHORYLATION	41	-0.445294	8.42775e-07	8.62038e-05	-1.75302	-1.84541
Student's T-test Test statistic p16positive_normalFTE	WikiPathway	WP_DNA_REPLICATION	24	0.56625	1.61014e-06	0.000144108	2.03119	2.09894
Student's T-test Test statistic p16positive_normalFTE	WikiPathway	WP_CYTOPLASMIC_RIBOSOMAL_PROTEINS	81	-0.306376	2.02728e-06	0.000161282	-1.19929	-1.2232
Student's T-test Test statistic p16positive_normalFTE	WikiPathway	WP_CILIARY_LANDSCAPE	174	-0.208356	2.52005e-06	0.000180436	-0.909877	-1.20123
Student's T-test Test statistic p16positive_normalFTE	WikiPathway	WP_TUMOR_SUPPRESSOR_ACTIVITY_OF_SMARCB1	19	0.590008	8.6378e-06	0.000562243	2.10465	1.85359
Student's T-test Test statistic p16positive_normalFTE	WikiPathway	WP_DNA_IRDAMAGE_AND_CELLULAR_RESPONSE_VIA_ATR	44	0.387178	9.18819e-06	0.000548229	1.38683	1.08958
Student's T-test Test statistic p16positive_normalFTE	WikiPathway	WP_G1_TO_S_CELL_CYCLE_CONTROL	29	0.476126	9.31774e-06	0.000513192	1.84406	1.90004
Student's T-test Test statistic p16positive_normalFTE	WikiPathway	WP_WNT_SIGNALING_PATHWAY_AND_PLURIPOTENCY	40	-0.37808	3.61617e-05	0.00184941	-1.78753	-1.34511
Student's T-test Test statistic p16positive_normalFTE	WikiPathway	WP_VASOPRESSINREGULATED_WATER_REABSORPTION	25	-0.476975	3.72645e-05	0.00177876	-2.14206	-2.21388
Student's T-test Test statistic p16positive_normalFTE	WikiPathway	WP_CELL_CYCLE	62	0.290783	7.8266e-05	0.0035024	1.03826	0.690246
Student's T-test Test statistic p16positive_normalFTE	WikiPathway	WP_ALSTROM_SYNDROME	25	-0.453316	8.88197e-05	0.00374088	-1.80953	-1.79386
Student's T-test Test statistic p16positive_normalFTE	WikiPathway	WP_CALCIUM_REGULATION_IN_CARDIAC_CELLS	57	-0.290626	0.00015295	0.00608401	-1.38319	-0.92393
Student's T-test Test statistic p16positive_normalFTE	WikiPathway	WP_DNA_MISMATCH_REPAIR	18	0.482303	0.000400348	0.0150868	1.41496	1.85685
Student's T-test Test statistic p16positive_normalFTE	WikiPathway	WP_RETINOBLASTOMA_GENE_IN_CANCER	45	0.301176	0.000484866	0.0173582	1.12485	1.07509
Student's T-test Test statistic p16positive_normalFTE	WikiPathway	WP_TYPE_II_DIABETES_MELLITUS	11	-0.606506	0.000498763	0.0170055	-2.67857	-3.20327
Student's T-test Test statistic p16positive_normalFTE	WikiPathway	WP_COMPLEMENT_AND_COAGULATION_CASCADES	31	0.354022	0.000656727	0.0213735	0.821225	1.08716
Student's T-test Test statistic p16positive_normalFTE	WikiPathway	WP_COMPLEMENT_ACTIVATION	16	0.490479	0.000687741	0.0214097	1.26279	1.31143
Student's T-test Test statistic p16positive_normalFTE	WikiPathway	WP_ARRHYTHMOGENIC_RIGHT_VENTRICULAR_CARDIOMYOPATHY	36	-0.326765	0.000704681	0.021023	-1.50764	-1.44288
Student's T-test Test statistic p16positive_normalFTE	WikiPathway	WP_MIRNA_REGULATION_OF_DNA_DAMAGE_RESPONSE	36	0.317727	0.000987548	0.0282834	1.01064	1.04535
Student's T-test Test statistic p16positive_normalFTE	WikiPathway	WP_MAPK_SIGNALING_PATHWAY	112	-0.180324	0.00103335	0.0284569	-0.995457	-0.712145
Student's T-test Test statistic p16positive_normalFTE	WikiPathway	WP_G_PROTEIN_SIGNALING_PATHWAYS	47	-0.276904	0.00104586	0.0277347	-1.44742	-0.918259
Student's T-test Test statistic p16positive_normalFTE	WikiPathway	WP_MITOCHONDRIAL_COMPLEX_III_ASSEMBLY	15	0.478591	0.00134042	0.0342765	1.41611	1.02913
Student's T-test Test statistic p16positive_normalFTE	WikiPathway	WP_PROSTAGLANDIN_SYNTHESIS_AND_REGULATION	19	-0.423414	0.00141002	0.0348128	-1.96866	-2.00681
Student's T-test Test statistic p16positive_normalFTE	WikiPathway	WP_LEPTININSULIN_SIGNALING_OVERLAP	7	-0.695711	0.00144001	0.0343682	-2.84029	-3.35788
Student's T-test Test statistic p16positive_normalFTE	WikiPathway	WP_EXTRACELLULAR_VESICLES_IN_THE_CROSSTALK_OF_CARDIAC_CELLS	9	-0.608836	0.00156921	0.0362436	-2.4253	-2.35803
Student's T-test Test statistic p16positive_normalFTE	WikiPathway	WP_DNA_REPAIR_PATHWAYS_FULL_NETWORK	73	0.214632	0.00157167	0.0351661	0.491612	0.698478
Student's T-test Test statistic p16positive_normalFTE	WikiPathway	WP_GLYCOGEN_SYNTHESIS_AND_DEGRADATION	30	-0.332946	0.00161989	0.0351468	-1.73871	-1.77719
Student's T-test Test statistic p16positive_normalFTE	WikiPathway	WP_DNA_IRDOUBLE_STRAND_BREAKS_AND_CELLULAR_RESPONSE_VIA_ATM	35	0.308224	0.0016269	0.0342605	1.1473	1.02556
Student's T-test Test statistic p16positive_normalFTE	WikiPathway	WP_MYOMETRIAL_RELAXATION_AND_CONTRACTION_PATHWAYS	62	-0.231908	0.00163287	0.0334038	-1.25155	-0.837124
Student's T-test Test statistic p16positive_normalFTE	WikiPathway	WP_DOPAMINE_METABOLISM	9	-0.603657	0.00172044	0.0342176	-2.32103	-1.89857
Student's T-test Test statistic p16positive_normalFTE	WikiPathway	WP_PHOTODYNAMIC_THERAPYINDUCED_UNFOLDED_PROTEIN_RESPONSE	11	0.54426	0.00178336	0.0345103	2.11678	2.0798
Student's T-test Test statistic p16positive_normalFTE	WikiPathway	WP_EFFECT_OF_PROGERIN_ON_GENES_INVOLVED_IN_HUTCHINSONGILFORD_PROGERIA_SYNDROME	16	0.445579	0.00204452	0.0385231	1.56077	1.25361
Student's T-test Test statistic p16positive_normalFTE	WikiPathway	WP_MARKERS_OF_KIDNEY_CELL_LINEAGE	20	-0.391979	0.00242813	0.044578	-1.55487	-1.28852
Student's T-test Test statistic p16positive_normalFTE	WikiPathway	WP_NOVEL_INTRACELLULAR_COMPONENTS_OF_RIGILIKE_RECEPTOR_PATHWAY	37	-0.287699	0.00249717	0.0446994	-1.54106	-1.43059
Student's T-test Test statistic p16positive_normalFTE	WikiPathway	WP_MITOCHONDRIAL_COMPLEX_I_ASSEMBLY_MODEL_OXPHOS_SYSTEM	51	-0.243484	0.00268531	0.0468948	-1.02117	-0.772764
Student's T-test Test statistic p16positive_normalFTE	WikiPathway	WP_ALZHEIMERS_DISEASE_AND_MIRNA_EFFECTS	160	-0.137722	0.00282718	0.0481967	-0.727411	-0.740092
Student's T-test Test statistic p16positive_normalFTE	WikiPathway	WP_ALZHEIMERS_DISEASE	160	-0.137722	0.00282718	0.0470758	-0.727411	-0.740092
Student's T-test Test statistic p16positive_normalFTE	WikiPathway	WP_CHOLESTEROL_METABOLISM	44	0.259234	0.00298053	0.0485013	0.696572	0.75035
