# Supplementary material for: Spatial proteomics of ovarian cancer precursors delineates early disease changes and drug targets
Source: Mol Syst Biol. 2025 Nov 13;22(1):7–41. doi: 10.1038/s44320-025-00168-4 (PMC12759074; doi:10.1038/s44320-025-00168-4)
Supplement: Supplementary file 12 — Dataset EV6 [file 44320_2025_168_MOESM12_ESM.xlsx]

## Sheet: Legend
Dataset EV6. Student's t-test results used for differential abundance analysis and visualized in the volcano plot figure 3E. Pairwise proteomic comparison between ciliated-like epithelial (dark pink, 20 samples) and secretory-like epithelial (dark blue, 15 samples) samples. Known secretory (e.g., PAX8) and ciliated (e.g., FOXJ1) markers are highlighted (two-sided t-test, permutation-based FDR < 0…

## Sheet: Dataset EV6
Gene	Protein Group	Protein ID	Protein name	First protein description	T-test difference (pre-malignant vs. normal FTE, log2)	T-test statistic	T-test p-value (-log10)	T-test q-value (-log10)
DAPL1	A0PJW8	A0PJW8	DAPL1_HUMAN	Death-associated protein-like 1	-0.446822	-1.09132	0.548156	0.431421
CCDC78	A2IDD5	A2IDD5	CCD78_HUMAN	Coiled-coil domain-containing protein 78	1.83912	9.13422	9.82786	0
DCDC2B	A2VCK2	A2VCK2	DCD2B_HUMAN	Doublecortin domain-containing protein 2B	1.96094	6.77438	6.99707	0
CDHR4	A6H8M9	A6H8M9	CDHR4_HUMAN	Cadherin-related family member 4	2.03093	9.82919	10.6042	0
VWA3A	A6NCI4	A6NCI4	VWA3A_HUMAN	von Willebrand factor A domain-containing protein 3A	1.79517	6.25848	6.34509	0
CFAP73	A6NFT4	A6NFT4	CFA73_HUMAN	Cilia- and flagella-associated protein 73	1.72483	6.39777	6.52194	0
SNTN	A6NMZ2	A6NMZ2	SNTAN_HUMAN	Sentan	2.06546	7.32306	7.67963	0
RIIAD1	A6NNX1	A6NNX1	RIAD1_HUMAN	RIIa domain-containing protein 1	0.961907	4.85034	4.54285	0.00016
ZBBX	A8MT70	A8MT70	ZBBX_HUMAN	Zinc finger B-box domain-containing protein 1	2.08854	9.75592	10.5236	0
FAM166B	A8MTA8	A8MTA8	F166B_HUMAN	Protein FAM166B	2.10806	7.89848	8.38076	0
SNRPG;SNRPGP15	A8MWD9;P62308	A8MWD9;P62308	RUXGL_HUMAN;RUXG_HUMAN	Putative small nuclear ribonucleoprotein G-like protein 15	-0.141926	-1.3393	0.722106	0.320502
ODF3B	A8MYP8	A8MYP8	ODF3B_HUMAN	Outer dense fiber protein 3B	2.24779	10.2549	11.0661	0
ANKRD66	B4E2M5	B4E2M5	ANR66_HUMAN	Ankyrin repeat domain-containing protein 66	0.980396	4.67382	4.31808	0.000307692
NACA	E9PAV3	E9PAV3	NACAM_HUMAN	Nascent polypeptide-associated complex subunit alpha, muscle-specific form	-0.0706848	-0.990064	0.482346	0.492069
DDX39A	O00148	O00148	DX39A_HUMAN	ATP-dependent RNA helicase DDX39A	0.0848687	0.551808	0.232994	0.743149
FXYD1	O00168	O00168	PLM_HUMAN	Phospholemman	-0.180763	-0.449561	0.183119	0.799181
AIP	O00170	O00170	AIP_HUMAN	AH receptor-interacting protein	-0.201626	-3.42937	2.78455	0.00422346
CLIC1	O00299	O00299	CLIC1_HUMAN	Chloride intracellular channel protein 1	0.316507	3.99	3.46075	0.000961039
RNASET2	O00584	O00584	RNT2_HUMAN	Ribonuclease T2	-0.153044	-1.00543	0.492139	0.483923
PODXL	O00592	O00592	PODXL_HUMAN	Podocalyxin	0.0350577	0.156765	0.0573051	0.934887
UBE2C	O00762	O00762	UBE2C_HUMAN	Ubiquitin-conjugating enzyme E2 C	-0.0955296	-0.240906	0.0909158	0.896198
PLPP3	O14495	O14495	PLPP3_HUMAN	Phospholipid phosphatase 3	-0.026821	-0.0954882	0.034091	0.959052
HSPB6	O14558	O14558	HSPB6_HUMAN	Heat shock protein beta-6	-0.739389	-2.32707	1.58095	0.0607782
DNALI1	O14645	O14645	IDLC_HUMAN	Axonemal dynein light intermediate polypeptide 1	1.86036	8.38232	8.95728	0
NDC80	O14777	O14777	NDC80_HUMAN	Kinetochore protein NDC80 homolog	-0.251364	-0.564879	0.239595	0.737786
TAX1BP3	O14907	O14907	TX1B3_HUMAN	Tax1-binding protein 3	-0.352393	-2.1098	1.37117	0.0914694
MYL12A;MYL12B	O14950;P19105	P19105;O14950	ML12A_HUMAN;ML12B_HUMAN	Myosin regulatory light chain 12B	0.0641167	0.875993	0.411879	0.562399
CLGN	O14967	O14967	CLGN_HUMAN	Calmegin	1.19202	6.94424	7.2097	0
FYB1	O15117	O15117	FYB1_HUMAN	FYN-binding protein 1	-0.155333	-0.532583	0.223378	0.756664
ARPC2	O15144	O15144	ARPC2_HUMAN	Actin-related protein 2/3 complex subunit 2	0.0179172	0.291257	0.112002	0.872972
HMGB3	O15347	O15347	HMGB3_HUMAN	High mobility group protein B3	0.118526	0.886099	0.417964	0.556452
EIF3H	O15372	O15372	EIF3H_HUMAN	Eukaryotic translation initiation factor 3 subunit H	-0.0770235	-1.73834	1.0387	0.179111
BIRC5	O15392	O15392	BIRC5_HUMAN	Baculoviral IAP repeat-containing protein 5	0	NaN	NaN	1
ARPC5	O15511	O15511	ARPC5_HUMAN	Actin-related protein 2/3 complex subunit 5	-0.0940197	-1.48042	0.829017	0.265614
CLDN3	O15551	P56747;O14493;O15551;O95484	CLD3_HUMAN	Claudin-3	0.0802118	0.581242	0.247931	0.727878
CYB5B	O43169	O43169	CYB5B_HUMAN	Cytochrome b5 type B	0.157785	1.60074	0.924581	0.219217
TGFB1I1	O43294	O43294	TGFI1_HUMAN	Transforming growth factor beta-1-induced transcript 1 protein	-0.561734	-1.75405	1.05204	0.176093
PPIH	O43447	O43447	PPIH_HUMAN	Peptidyl-prolyl cis-trans isomerase H	-0.205304	-1.74142	1.04131	0.178526
EPB41L2	O43491	O43491	E41L2_HUMAN	Band 4.1-like protein 2	0.988409	4.95863	4.68117	9.67742e-05
WIPF1	O43516	O43516	WIPF1_HUMAN	WAS/WASL-interacting protein family member 1	-0.337712	-2.19521	1.45236	0.0779857
DNPH1	O43598	O43598	DNPH1_HUMAN	2'-deoxynucleoside 5'-phosphate N-hydrolase 1	-0.172088	-1.07115	0.534803	0.444277
SPRY1	O43609	O43609	SPY1_HUMAN	Protein sprouty homolog 1	-0.0230885	-0.151832	0.0553968	0.936349
TSPAN6	O43657	O43657	TSN6_HUMAN	Tetraspanin-6	0.53519	1.84559	1.13112	0.150517
PRC1	O43663	O43663	PRC1_HUMAN	Protein regulator of cytokinesis 1	-0.167053	-0.593014	0.253978	0.721789
BUB3	O43684	O43684	BUB3_HUMAN	Mitotic checkpoint protein BUB3	-0.0756141	-1.1967	0.619877	0.3801
NUDT21	O43809	O43809	CPSF5_HUMAN	Cleavage and polyadenylation specificity factor subunit 5	-0.088458	-1.28189	0.680242	0.345077
TYROBP	O43914	O43914	TYOBP_HUMAN	TYRO protein tyrosine kinase-binding protein	-0.374562	-2.07103	1.33488	0.0984966
RAD21	O60216	O60216	RAD21_HUMAN	Double-strand-break repair protein rad21 homolog	-0.152797	-2.61165	1.87112	0.0315294
GMFG	O60234	O60234	GMFG_HUMAN	Glia maturation factor gamma	-0.126014	-1.05409	0.523604	0.452305
TSPAN1	O60635	O60635	TSN1_HUMAN	Tetraspanin-1	1.72885	7.77174	8.22774	0
TSC22D2	O75157	O75157	T22D2_HUMAN	TSC22 domain family protein 2	-0.300692	-1.13908	0.580256	0.407351
ADAMTS4	O75173	O75173	ATS4_HUMAN	A disintegrin and metalloproteinase with thrombospondin motifs 4	-0.320438	-1.12286	0.569282	0.414922
HMMR	O75330	O75330	HMMR_HUMAN	Hyaluronan mediated motility receptor	0	NaN	NaN	1
TBCA	O75347	O75347	TBCA_HUMAN	Tubulin-specific chaperone A	0.112509	1.36556	0.741567	0.309754
SH3BGRL	O75368	O75368	SH3L1_HUMAN	Adapter SH3BGRL	-0.280183	-2.57563	1.83349	0.0341488
MTX2	O75431	O75431	MTX2_HUMAN	Metaxin-2	0.198489	1.89957	1.17875	0.136538
MED24	O75448	O75448	MED24_HUMAN	Mediator of RNA polymerase II transcription subunit 24	-0.2928	-3.19799	2.51581	0.00797861
BANF1	O75531	O75531	BAF_HUMAN	Barrier-to-autointegration factor	-0.119025	-1.04586	0.518231	0.456561
SCGB2A1	O75556	O75556	SG2A1_HUMAN	Mammaglobin-B	0.665345	1.61334	0.934814	0.21444
ZMYND10	O75800	O75800	ZMY10_HUMAN	Zinc finger MYND domain-containing protein 10	1.76859	8.76769	9.40741	0
EIF3J	O75822	O75822	EIF3J_HUMAN	Eukaryotic translation initiation factor 3 subunit J	-0.0886338	-1.27563	0.675734	0.347473
DCTN3	O75935	O75935	DCTN3_HUMAN	Dynactin subunit 3	0.00974534	0.122316	0.0441243	0.945664
ATP5MG	O75964	O75964	ATP5L_HUMAN	ATP synthase subunit g, mitochondrial	0.163332	1.39285	0.762006	0.298786
STK17B	O94768	O94768	ST17B_HUMAN	Serine/threonine-protein kinase 17B	-0.617702	-2.59063	1.84913	0.0328833
USP1	O94782	O94782	UBP1_HUMAN	Ubiquitin carboxyl-terminal hydrolase 1	-0.265664	-0.986972	0.480385	0.493502
ALDH1A2	O94788	O94788	AL1A2_HUMAN	Retinal dehydrogenase 2	0.159992	0.631609	0.274093	0.705797
ABCA8	O94911	O94911	ABCA8_HUMAN	ABC-type organic anion transporter ABCA8	-0.377914	-1.20595	0.626331	0.376185
GLS	O94925	O94925	GLSK_HUMAN	Glutaminase kidney isoform, mitochondrial	-0.337551	-2.69972	1.96417	0.0261674
FBXO21	O94952	O94952	FBX21_HUMAN	F-box only protein 21	0.38546	2.85929	2.13637	0.0188462
INMT	O95050	O95050	INMT_HUMAN	Indolethylamine N-methyltransferase	0.12397	0.43577	0.17663	0.806317
CCNB2	O95067	O95067	CCNB2_HUMAN	G2/mitotic-specific cyclin-B2	-0.228179	-1.00548	0.492171	0.484845
PRSS23	O95084	O95084	PRS23_HUMAN	Serine protease 23	-0.343879	-1.29873	0.692418	0.336533
DUSP14	O95147	O95147	DUS14_HUMAN	Dual specificity protein phosphatase 14	0.58485	2.27173	1.52652	0.0674868
NDUFA7	O95182	O95182	NDUA7_HUMAN	NADH dehydrogenase [ubiquinone] 1 alpha subcomplex subunit 7	0.0955197	0.800431	0.367354	0.613852
VAMP5	O95183	O95183	VAMP5_HUMAN	Vesicle-associated membrane protein 5	-0.238268	-0.700918	0.311342	0.663125
ZWINT	O95229	O95229	ZWINT_HUMAN	ZW10 interactor	-0.389257	-1.89118	1.1713	0.138804
CELF2	O95319	O95319	CELF2_HUMAN	CUGBP Elav-like family member 2	-0.0770756	-0.684354	0.302309	0.670572
AHSA1	O95433	O95433	AHSA1_HUMAN	Activator of 90 kDa heat shock protein ATPase homolog 1	0.715236	7.81411	8.27899	0
FMNL1	O95466	O95466	FMNL1_HUMAN	Formin-like protein 1	-0.37958	-3.01453	2.30806	0.0131574
CLDN1	O95832	O95832	CLD1_HUMAN	Claudin-1	-0.362824	-0.916394	0.43639	0.53776
DDAH2	O95865	O95865	DDAH2_HUMAN	N(G),N(G)-dimethylarginine dimethylaminohydrolase 2	-0.409884	-3.08353	2.38561	0.0110208
FAM107A	O95990	O95990	F107A_HUMAN	Actin-associated protein FAM107A	-0.281841	-1.24978	0.657238	0.356802
AGR2	O95994	O95994	AGR2_HUMAN	Anterior gradient protein 2 homolog	2.27633	8.26895	8.82332	0
MT-CYB	P00156	P00156	CYB_HUMAN	Cytochrome b	-0.249292	-1.44719	0.803331	0.277732
LDHA	P00338	P00338	LDHA_HUMAN	L-lactate dehydrogenase A chain	-0.0302138	-0.191483	0.0709283	0.914822
ALDH1A1	P00352	P00352	AL1A1_HUMAN	Aldehyde dehydrogenase 1A1	0.399741	1.44894	0.804681	0.27758
SOD1	P00441	P00441	SODC_HUMAN	Superoxide dismutase [Cu-Zn]	-0.215347	-1.62111	0.941154	0.213995
AK1	P00568	P00568	KAD1_HUMAN	Adenylate kinase isoenzyme 1	1.6714	6.93677	7.20038	0
C1R	P00736	P00736	C1R_HUMAN	Complement C1r subcomponent	0.0387759	0.149443	0.0544753	0.935736
F10	P00742	P00742	FA10_HUMAN	Coagulation factor X	0.00561328	0.0151611	0.00524526	0.991636
PLAT	P00750	P00750	TPA_HUMAN	Tissue-type plasminogen activator	0.191539	0.599248	0.257196	0.718504
MT-ATP6	P00846	P00846	ATP6_HUMAN	ATP synthase subunit a	0.110333	0.727059	0.325767	0.653108
ASS1	P00966	P00966	ASSY_HUMAN	Argininosuccinate synthase	-0.185727	-0.965213	0.466662	0.503803
C3	P01024	P01024	CO3_HUMAN	Complement C3	-0.509379	-2.19894	1.45594	0.0775054
TIMP1	P01033	P01033	TIMP1_HUMAN	Metalloproteinase inhibitor 1	0.617357	1.79159	1.08421	0.164682
CST3	P01034	P01034	CYTC_HUMAN	Cystatin-C	-0.0263683	-0.187006	0.0691524	0.915072
FOS	P01100	P01100	FOS_HUMAN	Protein c-Fos	-0.0101419	-0.0239316	0.00830829	0.987105
LDLR	P01130	P01130	LDLR_HUMAN	Low-density lipoprotein receptor	0	NaN	NaN	1
CD8A	P01732	P01732	CD8A_HUMAN	T-cell surface glycoprotein CD8 alpha chain	0.374978	1.31386	0.703432	0.32962
HLA-B	P01889	P01889;P04439	HLAB_HUMAN	HLA class I histocompatibility antigen, B alpha chain	-0.00961965	-0.0401799	0.0140386	0.980513
HLA-DRA	P01903	P01903;P01906	DRA_HUMAN	HLA class II histocompatibility antigen, DR alpha chain	0.0499426	0.192064	0.0711592	0.915501
HLA-DRB1	P01911	P01911	DRB1_HUMAN	HLA class II histocompatibility antigen, DRB1 beta chain	-0.0804007	-0.252046	0.0955176	0.890637
COL1A1	P02452	P02452	CO1A1_HUMAN	Collagen alpha-1(I) chain	-0.0781634	-0.226431	0.0849892	0.899918
COL3A1	P02461	P02461	CO3A1_HUMAN	Collagen alpha-1(III) chain	-0.26386	-0.699661	0.310654	0.663174
CRYAB	P02511	P02511	CRYAB_HUMAN	Alpha-crystallin B chain	-0.77628	-3.67113	3.07227	0.00212195
LMNA	P02545	P02545	LMNA_HUMAN	Prelamin-A/C	0.0301136	0.279496	0.107011	0.880739
APOE	P02649	P02649	APOE_HUMAN	Apolipoprotein E	-0.653489	-2.26472	1.51966	0.0679552
LRG1	P02750	P02750	A2GL_HUMAN	Leucine-rich alpha-2-glycoprotein	-0.0708756	-0.228299	0.0857505	0.900704
CXCL10	P02778	P02778	CXL10_HUMAN	C-X-C motif chemokine 10	-0.345475	-1.67366	0.984423	0.197115
FTL	P02792	P02792	FRIL_HUMAN	Ferritin light chain	-0.815622	-2.44135	1.69548	0.0458956
FTH1	P02794	P02794	FRIH_HUMAN	Ferritin heavy chain	-1.00028	-4.6187	4.24811	0.000396947
ESR1	P03372	P03372	ESR1_HUMAN	Estrogen receptor	-0.403375	-2.70468	1.96945	0.0261525
MT-ND2	P03891	P03891	NU2M_HUMAN	NADH-ubiquinone oxidoreductase chain 2	0.421022	2.33759	1.59138	0.0597323
MT-ND3	P03897	P03897	NU3M_HUMAN	NADH-ubiquinone oxidoreductase chain 3	0.360156	1.49608	0.841227	0.258965
MT-ND4	P03905	P03905	NU4M_HUMAN	NADH-ubiquinone oxidoreductase chain 4	0.278074	2.59579	1.85452	0.0326192
MT-ND5	P03915	P03915	NU5M_HUMAN	NADH-ubiquinone oxidoreductase chain 5	-0.171591	-0.995995	0.486116	0.490278
SLPI	P03973	P03973	SLPI_HUMAN	Antileukoproteinase	0.122834	0.270439	0.103195	0.883387
ALDOA	P04075	P04075	ALDOA_HUMAN	Fructose-bisphosphate aldolase A	0.105958	1.0706	0.53444	0.443819
ANXA1	P04083	P04083	ANXA1_HUMAN	Annexin A1	0.840331	8.11276	8.63762	0
NR3C1	P04150	P04150	GCR_HUMAN	Glucocorticoid receptor	-0.0257494	-0.298329	0.115022	0.871757
PRNP	P04156	P04156	PRIO_HUMAN	Major prion protein	-0.162881	-1.23168	0.644407	0.365803
SOD2	P04179	P04179	SODM_HUMAN	Superoxide dismutase [Mn], mitochondrial	0.0108654	0.0460349	0.0161213	0.979439
TK1	P04183	P04183	KITH_HUMAN	Thymidine kinase, cytosolic	0.00847308	0.0318205	0.0110814	0.984582
THY1	P04216	P04216	THY1_HUMAN	Thy-1 membrane glycoprotein	0.449531	1.37135	0.745887	0.307023
CD74	P04233	P04233	HG2A_HUMAN	HLA class II histocompatibility antigen gamma chain	-0.07474	-0.361901	0.142829	0.83692
CD3D	P04234	P04234	CD3D_HUMAN	T-cell surface glycoprotein CD3 delta chain	-0.200563	-0.615207	0.26549	0.713608
GAPDH	P04406	P04406	G3P_HUMAN	Glyceraldehyde-3-phosphate dehydrogenase	-0.363522	-3.48332	2.84817	0.00359091
HLA-A	P04439	P04439	HLAA_HUMAN	HLA class I histocompatibility antigen, A alpha chain	-0.243829	-1.10736	0.558863	0.421097
HLA-DPB1	P04440	P04440	DPB1_HUMAN	HLA class II histocompatibility antigen, DP beta 1 chain	-0.00448111	-0.00910846	0.00314373	0.994124
TP53	P04637	P04637	P53_HUMAN	Cellular tumor antigen p53	-0.650614	-2.23583	1.49156	0.0708406
TYMS	P04818	P04818	TYSY_HUMAN	Thymidylate synthase	0.0618134	0.296311	0.114159	0.872265
APOD	P05090	P05090	APOD_HUMAN	Apolipoprotein D	0.0633123	0.346865	0.136145	0.842634
ITGB2	P05107	P05107	ITB2_HUMAN	Integrin beta-2	-0.128446	-0.973371	0.47179	0.498614
SLC25A5	P05141	P05141;P12236;P12235;Q9H0C2	ADT2_HUMAN	ADP/ATP translocase 2	0.171313	1.26347	0.667007	0.351339
SERPINA5	P05154	P05154	IPSP_HUMAN	Plasma serine protease inhibitor	0.487221	1.64156	0.957904	0.207239
ISG15	P05161	P05161	ISG15_HUMAN	Ubiquitin-like protein ISG15	0.0824906	0.234216	0.0881692	0.899381
HMGN2	P05204	P05204	HMGN2_HUMAN	Non-histone chromosomal protein HMG-17	0.03958	0.227218	0.0853101	0.900436
ICAM1	P05362	P05362	ICAM1_HUMAN	Intercellular adhesion molecule 1	-0.267035	-1.84495	1.13055	0.150303
RPLP1	P05386	P05386	RLA1_HUMAN	Large ribosomal subunit protein P1	-0.167033	-2.33338	1.58721	0.0601725
RPLP2	P05387	P05387	RLA2_HUMAN	Large ribosomal subunit protein P2	-0.293305	-2.69838	1.96274	0.0261754
RPLP0	P05388	P05388	RLA0_HUMAN	Large ribosomal subunit protein uL10	-0.102314	-1.08294	0.542593	0.436626
JUN	P05412	P05412	JUN_HUMAN	Transcription factor Jun	-0.238856	-1.28576	0.683031	0.343389
INSR	P06213	P06213	INSR_HUMAN	Insulin receptor	0.511389	5.4107	5.26053	3.57143e-05
LCK	P06239	P06239	LCK_HUMAN	Tyrosine-protein kinase Lck	-0.267392	-1.04847	0.519932	0.455602
FYN	P06241	P06241	FYN_HUMAN	Tyrosine-protein kinase Fyn	-0.0867836	-0.744811	0.33568	0.643859
GSN	P06396	Cont_Q3SX14;P06396	GELS_HUMAN	Gelsolin	0.0152415	0.121383	0.0437719	0.945174
PTMA	P06454	P06454	PTMA_HUMAN	Prothymosin alpha	-0.467415	-4.43383	4.01433	0.000481203
CDK1	P06493	P06493	CDK1_HUMAN	Cyclin-dependent kinase 1	-0.0751918	-0.392049	0.156429	0.82659
S100A6	P06703	P06703	S10A6_HUMAN	Protein S100-A6	-0.0287062	-0.120783	0.0435457	0.944555
ENO1	P06733	P06733	ENOA_HUMAN	Alpha-enolase	-0.284211	-2.71196	1.97722	0.0258462
NPM1	P06748	P06748	NPM_HUMAN	Nucleophosmin	-0.26708	-2.21306	1.46954	0.0752491
TPM3	P06753	P06753	TPM3_HUMAN	Tropomyosin alpha-3 chain	0.21441	2.7263	1.99253	0.0252364
GPX1	P07203	P07203	GPX1_HUMAN	Glutathione peroxidase 1	-0.349276	-3.57739	2.95993	0.00275294
DCN	P07585	P07585	PGS2_HUMAN	Decorin	0.185718	0.441853	0.179485	0.804758
CTSL	P07711	P07711	CATL1_HUMAN	Procathepsin L	0.531739	2.69722	1.9615	0.0261659
PFN1	P07737	Cont_P02584;P07737	PROF1_HUMAN	Profilin-1	-0.222423	-2.70038	1.96487	0.0261416
CD3E	P07766	P07766	CD3E_HUMAN	T-cell surface glycoprotein CD3 epsilon chain	-0.116388	-0.401723	0.16085	0.820503
HSP90AA1	P07900	P07900	HS90A_HUMAN	Heat shock protein HSP 90-alpha	0.694551	7.93385	8.42333	0
THBS1	P07996	Cont_Q28178;P07996	TSP1_HUMAN	Thrombospondin-1	-0.333911	-0.856369	0.40015	0.576162
RNASE1	P07998	P07998	RNAS1_HUMAN	Ribonuclease pancreatic	-0.345921	-1.65514	0.96909	0.202941
COL1A2	P08123	Cont_P02465;P08123	CO1A2_HUMAN	Collagen alpha-2(I) chain	-0.175369	-0.505833	0.210182	0.768261
RHOC	P08134	P08134	RHOC_HUMAN	Rho-related GTP-binding protein RhoC	0.0353717	0.29442	0.113351	0.872811
CD55	P08174	P08174	DAF_HUMAN	Complement decay-accelerating factor	-0.320682	-0.85322	0.398279	0.576681
MMP2	P08253	P08253	MMP2_HUMAN	72 kDa type IV collagenase	-0.19634	-0.525037	0.219634	0.761254
GSTA1	P08263	P08263;Q7RTV2	GSTA1_HUMAN	Glutathione S-transferase A1	1.66171	5.20251	4.99347	0.000101695
SOD3	P08294	P08294	SODE_HUMAN	Extracellular superoxide dismutase [Cu-Zn]	-0.359473	-1.11687	0.565248	0.416335
MGP	P08493	P08493	MGP_HUMAN	Matrix Gla protein	0.13731	0.571555	0.242987	0.734228
PTPRC	P08575	P08575	PTPRC_HUMAN	Receptor-type tyrosine-protein phosphatase C	-0.0570112	-0.501106	0.207872	0.768656
VIM	P08670	Cont_O43790;Cont_O95678;Cont_P02538;Cont_P04259;Cont_P05787;Cont_P08729;Cont_P12035;Cont_P13647;Cont_P48668;Cont_P78385;Cont_P78386;Cont_Q01546;Cont_Q14533;Cont_Q5XKE5;Cont_Q8N1N4;Cont_Q9NSB2;Cont_P07744;Cont_Q922U2;Cont_P50446;Cont_Q9DCV7;Cont_Q8BGZ7;Cont_Q8VED5;Cont_P15241;Cont_P25691;Q5XKE5;P04259;P12035;P78386;P05787;P08729;P13647;O43790;P14136;P02538;Q14533;O95678;P78385;P08670;P48668;Q01546…	VIME_HUMAN	Vimentin	0.50869	2.11945	1.38025	0.0901443
RPS17	P08708	P08708	RS17_HUMAN	Small ribosomal subunit protein eS17	-0.0566525	-0.511224	0.212824	0.766209
RPSA	P08865	A0A8I5KQE6;P08865	RSSA_HUMAN	Small ribosomal subunit protein uS2	-0.194656	-2.66451	1.92679	0.0281202
CD63	P08962	P08962	CD63_HUMAN	CD63 antigen	0.572687	3.82877	3.26318	0.00149068
MMP7	P09237	P09237	MMP7_HUMAN	Matrilysin	0.662799	1.74433	1.04378	0.178149
CD48	P09326	P09326	CD48_HUMAN	CD48 antigen	0.0635698	0.180518	0.0665885	0.918218
LGALS1	P09382	P09382	LEG1_HUMAN	Galectin-1	-0.487887	-1.93131	1.20711	0.128164
HMGB1	P09429	P09429;P26583	HMGB1_HUMAN	High mobility group protein B1	-0.0864831	-0.782378	0.356971	0.62165
RBP1	P09455	P09455	RET1_HUMAN	Retinol-binding protein 1	0.134145	0.789773	0.361212	0.618585
SPARC	P09486	P09486	SPRC_HUMAN	SPARC	-0.583203	-1.26763	0.669988	0.349359
TPM1	P09493	P09493	TPM1_HUMAN	Tropomyosin alpha-1 chain	0.29903	1.7383	1.03866	0.178602
ANXA4	P09525	P09525	ANXA4_HUMAN	Annexin A4	0.312325	2.61674	1.87646	0.0313249
PDGFRB	P09619	P09619	PGFRB_HUMAN	Platelet-derived growth factor receptor beta	0.0503925	0.142537	0.0518206	0.9379
HNRNPA1	P09651	A0A2R8Y4L2;P09651	ROA1_HUMAN	Heterogeneous nuclear ribonucleoprotein A1	-0.0398211	-0.411442	0.16532	0.814279
TACSTD2	P09758	P09758	TACD2_HUMAN	Tumor-associated calcium signal transducer 2	-0.255869	-1.30595	0.69767	0.332713
C1S	P09871	P09871	C1S_HUMAN	Complement C1s subcomponent	-0.566604	-1.96165	1.23445	0.121949
PRR29	P0C7W0	P0C7W0	PRR29_HUMAN	Proline-rich protein 29	1.30537	2.81363	2.08663	0.0213905
HSPA1A;HSPA1B	P0DMV8;P0DMV9	P0DMV9;P0DMV8	HS71A_HUMAN;HS71B_HUMAN	Heat shock 70 kDa protein 1A	0.00397806	0.044161	0.0154537	0.979828
CALM1;CALM2;CALM3	P0DP23;P0DP24;P0DP25	P0DP24;P0DP25;P0DP23	CALM1_HUMAN;CALM2_HUMAN;CALM3_HUMAN	Calmodulin-1	0.283157	3.55164	2.92924	0.003
SRGN	P10124	P10124	SRGN_HUMAN	Serglycin	-0.316089	-1.50227	0.846075	0.256339
AR	P10275	P10275	ANDR_HUMAN	Androgen receptor	-0.0340684	-0.211445	0.0789171	0.904237
HLA-C	P10321	P10321	HLAC_HUMAN	HLA class I histocompatibility antigen, C alpha chain	0.176922	0.619971	0.26798	0.712682
PTPRF	P10586	P10586	PTPRF_HUMAN	Receptor-type tyrosine-protein phosphatase F	0.265417	1.84245	1.12837	0.150169
NR2F1	P10589	P10589	COT1_HUMAN	COUP transcription factor 1	-0.509497	-2.87879	2.15771	0.0178937
TXN	P10599	P10599	THIO_HUMAN	Thioredoxin	1.20668	10.4197	11.2422	0
MGST1	P10620	P10620	MGST1_HUMAN	Microsomal glutathione S-transferase 1	0.546584	1.31596	0.704966	0.329157
TFPI	P10646	P10646	TFPI1_HUMAN	Tissue factor pathway inhibitor	-0.0884419	-0.592774	0.253854	0.72088
CLU	P10909	P10909	CLUS_HUMAN	Clusterin	-0.162751	-0.788275	0.360352	0.618774
SLC2A3	P11169	Q8TDB8;P11169	GTR3_HUMAN	Solute carrier family 2, facilitated glucose transporter member 3	-0.119976	-0.369978	0.146446	0.833634
FGFR1	P11362	P11362;P21802;P22607;P22455	FGFR1_HUMAN	Fibroblast growth factor receptor 1	-0.000269715	-0.000917449	0.000315627	0.999135
TOP2A	P11388	P11388	TOP2A_HUMAN	DNA topoisomerase 2-alpha	0.21011	0.441417	0.17928	0.803873
PRPS2	P11908	P21108;P11908;P60891	PRPS2_HUMAN	Ribose-phosphate pyrophosphokinase 2	0.196999	1.73059	1.03213	0.180441
PABPC1	P11940	P11940;Q4VXU2	PABP1_HUMAN	Polyadenylate-binding protein 1	0.0677326	1.27378	0.674405	0.347982
PCNA	P12004	P12004	PCNA_HUMAN	Proliferating cell nuclear antigen	-0.292073	-2.36826	1.62191	0.0552857
COL6A1	P12109	P12109	CO6A1_HUMAN	Collagen alpha-1(VI) chain	-0.0910392	-0.287285	0.110311	0.875136
COL6A2	P12110	P12110	CO6A2_HUMAN	Collagen alpha-2(VI) chain	-0.126699	-0.384636	0.15306	0.829192
COL6A3	P12111	P12111	CO6A3_HUMAN	Collagen alpha-3(VI) chain	-0.0887003	-0.270168	0.103081	0.882376
SLC25A6	P12236	P12236	ADT3_HUMAN	ADP/ATP translocase 3	0.246808	1.91278	1.19053	0.132966
IMPDH2	P12268	P12268	IMDH2_HUMAN	Inosine-5'-monophosphate dehydrogenase 2	-0.307241	-3.26577	2.5938	0.0069071
GZMA	P12544	P12544	GRAA_HUMAN	Granzyme A	0.21559	1.23456	0.646445	0.365536
CYBA	P13498	P13498	CY24A_HUMAN	Cytochrome b-245 light chain	0.0278036	0.0949765	0.0339015	0.958214
EEF2	P13639	P13639	EF2_HUMAN	Elongation factor 2	-0.139954	-2.18812	1.44556	0.079089
C6	P13671	P13671	CO6_HUMAN	Complement component C6	0.379393	1.38258	0.754293	0.30297
TPT1	P13693	Q56UQ5;P13693	TCTP_HUMAN	Translationally-controlled tumor protein	0.105396	1.14943	0.587301	0.402612
HLA-E	P13747	P13747	HLAE_HUMAN	HLA class I histocompatibility antigen, alpha chain E	0.219572	1.84856	1.13372	0.149939
LCP1	P13796	P13796	PLSL_HUMAN	Plastin-2	-0.729012	-5.27757	5.08973	6.89655e-05
MTHFD2	P13995	P13995	MTDC_HUMAN	Bifunctional methylenetetrahydrofolate dehydrogenase/cyclohydrolase, mitochondrial	0.40483	1.23171	0.644427	0.36657
MIF	P14174	P14174	MIF_HUMAN	Macrophage migration inhibitory factor	-0.231161	-0.374088	0.148294	0.834713
PRF1	P14222	P14222	PERF_HUMAN	Perforin-1	0.184763	0.631579	0.274078	0.704651
CPM	P14384	P14384	CBPM_HUMAN	Carboxypeptidase M	1.92738	4.07548	3.56634	0.000832215
CCNB1	P14635	P14635	CCNB1_HUMAN	G2/mitotic-specific cyclin-B1	-0.393209	-1.71099	1.01561	0.185244
MYL6B	P14649	P14649	MYL6B_HUMAN	Myosin light chain 6B	-0.207613	-1.87996	1.16136	0.141062
SNRPB	P14678	P14678	RSMB_HUMAN	Small nuclear ribonucleoprotein-associated proteins B and B'	-0.149279	-1.51429	0.855511	0.2511
RAC2	P15153	P15153	RAC2_HUMAN	Ras-related C3 botulinum toxin substrate 2	-0.227302	-1.42295	0.784794	0.286507
CD46	P15529	P15529	MCP_HUMAN	Membrane cofactor protein	1.10084	3.44456	2.80243	0.00404494
RPS2	P15880	P15880	RS2_HUMAN	Small ribosomal subunit protein uS5	-0.174031	-1.80085	1.0922	0.162071
MUC1	P15941	P15941	MUC1_HUMAN	Mucin-1	-0.0915408	-0.526866	0.22054	0.760839
TIMP2	P16035	P16035	TIMP2_HUMAN	Metalloproteinase inhibitor 2	0.0128215	0.0639373	0.0225481	0.97257
CD44	P16070	P16070	CD44_HUMAN	CD44 antigen	0.651227	4.0745	3.56513	0.000826667
SPN	P16150	P16150	LEUK_HUMAN	Leukosialin	-0.204722	-0.432423	0.175063	0.808102
PDGFRA	P16234	P16234	PGFRA_HUMAN	Platelet-derived growth factor receptor alpha	-0.190046	-0.774171	0.352283	0.626541
STMN1	P16949	P16949	STMN1_HUMAN	Stathmin	-0.804311	-3.01442	2.30793	0.0130909
YBX3	P16989	P16989	YBOX3_HUMAN	Y-box-binding protein 3	0.346845	2.91038	2.19243	0.0168235
HMGA1	P17096	P17096	HMGA1_HUMAN	High mobility group protein HMG-I/HMG-Y	-0.269711	-1.42418	0.785732	0.286465
JUNB	P17275	P17275	JUNB_HUMAN	Transcription factor JunB	-0.708525	-1.63542	0.952862	0.208565
JUND	P17535	P17535	JUND_HUMAN	Transcription factor JunD	0.0514274	0.608192	0.261835	0.71621
CEBPB	P17676	P17676	CEBPB_HUMAN	CCAAT/enhancer-binding protein beta	-0.25308	-2.89474	2.17523	0.0174244
IGFBP3	P17936	P17936	IBP3_HUMAN	Insulin-like growth factor-binding protein 3	0.0899572	0.424076	0.171171	0.811928
PSMC3	P17980	P17980	PRS6A_HUMAN	26S proteasome regulatory subunit 6A	0.142614	4.01389	3.4902	0.000921053
IGFBP2	P18065	Cont_P13384;P18065	IBP2_HUMAN	Insulin-like growth factor-binding protein 2	-0.434631	-0.974201	0.472313	0.49893
RPL35A	P18077	P18077	RL35A_HUMAN	Large ribosomal subunit protein eL33	-0.282021	-2.25066	1.50597	0.0692206
RPL7	P18124	P18124	RL7_HUMAN	Large ribosomal subunit protein uL30	-0.195647	-1.67455	0.985163	0.197315
EGR1	P18146	P18146	EGR1_HUMAN	Early growth response protein 1	-0.19831	-0.401899	0.160931	0.821523
VCL	P18206	P18206	VINC_HUMAN	Vinculin	-0.444857	-4.14021	3.64667	0.000739726
RPL17	P18621	P18621	RL17_HUMAN	Large ribosomal subunit protein uL22	-0.087843	-0.756978	0.342529	0.636968
ATF3	P18847	P18847	ATF3_HUMAN	Cyclic AMP-dependent transcription factor ATF-3	0.569573	1.7708	1.06635	0.171099
HLA-DPA1	P20036	P20036	DPA1_HUMAN	HLA class II histocompatibility antigen, DP alpha 1 chain	0.18069	0.390265	0.155617	0.826822
CCNA2	P20248	P20248	CCNA2_HUMAN	Cyclin-A2	-0.280174	-1.19336	0.617558	0.380765
ALOX5AP	P20292	P20292	AL5AP_HUMAN	Arachidonate 5-lipoxygenase-activating protein	-0.294645	-1.44199	0.799346	0.279293
LMNB1	P20700	P20700	LMNB1_HUMAN	Lamin-B1	-0.390083	-2.12738	1.38774	0.088955
OGN	P20774	P20774	MIME_HUMAN	Mimecan	-0.116442	-0.306149	0.118379	0.866173
PTMS	P20962	P20962	PTMS_HUMAN	Parathymosin	-0.829447	-4.56206	4.17633	0.000424242
CD247	P20963	P20963	CD3Z_HUMAN	T-cell surface glycoprotein CD3 zeta chain	-0.077634	-0.268051	0.102192	0.882972
CSRP1	P21291	P21291	CSRP1_HUMAN	Cysteine and glycine-rich protein 1	-0.27588	-1.61721	0.937967	0.215069
MDK	P21741	P21741	MK_HUMAN	Midkine	-0.415813	-1.43098	0.790917	0.284231
CD9	P21926	P21926	CD9_HUMAN	CD9 antigen	0.0317746	0.209467	0.0781203	0.904544
TGM2	P21980	P21980	TGM2_HUMAN	Protein-glutamine gamma-glutamyltransferase 2	-0.291176	-0.961391	0.464266	0.505645
TNXB	P22105	P22105	TENX_HUMAN	Tenascin-X	0.199749	0.703737	0.312888	0.661829
IDS	P22304	P22304	IDS_HUMAN	Iduronate 2-sulfatase	-0.0416381	-0.22366	0.0838618	0.898818
HNRNPA2B1	P22626	P22626	ROA2_HUMAN	Heterogeneous nuclear ribonucleoproteins A2/B1	0.0479058	0.769639	0.349703	0.628305
IGFBP4	P22692	P22692	IBP4_HUMAN	Insulin-like growth factor-binding protein 4	0.603539	2.05717	1.32199	0.100596
NR4A1	P22736	P22736	NR4A1_HUMAN	Nuclear receptor subfamily 4 group A member 1	-0.110824	-0.413749	0.166385	0.813486
FBLN1	P23142	Cont_A0A3Q1MJB2;P23142	FBLN1_HUMAN	Fibulin-1	-0.181126	-0.647494	0.282503	0.69608
RPS3	P23396	P23396	RS3_HUMAN	Small ribosomal subunit protein uS3	-0.225897	-2.78905	2.06001	0.0224486
CFL1	P23528	Q9Y281;P23528	COF1_HUMAN	Cofilin-1	-0.162196	-1.97946	1.25061	0.117742
DTYMK	P23919	P23919	KTHY_HUMAN	Thymidylate kinase	-0.258425	-2.32738	1.58126	0.0609531
RRM1	P23921	P23921	RIR1_HUMAN	Ribonucleoside-diphosphate reductase large subunit	-0.019195	-0.238287	0.0898388	0.897163
COX7A1	P24310	P24310	CX7A1_HUMAN	Cytochrome c oxidase subunit 7A1, mitochondrial	0.0565921	0.191	0.0707365	0.912801
NR2F2	P24468	P10589;P24468	COT2_HUMAN	COUP transcription factor 2	-0.454518	-3.54024	2.91568	0.00309827
EEF1B2	P24534	P24534	EF1B_HUMAN	Elongation factor 1-beta	0.0114106	0.135993	0.0493173	0.939477
IGFBP6	P24592	P24592	IBP6_HUMAN	Insulin-like growth factor-binding protein 6	-0.0703814	-0.3405	0.133336	0.847163
IGFBP5	P24593	P24593	IBP5_HUMAN	Insulin-like growth factor-binding protein 5	0.118018	0.426764	0.172422	0.810631
MYL9	P24844	P24844	MYL9_HUMAN	Myosin regulatory light polypeptide 9	-0.0922946	-1.0683	0.532927	0.444724
RPS12	P25398	P25398	RS12_HUMAN	Small ribosomal subunit protein eS12	-0.00786201	-0.0536781	0.0188543	0.975767
BRD2	P25440	P25440	BRD2_HUMAN	Bromodomain-containing protein 2	-0.127829	-2.67025	1.93287	0.028
DNAJB1	P25685	Q9UDY4;P25685	DNJB1_HUMAN	DnaJ homolog subfamily B member 1	-0.0859857	-1.15049	0.588022	0.402699
CTSS	P25774	P25774	CATS_HUMAN	Cathepsin S	0.567772	3.64874	3.04535	0.00228916
NFKBIA	P25963	P25963	IKBA_HUMAN	NF-kappa-B inhibitor alpha	-0.0575594	-0.517961	0.216139	0.763868
MSN	P26038	P15311;P35241;P26038	MOES_HUMAN	Moesin	0.159824	2.0794	1.34268	0.0972525
RPL13	P26373	P26373	RL13_HUMAN	Large ribosomal subunit protein eL13	-0.116445	-1.17256	0.60316	0.390675
S100A4	P26447	P26447	S10A4_HUMAN	Protein S100-A4	-0.736538	-2.76791	2.0372	0.0234101
HMGB2	P26583	P26583	HMGB2_HUMAN	High mobility group protein B2	0.49517	3.73785	3.15278	0.00191411
ZFP36	P26651	P26651	TTP_HUMAN	mRNA decay activator protein ZFP36	-0.254923	-0.616286	0.266054	0.714982
ANXA13	P27216	P27216	ANX13_HUMAN	Annexin A13	2.1294	6.84395	7.0843	0
RPL10	P27635	P27635	RL10_HUMAN	Large ribosomal subunit protein uL16	-0.192857	-1.93193	1.20766	0.128443
CD82	P27701	P27701	CD82_HUMAN	CD82 antigen	0.809242	5.13929	4.91243	0.0001
DCK	P27707	P27707	DCK_HUMAN	Deoxycytidine kinase	-0.0876264	-0.615235	0.265505	0.714766
CALR	P27797	P27797	CALR_HUMAN	Calreticulin	0.127718	0.797386	0.365596	0.615191
PIK3R1	P27986	P27986	P85A_HUMAN	Phosphatidylinositol 3-kinase regulatory subunit alpha	-0.217689	-2.95107	2.2374	0.0152277
PSMB9	P28065	P28065	PSB9_HUMAN	Proteasome subunit beta type-9	-0.0215137	-0.146064	0.0531748	0.9374
EPHA2	P29317	P29317	EPHA2_HUMAN	Ephrin type-A receptor 2	0.0369809	0.155396	0.0567746	0.934735
CRABP2	P29373	P29373	RABP2_HUMAN	Cellular retinoic acid-binding protein 2	-0.604445	-2.27264	1.52741	0.0676212
EEF1D	P29692	P29692	EF1D_HUMAN	Elongation factor 1-delta	-0.00522973	-0.0839279	0.0298295	0.963487
PRDX5	P30044	P30044	PRDX5_HUMAN	Peroxiredoxin-5, mitochondrial	0.471288	4.38801	3.95663	0.000503704
RPL12	P30050	P30050	RL12_HUMAN	Large ribosomal subunit protein uL11	-0.224928	-1.95937	1.23239	0.122109
PDIA3	P30101	P30101	PDIA3_HUMAN	Protein disulfide-isomerase A3	0.233319	1.33659	0.720105	0.321257
FCER1G	P30273	P30273	FCERG_HUMAN	High affinity immunoglobulin epsilon receptor subunit gamma	-0.237725	-0.993845	0.484749	0.490875
WEE1	P30291	P30291	WEE1_HUMAN	Wee1-like protein kinase	0.23581	1.13211	0.575531	0.411069
HLA-F	P30511	P30511	HLAF_HUMAN	HLA class I histocompatibility antigen, alpha chain F	0.149713	0.554599	0.234399	0.741857
AXL	P30530	P30530	UFO_HUMAN	Tyrosine-protein kinase receptor UFO	-0.270988	-0.71719	0.320297	0.654793
SRI	P30626	P30626	SORCN_HUMAN	Sorcin	0.603254	5.59343	5.49499	0
SERPINB1	P30740	P30740	ILEU_HUMAN	Leukocyte elastase inhibitor	0.695675	4.99447	4.72701	9.7561e-05
CORO1A	P31146	P31146	COR1A_HUMAN	Coronin-1A	-0.200905	-1.38012	0.752448	0.30371
RRM2	P31350	P31350	RIR2_HUMAN	Ribonucleoside-diphosphate reductase subunit M2	-0.220075	-0.516557	0.215447	0.76395
SDC4	P31431	P31431	SDC4_HUMAN	Syndecan-4	0.0208915	0.115947	0.0417241	0.947399
HNRNPH1	P31943	P31943	HNRH1_HUMAN	Heterogeneous nuclear ribonucleoprotein H	-0.156443	-2.05106	1.31632	0.101645
S100A11	P31949	P31949	S10AB_HUMAN	Protein S100-A11	0.411429	3.51711	2.8882	0.00326857
ELF1	P32519	P32519	ELF1_HUMAN	ETS-related transcription factor Elf-1	0.153507	1.69041	0.998374	0.191934
LSP1	P33241	P33241	LSP1_HUMAN	Lymphocyte-specific protein 1	-0.163079	-1.37768	0.750619	0.304168
DUT	P33316	P33316	DUT_HUMAN	Deoxyuridine 5'-triphosphate nucleotidohydrolase, mitochondrial	-0.407921	-3.62932	3.02205	0.00238095
CKS2	P33552	P33552	CKS2_HUMAN	Cyclin-dependent kinases regulatory subunit 2	-0.0113874	-0.0559689	0.0196765	0.976462
MCM7	P33993	P33993	MCM7_HUMAN	DNA replication licensing factor MCM7	-0.546123	-1.72243	1.02525	0.183301
EVI2B	P34910	P34910	EVI2B_HUMAN	Protein EVI2B	0.0903521	0.467056	0.191432	0.788942
PFN2	P35080	P35080	PROF2_HUMAN	Profilin-2	0.199186	1.74762	1.04658	0.177383
PTPN7	P35236	P35236	PTN7_HUMAN	Tyrosine-protein phosphatase non-receptor type 7	-0.0264786	-0.0947103	0.033803	0.957152
RPA3	P35244	P35244	RFA3_HUMAN	Replication protein A 14 kDa subunit	0.00528736	0.057548	0.0202442	0.976407
RPL22	P35268	P35268	RL22_HUMAN	Large ribosomal subunit protein eL22	-0.0447232	-0.414161	0.166575	0.814357
FBN1	P35555	P35555	FBN1_HUMAN	Fibrillin-1	-0.32539	-1.12958	0.573819	0.411814
TIMP3	P35625	P35625	TIMP3_HUMAN	Metalloproteinase inhibitor 3	-0.32207	-0.854175	0.398846	0.576895
FUS	P35637	P35637	FUS_HUMAN	RNA-binding protein FUS	-0.330013	-2.78805	2.05893	0.0224
DEK	P35659	P35659	DEK_HUMAN	Protein DEK	-0.187993	-2.11387	1.375	0.0909488
ARL3	P36405	P36405	ARL3_HUMAN	ADP-ribosylation factor-like protein 3	0.504679	5.42711	5.28159	3.6036e-05
NUDT1	P36639	P36639	8ODP_HUMAN	Oxidized purine nucleoside triphosphate hydrolase	-0.337253	-1.2315	0.644279	0.365143
POLR2I	P36954	P36954	RPB9_HUMAN	DNA-directed RNA polymerase II subunit RPB9	-0.374822	-2.25514	1.51033	0.0691111
SERPINF1	P36955	P36955	PEDF_HUMAN	Pigment epithelium-derived factor	-0.301744	-1.55532	0.888036	0.235338
GPX4	P36969	P36969	GPX4_HUMAN	Phospholipid hydroperoxide glutathione peroxidase	0.333545	3.89894	3.34889	0.00129936
TAGLN2	P37802	P37802	TAGL2_HUMAN	Transgelin-2	0.318811	3.15708	2.46905	0.0088377
EIF4A3	P38919	P38919	IF4A3_HUMAN	Eukaryotic initiation factor 4A-III	-0.24527	-2.63819	1.899	0.0297362
CDKN1A	P38936	P38936	CDN1A_HUMAN	Cyclin-dependent kinase inhibitor 1	0.327015	1.42068	0.78307	0.28694
RPS19	P39019	P39019	RS19_HUMAN	Small ribosomal subunit protein eS19	-0.158856	-1.8589	1.14279	0.147705
RPL3	P39023	P39023	RL3_HUMAN	Large ribosomal subunit protein uL3	-0.0524312	-0.496608	0.205681	0.771499
COL18A1	P39060	P39060	COIA1_HUMAN	Collagen alpha-1(XVIII) chain	-0.163288	-0.772802	0.351504	0.626572
FEN1	P39748	P39748	FEN1_HUMAN	Flap endonuclease 1	-0.255502	-2.40083	1.65456	0.051264
CAPG	P40121	P40121	CAPG_HUMAN	Macrophage-capping protein	-0.934653	-4.24424	3.77634	0.000657143
PSMB10	P40306	P40306	PSB10_HUMAN	Proteasome subunit beta type-10	0.0441089	0.278696	0.106673	0.880213
PBX1	P40424	P40424;P40425;P40426	PBX1_HUMAN	Pre-B-cell leukemia transcription factor 1	-0.328705	-3.32187	2.65882	0.00584615
RPL13A	P40429	Q6NVV1;P40429	RL13A_HUMAN	Large ribosomal subunit protein uL13	-0.0507581	-0.454185	0.185307	0.797486
STAT3	P40763	P40763	STAT3_HUMAN	Signal transducer and activator of transcription 3	0.325815	5.60154	5.50539	0
EIF2S3	P41091	Q2VIR3;P41091	IF2G_HUMAN	Eukaryotic translation initiation factor 2 subunit 3	0.0372216	0.588935	0.251878	0.723225
BCL6	P41182	P41182	BCL6_HUMAN	B-cell lymphoma 6 protein	-0.197351	-1.59113	0.916799	0.222691
CETN2	P41208	P41208	CETN2_HUMAN	Centrin-2	1.20328	9.1623	9.85975	0
PTGDS	P41222	P41222	PTGDS_HUMAN	Prostaglandin-H2 D-isomerase	-0.621473	-2.13997	1.39966	0.086885
TMPO	P42166	P42166	LAP2A_HUMAN	Lamina-associated polypeptide 2, isoform alpha	-0.162731	-1.64112	0.957537	0.206845
RPS27	P42677	P42677;Q71UM5	RS27_HUMAN	Small ribosomal subunit protein eS27	-0.15333	-1.1936	0.617722	0.381458
RPL35	P42766	P42766	RL35_HUMAN	Large ribosomal subunit protein uL29	-0.2221	-1.22736	0.641358	0.366902
RANBP1	P43487	P43487	RANG_HUMAN	Ran-specific GTPase-activating protein	-0.0915569	-1.06188	0.528709	0.447867
NAMPT	P43490	P43490	NAMPT_HUMAN	Nicotinamide phosphoribosyltransferase	0.0118297	0.13645	0.0494916	0.94033
MKI67	P46013	P46013	KI67_HUMAN	Proliferation marker protein Ki-67	0.0232191	0.0673089	0.0237684	0.97224
GSTM5	P46439	P46439	GSTM5_HUMAN	Glutathione S-transferase Mu 5	-0.0496867	-0.202457	0.0753061	0.908941
RPL27A	P46776	P46776	RL27A_HUMAN	Large ribosomal subunit protein uL15	-0.163083	-1.22062	0.636615	0.369881
RPL5	P46777	P46777	RL5_HUMAN	Large ribosomal subunit protein uL18	-0.151798	-1.46226	0.814944	0.272511
RPL21	P46778	P46778	RL21_HUMAN	Large ribosomal subunit protein eL21	-0.171113	-1.12036	0.567598	0.415415
RPL28	P46779	P46779	RL28_HUMAN	Large ribosomal subunit protein eL28	-0.0289143	-0.220031	0.0823883	0.900709
RPS9	P46781	P46781	RS9_HUMAN	Small ribosomal subunit protein uS4	-0.285101	-2.29316	1.54752	0.0650881
RPS5	P46782	P46782	RS5_HUMAN	Small ribosomal subunit protein uS7	-0.122077	-1.25953	0.664194	0.352104
RPS10	P46783	P46783	RS10_HUMAN	Small ribosomal subunit protein eS10	-0.135593	-1.65665	0.970331	0.20338
CAPZB	P47756	P47756	CAPZB_HUMAN	F-actin-capping protein subunit beta	0.0258438	0.667816	0.293372	0.681731
RPL29	P47914	P47914	RL29_HUMAN	Large ribosomal subunit protein eL29	0.0229385	0.175428	0.0645859	0.920223
ID4	P47928	P47928	ID4_HUMAN	DNA-binding protein inhibitor ID-4	-0.267226	-2.16403	1.42253	0.0826761
ZFP36L2	P47974	Q07352;P47974	TISD_HUMAN	mRNA decay activator protein ZFP36L2	-0.134722	-1.1843	0.611272	0.385118
RFX3	P48380	P48378;P48380	RFX3_HUMAN	Transcription factor RFX3	0.793556	8.82572	9.47448	0
IDH2	P48735	P48735	IDHP_HUMAN	Isocitrate dehydrogenase [NADP], mitochondrial	0.361693	1.71951	1.02278	0.183955
ADGRE5	P48960	P48960	AGRE5_HUMAN	Adhesion G protein-coupled receptor E5	0.273718	2.99534	2.28663	0.0137286
RPL34	P49207	P49207	RL34_HUMAN	Large ribosomal subunit protein eL34	-0.147729	-1.69111	0.998958	0.192155
CENPF	P49454	P49454	CENPF_HUMAN	Centromere protein F	-0.107744	-0.224295	0.0841198	0.899414
CEBPD	P49716	P49716	CEBPD_HUMAN	CCAAT/enhancer-binding protein delta	0.520671	1.21261	0.630991	0.372699
GZMK	P49863	P49863	GRAK_HUMAN	Granzyme K	-0.113493	-0.318698	0.123803	0.860102
SELENOP	P49908	P49908	SEPP1_HUMAN	Selenoprotein P	-0.013734	-0.0418682	0.0146382	0.980378
CRIP1	P50238	P50238	CRIP1_HUMAN	Cysteine-rich protein 1	0.304402	0.365437	0.14441	0.835072
GDI2	P50395	P50395	GDIB_HUMAN	Rab GDP dissociation inhibitor beta	-0.0722239	-1.65074	0.965456	0.203634
SERPINB9	P50453	P50453	SPB9_HUMAN	Serpin B9	-0.229782	-1.36405	0.740449	0.309917
SERPINH1	P50454	P50454	SERPH_HUMAN	Serpin H1	-0.696935	-4.84549	4.53666	0.000190476
BCAM	P50895	P50895	BCAM_HUMAN	Basal cell adhesion molecule	-1.3684	-5.01884	4.75818	9.83607e-05
RPL14	P50914	P50914	RL14_HUMAN	Large ribosomal subunit protein eL14	-0.0860018	-0.83468	0.387322	0.591137
FABP6	P51161	P51161	FABP6_HUMAN	Gastrotropin	1.21444	4.16246	3.67434	0.000722222
LUM	P51884	Cont_Q05443;P51884	LUM_HUMAN	Lumican	-0.219216	-0.637467	0.277186	0.702444
CNN1	P51911	P51911	CNN1_HUMAN	Calponin-1	-0.827637	-1.51784	0.858306	0.250135
HNRNPA3	P51991	P51991	ROA3_HUMAN	Heterogeneous nuclear ribonucleoprotein A3	0.162588	1.83911	1.12545	0.15018
KPNA2	P52292	P52292	IMA1_HUMAN	Importin subunit alpha-1	-0.101529	-0.421001	0.169743	0.810973
ARHGDIB	P52566	P52566	GDIR2_HUMAN	Rho GDP-dissociation inhibitor 2	0.131076	1.14259	0.58264	0.406599
SMS	P52788	P52788	SPSY_HUMAN	Spermine synthase	-0.035941	-0.361708	0.142742	0.835884
EFNB2	P52799	P52799	EFNB2_HUMAN	Ephrin-B2	-0.13177	-0.513122	0.213757	0.765725
FOSB	P53539	P53539	FOSB_HUMAN	Protein FosB	-0.323991	-1.17943	0.6079	0.387052
AP2S1	P53680	P53680	AP2S1_HUMAN	AP-2 complex subunit sigma	-0.0336266	-0.419201	0.168908	0.811261
CRISP3	P54108	P54108	CRIS3_HUMAN	Cysteine-rich secretory protein 3	0.875333	2.70501	1.9698	0.0262523
ATP1B3	P54709	P54709	AT1B3_HUMAN	Sodium/potassium-transporting ATPase subunit beta-3	0.302644	1.55152	0.885001	0.236518
PRRX1	P54821	Q8N693;O15266;P54821;Q99811;Q99453;O95076;Q9Y2V3;O60902;Q96IS3;Q5XKR4;O14813;Q96QS3;A6NNA5;Q9H161;A6NJT0;Q15699	PRRX1_HUMAN	Paired mesoderm homeobox protein 1	-0.399672	-0.818761	0.377997	0.599413
EMP3	P54852	P54852	EMP3_HUMAN	Epithelial membrane protein 3	0.0288088	0.130311	0.0471537	0.943081
SLC12A2	P55011	P55011	S12A2_HUMAN	Solute carrier family 12 member 2	1.01492	4.15951	3.67066	0.000744828
RRAD	P55042	P55042	RAD_HUMAN	GTP-binding protein RAD	0.483986	2.24029	1.49589	0.0705839
MFAP4	P55083	P55083	MFAP4_HUMAN	Microfibril-associated glycoprotein 4	-0.0882121	-0.23227	0.0873725	0.899765
MANF	P55145	P55145	MANF_HUMAN	Mesencephalic astrocyte-derived neurotrophic factor	0.803105	3.58504	2.96907	0.00272189
AFDN	P55196	P55196	AFAD_HUMAN	Afadin	-0.00483939	-0.0973307	0.0347736	0.95871
CDKN2D	P55273	P55273	CDN2D_HUMAN	Cyclin-dependent kinase 4 inhibitor D	-0.0119893	-0.0546022	0.0191858	0.976228
FCGRT	P55899	P55899	FCGRN_HUMAN	IgG receptor FcRn large subunit p51	-0.258949	-1.56503	0.8958	0.233254
ATP5MF	P56134	P56134	ATPK_HUMAN	ATP synthase subunit f, mitochondrial	0.158638	1.39056	0.760284	0.299324
ATP5F1E;ATP5F1EP2	P56381;Q5VTU8	Q5VTU8;P56381	AT5EL_HUMAN;ATP5E_HUMAN	ATP synthase subunit epsilon, mitochondrial	-0.306676	-0.880735	0.41473	0.559652
ATP5ME	P56385	P56385	ATP5I_HUMAN	ATP synthase subunit e, mitochondrial	0.0892839	0.607723	0.261591	0.71545
ARL4C	P56559	P56559	ARL4C_HUMAN	ADP-ribosylation factor-like protein 4C	-0.348195	-1.65759	0.971109	0.203564
NME5	P56597	P56597	NDK5_HUMAN	Nucleoside diphosphate kinase homolog 5	2.25651	6.96833	7.23977	0
RP1	P56715	P56715	RP1_HUMAN	Oxygen-regulated protein 1	2.33784	7.79574	8.25678	0
CFAP298	P57076	P57076	CF298_HUMAN	Cilia- and flagella-associated protein 298	1.1168	10.8745	11.7203	0
MLF1	P58340	P58340	MLF1_HUMAN	Myeloid leukemia factor 1	2.56689	7.72862	8.17549	0
C21orf58	P58505	P58505	CU058_HUMAN	Uncharacterized protein C21orf58	2.46588	8.58644	9.19672	0
GNG2	P59768	P59768	GBG2_HUMAN	Guanine nucleotide-binding protein G(I)/G(S)/G(O) subunit gamma-2	-0.198126	-0.794072	0.363686	0.616894
SEC61G	P60059	P60059	SC61G_HUMAN	Protein transport protein Sec61 subunit gamma	-0.0689655	-0.478899	0.197111	0.779804
TPI1	P60174	P60174	TPIS_HUMAN	Triosephosphate isomerase	-0.343762	-2.20761	1.46428	0.0761007
EIF3E	P60228	P60228	EIF3E_HUMAN	Eukaryotic translation initiation factor 3 subunit E	-0.00890827	-0.180781	0.0666922	0.91918
RPS20	P60866	P60866	RS20_HUMAN	Small ribosomal subunit protein uS10	-0.161567	-1.1406	0.58129	0.406959
CKS1B	P61024	P61024	CKS1_HUMAN	Cyclin-dependent kinases regulatory subunit 1	0.00566874	0.0289468	0.0100693	0.984411
CXCR4	P61073	P61073	CXCR4_HUMAN	C-X-C chemokine receptor type 4	-0.189218	-0.834028	0.386939	0.590613
RAP2B	P61225	P61225;Q9Y3L5;P10114	RAP2B_HUMAN	Ras-related protein Rap-2b	-0.0943924	-1.35938	0.736971	0.312009
RPS3A	P61247	P61247	RS3A_HUMAN	Small ribosomal subunit protein eS1	-0.183444	-1.80045	1.09186	0.161723
RPL26	P61254	P61254;Q9UNX3	RL26_HUMAN	Large ribosomal subunit protein uL24	-0.316497	-3.45767	2.81788	0.00384181
RPL15	P61313	P61313	RL15_HUMAN	Large ribosomal subunit protein eL15	-0.118565	-0.975913	0.473393	0.498365
RPL27	P61353	P61353	RL27_HUMAN	Large ribosomal subunit protein eL27	-0.163993	-1.94192	1.21665	0.126382
RPL37A	P61513	P61513;A6NKH3	RL37A_HUMAN	Large ribosomal subunit protein eL43	-0.00336356	-0.0211327	0.00732849	0.988065
RHOA	P61586	P61586	RHOA_HUMAN	Transforming protein RhoA	0.131144	1.48031	0.828927	0.264978
B2M	P61769	P61769	B2MG_HUMAN	Beta-2-microglobulin	0.108574	0.522665	0.218461	0.762119
GNG11;GNGT1	P61952;P63211	P63211;P61952	GBG11_HUMAN;GBG1_HUMAN	Guanine nucleotide-binding protein G(I)/G(S)/G(O) subunit gamma-11	0.12812	0.561181	0.237723	0.738565
LMO4	P61968	P61968	LMO4_HUMAN	LIM domain transcription factor LMO4	0.0984614	0.69953	0.310582	0.662126
PPP1CA	P62136	P62136	PP1A_HUMAN	Serine/threonine-protein phosphatase PP1-alpha catalytic subunit	-0.214832	-2.79115	2.06228	0.0224601
RPS8	P62241	P62241	RS8_HUMAN	Small ribosomal subunit protein eS8	-0.111626	-1.06464	0.530518	0.446475
RPS15A	P62244	P62244	RS15A_HUMAN	Small ribosomal subunit protein uS8	-0.206525	-2.11779	1.37869	0.0903151
RPS16	P62249	P62249	RS16_HUMAN	Small ribosomal subunit protein uS9	-0.270238	-2.8006	2.07251	0.0221043
RPS14	P62263	P62263	RS14_HUMAN	Small ribosomal subunit protein uS11	-0.130553	-1.32816	0.713903	0.324027
RPS23	P62266	P62266	RS23_HUMAN	Small ribosomal subunit protein uS12	-0.0740537	-0.63007	0.273283	0.704796
RPS18	P62269	P62269	RS18_HUMAN	Small ribosomal subunit protein uS13	-0.166558	-2.05462	1.31962	0.100964
RPS29	P62273	P62273	RS29_HUMAN	Small ribosomal subunit protein uS14	-0.281398	-1.27134	0.672649	0.348114
RPS13	P62277	P62277	RS13_HUMAN	Small ribosomal subunit protein uS15	-0.179584	-1.88143	1.16267	0.140879
SNRPD1	P62314	P62314	SMD1_HUMAN	Small nuclear ribonucleoprotein Sm D1	-0.132404	-1.85619	1.14042	0.14811
TMSB4X	P62328	P62328	TYB4_HUMAN	Thymosin beta-4	-0.702781	-1.6513	0.965919	0.203968
RPL7A	P62424	P62424	RL7A_HUMAN	Large ribosomal subunit protein eL8	-0.101094	-0.931358	0.445593	0.528023
YPEL5	P62699	P62699	YPEL5_HUMAN	Protein yippee-like 5	0.34908	1.55593	0.88852	0.235694
RPS4X	P62701	P62701;Q8TD47	RS4X_HUMAN	Small ribosomal subunit protein eS4, X isoform	-0.16034	-1.54955	0.883435	0.236273
ACTA2	P62736	Cont_P68138;P62736;P68133;P63267;P68032	ACTA_HUMAN	Actin, aortic smooth muscle	0.00222365	0.00974183	0.00336317	0.994834
RHOB	P62745	P62745	RHOB_HUMAN	Rho-related GTP-binding protein RhoB	0.467536	2.25914	1.51422	0.0687584
RPL23A	P62750	P62750	RL23A_HUMAN	Large ribosomal subunit protein uL23	-0.0394533	-0.43726	0.177328	0.806338
RPS6	P62753	P62753	RS6_HUMAN	Small ribosomal subunit protein eS6	-0.206261	-2.00782	1.27649	0.111156
RAN	P62826	P62826	RAN_HUMAN	GTP-binding nuclear protein Ran	-0.0697191	-0.777094	0.353951	0.625248
RPL23	P62829	P62829	RL23_HUMAN	Large ribosomal subunit protein uL14	-0.252635	-2.16196	1.42055	0.0827088
RPS15	P62841	P62841	RS15_HUMAN	Small ribosomal subunit protein uS19	-0.276839	-2.17903	1.43685	0.0805957
RPS24	P62847	P62847	RS24_HUMAN	Small ribosomal subunit protein eS24	-0.00412413	-0.0296534	0.0103179	0.985093
RPS25	P62851	P62851	RS25_HUMAN	Small ribosomal subunit protein eS25	-0.20624	-1.71237	1.01677	0.185181
RPS26	P62854	Q5JNZ5;P62854	RS26_HUMAN	Small ribosomal subunit protein eS26	-0.89305	-1.65661	0.970297	0.20284
RPS28	P62857	P62857	RS28_HUMAN	Small ribosomal subunit protein eS28	-0.189234	-2.06761	1.3317	0.0983522
RPL30	P62888	P62888	RL30_HUMAN	Large ribosomal subunit protein eL30	-0.201436	-2.08779	1.35053	0.0960136
RPL39;RPL39P5	P62891;Q59GN2	P62891;Q59GN2	R39L5_HUMAN;RL39_HUMAN	Large ribosomal subunit protein eL39	0.00444241	0.0350754	0.0122306	0.983055
RPL31	P62899	P62899	RL31_HUMAN	Large ribosomal subunit protein eL31	-0.163926	-1.74774	1.04668	0.177884
RPL10A	P62906	P62906	RL10A_HUMAN	Large ribosomal subunit protein uL1	-0.117008	-1.22369	0.638773	0.368518
RPL32	P62910	P62910	RL32_HUMAN	Large ribosomal subunit protein eL32	-0.0197971	-0.14161	0.0514652	0.937415
RPL11	P62913	P62913	RL11_HUMAN	Large ribosomal subunit protein uL5	-0.110037	-1.52143	0.861138	0.249015
RPL8	P62917	P62917	RL8_HUMAN	Large ribosomal subunit protein uL2	-0.160622	-1.33246	0.717066	0.323055
PPIA	P62937	P62937	PPIA_HUMAN	Peptidyl-prolyl cis-trans isomerase A	-0.310765	-3.07225	2.37288	0.0112539
RPS27A	P62979	P0CG47;P0CG48;P62979;P62987	RS27A_HUMAN	Ubiquitin-ribosomal protein eS31 fusion protein	-0.084363	-0.993123	0.48429	0.490438
DYNLL1	P63167	P63167;Q96FJ2	DYL1_HUMAN	Dynein light chain 1, cytoplasmic	0.834376	4.71352	4.36855	0.000248062
DYNLT1	P63172	P63172	DYLT1_HUMAN	Dynein light chain Tctex-type 1	0.717082	6.63915	6.82702	0
RPL38	P63173	P63173	RL38_HUMAN	Large ribosomal subunit protein eL38	-0.129069	-0.923959	0.441034	0.532548
SKP1	P63208	P63208	SKP1_HUMAN	S-phase kinase-associated protein 1	0.268618	4.01446	3.49091	0.000927152
RPS21	P63220	P63220	RS21_HUMAN	Small ribosomal subunit protein eS21	-0.19553	-2.16449	1.42296	0.0828551
RACK1	P63244	P63244	RACK1_HUMAN	Small ribosomal subunit protein RACK1	-0.220832	-2.66719	1.92963	0.028069
TPM4	P67936	Cont_Q5KR48;P07951;P09493;P06753;P67936	TPM4_HUMAN	Tropomyosin alpha-4 chain	-0.238573	-2.1585	1.41725	0.0831748
TUBB4B	P68371	Q3ZCM7;P68371	TBB4B_HUMAN	Tubulin beta-4B chain	0.932996	10.3349	11.1518	0
CLDN10	P78369	P78369	CLD10_HUMAN	Claudin-10	0.719205	3.19136	2.50822	0.00810582
ADAM17	P78536	P78536	ADA17_HUMAN	Disintegrin and metalloproteinase domain-containing protein 17	0.102839	1.33179	0.716572	0.322739
ELF3	P78545	P78545	ELF3_HUMAN	ETS-related transcription factor Elf-3	-0.0294046	-0.217161	0.0812254	0.90207
CCL20	P78556	P78556	CCL20_HUMAN	C-C motif chemokine 20	0	NaN	NaN	1
NUCB2	P80303	P80303	NUCB2_HUMAN	Nucleobindin-2	0.986755	6.32941	6.43521	0
RPL24	P83731	P83731	RL24_HUMAN	Large ribosomal subunit protein eL24	-0.144225	-1.19728	0.62028	0.380544
RPL36A	P83881	P83881;Q969Q0	RL36A_HUMAN	Large ribosomal subunit protein eL42	-0.0441666	-0.271051	0.103452	0.884139
RHOG	P84095	P84095	RHOG_HUMAN	Rho-related GTP-binding protein RhoG	-0.0895455	-1.12554	0.571085	0.41396
RPL19	P84098	P84098	RL19_HUMAN	Large ribosomal subunit protein eL19	-0.0587172	-0.486611	0.200832	0.776812
SRSF3	P84103	P84103	SRSF3_HUMAN	Serine/arginine-rich splicing factor 3	-0.198011	-1.42563	0.786838	0.286423
RBM3	P98179	P98179	RBM3_HUMAN	RNA-binding protein 3	0.0288121	0.25347	0.0961088	0.890663
CYCS	P99999	P99999	CYC_HUMAN	Cytochrome c	0.10627	0.51911	0.216705	0.764138
SET	Q01105	P0DME0;Q01105	SET_HUMAN	Protein SET	-0.179914	-1.74426	1.04372	0.177673
SRSF2	Q01130	Q01130	SRSF2_HUMAN	Serine/arginine-rich splicing factor 2	-0.158646	-1.47222	0.822649	0.26802
FABP5	Q01469	Q01469	FABP5_HUMAN	Fatty acid-binding protein 5	-0.630687	-2.28309	1.53764	0.0662814
IFITM3	Q01628	Q01628;Q01629;P13164	IFM3_HUMAN	Interferon-induced transmembrane protein 3	0.0495482	0.261575	0.0994829	0.885978
TAGLN	Q01995	Q01995	TAGL_HUMAN	Transgelin	-0.26772	-0.716879	0.320125	0.654003
RPL18A	Q02543	Q02543	RL18A_HUMAN	Large ribosomal subunit protein eL20	-0.0944807	-0.725584	0.324947	0.652069
PLOD1	Q02809	Q02809	PLOD1_HUMAN	Procollagen-lysine,2-oxoglutarate 5-dioxygenase 1	-0.45813	-4.17025	3.68403	0.000732394
RPL6	Q02878	Q02878	RL6_HUMAN	Large ribosomal subunit protein eL6	-0.172147	-1.73321	1.03435	0.180113
CAV1	Q03135	Q03135	CAV1_HUMAN	Caveolin-1	-0.393611	-0.983832	0.478396	0.494952
TNFAIP2	Q03169	Q03169	TNAP2_HUMAN	Tumor necrosis factor alpha-induced protein 2	-0.132957	-0.593546	0.254252	0.722532
PLAUR	Q03405	Q03405	UPAR_HUMAN	Urokinase plasminogen activator surface receptor	0.105987	0.61216	0.263901	0.713957
EMX2	Q04743	Q04741;Q04743	EMX2_HUMAN	Homeobox protein EMX2	-0.253449	-1.21644	0.633674	0.371814
REL	Q04864	Q04864	REL_HUMAN	Proto-oncogene c-Rel	-0.00987029	-0.128169	0.0463402	0.942266
PLP2	Q04941	Q04941	PLP2_HUMAN	Proteolipid protein 2	0.52312	3.92504	3.38087	0.00123077
CALD1	Q05682	Q05682	CALD1_HUMAN	Caldesmon	-0.802689	-3.06512	2.36484	0.0114227
CTDSPL2	Q05D32	Q05D32	CTSL2_HUMAN	CTD small phosphatase-like protein 2	-0.5984	-3.19639	2.51398	0.00795745
PAX8	Q06710	Q06710	PAX8_HUMAN	Paired box protein Pax-8	-0.82383	-6.76985	6.99138	0
PRDX1	Q06830	Q06830	PRDX1_HUMAN	Peroxiredoxin-1	0.118803	1.45679	0.81072	0.274523
RPL18	Q07020	Q07020	RL18_HUMAN	Large ribosomal subunit protein eL18	-0.112183	-1.1838	0.610926	0.384686
ZFP36L1	Q07352	Q07352	TISB_HUMAN	mRNA decay activator protein ZFP36L1	0.224139	0.637165	0.277026	0.701567
DPT	Q07507	Q07507	DERM_HUMAN	Dermatopontin	-0.269543	-0.756421	0.342215	0.636388
TFF3	Q07654	Q07654	TFF3_HUMAN	Trefoil factor 3	1.90881	3.74373	3.1599	0.00192593
MCL1	Q07820	Q07820	MCL1_HUMAN	Induced myeloid leukemia cell differentiation protein Mcl-1	-0.410433	-2.47264	1.72731	0.0429474
LRP1	Q07954	Q07954	LRP1_HUMAN	Prolow-density lipoprotein receptor-related protein 1	-0.462734	-2.79446	2.06586	0.0223208
MFGE8	Q08431	Q08431	MFGM_HUMAN	Lactadherin	-0.131057	-0.613147	0.264415	0.714184
MZT1	Q08AG7	Q08AG7	MZT1_HUMAN	Mitotic-spindle organizing protein 1	0.0716817	0.769368	0.34955	0.627391
BST2	Q10589	Q10589	BST2_HUMAN	Bone marrow stromal antigen 2	-0.672844	-2.25476	1.50995	0.0689594
AKAP13	Q12802	Q12802	AKP13_HUMAN	A-kinase anchor protein 13	0.0351175	0.728597	0.326622	0.65297
EFEMP1	Q12805	Q12805	FBLN3_HUMAN	EGF-containing fibulin-like extracellular matrix protein 1	-0.335901	-1.16962	0.601139	0.39163
TROAP	Q12815	Q12815	TROAP_HUMAN	Tastin	-0.0534816	-0.369612	0.146282	0.832731
CDC20	Q12834	Q12834	CDC20_HUMAN	Cell division cycle protein 20 homolog	-0.104841	-0.371105	0.146952	0.834898
FSTL1	Q12841	Q12841	FSTL1_HUMAN	Follistatin-related protein 1	-0.289439	-1.3558	0.734309	0.312708
OVGP1	Q12889	Q12889	OVGP1_HUMAN	Oviduct-specific glycoprotein	3.61754	5.39649	5.2423	3.53982e-05
STK4	Q13043	Q13043	STK4_HUMAN	Serine/threonine-protein kinase 4	0.0651262	1.48163	0.829954	0.265757
IK	Q13123	Q13123	RED_HUMAN	Protein Red	-0.0637562	-1.32158	0.709079	0.326982
CBX3	Q13185	Q13185	CBX3_HUMAN	Chromobox protein homolog 3	-0.262504	-3.02137	2.31572	0.0130204
SEMA3B	Q13214	Q13214	SEM3B_HUMAN	Semaphorin-3B	-0.138042	-0.325578	0.126796	0.856514
PAPPA	Q13219	Q13219	PAPP1_HUMAN	Pappalysin-1	-0.141604	-0.562297	0.238287	0.738786
SELENBP1	Q13228	Q13228	SBP1_HUMAN	Methanethiol oxidase	0.0853434	0.715074	0.319128	0.653482
MAD2L1	Q13257	Q13257	MD2L1_HUMAN	Mitotic spindle assembly checkpoint protein MAD2A	-0.371964	-2.06978	1.33372	0.0984615
PPP2R5C	Q13362	Q13362	2A5G_HUMAN	Serine/threonine-protein phosphatase 2A 56 kDa regulatory subunit gamma isoform	0.454695	2.70284	1.96748	0.02608
MSLN	Q13421	Q13421	MSLN_HUMAN	Mesothelin	-0.809918	-3.86222	3.30399	0.0014
SQSTM1	Q13501	Q13501	SQSTM_HUMAN	Sequestosome-1	0.041111	0.373466	0.148014	0.834038
FHL1	Q13642	Q13642	FHL1_HUMAN	Four and a half LIM domains protein 1	-0.131451	-0.549717	0.231943	0.743803
RUNX3	Q13761	Q13761	RUNX3_HUMAN	Runt-related transcription factor 3	0.0689616	0.21391	0.0799112	0.903482
CAPS	Q13938	Q13938	CAYP1_HUMAN	Calcyphosin	1.80623	9.02298	9.70105	0
COTL1	Q14019	Q14019	COTL1_HUMAN	Coactosin-like protein	-0.356377	-2.38515	1.63881	0.0529243
COX17	Q14061	Q14061	COX17_HUMAN	Cytochrome c oxidase copper chaperone	-0.176338	-0.98155	0.476952	0.495641
ENDOG	Q14249	Q14249	NUCG_HUMAN	Endonuclease G, mitochondrial	1.41326	8.82863	9.47783	0
GAS6	Q14393	Q14393	GAS6_HUMAN	Growth arrest-specific protein 6	-0.215178	-2.06853	1.33255	0.0984
SLBP	Q14493	Q14493	SLBP_HUMAN	Histone RNA hairpin-binding protein	-0.0127738	-0.051167	0.0179546	0.976511
WFDC2	Q14508	Q14508	WFDC2_HUMAN	WAP four-disulfide core domain protein 2	0.244714	0.913432	0.434576	0.539335
SPARCL1	Q14515	Q14515	SPRL1_HUMAN	SPARC-like protein 1	0.55234	2.03177	1.2985	0.105673
MELK	Q14680	Q14680	MELK_HUMAN	Maternal embryonic leucine zipper kinase	0.131575	0.307669	0.119034	0.867467
STAT4	Q14765	Q14765	STAT4_HUMAN	Signal transducer and activator of transcription 4	-0.185613	-0.900406	0.426631	0.545878
LTBP1	Q14766	Q14766	LTBP1_HUMAN	Latent-transforming growth factor beta-binding protein 1	0.387405	0.913026	0.434328	0.538642
FXYD3	Q14802	Q14802	FXYD3_HUMAN	FXYD domain-containing ion transport regulator 3	0.352278	1.57212	0.901487	0.23078
KIF22	Q14807	Q14807	KIF22_HUMAN	Kinesin-like protein KIF22	-0.177088	-0.736155	0.330834	0.648883
ARID5B	Q14865	Q14865	ARI5B_HUMAN	AT-rich interactive domain-containing protein 5B	-0.22872	-0.833623	0.386701	0.589916
GPNMB	Q14956	Q14956	GPNMB_HUMAN	Transmembrane glycoprotein NMB	-0.37143	-1.03365	0.510299	0.465261
PCLAF	Q15004	Q15004	PAF15_HUMAN	PCNA-associated factor	0	NaN	NaN	1
WTAP	Q15007	Q15007	FL2D_HUMAN	Pre-mRNA-splicing regulator WTAP	-0.0836676	-1.28035	0.679126	0.345225
HERPUD1	Q15011	Q15011	HERP1_HUMAN	Homocysteine-responsive endoplasmic reticulum-resident ubiquitin-like domain member 1 protein	0.0243603	0.129081	0.0466865	0.942811
MORF4L2	Q15014	Q15014	MO4L2_HUMAN	Mortality factor 4-like protein 2	0.027843	0.534115	0.224141	0.756506
ACAP1	Q15027	Q15027	ACAP1_HUMAN	Arf-GAP with coiled-coil, ANK repeat and PH domain-containing protein 1	0.193366	1.68828	0.996591	0.19222
ARL6IP1	Q15041	Q15041	AR6P1_HUMAN	ADP-ribosylation factor-like protein 6-interacting protein 1	0.273799	1.6137	0.935109	0.215411
POSTN	Q15063	Q15063	POSTN_HUMAN	Periostin	0.2944	0.6951	0.30816	0.664762
PAFAH1B3	Q15102	Q15102	PA1B3_HUMAN	Platelet-activating factor acetylhydrolase IB subunit alpha1	-0.596328	-4.10569	3.60379	0.000810811
PCOLCE	Q15113	Q15113	PCOC1_HUMAN	Procollagen C-endopeptidase enhancer 1	-0.333321	-1.56328	0.894396	0.23287
EBP	Q15125	Q15125	EBP_HUMAN	3-beta-hydroxysteroid-Delta(8),Delta(7)-isomerase	-0.179947	-1.29676	0.69099	0.337082
PPA1	Q15181	Q15181	IPYR_HUMAN	Inorganic pyrophosphatase	-0.108587	-0.748408	0.3377	0.642218
PTGES3	Q15185	Q15185	TEBP_HUMAN	Prostaglandin E synthase 3	0.488081	4.24884	3.78208	0.000661871
ELOC	Q15369	Q15369	ELOC_HUMAN	Elongin-C	0.280768	3.22096	2.54217	0.00771892
ELOB	Q15370	Q15370	ELOB_HUMAN	Elongin-B	-0.0257854	-0.262156	0.0997254	0.886752
RHEB	Q15382	Q15382	RHEB_HUMAN	GTP-binding protein Rheb	-0.216332	-2.02336	1.29075	0.107531
DHCR24	Q15392	Q15392	DHC24_HUMAN	Delta(24)-sterol reductase	-0.995382	-2.91149	2.19366	0.0168867
DLGAP5	Q15398	Q15398	DLGP5_HUMAN	Disks large-associated protein 5	-0.560371	-1.55022	0.883969	0.236466
CNN3	Q15417	Q15417	CNN3_HUMAN	Calponin-3	-0.0105188	-0.106012	0.0380028	0.954065
SEC23A	Q15436	Q15436	SC23A_HUMAN	Protein transport protein Sec23A	0.0560204	0.785545	0.358785	0.619943
SPA17	Q15506	Q15506	SP17_HUMAN	Sperm surface protein Sp17	2.37732	10.6539	11.4898	0
TGIF1	Q15583	Q15583	TGIF1_HUMAN	Homeobox protein TGIF1	-0.245159	-1.12101	0.568035	0.415647
HMGN3	Q15651	Q15651	HMGN3_HUMAN	High mobility group nucleosome-binding domain-containing protein 3	-0.156888	-0.339531	0.132909	0.84681
MAPRE1	Q15691	Q15691	MARE1_HUMAN	Microtubule-associated protein RP/EB family member 1	0.0531347	0.60324	0.259264	0.715941
TSC22D1	Q15714	Q15714;O75157	T22D1_HUMAN	TSC22 domain family protein 1	-0.428009	-3.20875	2.52815	0.00782796
MYLK	Q15746	Q15746	MYLK_HUMAN	Myosin light chain kinase, smooth muscle	0.0877692	0.485437	0.200264	0.775472
CST6	Q15828	Q15828	CYTM_HUMAN	Cystatin-M	0.558855	1.76082	1.05782	0.174332
ADIRF	Q15847	Q15847	ADIRF_HUMAN	Adipogenesis regulatory factor	-0.939467	-2.3038	1.55798	0.0638462
EZH2	Q15910	Q15910	EZH2_HUMAN	Histone-lysine N-methyltransferase EZH2	-0.163494	-0.565018	0.239666	0.738846
IGFBP7	Q16270	Q16270	IBP7_HUMAN	Insulin-like growth factor-binding protein 7	0.353209	3.22973	2.55225	0.00758696
LAMA4	Q16363	Q16363	LAMA4_HUMAN	Laminin subunit alpha-4	-0.0281394	-0.0675288	0.0238481	0.973282
RBBP7	Q16576	Q16576	RBBP7_HUMAN	Histone-binding protein RBBP7	0.145679	1.81856	1.10754	0.156738
ECM1	Q16610	Q16610	ECM1_HUMAN	Extracellular matrix protein 1	-0.184274	-0.694898	0.30805	0.663796
SRSF7	Q16629	Q16629	SRSF7_HUMAN	Serine/arginine-rich splicing factor 7	-0.0525766	-0.718373	0.320951	0.655979
PDK4	Q16654	Q16654	PDK4_HUMAN	[Pyruvate dehydrogenase (acetyl-transferring)] kinase isozyme 4, mitochondrial	0.405305	1.71259	1.01696	0.185609
IFI16	Q16666	Q16666	IF16_HUMAN	Gamma-interferon-inducible protein 16	0.0344439	0.27839	0.106544	0.879223
CYP1B1	Q16678	Q16678	CP1B1_HUMAN	Cytochrome P450 1B1	1.43573	3.56783	2.94853	0.00278363
GSTA3	Q16772	P08263;P09210;Q7RTV2;Q16772	GSTA3_HUMAN	Glutathione S-transferase A3	1.99972	5.24336	5.04584	0.000102564
HYDIN	Q4G0P3	Q4G0P3	HYDIN_HUMAN	Hydrocephalus-inducing protein homolog	1.57697	5.78381	5.73903	0
MORN2	Q502X0	Q502X0	MORN2_HUMAN	MORN repeat-containing protein 2	1.53677	6.20898	6.28211	0
LRRC23	Q53EV4	Q53EV4	LRC23_HUMAN	Leucine-rich repeat-containing protein 23	1.89816	8.87784	9.53455	0
SLC44A4	Q53GD3	Q53GD3	CTL4_HUMAN	Choline transporter-like protein 4	1.64446	9.48406	10.2221	0
CYBRD1	Q53TN4	Q53TN4	CYBR1_HUMAN	Plasma membrane ascorbate-dependent reductase CYBRD1	-0.814248	-3.19084	2.50763	0.00806316
C4orf48	Q5BLP8	Q5BLP8	CD048_HUMAN	Neuropeptide-like protein C4orf48	-0.0711361	-0.306724	0.118627	0.866958
TMEM67	Q5HYA8	Q5HYA8	MKS3_HUMAN	Meckelin	1.008	6.37545	6.49363	0
WDR38	Q5JTN6	Q5JTN6	WDR38_HUMAN	WD repeat-containing protein 38	1.97107	6.96929	7.24097	0
CFAP157	Q5JU67	Q5JU67	CF157_HUMAN	Cilia- and flagella-associated protein 157	1.76694	7.48857	7.88295	0
EFHC1	Q5JVL4	Q5JVL4	EFHC1_HUMAN	EF-hand domain-containing protein 1	1.97906	11.0758	11.9282	0
ERICH3	Q5RHP9	Q5RHP9	ERIC3_HUMAN	Glutamate-rich protein 3	2.37665	9.30802	10.0246	0
CFAP70	Q5T0N1	Q5T0N1	CFA70_HUMAN	Cilia- and flagella-associated protein 70	1.81404	7.60804	8.02889	0
LDLRAD1	Q5T700	Q5T700	LRAD1_HUMAN	Low-density lipoprotein receptor class A domain-containing protein 1	1.13873	4.75816	4.42536	0.000220472
CFAP126	Q5VTH2	Q5VTH2	FLTOP_HUMAN	Protein Flattop	2.83643	8.78184	9.42378	0
TENT5C	Q5VWP2	Q5VWP2	TET5C_HUMAN	Terminal nucleotidyltransferase 5C	0.537155	2.68374	1.94718	0.0270783
MORN5	Q5VZ52	Q5VZ52	MORN5_HUMAN	MORN repeat-containing protein 5	0.896796	3.87826	3.32359	0.00134177
ARMC3	Q5W041	Q5W041	ARMC3_HUMAN	Armadillo repeat-containing protein 3	1.33428	9.52003	10.2622	0
CES4A	Q5XG92	Q5XG92	EST4A_HUMAN	Carboxylesterase 4A	0.957293	4.39571	3.96631	0.000507463
SAXO2	Q658L1	Q658L1	SAXO2_HUMAN	Stabilizer of axonemal microtubules 2	2.18252	9.41682	10.1468	0
SFRP4	Q6FHJ7	Q6FHJ7	SFRP4_HUMAN	Secreted frizzled-related protein 4	-0.093221	-0.32474	0.126431	0.856051
MZT2B	Q6NZ67	Q6P582;Q6NZ67	MZT2B_HUMAN	Mitotic-spindle organizing protein 2B	0.0703662	0.859881	0.40224	0.574254
CAVIN1	Q6NZI2	Q6NZI2	CAVN1_HUMAN	Caveolae-associated protein 1	-0.291226	-0.978152	0.474805	0.497493
NEK5	Q6P3R8	Q6P3R8	NEK5_HUMAN	Serine/threonine-protein kinase Nek5	1.78036	9.39444	10.1217	0
PGM2L1	Q6PCE3	Q6PCE3	PGM2L_HUMAN	Glucose 1,6-bisphosphate synthase	1.1962	7.97445	8.4721	0
PSRC1	Q6PGN9	Q6PGN9	PSRC1_HUMAN	Proline/serine-rich coiled-coil protein 1	-0.286915	-1.35239	0.731779	0.31411
SPAG17	Q6Q759	Q6Q759	SPG17_HUMAN	Sperm-associated antigen 17	1.4412	5.14431	4.91886	0.00010084
RAB11FIP1	Q6WKZ4	Q6WKZ4	RFIP1_HUMAN	Rab11 family-interacting protein 1	0.206273	1.75827	1.05565	0.174965
THSD4	Q6ZMP0	Q6ZMP0	THSD4_HUMAN	Thrombospondin type-1 domain-containing protein 4	-0.047955	-0.195428	0.0724981	0.913723
DNAH12	Q6ZR08	Q6ZR08	DYH12_HUMAN	Dynein axonemal heavy chain 12	0.628082	7.76921	8.22467	0
NBEAL1	Q6ZS30	Q6ZS30	NBEL1_HUMAN	Neurobeachin-like protein 1	0.385853	2.58735	1.8457	0.0330622
C1orf122	Q6ZSJ8	Q6ZSJ8	CA122_HUMAN	Uncharacterized protein C1orf122	-0.0600833	-0.422047	0.170228	0.811294
CDHR3	Q6ZTQ4	Q6ZTQ4	CDHR3_HUMAN	Cadherin-related family member 3	1.62609	6.0025	6.0188	0
TOGARAM2	Q6ZUX3	Q6ZUX3	TGRM2_HUMAN	TOG array regulator of axonemal microtubules protein 2	1.36289	4.22267	3.74939	0.00070922
USP53	Q70EK8	Q70EK8	UBP53_HUMAN	Inactive ubiquitin carboxyl-terminal hydrolase 53	0.110677	1.23577	0.647297	0.365411
CCDC80	Q76M96	Q76M96	CCD80_HUMAN	Coiled-coil domain-containing protein 80	0.693322	2.5617	1.819	0.0350984
CHMP1B	Q7LBR1	Q7LBR1	CHM1B_HUMAN	Charged multivesicular body protein 1b	-0.173046	-1.61364	0.93506	0.214866
KIF21A	Q7Z4S6	Q7Z4S6	KI21A_HUMAN	Kinesin-like protein KIF21A	1.17848	10.4919	11.3189	0
AKNA	Q7Z591	Q7Z591	AKNA_HUMAN	Microtubule organization protein AKNA	1.12866	6.24646	6.3298	0
RBBP6	Q7Z6E9	Q7Z6E9	RBBP6_HUMAN	E3 ubiquitin-protein ligase RBBP6	-0.0940184	-1.61716	0.937925	0.214501
C11orf96	Q7Z7L8	Q7Z7L8	CK096_HUMAN	Uncharacterized protein C11orf96	-0.403939	-1.25905	0.663852	0.351585
OAF	Q86UD1	Q86UD1	OAF_HUMAN	Out at first protein homolog	-0.449148	-1.19779	0.62064	0.380998
AKAP14	Q86UN6	Q86UN6	AKA28_HUMAN	A-kinase anchor protein 14	0.989605	6.56252	6.73037	0
PHLDB1	Q86UU1	Q86UU1	PHLB1_HUMAN	Pleckstrin homology-like domain family B member 1	-0.502257	-2.23977	1.49538	0.0704
AEBP1	Q8IUX7	Q8IUX7	AEBP1_HUMAN	Adipocyte enhancer-binding protein 1	-0.0783538	-0.292723	0.112627	0.873046
MISP	Q8IVT2	Q8IVT2	MISP_HUMAN	Mitotic interactor and substrate of PLK1	0.472379	2.75202	2.0201	0.0241101
CCDC28A	Q8IWP9	Q8IWP9	CC28A_HUMAN	Coiled-coil domain-containing protein 28A	0.533346	4.16824	3.68153	0.000727273
CCDC146	Q8IYE0	Q8IYE0	CC146_HUMAN	Coiled-coil domain-containing protein 146	0.332723	2.51327	1.76895	0.0393143
CCDC170	Q8IYT3	Q8IYT3	CC170_HUMAN	Coiled-coil domain-containing protein 170	2.10365	6.06736	6.10162	0
SELENOH	Q8IZQ5	Q8IZQ5	SELH_HUMAN	Selenoprotein H	-0.263139	-2.24684	1.50225	0.0696703
SPAG16	Q8N0X2	Q8N0X2	SPG16_HUMAN	Sperm-associated antigen 16 protein	1.26897	7.45136	7.83734	0
FAM177A1	Q8N128	Q8N128	F177A_HUMAN	Protein FAM177A1	0.377038	3.05628	2.3549	0.0117128
CFAP52	Q8N1V2	Q8N1V2	CFA52_HUMAN	Cilia- and flagella-associated protein 52	2.20638	11.6998	12.5588	0
LYPD1	Q8N2G4	Q8N2G4	LYPD1_HUMAN	Ly6/PLAUR domain-containing protein 1	-0.464524	-1.71285	1.01718	0.18605
OSR2	Q8N2R0	Q8N2R0	OSR2_HUMAN	Protein odd-skipped-related 2	-0.165792	-0.716331	0.319822	0.653402
LTBP4	Q8N2S1	Q8N2S1	LTBP4_HUMAN	Latent-transforming growth factor beta-binding protein 4	-0.576308	-2.44631	1.70051	0.0455645
RIBC1	Q8N443	Q8N443	RIBC1_HUMAN	RIB43A-like with coiled-coils protein 1	1.55961	7.90476	8.38833	0
SFRP1	Q8N474	Q8N474	SFRP1_HUMAN	Secreted frizzled-related protein 1	-0.0749482	-0.376493	0.149378	0.833663
KCNRG	Q8N5I3	Q8N5I3	KCNRG_HUMAN	Potassium channel regulatory protein	2.29361	9.55395	10.3	0
FAM216B	Q8N7L0	Q8N7L0	F216B_HUMAN	Protein FAM216B	1.9191	8.15959	8.69343	0
HJURP	Q8NCD3	Q8NCD3	HJURP_HUMAN	Holliday junction recognition protein	-0.43301	-1.84492	1.13053	0.149849
DYNC2H1	Q8NCM8	Q8NCM8	DYHC2_HUMAN	Cytoplasmic dynein 2 heavy chain 1	1.15497	8.85623	9.50966	0
CFAP43	Q8NDM7	Q8NDM7	CFA43_HUMAN	Cilia- and flagella-associated protein 43	1.17443	6.32194	6.42572	0
MNS1	Q8NEH6	Q8NEH6	MNS1_HUMAN	Meiosis-specific nuclear structural protein 1	1.69426	10.6416	11.477	0
DNAAF1	Q8NEP3	Q8NEP3	DAAF1_HUMAN	Dynein axonemal assembly factor 1	1.45313	5.32195	5.14665	6.95652e-05
SYNE1	Q8NF91	Q8NF91	SYNE1_HUMAN	Nesprin-1	0.87944	9.07754	9.76334	0
GPRC5A	Q8NFJ5	Q8NFJ5	RAI3_HUMAN	Retinoic acid-induced protein 3	0.0987261	0.191376	0.0708857	0.913684
TSTD1	Q8NFU3	Q8NFU3	TSTD1_HUMAN	Thiosulfate:glutathione sulfurtransferase	0.0743365	0.503534	0.209058	0.769137
STOML3	Q8TAV4	Q8TAV4	STML3_HUMAN	Stomatin-like protein 3	1.65456	9.49323	10.2323	0
FAM174A	Q8TBP5	Q8TBP5	F174A_HUMAN	Membrane protein FAM174A	0.304404	0.689619	0.305171	0.667295
PIFO	Q8TCI5	Q8TCI5	PIFO_HUMAN	Protein pitchfork	1.2594	7.60288	8.0226	0
AGR3	Q8TD06	Q8TD06	AGR3_HUMAN	Anterior gradient protein 3	1.63622	5.58721	5.48701	0
MAPK15	Q8TD08	Q8TD08	MK15_HUMAN	Mitogen-activated protein kinase 15	0.329483	4.00329	3.47713	0.000941176
DNAH5	Q8TE73	Q8TE73;Q96JB1	DYH5_HUMAN	Dynein axonemal heavy chain 5	1.72786	10.1589	10.9629	0
DYNLRB2	Q8TF09	Q8TF09	DLRB2_HUMAN	Dynein light chain roadblock-type 2	2.27383	10.5706	11.4021	0
TSKU	Q8WUA8	Q8WUA8	TSK_HUMAN	Tsukushi	0.111958	0.383494	0.152543	0.828891
SKA2	Q8WVK7	Q8WVK7	SKA2_HUMAN	Spindle and kinetochore-associated protein 2	-0.100696	-0.464923	0.190414	0.789539
DNAJA4	Q8WW22	Q8WW22	DNJA4_HUMAN	DnaJ homolog subfamily A member 4	1.65193	6.98691	7.26294	0
CAPSL	Q8WWF8	Q8WWF8	CAPSL_HUMAN	Calcyphosin-like protein	2.51648	7.34959	7.71231	0
CKAP2	Q8WWK9	Q8WWK9	CKAP2_HUMAN	Cytoskeleton-associated protein 2	-0.248773	-1.40956	0.774629	0.290515
SELENOM	Q8WWX9	Q8WWX9	SELM_HUMAN	Selenoprotein M	-0.677836	-2.74545	2.01305	0.0242192
SYNE2	Q8WXH0	Q8WXH0	SYNE2_HUMAN	Nesprin-2	0.0422461	0.357119	0.140696	0.837654
DNAH7	Q8WXX0	Q8WXX0	DYH7_HUMAN	Dynein axonemal heavy chain 7	0.724228	8.50776	9.1047	0
DNAJC9	Q8WXX5	Q8WXX5	DNJC9_HUMAN	DnaJ homolog subfamily C member 9	-0.236675	-1.82269	1.11114	0.155487
RSPH1	Q8WYR4	Q8WYR4	RSPH1_HUMAN	Radial spoke head 1 homolog	2.17601	11.0066	11.857	0
CLEC2B	Q92478	Q92478	CLC2B_HUMAN	C-type lectin domain family 2 member B	0.0727167	0.243912	0.092154	0.894839
SPOCK2	Q92563	Q92563	TICN2_HUMAN	Testican-2	0.0772518	0.333832	0.130405	0.850337
HSPH1	Q92598	Q92598	HS105_HUMAN	Heat shock protein 105 kDa	1.17155	8.41909	9.00059	0
SORL1	Q92673	Q92673	SORL_HUMAN	Sortilin-related receptor	0.395721	3.39385	2.74284	0.00462222
ANP32B	Q92688	Q92688	AN32B_HUMAN	Acidic leucine-rich nuclear phosphoprotein 32 family member B	0.0519796	0.423175	0.170752	0.811443
GGH	Q92820	Q92820	GGH_HUMAN	Gamma-glutamyl hydrolase	-0.26571	-1.45749	0.811264	0.274696
PMM1	Q92871	Q92871	PMM1_HUMAN	Phosphomannomutase 1	0.884605	7.66334	8.09621	0
FOXJ1	Q92949	Q92949	FOXJ1_HUMAN	Forkhead box protein J1	1.38906	8.95217	9.61998	0
CAVIN3	Q969G5	Q969G5	CAVN3_HUMAN	Caveolae-associated protein 3	-0.0255588	-0.0755273	0.0267561	0.967913
TEKT1	Q969V4	Q969V4	TEKT1_HUMAN	Tektin-1	2.06335	9.83689	10.6126	0
RAD51AP1	Q96B01	Q96B01	R51A1_HUMAN	RAD51-associated protein 1	0.15594	0.584676	0.249691	0.725826
EXOSC8	Q96B26	Q96B26	EXOS8_HUMAN	Exosome complex component RRP43	-0.156876	-1.41728	0.780485	0.2882
SARAF	Q96BY9	Q96BY9	SARAF_HUMAN	Store-operated calcium entry-associated regulatory factor	-0.03594	-0.0827165	0.0293851	0.963191
ROPN1L	Q96C74	Q96C74	ROP1L_HUMAN	Ropporin-1-like protein	2.13175	10.8528	11.6977	0
KCTD12	Q96CX2	Q96CX2	KCD12_HUMAN	BTB/POZ domain-containing protein KCTD12	0.199559	1.11849	0.566336	0.41592
ITPKC	Q96DU7	Q96DU7	IP3KC_HUMAN	Inositol-trisphosphate 3-kinase C	0.196759	0.679594	0.299728	0.673547
IQCD	Q96DY2	Q96DY2	DRC10_HUMAN	Dynein regulatory complex protein 10	2.24055	7.35828	7.72301	0
CDCA5	Q96FF9	Q96FF9	CDCA5_HUMAN	Sororin	-0.302202	-1.56424	0.895163	0.232985
S100A16	Q96FQ6	Q96FQ6	S10AG_HUMAN	Protein S100-A16	0.026788	0.229584	0.086275	0.900803
LRRC46	Q96FV0	Q96FV0	LRC46_HUMAN	Leucine-rich repeat-containing protein 46	1.74857	5.93601	5.93383	0
PERP	Q96FX8	Q96FX8	PERP_HUMAN	p53 apoptosis effector related to PMP-22	-0.0990582	-0.464748	0.19033	0.788463
VMP1	Q96GC9	Q96GC9	VMP1_HUMAN	Vacuole membrane protein 1	0.151064	1.21286	0.631169	0.373359
AURKB	Q96GD4	Q96GD4	AURKB_HUMAN	Aurora kinase B	-0.415252	-2.31179	1.56585	0.0626409
CENPN	Q96H22	Q96H22	CENPN_HUMAN	Centromere protein N	0.128233	0.718276	0.320898	0.654936
DYDC2	Q96IM9	Q96IM9	DYDC2_HUMAN	DPY30 domain-containing protein 2	1.45043	7.22106	7.55371	0
TENT5A	Q96IP4	Q96IP4	TET5A_HUMAN	Terminal nucleotidyltransferase 5A	-0.0497507	-0.15058	0.0549137	0.936047
PBK	Q96KB5	Q96KB5	TOPK_HUMAN	Lymphokine-activated killer T-cell-originated protein kinase	-0.509824	-1.84177	1.12778	0.14991
CNOT6L	Q96LI5	Q9ULM6;Q96LI5	CNO6L_HUMAN	CCR4-NOT transcription complex subunit 6-like	-0.0604265	-0.729677	0.327223	0.653168
CCDC17	Q96LX7	Q96LX7	CCD17_HUMAN	Coiled-coil domain-containing protein 17	2.08848	7.68344	8.12064	0
CFAP53	Q96M91	Q96M91	CFA53_HUMAN	Cilia- and flagella-associated protein 53	1.84213	8.93754	9.60319	0
KIF20B	Q96Q89	Q96Q89	KI20B_HUMAN	Kinesin-like protein KIF20B	-0.330679	-1.41171	0.776256	0.290755
FNBP1	Q96RU3	Q96RU3	FNBP1_HUMAN	Formin-binding protein 1	-0.186815	-2.87987	2.15889	0.0179223
MYADM	Q96S97	Q96S97	MYADM_HUMAN	Myeloid-associated differentiation marker	0.308777	1.30794	0.699121	0.332348
MYCBP	Q99417	Q99417	MYCBP_HUMAN	c-Myc-binding protein	1.19678	11.3592	12.2172	0
CNN2	Q99439	Q99439	CNN2_HUMAN	Calponin-2	-0.231303	-1.35894	0.736643	0.311631
TSC22D3	Q99576	Q99576	T22D3_HUMAN	TSC22 domain family protein 3	-0.580335	-3.35091	2.69264	0.00534807
NDN	Q99608	Q99608	NECD_HUMAN	Necdin	0.0691357	0.356004	0.140199	0.837445
CDCA3	Q99618	Q99618	CDCA3_HUMAN	Cell division cycle-associated protein 3	-0.541682	-1.89101	1.17115	0.138447
C12orf57	Q99622	Q99622	C10_HUMAN	Protein C10	-0.0797864	-0.725161	0.324713	0.651272
CIB1	Q99828	Q99828	CIB1_HUMAN	Calcium and integrin-binding protein 1	0.714391	7.629	8.05443	0
SPAG8	Q99932	Q99932	SPAG8_HUMAN	Sperm-associated antigen 8	2.56769	7.86714	8.343	0
RARRES2	Q99969	Q99969	RARR2_HUMAN	Retinoic acid receptor responder protein 2	-0.333368	-1.15771	0.592961	0.398541
GDF15	Q99988	Q99988	GDF15_HUMAN	Growth/differentiation factor 15	-0.43471	-1.98904	1.25933	0.115547
AKAP9	Q99996	Q99996	AKAP9_HUMAN	A-kinase anchor protein 9	0.453224	7.38529	7.75623	0
HOPX	Q9BPY8	Q9BPY8	HOP_HUMAN	Homeodomain-only protein	0.125039	0.354484	0.139523	0.8375
PAIP2	Q9BPZ3	Q9BPZ3	PAIP2_HUMAN	Polyadenylate-binding protein-interacting protein 2	-0.0444084	-0.246349	0.0931597	0.894077
TUBA1C	Q9BQE3	P68363;Q9BQE3;Q71U36	TBA1C_HUMAN	Tubulin alpha-1C chain	0.620086	5.34136	5.17156	7.01754e-05
MXRA8	Q9BRK3	Q9BRK3	MXRA8_HUMAN	Matrix remodeling-associated protein 8	-0.55602	-1.53994	0.875789	0.240343
CFAP300	Q9BRQ4	Q9BRQ4	CF300_HUMAN	Cilia- and flagella-associated protein 300	1.81098	7.73989	8.18915	0
ARHGAP9	Q9BRR9	Q9BRR9	RHG09_HUMAN	Rho GTPase-activating protein 9	-0.583501	-1.77572	1.07057	0.169971
LIMD2	Q9BT23	Q9BT23	LIMD2_HUMAN	LIM domain-containing protein 2	-0.0394958	-0.177678	0.0654703	0.919469
SPON2	Q9BUD6	Q9BUD6	SPON2_HUMAN	Spondin-2	-0.071119	-0.486416	0.200737	0.775791
TUBB6	Q9BUF5	Q9BUF5;Q13509	TBB6_HUMAN	Tubulin beta-6 chain	-0.081601	-0.400661	0.160364	0.82023
PAXX	Q9BUH6	Q9BUH6	PAXX_HUMAN	Protein PAXX	0.0560518	0.428978	0.173455	0.810081
VAMP8	Q9BV40	Q9BV40	VAMP8_HUMAN	Vesicle-associated membrane protein 8	0.0221955	0.257109	0.0976211	0.888736
DPCD	Q9BVM2	Q9BVM2	DPCD_HUMAN	Protein DPCD	1.046	10.5554	11.3861	0
KIFC1	Q9BW19	Q9BW19	KIFC1_HUMAN	Kinesin-like protein KIFC1	-0.0255217	-0.0650456	0.0229488	0.972882
TPPP3	Q9BW30	Q9BW30	TPPP3_HUMAN	Tubulin polymerization-promoting protein family member 3	2.36402	8.65754	9.27959	0
TMEM59	Q9BXS4	Q9BXS4	TMM59_HUMAN	Transmembrane protein 59	0.489573	1.32286	0.710019	0.326799
NUSAP1	Q9BXS6	Q9BXS6	NUSAP_HUMAN	Nucleolar and spindle-associated protein 1	0.299023	0.941338	0.451768	0.520625
GON7	Q9BXV9	Q9BXV9	GON7_HUMAN	EKC/KEOPS complex subunit GON7	0.15225	1.85571	1.13999	0.147817
PARD6B	Q9BYG5	Q9BYG4;Q9NPB6;Q9BYG5	PAR6B_HUMAN	Partitioning defective 6 homolog beta	-0.19694	-1.59881	0.923014	0.21951
NUF2	Q9BZD4	Q9BZD4	NUF2_HUMAN	Kinetochore protein Nuf2	-0.623173	-2.62643	1.88663	0.0305085
UBL5	Q9BZL1	Q9BZL1	UBL5_HUMAN	Ubiquitin-like protein 5	0.0273782	0.0921072	0.0328408	0.957967
DPY30	Q9C005	Q9C005	DPY30_HUMAN	Protein dpy-30 homolog	0.185235	1.27153	0.672787	0.3487
SPEF2	Q9C093	Q9C093	SPEF2_HUMAN	Sperm flagellar protein 2	1.17755	4.33188	3.8861	0.000554745
DDX24	Q9GZR7	Q9GZR7	DDX24_HUMAN	ATP-dependent RNA helicase DDX24	-0.0633185	-0.908317	0.43145	0.540468
DNAI2	Q9GZS0	Q9GZS0	DNAI2_HUMAN	Dynein axonemal intermediate chain 2	2.22133	9.66825	10.4268	0
HOXD1	Q9GZZ0	Q9GZZ0	HXD1_HUMAN	Homeobox protein Hox-D1	0.102446	0.494353	0.204585	0.772302
NAA50	Q9GZZ1	Q9GZZ1	NAA50_HUMAN	N-alpha-acetyltransferase 50	0.00854244	0.145313	0.0528861	0.936788
DRC3	Q9H069	Q9H069	DRC3_HUMAN	Dynein regulatory complex subunit 3	1.84259	3.98637	3.45627	0.000954839
CRISPLD2	Q9H0B8	Q9H0B8	CRLD2_HUMAN	Cysteine-rich secretory protein LCCL domain-containing 2	0	NaN	NaN	1
RACGAP1	Q9H0H5	Q9H0H5	RGAP1_HUMAN	Rac GTPase-activating protein 1	0.149884	0.370232	0.14656	0.834632
CYSTM1	Q9H1C7	Q9H1C7	CYTM1_HUMAN	Cysteine-rich and transmembrane domain-containing protein 1	0.627176	6.01958	6.04062	0
RSPH9	Q9H1X1	Q9H1X1	RSPH9_HUMAN	Radial spoke head protein 9 homolog	2.29503	10.2181	11.0266	0
SH3BGRL3	Q9H299	Q9H299	SH3L3_HUMAN	SH3 domain-binding glutamic acid-rich-like protein 3	-0.196857	-1.57485	0.903679	0.230093
TSPYL2	Q9H2G4	Q9H2G4	TSYL2_HUMAN	Testis-specific Y-encoded-like protein 2	0	NaN	NaN	1
SLC38A1	Q9H2H9	Q9H2H9	S38A1_HUMAN	Sodium-coupled neutral amino acid symporter 1	-0.290057	-1.56573	0.896363	0.233515
TTYH1	Q9H313	Q9H313	TTYH1_HUMAN	Protein tweety homolog 1	0.678603	2.96344	2.25112	0.0149254
TXNIP	Q9H3M7	Q9H3M7	TXNIP_HUMAN	Thioredoxin-interacting protein	0.132685	0.453396	0.184933	0.797027
CENPH	Q9H3R5	Q9H3R5	CENPH_HUMAN	Centromere protein H	-0.0672903	-0.38598	0.15367	0.829347
SMOC2	Q9H3U7	Q9H3U7	SMOC2_HUMAN	SPARC-related modular calcium-binding protein 2	-0.221638	-0.792901	0.363012	0.616878
RGCC	Q9H4X1	Q9H4X1	RGCC_HUMAN	Regulator of cell cycle RGCC	0.154899	0.740845	0.333457	0.646007
SOX17	Q9H6I2	Q9H6I2	SOX17_HUMAN	Transcription factor SOX-17	-0.190308	-1.44639	0.802722	0.277447
IFT22	Q9H7X7	Q9H7X7	IFT22_HUMAN	Intraflagellar transport protein 22 homolog	1.14375	13.3479	14.1268	0
TUBA4B	Q9H853	Q9H853	TBA4B_HUMAN	Putative tubulin-like protein alpha-4B	-0.0529862	-0.10014	0.0358161	0.957602
ECT2	Q9H8V3	Q9H8V3	ECT2_HUMAN	Protein ECT2	-0.721083	-2.36597	1.61962	0.0554466
WDR54	Q9H977	Q9H977	WDR54_HUMAN	WD repeat-containing protein 54	1.6452	8.82813	9.47726	0
VPS37B	Q9H9H4	Q9H9H4	VP37B_HUMAN	Vacuolar protein sorting-associated protein 37B	0.0584893	0.661999	0.290248	0.685358
KIF9	Q9HAQ2	Q9HAQ2	KIF9_HUMAN	Kinesin-like protein KIF9	0.634533	3.64693	3.04317	0.0022994
SPC25	Q9HBM1	Q9HBM1	SPC25_HUMAN	Kinetochore protein Spc25	-0.502136	-2.12695	1.38734	0.088731
EML4	Q9HC35	Q9HC35	EMAL4_HUMAN	Echinoderm microtubule-associated protein-like 4	-0.611306	-5.8914	5.87678	0
ZBTB20	Q9HC78	Q9HC78	ZBT20_HUMAN	Zinc finger and BTB domain-containing protein 20	-0.489646	-2.70352	1.96822	0.0261607
DYNLRB1	Q9NP97	Q9NP97;Q8TF09	DLRB1_HUMAN	Dynein light chain roadblock-type 1	0.629264	6.44077	6.57642	0
UBE2T	Q9NPD8	Q9NPD8	UBE2T_HUMAN	Ubiquitin-conjugating enzyme E2 T	0.187817	0.820616	0.37908	0.598759
ISYNA1	Q9NPH2	Q9NPH2	INO1_HUMAN	Inositol-3-phosphate synthase 1	0.06509	0.317258	0.123178	0.860136
CRTAC1	Q9NQ79	Q9NQ79	CRAC1_HUMAN	Cartilage acidic protein 1	0.436081	1.11086	0.561207	0.419657
IFT46	Q9NQC8	Q9NQC8	IFT46_HUMAN	Intraflagellar transport protein 46 homolog	1.44738	12.3011	13.1468	0
NPDC1	Q9NQX5	Q9NQX5	NPDC1_HUMAN	Neural proliferation differentiation and control protein 1	0.384692	1.97	1.24201	0.119936
DDX21	Q9NR30	Q9NR30	DDX21_HUMAN	Nucleolar RNA helicase 2	-0.243876	-2.28689	1.54136	0.0658779
CHST12	Q9NRB3	Q9NRB3	CHSTC_HUMAN	Carbohydrate sulfotransferase 12	0.209825	1.02536	0.504941	0.470882
OLFML3	Q9NRN5	Q9NRN5	OLFL3_HUMAN	Olfactomedin-like protein 3	-0.215967	-0.826199	0.382345	0.594967
CMC2	Q9NRP2	Q9NRP2	COXM2_HUMAN	COX assembly mitochondrial protein 2 homolog	0.122397	0.657713	0.287953	0.68806
SMC4	Q9NTJ3	Q9NTJ3	SMC4_HUMAN	Structural maintenance of chromosomes protein 4	-0.117872	-0.3577	0.140954	0.838326
FANCI	Q9NVI1	Q9NVI1	FANCI_HUMAN	Fanconi anemia group I protein	-0.190521	-0.606266	0.260834	0.714362
ASF1B	Q9NVP2	Q9NVP2	ASF1B_HUMAN	Histone chaperone ASF1B	-0.625549	-2.48622	1.74119	0.0417561
LYAR	Q9NX58	Q9NX58	LYAR_HUMAN	Cell growth-regulating nucleolar protein	-0.477658	-4.13998	3.64637	0.000734694
P4HTM	Q9NXG6	Q9NXG6	P4HTM_HUMAN	Transmembrane prolyl 4-hydroxylase	0.472653	3.86262	3.30446	0.00140881
CLDND1	Q9NY35	Q9NY35	CLDN1_HUMAN	Claudin domain-containing protein 1	-0.231345	-1.43987	0.797717	0.279778
OBP2A	Q9NY56	Q9NY56	OBP2A_HUMAN	Odorant-binding protein 2a	-0.0959279	-0.510068	0.212257	0.765838
GTSE1	Q9NYZ3	Q9NYZ3	GTSE1_HUMAN	G2 and S phase-expressed protein 1	-0.3465	-1.81374	1.10336	0.157887
NOP53	Q9NZM5	Q9NZM5	NOP53_HUMAN	Ribosome biogenesis protein NOP53	-0.0416441	-0.560448	0.237352	0.737962
LMCD1	Q9NZU5	Q9NZU5	LMCD1_HUMAN	LIM and cysteine-rich domains protein 1	-0.135643	-1.2596	0.66424	0.352816
CHMP5	Q9NZZ3	Q9NZZ3	CHMP5_HUMAN	Charged multivesicular body protein 5	0.289296	4.34915	3.90778	0.000558824
SLAIN2	Q9P270	Q9P270	SLAI2_HUMAN	SLAIN motif-containing protein 2	0.204435	2.82914	2.10348	0.0205742
USP36	Q9P275	Q9P275	UBP36_HUMAN	Ubiquitin carboxyl-terminal hydrolase 36	-0.0693271	-0.5794	0.246989	0.728373
SAE1	Q9UBE0	Q9UBE0	SAE1_HUMAN	SUMO-activating enzyme subunit 1	-0.225381	-4.25877	3.7945	0.000666667
BIN2	Q9UBW5	Q9UBW5	BIN2_HUMAN	Bridging integrator 2	-0.0329903	-0.225275	0.0845187	0.899717
SUN2	Q9UH99	Q9UH99	SUN2_HUMAN	SUN domain-containing protein 2	-0.315783	-1.9395	1.21447	0.126527
ADAMTS1	Q9UHI8	Q9UHI8	ATS1_HUMAN	A disintegrin and metalloproteinase with thrombospondin motifs 1	0.255287	0.676729	0.298178	0.675096
CEMIP2	Q9UHN6	Q9UHN6	CEIP2_HUMAN	Cell surface hyaluronidase	0.42712	3.51807	2.88934	0.00326437
EVL	Q9UI08	Q9UI08	EVL_HUMAN	Ena/VASP-like protein	-0.132895	-1.32031	0.708149	0.327236
DNAI1	Q9UI46	Q9UI46	DNAI1_HUMAN	Dynein axonemal intermediate chain 1	1.88991	11.7428	12.6014	0
TEKT2	Q9UIF3	Q9UIF3	TEKT2_HUMAN	Tektin-2	2.16447	9.15325	9.84949	0
ATP5IF1	Q9UII2	Q9UII2	ATIF1_HUMAN	ATPase inhibitor, mitochondrial	0.585394	2.57065	1.82831	0.0344198
MOSPD1	Q9UJG1	Q9UJG1	MSPD1_HUMAN	Motile sperm domain-containing protein 1	1.23792	3.66444	3.06423	0.00218182
METRN	Q9UJH8	Q9UJH8	METRN_HUMAN	Meteorin	0.687679	1.39384	0.762752	0.298802
ANAPC4	Q9UJX5	Q9UJX5	APC4_HUMAN	Anaphase-promoting complex subunit 4	0.395705	5.02747	4.76923	9.91736e-05
HSPB8	Q9UJY1	Q9UJY1	HSPB8_HUMAN	Heat shock protein beta-8	0.380314	2.13334	1.39338	0.0878194
JPT1	Q9UK76	Q9UK76	JUPI1_HUMAN	Jupiter microtubule associated homolog 1	0.259984	2.08557	1.34845	0.0961486
RALY	Q9UKM9	Q9UKM9	RALY_HUMAN	RNA-binding protein Raly	-0.120778	-1.41003	0.77498	0.290938
INTS6	Q9UL03	Q9UL03	INT6_HUMAN	Integrator complex subunit 6	-0.229914	-2.99301	2.28402	0.01378
CFAP45	Q9UL16	Q9UL16	CFA45_HUMAN	Cilia- and flagella-associated protein 45	1.86186	10.2952	11.1094	0
PSME2	Q9UL46	Q9UL46	PSME2_HUMAN	Proteasome activator complex subunit 2	-0.213464	-2.26703	1.52192	0.0677753
TPX2	Q9ULW0	Q9ULW0	TPX2_HUMAN	Targeting protein for Xklp2	-0.307524	-0.726014	0.325186	0.65287
MAFF	Q9ULX9	O60675;O15525;Q9ULX9	MAFF_HUMAN	Transcription factor MafF	-0.0815633	-0.646668	0.282064	0.695579
SYNPO2	Q9UMS6	Q9UMS6	SYNP2_HUMAN	Synaptopodin-2	-0.738284	-2.77919	2.04936	0.0228148
NDRG2	Q9UN36	Q9UN36	NDRG2_HUMAN	Protein NDRG2	-0.162403	-0.909553	0.432205	0.540484
ARHGAP26	Q9UNA1	Q9UNA1	RHG26_HUMAN	Rho GTPase-activating protein 26	0.570175	4.75801	4.42517	0.00021875
MAGED2	Q9UNF1	Q9UNF1	MAGD2_HUMAN	Melanoma-associated antigen D2	-0.338896	-2.26711	1.522	0.068015
SSR3	Q9UNL2	Q9UNL2	SSRG_HUMAN	Translocon-associated protein subunit gamma	0.0745342	0.502297	0.208454	0.768955
B9D1	Q9UPM9	Q9UPM9	B9D1_HUMAN	B9 domain-containing protein 1	1.38685	12.4579	13.297	0
PA2G4	Q9UQ80	Q9UQ80	PA2G4_HUMAN	Proliferation-associated protein 2G4	-0.197753	-2.66213	1.92427	0.0281709
RUVBL2	Q9Y230	Q9Y230	RUVB2_HUMAN	RuvB-like 2	0.582383	7.57394	7.9873	0
DLEC1	Q9Y238	Q9Y238	DLEC1_HUMAN	Deleted in lung and esophageal cancer protein 1	1.77428	7.45273	7.83903	0
EIF3L	Q9Y262	Q9Y262	EIF3L_HUMAN	Eukaryotic translation initiation factor 3 subunit L	-0.0238886	-0.607151	0.261294	0.714817
NUDC	Q9Y266	Q9Y266	NUDC_HUMAN	Nuclear migration protein nudC	0.822364	10.5526	11.3831	0
AMOTL2	Q9Y2J4	Q9Y2J4	AMOL2_HUMAN	Angiomotin-like protein 2	-0.44495	-1.69943	1.00592	0.189252
CARHSP1	Q9Y2V2	Q9Y2V2	CHSP1_HUMAN	Calcium-regulated heat-stable protein 1	0.188987	1.19319	0.617439	0.380116
EMC9	Q9Y3B6	Q9Y3B6	EMC9_HUMAN	ER membrane protein complex subunit 9	0.290532	1.34449	0.725932	0.31827
TPRKB	Q9Y3C4	Q9Y3C4	TPRKB_HUMAN	EKC/KEOPS complex subunit TPRKB	-0.0847082	-0.492079	0.20348	0.773227
UFC1	Q9Y3C8	Q9Y3C8	UFC1_HUMAN	Ubiquitin-fold modifier-conjugating enzyme 1	0.631548	6.28184	6.37478	0
RPL36	Q9Y3U8	Q9Y3U8	RL36_HUMAN	Large ribosomal subunit protein eL36	-0.235402	-2.31494	1.56897	0.0624031
SAMHD1	Q9Y3Z3	Q9Y3Z3	SAMH1_HUMAN	Deoxynucleoside triphosphate triphosphohydrolase SAMHD1	1.53018	8.54282	9.14575	0
SPEF1	Q9Y4P9	Q9Y4P9	SPEF1_HUMAN	Sperm flagellar protein 1	2.12644	9.39022	10.117	0
LSM4	Q9Y4Z0	Q9Y4Z0	LSM4_HUMAN	U6 snRNA-associated Sm-like protein LSm4	-0.146332	-1.93012	1.20604	0.128264
TACC3	Q9Y6A5	Q9Y6A5	TACC3_HUMAN	Transforming acidic coiled-coil-containing protein 3	-0.494433	-1.63207	0.950112	0.209266
IVNS1ABP	Q9Y6Y0	Q9Y6Y0	NS1BP_HUMAN	Influenza virus NS1A-binding protein	0.466295	2.04769	1.31321	0.101954
