# Supplementary material for: Spatial proteomics of ovarian cancer precursors delineates early disease changes and drug targets
Source: Mol Syst Biol. 2025 Nov 13;22(1):7–41. doi: 10.1038/s44320-025-00168-4 (PMC12759074; doi:10.1038/s44320-025-00168-4)
Supplement: Supplementary file 13 — Dataset EV7 [file 44320_2025_168_MOESM13_ESM.xlsx]

## Sheet: Legend
Dataset EV 7. ANOVA-significant proteins between STICs, secretory, and ciliated fallopian tube epithelial cells from 6 patients. Relative protein levels (z-scores) and cluster information are shown. Related to figure 3J.

## Sheet: Dataset EV7
Genes	Cluster ID	FT10822_PAX8neg_S1-E3_1_8019.d	FT13959_PAX8neg_S1-C7_1_8015.d	FT56137_PAX8neg_S1-C3_1_8011.d	FT6501_PAX8neg_S1-E7_1_8023.d	FT62547_PAX8neg_S1-A3_1_8003.d	FT64093_PAX8neg_S1-A7_1_8007.d	FT64093_PAX8pos_S1-A8_1_8008.d	FT62547_PAX8pos_S1-A4_1_8004.d	FT10822_PAX8pos_S1-E4_1_8020.d	FT13959_PAX8pos_S1-C8_1_8016.d	FT6501_PAX8pos_S1-E8_1_8024.d	FT56137_PAX8pos_S1-C4_1_8012.d	FT64093_STIC_S1-A9_1_8009.d	FT62547_STIC_S1-A5_1_8005.d	FT10822_STIC_S1-E5_1_8021.d	FT13959_STIC_S1-C9_1_8017.d	FT6501_STIC_S1-E9_1_8025.d	FT56137_STIC_S1-C5_1_8013.d	Cluster	Student's T-test Significant STIC_Epithelium PAX8 pos	Student's T-test significant	Hallmark	Reactome pathway	WikiPathway	matrix21	Disease involvement	Chromosome	ANOVA Significant	-Log Student's T-test p-value STIC_Epithelium PAX8 pos	Student's T-test q-value STIC_Epithelium PAX8 pos	Student's T-test Difference STIC_Epithelium PAX8 pos	Student's T-test Test statistic STIC_Epithelium PAX8 pos	-Log ANOVA p value	ANOVA q-value	Protein.Group	Protein.Ids	Protein.Names	First.Protein.Description	Cluster(ID)	QuickSelect	IC Cluster Index	IC Data Index
RSRC1	C1	-0.228286	-1.73474	-0.796839	-0.0794861	0.585587	-0.761973	-1.20515	0.0974088	0.475417	-1.40265	-0.358407	-0.191419	-0.140813	1.38511	0.770484	1.3236	0.206209	2.05595	-	+	STIC_Epithelium PAX8 pos	-	-	-	-	-	-	+	1.90606	0.0252372	0.34972	3.04225	2.02019	0.0117914	Q96IZ7	Q96IZ7	RSRC1_HUMAN	Serine/Arginine-related protein 53	C (7)		2630	3382
INTS8	C1	-0.528125	-2.02963	-1.58852	-0.191441	0.299361	-0.594651	-0.382415	0.190703	0.38305	-0.728718	0.406875	0.25927	-0.401694	0.942769	0.872298	2.19894	-0.40876	1.30069	-	-	-	-	RNA polymerase II transcribes snRNA genes	-	-	-	-	+	0.853328	0.212082	0.342117	1.60228	1.71588	0.00789568	Q75QN2	Q75QN2	INT8_HUMAN	Integrator complex subunit 8	C (7)		2631	2575
UBXN7	C1	-0.548106	-1.79813	-1.48107	0.195026	0.467803	-1.14331	-0.2231	0.0144034	0.494284	0.281564	-0.273042	-0.487977	-0.573407	0.231622	0.72965	1.17623	0.371164	2.56639	-	-	-	-	Neddylation	WP_3Q29_COPY_NUMBER_VARIATION_SYNDROME	-	-	-	+	0.923975	0.182821	0.163069	1.70437	1.56219	0.0388615	O94888	O94888	UBXN7_HUMAN	UBX domain-containing protein 7	C (7)		2632	501
EED	C1	0.179747	-1.71338	-1.44081	0.0838956	1.27847	-0.896581	-0.589657	-0.408232	0.489912	-0.794414	-0.473458	-0.374943	-0.268124	-0.206509	0.754374	1.95169	0.813919	1.6141	-	+	STIC_Epithelium PAX8 pos	HALLMARK_E2F_TARGETS	Activation of anterior HOX genes in hindbrain development during early embryogenesis;Oxidative Stress Induced Senescence;PKMTs methylate histone lysines;PRC2 methylates histones and DNA;Regulation of PTEN gene transcription;Transcriptional Regulation by E2F6	WP_EPITHELIAL_TO_MESENCHYMAL_TRANSITION_IN_COLORECTAL_CANCER;WP_FBXL10_ENHANCEMENT_OF_MAPERK_SIGNALING_IN_DIFFUSE_LARGE_BCELL_LYMPHOMA;WP_HISTONE_MODIFICATIONS;WP_INTERACTOME_OF_POLYCOMB_REPRESSIVE_COMPLEX_2_PRC2;WP_MALIGNANT_PLEURAL_MESOTHELIOMA;WP_TUMOR_SUPPRESSOR_ACTIVITY_OF_SMARCB1	-	-	-	+	1.68658	0.0391031	0.513601	2.74715	1.2557	0.0236182	O75530	O75530	EED_HUMAN	Polycomb protein EED	C (7)		2633	429
LRRC42	C1	0.60794	-1.06982	-1.44592	1.12368	0.0144738	-1.32389	-0.539916	-0.00805048	0.0332448	-1.1381	0.353673	-1.23235	-0.692772	0.649619	1.02464	1.9286	0.912813	0.802127	-	+	STIC_Epithelium PAX8 pos	-	-	-	-	-	-	+	1.67028	0.0401593	0.756756	2.72528	1.23476	0.0179568	Q9Y546	Q9Y546	LRC42_HUMAN	Leucine-rich repeat-containing protein 42	C (7)		2634	4589
MTA3	C1	0.286214	-1.11098	-0.912676	-0.423312	0.000354453	-2.1471	0.186729	0.353883	-1.84273	-0.242161	0.0669852	-0.197989	0.963041	0.747966	1.09821	1.49429	0.655721	1.02356	-	+	STIC_Epithelium PAX8 pos	-	ERCC6 (CSB) and EHMT2 (G9a) positively regulate rRNA expression;HDACs deacetylate histones;Regulation of PTEN gene transcription;RNA Polymerase I Transcription Initiation	WP_EFFECT_OF_PROGERIN_ON_GENES_INVOLVED_IN_HUTCHINSONGILFORD_PROGERIA_SYNDROME;WP_PREIMPLANTATION_EMBRYO	-	-	-	+	2.3649	0.0107834	1.04892	3.67014	2.67664	0.000476915	Q9BTC8	Q9BTC8	MTA3_HUMAN	Metastasis-associated protein MTA3	C (7)		2635	3641
KIN	C1	0.82691	-1.61216	-0.462969	-0.168016	0.00858087	-1.18386	0.227759	0.206648	-1.89746	-1.17858	0.204192	0.145797	0.323594	0.538689	0.260556	1.78583	0.173383	1.80111	-	-	-	-	Protein methylation	-	-	-	-	+	1.45554	0.0609703	0.96238	2.43695	1.4087	0.00938965	O60870	O60870	KIN17_HUMAN	DNA/RNA-binding protein KIN17	C (7)		2636	372
PTPN12	C1	0.435216	-2.01589	-1.2783	-0.204989	-0.0548983	-1.22298	0.135415	-0.202947	-0.489308	-0.719235	-0.239518	-0.0726546	1.43917	0.273394	0.876788	2.23876	0.268856	0.833117	-	+	STIC_Epithelium PAX8 pos	-	Downregulation of ERBB2 signaling;EGFR downregulation;Interleukin-37 signaling;SHC1 events in ERBB2 signaling;Signaling by PDGF	WP_EGFEGFR_SIGNALING_PATHWAY	-	-	-	+	2.44595	0.00959387	0.469355	3.78349	2.63228	0.00191603	Q05209	Q05209	PTN12_HUMAN	Tyrosine-protein phosphatase non-receptor type 12	C (7)		2637	1747
NCOA5	C1	0.0376506	-1.10363	-1.84222	-0.108352	0.209352	-0.614344	-0.867274	-0.178553	0.257351	-0.914348	-0.419934	-0.00361758	0.483403	-0.434317	2.15865	1.68265	0.194693	1.46284	-	+	STIC_Epithelium PAX8 pos	-	-	-	-	-	-	+	1.7583	0.0338164	0.334919	2.84341	2.01224	0.011437	Q9HCD5	Q9HCD5	NCOA5_HUMAN	Nuclear receptor coactivator 5	C (7)		2638	3972
SUPT5H	C1	-0.21265	-1.12166	-0.887367	-0.406288	-0.276487	-0.601107	-0.339648	-0.116227	-0.0578541	-0.75186	-0.288768	-0.260011	0.241651	-0.959967	2.45339	1.12746	0.18747	2.26992	-	-	-	HALLMARK_DNA_REPAIR	Abortive elongation of HIV-1 transcript in the absence of Tat;Formation of HIV elongation complex in the absence of HIV Tat;Formation of HIV-1 elongation complex containing HIV-1 Tat;Formation of RNA Pol II elongation complex;Formation of the Early Elongation Complex;Formation of the HIV-1 Early Elongation Complex;HIV elongation arrest and recovery;mRNA Capping;Pausing and recovery of HIV elongat…	WP_INITIATION_OF_TRANSCRIPTION_AND_TRANSLATION_ELONGATION_AT_THE_HIV1_LTR;WP_MRNA_PROCESSING	-	-	-	+	1.25536	0.0925629	0.388172	2.16599	1.8322	0.0106095	O00267	O00267	SPT5H_HUMAN	Transcription elongation factor SPT5	C (7)		2639	117
MED25	C1	-0.314908	-1.17678	-1.66073	-0.44259	-0.177017	-1.18911	-0.513901	0.398524	0.486209	-0.499817	-0.554759	-0.108455	0.0329921	-0.317762	1.39567	1.55207	0.973326	2.11705	-	-	-	-	Generic Transcription Pathway;PPARA activates gene expression;Transcriptional regulation of white adipocyte differentiation	-	-	-	-	+	1.53884	0.0513877	0.367493	2.54892	2.76398	0.00191762	Q71SY5	Q86YD1;Q71SY5	MED25_HUMAN	Mediator of RNA polymerase II transcription subunit 25	C (7)		2640	2573
MAGOH;MAGOHB	C1	0.0853934	-0.963844	-1.42479	-0.996418	0.0434837	-0.816682	-0.824786	0.331049	-0.274805	-0.787878	-0.405795	0.0204526	-0.252627	0.208853	1.25479	1.83398	0.689202	2.28043	-	+	STIC_Epithelium PAX8 pos	-	Cleavage of Growing Transcript in the Termination Region;mRNA 3'-end processing;mRNA Splicing - Major Pathway;Nonsense Mediated Decay (NMD) enhanced by the Exon Junction Complex (EJC);Regulation of expression of SLITs and ROBOs;Transport of Mature mRNA derived from an Intron-Containing Transcript	-	-	-	-	+	1.9032	0.0253879	0.390135	3.03839	2.63187	0.00320165	P61326;Q96A72	Q96A72;P61326	MGN2_HUMAN;MGN_HUMAN	Protein mago nashi homolog	C (7)		2641	1533
BAZ1B	C1	-0.181188	-0.789471	-1.49282	-0.268676	-0.764621	-0.963932	-0.172106	-0.462841	-0.242353	-0.581973	-0.183481	-0.160814	-0.21165	-0.0382137	1.28032	2.04791	0.931816	2.25408	-	+	STIC_Epithelium PAX8 pos	-	B-WICH complex positively regulates rRNA expression;Recruitment and ATM-mediated phosphorylation of repair and signaling proteins at DNA double strand breaks	WP_7Q1123_COPY_NUMBER_VARIATION_SYNDROME;WP_IL18_SIGNALING_PATHWAY	-	-	-	+	1.98993	0.0213623	0.524557	3.15562	3.08112	0.000766151	Q9UIG0	Q9UIG0	BAZ1B_HUMAN	Tyrosine-protein kinase BAZ1B	C (7)		2642	4341
AHCTF1	C1	-0.216277	-1.12804	-1.33979	-0.446265	-0.407909	-0.772557	-0.319631	-0.104082	-0.197332	-0.549797	-0.167159	-0.0338374	-0.346285	-0.521459	1.4074	1.83141	0.871604	2.44001	-	-	-	-	Amplification of signal from unattached kinetochores via a MAD2 inhibitory signal;Mitotic Prometaphase;Resolution of Sister Chromatid Cohesion;RHO GTPases Activate Formins;Separation of Sister Chromatids	WP_GASTRIC_CANCER_NETWORK_2	-	-	-	+	1.42471	0.0646056	0.207737	2.39542	2.37199	0.016109	Q8WYP5	Q8WYP5	ELYS_HUMAN	Protein ELYS	C (7)		2643	3127
PRRC2C	C1	-0.695961	-0.913322	-1.22173	-0.638403	0.125914	-0.449213	-0.733104	-0.199515	-0.783637	-0.512112	-0.516122	-0.469545	0.400855	0.215387	1.9393	1.95903	0.649441	1.84274	-	+	STIC_Epithelium PAX8 pos	-	-	WP_VEGFAVEGFR2_SIGNALING	-	-	-	+	3.19074	0.00276023	0.355238	4.87729	4.1887	0.00103401	Q9Y520	Q9Y520	PRC2C_HUMAN	Protein PRRC2C	C (7)		2644	4587
IWS1	C1	-0.0933348	-0.571786	-1.40469	-0.680471	-0.427084	-0.140698	-0.94701	-0.306824	-0.322709	-0.341779	-0.810107	-0.82772	0.15656	0.400045	1.94313	1.69605	0.615073	2.06335	-	+	STIC_Epithelium PAX8 pos	-	Formation of RNA Pol II elongation complex;RNA Polymerase II Pre-transcription Events;RNA Polymerase II Transcription Elongation	-	-	-	-	+	3.09841	0.00308397	0.691733	4.73572	3.8699	0.000220433	Q96ST2	Q96ST2	IWS1_HUMAN	Protein IWS1 homolog	C (7)		2645	3507
NVL	C1	0.121243	-1.47209	-0.642292	-0.721175	0.458278	-0.600323	-0.924788	0.300186	-0.404605	-0.902365	-1.25396	-0.145764	0.541189	0.233057	1.58588	1.0916	0.367514	2.36841	-	+	STIC_Epithelium PAX8 pos	-	-	-	-	-	-	+	2.4958	0.00887701	0.778934	3.85368	2.70497	0.000944444	O15381	O15381	NVL_HUMAN	Nuclear valosin-containing protein-like	C (7)		2646	239
DBR1	C1	-0.380501	-0.997776	-1.15145	-0.924125	-1.23715	-1.02197	0.14048	-0.395369	0.292897	0.0417595	0.0238288	0.0964983	0.242393	-0.247511	1.38538	0.676464	0.64133	2.81482	-	-	-	-	-	-	-	-	-	+	1.11598	0.123627	0.291705	1.97455	3.13735	0.00103942	Q9UK59	Q9UK59	DBR1_HUMAN	Lariat debranching enzyme	C (7)		2647	4362
CDC73	C1	-0.802964	-0.88632	-1.22598	-0.140531	-0.341486	-1.07386	-0.413006	-0.226828	0.0632059	-0.264719	-0.197935	0.0122421	-0.302114	-0.128378	1.15221	1.08449	0.618206	3.07377	-	-	-	-	E3 ubiquitin ligases ubiquitinate target proteins;Formation of RNA Pol II elongation complex;Formation of the beta-catenin:TCF transactivating complex;Hedgehog 'on' state;RNA Polymerase II Pre-transcription Events;RNA Polymerase II Transcription Elongation	WP_ENDODERM_DIFFERENTIATION	-	-	-	+	1.25536	0.0926036	0.334018	2.166	2.2754	0.00535667	Q6P1J9	Q6P1J9	CDC73_HUMAN	Parafibromin	C (7)		2648	2464
BUD31	C1	0.0376176	-1.68089	-0.642819	0.229056	-0.97864	-0.640263	-0.312271	-0.167757	0.16748	-0.457011	-0.911382	0.596761	-0.0685794	-0.836745	1.12279	1.08809	0.812386	2.64218	-	-	-	-	mRNA Splicing - Major Pathway	-	-	-	-	+	1.02265	0.149011	0.283479	1.84436	1.48507	0.0253796	P41223	P41223	BUD31_HUMAN	Protein BUD31 homolog	C (7)		2649	1220
CHTF18	C1	0.438408	-2.03151	-0.245453	0.46241	-1.22772	-1.70369	1.31774	0.6937	-0.667537	-0.480036	-0.182126	-1.0375	0.588379	0.62074	0.490721	1.18029	1.02994	0.753242	-	-	-	-	-	WP_7Q1123_COPY_NUMBER_VARIATION_SYNDROME;WP_GASTRIC_CANCER_NETWORK_2	-	-	-	+	1.27772	0.0881074	0.772128	2.19645	1.64413	0.0046549	Q8WVB6	Q8WVB6	CTF18_HUMAN	Chromosome transmission fidelity protein 18 homolog	C (7)		2650	3084
ARMCX2	C1	0.296025	-1.41189	-0.706638	0.899936	-1.98761	-1.76552	0.6597	0.249763	0.423922	-0.391611	-0.695475	0.535314	1.41012	-0.152302	1.32488	-0.193776	0.796912	0.708242	-	-	-	-	-	-	-	-	-	+	0.741271	0.264428	0.399912	1.43636	1.49972	0.00772342	Q7L311	Q7L311	ARMX2_HUMAN	Armadillo repeat-containing X-linked protein 2	C (7)		2651	2589
OVCA2	C1	-0.30069	-2.26157	-1.17458	-0.100193	-0.126983	-2.30855	0.567604	0.720812	0.413074	0.401725	0.310328	0.0499666	0.451242	0.0871512	0.97545	1.2386	0.012518	1.04409	-	-	-	-	-	-	-	-	-	+	0.445266	0.466579	0.213117	0.962067	2.88415	0.000252955	Q8WZ82	Q8WZ82	OVCA2_HUMAN	Esterase OVCA2	C (7)		2652	3131
TRIM24	C1	-0.24746	-2.50724	-0.562161	-0.0324315	-0.181429	-2.34861	0.609241	0.0974053	0.191948	0.0706473	0.123493	0.0614684	0.684974	0.712555	0.272122	1.16851	0.67118	1.21579	-	+	STIC_Epithelium PAX8 pos	-	Signaling by BRAF and RAF fusions;Signaling by cytosolic FGFR1 fusion mutants;Signaling by FGFR1 in disease	-	-	-	-	+	2.27806	0.0126311	0.380475	3.54962	2.75535	0.000559413	O15164	O15164	TIF1A_HUMAN	Transcription intermediary factor 1-alpha	C (7)		2653	218
BRD8	C1	-0.385488	-3.1288	-1.32155	-0.0725674	0.184274	-1.16253	0.15337	-0.00231607	0.597271	0.227365	0.42843	0.403406	0.857585	0.242492	0.985987	0.740668	0.472418	0.779986	-	+	STIC_Epithelium PAX8 pos	-	HATs acetylate histones	-	-	-	-	+	1.62273	0.0441405	0.153452	2.66149	2.49337	0.00208495	Q9H0E9	Q9H0E9	BRD8_HUMAN	Bromodomain-containing protein 8	C (7)		2654	3793
NSUN5	C1	0.0178691	-1.6872	-2.58108	0.717408	-0.0359799	-1.73826	0.50422	0.197418	0.516007	0.249889	0.106157	0.464708	0.324893	0.450394	0.032519	0.463964	0.45744	1.53963	-	-	-	-	-	-	-	-	-	+	0.42294	0.485436	0.128771	0.923232	1.7835	0.00479668	Q96P11	Q96P11	NSUN5_HUMAN	28S rRNA (cytosine-C(5))-methyltransferase	C (7)		2655	3450
ZNF622	C1	0.555826	-2.26323	-1.91561	0.69918	0.123991	-2.20473	0.265925	0.423104	0.408931	0.572585	0.579094	0.446152	0.494313	0.45629	0.453535	-0.0916865	0.283617	0.712708	-	-	-	-	-	-	-	-	-	+	0.219144	0.704385	-0.0624388	-0.535891	1.50005	0.00643342	Q969S3	Q969S3	ZN622_HUMAN	Cytoplasmic 60S subunit biogenesis factor ZNF622	C (7)		2656	3217
SNRNP27	C1	-0.149542	-1.18747	-2.31702	-0.817477	-0.245359	-1.33881	-0.259516	0.317434	1.13822	0.183828	0.751602	-0.0034451	-0.63251	0.812471	1.6625	0.343649	0.590312	1.15112	-	-	-	-	mRNA Splicing - Major Pathway	-	-	-	-	+	0.347441	0.55963	0.0508308	0.787371	2.63843	0.0127167	Q8WVK2	Q8WVK2	SNR27_HUMAN	U4/U6.U5 small nuclear ribonucleoprotein 27 kDa protein	C (7)		2657	3089
SYF2	C1	-0.0641606	-1.31634	-1.97418	-0.461625	-0.0500554	-1.42229	-0.836769	-0.211393	1.02969	0.558971	1.06217	0.518725	-0.486092	0.249581	1.01568	-0.288015	0.78195	1.89415	-	-	-	-	mRNA Splicing - Major Pathway	-	-	-	-	+	0.142646	0.801595	0.0693216	0.368703	1.75571	0.00911067	O95926	O95926	SYF2_HUMAN	Pre-mRNA-splicing factor SYF2	C (7)		2658	592
SF3A1	C1	-0.104369	-1.10177	-2.24184	-0.777988	-0.251979	-1.18868	-0.750331	0.600974	0.686803	0.244538	0.413185	0.41008	-0.848509	1.25623	0.670114	0.816815	0.337896	1.82883	-	-	-	HALLMARK_MYC_TARGETS_V1	mRNA Splicing - Major Pathway	WP_MRNA_PROCESSING	-	-	-	+	0.442334	0.46853	0.0910425	0.956998	2.26938	0.0107513	Q15459	Q15459	SF3A1_HUMAN	Splicing factor 3A subunit 1	C (7)		2659	2076
SF3A3	C1	-0.0362611	-1.21912	-2.07804	-0.757013	-0.614004	-0.912749	-0.660649	0.134599	1.00201	0.508788	0.157561	0.519263	-0.995068	0.911557	0.782859	0.558344	0.636932	2.06099	-	-	-	HALLMARK_DNA_REPAIR	mRNA Splicing - Major Pathway	WP_EXERCISEINDUCED_CIRCADIAN_REGULATION;WP_MRNA_PROCESSING	-	-	-	+	0.371508	0.53596	0.0941962	0.8315	2.192	0.00969731	Q12874	Q12874	SF3A3_HUMAN	Splicing factor 3A subunit 3	C (7)		2660	1827
SF3B2	C1	-0.28585	-1.29042	-1.58315	-0.475236	0.0871516	-1.27891	-1.25955	0.4476	0.808362	0.0129543	0.290541	0.160479	-0.873548	1.48109	0.760102	0.316706	0.600338	2.08133	-	-	-	-	mRNA Splicing - Major Pathway;mRNA Splicing - Minor Pathway	WP_MRNA_PROCESSING	-	-	-	+	0.644296	0.32133	0.158347	1.28776	1.75936	0.0206407	Q13435	Q13435	SF3B2_HUMAN	Splicing factor 3B subunit 2	C (7)		2661	1880
RBM42	C1	0.670916	-1.25021	-2.08403	-0.497285	-0.747688	-0.559712	-0.821722	0.123509	0.864407	-0.478267	-0.0287569	0.209048	-0.695123	0.882632	0.526071	0.842004	0.839612	2.20459	-	-	-	-	-	-	-	-	-	+	0.96585	0.167339	0.210377	1.76411	1.68193	0.0201028	Q9BTD8	Q9BTD8	RBM42_HUMAN	RNA-binding protein 42	C (7)		2662	3642
SF3A2	C1	0.289836	-1.69625	-2.15144	-0.452294	-0.330129	-0.504238	-1.12406	0.574632	1.24314	-0.055276	0.00727045	0.426208	-0.282707	0.48257	0.334255	0.258208	0.948774	2.0315	-	-	-	-	mRNA Splicing - Major Pathway	WP_MRNA_PROCESSING	-	-	-	+	0.457958	0.455755	0.102795	0.983898	1.56174	0.0328606	Q15428	Q15428	SF3A2_HUMAN	Splicing factor 3A subunit 2	C (7)		2663	2072
SRSF6	C1	0.453308	-1.59562	-1.86291	-0.276702	-1.47437	-0.622601	-0.714149	-0.236656	0.834753	-0.282801	0.435341	0.0725738	0.505448	0.679559	0.599032	0.340434	1.09108	2.05428	-	-	-	HALLMARK_DNA_REPAIR	Cleavage of Growing Transcript in the Termination Region;mRNA 3'-end processing;mRNA Splicing - Major Pathway;mRNA Splicing - Minor Pathway;Transport of Mature mRNA derived from an Intron-Containing Transcript	WP_MRNA_PROCESSING	-	-	-	+	1.5134	0.0540984	0.267638	2.51475	2.64488	0.00276062	Q13247	Q13247;Q08170	SRSF6_HUMAN	Serine/arginine-rich splicing factor 6	C (7)		2664	1864
PNN	C1	-0.378194	-1.46311	-1.90261	-0.941339	-0.74029	-0.876997	-0.142496	0.364758	0.538544	-0.0202445	0.0444595	-0.205693	-0.0691689	1.48116	0.552268	0.436428	1.97055	1.35198	-	-	-	HALLMARK_E2F_TARGETS	-	-	-	-	-	+	1.5433	0.0511011	0.228396	2.5549	4.07556	0.000517928	Q9H307	Q9H307	PININ_HUMAN	Pinin	C (7)		2665	3838
DNAJC8	C1	-0.882695	-1.25229	-1.94584	-0.932818	-0.543094	-1.19881	0.377451	0.762713	0.505401	0.159072	0.324976	0.352723	-0.956983	1.28329	0.888686	0.446639	1.12273	1.48886	-	-	-	-	mRNA Splicing - Major Pathway	WP_MRNA_PROCESSING	-	-	-	+	0.353372	0.553899	0.0993449	0.798322	3.78197	0.000371945	O75937	O75937	DNJC8_HUMAN	DnaJ homolog subfamily C member 8	C (7)		2666	472
SNRPB2	C1	0.451954	-0.89627	-2.13354	-1.41635	-1.17566	-0.8654	-0.17552	0.114569	0.927913	-0.0246478	0.688112	0.509341	-0.456593	1.15408	0.198382	0.430164	0.92422	1.74524	-	-	-	HALLMARK_MYC_TARGETS_V1	mRNA Splicing - Major Pathway	WP_CILIARY_LANDSCAPE;WP_MRNA_PROCESSING	-	-	-	+	0.408826	0.498285	0.0672654	0.898386	2.63293	0.00771271	P08579	P08579	RU2B_HUMAN	U2 small nuclear ribonucleoprotein B''	C (7)		2667	729
PHF5A	C1	-0.588859	-0.668756	-2.47465	-1.34075	-0.219776	-0.621033	-0.381043	-0.192974	0.882464	0.540782	0.602931	-0.0122022	-0.355233	1.74817	0.871999	0.195867	0.670398	1.34266	-	-	-	HALLMARK_E2F_TARGETS	mRNA Splicing - Major Pathway	WP_MRNA_PROCESSING	-	-	-	+	0.688676	0.294199	0.148743	1.35642	2.66992	0.0030233	Q7RTV0	Q7RTV0	PHF5A_HUMAN	PHD finger-like domain-containing protein 5A	C (7)		2668	2605
DDX46	C1	0.0871383	-0.625029	-2.21433	-0.788162	-0.326131	-1.3165	-0.517074	0.199859	0.70044	0.101406	-0.0484686	-0.0149365	-0.281563	1.54812	1.30991	-0.587657	1.23637	1.53662	-	-	-	-	mRNA Splicing - Major Pathway	-	-	-	-	+	0.921327	0.18372	0.158652	1.70057	2.17672	0.0127144	Q7L014	Q7L014	DDX46_HUMAN	Probable ATP-dependent RNA helicase DDX46	C (7)		2669	2583
SNRPD2	C1	-0.0198956	-1.59522	-1.97472	-1.25836	-0.389275	-1.12754	-0.510021	1.48735	1.14482	0.00711755	0.661886	0.239108	-0.385152	1.03164	0.38888	0.647277	0.577848	1.07426	-	-	-	HALLMARK_MYC_TARGETS_V1	mRNA Splicing - Major Pathway;mRNA Splicing - Minor Pathway;snRNP Assembly	WP_MRNA_PROCESSING	-	-	-	+	0.0484841	0.928612	0.0140394	0.136198	2.95407	0.00225037	P62316	P62316	SMD2_HUMAN	Small nuclear ribonucleoprotein Sm D2	C (7)		2670	1571
SNRPG;SNRPGP15	C1	-0.601046	-1.24437	-2.47445	-0.765703	-0.107821	-1.07459	-0.196262	0.810876	0.710997	-0.0286543	1.34936	0.481181	0.176826	0.624785	-0.614154	0.640106	0.960617	1.3523	Unclassified_3	-	-	HALLMARK_MYC_TARGETS_V1	Cleavage of Growing Transcript in the Termination Region;mRNA Splicing - Major Pathway;mRNA Splicing - Minor Pathway;SLBP Dependent Processing of Replication-Dependent Histone Pre-mRNAs;SLBP independent Processing of Histone Pre-mRNAs;snRNP Assembly	WP_MRNA_PROCESSING	-	-	-	+	0.00202303	0.996923	0.000509262	0.00597186	2.80829	0.00432193	A8MWD9;P62308	A8MWD9;P62308	RUXGL_HUMAN;RUXG_HUMAN	Putative small nuclear ribonucleoprotein G-like protein 15	C (7)		2671	53
THRAP3	C1	-0.00504436	-1.42173	-2.80127	-0.39616	-0.152852	-0.9682	-0.846443	0.521718	1.02013	0.834568	0.592833	0.294858	-0.0710854	0.890787	0.270877	0.57552	1.19553	0.465967	-	-	-	-	PPARA activates gene expression;Transcriptional regulation of white adipocyte differentiation	WP_CIRCADIAN_RHYTHM_GENES;WP_INTERACTOME_OF_POLYCOMB_REPRESSIVE_COMPLEX_2_PRC2	-	-	-	+	0.185719	0.743771	0.0408169	0.464772	2.18985	0.00810372	Q9Y2W1	Q9Y2W1	TR150_HUMAN	Thyroid hormone receptor-associated protein 3	C (7)		2672	4511
SNRPB;SNRPN	C1	0.290481	-1.66529	-2.83146	-0.574961	-0.353413	-0.501787	-0.191595	0.377557	1.31412	0.677471	0.872263	-0.0236739	-0.282243	0.334626	0.159568	0.611831	0.664995	1.12151	Unclassified_3	-	-	HALLMARK_E2F_TARGETS	Cleavage of Growing Transcript in the Termination Region;mRNA Splicing - Major Pathway;mRNA Splicing - Minor Pathway;SLBP Dependent Processing of Replication-Dependent Histone Pre-mRNAs;SLBP independent Processing of Histone Pre-mRNAs;snRNP Assembly	WP_MRNA_PROCESSING;WP_PRADERWILLI_AND_ANGELMAN_SYNDROME	-	-	-	+	0.0842109	0.878506	-0.0205787	-0.228665	2.05593	0.00839599	P14678;P63162	P14678;P63162	RSMB_HUMAN;RSMN_HUMAN	Small nuclear ribonucleoprotein-associated proteins B and B'	C (7)		2673	852
SNRNP40	C1	-0.285381	-1.41066	-2.80452	0.433129	-0.590598	-1.11119	0.196609	0.471417	1.22628	0.293985	1.02177	0.55272	-0.417998	0.577333	-0.172018	0.40814	1.01726	0.593722	-	-	-	-	mRNA Splicing - Major Pathway;mRNA Splicing - Minor Pathway	WP_MRNA_PROCESSING	-	-	-	+	0.506672	0.416387	-0.0652184	-1.06618	2.28777	0.0103897	Q96DI7	Q96DI7	SNR40_HUMAN	U5 small nuclear ribonucleoprotein 40 kDa protein	C (7)		2674	3295
PABPN1	C1	-0.434206	-1.57447	-1.8029	0.0877571	-0.598743	-1.1058	-0.667606	0.600683	0.876395	-0.0373794	0.937878	0.689814	-0.230467	0.434094	-0.175333	-0.477463	1.82239	1.65537	-	-	-	-	Cleavage of Growing Transcript in the Termination Region;Inhibition of Host mRNA Processing and RNA Silencing;mRNA 3'-end processing;mRNA Splicing - Major Pathway;Processing of Intronless Pre-mRNAs	WP_MRNA_PROCESSING	-	-	-	+	0.079534	0.886283	0.0420926	0.216888	1.86125	0.00725581	Q86U42	Q86U42	PABP2_HUMAN	Polyadenylate-binding protein 2	C (7)		2675	2659
SNRNP70	C1	0.315166	-1.5687	-1.86868	-0.0765649	-0.77265	-0.777156	-1.05222	0.273579	1.20822	0.494606	0.911843	0.756496	-0.526095	-0.640209	0.436039	-0.129453	1.43778	1.57801	-	-	-	-	mRNA Splicing - Major Pathway	WP_MRNA_PROCESSING	-	-	-	+	0.050749	0.925235	-0.0191533	-0.14224	1.3168	0.0418909	P08621	P08621	RU17_HUMAN	U1 small nuclear ribonucleoprotein 70 kDa	C (7)		2676	730
SRSF1	C1	0.437839	-2.04232	-1.85243	0.00192974	-0.805364	-0.79336	-0.367693	0.427886	1.00986	-0.0677194	1.48743	0.741046	-0.512516	0.454363	0.746385	-0.878172	1.01792	0.994915	-	-	-	HALLMARK_E2F_TARGETS;HALLMARK_G2M_CHECKPOINT;HALLMARK_MYC_TARGETS_V1	Cleavage of Growing Transcript in the Termination Region;mRNA 3'-end processing;mRNA Splicing - Major Pathway;mRNA Splicing - Minor Pathway;Transport of Mature mRNA derived from an Intron-Containing Transcript	WP_MRNA_PROCESSING	-	-	-	+	0.221819	0.701408	-0.0726716	-0.541466	1.58505	0.0189061	Q07955	Q07955	SRSF1_HUMAN	Serine/arginine-rich splicing factor 1	C (7)		2677	1776
TCOF1	C1	-0.205326	-0.929533	-2.24809	-1.368	-0.355964	-1.03152	0.0377075	0.677482	0.829593	0.338332	0.468194	0.459031	1.14068	1.23004	0.112232	-1.14435	0.703728	1.28577	-	-	-	HALLMARK_MYC_TARGETS_V2	-	-	-	-	-	+	0.0789413	0.887072	0.0320735	0.215389	2.64051	0.00191835	Q13428	Q13428	TCOF_HUMAN	Treacle protein	C (7)		2678	1878
YY1	C1	-0.894204	-1.46158	-2.33886	-0.854113	-0.71829	-0.531695	0.13526	0.86869	0.973833	0.813337	0.655158	0.444008	-0.0284156	1.15165	-0.0702437	-0.363098	0.852634	1.36593	-	-	-	-	Activation of anterior HOX genes in hindbrain development during early embryogenesis;DNA Damage Recognition in GG-NER;TFAP2 (AP-2) family regulates transcription of growth factors and their receptors;UCH proteinases	WP_MALIGNANT_PLEURAL_MESOTHELIOMA;WP_MAMMARY_GLAND_DEVELOPMENT_PATHWAY_PREGNANCY_AND_LACTATION_STAGE_3_OF_4;WP_STEROL_REGULATORY_ELEMENTBINDING_PROTEINS_SREBP_SIGNALING	-	-	-	+	0.205091	0.720381	-0.084528	-0.506324	3.75723	0.000135116	P25490	P25490	TYY1_HUMAN	Transcriptional repressor protein YY1	C (7)		2679	1015
SNRPA1	C1	-0.466394	-1.01004	-2.4047	-0.736374	-0.0683714	-1.24764	-0.614292	0.812564	0.839395	-0.0615233	0.265618	0.358723	-0.109456	1.39485	0.507279	-0.123465	1.05546	1.60836	-	-	-	HALLMARK_MYC_TARGETS_V1	Gene and protein expression by JAK-STAT signaling after Interleukin-12 stimulation;mRNA Splicing - Major Pathway	WP_MRNA_PROCESSING	-	-	-	+	0.588809	0.357212	0.109658	1.20014	2.63252	0.00521794	P09661	P09661	RU2A_HUMAN	U2 small nuclear ribonucleoprotein A'	C (7)		2680	752
TCERG1	C1	-0.400817	-1.22114	-2.22773	-0.622729	-0.678073	-1.10615	-0.349254	0.67622	0.54959	0.328393	0.337342	0.366857	0.146468	1.23058	0.496133	-0.479154	0.88357	2.0699	-	-	-	-	-	-	-	-	-	+	0.492666	0.426889	0.110694	1.04276	3.024	0.00212649	O14776	O14776	TCRG1_HUMAN	Transcription elongation regulator 1	C (7)		2681	180
NUP35	C1	-0.539964	-1.02519	-2.39922	-1.1562	0.0240661	-1.26506	-0.0899035	0.775247	0.791155	-0.157766	-0.0118422	0.463486	0.805083	1.03877	-0.0143863	0.0872495	1.03962	1.63485	-	-	-	-	ISG15 antiviral mechanism;NEP/NS2 Interacts with the Cellular Export Machinery;NS1 Mediated Effects on Host Pathways;Nuclear import of Rev protein;Nuclear Pore Complex (NPC) Disassembly;Regulation of Glucokinase by Glucokinase Regulatory Protein;Regulation of HSF1-mediated heat shock response;Rev-mediated nuclear export of HIV RNA;snRNP Assembly;SUMOylation of chromatin organization proteins;SUMO…	-	-	-	-	+	0.787108	0.242655	0.15544	1.50489	3.27517	0.00083779	Q8NFH5	Q8NFH5	NUP35_HUMAN	Nucleoporin NUP35	C (7)		2682	2966
BCAS2	C1	-0.560709	-1.39489	-1.55917	-0.143768	-0.695163	-1.05621	-0.51866	0.832893	1.08702	-0.762133	0.104398	1.07818	0.417347	0.967713	0.442813	-0.935117	0.648838	2.04662	-	-	-	-	mRNA Splicing - Major Pathway	-	-	-	-	+	0.235867	0.683044	0.0545751	0.570481	1.92189	0.0272616	O75934	O75934	SPF27_HUMAN	Pre-mRNA-splicing factor SPF27	C (7)		2683	469
PLRG1	C1	-0.0345244	-1.87861	-2.26784	0.166517	-0.441046	-0.849575	-0.832331	0.432091	1.09076	-0.387769	0.350807	0.830722	0.542367	1.27399	-0.249044	0.269713	0.585637	1.39813	-	-	-	-	mRNA Splicing - Major Pathway	-	-	-	-	+	0.465278	0.449623	0.0840178	0.996414	1.89232	0.020844	O43660	O43660	PLRG1_HUMAN	Pleiotropic regulator 1	C (7)		2684	295
WDR70	C1	-0.10137	-1.03865	-1.97736	-0.691906	-0.786167	-1.39941	0.125764	0.338967	0.596546	0.105795	0.411263	0.437934	0.176262	0.681143	-0.176969	-0.377946	1.2631	2.41299	-	-	-	-	-	-	-	-	-	+	0.330047	0.578927	0.108676	0.754954	2.582	0.00265287	Q9NW82	Q9NW82	WDR70_HUMAN	WD repeat-containing protein 70	C (7)		2685	4138
IMPDH2	C1	-0.749925	-0.836824	-1.73038	-0.742519	-1.34307	-1.33861	-0.220654	0.781521	0.721996	0.754969	0.725968	0.615157	-0.178836	0.617733	0.0687815	-0.300958	1.10242	2.05322	Secretory_1	-	-	HALLMARK_DNA_REPAIR;HALLMARK_MYC_TARGETS_V1	Neutrophil degranulation;Purine ribonucleoside monophosphate biosynthesis	WP_RETT_SYNDROME_CAUSING_GENES	+	FDA approved drug targets	3	+	0.00234099	0.996428	-0.00148869	-0.00690795	3.59457	0.000154461	P12268	P12268	IMDH2_HUMAN	Inosine-5'-monophosphate dehydrogenase 2	C (7)	+	2686	820
SLX9	C1	-0.594334	-0.887445	-2.07296	-0.0121439	-1.63948	-0.974406	-0.17574	0.622915	0.685364	-0.206585	0.734897	0.460976	0.452293	0.745247	-0.597951	0.359161	1.24305	1.85714	-	-	-	-	-	-	-	-	-	+	0.376372	0.531632	0.174644	0.84032	2.82708	0.000612303	Q9NSI2	Q9NSI2	SLX9_HUMAN	Ribosome biogenesis protein SLX9 homolog	C (7)		2687	4076
RBM15	C1	-0.396992	-1.23002	-2.338	-0.212807	-0.590496	-0.175539	-0.905495	0.773869	0.79575	0.187335	0.195821	-0.0177293	0.467061	0.696839	-0.382373	-0.410333	1.86522	1.67789	-	-	-	-	RHO GTPases Activate Formins	-	-	-	-	+	0.477245	0.439684	0.119466	1.01675	1.66511	0.0233799	Q96T37	Q96T37	RBM15_HUMAN	RNA-binding protein 15	C (7)		2688	3514
DDX39B	C1	-0.137471	-1.54932	-2.40451	-0.587865	-0.170454	-0.788886	-0.412367	0.36587	1.16245	0.757717	0.663064	0.494087	0.695423	0.559039	-0.658026	-0.570535	1.31828	1.2635	-	-	-	-	Cleavage of Growing Transcript in the Termination Region;mRNA 3'-end processing;Transport of Mature mRNA derived from an Intron-Containing Transcript	-	-	-	-	+	0.0614383	0.91012	-0.0161905	-0.170413	2.05822	0.0139489	Q13838	Q13838	DX39B_HUMAN	Spliceosome RNA helicase DDX39B	C (7)		2689	1926
CMSS1	C1	-1.26683	-1.45747	-1.82003	0.350545	-1.09821	-1.25261	-0.308171	0.0269797	0.669424	0.0180872	0.537289	0.0525645	0.99769	1.25086	0.0552617	1.07175	0.810353	1.36251	-	+	STIC_Epithelium PAX8 pos	-	-	-	-	-	-	+	1.97002	0.0222904	0.551024	3.12868	4.28247	3.36e-05	Q9BQ75	Q9BQ75	CMS1_HUMAN	Protein CMSS1	C (7)		2690	3587
ALKBH2	C1	-0.744754	-1.64498	-1.47905	0.191655	-2.02511	-0.772727	-0.556082	0.282365	0.763548	0.0800993	0.844594	0.483557	0.523917	1.13402	-0.131541	1.33232	1.03576	0.682404	-	-	-	-	ALKBH2 mediated reversal of alkylation damage	-	-	-	-	+	0.771285	0.249922	0.309084	1.48134	3.43556	0.000134926	Q6NS38	Q6NS38	ALKB2_HUMAN	DNA oxidative demethylase ALKBH2	C (7)		2691	2442
FKBP1A	C1	-0.981005	-1.89739	-0.924754	-0.423884	-1.17575	-0.641198	-1.39136	0.659125	1.18584	-0.0546318	0.497439	0.262254	0.83937	1.84821	0.518464	0.357593	0.412932	0.908742	-	-	-	HALLMARK_TGF_BETA_SIGNALING	Calcineurin activates NFAT;TGF-beta receptor signaling activates SMADs;TGF-beta receptor signaling in EMT (epithelial to mesenchymal transition);TGFBR1 KD Mutants in Cancer;TGFBR1 LBD Mutants in Cancer;TGFBR2 Kinase Domain Mutants in Cancer	WP_CALCIUM_REGULATION_IN_CARDIAC_CELLS;WP_HEAD_AND_NECK_SQUAMOUS_CELL_CARCINOMA;WP_SPINAL_CORD_INJURY;WP_TARGET_OF_RAPAMYCIN_SIGNALING;WP_TGFBETA_RECEPTOR_SIGNALING;WP_TGFBETA_RECEPTOR_SIGNALING_IN_SKELETAL_DYSPLASIAS	+	FDA approved drug targets	20	+	0.758959	0.256297	0.242323	1.46292	3.02782	0.000850912	P62942	P62942	FKB1A_HUMAN	Peptidyl-prolyl cis-trans isomerase FKBP1A	C (7)		2692	1604
GPATCH4	C1	-1.29719	-1.08778	-0.175231	-0.00367993	-1.09878	-1.50669	-1.22915	0.560891	0.674558	0.12575	0.0841759	0.492428	0.564485	0.878158	-0.961183	0.940682	0.987711	2.05084	-	-	-	-	-	-	-	-	-	+	0.635611	0.326727	0.515866	1.27418	2.01902	0.00206056	Q5T3I0	Q5T3I0	GPTC4_HUMAN	G patch domain-containing protein 4	C (7)		2693	2321
CHEK2	C1	-1.24667	-1.22267	-0.95537	-0.488794	-0.627815	-1.14387	-1.42575	0.462649	0.526389	0.30379	0.365398	0.596752	0.805978	1.61906	-0.683141	1.64519	0.25085	1.21803	-	-	-	HALLMARK_E2F_TARGETS	Chk1/Chk2(Cds1) mediated inactivation of Cyclin B:Cdk1 complex;G2/M DNA damage checkpoint;Recruitment and ATM-mediated phosphorylation of repair and signaling proteins at DNA double strand breaks;Regulation of TP53 Activity through Methylation;Regulation of TP53 Activity through Phosphorylation;Regulation of TP53 Degradation;Stabilization of p53;Ubiquitin Mediated Degradation of Phosphorylated Cd…	WP_ATM_SIGNALING_IN_DEVELOPMENT_AND_DISEASE;WP_ATM_SIGNALING_PATHWAY;WP_CELL_CYCLE;WP_DNA_DAMAGE_RESPONSE;WP_DNA_IRDAMAGE_AND_CELLULAR_RESPONSE_VIA_ATR;WP_DNA_IRDOUBLE_STRAND_BREAKS_AND_CELLULAR_RESPONSE_VIA_ATM;WP_INTEGRATED_CANCER_PATHWAY;WP_MIRNA_REGULATION_OF_DNA_DAMAGE_RESPONSE;WP_MIRNA_REGULATION_OF_P53_PATHWAY_IN_PROSTATE_CANCER;WP_PATHWAYS_AFFECTED_IN_ADENOID_CYSTIC_CARCINOMA	-	-	-	+	0.706864	0.283953	0.681035	1.38423	2.63583	0.000389884	O96017	O96017	CHK2_HUMAN	Serine/threonine-protein kinase Chk2	C (7)		2694	603
STARD7	C1	-0.508349	-1.80252	-0.589463	0.429261	-0.695956	-2.01298	-1.43709	0.708168	0.937291	-0.759495	0.677226	0.756964	0.963157	0.756919	0.432114	1.01546	0.479434	0.649856	-	-	-	HALLMARK_MYC_TARGETS_V1	Synthesis of PC	WP_2Q112_COPY_NUMBER_VARIATION_SYNDROME	-	-	-	+	0.693882	0.291044	0.495885	1.3644	1.95751	0.00224318	Q9NQZ5	Q9NQZ5	STAR7_HUMAN	StAR-related lipid transfer protein 7, mitochondrial	C (7)		2695	4034
FHL2	C1	-0.52424	-1.42911	-0.235026	-0.0820523	-1.61801	-1.99298	-0.975634	1.14632	0.688773	-0.0556644	0.945833	0.242831	0.0843679	1.06941	-0.227543	0.620254	1.21017	1.13231	-	-	-	HALLMARK_ESTROGEN_RESPONSE_EARLY;HALLMARK_UV_RESPONSE_DN	PPARA activates gene expression	WP_ANDROGEN_RECEPTOR_SIGNALING_PATHWAY;WP_ECTODERM_DIFFERENTIATION;WP_RANKLRANK_SIGNALING_PATHWAY;WP_VEGFAVEGFR2_SIGNALING	-	-	-	+	0.346835	0.559737	0.352599	0.78625	2.4339	0.000569485	Q14192	Q14192	FHL2_HUMAN	Four and a half LIM domains protein 2	C (7)		2696	1958
NIP7	C1	-0.417688	-1.76707	-0.70679	-0.184807	-0.634502	-2.56901	0.621397	0.851897	0.831626	-0.338699	0.300096	-0.186999	0.892556	0.974858	-0.185336	1.11003	0.947401	0.461041	-	-	-	HALLMARK_MYC_TARGETS_V2	Major pathway of rRNA processing in the nucleolus and cytosol	-	-	-	-	+	0.60338	0.347469	0.21491	1.22335	3.00096	0.000360322	Q9Y221	Q9Y221	NIP7_HUMAN	60S ribosome subunit biogenesis protein NIP7 homolog	C (7)		2697	4468
RPP30	C1	-0.518814	-0.800407	-1.49954	-0.409069	-0.957724	-0.860667	-1.01104	0.356207	0.422832	-0.344172	-0.0354059	0.26287	0.998025	1.08694	-1.0856	1.56368	0.829149	2.00274	-	-	-	-	Major pathway of rRNA processing in the nucleolus and cytosol;tRNA processing in the nucleus	-	-	-	-	+	1.10658	0.125991	0.524974	1.96152	2.50244	0.00116805	P78346	P78346	RPP30_HUMAN	Ribonuclease P protein subunit p30	C (7)		2698	1630
PRPF40A	C1	0.0690476	-0.827996	-1.97586	-0.149166	-0.65478	-1.24805	-1.2192	-0.194467	0.460187	-0.184455	0.394717	0.210445	0.111517	0.893136	-0.36531	1.43336	1.34268	1.9042	-	-	-	-	mRNA Splicing - Major Pathway	WP_MRNA_PROCESSING	-	-	-	+	1.3178	0.08122	0.211274	2.2509	2.28951	0.0110776	O75400	O75400	PR40A_HUMAN	Pre-mRNA-processing factor 40 homolog A	C (7)		2699	415
AAAS	C1	-0.643771	-0.997764	-1.63584	-0.761785	-1.45974	-0.80451	-0.186985	-0.0415485	0.189771	-0.179317	0.0566795	0.302141	0.816422	0.447548	-0.0885926	1.63759	1.36693	1.98278	-	+	STIC_Epithelium PAX8 pos	HALLMARK_DNA_REPAIR	ISG15 antiviral mechanism;NEP/NS2 Interacts with the Cellular Export Machinery;NS1 Mediated Effects on Host Pathways;Nuclear import of Rev protein;Nuclear Pore Complex (NPC) Disassembly;Regulation of Glucokinase by Glucokinase Regulatory Protein;Regulation of HSF1-mediated heat shock response;Rev-mediated nuclear export of HIV RNA;snRNP Assembly;SUMOylation of chromatin organization proteins;SUMO…	-	-	-	-	+	1.92089	0.0245957	0.384967	3.06226	4.67666	8.82e-05	Q9NRG9	Q9NRG9	AAAS_HUMAN	Aladin	C (7)		2700	4046
GTPBP4	C1	-0.882138	-1.07773	-1.59533	-0.690737	-1.12667	-1.02605	-0.213271	0.123945	0.375888	-0.0636294	0.0927078	0.0517006	0.69517	1.00393	-0.401012	1.9968	1.1281	1.60833	-	+	STIC_Epithelium PAX8 pos	-	-	WP_HAIR_FOLLICLE_DEVELOPMENT_CYTODIFFERENTIATION_PART_3_OF_3;WP_HAIR_FOLLICLE_DEVELOPMENT_ORGANOGENESIS_PART_2_OF_3	-	-	-	+	1.66154	0.0407505	0.55058	2.71355	4.63973	3.02e-05	Q9BZE4	Q9BZE4	GTPB4_HUMAN	GTP-binding protein 4	C (7)		2701	3739
RANBP2	C1	-0.148947	-0.851501	-2.09582	-0.700192	-1.01021	-0.993722	-0.506127	0.302243	0.542183	-0.55514	0.132773	0.293705	1.05779	0.644963	-0.400724	1.97063	1.30539	1.0127	-	-	-	-	Amplification of signal from unattached kinetochores via a MAD2 inhibitory signal;ISG15 antiviral mechanism;Mitotic Prometaphase;NEP/NS2 Interacts with the Cellular Export Machinery;NS1 Mediated Effects on Host Pathways;Nuclear import of Rev protein;Nuclear Pore Complex (NPC) Disassembly;Regulation of Glucokinase by Glucokinase Regulatory Protein;Regulation of HSF1-mediated heat shock response;Re…	-	-	-	-	+	1.43754	0.0631325	0.155274	2.41271	3.29815	0.00558437	P49792	P49792	RBP2_HUMAN	E3 SUMO-protein ligase RanBP2	C (7)		2702	1340
SMARCC1	C1	-0.597004	-0.868321	-1.19905	-0.475878	-1.03976	-1.19672	-0.627472	-0.23115	0.0361313	-0.349825	-0.149956	-0.0931265	0.922665	1.18278	-0.377282	1.37963	1.95844	1.72588	-	+	STIC_Epithelium PAX8 pos	HALLMARK_G2M_CHECKPOINT;HALLMARK_MYC_TARGETS_V1;HALLMARK_PEROXISOME	RMTs methylate histone arginines;RUNX1 interacts with co-factors whose precise effect on RUNX1 targets is not known	WP_THERMOGENESIS;WP_TUMOR_SUPPRESSOR_ACTIVITY_OF_SMARCB1	-	-	-	+	2.52904	0.00833195	0.98278	3.90068	4.5859	3.36e-05	Q92922	Q92922	SMRC1_HUMAN	SWI/SNF complex subunit SMARCC1	C (7)		2703	3187
EIF4G1	C1	-0.875527	-1.01778	-1.24168	-0.814967	-1.10789	-1.4717	-0.413548	-0.161952	-0.249744	0.0546361	0.165143	0.14345	1.15511	1.28422	0.254003	1.25085	1.65019	1.39718	-	+	STIC_Epithelium PAX8 pos	HALLMARK_UNFOLDED_PROTEIN_RESPONSE	Activation of the mRNA upon binding of the cap-binding complex and eIFs, and subsequent binding to 43S;AUF1 (hnRNP D0) binds and destabilizes mRNA;Deadenylation of mRNA;GTP hydrolysis and joining of the 60S ribosomal subunit;ISG15 antiviral mechanism;L13a-mediated translational silencing of Ceruloplasmin expression;mTORC1-mediated signalling;Nonsense Mediated Decay (NMD) enhanced by the Exon Junc…	WP_ACUTE_VIRAL_MYOCARDITIS;WP_FRAGILE_X_SYNDROME;WP_MALIGNANT_PLEURAL_MESOTHELIOMA;WP_TRANSLATION_FACTORS;WP_TRANSLATION_INHIBITORS_IN_CHRONICALLY_ACTIVATED_PDGFRA_CELLS;WP_VEGFAVEGFR2_SIGNALING	-	-	-	+	3.71363	0.00114595	0.596704	5.71839	7.47776	0	Q04637	Q04637	IF4G1_HUMAN	Eukaryotic translation initiation factor 4 gamma 1	C (7)		2704	1736
PABPC4	C1	-0.715818	-0.791637	-1.19648	-0.982342	-1.45955	-1.49142	-0.337063	-0.139853	0.0904058	0.250656	0.146478	0.207955	0.494928	1.5094	0.0631145	1.44407	1.4179	1.48925	-	+	STIC_Epithelium PAX8 pos	HALLMARK_MYC_TARGETS_V1	-	-	-	-	-	+	2.44751	0.00958056	0.665571	3.78569	5.89413	0	Q13310	Q13310	PABP4_HUMAN	Polyadenylate-binding protein 4	C (7)		2705	1868
TOP1	C1	-0.726307	-0.893733	-1.24606	-0.697748	-1.63375	-1.41462	-0.16314	-0.237165	0.277111	0.25263	0.314368	0.204268	0.583548	1.46248	-0.282355	1.64209	1.08992	1.46846	-	+	STIC_Epithelium PAX8 pos	HALLMARK_G2M_CHECKPOINT;HALLMARK_HEME_METABOLISM	SUMOylation of DNA replication proteins	WP_CIRCADIAN_RHYTHM_GENES;WP_EBOLA_VIRUS_INFECTION_IN_HOST	+	Cancer-related genes, FDA approved drug targets, Proto-oncogene	20	+	1.73947	0.0351359	0.493147	2.81812	4.95405	3.35e-05	P11387	P11387	TOP1_HUMAN	DNA topoisomerase 1	C (7)		2706	804
DDX21	C1	-0.76161	-1.04059	-1.28626	-0.77364	-1.13595	-1.33058	-0.420836	0.105903	0.322397	-0.0331935	-0.0659004	0.0757174	1.1541	1.59023	-0.486169	1.55621	1.25835	1.27182	Secretory_3	+	STIC_Epithelium PAX8 pos	HALLMARK_MYC_TARGETS_V1;HALLMARK_UV_RESPONSE_UP	B-WICH complex positively regulates rRNA expression;Major pathway of rRNA processing in the nucleolus and cytosol	WP_7Q1123_COPY_NUMBER_VARIATION_SYNDROME	-	-	-	+	2.01476	0.0203019	1.10194	3.18928	5.04179	0	Q9NR30	Q9NR30	DDX21_HUMAN	Nucleolar RNA helicase 2	C (7)		2707	4036
PUS7	C1	-0.438401	-0.740208	-0.901749	-0.383098	-1.21088	-2.31827	-0.561979	-0.0748819	0.253384	0.112204	0.31828	0.389748	0.274414	1.15515	-0.1974	1.62666	1.15322	1.54381	-	+	STIC_Epithelium PAX8 pos	-	tRNA modification in the nucleus and cytosol	-	-	-	-	+	1.56133	0.0495017	0.594052	2.57911	3.48117	0.000135544	Q96PZ0	Q96PZ0	PUS7_HUMAN	Pseudouridylate synthase 7 homolog	C (7)		2708	3466
GATAD2A	C1	-1.17408	-1.05543	-2.21359	0.113992	0.0124408	-1.16513	-0.539199	0.31136	-0.0892697	-0.611069	0.390681	0.170758	0.573422	1.56445	0.136628	0.80875	1.30025	1.46504	-	+	STIC_Epithelium PAX8 pos	-	ERCC6 (CSB) and EHMT2 (G9a) positively regulate rRNA expression;HDACs deacetylate histones;Regulation of PTEN gene transcription;Regulation of TP53 Activity through Acetylation;RNA Polymerase I Transcription Initiation	-	-	-	-	+	2.29907	0.0122397	0.315967	3.57869	3.24975	0.00107861	Q86YP4	Q86YP4	P66A_HUMAN	Transcriptional repressor p66-alpha	C (7)		2709	2706
ZC3HC1	C1	-1.56814	-1.26668	-1.32244	0.124083	0.05117	-1.82622	0.428666	0.433573	0.620714	-0.622608	-0.0940022	0.429663	0.49873	0.963158	-0.487574	0.79105	0.973857	1.873	-	-	-	-	-	-	-	-	-	+	0.817283	0.228386	0.0937365	1.54949	2.62501	0.0140583	Q86WB0	Q86WB0	ZC3C1_HUMAN	Zinc finger C3HC-type protein 1	C (7)		2710	2682
NUP85	C1	-0.537913	-1.14996	-2.45305	-0.49438	-0.874525	-1.21864	-0.135273	0.219381	0.516053	-0.504222	0.322003	1.02715	1.12587	0.80612	0.395011	1.29475	0.846351	0.81527	-	-	-	-	Amplification of signal from unattached kinetochores via a MAD2 inhibitory signal;ISG15 antiviral mechanism;Mitotic Prometaphase;NEP/NS2 Interacts with the Cellular Export Machinery;NS1 Mediated Effects on Host Pathways;Nuclear import of Rev protein;Nuclear Pore Complex (NPC) Disassembly;Regulation of Glucokinase by Glucokinase Regulatory Protein;Regulation of HSF1-mediated heat shock response;Re…	-	-	-	-	+	1.54568	0.050947	0.156832	2.5581	4.36257	0.000486377	Q9BW27	Q9BW27	NUP85_HUMAN	Nuclear pore complex protein Nup85	C (7)		2711	3690
NUP98	C1	-0.552221	-1.19884	-2.28078	-0.603181	-0.87916	-1.02544	-0.401314	0.540719	0.472437	-0.360839	0.107228	0.338372	1.38273	0.562647	0.163296	1.35779	1.1108	1.26575	-	+	STIC_Epithelium PAX8 pos	HALLMARK_G2M_CHECKPOINT	-	WP_SARSCOV2_INNATE_IMMUNITY_EVASION_AND_CELLSPECIFIC_IMMUNE_RESPONSE	-	-	-	+	2.05547	0.0187818	0.177084	3.24457	4.63153	0.000651991	P52948	P52948	NUP98_HUMAN	Nuclear pore complex protein Nup98-Nup96	C (7)		2712	1419
LARP7	C1	-0.381722	-1.61631	-1.86722	-1.09304	-1.11573	-1.18459	0.0212817	0.236147	0.741895	0.246199	0.65214	0.449476	0.883765	1.37233	-0.223607	1.26259	0.76908	0.847319	-	-	-	-	-	WP_VEGFAVEGFR2_SIGNALING	-	-	-	+	0.897427	0.192553	0.151803	1.66621	5.35918	4.59e-05	Q4G0J3	Q4G0J3	LARP7_HUMAN	La-related protein 7	C (7)		2713	2216
RAE1	C1	-0.467224	-1.75473	-1.68387	-0.739045	-1.18161	-1.41069	0.0942876	0.276373	0.252104	0.238844	0.35724	0.494588	0.67665	1.22355	0.108585	1.494	0.769897	1.25106	-	+	STIC_Epithelium PAX8 pos	HALLMARK_DNA_REPAIR	ISG15 antiviral mechanism;NEP/NS2 Interacts with the Cellular Export Machinery;NS1 Mediated Effects on Host Pathways;Nuclear import of Rev protein;Nuclear Pore Complex (NPC) Disassembly;Regulation of Glucokinase by Glucokinase Regulatory Protein;Regulation of HSF1-mediated heat shock response;Rev-mediated nuclear export of HIV RNA;snRNP Assembly;SUMOylation of chromatin organization proteins;SUMO…	WP_IL18_SIGNALING_PATHWAY;WP_SARSCOV2_INNATE_IMMUNITY_EVASION_AND_CELLSPECIFIC_IMMUNE_RESPONSE	-	-	-	+	1.8617	0.0274688	0.181045	2.98246	5.99802	4.81e-05	P78406	P78406	RAE1L_HUMAN	mRNA export factor RAE1	C (7)		2714	1636
ILF3	C1	-0.586391	-1.64728	-2.40784	-0.68684	-0.670598	-0.985541	-0.326402	0.0332038	0.8291	0.477406	0.541821	0.314351	0.986077	1.21832	0.367304	0.952876	0.985694	0.604737	-	+	STIC_Epithelium PAX8 pos	HALLMARK_E2F_TARGETS;HALLMARK_G2M_CHECKPOINT	-	-	-	-	-	+	1.569	0.0489861	0.209819	2.58941	4.77337	7.81e-05	Q12906	Q96SI9;Q12906	ILF3_HUMAN	Interleukin enhancer-binding factor 3	C (7)		2715	1834
ILF2	C1	-0.479224	-1.32579	-2.27481	-1.02789	-1.03239	-0.778616	-0.0365847	0.023902	0.717426	-0.13777	0.331527	0.387013	1.41458	1.12633	0.16026	1.26021	0.964409	0.707407	-	+	STIC_Epithelium PAX8 pos	HALLMARK_MYC_TARGETS_V1	Neutrophil degranulation	WP_B_CELL_RECEPTOR_SIGNALING_PATHWAY	-	-	-	+	2.0175	0.020141	0.231328	3.19301	5.18749	8.56e-05	Q12905	Q12905	ILF2_HUMAN	Interleukin enhancer-binding factor 2	C (7)		2716	1833
NIFK	C1	-0.638762	-0.778501	-2.64858	-0.690742	-1.01359	-1.15284	-0.027503	0.326286	0.554085	0.340876	0.581122	0.637445	0.717658	0.983681	-0.288544	0.876776	1.28609	0.935038	-	-	-	-	-	-	-	-	-	+	0.74182	0.264258	0.326993	1.43718	4.22173	3.21e-05	Q9BYG3	Q9BYG3	MK67I_HUMAN	MKI67 FHA domain-interacting nucleolar phosphoprotein	C (7)		2717	3727
CEBPZ	C1	-0.739174	-0.743043	-2.86625	-0.599675	-0.71593	-0.854959	0.0391651	0.337377	0.761678	0.313213	0.414539	0.447602	0.805779	0.922007	-0.565189	1.00352	1.09661	0.942728	-	-	-	-	-	WP_ENDODERM_DIFFERENTIATION;WP_GASTRIC_CANCER_NETWORK_2	-	-	-	+	0.559587	0.37728	0.269954	1.15311	3.35055	0.000129032	Q03701	Q03701	CEBPZ_HUMAN	CCAAT/enhancer-binding protein zeta	C (7)		2718	1731
DDX52	C1	-0.957879	-0.698829	-2.63014	-0.854086	-1.18787	-0.774359	0.20836	0.214079	0.66055	0.26073	0.569795	0.451689	1.09242	1.30669	-0.0514157	0.734374	0.815788	0.840106	-	-	-	-	Major pathway of rRNA processing in the nucleolus and cytosol;rRNA modification in the nucleus and cytosol	WP_17Q12_COPY_NUMBER_VARIATION_SYNDROME	-	-	-	+	1.08224	0.132567	0.302194	1.9277	4.78115	1.62e-05	Q9Y2R4	Q9Y2R4	DDX52_HUMAN	Probable ATP-dependent RNA helicase DDX52	C (7)		2719	4504
OLA1	C1	-0.951962	-1.09043	-1.71808	-1.13623	-1.28213	-0.822487	0.223288	0.105727	0.83986	0.210391	-0.218629	0.334809	1.61907	1.35304	-0.0803332	0.5459	1.5218	0.546409	-	-	-	-	Platelet degranulation	-	-	-	-	+	1.23908	0.095792	0.187961	2.14378	5.23744	0.000129129	Q9NTK5	Q9NTK5	OLA1_HUMAN	Obg-like ATPase 1	C (7)		2720	4085
TATDN1	C1	-0.935159	-0.513932	-2.08504	-0.884885	-1.36359	-1.21434	0.185757	0.0438694	0.452661	0.44665	0.432851	0.277021	1.74517	0.856788	-0.226694	0.88832	1.31952	0.575039	-	-	-	-	-	-	-	-	-	+	1.10285	0.127027	0.349585	1.95635	4.84375	2.98e-05	Q6P1N9	Q6P1N9	TATD1_HUMAN	Deoxyribonuclease TATDN1	C (7)		2721	2470
NUP210	C1	-0.86226	-0.939105	-1.6413	-0.830046	-1.40117	-1.41048	-0.151079	0.168562	0.397875	-0.0202182	0.0917009	0.35943	1.83256	1.13253	0.342581	0.838254	1.19092	0.901241	-	+	STIC_Epithelium PAX8 pos	-	ISG15 antiviral mechanism;NEP/NS2 Interacts with the Cellular Export Machinery;NS1 Mediated Effects on Host Pathways;Nuclear import of Rev protein;Nuclear Pore Complex (NPC) Disassembly;Regulation of Glucokinase by Glucokinase Regulatory Protein;Regulation of HSF1-mediated heat shock response;Rev-mediated nuclear export of HIV RNA;snRNP Assembly;SUMOylation of chromatin organization proteins;SUMO…	-	-	-	-	+	2.67576	0.00648649	0.488686	4.11022	6.92164	0	Q8TEM1	Q8TEM1	PO210_HUMAN	Nuclear pore membrane glycoprotein 210	C (7)		2722	3046
HMGB3	C1	-0.331395	-0.935367	-2.15538	-0.648225	-1.32086	-1.57022	-0.374293	0.240885	0.688509	0.403717	0.273087	0.204108	1.36443	1.26634	0.419054	0.643436	1.08106	0.751107	Unclassified_3	+	STIC_Epithelium PAX8 pos	HALLMARK_E2F_TARGETS;HALLMARK_G2M_CHECKPOINT	-	-	-	-	-	+	2.0707	0.0181364	0.419304	3.26529	5.15628	5.68e-06	O15347	O15347	HMGB3_HUMAN	High mobility group protein B3	C (7)		2723	234
PPP1CA	C1	-1.00058	-0.996267	-1.94463	-1.22078	-0.555951	-1.58713	0.435647	0.280637	0.331024	0.493587	0.501823	0.634464	1.51365	0.858976	-0.240583	0.353144	0.824031	1.31895	Unclassified_3	-	-	HALLMARK_PI3K_AKT_MTOR_SIGNALING;HALLMARK_TGF_BETA_SIGNALING	Circadian Clock;DARPP-32 events;Downregulation of TGF-beta receptor signaling;Triglyceride catabolism	WP_CIRCADIAN_RHYTHM_GENES;WP_COMMON_PATHWAYS_UNDERLYING_DRUG_ADDICTION;WP_ENDOPLASMIC_RETICULUM_STRESS_RESPONSE_IN_CORONAVIRUS_INFECTION;WP_FOCAL_ADHESION;WP_FRAGILE_X_SYNDROME;WP_HIPPOMERLIN_SIGNALING_DYSREGULATION;WP_NETRINUNC5B_SIGNALING_PATHWAY;WP_NEUROINFLAMMATION_AND_GLUTAMATERGIC_SIGNALING;WP_NICOTINE_EFFECT_ON_DOPAMINERGIC_NEURONS;WP_SPHINGOLIPID_PATHWAY;WP_VEGFAVEGFR2_SIGNALING	-	-	-	+	0.599352	0.350213	0.128387	1.21695	5.29948	3.33e-05	P62136	P62136	PP1A_HUMAN	Serine/threonine-protein phosphatase PP1-alpha catalytic subunit	C (7)		2724	1553
PUF60	C1	-0.500348	-1.3354	-2.20843	-1.11713	-0.705693	-0.611279	-0.270987	-0.199933	0.475994	0.0563715	0.291181	0.0891594	1.32764	0.816078	0.534355	0.565946	1.94407	0.848417	-	+	STIC_Epithelium PAX8 pos	-	mRNA Splicing - Major Pathway	-	-	-	-	+	2.41566	0.0100647	0.368526	3.74102	4.79575	6.64e-05	Q9UHX1	Q9UHX1	PUF60_HUMAN	Poly(U)-binding-splicing factor PUF60	C (7)		2725	4331
NUP88	C1	-0.368181	-1.72005	-2.2714	-0.839623	-0.438313	-0.950947	-0.354946	0.647961	0.383167	0.168601	0.329857	0.207663	1.35611	0.214318	0.155528	0.877907	1.35716	1.24517	-	-	-	-	ISG15 antiviral mechanism;NEP/NS2 Interacts with the Cellular Export Machinery;NS1 Mediated Effects on Host Pathways;Nuclear import of Rev protein;Nuclear Pore Complex (NPC) Disassembly;Regulation of Glucokinase by Glucokinase Regulatory Protein;Regulation of HSF1-mediated heat shock response;Rev-mediated nuclear export of HIV RNA;snRNP Assembly;SUMOylation of chromatin organization proteins;SUMO…	WP_CILIARY_LANDSCAPE	-	-	-	+	1.43069	0.063846	0.0822008	2.40348	4.03243	0.00755724	Q99567	Q99567	NUP88_HUMAN	Nuclear pore complex protein Nup88	C (7)		2726	3533
NUP188	C1	0.558231	-0.516412	-2.54361	-0.947324	-0.388818	-1.18572	-0.129197	-0.401556	0.46558	-0.318336	-0.495364	0.624027	1.45866	0.297042	0.143834	1.2682	0.672115	1.43865	-	+	STIC_Epithelium PAX8 pos	-	ISG15 antiviral mechanism;NEP/NS2 Interacts with the Cellular Export Machinery;NS1 Mediated Effects on Host Pathways;Nuclear import of Rev protein;Nuclear Pore Complex (NPC) Disassembly;Regulation of Glucokinase by Glucokinase Regulatory Protein;Regulation of HSF1-mediated heat shock response;Rev-mediated nuclear export of HIV RNA;snRNP Assembly;SUMOylation of chromatin organization proteins;SUMO…	-	-	-	-	+	1.87173	0.0269835	0.190707	2.99596	2.39899	0.0105384	Q5SRE5	Q5SRE5	NU188_HUMAN	Nucleoporin NUP188	C (7)		2727	2298
NUP160	C1	-0.345499	-0.960021	-1.74321	-0.416526	-1.27957	-0.989471	-0.0736834	0.0214227	0.0952173	-0.809334	-0.0279266	0.589227	2.3352	0.0723568	0.432423	1.22232	0.613522	1.26355	-	+	STIC_Epithelium PAX8 pos	-	Amplification of signal from unattached kinetochores via a MAD2 inhibitory signal;ISG15 antiviral mechanism;Mitotic Prometaphase;NEP/NS2 Interacts with the Cellular Export Machinery;NS1 Mediated Effects on Host Pathways;Nuclear import of Rev protein;Nuclear Pore Complex (NPC) Disassembly;Regulation of Glucokinase by Glucokinase Regulatory Protein;Regulation of HSF1-mediated heat shock response;Re…	-	-	-	-	+	1.66838	0.0402902	0.136196	2.72273	3.59766	0.00976226	Q12769	Q12769	NU160_HUMAN	Nuclear pore complex protein Nup160	C (7)		2728	1812
NUP205	C1	-0.329972	-0.63051	-1.90777	-0.926742	-1.20018	-0.83505	-0.191431	-0.106962	0.33283	-0.382359	-0.0289765	0.0733041	1.61027	0.435783	-0.216368	0.908698	1.44649	1.94894	-	+	STIC_Epithelium PAX8 pos	HALLMARK_E2F_TARGETS;HALLMARK_MTORC1_SIGNALING	ISG15 antiviral mechanism;NEP/NS2 Interacts with the Cellular Export Machinery;NS1 Mediated Effects on Host Pathways;Nuclear import of Rev protein;Nuclear Pore Complex (NPC) Disassembly;Regulation of Glucokinase by Glucokinase Regulatory Protein;Regulation of HSF1-mediated heat shock response;Rev-mediated nuclear export of HIV RNA;snRNP Assembly;SUMOylation of chromatin organization proteins;SUMO…	-	-	-	-	+	1.9559	0.0228994	0.199337	3.10957	3.95447	0.00214344	Q92621	Q92621	NU205_HUMAN	Nuclear pore complex protein Nup205	C (7)		2729	3156
NUP155	C1	-0.639953	-1.18177	-1.75905	-0.699455	-0.601977	-1.18875	-0.141623	0.287729	0.470596	-0.572259	-0.191187	0.344587	1.49305	1.00397	-0.203992	0.466982	0.971211	2.1419	-	-	-	-	ISG15 antiviral mechanism;NEP/NS2 Interacts with the Cellular Export Machinery;NS1 Mediated Effects on Host Pathways;Nuclear import of Rev protein;Nuclear Pore Complex (NPC) Disassembly;Regulation of Glucokinase by Glucokinase Regulatory Protein;Regulation of HSF1-mediated heat shock response;Rev-mediated nuclear export of HIV RNA;snRNP Assembly;SUMOylation of chromatin organization proteins;SUMO…	-	-	-	-	+	1.55085	0.0505638	0.202948	2.56505	3.92043	0.0013415	O75694	O75694	NU155_HUMAN	Nuclear pore complex protein Nup155	C (7)		2730	448
NUP93	C1	-0.207568	-0.665543	-2.17354	-0.158596	-0.765979	-0.802145	-0.864881	0.160409	0.0842405	-0.24632	-0.28564	0.448968	1.95453	0.928152	-0.569445	0.316657	1.06861	1.77809	-	-	-	HALLMARK_INTERFERON_GAMMA_RESPONSE	ISG15 antiviral mechanism;NEP/NS2 Interacts with the Cellular Export Machinery;NS1 Mediated Effects on Host Pathways;Nuclear import of Rev protein;Nuclear Pore Complex (NPC) Disassembly;Regulation of Glucokinase by Glucokinase Regulatory Protein;Regulation of HSF1-mediated heat shock response;Rev-mediated nuclear export of HIV RNA;snRNP Assembly;SUMOylation of chromatin organization proteins;SUMO…	-	-	-	-	+	1.43984	0.0629605	0.207392	2.4158	2.4062	0.011125	Q8N1F7	Q8N1F7	NUP93_HUMAN	Nuclear pore complex protein Nup93	C (7)		2731	2824
MRGBP	C1	-0.473917	-0.685219	-1.74017	-0.867835	-0.872191	-1.05517	-0.668998	0.53671	-0.334699	-0.236397	0.457051	0.227248	0.41011	1.11945	1.62038	-0.60861	1.44937	1.72289	-	-	-	-	HATs acetylate histones	-	-	-	-	+	1.34872	0.0760455	0.304391	2.2928	3.30939	0.00086558	Q9NV56	Q9NV56	MRGBP_HUMAN	MRG/MORF4L-binding protein	C (7)		2732	4108
G3BP1	C1	-0.587842	-1.43466	-1.37713	-0.25622	-1.04808	-1.51841	-0.500326	0.0226348	0.273459	0.267634	0.346553	0.29317	0.730597	1.44705	1.32286	-0.657165	0.993709	1.68217	-	-	-	HALLMARK_G2M_CHECKPOINT;HALLMARK_MYC_TARGETS_V1	-	WP_REGUCALCIN_IN_PROXIMAL_TUBULE_EPITHELIAL_KIDNEY_CELLS	-	-	-	+	1.26496	0.0906424	0.382382	2.17908	3.74285	0.000159363	Q13283	Q13283	G3BP1_HUMAN	Ras GTPase-activating protein-binding protein 1	C (7)		2733	1866
SUB1	C1	-1.13488	-1.07763	-0.893841	-0.114396	-0.469853	-1.47812	-0.0799071	-0.194384	-0.276694	-0.27011	0.204551	0.0861365	0.340357	0.745628	0.962833	-0.61697	2.18769	2.07959	-	-	-	-	-	-	-	-	-	+	1.38852	0.0699814	0.536644	2.3466	2.84982	0.000639398	P53999	P53999	TCP4_HUMAN	Activated RNA polymerase II transcriptional coactivator p15	C (7)		2734	1433
ARHGEF2	C1	-1.19843	-0.963492	-0.986589	-1.13396	-1.27975	-1.49073	0.00668871	-0.0224205	-0.0327143	0.137589	0.279577	0.24535	0.36199	0.846598	1.0104	0.975958	1.25146	1.99248	-	+	STIC_Epithelium PAX8 pos	HALLMARK_MITOTIC_SPINDLE	G alpha (12/13) signalling events;NRAGE signals death through JNK;Rho GTPase cycle	WP_PATHOGENIC_ESCHERICHIA_COLI_INFECTION	-	-	-	+	2.79278	0.00519782	0.949677	4.27997	7.43062	0	Q92974	Q92974	ARHG2_HUMAN	Rho guanine nucleotide exchange factor 2	C (7)		2735	3195
SCAMP3	C1	-1.20041	-0.721883	-1.17559	-0.645554	-1.19626	-1.71059	0.350183	0.213046	-0.394656	0.0182998	0.0970963	0.330055	0.360618	1.05667	0.877864	0.40191	1.08411	2.2551	-	+	STIC_Epithelium PAX8 pos	HALLMARK_PROTEIN_SECRETION	-	-	-	-	-	+	1.86493	0.0272565	0.512392	2.9868	5.15404	2.12e-05	O14828	O14828	SCAM3_HUMAN	Secretory carrier-associated membrane protein 3	C (7)		2736	184
PYGO2	C1	-0.263529	-0.836529	-1.04232	-0.165804	-1.54123	-1.99654	-0.467101	-0.0324581	-0.407124	-0.248899	0.482167	-0.0256306	0.881171	0.821356	1.15422	0.639835	1.18064	1.86778	-	+	STIC_Epithelium PAX8 pos	-	Deactivation of the beta-catenin transactivating complex;Formation of the beta-catenin:TCF transactivating complex	WP_1Q211_COPY_NUMBER_VARIATION_SYNDROME	-	-	-	+	3.48295	0.00171901	0.50053	5.33863	4.64587	7.51e-05	Q9BRQ0	Q9BRQ0	PYGO2_HUMAN	Pygopus homolog 2	C (7)		2737	3608
YTHDF3	C1	-0.48478	-1.67096	-1.19223	-0.396117	-0.279864	-1.50763	-0.987502	0.335502	-0.193939	-0.204905	-0.156085	0.187927	0.881563	1.33052	1.81102	0.291944	1.56778	0.667772	-	+	STIC_Epithelium PAX8 pos	-	-	-	-	-	-	+	2.73164	0.00580952	0.319395	4.19098	4.27508	0.000481294	Q7Z739	Q7Z739	YTHD3_HUMAN	YTH domain-containing family protein 3	C (7)		2738	2640
PRRC2A	C1	-0.47678	-1.74505	-1.36042	-0.784095	0.021086	-1.30752	-0.00707317	-0.590401	-0.0876652	0.101761	-0.302924	-0.0918789	0.97618	2.1558	0.830364	0.584806	1.41739	0.666419	-	+	STIC_Epithelium PAX8 pos	-	-	-	-	-	-	+	3.16314	0.00291831	0.467857	4.83477	4.5644	0.000113497	P48634	P48634	PRC2A_HUMAN	Protein PRRC2A	C (7)		2739	1297
VPS45	C1	-0.271117	-1.84986	-1.44132	-0.465921	-0.539567	-0.855713	0.996657	0.0282635	-0.493073	0.157444	-0.18288	0.0260114	0.987289	0.846775	0.252499	-0.0552143	0.196382	2.66334	-	-	-	HALLMARK_PROTEIN_SECRETION	Factors involved in megakaryocyte development and platelet production;Intra-Golgi traffic	-	-	-	-	+	0.8546	0.211628	0.179343	1.60414	2.42953	0.00664595	Q9NRW7	Q9NRW7	VPS45_HUMAN	Vacuolar protein sorting-associated protein 45	C (7)		2740	4061
DUSP23	C1	-0.148986	-1.46904	-0.775803	-0.492906	-1.51462	-0.0714167	0.0584806	0.114524	0.00909732	-0.795935	0.224808	0.0427106	0.974124	-0.376735	0.416572	0.0508577	0.724113	3.03016	-	-	-	-	-	-	-	-	-	+	0.913951	0.186341	0.449453	1.68998	1.80246	0.00568655	Q9BVJ7	Q9BVJ7	DUS23_HUMAN	Dual specificity protein phosphatase 23	C (7)		2741	3683
MAD1L1	C1	-0.908605	-1.73343	-1.59749	-0.154173	-0.596324	-1.30061	-0.342564	0.454455	0.00615069	-0.0868013	0.508877	0.125373	1.26431	0.10614	0.585567	0.297043	1.35871	2.01336	-	-	-	-	Amplification of signal from unattached kinetochores via a MAD2 inhibitory signal;Mitotic Prometaphase;Resolution of Sister Chromatid Cohesion;RHO GTPases Activate Formins;Separation of Sister Chromatids	WP_CELL_CYCLE;WP_MALIGNANT_PLEURAL_MESOTHELIOMA;WP_REGULATION_OF_SISTER_CHROMATID_SEPARATION_AT_THE_METAPHASEANAPHASE_TRANSITION	-	-	-	+	1.52569	0.0526825	0.187309	2.53127	3.94907	0.00102603	Q9Y6D9	Q9Y6D9	MD1L1_HUMAN	Mitotic spindle assembly checkpoint protein MAD1	C (7)		2742	4641
ZC3H15	C1	-0.112856	-1.44676	-1.49615	-0.685058	-0.606566	-1.37223	-0.135288	0.18474	0.406364	0.18711	-0.28728	0.322833	1.33503	-0.55965	0.645527	0.10544	1.12656	2.38823	-	-	-	-	-	WP_VEGFAVEGFR2_SIGNALING	-	-	-	+	0.906629	0.188621	0.175866	1.67946	2.78239	0.00416924	Q8WU90	Q8WU90	ZC3HF_HUMAN	Zinc finger CCCH domain-containing protein 15	C (7)		2743	3062
THOC3	C1	-0.349288	-1.61074	-1.60218	-0.892895	-0.232333	-1.42829	-0.0280444	-0.899418	0.913136	0.216876	0.629533	0.427922	1.2401	0.273132	0.540613	0.122611	0.616356	2.06291	-	-	-	-	Cleavage of Growing Transcript in the Termination Region;mRNA 3'-end processing;Transport of Mature mRNA derived from an Intron-Containing Transcript	-	-	-	-	+	0.800889	0.236019	0.248211	1.52531	3.09562	0.000639699	Q96J01	Q96J01	THOC3_HUMAN	THO complex subunit 3	C (7)		2744	3383
HNRNPAB	C1	-0.491878	-1.2553	-1.46384	-0.593583	-0.777237	-0.837383	-0.607725	-0.108222	0.346033	-0.0871578	0.246445	0.0212788	1.41886	0.740534	0.850633	-0.854483	1.08026	2.37276	-	-	-	-	-	WP_MRNA_PROCESSING;WP_PREIMPLANTATION_EMBRYO	-	-	-	+	1.23424	0.0968135	0.517817	2.13717	2.95751	0.000516966	Q99729	Q99729	ROAA_HUMAN	Heterogeneous nuclear ribonucleoprotein A/B	C (7)		2745	3555
ADAR	C1	-0.776368	-1.18706	-1.5012	-0.875004	-0.940537	-0.851013	-0.42975	-0.0845098	0.242423	-0.107246	0.0319593	0.00860788	1.14134	0.790041	0.845187	0.215412	0.913617	2.5641	-	+	STIC_Epithelium PAX8 pos	HALLMARK_INTERFERON_ALPHA_RESPONSE;HALLMARK_INTERFERON_GAMMA_RESPONSE	C6 deamination of adenosine;Formation of editosomes by ADAR proteins;Interferon alpha/beta signaling	WP_CYTOSOLIC_DNASENSING_PATHWAY;WP_MEASLES_VIRUS_INFECTION;WP_PATHWAYS_OF_NUCLEIC_ACID_METABOLISM_AND_INNATE_IMMUNE_SENSING	-	-	-	+	2.16069	0.0153849	0.446916	3.38815	4.93227	5.09e-05	P55265	P55265	DSRAD_HUMAN	Double-stranded RNA-specific adenosine deaminase	C (7)		2746	1468
NR2C2AP	C1	-0.831729	-0.753086	-1.34317	-0.80725	-1.33676	-1.25771	0.34633	0.14606	0.545715	-0.308923	0.371359	0.346419	1.35497	0.570335	0.39759	-0.576053	0.685892	2.45001	-	-	-	-	Nuclear Receptor transcription pathway	-	-	-	-	+	0.668972	0.306675	0.209704	1.32608	3.39223	0.000551724	Q86WQ0	Q86WQ0	NR2CA_HUMAN	Nuclear receptor 2C2-associated protein	C (7)		2747	2684
BUD23	C1	-0.106774	-0.894013	-2.06967	0.010278	-0.27102	-1.40247	0.700021	-0.618913	0.186392	-0.467008	0.442817	-0.00668993	-0.564404	0.181742	0.501318	1.18618	0.748101	2.44412	-	-	-	-	Major pathway of rRNA processing in the nucleolus and cytosol;rRNA modification in the nucleus and cytosol	-	-	-	-	+	0.802162	0.235781	0.278167	1.52719	1.76588	0.00912243	O43709	O43709	BUD23_HUMAN	Probable 18S rRNA (guanine-N(7))-methyltransferase	C (7)		2748	304
GEMIN2	C1	0.00970661	-0.932094	-1.69926	0.0821106	-0.611392	-1.17961	0.0535867	-0.811144	0.148942	-0.482178	-0.127705	0.307535	-0.264959	1.52844	-0.0837899	0.867377	0.553845	2.6406	-	-	-	-	snRNP Assembly	-	-	-	-	+	1.25174	0.0932294	0.580973	2.16106	2.01515	0.00318294	O14893	O14893	GEMI2_HUMAN	Gem-associated protein 2	C (7)		2749	187
EIF2A	C1	-0.0614379	-0.739188	-1.24587	-1.09601	-1.13577	-1.41944	-0.517889	0.120422	0.641082	0.113011	-0.179317	0.0925917	-0.303607	0.73569	0.488866	1.4345	0.537558	2.53481	-	-	-	-	-	WP_7Q1123_COPY_NUMBER_VARIATION_SYNDROME;WP_PHOTODYNAMIC_THERAPYINDUCED_UNFOLDED_PROTEIN_RESPONSE;WP_VEGFAVEGFR2_SIGNALING	-	-	-	+	1.14404	0.116399	0.370262	2.01335	3.04889	0.000637736	Q9BY44	Q9BY44	EIF2A_HUMAN	Eukaryotic translation initiation factor 2A	C (7)		2750	3719
SLC1A5	C1	0.324721	-0.638841	-1.08729	-1.62682	-0.432799	-1.31382	-0.191871	0.412457	0.442402	-0.26543	0.150504	-0.157492	-1.05798	0.701143	0.247749	0.773605	1.14067	2.5791	-	-	-	HALLMARK_ADIPOGENESIS;HALLMARK_IL2_STAT5_SIGNALING;HALLMARK_MTORC1_SIGNALING;HALLMARK_XENOBIOTIC_METABOLISM	Amino acid transport across the plasma membrane	WP_AMINO_ACID_METABOLISM_IN_TRIPLENEGATIVE_BREAST_CANCER_CELLS;WP_FERROPTOSIS;WP_METABOLIC_REPROGRAMMING_IN_COLON_CANCER;WP_METABOLIC_REPROGRAMMING_IN_PANCREATIC_CANCER;WP_MRNA_PROTEIN_AND_METABOLITE_INDUCATION_PATHWAY_BY_CYCLOSPORIN_A;WP_TYROBP_CAUSAL_NETWORK_IN_MICROGLIA	+	FDA approved drug targets	19	+	0.67144	0.304905	0.689718	1.3299	1.73781	0.00330204	Q15758	Q15758	AAAT_HUMAN	Neutral amino acid transporter B(0)	C (7)		2751	2099
NOSIP	C1	-0.792659	-0.95887	-1.53875	-0.466061	-0.359491	-1.26181	-0.0130636	0.348373	0.408391	0.0708905	0.452456	0.086449	-0.916172	0.206821	-0.0286052	0.623586	1.43486	2.70365	-	-	-	-	NOSIP mediated eNOS trafficking	-	-	-	-	+	0.384182	0.522977	0.199386	0.854418	2.00851	0.00458062	Q9Y314	Q9Y314	NOSIP_HUMAN	Nitric oxide synthase-interacting protein	C (7)		2752	4524
HMCES	C1	-0.488375	-1.14682	-1.2675	0.31113	-0.326818	-1.3365	-0.65737	-0.138866	0.42875	-0.185798	0.709873	-0.085361	-0.764515	-0.35742	0.538752	0.516999	1.69561	2.55422	-	-	-	-	-	-	-	-	-	+	0.624115	0.333408	0.272442	1.25613	1.39883	0.0197471	Q96FZ2	Q96FZ2	HMCES_HUMAN	Abasic site processing protein HMCES	C (7)		2753	3335
DCAF13	C1	0.347668	-0.276877	-1.33214	-1.163	-2.55497	-1.54906	0.106131	0.465838	0.762357	0.339755	0.49156	0.496473	0.927196	0.934721	-0.0896862	0.403154	0.820074	0.870812	-	-	-	-	Major pathway of rRNA processing in the nucleolus and cytosol;Neddylation;rRNA modification in the nucleus and cytosol	-	-	-	-	+	0.502988	0.418741	0.219723	1.06004	3.27273	0.000112462	Q9NV06	Q9NV06	DCA13_HUMAN	DDB1- and CUL4-associated factor 13	C (7)		2754	4105
WDR12	C1	0.218075	-0.146683	-1.52024	-1.58353	-2.15371	-1.61399	0.156012	0.407435	0.72542	0.384857	0.472321	0.488361	0.549765	1.11066	0.055171	0.791037	0.858724	0.800314	-	-	-	-	Major pathway of rRNA processing in the nucleolus and cytosol	-	-	-	-	+	0.813353	0.230265	0.273577	1.54371	3.8307	4.37e-05	Q9GZL7	Q9GZL7	WDR12_HUMAN	Ribosome biogenesis protein WDR12	C (7)		2755	3764
PDIA6	C1	0.245063	-0.940879	-1.37182	-0.973708	-1.86412	-1.62363	0.898886	0.0942233	0.182092	0.182373	0.238899	-0.424986	1.32101	1.01721	-0.0188616	0.747141	1.0237	1.2674	-	+	STIC_Epithelium PAX8 pos	HALLMARK_UNFOLDED_PROTEIN_RESPONSE	Post-translational protein phosphorylation;Regulation of Insulin-like Growth Factor (IGF) transport and uptake by Insulin-like Growth Factor Binding Proteins (IGFBPs);XBP1(S) activates chaperone genes	WP_PHOTODYNAMIC_THERAPYINDUCED_UNFOLDED_PROTEIN_RESPONSE;WP_VEGFAVEGFR2_SIGNALING	-	-	-	+	1.60405	0.0457048	0.251519	2.63644	4.06357	0.000216418	Q15084	Q15084	PDIA6_HUMAN	Protein disulfide-isomerase A6	C (7)		2756	2035
RYBP	C1	0.650355	-1.89512	-0.519946	-1.38319	-1.87312	-1.72145	0.311657	0.832554	0.463558	0.182552	0.755958	0.348693	0.686688	0.333418	0.65532	0.781268	0.761518	0.629294	-	-	-	-	RUNX1 interacts with co-factors whose precise effect on RUNX1 targets is not known;Transcriptional Regulation by E2F6	-	-	-	-	+	0.635386	0.326771	0.111437	1.27383	3.64081	0.000111715	Q8N488	Q8N488	RYBP_HUMAN	RING1 and YY1-binding protein	C (7)		2757	2852
ZMYM4	C1	0.0715233	-1.22633	-0.524943	-1.50724	-2.70181	-1.0888	0.303888	0.491466	0.635091	0.410331	0.637022	0.427031	0.663592	0.526739	0.594992	0.962771	0.872725	0.451947	-	-	-	-	-	-	-	-	-	+	1.12601	0.12103	0.216121	1.98843	4.17752	2.88e-05	Q5VZL5	Q5VZL5	ZMYM4_HUMAN	Zinc finger MYM-type protein 4	C (7)		2758	2385
EIF2AK3	C1	1.90137	-1.1222	-1.38595	-1.15773	-2.20183	-0.773405	0.463987	0.335475	0.150271	0.164171	-0.0797144	0.288292	0.280014	-0.0676906	0.927946	1.1074	0.364747	0.804848	-	-	-	HALLMARK_UNFOLDED_PROTEIN_RESPONSE	PERK regulates gene expression	WP_7Q1123_COPY_NUMBER_VARIATION_SYNDROME;WP_ALZHEIMERS_DISEASE;WP_ALZHEIMERS_DISEASE_AND_MIRNA_EFFECTS;WP_ENDOPLASMIC_RETICULUM_STRESS_RESPONSE_IN_CORONAVIRUS_INFECTION;WP_MEASLES_VIRUS_INFECTION;WP_NONALCOHOLIC_FATTY_LIVER_DISEASE;WP_PHOTODYNAMIC_THERAPYINDUCED_UNFOLDED_PROTEIN_RESPONSE;WP_TRANSLATION_FACTORS;WP_UNFOLDED_PROTEIN_RESPONSE;WP_VEGFAVEGFR2_SIGNALING	-	-	-	+	0.963079	0.168412	0.275973	1.76017	1.41259	0.00942386	Q9NZJ5	Q9NZJ5	E2AK3_HUMAN	Eukaryotic translation initiation factor 2-alpha kinase 3	C (7)		2759	4197
CCAR1	C1	-0.161539	-1.29019	-2.79419	-0.357572	-0.568642	-0.819231	-0.241729	0.61581	0.981572	0.516595	0.323339	0.705295	0.846713	0.409249	-0.177641	1.14244	-0.434085	1.3038	-	-	-	-	mRNA Splicing - Major Pathway	-	-	-	-	+	0.0329625	0.952545	0.00589387	0.0940723	2.44588	0.0126928	Q8IX12	Q8IX12	CCAR1_HUMAN	Cell division cycle and apoptosis regulator protein 1	C (7)		2760	2758
NUP62	C1	0.0753035	-1.08972	-2.05569	-0.24677	-0.60223	-1.75362	-1.33995	0.734111	0.849534	0.45175	0.197459	0.932845	0.494258	0.225047	0.578027	1.09078	0.0118652	1.447	-	-	-	-	ISG15 antiviral mechanism;NEP/NS2 Interacts with the Cellular Export Machinery;NS1 Mediated Effects on Host Pathways;Nuclear import of Rev protein;Nuclear Pore Complex (NPC) Disassembly;Regulation of Glucokinase by Glucokinase Regulatory Protein;Regulation of HSF1-mediated heat shock response;Rev-mediated nuclear export of HIV RNA;snRNP Assembly;SUMOylation of chromatin organization proteins;SUMO…	WP_7Q1123_COPY_NUMBER_VARIATION_SYNDROME	-	-	-	+	0.365332	0.541591	0.0680432	0.820254	2.21411	0.0145739	P37198	P37198	NUP62_HUMAN	Nuclear pore glycoprotein p62	C (7)		2761	1186
SNRPE	C1	0.205417	-1.1373	-2.17876	-0.699436	-1.24033	0.128143	-0.270799	1.12691	1.12684	-0.468018	-0.405179	0.369772	0.623781	0.337654	-0.00641217	1.36403	-0.609756	1.73344	-	-	-	-	Cleavage of Growing Transcript in the Termination Region;mRNA Splicing - Major Pathway;mRNA Splicing - Minor Pathway;SLBP Dependent Processing of Replication-Dependent Histone Pre-mRNAs;SLBP independent Processing of Histone Pre-mRNAs;snRNP Assembly	WP_MRNA_PROCESSING	-	-	-	+	0.301732	0.608762	0.0710799	0.701163	1.53193	0.0380148	P62304	P62304	RUXE_HUMAN	Small nuclear ribonucleoprotein E	C (7)		2762	1566
POLR1E	C1	-1.44804	-1.78206	-1.01131	-1.5028	-1.0948	-1.13611	0.671951	0.56508	0.669835	0.569245	0.762193	0.888813	0.608722	0.755191	0.0809325	0.676546	0.592416	1.13419	-	-	-	-	B-WICH complex positively regulates rRNA expression;NoRC negatively regulates rRNA expression;RNA Polymerase I Chain Elongation;RNA Polymerase I Promoter Escape;RNA Polymerase I Transcription Initiation;RNA Polymerase I Transcription Termination	WP_2Q13_COPY_NUMBER_VARIATION_SYNDROME;WP_EUKARYOTIC_TRANSCRIPTION_INITIATION;WP_PYRIMIDINE_METABOLISM	-	-	-	+	0.120034	0.830678	-0.0562657	-0.315974	8.93909	0	Q9GZS1	Q9GZS1	RPA49_HUMAN	DNA-directed RNA polymerase I subunit RPA49	C (7)		2763	3773
UTP25	C1	-1.19373	-1.36357	-1.46625	-1.45118	-1.1696	-1.52277	0.523351	0.729347	0.76159	0.570107	0.709446	0.668973	0.618419	0.758171	0.414582	0.681318	0.769829	0.961966	-	-	-	-	Major pathway of rRNA processing in the nucleolus and cytosol;rRNA modification in the nucleus and cytosol	-	-	-	-	+	0.193371	0.735163	0.0690268	0.481298	12.9422	0	Q68CQ4	Q68CQ4	UTP25_HUMAN	U3 small nucleolar RNA-associated protein 25 homolog	C (7)		2764	2403
POLR1G	C1	-0.827596	-1.75578	-1.54089	-1.03704	-1.31221	-1.12097	0.4754	0.680869	0.803495	0.597117	0.525923	0.880462	0.834629	0.183171	-0.353316	1.10639	0.575966	1.28439	-	-	-	-	B-WICH complex positively regulates rRNA expression;NoRC negatively regulates rRNA expression;RNA Polymerase I Chain Elongation;RNA Polymerase I Promoter Escape;RNA Polymerase I Transcription Initiation;RNA Polymerase I Transcription Termination	-	-	-	-	+	0.0787668	0.887169	-0.0406137	-0.214947	6.15169	0	O15446	O15446	RPA34_HUMAN	DNA-directed RNA polymerase I subunit RPA34	C (7)		2765	244
ZCCHC17	C1	-0.863423	-1.94663	-1.44363	-1.18324	-1.39202	-0.975948	0.338542	0.499444	0.761802	0.351661	0.711389	0.601647	0.798771	0.670983	0.226352	1.07028	1.2718	0.502225	-	-	-	-	-	-	-	-	-	+	0.615469	0.338927	0.226039	1.2425	7.62651	0	Q9NP64	Q9NP64	ZCC17_HUMAN	Zinc finger CCHC domain-containing protein 17	C (7)		2766	3993
CENPA	C1	-0.354165	-1.73371	-0.933895	-1.23792	-1.88167	-1.38828	0.555805	0.269857	0.295274	0.474225	0.314296	0.675232	0.668661	0.631468	0.504357	1.52849	0.883335	0.728631	-	-	-	HALLMARK_G2M_CHECKPOINT;HALLMARK_GLYCOLYSIS	Amplification of signal from unattached kinetochores via a MAD2 inhibitory signal;Deposition of new CENPA-containing nucleosomes at the centromere;Mitotic Prometaphase;Resolution of Sister Chromatid Cohesion;RHO GTPases Activate Formins;Separation of Sister Chromatids	WP_2Q37_COPY_NUMBER_VARIATION_SYNDROME	-	-	-	+	1.42653	0.0643165	0.47727	2.39787	6.42886	0	P49450	P49450	CENPA_HUMAN	Histone H3-like centromeric protein A	C (7)		2767	1320
ISG20L2	C1	-1.78887	-0.984781	-0.911884	-0.961692	-1.89278	-1.17643	-0.0411216	0.370836	1.21871	0.806336	0.816857	0.492142	0.725261	0.400788	0.538343	0.62919	0.837755	0.921344	-	-	-	HALLMARK_ESTROGEN_RESPONSE_EARLY	Major pathway of rRNA processing in the nucleolus and cytosol	-	-	-	-	+	0.127515	0.820822	0.0566994	0.33361	6.80936	0	Q9H9L3	Q9H9L3	I20L2_HUMAN	Interferon-stimulated 20 kDa exonuclease-like 2	C (7)		2768	3930
KIRREL1	C1	-1.58138	-0.703361	-1.48165	-1.70828	-1.71768	-0.671163	0.395088	0.652803	0.779498	0.696824	0.72396	0.865027	0.72929	0.42651	0.439308	0.477532	0.829265	0.848417	-	-	-	-	Antigen activates B Cell Receptor (BCR) leading to generation of second messengers;CD28 dependent Vav1 pathway;NCAM signaling for neurite out-growth;Nephrin family interactions;Reelin signalling pathway	-	-	-	-	+	0.240511	0.677466	-0.0765055	-0.579978	7.84257	0	Q96J84	Q96J84	KIRR1_HUMAN	Kin of IRRE-like protein 1	C (7)		2769	3384
REXO4	C1	-1.85279	-1.49256	-1.46608	-1.34234	-1.51907	0.182598	0.413712	0.635465	0.545971	0.489256	0.572823	0.431332	0.861141	0.974441	0.469162	0.852634	0.557758	0.686548	-	-	-	-	-	-	-	-	-	+	1.50921	0.0545272	0.215284	2.50912	5.83954	0	Q9GZR2	Q9GZR2	REXO4_HUMAN	RNA exonuclease 4	C (7)		2770	3770
NSA2	C1	-1.6767	-1.92575	-1.22946	-1.07614	-1.35359	-0.518609	0.258747	0.691878	0.743594	0.397942	0.528555	0.661209	0.828533	0.964281	0.35654	1.08566	0.72048	0.542836	-	-	-	-	-	-	-	-	-	+	0.789704	0.241182	0.207702	1.50874	7.41748	0	O95478	O95478	NSA2_HUMAN	Ribosome biogenesis protein NSA2 homolog	C (7)		2771	555
NOL11	C1	-0.728227	-2.13061	-2.20428	-1.10183	-0.970959	-0.0359317	0.293454	0.680808	0.628807	0.974411	0.304769	0.443957	0.898378	0.890998	0.34136	0.498941	0.715422	0.500531	-	-	-	-	Major pathway of rRNA processing in the nucleolus and cytosol;rRNA modification in the nucleus and cytosol	-	-	-	-	+	0.255271	0.660931	0.08381	0.609861	4.61766	5.77e-06	Q9H8H0	Q9H8H0	NOL11_HUMAN	Nucleolar protein 11	C (7)		2772	3912
DDX55	C1	-1.94128	-1.05547	-1.24498	-0.273655	-2.16965	0.15254	0.34772	1.13884	0.529707	0.122566	0.139498	0.140623	-0.229048	0.802825	0.94998	1.04674	0.522948	1.0201	-	-	-	-	-	-	-	-	-	+	0.528995	0.39919	0.191959	1.10314	3.3425	0.000159257	Q8NHQ9	Q8NHQ9	DDX55_HUMAN	ATP-dependent RNA helicase DDX55	C (7)		2773	2978
CDKAL1	C1	-1.84776	-1.6096	-0.980646	0.230529	-2.2585	0.10504	0.31161	0.0682485	0.224151	0.252443	0.386792	0.228476	0.991422	0.23944	0.791302	0.847138	1.12537	0.894551	-	+	STIC_Epithelium PAX8 pos	HALLMARK_KRAS_SIGNALING_DN	tRNA modification in the nucleus and cytosol	WP_VITAMIN_D_RECEPTOR_PATHWAY	-	-	-	+	2.81541	0.00486891	0.633477	4.31308	3.44074	8.57e-05	Q5VV42	Q5VV42	CDKAL_HUMAN	Threonylcarbamoyladenosine tRNA methylthiotransferase	C (7)		2774	2372
PPP1R14B	C1	-0.483786	-0.910948	-1.54235	-1.42023	-2.17529	-0.613921	0.302947	-0.183343	0.764517	0.445369	0.861517	0.804107	1.56848	0.769526	0.0841602	0.673237	0.348814	0.707192	-	-	-	-	-	WP_ENDOPLASMIC_RETICULUM_STRESS_RESPONSE_IN_CORONAVIRUS_INFECTION	-	-	-	+	0.319319	0.59008	0.185336	0.734727	4.61633	5.72e-06	Q96C90	Q96C90	PP14B_HUMAN	Protein phosphatase 1 regulatory subunit 14B	C (7)		2775	3274
TMEM201	C1	-0.13638	-1.03988	-1.19023	-0.829807	-2.76037	-0.391929	-0.388431	0.579499	1.15329	0.469835	0.705855	0.989831	0.636752	0.178806	-0.30891	1.09536	0.684108	0.552608	-	-	-	-	-	-	-	-	-	+	0.146765	0.795064	-0.0441833	-0.378128	2.94349	0.000943118	Q5SNT2	Q5SNT2	TM201_HUMAN	Transmembrane protein 201	C (7)		2776	2296
CDYL	C1	0.233305	-1.42128	-1.51307	-1.38338	-2.38594	0.237123	0.018807	0.327242	0.120186	0.412611	0.216801	0.263262	0.815763	0.414735	1.08002	0.975	1.21172	0.377108	-	+	STIC_Epithelium PAX8 pos	-	-	WP_ENDODERM_DIFFERENTIATION	-	-	-	+	2.47179	0.00923722	0.508355	3.81983	3.25573	0.000134642	Q9Y232	Q9Y232	CDYL_HUMAN	Chromodomain Y-like protein	C (7)		2777	4471
MEPCE	C1	-0.701259	-0.542017	-2.18515	-1.47476	-1.35752	-0.548119	0.206748	-0.112075	0.264384	0.246278	0.0437057	0.266402	0.971601	0.799464	0.152529	1.3687	1.30541	1.29568	-	+	STIC_Epithelium PAX8 pos	-	-	WP_IL18_SIGNALING_PATHWAY	-	-	-	+	2.7105	0.00612313	0.358685	4.16037	5.29541	3.13e-05	Q7L2J0	Q7L2J0	MEPCE_HUMAN	7SK snRNA methylphosphate capping enzyme	C (7)		2778	2588
CASP2	C1	-0.264511	-0.717197	-1.29325	-1.89184	-1.97936	-0.6555	0.181428	-0.0731533	0.146944	0.306463	0.261836	0.166981	0.485029	0.412364	0.978556	1.20075	1.26001	1.47445	-	+	STIC_Epithelium PAX8 pos	HALLMARK_APOPTOSIS	NADE modulates death signalling;NOD1/2 Signaling Pathway;TP53 Regulates Transcription of Caspase Activators and Caspases	WP_ACUTE_VIRAL_MYOCARDITIS;WP_APOPTOSIS;WP_APOPTOSIS_MODULATION_AND_SIGNALING;WP_APOPTOSIS_MODULATION_BY_HSP70;WP_ATM_SIGNALING_PATHWAY;WP_PARKINSONS_DISEASE_PATHWAY;WP_UNFOLDED_PROTEIN_RESPONSE	-	-	-	+	2.83865	0.00486424	0.378108	4.34719	5.14993	3.18e-05	P42575	P42575	CASP2_HUMAN	Caspase-2	C (7)		2779	1234
HK2	C1	-0.0162838	-0.961627	-1.38809	-1.33435	-2.10062	-0.387777	0.114645	-0.193236	0.145523	-0.0169141	0.0285408	-0.0919699	0.89855	1.91107	0.330778	1.15656	0.984028	0.921174	-	+	STIC_Epithelium PAX8 pos	HALLMARK_GLYCOLYSIS;HALLMARK_HYPOXIA;HALLMARK_IL2_STAT5_SIGNALING;HALLMARK_MTORC1_SIGNALING;HALLMARK_MYC_TARGETS_V2	Glycolysis	WP_CLEAR_CELL_RENAL_CELL_CARCINOMA_PATHWAYS;WP_GLYCOGEN_SYNTHESIS_AND_DEGRADATION;WP_GLYCOLYSIS_AND_GLUCONEOGENESIS;WP_METABOLIC_REPROGRAMMING_IN_PANCREATIC_CANCER	-	-	-	+	3.14472	0.00292683	1.09257	4.80649	4.54982	5.79e-06	P52789	P52789	HXK2_HUMAN	Hexokinase-2	C (7)		2780	1414
PRKDC	C1	-0.626357	-1.16713	-1.90712	-0.991604	-1.16594	-1.15136	-0.23135	0.0781232	0.404083	0.0301278	0.169324	0.151219	1.0344	0.880697	0.746874	1.83202	1.1484	0.765594	-	+	STIC_Epithelium PAX8 pos	HALLMARK_E2F_TARGETS	Cytosolic sensors of pathogen-associated DNA;E3 ubiquitin ligases ubiquitinate target proteins;IRF3-mediated induction of type I IFN;Nonhomologous End-Joining (NHEJ)	WP_ATM_SIGNALING_IN_DEVELOPMENT_AND_DISEASE;WP_CELL_CYCLE;WP_CIRCADIAN_RHYTHM_GENES;WP_DNA_DAMAGE_RESPONSE;WP_DNA_IRDAMAGE_AND_CELLULAR_RESPONSE_VIA_ATR;WP_DNA_IRDOUBLE_STRAND_BREAKS_AND_CELLULAR_RESPONSE_VIA_ATM;WP_DNA_REPAIR_PATHWAYS_FULL_NETWORK;WP_FAS_LIGAND_PATHWAY_AND_STRESS_INDUCTION_OF_HEAT_SHOCK_PROTEINS;WP_MIRNA_REGULATION_OF_DNA_DAMAGE_RESPONSE;WP_NONHOMOLOGOUS_END_JOINING;WP_OSTEOBLAS…	-	-	-	+	3.40128	0.00206792	0.395775	5.20757	7.12556	0	P78527	P78527	PRKDC_HUMAN	DNA-dependent protein kinase catalytic subunit	C (7)		2781	1639
RNMT	C1	-1.03927	-1.15533	-1.33284	-1.34477	-0.860459	-1.18434	-0.211152	0.236171	0.00337189	-0.054078	0.268055	0.179933	0.617685	0.995036	0.712542	2.09399	1.37814	0.697316	-	+	STIC_Epithelium PAX8 pos	HALLMARK_DNA_REPAIR	mRNA Capping;RNA Pol II CTD phosphorylation and interaction with CE;RNA Pol II CTD phosphorylation and interaction with CE during HIV infection	WP_MRNA_PROCESSING	-	-	-	+	2.69288	0.00635065	0.426042	4.1349	7.02668	0	O43148	O43148	MCES_HUMAN	mRNA cap guanine-N7 methyltransferase	C (7)		2782	252
SYNCRIP	C1	-0.606486	-1.40133	-1.32064	-0.851403	-1.3513	-1.45472	-0.448672	-0.0969636	0.325542	0.411309	0.426677	0.260766	0.75781	0.721759	1.09518	1.61427	1.58403	0.334158	-	+	STIC_Epithelium PAX8 pos	HALLMARK_E2F_TARGETS;HALLMARK_G2M_CHECKPOINT;HALLMARK_MYC_TARGETS_V1	-	-	-	-	-	+	2.20695	0.0142955	0.431951	3.45161	6.21628	0	O60506	O60506	HNRPQ_HUMAN	Heterogeneous nuclear ribonucleoprotein Q	C (7)		2783	351
NASP	C1	-0.769678	-0.834296	-1.51013	-0.884175	-1.0747	-1.37372	-0.668249	-0.0117138	0.976314	0.0434364	-0.43449	-0.0209623	0.683877	1.30997	0.895729	1.72009	1.26352	0.689183	-	+	STIC_Epithelium PAX8 pos	HALLMARK_E2F_TARGETS;HALLMARK_G2M_CHECKPOINT;HALLMARK_GLYCOLYSIS	-	-	-	-	-	+	2.53752	0.00823562	0.580164	3.9127	5.76751	0	P49321	P49321	NASP_HUMAN	Nuclear autoantigenic sperm protein	C (7)		2784	1312
DCUN1D5	C1	-0.0772353	-1.16193	-1.60911	-0.619221	-0.458796	-1.38804	-1.06249	0.0138449	0.172205	-0.330418	0.0933415	-0.0919189	0.921817	1.12259	0.41978	1.51858	2.11662	0.420382	-	+	STIC_Epithelium PAX8 pos	-	Neddylation	-	-	-	-	+	2.55515	0.008	0.63453	3.93771	4.00816	0.000112121	Q9BTE7	Q92564;Q9BTE7	DCNL5_HUMAN	DCN1-like protein 5	C (7)		2785	3644
RCC2	C1	-0.924553	-1.1647	-1.58133	-0.81603	-1.44781	-1.57262	-0.198847	0.163548	0.652645	0.397733	0.39405	0.448074	0.525698	1.31971	0.650713	1.00316	1.45356	0.696999	-	+	STIC_Epithelium PAX8 pos	-	Amplification of signal from unattached kinetochores via a MAD2 inhibitory signal;Mitotic Prometaphase;Resolution of Sister Chromatid Cohesion;RHO GTPases Activate Formins;Separation of Sister Chromatids	-	-	-	-	+	2.03555	0.019443	0.612155	3.2175	7.47634	0	Q9P258	Q9P258	RCC2_HUMAN	Protein RCC2	C (7)		2786	4234
ADNP	C1	-0.990289	-1.45995	-1.61028	-0.759602	-1.31823	-1.34331	-0.10369	0.172154	0.511724	0.345599	0.609454	0.495969	0.304771	1.19132	0.295186	1.08202	1.43972	1.13744	-	-	-	-	-	-	-	-	-	+	1.5157	0.0538206	0.22777	2.51784	6.91904	0	Q9H2P0	Q9H2P0	ADNP_HUMAN	Activity-dependent neuroprotector homeobox protein	C (7)		2787	3832
CNBP	C1	-1.00151	-1.17559	-1.83391	-1.10242	-1.02903	-1.04301	-0.19213	0.233416	0.584937	0.0743015	0.127955	0.286781	0.649201	1.18118	0.361069	1.106	1.79724	0.975521	-	+	STIC_Epithelium PAX8 pos	HALLMARK_MYC_TARGETS_V1;HALLMARK_PEROXISOME	-	-	-	-	-	+	2.34585	0.0112	0.602504	3.64362	6.8961	0	P62633	P62633	CNBP_HUMAN	CCHC-type zinc finger nucleic acid binding protein	C (7)		2788	1577
RPL7L1	C1	-0.962627	-1.34814	-1.73278	-1.10843	-0.696948	-1.49582	-0.0792102	-0.0596586	1.00228	0.376172	0.692788	0.495143	1.08414	1.03664	-0.0831934	1.00776	1.38094	0.490944	-	-	-	-	-	-	-	-	-	+	0.785193	0.243251	0.235657	1.50205	5.65306	0	Q6DKI1	Q6DKI1	RL7L_HUMAN	Ribosomal protein uL30-like	C (7)		2789	2417
PUM1	C1	-0.743831	-1.73537	-1.86456	-0.544703	-0.628704	-1.33846	0.20055	0.019302	0.166876	0.1836	0.605914	0.245859	0.472988	1.46924	0.697157	0.840725	1.83178	0.121638	-	-	-	-	Golgi Associated Vesicle Biogenesis	-	-	-	-	+	1.47198	0.0589551	0.252116	2.45906	4.78777	8.35e-05	Q14671	Q8TB72;Q14671	PUM1_HUMAN	Pumilio homolog 1	C (7)		2790	1986
MTHFD1L	C1	-0.851783	-0.437447	-1.17202	-0.803651	-1.15935	-0.942626	-0.448313	0.0943497	-0.123306	-0.16931	-0.230669	-0.189006	1.40918	2.46074	0.176018	0.837469	1.64495	-0.0952249	-	+	STIC_Epithelium PAX8 pos	-	Metabolism of folate and pterines	WP_ONECARBON_METABOLISM;WP_TRANSSULFURATION_ONECARBON_METABOLISM_AND_RELATED_PATHWAYS	-	-	-	+	1.98071	0.0217124	0.953938	3.14314	3.91367	5.05e-05	Q6UB35	Q6UB35	C1TM_HUMAN	Monofunctional C1-tetrahydrofolate synthase, mitochondrial	C (7)		2791	2512
EEF1G	C1	-0.383603	-1.031	-1.19091	-0.981646	-1.25254	-0.915958	-0.625857	-0.0202448	0.0595595	-0.00353395	-0.0348281	0.0574635	0.994496	1.98421	0.52252	0.904837	2.12996	-0.212922	-	+	STIC_Epithelium PAX8 pos	-	Eukaryotic Translation Elongation	WP_TRANSLATION_FACTORS	-	-	-	+	1.90399	0.0253426	0.346967	3.03946	4.14533	0.000292628	P26641	P26641	EF1G_HUMAN	Elongation factor 1-gamma	C (7)		2792	1037
KDM2A	C1	-0.745996	-1.03246	-1.23428	-1.58952	-0.28522	-0.873366	-0.135406	-0.342446	0.0621355	-0.0595603	0.0411458	0.123485	1.38556	1.75465	-0.237487	1.00914	2.05912	0.10049	-	+	STIC_Epithelium PAX8 pos	-	HDMs demethylate histones	-	-	-	-	+	1.72741	0.0360532	0.458402	2.80193	3.79084	0.00020038	Q9Y2K7	Q9Y2K7	KDM2A_HUMAN	Lysine-specific demethylase 2A	C (7)		2793	4497
NAA20	C1	-0.190796	0.0731914	-2.45183	-1.14285	-1.16316	-0.44734	-0.5663	0.517846	-0.586051	0.350865	0.544509	0.402673	0.0389884	1.12813	-0.104679	1.94592	1.08913	0.561739	-	-	-	-	-	WP_METAPATHWAY_BIOTRANSFORMATION_PHASE_I_AND_II	-	-	-	+	0.948675	0.173912	0.23207	1.73967	2.22473	0.00460836	P61599	P61599	NAA20_HUMAN	N-alpha-acetyltransferase 20	C (7)		2794	1539
HIRA	C1	0.616101	0.178651	-2.50016	-0.783228	-1.28053	-0.69562	0.276491	0.565513	-0.414561	0.345436	-0.0622606	0.151184	0.692483	1.11465	-0.978167	1.5344	1.35634	-0.116726	-	-	-	HALLMARK_G2M_CHECKPOINT	Formation of Senescence-Associated Heterochromatin Foci (SAHF)	WP_16P112_PROXIMAL_DELETION_SYNDROME;WP_22Q112_COPY_NUMBER_VARIATION_SYNDROME	-	-	-	+	0.518362	0.407119	0.171589	1.08559	1.30436	0.0262284	P54198	P54198	HIRA_HUMAN	Protein HIRA	C (7)		2795	1438
LYAR	C1	-0.658321	-0.789357	-0.989273	-0.860377	-1.22593	-1.37609	-0.402947	0.0573497	0.398876	-0.0591949	0.215905	-0.0359006	0.619804	1.08645	0.62934	2.76626	0.879521	-0.256111	Unclassified_3	-	-	HALLMARK_E2F_TARGETS	-	-	-	-	-	+	1.27213	0.0892055	0.590514	2.18884	3.54137	0.00013419	Q9NX58	Q9NX58	LYAR_HUMAN	Cell growth-regulating nucleolar protein	C (7)		2796	4152
SART3	C1	-0.555044	-0.952731	-1.90895	-1.14863	-0.914791	-1.10116	0.333917	-0.13644	0.590292	0.263242	0.469167	0.208688	0.600169	0.913288	1.05212	2.23485	0.601633	-0.549621	-	-	-	-	-	-	-	-	-	+	0.695795	0.290041	0.158734	1.36733	3.76052	0.000517413	Q15020	Q15020	SART3_HUMAN	Squamous cell carcinoma antigen recognized by T-cells 3	C (7)		2797	2019
OXSR1	C1	-0.91081	-0.743487	-1.06438	-0.665551	-1.36093	-1.30292	0.60668	0.345298	0.362958	0.361149	0.570382	0.418121	0.245634	0.773615	0.143949	2.70883	0.499306	-0.987838	-	-	-	HALLMARK_REACTIVE_OXIGEN_SPECIES_PATHWAY	-	-	-	-	-	+	0.0892448	0.872365	0.0704902	0.241238	2.53261	0.000984907	O95747	O95747	OXSR1_HUMAN	Serine/threonine-protein kinase OSR1	C (7)		2798	570
GTF3C2	C1	-1.05011	-0.255423	-1.67323	-0.696105	-1.62433	-1.68376	0.227279	0.29773	0.422401	0.242182	-0.0341263	0.409598	0.805859	0.639676	0.686749	2.05399	0.71666	0.514972	-	+	STIC_Epithelium PAX8 pos	-	RNA Polymerase III Abortive And Retractive Initiation;RNA Polymerase III Transcription Initiation From Type 1 Promoter;RNA Polymerase III Transcription Initiation From Type 2 Promoter	-	-	-	-	+	1.60738	0.0453675	0.197693	2.6409	5.0811	0.000112062	Q8WUA4	Q8WUA4	TF3C2_HUMAN	General transcription factor 3C polypeptide 2	C (7)		2799	3063
ENO1	C1	-1.45028	-0.413567	-1.48708	-1.1975	-0.853657	-1.95561	0.404127	0.21133	0.472455	0.140494	0.541902	0.419838	0.692073	1.27686	0.356861	1.58749	0.804373	0.449901	Unclassified_3	-	-	-	-	-	-	-	-	+	1.43196	0.0637623	0.377071	2.40519	5.96035	0	Cont_Q9XSJ4	Cont_Q9XSJ4	ENOA_BOVIN	Alpha-enolase	C (7)		2800	92
YEATS2	C1	-0.354986	0.122115	-1.52701	-1.13407	-1.44914	-2.06246	0.00886841	0.303762	0.923106	0.523704	1.09765	0.855342	-0.256618	0.763378	0.254799	1.39308	0.952287	-0.413819	-	-	-	-	HATs acetylate histones	-	-	-	-	+	0.20494	0.720389	-0.0838431	-0.506004	3.05442	0.000502765	Q9ULM3	Q9ULM3	YETS2_HUMAN	YEATS domain-containing protein 2	C (7)		2801	4403
RSF1	C1	-0.1566	-1.28342	-1.15993	-1.33595	-0.661174	-2.1387	0.0613722	0.936686	0.720254	0.286265	0.611214	0.555571	0.376901	0.270666	0.825953	1.16944	1.54081	-0.619354	-	-	-	-	Deposition of new CENPA-containing nucleosomes at the centromere	-	-	-	-	+	0.070858	0.897103	0.0180464	0.19479	3.59121	0.00086496	Q96T23	Q96T23	RSF1_HUMAN	Remodeling and spacing factor 1	C (7)		2802	3513
CLNS1A	C1	-0.271236	-1.48585	-2.13985	-1.20106	-0.830245	-0.946829	0.323688	-0.0900682	0.766688	0.515616	1.03536	0.475535	0.708281	1.72993	-0.304712	0.952328	0.557286	0.205124	-	-	-	HALLMARK_MYC_TARGETS_V1	snRNP Assembly	-	-	-	-	+	0.167491	0.767967	0.0753344	0.424768	3.90429	0.000111541	P54105	P54105	ICLN_HUMAN	Methylosome subunit pICln	C (7)		2803	1435
SRP14	C1	-0.361465	-1.32061	-2.02255	-1.39184	-0.516898	-0.81126	0.880479	0.468117	1.16266	0.0270315	0.577626	0.50758	-0.0618813	1.99121	-0.103119	1.11403	-0.0257641	-0.11334	-	-	-	HALLMARK_PANCREAS_BETA_CELLS	Neutrophil degranulation;SRP-dependent cotranslational protein targeting to membrane	-	-	-	-	+	0.133319	0.813126	-0.0473049	-0.347161	3.06961	0.00103445	P37108	P37108	SRP14_HUMAN	Signal recognition particle 14 kDa protein	C (7)		2804	1185
PTRHD1	C1	-0.692627	-1.45228	-1.69113	-0.95823	-1.15502	-1.29995	0.774313	0.624025	1.07065	0.51639	0.52608	0.276472	0.604737	1.43793	-0.289565	1.40114	0.557515	-0.250467	-	-	-	-	-	-	-	-	-	+	0.0598048	0.913005	-0.0241261	-0.166143	4.83465	4.62e-05	Q6GMV3	Q6GMV3	PTRD1_HUMAN	Putative peptidyl-tRNA hydrolase PTRHD1	C (7)		2805	2426
RPL22	C1	-0.49638	-0.987887	-1.97671	-1.52003	-1.10791	-1.35291	0.929412	0.315094	1.07767	0.890627	0.492544	0.780146	0.413285	0.910326	0.057569	1.27705	0.314813	-0.0167054	Secretory_1	-	-	HALLMARK_MYC_TARGETS_V1	Eukaryotic Translation Termination;Formation of a pool of free 40S subunits;GTP hydrolysis and joining of the 60S ribosomal subunit;L13a-mediated translational silencing of Ceruloplasmin expression;Major pathway of rRNA processing in the nucleolus and cytosol;Nonsense Mediated Decay (NMD) enhanced by the Exon Junction Complex (EJC);Nonsense Mediated Decay (NMD) independent of the Exon Junction Co…	WP_CYTOPLASMIC_RIBOSOMAL_PROTEINS	-	-	-	+	0.510852	0.412776	-0.122766	-1.07314	5.69376	5.85e-06	P35268	P35268	RL22_HUMAN	Large ribosomal subunit protein eL22	C (7)	+	2806	1160
UBTF	C1	-0.630614	-1.22134	-1.97125	-1.09933	-0.829316	-1.28212	0.463769	0.374326	1.10086	0.88753	0.704811	0.788442	-0.365298	1.40955	0.0245523	0.837333	1.13309	-0.324985	-	-	-	-	NoRC negatively regulates rRNA expression;RNA Polymerase I Chain Elongation;RNA Polymerase I Promoter Escape;RNA Polymerase I Promoter Opening;RNA Polymerase I Transcription Initiation;RNA Polymerase I Transcription Termination	WP_ECTODERM_DIFFERENTIATION	-	-	-	+	0.354895	0.55259	-0.125049	-0.801128	4.39064	8.1e-05	P17480	P17480	UBF1_HUMAN	Nucleolar transcription factor 1	C (7)		2807	896
CUL4A	C1	0.502867	-0.71628	-2.41196	-1.13386	-0.695379	-0.942341	0.906347	0.34072	0.765153	-0.402802	0.314025	0.248716	0.316999	1.04231	-0.753822	1.44741	1.41564	-0.243742	-	-	-	HALLMARK_G2M_CHECKPOINT	DNA Damage Recognition in GG-NER;Dual Incision in GG-NER;Dual incision in TC-NER;Formation of Incision Complex in GG-NER;Formation of TC-NER Pre-Incision Complex;Gap-filling DNA repair synthesis and ligation in TC-NER;Neddylation;Recognition of DNA damage by PCNA-containing replication complex;Transcription-Coupled Nucleotide Excision Repair (TC-NER)	WP_DNA_REPAIR_PATHWAYS_FULL_NETWORK;WP_HIPPOMERLIN_SIGNALING_DYSREGULATION;WP_NUCLEOTIDE_EXCISION_REPAIR;WP_NUCLEOTIDE_EXCISION_REPAIR_IN_XERODERMA_PIGMENTOSUM	-	-	-	+	0.165252	0.770404	0.0383765	0.419789	1.85256	0.0216229	Q13619	Q13619	CUL4A_HUMAN	Cullin-4A	C (7)		2808	1913
SMAP1	C1	0.409584	-0.396954	-0.584974	0.0173854	-1.03092	-1.82049	-0.916489	0.193807	-0.356978	-1.15202	0.0576967	-0.570748	1.50316	0.689877	1.38953	2.0169	0.727335	-0.17571	-	+	STIC_Epithelium PAX8 pos	-	-	-	-	-	-	+	2.51035	0.0085954	0.501515	3.87423	2.66345	0.00222648	Q8IYB5	Q8IYB5	SMAP1_HUMAN	Stromal membrane-associated protein 1	C (7)		2809	2782
LDLRAP1	C1	0.0268559	-1.10472	-0.629681	1.22849	-0.282054	-2.04381	-1.48076	0.315962	-0.438929	-0.280264	0.045871	-0.88368	1.19717	1.3421	1.0248	1.32234	0.194585	0.445718	-	+	STIC_Epithelium PAX8 pos	HALLMARK_APICAL_JUNCTION	Cargo recognition for clathrin-mediated endocytosis;Chylomicron clearance;Clathrin-mediated endocytosis;LDL clearance	WP_CHOLESTEROL_METABOLISM;WP_FAMILIAL_HYPERLIPIDEMIA_TYPE_2;WP_METABOLIC_PATHWAY_OF_LDL_HDL_AND_TG_INCLUDING_DISEASES	-	-	-	+	2.70381	0.00622442	0.603853	4.1507	1.94266	0.00535998	Q5SW96	Q5SW96	ARH_HUMAN	Low density lipoprotein receptor adapter protein 1	C (7)		2810	2302
DDX49	C1	-0.284421	-0.782037	-1.1364	0.412724	-2.2611	-1.76289	-0.0574156	-0.0613035	0.441678	0.110833	0.226102	0.172305	1.20054	1.86254	0.000796506	0.572902	0.978302	0.366839	-	-	-	-	Major pathway of rRNA processing in the nucleolus and cytosol;rRNA modification in the nucleus and cytosol	-	-	-	-	+	1.47185	0.0589493	0.66436	2.45889	2.83751	0.000262944	Q9Y6V7	Q9Y6V7	DDX49_HUMAN	Probable ATP-dependent RNA helicase DDX49	C (7)		2811	4655
FASN	C1	-0.520231	-0.862953	-0.538942	0.330641	-1.20643	-1.1416	-0.297806	-0.426408	-0.154367	-0.273266	-0.575815	-0.114081	2.18284	2.51737	-0.0194476	0.419126	0.889524	-0.20816	-	+	STIC_Epithelium PAX8 pos	HALLMARK_CHOLESTEROL_HOMEOSTASIS;HALLMARK_ESTROGEN_RESPONSE_EARLY;HALLMARK_FATTY_ACID_METABOLISM	Activation of gene expression by SREBF (SREBP);ChREBP activates metabolic gene expression;Fatty acyl-CoA biosynthesis;Vitamin B5 (pantothenate) metabolism	WP_AMPACTIVATED_PROTEIN_KINASE_SIGNALING;WP_ANGIOPOIETINLIKE_PROTEIN_8_REGULATORY_PATHWAY;WP_CHOLESTEROL_METABOLISM_WITH_BLOCH_AND_KANDUTSCHRUSSELL_PATHWAYS;WP_CLEAR_CELL_RENAL_CELL_CARCINOMA_PATHWAYS;WP_FATTY_ACID_BIOSYNTHESIS;WP_FOXA2_PATHWAY;WP_LIPID_METABOLISM_PATHWAY;WP_LIVER_X_RECEPTOR_PATHWAY;WP_METABOLIC_REPROGRAMMING_IN_COLON_CANCER;WP_METABOLIC_REPROGRAMMING_IN_PANCREATIC_CANCER;WP_NUCL…	+	Cancer-related genes, FDA approved drug targets	17	+	1.64425	0.0424376	0.815125	2.69036	2.3441	0.00134313	P49327	P49327	FAS_HUMAN	Fatty acid synthase	C (7)		2812	1313
DGCR8	C1	0.47554	-0.531808	-1.7524	0.502828	-0.224133	-0.52597	-2.70549	0.566063	-0.0719623	-0.461837	-0.160654	0.156827	0.501879	0.882525	0.2339	1.66149	0.848163	0.605042	-	-	-	HALLMARK_DNA_REPAIR	MicroRNA (miRNA) biogenesis	WP_22Q112_COPY_NUMBER_VARIATION_SYNDROME;WP_DDX1_AS_A_REGULATORY_COMPONENT_OF_THE_DROSHA_MICROPROCESSOR;WP_EXRNA_MECHANISM_OF_ACTION_AND_BIOGENESIS;WP_MIRNA_BIOGENESIS	-	-	-	+	1.43166	0.0637585	0.795209	2.40478	1.31087	0.0144889	Q8WYQ5	Q8WYQ5	DGCR8_HUMAN	Microprocessor complex subunit DGCR8	C (7)		2813	3129
BMI1	C1	0.545322	-1.21514	-1.15443	0.641343	-1.53733	-0.879686	-2.51917	0.633992	0.694967	0.52298	0.569921	0.621804	0.696223	0.0377148	0.38308	1.02222	0.388699	0.5475	-	-	-	-	Oxidative Stress Induced Senescence;Regulation of PTEN gene transcription;RUNX1 interacts with co-factors whose precise effect on RUNX1 targets is not known;SUMOylation of chromatin organization proteins;SUMOylation of DNA damage response and repair proteins;SUMOylation of RNA binding proteins;Transcriptional Regulation by E2F6	WP_INTERACTIONS_OF_NATURAL_KILLER_CELLS_IN_PANCREATIC_CANCER;WP_MALIGNANT_PLEURAL_MESOTHELIOMA	-	-	-	+	0.348038	0.559098	0.370913	0.788476	0.819658	0.0483588	P35226	P35226	BMI1_HUMAN	Polycomb complex protein BMI-1	C (7)		2814	1151
LIN54	C1	-0.108472	-2.17289	-0.436877	0.364614	0.0701707	-0.592327	-2.23454	0.605747	-1.06453	0.261496	0.870807	0.0799606	1.4698	0.787582	0.0592113	0.436539	0.793177	0.810536	-	-	-	-	Activation of E2F1 target genes at G1/S;Cyclin A:Cdk2-associated events at S phase entry;Cyclin E associated events during G1/S transition;G0 and Early G1;Polo-like kinase mediated events;Transcription of E2F targets under negative control by DREAM complex;Transcription of E2F targets under negative control by p107 (RBL1) and p130 (RBL2) in complex with HDAC1	WP_DYRK1A	-	-	-	+	1.0462	0.142395	0.533155	1.8774	1.10953	0.0283792	Q6MZP7	Q6MZP7	LIN54_HUMAN	Protein lin-54 homolog	C (7)		2815	2438
RBM12	C1	-0.281625	-1.5745	-2.44916	-0.551032	-0.775756	-1.24614	-0.407101	0.273269	0.751418	0.644561	0.706032	0.234874	0.359385	1.01723	0.978484	0.385651	1.15394	0.780472	-	-	-	-	-	-	-	-	-	+	1.00716	0.153834	0.122192	1.82256	4.2132	0.000276174	Q9NTZ6	Q9NTZ6	RBM12_HUMAN	RNA-binding protein 12	C (7)		2816	4087
CDC5L	C1	-0.426133	-1.4641	-2.3341	-1.00273	-0.6105	-1.00626	-0.417931	0.556742	0.967808	0.263663	0.142324	0.426304	0.144169	1.12062	1.49414	0.46062	0.873541	0.811819	-	-	-	HALLMARK_UV_RESPONSE_UP	mRNA Splicing - Major Pathway	-	-	-	-	+	1.00925	0.153322	0.0988598	1.8255	4.28794	0.00110025	Q99459	Q99459	CDC5L_HUMAN	Cell division cycle 5-like protein	C (7)		2817	3527
SF1	C1	0.106928	-1.83793	-2.26514	-0.893616	-0.370533	-1.1302	-0.502409	0.367523	0.805213	0.380764	0.52736	0.605915	1.00539	0.785896	1.35013	-0.103718	0.968764	0.19967	-	-	-	-	mRNA Splicing - Major Pathway	-	-	-	-	+	0.56509	0.373008	0.0808175	1.16201	3.15679	0.00247165	Q15637	Q15637	SF01_HUMAN	Splicing factor 1	C (7)		2818	2085
HNRNPUL2	C1	-0.436034	-1.40354	-2.4127	-0.617069	-0.639191	-0.876504	-0.0986222	0.207388	0.537648	0.139682	0.204039	-0.0994339	0.744415	1.25464	1.2935	-0.300628	1.36439	1.13802	-	+	STIC_Epithelium PAX8 pos	-	-	-	-	-	-	+	1.70541	0.0375927	0.228966	2.77241	3.95902	0.000411703	Q1KMD3	Q1KMD3	HNRL2_HUMAN	Heterogeneous nuclear ribonucleoprotein U-like protein 2	C (7)		2819	2167
SARNP	C1	-0.428004	-1.37666	-2.38425	-0.298875	-0.404253	-1.00141	-0.469719	0.349969	0.565207	-0.239725	0.208294	0.241234	0.810156	1.23235	1.3488	-0.30527	1.69105	0.461113	-	-	-	-	Cleavage of Growing Transcript in the Termination Region;mRNA 3'-end processing;Transport of Mature mRNA derived from an Intron-Containing Transcript	-	-	-	-	+	1.34689	0.0763177	0.20438	2.29031	3.09836	0.00199623	P82979	P82979	SARNP_HUMAN	SAP domain-containing ribonucleoprotein	C (7)		2820	1652
NUDT21	C1	0.0232277	-1.42735	-2.43072	-0.668483	-0.981102	-0.484943	-0.864524	0.532408	1.4453	0.262065	0.101101	0.512396	0.709324	0.254697	1.05082	-0.0710921	1.33166	0.705208	Unclassified_3	-	-	HALLMARK_DNA_REPAIR;HALLMARK_E2F_TARGETS	Cleavage of Growing Transcript in the Termination Region;mRNA 3'-end processing;mRNA Splicing - Major Pathway;Processing of Intronless Pre-mRNAs	WP_MRNA_PROCESSING	-	-	-	+	0.40805	0.49896	0.106299	0.897013	2.55397	0.00302225	O43809	O43809	CPSF5_HUMAN	Cleavage and polyadenylation specificity factor subunit 5	C (7)		2821	313
U2AF1	C1	0.218094	-1.76345	-2.25823	0.396891	-0.696853	-1.07023	-0.467579	1.08551	0.947799	0.288652	-0.331878	-0.36866	0.311089	0.668079	1.04863	-0.277085	1.26834	1.00087	-	-	-	HALLMARK_MYC_TARGETS_V1	Cleavage of Growing Transcript in the Termination Region;mRNA 3'-end processing;mRNA Splicing - Major Pathway;Transport of Mature mRNA derived from an Intron-Containing Transcript	WP_MRNA_PROCESSING	-	-	-	+	0.653297	0.315676	0.152398	1.30178	1.85337	0.0106001	Q01081	Q01081;Q8WU68	U2AF1_HUMAN	Splicing factor U2AF 35 kDa subunit	C (7)		2822	1686
KHDRBS1	C1	0.152095	-1.72648	-1.72804	0.136968	-0.776986	-1.18769	-1.18326	-0.128605	0.595347	0.330577	0.282102	-0.0366192	0.543715	0.396733	1.52718	0.146515	1.91154	0.744905	-	-	-	-	PTK6 Regulates Proteins Involved in RNA Processing	WP_LEPTIN_SIGNALING_PATHWAY	-	-	-	+	1.40589	0.0674065	0.248465	2.37005	2.46315	0.00493236	Q07666	Q07666;O75525;Q5VWX1	KHDR1_HUMAN	KH domain-containing, RNA-binding, signal transduction-associated protein 1	C (7)		2823	1772
HNRNPA1	C1	-0.175194	-1.86353	-1.69742	-0.479846	-1.01849	-1.08462	-1.04935	0.259795	0.66321	0.187104	0.519385	0.456733	0.842519	0.682299	0.96166	0.477272	1.87824	0.440226	Unclassified_3	-	-	HALLMARK_MYC_TARGETS_V1	FGFR2 alternative splicing;mRNA Splicing - Major Pathway;Processing of Capped Intron-Containing Pre-mRNA	WP_MRNA_PROCESSING	-	-	-	+	1.22164	0.0991638	0.275437	2.11995	3.66657	0.000276331	P09651	P09651	ROA1_HUMAN	Heterogeneous nuclear ribonucleoprotein A1	C (7)		2824	751
BRD2	C1	0.548198	-1.2661	-2.32939	-0.0100435	-0.704118	-1.18098	-0.495561	0.330169	0.276417	-0.051848	-0.153365	-0.084139	0.593218	1.17908	1.16131	0.188572	2.0462	-0.0476243	Ciliated_2	+	STIC_Epithelium PAX8 pos	-	RUNX3 regulates p14-ARF	-	-	-	-	+	1.59316	0.0466046	0.2046	2.62183	2.23745	0.0102785	P25440	P25440	BRD2_HUMAN	Bromodomain-containing protein 2	C (7)		2825	1014
CHRAC1	C1	-0.440975	-0.874995	-3.15839	0.429986	-0.511295	-0.290486	-0.648854	-0.0337848	0.618952	0.0548629	0.140833	0.154948	0.0815181	1.15533	0.470715	1.38319	0.986503	0.481953	-	+	STIC_Epithelium PAX8 pos	-	-	WP_ACUTE_VIRAL_MYOCARDITIS	-	-	-	+	1.66644	0.0404736	0.373318	2.72013	1.85873	0.00500158	Q9NRG0	Q9NRG0	CHRC1_HUMAN	Chromatin accessibility complex protein 1	C (7)		2826	4044
RBBP6	C1	-0.0464275	-1.54432	-2.73022	0.578093	-0.426416	-0.477752	-0.377165	0.0930329	0.615711	-0.0263858	-0.389793	-0.207211	-0.0110705	0.316208	1.41588	1.33455	1.06361	0.819684	Secretory_3	+	STIC_Epithelium PAX8 pos	-	Antigen processing: Ubiquitination & Proteasome degradation	-	-	-	-	+	1.96717	0.0224079	0.292	3.12481	1.95731	0.0080611	Q7Z6E9	Q7Z6E9	RBBP6_HUMAN	E3 ubiquitin-protein ligase RBBP6	C (7)		2827	2636
ACIN1	C1	-0.22314	-1.63459	-2.26207	-0.324114	-0.157299	-0.463308	-0.68943	0.238273	0.943909	-0.267615	0.268034	0.128255	-0.61988	0.898252	0.0640069	0.977117	1.88239	1.24121	-	-	-	-	Apoptotic cleavage of cellular proteins	-	-	-	-	+	0.778905	0.246075	0.130037	1.4927	1.94012	0.0216426	Q9UKV3	Q9UKV3	ACINU_HUMAN	Apoptotic chromatin condensation inducer in the nucleus	C (7)		2828	4381
SAP18	C1	-0.231414	-1.68382	-2.1528	0.468588	-1.00599	-0.319874	-0.819688	0.370128	0.884589	-0.271476	0.114142	-0.236548	0.0094757	1.11225	0.121243	0.612582	1.82678	1.20183	-	-	-	-	HDACs deacetylate histones;NoRC negatively regulates rRNA expression	WP_HEDGEHOG_SIGNALING_PATHWAY_WP47	-	-	-	+	1.25527	0.0925398	0.236765	2.16587	2.07852	0.00827448	O00422	O00422	SAP18_HUMAN	Histone deacetylase complex subunit SAP18	C (7)		2829	124
RBM12B	C1	0.253883	-1.06211	-1.94057	0.518718	-1.0673	-1.01256	-0.38051	0.0173779	0.731399	-0.525386	0.548149	0.228782	0.15891	1.41563	1.82004	-1.01699	1.38491	-0.0723902	-	-	-	-	-	-	-	-	-	+	0.490527	0.42826	0.142585	1.03917	1.25321	0.0439256	Q8IXT5	Q8IXT5	RB12B_HUMAN	RNA-binding protein 12B	C (7)		2830	2770
RBMX	C1	0.0923083	-1.64548	-1.68134	0.105121	-0.45787	-0.623398	-0.6961	0.174092	0.359286	-0.260885	0.668802	0.0968571	-0.11097	2.63903	0.799028	-0.703709	1.25239	-0.00717028	-	-	-	-	mRNA Splicing - Major Pathway;Processing of Capped Intron-Containing Pre-mRNA	WP_MRNA_PROCESSING	-	-	-	+	0.536311	0.393603	0.201845	1.11516	1.2643	0.0322231	P38159	P38159;Q96E39	RBMX_HUMAN	RNA-binding motif protein, X chromosome	C (7)		2831	1192
PNISR	C1	0.119995	-1.82587	-2.08467	-0.139896	-0.801578	-1.13242	-0.147959	0.499925	1.0534	0.243463	0.803903	0.899966	0.246193	1.16425	1.1208	-0.530852	1.08625	-0.574899	-	-	-	-	-	-	-	-	-	+	0.140803	0.803902	-0.0442144	-0.364468	2.31839	0.00472855	Q8TF01	Q8TF01	PNISR_HUMAN	Arginine/serine-rich protein PNISR	C (7)		2832	3051
ALYREF	C1	-0.0552412	-2.17059	-1.63683	0.261764	0.13783	-1.27975	-0.867057	0.0982674	0.338728	0.0675789	0.882108	0.695684	0.107117	1.13638	1.28094	-0.0359753	1.58098	-0.541944	-	-	-	-	Cleavage of Growing Transcript in the Termination Region;mRNA 3'-end processing;mRNA Splicing - Major Pathway;Transport of Mature mRNA derived from an Intron-Containing Transcript;Transport of Mature mRNA Derived from an Intronless Transcript;Transport of the SLBP Dependant Mature mRNA;Transport of the SLBP independent Mature mRNA	-	-	-	-	+	0.406956	0.500021	0.0891225	0.895075	1.43845	0.0405342	Q86V81	Q86V81	THOC4_HUMAN	THO complex subunit 4	C (7)		2833	2672
ARMC5	C1	-0.0828321	-1.60766	-1.59736	0.715286	-0.84375	-1.01492	-0.309849	0.0856638	0.457758	0.194676	-0.0205823	-0.782023	0.70584	1.44914	1.31334	0.814187	1.58778	-1.06469	-	-	-	-	-	-	-	-	-	+	1.11647	0.1235	0.361024	1.97523	1.77594	0.00812435	Q96C12	Q96C12	ARMC5_HUMAN	Armadillo repeat-containing protein 5	C (7)		2834	3265
PRCC	C1	0.301433	-2.92238	-2.3354	0.523199	-0.0572285	0.460442	0.318791	0.670659	0.134834	0.175997	-0.054421	0.291872	0.731568	0.138705	0.314872	0.0764944	0.214995	1.01556	-	-	-	-	mRNA Splicing - Major Pathway	WP_IL18_SIGNALING_PATHWAY;WP_MET_IN_TYPE_1_PAPILLARY_RENAL_CELL_CARCINOMA;WP_TYPE_2_PAPILLARY_RENAL_CELL_CARCINOMA	-	-	-	+	0.394462	0.512925	0.15849	0.872851	0.908047	0.0340904	Q92733	Q92733	PRCC_HUMAN	Proline-rich protein PRCC	C (7)		2835	3163
CWF19L1	C1	0.181449	-3.23518	-2.00898	0.129352	0.339639	0.0897	0.508833	0.367177	0.51558	-0.0528677	0.369807	0.483883	0.0445735	0.554201	0.128903	0.344196	0.42167	0.818073	-	-	-	-	-	-	-	-	-	+	0.0487068	0.928368	0.0224471	0.136794	1.15432	0.015055	Q69YN2	Q69YN2	C19L1_HUMAN	CWF19-like protein 1	C (7)		2836	2412
ZC3H13	C1	-0.0577554	-2.69931	-2.58701	0.0127836	0.0427829	0.436082	0.353542	0.467059	0.612071	0.62554	0.439494	0.372762	0.0491593	0.260464	0.611693	0.903741	-0.157098	0.313998	-	-	-	-	-	-	-	-	-	+	0.414361	0.494147	-0.0783156	-0.908158	1.40383	0.013916	Q5T200	Q5T200	ZC3HD_HUMAN	Zinc finger CCCH domain-containing protein 13	C (7)		2837	2315
PCBP3	C1	0.672423	-3.10481	-2.04877	0.26406	0.0360025	0.47493	-0.0218896	-0.277735	0.197152	0.175236	0.436788	0.244227	0.730455	0.335129	0.894855	0.639391	0.398462	-0.0459039	-	-	-	-	-	-	-	-	-	+	1.24812	0.0940113	0.285775	2.15612	0.83314	0.0492205	P57721	P57721	PCBP3_HUMAN	Poly(rC)-binding protein 3	C (7)		2838	1493
TJAP1	C1	0.0100554	-1.66601	-2.90137	0.622794	0.0196088	-0.26645	0.649558	0.773014	-0.643713	0.437242	0.177222	0.15468	0.696221	1.06803	1.09978	-0.662742	-0.170807	0.602878	-	-	-	-	-	-	-	-	-	+	0.206259	0.719419	0.0777928	0.508801	0.993504	0.0486747	Q5JTD0	Q5JTD0	TJAP1_HUMAN	Tight junction-associated protein 1	C (7)		2839	2278
NXT2	C1	-0.254371	-1.98223	-2.36828	-0.329942	0.582759	-0.899132	0.70806	-0.120975	0.620923	0.366052	-0.49105	-0.441732	1.09824	0.58391	0.0595152	0.501151	1.00289	1.36421	-	-	-	-	-	-	-	-	-	+	1.33755	0.0778995	0.190707	2.27768	2.14707	0.00759603	Q9NPJ8	Q9NPJ8;Q9UKK6	NXT2_HUMAN	NTF2-related export protein 2	C (7)		2840	4007
SRPK2	C1	-0.671399	-2.44781	-1.95792	0.607001	0.224286	0.273682	0.317452	0.209128	0.148094	0.325591	0.289806	-1.59098	0.568	0.551242	0.626065	1.19717	0.611445	0.719143	-	-	-	-	-	WP_MRNA_PROCESSING	-	-	-	+	1.38689	0.0701125	0.750246	2.3444	1.32681	0.0100303	P78362	P78362	SRPK2_HUMAN	SRSF protein kinase 2	C (7)		2841	1633
MED30	C1	-0.315061	-0.334856	-3.09138	-0.615608	-0.602174	-0.578201	-0.333576	0.0970504	0.201557	-0.162332	0.895393	0.432961	0.896076	0.27379	1.58124	1.21699	0.109706	0.328425	-	-	-	-	Generic Transcription Pathway;PPARA activates gene expression;Transcriptional regulation of white adipocyte differentiation	-	-	-	-	+	1.00334	0.154927	0.141169	1.81718	2.28052	0.00761633	Q96HR3	Q96HR3	MED30_HUMAN	Mediator of RNA polymerase II transcription subunit 30	C (7)		2842	3364
RFC5	C1	-0.38963	-0.554065	-3.13895	-0.76852	-0.656288	-0.694894	0.17724	0.0933156	0.131101	0.264372	0.0257061	0.380551	0.622043	0.81151	1.44898	0.854263	0.515061	0.878204	-	+	STIC_Epithelium PAX8 pos	HALLMARK_DNA_REPAIR	Activation of ATR in response to replication stress;Dual Incision in GG-NER;Dual incision in TC-NER;G2/M DNA damage checkpoint;Gap-filling DNA repair synthesis and ligation in GG-NER;Gap-filling DNA repair synthesis and ligation in TC-NER;HDR through Homologous Recombination (HRR);HDR through Single Strand Annealing (SSA);PCNA-Dependent Long Patch Base Excision Repair;Polymerase switching;Polymer…	WP_7Q1123_COPY_NUMBER_VARIATION_SYNDROME;WP_DNA_MISMATCH_REPAIR;WP_DNA_REPAIR_PATHWAYS_FULL_NETWORK;WP_DNA_REPLICATION;WP_NUCLEOTIDE_EXCISION_REPAIR;WP_NUCLEOTIDE_EXCISION_REPAIR_IN_XERODERMA_PIGMENTOSUM;WP_RETINOBLASTOMA_GENE_IN_CANCER	-	-	-	+	3.11298	0.00296641	0.478667	4.75795	3.38648	0.000137646	P40937	P40937	RFC5_HUMAN	Replication factor C subunit 5	C (7)		2843	1212
FNBP4	C1	-0.228083	-0.913766	-2.91316	-0.139474	-0.963558	-1.13771	0.0499486	0.246183	0.559883	0.592507	0.645254	0.712951	1.07478	1.05427	1.11566	0.298927	-0.282029	0.227416	-	-	-	-	-	-	-	-	-	+	0.172488	0.762236	0.0443234	0.435825	2.86598	0.00111765	Q8N3X1	Q8N3X1	FNBP4_HUMAN	Formin-binding protein 4	C (7)		2844	2848
FAM136A	C1	-0.448163	-0.626863	-2.69488	-0.145005	-1.51612	-0.861907	-0.0327122	0.117299	0.0197973	0.0741046	0.167883	0.152731	1.00433	1.21703	0.96407	1.33184	0.613553	0.662997	-	+	STIC_Epithelium PAX8 pos	-	-	-	-	-	-	+	4.55677	0.000676056	0.777585	7.24501	4.14386	3e-05	Q96C01	Q96C01	F136A_HUMAN	Protein FAM136A	C (7)		2845	3263
MED6	C1	-0.786263	-0.834243	-2.66479	-0.114236	-1.40882	-0.963468	-0.0366757	0.666424	0.634983	-0.24178	0.21964	0.686201	0.563728	0.81998	1.20118	0.547404	0.720427	0.99031	-	-	-	-	Generic Transcription Pathway;PPARA activates gene expression;Transcriptional regulation of white adipocyte differentiation	-	-	-	-	+	1.50485	0.0549332	0.218572	2.50327	4.1002	0.000131148	O75586	O75586	MED6_HUMAN	Mediator of RNA polymerase II transcription subunit 6	C (7)		2846	435
USP28	C1	0.245861	-0.697731	-2.60396	-0.157394	-1.44178	-1.16659	-0.830694	0.321496	0.244491	0.630661	0.124569	0.173767	0.634359	0.413562	0.81402	0.975782	1.03205	1.28752	-	+	STIC_Epithelium PAX8 pos	-	Ub-specific processing proteases	-	-	-	-	+	1.9818	0.0216805	0.564866	3.14462	2.96306	0.000273406	Q96RU2	Q96RU2	UBP28_HUMAN	Ubiquitin carboxyl-terminal hydrolase 28	C (7)		2847	3492
MRTO4	C1	-0.547471	-0.644272	-3.31603	-0.176857	-0.850311	-0.597337	0.195552	0.493978	0.639013	0.274143	0.397639	0.48921	0.379396	0.91491	-0.0674646	0.92161	0.92527	0.569023	-	-	-	HALLMARK_MYC_TARGETS_V2	-	-	-	-	-	+	0.520791	0.404991	0.178241	1.08961	2.67064	0.00040315	Q9UKD2	Q9UKD2	MRT4_HUMAN	mRNA turnover protein 4 homolog	C (7)		2848	4368
TSR1	C1	-0.196713	-0.819237	-3.22044	0.131096	-0.429985	-1.23663	0.293214	0.438086	0.431127	0.36819	0.553058	0.308346	0.328151	0.0301645	0.0468924	1.28213	0.858421	0.834124	-	-	-	-	Major pathway of rRNA processing in the nucleolus and cytosol	-	-	-	-	+	0.344514	0.562177	0.106649	0.781948	2.22344	0.00173099	Q2NL82	Q2NL82	TSR1_HUMAN	Pre-rRNA-processing protein TSR1 homolog	C (7)		2849	2178
MOV10	C1	-0.604068	-0.164736	-3.50081	-0.362172	0.00874165	-0.867694	0.376416	0.453022	0.49791	0.490784	0.549242	0.378879	0.77683	0.180101	0.481797	0.867263	0.704485	-0.265991	-	-	-	HALLMARK_INTERFERON_ALPHA_RESPONSE	Ca2+ pathway;Competing endogenous RNAs (ceRNAs) regulate PTEN translation;MAPK6/MAPK4 signaling;Oncogene Induced Senescence;Oxidative Stress Induced Senescence;Pre-NOTCH Transcription and Translation;Regulation of PTEN mRNA translation;Regulation of RUNX1 Expression and Activity;RUNX1 regulates genes involved in megakaryocyte differentiation and platelet function;TP53 Regulates Metabolic Genes	WP_VEGFAVEGFR2_SIGNALING	-	-	-	+	0.000558425	0.998901	-0.000301361	-0.00165121	1.90817	0.00220089	Q9HCE1	Q9HCE1	MOV10_HUMAN	Helicase MOV-10	C (7)		2850	3973
GRB7	C1	-0.334088	-0.500946	-3.37417	-0.632607	-0.419917	-0.791162	0.724111	0.706868	0.575092	0.264527	0.51932	0.576658	0.0829968	-0.136289	0.705116	0.926862	0.671896	0.435732	-	-	-	HALLMARK_APICAL_JUNCTION	Downstream signal transduction;GRB7 events in ERBB2 signaling;RET signaling;Signaling by SCF-KIT;Tie2 Signaling	WP_17Q12_COPY_NUMBER_VARIATION_SYNDROME;WP_KIT_RECEPTOR_SIGNALING_PATHWAY;WP_RAC1PAK1P38MMP2_PATHWAY	-	-	-	+	0.26754	0.646336	-0.0767967	-0.634366	2.53679	0.000797474	Q14451	Q14451	GRB7_HUMAN	Growth factor receptor-bound protein 7	C (7)		2851	1974
CCDC137	C1	-1.09459	-0.482887	-3.15663	-0.238375	-0.0128592	-0.684519	0.129749	0.659833	0.0297439	0.404297	0.55575	0.567965	0.281859	1.10382	-0.294383	1.46548	0.435464	0.330284	-	-	-	-	-	-	-	-	-	+	0.242666	0.675485	0.111396	0.584369	2.11383	0.00202326	Q6PK04	Q6PK04	CC137_HUMAN	Coiled-coil domain-containing protein 137	C (7)		2852	2502
ARGLU1	C1	-0.501819	-1.67047	-2.63651	-0.30478	-0.0582176	-0.681577	-0.339812	0.495242	0.360053	0.128767	0.797552	0.841321	0.0670219	0.563284	1.01011	1.30504	1.13532	-0.510517	-	-	-	-	-	-	-	-	-	+	0.266534	0.647053	0.05803	0.632367	2.33668	0.00628727	Q9NWB6	Q9NWB6	ARGL1_HUMAN	Arginine and glutamate-rich protein 1	C (7)		2853	4139
STK19	C1	-0.453079	-1.32249	-2.81076	-0.375448	-0.451598	-0.605881	-0.0662281	0.80203	0.688907	-0.185366	0.619717	0.145613	1.14447	-0.136085	0.532548	1.57244	0.887032	0.0141741	-	-	-	-	-	WP_MELANOMA	-	-	-	+	0.494538	0.425263	0.184888	1.0459	2.61991	0.000912587	P49842	P49842	STK19_HUMAN	Serine/threonine-protein kinase 19	C (7)		2854	1344
STAG1	C1	-0.253306	-0.171768	-3.57438	0.216306	-0.3414	-0.272548	0.272814	0.588435	0.164735	0.172469	0.359375	0.506643	-0.305702	-0.446116	0.934072	0.559357	0.417648	1.17337	-	-	-	HALLMARK_E2F_TARGETS;HALLMARK_G2M_CHECKPOINT	Cohesin Loading onto Chromatin;Establishment of Sister Chromatid Cohesion;Meiotic synapsis;Resolution of Sister Chromatid Cohesion;Separation of Sister Chromatids;SUMOylation of DNA damage response and repair proteins	WP_CELL_CYCLE;WP_REGULATION_OF_SISTER_CHROMATID_SEPARATION_AT_THE_METAPHASEANAPHASE_TRANSITION	-	-	-	+	0.0583338	0.914745	0.0273314	0.162288	1.09126	0.0271994	Q8WVM7	Q8WVM7	STAG1_HUMAN	Cohesin subunit SA-1	C (7)		2855	3091
TAF9	C1	-0.148949	-0.554375	-3.48316	0.0920771	-0.869098	-0.285353	0.433563	0.024233	0.6195	-0.0746414	0.33214	0.231053	0.503529	0.373002	1.04752	0.349327	0.289057	1.12057	-	-	-	HALLMARK_DNA_REPAIR	HATs acetylate histones;HIV Transcription Initiation;Regulation of TP53 Activity through Phosphorylation;RNA Polymerase II HIV Promoter Escape;RNA Polymerase II Pre-transcription Events;RNA Polymerase II Promoter Escape;RNA polymerase II transcribes snRNA genes;RNA Polymerase II Transcription Initiation;RNA Polymerase II Transcription Initiation And Promoter Clearance;RNA Polymerase II Transcript…	WP_EUKARYOTIC_TRANSCRIPTION_INITIATION	-	-	-	+	1.06984	0.13603	0.126091	1.91042	1.81456	0.00951143	Q16594	Q16594;Q9HBM6	TAF9_HUMAN	Transcription initiation factor TFIID subunit 9	C (7)		2856	2128
ACBD6	C1	-0.885658	-0.437967	-3.11919	0.272406	-0.296253	-0.41911	-0.202417	0.155811	0.291979	-0.0256985	0.0629748	0.15284	0.646505	-0.174871	1.9162	0.470947	0.50444	1.08706	-	-	-	-	-	-	-	-	-	+	1.32624	0.0796746	0.507473	2.26235	1.83124	0.00348108	Q9BR61	Q9BR61	ACBD6_HUMAN	Acyl-CoA-binding domain-containing protein 6	C (7)		2857	3600
SUGP1	C1	-0.0282416	-0.411377	-3.45045	-0.0487172	0.280849	-0.937016	-0.302903	0.395601	0.190277	0.259107	0.097389	0.228863	0.209586	0.825753	0.923423	0.0639142	0.343383	1.36056	-	-	-	-	mRNA Splicing - Major Pathway	WP_MRNA_PROCESSING	-	-	-	+	1.21659	0.100378	0.159998	2.11304	1.40587	0.024231	Q8IWZ8	Q8IWZ8	SUGP1_HUMAN	SURP and G-patch domain-containing protein 1	C (7)		2858	2756
CASC3	C1	0.00626701	-0.171411	-3.72096	-0.142897	0.338127	-0.626477	0.338703	0.304205	0.168178	0.256413	0.263466	0.405312	0.66182	0.409738	1.14886	-0.0849664	0.0992165	0.346407	-	-	-	-	Cleavage of Growing Transcript in the Termination Region;mRNA 3'-end processing;mRNA Splicing - Major Pathway;Nonsense Mediated Decay (NMD) enhanced by the Exon Junction Complex (EJC);Regulation of expression of SLITs and ROBOs;Transport of Mature mRNA derived from an Intron-Containing Transcript	-	-	-	-	+	0.341861	0.565786	0.0698748	0.777021	1.05921	0.03572	O15234	O15234	CASC3_HUMAN	Protein CASC3	C (7)		2859	226
TAF6L	C1	0.33329	-0.0278503	-3.40221	-0.47094	-0.320251	-0.585002	0.0789932	0.734428	0.313663	-0.831917	0.261808	0.0550867	0.79674	0.501401	1.20558	0.248709	0.220327	0.888149	-	-	-	-	HATs acetylate histones	-	-	-	-	+	1.16829	0.110532	0.179996	2.04676	1.383	0.0258456	Q9Y6J9	Q9Y6J9	TAF6L_HUMAN	TAF6-like RNA polymerase II p300/CBP-associated factor-associated factor 65 kDa subunit 6L	C (7)		2860	4645
NT5C3B	C1	0.528889	-0.951484	-3.28171	-0.0505179	-0.316842	-0.71189	0.525437	0.548655	0.90406	0.362977	0.197531	0.0912834	-0.50177	-0.142745	0.743051	0.717635	1.22928	0.108161	-	-	-	-	mRNA decay by 3' to 5' exoribonuclease	-	-	-	-	+	0.102754	0.854131	-0.0356414	-0.274473	1.34168	0.019427	Q969T7	Q969T7	5NT3B_HUMAN	7-methylguanosine phosphate-specific 5'-nucleotidase	C (7)		2861	3219
GRHL2	C1	0.0569394	-0.148107	-3.20686	-0.99306	-0.154541	-0.848048	0.844296	0.333281	0.170575	0.330782	0.50839	-0.345182	0.559153	0.0835565	1.4356	0.286383	1.07651	0.0103376	-	-	-	-	-	WP_ENDODERM_DIFFERENTIATION;WP_MESODERMAL_COMMITMENT_PATHWAY	-	-	-	+	0.43615	0.473814	0.0760585	0.946278	1.80136	0.0143985	Q6ISB3	Q6ISB3	GRHL2_HUMAN	Grainyhead-like protein 2 homolog	C (7)		2862	2436
PDAP1	C1	-0.389903	-0.897407	-2.43555	-1.13912	-0.237231	-1.3408	1.43398	0.469777	-0.0443909	-0.0220418	0.792677	0.329296	-0.120009	0.505154	0.722608	1.32362	-0.126724	1.17607	-	-	-	HALLMARK_MTORC1_SIGNALING;HALLMARK_UV_RESPONSE_UP	Neutrophil degranulation	-	-	-	-	+	0.0948621	0.865653	0.0227617	0.255146	3.07739	0.00218276	Q13442	Q13442	HAP28_HUMAN	28 kDa heat- and acid-stable phosphoprotein	C (7)		2863	1882
ORC5	C1	0.039515	-0.29533	-2.86301	-0.959435	-0.216245	-1.4229	0.446983	0.0655876	0.36076	-0.1273	0.347712	-0.0835309	0.0388057	0.349778	0.879368	1.65567	0.804583	0.978984	-	-	-	HALLMARK_G2M_CHECKPOINT	Activation of ATR in response to replication stress;Activation of the pre-replicative complex;Assembly of the ORC complex at the origin of replication;Assembly of the pre-replicative complex;Association of licensing factors with the pre-replicative complex;CDC6 association with the ORC:origin complex;CDT1 association with the CDC6:ORC:origin complex;E2F-enabled inhibition of pre-replication compl…	WP_CELL_CYCLE;WP_DNA_REPLICATION;WP_G1_TO_S_CELL_CYCLE_CONTROL	-	-	-	+	1.48378	0.0576647	0.284134	2.47493	2.58441	0.00139328	O43913	O43913	ORC5_HUMAN	Origin recognition complex subunit 5	C (7)		2864	324
MED28	C1	-1.00885	-1.40948	-2.64349	0.0943082	0.424713	-0.97315	0.530109	0.0582539	-0.407556	-0.000115548	-0.194597	0.533529	0.329595	0.731873	1.28967	1.30666	0.363092	0.975441	-	+	STIC_Epithelium PAX8 pos	-	PPARA activates gene expression;Transcriptional regulation of white adipocyte differentiation	-	-	-	-	+	1.99792	0.0208848	0.29935	3.16645	2.56977	0.00188172	Q9H204	Q9H204	MED28_HUMAN	Mediator of RNA polymerase II transcription subunit 28	C (7)		2865	3821
ORC2	C1	0.801994	-0.904259	-2.83752	-0.0353262	-0.618625	-1.05561	0.257117	-0.523098	0.574676	-0.304974	0.150551	0.0775915	0.303743	-0.0400037	1.06478	1.05334	0.389875	1.64575	-	-	-	HALLMARK_E2F_TARGETS;HALLMARK_MYC_TARGETS_V1	Activation of ATR in response to replication stress;Activation of the pre-replicative complex;Assembly of the ORC complex at the origin of replication;Assembly of the pre-replicative complex;Association of licensing factors with the pre-replicative complex;CDC6 association with the ORC:origin complex;CDT1 association with the CDC6:ORC:origin complex;E2F-enabled inhibition of pre-replication compl…	WP_CELL_CYCLE;WP_DNA_REPLICATION;WP_G1_TO_S_CELL_CYCLE_CONTROL	-	-	-	+	1.36393	0.0737874	0.23596	2.31338	1.68439	0.0133869	Q13416	Q13416	ORC2_HUMAN	Origin recognition complex subunit 2	C (7)		2866	1875
INTS12	C1	-0.242972	-0.44976	-3.6128	-0.663691	0.12494	-0.0393821	-0.113006	0.519843	0.682328	0.20386	0.231026	-0.12802	0.367099	0.53664	0.644264	0.991568	0.252209	0.695851	-	-	-	-	RNA polymerase II transcribes snRNA genes	-	-	-	-	+	1.16283	0.111802	0.186884	2.03925	1.51625	0.0104699	Q96CB8	Q96CB8	INT12_HUMAN	Integrator complex subunit 12	C (7)		2867	3275
POP7	C1	-0.319899	-0.587306	-3.46203	-0.353209	0.0042748	-0.115037	-0.07403	0.175703	0.209301	0.14668	-0.0567455	0.138875	0.43584	0.883374	-0.0189411	1.28463	0.519271	1.18925	-	+	STIC_Epithelium PAX8 pos	HALLMARK_E2F_TARGETS	tRNA processing in the nucleus	-	-	-	-	+	1.87161	0.0269693	0.341694	2.99581	1.73297	0.00627967	O75817	O75817	POP7_HUMAN	Ribonuclease P protein subunit p20	C (7)		2868	456
SMNDC1	C1	0.435871	-0.917891	-3.36426	-0.882515	0.0342128	-0.0166372	0.601336	0.0919126	0.80985	0.119503	0.314776	0.0492795	0.583483	0.757132	-0.196097	0.910551	-0.266058	0.935547	-	-	-	-	mRNA Splicing - Major Pathway	-	-	-	-	+	0.192508	0.73637	0.0639183	0.479442	1.29994	0.0183617	O75940	O75940	SPF30_HUMAN	Survival of motor neuron-related-splicing factor 30	C (7)		2869	473
ESS2	C1	0.402889	-0.735555	-3.35554	-0.484676	0.282327	0.510248	0.209727	-0.59251	-0.0675903	0.231161	-0.231496	-0.423574	1.26598	0.105745	0.830818	0.896221	0.560157	0.595673	-	+	STIC_Epithelium PAX8 pos	-	-	-	-	-	-	+	2.65386	0.00677067	0.501097	4.07872	1.14776	0.0241726	Q96DF8	Q96DF8	ESS2_HUMAN	Splicing factor ESS-2 homolog	C (7)		2870	3292
UBE2V2	C1	0.0393398	-0.133656	-3.56044	-0.876927	0.410711	0.164352	0.317658	0.440245	0.175931	0.125154	-0.0191078	-0.114003	1.15658	0.557351	0.464915	0.854444	0.44027	-0.442825	-	-	-	-	Antigen processing: Ubiquitination & Proteasome degradation;E3 ubiquitin ligases ubiquitinate target proteins;Formation of Incision Complex in GG-NER;G2/M DNA damage checkpoint;Nonhomologous End-Joining (NHEJ);Processing of DNA double-strand break ends;Recruitment and ATM-mediated phosphorylation of repair and signaling proteins at DNA double strand breaks	-	-	-	-	+	0.776371	0.247145	0.26099	1.48893	0.945459	0.0359512	Q15819	Q15819	UB2V2_HUMAN	Ubiquitin-conjugating enzyme E2 variant 2	C (7)		2871	2107
NR2F6	C1	-0.238771	-0.713041	-3.37227	-0.348628	-0.603441	0.771126	0.0725601	0.458124	0.348262	-0.129121	0.371787	-0.4098	0.838834	1.22695	0.71103	0.486921	0.604527	-0.0750459	-	-	-	-	Nuclear Receptor transcription pathway	WP_CIRCADIAN_RHYTHM_GENES;WP_IL6_SIGNALING_PATHWAY;WP_NUCLEAR_RECEPTORS	-	-	-	+	1.35191	0.0756705	0.324838	2.29711	1.37821	0.0123686	P10588	P10588;P24468	NR2F6_HUMAN	Nuclear receptor subfamily 2 group F member 6	C (7)		2872	781
SMPD4	C1	0.0769419	-0.00509144	-3.80181	-0.0599709	-0.276806	0.063494	-0.251557	0.0721118	0.252375	0.107813	0.102732	0.133135	0.576254	0.40596	0.466574	0.882071	0.66607	0.589698	-	+	STIC_Epithelium PAX8 pos	-	Glycosphingolipid metabolism	-	-	-	-	+	3.54421	0.00142857	0.45482	5.43807	1.09241	0.0212457	Q9NXE4	Q9NXE4	NSMA3_HUMAN	Sphingomyelin phosphodiesterase 4	C (7)		2873	4159
RBMS2	C1	-0.149932	0.0208238	-3.67321	0.103837	0.11424	0.205716	-0.33964	0.584766	-0.300029	0.0387656	-0.0639528	-0.120144	0.0682713	0.817905	0.403676	1.08649	0.836997	0.365413	-	+	STIC_Epithelium PAX8 pos	-	-	-	-	-	-	+	1.91363	0.0248487	0.489916	3.05246	0.884751	0.0420949	Q15434	Q15434;P29558	RBMS2_HUMAN	RNA-binding motif, single-stranded-interacting protein 2	C (7)		2874	2073
COQ6	C1	0.0554585	-0.0561265	-3.68575	0.0467468	-0.251586	0.0978687	0.0483786	0.333297	0.0812901	0.0893218	0.163489	-0.0239926	0.205648	1.4783	0.121623	0.0180835	0.88322	0.394725	-	-	-	-	Ubiquinol biosynthesis	WP_NEPHROTIC_SYNDROME;WP_RIBOFLAVIN_AND_COQ_DISORDERS	-	-	-	+	0.929383	0.180756	0.325578	1.71211	0.894245	0.0399475	Q9Y2Z9	Q9Y2Z9	COQ6_HUMAN	Ubiquinone biosynthesis monooxygenase COQ6, mitochondrial	C (7)		2875	4520
PCF11	C1	-0.346324	-0.684839	-3.57685	0.0390746	-0.0293027	-0.601905	-0.0774055	0.61008	0.37168	0.244424	0.584114	0.416644	0.536633	0.271054	0.482185	0.107192	0.519298	1.13425	-	-	-	-	Cleavage of Growing Transcript in the Termination Region;mRNA 3'-end processing;mRNA Splicing - Major Pathway;Processing of Intronless Pre-mRNAs;RNA polymerase II transcribes snRNA genes	-	-	-	-	+	0.383026	0.524003	0.0722949	0.852336	1.67284	0.00839267	O94913	O94913	PCF11_HUMAN	Pre-mRNA cleavage complex 2 protein Pcf11	C (7)		2876	505
RRP9	C1	-0.350175	-0.520745	-3.45113	-0.34371	-0.593213	-0.366094	-0.0239344	0.239306	0.606489	0.351532	0.599601	0.545901	0.591314	0.781879	-0.0371849	0.0624641	0.731195	1.1765	-	-	-	HALLMARK_MTORC1_SIGNALING;HALLMARK_MYC_TARGETS_V1;HALLMARK_MYC_TARGETS_V2;HALLMARK_UNFOLDED_PROTEIN_RESPONSE	Major pathway of rRNA processing in the nucleolus and cytosol;rRNA modification in the nucleus and cytosol	-	-	-	-	+	0.337509	0.570237	0.162259	0.768916	2.0685	0.00156156	O43818	O43818	U3IP2_HUMAN	U3 small nucleolar RNA-interacting protein 2	C (7)		2877	316
MMTAG2	C1	-0.456265	-1.05328	-3.03764	-0.182878	-0.386513	-0.555781	0.125005	0.191864	0.250362	0.200358	0.326767	0.28318	-0.23579	0.768024	0.551042	0.681018	0.55585	1.97468	-	-	-	-	Neutrophil degranulation	-	-	-	-	+	0.893302	0.194261	0.459369	1.66026	2.3562	0.000798194	Q9BU76	Q9BU76	MMTA2_HUMAN	Multiple myeloma tumor-associated protein 2	C (7)		2878	3653
FABP3	C1	-0.649847	-0.319756	-3.0419	-0.348842	-0.778083	-0.779005	1.28215	0.60018	0.386387	0.0847368	0.580747	0.201273	-0.258929	0.431324	-0.119668	0.300692	1.36131	1.06723	-	-	-	HALLMARK_MYOGENESIS	Triglyceride catabolism	WP_FATTY_ACID_TRANSPORTERS;WP_PPAR_SIGNALING_PATHWAY	-	-	-	+	0.0680546	0.900936	-0.100219	-0.187578	2.36066	0.000502513	P05413	P05413	FABPH_HUMAN	Fatty acid-binding protein, heart	C (7)		2879	676
TMEM209	C1	-0.201496	-0.213243	-3.34274	-0.367954	-0.107893	-1.16374	0.326462	0.179265	0.0973967	-0.274824	0.240118	0.182827	0.990223	0.853621	0.346531	0.673635	0.727531	1.05428	-	+	STIC_Epithelium PAX8 pos	-	-	-	-	-	-	+	3.14403	0.00291892	0.206785	4.80544	2.27543	0.00497592	Q96SK2	Q96SK2	TM209_HUMAN	Transmembrane protein 209	C (7)		2880	3504
MCM3AP	C1	0.160352	-0.879442	-3.49866	0.3952	0.406638	-1.02446	0.308945	0.560507	0.288366	0.0273549	0.299377	0.094594	0.711558	0.662051	0.00253588	0.0576258	0.590573	0.836882	-	-	-	-	-	-	-	-	-	+	0.652862	0.315861	0.077895	1.30111	1.15253	0.0390268	O60318	O60318	GANP_HUMAN	Germinal-center associated nuclear protein	C (7)		2881	341
MED4	C1	-0.453968	-1.13496	-3.23085	0.27131	-0.566498	-0.864534	-0.137101	0.445061	0.83226	0.118566	0.641036	0.559791	0.359927	0.447619	0.918437	0.504632	0.548797	0.740472	-	-	-	-	Generic Transcription Pathway;PPARA activates gene expression;Transcriptional regulation of white adipocyte differentiation	-	-	-	-	+	0.496057	0.424555	0.0844593	1.04845	2.46836	0.00162864	Q9NPJ6	Q9NPJ6	MED4_HUMAN	Mediator of RNA polymerase II transcription subunit 4	C (7)		2882	4006
ARID2	C1	-0.289289	-1.06165	-3.07205	0.326144	0.0040314	-1.38214	0.0718031	-0.0944636	0.706792	-0.0499013	0.50821	0.221895	0.154711	0.361697	1.07045	0.824445	1.05848	0.640837	-	-	-	-	RMTs methylate histone arginines;RUNX1 interacts with co-factors whose precise effect on RUNX1 targets is not known	-	-	-	-	+	1.33958	0.0776629	0.217734	2.28042	2.11611	0.00328883	Q68CP9	Q68CP9	ARID2_HUMAN	AT-rich interactive domain-containing protein 2	C (7)		2883	2402
RNPS1	C1	-0.634803	-1.81981	-2.38265	0.214455	-0.432972	-0.691579	0.117906	-0.0871025	0.235254	0.457867	0.738374	0.421248	-0.483541	0.971185	0.362862	0.182205	1.93418	0.896921	-	-	-	HALLMARK_MYC_TARGETS_V1	Cleavage of Growing Transcript in the Termination Region;mRNA 3'-end processing;mRNA Splicing - Major Pathway;Nonsense Mediated Decay (NMD) enhanced by the Exon Junction Complex (EJC);Regulation of expression of SLITs and ROBOs;Transport of Mature mRNA derived from an Intron-Containing Transcript	WP_MRNA_PROCESSING	-	-	-	+	0.424104	0.484258	0.129875	0.925271	2.2904	0.00320522	Q15287	Q15287	RNPS1_HUMAN	RNA-binding protein with serine-rich domain 1	C (7)		2884	2056
PPP1R8	C1	-1.12474	-1.29818	-2.50589	-0.397187	-0.441283	-0.648545	-0.203539	0.81831	0.305499	0.33874	0.504633	0.413208	-0.342978	1.24904	1.16185	0.137167	1.5355	0.498396	-	-	-	HALLMARK_E2F_TARGETS	-	WP_ENDOPLASMIC_RETICULUM_STRESS_RESPONSE_IN_CORONAVIRUS_INFECTION	-	-	-	+	0.497144	0.423873	0.113442	1.05027	3.20503	0.000934319	Q12972	Q12972	PP1R8_HUMAN	Nuclear inhibitor of protein phosphatase 1	C (7)		2885	1838
FKBP10	C1	-0.972182	-0.875124	-3.44588	0.151114	0.321165	0.26399	-0.0554557	-0.19771	0.492471	0.606708	0.660385	0.337489	0.329655	0.789986	0.268441	0.157529	1.08641	0.0810077	-	-	-	-	-	WP_TYPE_I_COLLAGEN_SYNTHESIS_IN_THE_CONTEXT_OF_OSTEOGENESIS_IMPERFECTA	-	-	-	+	0.282805	0.629207	0.140288	0.66445	1.20428	0.0142597	Q96AY3	Q96AY3	FKB10_HUMAN	Peptidyl-prolyl cis-trans isomerase FKBP10	C (7)		2886	3247
ATN1	C1	-0.386874	-0.95179	-0.84834	0.355221	-0.907384	-0.392511	-0.984408	1.2291	-1.36167	-1.32078	1.34092	-0.231926	-0.72853	0.773848	1.25037	1.2788	0.73784	1.14811	-	-	-	-	Regulation of PTEN gene transcription	-	-	-	-	+	0.872443	0.203631	0.964668	1.63008	1.20163	0.0140884	P54259	P54259	ATN1_HUMAN	Atrophin-1	C (7)		2887	1440
BCL9	C1	-1.21971	-1.02544	-0.425162	-0.432851	-1.23674	-0.673548	-0.636713	1.32142	-0.869938	-1.27854	0.896375	-0.508203	0.679906	1.12527	0.768367	0.999828	1.15332	1.36235	-	+	STIC_Epithelium PAX8 pos	-	Deactivation of the beta-catenin transactivating complex;Formation of the beta-catenin:TCF transactivating complex	WP_1Q211_COPY_NUMBER_VARIATION_SYNDROME;WP_WNT_SIGNALING_PATHWAY;WP_WNTBETACATENIN_SIGNALING_PATHWAY_IN_LEUKEMIA	-	-	-	+	1.67422	0.0399035	1.21365	2.73056	3.1624	0.000135402	O00512	O00512	BCL9_HUMAN	B-cell CLL/lymphoma 9 protein	C (7)		2888	136
CEP55	C1	1.00852	-0.96782	-1.20432	-1.2577	-0.579305	0.30927	0.0358899	1.21335	-1.01246	-1.65529	1.47599	-1.13754	0.827749	0.370283	0.845348	1.05047	0.368094	0.30947	-	-	-	-	-	-	-	-	-	+	0.766901	0.252472	0.95302	1.4748	0.817221	0.0424941	Q53EZ4	Q53EZ4	CEP55_HUMAN	Centrosomal protein of 55 kDa	C (7)		2889	2231
TEAD3	C1	-0.523196	-1.6654	-2.00218	0.228435	-0.262395	0.00260151	1.11268	0.192755	-0.475383	-1.32351	0.75953	-0.990915	1.54627	0.656747	0.895871	0.414585	1.02256	0.410953	-	-	-	-	PPARA activates gene expression;RUNX3 regulates YAP1-mediated transcription;YAP1- and WWTR1 (TAZ)-stimulated gene expression	WP_HIPPO_SIGNALING_REGULATION_PATHWAYS;WP_HIPPOMERLIN_SIGNALING_DYSREGULATION;WP_HIPPOYAP_SIGNALING;WP_LEUKOCYTEINTRINSIC_HIPPO_PATHWAY_FUNCTIONS;WP_MALIGNANT_PLEURAL_MESOTHELIOMA;WP_MECHANOREGULATION_AND_PATHOLOGY_OF_YAPTAZ_VIA_HIPPO_AND_NONHIPPO_MECHANISMS;WP_MIR5093P_ALTERATION_OF_YAP1ECM_AXIS;WP_TRANSCRIPTION_COFACTORS_SKI_AND_SKIL_PROTEIN_PARTNERS	-	-	-	+	1.26342	0.0908341	0.578636	2.17699	1.77344	0.00501392	Q99594	Q99594	TEAD3_HUMAN	Transcriptional enhancer factor TEF-5	C (7)		2890	3538
RABIF	C1	0.153276	0.230892	-2.02939	0.0745611	0.145564	0.317653	0.368737	0.286621	0.224744	-2.14142	0.293825	-2.03211	0.658396	0.410766	1.1832	0.238211	0.460697	1.15578	-	-	-	HALLMARK_COAGULATION;HALLMARK_COMPLEMENT	-	WP_RETINOBLASTOMA_GENE_IN_CANCER	-	-	-	+	1.31191	0.0822124	1.78664	2.2429	1.00554	0.0209155	P47224	P47224	MSS4_HUMAN	Guanine nucleotide exchange factor MSS4	C (7)		2891	1284
MED16	C1	0.216595	-0.0670846	-1.44696	-1.90603	-1.68794	0.279659	0.4215	0.407588	0.709393	-2.009	0.615384	0.552235	0.572276	0.48545	0.84839	0.422828	0.726426	0.859297	-	-	-	-	Generic Transcription Pathway;PPARA activates gene expression;Transcriptional regulation of white adipocyte differentiation	-	-	-	-	+	0.610515	0.342642	0.500155	1.23467	1.47161	0.00713325	Q9Y2X0	Q9Y2X0	MED16_HUMAN	Mediator of RNA polymerase II transcription subunit 16	C (7)		2892	4513
GORAB	C1	0.33957	-0.307416	-1.30199	-0.697593	-1.73356	-0.140115	-0.9493	1.06698	0.184509	-1.94515	0.424673	0.75724	0.620825	0.151347	1.07907	0.17709	0.511099	1.76271	-	-	-	-	-	-	-	-	-	+	0.78021	0.245717	0.599606	1.49464	1.29564	0.0131615	Q5T7V8	Q5T7V8	GORAB_HUMAN	RAB6-interacting golgin	C (7)		2893	2334
Krt7	C1	-0.0343072	0.767148	-1.28572	-0.0410618	-1.95568	-1.46789	0.382913	1.13773	0.700601	-1.77213	1.27669	0.865492	0.49259	0.530647	0.0449413	-0.587327	0.414665	0.530698	Secretory_2;Secretory_3	-	-	-	-	-	-	-	-	+	0.153384	0.786655	-0.240468	-0.393163	0.911146	0.030469	Cont_Q9DCV7	O95678;Cont_O95678;Cont_Q9DCV7	K2C7_MOUSE	Keratin, type II cytoskeletal 7	C (7)		2894	91
HAUS8	C1	-2.15066	0.209431	-0.741724	-1.29087	0.731624	-0.237535	-0.386688	0.0351064	0.530121	-1.69795	-0.353074	-0.264791	0.872773	0.695025	1.30851	1.13591	0.313481	1.29131	-	+	STIC_Epithelium PAX8 pos	-	Anchoring of the basal body to the plasma membrane;AURKA Activation by TPX2;Loss of Nlp from mitotic centrosomes;Loss of proteins required for interphase microtubule organization from the centrosome;Recruitment of mitotic centrosome proteins and complexes;Recruitment of NuMA to mitotic centrosomes;Regulation of PLK1 Activity at G2/M Transition	-	-	-	-	+	2.445	0.00962038	0.723383	3.78216	2.08528	0.00278826	Q9BT25	Q9BT25	HAUS8_HUMAN	HAUS augmin-like complex subunit 8	C (7)		2895	3637
CLCN6	C1	-1.0455	-0.0850375	0.340425	-0.92372	0.283176	0.0775779	0.293611	-0.390625	0.470925	-2.60732	0.892186	-1.56221	0.288214	0.648806	0.741794	1.68501	0.277233	0.615454	-	-	-	-	Signaling by BRAF and RAF fusions;Stimuli-sensing channels	-	-	-	-	+	1.15237	0.114401	0.792446	2.02484	1.06197	0.0276246	P51797	P51797	CLCN6_HUMAN	H(+)/Cl(-) exchange transporter 6	C (7)		2896	1391
PRIM2	C1	-0.0341182	0.349865	-0.740074	-1.10623	0.171751	-1.66906	-0.152989	0.180497	0.588692	-1.87604	0.0465042	-1.46729	0.666958	1.2415	1.61737	0.845861	0.695858	0.640941	-	+	STIC_Epithelium PAX8 pos	HALLMARK_E2F_TARGETS;HALLMARK_G2M_CHECKPOINT	Activation of the pre-replicative complex;DNA replication initiation;Inhibition of replication initiation of damaged DNA by RB1/E2F1;Polymerase switching;Polymerase switching on the C-strand of the telomere;Processive synthesis on the lagging strand;Removal of the Flap Intermediate;Telomere C-strand synthesis initiation	WP_DNA_REPLICATION;WP_G1_TO_S_CELL_CYCLE_CONTROL;WP_PYRIMIDINE_METABOLISM	-	-	-	+	2.03643	0.0194106	0.961413	3.2187	2.12878	0.00197196	P49643	P49643	PRI2_HUMAN	DNA primase large subunit	C (7)		2897	1327
GPATCH11	C1	-0.0145736	0.465501	-0.309816	-0.87751	-0.681578	-0.012652	-1.77004	0.204619	1.02031	-1.45068	0.882378	-1.61054	0.902761	0.535535	0.985693	0.782885	-0.671613	1.61932	-	-	-	-	-	-	-	-	-	+	1.03717	0.144799	0.747019	1.86474	0.989713	0.0345578	Q8N954	Q8N954	GPT11_HUMAN	G patch domain-containing protein 11	C (7)		2898	2892
SLU7	C1	0.985244	0.0072751	-1.07755	-0.895708	-1.64781	0.0558573	-1.00443	0.702831	0.887105	-2.04439	0.750794	-1.04985	0.839306	0.736879	0.778673	0.74564	0.463606	0.766527	-	-	-	-	Cleavage of Growing Transcript in the Termination Region;mRNA 3'-end processing;mRNA Splicing - Major Pathway;Transport of Mature mRNA derived from an Intron-Containing Transcript	-	-	-	-	+	1.13591	0.118697	0.923944	2.00213	1.06573	0.0220554	O95391	O95391	SLU7_HUMAN	Pre-mRNA-splicing factor SLU7	C (7)		2899	545
NOP9	C1	-0.64241	-0.926166	-1.28873	-0.259514	-0.621393	-0.850277	0.227978	-0.0284703	0.339678	-1.05982	0.293329	0.453933	1.0854	1.21108	-1.6283	0.282165	1.46723	1.94429	-	-	-	-	-	-	-	-	-	+	0.59578	0.352681	0.364902	1.21126	1.62847	0.0082757	Q86U38	Q86U38	NOP9_HUMAN	Nucleolar protein 9	C (7)		2900	2658
ATXN3	C1	-0.854973	-0.903382	-1.94654	-0.741539	-0.818045	-0.327216	0.379788	0.236882	0.244419	-0.219017	0.557838	0.385081	0.607573	1.36777	-1.60597	1.00021	0.948734	1.68839	-	-	-	-	Josephin domain DUBs	-	-	-	-	+	0.365964	0.540961	0.201209	0.821407	2.18402	0.00267618	P54252	P54252	ATX3_HUMAN	Ataxin-3	C (7)		2901	1439
RIOX2	C1	-0.318691	-0.759024	-1.51972	-1.03687	-0.531526	-0.663375	0.0846639	0.40363	0.427377	0.11268	0.342818	0.327164	0.885266	-0.110315	-1.6554	0.22077	1.24106	2.54949	-	-	-	-	HDMs demethylate histones	-	-	-	-	+	0.161526	0.774894	0.105802	0.411475	1.41832	0.0163809	Q8IUF8	Q8IUF8	RIOX2_HUMAN	Ribosomal oxygenase 2	C (7)		2902	2718
DDX18	C1	-0.551412	-1.03838	-1.49139	-0.743062	-1.01488	-1.21184	-0.173164	0.443656	0.594031	0.174201	0.51475	0.109314	0.391093	0.729052	-1.2998	1.53412	1.26529	1.76844	-	-	-	HALLMARK_MYC_TARGETS_V1;HALLMARK_MYC_TARGETS_V2	-	-	-	-	-	+	0.445892	0.466378	0.223696	0.963147	2.78598	0.000805393	Q9NVP1	Q9NVP1	DDX18_HUMAN	ATP-dependent RNA helicase DDX18	C (7)		2903	4125
PUM3	C1	-0.746017	-0.927344	-1.20451	-1.35229	-1.18627	-1.26874	0.41618	0.391213	0.732079	0.271718	0.233108	0.670879	0.627188	0.858529	-1.30112	1.13626	0.990498	1.65864	-	-	-	-	-	-	-	-	-	+	0.198131	0.728867	0.119555	0.491505	3.56164	0.000146045	Q15397	Q15397	PUM3_HUMAN	Pumilio homolog 3	C (7)		2904	2070
CCDC6	C1	-0.806958	-0.849857	-1.21207	-0.857941	-1.30984	-1.20401	0.056048	0.291267	0.496216	0.649429	0.379576	0.427271	0.70422	1.11223	-1.57806	1.4399	0.733022	1.52957	-	-	-	HALLMARK_ESTROGEN_RESPONSE_EARLY;HALLMARK_ESTROGEN_RESPONSE_LATE;HALLMARK_UV_RESPONSE_UP	RAF/MAP kinase cascade;RET signaling	WP_16P112_PROXIMAL_DELETION_SYNDROME;WP_MESODERMAL_COMMITMENT_PATHWAY;WP_RETINOBLASTOMA_GENE_IN_CANCER	-	-	-	+	0.238111	0.680314	0.20386	0.575076	2.87201	0.000338983	Q16204	Q16204	CCDC6_HUMAN	Coiled-coil domain-containing protein 6	C (7)		2905	2116
GART	C1	-0.439502	-0.834634	-1.65537	-0.906111	-1.37018	-0.915825	0.11809	0.118903	0.646535	0.488962	0.197786	0.39072	0.763912	1.32508	-1.42805	1.63573	0.645319	1.21864	-	-	-	HALLMARK_XENOBIOTIC_METABOLISM	Purine ribonucleoside monophosphate biosynthesis	WP_DISORDERS_OF_FOLATE_METABOLISM_AND_TRANSPORT;WP_FOLATE_METABOLISM;WP_METABOLIC_REPROGRAMMING_IN_COLON_CANCER;WP_ONECARBON_METABOLISM;WP_PURINE_METABOLISM_AND_RELATED_DISORDERS	+	FDA approved drug targets	21	+	0.354049	0.553381	0.16481	0.79957	2.78562	0.000954113	P22102	P22102	PUR2_HUMAN	Trifunctional purine biosynthetic protein adenosine-3	C (7)		2906	973
TRUB1	C1	-0.0130584	-0.448109	-1.21691	-0.775544	-1.52689	-1.05602	-0.249837	-0.0409509	0.392119	0.583073	0.581394	0.194092	-0.214869	1.14416	-1.31933	1.24049	0.366648	2.35954	-	-	-	-	-	-	-	-	-	+	0.276473	0.636336	0.146304	0.652023	1.63685	0.0109667	Q8WWH5	Q8WWH5	TRUB1_HUMAN	Pseudouridylate synthase TRUB1	C (7)		2907	3104
IFITM3	C1	-1.44754	-0.451163	-1.39214	-0.731732	-0.530004	-0.744979	-0.111345	0.618303	-0.424008	0.44246	-0.142754	-0.277035	2.23747	0.480514	-0.917006	1.03981	0.627346	1.7238	Secretory_1;Secretory_2;Unclassified _1	-	-	HALLMARK_APOPTOSIS;HALLMARK_IL2_STAT5_SIGNALING;HALLMARK_INTERFERON_ALPHA_RESPONSE;HALLMARK_INTERFERON_GAMMA_RESPONSE	Interferon alpha/beta signaling	WP_HOSTPATHOGEN_INTERACTION_OF_HUMAN_CORONAVIRUSES_MAPK_SIGNALING;WP_NETWORK_MAP_OF_SARSCOV2_SIGNALING_PATHWAY	-	-	-	+	0.968577	0.166185	0.774619	1.76798	2.52595	0.000566699	Q01628	Q01628;Q01629;P13164	IFM3_HUMAN	Interferon-induced transmembrane protein 3	C (7)	+	2908	1698
GDI2	C1	-0.978629	-0.502817	-0.976677	-0.972402	-0.273266	-0.558819	-0.102835	0.0427776	-0.424927	0.0738896	-0.257492	-0.234059	1.56173	0.0995076	-1.09012	1.62697	0.366184	2.60098	Unclassified_3	-	-	-	Neutrophil degranulation;RAB GEFs exchange GTP for GDP on RABs;Rho GTPase cycle	-	-	-	-	+	1.02994	0.14686	0.463447	1.8546	1.93363	0.00514574	P50395	P50395	GDIB_HUMAN	Rab GDP dissociation inhibitor beta	C (7)		2909	1357
IMPDH1	C1	-1.34211	-0.755906	-0.379181	-0.484348	-1.12733	0.00487782	0.0480977	0.0171252	0.13546	-0.0880369	-0.247951	-0.866202	1.29641	0.931231	-1.454	1.99847	0.521931	1.79146	-	-	-	-	Neutrophil degranulation;Purine ribonucleoside monophosphate biosynthesis	WP_PURINE_METABOLISM;WP_PURINE_METABOLISM_AND_RELATED_DISORDERS	+	Disease variant, FDA approved drug targets, Leber congenital amaurosis, Retinitis pigmentosa	7	+	1.06657	0.137104	0.699439	1.90586	1.8133	0.00402774	P20839	P20839	IMDH1_HUMAN	Inosine-5'-monophosphate dehydrogenase 1	C (7)		2910	953
ARHGEF1	C1	-0.982783	-0.604218	-0.850757	-1.32791	-0.307522	-1.17945	0.12019	0.525949	0.207288	0.274464	0.362708	0.335571	1.12473	-0.939228	-0.2218	0.103592	0.415953	2.94323	-	-	-	-	G alpha (12/13) signalling events;NRAGE signals death through JNK;Rho GTPase cycle	WP_EGFEGFR_SIGNALING_PATHWAY;WP_G_PROTEIN_SIGNALING_PATHWAYS;WP_G13_SIGNALING_PATHWAY;WP_REGULATION_OF_ACTIN_CYTOSKELETON	-	-	-	+	0.193727	0.73484	0.135361	0.482065	1.76472	0.00638869	Q92888	Q92888	ARHG1_HUMAN	Rho guanine nucleotide exchange factor 1	C (7)		2911	3182
DNAJC13	C1	-1.25712	-0.150632	-1.01448	-0.674646	-1.05292	-1.06252	0.297715	0.317879	-0.537851	0.242283	0.289357	0.148519	1.15455	-0.898865	0.117095	0.608498	0.624058	2.84908	-	-	-	-	Neutrophil degranulation	-	-	-	-	+	0.572048	0.36766	0.150585	1.17324	2.04658	0.0124266	O75165	O75165	DJC13_HUMAN	DnaJ homolog subfamily C member 13	C (7)		2912	393
SUV39H2	C1	-0.806295	-0.393417	-0.734169	-1.5746	-0.661579	-1.06467	-0.0182822	-0.0482505	0.136333	-0.177865	0.338872	0.0833172	1.37057	-0.18769	-0.210834	1.27117	-0.122929	2.80032	-	-	-	-	PKMTs methylate histone lysines	WP_CIRCADIAN_RHYTHM_GENES;WP_HISTONE_MODIFICATIONS	-	-	-	+	0.804078	0.235094	0.818684	1.53002	2.3036	0.000800361	Q9H5I1	Q9H5I1	SUV92_HUMAN	Histone-lysine N-methyltransferase SUV39H2	C (7)		2913	3876
DTX3L	C1	-0.266991	-0.872979	-1.42766	-1.26661	-0.4362	-0.0766976	0.22084	0.738416	-0.304103	-0.213971	-0.40422	0.153501	1.12304	-1.25825	-0.505384	1.70331	0.989599	2.10436	-	-	-	-	Antigen processing: Ubiquitination & Proteasome degradation	WP_NOTCH_SIGNALING	-	-	-	+	0.575177	0.365829	0.299971	1.17828	1.42839	0.0156025	Q8TDB6	Q8TDB6	DTX3L_HUMAN	E3 ubiquitin-protein ligase DTX3L	C (7)		2914	3028
RCL1	C1	-0.656054	-0.549081	-2.9128	-0.483221	-0.875623	-0.425683	-0.0302008	0.0428456	0.6583	0.128243	0.52582	0.27631	1.07886	1.21594	-0.684298	0.567706	0.826431	1.29651	-	-	-	HALLMARK_HEME_METABOLISM;HALLMARK_MYC_TARGETS_V2	Major pathway of rRNA processing in the nucleolus and cytosol;rRNA modification in the nucleus and cytosol	-	-	-	-	+	0.718341	0.277683	0.28628	1.40169	2.58696	0.000784065	Q9Y2P8	Q9Y2P8	RCL1_HUMAN	RNA 3'-terminal phosphate cyclase-like protein	C (7)		2915	4501
UTP6	C1	-0.483474	-0.829708	-2.66643	-0.434847	-0.617086	-0.749973	-0.0805282	0.281123	0.673152	0.288572	0.753272	0.541077	1.09201	1.4249	-1.08929	-0.0719353	0.975616	0.993558	-	-	-	-	Major pathway of rRNA processing in the nucleolus and cytosol;rRNA modification in the nucleus and cytosol	-	-	-	-	+	0.13665	0.809373	0.0840699	0.354885	2.22695	0.00198183	Q9NYH9	Q9NYH9	UTP6_HUMAN	U3 small nucleolar RNA-associated protein 6 homolog	C (7)		2916	4177
METTL1	C1	-0.352491	-0.652368	-2.63901	-0.547829	-1.79711	0.0687883	-0.0319833	0.440203	0.810504	0.203422	0.285547	0.544148	0.282742	1.56641	-0.106723	-0.0197626	0.624359	1.32115	-	-	-	-	tRNA modification in the nucleus and cytosol	-	-	-	-	+	0.334897	0.573408	0.187177	0.764039	2.42634	0.000825056	Q9UBP6	Q9UBP6	TRMB_HUMAN	tRNA (guanine-N(7)-)-methyltransferase	C (7)		2917	4275
TOE1	C1	-0.550718	-0.135052	-2.41629	-0.748254	-1.68903	-0.105222	-0.223513	-0.670627	0.736087	-0.151058	0.813106	0.530183	0.710812	0.811869	-0.375889	0.90906	1.36326	1.19127	-	-	-	-	-	-	-	-	-	+	0.91971	0.184171	0.255416	1.69825	2.46786	0.00198563	Q96GM8	Q96GM8	TOE1_HUMAN	Target of EGR1 protein 1	C (7)		2918	3348
TMEM214	C1	0.418373	-0.246009	-2.44084	-1.59302	-1.37781	0.311219	0.414836	0.461344	0.687526	-0.0616246	0.11165	-0.120415	1.6196	0.0672415	-0.46662	-0.0356749	1.18452	1.0657	-	-	-	-	-	-	-	-	-	+	0.405974	0.500627	0.116824	0.893336	1.53415	0.0165449	Q6NUQ4	Q6NUQ4	TM214_HUMAN	Transmembrane protein 214	C (7)		2919	2449
GTPBP10	C1	-0.663714	-0.0494032	-2.22814	0.54872	-0.139751	0.560638	0.341517	-0.884238	0.336882	-0.632047	-0.748078	-0.747297	1.16813	0.848697	-0.516924	-0.160504	0.573627	2.39188	-	-	-	-	-	-	-	-	-	+	1.35162	0.0756746	0.482594	2.29672	1.03927	0.0426494	A4D1E9	A4D1E9	GTPBA_HUMAN	GTP-binding protein 10	C (7)		2920	18
UXT	C1	-0.836933	-1.58177	-0.626422	-0.485889	-0.290411	-1.97667	-0.112859	0.627052	-0.854734	0.921836	0.466157	0.982859	-0.00293438	1.32764	0.234808	0.137154	0.0289478	2.04217	-	-	-	HALLMARK_MITOTIC_SPINDLE	Transcriptional Regulation by E2F6	-	-	-	-	+	0.270841	0.64231	0.0812931	0.640908	2.31808	0.00600244	Q9UBK9	Q9UBK9	UXT_HUMAN	Protein UXT	C (7)		2921	4272
FAM107A	C1	-1.56231	-1.19127	-0.829609	-0.214321	-0.99145	-1.67	0.690802	0.783185	0.241124	0.608481	1.01158	0.638553	-0.0145638	1.35792	-0.160703	-0.872278	0.500861	1.674	Secretory_3	-	-	-	-	-	-	-	-	+	0.255005	0.661224	-0.217371	-0.609327	3.18924	0.000146143	O95990	O95990	F107A_HUMAN	Actin-associated protein FAM107A	C (7)		2922	596
COX20	C1	-2.21597	-0.616873	-0.00702956	-0.738233	-0.835691	-1.33102	0.317882	-0.0119206	-0.165151	-0.0212046	-0.0821874	0.382288	0.403815	0.891346	0.0939557	0.734723	0.656752	2.54452	-	-	-	-	Respiratory electron transport;TP53 Regulates Metabolic Genes	WP_MITOCHONDRIAL_COMPLEX_IV_ASSEMBLY	-	-	-	+	1.32188	0.0803798	0.530685	2.25643	3.01147	0.000313159	Q5RI15	Q5RI15	COX20_HUMAN	Cytochrome c oxidase assembly protein COX20, mitochondrial	C (7)		2923	2295
VCL	C1	-1.53232	-0.720862	-0.838814	-0.951101	-0.523646	-1.76221	0.50744	0.407139	-0.041262	0.806845	0.42142	0.477591	0.911216	0.58363	-0.490031	0.880635	-0.435039	2.29937	Secretory_3	-	-	HALLMARK_APICAL_JUNCTION;HALLMARK_MITOTIC_SPINDLE	MAP2K and MAPK activation;Neutrophil degranulation;Paradoxical activation of RAF signaling by kinase inactive BRAF;Platelet degranulation;Signaling by BRAF and RAF fusions;Signaling by high-kinase activity BRAF mutants;Signaling by moderate kinase activity BRAF mutants;Signaling by RAS mutants;Smooth Muscle Contraction	WP_FOCAL_ADHESION;WP_INTEGRINMEDIATED_CELL_ADHESION;WP_MELANOMA;WP_MFAP5_EFFECT_ON_PERMEABILITY_AND_MOTILITY_OF_ENDOTHELIAL_CELLS_VIA_CYTOSKELETON_REARRANGEMENT;WP_PRIMARY_FOCAL_SEGMENTAL_GLOMERULOSCLEROSIS_FSGS;WP_REGULATION_OF_ACTIN_CYTOSKELETON;WP_VEGFAVEGFR2_SIGNALING	-	-	-	+	0.177976	0.754717	0.0930783	0.44789	2.95029	0.000612011	P18206	P18206	VINC_HUMAN	Vinculin	C (7)		2924	912
GLS	C1	-1.58174	0.279615	-0.0550825	-0.499527	-1.12055	-1.57996	0.040127	1.07171	-0.0362871	0.347842	-0.378271	0.537038	-0.37584	1.94332	-0.65131	-0.147995	0.125607	2.0813	Secretory_3	-	-	HALLMARK_UV_RESPONSE_UP	Amino acid synthesis and interconversion (transamination);Glutamate Neurotransmitter Release Cycle;TP53 Regulates Metabolic Genes	WP_AMINO_ACID_METABOLISM;WP_AMINO_ACID_METABOLISM_IN_TRIPLENEGATIVE_BREAST_CANCER_CELLS;WP_GABA_METABOLISM_AKA_GHB;WP_METABOLIC_REPROGRAMMING_IN_COLON_CANCER;WP_NEUROINFLAMMATION_AND_GLUTAMATERGIC_SIGNALING	-	-	-	+	0.172365	0.762314	0.116924	0.435554	1.23199	0.0223922	O94925	O94925	GLSK_HUMAN	Glutaminase kidney isoform, mitochondrial	C (7)		2925	506
SF3B4	C1	-0.431586	-0.834144	-1.47488	-0.363384	-0.973836	-0.774755	-0.566024	-0.265334	-0.104885	-0.0689291	0.258624	-0.0036982	-0.140188	0.775939	0.561581	0.305865	0.964821	3.13481	-	-	-	-	mRNA Splicing - Major Pathway;mRNA Splicing - Minor Pathway	WP_MRNA_PROCESSING	-	-	-	+	1.28185	0.0872424	0.565836	2.20207	2.55875	0.00109397	Q15427	Q15427	SF3B4_HUMAN	Splicing factor 3B subunit 4	C (7)		2926	2071
HDLBP	C1	-0.369067	-0.866015	-1.11693	-0.476126	-0.748911	-0.897031	-0.0132372	0.0729574	-0.302787	-0.0158961	-0.323873	-0.247304	0.910631	0.579187	0.260494	-0.379975	0.571248	3.36263	-	-	-	HALLMARK_GLYCOLYSIS;HALLMARK_HYPOXIA	HDL clearance	WP_2Q37_COPY_NUMBER_VARIATION_SYNDROME	-	-	-	+	1.07968	0.133273	0.290435	1.92413	2.12269	0.00813007	Q00341	Q00341	VIGLN_HUMAN	Vigilin	C (7)		2927	1674
PRKCI	C1	-0.775182	-0.58594	-1.28839	-0.231245	-0.789589	-0.479891	-0.37028	0.141772	-0.395138	0.650695	0.237139	0.301745	-0.159098	0.678058	-0.424443	-0.289439	0.354307	3.42491	-	-	-	-	p75NTR recruits signalling complexes;Pre-NOTCH Transcription and Translation;Tight junction interactions	WP_CHRONIC_HYPERGLYCEMIA_IMPAIRMENT_OF_NEURON_FUNCTION;WP_COMPLEMENT_SYSTEM_IN_NEURONAL_DEVELOPMENT_AND_PLASTICITY;WP_CORTICOTROPINRELEASING_HORMONE_SIGNALING_PATHWAY;WP_EGFEGFR_SIGNALING_PATHWAY;WP_G_PROTEIN_SIGNALING_PATHWAYS;WP_GLIOBLASTOMA_SIGNALING_PATHWAYS;WP_HIPPO_SIGNALING_REGULATION_PATHWAYS;WP_INSULIN_SIGNALING;WP_OSTEOBLAST_DIFFERENTIATION_AND_RELATED_DISEASES;WP_VEGFAVEGFR2_SIGNALING;…	+	Cancer-related genes, FDA approved drug targets, Proto-oncogene, Tumor suppressor	3	+	0.365135	0.541634	0.298105	0.819893	1.15229	0.0236308	P41743	Q05513;P41743	KPCI_HUMAN	Protein kinase C iota type	C (7)		2928	1225
DNTTIP1	C1	-0.670695	-0.65647	-1.48267	-0.0104542	-0.181337	-1.86	-0.760679	0.730186	0.929865	-0.078379	0.535609	0.231866	0.432696	0.369919	-0.303323	0.151174	-0.142419	2.76511	-	-	-	-	-	-	-	-	-	+	0.219358	0.704128	0.0697616	0.536337	1.46126	0.0343799	Q9H147	Q9H147	TDIF1_HUMAN	Deoxynucleotidyltransferase terminal-interacting protein 1	C (7)		2929	3813
C1orf198	C1	-0.752417	-0.823157	-1.2171	-0.782442	-0.570257	-0.0277756	-0.0816581	0.245191	-0.100559	-0.371995	0.00448563	-0.190345	-0.0245812	0.664016	-0.64652	0.851212	0.464528	3.35937	-	-	-	-	-	-	-	-	-	+	0.794649	0.238829	0.408464	1.51607	1.59282	0.0101024	Q9H425	Q9H425	CA198_HUMAN	Uncharacterized protein C1orf198	C (7)		2930	3856
SEC23A	C1	-0.917592	-0.432718	-0.470063	-0.434188	-0.719521	-1.06354	-0.215216	0.321578	-0.210153	-0.297111	-0.47898	-0.0982418	-0.587703	0.9523	0.143245	1.17923	0.0537758	3.2749	Unclassified _1	-	-	-	Antigen PresentatioFolding, assembly and peptide loading of class I MHC;Cargo concentration in the ER;COPII (Coat Protein 2) Mediated Vesicle Transport;MHC class II antigen presentation;Regulation of cholesterol biosynthesis by SREBP (SREBF)	WP_STEROL_REGULATORY_ELEMENTBINDING_PROTEINS_SREBP_SIGNALING	-	-	-	+	0.969749	0.16582	0.358882	1.76965	1.75108	0.0106558	Q15436	Q15436	SC23A_HUMAN	Protein transport protein Sec23A	C (7)		2931	2075
QTRT2	C1	-0.978904	-1.28042	-0.482914	-0.594246	-0.92499	-0.51233	-0.239077	0.155052	0.146871	0.378494	-0.03101	0.687247	0.0776855	1.32856	-1.02839	0.810422	-0.398909	2.88686	-	-	-	-	tRNA modification in the nucleus and cytosol	-	-	-	-	+	0.319702	0.589739	0.150646	0.735451	1.49323	0.0190137	Q9H974	Q9H974	QTRT2_HUMAN	Queuine tRNA-ribosyltransferase accessory subunit 2	C (7)		2932	3922
FARSA	C1	-0.455261	-0.838562	-1.51227	-1.00439	-1.69959	-1.02663	1.02039	-0.16171	0.860034	0.791793	0.920159	0.761272	0.0202334	0.944682	-0.144074	-0.319416	-0.145216	1.98856	-	-	-	HALLMARK_MYC_TARGETS_V2	Cytosolic tRNA aminoacylation	-	-	-	-	+	0.329347	0.579607	-0.130336	-0.753639	3.37407	0.000381356	Q9Y285	Q9Y285	SYFA_HUMAN	Phenylalanine--tRNA ligase alpha subunit	C (7)		2933	4481
FARSB	C1	-0.393507	-0.7279	-1.88916	-1.02872	-1.56355	-0.903243	1.27525	-0.243213	0.909879	0.680318	0.813522	0.652372	0.0577955	0.930418	-0.12047	-0.169183	-0.133716	1.85311	-	-	-	-	Cytosolic tRNA aminoacylation	WP_AMINO_ACID_METABOLISM;WP_VEGFAVEGFR2_SIGNALING	-	-	-	+	0.304092	0.606261	-0.126224	-0.705696	3.29318	0.00037155	Q9NSD9	Q9NSD9	SYFB_HUMAN	Phenylalanine--tRNA ligase beta subunit	C (7)		2934	4074
NAXE	C1	-0.843415	-0.501473	-1.42427	-1.15356	-1.46985	-1.05329	0.900143	0.211739	1.08173	0.769464	0.364019	-0.137769	0.317623	1.03231	0.612019	-0.896278	0.122062	2.0688	-	-	-	-	Nicotinamide salvaging	-	-	-	-	+	0.00858774	0.989001	0.00702874	0.0251627	3.0757	0.000288288	Q8NCW5	Q8NCW5	NNRE_HUMAN	NAD(P)H-hydrate epimerase	C (7)		2935	2934
AIMP2	C1	-0.988453	-0.702011	-1.93828	-0.872028	-2.06578	-0.151171	0.910198	-0.263884	0.668518	0.601826	0.390013	0.0318122	0.30545	1.34805	0.916548	0.29717	0.0926196	1.41939	-	-	-	HALLMARK_MYC_TARGETS_V1;HALLMARK_MYC_TARGETS_V2	Cytosolic tRNA aminoacylation;SeMet incorporation into proteins	WP_NRF2ARE_REGULATION;WP_OSTEOCLAST_SIGNALING;WP_TRANSCRIPTIONAL_ACTIVATION_BY_NRF2_IN_RESPONSE_TO_PHYTOCHEMICALS	-	-	-	+	0.55895	0.377359	0.111568	1.15207	3.75295	0.000418314	Q13155	Q13155	AIMP2_HUMAN	Aminoacyl tRNA synthase complex-interacting multifunctional protein 2	C (7)		2936	1855
EPRS1	C1	-0.775189	-0.751364	-1.21067	-0.807545	-1.4004	-0.866206	0.166247	-0.46605	0.26867	0.241756	0.378926	0.538789	0.417075	1.00351	0.794754	0.105546	-0.489592	2.85174	-	-	-	HALLMARK_MTORC1_SIGNALING;HALLMARK_MYC_TARGETS_V1	Cytosolic tRNA aminoacylation;SeMet incorporation into proteins;tRNA modification in the nucleus and cytosol	-	-	-	-	+	0.597864	0.3512	0.151777	1.21458	2.66367	0.00431472	P07814	P07814	SYEP_HUMAN	Bifunctional glutamate/proline--tRNA ligase	C (7)		2937	710
ACSS2	C1	-1.18013	0.20634	-1.14422	-1.95005	-0.926718	-0.663052	1.0553	0.365037	1.29649	0.19324	0.879691	-0.167722	0.110208	0.7423	-0.574034	-0.383615	0.0566654	2.08427	-	-	-	HALLMARK_CHOLESTEROL_HOMEOSTASIS	Ethanol oxidation;Transcriptional activation of mitochondrial biogenesis	WP_ETHANOL_EFFECTS_ON_HISTONE_MODIFICATIONS;WP_FATTY_ACID_BETAOXIDATION;WP_FATTY_ACID_BIOSYNTHESIS;WP_FLUOROACETIC_ACID_TOXICITY;WP_LIPID_METABOLISM_PATHWAY	-	-	-	+	0.239523	0.678265	-0.086187	-0.577962	2.14935	0.00596884	Q9NR19	Q9NR19	ACSA_HUMAN	Acetyl-coenzyme A synthetase, cytoplasmic	C (7)		2938	4035
EDEM3	C1	0.157844	-1.80929	-1.43896	0.0606799	-0.368654	0.116563	0.00723733	0.022271	-2.42167	0.387323	-0.112125	0.222941	0.214656	0.815224	0.719894	0.83822	1.04852	1.53933	-	-	-	-	ER Quality Control Compartment (ERQC)	-	-	-	-	+	1.53825	0.051435	0.885605	2.54813	1.68238	0.00503099	Q9BZQ6	Q9BZQ6	EDEM3_HUMAN	ER degradation-enhancing alpha-mannosidase-like protein 3	C (7)		2939	3746
DAPK3	C1	-1.025	-1.65677	-0.850145	-0.670972	0.216484	-0.883061	0.454894	0.493265	-1.44955	0.884106	-1.44644	0.60877	0.772231	0.307268	1.4101	1.12915	0.863653	0.842012	-	-	-	-	Ligand-independent caspase activation via DCC	WP_BLADDER_CANCER	-	-	-	+	1.19108	0.105802	1.08899	2.07808	2.33973	0.000690487	O43293	O43293	DAPK3_HUMAN	Death-associated protein kinase 3	C (7)		2940	267
PIGU	C1	0.329901	-0.374205	-1.20415	-1.95282	-0.16364	0.0224707	-0.321809	0.691711	-1.97096	-0.0811281	-0.676009	0.102736	0.258454	1.2903	1.44331	1.39793	0.706553	0.50136	-	+	STIC_Epithelium PAX8 pos	-	Attachment of GPI anchor to uPAR	-	-	-	-	+	1.93995	0.0236953	0.713201	3.088	2.04723	0.00314207	Q9H490	Q9H490	PIGU_HUMAN	Phosphatidylinositol glycan anchor biosynthesis class U protein	C (7)		2941	3862
UBN2	C1	0.80291	-0.505759	-0.810489	-0.94085	0.071696	-0.117136	-0.0460892	0.592656	-2.17811	0.434256	-1.20201	-0.880248	-0.502344	0.956097	0.205014	1.58453	1.04632	1.48956	-	-	-	-	-	-	-	-	-	+	1.47305	0.0587867	1.17567	2.46051	1.41027	0.00877847	Q6ZU65	Q6ZU65	UBN2_HUMAN	Ubinuclein-2	C (7)		2942	2558
TOMM7	C1	-1.47129	-0.186822	-1.54465	0.764319	-0.981635	-0.481805	0.553538	-0.349862	-1.55556	0.00419479	-0.0486221	0.325966	0.161528	1.84669	0.310551	0.809146	-0.0236416	1.86795	-	-	-	-	Mitochondrial protein import;Pink/Parkin Mediated Mitophagy	-	-	-	-	+	1.27566	0.0885367	0.5919	2.19365	1.67952	0.00648756	Q9P0U1	Q9P0U1	TOM7_HUMAN	Mitochondrial import receptor subunit TOM7 homolog	C (7)		2943	4222
SDE2	C1	-0.725621	0.73107	-1.6741	-0.25523	-1.33238	0.84038	0.140906	0.416413	-1.85947	-0.412832	-0.348601	-0.268207	-0.480407	0.875608	1.09966	1.25321	0.367939	1.63167	-	+	STIC_Epithelium PAX8 pos	-	-	-	-	-	-	+	1.61759	0.0445325	0.713528	2.6546	1.3118	0.0152906	Q6IQ49	Q6IQ49	SDE2_HUMAN	Splicing regulator SDE2	C (7)		2944	2435
RHEB	C1	-0.76154	-0.641904	-0.924287	-0.961857	-1.06127	-1.15924	1.42828	-0.349935	-0.219157	-0.294562	-0.565978	-0.428703	0.771204	0.302053	1.65167	1.75757	-0.105316	1.56298	Unclassified_3	-	-	-	Energy dependent regulation of mTOR by LKB1-AMPK;Macroautophagy;mTOR signalling;mTORC1-mediated signalling;Regulation of PTEN gene transcription;TP53 Regulates Metabolic Genes	WP_ANGIOPOIETINLIKE_PROTEIN_8_REGULATORY_PATHWAY;WP_BDNFTRKB_SIGNALING;WP_CLEAR_CELL_RENAL_CELL_CARCINOMA_PATHWAYS;WP_FOCAL_ADHESION_PI3KAKTMTORSIGNALING_PATHWAY;WP_FOLLICLE_STIMULATING_HORMONE_FSH_SIGNALING_PATHWAY;WP_FRAGILE_X_SYNDROME;WP_HEAD_AND_NECK_SQUAMOUS_CELL_CARCINOMA;WP_INSULIN_SIGNALING;WP_JOUBERT_SYNDROME;WP_MALIGNANT_PLEURAL_MESOTHELIOMA;WP_NETWORK_MAP_OF_SARSCOV2_SIGNALING_PATHWAY;…	-	-	-	+	1.43179	0.0637665	0.632967	2.40496	3.37703	0.000199747	Q15382	Q15382	RHEB_HUMAN	GTP-binding protein Rheb	C (7)		2945	2065
YKT6	C1	-1.47898	-0.328271	-0.447697	-0.640474	-1.29257	-1.42319	0.872151	-0.0972091	-0.34617	-0.218005	-0.114274	-0.149281	0.252671	0.486456	1.3597	1.48681	-0.166157	2.24449	-	-	-	HALLMARK_MTORC1_SIGNALING;HALLMARK_PROTEIN_SECRETION;HALLMARK_UV_RESPONSE_UP	COPII (Coat Protein 2) Mediated Vesicle Transport;COPI-mediated anterograde transport;Intra-Golgi traffic	-	-	-	-	+	1.37038	0.0727517	0.493535	2.32209	3.17936	0.000343852	O15498	O15498	YKT6_HUMAN	Synaptobrevin homolog YKT6	C (7)		2946	248
PRIM1	C1	-1.13046	-0.260565	-0.722354	-0.0461233	-0.776459	-1.1602	0.559727	-0.38868	-0.576661	-0.977072	-0.373794	-1.36109	0.75759	1.2095	1.5977	1.48678	0.69377	1.46839	-	+	STIC_Epithelium PAX8 pos	HALLMARK_DNA_REPAIR	Activation of the pre-replicative complex;DNA replication initiation;Inhibition of replication initiation of damaged DNA by RB1/E2F1;Polymerase switching;Polymerase switching on the C-strand of the telomere;Processive synthesis on the lagging strand;Removal of the Flap Intermediate;Telomere C-strand synthesis initiation	WP_DNA_REPLICATION;WP_G1_TO_S_CELL_CYCLE_CONTROL;WP_PYRIMIDINE_METABOLISM;WP_RETINOBLASTOMA_GENE_IN_CANCER	-	-	-	+	3.61194	0.00140385	1.3887	5.54919	4.78641	5.71e-06	P49642	P49642	PRI1_HUMAN	DNA primase small subunit	C (7)		2947	1326
CHD8	C1	-1.24196	0.0141192	-0.213808	-1.44138	-1.06647	0.112953	0.617628	-0.377649	-0.936739	-0.339101	-0.955373	0.093716	-0.0099246	0.750751	1.98487	1.87752	-0.168715	1.29957	-	+	STIC_Epithelium PAX8 pos	-	Deactivation of the beta-catenin transactivating complex	WP_LNCRNA_IN_CANONICAL_WNT_SIGNALING_AND_COLORECTAL_CANCER;WP_MALIGNANT_PLEURAL_MESOTHELIOMA;WP_NCRNAS_INVOLVED_IN_WNT_SIGNALING_IN_HEPATOCELLULAR_CARCINOMA;WP_WNT_SIGNALING	-	-	-	+	1.74073	0.0350701	0.412378	2.81981	2.27047	0.00487699	Q9HCK8	Q9HCK8	CHD8_HUMAN	Chromodomain-helicase-DNA-binding protein 8	C (7)		2948	3978
TMEM167A	C1	-0.501869	-0.0844236	-0.732857	-0.600121	-0.920712	-0.643457	1.09668	-0.320716	-1.55674	0.221579	-1.31896	-0.277702	-0.172106	1.07053	1.83499	1.37691	-0.0660287	1.59501	-	-	-	-	-	-	-	-	-	+	1.45762	0.0607419	0.636922	2.43974	2.10696	0.00320329	Q8TBQ9	Q8TBQ9	KISHA_HUMAN	Protein kish-A	C (7)		2949	3006
CHMP4B	C1	-0.558135	-0.617955	-1.21226	-0.82988	0.269863	-0.312835	-0.0301944	0.501444	-0.361628	-0.317607	-0.959462	-0.33787	-0.173337	0.65924	1.35206	2.14469	-1.22968	2.01355	-	-	-	-	Budding and maturation of HIV virion;Endosomal Sorting Complex Required For Transport (ESCRT);Macroautophagy	-	-	-	-	+	1.01078	0.152973	0.32023	1.82766	1.39928	0.0280215	Q9H444	Q9H444;Q96CF2	CHM4B_HUMAN	Charged multivesicular body protein 4b	C (7)		2950	3857
DHX8	C1	-0.70917	-0.681753	-1.31706	-0.313467	-0.221936	-0.947965	-0.127625	0.457475	0.283727	-0.213839	-0.0170189	-0.96304	-0.620118	0.24503	2.28532	2.1208	-0.505071	1.24571	-	-	-	-	-	WP_MRNA_PROCESSING	-	-	-	+	0.847297	0.214987	0.177755	1.59349	1.65712	0.0359196	Q14562	Q14562	DHX8_HUMAN	ATP-dependent RNA helicase DHX8	C (7)		2951	1980
MAPRE1	C1	-0.593523	-0.582118	-1.01589	-1.17083	-0.296017	-0.228275	0.288514	-0.217549	-0.649451	-0.254409	-0.757657	-0.415967	0.217289	1.42746	2.20764	2.06375	-0.78098	0.758018	Unclassified_3	+	STIC_Epithelium PAX8 pos	HALLMARK_MITOTIC_SPINDLE	Amplification of signal from unattached kinetochores via a MAD2 inhibitory signal;Anchoring of the basal body to the plasma membrane;AURKA Activation by TPX2;Loss of Nlp from mitotic centrosomes;Loss of proteins required for interphase microtubule organization from the centrosome;Mitotic Prometaphase;Recruitment of mitotic centrosome proteins and complexes;Recruitment of NuMA to mitotic centrosom…	WP_MICROTUBULE_CYTOSKELETON_REGULATION	-	-	-	+	1.62742	0.0437616	0.596815	2.66778	2.44582	0.00188127	Q15691	Q15691	MARE1_HUMAN	Microtubule-associated protein RP/EB family member 1	C (7)		2952	2092
PCNA	C1	-0.188961	-0.270128	-1.31435	-1.06349	-0.714001	-0.449992	0.16425	-0.513278	0.456374	-0.103172	-1.02554	-0.766973	0.528028	0.563624	2.34622	1.76006	-0.652298	1.24363	Unclassified_3	+	STIC_Epithelium PAX8 pos	HALLMARK_DNA_REPAIR;HALLMARK_E2F_TARGETS;HALLMARK_MYC_TARGETS_V1;HALLMARK_P53_PATHWAY	Activation of E2F1 target genes at G1/S;Dual Incision in GG-NER;Dual incision in TC-NER;E3 ubiquitin ligases ubiquitinate target proteins;Gap-filling DNA repair synthesis and ligation in GG-NER;Gap-filling DNA repair synthesis and ligation in TC-NER;HDR through Homologous Recombination (HRR);Mismatch repair (MMR) directed by MSH2:MSH3 (MutSbeta);Mismatch repair (MMR) directed by MSH2:MSH6 (MutSal…	WP_16P112_PROXIMAL_DELETION_SYNDROME;WP_7Q1123_COPY_NUMBER_VARIATION_SYNDROME;WP_BASE_EXCISION_REPAIR;WP_CELL_CYCLE;WP_DNA_IRDAMAGE_AND_CELLULAR_RESPONSE_VIA_ATR;WP_DNA_IRDOUBLE_STRAND_BREAKS_AND_CELLULAR_RESPONSE_VIA_ATM;WP_DNA_MISMATCH_REPAIR;WP_DNA_REPAIR_PATHWAYS_FULL_NETWORK;WP_DNA_REPLICATION;WP_EGFEGFR_SIGNALING_PATHWAY;WP_G1_TO_S_CELL_CYCLE_CONTROL;WP_HEPATITIS_B_INFECTION;WP_NUCLEOTIDE_E…	-	-	-	+	1.56026	0.0495822	0.761526	2.57768	2.36955	0.0013906	P12004	P12004	PCNA_HUMAN	Proliferating cell nuclear antigen	C (7)		2953	814
RABL3	C1	-0.690601	-0.620165	-2.4985	-0.738126	-1.06029	-0.25201	1.05103	0.717976	-0.447995	-0.389197	0.242608	0.208417	0.509877	0.557485	1.79246	0.449021	-0.259014	1.42703	-	-	-	-	-	-	-	-	-	+	0.672033	0.304617	0.165361	1.33081	2.61445	0.00271784	Q5HYI8	Q5HYI8	RABL3_HUMAN	Rab-like protein 3	C (7)		2954	2268
CCNK	C1	-0.0119701	-0.278809	-2.20701	-0.986688	-0.191127	-0.118201	-0.337716	0.230537	0.42333	-0.788914	-0.0377154	0.00778543	-0.593683	0.468438	1.58845	1.12943	-0.603165	2.30703	-	-	-	HALLMARK_P53_PATHWAY	Formation of HIV elongation complex in the absence of HIV Tat;Formation of RNA Pol II elongation complex;HIV elongation arrest and recovery;Pausing and recovery of HIV elongation;RNA Polymerase II Pre-transcription Events;RNA polymerase II transcribes snRNA genes;RNA Polymerase II Transcription Elongation;SMAD2/SMAD3:SMAD4 heterotrimer regulates transcription;TP53 Regulates Transcription of DNA R…	WP_MALE_INFERTILITY	-	-	-	+	0.822985	0.225731	0.229359	1.55788	1.27812	0.0401057	O75909	O75909	CCNK_HUMAN	Cyclin-K	C (7)		2955	467
PFDN2	C1	-0.676076	-0.652084	-1.44208	-0.603539	-0.405725	-1.09902	-0.101773	-0.358578	-0.159506	0.198662	-0.0961276	-0.127237	0.94352	1.60953	1.04998	0.577052	-1.09684	2.43984	-	-	-	-	Prefoldin mediated transfer of substrate to CCT/TriC	WP_CELLULAR_PROTEOSTASIS	-	-	-	+	1.21136	0.101377	0.223832	2.10588	2.50441	0.00804382	Q9UHV9	Q9UHV9	PFD2_HUMAN	Prefoldin subunit 2	C (7)		2956	4330
PFDN6	C1	-0.741924	-0.617344	-1.53714	-0.279356	-0.334882	-0.428498	-0.261392	-0.304401	-0.442533	-0.411832	0.109644	-0.245512	1.03153	1.73484	1.49411	-0.0810324	-1.00871	2.32443	-	-	-	-	Prefoldin mediated transfer of substrate to CCT/TriC	WP_CELLULAR_PROTEOSTASIS	-	-	-	+	1.34723	0.0762706	0.229657	2.29078	2.0797	0.0192348	O15212	O15212	PFD6_HUMAN	Prefoldin subunit 6	C (7)		2957	221
DTYMK	C1	-0.734289	-0.416799	-0.796568	-0.660037	-1.27777	-0.905118	0.0427007	-0.0651516	-0.292064	-0.332339	-0.438312	-0.239132	0.0331689	1.25955	2.17786	0.612927	-0.31554	2.34691	Unclassified_3	+	STIC_Epithelium PAX8 pos	HALLMARK_G2M_CHECKPOINT	Interconversion of nucleotide di- and triphosphates	WP_2Q37_COPY_NUMBER_VARIATION_SYNDROME;WP_PYRIMIDINE_METABOLISM	-	-	-	+	1.66516	0.040566	0.606735	2.71841	3.05681	0.000506507	P23919	P23919	KTHY_HUMAN	Thymidylate kinase	C (7)		2958	1002
AK6	C1	-2.47739	-2.00978	-0.478736	-0.960442	0.461017	0.523496	0.581685	-0.779021	0.874063	0.0706815	0.00397229	0.75329	0.0869855	1.12084	1.09436	0.3233	0.342561	0.469127	-	-	-	-	-	-	-	-	-	+	0.495223	0.425181	0.178769	1.04705	1.54369	0.00948549	Q9Y3D8	Q9Y3D8	KAD6_HUMAN	Adenylate kinase isoenzyme 6	C (7)		2959	4547
BUD13	C1	-2.26014	-1.27185	-0.669302	0.377942	0.695678	0.325892	0.455039	-1.84664	0.546872	-1.15967	0.244066	-0.0492395	0.483778	0.597404	0.974369	1.00517	0.868147	0.682478	-	+	STIC_Epithelium PAX8 pos	-	-	-	-	-	-	+	1.59214	0.0465743	0.827213	2.62045	1.24442	0.0148619	Q9BRD0	Q9BRD0	BUD13_HUMAN	BUD13 homolog	C (7)		2960	3603
GSK3B	C1	-3.53879	-0.101961	-0.345586	0.411296	0.368996	0.531087	0.0776842	0.0180557	-0.611555	-0.315235	-0.111291	-0.358664	0.84464	0.29584	0.805328	0.905155	0.217943	0.907052	-	+	STIC_Epithelium PAX8 pos	HALLMARK_MTORC1_SIGNALING;HALLMARK_PI3K_AKT_MTOR_SIGNALING	AKT phosphorylates targets in the cytosol;APC truncation mutants have impaired AXIN binding;AXIN missense mutants destabilize the destruction complex;Beta-catenin phosphorylation cascade;B-WICH complex positively regulates rRNA expression;Constitutive Signaling by AKT1 E17K in Cancer;CRMPs in Sema3A signaling;Degradation of beta-catenin by the destruction complex;Degradation of GLI2 by the protea…	WP_ACUTE_VIRAL_MYOCARDITIS;WP_ALZHEIMERS_DISEASE;WP_ALZHEIMERS_DISEASE_AND_MIRNA_EFFECTS;WP_ANDROGEN_RECEPTOR_SIGNALING_PATHWAY;WP_ANGIOPOIETINLIKE_PROTEIN_8_REGULATORY_PATHWAY;WP_B_CELL_RECEPTOR_SIGNALING_PATHWAY;WP_BRAINDERIVED_NEUROTROPHIC_FACTOR_BDNF_SIGNALING_PATHWAY;WP_BREAST_CANCER_PATHWAY;WP_CARDIAC_HYPERTROPHIC_RESPONSE;WP_CARDIAC_PROGENITOR_DIFFERENTIATION;WP_CELL_CYCLE;WP_CHEMOKINE_SIG…	-	-	-	+	3.42575	0.00180545	0.685857	5.24665	0.901311	0.0399813	P49841	P49841	GSK3B_HUMAN	Glycogen synthase kinase-3 beta	C (7)		2961	1343
GGT7	C1	-2.24682	-1.54593	-1.54325	-1.34481	0.23243	0.203186	0.696488	0.470611	-0.126359	0.638322	0.670667	0.362067	0.538092	0.770415	-0.363674	0.473301	0.84665	1.26862	-	-	-	-	Aflatoxin activation and detoxification;Glutathione synthesis and recycling	-	-	-	-	+	0.218416	0.705065	0.127916	0.53437	2.80149	0.000286359	Q9UJ14	Q9UJ14	GGT7_HUMAN	Glutathione hydrolase 7	C (7)		2962	4346
RSL24D1	C1	-1.99103	-0.843858	-2.03653	-1.13523	-0.140527	-0.799386	0.0806972	0.413242	0.608707	0.641994	0.798407	0.228535	0.641706	1.05508	-0.395301	0.749338	1.26247	0.86168	-	-	-	-	-	-	-	-	-	+	0.407603	0.499438	0.176853	0.896222	4.13798	4e-05	Q9UHA3	Q9UHA3	RLP24_HUMAN	Probable ribosome biogenesis protein RLP24	C (7)		2963	4312
ZNF598	C1	-2.70552	-1.11059	-0.954607	-0.547448	-0.0489313	-0.453324	0.0270654	0.27916	0.648433	0.448558	0.451628	0.465558	0.280893	1.40297	-0.820447	1.13385	1.37255	0.130197	-	-	-	-	-	-	-	-	-	+	0.21754	0.705824	0.115512	0.532539	2.29057	0.00170492	Q86UK7	Q86UK7	ZN598_HUMAN	E3 ubiquitin-protein ligase ZNF598	C (7)		2964	2665
POLR3B	C1	-2.01435	-1.95813	-1.6	-1.34802	0.66584	0.473577	0.57429	0.478484	0.801498	0.528347	0.226037	0.534754	0.487913	1.2503	0.0790249	0.541186	0.370477	-0.0912289	-	-	-	-	Cytosolic sensors of pathogen-associated DNA;RNA Polymerase III Abortive And Retractive Initiation;RNA Polymerase III Chain Elongation;RNA Polymerase III Transcription Initiation From Type 1 Promoter;RNA Polymerase III Transcription Initiation From Type 2 Promoter;RNA Polymerase III Transcription Initiation From Type 3 Promoter;RNA Polymerase III Transcription Termination	WP_CYTOSOLIC_DNASENSING_PATHWAY;WP_EUKARYOTIC_TRANSCRIPTION_INITIATION;WP_PYRIMIDINE_METABOLISM	-	-	-	+	0.161665	0.774915	-0.079525	-0.411787	2.21075	0.00111401	Q9NW08	Q9NW08	RPC2_HUMAN	DNA-directed RNA polymerase III subunit RPC2	C (7)		2965	4135
SIM1	C1	-1.77586	-2.05255	-1.48109	-1.43716	-0.166987	-0.234685	0.40227	0.498765	0.5052	0.575988	0.358958	0.53582	0.55928	1.06405	0.239382	1.33066	0.648223	0.429727	-	-	-	-	-	-	-	-	-	+	0.693454	0.291366	0.261954	1.36374	4.66174	0	P81133	P81133	SIM1_HUMAN	Single-minded homolog 1	C (7)		2966	1647
MYO9B	C1	-1.66713	-2.37312	-2.02747	0.444257	-0.484033	0.151648	0.308159	0.436866	0.52979	0.0808561	0.20851	0.511482	0.848949	0.460545	1.26154	0.608008	0.296625	0.404516	-	-	-	HALLMARK_MITOTIC_SPINDLE	Regulation of actin dynamics for phagocytic cup formation;Rho GTPase cycle;SLIT2:ROBO1 increases RHOA activity	WP_VITAMIN_D_RECEPTOR_PATHWAY	-	-	-	+	1.02378	0.148698	0.221474	1.84595	2.51244	0.000750115	Q13459	Q13459	MYO9B_HUMAN	Unconventional myosin-IXb	C (7)		2967	1885
WIZ	C1	-2.01301	-2.1209	-1.72241	0.278673	-0.52094	-0.528984	-0.148746	0.244627	0.747183	0.494412	0.598848	0.488491	0.433599	0.948917	0.856577	0.96051	0.750782	0.252362	-	-	-	HALLMARK_UV_RESPONSE_UP	-	-	-	-	-	+	0.908932	0.187934	0.189134	1.68277	3.52778	0.000133144	O95785	O95785	WIZ_HUMAN	Protein Wiz	C (7)		2968	576
CLCC1	C1	-2.33758	-1.59132	-1.94864	0.195836	-1.05712	0.245633	0.621176	0.629396	0.559429	0.448976	0.692184	0.860202	0.331698	0.212866	0.799801	0.393634	0.670734	0.273094	-	-	-	-	-	-	-	-	-	+	0.917145	0.184941	-0.167642	-1.69457	3.20587	0.000142759	Q96S66	Q96S66	CLCC1_HUMAN	Chloride channel CLIC-like protein 1	C (7)		2969	3499
PIAS2	C1	-1.89741	-2.35364	-1.67459	-0.434241	0.274007	-0.478431	0.493961	0.449909	0.289654	0.349063	0.667	0.603423	0.699931	0.440803	1.22163	-0.0113956	0.691774	0.668552	-	-	-	HALLMARK_SPERMATOGENESIS	Activation of anterior HOX genes in hindbrain development during early embryogenesis	WP_ANDROGEN_RECEPTOR_SIGNALING_PATHWAY;WP_TGFBETA_SIGNALING_PATHWAY	-	-	-	+	0.365635	0.541321	0.11023	0.820806	3.3033	0.000142563	O75928	Q9Y6X2;O75928	PIAS2_HUMAN	E3 SUMO-protein ligase PIAS2	C (7)		2970	468
KIF1A	C1	-2.63302	-1.68012	-1.55314	0.116605	0.183809	0.341917	0.396806	0.225629	0.197855	-0.280384	0.0638732	0.331387	0.541627	0.787973	1.21571	1.21803	0.589846	-0.0643988	-	-	-	-	COPI-dependent Golgi-to-ER retrograde traffic;Kinesins	WP_2Q37_COPY_NUMBER_VARIATION_SYNDROME	-	-	-	+	1.52972	0.052335	0.6023	2.53667	1.9857	0.00176398	Q12756	Q12756	KIF1A_HUMAN	Kinesin-like protein KIF1A	C (7)		2971	1808
MEAF6	C1	-2.29718	-0.011013	-2.91061	0.507735	0.112499	-0.657395	0.34847	0.478279	0.36626	0.318368	0.49736	0.553939	0.249604	0.209941	0.627046	0.715613	0.449596	0.441482	-	-	-	-	HATs acetylate histones;Regulation of TP53 Activity through Acetylation	-	-	-	-	+	0.0890799	0.872455	0.018659	0.240828	1.69844	0.00434115	Q9HAF1	Q9HAF1	EAF6_HUMAN	Chromatin modification-related protein MEAF6	C (7)		2972	3943
N4BP2L2	C1	-2.86235	0.0556642	-2.54634	0.375896	0.220096	0.0821626	0.131094	0.323013	0.468288	0.286359	0.328071	0.385285	0.514849	0.415091	0.0947463	0.58283	0.535055	0.610184	-	-	-	-	-	-	-	-	-	+	0.805705	0.234372	0.157202	1.53243	1.27911	0.0105138	Q92802	Q92802	N42L2_HUMAN	NEDD4-binding protein 2-like 2	C (7)		2973	3169
TRIO	C1	-2.62517	0.310542	-2.30758	0.503096	-0.568345	-0.470274	0.295536	0.152317	0.247024	0.270004	0.213287	0.304414	0.379111	0.332282	1.19513	-0.0967064	1.12714	0.738195	-	-	-	HALLMARK_MITOTIC_SPINDLE	DCC mediated attractive signaling;G alpha (12/13) signalling events;G alpha (q) signalling events;NRAGE signals death through JNK;Rho GTPase cycle	WP_MICROTUBULE_CYTOSKELETON_REGULATION;WP_NEURAL_CREST_CELL_MIGRATION_DURING_DEVELOPMENT;WP_NEURAL_CREST_CELL_MIGRATION_IN_CANCER	-	-	-	+	0.973116	0.164431	0.26903	1.77442	1.74508	0.00445178	O75962	O75962	TRIO_HUMAN	Triple functional domain protein	C (7)		2974	475
PMS2	C1	-2.24725	0.191353	-1.75558	0.455806	-1.32017	-0.783199	0.388175	-0.0672974	0.400845	0.559696	-0.02736	0.342358	-0.0428822	0.0433187	0.447826	1.75654	0.174619	1.4832	-	-	-	HALLMARK_E2F_TARGETS	Defective Mismatch Repair Associated With MLH1;Defective Mismatch Repair Associated With PMS2;Mismatch repair (MMR) directed by MSH2:MSH3 (MutSbeta);Mismatch repair (MMR) directed by MSH2:MSH6 (MutSalpha);TP53 Regulates Transcription of DNA Repair Genes	WP_DNA_MISMATCH_REPAIR;WP_DNA_REPAIR_PATHWAYS_FULL_NETWORK;WP_MALE_INFERTILITY	-	-	-	+	0.544957	0.386969	0.270973	1.12931	2.02778	0.00231648	P54278	P54278	PMS2_HUMAN	Mismatch repair endonuclease PMS2	C (7)		2975	1442
MMGT1	C1	-2.12901	-0.940195	-2.19397	0.96758	-1.22586	0.899469	0.711984	0.0870943	0.481523	0.574324	0.206444	0.647953	0.347743	-0.607483	0.902144	0.333537	0.214032	0.722692	-	-	-	-	Miscellaneous transport and binding events	-	-	-	-	+	0.230588	0.690091	-0.0739468	-0.55963	1.24313	0.0198245	Q8N4V1	Q8N4V1	EMC5_HUMAN	ER membrane protein complex subunit 5	C (7)		2976	2865
MSH3	C1	-1.49002	-1.27629	-2.42092	0.322874	-0.714794	0.0700113	0.04324	0.978162	0.47498	0.189973	0.0224266	0.905545	-0.359175	0.146931	1.60093	0.895389	-0.375566	0.986303	-	-	-	-	Defective Mismatch Repair Associated With MSH2;Defective Mismatch Repair Associated With MSH3;Mismatch repair (MMR) directed by MSH2:MSH3 (MutSbeta)	WP_CHROMOSOMAL_AND_MICROSATELLITE_INSTABILITY_IN_COLORECTAL_CANCER;WP_DNA_REPAIR_PATHWAYS_FULL_NETWORK	-	-	-	+	0.0446554	0.935193	0.00853777	0.125925	1.9279	0.0279224	P20585	P20585	MSH3_HUMAN	DNA mismatch repair protein Msh3	C (7)		2977	946
RBCK1	C1	-3.33998	0.481342	-1.78277	0.475734	-0.0565113	-0.132991	0.669584	0.157104	0.176506	0.496991	0.557499	0.376393	0.663873	-0.0698819	0.125812	0.551764	0.265974	0.383557	-	-	-	HALLMARK_GLYCOLYSIS;HALLMARK_INTERFERON_GAMMA_RESPONSE	Antigen processing: Ubiquitination & Proteasome degradation;Regulation of TNFR1 signaling;TNFR1-induced NFkappaB signaling pathway	-	-	-	-	+	0.256503	0.65924	-0.0655793	-0.612336	1.07102	0.0242655	Q9BYM8	Q9BYM8	HOIL1_HUMAN	RanBP-type and C3HC4-type zinc finger-containing protein 1	C (7)		2978	3730
BCAR1	C1	-2.71253	0.128422	-2.56842	0.269316	0.363444	0.581203	0.41201	0.859137	0.403822	0.305056	0.558041	0.368592	0.576751	-0.209098	0.251718	0.639892	-0.103537	-0.123823	-	-	-	HALLMARK_MITOTIC_SPINDLE;HALLMARK_XENOBIOTIC_METABOLISM	Downstream signal transduction;p130Cas linkage to MAPK signaling for integrins;PTK6 Regulates RHO GTPases, RAS GTPase and MAP kinases;VEGFA-VEGFR2 Pathway	WP_CHEMOKINE_SIGNALING_PATHWAY;WP_EGFEGFR_SIGNALING_PATHWAY;WP_FOCAL_ADHESION;WP_GASTRIN_SIGNALING_PATHWAY;WP_INTEGRINMEDIATED_CELL_ADHESION;WP_MIR5093P_ALTERATION_OF_YAP1ECM_AXIS;WP_NRP1TRIGGERED_SIGNALING_PATHWAYS_IN_PANCREATIC_CANCER;WP_REGULATION_OF_ACTIN_CYTOSKELETON;WP_TGFBETA_SIGNALING_PATHWAY;WP_VEGFAVEGFR2_SIGNALING	-	-	-	+	0.993337	0.157718	-0.193324	-1.80305	0.91691	0.0443163	P56945	P56945	BCAR1_HUMAN	Breast cancer anti-estrogen resistance protein 1	C (7)		2979	1487
POLR1B	C1	-3.00455	-0.465714	-1.81371	0.747834	0.229868	-0.943345	0.329706	0.572672	0.655767	0.566988	0.706492	0.491667	0.358585	0.195936	0.0310597	0.538788	0.0435913	0.75836	-	-	-	-	B-WICH complex positively regulates rRNA expression;NoRC negatively regulates rRNA expression;RNA Polymerase I Chain Elongation;RNA Polymerase I Promoter Escape;RNA Polymerase I Transcription Initiation;RNA Polymerase I Transcription Termination	WP_2Q13_COPY_NUMBER_VARIATION_SYNDROME;WP_EUKARYOTIC_TRANSCRIPTION_INITIATION;WP_PYRIMIDINE_METABOLISM	-	-	-	+	0.987173	0.159646	-0.184681	-1.79434	1.74543	0.00414337	Q9H9Y6	Q9H9Y6	RPA2_HUMAN	DNA-directed RNA polymerase I subunit RPA2	C (7)		2980	3937
PPIP5K2	C1	-2.9407	0.160838	-1.91122	0.617467	0.246605	-1.09465	0.502513	0.832617	0.369336	0.390173	0.337165	0.536001	0.176153	0.47403	0.860773	0.105405	-0.239439	0.576928	-	-	-	-	Synthesis of pyrophosphates in the cytosol	-	-	-	-	+	0.444227	0.467189	-0.153261	-0.960272	1.46005	0.00752762	O43314	O43314	VIP2_HUMAN	Inositol hexakisphosphate and diphosphoinositol-pentakisphosphate kinase 2	C (7)		2981	272
SETMAR	C1	-2.22399	0.0479018	-2.44062	0.067572	-0.223723	-1.01202	0.786253	0.659755	0.820591	0.804826	0.840584	0.698817	0.471709	0.540874	0.369592	0.456422	0.0954156	-0.759957	-	+	STIC_Epithelium PAX8 pos	-	-	WP_HISTONE_MODIFICATIONS	-	-	-	+	1.73631	0.0353477	-0.365382	-2.81388	2.60112	0.000757645	Q53H47	Q53H47	SETMR_HUMAN	Histone-lysine N-methyltransferase SETMAR	C (7)		2982	2240
SURF6	C1	-2.3439	0.199018	-2.13207	0.0434445	-0.244818	-1.40027	0.660718	0.731849	1.02603	0.716026	0.849226	0.955979	0.376733	0.19072	-0.220822	0.618823	0.226605	-0.253283	-	+	STIC_Epithelium PAX8 pos	-	-	-	-	-	-	+	2.88484	0.00448682	-0.853491	-4.41529	2.87784	0.000196554	O75683	O75683	SURF6_HUMAN	Surfeit locus protein 6	C (7)		2983	444
PPAT	C1	-2.03845	0.31957	-2.97226	-0.0611801	-0.230763	-0.133152	0.572605	0.659705	0.650205	0.726633	0.604144	0.620353	0.424669	0.788658	-0.471069	0.487736	0.256922	-0.204327	-	-	-	HALLMARK_UV_RESPONSE_UP	Purine ribonucleoside monophosphate biosynthesis	WP_FLUOROPYRIMIDINE_ACTIVITY;WP_METABOLIC_REPROGRAMMING_IN_COLON_CANCER;WP_PURINE_METABOLISM_AND_RELATED_DISORDERS	-	-	-	+	1.28803	0.0863534	-0.377668	-2.21048	1.75659	0.00360027	Q06203	Q06203	PUR1_HUMAN	Amidophosphoribosyltransferase	C (7)		2984	1757
PAXIP1	C1	-2.8071	-0.836431	-0.542692	-0.93503	-0.278025	-0.791893	0.37169	0.912344	0.856793	0.842636	0.464403	-0.904018	0.554636	0.609936	0.579575	0.0705877	0.469021	1.36357	-	-	-	HALLMARK_GLYCOLYSIS	Activation of anterior HOX genes in hindbrain development during early embryogenesis;Nonhomologous End-Joining (NHEJ)	WP_16P112_PROXIMAL_DELETION_SYNDROME;WP_SMC1SMC3_ROLE_IN_DNA_DAMAGE_CORNELIA_DE_LANGE_SYNDROME	-	-	-	+	0.230097	0.690645	0.115318	0.558618	2.74636	0.000578337	Q6ZW49	Q6ZW49	PAXI1_HUMAN	PAX-interacting protein 1	C (7)		2985	2563
MED26	C1	-1.86754	-0.784209	-1.47043	0.59494	-1.01071	-0.722768	-0.51824	0.742342	0.725572	0.272654	0.732707	-1.58315	0.969735	0.94726	0.395358	1.1648	0.820772	0.590914	-	-	-	-	Generic Transcription Pathway;PPARA activates gene expression;Transcriptional regulation of white adipocyte differentiation	-	-	-	-	+	1.04525	0.142508	0.493731	1.87606	2.30366	0.0014243	O95402	O95402	MED26_HUMAN	Mediator of RNA polymerase II transcription subunit 26	C (7)		2986	548
FGD4	C1	-1.28366	0.783341	-0.215996	-1.88286	0.142463	-1.49127	0.471511	0.0326619	-0.171151	0.399983	0.829064	0.806629	-1.68148	-0.114994	1.73913	1.05612	0.252623	0.327885	-	-	-	HALLMARK_MITOTIC_SPINDLE	G alpha (12/13) signalling events;NRAGE signals death through JNK;Rho GTPase cycle	WP_GLUCOCORTICOID_RECEPTOR_PATHWAY;WP_INTRACELLULAR_TRAFFICKING_PROTEINS_INVOLVED_IN_CMT_NEUROPATHY;WP_NUCLEAR_RECEPTORS_METAPATHWAY	-	-	-	+	0.0977442	0.861819	-0.109361	-0.262233	0.860933	0.0435642	Q96M96	Q96M96	FGD4_HUMAN	FYVE, RhoGEF and PH domain-containing protein 4	C (7)		2987	3426
SLC39A7	C1	-1.49848	0.716467	-1.30365	-1.67711	0.554162	-1.13368	0.802107	0.722335	0.213907	0.678142	0.816836	-0.871749	-1.41874	0.527611	1.04022	0.00655544	0.915091	0.909977	-	-	-	-	Zinc influx into cells by the SLC39 gene family	WP_NRF2_PATHWAY;WP_NUCLEAR_RECEPTORS_METAPATHWAY;WP_ZINC_HOMEOSTASIS	-	-	-	+	0.0483406	0.928647	-0.0671202	-0.135815	1.06096	0.0206967	Q92504	Q92504	S39A7_HUMAN	Zinc transporter SLC39A7	C (7)		2988	3135
HPCAL1	C1	-2.11011	0.934523	-0.99097	-1.30574	-0.838777	0.0484768	0.773602	0.615417	0.745797	0.77139	0.777071	0.712592	-2.05024	0.25507	0.300381	0.586404	0.249505	0.525604	-	-	-	-	-	-	-	-	-	+	1.01844	0.150269	-0.743229	-1.83845	1.49337	0.00647642	P37235	P37235	HPCL1_HUMAN	Hippocalcin-like protein 1	C (7)		2989	1187
GMEB2	C1	-1.97883	0.135801	-0.00129104	-3.01662	-0.0471883	-0.393242	1.08146	0.551043	0.878843	0.198753	0.932603	0.0065326	0.26961	0.290027	0.255984	0.390594	-0.076839	0.522759	-	-	-	-	-	-	-	-	-	+	0.929022	0.180886	-0.29659	-1.7116	1.84728	0.00285956	Q9UKD1	Q9UKD1	GMEB2_HUMAN	Glucocorticoid modulatory element-binding protein 2	C (7)		2990	4367
TGS1	C1	-2.80326	0.430335	-0.630622	-2.37185	0.596223	0.0330626	0.414512	0.153398	0.320721	0.156341	0.279388	0.493456	0.734346	0.505064	-0.117335	0.700047	0.658866	0.447311	-	-	-	-	Activation of gene expression by SREBF (SREBP);BMAL1:CLOCK,NPAS2 activates circadian gene expression;Circadian Clock;PPARA activates gene expression;Regulation of lipid metabolism by Peroxisome proliferator-activated receptor alpha (PPARalpha);RORA activates gene expression;RUNX3 regulates YAP1-mediated transcription;snRNP Assembly;Transcriptional activation of mitochondrial biogenesis;Transcript…	-	-	-	-	+	0.660094	0.311097	0.110606	1.31234	1.34014	0.0144106	Q96RS0	Q96RS0	TGS1_HUMAN	Trimethylguanosine synthase	C (7)		2991	3487
SGF29	C1	-2.01087	-0.209372	-0.43523	-2.72214	0.422569	0.130733	0.0489387	-0.0257656	0.742054	0.143073	0.854221	0.582158	-0.960233	0.713051	0.912158	0.777341	0.705537	0.33178	-	-	-	-	HATs acetylate histones	-	-	-	-	+	0.0239924	0.964707	0.0116302	0.0691239	1.36506	0.0156451	Q96ES7	Q96ES7	SGF29_HUMAN	SAGA-associated factor 29	C (7)		2992	3317
ARID5B	C1	-1.36983	-0.828412	-0.245565	-0.916748	-0.852137	-1.24687	0.428871	0.292564	-0.744823	0.736686	0.174638	0.839223	1.23734	0.837236	-1.73466	1.23048	1.25668	0.90533	Ciliated_2;Secretory_3	-	-	HALLMARK_ANDROGEN_RESPONSE;HALLMARK_INTERFERON_GAMMA_RESPONSE	HDMs demethylate histones	WP_FTO_OBESITY_VARIANT_MECHANISM;WP_MESODERMAL_COMMITMENT_PATHWAY;WP_PATHWAYS_AFFECTED_IN_ADENOID_CYSTIC_CARCINOMA	-	-	-	+	0.265451	0.648378	0.384258	0.630214	1.99528	0.00162677	Q14865	Q14865	ARI5B_HUMAN	AT-rich interactive domain-containing protein 5B	C (7)		2993	2004
BST2	C1	-1.77164	-0.341511	0.517381	0.129599	0.139309	-1.94128	0.454469	0.0557629	-0.471744	0.196725	-0.0155274	-0.348855	1.48227	1.08044	-1.77006	0.440277	1.23328	0.931105	Unclassified _1	-	-	HALLMARK_INFLAMMATORY_RESPONSE;HALLMARK_INTERFERON_ALPHA_RESPONSE;HALLMARK_INTERFERON_GAMMA_RESPONSE	Interferon alpha/beta signaling;Neutrophil degranulation	WP_EBOLA_VIRUS_INFECTION_IN_HOST;WP_HOSTPATHOGEN_INTERACTION_OF_HUMAN_CORONAVIRUSES_MAPK_SIGNALING;WP_NETWORK_MAP_OF_SARSCOV2_SIGNALING_PATHWAY	-	-	-	+	0.561801	0.37578	0.685372	1.15669	0.801078	0.0449758	Q10589	Q10589	BST2_HUMAN	Bone marrow stromal antigen 2	C (7)		2994	1807
PCDH1	C1	-1.50524	-0.455205	-1.72827	0.743607	0.462676	-2.05539	0.149982	1.04291	0.561142	0.225907	0.297959	0.520757	0.627786	-0.150048	-1.32134	0.491346	1.29209	0.799333	-	-	-	HALLMARK_APICAL_JUNCTION	-	-	-	-	-	+	0.176336	0.75681	-0.145233	-0.444292	1.20073	0.0160265	Q08174	Q08174	PCDH1_HUMAN	Protocadherin-1	C (7)		2995	1779
SEC14L2	C1	-1.68173	-0.865737	-0.606287	-0.42208	0.366257	-0.837841	0.872044	0.0990792	0.35614	-0.00719427	0.890008	0.16814	0.811569	0.665812	-1.77983	2.31343	-0.7378	0.396027	-	-	-	HALLMARK_ESTROGEN_RESPONSE_EARLY	-	WP_HEMATOPOIETIC_STEM_CELL_DIFFERENTIATION	-	-	-	+	0.0723003	0.895257	-0.0885755	-0.198486	0.908372	0.0400693	O76054	O76054	S14L2_HUMAN	SEC14-like protein 2	C (7)		2996	483
MYO1B	C1	-1.72468	0.198968	-1.41371	0.132583	-0.0846485	-1.66876	-0.0854869	0.190219	-0.0797734	0.320002	0.0286684	1.15513	1.55412	1.50039	-0.750942	1.44012	-0.0987272	-0.613472	-	-	-	-	-	-	-	-	-	+	0.206466	0.71917	0.208522	0.509238	1.24132	0.0142121	O43795	O43795	MYO1B_HUMAN	Unconventional myosin-Ib	C (7)		2997	311
BLOC1S4	C1	-2.68297	-0.0551031	-0.0441357	0.156396	-0.166112	-2.33562	0.322875	1.439	0.0105774	0.521271	0.925041	0.716257	0.491948	0.424943	0.120134	0.13269	0.109183	-0.0863752	-	-	-	-	Golgi Associated Vesicle Biogenesis	WP_ALSTROM_SYNDROME	-	-	-	+	1.18056	0.107883	-0.239628	-2.06364	1.79407	0.0057801	Q9NUP1	Q9NUP1	BL1S4_HUMAN	Biogenesis of lysosome-related organelles complex 1 subunit 4	C (7)		2998	4097
EMG1	C1	-2.30725	0.0180221	-0.322127	-0.736588	-0.596205	-2.59276	0.27852	0.636721	0.692523	0.34184	0.306214	0.565793	0.492961	0.72689	0.328724	0.647505	0.704701	0.814518	-	-	-	-	Major pathway of rRNA processing in the nucleolus and cytosol;rRNA modification in the nucleus and cytosol	-	-	-	-	+	0.738371	0.265792	0.14405	1.43199	3.25893	0.000128561	Q92979	Q92979	NEP1_HUMAN	Ribosomal RNA small subunit methyltransferase NEP1	C (7)		2999	3196
RTKN	C1	-2.3438	-0.247896	0.198217	-0.309849	-1.21269	-1.98395	0.0999557	0.573974	0.715542	0.655054	0.582433	0.784849	1.0127	-0.595711	0.781417	1.26631	0.202217	-0.17877	-	-	-	-	RHO GTPases Activate Rhotekin and Rhophilins	WP_G13_SIGNALING_PATHWAY	-	-	-	+	0.198587	0.72831	-0.109213	-0.492479	2.36425	0.001084	Q9BST9	Q9BST9	RTKN_HUMAN	Rhotekin	C (7)		3000	3635
FMNL2	C1	-2.54143	-0.0976065	0.38019	0.297458	-0.594028	-2.39685	0.342014	0.230959	0.698451	0.473902	0.759071	0.659961	0.802334	-0.547579	0.184325	0.978836	0.57373	-0.203738	-	-	-	-	RHO GTPases Activate Formins	WP_EPITHELIAL_TO_MESENCHYMAL_TRANSITION_IN_COLORECTAL_CANCER	-	-	-	+	0.403346	0.503566	-0.257226	-0.888675	1.50468	0.00579883	Q96PY5	Q8IVF7;Q96PY5	FMNL2_HUMAN	Formin-like protein 2	C (7)		3001	3464
SPCS1	C1	-3.60619	0.0432041	-0.345127	-0.326444	-0.462424	-0.195597	0.261319	0.997322	0.604564	0.829832	0.688375	0.685838	0.501218	0.314817	-0.0649518	0.279841	-0.0877478	-0.117845	-	+	STIC_Epithelium PAX8 pos	HALLMARK_PANCREAS_BETA_CELLS;HALLMARK_UNFOLDED_PROTEIN_RESPONSE	SRP-dependent cotranslational protein targeting to membrane;Synthesis, secretion, and deacylation of Ghrelin;Synthesis, secretion, and inactivation of Glucagon-like Peptide-1 (GLP-1);Synthesis, secretion, and inactivation of Glucose-dependent Insulinotropic Polypeptide (GIP)	-	-	-	-	+	2.37528	0.0107292	-0.423471	-3.6846	1.68314	0.00486762	Q9Y6A9	Q9Y6A9	SPCS1_HUMAN	Signal peptidase complex subunit 1	C (7)		3002	4637
RANBP6	C1	-3.62607	0.20271	-0.312809	0.0481648	-0.292901	-0.424756	0.0548026	-0.00121693	0.372206	1.01772	0.438707	0.0319236	0.321999	0.749167	-0.0425463	1.15571	0.262593	0.0445993	-	-	-	-	-	-	-	-	-	+	0.153303	0.786688	0.0833685	0.39298	1.10216	0.0205603	O60518	O60518	RNBP6_HUMAN	Ran-binding protein 6	C (7)		3003	353
POLR1A	C1	-3.14958	-0.260257	0.0885637	0.196996	-1.46195	-0.584319	0.387796	0.529594	0.708477	0.232094	0.655813	0.712772	0.749357	0.059151	-0.178275	0.780384	-0.512469	1.04585	-	-	-	-	B-WICH complex positively regulates rRNA expression;NoRC negatively regulates rRNA expression;RNA Polymerase I Chain Elongation;RNA Polymerase I Promoter Escape;RNA Polymerase I Transcription Initiation;RNA Polymerase I Transcription Termination	WP_2Q13_COPY_NUMBER_VARIATION_SYNDROME;WP_EUKARYOTIC_TRANSCRIPTION_INITIATION;WP_PYRIMIDINE_METABOLISM	-	-	-	+	0.356302	0.551514	-0.102521	-0.803713	1.67048	0.00847401	O95602	O95602	RPA1_HUMAN	DNA-directed RNA polymerase I subunit RPA1	C (7)		3004	561
ORC3	C1	-2.72734	-0.517074	-0.738466	1.26582	-0.279483	-1.19476	0.652799	-0.719602	0.28708	0.669802	0.312638	0.195296	1.12341	-0.754945	0.490019	1.29737	0.508111	0.129324	-	-	-	-	Activation of ATR in response to replication stress;Activation of the pre-replicative complex;Assembly of the ORC complex at the origin of replication;Assembly of the pre-replicative complex;Association of licensing factors with the pre-replicative complex;CDC6 association with the ORC:origin complex;CDT1 association with the CDC6:ORC:origin complex;E2F-enabled inhibition of pre-replication compl…	WP_CELL_CYCLE;WP_DNA_REPLICATION;WP_G1_TO_S_CELL_CYCLE_CONTROL	-	-	-	+	0.268196	0.646083	0.0990232	0.635668	1.01564	0.0463625	Q9UBD5	Q9UBD5	ORC3_HUMAN	Origin recognition complex subunit 3	C (7)		3005	4266
CNNM4	C1	-1.99958	-1.23914	-0.222658	1.02213	-1.67772	-1.71853	0.208341	0.257219	0.572529	0.562797	0.154457	0.247501	0.657698	0.120662	0.253497	1.0662	1.42046	0.314134	-	-	-	-	-	WP_2Q112_COPY_NUMBER_VARIATION_SYNDROME	-	-	-	+	0.697415	0.289334	0.167833	1.36981	2.3717	0.0015867	Q6P4Q7	Q6P4Q7	CNNM4_HUMAN	Metal transporter CNNM4	C (7)		3006	2482
GPR107	C1	-0.712942	-1.01923	-0.728249	-0.094128	-2.10395	-0.125835	0.744193	0.915189	-1.18365	-0.786122	0.897451	1.23331	1.22471	0.425171	-1.05453	0.850066	0.577513	0.941023	-	-	-	-	-	-	-	-	-	+	0.138443	0.806876	0.169833	0.359029	1.36839	0.00964451	Q5VW38	Q5VW38	GP107_HUMAN	Protein GPR107	C (7)		3007	2375
ZKSCAN8	C1	-0.803498	-0.187599	-0.328662	0.396865	-2.81721	-0.409928	0.119163	-0.261571	-1.45796	0.231547	0.0622638	0.524512	1.52025	0.582315	0.942569	0.401952	1.2926	0.1924	-	+	STIC_Epithelium PAX8 pos	-	Generic Transcription Pathway	-	-	-	-	+	1.63536	0.0430159	0.695618	2.67843	1.73705	0.0045718	Q15776	Q15776	ZKSC8_HUMAN	Zinc finger protein with KRAB and SCAN domains 8	C (7)		3008	2102
RSBN1L	C1	-1.84365	-0.12869	-0.919074	-0.559145	-1.94986	-0.0166255	0.562519	-0.239525	0.408435	-0.243066	0.348564	0.539769	0.449572	1.11031	-0.671202	1.02171	-0.0337881	2.16376	-	-	-	-	-	-	-	-	-	+	0.484259	0.433932	0.244638	1.02861	2.04536	0.00311496	Q6PCB5	Q6PCB5	RSBNL_HUMAN	Lysine-specific demethylase RSBN1L	C (7)		3009	2489
MTARC1	C1	-1.91949	-0.01446	-0.483412	-0.887222	-1.20047	-0.105556	-0.592819	-0.026066	-0.0647115	-0.137775	-0.763984	0.57599	1.50428	1.02052	-0.494384	1.15486	0.293982	2.14072	-	+	STIC_Epithelium PAX8 pos	-	Phase I - Functionalization of compounds	-	-	-	-	+	1.57855	0.0477773	0.669024	2.60222	2.44575	0.00113353	Q5VT66	Q5VT66	MARC1_HUMAN	Mitochondrial amidoxime-reducing component 1	C (7)		3010	2360
UTP11	C1	-2.00989	-0.309905	-0.295084	-1.71843	-2.11001	-0.198683	0.307469	0.371053	0.847882	0.676172	0.443056	0.689233	0.782948	1.078	-0.415956	0.364936	0.589121	0.908078	-	-	-	-	Major pathway of rRNA processing in the nucleolus and cytosol;rRNA modification in the nucleus and cytosol	-	-	-	-	+	0.00670004	0.989912	-0.00551605	-0.0196733	3.40806	8.6e-05	Q9Y3A2	Q9Y3A2	UTP11_HUMAN	Probable U3 small nucleolar RNA-associated protein 11	C (7)		3011	4535
UTP4	C1	-2.3178	0.207241	-0.900946	-1.40442	-1.87888	0.0347514	0.124093	0.437025	0.775418	0.327845	0.419637	0.528741	0.985091	1.18138	-0.451719	0.483134	0.874053	0.575356	-	-	-	-	Major pathway of rRNA processing in the nucleolus and cytosol;rRNA modification in the nucleus and cytosol	-	-	-	-	+	0.292093	0.619549	0.141863	0.682546	2.83763	0.000314856	Q969X6	Q969X6	UTP4_HUMAN	U3 small nucleolar RNA-associated protein 4 homolog	C (7)		3012	3225
DHX33	C1	-2.145	-1.41182	-1.19044	-0.345238	-1.27538	0.251387	0.0893329	0.300425	0.597985	0.233001	0.595774	0.357921	1.25566	1.89229	-0.562568	0.655631	0.486479	0.214564	-	-	-	-	-	-	-	-	-	+	0.369354	0.538059	0.214471	0.827582	2.71496	0.000507746	Q9H6R0	Q9H6R0	DHX33_HUMAN	ATP-dependent RNA helicase DHX33	C (7)		3013	3888
C1orf122	C1	-2.63876	-0.786852	-0.646844	-0.0159886	-0.852387	-0.835723	0.251343	0.0881607	0.179142	0.013053	0.128255	-0.139464	1.2638	1.99817	-0.2477	0.733153	0.987028	0.521611	Secretory_1	-	-	-	-	-	-	-	-	+	1.52313	0.0530232	0.574368	2.52782	2.9898	0.000273563	Q6ZSJ8	Q6ZSJ8	CA122_HUMAN	Uncharacterized protein C1orf122	C (7)	+	3014	2548
FABP5	C1	-1.41475	-0.327332	-1.53826	-0.200283	-1.71262	-0.775295	-0.257962	0.610553	0.23717	0.0527721	0.0502784	0.321784	0.863134	2.1442	-0.584727	1.21858	1.05344	0.259314	Unclassified_3	-	-	HALLMARK_CHOLESTEROL_HOMEOSTASIS;HALLMARK_ESTROGEN_RESPONSE_LATE	Neutrophil degranulation;Signaling by Retinoic Acid;Triglyceride catabolism	WP_FATTY_ACID_TRANSPORTERS;WP_PPAR_SIGNALING_PATHWAY	-	-	-	+	0.893612	0.194305	0.749767	1.6607	2.9841	0.000168977	Q01469	Q01469	FABP5_HUMAN	Fatty acid-binding protein 5	C (7)		3015	1696
PDRG1	C1	-0.436327	-2.11545	0.819577	-1.05229	-1.83934	-1.69066	0.263231	0.795393	0.611944	0.496014	0.731573	0.364245	-0.0827668	1.02211	0.247804	0.66699	0.443605	0.754349	-	-	-	-	-	-	-	-	-	+	0.0702364	0.897812	-0.0280291	-0.193194	2.87707	0.000293557	Q9NUG6	Q9NUG6	PDRG1_HUMAN	p53 and DNA damage-regulated protein 1	C (7)		3016	4092
AVEN	C1	-1.13221	-2.01439	0.649075	-1.65971	-1.50661	-1.29618	0.673037	0.495872	0.471521	0.330493	0.860815	0.905902	0.856268	0.491136	0.502516	0.223441	0.522808	0.626223	-	-	-	-	-	-	-	-	-	+	0.291877	0.619532	-0.0698872	-0.682126	4.07366	4.02e-05	Q9NQS1	Q9NQS1	AVEN_HUMAN	Cell death regulator Aven	C (7)		3017	4025
HEATR1	C1	-1.12479	-1.12046	2.14021	-0.986529	-1.29444	-1.6833	-0.355943	0.319748	0.434655	-0.054117	-0.0460375	0.147895	1.12831	1.13053	-0.503943	0.579646	0.629082	0.659494	-	-	-	-	Major pathway of rRNA processing in the nucleolus and cytosol;rRNA modification in the nucleus and cytosol	-	-	-	-	+	1.10349	0.12683	0.324681	1.95723	1.12933	0.0244709	Q9H583	Q9H583	HEAT1_HUMAN	HEAT repeat-containing protein 1	C (7)		3018	3875
CRELD1	C1	-1.73542	-1.6309	1.22369	0.459799	-2.62803	0.0117454	0.544807	-0.402341	0.239558	0.401884	0.776311	0.424982	0.690654	0.421039	0.333474	-0.105126	0.460302	0.513556	-	-	-	-	-	-	-	-	-	+	0.104261	0.852575	0.0296267	0.278138	1.03548	0.0352539	Q96HD1	Q96HD1	CREL1_HUMAN	Protein disulfide isomerase CRELD1	C (7)		3019	3358
UIMC1	C1	-1.02066	-1.89881	0.19325	0.854471	-1.16675	0.522592	-1.51033	-0.65224	-0.0367206	-0.522975	0.512853	0.281928	0.756809	2.02487	-0.454156	0.309429	1.00467	0.801761	-	-	-	-	G2/M DNA damage checkpoint;Metalloprotease DUBs;Nonhomologous End-Joining (NHEJ);Processing of DNA double-strand break ends;Recruitment and ATM-mediated phosphorylation of repair and signaling proteins at DNA double strand breaks	WP_DNA_IRDAMAGE_AND_CELLULAR_RESPONSE_VIA_ATR	-	-	-	+	1.40304	0.0677447	0.440529	2.36619	1.12496	0.0360749	Q96RL1	Q96RL1	UIMC1_HUMAN	BRCA1-A complex subunit RAP80	C (7)		3020	3482
TIMM10	C1	-0.129618	-1.25448	-0.798841	0.171358	-1.81932	0.0352222	-0.651414	0.222098	0.57227	-1.08136	-0.0625337	0.147168	-0.532583	1.21262	0.418512	0.44338	2.66744	0.440085	-	-	-	HALLMARK_OXIDATIVE_PHOSPHORYLATION	Mitochondrial protein import	-	-	-	-	+	0.998027	0.156455	0.353578	1.80968	1.45532	0.0180788	P62072	P62072	TIM10_HUMAN	Mitochondrial import inner membrane translocase subunit Tim10	C (7)		3021	1551
ELL	C1	0.713862	-1.9677	0.0292627	-0.243538	-2.02643	0.312369	0.548618	-0.604954	0.639446	-0.908271	-0.0798557	-0.70702	1.59176	0.464219	-0.607433	0.839087	0.766756	1.23982	-	-	-	HALLMARK_DNA_REPAIR	Formation of HIV elongation complex in the absence of HIV Tat;Formation of HIV-1 elongation complex containing HIV-1 Tat;Formation of RNA Pol II elongation complex;HIV elongation arrest and recovery;Pausing and recovery of HIV elongation;Pausing and recovery of Tat-mediated HIV elongation;RNA Polymerase II Pre-transcription Events;RNA polymerase II transcribes snRNA genes;RNA Polymerase II Transc…	WP_INTERACTOME_OF_POLYCOMB_REPRESSIVE_COMPLEX_2_PRC2	-	-	-	+	1.27353	0.0889696	0.619592	2.19075	1.12562	0.0225184	P55199	P55199	ELL_HUMAN	RNA polymerase II elongation factor ELL	C (7)		3022	1465
RB1	C1	0.0197639	-2.14481	-0.397162	-0.223181	-2.31951	-0.158436	0.640828	-0.705169	0.342995	0.355275	0.2681	0.486731	0.701131	0.972314	-0.699587	1.29756	0.284449	1.27871	-	-	-	HALLMARK_MYOGENESIS;HALLMARK_P53_PATHWAY	Condensation of Prophase Chromosomes;Cyclin A:Cdk2-associated events at S phase entry;Cyclin D associated events in G1;Cyclin E associated events during G1/S transition;Formation of Senescence-Associated Heterochromatin Foci (SAHF);Inhibition of replication initiation of damaged DNA by RB1/E2F1;Oncogene Induced Senescence;Orc1 removal from chromatin;Phosphorylation of proteins involved in G1/S tr…	WP_7Q1123_COPY_NUMBER_VARIATION_SYNDROME;WP_ADIPOGENESIS;WP_ANDROGEN_RECEPTOR_SIGNALING_PATHWAY;WP_ARYL_HYDROCARBON_RECEPTOR_PATHWAY_WP2586;WP_BLADDER_CANCER;WP_BREAST_CANCER_PATHWAY;WP_CELL_CYCLE;WP_CILIARY_LANDSCAPE;WP_DNA_DAMAGE_RESPONSE;WP_EFFECT_OF_PROGERIN_ON_GENES_INVOLVED_IN_HUTCHINSONGILFORD_PROGERIA_SYNDROME;WP_FAS_LIGAND_PATHWAY_AND_STRESS_INDUCTION_OF_HEAT_SHOCK_PROTEINS;WP_G1_TO_S_CE…	-	-	-	+	0.535806	0.393835	0.304157	1.11433	1.83407	0.00351552	P06400	P06400	RB_HUMAN	Retinoblastoma-associated protein	C (7)		3023	683
SUMF1	C1	-0.388514	-0.659193	-0.860001	0.669337	-2.14509	-1.16419	-0.456364	-0.281029	-0.088921	-0.166938	0.364112	-0.899038	0.136626	0.684413	1.07862	1.77146	1.60633	0.798383	-	+	STIC_Epithelium PAX8 pos	-	Glycosphingolipid metabolism;The activation of arylsulfatases	-	-	-	-	+	2.73956	0.00570548	0.830533	4.20247	2.88487	0.000417755	Q8NBK3	Q8NBK3	SUMF1_HUMAN	Formylglycine-generating enzyme	C (7)		3024	2916
CRABP2	C1	-0.877486	0.216716	-0.0980143	-0.227896	-2.04556	-1.32086	0.0213958	-0.839804	-0.175442	-0.140784	-0.304158	-0.469432	0.404433	0.833886	1.37121	2.30746	0.95162	0.392718	Unclassified _1	+	STIC_Epithelium PAX8 pos	HALLMARK_PEROXISOME	Signaling by Retinoic Acid	WP_NONSMALL_CELL_LUNG_CANCER;WP_VITAMIN_A_AND_CAROTENOID_METABOLISM	-	-	-	+	2.78538	0.00518571	1.48041	4.26917	3.0324	0.000154564	P29373	P29373	RABP2_HUMAN	Cellular retinoic acid-binding protein 2	C (7)		3025	1075
NOL12	C1	0.0313863	-0.593493	-0.455039	-0.353437	-2.36795	-1.40968	-0.598651	-0.107516	0.262104	-0.234545	0.193308	0.210814	0.0229186	1.47526	0.456492	2.22898	0.510656	0.728396	-	+	STIC_Epithelium PAX8 pos	-	Major pathway of rRNA processing in the nucleolus and cytosol	-	-	-	-	+	1.62573	0.0439319	0.476847	2.66552	2.59276	0.00113258	Q9UGY1	Q9UGY1	NOL12_HUMAN	Nucleolar protein 12	C (7)		3026	4309
ACOT7	C1	0.0865894	-0.195396	-0.0355592	-0.0973464	-2.62075	-1.9063	-0.262561	-0.291321	0.207522	0.14103	0.430788	-0.246948	0.873985	1.56848	0.277015	1.45571	0.737042	-0.121981	-	+	STIC_Epithelium PAX8 pos	-	Mitochondrial Fatty Acid Beta-Oxidation	WP_7OXOC_AND_7BETAHC_PATHWAYS;WP_OXYSTEROLS_DERIVED_FROM_CHOLESTEROL	-	-	-	+	1.6629	0.0406742	1.09313	2.71538	1.935	0.00168545	O00154	O00154	BACH_HUMAN	Cytosolic acyl coenzyme A thioester hydrolase	C (7)		3027	104
DHTKD1	C1	-0.0776821	0.119638	0.0340502	-0.807905	-3.09744	0.848574	-0.526407	-0.183664	-0.0980522	0.00970452	0.0331903	-0.688606	-0.107378	0.918654	0.177352	1.41527	0.652073	1.37864	-	+	STIC_Epithelium PAX8 pos	-	Glyoxylate metabolism and glycine degradation	WP_KREBS_CYCLE_DISORDERS	-	-	-	+	2.22986	0.0136149	0.875058	3.48313	1.1647	0.0167485	Q96HY7	Q96HY7	DHTK1_HUMAN	2-oxoadipate dehydrogenase complex component E1	C (7)		3028	3370
WDR74	C1	-0.0336834	-0.319403	-0.563114	-1.92961	-2.61449	0.36897	-0.0841819	-0.0572245	0.317997	0.148134	0.35766	-0.00800421	0.448725	0.319936	-0.290128	1.50894	1.1544	1.27507	-	-	-	HALLMARK_MYC_TARGETS_V2	-	WP_NETWORK_MAP_OF_SARSCOV2_SIGNALING_PATHWAY	-	-	-	+	1.2337	0.096906	0.334159	2.13643	1.94646	0.00402905	Q6RFH5	Q6RFH5	WDR74_HUMAN	WD repeat-containing protein 74	C (7)		3029	2507
NAB2	C1	-0.250733	-0.116489	-0.563279	-0.177225	-3.52901	-0.330949	-0.102041	-0.113764	0.400043	0.21762	0.616999	0.261132	0.383855	0.0944708	0.992915	1.30294	0.65006	0.263452	-	-	-	HALLMARK_ESTROGEN_RESPONSE_LATE	-	-	-	-	-	+	0.999449	0.155938	0.495702	1.81168	1.61712	0.00407517	Q15742	Q15742	NAB2_HUMAN	NGFI-A-binding protein 2	C (7)		3030	2096
POLR2K	C1	-0.0591741	-0.12144	0.023956	-0.451975	-3.22265	-0.327814	-0.265444	-0.81671	0.649963	0.460606	0.489575	0.784318	0.655972	-0.728915	-0.0781388	0.805847	1.01299	1.18903	-	-	-	HALLMARK_DNA_REPAIR	Abortive elongation of HIV-1 transcript in the absence of Tat;Activation of anterior HOX genes in hindbrain development during early embryogenesis;B-WICH complex positively regulates rRNA expression;Cytosolic sensors of pathogen-associated DNA;Dual incision in TC-NER;FGFR2 alternative splicing;Formation of HIV elongation complex in the absence of HIV Tat;Formation of HIV-1 elongation complex cont…	WP_2Q13_COPY_NUMBER_VARIATION_SYNDROME;WP_CYTOSOLIC_DNASENSING_PATHWAY;WP_EUKARYOTIC_TRANSCRIPTION_INITIATION;WP_PYRIMIDINE_METABOLISM	-	-	-	+	0.279867	0.632987	0.140379	0.658694	1.00829	0.0379937	P53803	P53803	RPAB4_HUMAN	DNA-directed RNA polymerases I, II, and III subunit RPABC4	C (7)		3031	1430
SMG8	C1	-0.0805732	-0.50753	-0.0222782	-0.192147	-2.67259	-0.543689	0.234725	-1.81967	0.551212	0.152677	0.885289	0.960804	-0.015382	-0.0372942	0.658719	1.01814	1.54118	-0.111593	-	-	-	-	Nonsense Mediated Decay (NMD) enhanced by the Exon Junction Complex (EJC)	-	-	-	-	+	0.297964	0.612509	0.217359	0.693903	0.975917	0.0371703	Q8ND04	Q8ND04	SMG8_HUMAN	Nonsense-mediated mRNA decay factor SMG8	C (7)		3032	2935
TDP2	C1	0.430387	-0.521541	0.374977	-0.621374	-3.20246	-0.325891	0.330876	-1.131	0.606775	-0.138876	-0.301261	0.555524	1.07175	0.273344	1.03281	0.0248215	0.756797	0.784347	-	-	-	-	Nonhomologous End-Joining (NHEJ)	WP_OXIDATIVE_DAMAGE_RESPONSE	-	-	-	+	1.20601	0.102514	0.218067	2.09856	1.15745	0.044174	O95551	O95551	TYDP2_HUMAN	Tyrosyl-DNA phosphodiesterase 2	C (7)		3033	558
TOMM5	C1	-0.281807	0.480387	0.210245	-0.109211	-2.4539	-0.388197	-0.524102	-2.19173	0.746525	0.224693	0.141948	-0.0886282	-0.0578519	0.443373	0.728015	0.7388	0.626892	1.75455	-	-	-	-	Mitochondrial protein import;Pink/Parkin Mediated Mitophagy	-	-	-	-	+	1.16684	0.11083	0.714916	2.04476	1.0124	0.0299413	Q8N4H5	Q8N4H5	TOM5_HUMAN	Mitochondrial import receptor subunit TOM5 homolog	C (7)		3034	2857
MGA	C1	0.0269945	-0.178133	-0.958984	-0.758987	-1.65113	-1.054	-2.14894	0.523774	0.623714	0.631275	0.578232	1.36584	-0.777627	0.959989	0.532449	0.983363	0.395756	0.906411	-	-	-	-	Transcriptional Regulation by E2F6	WP_PATHWAYS_AFFECTED_IN_ADENOID_CYSTIC_CARCINOMA	-	-	-	+	0.164284	0.771732	0.184844	0.417634	1.24507	0.0147764	Q8IWI9	Q8IWI9	MGAP_HUMAN	MAX gene-associated protein	C (7)		3035	2746
CCNH	C1	-0.758156	-0.95844	0.286056	-1.39124	-0.580909	-0.594462	-1.52228	-1.50758	-0.558478	0.94753	0.989604	1.04181	-0.224024	0.926824	0.980342	1.31721	0.664163	0.942034	-	-	-	-	Cyclin A/B1/B2 associated events during G2/M transition;Cyclin A:Cdk2-associated events at S phase entry;Cyclin D associated events in G1;Cyclin E associated events during G1/S transition;Dual incision in TC-NER;Formation of HIV elongation complex in the absence of HIV Tat;Formation of HIV-1 elongation complex containing HIV-1 Tat;Formation of Incision Complex in GG-NER;Formation of RNA Pol II el…	WP_CELL_CYCLE;WP_DNA_REPAIR_PATHWAYS_FULL_NETWORK;WP_EUKARYOTIC_TRANSCRIPTION_INITIATION;WP_G1_TO_S_CELL_CYCLE_CONTROL;WP_NUCLEOTIDE_EXCISION_REPAIR;WP_NUCLEOTIDE_EXCISION_REPAIR_IN_XERODERMA_PIGMENTOSUM	-	-	-	+	0.831132	0.222251	0.885921	1.56984	1.49628	0.00628554	P51946	P51946	CCNH_HUMAN	Cyclin-H	C (7)		3036	1399
UCHL5	C1	-0.190109	-1.12828	-1.83727	-0.60091	-1.07223	-1.46211	0.146299	-0.591576	0.288765	0.218972	0.077837	-0.0183557	0.626572	1.56989	1.25657	1.32825	-0.0113074	1.399	-	+	STIC_Epithelium PAX8 pos	HALLMARK_MTORC1_SIGNALING	Downregulation of TGF-beta receptor signaling;UCH proteinases	WP_TGFBETA_SIGNALING_PATHWAY	-	-	-	+	2.33095	0.0114581	0.324277	3.62291	4.66529	0.000133618	Q9Y5K5	Q9Y5K5	UCHL5_HUMAN	Ubiquitin carboxyl-terminal hydrolase isozyme L5	C (7)		3037	4603
PRPF38B	C1	-0.261309	-0.559278	-2.15165	-0.547031	-1.07769	-0.959192	-0.514912	-0.881215	0.638316	0.301959	0.153329	-0.111246	-0.00840806	1.57884	0.673562	1.7176	0.760138	1.24818	-	+	STIC_Epithelium PAX8 pos	-	-	-	-	-	-	+	1.91506	0.0248319	0.290383	3.05439	3.45453	0.00108984	Q5VTL8	Q5VTL8	PR38B_HUMAN	Pre-mRNA-splicing factor 38B	C (7)		3038	2365
DCUN1D1	C1	0.00975392	-0.568219	-2.14785	-1.28489	-0.88713	-0.919688	0.5417	-0.173784	-0.0650773	0.480562	-0.150523	-0.446666	0.227324	2.06463	0.455424	1.0005	0.324037	1.53989	-	+	STIC_Epithelium PAX8 pos	HALLMARK_HEME_METABOLISM	Neddylation	-	-	-	-	+	1.60508	0.0455914	0.242021	2.63782	3.31569	0.00146302	Q96GG9	Q96GG9	DCNL1_HUMAN	DCN1-like protein 1	C (7)		3039	3346
CSE1L	C1	-0.802521	-0.553507	-1.42597	-1.25645	-0.813428	-1.08873	-0.0515208	-0.024576	0.0107118	0.0422673	-0.213062	0.0416791	0.647339	2.24932	0.0784852	1.59854	-0.019063	1.58048	-	+	STIC_Epithelium PAX8 pos	HALLMARK_E2F_TARGETS	-	-	-	-	-	+	1.71322	0.0368757	0.506227	2.78289	4.09293	0.000111369	P55060	P55060	XPO2_HUMAN	Exportin-2	C (7)		3040	1460
YBX1	C1	-0.456596	-1.46096	-1.59645	-0.988727	-0.8499	-1.15098	-0.654866	0.0213161	0.214089	-0.0762006	0.104202	0.0238334	1.00739	1.80365	0.665426	0.970055	1.21004	1.21467	-	+	STIC_Epithelium PAX8 pos	-	mRNA Splicing - Major Pathway;mRNA Splicing - Minor Pathway;Noncanonical activation of NOTCH3	WP_BRAINDERIVED_NEUROTROPHIC_FACTOR_BDNF_SIGNALING_PATHWAY;WP_MECP2_AND_ASSOCIATED_RETT_SYNDROME;WP_MRNA_PROCESSING;WP_SUDDEN_INFANT_DEATH_SYNDROME_SIDS_SUSCEPTIBILITY_PATHWAYS	-	-	-	+	3.90903	0.000868421	0.770159	6.05186	6.87595	0	P67809	P16989;P67809;Q9Y2T7	YBOX1_HUMAN	Y-box-binding protein 1	C (7)		3041	1621
RANGAP1	C1	-0.602394	-1.12104	-1.42058	-0.626885	-0.773317	-0.981666	-0.267472	-0.335815	-0.168385	-0.527753	-0.266553	-0.236581	1.31195	2.23451	0.360384	1.27519	0.984599	1.1618	-	+	STIC_Epithelium PAX8 pos	-	Amplification of signal from unattached kinetochores via a MAD2 inhibitory signal;Mitotic Prometaphase;Resolution of Sister Chromatid Cohesion;Rev-mediated nuclear export of HIV RNA;RHO GTPases Activate Formins;Separation of Sister Chromatids;SUMOylation of DNA replication proteins	WP_22Q112_COPY_NUMBER_VARIATION_SYNDROME;WP_IL18_SIGNALING_PATHWAY	-	-	-	+	3.89249	0.000883117	0.453046	6.0232	6.35212	3.02e-05	P46060	P46060	RAGP1_HUMAN	Ran GTPase-activating protein 1	C (7)		3042	1262
TRIM33	C1	-0.464839	-1.54284	-1.33053	-0.480753	-1.10533	-0.806638	-0.417445	-0.369677	0.413153	-0.144931	0.0714768	0.112871	0.0718954	2.46998	0.117278	1.11157	1.24987	1.04488	-	+	STIC_Epithelium PAX8 pos	HALLMARK_TGF_BETA_SIGNALING	Downregulation of SMAD2/3:SMAD4 transcriptional activity	WP_ECTODERM_DIFFERENTIATION	-	-	-	+	1.71985	0.0365673	0.298905	2.79179	3.75006	0.000642254	Q9UPN9	Q9UPN9	TRI33_HUMAN	E3 ubiquitin-protein ligase TRIM33	C (7)		3043	4448
UPF1	C1	-0.572314	-0.969169	-1.13861	-0.749188	-0.475115	-0.680208	-0.0763946	-0.172805	-0.0538137	0.0995111	0.0514801	0.160733	0.235699	3.20081	-0.710163	1.49351	0.103793	0.252241	-	-	-	HALLMARK_G2M_CHECKPOINT	Nonsense Mediated Decay (NMD) enhanced by the Exon Junction Complex (EJC);Nonsense Mediated Decay (NMD) independent of the Exon Junction Complex (EJC)	WP_DNA_IRDAMAGE_AND_CELLULAR_RESPONSE_VIA_ATR;WP_DNA_IRDOUBLE_STRAND_BREAKS_AND_CELLULAR_RESPONSE_VIA_ATM	-	-	-	+	0.67725	0.301002	0.202405	1.33886	1.72606	0.0186246	Q92900	Q92900	RENT1_HUMAN	Regulator of nonsense transcripts 1	C (7)		3044	3184
EIF5B	C1	-0.345244	-1.02347	-0.998019	-1.07186	-0.282645	-0.745869	-0.564836	0.0408406	-0.424171	-0.400995	-0.105352	-0.0752212	0.880352	1.93043	-0.34738	2.71619	0.267001	0.550252	-	+	STIC_Epithelium PAX8 pos	-	GTP hydrolysis and joining of the 60S ribosomal subunit	WP_CILIARY_LANDSCAPE;WP_TRANSLATION_FACTORS	-	-	-	+	1.62213	0.0441671	0.55729	2.66069	2.75771	0.00103028	O60841	O60841	IF2P_HUMAN	Eukaryotic translation initiation factor 5B	C (7)		3045	370
RRP36	C1	-0.6258	-0.956577	-0.906631	0.169651	-0.425684	-1.13715	1.10014	-0.82228	0.444351	-0.909512	0.494685	-1.83078	1.39812	1.8471	0.0745629	0.658505	0.578767	0.848532	-	-	-	-	Major pathway of rRNA processing in the nucleolus and cytosol;rRNA modification in the nucleus and cytosol	-	-	-	-	+	1.29571	0.084709	0.870099	2.22091	1.98891	0.00241076	Q96EU6	Q96EU6	RRP36_HUMAN	Ribosomal RNA processing protein 36 homolog	C (7)		3046	3318
BSG	C1	-0.899544	-0.687617	-0.799873	-0.706834	-0.536996	-1.07007	1.56045	-0.310391	-0.445277	-0.702293	-0.425901	-0.671471	1.11082	2.31872	-0.391372	0.63474	1.20837	0.814547	-	-	-	HALLMARK_HEME_METABOLISM;HALLMARK_UV_RESPONSE_UP	Basigin interactions;Degradation of the extracellular matrix;Integrin cell surface interactions;Proton-coupled monocarboxylate transport;Pyruvate metabolism	WP_IL18_SIGNALING_PATHWAY;WP_MATRIX_METALLOPROTEINASES;WP_SARSCOV2_INNATE_IMMUNITY_EVASION_AND_CELLSPECIFIC_IMMUNE_RESPONSE;WP_VEGFAVEGFR2_SIGNALING	-	-	-	+	1.29463	0.0849751	0.826817	2.21944	2.56077	0.000653558	P35613	P35613	BASI_HUMAN	Basigin	C (7)		3047	1170
PTDSS1	C1	-0.95152	-0.878646	-1.18149	-0.502565	-0.423961	-0.582253	1.09503	-0.815607	-0.82902	0.113628	0.995498	-0.955281	1.05479	1.10474	-1.13839	1.29277	1.32493	1.27734	-	-	-	-	Synthesis of PS	WP_GLYCEROLIPIDS_AND_GLYCEROPHOSPHOLIPIDS;WP_GLYCEROPHOSPHOLIPID_BIOSYNTHETIC_PATHWAY;WP_KENNEDY_PATHWAY_FROM_SPHINGOLIPIDS	-	-	-	+	0.856818	0.210671	0.867524	1.60737	1.88174	0.00242552	P48651	P48651	PTSS1_HUMAN	Phosphatidylserine synthase 1	C (7)		3048	1299
HIKESHI	C1	-0.132203	-0.730777	-1.29361	-1.90499	-1.27787	-1.43158	0.714418	0.304661	0.648403	0.588348	0.417686	0.0961914	1.75734	1.29217	-0.271819	0.897668	-0.168272	0.494233	-	-	-	-	Regulation of HSF1-mediated heat shock response	-	-	-	-	+	0.250143	0.666737	0.110727	0.599531	3.72824	0.000133999	Q53FT3	Q53FT3	HIKES_HUMAN	Protein Hikeshi	C (7)		3049	2233
PPA1	C1	-0.488798	-1.03086	-1.42565	-1.07076	-1.48449	-1.0896	0.545846	0.0341985	0.734526	0.725916	0.22955	-0.091948	1.37667	1.45043	-0.853385	1.37779	0.0234276	1.03713	Secretory_1;Secretory_2;Secretory_3	-	-	HALLMARK_MTORC1_SIGNALING	Cytosolic tRNA aminoacylation;Pyrophosphate hydrolysis	-	-	-	-	+	0.411785	0.49621	0.286218	0.903615	3.54415	0.000111111	Q15181	Q15181	IPYR_HUMAN	Inorganic pyrophosphatase	C (7)	+	3050	2047
NAA50	C1	0.122775	-1.19976	-1.32021	-0.512497	-1.63269	-1.16564	-0.0554823	-0.737817	0.390507	0.359	0.407333	0.28779	1.53961	1.72413	-0.219131	1.66972	-0.14533	0.487679	Unclassified_2	-	-	-	-	WP_METAPATHWAY_BIOTRANSFORMATION_PHASE_I_AND_II	-	-	-	+	0.967472	0.166675	0.185637	1.76641	2.7815	0.00370311	Q9GZZ1	Q9GZZ1	NAA50_HUMAN	N-alpha-acetyltransferase 50	C (7)		3051	3778
RBM28	C1	-1.12837	-0.87044	-1.46785	-0.878972	-1.25785	-1.60288	0.265249	0.427691	1.0785	0.175483	0.4707	0.710847	0.248203	1.3123	-0.473628	1.66627	0.497421	0.827331	-	-	-	-	Major pathway of rRNA processing in the nucleolus and cytosol	-	-	-	-	+	0.185403	0.744238	0.0769081	0.464085	4.76053	4.02e-05	Q9NW13	Q9NW13	RBM28_HUMAN	RNA-binding protein 28	C (7)		3052	4136
ENO1	C1	-1.10824	-0.476289	-1.5125	-0.805148	-1.48651	-1.65448	0.178577	0.395912	0.699292	0.437761	0.50942	0.342182	0.578274	1.50627	0.000707502	1.92408	0.231257	0.239429	Unclassified_3	-	-	HALLMARK_GLYCOLYSIS;HALLMARK_HYPOXIA;HALLMARK_MTORC1_SIGNALING	Gluconeogenesis;Glycolysis	WP_AEROBIC_GLYCOLYSIS;WP_CLEAR_CELL_RENAL_CELL_CARCINOMA_PATHWAYS;WP_GLYCOLYSIS_AND_GLUCONEOGENESIS;WP_GLYCOLYSIS_IN_SENESCENCE;WP_IL18_SIGNALING_PATHWAY;WP_METABOLIC_REPROGRAMMING_IN_COLON_CANCER	-	-	-	+	0.452691	0.460267	0.198143	0.974859	4.48322	3.37e-05	P06733	P06733	ENOA_HUMAN	Alpha-enolase	C (7)		3053	688
RPIA	C1	0.0463811	-0.959481	-1.38317	-0.886394	-1.98605	-1.61726	0.397366	0.561181	0.914046	0.651891	-0.000259287	0.343242	0.54136	1.3755	-0.382925	1.49409	0.386423	0.504054	-	-	-	-	Pentose phosphate pathway (hexose monophosphate shunt);RPIA deficiency: failed conversion of R5P to RU5P;RPIA deficiency: failed conversion of RU5P to R5P	WP_METABOLIC_REPROGRAMMING_IN_COLON_CANCER;WP_METABOLIC_REPROGRAMMING_IN_PANCREATIC_CANCER;WP_PENTOSE_PHOSPHATE_METABOLISM;WP_PENTOSE_PHOSPHATE_PATHWAY_IN_SENESCENT_CELLS	-	-	-	+	0.232948	0.686632	0.106595	0.564489	3.73807	0.000112291	P49247	P49247	RPIA_HUMAN	Ribose-5-phosphate isomerase	C (7)		3054	1310
DDX50	C1	-0.597292	-0.979738	-1.62961	-0.803211	-1.1145	-0.993537	-0.366506	0.153598	0.659847	0.0201664	0.222441	0.300102	1.02463	1.21518	-1.021	1.98357	0.786748	1.13911	-	-	-	-	-	-	-	-	-	+	0.848679	0.214434	0.373363	1.5955	3.27728	0.000262181	Q9BQ39	Q9BQ39	DDX50_HUMAN	ATP-dependent RNA helicase DDX50	C (7)		3055	3583
PES1	C1	-1.00548	-0.802903	-1.64021	-0.854715	-1.06085	-1.09167	-0.0671951	0.0490819	0.74407	0.402973	0.42313	0.318559	0.80848	1.90071	-0.992837	1.52458	0.920061	0.424224	-	-	-	HALLMARK_MYC_TARGETS_V2	Major pathway of rRNA processing in the nucleolus and cytosol	-	-	-	-	+	0.499868	0.421544	0.29093	1.05483	3.4105	0.000152305	O00541	O00541	PESC_HUMAN	Pescadillo homolog	C (7)		3056	140
STXBP6	C1	0.419475	-0.0199025	-0.997247	-0.150687	-1.37599	-1.92333	0.909945	-1.61226	0.385493	0.27411	-0.0211868	0.279529	0.874895	1.40591	-1.05199	0.887051	0.42451	1.29167	-	-	-	-	-	-	-	-	-	+	0.579489	0.363292	1.00931	1.18521	1.18534	0.0114655	Q8NFX7	Q8NFX7	STXB6_HUMAN	Syntaxin-binding protein 6	C (7)		3057	2974
HEATR3	C1	0.43075	-0.368215	-1.59564	-0.630449	-0.624835	-0.980808	-0.565829	-0.36162	0.206904	-0.260273	-0.44871	-0.357385	2.12292	1.32363	-0.93031	0.698099	0.416284	1.92549	-	+	STIC_Epithelium PAX8 pos	-	-	-	-	-	-	+	1.56838	0.0490225	0.668806	2.58858	2.08789	0.00285855	Q7Z4Q2	Q7Z4Q2	HEAT3_HUMAN	HEAT repeat-containing protein 3	C (7)		3058	2626
TBCC	C1	-0.337849	-0.18955	-0.944592	-0.0719432	-1.25017	-1.41875	-0.754837	-0.209514	-0.554166	-0.40474	-0.258258	0.0754573	2.23575	1.25541	-0.193075	1.03143	0.110067	1.87933	-	+	STIC_Epithelium PAX8 pos	-	Post-chaperonin tubulin folding pathway	-	-	-	-	+	2.20246	0.0143437	0.39818	3.44544	3.05821	0.00182407	Q15814	Q15814	TBCC_HUMAN	Tubulin-specific chaperone C	C (7)		3059	2106
JPT1	C1	-0.336175	-0.366916	-1.82297	-0.165139	-0.243444	-0.0789999	-1.06663	0.25407	-1.03974	-0.587028	-0.589365	-0.166881	2.01883	1.18659	-0.0583653	1.59547	-0.049288	1.51599	Unclassified_3	+	STIC_Epithelium PAX8 pos	HALLMARK_E2F_TARGETS;HALLMARK_G2M_CHECKPOINT	-	-	-	-	-	+	2.43049	0.00981407	0.964374	3.7618	2.72739	0.000604785	Q9UK76	Q9UK76	JUPI1_HUMAN	Jupiter microtubule associated homolog 1	C (7)		3060	4363
XPO5	C1	-0.851094	-0.923204	-1.08294	-0.72625	-1.217	-1.19402	-0.157275	-0.125034	-0.0492912	-0.146795	-0.444622	0.14007	2.08459	1.62027	-0.0403137	1.493	0.706922	0.91299	-	+	STIC_Epithelium PAX8 pos	-	MicroRNA (miRNA) biogenesis	WP_EXRNA_MECHANISM_OF_ACTION_AND_BIOGENESIS;WP_MIRNA_BIOGENESIS	-	-	-	+	2.56122	0.00798849	0.786812	3.94634	5.38605	0	Q9HAV4	Q9HAV4	XPO5_HUMAN	Exportin-5	C (7)		3061	3952
GIGYF2	C1	-0.686152	-1.4268	-1.75149	-0.347589	-0.522824	-0.380398	-0.946442	-0.427049	0.153616	-0.559803	-0.091052	0.346539	1.91884	1.29923	0.460149	1.62938	0.334331	0.997515	-	+	STIC_Epithelium PAX8 pos	-	-	WP_VEGFAVEGFR2_SIGNALING	-	-	-	+	2.73591	0.00572308	0.168362	4.19717	4.04871	0.00867822	Q6Y7W6	Q6Y7W6	GGYF2_HUMAN	GRB10-interacting GYF protein 2	C (7)		3062	2531
ABCF2	C1	0.938797	-1.34156	-1.6068	-0.924913	-0.583669	-0.371031	-0.00141769	-0.729578	0.140799	-0.404456	-0.457275	0.0171196	1.25525	0.91058	-0.129692	1.36287	-0.331024	2.25601	-	+	STIC_Epithelium PAX8 pos	HALLMARK_MTORC1_SIGNALING	-	WP_VEGFAVEGFR2_SIGNALING	-	-	-	+	1.6298	0.0434957	0.33085	2.67098	1.92582	0.0107401	Q9UG63	Q9UG63	ABCF2_HUMAN	ATP-binding cassette sub-family F member 2	C (7)		3063	4298
DNAJC2	C1	0.781424	-1.68838	-0.144735	-0.658551	-0.730924	-0.603559	-0.688117	-0.283511	-0.336554	-0.3516	-0.335025	-0.512973	1.04716	0.585306	-0.767389	2.18697	0.514562	1.9859	-	+	STIC_Epithelium PAX8 pos	-	Regulation of HSF1-mediated heat shock response	-	-	-	-	+	1.87779	0.0266958	0.423185	3.00414	1.97583	0.00868484	Q99543	Q99543	DNJC2_HUMAN	DnaJ homolog subfamily C member 2	C (7)		3064	3531
DDX20	C1	0.334735	-1.45399	-0.908101	0.146886	-0.485389	-0.662969	-1.20284	-0.26952	0.802491	-0.0960737	-1.00548	-0.276994	0.471545	2.16947	0.102627	-0.155681	0.262278	2.22701	-	-	-	-	snRNP Assembly	WP_MALE_INFERTILITY;WP_MRNA_PROCESSING	-	-	-	+	1.32728	0.0795734	0.274296	2.26376	1.57712	0.0313272	Q9UHI6	Q9UHI6	DDX20_HUMAN	Probable ATP-dependent RNA helicase DDX20	C (7)		3065	4318
PPP1R10	C1	-0.223865	-1.62683	-0.486929	0.00916781	-1.03378	-0.916606	-1.50961	0.000651457	0.0587742	-0.27713	0.666819	0.774007	0.820596	1.88335	0.0282155	-0.224162	-0.0591411	2.11647	-	-	-	-	-	WP_ENDOPLASMIC_RETICULUM_STRESS_RESPONSE_IN_CORONAVIRUS_INFECTION	-	-	-	+	0.786645	0.242868	0.207818	1.5042	1.5815	0.025771	Q96QC0	Q96QC0	PP1RA_HUMAN	Serine/threonine-protein phosphatase 1 regulatory subunit 10	C (7)		3066	3471
EIF2S3	C1	0.134238	-1.18256	-1.26435	-0.643878	-1.16893	-0.782861	-0.20933	-0.557295	-0.086465	-0.120986	-0.219945	0.37339	1.31917	2.04774	-0.343431	0.796301	-0.167629	2.07682	Secretory_3	-	-	HALLMARK_UV_RESPONSE_UP	ABC-family proteins mediated transport;Formation of the ternary complex, and subsequently, the 43S complex;GTP hydrolysis and joining of the 60S ribosomal subunit;L13a-mediated translational silencing of Ceruloplasmin expression;Recycling of eIF2:GDP;Ribosomal scanning and start codon recognition;Translation initiation complex formation	WP_NSP1_FROM_SARSCOV2_INHIBITS_TRANSLATION_INITIATION_IN_THE_HOST_CELL;WP_TRANSLATION_FACTORS	-	-	-	+	1.45717	0.0608167	0.326955	2.43914	2.70814	0.00271687	P41091	P41091	IF2G_HUMAN	Eukaryotic translation initiation factor 2 subunit 3	C (7)		3067	1215
EIF2S1	C1	-0.044904	-0.536364	-0.809429	-0.873335	-0.792574	-0.654871	-0.370374	-0.159186	-0.242458	-0.60483	-0.367639	0.264505	1.07112	2.084	-0.840315	1.17855	-0.636864	2.33497	-	-	-	HALLMARK_E2F_TARGETS;HALLMARK_MYC_TARGETS_V1;HALLMARK_UNFOLDED_PROTEIN_RESPONSE	ABC-family proteins mediated transport;Formation of the ternary complex, and subsequently, the 43S complex;GTP hydrolysis and joining of the 60S ribosomal subunit;L13a-mediated translational silencing of Ceruloplasmin expression;PERK regulates gene expression;Recycling of eIF2:GDP;Ribosomal scanning and start codon recognition;Translation initiation complex formation	WP_ALZHEIMERS_DISEASE;WP_ALZHEIMERS_DISEASE_AND_MIRNA_EFFECTS;WP_BRAINDERIVED_NEUROTROPHIC_FACTOR_BDNF_SIGNALING_PATHWAY;WP_EBOLA_VIRUS_INFECTION_IN_HOST;WP_ENDOPLASMIC_RETICULUM_STRESS_RESPONSE_IN_CORONAVIRUS_INFECTION;WP_MEASLES_VIRUS_INFECTION;WP_NONALCOHOLIC_FATTY_LIVER_DISEASE;WP_NSP1_FROM_SARSCOV2_INHIBITS_TRANSLATION_INITIATION_IN_THE_HOST_CELL;WP_TRANSLATION_FACTORS;WP_UNFOLDED_PROTEIN_RE…	-	-	-	+	1.12618	0.121047	0.275311	1.98867	1.77851	0.0192563	P05198	P05198	IF2A_HUMAN	Eukaryotic translation initiation factor 2 subunit 1	C (7)		3068	670
EIF2S2	C1	0.206776	-1.11277	-0.796039	0.292983	-0.956151	-0.909039	-0.457023	-0.0643113	0.0765913	-0.490361	-0.505703	-0.172583	0.996854	2.58014	-0.247048	1.08543	-1.08911	1.56136	-	-	-	HALLMARK_MTORC1_SIGNALING;HALLMARK_MYC_TARGETS_V1	ABC-family proteins mediated transport;Formation of the ternary complex, and subsequently, the 43S complex;GTP hydrolysis and joining of the 60S ribosomal subunit;L13a-mediated translational silencing of Ceruloplasmin expression;Recycling of eIF2:GDP;Ribosomal scanning and start codon recognition;Translation initiation complex formation	WP_BRAINDERIVED_NEUROTROPHIC_FACTOR_BDNF_SIGNALING_PATHWAY;WP_NSP1_FROM_SARSCOV2_INHIBITS_TRANSLATION_INITIATION_IN_THE_HOST_CELL;WP_TRANSLATION_FACTORS	-	-	-	+	1.1312	0.119666	0.267453	1.99561	1.47832	0.0336146	P20042	P20042	IF2B_HUMAN	Eukaryotic translation initiation factor 2 subunit 2	C (7)		3069	939
RAD9A	C1	-1.47474	0.184974	0.0621799	-0.937332	-1.19908	-0.336024	0.439434	-1.25264	0.633086	-0.662354	0.374645	-0.256261	1.16945	1.18819	1.4373	0.788141	-1.5062	1.34722	-	-	-	HALLMARK_P53_PATHWAY	Activation of ATR in response to replication stress;G2/M DNA damage checkpoint;HDR through Single Strand Annealing (SSA);Presynaptic phase of homologous DNA pairing and strand exchange;Processing of DNA double-strand break ends;Regulation of TP53 Activity through Phosphorylation	WP_ANDROGEN_RECEPTOR_SIGNALING_PATHWAY;WP_ATM_SIGNALING_PATHWAY;WP_ATR_SIGNALING;WP_DNA_DAMAGE_RESPONSE;WP_DNA_IRDAMAGE_AND_CELLULAR_RESPONSE_VIA_ATR;WP_DNA_IRDOUBLE_STRAND_BREAKS_AND_CELLULAR_RESPONSE_VIA_ATM;WP_MIRNA_REGULATION_OF_DNA_DAMAGE_RESPONSE	-	-	-	+	0.828397	0.223124	0.640815	1.56583	1.3105	0.0127341	Q99638	Q99638	RAD9A_HUMAN	Cell cycle checkpoint control protein RAD9A	C (7)		3070	3545
FBLIM1	C1	-0.0758977	0.166926	-1.02818	-0.876036	-1.26641	-0.636348	0.424538	-1.41264	0.843526	0.451023	0.414539	-1.34859	1.25801	0.946088	0.74653	1.64519	-1.19345	0.941184	-	-	-	-	Cell-extracellular matrix interactions	-	-	-	-	+	0.744096	0.263459	1.06072	1.44061	1.27637	0.00994912	Q8WUP2	Q8WUP2	FBLI1_HUMAN	Filamin-binding LIM protein 1	C (7)		3071	3074
PALD1	C1	-1.33349	0.476145	-0.48893	0.621116	-1.7742	-1.27293	-0.243501	-0.561231	0.0657164	0.751657	-0.547803	0.56772	0.397882	1.68897	0.746774	1.97245	-0.598059	-0.4683	-	-	-	-	-	-	-	-	-	+	0.623413	0.333783	0.312408	1.25503	1.05482	0.0355282	Q9ULE6	Q9ULE6	PALD_HUMAN	Paladin	C (7)		3072	4395
CTPS1	C1	-0.560672	0.136017	0.0226501	-0.00832345	-1.49874	-2.12872	-0.174869	-0.716344	0.0611685	-0.00884412	-0.225023	-0.22562	0.838119	1.96538	0.924461	1.939	-0.205969	-0.133666	-	+	STIC_Epithelium PAX8 pos	-	Interconversion of nucleotide di- and triphosphates	WP_PYRIMIDINE_METABOLISM	-	-	-	+	1.67668	0.0396565	0.658499	2.73386	1.97334	0.00325162	P17812	P17812	PYRG1_HUMAN	CTP synthase 1	C (7)		3073	901
INTS6	C1	-0.259352	-1.10718	-0.8519	-0.467559	-1.72325	-1.20617	-0.397601	-0.740917	0.390738	0.228168	0.495112	0.18862	-0.619844	0.684458	1.22644	1.63406	0.581951	1.94422	Secretory_2	-	-	-	RNA polymerase II transcribes snRNA genes	-	-	-	-	+	1.19297	0.105437	0.373518	2.08067	2.99063	0.000750459	Q9UL03	Q9UL03;Q5JSJ4	INT6_HUMAN	Integrator complex subunit 6	C (7)		3074	4385
INTS14	C1	-0.332564	-1.60942	-1.28335	-0.598298	-0.402911	-1.43134	-0.382008	-0.137391	0.0383428	0.21806	0.87228	0.506714	-1.14303	0.58242	0.917329	1.94874	0.936428	1.3	-	-	-	-	RNA polymerase II transcribes snRNA genes	-	-	-	-	+	0.609218	0.343363	0.232792	1.23261	2.44746	0.00224254	Q96SY0	Q96SY0	INT14_HUMAN	Integrator complex subunit 14	C (7)		3075	3511
RBM8A	C1	-0.047475	-1.483	-1.29073	-0.601887	-0.381819	-0.655482	-0.71515	-0.550662	0.266232	-0.164086	0.117623	-0.0450823	-0.790987	0.158582	1.41918	1.35442	1.01527	2.39506	-	-	-	-	Cleavage of Growing Transcript in the Termination Region;mRNA 3'-end processing;mRNA Splicing - Major Pathway;Nonsense Mediated Decay (NMD) enhanced by the Exon Junction Complex (EJC);Regulation of expression of SLITs and ROBOs;Transport of Mature mRNA derived from an Intron-Containing Transcript	-	-	-	-	+	1.36531	0.0735869	0.36713	2.31524	2.31605	0.00431352	Q9Y5S9	Q9Y5S9	RBM8A_HUMAN	RNA-binding protein 8A	C (7)		3076	4612
PAF1	C1	-0.411726	-1.23314	-1.71439	-0.143335	-0.427109	-1.05956	-0.8851	-0.110832	0.728332	0.0485064	-0.125756	-0.0951232	-0.410621	0.202981	1.81884	1.40398	0.404309	2.00974	-	-	-	-	E3 ubiquitin ligases ubiquitinate target proteins;Formation of RNA Pol II elongation complex;RNA Polymerase II Pre-transcription Events;RNA Polymerase II Transcription Elongation	WP_ENDODERM_DIFFERENTIATION	-	-	-	+	1.2578	0.0921429	0.201023	2.16932	2.49362	0.00942466	Q8N7H5	Q8N7H5	PAF1_HUMAN	RNA polymerase II-associated factor 1 homolog	C (7)		3077	2883
INTS5	C1	-0.358569	-2.14941	-1.64665	-0.1565	-0.631664	-0.346206	-0.680184	-0.37771	0.774365	0.167011	0.177959	0.468379	-0.312582	-0.0147757	1.14093	1.72219	0.530591	1.69283	-	-	-	-	RNA polymerase II transcribes snRNA genes	-	-	-	-	+	0.918975	0.184357	0.239095	1.6972	2.2516	0.00461954	Q6P9B9	Q6P9B9	INT5_HUMAN	Integrator complex subunit 5	C (7)		3078	2487
INTS13	C1	-0.547535	-1.35827	-2.00002	-0.648781	-0.460995	-0.80487	-0.415215	0.208688	0.7794	0.127992	0.597252	0.375923	-0.93619	0.219877	0.875729	1.82151	0.418743	1.74677	-	-	-	-	RNA polymerase II transcribes snRNA genes	-	-	-	-	+	0.41167	0.496174	0.15439	0.903412	2.4466	0.00263568	Q9NVM9	Q9NVM9	INT13_HUMAN	Integrator complex subunit 13	C (7)		3079	4124
INTS11	C1	0.0492774	-0.864516	-1.99797	-1.09867	-0.497396	-0.661224	-0.451941	-0.0245727	0.761871	0.0996214	0.430542	0.702264	-1.08163	0.097686	0.460564	2.39604	0.422332	1.25773	-	-	-	-	RNA polymerase II transcribes snRNA genes	-	-	-	-	+	0.281448	0.630842	0.119987	0.661793	1.65512	0.0132366	Q5TA45	Q5TA45	INT11_HUMAN	Integrator complex subunit 11	C (7)		3080	2339
RPRD1B	C1	-0.404934	-1.45604	-2.14809	-0.649174	-0.2662	-0.626	0.0651328	0.372686	0.829277	-0.183609	-0.154581	0.658476	-1.17448	0.856102	1.16896	1.48929	0.147739	1.47544	-	-	-	-	RNA polymerase II transcribes snRNA genes	WP_MODULATORS_OF_TCR_SIGNALING_AND_T_CELL_ACTIVATION	-	-	-	+	0.394194	0.513063	0.102165	0.872372	2.13445	0.00966537	Q9NQG5	Q9NQG5	RPR1B_HUMAN	Regulation of nuclear pre-mRNA domain-containing protein 1B	C (7)		3081	4021
INTS1	C1	-0.338833	-0.699975	-1.71921	-0.2886	-0.490992	-0.529951	-1.20558	-0.155344	0.526753	-0.151716	0.384114	0.13797	-0.895353	0.316573	1.62577	2.09873	-0.302178	1.68782	-	-	-	-	RNA polymerase II transcribes snRNA genes	-	-	-	-	+	0.776535	0.247167	0.204425	1.48917	1.48239	0.033657	Q8N201	Q8N201	INT1_HUMAN	Integrator complex subunit 1	C (7)		3082	2833
SUPT6H	C1	-0.300455	-0.896315	-1.60235	-0.340095	-0.787979	-1.43058	-0.388222	0.336793	0.858159	0.127545	0.234658	0.371222	-0.906323	-0.47572	1.38727	1.91628	0.205089	1.69103	-	-	-	-	Formation of RNA Pol II elongation complex;RNA Polymerase II Pre-transcription Events;RNA Polymerase II Transcription Elongation	-	-	-	-	+	0.321166	0.588277	0.0739683	0.738222	1.93291	0.024094	Q7KZ85	Q7KZ85	SPT6H_HUMAN	Transcription elongation factor SPT6	C (7)		3083	2579
RBM17	C1	-0.580649	-1.04245	-1.91572	-0.877604	-0.74211	-1.11973	-0.43963	0.158918	0.121931	-0.300135	0.221583	0.386858	0.357164	0.751157	0.307193	1.67845	0.969229	2.06554	-	+	STIC_Epithelium PAX8 pos	-	mRNA Splicing - Major Pathway	WP_MRNA_PROCESSING	-	-	-	+	1.96099	0.0226449	0.340639	3.11645	4.57999	0.000127907	Q96I25	Q96I25	SPF45_HUMAN	Splicing factor 45	C (7)		3084	3373
U2SURP	C1	-0.415145	-1.02687	-1.95132	-1.02069	-1.16026	-1.1618	-0.0200403	-0.000946216	0.26478	0.0268178	0.0417718	0.241898	0.317052	0.566207	0.746592	1.39484	1.27155	1.88556	-	+	STIC_Epithelium PAX8 pos	-	mRNA Splicing - Major Pathway	-	-	-	-	+	2.47273	0.0092231	0.33963	3.82115	5.63132	2.98e-05	O15042	O15042	SR140_HUMAN	U2 snRNP-associated SURP motif-containing protein	C (7)		3085	204
SRRT	C1	-0.292632	-1.27247	-1.86168	-0.809031	-0.895018	-1.06886	-0.0387957	0.0899435	0.350084	-0.238991	-0.066436	-0.012429	0.234702	0.787496	0.308222	2.17952	1.0579	1.54848	-	+	STIC_Epithelium PAX8 pos	-	mRNA Splicing - Major Pathway;RNA polymerase II transcribes snRNA genes	-	-	-	-	+	2.0095	0.02048	0.343352	3.18215	4.43375	0.000142661	Q9BXP5	Q9BXP5	SRRT_HUMAN	Serrate RNA effector molecule homolog	C (7)		3086	3711
LUC7L2	C1	-0.273966	-1.44979	-1.89781	-0.634997	-0.751311	-1.37877	-0.15721	-0.263672	0.214014	-0.0805608	0.166865	0.0951499	0.17967	1.46182	0.854181	1.54102	0.994617	1.38073	-	+	STIC_Epithelium PAX8 pos	-	-	-	-	-	-	+	3.1391	0.00297574	0.391305	4.79788	5.2912	4.61e-05	Q9Y383	Q9NQ29;Q9Y383	LC7L2_HUMAN	Putative RNA-binding protein Luc7-like 2	C (7)		3087	4533
CHD4	C1	-0.656445	-1.21339	-1.48252	-0.65192	-1.2524	-1.27383	-0.162502	-0.182046	0.074876	-0.129445	0.0849612	-0.0331228	0.269421	0.993206	1.11574	1.67753	1.19538	1.62651	-	+	STIC_Epithelium PAX8 pos	-	ERCC6 (CSB) and EHMT2 (G9a) positively regulate rRNA expression;HDACs deacetylate histones;Regulation of PTEN gene transcription;Regulation of TP53 Activity through Acetylation;RNA Polymerase I Transcription Initiation	WP_EFFECT_OF_PROGERIN_ON_GENES_INVOLVED_IN_HUTCHINSONGILFORD_PROGERIA_SYNDROME;WP_RETT_SYNDROME_CAUSING_GENES	-	-	-	+	3.65308	0.00132653	0.57231	5.6173	6.9903	0	Q14839	Q14839	CHD4_HUMAN	Chromodomain-helicase-DNA-binding protein 4	C (7)		3088	2002
CDK11B	C1	-0.252783	-1.27977	-1.48257	-1.4135	-0.491692	-0.810481	-0.137519	-0.112102	0.146234	-0.0852619	-0.816333	-0.264824	0.445614	1.49854	0.725383	1.70669	1.11207	1.51232	-	+	STIC_Epithelium PAX8 pos	-	-	-	-	-	-	+	3.69067	0.00119149	0.431236	5.67994	5.55423	5.04e-05	P21127	Q9UQ88;P21127	CD11B_HUMAN	Cyclin-dependent kinase 11B	C (7)		3089	957
IPO8	C1	-0.540428	-0.801183	-1.62274	-0.765814	-0.599324	-0.816461	-0.0397452	-0.906072	-0.0327445	-0.264808	-0.21617	-0.24789	0.506459	1.04793	0.222634	2.37527	1.10105	1.60003	-	+	STIC_Epithelium PAX8 pos	-	Transcriptional regulation by small RNAs	-	-	-	-	+	2.71951	0.00594975	0.588344	4.1734	4.49825	9.42e-05	O15397	O15397	IPO8_HUMAN	Importin-8	C (7)		3090	240
XPO1	C1	-0.103936	-0.690673	-1.72065	-0.960987	-1.05025	-0.87946	-0.0160946	-0.830448	0.0825498	-0.012532	-0.341736	-0.0905346	0.61652	0.256116	0.714086	2.16634	1.12557	1.73613	-	+	STIC_Epithelium PAX8 pos	HALLMARK_E2F_TARGETS;HALLMARK_G2M_CHECKPOINT;HALLMARK_MYC_TARGETS_V1	Amplification of signal from unattached kinetochores via a MAD2 inhibitory signal;Cyclin A/B1/B2 associated events during G2/M transition;Deactivation of the beta-catenin transactivating complex;Downregulation of TGF-beta receptor signaling;HuR (ELAVL1) binds and stabilizes mRNA;MAPK6/MAPK4 signaling;Mitotic Prometaphase;NEP/NS2 Interacts with the Cellular Export Machinery;Resolution of Sister Ch…	WP_22Q112_COPY_NUMBER_VARIATION_SYNDROME	+	Cancer-related genes, FDA approved drug targets	2	+	2.58683	0.00766222	0.325313	3.9828	4.26248	0.000516708	O14980	O14980	XPO1_HUMAN	Exportin-1	C (7)		3091	198
SMARCA5	C1	-0.367253	-1.06225	-1.76006	-0.520683	-0.734158	-0.883603	-0.22387	-0.190368	-0.459289	-0.392157	-0.195977	-0.113258	0.429368	0.247418	1.07283	2.12638	1.36084	1.66608	-	+	STIC_Epithelium PAX8 pos	-	B-WICH complex positively regulates rRNA expression;Deposition of new CENPA-containing nucleosomes at the centromere;NoRC negatively regulates rRNA expression;Recruitment and ATM-mediated phosphorylation of repair and signaling proteins at DNA double strand breaks	WP_7Q1123_COPY_NUMBER_VARIATION_SYNDROME	-	-	-	+	3.08548	0.00310553	0.354361	4.71606	4.78404	0.000257461	O60264	O60264;P28370	SMCA5_HUMAN	SWI/SNF-related matrix-associated actin-dependent regulator of chromatin subfamily A member 5	C (7)		3092	336
TRRAP	C1	-0.430604	-0.560936	-1.94521	-0.363874	-0.612562	-1.05334	-0.308117	-0.172393	0.661009	-0.43088	-0.335038	-0.22124	0.133614	-0.128879	1.63817	2.32568	0.43576	1.36884	-	+	STIC_Epithelium PAX8 pos	-	Formation of the beta-catenin:TCF transactivating complex;HATs acetylate histones;Ub-specific processing proteases	WP_RETT_SYNDROME_CAUSING_GENES	-	-	-	+	1.55927	0.0496794	0.215688	2.57635	2.78684	0.00710115	Q9Y4A5	Q9Y4A5	TRRAP_HUMAN	Transformation/transcription domain-associated protein	C (7)		3093	4565
DMAP1	C1	-1.15513	-1.43203	-2.17237	-0.199166	-0.137289	-0.445937	-0.286921	0.31979	0.372747	-0.540265	-0.336583	0.297011	0.486491	-0.029405	1.15816	1.99768	1.19319	0.910029	-	+	STIC_Epithelium PAX8 pos	-	HATs acetylate histones	-	-	-	-	+	1.88345	0.0263672	0.253397	3.01176	3.16658	0.00199849	Q9NPF5	Q9NPF5	DMAP1_HUMAN	DNA methyltransferase 1-associated protein 1	C (7)		3094	4003
SRRM2	C1	-0.090607	-0.993906	-1.55669	-0.578095	0.146184	-0.695679	-0.828174	-0.104543	0.044701	-0.387507	-0.286316	-0.252487	-0.509924	0.75809	-0.0781778	2.65334	1.54895	1.21084	-	-	-	-	mRNA Splicing - Major Pathway	-	-	-	-	+	1.54177	0.0511226	0.404125	2.55286	2.11202	0.0062902	Q9UQ35	Q9UQ35	SRRM2_HUMAN	Serine/arginine repetitive matrix protein 2	C (7)		3095	4463
CWC22	C1	-0.292528	-0.785976	-1.98554	-0.0089863	-0.914707	-1.09817	-0.295702	-0.759515	0.438829	0.0938238	0.222293	-0.364105	-0.146789	0.260443	0.760566	1.79912	2.09768	0.979263	-	+	STIC_Epithelium PAX8 pos	-	mRNA Splicing - Major Pathway	-	-	-	-	+	1.64646	0.0422588	0.315147	2.69333	2.84191	0.00227333	Q9HCG8	Q9HCG8	CWC22_HUMAN	Pre-mRNA-splicing factor CWC22 homolog	C (7)		3096	3975
NDRG3	C1	-1.27242	-0.529269	-1.13564	-0.988912	-0.947896	-1.71988	0.723919	-0.253034	0.0194737	0.105244	0.673118	-0.0815349	0.164426	1.63644	0.374408	1.64056	0.0487641	1.54223	-	-	-	-	-	-	-	-	-	+	1.10418	0.126691	0.323366	1.9582	4.2253	0.000101266	Q9UGV2	Q9UGV2	NDRG3_HUMAN	Protein NDRG3	C (7)		3097	4308
PCK2	C1	-1.18768	-0.648877	-1.14904	-0.795359	-1.54454	-1.33531	0.0751726	0.215902	-0.279769	0.381743	0.172083	0.542036	-0.196935	1.58282	0.263666	1.36167	0.659865	1.88255	-	-	-	-	Gluconeogenesis	WP_ADIPOGENESIS;WP_DNA_DAMAGE_RESPONSE_ONLY_ATM_DEPENDENT;WP_KREBS_CYCLE_DISORDERS;WP_PI3KAKT_SIGNALING_PATHWAY;WP_PPAR_SIGNALING_PATHWAY;WP_TRANSCRIPTION_FACTOR_REGULATION_IN_ADIPOGENESIS	-	-	-	+	1.21408	0.100782	0.462187	2.10961	4.50714	3.39e-05	Q16822	Q16822	PCKGM_HUMAN	Phosphoenolpyruvate carboxykinase [GTP], mitochondrial	C (7)		3098	2149
RTF2	C1	-0.84845	-1.02557	-0.490089	-1.29758	-0.500867	-1.21929	-0.455103	0.305907	-0.380474	-0.171158	0.35612	-0.16401	-0.638311	1.43189	1.09104	2.06871	0.215526	1.72171	-	-	-	-	-	-	-	-	-	+	1.45644	0.0609327	0.374665	2.43815	3.20943	0.000798918	Q9BY42	Q9BY42	RTF2_HUMAN	Replication termination factor 2	C (7)		3099	3718
RNGTT	C1	-1.79195	-1.1921	-0.415705	-1.40495	-0.546085	-0.758008	0.372151	-0.59986	1.47553	0.0545448	-0.0186882	0.681029	-0.797459	0.781545	0.892999	1.61094	0.515719	1.14035	-	-	-	-	mRNA Capping;RNA Pol II CTD phosphorylation and interaction with CE;RNA Pol II CTD phosphorylation and interaction with CE during HIV infection	WP_CILIARY_LANDSCAPE;WP_MRNA_PROCESSING	-	-	-	+	0.366876	0.540161	0.218591	0.823071	2.7647	0.000587952	O60942	O60942	MCE1_HUMAN	mRNA-capping enzyme	C (7)		3100	381
RBM23	C1	-1.98355	-1.84256	-1.49164	-0.107851	-0.00862703	0.0641762	0.206463	-0.151969	0.637258	0.320267	0.490622	0.672651	-0.28586	-0.637437	0.938206	1.74983	0.119432	1.31059	-	-	-	-	-	-	-	-	-	+	0.164772	0.77104	0.0990321	0.418722	1.82623	0.00473448	Q86U06	Q86U06	RBM23_HUMAN	Probable RNA-binding protein 23	C (7)		3101	2656
PPP1CC	C1	-0.716792	-1.47971	-1.72917	-1.03456	0.341044	-0.472738	0.626112	-0.411782	0.310698	0.284738	0.124249	-0.0797414	-0.300151	-0.396164	1.82431	2.22929	0.121462	0.758904	-	-	-	-	Amplification of signal from unattached kinetochores via a MAD2 inhibitory signal;Circadian Clock;Downregulation of TGF-beta receptor signaling;Mitotic Prometaphase;Resolution of Sister Chromatid Cohesion;RHO GTPases Activate Formins;Separation of Sister Chromatids;Triglyceride catabolism	WP_CIRCADIAN_RHYTHM_GENES;WP_COMMON_PATHWAYS_UNDERLYING_DRUG_ADDICTION;WP_ENDOPLASMIC_RETICULUM_STRESS_RESPONSE_IN_CORONAVIRUS_INFECTION;WP_FOCAL_ADHESION;WP_HIPPOMERLIN_SIGNALING_DYSREGULATION;WP_NEUROINFLAMMATION_AND_GLUTAMATERGIC_SIGNALING	-	-	-	+	0.579978	0.362892	0.140283	1.18599	1.87352	0.0160948	P36873	P36873	PP1G_HUMAN	Serine/threonine-protein phosphatase PP1-gamma catalytic subunit	C (7)		3102	1180
GATAD2B	C1	-1.06417	-0.92177	-1.38627	-0.648495	-0.445144	-1.35333	-0.703244	-0.273246	0.141183	-0.0885354	0.0651183	0.148604	0.353069	0.266575	1.75124	1.1676	0.815588	2.17522	-	+	STIC_Epithelium PAX8 pos	-	ERCC6 (CSB) and EHMT2 (G9a) positively regulate rRNA expression;HDACs deacetylate histones;Regulation of PTEN gene transcription;Regulation of TP53 Activity through Acetylation;RNA Polymerase I Transcription Initiation	-	-	-	-	+	2.28164	0.0125502	0.635241	3.55457	4.57979	4.75e-05	Q8WXI9	Q8WXI9	P66B_HUMAN	Transcriptional repressor p66-beta	C (7)		3103	3118
TPR	C1	-0.530655	-1.19895	-1.90716	-0.423445	-0.639964	-1.44098	-0.490911	0.132071	-0.211748	-0.286589	0.121931	0.49335	0.701715	0.245039	1.15781	1.28921	1.09977	1.88949	-	+	STIC_Epithelium PAX8 pos	-	ARMS-mediated activation;Defective TPR may confer susceptibility towards thyroid papillary carcinoma (TPC);Frs2-mediated activation;ISG15 antiviral mechanism;NEP/NS2 Interacts with the Cellular Export Machinery;NGF-independant TRKA activation;NS1 Mediated Effects on Host Pathways;Nuclear import of Rev protein;Nuclear Pore Complex (NPC) Disassembly;PI3K/AKT activation;PLC-gamma1 signalling;Regulat…	-	-	-	-	+	2.66714	0.00654945	0.266459	4.09781	4.78364	0.000292463	P12270	P12270	TPR_HUMAN	Nucleoprotein TPR	C (7)		3104	821
SF3B6	C1	-0.242231	-1.247	-1.4984	-0.66195	-0.336932	-1.54728	-1.09119	0.31037	0.343483	-0.249005	-0.100997	-0.209737	0.461487	1.19176	1.06742	0.767745	0.936516	2.10594	-	+	STIC_Epithelium PAX8 pos	-	mRNA Splicing - Major Pathway;mRNA Splicing - Minor Pathway	-	-	-	-	+	2.61353	0.00731411	0.289693	4.02092	4.2423	0.000663869	Q9Y3B4	Q9Y3B4	SF3B6_HUMAN	Splicing factor 3B subunit 6	C (7)		3105	4539
PARP1	C1	-0.763506	-0.971424	-1.68469	-1.0222	-1.26212	-1.25314	0.0218473	-0.0414562	0.301423	0.0681141	0.182309	0.194355	0.229421	0.812696	1.01885	1.20076	0.910562	2.0582	-	+	STIC_Epithelium PAX8 pos	-	DNA Damage Recognition in GG-NER;Downregulation of SMAD2/3:SMAD4 transcriptional activity;Dual Incision in GG-NER;Formation of Incision Complex in GG-NER;HDR through MMEJ (alt-NHEJ);POLB-Dependent Long Patch Base Excision Repair;SUMOylation of DNA damage response and repair proteins	WP_ACUTE_VIRAL_MYOCARDITIS;WP_BASE_EXCISION_REPAIR;WP_BREAST_CANCER_PATHWAY;WP_CORTICOTROPINRELEASING_HORMONE_SIGNALING_PATHWAY;WP_DNA_IRDAMAGE_AND_CELLULAR_RESPONSE_VIA_ATR;WP_DNA_IRDOUBLE_STRAND_BREAKS_AND_CELLULAR_RESPONSE_VIA_ATM;WP_DNA_REPAIR_PATHWAYS_FULL_NETWORK;WP_FAS_LIGAND_PATHWAY_AND_STRESS_INDUCTION_OF_HEAT_SHOCK_PROTEINS;WP_IL18_SIGNALING_PATHWAY;WP_JOUBERT_SYNDROME;WP_MALE_INFERTILI…	+	Cancer-related genes, FDA approved drug targets	1	+	2.36838	0.0107843	0.759353	3.67498	6.41043	0	P09874	P09874	PARP1_HUMAN	Poly [ADP-ribose] polymerase 1	C (7)		3106	757
MTA2	C1	-0.905913	-1.1554	-1.7518	-0.749563	-1.04266	-0.989652	-0.138083	0.0662308	-0.0151526	0.0307991	0.115101	0.00989682	0.276553	0.585099	1.27974	1.19416	1.07739	2.11326	-	+	STIC_Epithelium PAX8 pos	-	ERCC6 (CSB) and EHMT2 (G9a) positively regulate rRNA expression;HDACs deacetylate histones;Regulation of PTEN gene transcription;Regulation of TP53 Activity through Acetylation;RNA Polymerase I Transcription Initiation	WP_EFFECT_OF_PROGERIN_ON_GENES_INVOLVED_IN_HUTCHINSONGILFORD_PROGERIA_SYNDROME	-	-	-	+	2.68203	0.00642697	0.634075	4.11926	6.05194	0	O94776	O94776	MTA2_HUMAN	Metastasis-associated protein MTA2	C (7)		3107	490
GMPS	C1	-0.749953	-1.01886	-1.70896	-0.744547	-1.00181	-1.49194	0.0727322	-0.172809	0.108146	0.201609	0.0701473	0.0722247	0.485864	0.643849	1.45506	0.911926	0.767617	2.09971	-	+	STIC_Epithelium PAX8 pos	HALLMARK_HEME_METABOLISM;HALLMARK_MTORC1_SIGNALING	Purine ribonucleoside monophosphate biosynthesis	-	-	-	-	+	2.56825	0.00786107	0.485758	3.95634	5.9792	0	P49915	P49915	GUAA_HUMAN	GMP synthase [glutamine-hydrolyzing]	C (7)		3108	1347
RALY	C1	-0.835037	-1.06459	-1.68053	-0.806146	-1.24713	-1.02104	-0.214276	0.697754	0.219841	0.359418	-0.463845	0.367145	-0.0365743	0.697734	1.59524	0.917696	0.549656	1.96469	Unclassified_3	-	-	-	-	-	-	-	-	+	1.34545	0.0765892	0.465312	2.28837	4.65554	3.06e-05	Q9UKM9	Q9UKM9	RALY_HUMAN	RNA-binding protein Raly	C (7)		3109	4377
IRF2BP2	C1	-0.864878	-1.65991	-1.44767	-0.581572	-0.567893	-1.07864	-0.0518219	0.390685	-0.289778	0.151029	-0.269774	0.122583	0.0811354	0.606849	1.39541	0.601525	1.20801	2.25471	-	+	STIC_Epithelium PAX8 pos	-	-	-	-	-	-	+	1.92903	0.0241935	0.547151	3.07326	4.48281	4.6e-05	Q7Z5L9	Q7Z5L9	I2BP2_HUMAN	Interferon regulatory factor 2-binding protein 2	C (7)		3110	2632
RFC3	C1	-1.41838	-1.48039	-1.15758	-0.691429	-0.594013	-1.63122	0.180423	0.618827	0.644917	-0.155324	0.442488	-0.730451	0.505509	0.945733	1.27372	1.32494	1.00934	0.912885	-	+	STIC_Epithelium PAX8 pos	HALLMARK_DNA_REPAIR;HALLMARK_E2F_TARGETS	Activation of ATR in response to replication stress;Dual Incision in GG-NER;Dual incision in TC-NER;G2/M DNA damage checkpoint;Gap-filling DNA repair synthesis and ligation in GG-NER;Gap-filling DNA repair synthesis and ligation in TC-NER;HDR through Homologous Recombination (HRR);HDR through Single Strand Annealing (SSA);PCNA-Dependent Long Patch Base Excision Repair;Polymerase switching;Polymer…	WP_DNA_MISMATCH_REPAIR;WP_DNA_REPAIR_PATHWAYS_FULL_NETWORK;WP_DNA_REPLICATION;WP_GASTRIC_CANCER_NETWORK_2;WP_NUCLEOTIDE_EXCISION_REPAIR;WP_NUCLEOTIDE_EXCISION_REPAIR_IN_XERODERMA_PIGMENTOSUM;WP_RETINOBLASTOMA_GENE_IN_CANCER	-	-	-	+	2.12064	0.0165126	0.352519	3.33337	5.8924	1.66e-05	P40938	P40938	RFC3_HUMAN	Replication factor C subunit 3	C (7)		3111	1213
MBD3	C1	-0.78322	-1.43104	-1.06161	-0.0731527	-0.511689	-2.21963	-0.704546	-0.026389	0.395781	0.106639	0.276999	0.0609178	0.120993	0.703189	1.48095	1.45635	1.04133	1.16814	-	+	STIC_Epithelium PAX8 pos	-	ERCC6 (CSB) and EHMT2 (G9a) positively regulate rRNA expression;HDACs deacetylate histones;Regulation of PTEN gene transcription;Regulation of TP53 Activity through Acetylation;RNA Polymerase I Transcription Initiation	WP_CYTOSINE_METHYLATION;WP_EFFECT_OF_PROGERIN_ON_GENES_INVOLVED_IN_HUTCHINSONGILFORD_PROGERIA_SYNDROME	-	-	-	+	2.39761	0.0103081	0.739738	3.71577	4.05575	4.61e-05	O95983	O95983	MBD3_HUMAN	Methyl-CpG-binding domain protein 3	C (7)		3112	594
IPO9	C1	-1.20977	-0.852149	-1.40828	-1.268	-1.35234	-1.00832	0.0486096	0.0754104	0.0885327	-0.0346888	0.0897583	0.256224	0.745182	0.605647	1.53703	1.70039	0.735104	1.25166	-	+	STIC_Epithelium PAX8 pos	-	-	-	-	-	-	+	3.40469	0.00203802	0.603444	5.213	8.25041	0	Q96P70	Q96P70	IPO9_HUMAN	Importin-9	C (7)		3113	3454
RFC4	C1	-1.21702	-1.05222	-1.2396	-0.974936	-1.23987	-1.11511	-0.254561	0.0332284	-2.59e-05	-0.249567	0.111017	0.206061	0.948014	0.648948	1.86715	1.1206	1.20279	1.20511	-	+	STIC_Epithelium PAX8 pos	HALLMARK_DNA_REPAIR;HALLMARK_MYC_TARGETS_V1;HALLMARK_SPERMATOGENESIS;HALLMARK_UV_RESPONSE_UP	Activation of ATR in response to replication stress;Dual Incision in GG-NER;Dual incision in TC-NER;G2/M DNA damage checkpoint;Gap-filling DNA repair synthesis and ligation in GG-NER;Gap-filling DNA repair synthesis and ligation in TC-NER;HDR through Homologous Recombination (HRR);HDR through Single Strand Annealing (SSA);PCNA-Dependent Long Patch Base Excision Repair;Polymerase switching;Polymer…	WP_DNA_MISMATCH_REPAIR;WP_DNA_REPAIR_PATHWAYS_FULL_NETWORK;WP_DNA_REPLICATION;WP_GASTRIC_CANCER_NETWORK_2;WP_NUCLEOTIDE_EXCISION_REPAIR;WP_NUCLEOTIDE_EXCISION_REPAIR_IN_XERODERMA_PIGMENTOSUM;WP_RETINOBLASTOMA_GENE_IN_CANCER	-	-	-	+	4.19175	0.000603774	0.662595	6.55521	9.06376	0	P35249	P35249	RFC4_HUMAN	Replication factor C subunit 4	C (7)		3114	1157
UBE2E2	C1	-0.784563	-0.817911	-1.60324	-0.988525	-1.26193	-1.08139	-0.488299	-0.537126	0.605359	-0.234007	-0.0154696	0.319099	0.912343	0.70318	1.15573	1.54197	1.2668	1.30799	-	+	STIC_Epithelium PAX8 pos	-	Antigen processing: Ubiquitination & Proteasome degradation	-	-	-	-	+	3.54232	0.00142222	0.682838	5.43499	7.05511	0	Q96LR5	Q96LR5;Q969T4;P51965	UB2E2_HUMAN	Ubiquitin-conjugating enzyme E2 E2	C (7)		3115	3414
SMARCA4	C1	-0.901159	-0.929942	-1.31882	-0.995833	-1.51804	-0.990356	0.127835	-0.0948921	0.069537	-0.266257	0.0403713	0.258552	0.0167354	0.873477	1.58279	1.79218	1.36889	0.884925	-	+	STIC_Epithelium PAX8 pos	-	Chromatin modifying enzymes;Formation of the beta-catenin:TCF transactivating complex;Interleukin-7 signaling;RMTs methylate histone arginines;RUNX1 interacts with co-factors whose precise effect on RUNX1 targets is not known	WP_HEMATOPOIETIC_STEM_CELL_GENE_REGULATION_BY_GABP_ALPHABETA_COMPLEX;WP_PREIMPLANTATION_EMBRYO;WP_RETT_SYNDROME_CAUSING_GENES;WP_THERMOGENESIS;WP_TUMOR_SUPPRESSOR_ACTIVITY_OF_SMARCB1	-	-	-	+	2.53591	0.00826853	0.365334	3.91041	6.19926	2.93e-05	P51532	P51531;P51532	SMCA4_HUMAN	Transcription activator BRG1	C (7)		3116	1377
STMN1	C1	-1.00722	-0.822803	-1.25781	-0.903264	-0.707889	-1.05722	-0.304909	-0.435833	-0.0800919	-0.466474	-0.440651	-0.116853	1.04913	1.1107	1.80844	1.60266	0.600902	1.42919	Unclassified_3	+	STIC_Epithelium PAX8 pos	HALLMARK_E2F_TARGETS;HALLMARK_G2M_CHECKPOINT;HALLMARK_GLYCOLYSIS	-	WP_EGFEGFR_SIGNALING_PATHWAY;WP_IL18_SIGNALING_PATHWAY;WP_MAPK_SIGNALING_PATHWAY;WP_MICROTUBULE_CYTOSKELETON_REGULATION;WP_RAC1PAK1P38MMP2_PATHWAY;WP_REGULATORY_CIRCUITS_OF_THE_STAT3_SIGNALING_PATHWAY;WP_RETINOBLASTOMA_GENE_IN_CANCER	-	-	-	+	5.04157	0.000333333	2.0106	8.23933	8.42117	0	P16949	P16949	STMN1_HUMAN	Stathmin	C (7)		3117	886
XPOT	C1	-0.488624	-0.751316	-1.49683	-0.872351	-1.24141	-0.667517	-0.0449618	-0.394789	-0.236768	-0.768187	-0.292599	-0.156213	1.04948	1.33176	1.61477	1.81028	0.451588	1.15368	-	+	STIC_Epithelium PAX8 pos	HALLMARK_MYC_TARGETS_V1;HALLMARK_UNFOLDED_PROTEIN_RESPONSE	tRNA processing in the nucleus	-	-	-	-	+	4.45093	0.000810127	0.645397	7.04009	6.70131	0	O43592	O43592	XPOT_HUMAN	Exportin-T	C (7)		3118	291
NAMPT	C1	-0.738389	-1.06353	-1.0116	-1.25869	-1.22738	-1.09404	-0.126158	-0.0266456	0.00247018	-0.340002	-0.387614	0.126237	1.01737	1.59205	1.97343	1.02038	0.671218	0.870887	Secretory_3	+	STIC_Epithelium PAX8 pos	HALLMARK_INFLAMMATORY_RESPONSE;HALLMARK_INTERFERON_GAMMA_RESPONSE;HALLMARK_MTORC1_SIGNALING;HALLMARK_TNFA_SIGNALING_VIA_NFKB	BMAL1:CLOCK,NPAS2 activates circadian gene expression;Nicotinamide salvaging	WP_ADIPOGENESIS;WP_CALORIC_RESTRICTION_AND_AGING;WP_CIRCADIAN_RHYTHM_GENES;WP_NAD_BIOSYNTHETIC_PATHWAYS;WP_NAD_METABOLISM;WP_NAD_METABOLISM_IN_ONCOGENEINDUCED_SENESCENCE_AND_MITOCHONDRIAL_DYSFUNCTIONASSOCIATED_SENESCENCE;WP_NAD_METABOLISM_SIRTUINS_AND_AGING;WP_TRYPTOPHAN_CATABOLISM_LEADING_TO_NAD_PRODUCTION	-	-	-	+	3.9211	0.000891892	0.898989	6.07285	7.73139	0	P43490	P43490	NAMPT_HUMAN	Nicotinamide phosphoribosyltransferase	C (7)		3119	1251
FEN1	C1	-0.921034	-0.727192	-0.774646	-1.10058	-1.15665	-1.43169	-0.531921	-0.0690379	-0.131029	-0.179568	-0.240438	0.0841682	0.945208	1.10779	2.27648	1.01935	0.960127	0.870661	Unclassified_3	+	STIC_Epithelium PAX8 pos	HALLMARK_DNA_REPAIR;HALLMARK_UV_RESPONSE_UP	Early Phase of HIV Life Cycle;HDR through MMEJ (alt-NHEJ);PCNA-Dependent Long Patch Base Excision Repair;POLB-Dependent Long Patch Base Excision Repair;Removal of the Flap Intermediate;Removal of the Flap Intermediate from the C-strand	WP_BASE_EXCISION_REPAIR;WP_DNA_IRDAMAGE_AND_CELLULAR_RESPONSE_VIA_ATR;WP_DNA_REPAIR_PATHWAYS_FULL_NETWORK	-	-	-	+	3.80567	0.000970414	1.13075	5.87407	6.98181	0	P39748	P39748	FEN1_HUMAN	Flap endonuclease 1	C (7)		3120	1201
RFC2	C1	-0.92637	-0.528733	-1.0856	-1.00093	-1.57282	-1.32753	-0.0595744	-0.334178	0.381883	-0.533515	-0.047808	0.214745	0.648147	0.948348	1.93841	0.88722	0.962855	1.43546	-	+	STIC_Epithelium PAX8 pos	HALLMARK_DNA_REPAIR;HALLMARK_E2F_TARGETS	Activation of ATR in response to replication stress;Dual Incision in GG-NER;Dual incision in TC-NER;G2/M DNA damage checkpoint;Gap-filling DNA repair synthesis and ligation in GG-NER;Gap-filling DNA repair synthesis and ligation in TC-NER;HDR through Homologous Recombination (HRR);HDR through Single Strand Annealing (SSA);PCNA-Dependent Long Patch Base Excision Repair;Polymerase switching;Polymer…	WP_7Q1123_COPY_NUMBER_VARIATION_SYNDROME;WP_DNA_MISMATCH_REPAIR;WP_DNA_REPAIR_PATHWAYS_FULL_NETWORK;WP_DNA_REPLICATION;WP_NUCLEOTIDE_EXCISION_REPAIR;WP_NUCLEOTIDE_EXCISION_REPAIR_IN_XERODERMA_PIGMENTOSUM	-	-	-	+	3.32525	0.00233103	0.523276	5.08706	6.50617	0	P35250	P35250	RFC2_HUMAN	Replication factor C subunit 2	C (7)		3121	1158
MED17	C1	-0.955999	-1.77704	-0.997422	-0.147803	-1.92957	-0.641059	-0.152637	0.183713	0.0263783	-0.268571	0.229593	-0.0446022	0.570971	1.26336	1.56062	1.15769	0.807808	1.11457	-	+	STIC_Epithelium PAX8 pos	-	Generic Transcription Pathway;PPARA activates gene expression;Transcriptional regulation of white adipocyte differentiation	-	-	-	-	+	4.2592	0.000646465	0.336871	6.67915	5.56334	5.01e-05	Q9NVC6	Q9NVC6	MED17_HUMAN	Mediator of RNA polymerase II transcription subunit 17	C (7)		3122	4112
SF3B3	C1	0.148499	-0.844759	-2.54138	-1.03646	-0.778842	-0.66661	-0.381472	0.14687	0.73978	-0.264651	-0.232559	-0.0795175	0.495609	1.06716	1.01068	0.980634	0.423543	1.81348	-	+	STIC_Epithelium PAX8 pos	HALLMARK_MYC_TARGETS_V1	mRNA Splicing - Major Pathway;mRNA Splicing - Minor Pathway	WP_MRNA_PROCESSING	-	-	-	+	2.38762	0.0104679	0.213998	3.70181	3.41542	0.00229054	Q15393	Q15393	SF3B3_HUMAN	Splicing factor 3B subunit 3	C (7)		3123	2069
SF3B1	C1	0.010183	-1.08371	-2.43599	-0.904442	-0.479437	-0.905901	-0.557434	0.245659	0.696935	0.00979463	0.00447276	-0.140003	-0.0252437	1.07161	1.07409	0.617967	0.882159	1.91928	-	+	STIC_Epithelium PAX8 pos	-	B-WICH complex positively regulates rRNA expression;mRNA Splicing - Major Pathway;mRNA Splicing - Minor Pathway	WP_7Q1123_COPY_NUMBER_VARIATION_SYNDROME;WP_MRNA_PROCESSING	-	-	-	+	1.74999	0.0343761	0.203129	2.83224	3.24966	0.00244227	O75533	O75533	SF3B1_HUMAN	Splicing factor 3B subunit 1	C (7)		3124	431
FDPS	C1	-0.505387	-0.740008	-2.28337	-1.0011	-1.16362	-0.401854	-0.0742083	-0.541495	0.501599	0.489206	0.259926	-0.621803	1.0065	1.11696	0.923097	0.324612	0.949926	1.76101	-	+	STIC_Epithelium PAX8 pos	HALLMARK_CHOLESTEROL_HOMEOSTASIS;HALLMARK_MYOGENESIS;HALLMARK_PEROXISOME	Activation of gene expression by SREBF (SREBP);Cholesterol biosynthesis	WP_CHOLESTEROL_BIOSYNTHESIS_PATHWAY;WP_CHOLESTEROL_METABOLISM;WP_CHOLESTEROL_METABOLISM_WITH_BLOCH_AND_KANDUTSCHRUSSELL_PATHWAYS;WP_CHOLESTEROL_SYNTHESIS_DISORDERS;WP_MEVALONATE_ARM_OF_CHOLESTEROL_BIOSYNTHESIS_PATHWAY;WP_MEVALONATE_PATHWAY;WP_STEROL_REGULATORY_ELEMENTBINDING_PROTEINS_SREBP_SIGNALING	+	Disease variant, FDA approved drug targets	1	+	2.35255	0.0110809	0.575329	3.65294	4.22777	5.68e-05	P14324	P14324	FPPS_HUMAN	Farnesyl pyrophosphate synthase	C (7)		3125	844
RBM39	C1	-0.16996	-1.63293	-2.18439	-0.703021	-0.923178	-0.887776	-0.613117	0.332523	0.805401	0.0257782	0.276221	0.0774246	0.857441	0.532774	1.60149	0.425132	0.950132	1.23005	-	+	STIC_Epithelium PAX8 pos	-	-	WP_MRNA_PROCESSING;WP_VEGFAVEGFR2_SIGNALING	-	-	-	+	1.87365	0.026879	0.219496	2.99855	4.25893	0.000323789	Q14498	Q14498	RBM39_HUMAN	RNA-binding protein 39	C (7)		3126	1975
HDGF	C1	-0.3071	-1.53931	-1.97013	-0.709605	-0.947326	-1.04301	-0.566789	-0.161859	0.610398	0.354612	0.6117	0.151954	0.514945	0.378361	1.64212	0.278487	1.14085	1.56171	-	-	-	HALLMARK_HEME_METABOLISM;HALLMARK_MYC_TARGETS_V1	XBP1(S) activates chaperone genes	WP_IL18_SIGNALING_PATHWAY	-	-	-	+	1.43533	0.0632607	0.346279	2.40973	4.19875	0.000109804	P51858	P51858	HDGF_HUMAN	Hepatoma-derived growth factor	C (7)		3127	1395
TOP2B	C1	-0.132922	-0.991926	-1.95296	-0.484744	-0.836078	-1.07584	-0.71603	-0.423177	0.280922	-0.162319	0.163407	-0.139574	0.80981	0.893332	1.98865	0.494291	0.440481	1.84467	-	+	STIC_Epithelium PAX8 pos	-	SUMOylation of DNA replication proteins	-	+	Autism spectrum disorder, Disease variant, FDA approved drug targets	3	+	2.57829	0.00778331	0.437387	3.97063	4.07861	0.000228081	Q02880	Q02880	TOP2B_HUMAN	DNA topoisomerase 2-beta	C (7)		3128	1720
NUP133	C1	-0.254749	-0.817624	-2.47735	-0.482878	-0.831753	-0.75625	-0.258831	-0.049292	-0.219245	-0.526316	-0.298169	0.296931	1.00986	1.0272	0.630885	1.46787	0.947252	1.59247	-	+	STIC_Epithelium PAX8 pos	-	-	-	-	-	-	+	4.42367	0.0008	0.268211	6.98798	4.6149	0.000642857	Q8WUM0	Q8WUM0	NU133_HUMAN	Nuclear pore complex protein Nup133	C (7)		3129	3072
NUP107	C1	-0.547242	-0.882473	-1.96477	-0.927836	-1.17498	-0.77545	-0.530622	-0.21522	-0.00505223	-0.227224	-0.108976	0.31921	1.24889	0.965081	0.791984	1.3219	1.05638	1.6564	-	+	STIC_Epithelium PAX8 pos	HALLMARK_E2F_TARGETS	Amplification of signal from unattached kinetochores via a MAD2 inhibitory signal;ISG15 antiviral mechanism;Mitotic Prometaphase;NEP/NS2 Interacts with the Cellular Export Machinery;NS1 Mediated Effects on Host Pathways;Nuclear import of Rev protein;Nuclear Pore Complex (NPC) Disassembly;Regulation of Glucokinase by Glucokinase Regulatory Protein;Regulation of HSF1-mediated heat shock response;Re…	WP_GASTRIC_CANCER_NETWORK_1	-	-	-	+	4.78071	0.000255319	0.261151	7.69259	6.83966	0.000123401	P57740	P57740	NU107_HUMAN	Nuclear pore complex protein Nup107	C (7)		3130	1496
PABPC1	C1	-0.408719	-1.24129	-1.67437	-0.626029	-0.761766	-1.01837	-0.759354	0.05226	-0.304649	-0.249759	-0.343005	-0.18658	1.44877	1.03848	1.21046	1.05489	1.42458	1.34446	Unclassified_2	+	STIC_Epithelium PAX8 pos	HALLMARK_MYC_TARGETS_V1;HALLMARK_PEROXISOME	AUF1 (hnRNP D0) binds and destabilizes mRNA;Deadenylation of mRNA;L13a-mediated translational silencing of Ceruloplasmin expression;Nonsense Mediated Decay (NMD) enhanced by the Exon Junction Complex (EJC);Nonsense Mediated Decay (NMD) independent of the Exon Junction Complex (EJC);Regulation of expression of SLITs and ROBOs;Translation initiation complex formation	WP_ACUTE_VIRAL_MYOCARDITIS;WP_ENDODERM_DIFFERENTIATION;WP_TRANSLATION_FACTORS;WP_VEGFAVEGFR2_SIGNALING	-	-	-	+	6.47965	0	0.477531	11.8401	7.77368	0	P11940	P11940;Q9H361	PABP1_HUMAN	Polyadenylate-binding protein 1	C (7)		3131	813
HM13	C1	-0.0950372	-0.641082	-2.12271	-0.941843	-1.49854	-0.384887	0.00955883	0.519419	-0.806439	-0.0132278	0.0208799	-0.501464	0.568245	0.650638	1.42048	1.24667	1.25277	1.31656	-	+	STIC_Epithelium PAX8 pos	-	-	-	-	-	-	+	3.26241	0.0024129	0.532668	4.98853	4.27847	0.000104101	Q8TCT9	Q8TCT9	HM13_HUMAN	Minor histocompatibility antigen H13	C (7)		3132	3020
STRAP	C1	-0.365824	-1.22052	-1.23654	-0.886973	-0.860982	-1.04241	-0.198096	-0.718659	0.527258	0.427998	-0.0410758	-0.227367	0.580111	0.56439	1.77932	2.4768	-0.0121925	0.454756	-	-	-	-	Downregulation of TGF-beta receptor signaling	WP_EPITHELIAL_TO_MESENCHYMAL_TRANSITION_IN_COLORECTAL_CANCER;WP_TGFBETA_SIGNALING_PATHWAY	-	-	-	+	1.39607	0.0688642	0.331031	2.35679	3.36559	0.000750803	Q9Y3F4	Q9Y3F4	STRAP_HUMAN	Serine-threonine kinase receptor-associated protein	C (7)		3133	4552
EIF4A1	C1	-0.42436	-0.555908	-1.31487	-1.18492	-1.06921	-1.0002	-0.411069	-0.39352	0.213806	-0.0413303	-0.0730858	-0.185169	1.45233	0.434164	0.884633	2.51971	-0.031363	1.18036	-	+	STIC_Epithelium PAX8 pos	HALLMARK_MYC_TARGETS_V1;HALLMARK_UNFOLDED_PROTEIN_RESPONSE	Activation of the mRNA upon binding of the cap-binding complex and eIFs, and subsequent binding to 43S;Deadenylation of mRNA;GTP hydrolysis and joining of the 60S ribosomal subunit;ISG15 antiviral mechanism;L13a-mediated translational silencing of Ceruloplasmin expression;Ribosomal scanning and start codon recognition;Translation initiation complex formation	WP_FRAGILE_X_SYNDROME;WP_INTERFERON_TYPE_I_SIGNALING_PATHWAYS;WP_TRANSLATION_FACTORS;WP_TRANSLATION_INHIBITORS_IN_CHRONICALLY_ACTIVATED_PDGFRA_CELLS	-	-	-	+	2.07334	0.018009	0.486507	3.26889	4.10334	0.000142077	P60842	P60842	IF4A1_HUMAN	Eukaryotic initiation factor 4A-I	C (7)		3134	1512
PWP1	C1	-0.120514	-1.3299	-2.04028	-0.52761	-0.947386	-0.368845	-0.82683	-0.238262	0.289059	0.18853	0.507198	-0.316939	1.24665	0.359564	1.02254	2.34743	0.374035	0.381555	-	+	STIC_Epithelium PAX8 pos	HALLMARK_MYC_TARGETS_V1	-	-	-	-	-	+	1.66416	0.0405976	0.296008	2.71708	3.00604	0.00187956	Q13610	Q13610	PWP1_HUMAN	Periodic tryptophan protein 1 homolog	C (7)		3135	1909
SENP3	C1	-0.380702	-0.549525	-2.04765	-1.64157	-0.976612	-0.884062	-0.200325	-0.00835318	1.04703	-0.265022	-0.154491	0.179644	1.04904	0.766543	0.844886	1.77709	0.542206	0.901871	-	+	STIC_Epithelium PAX8 pos	-	Major pathway of rRNA processing in the nucleolus and cytosol	-	-	-	-	+	2.11394	0.0167323	0.363623	3.32423	4.57262	8.64e-05	Q9H4L4	Q9H4L4	SENP3_HUMAN	Sentrin-specific protease 3	C (7)		3136	3870
RAMAC	C1	-0.515787	-1.31188	-2.22298	-0.72038	-1.0676	-0.551039	0.355039	-0.346672	0.920967	-0.178309	0.00104526	0.083652	1.36428	0.694524	0.973824	1.85772	0.252869	0.410734	-	-	-	-	-	-	-	-	-	+	1.54014	0.0512554	0.338527	2.55067	4.0268	0.000135021	Q9BTL3	Q9BTL3	RAMAC_HUMAN	RNA guanine-N7 methyltransferase activating subunit	C (7)		3137	3645
CDK13	C1	-0.063182	-1.12942	-1.50955	-1.53683	-0.947123	-0.205084	-0.711203	0.267977	1.30997	0.207258	0.5803	-0.918978	0.0615317	1.14393	1.54875	1.13912	-0.432229	1.19477	-	-	-	HALLMARK_UV_RESPONSE_DN	Neutrophil degranulation;TP53 Regulates Transcription of DNA Repair Genes	-	-	-	-	+	0.724187	0.274036	0.113405	1.41055	2.27583	0.0192352	Q14004	Q14004	CDK13_HUMAN	Cyclin-dependent kinase 13	C (7)		3138	1935
PBRM1	C1	-0.16579	-1.23981	-1.59157	-1.14729	-1.31422	-0.779182	-0.71054	0.0757959	0.486838	0.185466	-0.154897	0.326834	0.650152	0.0429759	1.68511	1.8666	0.897496	0.886032	-	+	STIC_Epithelium PAX8 pos	-	RMTs methylate histone arginines;RUNX1 interacts with co-factors whose precise effect on RUNX1 targets is not known	WP_CLEAR_CELL_RENAL_CELL_CARCINOMA_PATHWAYS	-	-	-	+	1.85633	0.02772	0.300995	2.97523	4.36518	0.000221675	Q86U86	Q86U86	PB1_HUMAN	Protein polybromo-1	C (7)		3139	2661
INTS3	C1	-0.46696	-1.36755	-1.48834	-0.802544	-0.727496	-1.01289	-0.61642	-0.292691	0.306173	0.269721	0.258774	0.0479969	-0.106229	0.495775	2.30171	1.77455	0.520071	0.906349	-	-	-	-	RNA polymerase II transcribes snRNA genes	-	-	-	-	+	1.4945	0.0561615	0.39514	2.48935	3.68815	0.000259497	Q68E01	Q68E01	INT3_HUMAN	Integrator complex subunit 3	C (7)		3140	2410
HDAC2	C1	-0.0767591	-0.703276	-1.39336	-1.097	-0.814241	-1.58705	-0.476715	-0.340261	0.403095	-0.0202157	0.248331	-0.368446	0.43087	0.433434	1.92047	1.832	1.41979	0.189345	-	+	STIC_Epithelium PAX8 pos	HALLMARK_MYC_TARGETS_V1;HALLMARK_WNT_BETA_CATENIN_SIGNALING	Constitutive Signaling by NOTCH1 HD+PEST Domain Mutants;Constitutive Signaling by NOTCH1 PEST Domain Mutants;ERCC6 (CSB) and EHMT2 (G9a) positively regulate rRNA expression;Factors involved in megakaryocyte development and platelet production;HDACs deacetylate histones;NoRC negatively regulates rRNA expression;NOTCH1 Intracellular Domain Regulates Transcription;p75NTR negatively regulates cell cy…	WP_7Q1123_COPY_NUMBER_VARIATION_SYNDROME;WP_CELL_CYCLE;WP_CILIARY_LANDSCAPE;WP_CIRCADIAN_RHYTHM_GENES;WP_EFFECT_OF_PROGERIN_ON_GENES_INVOLVED_IN_HUTCHINSONGILFORD_PROGERIA_SYNDROME;WP_ETHANOL_EFFECTS_ON_HISTONE_MODIFICATIONS;WP_INITIATION_OF_TRANSCRIPTION_AND_TRANSLATION_ELONGATION_AT_THE_HIV1_LTR;WP_NEURAL_CREST_DIFFERENTIATION;WP_NOTCH_SIGNALING;WP_NOTCH_SIGNALING_PATHWAY;WP_SARSCOV2_INNATE_IMM…	+	Cancer-related genes, FDA approved drug targets	6	+	2.04814	0.0190671	0.706941	3.23461	3.90429	8.86e-05	Q92769	Q92769	HDAC2_HUMAN	Histone deacetylase 2	C (7)		3141	3165
MSH6	C1	-0.713533	-1.2214	-1.66703	-0.154058	-1.25695	-1.24066	-0.256451	-0.120802	0.184414	-0.286674	0.226361	0.499806	0.167269	0.387089	2.18645	1.26871	1.09002	0.907436	-	+	STIC_Epithelium PAX8 pos	-	Defective Mismatch Repair Associated With MSH2;Defective Mismatch Repair Associated With MSH6;Mismatch repair (MMR) directed by MSH2:MSH6 (MutSalpha)	WP_CHROMOSOMAL_AND_MICROSATELLITE_INSTABILITY_IN_COLORECTAL_CANCER;WP_DNA_MISMATCH_REPAIR;WP_DNA_REPAIR_PATHWAYS_FULL_NETWORK;WP_GLIOBLASTOMA_SIGNALING_PATHWAYS;WP_INTEGRATED_CANCER_PATHWAY;WP_RETINOBLASTOMA_GENE_IN_CANCER	-	-	-	+	1.88173	0.0265262	0.383917	3.00944	4.35986	0.000118092	P52701	P52701	MSH6_HUMAN	DNA mismatch repair protein Msh6	C (7)		3142	1410
MSH2	C1	-0.582211	-0.836792	-1.35305	-0.343104	-1.59201	-1.56677	-0.387288	-0.146875	0.452982	-0.162545	0.170366	0.714949	0.0179145	0.578412	2.26657	1.10396	0.86282	0.802682	-	-	-	HALLMARK_E2F_TARGETS;HALLMARK_PEROXISOME	Defective Mismatch Repair Associated With MSH2;Defective Mismatch Repair Associated With MSH3;Defective Mismatch Repair Associated With MSH6;Mismatch repair (MMR) directed by MSH2:MSH3 (MutSbeta);Mismatch repair (MMR) directed by MSH2:MSH6 (MutSalpha);TP53 Regulates Transcription of DNA Repair Genes	WP_CHROMOSOMAL_AND_MICROSATELLITE_INSTABILITY_IN_COLORECTAL_CANCER;WP_CILIARY_LANDSCAPE;WP_DNA_IRDAMAGE_AND_CELLULAR_RESPONSE_VIA_ATR;WP_DNA_MISMATCH_REPAIR;WP_DNA_REPAIR_PATHWAYS_FULL_NETWORK;WP_INTEGRATED_CANCER_PATHWAY;WP_P53_TRANSCRIPTIONAL_GENE_NETWORK;WP_RAC1PAK1P38MMP2_PATHWAY	-	-	-	+	1.41259	0.0664663	0.266678	2.37908	3.93198	0.000331322	P43246	P43246	MSH2_HUMAN	DNA mismatch repair protein Msh2	C (7)		3143	1246
APEX1	C1	-0.693001	-1.04902	-1.59737	-0.875558	-1.16522	-1.08547	0.149759	0.19909	0.375627	0.227236	0.218655	0.143779	0.243779	0.417349	2.84598	0.539424	0.612353	0.492609	-	-	-	HALLMARK_FATTY_ACID_METABOLISM;HALLMARK_MYC_TARGETS_V1	Abasic sugar-phosphate removal via the single-nucleotide replacement pathway;Displacement of DNA glycosylase by APEX1;PCNA-Dependent Long Patch Base Excision Repair;POLB-Dependent Long Patch Base Excision Repair;Resolution of Abasic Sites (AP sites);Resolution of AP sites via the multiple-nucleotide patch replacement pathway	WP_BASE_EXCISION_REPAIR;WP_DNA_REPAIR_PATHWAYS_FULL_NETWORK;WP_SPINAL_CORD_INJURY;WP_THYROID_STIMULATING_HORMONE_TSH_SIGNALING_PATHWAY	-	-	-	+	0.844861	0.216134	0.711789	1.58993	3.78295	4.71e-05	P27695	P27695	APEX1_HUMAN	DNA-(apurinic or apyrimidinic site) endonuclease	C (7)		3144	1048
MED23	C1	-0.731416	-0.123145	-1.54383	-0.977046	-1.86043	-0.98275	0.419094	-0.281321	0.140414	-0.0570713	-0.0854692	0.100819	0.560059	0.105168	1.69374	1.87495	0.597932	1.1503	-	+	STIC_Epithelium PAX8 pos	-	Generic Transcription Pathway;PPARA activates gene expression;Transcriptional regulation of white adipocyte differentiation	-	-	-	-	+	2.01194	0.020427	0.268336	3.18546	4.27106	0.000318056	Q9ULK4	Q9ULK4	MED23_HUMAN	Mediator of RNA polymerase II transcription subunit 23	C (7)		3145	4401
CDK2	C1	-0.669539	-0.54781	-1.31934	-1.15635	-1.61612	-0.949974	-0.162204	-0.375834	-0.037668	0.00156166	-0.025735	0.0360154	0.618437	0.790581	1.87786	1.89457	0.725833	0.915713	-	+	STIC_Epithelium PAX8 pos	HALLMARK_APOPTOSIS;HALLMARK_MYC_TARGETS_V1;HALLMARK_PI3K_AKT_MTOR_SIGNALING;HALLMARK_UV_RESPONSE_UP	Activation of ATR in response to replication stress;Activation of the pre-replicative complex;CDK-mediated phosphorylation and removal of Cdc6;Cyclin A/B1/B2 associated events during G2/M transition;Cyclin A:Cdk2-associated events at S phase entry;Cyclin E associated events during G1/S transition;DNA Damage/Telomere Stress Induced Senescence;Factors involved in megakaryocyte development and plate…	WP_ARYL_HYDROCARBON_RECEPTOR_PATHWAY_WP2586;WP_ATM_SIGNALING_PATHWAY;WP_CELL_CYCLE;WP_DNA_DAMAGE_RESPONSE;WP_DNA_IRDAMAGE_AND_CELLULAR_RESPONSE_VIA_ATR;WP_DNA_REPLICATION;WP_G1_TO_S_CELL_CYCLE_CONTROL;WP_GLIOBLASTOMA_SIGNALING_PATHWAYS;WP_ID_SIGNALING_PATHWAY;WP_INTEGRATED_CANCER_PATHWAY;WP_MALIGNANT_PLEURAL_MESOTHELIOMA;WP_MEASLES_VIRUS_INFECTION;WP_MIRNA_REGULATION_OF_DNA_DAMAGE_RESPONSE;WP_NRP…	-	-	-	+	3.24465	0.00251757	1.11881	4.96085	6.04336	0	P24941	P24941;Q00526	CDK2_HUMAN	Cyclin-dependent kinase 2	C (7)		3146	1009
ZNF219	C1	-0.828498	-0.222022	-1.07973	-1.63796	-1.91345	-0.669691	0.443076	-0.032687	0.260971	0.0751829	0.264361	0.152423	0.328785	0.43519	2.40765	1.10992	0.772971	0.133509	-	-	-	-	-	WP_ECTODERM_DIFFERENTIATION;WP_IL18_SIGNALING_PATHWAY	-	-	-	+	1.08959	0.130496	0.937497	1.93792	3.63725	4.66e-05	Q9P2Y4	Q9P2Y4	ZN219_HUMAN	Zinc finger protein 219	C (7)		3147	4262
C19orf47	C1	0.157285	-0.855472	-1.70364	-2.01503	-0.0931612	-1.08427	0.0383973	0.613682	0.210845	-0.61186	-0.0150607	0.0438917	0.929156	-0.35796	1.84941	1.16328	0.732969	0.997541	-	-	-	-	-	-	-	-	-	+	1.50333	0.0550651	0.41289	2.50122	2.86057	0.000705009	Q8N9M1	Q8N9M1	CS047_HUMAN	Uncharacterized protein C19orf47	C (7)		3148	2896
FAM117B	C1	0.27218	-0.606529	-2.14048	-1.84492	0.210759	-0.716942	-0.762092	0.0993469	0.155439	-0.170995	-0.134735	0.167314	0.695921	0.0810783	1.33595	2.02214	0.850121	0.486444	-	+	STIC_Epithelium PAX8 pos	-	-	-	-	-	-	+	2.05847	0.0186607	0.539692	3.24865	2.43123	0.0014978	Q6P1L5	Q6P1L5	F117B_HUMAN	Protein FAM117B	C (7)		3149	2466
SAP30BP	C1	-0.561548	-1.11137	-1.43222	-1.06761	-0.784273	-1.41919	-0.560119	1.00169	-0.209478	-0.462067	-0.096619	0.343431	0.64073	0.954015	1.18914	1.96479	0.672716	0.937979	-	+	STIC_Epithelium PAX8 pos	-	NoRC negatively regulates rRNA expression	-	-	-	-	+	2.17404	0.0150845	0.359143	3.40644	5.1631	6.61e-05	Q9UHR5	Q9UHR5	S30BP_HUMAN	SAP30-binding protein	C (7)		3150	4328
H1-5	C1	-0.273651	-1.13742	-1.2881	-1.59202	0.135716	-2.07755	0.13649	0.485477	-0.375798	-0.203166	-0.0155349	0.469849	0.282244	0.920497	1.26872	1.50616	1.09658	0.661505	-	+	STIC_Epithelium PAX8 pos	-	Activation of DNA fragmentation factor;Formation of Senescence-Associated Heterochromatin Foci (SAHF)	-	-	-	-	+	2.46184	0.00939559	1.34098	3.80582	3.98568	2.89e-05	P16401	P16401	H15_HUMAN	Histone H1.5	C (7)		3151	879
UPF2	C1	-0.587586	-0.926671	-1.40391	-0.671953	-0.276155	-0.306305	-0.152469	-0.211723	0.0559076	0.208786	0.482384	0.265159	0.740399	-0.658964	-0.950846	3.08602	0.143912	1.16401	-	-	-	-	Nonsense Mediated Decay (NMD) enhanced by the Exon Junction Complex (EJC);Regulation of expression of SLITs and ROBOs	-	-	-	-	+	0.348573	0.558414	0.161001	0.789466	1.14596	0.0436479	Q9HAU5	Q9HAU5	RENT2_HUMAN	Regulator of nonsense transcripts 2	C (7)		3152	3950
SGPL1	C1	-0.952611	-0.883213	-0.750522	-0.593382	-0.71551	-0.800734	-0.392993	-0.176375	-0.224636	-0.102708	-0.144788	-0.302024	2.10493	-0.253442	-0.301707	2.52289	0.988872	0.977958	-	+	STIC_Epithelium PAX8 pos	-	Sphingolipid de novo biosynthesis	WP_KENNEDY_PATHWAY_FROM_SPHINGOLIPIDS;WP_METABOLISM_OF_SPHINGOLIPIDS_IN_ER_AND_GOLGI_APPARATUS;WP_SPHINGOLIPID_METABOLISM_INTEGRATED_PATHWAY;WP_SPHINGOLIPID_METABOLISM_OVERVIEW;WP_SPHINGOLIPID_PATHWAY	-	-	-	+	1.55642	0.0499271	0.596536	2.57252	2.91604	0.000638037	O95470	O95470	SGPL1_HUMAN	Sphingosine-1-phosphate lyase 1	C (7)		3153	554
KLHL14	C1	-0.92952	-0.590803	-1.48216	-1.27901	-1.10032	-1.23562	0.520392	-0.129648	-0.0401515	-0.201739	0.257397	0.0461316	0.757302	0.451024	0.361508	2.11111	0.812674	1.67143	-	+	STIC_Epithelium PAX8 pos	-	-	-	-	-	-	+	1.94149	0.0236814	0.805009	3.0901	5.30724	0	Q9P2G3	Q9P2G3	KLH14_HUMAN	Kelch-like protein 14	C (7)		3154	4247
DARS1	C1	-0.699874	-0.866806	-1.5752	-0.952537	-1.07364	-1.05089	0.643737	-0.207567	0.107185	-0.00530054	0.0864488	0.409263	0.241677	0.433836	0.161053	2.55002	0.165632	1.63297	-	-	-	HALLMARK_ALLOGRAFT_REJECTION	Cytosolic tRNA aminoacylation;SeMet incorporation into proteins	-	-	-	-	+	0.867386	0.205839	0.20983	1.62274	3.44976	0.00080467	P14868	P14868	SYDC_HUMAN	Aspartate--tRNA ligase, cytoplasmic	C (7)		3155	856
GTF2I	C1	-0.890882	-1.07645	-1.63106	-0.79332	-1.19306	-1.35926	0.21835	-0.0607938	0.154692	0.195197	0.309221	0.374645	0.530839	0.248661	1.07638	2.17629	0.402605	1.31794	-	-	-	-	-	WP_7Q1123_COPY_NUMBER_VARIATION_SYNDROME;WP_B_CELL_RECEPTOR_SIGNALING_PATHWAY;WP_GENETIC_CAUSES_OF_PORTOSINUSOIDAL_VASCULAR_DISEASE	-	-	-	+	1.5158	0.0538303	0.49044	2.51797	5.42832	0	P78347	P78347	GTF2I_HUMAN	General transcription factor II-I	C (7)		3156	1631
TNPO3	C1	-0.370016	-0.77564	-1.01776	-0.275458	-0.944211	-1.09546	0.527745	0.134702	0.0204149	-0.713964	-0.376229	0.144304	-0.0672075	-0.760621	0.260322	2.75614	0.736505	1.81643	-	-	-	-	-	-	-	-	-	+	0.78255	0.24468	0.205868	1.49812	1.7616	0.0200208	Q9Y5L0	Q9Y5L0	TNPO3_HUMAN	Transportin-3	C (7)		3157	4606
MORC2	C1	0.104445	-2.19307	-0.960225	0.113733	-0.0617773	-1.58242	0.00453668	0.273538	-0.236424	0.319757	0.160233	0.231803	-0.160481	0.455967	-0.49431	2.53226	0.287802	1.20464	-	-	-	-	Fatty acyl-CoA biosynthesis	-	-	-	-	+	0.54304	0.388586	0.292985	1.12618	1.42657	0.0120938	Q9Y6X9	Q9Y6X9	MORC2_HUMAN	ATPase MORC2	C (7)		3158	4662
UPF3B	C1	-0.296802	-1.70707	-0.91632	0.218436	-0.832142	-1.22674	-0.17121	0.136509	-0.279448	0.375344	0.510798	-0.135593	0.917002	0.949433	-0.614346	2.86333	0.219999	-0.0111753	-	-	-	HALLMARK_DNA_REPAIR	Cleavage of Growing Transcript in the Termination Region;mRNA 3'-end processing;mRNA Splicing - Major Pathway;Nonsense Mediated Decay (NMD) enhanced by the Exon Junction Complex (EJC);Regulation of expression of SLITs and ROBOs;Transport of Mature mRNA derived from an Intron-Containing Transcript	-	-	-	-	+	0.635273	0.32679	0.232023	1.27365	1.7042	0.0117517	Q9BZI7	Q9BZI7	REN3B_HUMAN	Regulator of nonsense transcripts 3B	C (7)		3159	3742
PCBP1	C1	-0.585042	-1.62024	-1.72735	-1.27111	-0.690801	-0.650013	0.0431255	0.218707	0.312853	0.24177	-0.0183886	0.110174	1.01888	0.817669	0.300663	1.54422	-0.0766858	2.03156	-	-	-	HALLMARK_MYC_TARGETS_V1	mRNA Splicing - Major Pathway;Processing of Capped Intron-Containing Pre-mRNA	WP_FERROPTOSIS	-	-	-	+	1.46592	0.0597352	0.237349	2.45092	4.38086	0.00023942	Q15365	Q15365	PCBP1_HUMAN	Poly(rC)-binding protein 1	C (7)		3160	2063
SEPHS1	C1	-0.672019	-1.06757	-1.61939	-1.00591	-0.999589	-1.24925	-0.0265869	0.151724	0.497341	0.360301	0.349638	0.317829	1.01641	0.00599659	-0.166461	1.58613	0.302822	2.21858	-	-	-	-	-	-	-	-	-	+	0.71848	0.277654	0.375531	1.4019	3.8899	8.14e-05	P49903	P49903	SPS1_HUMAN	Selenide, water dikinase 1	C (7)		3161	1346
UMPS	C1	-0.910485	-0.331783	-1.52518	-1.04536	-0.961736	-0.709165	-0.151246	-0.459509	-0.0829586	-0.260903	0.0629889	0.049065	0.601778	1.09928	0.130438	1.58101	0.324041	2.58972	-	+	STIC_Epithelium PAX8 pos	HALLMARK_DNA_REPAIR;HALLMARK_IL2_STAT5_SIGNALING	Pyrimidine biosynthesis	WP_BIOMARKERS_FOR_PYRIMIDINE_METABOLISM_DISORDERS;WP_FLUOROPYRIMIDINE_ACTIVITY;WP_PYRIMIDINE_METABOLISM;WP_PYRIMIDINE_METABOLISM_AND_RELATED_DISEASES	-	-	-	+	1.95682	0.02284	0.47562	3.11081	3.85861	0.000219889	P11172	P11172	UMPS_HUMAN	Uridine 5'-monophosphate synthase	C (7)		3162	796
TRMT6	C1	-0.0954131	-0.571565	-1.84036	-0.532627	0.0588115	-0.964394	-0.54674	-0.295085	-0.510679	-0.399512	-0.539275	-0.433775	1.10259	0.160819	0.693485	1.71979	0.598992	2.39494	-	+	STIC_Epithelium PAX8 pos	-	tRNA modification in the nucleus and cytosol	-	-	-	-	+	3.04011	0.00330935	0.818811	4.64731	3.52996	0.000200762	Q9UJA5	Q9UJA5	TRM6_HUMAN	tRNA (adenine(58)-N(1))-methyltransferase non-catalytic subunit TRM6	C (7)		3163	4349
MAVS	C1	-1.05683	-0.980584	-1.36206	-0.676474	-0.639893	-0.854604	0.0969633	0.00101994	-0.671197	-0.0602514	-0.712676	-0.0559769	1.13566	0.712475	1.11284	1.57121	0.217143	2.22323	-	+	STIC_Epithelium PAX8 pos	-	DDX58/IFIH1-mediated induction of interferon-alpha/beta;Negative regulators of DDX58/IFIH1 signaling;NF-kB activation through FADD/RIP-1 pathway mediated by caspase-8 and -10;Ovarian tumor domain proteases;TRAF3-dependent IRF activation pathway;TRAF6 mediated IRF7 activation;TRAF6 mediated NF-kB activation	WP_CYTOSOLIC_DNASENSING_PATHWAY;WP_HEPATITIS_B_INFECTION;WP_HOSTPATHOGEN_INTERACTION_OF_HUMAN_CORONAVIRUSES_INTERFERON_INDUCTION;WP_MEASLES_VIRUS_INFECTION;WP_MITOCHONDRIAL_IMMUNE_RESPONSE_TO_SARSCOV2;WP_MRNA_VACCINE_ACTIVATION_OF_DENDRITIC_CELL_AND_INDUCTION_OF_IFN1;WP_NETWORK_MAP_OF_SARSCOV2_SIGNALING_PATHWAY;WP_NOVEL_INTRACELLULAR_COMPONENTS_OF_RIGILIKE_RECEPTOR_PATHWAY;WP_PATHWAYS_OF_NUCLEIC_…	-	-	-	+	2.86485	0.00457822	0.612232	4.38577	5.24423	3.1e-05	Q7Z434	Q7Z434	MAVS_HUMAN	Mitochondrial antiviral-signaling protein	C (7)		3164	2619
LSG1	C1	-0.800611	-0.885876	-1.38667	-0.85455	-0.205205	-0.108572	0.0871603	-0.574754	-0.959522	0.248502	-0.0690553	0.557966	-0.300216	0.439034	-0.445215	1.85973	0.827605	2.57025	-	-	-	-	-	-	-	-	-	+	0.957502	0.170739	0.182909	1.75224	1.78355	0.0307673	Q9H089	Q9H089	LSG1_HUMAN	Large subunit GTPase 1 homolog	C (7)		3165	3783
POLR2H	C1	-0.981302	-0.487821	-1.63641	-1.08409	0.560268	-0.548441	-0.661599	0.297846	0.00175015	-0.677423	0.347635	0.16427	0.690466	1.26253	-0.533717	1.48503	-0.516439	2.31744	-	-	-	HALLMARK_DNA_REPAIR;HALLMARK_UV_RESPONSE_UP	Abortive elongation of HIV-1 transcript in the absence of Tat;Activation of anterior HOX genes in hindbrain development during early embryogenesis;B-WICH complex positively regulates rRNA expression;Cytosolic sensors of pathogen-associated DNA;Dual incision in TC-NER;FGFR2 alternative splicing;Formation of HIV elongation complex in the absence of HIV Tat;Formation of HIV-1 elongation complex cont…	WP_2Q13_COPY_NUMBER_VARIATION_SYNDROME;WP_CYTOSOLIC_DNASENSING_PATHWAY;WP_EUKARYOTIC_TRANSCRIPTION_INITIATION;WP_PYRIMIDINE_METABOLISM	-	-	-	+	0.944238	0.175541	0.171614	1.73334	1.61486	0.0395447	P52434	P52434	RPAB3_HUMAN	DNA-directed RNA polymerases I, II, and III subunit RPABC3	C (7)		3166	1404
GTF2F1	C1	-0.264661	-1.20316	-1.24607	-0.498809	-0.236011	-1.22853	-0.295261	0.294966	0.915727	0.172619	-0.23561	0.0272246	-0.0507764	0.99183	-0.122394	2.24838	-1.16669	1.89722	-	-	-	HALLMARK_APICAL_JUNCTION;HALLMARK_DNA_REPAIR	Abortive elongation of HIV-1 transcript in the absence of Tat;FGFR2 alternative splicing;Formation of HIV elongation complex in the absence of HIV Tat;Formation of HIV-1 elongation complex containing HIV-1 Tat;Formation of RNA Pol II elongation complex;Formation of the Early Elongation Complex;Formation of the HIV-1 Early Elongation Complex;HIV elongation arrest and recovery;HIV Transcription Ini…	-	-	-	-	+	0.387533	0.520308	0.139997	0.860441	1.47125	0.0265421	P35269	P35269	T2FA_HUMAN	General transcription factor IIF subunit 1	C (7)		3167	1161
EEF1A2	C1	-0.287113	-0.659625	-0.915961	-1.36095	-0.478338	-0.938848	-0.181596	-0.298271	-0.231775	-0.0843036	-0.529678	-0.232661	1.15899	0.0647367	0.532382	3.06251	1.00714	0.373365	-	+	STIC_Epithelium PAX8 pos	-	Eukaryotic Translation Elongation	WP_TRANSLATION_FACTORS	-	-	-	+	1.81715	0.0298971	0.375709	2.92249	3.08136	0.00164207	Q05639	Q05639	EF1A2_HUMAN	Elongation factor 1-alpha 2	C (7)		3168	1750
EEF1A1;EEF1A1P5	C1	-0.346475	-1.05925	-1.21334	-1.56559	0.276367	-0.287718	-0.391646	0.48474	-0.0430636	-0.296417	-0.814199	-0.396788	0.900829	0.923899	0.2831	2.81481	0.835331	-0.104593	Secretory_1	+	STIC_Epithelium PAX8 pos	-	Eukaryotic Translation Elongation;HSF1 activation;Neutrophil degranulation;Peptide chain elongation;Protein methylation	WP_2Q37_COPY_NUMBER_VARIATION_SYNDROME;WP_FRAGILE_X_SYNDROME;WP_TRANSLATION_FACTORS	-	-	-	+	1.61504	0.0447163	0.319617	2.65118	2.30216	0.006679	Cont_P68103;P68104;Q5VTE0	P68104;Q5VTE0;Cont_P68103	EF1A1_BOVIN;EF1A1_HUMAN;EF1A3_HUMAN	Elongation factor 1-alpha 1	C (7)	+	3169	77
NUDCD1	C1	-0.621408	-0.242791	-0.393237	-2.15611	-0.702611	-0.387969	-0.689963	0.00315442	-0.264013	-0.00173558	-0.780869	-0.420851	0.850574	1.9278	0.134446	1.89754	0.859218	0.988828	-	+	STIC_Epithelium PAX8 pos	-	-	-	-	-	-	+	3.06704	0.00316462	0.787162	4.68807	3.70165	0.000134078	Q96RS6	Q96RS6	NUDC1_HUMAN	NudC domain-containing protein 1	C (7)		3170	3488
KNOP1	C1	-0.457657	-0.919271	-1.60143	-0.92341	-1.41135	0.0806702	-1.77188	0.110473	0.616069	0.649018	-0.00596749	0.282529	0.582857	0.854564	0.185624	1.4293	1.7438	0.556066	-	-	-	-	-	-	-	-	-	+	1.19437	0.105246	0.943415	2.08259	2.59659	0.000424431	Q1ED39	Q1ED39	KNOP1_HUMAN	Lysine-rich nucleolar protein 1	C (7)		3171	2166
DHCR24	C1	-0.656613	-1.14648	-0.475904	-1.17852	-1.03246	-0.647616	-1.58119	0.334408	0.105196	-0.117416	-0.773713	0.215245	1.35574	0.383637	1.34851	1.51294	1.11412	1.24013	Secretory_2	+	STIC_Epithelium PAX8 pos	HALLMARK_ANDROGEN_RESPONSE;HALLMARK_BILE_ACID_METABOLISM;HALLMARK_FATTY_ACID_METABOLISM;HALLMARK_MTORC1_SIGNALING;HALLMARK_PEROXISOME	Cholesterol biosynthesis via desmosterol;Cholesterol biosynthesis via lathosterol	WP_CHOLESTEROL_BIOSYNTHESIS_WITH_SKELETAL_DYSPLASIAS;WP_CHOLESTEROL_METABOLISM;WP_CHOLESTEROL_METABOLISM_WITH_BLOCH_AND_KANDUTSCHRUSSELL_PATHWAYS;WP_CHOLESTEROL_SYNTHESIS_DISORDERS	-	-	-	+	2.77617	0.00525795	2.31928	4.25573	4.72258	0	Q15392	Q15392	DHC24_HUMAN	Delta(24)-sterol reductase	C (7)		3172	2068
TTF2	C1	-0.0684378	-1.62611	0.331502	-1.16437	0.212325	-0.900918	-1.10263	-1.42841	0.600728	0.112857	0.499147	-0.383592	1.48177	-0.278409	0.374465	2.21997	0.689823	0.430295	-	-	-	-	-	WP_THYROID_HORMONES_PRODUCTION_AND_PERIPHERAL_DOWNSTREAM_SIGNALING_EFFECTS;WP_THYROID_STIMULATING_HORMONE_TSH_SIGNALING_PATHWAY	-	-	-	+	1.28357	0.0870135	0.58326	2.2044	1.48902	0.0113195	Q9UNY4	Q9UNY4	TTF2_HUMAN	Transcription termination factor 2	C (7)		3173	4440
OSGEPL1	C1	-1.12172	-0.895637	-0.47721	-1.02963	0.211761	-1.31748	-1.45859	-1.44433	0.495872	0.571741	-0.28816	0.535548	1.2159	0.763828	0.818687	1.29924	0.9064	1.21378	-	+	STIC_Epithelium PAX8 pos	-	-	-	-	-	-	+	2.01113	0.0204297	1.04232	3.18436	3.09985	0.000216822	Q9H4B0	Q9H4B0	OSGL1_HUMAN	tRNA N6-adenosine threonylcarbamoyltransferase, mitochondrial	C (7)		3174	3865
INCENP	C1	-0.128071	0.219447	0.169066	-0.576309	-0.569434	-0.885442	-1.53775	-1.01392	0.0307973	-1.19933	-0.243382	-0.38408	-0.649087	0.941866	1.41283	2.0423	1.45217	0.918333	-	+	STIC_Epithelium PAX8 pos	HALLMARK_G2M_CHECKPOINT;HALLMARK_MITOTIC_SPINDLE	Amplification of signal from unattached kinetochores via a MAD2 inhibitory signal;Mitotic Prometaphase;Resolution of Sister Chromatid Cohesion;RHO GTPases Activate Formins;Separation of Sister Chromatids;SUMOylation of DNA replication proteins	-	-	-	-	+	2.5114	0.00861413	1.54344	3.87572	2.8495	0.000275941	Q9NQS7	Q9NQS7	INCE_HUMAN	Inner centromere protein	C (7)		3175	4027
KIF22	C1	-0.683354	-0.389111	0.348931	0.144503	-0.716929	-0.793303	-1.61046	0.265322	0.0860947	-0.660712	-0.300793	-0.448857	-1.67591	1.03759	1.27693	1.95805	1.01431	1.14769	Unclassified_3	-	-	HALLMARK_E2F_TARGETS;HALLMARK_G2M_CHECKPOINT;HALLMARK_MITOTIC_SPINDLE	COPI-dependent Golgi-to-ER retrograde traffic;Kinesins;MHC class II antigen presentation	WP_16P112_PROXIMAL_DELETION_SYNDROME	-	-	-	+	1.22905	0.0976182	1.23552	2.13008	1.32719	0.00994693	Q14807	Q14807	KIF22_HUMAN	Kinesin-like protein KIF22	C (7)		3176	2001
BEND3	C1	-0.578036	-0.575656	1.03085	-0.819676	-1.34504	-1.38733	-0.622954	0.46227	0.921777	-1.48998	0.416698	0.578789	-1.15198	0.31437	1.04655	1.73048	0.948362	0.520502	-	-	-	-	-	-	-	-	-	+	0.444279	0.46723	0.56479	0.960361	0.923968	0.0311454	Q5T5X7	Q5T5X7	BEND3_HUMAN	BEN domain-containing protein 3	C (7)		3177	2328
INTS15	C1	-0.341687	-0.0433427	-0.0314864	-0.399034	-0.574312	-0.322542	-1.61565	-0.831625	-0.797606	0.180171	1.23907	-1.17499	-1.3551	0.987176	1.40428	1.49826	1.07361	1.10481	-	-	-	-	-	-	-	-	-	+	1.21803	0.100063	1.44049	2.115	1.32782	0.00932026	Q96N11	Q96N11	INT15_HUMAN	Integrator complex subunit 15	C (7)		3178	3441
PRC1	C1	-1.41173	-0.378517	1.20676	0.218557	-0.170552	-1.21058	-0.779719	-0.809226	0.099619	-0.421507	0.905005	-1.13906	-1.29838	0.484471	1.73836	1.43875	0.520128	1.00762	Unclassified_3	-	-	HALLMARK_G2M_CHECKPOINT;HALLMARK_MITOTIC_SPINDLE	RHO GTPases activate CIT	-	-	-	-	+	1.0492	0.141426	0.896248	1.8816	0.8236	0.0472403	O43663	O43663	PRC1_HUMAN	Protein regulator of cytokinesis 1	C (7)		3179	296
USP39	C1	-0.299119	-0.582616	-1.63846	-0.766279	-0.407397	-1.35981	0.403958	0.0695429	0.208162	-0.359394	0.132528	0.474207	-0.705167	0.39552	0.673025	3.05676	0.315547	0.388997	-	-	-	-	mRNA Splicing - Major Pathway	-	-	-	-	+	0.47461	0.441578	0.0995069	1.01229	1.80615	0.0320595	Q53GS9	Q53GS9	SNUT2_HUMAN	U4/U6.U5 tri-snRNP-associated protein 2	C (7)		3180	2239
RNF40	C1	-0.42844	-0.937394	-1.40917	-1.13328	-0.397976	-1.31994	-0.22318	0.000558115	0.2897	0.138728	-0.043249	0.0272441	-0.272183	0.88465	1.09633	2.74244	-0.0301561	1.01533	-	-	-	-	E3 ubiquitin ligases ubiquitinate target proteins	WP_ATM_SIGNALING_IN_DEVELOPMENT_AND_DISEASE	-	-	-	+	1.12187	0.122103	0.22006	1.98271	2.98813	0.00274371	O75150	O75150	BRE1B_HUMAN	E3 ubiquitin-protein ligase BRE1B	C (7)		3181	388
RNF20	C1	-0.600589	-0.384996	-2.09075	-0.413685	0.197986	-0.900033	-0.303129	-0.0493148	0.188333	-0.153398	0.0723655	0.078321	0.0815552	0.511496	1.03902	2.96365	-0.741166	0.504335	-	-	-	-	E3 ubiquitin ligases ubiquitinate target proteins	WP_ATM_SIGNALING_IN_DEVELOPMENT_AND_DISEASE	-	-	-	+	0.761865	0.254909	0.159919	1.46727	1.44773	0.0460512	Q5VTR2	Q5VTR2	BRE1A_HUMAN	E3 ubiquitin-protein ligase BRE1A	C (7)		3182	2366
COIL	C1	-0.357336	-0.379088	-1.54832	0.177422	-0.362857	-1.51373	-0.685583	0.351344	-0.152752	-1.41016	0.137712	0.31343	-0.301525	1.61694	1.35196	2.08042	0.167515	0.514606	-	-	-	HALLMARK_SPERMATOGENESIS	-	-	-	-	-	+	1.45826	0.0606837	0.396071	2.44061	2.03833	0.00651901	P38432	P38432	COIL_HUMAN	Coilin	C (7)		3183	1193
GTF3C1	C1	-0.1765	-0.772965	-1.25372	-0.782642	-0.500569	-0.623814	-0.894514	-0.258947	0.53723	-0.243666	-0.206965	0.0698258	-0.949512	1.31613	1.65197	2.60264	0.365097	0.120931	-	-	-	-	RNA Polymerase III Abortive And Retractive Initiation;RNA Polymerase III Transcription Initiation From Type 1 Promoter;RNA Polymerase III Transcription Initiation From Type 2 Promoter	-	-	-	-	+	1.02947	0.146951	0.201341	1.85395	1.83721	0.0270954	Q12789	Q12789	TF3C1_HUMAN	General transcription factor 3C polypeptide 1	C (7)		3184	1815
EIF4B	C1	-0.396682	-0.672794	-0.952847	-0.525135	-0.436031	-0.531151	-0.231037	-0.352435	-0.651732	-0.300728	0.0228711	0.0892112	-0.339488	1.30974	1.19254	3.25152	-0.0207272	-0.455105	-	-	-	-	Activation of the mRNA upon binding of the cap-binding complex and eIFs, and subsequent binding to 43S;Deadenylation of mRNA;GTP hydrolysis and joining of the 60S ribosomal subunit;L13a-mediated translational silencing of Ceruloplasmin expression;mTORC1-mediated signalling;Ribosomal scanning and start codon recognition;Translation initiation complex formation	WP_FOCAL_ADHESION_PI3KAKTMTORSIGNALING_PATHWAY;WP_INTERFERON_TYPE_I_SIGNALING_PATHWAYS;WP_MALIGNANT_PLEURAL_MESOTHELIOMA;WP_PERTURBATIONS_TO_HOSTCELL_AUTOPHAGY_INDUCED_BY_SARSCOV2_PROTEINS;WP_PI3KAKT_SIGNALING_PATHWAY;WP_TRANSLATION_FACTORS;WP_TRANSLATION_INHIBITORS_IN_CHRONICALLY_ACTIVATED_PDGFRA_CELLS	-	-	-	+	0.996099	0.156794	0.27463	1.80695	1.55751	0.0265953	P23588	P23588	IF4B_HUMAN	Eukaryotic translation initiation factor 4B	C (7)		3185	1000
PEX14	C1	-0.661199	-0.0943392	-0.972947	-0.00352778	-0.497047	-0.35203	-1.34132	-0.861536	0.0128742	-0.567715	0.118343	0.0886252	-0.0552779	0.469806	1.1114	3.20018	0.735838	-0.330128	-	-	-	HALLMARK_ADIPOGENESIS;HALLMARK_PEROXISOME;HALLMARK_UV_RESPONSE_DN	-	-	-	-	-	+	1.31312	0.0820064	0.658051	2.24455	1.5956	0.00920225	O75381	O75381	PEX14_HUMAN	Peroxisomal membrane protein PEX14	C (7)		3186	410
DNAJC9	C1	-1.19519	-0.545698	-1.76427	-0.418169	-1.01352	-0.949472	-0.330267	0.00940771	0.124984	-0.0076252	0.06478	0.349468	0.455691	0.355346	1.3603	2.67836	0.181276	0.644606	Unclassified_3	-	-	-	-	-	-	-	-	+	1.35824	0.0745977	0.367478	2.30568	3.4752	0.000358754	Q8WXX5	Q8WXX5	DNJC9_HUMAN	DnaJ homolog subfamily C member 9	C (7)		3187	3122
SMCHD1	C1	-1.06661	-0.797521	-0.88999	-0.433705	-1.33525	-0.883611	-0.467455	0.084889	0.317082	-0.116159	0.224433	0.156096	-0.553146	0.233894	1.73769	2.66122	0.854981	0.273153	-	-	-	-	-	-	-	-	-	+	0.927445	0.181496	0.247241	1.70934	2.62176	0.00320632	A6NHR9	A6NHR9	SMHD1_HUMAN	Structural maintenance of chromosomes flexible hinge domain-containing protein 1	C (7)		3188	35
ATXN2L	C1	-0.513332	-1.00652	-1.38443	-0.633163	-1.00014	-0.880724	-0.209585	-0.0264081	0.0590964	-0.0494482	-0.0165899	-0.00897274	-0.525636	1.79274	1.71051	2.23096	0.429831	0.0318119	-	-	-	-	-	WP_16P112_DISTAL_DELETION_SYNDROME	-	-	-	+	1.2514	0.0932867	0.30449	2.16059	3.01445	0.00157494	Q8WWM7	Q8WWM7	ATX2L_HUMAN	Ataxin-2-like protein	C (7)		3189	3107
SAMD1	C1	-0.968807	-0.970892	-1.41047	-0.913778	-1.10886	-1.14397	-0.240881	-0.298163	0.606895	0.0521816	0.365219	0.0542834	0.118646	1.92068	1.3405	1.7813	0.626864	0.189263	-	-	-	-	-	-	-	-	-	+	1.54883	0.050764	0.623017	2.56233	4.77969	2.05e-05	Q6SPF0	Q6SPF0	SAMD1_HUMAN	Sterile alpha motif domain-containing protein 1	C (7)		3190	2508
VPS37B	C1	-0.166137	-0.692571	-1.18145	-0.333681	-1.15851	-1.21735	0.616942	0.0806008	-0.418934	-0.489214	0.314972	-0.148532	0.183736	0.995545	2.0693	2.24168	0.227885	-0.924289	Unclassified_2	-	-	HALLMARK_DNA_REPAIR	Budding and maturation of HIV virion;Endosomal Sorting Complex Required For Transport (ESCRT);Membrane binding and targetting of GAG proteins	WP_7Q1123_COPY_NUMBER_VARIATION_SYNDROME	-	-	-	+	0.804154	0.235183	0.329247	1.53014	1.9266	0.00619195	Q9H9H4	Q9H9H4	VP37B_HUMAN	Vacuolar protein sorting-associated protein 37B	C (7)		3191	3929
NELFA	C1	-0.631869	-0.725528	-1.82944	-0.149535	-0.279281	-0.671898	-0.330488	0.558702	0.245899	-0.28178	-0.0721282	0.0619039	-0.202111	0.59463	2.43558	2.04118	0.258704	-1.02254	-	-	-	-	Abortive elongation of HIV-1 transcript in the absence of Tat;Formation of HIV elongation complex in the absence of HIV Tat;Formation of HIV-1 elongation complex containing HIV-1 Tat;Formation of RNA Pol II elongation complex;Formation of the Early Elongation Complex;Formation of the HIV-1 Early Elongation Complex;HIV elongation arrest and recovery;Pausing and recovery of HIV elongation;Pausing a…	WP_INITIATION_OF_TRANSCRIPTION_AND_TRANSLATION_ELONGATION_AT_THE_HIV1_LTR	-	-	-	+	0.570401	0.369116	0.276769	1.17058	1.38214	0.0189975	Q9H3P2	Q9H3P2	NELFA_HUMAN	Negative elongation factor A	C (7)		3192	3850
SMARCD1	C1	-1.5005	-0.783635	-1.1074	-0.750727	-0.711436	-0.865807	0.0853728	0.31487	-0.112457	-0.0995777	0.0162529	0.346	0.149474	0.492896	1.74402	2.32301	1.2375	-0.777858	-	-	-	-	RMTs methylate histone arginines;RUNX1 interacts with co-factors whose precise effect on RUNX1 targets is not known	WP_THERMOGENESIS;WP_TUMOR_SUPPRESSOR_ACTIVITY_OF_SMARCB1	-	-	-	+	0.881366	0.199538	0.229642	1.643	2.86963	0.00213829	Q96GM5	Q96GM5	SMRD1_HUMAN	SWI/SNF-related matrix-associated actin-dependent regulator of chromatin subfamily D member 1	C (7)		3193	3347
LDB1	C1	-0.83645	-0.530537	-1.02643	-0.358563	-0.431557	-0.295273	-1.1756	0.0174797	0.0546469	-0.327625	0.291479	-0.429843	-0.363129	1.73204	0.0134845	2.58551	1.63574	-0.555378	-	-	-	HALLMARK_HEDGEHOG_SIGNALING	Regulation of expression of SLITs and ROBOs;RUNX1 regulates transcription of genes involved in differentiation of HSCs	-	-	-	-	+	1.07634	0.134228	0.355429	1.91948	1.62421	0.0162775	Q86U70	Q86U70	LDB1_HUMAN	LIM domain-binding protein 1	C (7)		3194	2660
MFN2	C1	-1.25763	-0.0733118	-1.29902	0.0866831	-0.824251	-0.51181	0.123368	0.493242	-1.25068	0.0858117	-0.024024	-0.0540358	-0.442374	0.542216	0.717481	2.53226	1.77346	-0.617379	-	-	-	HALLMARK_OXIDATIVE_PHOSPHORYLATION	Factors involved in megakaryocyte development and platelet production;Pink/Parkin Mediated Mitophagy	WP_INTRACELLULAR_TRAFFICKING_PROTEINS_INVOLVED_IN_CMT_NEUROPATHY	-	-	-	+	0.806721	0.233919	0.21624	1.53393	1.40524	0.0373043	O95140	O95140	MFN2_HUMAN	Mitofusin-2	C (7)		3195	515
TMEM230	C1	-0.596528	-3.2254	-0.848608	-0.0710912	-0.175728	-0.503786	0.0572661	0.455965	0.0365789	-0.029928	-0.0892918	-0.0193222	0.253944	0.680418	1.33887	1.23565	0.884559	0.616429	-	+	STIC_Epithelium PAX8 pos	-	-	-	-	-	-	+	2.70825	0.00611921	0.4224	4.15711	2.50007	0.00116355	Q96A57	Q96A57	TM230_HUMAN	Transmembrane protein 230	C (7)		3196	3234
TMBIM1	C1	-0.734086	-3.1306	-0.794776	-0.471943	0.0335964	0.18098	0.984516	0.45769	-0.614565	-0.118651	0.0344414	0.125784	-0.222417	0.419128	0.896652	1.14163	1.22989	0.582737	-	-	-	-	Neutrophil degranulation	-	-	-	-	+	0.920373	0.184004	0.350323	1.6992	1.69133	0.00558486	Q969X1	Q969X1	LFG3_HUMAN	Protein lifeguard 3	C (7)		3197	3223
GBA1	C1	-0.367462	-3.31073	-0.461535	-0.237337	-0.439746	0.503053	1.22609	0.856337	-0.61105	-0.0462275	0.109213	0.0737901	0.793389	0.0102868	0.802843	1.13315	-0.0135602	-0.0205057	-	-	-	-	Association of TriC/CCT with target proteins during biosynthesis;Glycosphingolipid metabolism	-	-	-	-	+	0.217607	0.705832	0.0998324	0.53268	1.06801	0.0319294	P04062	P04062	GBA1_HUMAN	Lysosomal acid glucosylceramidase	C (7)		3198	646
MSTO1	C1	-1.69492	-2.77166	-0.744053	0.333157	-0.00853252	-0.247359	0.300229	0.38661	0.0992566	-0.11745	-0.227223	-0.24243	0.587268	0.794674	1.21144	0.292041	0.425628	1.62333	-	+	STIC_Epithelium PAX8 pos	-	-	-	-	-	-	+	2.14053	0.015924	0.571451	3.36056	2.24111	0.00143272	Q9BUK6	Q9BUK6	MSTO1_HUMAN	Protein misato homolog 1	C (7)		3199	3658
FUT11	C1	-1.62459	-2.01455	-0.777119	-0.421153	0.414331	0.0556065	0.342775	0.337483	-1.53911	0.135688	0.354272	-0.193335	0.233796	0.316494	1.07038	0.688344	0.486825	2.13386	-	-	-	-	-	-	-	-	-	+	1.27257	0.0891798	0.585129	2.18944	1.82159	0.00431572	Q495W5	Q495W5	FUT11_HUMAN	Alpha-(1,3)-fucosyltransferase 11	C (7)		3200	2210
ZMIZ1	C1	-0.352003	-2.92879	-0.61406	-0.384574	0.453287	-0.206739	-0.39632	-0.152748	0.256514	0.0990492	-0.0527307	-0.155542	0.242719	0.00336991	0.469736	0.693814	0.536334	2.48868	-	-	-	HALLMARK_ANDROGEN_RESPONSE;HALLMARK_UV_RESPONSE_DN	-	WP_ANDROGEN_RECEPTOR_SIGNALING_PATHWAY	-	-	-	+	1.24295	0.0949418	0.47547	2.14907	1.42245	0.0118599	Q9ULJ6	Q9ULJ6	ZMIZ1_HUMAN	Zinc finger MIZ domain-containing protein 1	C (7)		3201	4399
LEO1	C1	-0.0267668	-3.14396	0.156397	-0.139787	0.707707	-0.846216	-0.469875	-0.589843	-0.0177649	0.0628569	0.372283	-0.492412	0.263058	-0.0833056	1.22522	1.24626	0.578217	1.19793	-	+	STIC_Epithelium PAX8 pos	-	E3 ubiquitin ligases ubiquitinate target proteins;Formation of RNA Pol II elongation complex;Formation of the beta-catenin:TCF transactivating complex;RNA Polymerase II Pre-transcription Events;RNA Polymerase II Transcription Elongation	WP_ENDODERM_DIFFERENTIATION	-	-	-	+	2.09368	0.0174079	0.290998	3.29659	1.21376	0.0408209	Q8WVC0	Q8WVC0	LEO1_HUMAN	RNA polymerase-associated protein LEO1	C (7)		3202	3085
COLGALT1	C1	0.575843	-2.87426	-0.871458	-0.44567	-0.859808	-0.781928	-0.0723399	0.0108312	-0.184682	-0.255013	0.321988	-0.202527	0.678084	1.32221	0.992095	0.425676	1.04218	1.17877	-	+	STIC_Epithelium PAX8 pos	-	Collagen biosynthesis and modifying enzymes	WP_TYPE_I_COLLAGEN_SYNTHESIS_IN_THE_CONTEXT_OF_OSTEOGENESIS_IMPERFECTA	-	-	-	+	4.01986	0.000769231	0.848838	6.24615	2.85797	0.000288451	Q8NBJ5	Q8NBJ5	GT251_HUMAN	Procollagen galactosyltransferase 1	C (7)		3203	2915
TFAP2D	C1	-0.226836	-2.96316	-0.732379	-0.228274	-1.07574	-0.330857	-0.00598892	0.207291	-0.292055	-0.356985	0.280666	0.105549	0.502146	0.789655	0.796163	0.821207	1.11764	1.59196	-	+	STIC_Epithelium PAX8 pos	-	Activation of the TFAP2 (AP-2) family of transcription factors;Negative regulation of activity of TFAP2 (AP-2) family transcription factors	WP_CILIARY_LANDSCAPE	-	-	-	+	3.30728	0.0023322	0.645247	5.05879	3.08651	0.000256019	Q7Z6R9	Q7Z6R9	AP2D_HUMAN	Transcription factor AP-2-delta	C (7)		3204	2638
OTUD6B	C1	0.115485	-3.32458	-0.266801	0.0511452	-0.170269	-0.115932	-0.47352	-0.463426	0.0729654	-0.171836	-0.0410326	-0.375858	0.238112	1.28989	0.733869	1.05583	1.17115	0.674802	-	+	STIC_Epithelium PAX8 pos	-	-	-	-	-	-	+	3.86432	0.000860759	0.695564	5.97457	1.75808	0.00502752	Q8N6M0	Q8N6M0	OTU6B_HUMAN	Deubiquitinase OTUD6B	C (7)		3205	2879
NEPRO	C1	-1.247	-1.51821	0.156953	-2.13521	-0.585138	-0.283839	0.463107	1.41919	0.870089	0.0954594	-0.412172	-0.6961	0.328487	0.764139	-0.392163	1.42396	0.671276	1.07717	-	-	-	-	-	-	-	-	-	+	0.387221	0.520524	0.287041	0.859881	2.16484	0.00151697	Q6NW34	Q6NW34	NEPRO_HUMAN	Nucleolus and neural progenitor protein	C (7)		3206	2454
INPP5B	C1	-2.37378	-1.9699	0.677545	-1.10903	-0.154853	0.640785	0.102767	0.623812	-0.873352	0.24493	0.530765	0.22582	0.696886	0.978979	-0.555592	0.602919	0.51994	1.19136	-	-	-	-	Rho GTPase cycle;Synthesis of IP2, IP, and Ins in the cytosol;Synthesis of IP3 and IP4 in the cytosol	-	-	-	-	+	0.653206	0.315642	0.207427	1.30164	1.17657	0.0269414	P32019	P32019	I5P2_HUMAN	Type II inositol 1,4,5-trisphosphate 5-phosphatase	C (7)		3207	1123
AUP1	C1	-0.161546	-2.3014	0.0948314	-0.912123	-0.88815	-1.12933	0.940055	0.974408	0.466565	-0.0262047	-0.00316652	-0.0674564	0.418265	0.54404	-0.435739	2.38215	0.485548	-0.380748	-	-	-	-	-	-	-	-	-	+	0.0982179	0.861055	0.0364501	0.263394	1.74823	0.0144166	Q9Y679	Q9Y679	AUP1_HUMAN	Lipid droplet-regulating VLDL assembly factor AUP1	C (7)		3208	4631
PHC2	C1	0.725643	-2.70908	-0.0407178	-2.29223	0.103886	0.197345	0.353372	0.410425	-0.0273505	0.430634	0.32868	0.109527	0.757995	0.649482	-0.408566	1.3451	0.38953	-0.323672	-	-	-	-	Oxidative Stress Induced Senescence;Regulation of PTEN gene transcription;RUNX1 interacts with co-factors whose precise effect on RUNX1 targets is not known;SUMOylation of chromatin organization proteins;SUMOylation of DNA damage response and repair proteins;SUMOylation of RNA binding proteins	-	-	-	-	+	0.188616	0.740884	0.0965784	0.471047	0.894983	0.0427672	Q8IXK0	Q8IXK0	PHC2_HUMAN	Polyhomeotic-like protein 2	C (7)		3209	2764
NOL4L	C1	0.734347	-1.7001	-0.789032	-1.83493	0.39252	-1.47832	-0.068246	0.596077	0.520714	-1.52661	0.554643	0.357577	0.598194	1.25523	0.386135	1.05972	0.783207	0.158868	-	-	-	-	-	-	-	-	-	+	0.916398	0.185138	0.734861	1.6935	1.62357	0.00417574	Q96MY1	Q96MY1;O94818	NOL4L_HUMAN	Nucleolar protein 4-like	C (7)		3210	3439
GTF2E2	C1	0.59415	-2.47378	0.360281	-1.19764	-0.189903	-1.61898	-0.156535	-0.447058	0.732644	-0.746192	0.294462	-0.097915	0.641296	1.07605	0.383692	1.47286	0.865481	0.507088	-	+	STIC_Epithelium PAX8 pos	-	HIV Transcription Initiation;RNA Polymerase II HIV Promoter Escape;RNA Polymerase II Pre-transcription Events;RNA Polymerase II Promoter Escape;RNA polymerase II transcribes snRNA genes;RNA Polymerase II Transcription Initiation;RNA Polymerase II Transcription Initiation And Promoter Clearance;RNA Polymerase II Transcription Pre-Initiation And Promoter Opening;Transcription of the HIV genome	WP_EUKARYOTIC_TRANSCRIPTION_INITIATION	-	-	-	+	2.09924	0.0172449	0.540266	3.30417	1.90276	0.00381861	P29084	P29084	T2EB_HUMAN	Transcription initiation factor IIE subunit beta	C (7)		3211	1069
ABCF3	C1	-0.759981	-1.26167	-1.10379	-0.592478	0.135423	0.454331	-0.575705	0.477943	-0.544527	-0.952687	-0.203367	-0.341997	1.0406	2.01966	-1.188	1.32701	1.59992	0.46932	-	-	-	-	-	-	-	-	-	+	1.46212	0.0602095	0.294305	2.4458	1.73509	0.0222684	Q9NUQ8	Q9NUQ8	ABCF3_HUMAN	ATP-binding cassette sub-family F member 3	C (7)		3212	4101
TRIM27	C1	0.0601581	-0.943429	-0.980765	-1.3566	0.261935	0.127267	-0.853778	0.525416	-0.0505979	-1.19456	-0.12275	-0.0596975	0.830829	0.433035	-0.471123	1.6078	2.62479	-0.437929	-	-	-	-	Regulation of PTEN stability and activity	-	-	-	-	+	1.06906	0.136272	0.326865	1.90934	1.23301	0.0399199	P14373	P14373	TRI27_HUMAN	Zinc finger protein RFP	C (7)		3213	845
CCDC71L	C1	-1.06012	0.583045	0.177389	-0.605347	-0.0975521	-1.0475	-0.319559	0.475256	-0.288511	-1.17731	0.109162	-2.41455	1.06306	0.222243	1.04513	1.55559	0.647695	1.13188	-	+	STIC_Epithelium PAX8 pos	-	-	-	-	-	-	+	2.11259	0.0168059	1.24764	3.32238	2.15548	0.00155671	Q8N9Z2	Q8N9Z2	CC71L_HUMAN	Coiled-coil domain-containing protein 71L	C (7)		3214	2902
SLC27A4	C1	-0.533645	0.0615593	0.203912	-0.472713	-0.522784	-0.608733	0.554473	-0.141262	-0.0815924	-0.615054	-0.319486	-2.75202	1.9495	0.479136	1.58663	0.729328	0.571921	-0.089169	-	-	-	-	Defective SLC27A4 causes ichthyosis prematurity syndrome (IPS);Transport of fatty acids	WP_CHOLESTEROL_METABOLISM;WP_FATTY_ACID_TRANSPORTERS;WP_PPAR_SIGNALING_PATHWAY	-	-	-	+	1.54642	0.0508742	0.949545	2.5591	1.73308	0.00504013	Q6P1M0	Q6P1M0	S27A4_HUMAN	Long-chain fatty acid transport protein 4	C (7)		3215	2467
RAD18	C1	-0.554139	-1.07766	-0.325461	0.293402	-0.182016	-0.694457	0.159073	0.497979	0.0356841	-0.719637	-1.2592	-2.10434	1.15542	-0.324052	1.19262	1.14013	1.26405	1.50261	-	+	STIC_Epithelium PAX8 pos	-	E3 ubiquitin ligases ubiquitinate target proteins;Recognition of DNA damage by PCNA-containing replication complex	WP_NUCLEOTIDE_EXCISION_REPAIR_IN_XERODERMA_PIGMENTOSUM;WP_SMC1SMC3_ROLE_IN_DNA_DAMAGE_CORNELIA_DE_LANGE_SYNDROME	-	-	-	+	2.0268	0.0198026	0.994915	3.20562	2.39618	0.00115452	Q9NS91	Q9NS91	RAD18_HUMAN	E3 ubiquitin-protein ligase RAD18	C (7)		3216	4071
CBL	C1	-1.13014	-1.64807	-0.612789	-0.150628	1.28236	-0.302706	0.526156	0.243096	-1.00038	0.325817	-0.119745	-2.0738	0.991355	1.06771	0.753838	1.54037	0.195536	0.112019	-	-	-	HALLMARK_IL6_JAK_STAT3_SIGNALING;HALLMARK_KRAS_SIGNALING_UP	Antigen activates B Cell Receptor (BCR) leading to generation of second messengers;Cargo recognition for clathrin-mediated endocytosis;Clathrin-mediated endocytosis;Constitutive Signaling by EGFRvIII;Constitutive Signaling by Ligand-Responsive EGFR Cancer Variants;EGFR downregulation;InlB-mediated entry of Listeria monocytogenes into host cell;Interleukin-6 signaling;Negative regulation of FGFR1 …	WP_ANGIOPOIETINLIKE_PROTEIN_8_REGULATORY_PATHWAY;WP_B_CELL_RECEPTOR_SIGNALING_PATHWAY;WP_EGFEGFR_SIGNALING_PATHWAY;WP_ERBB_SIGNALING_PATHWAY;WP_GLIOBLASTOMA_SIGNALING_PATHWAYS;WP_IL2_SIGNALING_PATHWAY;WP_IL3_SIGNALING_PATHWAY;WP_IL4_SIGNALING_PATHWAY;WP_INSULIN_SIGNALING;WP_INTERFERON_TYPE_I_SIGNALING_PATHWAYS;WP_KIT_RECEPTOR_SIGNALING_PATHWAY;WP_MET_IN_TYPE_1_PAPILLARY_RENAL_CELL_CARCINOMA;WP_PH…	-	-	-	+	1.44078	0.0628216	0.653209	2.41707	1.25863	0.0183274	P22681	P22681	CBL_HUMAN	E3 ubiquitin-protein ligase CBL	C (7)		3217	982
UBE4B	C1	-1.37881	-0.605231	-0.644748	-0.047371	0.601739	0.147768	0.389573	0.653225	-1.72498	0.548151	-0.18265	-2.35429	0.859514	0.31454	0.830159	1.50881	0.77538	0.309217	-	-	-	-	-	-	-	-	-	+	1.26958	0.0896462	1.0741	2.18537	1.22553	0.0142167	O95155	O95155	UBE4B_HUMAN	Ubiquitin conjugation factor E4 B	C (7)		3218	517
KDM5B	C1	-1.81792	-0.404022	-1.4084	0.114037	-0.205597	-1.31767	0.417116	-1.5196	0.271399	1.02216	-0.191676	-0.236829	1.43757	0.203629	0.400694	1.37259	0.635223	1.22729	-	-	-	-	HDMs demethylate histones;TFAP2 (AP-2) family regulates transcription of cell cycle factors	WP_RETT_SYNDROME_CAUSING_GENES	-	-	-	+	1.3007	0.0840109	0.545089	2.2277	2.40805	0.00129836	Q9UGL1	Q9UGL1	KDM5B_HUMAN	Lysine-specific demethylase 5B	C (7)		3219	4301
MAP4K4	C1	-1.31159	-0.0431497	-0.702198	-0.0317171	0.483501	-0.639064	-0.908946	-1.71331	-0.177652	0.560057	-0.541804	-0.766536	1.82212	-0.0592393	0.476223	2.12142	0.912955	0.518932	-	+	STIC_Epithelium PAX8 pos	-	-	-	-	-	-	+	2.13798	0.0160189	1.43809	3.35707	2.26913	0.000990968	O95819	O95819	M4K4_HUMAN	Mitogen-activated protein kinase kinase kinase kinase 4	C (7)		3220	581
MAP7D1	C1	-1.21906	-0.435892	0.703508	-0.102575	-0.297827	-0.432187	1.42119	-2.06786	-0.0300327	0.217017	-1.31228	-1.32913	0.884319	0.782352	1.05454	1.37167	0.328962	0.463272	-	-	-	-	-	-	-	-	-	+	1.45422	0.0611316	1.12159	2.43517	1.45085	0.00812669	Q3KQU3	Q3KQU3	MA7D1_HUMAN	MAP7 domain-containing protein 1	C (7)		3221	2199
TACC3	C1	-0.62782	-0.881036	-1.0676	0.49908	-1.14306	-0.859994	-0.964532	0.0196311	-1.04754	-0.179538	0.289406	-0.439087	0.783549	0.884718	1.45905	2.49575	0.393513	0.385502	Unclassified_3	+	STIC_Epithelium PAX8 pos	HALLMARK_E2F_TARGETS;HALLMARK_G2M_CHECKPOINT	NOTCH3 Activation and Transmission of Signal to the Nucleus	-	-	-	-	+	2.37705	0.0106972	1.25439	3.68707	3.13375	0.000176432	Q9Y6A5	Q9Y6A5	TACC3_HUMAN	Transforming acidic coiled-coil-containing protein 3	C (7)		3222	4636
CBX2	C1	-0.556947	-0.941875	0.0431731	0.399991	-0.698528	-0.749633	-1.6708	-1.08404	-0.588406	-0.608524	0.381825	0.0624091	0.882673	0.407475	1.24468	2.61333	0.607098	0.256092	-	+	STIC_Epithelium PAX8 pos	-	Oxidative Stress Induced Senescence;Regulation of PTEN gene transcription;RUNX1 interacts with co-factors whose precise effect on RUNX1 targets is not known;SUMOylation of chromatin organization proteins;SUMOylation of DNA damage response and repair proteins;SUMOylation of RNA binding proteins	WP_MAMMALIAN_DISORDER_OF_SEXUAL_DEVELOPMENT	-	-	-	+	2.17202	0.0151255	1.21583	3.40366	2.50361	0.000735823	Q14781	Q14781	CBX2_HUMAN	Chromobox protein homolog 2	C (7)		3223	1999
ACAA1	C1	-0.543138	0.269181	-0.302898	0.0566671	-0.89064	-0.461251	-0.984303	-0.989801	-1.04389	-0.568292	-0.102941	0.222344	1.16245	-0.0751434	0.277129	3.0864	-0.170886	1.059	-	+	STIC_Epithelium PAX8 pos	HALLMARK_FATTY_ACID_METABOLISM;HALLMARK_OXIDATIVE_PHOSPHORYLATION;HALLMARK_PEROXISOME;HALLMARK_UV_RESPONSE_UP	alpha-linolenic acid (ALA) metabolism;Beta-oxidation of very long chain fatty acids;Neutrophil degranulation	WP_AMINO_ACID_METABOLISM;WP_EICOSANOID_METABOLISM_VIA_CYCLOOXYGENASES_COX;WP_EICOSANOID_METABOLISM_VIA_LIPOOXYGENASES_LOX;WP_NUCLEAR_RECEPTORS_METAPATHWAY;WP_PPAR_SIGNALING_PATHWAY;WP_PPARALPHA_PATHWAY	+	FDA approved drug targets	3	+	1.66132	0.040765	0.703869	2.71326	1.84039	0.00586757	P09110	P09110	THIK_HUMAN	3-ketoacyl-CoA thiolase, peroxisomal	C (7)		3224	739
PGD	C1	-0.418469	-0.483555	-0.234002	-0.664189	-0.649323	-0.382868	0.255766	-0.431235	-0.139527	-0.205961	-0.745298	-0.220247	1.11892	0.844064	0.0626851	3.42955	-0.910127	-0.22619	-	-	-	HALLMARK_XENOBIOTIC_METABOLISM	Pentose phosphate pathway (hexose monophosphate shunt)	WP_METABOLIC_REPROGRAMMING_IN_COLON_CANCER;WP_NRF2_PATHWAY;WP_NUCLEAR_RECEPTORS_METAPATHWAY;WP_PENTOSE_PHOSPHATE_METABOLISM;WP_VEGFAVEGFR2_SIGNALING	-	-	-	+	0.801825	0.23567	0.549945	1.52669	1.08446	0.0294985	P52209	P52209	6PGD_HUMAN	6-phosphogluconate dehydrogenase, decarboxylating	C (7)		3225	1402
STAT1	C1	-1.07028	-0.431877	0.28349	-0.234049	-0.24217	0.0388976	-0.273148	-0.492833	-1.09223	-0.249564	-1.05981	-0.657661	1.97112	0.0448793	0.0900045	2.86756	0.474123	0.0335415	-	+	STIC_Epithelium PAX8 pos	HALLMARK_ALLOGRAFT_REJECTION;HALLMARK_IL6_JAK_STAT3_SIGNALING;HALLMARK_INTERFERON_GAMMA_RESPONSE	Downstream signal transduction;Growth hormone receptor signaling;Interleukin-20 family signaling;Interleukin-21 signaling;Interleukin-27 signaling;Interleukin-35 Signalling;Interleukin-4 and 13 signaling;Interleukin-6 signaling;ISG15 antiviral mechanism;NOTCH3 Intracellular Domain Regulates Transcription;Regulation of RUNX2 expression and activity;Signaling by cytosolic FGFR1 fusion mutants;Signa…	WP_2Q13_COPY_NUMBER_VARIATION_SYNDROME;WP_ACUTE_VIRAL_MYOCARDITIS;WP_ADIPOGENESIS;WP_AGERAGE_PATHWAY;WP_ALLOGRAFT_REJECTION;WP_BRAINDERIVED_NEUROTROPHIC_FACTOR_BDNF_SIGNALING_PATHWAY;WP_CCL18_SIGNALING_PATHWAY;WP_CHEMOKINE_SIGNALING_PATHWAY;WP_EBOLA_VIRUS_INFECTION_IN_HOST;WP_EGFEGFR_SIGNALING_PATHWAY;WP_ENDOCHONDRAL_OSSIFICATION;WP_ENDOCHONDRAL_OSSIFICATION_WITH_SKELETAL_DYSPLASIAS;WP_ENDODERM_D…	-	-	-	+	1.87373	0.0268902	1.00252	2.99866	2.03667	0.00258148	P42224	P42224	STAT1_HUMAN	Signal transducer and activator of transcription 1-alpha/beta	C (7)		3226	1228
RAB10	C1	-0.580982	-0.247669	-0.108467	-0.858154	-0.251917	-0.779591	0.536933	-0.659626	-1.28522	-0.695878	-0.746026	-0.617208	1.84851	-0.418572	0.272387	1.99128	0.868429	1.73177	-	+	STIC_Epithelium PAX8 pos	-	Neutrophil degranulation;RAB GEFs exchange GTP for GDP on RABs;RAB geranylgeranylation;Translocation of GLUT4 to the plasma membrane	WP_FOCAL_ADHESION_PI3KAKTMTORSIGNALING_PATHWAY	-	-	-	+	2.22366	0.0138908	0.404629	3.47459	2.86101	0.00341579	P61026	P61026	RAB10_HUMAN	Ras-related protein Rab-10	C (7)		3227	1523
TTK	C1	-0.909974	-0.110783	-0.222264	-0.609112	-0.364741	-0.462629	0.840993	-0.80334	-0.799892	-0.853741	-1.58547	-0.887829	1.40795	0.664161	0.201662	1.80638	1.22722	1.46141	-	+	STIC_Epithelium PAX8 pos	HALLMARK_G2M_CHECKPOINT;HALLMARK_MITOTIC_SPINDLE;HALLMARK_SPERMATOGENESIS	-	WP_CELL_CYCLE;WP_RETINOBLASTOMA_GENE_IN_CANCER	-	-	-	+	2.90596	0.00419008	1.71379	4.44656	3.74734	5.1e-05	P33981	P33981	TTK_HUMAN	Dual specificity protein kinase TTK	C (7)		3228	1140
HIP1	C1	-0.463468	-0.924514	-0.318704	-0.0193704	-0.0360016	-0.461889	1.16925	-0.101783	-1.16794	-1.29136	-0.762749	-0.458105	0.256619	0.450068	-0.0437283	2.87178	-0.0729868	1.37487	-	-	-	-	Clathrin-mediated endocytosis	WP_DYRK1A	-	-	-	+	1.20044	0.103741	0.425239	2.09091	1.37697	0.0250851	O00291	O00291	HIP1_HUMAN	Huntingtin-interacting protein 1	C (7)		3229	119
OSBPL9	C1	-0.142164	0.467421	1.19089	-0.74087	-0.0889088	-0.454224	-1.3194	-1.07379	-1.23733	-0.519679	0.19178	-0.860545	2.16823	-0.416239	0.738925	1.69019	0.814525	-0.408801	-	+	STIC_Epithelium PAX8 pos	-	Synthesis of bile acids and bile salts	-	-	-	-	+	2.02209	0.02	0.266295	3.19923	1.85654	0.0364218	Q96SU4	Q96SU4	OSBL9_HUMAN	Oxysterol-binding protein-related protein 9	C (7)		3230	3510
INPP4A	C1	-0.42587	-0.0810512	-0.195182	-0.446748	1.49226	-0.851933	-0.848404	-0.390438	-1.77884	-0.279714	-0.111498	-0.255864	0.92902	1.03344	0.112836	2.37986	0.802955	-1.08483	-	-	-	-	Synthesis of IP2, IP, and Ins in the cytosol;Synthesis of PIPs at the early endosome membrane;Synthesis of PIPs at the plasma membrane	WP_INSULIN_SIGNALING	-	-	-	+	1.47043	0.0590601	0.786	2.45699	1.1849	0.0214961	Q96PE3	Q96PE3	INP4A_HUMAN	Inositol polyphosphate-4-phosphatase type I A	C (7)		3231	3457
GBP1	C1	-1.03747	-0.649503	-0.594157	-0.129037	-0.235706	-0.505063	-0.00931452	-0.105556	-0.503048	-0.190815	-0.0218318	-0.168622	1.42533	-0.57199	1.08058	2.32024	1.6178	-1.72183	-	-	-	-	Interferon gamma signaling	WP_TYPE_II_INTERFERON_SIGNALING	-	-	-	+	0.697094	0.289354	0.498376	1.36932	1.05189	0.0316961	P32455	P32455;Q9H0R5	GBP1_HUMAN	Guanylate-binding protein 1	C (7)		3232	1130
EIF2AK2	C1	-0.198777	-0.472599	-0.722295	-0.460049	0.173337	0.228942	0.0804664	-0.921142	-0.476073	-0.573472	-0.706858	-0.634879	2.24699	-0.625352	0.990655	2.42116	0.61976	-0.96982	-	-	-	HALLMARK_INFLAMMATORY_RESPONSE;HALLMARK_INTERFERON_ALPHA_RESPONSE;HALLMARK_INTERFERON_GAMMA_RESPONSE	Inhibition of PKR;ISG15 antiviral mechanism	WP_ALZHEIMERS_DISEASE;WP_ALZHEIMERS_DISEASE_AND_MIRNA_EFFECTS;WP_EBOLA_VIRUS_INFECTION_IN_HOST;WP_ENDOPLASMIC_RETICULUM_STRESS_RESPONSE_IN_CORONAVIRUS_INFECTION;WP_HOSTPATHOGEN_INTERACTION_OF_HUMAN_CORONAVIRUSES_INTERFERON_INDUCTION;WP_MEASLES_VIRUS_INFECTION;WP_PDGFRBETA_PATHWAY;WP_ROLES_OF_CERAMIDES_IN_DEVELOPMENT_OF_INSULIN_RESISTANCE;WP_TRANSLATION_FACTORS;WP_TYPE_I_INTERFERON_INDUCTION_AND_S…	-	-	-	+	1.3004	0.0840292	0.416136	2.22728	1.34407	0.030288	P19525	P19525	E2AK2_HUMAN	Interferon-induced, double-stranded RNA-activated protein kinase	C (7)		3233	932
IGF2R	C1	-1.06844	-0.0453733	0.0703774	0.0418369	-0.671075	-0.335423	0.305385	-0.385203	-1.36752	-0.381809	-0.424017	-0.412666	0.837538	-0.473919	2.2744	2.4115	0.401425	-0.777014	-	-	-	HALLMARK_APOPTOSIS;HALLMARK_IL2_STAT5_SIGNALING;HALLMARK_PROTEIN_SECRETION	Cargo recognition for clathrin-mediated endocytosis;Clathrin-mediated endocytosis;Golgi Associated Vesicle Biogenesis;Neutrophil degranulation;Retrograde transport at the Trans-Golgi-Network	WP_TROP2_REGULATORY_SIGNALING	-	-	-	+	1.18632	0.106825	0.709485	2.07155	1.27241	0.0176202	P11717	P11717	MPRI_HUMAN	Cation-independent mannose-6-phosphate receptor	C (7)		3234	809
MIX23	C1	-0.230897	0.227896	-0.729257	-0.860598	-1.39621	-0.88459	-0.838497	-0.51588	-0.113142	-0.525059	-0.197966	-0.576975	-0.421479	2.17785	0.820878	1.3315	1.08324	1.64918	-	+	STIC_Epithelium PAX8 pos	HALLMARK_FATTY_ACID_METABOLISM	-	-	-	-	-	+	2.71016	0.00611296	0.607167	4.15987	3.46261	0.000421818	Q4VC31	Q4VC31	MIX23_HUMAN	Protein MIX23	C (6)		3235	2226
AKAP8	C1	-0.144942	-0.64001	-1.19623	-0.528533	-0.89507	-1.42046	-0.637354	-0.0177456	-0.0730608	-0.268327	0.0516181	-0.818362	-0.139711	2.26582	0.749442	1.5131	0.62046	1.57937	-	+	STIC_Epithelium PAX8 pos	-	-	WP_G_PROTEIN_SIGNALING_PATHWAYS	-	-	-	+	2.37345	0.0107275	0.527266	3.68205	3.75558	0.000272675	O43823	O43823	AKAP8_HUMAN	A-kinase anchor protein 8	C (6)		3236	318
POLDIP2	C1	-0.55325	0.0927898	-0.874797	-0.605803	-1.58962	-1.34872	-0.551805	-0.302885	0.0452758	-0.135476	-0.436465	-0.11645	-0.316558	2.2569	1.61933	1.21943	0.855664	0.742432	-	+	STIC_Epithelium PAX8 pos	-	-	-	-	-	-	+	2.29274	0.0123669	0.406168	3.56993	3.45809	0.000750229	Q9Y2S7	Q9Y2S7	PDIP2_HUMAN	Polymerase delta-interacting protein 2	C (6)		3237	4507
SHMT2	C1	-0.79474	0.047695	-0.558879	-0.637435	-0.999684	-0.99651	-1.17996	-0.238009	-0.450073	-0.373446	-0.530771	-0.183648	0.117215	2.51388	1.43183	1.51011	0.589421	0.733008	-	+	STIC_Epithelium PAX8 pos	HALLMARK_MTORC1_SIGNALING;HALLMARK_XENOBIOTIC_METABOLISM	Metabolism of folate and pterines	WP_CLEAR_CELL_RENAL_CELL_CARCINOMA_PATHWAYS;WP_DISORDERS_OF_FOLATE_METABOLISM_AND_TRANSPORT;WP_FOLATE_METABOLISM;WP_METABOLIC_REPROGRAMMING_IN_COLON_CANCER;WP_NEUROINFLAMMATION_AND_GLUTAMATERGIC_SIGNALING;WP_ONECARBON_METABOLISM;WP_SERINE_METABOLISM;WP_TRANSSULFURATION_ONECARBON_METABOLISM_AND_RELATED_PATHWAYS;WP_VITAMIN_B12_METABOLISM	-	-	-	+	2.84047	0.0048659	1.56664	4.34987	3.96497	4.09e-05	P34897	P34897	GLYM_HUMAN	Serine hydroxymethyltransferase, mitochondrial	C (6)		3238	1146
C19orf53	C1	-0.199898	-0.392857	-1.65593	-0.448613	-0.743218	-1.02414	-0.255805	0.166722	-0.378373	-0.631805	-0.481538	-0.133156	-0.765521	1.90796	1.37434	0.60775	1.18959	1.86448	-	+	STIC_Epithelium PAX8 pos	-	-	-	-	-	-	+	1.94728	0.0234142	0.542192	3.09791	2.97227	0.000825795	Q9UNZ5	Q9UNZ5	L10K_HUMAN	Leydig cell tumor 10 kDa protein homolog	C (6)		3239	4441
TRIR	C1	-0.213797	-1.22633	-1.09552	-0.609107	-1.00866	-1.01902	-0.676517	-0.308284	-0.0265848	-0.286558	0.0193605	-0.134634	-0.244566	1.61981	2.07894	0.760581	0.563053	1.80784	-	+	STIC_Epithelium PAX8 pos	-	-	-	-	-	-	+	2.26888	0.0128371	0.586585	3.53694	3.99939	0.000132768	Q9BQ61	Q9BQ61	TRIR_HUMAN	Telomerase RNA component interacting RNase	C (6)		3240	3584
DHX36	C1	-0.517849	-0.406721	-0.911424	-1.06536	-1.06055	-1.43255	-0.325231	-0.147461	0.807935	-0.256302	-0.812945	0.0126523	-0.566778	1.42542	1.54827	1.31431	0.662448	1.73214	-	+	STIC_Epithelium PAX8 pos	-	DEx/H-box helicases activate type I IFN and inflammatory cytokines production;TRAF6 mediated IRF7 activation;TRAF6 mediated IRF7 activation in TLR7/8 or 9 signaling	WP_VEGFAVEGFR2_SIGNALING	-	-	-	+	1.69832	0.0381603	0.211974	2.7629	3.48619	0.00357513	Q9H2U1	Q9H2U1	DHX36_HUMAN	ATP-dependent DNA/RNA helicase DHX36	C (6)		3241	3833
FAM241B	C1	0.0924646	-0.836613	-0.664175	-0.423646	-0.410387	-1.22206	-0.538509	0.335681	0.43525	-0.494195	-1.51219	-0.511872	-0.970387	1.25841	1.46006	1.95368	0.863023	1.18547	-	+	STIC_Epithelium PAX8 pos	-	-	-	-	-	-	+	1.61881	0.0444683	1.15593	2.65624	2.21285	0.00123306	Q96D05	Q96D05	F241B_HUMAN	Protein FAM241B	C (6)		3242	3286
NUSAP1	C1	-0.30149	-0.824188	-0.642516	-0.829803	-0.74188	0.184922	-1.36563	-0.54173	-0.694683	0.0945185	-0.613531	-0.276274	-0.687432	0.929733	1.78305	1.40913	1.36023	1.75757	Unclassified_3	+	STIC_Epithelium PAX8 pos	HALLMARK_G2M_CHECKPOINT;HALLMARK_MITOTIC_SPINDLE	-	-	-	-	-	+	2.5182	0.0085487	1.33035	3.88533	3.25301	0.000146341	Q9BXS6	Q9BXS6	NUSAP_HUMAN	Nucleolar and spindle-associated protein 1	C (6)		3243	3713
CENPF	C1	-0.832048	-0.408154	-0.41666	-0.62017	-0.240431	0.045181	-1.16981	-0.97315	-0.448889	-0.520492	-1.19741	-0.229826	-0.273279	1.06118	1.85385	1.09145	1.4895	1.78917	Unclassified_3	+	STIC_Epithelium PAX8 pos	HALLMARK_G2M_CHECKPOINT;HALLMARK_MITOTIC_SPINDLE	Amplification of signal from unattached kinetochores via a MAD2 inhibitory signal;Mitotic Prometaphase;Polo-like kinase mediated events;Resolution of Sister Chromatid Cohesion;RHO GTPases Activate Formins;Separation of Sister Chromatids	WP_CILIOPATHIES;WP_GASTRIC_CANCER_NETWORK_1	-	-	-	+	3.48612	0.00169295	1.99329	5.34375	4.43798	1.6e-05	P49454	P49454	CENPF_HUMAN	Centromere protein F	C (6)		3244	1321
NDC80	C1	-0.726895	0.351916	-0.962307	-0.0894588	-0.796044	0.0556835	-1.82198	-0.559654	-0.602796	-0.249918	-1.35345	0.756243	-0.11851	0.605493	1.5996	1.30906	0.93155	1.67146	Unclassified_3	+	STIC_Epithelium PAX8 pos	HALLMARK_G2M_CHECKPOINT;HALLMARK_MITOTIC_SPINDLE	Amplification of signal from unattached kinetochores via a MAD2 inhibitory signal;Mitotic Prometaphase;Resolution of Sister Chromatid Cohesion;RHO GTPases Activate Formins;Separation of Sister Chromatids	-	-	-	-	+	2.28985	0.0123925	1.23862	3.56593	2.54888	0.000653252	O14777	O14777	NDC80_HUMAN	Kinetochore protein NDC80 homolog	C (6)		3245	181
CCNB1	C1	-1.22013	0.137745	-1.32869	-0.0580201	-0.377914	0.246323	-0.38859	-1.56212	-0.091639	-0.991523	-0.799124	0.0496905	-0.355927	1.40016	1.5318	1.39468	1.15371	1.25957	Unclassified_3	+	STIC_Epithelium PAX8 pos	-	Activation of NIMA Kinases NEK9, NEK6, NEK7;APC/C:Cdc20 mediated degradation of Cyclin B;Chk1/Chk2(Cds1) mediated inactivation of Cyclin B:Cdk1 complex;Condensation of Prometaphase Chromosomes;Condensation of Prophase Chromosomes;Cyclin A/B1/B2 associated events during G2/M transition;Depolymerisation of the Nuclear Lamina;E2F-enabled inhibition of pre-replication complex formation;G2/M DNA repli…	WP_AMPACTIVATED_PROTEIN_KINASE_SIGNALING;WP_ATM_SIGNALING_PATHWAY;WP_CELL_CYCLE;WP_DNA_DAMAGE_RESPONSE;WP_G1_TO_S_CELL_CYCLE_CONTROL;WP_MIRNA_REGULATION_OF_DNA_DAMAGE_RESPONSE;WP_NETWORK_MAP_OF_SARSCOV2_SIGNALING_PATHWAY;WP_RETINOBLASTOMA_GENE_IN_CANCER	-	-	-	+	2.91114	0.00417427	1.61797	4.45425	3.03542	0.000191091	P14635	P14635	CCNB1_HUMAN	G2/mitotic-specific cyclin-B1	C (6)		3246	850
SFSWAP	C1	-0.353604	-0.297396	-2.03601	-0.840869	0.205395	-0.113523	-1.04399	-0.0493017	0.0651757	0.0216949	0.26669	-0.860703	-0.707227	-0.147441	2.0537	1.50208	0.815996	1.51933	-	-	-	-	-	WP_MRNA_PROCESSING	-	-	-	+	1.32014	0.0807126	0.463853	2.25407	1.60758	0.0114599	Q12872	Q12872	SFSWA_HUMAN	Splicing factor, suppressor of white-apricot homolog	C (6)		3247	1825
PRPF3	C1	0.25278	-0.509527	-2.86148	-0.787643	0.353208	-0.284157	-0.575431	0.330963	0.0819997	-0.514456	-0.181529	-0.195194	-0.496477	0.473712	1.68133	1.28096	0.838105	1.11283	-	+	STIC_Epithelium PAX8 pos	HALLMARK_UV_RESPONSE_UP	mRNA Splicing - Major Pathway	WP_MRNA_PROCESSING	-	-	-	+	1.80339	0.0305817	0.175199	2.904	1.60835	0.048859	O43395	O43395	PRPF3_HUMAN	U4/U6 small nuclear ribonucleoprotein Prp3	C (6)		3248	275
ZMYND8	C1	-0.255899	0.300152	-2.31383	-0.489805	-0.649853	-1.09986	-0.164333	0.504473	-0.00363056	-0.0875176	0.179205	-0.269779	-0.82316	-0.192736	1.81083	1.67353	1.51503	0.367175	-	-	-	-	-	-	-	-	-	+	0.78767	0.242365	0.199575	1.50573	1.58423	0.0215501	Q9ULU4	Q9ULU4	ZMYD8_HUMAN	MYND-type zinc finger-containing chromatin reader ZMYND8	C (6)		3249	4406
TELO2	C1	-0.111725	0.199944	-1.6288	-1.45303	-0.244954	-0.469561	-0.217221	-0.15871	0.676891	0.199689	-0.459887	0.281429	-2.05355	1.61151	0.972337	1.27622	1.24036	0.339059	-	-	-	-	-	WP_FRAGILE_X_SYNDROME;WP_MALIGNANT_PLEURAL_MESOTHELIOMA	-	-	-	+	0.401586	0.505641	0.299509	0.885547	0.929324	0.044469	Q9Y4R8	Q9Y4R8	TELO2_HUMAN	Telomere length regulation protein TEL2 homolog	C (6)		3250	4580
GRN	C1	-0.491952	-0.666759	-1.33382	-1.21295	-0.388091	-0.963038	0.463203	-0.0129071	0.0725535	1.06531	-1.09278	-1.36549	1.40808	1.26112	0.725899	0.041642	0.815055	1.67492	-	-	-	-	Neutrophil degranulation	WP_IL18_SIGNALING_PATHWAY	-	-	-	+	1.52629	0.0526254	0.912834	2.53207	3.00475	0.000246117	P28799	P28799	GRN_HUMAN	Progranulin	C (6)		3251	1065
IGSF3	C1	0.867772	-0.239971	-1.05893	-1.48626	0.785709	-1.26349	-1.00923	-1.26959	0.962092	0.786241	-0.867542	-1.21872	0.900543	0.682299	0.818393	0.876025	0.780559	0.95409	-	+	STIC_Epithelium PAX8 pos	HALLMARK_HEME_METABOLISM	-	-	-	-	-	+	1.88953	0.026	1.6143	3.01995	1.50309	0.00538821	O75054	O75054	IGSF3_HUMAN	Immunoglobulin superfamily member 3	C (6)		3252	383
UBE2H	C1	0.316597	-1.40749	-0.975799	-1.0374	-0.107898	0.834852	0.271857	-0.285538	0.166175	0.149148	-1.64893	-1.81572	1.08478	0.365665	1.5738	0.940138	0.63304	0.942711	-	+	STIC_Epithelium PAX8 pos	-	Antigen processing: Ubiquitination & Proteasome degradation;Synthesis of active ubiquitiroles of E1 and E2 enzymes	WP_CILIARY_LANDSCAPE	-	-	-	+	2.18343	0.0149087	1.39934	3.41931	1.97343	0.00198488	P62256	P62256	UBE2H_HUMAN	Ubiquitin-conjugating enzyme E2 H	C (6)		3253	1559
PPP1CB	C1	0.0483037	-1.51588	-1.69799	-1.72562	0.543941	0.709667	0.234262	-0.258357	0.0733296	0.279551	-0.602847	-1.08909	0.956496	0.177188	1.87362	0.559588	0.223536	1.2103	-	+	STIC_Epithelium PAX8 pos	-	Circadian Clock;Downregulation of TGF-beta receptor signaling;Regulation of PLK1 Activity at G2/M Transition;RHO GTPases activate CIT;RHO GTPases activate PAKs;RHO GTPases activate PKNs;RHO GTPases Activate ROCKs;Triglyceride catabolism	WP_22Q112_COPY_NUMBER_VARIATION_SYNDROME;WP_AIRWAY_SMOOTH_MUSCLE_CELL_CONTRACTION;WP_CIRCADIAN_RHYTHM_GENES;WP_COMMON_PATHWAYS_UNDERLYING_DRUG_ADDICTION;WP_ENDOPLASMIC_RETICULUM_STRESS_RESPONSE_IN_CORONAVIRUS_INFECTION;WP_FOCAL_ADHESION;WP_G13_SIGNALING_PATHWAY;WP_HIPPOMERLIN_SIGNALING_DYSREGULATION;WP_NEUROINFLAMMATION_AND_GLUTAMATERGIC_SIGNALING	-	-	-	+	1.93269	0.0240764	0.198779	3.0782	1.62668	0.0425006	P62140	P62140	PP1B_HUMAN	Serine/threonine-protein phosphatase PP1-beta catalytic subunit	C (6)		3254	1554
HAUS6	C1	0.0684126	-0.465069	-1.50912	-1.7424	-0.0369629	0.859926	-0.645868	-0.268627	-0.259192	-0.548949	-1.12159	-0.662555	1.09496	0.245718	1.63656	1.26172	0.572138	1.52089	-	+	STIC_Epithelium PAX8 pos	-	Anchoring of the basal body to the plasma membrane;AURKA Activation by TPX2;Loss of Nlp from mitotic centrosomes;Loss of proteins required for interphase microtubule organization from the centrosome;Recruitment of mitotic centrosome proteins and complexes;Recruitment of NuMA to mitotic centrosomes;Regulation of PLK1 Activity at G2/M Transition	-	-	-	-	+	4.08506	0.000672269	0.884467	6.36224	2.91922	0.000550567	Q7Z4H7	Q7Z4H7	HAUS6_HUMAN	HAUS augmin-like complex subunit 6	C (6)		3255	2623
KPNA4	C1	0.686598	-1.1044	-1.35663	-1.00739	0.0598222	0.273563	-0.499578	-0.934001	0.140538	-0.185065	-0.638991	-1.33251	0.548685	0.784582	2.17371	1.67329	0.756514	-0.0387362	-	+	STIC_Epithelium PAX8 pos	-	ISG15 antiviral mechanism;NS1 Mediated Effects on Host Pathways	WP_LEPTIN_SIGNALING_PATHWAY	-	-	-	+	2.5857	0.00769822	0.406106	3.9812	2.36693	0.00648259	O00629	O00629	IMA3_HUMAN	Importin subunit alpha-3	C (6)		3256	147
RNPC3	C1	-0.570891	-0.982571	-0.888968	-0.343028	0.273019	-1.42147	0.437672	0.509361	0.889997	-1.35716	-2.20851	0.624763	0.911306	0.597851	0.828422	0.857533	0.770455	1.07221	-	-	-	-	mRNA Splicing - Minor Pathway	-	-	-	-	+	1.09775	0.128559	1.28273	1.94927	1.73235	0.00294715	Q96LT9	Q96LT9	RNPC3_HUMAN	RNA-binding region-containing protein 3	C (6)		3257	3417
TLE1	C1	-0.594491	-0.626456	-0.924077	-0.667376	-0.754668	-0.88001	0.546476	1.12306	0.806799	0.72274	-1.96134	0.615169	-1.10925	1.22795	1.01664	-0.709332	1.20017	0.968	-	-	-	HALLMARK_HEDGEHOG_SIGNALING	Deactivation of the beta-catenin transactivating complex;Formation of the beta-catenin:TCF transactivating complex;NOTCH1 Intracellular Domain Regulates Transcription;Repression of WNT target genes	WP_INFLUENCE_OF_LAMINOPATHIES_ON_WNT_SIGNALING;WP_NOTCH_SIGNALING_PATHWAY;WP_OVERLAP_BETWEEN_SIGNAL_TRANSDUCTION_PATHWAYS_CONTRIBUTING_TO_LMNA_LAMINOPATHIES	-	-	-	+	0.0713378	0.896781	0.155558	0.19602	1.13177	0.0152582	Q04724	Q04724	TLE1_HUMAN	Transducin-like enhancer protein 1	C (6)		3258	1739
VKORC1L1	C1	-0.623635	-0.24759	-0.144359	-1.15401	-1.0608	-0.947206	0.96101	0.0237609	0.941711	0.97667	-1.4442	-1.40879	-0.963267	0.977474	0.860007	1.4092	1.04548	0.79854	-	-	-	-	Metabolism of vitamin K	WP_VITAMIN_K_METABOLISM_AND_ACTIVATION_OF_DEPENDENT_PROTEINS	+	FDA approved drug targets	7	+	0.562471	0.375164	0.668681	1.15778	1.34427	0.00961491	Q8N0U8	Q8N0U8	VKORL_HUMAN	Vitamin K epoxide reductase complex subunit 1-like protein 1	C (6)		3259	2810
PMS1	C1	-0.903951	0.790626	-0.258282	-2.12431	-1.30693	-1.42134	0.11609	0.756451	1.15112	-0.0707193	0.0725764	-1.22146	0.288661	0.959626	0.737025	1.25369	0.489495	0.691633	-	-	-	-	-	-	-	-	-	+	0.903196	0.190077	0.378947	1.67452	2.0401	0.00264429	P54277	P54277	PMS1_HUMAN	PMS1 protein homolog 1	C (6)		3260	1441
ARHGEF3	C1	-0.653609	0.472779	-1.38316	-1.67906	0.343342	-0.649772	1.27191	-1.06131	0.601038	-0.559982	-0.488037	-1.14652	-0.231429	0.353006	1.28841	1.0034	1.05033	1.46867	-	-	-	HALLMARK_MITOTIC_SPINDLE	G alpha (12/13) signalling events;NRAGE signals death through JNK;Rho GTPase cycle	-	-	-	-	+	1.29995	0.0840546	0.632758	2.22667	1.56117	0.00839508	Q9NR81	Q9NR81	ARHG3_HUMAN	Rho guanine nucleotide exchange factor 3	C (6)		3261	4040
PLCG1	C1	-0.975561	-0.555446	-0.303757	-1.18419	-0.770709	-1.35448	0.451021	-0.450378	-0.643928	0.0323405	-0.194363	-0.277164	0.964318	2.14921	1.81051	1.4106	-0.223526	0.115507	-	+	STIC_Epithelium PAX8 pos	HALLMARK_APICAL_JUNCTION;HALLMARK_PI3K_AKT_MTOR_SIGNALING	Antigen activates B Cell Receptor (BCR) leading to generation of second messengers;Constitutive Signaling by EGFRvIII;Constitutive Signaling by Ligand-Responsive EGFR Cancer Variants;DAG and IP3 signaling;DAP12 signaling;Downstream signal transduction;EGFR interacts with phospholipase C-gamma;FCERI mediated Ca+2 mobilization;FCERI mediated MAPK activation;FGFR2;FGFR3;FGFR4;Frs2-mediated activatio…	WP_ANGIOGENESIS;WP_B_CELL_RECEPTOR_SIGNALING_PATHWAY;WP_BDNFTRKB_SIGNALING;WP_BRAINDERIVED_NEUROTROPHIC_FACTOR_BDNF_SIGNALING_PATHWAY;WP_CORTICOTROPINRELEASING_HORMONE_SIGNALING_PATHWAY;WP_EGFEGFR_SIGNALING_PATHWAY;WP_EGFR_TYROSINE_KINASE_INHIBITOR_RESISTANCE;WP_ERBB_SIGNALING_PATHWAY;WP_FRAGILE_X_SYNDROME;WP_GASTRIN_SIGNALING_PATHWAY;WP_GLIOBLASTOMA_SIGNALING_PATHWAYS;WP_GPR40_PATHWAY;WP_IL1_SIG…	-	-	-	+	1.82826	0.0292689	0.706435	2.93744	3.42905	0.000190968	P19174	P19174	PLCG1_HUMAN	1-phosphatidylinositol 4,5-bisphosphate phosphodiesterase gamma-1	C (6)		3262	925
LETM1	C1	-0.56357	-0.38303	-0.662483	-0.596054	-0.928427	-1.05574	-0.587924	-0.410766	-0.393499	-0.246771	-0.224782	-0.312382	0.303099	2.09295	2.31839	1.58383	0.547748	-0.48058	-	+	STIC_Epithelium PAX8 pos	-	Mitochondrial calcium ion transport	-	-	-	-	+	1.9679	0.0223888	1.63159	3.1258	3.11523	0.000133808	O95202	O95202	LETM1_HUMAN	Mitochondrial proton/calcium exchanger protein	C (6)		3263	524
S100A4	C1	-1.47667	-0.523235	-0.291853	-0.549429	0.149554	-0.27855	0.220226	0.0206107	-0.607629	0.307878	-0.715116	-1.37693	0.165505	2.08786	1.58225	1.94585	0.0191274	-0.67945	Unclassified _1;Unclassified_2;Unclassified_3	-	-	HALLMARK_ANGIOGENESIS;HALLMARK_HYPOXIA;HALLMARK_P53_PATHWAY	-	WP_HAIR_FOLLICLE_DEVELOPMENT_CYTODIFFERENTIATION_PART_3_OF_3;WP_VITAMIN_D_RECEPTOR_PATHWAY	-	-	-	+	1.29737	0.0844905	1.10344	2.22316	1.60452	0.00517862	P26447	P26447	S10A4_HUMAN	Protein S100-A4	C (6)		3264	1033
ECE1	C1	-1.01993	-1.39862	-1.81779	-0.639795	-0.703151	-0.157623	0.656417	-0.800359	-0.341713	0.625614	0.101262	-0.775489	0.878815	1.83462	1.17877	1.02556	0.881792	0.471624	-	+	STIC_Epithelium PAX8 pos	-	Peptide ligand-binding receptors	WP_CORTICOTROPINRELEASING_HORMONE_SIGNALING_PATHWAY;WP_ENDOTHELIN_PATHWAYS;WP_MELATONIN_METABOLISM_AND_EFFECTS;WP_SUDDEN_INFANT_DEATH_SYNDROME_SIDS_SUSCEPTIBILITY_PATHWAYS	-	-	-	+	2.23495	0.013411	0.947203	3.49013	4.04362	4.01e-05	P42892	P42892	ECE1_HUMAN	Endothelin-converting enzyme 1	C (6)		3265	1242
KPNA6	C1	-0.447873	-0.423782	-1.87241	-1.4294	-0.240923	0.0465964	0.131336	-0.497516	0.294715	0.147988	-0.671315	-0.705521	1.30097	2.11582	0.817789	1.30055	0.824865	-0.691893	-	+	STIC_Epithelium PAX8 pos	-	-	-	-	-	-	+	1.68426	0.0392041	0.28128	2.74403	2.38111	0.00752659	O60684	O60684	IMA7_HUMAN	Importin subunit alpha-7	C (6)		3266	360
PKN1	C1	-0.49245	-0.698253	-1.08351	-0.681146	-0.234948	-0.456348	-0.298406	-0.132292	0.174502	-0.0573155	-0.33022	-0.080097	1.27042	1.84336	2.74043	0.015448	-0.266441	-1.23274	-	-	-	-	Activated PKN1 stimulates transcription of AR (androgen receptor) regulated genes KLK2 and KLK3;RHO GTPases activate PKNs	WP_APOPTOSISRELATED_NETWORK_DUE_TO_ALTERED_NOTCH3_IN_OVARIAN_CANCER;WP_G13_SIGNALING_PATHWAY;WP_IL18_SIGNALING_PATHWAY;WP_PI3KAKT_SIGNALING_PATHWAY	-	-	-	+	0.714582	0.279647	0.2547	1.39598	1.26951	0.0383434	Q16512	Q16512	PKN1_HUMAN	Serine/threonine-protein kinase N1	C (6)		3267	2121
DNM1L	C1	-0.539201	-0.358477	-0.893341	-0.446624	-1.22972	-1.39298	0.313034	0.0420049	0.00616758	0.167541	0.385525	0.0274618	0.386145	1.76554	2.51462	0.402517	0.273501	-1.42373	-	-	-	HALLMARK_APOPTOSIS;HALLMARK_PROTEIN_SECRETION	Apoptotic execution phase	WP_CAMKK2_PATHWAY;WP_SYNAPTIC_VESICLE_PATHWAY	-	-	-	+	0.401413	0.50565	0.198204	0.88524	1.61449	0.0120949	O00429	O00429	DNM1L_HUMAN	Dynamin-1-like protein	C (6)		3268	126
YARS1	C1	-0.29295	-0.78604	-1.23322	-0.686749	-1.18537	-0.301103	-0.321762	-0.57992	-0.0118662	0.135973	-0.0228162	0.265917	1.12126	1.26108	2.29233	1.55685	0.107761	-1.31936	-	-	-	-	Cytosolic tRNA aminoacylation	-	-	-	-	+	0.943985	0.175617	0.238328	1.73298	1.93015	0.0136668	P54577	P54577	SYYC_HUMAN	Tyrosine--tRNA ligase, cytoplasmic	C (6)		3269	1443
UAP1L1	C1	-0.415798	-0.490068	-1.03083	-1.42788	-0.971457	-0.066164	0.910907	-0.861437	-0.0718539	-0.417522	0.640018	-0.0798141	1.25214	1.52971	1.99477	0.240011	0.670804	-1.40554	-	-	-	-	-	-	-	-	-	+	0.610038	0.343025	0.491516	1.23391	1.50436	0.00821858	Q3KQV9	Q3KQV9	UAP1L_HUMAN	UDP-N-acetylhexosamine pyrophosphorylase-like protein 1	C (6)		3270	2200
FUBP1	C1	0.186264	-1.39336	-1.17806	-0.0134455	0.223022	-0.276978	-1.02353	0.158831	0.0936905	-0.679453	-0.705676	-0.146255	-0.751089	2.50752	2.07638	0.317113	0.297393	0.307641	-	-	-	-	-	-	-	-	-	+	1.25439	0.0926497	0.335381	2.16467	1.31712	0.0371854	Q96AE4	Q96AE4	FUBP1_HUMAN	Far upstream element-binding protein 1	C (6)		3271	3238
CAPRIN1	C1	0.196925	-0.56724	-1.16755	0.0904775	0.0517218	-0.353758	-1.02128	-0.609276	0.414639	-0.302345	-0.674669	-0.824852	1.38722	2.15179	1.99967	0.350984	-1.27564	0.153177	-	-	-	-	-	-	-	-	-	+	1.32904	0.0793672	0.291214	2.26613	1.36378	0.0488766	Q14444	Q14444	CAPR1_HUMAN	Caprin-1	C (6)		3272	1973
FLNC	C1	-2.51899	-0.0996449	-0.130425	-0.0680571	-0.0682308	-0.6394	-0.0654763	-0.105532	-0.115886	0.134713	-0.0233448	0.220507	-0.201754	2.03321	2.36277	0.107853	-0.467834	-0.354478	-	-	-	HALLMARK_APICAL_JUNCTION	Cell-extracellular matrix interactions	WP_EBOLA_VIRUS_INFECTION_IN_HOST;WP_FOCAL_ADHESION;WP_MAPK_SIGNALING_PATHWAY	-	-	-	+	0.524393	0.402736	0.678823	1.09556	0.896193	0.0326047	Q14315	Q14315	FLNC_HUMAN	Filamin-C	C (6)		3273	1968
FLNA	C1	-2.53029	-0.848457	-0.15385	-0.341725	0.0570814	-1.7265	0.529015	0.244846	-0.33676	0.488046	0.210689	0.0938879	-0.40611	1.60441	1.5711	0.546307	0.546521	0.45178	-	-	-	HALLMARK_ALLOGRAFT_REJECTION;HALLMARK_EPITHELIAL_MESENCHYMAL_TRANSITION;HALLMARK_MITOTIC_SPINDLE	Cell-extracellular matrix interactions;GP1b-IX-V activation signalling;Platelet degranulation;RHO GTPases activate PAKs	WP_ANDROGEN_RECEPTOR_SIGNALING_PATHWAY;WP_EBOLA_VIRUS_INFECTION_IN_HOST;WP_FOCAL_ADHESION;WP_HYPOTHESIZED_PATHWAYS_IN_PATHOGENESIS_OF_CARDIOVASCULAR_DISEASE;WP_IL4_SIGNALING_PATHWAY;WP_JOUBERT_SYNDROME;WP_MAPK_SIGNALING_PATHWAY;WP_PROLACTIN_SIGNALING_PATHWAY	-	-	-	+	0.802081	0.235747	0.284525	1.52707	2.24854	0.00200451	P21333	P21333	FLNA_HUMAN	Filamin-A	C (6)		3274	960
PLOD1	C1	-1.8918	-0.646805	0.178647	-1.81414	-0.39234	-1.01358	0.0270703	-0.293738	-0.176089	-0.167168	0.217536	-0.144707	0.786357	2.11208	1.20321	0.5761	1.161	0.27836	Unclassified _1	+	STIC_Epithelium PAX8 pos	HALLMARK_EPITHELIAL_MESENCHYMAL_TRANSITION;HALLMARK_GLYCOLYSIS	Collagen biosynthesis and modifying enzymes	WP_TYPE_I_COLLAGEN_SYNTHESIS_IN_THE_CONTEXT_OF_OSTEOGENESIS_IMPERFECTA	-	-	-	+	2.6565	0.00677116	0.998362	4.08251	3.66028	7.22e-05	Q02809	Q02809	PLOD1_HUMAN	Procollagen-lysine,2-oxoglutarate 5-dioxygenase 1	C (6)		3275	1718
MGME1	C1	-1.78216	-0.192289	-1.56503	-1.9349	-0.490954	0.291795	-0.296012	-0.0564831	-0.0312979	-0.109878	0.230366	0.0105755	0.757276	1.64843	1.19939	0.995445	1.16859	0.157138	-	+	STIC_Epithelium PAX8 pos	-	-	-	-	-	-	+	3.11516	0.00297143	0.94039	4.76127	3.51895	9.41e-05	Q9BQP7	Q9BQP7	MGME1_HUMAN	Mitochondrial genome maintenance exonuclease 1	C (6)		3276	3598
AKAP1	C1	-1.60275	0.51903	-1.59023	-2.04772	-1.03985	-0.843926	-0.191832	0.752084	0.198644	0.467575	0.819722	0.579771	0.706793	1.45813	0.788452	0.154631	0.687446	0.184032	-	-	-	HALLMARK_ESTROGEN_RESPONSE_EARLY	Factors involved in megakaryocyte development and platelet production;Mitochondrial calcium ion transport	WP_G_PROTEIN_SIGNALING_PATHWAYS	-	-	-	+	0.413449	0.494795	0.154123	0.906551	3.42533	0.000135266	Q92667	Q92667	AKAP1_HUMAN	A-kinase anchor protein 1, mitochondrial	C (6)		3277	3158
POLG2	C1	-2.57585	0.32419	-1.62143	-0.732778	0.283321	0.136785	0.0440637	0.294477	0.160192	0.137748	0.316166	0.147263	0.774065	2.32311	-0.371809	-0.0615544	0.717419	-0.295375	-	-	-	HALLMARK_UV_RESPONSE_UP	Transcriptional activation of mitochondrial biogenesis	-	-	-	-	+	0.35132	0.555449	0.179305	0.794541	1.05641	0.0331975	Q9UHN1	Q9UHN1	DPOG2_HUMAN	DNA polymerase subunit gamma-2, mitochondrial	C (6)		3278	4323
RCOR3	C1	-1.55222	-0.298164	-1.39077	-0.0231716	-0.647196	-1.64142	0.176016	0.591582	0.346786	0.485759	0.724597	0.169148	-0.31676	-0.857241	1.37866	0.426132	0.14238	2.28588	-	-	-	-	-	-	-	-	-	+	0.0717251	0.896234	0.0299006	0.197013	1.97716	0.00855448	Q9P2K3	Q9P2K3	RCOR3_HUMAN	REST corepressor 3	C (6)		3279	4251
NFIB	C1	-0.986154	-0.971846	-1.12427	-0.269171	-1.03634	-1.29333	-0.0852622	0.272445	0.29471	0.682574	0.220362	0.343107	0.149456	-1.2134	1.32857	0.173945	1.15187	2.36273	-	-	-	HALLMARK_UV_RESPONSE_DN	RNA Polymerase III Abortive And Retractive Initiation;RNA Polymerase III Transcription Termination	WP_PATHWAYS_AFFECTED_IN_ADENOID_CYSTIC_CARCINOMA	-	-	-	+	0.313056	0.596184	0.254584	0.722832	2.2506	0.00151239	O00712	O00712	NFIB_HUMAN	Nuclear factor 1 B-type	C (6)		3280	149
SMC1A	C1	-0.598026	-0.819125	-2.31623	-0.555016	-0.490169	-1.20187	0.458057	0.906223	0.460182	0.466006	0.482686	0.71608	-0.263717	-1.05111	1.60362	0.285696	0.348678	1.56804	-	-	-	HALLMARK_E2F_TARGETS;HALLMARK_G2M_CHECKPOINT;HALLMARK_MITOTIC_SPINDLE	Cohesin Loading onto Chromatin;Establishment of Sister Chromatid Cohesion;Meiotic synapsis;Resolution of Sister Chromatid Cohesion;Separation of Sister Chromatids;SUMOylation of DNA damage response and repair proteins	WP_ATM_SIGNALING_IN_DEVELOPMENT_AND_DISEASE;WP_ATM_SIGNALING_PATHWAY;WP_CAMKK2_PATHWAY;WP_CELL_CYCLE;WP_COHESIN_COMPLEX_CORNELIA_DE_LANGE_SYNDROME;WP_CONSTITUTIVE_ANDROSTANE_RECEPTOR_PATHWAY;WP_DNA_DAMAGE_RESPONSE;WP_DNA_IRDAMAGE_AND_CELLULAR_RESPONSE_VIA_ATR;WP_DNA_IRDOUBLE_STRAND_BREAKS_AND_CELLULAR_RESPONSE_VIA_ATM;WP_MIRNA_REGULATION_OF_DNA_DAMAGE_RESPONSE;WP_MRNA_PROCESSING;WP_NUCLEAR_RECEPT…	-	-	-	+	0.150542	0.789599	-0.039715	-0.386722	2.46515	0.00679346	Q14683	Q14683	SMC1A_HUMAN	Structural maintenance of chromosomes protein 1A	C (6)		3281	1989
RAD21	C1	-0.459176	-0.912267	-2.1182	-0.448607	-0.675153	-1.4965	0.337054	0.716937	0.620468	0.504588	0.812551	0.572878	-0.072933	-1.02727	1.71322	0.0588886	0.405892	1.46763	Unclassified_3	-	-	HALLMARK_E2F_TARGETS;HALLMARK_G2M_CHECKPOINT	Cohesin Loading onto Chromatin;Establishment of Sister Chromatid Cohesion;Meiotic synapsis;Resolution of Sister Chromatid Cohesion;Separation of Sister Chromatids;SUMOylation of DNA damage response and repair proteins	WP_CELL_CYCLE;WP_COHESIN_COMPLEX_CORNELIA_DE_LANGE_SYNDROME;WP_PRION_DISEASE_PATHWAY;WP_REGULATION_OF_SISTER_CHROMATID_SEPARATION_AT_THE_METAPHASEANAPHASE_TRANSITION;WP_SMC1SMC3_ROLE_IN_DNA_DAMAGE_CORNELIA_DE_LANGE_SYNDROME	-	-	-	+	0.15695	0.781496	-0.0517084	-0.401207	2.63054	0.00296581	O60216	O60216	RAD21_HUMAN	Double-strand-break repair protein rad21 homolog	C (6)		3282	328
SMC3	C1	-0.6832	-1.06519	-2.06551	-0.594037	-0.328137	-0.84379	0.154872	0.708106	0.172296	0.390669	0.553415	0.924035	-0.441325	-1.27147	1.54511	0.84189	0.233078	1.76919	-	-	-	HALLMARK_E2F_TARGETS;HALLMARK_MITOTIC_SPINDLE	Cohesin Loading onto Chromatin;Establishment of Sister Chromatid Cohesion;Meiotic synapsis;Resolution of Sister Chromatid Cohesion;Separation of Sister Chromatids;SUMOylation of DNA damage response and repair proteins	WP_CELL_CYCLE;WP_COHESIN_COMPLEX_CORNELIA_DE_LANGE_SYNDROME;WP_DNA_IRDOUBLE_STRAND_BREAKS_AND_CELLULAR_RESPONSE_VIA_ATM;WP_MECP2_AND_ASSOCIATED_RETT_SYNDROME;WP_PRION_DISEASE_PATHWAY;WP_REGULATION_OF_SISTER_CHROMATID_SEPARATION_AT_THE_METAPHASEANAPHASE_TRANSITION;WP_RETINOBLASTOMA_GENE_IN_CANCER;WP_SMC1SMC3_ROLE_IN_DNA_DAMAGE_CORNELIA_DE_LANGE_SYNDROME	-	-	-	+	0.0265742	0.961693	-0.00813087	-0.0763519	1.99572	0.0177337	Q9UQE7	Q9UQE7	SMC3_HUMAN	Structural maintenance of chromosomes protein 3	C (6)		3283	4466
RBBP7	C1	-0.0931737	-0.720272	-0.985458	-0.708658	-1.33645	-1.70542	-0.493909	-0.443621	0.97396	0.607635	0.532718	0.352404	-0.105546	-0.478998	1.94764	0.39887	0.293912	1.96437	Secretory_1	-	-	HALLMARK_E2F_TARGETS	Activation of anterior HOX genes in hindbrain development during early embryogenesis;Deposition of new CENPA-containing nucleosomes at the centromere;ERCC6 (CSB) and EHMT2 (G9a) positively regulate rRNA expression;HATs acetylate histones;HDACs deacetylate histones;Neddylation;Oxidative Stress Induced Senescence;PKMTs methylate histone lysines;PRC2 methylates histones and DNA;Regulation of PTEN ge…	WP_EFFECT_OF_PROGERIN_ON_GENES_INVOLVED_IN_HUTCHINSONGILFORD_PROGERIA_SYNDROME;WP_INTERACTOME_OF_POLYCOMB_REPRESSIVE_COMPLEX_2_PRC2;WP_RETINOBLASTOMA_GENE_IN_CANCER	-	-	-	+	0.379642	0.527821	0.228121	0.846232	2.15074	0.00248575	Q16576	Q16576	RBBP7_HUMAN	Histone-binding protein RBBP7	C (6)	+	3284	2127
RBM3	C1	-0.100126	-1.09438	-1.15961	-0.533465	-0.977886	-1.43605	-0.80479	0.167819	0.360125	0.358342	0.207363	0.0555338	0.169025	-0.141958	2.25393	-0.000720736	0.486132	2.19071	Secretory_1;Unclassified_3	-	-	-	-	-	-	-	-	+	0.843699	0.216545	0.784531	1.58823	2.37462	0.00071177	P98179	P98179	RBM3_HUMAN	RNA-binding protein 3	C (6)	+	3285	1667
NUCKS1	C1	-0.174722	-0.198327	-1.36053	-0.573815	-0.788002	-1.00948	0.976408	-0.0525621	1.18986	1.09004	0.510011	0.00835687	-0.707477	-1.37311	2.21539	-0.70476	-0.246534	1.19925	-	-	-	-	-	-	-	-	-	+	0.426014	0.482371	-0.266821	-0.928612	1.17322	0.0273032	Q9H1E3	Q9H1E3	NUCKS_HUMAN	Nuclear ubiquitous casein and cyclin-dependent kinase substrate 1	C (6)		3286	3816
PMVK	C1	-1.00192	-0.474729	-1.26387	-0.755941	-1.29623	-0.912307	0.614405	-0.476976	0.607676	0.564223	0.975381	0.390674	0.143247	-0.612653	1.89327	-0.722827	0.304357	2.02421	-	-	-	HALLMARK_CHOLESTEROL_HOMEOSTASIS	Activation of gene expression by SREBF (SREBP);Cholesterol biosynthesis	WP_CHOLESTEROL_BIOSYNTHESIS_PATHWAY;WP_CHOLESTEROL_METABOLISM;WP_CHOLESTEROL_METABOLISM_WITH_BLOCH_AND_KANDUTSCHRUSSELL_PATHWAYS;WP_CHOLESTEROL_SYNTHESIS_DISORDERS;WP_MEVALONATE_ARM_OF_CHOLESTEROL_BIOSYNTHESIS_PATHWAY;WP_MEVALONATE_PATHWAY	-	-	-	+	0.0394332	0.943779	0.0352701	0.11179	2.12525	0.00232626	Q15126	Q15126	PMVK_HUMAN	Phosphomevalonate kinase	C (6)		3287	2041
MBD2	C1	-0.722531	-1.16491	-0.808352	-0.655719	-1.00842	-1.11919	0.616056	0.468603	0.364729	-0.133106	0.630317	-0.255893	0.97665	0.471687	1.20652	-1.73989	0.817138	2.05631	-	-	-	-	NoRC negatively regulates rRNA expression;RNA Polymerase I Promoter Opening	WP_EFFECT_OF_PROGERIN_ON_GENES_INVOLVED_IN_HUTCHINSONGILFORD_PROGERIA_SYNDROME	-	-	-	+	0.271346	0.641727	0.101631	0.641908	2.02552	0.00920719	Q9UBB5	Q9UBB5	MBD2_HUMAN	Methyl-CpG-binding domain protein 2	C (6)		3288	4264
MUC1	C1	-0.425694	-0.613463	-0.180478	-0.429771	-1.00282	-1.27565	0.205062	0.163685	-0.821227	-0.0255262	1.06989	0.28984	0.353167	-0.98718	1.69546	-1.14345	0.713866	2.41428	Secretory_2	-	-	HALLMARK_ESTROGEN_RESPONSE_EARLY;HALLMARK_IL2_STAT5_SIGNALING	Dectin-2 family;Defective C1GALT1C1 causes Tn polyagglutination syndrome (TNPS);Defective GALNT12 causes colorectal cancer 1 (CRCS1);Defective GALNT3 causes familial hyperphosphatemic tumoral calcinosis (HFTC);Interleukin-4 and 13 signaling;O-linked glycosylation of mucins;Termination of O-glycan biosynthesis	WP_ALTERED_GLYCOSYLATION_OF_MUC1_IN_TUMOR_MICROENVIRONMENT;WP_HEMATOPOIETIC_STEM_CELL_DIFFERENTIATION	-	-	-	+	0.236792	0.681768	0.199101	0.572376	0.936386	0.0457035	P15941	P15941	MUC1_HUMAN	Mucin-1	C (6)		3289	870
RAB5A	C1	-0.67417	-0.723907	-0.492937	-1.16927	-0.0158274	-1.00587	0.315264	0.461293	-0.881571	-0.584575	-0.0485729	0.419842	0.875072	0.122259	2.17949	-0.809531	-0.313298	2.34631	-	-	-	HALLMARK_PROTEIN_SECRETION	Clathrin-mediated endocytosis;Factors involved in megakaryocyte development and platelet production;RAB GEFs exchange GTP for GDP on RABs;RAB geranylgeranylation;Synthesis of PIPs at the plasma membrane;TBC/RABGAPs	WP_16P112_DISTAL_DELETION_SYNDROME;WP_AMYOTROPHIC_LATERAL_SCLEROSIS_ALS;WP_EBOLA_VIRUS_INFECTION_IN_HOST;WP_EGFEGFR_SIGNALING_PATHWAY;WP_INHIBITION_OF_EXOSOME_BIOGENESIS_AND_SECRETION_BY_MANUMYCIN_A_IN_CRPC_CELLS;WP_RAS_SIGNALING;WP_VASOPRESSINREGULATED_WATER_REABSORPTION;WP_VEGFAVEGFR2_SIGNALING	-	-	-	+	0.685598	0.295811	0.213237	1.3517	1.42417	0.0320641	P20339	P20339	RAB5A_HUMAN	Ras-related protein Rab-5A	C (6)		3290	944
TIPRL	C1	-0.288857	-1.1747	-0.886082	-0.586427	-0.742909	-0.621105	0.0694002	-0.351032	-0.174517	-0.163852	-0.0537913	0.166833	0.151097	0.084223	2.06295	-0.429063	-0.025848	2.96368	-	-	-	-	-	WP_CILIARY_LANDSCAPE	-	-	-	+	0.829625	0.222627	0.327477	1.56763	1.72052	0.0108428	O75663	O75663	TIPRL_HUMAN	TIP41-like protein	C (6)		3291	441
MTA1	C1	-0.0639915	-0.937968	-1.29523	-0.14761	-1.11723	-1.95215	0.042239	-0.0847391	0.801806	0.414105	0.827728	0.392916	-0.444434	0.136876	2.50023	-0.207222	1.08729	0.0473782	-	-	-	HALLMARK_UV_RESPONSE_DN	ERCC6 (CSB) and EHMT2 (G9a) positively regulate rRNA expression;HDACs deacetylate histones;Regulation of PTEN gene transcription;RNA Polymerase I Transcription Initiation;SUMOylation of transcription factors	WP_CIRCADIAN_RHYTHM_GENES;WP_EFFECT_OF_PROGERIN_ON_GENES_INVOLVED_IN_HUTCHINSONGILFORD_PROGERIA_SYNDROME	-	-	-	+	0.0946202	0.86589	0.0525471	0.254549	1.9457	0.00541763	Q13330	Q13330	MTA1_HUMAN	Metastasis-associated protein MTA1	C (6)		3292	1870
PSIP1	C1	-0.282381	-1.15756	-1.72012	-0.387447	-0.536041	-0.728547	0.393134	0.0803187	0.234891	0.519267	0.0867757	0.392002	-0.852391	-0.470022	2.78904	0.00530279	1.50441	0.12937	-	-	-	HALLMARK_E2F_TARGETS	2-LTR circle formation;APOBEC3G mediated resistance to HIV-1 infection;Autointegration results in viral DNA circles;Integration of provirus;Integration of viral DNA into host genomic DNA;Vpr-mediated nuclear import of PICs	WP_MECP2_AND_ASSOCIATED_RETT_SYNDROME	-	-	-	+	0.162267	0.774091	0.0865963	0.413132	1.40381	0.0213307	O75475	O75475	PSIP1_HUMAN	PC4 and SFRS1-interacting protein	C (6)		3293	423
PTPN11	C1	-0.188946	-1.2462	-1.30238	-0.87176	-0.853406	-1.50029	0.878715	0.0785688	0.240485	1.01921	0.285805	0.619992	0.0647711	-0.376356	2.52893	0.636236	0.580135	-0.593508	-	-	-	HALLMARK_IL6_JAK_STAT3_SIGNALING;HALLMARK_PI3K_AKT_MTOR_SIGNALING	Activation of IRF3/IRF7 mediated by TBK1/IKK epsilon;Constitutive Signaling by Aberrant PI3K in Cancer;Costimulation by the CD28 family;CTLA4 inhibitory signaling;Downstream signal transduction;FRS-mediated FGFR1 signaling;FRS-mediated FGFR2 signaling;FRS-mediated FGFR3 signaling;FRS-mediated FGFR4 signaling;GAB1 signalosome;GPVI-mediated activation cascade;Interferon alpha/beta signaling;Interle…	WP_ALPHA_6_BETA_4_SIGNALING_PATHWAY;WP_ANGIOTENSIN_II_RECEPTOR_TYPE_1_PATHWAY;WP_B_CELL_RECEPTOR_SIGNALING_PATHWAY;WP_BRAINDERIVED_NEUROTROPHIC_FACTOR_BDNF_SIGNALING_PATHWAY;WP_CANCER_IMMUNOTHERAPY_BY_CTLA4_BLOCKADE;WP_CANCER_IMMUNOTHERAPY_BY_PD1_BLOCKADE;WP_EGFEGFR_SIGNALING_PATHWAY;WP_EMBRYONIC_STEM_CELL_PLURIPOTENCY_PATHWAYS;WP_FRAGILE_X_SYNDROME;WP_GASTRIN_SIGNALING_PATHWAY;WP_HEART_DEVELOPME…	-	-	-	+	0.0341891	0.951622	-0.0120761	-0.0974488	2.4131	0.00628036	Q06124	Q06124	PTN11_HUMAN	Tyrosine-protein phosphatase non-receptor type 11	C (6)		3294	1755
RBM10	C1	-0.119645	-1.57148	-1.99957	-0.475574	-0.685531	-0.732307	-0.0994927	-0.121884	1.25016	0.447957	0.759421	0.455516	-0.408998	-0.200908	2.46676	0.155147	0.37396	0.506464	-	-	-	-	-	-	-	-	-	+	0.0246195	0.963661	0.00830746	0.070883	1.99957	0.0129984	P98175	P52756;P98175	RBM10_HUMAN	RNA-binding protein 10	C (6)		3295	1666
AKT1	C1	-0.062375	-1.23605	-1.07519	-1.00506	-1.06844	-0.466691	-0.213181	-0.264175	1.03054	0.132212	-0.0668961	0.0999295	0.0976144	0.187853	3.19069	-0.230542	0.51987	0.429895	-	-	-	HALLMARK_ALLOGRAFT_REJECTION;HALLMARK_ANDROGEN_RESPONSE;HALLMARK_PI3K_AKT_MTOR_SIGNALING	Activation of BAD and translocation to mitochondria;AKT phosphorylates targets in the cytosol;AKT phosphorylates targets in the nucleus;AKT-mediated inactivation of FOXO1A;Butyrate Response Factor 1 (BRF1) binds and destabilizes mRNA;CD28 dependent PI3K/Akt signaling;Constitutive Signaling by AKT1 E17K in Cancer;CTLA4 inhibitory signaling;Cyclin E associated events during G1/S transition;Deactiva…	WP_3Q29_COPY_NUMBER_VARIATION_SYNDROME;WP_4HYDROXYTAMOXIFEN_DEXAMETHASONE_AND_RETINOIC_ACIDS_REGULATION_OF_P27_EXPRESSION;WP_ACUTE_VIRAL_MYOCARDITIS;WP_AGERAGE_PATHWAY;WP_ALPHA_6_BETA_4_SIGNALING_PATHWAY;WP_ALZHEIMERS_DISEASE;WP_ALZHEIMERS_DISEASE_AND_MIRNA_EFFECTS;WP_AMPACTIVATED_PROTEIN_KINASE_SIGNALING;WP_ANDROGEN_RECEPTOR_SIGNALING_PATHWAY;WP_ANGIOGENESIS;WP_ANGIOPOIETINLIKE_PROTEIN_8_REGULAT…	-	-	-	+	0.504493	0.417978	0.288846	1.06255	1.74267	0.00684545	P31749	P31749	AKT1_HUMAN	RAC-alpha serine/threonine-protein kinase	C (6)		3296	1115
CALU	C1	-0.00212657	-1.07343	-1.50799	-1.22831	-0.685392	-1.13174	0.839852	-0.280046	0.468529	0.333286	0.52214	-0.601039	-0.4798	0.822465	2.59747	0.303027	0.225651	0.877446	-	-	-	HALLMARK_EPITHELIAL_MESENCHYMAL_TRANSITION	Platelet degranulation;Post-translational protein phosphorylation;Regulation of Insulin-like Growth Factor (IGF) transport and uptake by Insulin-like Growth Factor Binding Proteins (IGFBPs)	WP_NOTCH1_REGULATION_OF_ENDOTHELIAL_CELL_CALCIFICATION;WP_VEGFAVEGFR2_SIGNALING	-	-	-	+	0.506133	0.416877	0.317858	1.06528	2.33663	0.00142326	O43852	O43852	CALU_HUMAN	Calumenin	C (6)		3297	321
GPR89A;GPR89B	C1	-0.549042	-0.0843075	-1.64351	-0.644161	-0.677561	-1.12462	0.945744	-0.0107399	-0.214856	-0.00921041	-0.23668	-0.29985	-0.0232382	0.333744	3.02578	-0.105028	0.102653	1.21489	-	-	-	-	-	-	-	-	-	+	0.702766	0.286194	0.251842	1.37798	1.7848	0.0106048	B7ZAQ6;P0CG08	P0CG08;B7ZAQ6	GPHRA_HUMAN;GPHRB_HUMAN	Golgi pH regulator A	C (6)		3298	59
MIS12	C1	-1.13345	-0.308402	-0.37143	-0.832494	-1.37119	-2.25865	0.132946	-0.0199797	0.289202	0.324708	0.627132	0.500517	0.380591	0.290542	2.10324	1.1925	-0.396763	0.850978	-	-	-	-	Amplification of signal from unattached kinetochores via a MAD2 inhibitory signal;Mitotic Prometaphase;Resolution of Sister Chromatid Cohesion;RHO GTPases Activate Formins;Separation of Sister Chromatids	-	-	-	-	+	0.573087	0.367169	0.252747	1.17491	3.07922	0.000324146	Q9H081	Q9H081	MIS12_HUMAN	Protein MIS12 homolog	C (6)		3299	3782
MED24	C1	0.165064	-0.712299	-0.272021	-0.407941	-2.49941	-1.73152	-0.456652	-0.0364444	0.762072	0.307262	0.780546	0.423912	-0.341235	-0.0779373	1.62494	0.887236	0.291995	1.29243	Secretory_1;Secretory_2	-	-	HALLMARK_ESTROGEN_RESPONSE_EARLY;HALLMARK_GLYCOLYSIS	Generic Transcription Pathway;PPARA activates gene expression;Transcriptional regulation of white adipocyte differentiation	-	-	-	-	+	0.379037	0.528336	0.113484	0.845139	1.98145	0.00679893	O75448	O75448	MED24_HUMAN	Mediator of RNA polymerase II transcription subunit 24	C (6)	+	3300	421
POLR2J;POLR2J2;POLR2J3	C1	0.124774	-1.39602	-1.01377	-0.635256	-1.65692	-1.59392	0.863884	-0.397421	1.02852	0.923736	0.111597	1.11647	-0.198599	0.999233	1.49176	0.498217	-0.723507	0.457234	-	-	-	HALLMARK_DNA_REPAIR	Abortive elongation of HIV-1 transcript in the absence of Tat;Activation of anterior HOX genes in hindbrain development during early embryogenesis;Dual incision in TC-NER;FGFR2 alternative splicing;Formation of HIV elongation complex in the absence of HIV Tat;Formation of HIV-1 elongation complex containing HIV-1 Tat;Formation of RNA Pol II elongation complex;Formation of TC-NER Pre-Incision Comp…	WP_EUKARYOTIC_TRANSCRIPTION_INITIATION;WP_PYRIMIDINE_METABOLISM	-	-	-	+	0.181881	0.748858	-0.0473499	-0.456424	2.72044	0.00406332	P52435;Q9GZM3;Q9H1A7	Q9GZM3;Q9H1A7;P52435	RPB11_HUMAN;RPB1B_HUMAN;RPB1C_HUMAN	DNA-directed RNA polymerase II subunit RPB11-a	C (6)		3301	1405
MRI1	C1	-0.837251	-0.0181816	-0.979386	-1.16576	-0.840319	-0.937277	-0.652694	-0.343827	-0.0917226	0.482115	-0.184089	0.426798	0.03576	2.01929	2.61877	0.166467	-0.28804	0.589347	-	-	-	-	Methionine salvage pathway	WP_METHIONINE_DE_NOVO_AND_SALVAGE_PATHWAY	-	-	-	+	0.977269	0.163201	0.51997	1.78031	2.15704	0.0023348	Q9BV20	Q9BV20	MTNA_HUMAN	Methylthioribose-1-phosphate isomerase	C (6)		3302	3666
RAB8A	C1	-0.75451	0.183262	-0.829755	-1.20808	-0.586298	-1.21141	0.0975248	0.0213781	-0.367106	0.133105	-0.0133958	-0.0785498	-0.0665559	1.15462	3.24261	0.257454	-0.405722	0.431427	-	-	-	-	Anchoring of the basal body to the plasma membrane;RAB GEFs exchange GTP for GDP on RABs;RAB geranylgeranylation;Regulation of PLK1 Activity at G2/M Transition;TBC/RABGAPs;Translocation of GLUT4 to the plasma membrane;VxPx cargo-targeting to cilium	WP_CILIARY_LANDSCAPE;WP_FOCAL_ADHESION_PI3KAKTMTORSIGNALING_PATHWAY;WP_JOUBERT_SYNDROME	-	-	-	+	0.768096	0.25167	0.192876	1.47658	1.66121	0.0250507	P61006	Q92930;P61006	RAB8A_HUMAN	Ras-related protein Rab-8A	C (6)		3303	1519
CRIP2	C1	-0.957511	-0.424989	-1.11227	-0.778471	-0.29017	-0.570693	-0.0577862	-0.0117068	0.20802	0.468579	0.472957	-0.00884176	-0.645599	1.14431	3.34093	-0.387692	-0.345214	-0.0438447	-	-	-	HALLMARK_COAGULATION	-	WP_VEGFAVEGFR2_SIGNALING	-	-	-	+	0.214974	0.709187	0.222754	0.527167	1.02856	0.0301838	P52943	P52943	CRIP2_HUMAN	Cysteine-rich protein 2	C (6)		3304	1418
SARS2	C1	-0.865484	0.0827508	-0.256581	-1.18818	-0.86076	-1.27523	-0.234443	0.457743	-0.193989	0.0349178	-0.362874	0.107026	-0.707458	1.60936	2.88458	0.0905074	0.728577	-0.0504639	-	-	-	-	Mitochondrial tRNA aminoacylation	-	-	-	-	+	0.750089	0.260949	0.432165	1.44962	1.61242	0.00827555	Q9NP81	Q9NP81	SYSM_HUMAN	Serine--tRNA ligase, mitochondrial	C (6)		3305	3998
PRAF2	C1	-1.60516	-0.539759	-0.377422	-0.242707	-0.514006	-1.31099	-0.290248	0.260852	0.163806	-0.148877	0.222847	-0.270395	-0.958733	1.41114	2.74635	0.275654	1.03687	0.14078	-	-	-	HALLMARK_IL2_STAT5_SIGNALING	-	-	-	-	-	+	0.77716	0.246993	0.475299	1.4901	1.76736	0.00516898	O60831	O60831	PRAF2_HUMAN	PRA1 family protein 2	C (6)		3306	368
TRIM47	C1	-0.776892	-0.55077	0.0524976	-0.213857	-1.27087	-1.60222	-0.554416	0.538237	-0.16964	-0.870189	-0.35797	0.327302	0.68744	0.0262991	2.85098	0.0848718	0.807693	0.991502	-	-	-	-	-	-	-	-	-	+	1.35545	0.0751117	0.686627	2.3019	2.18811	0.00193219	Q96LD4	Q96LD4	TRI47_HUMAN	E3 ubiquitin-protein ligase TRIM47	C (6)		3307	3409
BASP1	C1	-1.8526	-0.485296	0.0760791	-0.57515	-1.03375	-0.822728	-0.0426453	0.690302	-0.273029	0.365314	-0.408064	-0.335737	1.41602	0.745691	2.59589	-0.798358	0.56287	0.175199	-	-	-	HALLMARK_EPITHELIAL_MESENCHYMAL_TRANSITION	-	-	-	-	-	+	0.824092	0.225158	0.879479	1.5595	1.84403	0.00238224	P80723	P80723	BASP1_HUMAN	Brain acid soluble protein 1	C (6)		3308	1646
RDX	C1	-0.273958	0.171705	-0.727487	-0.20629	-0.117733	-0.592345	-0.989246	-0.534982	-1.36506	0.536915	-0.897407	-0.214143	-0.00114879	1.29786	2.75469	1.07816	-0.751237	0.831704	-	+	STIC_Epithelium PAX8 pos	-	Recycling pathway of L1	WP_PTDINS45P2_IN_CYTOKINESIS_PATHWAY;WP_REGULATION_OF_ACTIN_CYTOSKELETON	-	-	-	+	1.56037	0.0495877	0.480716	2.57783	1.73881	0.0123305	P35241	P35241	RADI_HUMAN	Radixin	C (6)		3309	1155
PNP	C1	-0.27928	-0.0850486	-0.354837	-0.218206	-0.288599	-0.284003	-0.161851	-0.481124	-0.404408	0.270127	-1.19399	-1.24006	0.125916	1.55313	3.05943	0.633163	-0.924836	0.274471	-	-	-	HALLMARK_DNA_REPAIR;HALLMARK_IL2_STAT5_SIGNALING;HALLMARK_INTERFERON_GAMMA_RESPONSE;HALLMARK_MTORC1_SIGNALING	Neutrophil degranulation;Purine catabolism;Purine salvage	WP_PURINE_METABOLISM;WP_PURINE_METABOLISM_AND_RELATED_DISORDERS;WP_VEGFAVEGFR2_SIGNALING	+	Disease variant, FDA approved drug targets	14	+	1.25776	0.0921058	1.62219	2.16927	1.36325	0.0080381	P00491	P00491	PNPH_HUMAN	Purine nucleoside phosphorylase	C (6)		3310	616
PARP2	C1	-0.409668	-0.515473	-0.42378	0.290445	-0.192824	-0.857692	-0.777288	-0.336793	-0.485408	-0.354653	-0.272063	-0.354381	-0.721144	-0.110138	3.46141	0.898362	0.222488	0.938595	-	-	-	HALLMARK_SPERMATOGENESIS;HALLMARK_UV_RESPONSE_UP	DNA Damage Recognition in GG-NER;Dual Incision in GG-NER;Formation of Incision Complex in GG-NER;HDR through MMEJ (alt-NHEJ);POLB-Dependent Long Patch Base Excision Repair	WP_BASE_EXCISION_REPAIR;WP_DNA_REPAIR_PATHWAYS_FULL_NETWORK;WP_NAD_BIOSYNTHETIC_PATHWAYS;WP_NETWORK_MAP_OF_SARSCOV2_SIGNALING_PATHWAY;WP_PEROXIREDOXIN_2_INDUCED_OVARIAN_FAILURE	+	FDA approved drug targets	14	+	1.15159	0.114447	0.899389	2.02376	1.27783	0.0140359	Q9UGN5	Q9UGN5	PARP2_HUMAN	Poly [ADP-ribose] polymerase 2	C (6)		3311	4303
GPKOW	C1	-0.205745	-0.642028	-0.812333	0.206929	0.387064	-0.51729	-0.389713	-0.115536	-0.83661	-0.592734	-1.21154	-0.486213	0.233849	0.102964	3.34372	0.457008	0.0549741	1.02323	-	+	STIC_Epithelium PAX8 pos	-	mRNA Splicing - Major Pathway	-	-	-	-	+	1.68097	0.0394392	0.567942	2.73962	1.77788	0.00912968	Q92917	Q92917	GPKOW_HUMAN	G-patch domain and KOW motifs-containing protein	C (6)		3312	3186
MFGE8	C1	-1.32722	0.156202	-0.721338	-0.222555	-0.0739931	-0.813685	0.691882	-1.18857	-1.19976	-0.224923	-0.452903	-0.53558	0.643312	0.890353	2.66658	-0.0768714	1.19437	0.59469	Unclassified _1	+	STIC_Epithelium PAX8 pos	-	Amyloid fiber formation;Post-translational protein phosphorylation;Regulation of Insulin-like Growth Factor (IGF) transport and uptake by Insulin-like Growth Factor Binding Proteins (IGFBPs)	WP_COMPLEMENT_SYSTEM_IN_NEURONAL_DEVELOPMENT_AND_PLASTICITY;WP_EBOLA_VIRUS_INFECTION_IN_HOST;WP_EXTRACELLULAR_VESICLEMEDIATED_SIGNALING_IN_RECIPIENT_CELLS;WP_EXTRAFOLLICULAR_AND_FOLLICULAR_B_CELL_ACTIVATION_BY_SARSCOV2;WP_GLUCOCORTICOID_RECEPTOR_PATHWAY;WP_NUCLEAR_RECEPTORS_METAPATHWAY	-	-	-	+	1.95052	0.0232409	1.236	3.10229	2.35099	0.000908136	Q08431	Q08431	MFGM_HUMAN	Lactadherin	C (6)		3313	1784
TAGLN	C1	-1.52616	-0.509108	-0.00502237	-0.146832	0.358881	-0.346086	0.160716	-1.20695	-0.969567	-0.137897	-0.798571	-0.93543	1.3621	1.11046	2.59707	0.242824	0.458467	0.29111	Unclassified _1	+	STIC_Epithelium PAX8 pos	HALLMARK_EPITHELIAL_MESENCHYMAL_TRANSITION;HALLMARK_MYOGENESIS	-	WP_BURN_WOUND_HEALING	-	-	-	+	2.50999	0.00858919	1.65477	3.87372	2.63588	0.000401261	Q01995	Q01995	TAGL_HUMAN	Transgelin	C (6)		3314	1708
SORT1	C1	-0.637668	0.12587	-0.595969	-0.566911	-0.804491	-0.142403	-0.266915	-0.938312	-0.958589	0.242476	-0.534391	-0.66319	1.59051	0.214248	2.77923	-0.684017	0.67805	1.16247	-	+	STIC_Epithelium PAX8 pos	-	Golgi Associated Vesicle Biogenesis	WP_BRAINDERIVED_NEUROTROPHIC_FACTOR_BDNF_SIGNALING_PATHWAY;WP_CHOLESTEROL_METABOLISM;WP_NEURAL_CREST_CELL_MIGRATION_IN_CANCER	-	-	-	+	1.75439	0.0340505	0.630421	2.83816	2.16663	0.00356633	Q99523	Q99523	SORT_HUMAN	Sortilin	C (6)		3315	3530
UTP23	C1	-1.43454	-0.811189	-0.302838	-0.643056	-1.09419	-0.415254	0.675755	0.911967	-1.28524	0.789412	-1.41187	1.40953	1.0552	1.19787	0.60462	-0.826507	0.690397	0.889938	-	-	-	-	-	-	-	-	-	+	0.315073	0.593949	0.297041	0.72667	1.43426	0.00975312	Q9BRU9	Q9BRU9	UTP23_HUMAN	rRNA-processing protein UTP23 homolog	C (6)		3316	3618
TTC17	C1	0.168819	-0.567755	-0.902197	-0.158343	-1.42834	-0.701589	0.0194056	0.330813	-1.3374	1.34594	-0.890456	0.572471	1.65666	0.933843	1.79969	-1.19128	0.410773	-0.0610543	-	-	-	-	-	-	-	-	-	+	0.442773	0.468101	0.320212	0.957757	0.936114	0.0460413	Q96AE7	Q96AE7	TTC17_HUMAN	Tetratricopeptide repeat protein 17	C (6)		3317	3239
ERGIC1	C1	-0.188335	-0.431759	-1.12213	-0.795984	-1.43654	-1.60107	1.54973	0.11288	0.322719	0.768648	0.28306	0.605179	1.68384	0.593992	-0.729307	-1.25034	1.02005	0.615369	-	-	-	-	-	-	-	-	-	+	0.236822	0.681842	-0.183983	-0.572439	2.07724	0.00233954	Q969X5	Q969X5	ERGI1_HUMAN	Endoplasmic reticulum-Golgi intermediate compartment protein 1	C (6)		3318	3224
TXNDC5	C1	-0.663141	-1.12758	-0.67111	-0.794034	-1.56021	-1.43427	1.45934	0.273761	0.450521	0.515172	0.0684748	-0.236383	2.12069	0.623828	0.354782	-0.619841	1.25937	-0.0193689	-	-	-	-	Golgi Associated Vesicle Biogenesis;Lysosome Vesicle Biogenesis;Neutrophil degranulation	WP_VEGFAVEGFR2_SIGNALING	-	-	-	+	0.170215	0.765202	0.0943025	0.430804	2.8368	0.00078442	Q8NBS9	Q8NBS9	TXND5_HUMAN	Thioredoxin domain-containing protein 5	C (6)		3319	2922
RRBP1	C1	-0.76037	-0.78419	-0.893362	-0.405814	-1.04209	-1.37824	2.76046	0.947345	-0.445917	0.264823	0.241003	0.239124	1.32848	0.257888	0.364727	-0.975668	0.16014	0.121665	-	-	-	-	-	WP_ECTODERM_DIFFERENTIATION	-	-	-	+	0.376443	0.531666	-0.142305	-0.840449	1.91526	0.00990255	Q9P2E9	Q9P2E9	RRBP1_HUMAN	Ribosome-binding protein 1	C (6)		3320	4246
PADI2	C1	-0.328965	0.473133	0.552527	-1.26662	-1.73169	-1.8278	0.634775	1.19455	0.801269	0.429816	0.809972	0.697604	0.834619	0.204314	0.646322	-1.69922	-0.705149	0.280535	-	-	-	-	Chromatin modifying enzymes;Neutrophil degranulation	-	-	-	-	+	1.17995	0.107877	-0.829645	-2.0628	1.5238	0.0059774	Q9Y2J8	Q9Y2J8	PADI2_HUMAN	Protein-arginine deiminase type-2	C (6)		3321	4496
HS2ST1	C1	0.41845	0.0176718	0.452428	-2.98286	-0.5137	-1.38559	0.789117	0.748946	-0.233105	0.728302	0.447399	0.736446	0.416792	0.45286	1.09111	-1.20571	-0.0368848	0.058328	-	-	-	HALLMARK_GLYCOLYSIS	HS-GAG biosynthesis	WP_METAPATHWAY_BIOTRANSFORMATION_PHASE_I_AND_II	-	-	-	+	0.561494	0.376018	-0.2119	-1.15619	0.997268	0.0405367	Q7LGA3	Q7LGA3	HS2ST_HUMAN	Heparan sulfate 2-O-sulfotransferase 1	C (6)		3322	2603
FAF2	C1	-0.410768	-0.947904	-0.708543	-0.933547	-0.798112	-1.33819	1.07461	1.03533	0.0925662	0.524293	0.60644	0.733172	0.72535	0.685475	1.40336	-2.35822	0.292579	0.322119	-	-	-	-	Neutrophil degranulation	-	-	-	-	+	0.411085	0.496381	-0.182439	-0.902378	1.84281	0.00869595	Q96CS3	Q96CS3	FAF2_HUMAN	FAS-associated factor 2	C (6)		3323	3282
RARS1	C1	-0.705902	-0.811028	-0.988952	-0.244703	-1.0985	-0.679261	0.897013	0.509703	0.424949	0.792349	0.646883	1.0179	0.747768	1.24224	-0.119018	-2.58665	-0.0454035	1.00061	-	-	-	HALLMARK_ALLOGRAFT_REJECTION;HALLMARK_GLYCOLYSIS	Cytosolic tRNA aminoacylation;SeMet incorporation into proteins	-	-	-	-	+	0.567104	0.371787	-0.130796	-1.16527	1.56723	0.0439178	P54136	P54136	SYRC_HUMAN	Arginine--tRNA ligase, cytoplasmic	C (6)		3324	1437
GNB1L	C1	-1.4734	-0.805544	0.107137	-1.04775	-1.33321	-1.11345	1.11234	0.390644	1.02266	0.693056	0.492779	0.352156	0.955925	1.18312	0.175337	-1.90555	0.393306	0.800437	-	-	-	-	-	WP_22Q112_COPY_NUMBER_VARIATION_SYNDROME	-	-	-	+	0.385574	0.522481	-0.301534	-0.856922	2.26972	0.00132788	Q9BYB4	Q9BYB4	GNB1L_HUMAN	Guanine nucleotide-binding protein subunit beta-like protein 1	C (6)		3325	3724
ILVBL	C1	-1.48492	-0.856519	-0.838084	-0.755169	-1.25083	-1.23548	0.208273	0.396739	0.460029	0.825589	0.0986848	0.868255	0.970628	1.18286	1.38886	-1.49088	0.436458	1.07551	-	-	-	HALLMARK_HYPOXIA	-	-	-	-	-	+	0.096166	0.863947	0.0282071	0.258356	3.05663	0.00283662	A1L0T0	A1L0T0	HACL2_HUMAN	2-hydroxyacyl-CoA lyase 2	C (6)		3326	10
RDH13	C1	-0.88021	-0.625022	-0.0724687	-1.34195	-0.411542	-0.712742	-0.086422	0.682924	-0.0368368	0.0495182	0.279435	0.916283	-0.477323	1.16317	1.79606	-2.2422	0.751603	1.24772	-	-	-	-	RA biosynthesis pathway	WP_RETINOL_METABOLISM	-	-	-	+	0.0404427	0.942062	0.040685	0.114534	0.899968	0.0499687	Q8NBN7	Q8NBN7	RDH13_HUMAN	Retinol dehydrogenase 13	C (6)		3327	2919
CLPTM1L	C1	-0.44501	-0.998939	-1.30506	-0.182069	-0.776227	-0.688091	-0.216114	0.329339	0.139458	0.294584	0.158098	0.600693	-0.0463283	0.0429606	0.601232	-1.66635	2.6074	1.55042	-	-	-	-	-	WP_VITAMIN_D_RECEPTOR_PATHWAY	-	-	-	+	0.196609	0.731166	0.104196	0.488247	1.16037	0.0401536	Q96KA5	Q96KA5	CLP1L_HUMAN	Lipid scramblase CLPTM1L	C (6)		3328	3398
PDCD6	C1	-0.505938	-0.808939	-1.03006	-0.823061	-0.603501	-0.905418	0.368872	0.209223	0.635302	0.80137	0.401537	0.536582	-0.849834	0.580609	0.0574466	-1.76979	1.38809	2.31751	-	-	-	-	-	WP_EPITHELIAL_TO_MESENCHYMAL_TRANSITION_IN_COLORECTAL_CANCER	-	-	-	+	0.128074	0.82074	-0.0806886	-0.334921	1.29993	0.0249597	O75340	O75340	PDCD6_HUMAN	Programmed cell death protein 6	C (6)		3329	402
MTDH	C1	-0.766242	-1.45656	-1.6791	0.0858868	-0.0443385	-0.981638	0.913074	0.977005	0.54594	0.507661	0.554349	0.55907	-0.643203	-0.513911	0.738321	-1.56235	1.53428	1.23176	-	-	-	-	-	WP_CCL18_SIGNALING_PATHWAY;WP_GASTRIC_CANCER_NETWORK_2;WP_NCRNAS_INVOLVED_IN_WNT_SIGNALING_IN_HEPATOCELLULAR_CARCINOMA	-	-	-	+	0.514855	0.409544	-0.102555	-1.07978	1.64905	0.0407847	Q86UE4	Q86UE4	LYRIC_HUMAN	Protein LYRIC	C (6)		3330	2664
PTBP1	C1	0.36314	-1.33281	-1.91992	-0.128839	-0.363029	-0.724836	-0.157883	0.627828	1.14075	0.659709	0.77439	0.580703	-0.550222	-0.24848	0.780411	-1.92849	1.20486	1.22272	-	-	-	-	FGFR2 alternative splicing;mRNA Splicing - Major Pathway;Processing of Capped Intron-Containing Pre-mRNA	WP_MIR124_PREDICTED_INTERACTIONS_WITH_CELL_CYCLE_AND_DIFFERENTIATION;WP_MRNA_PROCESSING	-	-	-	+	0.458305	0.455415	-0.173337	-0.984493	1.14525	0.0445124	P26599	P26599	PTBP1_HUMAN	Polypyrimidine tract-binding protein 1	C (6)		3331	1035
OGDHL	C1	-0.447274	-0.644616	-1.42496	-0.341461	-0.729119	-1.18918	-0.421444	-0.198717	-0.551689	0.0778766	-0.00640319	0.594363	-0.0335228	2.36996	0.726192	-0.658182	0.851563	2.02661	-	-	-	-	-	-	-	-	-	+	1.07461	0.134714	0.655836	1.91708	2.25633	0.00151299	Q9ULD0	Q9ULD0	OGDHL_HUMAN	2-oxoglutarate dehydrogenase-like, mitochondrial	C (6)		3332	4393
STX6	C1	-0.983729	-0.608776	-0.837742	-0.120956	-0.616942	-1.02515	0.0146968	-0.546741	-1.09222	0.285954	0.200075	0.0597619	0.187325	2.86512	-0.00357323	0.183749	0.142248	1.8969	-	-	-	-	Intra-Golgi traffic;Retrograde transport at the Trans-Golgi-Network	-	-	-	-	+	1.11033	0.125143	0.416884	1.96672	1.98455	0.00584955	O43752	O43752	STX6_HUMAN	Syntaxin-6	C (6)		3333	308
EEPD1	C1	-0.322555	-0.283482	-0.153507	0.26346	-2.15043	-1.4818	0.601567	-0.648593	0.0107489	0.657175	-0.242294	-0.376513	-0.150991	2.39568	1.12454	-0.611765	0.410692	0.958072	-	-	-	-	-	-	-	-	-	+	0.728059	0.271831	0.351358	1.41641	1.32398	0.0175363	Q7L9B9	Q7L9B9	EEPD1_HUMAN	Endonuclease/exonuclease/phosphatase family domain-containing protein 1	C (6)		3334	2600
ALDH7A1	C1	-0.109418	-0.334339	-1.39315	-1.41125	-0.679615	-0.76341	0.863333	0.784049	0.769656	0.575568	0.00249684	0.320191	-0.00659757	2.4021	0.275354	-1.87065	0.318057	0.257621	-	-	-	HALLMARK_GLYCOLYSIS	Choline catabolism;Lysine catabolism	WP_AMINO_ACID_METABOLISM;WP_CEREBRAL_ORGANIC_ACIDURIAS_INCLUDING_DISEASES;WP_MTHFR_DEFICIENCY;WP_VITAMIN_B6DEPENDENT_AND_RESPONSIVE_DISORDERS	-	-	-	+	0.234141	0.685144	-0.199916	-0.566941	1.36367	0.0131013	P49419	P49419	AL7A1_HUMAN	Alpha-aminoadipic semialdehyde dehydrogenase	C (6)		3335	1318
ALDH4A1	C1	-0.624071	-0.347315	-0.965559	-0.938945	-1.14751	-0.705822	1.06828	0.23429	0.100586	0.143767	-0.0554952	-0.0210815	-1.02313	2.71982	1.09178	-0.969819	0.628636	0.811593	-	-	-	-	Glyoxylate metabolism and glycine degradation;Proline catabolism	WP_22Q112_COPY_NUMBER_VARIATION_SYNDROME;WP_GLYOXYLATE_METABOLISM;WP_P53_TRANSCRIPTIONAL_GENE_NETWORK;WP_UREA_CYCLE_AND_ASSOCIATED_PATHWAYS	-	-	-	+	0.201369	0.724755	0.270898	0.498413	1.37613	0.00934566	P30038	P30038	AL4A1_HUMAN	Delta-1-pyrroline-5-carboxylate dehydrogenase, mitochondrial	C (6)		3336	1085
CCDC124	C1	-0.395167	-1.52003	-1.492	-0.931054	-0.405974	-0.811422	0.186393	-0.0636055	0.558312	0.185367	0.474579	0.408057	0.565425	2.51993	0.755917	-0.976478	-0.304518	1.24627	-	-	-	-	-	WP_VEGFAVEGFR2_SIGNALING	-	-	-	+	0.289334	0.622219	0.115713	0.677186	2.09664	0.00613956	Q96CT7	Q96CT7	CC124_HUMAN	Coiled-coil domain-containing protein 124	C (6)		3337	3283
LSM14A	C1	-0.448109	-1.1355	-1.41165	-0.756042	-0.449026	-0.483732	0.352097	0.428888	0.376606	0.434067	0.0988854	-0.0530983	0.699221	3.05435	0.505677	-0.609146	-1.08669	0.483199	-	-	-	-	-	-	-	-	-	+	0.154943	0.784276	0.0889193	0.396683	1.31606	0.0252307	Q8ND56	Q8ND56	LS14A_HUMAN	Protein LSM14 homolog A	C (6)		3338	2936
COQ7	C1	-0.462025	-0.747889	-1.19063	-0.488368	-1.00768	-1.19125	-0.421957	0.925499	-0.0348031	0.0124625	0.782983	-0.255513	-0.896268	2.29792	1.43789	-0.114975	1.49594	-0.141342	-	-	-	-	Ubiquinol biosynthesis	WP_RIBOFLAVIN_AND_COQ_DISORDERS	-	-	-	+	0.42362	0.484722	0.223837	0.924423	1.81323	0.00704019	Q99807	Q99807	COQ7_HUMAN	5-demethoxyubiquinone hydroxylase, mitochondrial	C (6)		3339	3562
COQ5	C1	-0.0749326	-0.450677	-1.26902	-0.406887	-0.652489	-1.36982	-0.707006	0.434953	0.496517	0.0836435	0.471089	-0.0410971	-1.09006	2.5028	1.53132	-0.0882205	1.19348	-0.563585	-	-	-	HALLMARK_ADIPOGENESIS	Ubiquinol biosynthesis	-	-	-	-	+	0.338355	0.569404	0.156049	0.770495	1.15884	0.0416994	Q5HYK3	Q5HYK3	COQ5_HUMAN	2-methoxy-6-polyprenyl-1,4-benzoquinol methylase, mitochondrial	C (6)		3340	2269
AFG3L2	C1	-0.765265	0.338142	-0.867079	-0.627542	-1.44382	-1.48553	-0.715653	0.264319	-0.237186	-0.067049	0.143721	0.23331	-0.324124	2.52413	0.716228	0.994618	1.46469	-0.145915	-	-	-	HALLMARK_OXIDATIVE_PHOSPHORYLATION	Processing of SMDT1	WP_CILIARY_LANDSCAPE	-	-	-	+	1.16538	0.111169	0.436599	2.04276	2.25934	0.00255724	Q9Y4W6	Q9Y4W6	AFG32_HUMAN	AFG3-like protein 2	C (6)		3341	4583
AIFM1	C1	-0.459472	0.553421	-0.826657	-0.316151	-1.58481	-1.01702	-0.572844	0.533305	0.335903	0.168556	-0.0784549	-0.351166	0.577844	2.44684	0.930844	-1.53888	1.30507	-0.106333	-	-	-	HALLMARK_ADIPOGENESIS;HALLMARK_OXIDATIVE_PHOSPHORYLATION	-	WP_APOPTOSIS_MODULATION_AND_SIGNALING;WP_APOPTOSIS_MODULATION_BY_HSP70;WP_NANOMATERIAL_INDUCED_APOPTOSIS	-	-	-	+	0.487929	0.431039	0.278578	1.0348	0.975578	0.0472595	O95831	O95831	AIFM1_HUMAN	Apoptosis-inducing factor 1, mitochondrial	C (6)		3342	584
COQ9	C1	-0.0999623	-0.23557	-1.02612	-0.535953	-1.29368	-1.30725	-0.16813	1.04216	0.488708	-0.144352	0.406591	0.198162	0.00331158	2.81553	0.483111	-0.946501	1.03335	-0.713403	-	-	-	HALLMARK_ADIPOGENESIS	Ubiquinol biosynthesis	WP_RIBOFLAVIN_AND_COQ_DISORDERS	-	-	-	+	0.088948	0.872611	0.0445056	0.2405	1.16717	0.0453087	O75208	O75208	COQ9_HUMAN	Ubiquinone biosynthesis protein COQ9, mitochondrial	C (6)		3343	398
PDK1	C1	-0.497984	-0.242016	-0.582645	-0.098855	-2.34268	-0.869187	-0.295602	0.386359	0.111912	0.0783699	-0.15637	0.271823	0.286433	2.32297	0.24814	-0.488013	1.98853	-0.121185	-	-	-	HALLMARK_HYPOXIA;HALLMARK_MTORC1_SIGNALING;HALLMARK_PI3K_AKT_MTOR_SIGNALING	Regulation of pyruvate dehydrogenase (PDH) complex;Signaling by Retinoic Acid	WP_ASPIRIN_AND_MIRNAS;WP_DNA_DAMAGE_RESPONSE_ONLY_ATM_DEPENDENT;WP_EPO_RECEPTOR_SIGNALING;WP_FACTORS_AND_PATHWAYS_AFFECTING_INSULINLIKE_GROWTH_FACTOR_IGF1AKT_SIGNALING;WP_FRAGILE_X_SYNDROME;WP_GLUCOSE_METABOLISM_IN_TRIPLENEGATIVE_BREAST_CANCER_CELLS;WP_HEREDITARY_LEIOMYOMATOSIS_AND_RENAL_CELL_CARCINOMA_PATHWAY;WP_KISSPEPTINKISSPEPTIN_RECEPTOR_SYSTEM_IN_THE_OVARY;WP_MALIGNANT_PLEURAL_MESOTHELIOMA;…	+	FDA approved drug targets	2	+	0.663307	0.309526	0.566285	1.31732	1.59939	0.00536165	Q15118	Q15118	PDK1_HUMAN	[Pyruvate dehydrogenase (acetyl-transferring)] kinase isozyme 1, mitochondrial	C (6)		3344	2038
HSD17B10	C1	-0.879816	-0.0612517	-0.291534	-0.462493	-0.872945	-0.923426	0.557058	0.444267	-0.327479	-0.362562	-0.353361	-0.194121	1.07119	3.06824	-1.04594	-0.823393	0.68504	0.772523	-	-	-	HALLMARK_FATTY_ACID_METABOLISM;HALLMARK_OXIDATIVE_PHOSPHORYLATION	Branched-chain amino acid catabolism;rRNA processing in the mitochondrion;tRNA modification in the mitochondrion;tRNA processing in the mitochondrion	WP_ALZHEIMERS_DISEASE;WP_ALZHEIMERS_DISEASE_AND_MIRNA_EFFECTS;WP_ESTROGEN_METABOLISM_WP5276;WP_LEUCINE_ISOLEUCINE_AND_VALINE_METABOLISM;WP_MITOCHONDRIAL_BETAOXIDATION;WP_VALPROIC_ACID_PATHWAY	+	Disease variant, FDA approved drug targets, Mental retardation, Neurodegeneration	X	+	0.494178	0.425483	0.3684	1.0453	0.964473	0.0419567	Q99714	Q99714	HCD2_HUMAN	3-hydroxyacyl-CoA dehydrogenase type-2	C (6)		3345	3552
PYCR1	C1	-1.14682	-1.01083	-0.607808	-0.863481	-0.745202	-1.16835	0.381295	0.14794	0.424171	0.250141	-0.634011	0.132233	0.0878763	2.80782	-0.549867	0.31251	0.840802	1.34158	-	-	-	HALLMARK_XENOBIOTIC_METABOLISM	Amino acid synthesis and interconversion (transamination)	WP_AMINO_ACID_METABOLISM;WP_METABOLIC_REPROGRAMMING_IN_COLON_CANCER;WP_UREA_CYCLE_AND_ASSOCIATED_PATHWAYS;WP_UREA_CYCLE_AND_METABOLISM_OF_AMINO_GROUPS	-	-	-	+	0.695544	0.290093	0.693328	1.36694	2.49921	0.0005543	P32322	P32322	P5CR1_HUMAN	Pyrroline-5-carboxylate reductase 1, mitochondrial	C (6)		3346	1128
REXO2	C1	-0.361726	-0.58597	-1.18889	-0.63437	-0.724272	0.00915541	-0.234891	0.697292	0.0788865	0.173692	-0.482891	-1.05452	0.842532	2.09456	-0.702548	-0.960055	0.759603	2.27441	-	-	-	-	-	-	-	-	-	+	0.726212	0.272901	0.303487	1.41362	1.19811	0.0361498	Q9Y3B8	Q9Y3B8	ORN_HUMAN	Oligoribonuclease, mitochondrial	C (6)		3347	4541
RIOX1	C1	0.0976805	-1.07383	-1.32829	-0.300725	-0.886504	-0.97978	-0.410231	0.106532	0.527534	-0.12795	0.271871	0.127867	1.03576	1.72857	-1.05222	-0.992485	1.29814	1.95807	-	-	-	-	-	-	-	-	-	+	0.483566	0.43411	0.266902	1.02744	1.42023	0.0156387	Q9H6W3	Q9H6W3	RIOX1_HUMAN	Ribosomal oxygenase 1	C (6)		3348	3893
TARS2	C1	-0.631297	-0.240143	-0.546454	-0.729299	-0.723358	-0.539511	-0.795064	0.10232	-0.416266	-0.565844	-0.487325	-0.111359	0.258396	2.02563	-0.102511	-0.509413	1.28915	2.72235	-	-	-	-	Mitochondrial tRNA aminoacylation	-	-	-	-	+	1.47956	0.0580064	0.635942	2.46927	2.13863	0.00312664	Q9BW92	Q9BW92	SYTM_HUMAN	Threonine--tRNA ligase, mitochondrial	C (6)		3349	3694
ALDH18A1	C1	-0.438882	0.254071	-0.270652	-0.457405	-1.06012	-0.877704	-0.20547	-0.36165	-0.527281	-0.606562	-0.495168	-0.217176	0.391416	2.498	0.154425	-1.15285	1.58622	1.78678	-	-	-	HALLMARK_UNFOLDED_PROTEIN_RESPONSE	-	WP_AMINO_ACID_METABOLISM;WP_UREA_CYCLE_AND_METABOLISM_OF_AMINO_GROUPS	-	-	-	+	1.38296	0.0706699	0.847268	2.33909	1.70997	0.00534543	P54886	P54886	P5CS_HUMAN	Delta-1-pyrroline-5-carboxylate synthase	C (6)		3350	1453
SQSTM1	C1	-0.685399	-0.0224462	-0.388624	0.107346	0.201092	-0.611181	-1.12325	-0.428236	-0.291605	0.177374	-0.546897	-0.682695	0.216932	1.56114	0.132699	-1.53523	1.22176	2.69722	Secretory_3	-	-	HALLMARK_APOPTOSIS;HALLMARK_MTORC1_SIGNALING;HALLMARK_PI3K_AKT_MTOR_SIGNALING;HALLMARK_TNFA_SIGNALING_VIA_NFKB;HALLMARK_UV_RESPONSE_UP	Interleukin-1 signaling;NF-kB is activated and signals survival;NRIF signals cell death from the nucleus;p75NTR recruits signalling complexes;Pink/Parkin Mediated Mitophagy	WP_7Q1123_COPY_NUMBER_VARIATION_SYNDROME;WP_APOPTOSISRELATED_NETWORK_DUE_TO_ALTERED_NOTCH3_IN_OVARIAN_CANCER;WP_BRAINDERIVED_NEUROTROPHIC_FACTOR_BDNF_SIGNALING_PATHWAY;WP_CAMKK2_PATHWAY;WP_CLEAR_CELL_RENAL_CELL_CARCINOMA_PATHWAYS;WP_CLOCKCONTROLLED_AUTOPHAGY_IN_BONE_METABOLISM;WP_IL1_SIGNALING_PATHWAY;WP_INTERLEUKIN1_INDUCED_ACTIVATION_OF_NFKB;WP_NRF2_PATHWAY;WP_NUCLEAR_RECEPTORS_METAPATHWAY;WP_R…	-	-	-	+	1.08888	0.130657	0.566809	1.93694	1.07994	0.0353906	Q13501	Q13501	SQSTM_HUMAN	Sequestosome-1	C (6)		3351	1893
LSM4	C1	0.200916	-1.19349	-1.74268	-1.33465	-0.0304951	-0.707987	0.782297	0.496749	1.8542	0.00672071	-0.00938376	0.359677	1.34378	0.971736	0.417992	0.565058	-1.53033	-0.450109	Unclassified_3	-	-	HALLMARK_UNFOLDED_PROTEIN_RESPONSE	mRNA decay by 5' to 3' exoribonuclease;mRNA Splicing - Major Pathway	WP_CILIARY_LANDSCAPE	-	-	-	+	0.304095	0.606377	-0.140463	-0.705703	1.46965	0.0172896	Q9Y4Z0	Q9Y4Z0	LSM4_HUMAN	U6 snRNA-associated Sm-like protein LSm4	C (5)		3352	4585
LSM6	C1	-0.189233	-0.895836	-1.67515	-1.71674	-0.761448	-0.583382	1.06231	0.237273	1.92781	0.105795	-0.105627	0.148574	1.19843	1.4929	0.449443	-0.20051	-0.753768	0.259154	-	-	-	-	mRNA decay by 5' to 3' exoribonuclease;mRNA Splicing - Major Pathway	-	-	-	-	+	0.126335	0.822452	-0.0458463	-0.330841	2.27519	0.00579951	P62312	P62312	LSM6_HUMAN	U6 snRNA-associated Sm-like protein LSm6	C (5)		3353	1569
LSM3	C1	-0.0874477	-1.0917	-1.90017	-0.36716	-1.60914	-0.530031	-0.0897534	-0.213045	1.86429	-0.438913	0.795426	0.907346	1.42556	0.285183	0.973797	0.245234	-0.744604	0.575124	-	-	-	-	mRNA decay by 5' to 3' exoribonuclease;mRNA Splicing - Major Pathway	-	-	-	-	+	0.00789273	0.989116	-0.00342194	-0.0231443	2.00003	0.00829834	P62310	P62310	LSM3_HUMAN	U6 snRNA-associated Sm-like protein LSm3	C (5)		3354	1568
UBE2R2	C1	-0.64337	-0.0226475	-2.92463	-0.517788	-0.394072	0.134408	0.382065	0.422878	1.02329	0.36654	-0.175754	0.132791	1.54689	-0.229083	1.61592	0.2266	-0.963118	0.0190825	-	-	-	-	Antigen processing: Ubiquitination & Proteasome degradation;Synthesis of active ubiquitiroles of E1 and E2 enzymes	-	-	-	-	+	0.00819714	0.989212	0.0046711	0.0240288	1.07278	0.0392632	Q712K3	Q712K3	UB2R2_HUMAN	Ubiquitin-conjugating enzyme E2 R2	C (5)		3355	2570
BPNT1	C1	-0.525074	-0.531271	-1.95926	-1.1955	-0.224448	-0.112165	0.430036	0.473348	0.694789	0.142284	0.341662	0.356488	1.6214	0.600688	1.20118	0.222329	-2.23333	0.696836	-	-	-	HALLMARK_GLYCOLYSIS	Cytosolic sulfonation of small molecules	-	-	-	-	+	0.034469	0.951242	-0.0176795	-0.0982178	1.18359	0.0422601	O95861	O95861	BPNT1_HUMAN	3'(2'),5'-bisphosphate nucleotidase 1	C (5)		3356	590
EXOSC1	C1	0.864305	-1.96087	-2.51061	-0.31079	0.311424	-1.34765	-0.232627	1.07707	0.660959	0.779813	0.199232	0.582432	0.718454	0.674964	0.389056	0.442771	-0.369836	0.0319029	-	-	-	HALLMARK_UNFOLDED_PROTEIN_RESPONSE	ATF4 activates genes;Butyrate Response Factor 1 (BRF1) binds and destabilizes mRNA;KSRP (KHSRP) binds and destabilizes mRNA;Major pathway of rRNA processing in the nucleolus and cytosol;mRNA decay by 3' to 5' exoribonuclease;Tristetraprolin (TTP, ZFP36) binds and destabilizes mRNA	-	-	-	-	+	0.340418	0.566791	-0.0935248	-0.774338	1.4934	0.0126367	Q9Y3B2	Q9Y3B2	EXOS1_HUMAN	Exosome complex component CSL4	C (5)		3357	4537
PYM1	C1	-0.00242192	-2.2238	-2.22087	-0.858622	-0.242624	-0.733526	0.922978	0.869326	0.248783	0.878386	0.5331	0.724714	0.143913	0.532856	1.36651	0.500035	-0.1206	-0.318131	-	-	-	-	-	-	-	-	-	+	0.647586	0.319179	-0.093088	-1.29289	2.99582	0.0022569	Q9BRP8	Q9BRP8	PYM1_HUMAN	Partner of Y14 and mago	C (5)		3358	3607
IFRD2	C1	-0.598129	-1.81158	-2.29185	-0.660415	0.542125	-0.900963	0.891569	0.554163	1.07063	1.08675	0.767515	1.08681	0.313271	0.739657	-0.777215	0.0319745	-0.262202	0.217881	-	+	STIC_Epithelium PAX8 pos	-	-	-	-	-	-	+	2.42894	0.00985194	-0.719283	-3.75963	3.09669	0.000201511	Q12894	Q12894	IFRD2_HUMAN	Interferon-related developmental regulator 2	C (5)		3359	1831
AAR2	C1	-0.585196	-1.68518	-2.61896	-0.286558	0.239682	0.383921	0.37005	1.1857	0.89977	0.459719	0.25922	0.055357	0.140178	0.874548	0.315428	1.44196	-0.834089	-0.615544	-	-	-	-	-	WP_CILIARY_LANDSCAPE	-	-	-	+	0.358723	0.548603	-0.109765	-0.808159	1.2686	0.0317366	Q9Y312	Q9Y312	AAR2_HUMAN	Protein AAR2 homolog	C (5)		3360	4523
PALS2	C1	0.0815163	0.319937	-3.15785	0.398999	-0.367131	-0.506237	0.229869	0.525141	1.31633	0.621049	1.13182	0.998767	0.580943	-0.292103	-0.792867	-0.717467	-0.121436	-0.249275	-	+	STIC_Epithelium PAX8 pos	-	-	-	-	-	-	+	2.6485	0.00681804	-0.724182	-4.07103	1.42949	0.0102056	Q9NZW5	Q9NZW5	PALS2_HUMAN	Protein PALS2	C (5)		3361	4210
ITPK1	C1	-0.414046	-0.0315252	-3.20234	-0.248091	0.45058	-0.171729	0.135145	0.732089	0.902801	1.48472	0.51272	1.21213	0.176967	-0.0397429	-0.828056	0.0391778	-0.356599	-0.354197	-	+	STIC_Epithelium PAX8 pos	HALLMARK_ESTROGEN_RESPONSE_EARLY;HALLMARK_ESTROGEN_RESPONSE_LATE	Factors involved in megakaryocyte development and platelet production;Synthesis of IP3 and IP4 in the cytosol;Synthesis of pyrophosphates in the cytosol	WP_2Q37_COPY_NUMBER_VARIATION_SYNDROME	-	-	-	+	2.78748	0.00520646	-0.69589	-4.27223	1.60775	0.00679739	Q13572	Q13572	ITPK1_HUMAN	Inositol-tetrakisphosphate 1-kinase	C (5)		3362	1902
CXXC1	C1	-0.0414969	0.00562178	-3.90572	0.0495818	0.0210008	-0.323887	0.284669	0.417429	0.583955	0.253734	0.454214	0.363762	0.29701	0.1335	0.297448	0.376125	0.492613	0.240445	-	-	-	HALLMARK_UNFOLDED_PROTEIN_RESPONSE	XBP1(S) activates chaperone genes	WP_MALE_INFERTILITY	-	-	-	+	0.614306	0.339541	-0.0627179	-1.24066	0.981252	0.0328531	Q9P0U4	Q9P0U4	CXXC1_HUMAN	CXXC-type zinc finger protein 1	C (5)		3363	4223
POLR2L	C1	0.0620173	0.0650906	-3.7169	-0.200364	-0.0456173	-0.833575	0.630468	0.706475	0.50105	0.570523	0.596635	0.584951	-0.0444673	0.147234	0.207087	0.306613	0.214654	0.248127	-	+	STIC_Epithelium PAX8 pos	-	Abortive elongation of HIV-1 transcript in the absence of Tat;Activation of anterior HOX genes in hindbrain development during early embryogenesis;B-WICH complex positively regulates rRNA expression;Cytosolic sensors of pathogen-associated DNA;Dual incision in TC-NER;FGFR2 alternative splicing;Formation of HIV elongation complex in the absence of HIV Tat;Formation of HIV-1 elongation complex cont…	WP_2Q13_COPY_NUMBER_VARIATION_SYNDROME;WP_CYTOSOLIC_DNASENSING_PATHWAY;WP_PYRIMIDINE_METABOLISM	-	-	-	+	4.61089	0.000271186	-0.329703	-7.3514	1.41084	0.00947139	P62875	P62875	RPAB5_HUMAN	DNA-directed RNA polymerases I, II, and III subunit RPABC5	C (5)		3364	1593
TCF20	C1	0.0837017	-0.388499	-3.67896	0.159383	-0.145713	-0.444484	0.658029	0.718472	0.612512	0.582418	0.726293	0.540698	-0.179416	0.190612	-0.282552	-0.0571041	0.549418	0.355196	-	+	STIC_Epithelium PAX8 pos	-	-	WP_MATRIX_METALLOPROTEINASES	-	-	-	+	2.60424	0.00746547	-0.333587	-4.00764	1.34733	0.0137998	Q9UGU0	Q9UGU0	TCF20_HUMAN	Transcription factor 20	C (5)		3365	4307
PLCB3	C1	0.220982	0.345775	-3.83134	-0.190209	-0.213871	-0.255543	0.369269	0.585138	0.352419	0.349925	0.456029	0.45629	0.610291	-0.191946	-0.100497	0.371915	0.127024	0.538348	-	-	-	-	Acetylcholine regulates insulin secretion;Ca2+ pathway;Fatty Acids bound to GPR40 (FFAR1) regulate insulin secretion;G alpha (q) signalling events;G beta:gamma signalling through PLC beta;PLC beta mediated events;Presynaptic function of Kainate receptors;Synthesis of IP3 and IP4 in the cytosol	WP_ALZHEIMERS_DISEASE;WP_ALZHEIMERS_DISEASE_AND_MIRNA_EFFECTS;WP_CALCIUM_REGULATION_IN_CARDIAC_CELLS;WP_CHEMOKINE_SIGNALING_PATHWAY;WP_G_PROTEIN_SIGNALING_PATHWAYS;WP_GPR143_IN_MELANOCYTES_AND_RETINAL_PIGMENT_EPITHELIUM_CELLS;WP_GPR40_PATHWAY;WP_HIPPO_SIGNALING_REGULATION_PATHWAYS;WP_KISSPEPTINKISSPEPTIN_RECEPTOR_SYSTEM_IN_THE_OVARY;WP_MAPK_CASCADE;WP_MYOMETRIAL_RELAXATION_AND_CONTRACTION_PATHWAY…	-	-	-	+	0.738155	0.265845	-0.1395	-1.43166	0.866946	0.0477816	Q01970	Q01970	PLCB3_HUMAN	1-phosphatidylinositol 4,5-bisphosphate phosphodiesterase beta-3	C (5)		3366	1706
MAX	C1	-0.0671429	0.0801801	-3.79555	0.26165	-0.262013	-0.316914	0.304754	0.177252	0.482641	0.301969	0.693152	0.691407	0.228195	0.145526	0.052434	0.731772	-0.231946	0.52263	-	-	-	-	Cyclin A:Cdk2-associated events at S phase entry;Cyclin E associated events during G1/S transition;Transcription of E2F targets under negative control by DREAM complex;Transcriptional Regulation by E2F6	WP_B_CELL_RECEPTOR_SIGNALING_PATHWAY;WP_MALIGNANT_PLEURAL_MESOTHELIOMA;WP_MAPK_SIGNALING_PATHWAY;WP_P38_MAPK_SIGNALING_PATHWAY;WP_PATHWAYS_AFFECTED_IN_ADENOID_CYSTIC_CARCINOMA;WP_SMALL_CELL_LUNG_CANCER	-	-	-	+	0.594512	0.353323	-0.122906	-1.20924	0.955633	0.0399982	P61244	P61244	MAX_HUMAN	Protein max	C (5)		3367	1528
POLR3D	C1	-0.138035	-0.171772	-3.10643	-0.131308	-0.12155	-0.726041	0.292137	0.511985	0.90007	0.433872	0.515536	0.392359	0.503755	1.55395	-1.44171	0.149982	0.428034	0.15516	-	-	-	-	Cytosolic sensors of pathogen-associated DNA;RNA Polymerase III Abortive And Retractive Initiation;RNA Polymerase III Chain Elongation;RNA Polymerase III Transcription Initiation From Type 1 Promoter;RNA Polymerase III Transcription Initiation From Type 2 Promoter;RNA Polymerase III Transcription Initiation From Type 3 Promoter;RNA Polymerase III Transcription Termination	WP_CYTOSOLIC_DNASENSING_PATHWAY;WP_EUKARYOTIC_TRANSCRIPTION_INITIATION;WP_PYRIMIDINE_METABOLISM	-	-	-	+	0.301265	0.6092	-0.157972	-0.700265	1.15335	0.0248815	P05423	P05423	RPC4_HUMAN	DNA-directed RNA polymerase III subunit RPC4	C (5)		3368	677
METTL14	C1	0.394911	0.185375	-3.16196	0.290746	-0.733023	-0.276653	1.11753	0.660287	0.767748	0.388373	0.630114	0.88577	0.622134	0.556139	-0.442879	-0.0953539	-0.848578	-0.940681	-	+	STIC_Epithelium PAX8 pos	-	Processing of Capped Intron-Containing Pre-mRNA	-	-	-	-	+	2.00356	0.0207627	-0.36535	-3.17409	1.22699	0.0298968	Q9HCE5	Q9HCE5	MET14_HUMAN	N6-adenosine-methyltransferase non-catalytic subunit	C (5)		3369	3974
HABP2	C1	-0.28837	-0.208248	-2.78665	-0.356614	-0.474738	-0.616404	1.56398	1.13762	1.0758	0.940374	0.894625	0.67632	0.37712	-0.0630967	-0.938851	-0.237632	-0.276379	-0.418866	-	+	STIC_Epithelium PAX8 pos	-	-	-	-	-	-	+	3.93539	0.000821918	-0.905188	-6.09773	3.24687	0.000198347	Q14520	Q14520	HABP2_HUMAN	Hyaluronan-binding protein 2	C (5)		3370	1976
PSMB6	C1	-0.391062	0.12546	-2.78397	-0.705336	-0.232519	-0.0712371	0.975224	0.85423	1.32424	1.18153	0.783367	0.82156	-0.778017	0.484038	-0.487096	0.413964	-0.685511	-0.828865	-	+	STIC_Epithelium PAX8 pos	-	ABC-family proteins mediated transport;Activation of NF-kappaB in B cells;Antigen processing: Ubiquitination & Proteasome degradation;APC/C:Cdc20 mediated degradation of Securin;APC/C:Cdh1 mediated degradation of Cdc20 and other APC/C:Cdh1 targeted proteins in late mitosis/early G1;Asymmetric localization of PCP proteins;AUF1 (hnRNP D0) binds and destabilizes mRNA;Autodegradation of Cdh1 by Cdh1:…	WP_ALZHEIMERS_DISEASE;WP_ALZHEIMERS_DISEASE_AND_MIRNA_EFFECTS;WP_PROTEASOME_DEGRADATION	-	-	-	+	3.25879	0.00242308	-0.377647	-4.98289	2.5445	0.00387629	P28072	P28072	PSB6_HUMAN	Proteasome subunit beta type-6	C (5)		3371	1055
GLTP	C1	-0.921794	0.274232	-1.63812	-1.04727	-0.530301	-0.645769	1.16706	0.583923	0.354718	0.55268	0.272646	0.859805	1.31202	1.6148	-0.429303	0.381466	-1.99019	-0.170608	-	-	-	-	Glycosphingolipid metabolism	-	-	-	-	+	0.426251	0.482274	-0.163475	-0.929028	1.37953	0.027543	Q9NZD2	Q9NZD2	GLTP_HUMAN	Glycolipid transfer protein	C (5)		3372	4193
UROD	C1	-0.530368	-0.55301	-1.93616	-1.04438	-0.40217	-0.0207006	1.04882	0.320836	0.861277	0.687057	0.180948	0.339623	1.44795	1.99564	-1.03256	-0.224684	-1.27719	0.139067	-	-	-	HALLMARK_FATTY_ACID_METABOLISM;HALLMARK_HEME_METABOLISM;HALLMARK_UV_RESPONSE_UP	Heme biosynthesis	WP_HEME_BIOSYNTHESIS;WP_HEMESYNTHESIS_DEFECTS_AND_PORPHYRIAS	-	-	-	+	0.310086	0.598981	-0.1718	-0.717169	1.27567	0.0237356	P06132	P06132	DCUP_HUMAN	Uroporphyrinogen decarboxylase	C (5)		3373	680
ATAD3C	C1	-0.553147	-1.21114	-1.39148	-0.631738	-1.35215	-0.697417	1.31703	0.841621	0.531781	0.486073	0.517529	-0.227352	1.62549	1.84066	0.329577	-0.369384	-1.00904	-0.0469231	-	-	-	-	-	-	-	-	-	+	0.139784	0.805068	-0.0795821	-0.362123	2.30326	0.00262276	Q5T2N8	Q5T2N8	ATD3C_HUMAN	ATPase family AAA domain-containing protein 3C	C (5)		3374	2318
LDHA	C1	-0.791486	-0.843719	-1.46718	-1.0371	-1.46848	-0.8752	1.16248	1.02607	0.57288	0.383708	0.600938	0.441588	1.32535	1.89653	-0.152347	-0.122791	-0.811219	0.159984	Unclassified_2;Unclassified_3	-	-	HALLMARK_FATTY_ACID_METABOLISM;HALLMARK_GLYCOLYSIS;HALLMARK_HYPOXIA;HALLMARK_MTORC1_SIGNALING;HALLMARK_MYC_TARGETS_V1;HALLMARK_OXIDATIVE_PHOSPHORYLATION	Pyruvate metabolism	WP_AEROBIC_GLYCOLYSIS;WP_AMINO_ACID_METABOLISM;WP_CCL18_SIGNALING_PATHWAY;WP_CLEAR_CELL_RENAL_CELL_CARCINOMA_PATHWAYS;WP_CORI_CYCLE;WP_GLUCOSE_METABOLISM_IN_TRIPLENEGATIVE_BREAST_CANCER_CELLS;WP_GLYCOLYSIS_AND_GLUCONEOGENESIS;WP_GLYCOLYSIS_IN_SENESCENCE;WP_GLYOXYLATE_METABOLISM;WP_HEREDITARY_LEIOMYOMATOSIS_AND_RENAL_CELL_CARCINOMA_PATHWAY;WP_HIF1A_AND_PPARG_REGULATION_OF_GLYCOLYSIS;WP_KREBS_CYCLE…	+	Cancer-related genes, Disease variant, FDA approved drug targets, Glycogen storage disease	11	+	0.313064	0.59629	-0.260678	-0.722847	3.28871	0.000134454	P00338	P00338	LDHA_HUMAN	L-lactate dehydrogenase A chain	C (5)		3375	610
EXOSC5	C1	-1.25956	-0.353827	-2.03602	-1.06736	-0.576887	-1.13108	0.184407	1.13979	0.908384	0.362962	0.735962	0.975256	0.681153	1.61047	0.0819051	0.616023	-1.06234	0.190754	-	-	-	HALLMARK_MYC_TARGETS_V2;HALLMARK_UNFOLDED_PROTEIN_RESPONSE	ATF4 activates genes;Butyrate Response Factor 1 (BRF1) binds and destabilizes mRNA;KSRP (KHSRP) binds and destabilizes mRNA;Major pathway of rRNA processing in the nucleolus and cytosol;mRNA decay by 3' to 5' exoribonuclease;Tristetraprolin (TTP, ZFP36) binds and destabilizes mRNA	-	-	-	-	+	0.430506	0.47926	-0.137969	-0.936456	3.24291	0.000610979	Q9NQT4	Q9NQT4	EXOS5_HUMAN	Exosome complex component RRP46	C (5)		3376	4028
EXOSC9	C1	-1.11915	0.090381	-1.43619	-0.677297	-1.13218	-1.3367	0.3034	1.22053	0.703693	0.207506	0.25068	0.696564	0.25699	2.09262	0.314142	1.0193	-1.37564	-0.0786606	-	-	-	HALLMARK_UNFOLDED_PROTEIN_RESPONSE	ATF4 activates genes;Butyrate Response Factor 1 (BRF1) binds and destabilizes mRNA;KSRP (KHSRP) binds and destabilizes mRNA;Major pathway of rRNA processing in the nucleolus and cytosol;mRNA decay by 3' to 5' exoribonuclease;Tristetraprolin (TTP, ZFP36) binds and destabilizes mRNA	WP_CILIARY_LANDSCAPE	-	-	-	+	0.150552	0.789712	-0.0588735	-0.386746	2.06508	0.00779338	Q06265	Q06265	EXOS9_HUMAN	Exosome complex component RRP45	C (5)		3377	1759
EXOSC2	C1	-0.443022	0.163743	-2.51166	-0.00350166	-1.12384	-0.512798	0.543245	1.06594	0.750237	0.0605546	0.200038	0.974672	0.423677	1.70741	-0.0948329	0.413405	-1.63689	0.0236402	-	-	-	HALLMARK_UNFOLDED_PROTEIN_RESPONSE	ATF4 activates genes;Butyrate Response Factor 1 (BRF1) binds and destabilizes mRNA;KSRP (KHSRP) binds and destabilizes mRNA;Major pathway of rRNA processing in the nucleolus and cytosol;mRNA decay by 3' to 5' exoribonuclease;Tristetraprolin (TTP, ZFP36) binds and destabilizes mRNA	WP_CILIARY_LANDSCAPE	-	-	-	+	0.45265	0.460219	-0.134989	-0.97479	1.28523	0.038172	Q13868	Q13868	EXOS2_HUMAN	Exosome complex component RRP4	C (5)		3378	1927
DPP3	C1	-0.314245	-0.239451	-1.16821	-1.50079	-0.918697	0.100252	0.091044	0.296901	0.885663	0.734559	-0.538987	-0.469048	2.19324	2.25805	-0.496787	-0.235613	-0.357356	-0.320522	-	-	-	-	-	-	-	-	-	+	0.235873	0.683161	0.16304	0.570494	0.983303	0.0452186	Q9NY33	Q9NY33	DPP3_HUMAN	Dipeptidyl peptidase 3	C (5)		3379	4170
YWHAB	C1	-0.949994	-0.885044	-2.1439	-1.64348	-0.0783896	0.0347223	0.349454	0.981214	0.535216	1.12004	-0.276585	-0.504699	0.749044	2.04803	0.381958	0.136509	-0.173857	0.319756	-	-	-	HALLMARK_PI3K_AKT_MTOR_SIGNALING	Activation of BAD and translocation to mitochondria;ARMS-mediated activation;Butyrate Response Factor 1 (BRF1) binds and destabilizes mRNA;Chk1/Chk2(Cds1) mediated inactivation of Cyclin B:Cdk1 complex;Frs2-mediated activation;MAP2K and MAPK activation;mTOR signalling;mTORC1-mediated signalling;Negative regulation of MAPK pathway;Paradoxical activation of RAF signaling by kinase inactive BRAF;RAF…	WP_CALCIUM_REGULATION_IN_CARDIAC_CELLS;WP_CELL_CYCLE;WP_HEPATITIS_B_INFECTION;WP_IL3_SIGNALING_PATHWAY;WP_MALIGNANT_PLEURAL_MESOTHELIOMA;WP_MYOMETRIAL_RELAXATION_AND_CONTRACTION_PATHWAYS;WP_SUDDEN_INFANT_DEATH_SYNDROME_SIDS_SUSCEPTIBILITY_PATHWAYS	-	-	-	+	0.203525	0.722197	0.06195	0.502999	2.12914	0.00745082	P31946	P31946	1433B_HUMAN	14-3-3 protein beta/alpha	C (5)		3380	1119
EXOSC4	C1	-0.636426	-0.266835	-0.871407	-0.649596	-1.0471	-1.3377	-0.113042	0.488248	1.13638	0.655708	0.905052	1.43078	0.178378	1.5428	0.192649	1.05011	-1.84548	-0.812504	-	-	-	HALLMARK_UNFOLDED_PROTEIN_RESPONSE	ATF4 activates genes;Butyrate Response Factor 1 (BRF1) binds and destabilizes mRNA;KSRP (KHSRP) binds and destabilizes mRNA;Major pathway of rRNA processing in the nucleolus and cytosol;mRNA decay by 3' to 5' exoribonuclease;Tristetraprolin (TTP, ZFP36) binds and destabilizes mRNA	WP_CILIARY_LANDSCAPE	-	-	-	+	0.634751	0.327116	-0.182911	-1.27283	1.81077	0.0163415	Q9NPD3	Q9NPD3	EXOS4_HUMAN	Exosome complex component RRP41	C (5)		3381	4001
EXOSC8	C1	-0.330854	-0.363465	-1.44411	-0.565678	-1.07099	-1.24087	0.0625513	0.751406	0.688656	0.90639	0.87453	0.931557	-0.128316	1.59228	-0.0571047	1.55741	-1.73306	-0.430331	Unclassified_3	-	-	HALLMARK_E2F_TARGETS	ATF4 activates genes;Butyrate Response Factor 1 (BRF1) binds and destabilizes mRNA;KSRP (KHSRP) binds and destabilizes mRNA;Major pathway of rRNA processing in the nucleolus and cytosol;mRNA decay by 3' to 5' exoribonuclease;Tristetraprolin (TTP, ZFP36) binds and destabilizes mRNA	-	-	-	-	+	0.504712	0.41799	-0.174963	-1.06291	1.81464	0.0121279	Q96B26	Q96B26	EXOS8_HUMAN	Exosome complex component RRP43	C (5)		3382	3249
CARD9	C1	0.230854	0.0046826	-1.03286	-1.6135	0.31196	-0.936615	0.193628	1.10631	0.48821	1.11839	0.77486	0.75607	0.254966	0.599719	-0.545935	1.21249	-2.43984	-0.483385	-	-	-	-	CLEC7A (Dectin-1) signaling;NOD1/2 Signaling Pathway	WP_NUCLEOTIDEBINDING_OLIGOMERIZATION_DOMAIN_NOD_PATHWAY	-	-	-	+	0.996873	0.156681	-0.644922	-1.80805	1.17414	0.0203993	Q9H257	Q9H257	CARD9_HUMAN	Caspase recruitment domain-containing protein 9	C (5)		3383	3823
CRMP1	C1	-0.0153251	0.0189813	-0.955182	0.398266	-1.22885	-1.17452	0.9673	0.558627	1.20069	0.852853	1.24991	1.20004	-0.424457	0.212532	-1.22866	1.08735	-1.40704	-1.31252	-	+	STIC_Epithelium PAX8 pos	HALLMARK_HEDGEHOG_SIGNALING	CRMPs in Sema3A signaling	-	-	-	-	+	2.29542	0.0123053	-3.59728	-3.57364	2.49188	0.000280384	Q14194	Q14194	DPYL1_HUMAN	Dihydropyrimidinase-related protein 1	C (5)		3384	1959
MPST	C1	0.213786	-0.236618	-1.20849	-0.603722	-1.16398	-1.65331	1.71662	0.285157	1.07177	0.648205	1.01347	0.915221	0.00480748	1.31276	-0.398182	0.287182	-1.35602	-0.848669	-	+	STIC_Epithelium PAX8 pos	-	-	WP_AMINO_ACID_METABOLISM;WP_CYSTEINE_AND_METHIONINE_CATABOLISM;WP_TRANSSULFURATION_PATHWAY	-	-	-	+	1.56829	0.0490058	-0.571387	-2.58846	2.49396	0.00136637	P25325	P25325	THTM_HUMAN	3-mercaptopyruvate sulfurtransferase	C (5)		3385	1012
NRBP1	C1	-0.762575	-1.16694	-1.00763	-0.7205	-0.644557	-1.13679	1.38515	0.0291898	-0.495243	1.3057	0.0202615	0.660939	1.01846	0.415521	0.293002	2.10402	-1.33553	0.0375131	-	-	-	-	Nuclear Receptor transcription pathway	-	-	-	-	+	0.0393009	0.943923	-0.0251803	-0.11143	1.86379	0.00709354	Q9UHY1	Q9UHY1	NRBP_HUMAN	Nuclear receptor-binding protein	C (5)		3386	4332
AVL9	C1	-1.43083	-0.195743	-1.40887	-1.26289	-1.08653	-0.769568	1.80352	-0.0391951	0.380203	0.355651	0.702121	1.03731	1.29823	-0.183299	-0.236915	1.41173	-0.748359	0.373422	-	-	-	HALLMARK_KRAS_SIGNALING_UP	-	-	-	-	-	+	0.39268	0.514391	-0.13591	-0.869665	2.85294	0.0015104	Q8NBF6	Q8NBF6	AVL9_HUMAN	Late secretory pathway protein AVL9 homolog	C (5)		3387	2912
TSC22D1	C1	-1.57827	-0.550441	-1.6601	-0.660214	-0.601315	-0.318281	1.47546	0.906391	-0.0633158	1.19438	0.461374	0.600321	0.206782	0.590237	-0.602092	1.9611	-0.576285	-0.785727	Ciliated_2	-	-	HALLMARK_ANDROGEN_RESPONSE;HALLMARK_P53_PATHWAY;HALLMARK_TNFA_SIGNALING_VIA_NFKB	-	WP_ECTODERM_DIFFERENTIATION	-	-	-	+	0.6575	0.312882	-0.374883	-1.30831	2.21834	0.00194989	Q15714	Q15714	T22D1_HUMAN	TSC22 domain family protein 1	C (5)		3388	2094
CIAO1	C1	-0.463714	-0.463857	-2.09322	-1.56061	-0.505723	-0.298996	0.993611	1.03634	0.557061	1.41659	0.11047	-0.264542	0.222554	0.691575	-0.644749	1.85799	-0.729526	0.138751	-	-	-	-	Cytosolic iron-sulfur cluster assembly	WP_2Q112_COPY_NUMBER_VARIATION_SYNDROME	-	-	-	+	0.368133	0.539302	-0.100718	-0.82536	1.96418	0.0124857	O76071	O76071	CIAO1_HUMAN	Probable cytosolic iron-sulfur protein assembly protein CIAO1	C (5)		3389	485
FAM169A	C1	-0.290327	0.0817153	-0.630012	0.0169744	-0.485506	-0.328951	2.09979	0.0758059	0.396265	0.914602	0.751129	0.834798	0.204979	-0.00196237	1.1457	-1.81206	-1.01689	-1.95606	-	-	-	-	-	-	-	-	-	+	1.478	0.0581936	-1.68966	-2.46716	1.63283	0.00398013	Q9Y6X4	Q9Y6X4	F169A_HUMAN	Soluble lamin-associated protein of 75 kDa	C (5)		3390	4659
PCYOX1	C1	-1.0433	0.0957615	-1.07392	-0.311369	-0.230818	-0.743013	2.3368	0.72758	0.399808	0.663284	0.729559	0.124403	0.303867	-0.751167	1.7699	-0.8031	-0.913099	-1.28117	-	-	-	-	-	-	-	-	-	+	1.11795	0.123098	-0.54817	-1.97729	1.54644	0.0107234	Q9UHG3	Q9UHG3	PCYOX_HUMAN	Prenylcysteine oxidase 1	C (5)		3391	4317
TUBA4A	C1	-0.708301	-0.566545	-1.86467	-1.33603	0.533073	-0.170451	1.60092	0.255078	1.119	0.767172	1.01182	0.511928	0.108785	0.503019	1.04166	-1.45303	-0.1917	-1.16173	Unclassified_2;Unclassified_3	-	-	HALLMARK_MITOTIC_SPINDLE;HALLMARK_MTORC1_SIGNALING;HALLMARK_UV_RESPONSE_UP	Anchoring of the basal body to the plasma membrane;AURKA Activation by TPX2;Carboxyterminal post-translational modifications of tubulin;Cilium Assembly;COPI-dependent Golgi-to-ER retrograde traffic;COPI-independent Golgi-to-ER retrograde traffic;COPI-mediated anterograde transport;Formation of tubulin folding intermediates by CCT/TriC;Gap junction assembly;Hedgehog 'off' state;HSP90 chaperone cyc…	WP_ALZHEIMERS_DISEASE;WP_ALZHEIMERS_DISEASE_AND_MIRNA_EFFECTS;WP_PARKINUBIQUITIN_PROTEASOMAL_SYSTEM_PATHWAY;WP_PATHOGENIC_ESCHERICHIA_COLI_INFECTION	+	Amyotrophic lateral sclerosis, FDA approved drug targets, Neurodegeneration	2	+	1.4591	0.0606112	-0.273008	-2.44174	1.95166	0.0133893	Cont_P81948;P68366	P68366;P68363;Cont_P81948	TBA4A_BOVIN;TBA4A_HUMAN	Tubulin alpha-4A chain	C (5)		3392	79
RETREG3	C1	-1.76992	0.0836106	-1.42572	0.314319	-0.473625	-1.85697	1.74463	1.51763	0.351432	0.213398	-0.230072	0.880398	0.109639	0.71396	0.658046	0.0758778	-0.0405968	-0.866034	-	-	-	-	-	-	-	-	-	+	0.866104	0.206322	-0.19325	-1.62087	1.99822	0.00893819	Q86VR2	Q86VR2	RETR3_HUMAN	Reticulophagy regulator 3	C (5)		3393	2677
SOAT1	C1	-0.820828	-0.0940767	-0.645195	0.637592	-1.04671	-1.64158	2.03689	0.771564	1.2683	0.707572	-0.560435	-0.0735383	0.278893	0.205388	1.43048	-0.413509	-1.25657	-0.784243	-	-	-	-	LDL clearance	WP_CHOLESTEROL_METABOLISM;WP_CHOLESTEROL_METABOLISM_WITH_BLOCH_AND_KANDUTSCHRUSSELL_PATHWAYS;WP_METABOLIC_REPROGRAMMING_IN_PANCREATIC_CANCER;WP_STATIN_INHIBITION_OF_CHOLESTEROL_PRODUCTION	+	FDA approved drug targets	1	+	0.746664	0.261992	-0.393366	-1.44447	1.15968	0.0269755	P35610	P35610	SOAT1_HUMAN	Sterol O-acyltransferase 1	C (5)		3394	1169
HEBP1	C1	-0.545417	0.101057	-0.481465	-1.34622	-0.836107	-0.921884	0.982019	0.993224	0.550066	1.30719	-0.320424	1.84919	-0.586183	-0.244244	0.954376	0.31198	-2.03293	0.265779	-	-	-	HALLMARK_HEME_METABOLISM	Formyl peptide receptors bind formyl peptides and many other ligands;G alpha (i) signalling events	WP_CIRCADIAN_RHYTHM_GENES	-	-	-	+	1.24964	0.0936619	-0.467386	-2.15819	1.99739	0.00516735	Q9NRV9	Q9NRV9	HEBP1_HUMAN	Heme-binding protein 1	C (5)		3395	4058
RWDD1	C1	-1.38316	0.455625	-1.42069	-1.51272	-1.46561	0.391897	0.837305	0.583833	0.763386	0.837403	0.586852	0.779305	0.427482	0.54779	0.770042	0.49607	-1.90459	0.20978	-	-	-	-	-	-	-	-	-	+	0.828798	0.223033	-0.605958	-1.56641	1.83345	0.00280875	Q9H446	Q9H446	RWDD1_HUMAN	RWD domain-containing protein 1	C (5)		3396	3858
SWAP70	C1	0.0502112	-0.164693	-0.662003	-0.431155	0.249776	-0.674166	1.40728	1.00609	0.702742	0.841608	1.0107	0.600118	0.389643	-0.629728	0.584452	-0.528931	-2.88706	-0.864892	-	+	STIC_Epithelium PAX8 pos	HALLMARK_IL2_STAT5_SIGNALING	-	-	-	-	-	+	1.91387	0.0248681	-0.639798	-3.05279	2.14279	0.00414197	Q9UH65	Q9UH65	SWP70_HUMAN	Switch-associated protein 70	C (5)		3397	4310
ARHGAP1	C1	-0.51068	-0.264634	-1.04253	-0.52496	-0.202276	-0.892327	1.55364	0.851339	0.347735	1.01109	0.878891	0.479129	0.39573	1.103	0.723868	-0.396536	-2.45152	-1.05896	-	-	-	-	Rho GTPase cycle	-	-	-	-	+	1.13637	0.11857	-0.465932	-2.00275	1.66845	0.0103682	Q07960	Q07960	RHG01_HUMAN	Rho GTPase-activating protein 1	C (5)		3398	1777
TXNL1	C1	0.16721	-0.335017	-1.85673	-0.447044	-0.3754	-0.411121	0.951175	0.363706	1.07158	1.02537	0.397702	0.841449	1.42284	0.0359549	0.170758	-0.0215845	-2.55913	-0.441725	-	-	-	-	-	-	-	-	-	+	1.0208	0.149541	-0.333041	-1.84176	1.32965	0.02929	O43396	O43396	TXNL1_HUMAN	Thioredoxin-like protein 1	C (5)		3399	276
ZNF830	C1	-2.14717	-0.489886	-1.2211	0.0957629	0.0827508	-0.280581	1.219	1.61069	0.760715	-0.684053	0.294813	0.947942	-0.677156	-0.00677695	1.58067	-0.867161	-0.708608	0.490141	-	-	-	-	Dual incision in TC-NER;Formation of TC-NER Pre-Incision Complex;Gap-filling DNA repair synthesis and ligation in TC-NER;Transcription-Coupled Nucleotide Excision Repair (TC-NER)	WP_17Q12_COPY_NUMBER_VARIATION_SYNDROME	-	-	-	+	0.735821	0.267168	-0.297535	-1.42814	1.27002	0.0254286	Q96NB3	Q96NB3	ZN830_HUMAN	Zinc finger protein 830	C (5)		3400	3444
POLR2C	C1	-0.970194	-1.17864	-1.82616	0.0272701	-0.170027	-0.938259	0.783994	1.40799	1.1283	0.104965	1.25634	1.54498	-0.0849555	0.0170798	0.855829	-0.721985	-1.14383	-0.0927026	-	+	STIC_Epithelium PAX8 pos	HALLMARK_DNA_REPAIR	Abortive elongation of HIV-1 transcript in the absence of Tat;Activation of anterior HOX genes in hindbrain development during early embryogenesis;Dual incision in TC-NER;FGFR2 alternative splicing;Formation of HIV elongation complex in the absence of HIV Tat;Formation of HIV-1 elongation complex containing HIV-1 Tat;Formation of RNA Pol II elongation complex;Formation of TC-NER Pre-Incision Comp…	WP_EUKARYOTIC_TRANSCRIPTION_INITIATION;WP_PYRIMIDINE_METABOLISM	-	-	-	+	2.23792	0.0133417	-0.177568	-3.49422	3.36553	0.00935758	P19387	P19387	RPB3_HUMAN	DNA-directed RNA polymerase II subunit RPB3	C (5)		3401	928
KBTBD2	C1	-1.59107	-1.71414	-1.33315	0.718462	0.761146	-0.308561	0.810054	0.350766	0.798311	0.425907	0.489656	0.614524	0.501587	0.455368	0.671155	0.286643	-2.28742	0.350758	-	-	-	-	-	-	-	-	-	+	0.622764	0.334097	-0.604135	-1.254	0.882045	0.0364216	Q8IY47	Q8IY47	KBTB2_HUMAN	Kelch repeat and BTB domain-containing protein 2	C (5)		3402	2777
KPNB1	C1	-0.706735	-0.819103	-1.61805	-0.956825	-1.22243	-0.993135	0.647063	0.536824	1.11635	1.04573	0.875171	1.1651	-0.144331	0.892856	1.27843	0.512083	-0.240464	-1.36853	-	-	-	HALLMARK_G2M_CHECKPOINT;HALLMARK_MYC_TARGETS_V1	Activation of DNA fragmentation factor;ISG15 antiviral mechanism;Neutrophil degranulation;NS1 Mediated Effects on Host Pathways;Nuclear import of Rev protein;Regulation of cholesterol biosynthesis by SREBP (SREBF);Transport of Ribonucleoproteins into the Host Nucleus	WP_22Q112_COPY_NUMBER_VARIATION_SYNDROME;WP_STEROL_REGULATORY_ELEMENTBINDING_PROTEINS_SREBP_SIGNALING	-	-	-	+	1.02655	0.147704	-0.229478	-1.84983	3.75274	0.000507268	Q14974	Q14974	IMB1_HUMAN	Importin subunit beta-1	C (5)		3403	2008
USP5	C1	-0.951016	-0.837521	-1.61718	-1.1118	-1.07377	-1.06311	0.844028	0.311692	1.13691	0.930165	0.944796	1.09363	-0.814827	0.99552	0.705889	1.31333	-0.407248	-0.399485	-	-	-	-	Synthesis of active ubiquitiroles of E1 and E2 enzymes;Ub-specific processing proteases	WP_IL18_SIGNALING_PATHWAY	-	-	-	+	0.919779	0.18421	-0.260693	-1.69835	4.19951	0.00013574	P45974	P45974	UBP5_HUMAN	Ubiquitin carboxyl-terminal hydrolase 5	C (5)		3404	1257
CBX1	C1	0.133516	-0.597055	-2.31623	-0.9119	-1.02203	-1.14449	0.544642	0.484282	0.91709	0.885163	0.648867	0.496111	-0.594272	1.15497	0.862569	1.15412	0.441947	-1.1373	-	-	-	HALLMARK_G2M_CHECKPOINT	-	WP_EFFECT_OF_PROGERIN_ON_GENES_INVOLVED_IN_HUTCHINSONGILFORD_PROGERIA_SYNDROME	-	-	-	+	0.391797	0.515376	-0.161375	-0.868086	2.43289	0.00188082	P83916	P83916	CBX1_HUMAN	Chromobox protein homolog 1	C (5)		3405	1657
CBX5	C1	-0.596628	-0.621952	-1.12526	-0.652526	-1.12092	-1.13672	0.17241	0.42857	0.853581	0.899557	0.922635	0.933729	-1.01759	0.397614	0.812836	1.82275	0.716689	-1.68877	-	-	-	HALLMARK_E2F_TARGETS	Factors involved in megakaryocyte development and platelet production;SUMOylation of chromatin organization proteins;Transcriptional Regulation by E2F6	WP_22Q112_COPY_NUMBER_VARIATION_SYNDROME;WP_EFFECT_OF_PROGERIN_ON_GENES_INVOLVED_IN_HUTCHINSONGILFORD_PROGERIA_SYNDROME	-	-	-	+	0.449947	0.46301	-0.352025	-0.970139	1.97771	0.00282734	P45973	P45973	CBX5_HUMAN	Chromobox protein homolog 5	C (5)		3406	1256
TCEA1	C1	-0.140302	-1.1049	-1.8238	-1.22099	0.414757	-0.579928	0.9818	0.37032	1.21521	0.179314	0.90979	0.768636	-0.963954	0.839177	1.31765	0.790169	-0.474167	-1.47878	-	-	-	HALLMARK_HEME_METABOLISM;HALLMARK_MTORC1_SIGNALING	Dual incision in TC-NER;Formation of HIV elongation complex in the absence of HIV Tat;Formation of HIV-1 elongation complex containing HIV-1 Tat;Formation of RNA Pol II elongation complex;Formation of TC-NER Pre-Incision Complex;Gap-filling DNA repair synthesis and ligation in TC-NER;HIV elongation arrest and recovery;Pausing and recovery of HIV elongation;Pausing and recovery of Tat-mediated HIV…	-	-	-	-	+	0.782658	0.244666	-0.172074	-1.49828	1.59179	0.0296124	P23193	Q15560;P23193	TCEA1_HUMAN	Transcription elongation factor A protein 1	C (5)		3407	986
OSTC	C1	-1.15398	-0.647246	-1.58134	-1.33181	-0.998591	-0.445923	1.90854	1.22822	0.885949	1.10835	0.861108	0.843794	-0.680025	-0.0740055	0.581305	-0.0577061	0.13182	-0.578444	-	+	STIC_Epithelium PAX8 pos	HALLMARK_FATTY_ACID_METABOLISM	-	-	-	-	-	+	3.24224	0.0024858	-0.562597	-4.9571	5.85934	5.84e-06	Q9NRP0	Q9NRP0	OSTC_HUMAN	Oligosaccharyltransferase complex subunit OSTC	C (5)		3408	4052
LIG3	C1	-0.276448	-0.733685	-1.92193	-1.12711	-0.625079	-1.13189	1.27381	0.763425	1.35089	0.929038	1.16372	0.988342	-0.43018	-0.657741	1.2897	-0.277661	-0.285551	-0.291654	-	+	STIC_Epithelium PAX8 pos	HALLMARK_G2M_CHECKPOINT	APEX1-Independent Resolution of AP Sites via the Single Nucleotide Replacement Pathway;Gap-filling DNA repair synthesis and ligation in GG-NER;Gap-filling DNA repair synthesis and ligation in TC-NER;HDR through MMEJ (alt-NHEJ);Resolution of AP sites via the single-nucleotide replacement pathway	WP_17Q12_COPY_NUMBER_VARIATION_SYNDROME;WP_BASE_EXCISION_REPAIR;WP_DNA_REPAIR_PATHWAYS_FULL_NETWORK;WP_NUCLEOTIDE_EXCISION_REPAIR_IN_XERODERMA_PIGMENTOSUM	-	-	-	+	2.56708	0.00786724	-0.394741	-3.95468	4.46537	0.000143924	P49916	P49916	DNLI3_HUMAN	DNA ligase 3	C (5)		3409	1348
CRK	C1	-1.29384	-0.58011	-1.39845	-0.764918	-0.750574	-1.2192	1.52383	0.629262	0.849566	0.809749	1.49809	0.852007	-0.136138	-1.2188	0.481956	1.1076	0.188446	-0.578482	-	+	STIC_Epithelium PAX8 pos	-	ARMS-mediated activation;Downstream signal transduction;MET activates RAP1 and RAC1;MET receptor recycling;p130Cas linkage to MAPK signaling for integrins;PTK6 Regulates RHO GTPases, RAS GTPase and MAP kinases;Regulation of actin dynamics for phagocytic cup formation;Regulation of signaling by CBL;VEGFA-VEGFR2 Pathway	WP_ANGIOPOIETINLIKE_PROTEIN_8_REGULATORY_PATHWAY;WP_B_CELL_RECEPTOR_SIGNALING_PATHWAY;WP_CHEMOKINE_SIGNALING_PATHWAY;WP_EGFEGFR_SIGNALING_PATHWAY;WP_ERBB_SIGNALING_PATHWAY;WP_FOCAL_ADHESION;WP_GASTRIN_SIGNALING_PATHWAY;WP_HEPATOCYTE_GROWTH_FACTOR_RECEPTOR_SIGNALING;WP_INSULIN_SIGNALING;WP_INTEGRINMEDIATED_CELL_ADHESION;WP_INTERFERON_TYPE_I_SIGNALING_PATHWAYS;WP_KIT_RECEPTOR_SIGNALING_PATHWAY;WP_M…	-	-	-	+	1.77097	0.0330472	-0.401584	-2.86042	4.22081	0.00013564	P46108	P46108	CRK_HUMAN	Adapter molecule crk	C (5)		3410	1265
CDIPT	C1	-1.32944	-0.33941	-1.98173	-0.723496	-1.07109	-1.4969	1.15224	0.784076	0.79105	0.530062	0.814436	0.926077	-0.41922	-0.430377	0.836335	1.16995	0.684783	0.102659	-	-	-	-	Synthesis of PI	WP_16P112_PROXIMAL_DELETION_SYNDROME;WP_GLYCEROLIPIDS_AND_GLYCEROPHOSPHOLIPIDS;WP_GLYCEROPHOSPHOLIPID_BIOSYNTHETIC_PATHWAY	-	-	-	+	0.968748	0.166136	-0.310631	-1.76823	4.57361	3.03e-05	O14735	O14735	CDIPT_HUMAN	CDP-diacylglycerol--inositol 3-phosphatidyltransferase	C (5)		3411	175
SMAD1	C1	-0.581712	-1.76882	-0.573173	-0.562923	-0.996513	-1.40162	0.797254	0.234843	1.85645	0.614378	1.13551	1.19481	-0.0194168	0.0598221	0.957106	-0.680494	0.667243	-0.932755	-	-	-	HALLMARK_TGF_BETA_SIGNALING	RUNX2 regulates bone development;Signaling by BMP;Ub-specific processing proteases	WP_ANGIOGENESIS;WP_BMP_SIGNALING_IN_EYELID_DEVELOPMENT;WP_BMP2WNT4FOXO1_PATHWAY_IN_PRIMARY_ENDOMETRIAL_STROMAL_CELL_DIFFERENTIATION;WP_BONE_MORPHOGENIC_PROTEIN_SIGNALING_AND_REGULATION;WP_CLOCKCONTROLLED_AUTOPHAGY_IN_BONE_METABOLISM;WP_DEVELOPMENT_OF_URETERIC_COLLECTION_SYSTEM;WP_DIFFERENTIATION_OF_WHITE_AND_BROWN_ADIPOCYTE;WP_EMBRYONIC_STEM_CELL_PLURIPOTENCY_PATHWAYS;WP_HAIR_FOLLICLE_DEVELOPMENT…	-	-	-	+	1.54537	0.0509167	-0.325024	-2.55769	3.64224	0.000458248	Q15797	Q15797;Q99717	SMAD1_HUMAN	Mothers against decapentaplegic homolog 1	C (5)		3412	2105
YAP1	C1	-1.1034	-1.71217	-1.23388	-0.943784	-0.735363	-0.903447	0.642258	0.528794	0.930375	1.24404	1.13149	0.652052	1.21564	0.614298	0.131803	-0.440215	1.04041	-1.05889	-	-	-	-	Nuclear signaling by ERBB4;PPARA activates gene expression;RUNX1 regulates transcription of genes involved in differentiation of HSCs;RUNX2 regulates osteoblast differentiation;RUNX3 regulates YAP1-mediated transcription;Signaling by Hippo;YAP1- and WWTR1 (TAZ)-stimulated gene expression	WP_CILIARY_LANDSCAPE;WP_DNA_IRDOUBLE_STRAND_BREAKS_AND_CELLULAR_RESPONSE_VIA_ATM;WP_GALANIN_RECEPTOR_PATHWAY;WP_LEUKOCYTEINTRINSIC_HIPPO_PATHWAY_FUNCTIONS;WP_MALIGNANT_PLEURAL_MESOTHELIOMA;WP_MESODERMAL_COMMITMENT_PATHWAY;WP_MIR5093P_ALTERATION_OF_YAP1ECM_AXIS;WP_NETRINUNC5B_SIGNALING_PATHWAY;WP_RAC1PAK1P38MMP2_PATHWAY;WP_TGFBETA_SIGNALING_PATHWAY	-	-	-	+	0.846673	0.215243	-0.22802	-1.59257	4.04636	0.000191214	P46937	P46937	YAP1_HUMAN	Transcriptional coactivator YAP1	C (5)		3413	1279
HNRNPD	C1	0.269219	-1.3874	-1.70209	-0.376476	-0.410091	-0.848908	0.210012	0.544782	1.23252	0.667865	0.802943	0.580764	0.036792	0.776173	0.38117	-0.273884	1.59711	-2.1005	-	-	-	HALLMARK_E2F_TARGETS;HALLMARK_G2M_CHECKPOINT;HALLMARK_MYC_TARGETS_V1	mRNA Splicing - Major Pathway;Processing of Capped Intron-Containing Pre-mRNA	WP_CIRCADIAN_RHYTHM_GENES;WP_MRNA_PROCESSING	-	-	-	+	0.555086	0.380498	-0.212129	-1.1458	1.43475	0.0214769	Q14103	Q14103	HNRPD_HUMAN	Heterogeneous nuclear ribonucleoprotein D0	C (5)		3414	1939
HNRNPH1	C1	-0.270652	-1.5179	-1.58035	-0.431515	-0.499259	-0.996197	0.163249	0.717439	1.01386	0.698265	0.808993	0.576384	0.439356	0.757628	1.29387	-0.361326	1.13559	-1.94744	Secretory_3	-	-	-	FGFR2 alternative splicing;mRNA Splicing - Major Pathway;Processing of Capped Intron-Containing Pre-mRNA	WP_INHIBITION_OF_EXOSOME_BIOGENESIS_AND_SECRETION_BY_MANUMYCIN_A_IN_CRPC_CELLS;WP_MECP2_AND_ASSOCIATED_RETT_SYNDROME;WP_MRNA_PROCESSING	-	-	-	+	0.39358	0.513491	-0.226944	-0.871275	1.93041	0.00446442	P31943	P31943	HNRH1_HUMAN	Heterogeneous nuclear ribonucleoprotein H	C (5)		3415	1118
HNRNPK	C1	0.190327	-1.59651	-2.28262	-0.0841798	-0.392325	-0.51984	-0.115741	0.249333	1.30645	0.422561	0.955321	0.611505	0.455417	-0.671219	1.17375	-0.153393	1.52267	-1.07151	-	-	-	-	mRNA Splicing - Major Pathway;Processing of Capped Intron-Containing Pre-mRNA;SUMOylation of RNA binding proteins	WP_LNCRNA_IN_CANONICAL_WNT_SIGNALING_AND_COLORECTAL_CANCER;WP_MRNA_PROCESSING	-	-	-	+	0.340943	0.566665	-0.0795403	-0.775315	1.38299	0.048867	P61978	P61978	HNRPK_HUMAN	Heterogeneous nuclear ribonucleoprotein K	C (5)		3416	1549
SNX15	C1	-1.21642	-0.803492	-0.680179	-0.952317	-0.658031	-1.52255	0.686494	0.912665	0.967838	0.954952	0.914976	0.667434	0.851814	0.553722	1.1755	-1.35757	0.737226	-1.23206	-	-	-	-	-	-	-	-	-	+	0.843902	0.216531	-0.755921	-1.58853	2.93772	0.000215881	Q9NRS6	Q9NRS6	SNX15_HUMAN	Sorting nexin-15	C (5)		3417	4057
GANAB	C1	-0.827275	-0.7665	-0.810289	-0.575752	-1.32294	-1.08485	1.43864	0.224188	0.670011	1.10275	0.933634	0.560228	0.700604	0.524685	1.27704	-1.29268	0.740529	-1.49203	-	-	-	-	Calnexin/calreticulin cycle;N-glycan trimming in the ER and Calnexin/Calreticulin cycle	-	+	Disease variant, FDA approved drug targets	11	+	0.762537	0.254696	-0.290614	-1.46828	2.42384	0.0025554	Q14697	Q14697	GANAB_HUMAN	Neutral alpha-glucosidase AB	C (5)		3418	1996
RFC1	C1	-0.426371	-0.350561	-1.08776	-0.73768	-0.665418	-2.21992	0.642417	0.14047	1.03521	1.08182	0.766373	0.488081	0.346648	0.564124	1.60201	-0.996363	0.928948	-1.11203	-	-	-	HALLMARK_E2F_TARGETS;HALLMARK_MITOTIC_SPINDLE	Dual Incision in GG-NER;Dual incision in TC-NER;Gap-filling DNA repair synthesis and ligation in GG-NER;Gap-filling DNA repair synthesis and ligation in TC-NER;HDR through Homologous Recombination (HRR);PCNA-Dependent Long Patch Base Excision Repair;Polymerase switching;Polymerase switching on the C-strand of the telomere;Recognition of DNA damage by PCNA-containing replication complex;Terminatio…	WP_DNA_DAMAGE_RESPONSE;WP_DNA_MISMATCH_REPAIR;WP_DNA_REPAIR_PATHWAYS_FULL_NETWORK;WP_DNA_REPLICATION;WP_EBOLA_VIRUS_INFECTION_IN_HOST;WP_MALE_INFERTILITY;WP_MIRNA_REGULATION_OF_DNA_DAMAGE_RESPONSE;WP_NUCLEOTIDE_EXCISION_REPAIR;WP_NUCLEOTIDE_EXCISION_REPAIR_IN_XERODERMA_PIGMENTOSUM	-	-	-	+	0.476812	0.439891	-0.215241	-1.01602	2.14176	0.00331044	P35251	P35251	RFC1_HUMAN	Replication factor C subunit 1	C (5)		3419	1159
TBC1D15	C1	-0.723406	-0.467217	-1.93912	-0.487512	-0.514473	-1.39156	0.576706	0.543318	0.036545	0.606959	0.675121	0.644758	0.0249979	0.900855	2.10432	-1.21175	1.11342	-0.491972	-	-	-	-	TBC/RABGAPs	-	-	-	-	+	0.0786918	0.887187	-0.0370625	-0.214757	1.95118	0.00774557	Q8TC07	Q8TC07	TBC15_HUMAN	TBC1 domain family member 15	C (5)		3420	3009
RAB21	C1	-1.26431	-1.29856	-0.187928	-0.649041	-1.34124	-1.57312	1.41501	0.472711	0.0984423	0.405558	0.298735	0.459135	-0.0531285	0.810388	2.14117	0.333125	0.647612	-0.714559	-	-	-	-	RAB GEFs exchange GTP for GDP on RABs;RAB geranylgeranylation	WP_CILIARY_LANDSCAPE	-	-	-	+	0.00195156	0.996951	0.000769456	0.00576136	2.87495	0.00197804	Q9UL25	Q9UL25	RAB21_HUMAN	Ras-related protein Rab-21	C (5)		3421	4388
EIF2B1	C1	-0.623656	-0.283915	-1.13698	-0.938211	-1.47805	-1.39989	0.866989	0.727236	1.12465	0.636213	0.0428968	1.11842	-0.731927	1.12603	1.77977	0.21122	-0.0445689	-0.99622	-	-	-	-	Recycling of eIF2:GDP	WP_TRANSLATION_FACTORS	-	-	-	+	0.548274	0.385139	-0.159848	-1.13472	2.63321	0.00301009	Q14232	Q14232	EI2BA_HUMAN	Translation initiation factor eIF-2B subunit alpha	C (5)		3422	1962
ADGRG2	C1	-0.117748	-0.597401	-0.511709	-0.713534	-0.836878	-0.599493	2.12188	-0.347855	0.619392	1.05453	1.28039	0.647466	-1.05416	0.175554	1.07669	-1.26608	0.60293	-1.53397	-	-	-	-	-	-	-	-	-	+	1.28452	0.086869	-1.23133	-2.2057	1.85556	0.00255528	Q8IZP9	Q8IZP9	AGRG2_HUMAN	Adhesion G-protein coupled receptor G2	C (5)		3423	2806
PAM	C1	-1.4077	-0.341943	-1.24325	-0.127935	-1.53599	-0.258298	1.44129	0.208009	0.438838	0.885875	0.886552	0.749469	-0.411127	0.723913	1.02309	-0.655517	1.26631	-1.64159	-	-	-	HALLMARK_GLYCOLYSIS;HALLMARK_HYPOXIA;HALLMARK_PROTEIN_SECRETION	-	-	-	-	-	+	0.749659	0.261043	-0.878113	-1.44897	1.92435	0.00188163	P19021	P19021	AMD_HUMAN	Peptidyl-glycine alpha-amidating monooxygenase	C (5)		3424	922
SPIN1	C1	-0.518009	-0.463475	-0.952791	-0.0597315	-1.04303	-1.64988	0.836496	0.66485	0.884045	0.651826	0.632581	0.620726	-0.0650934	-0.533507	1.52902	-0.0867102	1.4979	-1.94521	-	-	-	-	-	-	-	-	-	+	0.59193	0.355042	-0.336955	-1.20512	1.64968	0.00804614	Q9Y657	Q9Y657	SPIN1_HUMAN	Spindlin-1	C (5)		3425	4626
BICD1	C1	-0.570024	-1.12289	-0.97807	0.72596	-1.36027	-0.711859	0.639175	0.532633	0.583767	0.95176	0.670992	0.750544	0.722831	-1.5001	1.04046	0.911307	0.603495	-1.88972	-	-	-	-	COPI-independent Golgi-to-ER retrograde traffic	-	-	-	-	+	0.658692	0.31205	-0.559124	-1.31016	1.28247	0.013165	Q96G01	Q96G01	BICD1_HUMAN	Protein bicaudal D homolog 1	C (5)		3426	3337
RCN2	C1	-0.641416	-0.679863	-0.632771	-0.497578	-1.03625	-0.952181	1.83961	-0.742941	0.317734	0.234592	0.698678	-0.0902799	0.403805	-0.253038	1.4629	1.11453	1.33212	-1.87766	-	-	-	-	-	-	-	-	-	+	0.00674908	0.990075	-0.00698503	-0.0198162	1.11529	0.0274	Q14257	Q14257	RCN2_HUMAN	Reticulocalbin-2	C (5)		3427	1965
PCP4	C1	-1.2296	-1.26488	-0.681464	0.0472464	-1.09251	-1.45396	1.51706	-0.203148	0.10819	0.389516	1.1624	0.739558	0.183029	-0.00927146	0.843262	0.616538	1.66919	-1.34116	-	-	-	HALLMARK_ESTROGEN_RESPONSE_LATE;HALLMARK_KRAS_SIGNALING_UP	-	-	-	-	-	+	0.248942	0.668173	-0.452987	-0.597103	2.18484	0.000797834	P48539	P48539	PCP4_HUMAN	Calmodulin regulator protein PCP4	C (5)		3428	1296
DHRS1	C1	-0.489777	-0.122895	-1.03016	0.0921766	-1.36797	-0.84918	0.615394	0.600149	0.299689	1.0313	0.853543	0.267755	1.10362	-0.533391	-0.71612	1.1781	1.34394	-2.27617	-	-	-	HALLMARK_XENOBIOTIC_METABOLISM	-	-	-	-	-	+	0.461104	0.452875	-0.249908	-0.989284	1.0303	0.0452349	Q96LJ7	Q96LJ7	DHRS1_HUMAN	Dehydrogenase/reductase SDR family member 1	C (5)		3429	3411
[truncated: 3,863 more rows]
