# Supplementary material for: Spatial proteomics of ovarian cancer precursors delineates early disease changes and drug targets
Source: Mol Syst Biol. 2025 Nov 13;22(1):7–41. doi: 10.1038/s44320-025-00168-4 (PMC12759074; doi:10.1038/s44320-025-00168-4)
Supplement: Supplementary file 14 — Dataset EV8 [file 44320_2025_168_MOESM14_ESM.xlsx]

## Sheet: Legend
Dataset EV 8. Pathway enrichment analysis highlighting overrepresented pathways (Hallmark, Reactome, Wikipathways, cell-type signatures from Dinh et al.) for clusters C1, C2 and C3.

## Sheet: Dataset EV8
Cluster	Category column	Category value	Total size	Selection size	Category size	Intersection size	Enrichment factor	P value	Benj. Hoch. FDR
C1	Reactome pathway	Assembly of the pre-replicative complex	4663	2033	10	10	2.2937	0.00024507	0.0040539
C1	Reactome pathway	Condensation of Prometaphase Chromosomes	4663	2033	7	7	2.2937	0.0029769	0.026175
C1	Reactome pathway	E2F-enabled inhibition of pre-replication complex formation	4663	2033	6	6	2.2937	0.0068395	0.044717
C1	Reactome pathway	HDR through MMEJ (alt-NHEJ)	4663	2033	9	9	2.2937	0.00056351	0.0078151
C1	Reactome pathway	Homologous DNA Pairing and Strand Exchange	4663	2033	6	6	2.2937	0.0068395	0.044717
C1	Reactome pathway	KSRP (KHSRP) binds and destabilizes mRNA	4663	2033	12	12	2.2937	4.6312e-05	0.00097824
C1	Reactome pathway	POLB-Dependent Long Patch Base Excision Repair	4663	2033	7	7	2.2937	0.0029769	0.026175
C1	Reactome pathway	Polo-like kinase mediated events	4663	2033	6	6	2.2937	0.0068395	0.044717
C1	Reactome pathway	Polymerase switching	4663	2033	9	9	2.2937	0.00056351	0.0078151
C1	Reactome pathway	Polymerase switching on the C-strand of the telomere	4663	2033	9	9	2.2937	0.00056351	0.0078151
C1	Reactome pathway	Removal of licensing factors from origins	4663	2033	10	10	2.2937	0.00024507	0.0040539
C1	Reactome pathway	Resolution of D-loop Structures through Holliday Junction Intermediates	4663	2033	6	6	2.2937	0.0068395	0.044717
C1	Reactome pathway	Resolution of D-loop Structures through Synthesis-Dependent Strand Annealing (SDSA)	4663	2033	6	6	2.2937	0.0068395	0.044717
C1	Reactome pathway	RNA Polymerase I Promoter Escape	4663	2033	13	13	2.2937	2.0124e-05	0.00048474
C1	Reactome pathway	RNA Polymerase I Transcription Initiation	4663	2033	26	26	2.2937	3.8626e-10	2.5254e-08
C1	Reactome pathway	RNA Polymerase III Chain Elongation	4663	2033	9	9	2.2937	0.00056351	0.0078151
C1	Reactome pathway	RNA Polymerase III Transcription Initiation From Type 1 Promoter	4663	2033	12	12	2.2937	4.6312e-05	0.00097824
C1	Reactome pathway	RNA Polymerase III Transcription Initiation From Type 2 Promoter	4663	2033	12	12	2.2937	4.6312e-05	0.00097824
C1	Reactome pathway	RNA Polymerase III Transcription Initiation From Type 3 Promoter	4663	2033	10	10	2.2937	0.00024507	0.0040539
C1	Reactome pathway	SeMet incorporation into proteins	4663	2033	7	7	2.2937	0.0029769	0.026175
C1	Reactome pathway	Switching of origins to a post-replicative state	4663	2033	6	6	2.2937	0.0068395	0.044717
C1	Reactome pathway	Unwinding of DNA	4663	2033	8	8	2.2937	0.0012954	0.014821
C1	WikiPathway	WP_EFFECT_OF_PROGERIN_ON_GENES_INVOLVED_IN_HUTCHINSONGILFORD_PROGERIA_SYNDROME	4663	2033	17	17	2.2937	7.1544e-07	6.1796e-05
C1	WikiPathway	WP_SMC1SMC3_ROLE_IN_DNA_DAMAGE_CORNELIA_DE_LANGE_SYNDROME	4663	2033	9	9	2.2937	0.00056351	0.014976
C1	Reactome pathway	Formation of the ternary complex, and subsequently, the 43S complex	4663	2033	44	43	2.2415	6.1117e-15	5.2446e-13
C1	Reactome pathway	Formation of a pool of free 40S subunits	4663	2033	86	84	2.2403	2.3354e-28	5.3442e-26
C1	Reactome pathway	Nonsense Mediated Decay (NMD) independent of the Exon Junction Complex (EJC)	4663	2033	82	80	2.2377	6.4349e-27	1.2622e-24
C1	Reactome pathway	Major pathway of rRNA processing in the nucleolus and cytosol	4663	2033	158	154	2.2356	2.9277e-51	4.0197e-48
C1	WikiPathway	WP_MRNA_PROCESSING	4663	2033	75	73	2.2325	2.0834e-24	1.4396e-21
C1	Reactome pathway	Cleavage of Growing Transcript in the Termination Region	4663	2033	33	32	2.2242	4.739e-11	3.2533e-09
C1	Reactome pathway	L13a-mediated translational silencing of Ceruloplasmin expression	4663	2033	94	91	2.2205	1.2427e-29	5.6873e-27
C1	Reactome pathway	mRNA 3'-end processing	4663	2033	28	27	2.2117	2.6556e-09	1.5853e-07
C1	Reactome pathway	rRNA modification in the nucleus and cytosol	4663	2033	56	54	2.2117	1.1403e-17	1.2043e-15
C1	Reactome pathway	SUMOylation of DNA replication proteins	4663	2033	28	27	2.2117	2.6556e-09	1.5853e-07
C1	Reactome pathway	Eukaryotic Translation Termination	4663	2033	81	78	2.2087	5.2112e-25	8.9436e-23
C1	Reactome pathway	tRNA processing in the nucleus	4663	2033	27	26	2.2087	5.9151e-09	3.2485e-07
C1	Reactome pathway	Peptide chain elongation	4663	2033	78	75	2.2054	5.9716e-24	9.11e-22
C1	Reactome pathway	Translation initiation complex formation	4663	2033	49	47	2.2	3.2004e-15	2.9295e-13
C1	Reactome pathway	GTP hydrolysis and joining of the 60S ribosomal subunit	4663	2033	95	91	2.1971	1.6969e-28	4.6597e-26
C1	Reactome pathway	Nonsense Mediated Decay (NMD) enhanced by the Exon Junction Complex (EJC)	4663	2033	95	91	2.1971	1.6969e-28	4.6597e-26
C1	Hallmark	HALLMARK_MYC_TARGETS_V2	4663	2033	45	43	2.1917	7.8268e-14	1.3306e-12
C1	Reactome pathway	Nuclear import of Rev protein	4663	2033	22	21	2.1894	3.1562e-07	1.3132e-05
C1	Reactome pathway	Rev-mediated nuclear export of HIV RNA	4663	2033	22	21	2.1894	3.1562e-07	1.3132e-05
C1	Reactome pathway	Transport of Mature mRNA derived from an Intron-Containing Transcript	4663	2033	44	42	2.1894	1.7351e-13	1.3235e-11
C1	Reactome pathway	NEP/NS2 Interacts with the Cellular Export Machinery	4663	2033	20	19	2.179	1.5253e-06	5.5113e-05
C1	Reactome pathway	Viral mRNA Translation	4663	2033	78	74	2.176	1.5015e-22	2.0615e-20
C1	Reactome pathway	Transport of Ribonucleoproteins into the Host Nucleus	4663	2033	19	18	2.1729	3.3397e-06	0.00011464
C1	WikiPathway	WP_CYTOPLASMIC_RIBOSOMAL_PROTEINS	4663	2033	76	72	2.1729	7.3912e-22	1.7024e-19
C1	Reactome pathway	Regulation of Glucokinase by Glucokinase Regulatory Protein	4663	2033	18	17	2.1662	7.2899e-06	0.00021759
C1	Reactome pathway	mRNA Splicing - Major Pathway	4663	2033	120	113	2.1599	3.8337e-33	2.6318e-30
C1	Reactome pathway	Generic Transcription Pathway	4663	2033	17	16	2.1587	1.5859e-05	0.00040323
C1	WikiPathway	WP_INTEGRATED_CANCER_PATHWAY	4663	2033	17	16	2.1587	1.5859e-05	0.00073056
C1	Reactome pathway	Ribosomal scanning and start codon recognition	4663	2033	49	46	2.1532	6.6315e-14	5.3559e-12
C1	Reactome pathway	Selenocysteine synthesis	4663	2033	80	75	2.1503	6.1937e-22	7.0866e-20
C1	WikiPathway	WP_TUMOR_SUPPRESSOR_ACTIVITY_OF_SMARCB1	4663	2033	16	15	2.1503	3.4371e-05	0.0013971
C1	Reactome pathway	Cytosolic tRNA aminoacylation	4663	2033	14	13	2.1298	0.00015935	0.0030258
C1	Reactome pathway	Deactivation of the beta-catenin transactivating complex	4663	2033	14	13	2.1298	0.00015935	0.0030258
C1	Reactome pathway	RNA Polymerase I Transcription Termination	4663	2033	14	13	2.1298	0.00015935	0.0030258
C1	Reactome pathway	SUMOylation of RNA binding proteins	4663	2033	28	26	2.1298	4.6961e-08	2.388e-06
C1	Reactome pathway	ATF4 activates genes	4663	2033	13	12	2.1172	0.00034044	0.005252
C1	Reactome pathway	NS1 Mediated Effects on Host Pathways	4663	2033	24	22	2.1025	9.726e-07	3.7094e-05
C1	WikiPathway	WP_NSP1_FROM_SARSCOV2_INHIBITS_TRANSLATION_INITIATION_IN_THE_HOST_CELL	4663	2033	12	11	2.1025	0.00072285	0.0185
C1	Reactome pathway	SRP-dependent cotranslational protein targeting to membrane	4663	2033	91	83	2.092	4.551e-22	5.6805e-20
C1	Reactome pathway	mRNA Splicing - Minor Pathway	4663	2033	33	30	2.0851	1.35e-08	7.1288e-07
C1	Reactome pathway	Transport of Mature mRNA Derived from an Intronless Transcript	4663	2033	21	19	2.0752	9.0688e-06	0.00023945
C1	Reactome pathway	Transport of the SLBP Dependant Mature mRNA	4663	2033	21	19	2.0752	9.0688e-06	0.00023945
C1	Reactome pathway	Transport of the SLBP independent Mature mRNA	4663	2033	21	19	2.0752	9.0688e-06	0.00023945
C1	Reactome pathway	Vpr-mediated nuclear import of PICs	4663	2033	21	19	2.0752	9.0688e-06	0.00023945
C1	Reactome pathway	RUNX1 interacts with co-factors whose precise effect on RUNX1 targets is not known	4663	2033	20	18	2.0643	1.8906e-05	0.00047065
C1	Reactome pathway	RUNX3 regulates YAP1-mediated transcription	4663	2033	10	9	2.0643	0.0031844	0.026906
C1	Reactome pathway	YAP1- and WWTR1 (TAZ)-stimulated gene expression	4663	2033	10	9	2.0643	0.0031844	0.026906
C1	Cluster	Secretory_1	4663	2033	98	88	2.0596	3.4782e-22	3.826e-21
C1	Reactome pathway	Viral Messenger RNA Synthesis	4663	2033	28	25	2.0479	5.3266e-07	2.151e-05
C1	Hallmark	HALLMARK_E2F_TARGETS	4663	2033	118	105	2.041	1.5934e-25	8.1264e-24
C1	WikiPathway	WP_DNA_IRDOUBLE_STRAND_BREAKS_AND_CELLULAR_RESPONSE_VIA_ATM	4663	2033	27	24	2.0388	1.0975e-06	8.4261e-05
C1	Reactome pathway	FGFR2 alternative splicing	4663	2033	17	15	2.0238	0.00016528	0.0030258
C1	Reactome pathway	RNA polymerase II transcribes snRNA genes	4663	2033	34	30	2.0238	6.5106e-08	3.1925e-06
C1	Reactome pathway	RNA Polymerase III Abortive And Retractive Initiation	4663	2033	17	15	2.0238	0.00016528	0.0030258
C1	Reactome pathway	Processing of Capped Intron-Containing Pre-mRNA	4663	2033	25	22	2.0184	4.5915e-06	0.0001501
C1	Reactome pathway	snRNP Assembly	4663	2033	33	29	2.0156	1.3272e-07	6.2837e-06
C1	Reactome pathway	Regulation of TP53 Activity through Acetylation	4663	2033	16	14	2.0069	0.00033567	0.0052372
C1	Reactome pathway	SUMOylation of chromatin organization proteins	4663	2033	32	28	2.0069	2.6939e-07	1.2329e-05
C1	Reactome pathway	Transcriptional Regulation by E2F6	4663	2033	16	14	2.0069	0.00033567	0.0052372
C1	WikiPathway	WP_DNA_REPLICATION	4663	2033	23	20	1.9945	1.879e-05	0.00081147
C1	Reactome pathway	Nuclear Pore Complex (NPC) Disassembly	4663	2033	22	19	1.9809	3.765e-05	0.00084744
C1	Reactome pathway	Activation of ATR in response to replication stress	4663	2033	21	18	1.966	7.4909e-05	0.0015351
C1	Reactome pathway	Deadenylation of mRNA	4663	2033	14	12	1.966	0.0013473	0.014919
C1	Reactome pathway	mRNA Capping	4663	2033	14	12	1.966	0.0013473	0.014919
C1	Reactome pathway	RNA Pol II CTD phosphorylation and interaction with CE	4663	2033	14	12	1.966	0.0013473	0.014919
C1	Reactome pathway	RNA Pol II CTD phosphorylation and interaction with CE during HIV infection	4663	2033	14	12	1.966	0.0013473	0.014919
C1	Reactome pathway	Formation of RNA Pol II elongation complex	4663	2033	27	23	1.9539	8.6061e-06	0.00023945
C1	Reactome pathway	RNA Polymerase II Transcription Elongation	4663	2033	27	23	1.9539	8.6061e-06	0.00023945
C1	Reactome pathway	Butyrate Response Factor 1 (BRF1) binds and destabilizes mRNA	4663	2033	13	11	1.9408	0.0026558	0.025254
C1	Reactome pathway	Cytosolic sensors of pathogen-associated DNA	4663	2033	13	11	1.9408	0.0026558	0.025254
C1	Reactome pathway	RNA Polymerase III Transcription Termination	4663	2033	13	11	1.9408	0.0026558	0.025254
C1	WikiPathway	WP_HEMATOPOIETIC_STEM_CELL_GENE_REGULATION_BY_GABP_ALPHABETA_COMPLEX	4663	2033	13	11	1.9408	0.0026558	0.043568
C1	Reactome pathway	TP53 Regulates Transcription of DNA Repair Genes	4663	2033	31	26	1.9237	3.8457e-06	0.00012878
C1	Reactome pathway	Tristetraprolin (TTP, ZFP36) binds and destabilizes mRNA	4663	2033	12	10	1.9114	0.0051666	0.037733
C1	Reactome pathway	RNA Polymerase II Pre-transcription Events	4663	2033	33	27	1.8766	6.1568e-06	0.00018785
C1	Reactome pathway	Transcription-Coupled Nucleotide Excision Repair (TC-NER)	4663	2033	22	18	1.8766	0.00023316	0.0040483
C1	Reactome pathway	Activation of the pre-replicative complex	4663	2033	16	13	1.8636	0.0020379	0.019845
C1	Reactome pathway	E3 ubiquitin ligases ubiquitinate target proteins	4663	2033	16	13	1.8636	0.0020379	0.019845
C1	Reactome pathway	HDR through Homologous Recombination (HRR)	4663	2033	16	13	1.8636	0.0020379	0.019845
C1	Reactome pathway	Presynaptic phase of homologous DNA pairing and strand exchange	4663	2033	16	13	1.8636	0.0020379	0.019845
C1	Cluster	Unclassified_3	4663	2033	116	94	1.8587	5.272e-17	1.9331e-16
C1	Reactome pathway	Formation of HIV elongation complex in the absence of HIV Tat	4663	2033	21	17	1.8568	0.00043925	0.0064849
C1	Reactome pathway	SUMOylation of DNA damage response and repair proteins	4663	2033	42	34	1.8568	6.0208e-07	2.3619e-05
C1	Reactome pathway	NoRC negatively regulates rRNA expression	4663	2033	31	25	1.8497	2.1785e-05	0.00051571
C1	Hallmark	HALLMARK_MYC_TARGETS_V1	4663	2033	143	115	1.8445	4.7477e-20	1.2107e-18
C1	Reactome pathway	Formation of HIV-1 elongation complex containing HIV-1 Tat	4663	2033	20	16	1.8349	0.00081853	0.010125
C1	Reactome pathway	Formation of the Early Elongation Complex	4663	2033	15	12	1.8349	0.0038082	0.031309
C1	Reactome pathway	Formation of the HIV-1 Early Elongation Complex	4663	2033	15	12	1.8349	0.0038082	0.031309
C1	Reactome pathway	HIV elongation arrest and recovery	4663	2033	20	16	1.8349	0.00081853	0.010125
C1	Reactome pathway	Pausing and recovery of HIV elongation	4663	2033	20	16	1.8349	0.00081853	0.010125
C1	Reactome pathway	Tat-mediated elongation of the HIV-1 transcript	4663	2033	20	16	1.8349	0.00081853	0.010125
C1	WikiPathway	WP_EUKARYOTIC_TRANSCRIPTION_INITIATION	4663	2033	20	16	1.8349	0.00081853	0.019504
C1	WikiPathway	WP_TRANSLATION_FACTORS	4663	2033	35	28	1.8349	9.1807e-06	0.00048799
C1	Reactome pathway	Regulation of expression of SLITs and ROBOs	4663	2033	116	92	1.8191	1.5075e-15	1.4785e-13
C1	Reactome pathway	B-WICH complex positively regulates rRNA expression	4663	2033	24	19	1.8158	0.00033289	0.0052372
C1	Reactome pathway	Pausing and recovery of Tat-mediated HIV elongation	4663	2033	19	15	1.8108	0.0015069	0.016155
C1	Reactome pathway	Tat-mediated HIV elongation arrest and recovery	4663	2033	19	15	1.8108	0.0015069	0.016155
C1	Reactome pathway	Gap-filling DNA repair synthesis and ligation in TC-NER	4663	2033	33	26	1.8071	3.1048e-05	0.00072253
C1	Reactome pathway	Abortive elongation of HIV-1 transcript in the absence of Tat	4663	2033	14	11	1.8022	0.0070046	0.04558
C1	Hallmark	HALLMARK_G2M_CHECKPOINT	4663	2033	102	80	1.7989	3.3463e-13	4.2666e-12
C1	Reactome pathway	RMTs methylate histone arginines	4663	2033	23	18	1.795	0.00060686	0.0083322
C1	WikiPathway	WP_GASTRIC_CANCER_NETWORK_2	4663	2033	18	14	1.784	0.0027371	0.043568
C1	WikiPathway	WP_RETINOBLASTOMA_GENE_IN_CANCER	4663	2033	45	35	1.784	2.2671e-06	0.00014241
C1	Reactome pathway	Dual incision in TC-NER	4663	2033	31	24	1.7757	0.00010162	0.0020519
C1	Cluster	Secretory_3	4663	2033	57	44	1.7705	1.6796e-07	3.0793e-07
C1	WikiPathway	WP_DNA_IRDAMAGE_AND_CELLULAR_RESPONSE_VIA_ATR	4663	2033	35	27	1.7694	4.2016e-05	0.0016129
C1	WikiPathway	WP_CELL_CYCLE	4663	2033	52	40	1.7643	7.1508e-07	6.1796e-05
C1	Reactome pathway	Regulation of TP53 Activity through Phosphorylation	4663	2033	30	23	1.7585	0.00018134	0.0031921
C1	Reactome pathway	Transcriptional regulation of white adipocyte differentiation	4663	2033	30	23	1.7585	0.00018134	0.0031921
C1	Reactome pathway	HDR through Single Strand Annealing (SSA)	4663	2033	17	13	1.754	0.0048963	0.036143
C1	Reactome pathway	HIV Transcription Initiation	4663	2033	17	13	1.754	0.0048963	0.036143
C1	Reactome pathway	RNA Polymerase II HIV Promoter Escape	4663	2033	17	13	1.754	0.0048963	0.036143
C1	Reactome pathway	RNA Polymerase II Promoter Escape	4663	2033	17	13	1.754	0.0048963	0.036143
C1	Reactome pathway	RNA Polymerase II Transcription Initiation	4663	2033	17	13	1.754	0.0048963	0.036143
C1	Reactome pathway	RNA Polymerase II Transcription Initiation And Promoter Clearance	4663	2033	17	13	1.754	0.0048963	0.036143
C1	Reactome pathway	RNA Polymerase II Transcription Pre-Initiation And Promoter Opening	4663	2033	17	13	1.754	0.0048963	0.036143
C1	Reactome pathway	Transcription of the HIV genome	4663	2033	17	13	1.754	0.0048963	0.036143
C1	WikiPathway	WP_G1_TO_S_CELL_CYCLE_CONTROL	4663	2033	29	22	1.74	0.00032037	0.0096251
C1	Hallmark	HALLMARK_UNFOLDED_PROTEIN_RESPONSE	4663	2033	59	44	1.7105	8.834e-07	9.0107e-06
C1	Reactome pathway	Transcriptional regulation by small RNAs	4663	2033	35	26	1.7039	0.00016467	0.0030258
C1	Reactome pathway	Activation of gene expression by SREBF (SREBP)	4663	2033	19	14	1.6901	0.00588	0.041119
C1	Reactome pathway	ERCC6 (CSB) and EHMT2 (G9a) positively regulate rRNA expression	4663	2033	19	14	1.6901	0.00588	0.041119
C1	Reactome pathway	RNA Polymerase I Chain Elongation	4663	2033	19	14	1.6901	0.00588	0.041119
C1	Reactome pathway	ISG15 antiviral mechanism	4663	2033	40	29	1.6629	0.00014108	0.0028072
C1	Reactome pathway	PKMTs methylate histone lysines	4663	2033	25	18	1.6514	0.0027742	0.025912
C1	WikiPathway	WP_PATHWAYS_AFFECTED_IN_ADENOID_CYSTIC_CARCINOMA	4663	2033	25	18	1.6514	0.0027742	0.043568
C1	Reactome pathway	PPARA activates gene expression	4663	2033	39	28	1.6467	0.00023588	0.0040483
C1	Reactome pathway	G2/M DNA damage checkpoint	4663	2033	28	20	1.6383	0.0019151	0.019334
C1	Reactome pathway	Processing of DNA double-strand break ends	4663	2033	28	20	1.6383	0.0019151	0.019334
C1	Reactome pathway	Regulation of PTEN gene transcription	4663	2033	35	25	1.6383	0.00055885	0.0078151
C1	Reactome pathway	Activation of anterior HOX genes in hindbrain development during early embryogenesis	4663	2033	36	25	1.5928	0.0010354	0.012151
C1	Reactome pathway	HATs acetylate histones	4663	2033	39	27	1.5879	0.00071858	0.0095787
C1	Reactome pathway	HDACs deacetylate histones	4663	2033	26	18	1.5879	0.0050991	0.037439
C1	WikiPathway	WP_7Q1123_COPY_NUMBER_VARIATION_SYNDROME	4663	2033	45	31	1.5801	0.00034809	0.010022
C1	Hallmark	HALLMARK_ALLOGRAFT_REJECTION	4663	2033	34	23	1.5516	0.0026158	0.0086131
C1	Reactome pathway	Mitochondrial protein import	4663	2033	33	22	1.5291	0.0040739	0.032332
C1	WikiPathway	WP_PYRIMIDINE_METABOLISM	4663	2033	41	27	1.5105	0.0020753	0.03585
C1	Reactome pathway	Amplification of signal from unattached kinetochores via a MAD2 inhibitory signal	4663	2033	46	30	1.4959	0.0015296	0.016155
C1	WikiPathway	WP_DNA_REPAIR_PATHWAYS_FULL_NETWORK	4663	2033	46	30	1.4959	0.0015296	0.032028
C1	WikiPathway	WP_CIRCADIAN_RHYTHM_GENES	4663	2033	53	34	1.4714	0.001181	0.026377
C1	Cluster	Secretory_2	4663	2033	33	21	1.4596	0.0097222	0.011883
C1	Hallmark	HALLMARK_DNA_REPAIR	4663	2033	68	43	1.4504	0.00046931	0.0021759
C1	Reactome pathway	Resolution of Sister Chromatid Cohesion	4663	2033	62	39	1.4428	0.00093455	0.011457
C1	Hallmark	HALLMARK_UV_RESPONSE_UP	4663	2033	61	37	1.3912	0.0028043	0.0086131
C1	Reactome pathway	RHO GTPases Activate Formins	4663	2033	62	36	1.3318	0.0073108	0.047348
C1	Hallmark	HALLMARK_MTORC1_SIGNALING	4663	2033	99	55	1.2743	0.0044391	0.012577
C1	WikiPathway	WP_VEGFAVEGFR2_SIGNALING	4663	2033	209	108	1.1852	0.003185	0.048908
C2	Reactome pathway	Ion channel transport	4663	1211	6	6	3.8505	0.00030401	0.0081843
C2	WikiPathway	WP_GENES_RELATED_TO_PRIMARY_CILIUM_DEVELOPMENT_BASED_ON_CRISPR	4663	1211	69	65	3.6273	6.528e-34	2.2554e-31
C2	Reactome pathway	Hedgehog 'off' state	4663	1211	24	22	3.5297	1.74e-11	1.8377e-09
C2	Reactome pathway	Transferrin endocytosis and recycling	4663	1211	7	6	3.3005	0.0015774	0.024335
C2	Reactome pathway	Insulin receptor recycling	4663	1211	7	6	3.3005	0.0015774	0.024335
C2	WikiPathway	WP_CILIOPATHIES	4663	1211	102	87	3.2843	5.478e-37	3.7853e-34
C2	Reactome pathway	BBSome-mediated cargo-targeting to cilium	4663	1211	11	9	3.1504	0.00015905	0.0050786
C2	WikiPathway	WP_INTRAFLAGELLAR_TRANSPORT_PROTEINS_BINDING_TO_DYNEIN	4663	1211	20	16	3.0804	5.8657e-07	5.7903e-05
C2	WikiPathway	WP_JOUBERT_SYNDROME	4663	1211	49	38	2.9861	4.2297e-14	7.3068e-12
C2	Reactome pathway	Anchoring of the basal body to the plasma membrane	4663	1211	64	43	2.5871	3.3766e-12	5.1512e-10
C2	Reactome pathway	Mitochondrial translation termination	4663	1211	12	8	2.567	0.0030436	0.036981
C2	Reactome pathway	G alpha (i) signalling events	4663	1211	17	11	2.4915	0.00072325	0.013419
C2	Reactome pathway	HSP90 chaperone cycle for steroid hormone receptors (SHR)	4663	1211	30	19	2.4387	1.406e-05	0.00068946
C2	Reactome pathway	Loss of Nlp from mitotic centrosomes	4663	1211	43	25	2.2387	5.6517e-06	0.00029846
C2	Reactome pathway	Loss of proteins required for interphase microtubule organization from the centrosome	4663	1211	43	25	2.2387	5.6517e-06	0.00029846
C2	Cluster	Ciliated_2	4663	1211	33	19	2.217	8.6326e-05	0.0001187
C2	Reactome pathway	Recruitment of mitotic centrosome proteins and complexes	4663	1211	51	29	2.1895	1.9206e-06	0.00010988
C2	Reactome pathway	Recruitment of NuMA to mitotic centrosomes	4663	1211	57	32	2.1617	8.4597e-07	5.531e-05
C2	Reactome pathway	Kinesins	4663	1211	30	16	2.0536	0.00089512	0.016387
C2	WikiPathway	WP_BARDETBIEDL_SYNDROME	4663	1211	45	38	3.2516	2.1281e-16	4.9017e-14
C2	Hallmark	HALLMARK_SPERMATOGENESIS	4663	1211	32	17	2.0456	0.00066665	0.0056665
C2	Reactome pathway	Regulation of PLK1 Activity at G2/M Transition	4663	1211	49	26	2.0431	3.1579e-05	0.0013549
C2	Reactome pathway	AURKA Activation by TPX2	4663	1211	44	25	2.1878	9.7283e-06	0.0004947
C2	Reactome pathway	Activation of SMO	4663	1211	8	7	3.3692	0.00046656	0.011397
C2	Reactome pathway	Intraflagellar transport	4663	1211	39	35	3.4556	5.6563e-17	2.5887e-14
C2	Reactome pathway	COPI-dependent Golgi-to-ER retrograde traffic	4663	1211	43	20	1.7909	0.001788	0.025051
C2	Reactome pathway	MHC class II antigen presentation	4663	1211	53	23	1.671	0.0024694	0.031105
C3	Reactome pathway	Extracellular matrix organization	4663	1419	10	10	3.2861	6.6613e-06	0.00012882
C3	Reactome pathway	NCAM1 interactions	4663	1419	11	11	3.2861	2.0172e-06	4.6159e-05
C3	Reactome pathway	Crosslinking of collagen fibrils	4663	1419	7	7	3.2861	0.00023919	0.0037319
C3	Reactome pathway	Scavenging by Class A Receptors	4663	1419	5	5	3.2861	0.0025969	0.034617
C3	WikiPathway	WP_GABA_RECEPTOR_SIGNALING	4663	1419	5	5	3.2861	0.0025969	0.04986
C3	WikiPathway	WP_INFLAMMATORY_RESPONSE_PATHWAY	4663	1419	6	6	3.2861	0.00078832	0.025939
C3	WikiPathway	WP_EXTRACELLULAR_VESICLES_IN_THE_CROSSTALK_OF_CARDIAC_CELLS	4663	1419	7	7	3.2861	0.00023919	0.011019
C3	WikiPathway	WP_ARSENIC_METABOLISM_AND_REACTIVE_OXYGEN_SPECIES_GENERATION	4663	1419	5	5	3.2861	0.0025969	0.04986
C3	Reactome pathway	Collagen chain trimerization	4663	1419	18	17	3.1036	1.9345e-08	1.3979e-06
C3	Reactome pathway	Assembly of collagen fibrils and other multimeric structures	4663	1419	24	22	3.0123	5.1674e-10	6.4498e-08
C3	Reactome pathway	Signaling by PDGF	4663	1419	12	11	3.0123	1.688e-05	0.00030901
C3	Reactome pathway	Non-integrin membrane-ECM interactions	4663	1419	21	19	2.9732	1.4354e-08	1.0949e-06
C3	WikiPathway	WP_OXIDATIVE_PHOSPHORYLATION	4663	1419	21	19	2.9732	1.4354e-08	1.9837e-06
C3	Reactome pathway	Anchoring fibril formation	4663	1419	10	9	2.9575	0.00015326	0.0024756
C3	Reactome pathway	Laminin interactions	4663	1419	18	16	2.921	3.8007e-07	1.1103e-05
C3	WikiPathway	WP_ELECTRON_TRANSPORT_CHAIN_OXPHOS_SYSTEM_IN_MITOCHONDRIA	4663	1419	35	31	2.9106	9.6137e-13	6.6431e-10
C3	WikiPathway	WP_PROTEASOME_DEGRADATION	4663	1419	26	23	2.9069	1.0247e-09	1.7701e-07
C3	Reactome pathway	Hh mutants that don't undergo autocatalytic processing are degraded by ERAD	4663	1419	25	22	2.8918	3.0094e-09	2.7546e-07
C3	Reactome pathway	Hedgehog ligand biogenesis	4663	1419	25	22	2.8918	3.0094e-09	2.7546e-07
C3	Reactome pathway	Asymmetric localization of PCP proteins	4663	1419	24	21	2.8754	8.7877e-09	7.541e-07
C3	WikiPathway	WP_GENES_CONTROLLING_NEPHROGENESIS	4663	1419	8	7	2.8754	0.0013332	0.031767
C3	Reactome pathway	Cross-presentation of soluble exogenous antigens (endosomes)	4663	1419	23	20	2.8575	2.5503e-08	1.5916e-06
C3	Reactome pathway	Regulation of activated PAK-2p34 by proteasome mediated degradation	4663	1419	23	20	2.8575	2.5503e-08	1.5916e-06
C3	Reactome pathway	Degradation of AXIN	4663	1419	23	20	2.8575	2.5503e-08	1.5916e-06
C3	Reactome pathway	Respiratory electron transport	4663	1419	38	33	2.8537	5.8031e-13	2.6559e-10
C3	Reactome pathway	Defective CFTR causes cystic fibrosis	4663	1419	28	24	2.8167	1.6983e-09	1.9432e-07
C3	Reactome pathway	Collagen degradation	4663	1419	21	18	2.8167	2.1036e-07	7.0446e-06
C3	Reactome pathway	Asparagine N-linked glycosylation	4663	1419	7	6	2.8167	0.0038439	0.044726
C3	Reactome pathway	ECM proteoglycans	4663	1419	26	22	2.7806	1.3669e-08	1.0949e-06
C3	Reactome pathway	Amyloid fiber formation	4663	1419	13	11	2.7806	7.6502e-05	0.0013143
C3	WikiPathway	WP_MIRNA_TARGETS_IN_ECM_AND_MEMBRANE_RECEPTORS	4663	1419	13	11	2.7806	7.6502e-05	0.0037759
C3	Reactome pathway	Vif-mediated degradation of APOBEC3G	4663	1419	25	21	2.7603	3.8372e-08	2.1952e-06
C3	Reactome pathway	Degradation of DVL	4663	1419	24	20	2.7384	1.0688e-07	4.4469e-06
C3	Reactome pathway	Ubiquitin-dependent degradation of Cyclin D1	4663	1419	24	20	2.7384	1.0688e-07	4.4469e-06
C3	Reactome pathway	G2/M Checkpoints	4663	1419	24	20	2.7384	1.0688e-07	4.4469e-06
C3	Reactome pathway	MET activates PTK2 signaling	4663	1419	12	10	2.7384	0.00021368	0.0033722
C3	Reactome pathway	Regulation of ornithine decarboxylase (ODC)	4663	1419	24	20	2.7384	1.0688e-07	4.4469e-06
C3	Reactome pathway	Regulation of RUNX3 expression and activity	4663	1419	24	20	2.7384	1.0688e-07	4.4469e-06
C3	Reactome pathway	CDK-mediated phosphorylation and removal of Cdc6	4663	1419	24	20	2.7384	1.0688e-07	4.4469e-06
C3	Reactome pathway	Vpu mediated degradation of CD4	4663	1419	24	20	2.7384	1.0688e-07	4.4469e-06
C3	WikiPathway	WP_EICOSANOID_SYNTHESIS	4663	1419	11	9	2.6886	0.00058749	0.022553
C3	Reactome pathway	Autodegradation of Cdh1 by Cdh1:APC/C	4663	1419	27	22	2.6776	5.1575e-08	2.8325e-06
C3	Reactome pathway	Oxygen-dependent proline hydroxylation of Hypoxia-inducible Factor Alpha	4663	1419	26	21	2.6542	1.3939e-07	5.468e-06
C3	Reactome pathway	Hedgehog 'on' state	4663	1419	26	21	2.6542	1.3939e-07	5.468e-06
C3	Reactome pathway	SCF-beta-TrCP mediated degradation of Emi1	4663	1419	25	20	2.6289	3.7324e-07	1.1103e-05
C3	Reactome pathway	Regulation of Complement cascade	4663	1419	10	8	2.6289	0.0015851	0.021763
C3	Reactome pathway	Autodegradation of the E3 ubiquitin ligase COP1	4663	1419	25	20	2.6289	3.7324e-07	1.1103e-05
C3	Reactome pathway	TNFR2 non-canonical NF-kB pathway	4663	1419	25	20	2.6289	3.7324e-07	1.1103e-05
C3	Reactome pathway	Ubiquitin Mediated Degradation of Phosphorylated Cdc25A	4663	1419	25	20	2.6289	3.7324e-07	1.1103e-05
C3	WikiPathway	WP_FIBRIN_COMPLEMENT_RECEPTOR_3_SIGNALING_PATHWAY	4663	1419	10	8	2.6289	0.0015851	0.035332
C3	Reactome pathway	Dectin-1 mediated noncanonical NF-kB signaling	4663	1419	28	22	2.5819	1.6816e-07	5.772e-06
C3	Reactome pathway	AUF1 (hnRNP D0) binds and destabilizes mRNA	4663	1419	28	22	2.5819	1.6816e-07	5.772e-06
C3	Reactome pathway	APC/C:Cdc20 mediated degradation of Securin	4663	1419	28	22	2.5819	1.6816e-07	5.772e-06
C3	Reactome pathway	APC/C:Cdh1 mediated degradation of Cdc20 and other APC/C:Cdh1 targeted proteins in late mitosis/early G1	4663	1419	28	22	2.5819	1.6816e-07	5.772e-06
C3	Reactome pathway	Synthesis of Prostaglandins (PG) and Thromboxanes (TX)	4663	1419	9	7	2.5559	0.0041796	0.048224
C3	Reactome pathway	Regulation of PTEN stability and activity	4663	1419	27	21	2.5559	4.3814e-07	1.1795e-05
C3	Reactome pathway	NIK-->noncanonical NF-kB signaling	4663	1419	27	21	2.5559	4.3814e-07	1.1795e-05
C3	Reactome pathway	SCF(Skp2)-mediated degradation of p27/p21	4663	1419	26	20	2.5278	1.1295e-06	2.7693e-05
C3	Reactome pathway	FBXL7 down-regulates AURKA during mitotic entry and in early mitosis	4663	1419	26	20	2.5278	1.1295e-06	2.7693e-05
C3	Reactome pathway	RUNX1 regulates transcription of genes involved in differentiation of HSCs	4663	1419	34	26	2.5129	3.2594e-08	1.9457e-06
C3	Reactome pathway	Complex I biogenesis	4663	1419	25	19	2.4974	2.8784e-06	6.2731e-05
C3	WikiPathway	WP_NONALCOHOLIC_FATTY_LIVER_DISEASE	4663	1419	54	41	2.495	4.8079e-12	1.6611e-09
C3	Reactome pathway	Integrin cell surface interactions	4663	1419	29	22	2.4929	4.8668e-07	1.2608e-05
C3	Reactome pathway	ER-Phagosome pathway	4663	1419	29	22	2.4929	4.8668e-07	1.2608e-05
C3	Hallmark	HALLMARK_ANGIOGENESIS	4663	1419	8	6	2.4646	0.01071	0.023747
C3	Reactome pathway	Degradation of GLI1 by the proteasome	4663	1419	28	21	2.4646	1.2241e-06	2.9485e-05
C3	WikiPathway	WP_LEUCINE_ISOLEUCINE_AND_VALINE_METABOLISM	4663	1419	16	12	2.4646	0.00026283	0.011351
C3	Reactome pathway	Activation of NF-kappaB in B cells	4663	1419	31	23	2.4381	5.1812e-07	1.3174e-05
C3	Reactome pathway	CDT1 association with the CDC6:ORC:origin complex	4663	1419	27	20	2.4342	3.0423e-06	6.4467e-05
C3	Reactome pathway	Cdc20:Phospho-APC/C mediated degradation of Cyclin A	4663	1419	30	22	2.4098	1.2749e-06	2.9667e-05
C3	Reactome pathway	Regulation of RAS by GAPs	4663	1419	29	21	2.3796	3.0989e-06	6.4467e-05
C3	Reactome pathway	Interleukin-1 signaling	4663	1419	36	26	2.3733	2.2298e-07	7.2895e-06
C3	Reactome pathway	Regulation of RUNX2 expression and activity	4663	1419	31	22	2.3321	3.0671e-06	6.4467e-05
C3	WikiPathway	WP_MITOCHONDRIAL_COMPLEX_I_ASSEMBLY_MODEL_OXPHOS_SYSTEM	4663	1419	24	17	2.3277	4.3018e-05	0.0022866
C3	Reactome pathway	FCERI mediated NF-kB activation	4663	1419	34	24	2.3196	1.2672e-06	2.9667e-05
C3	WikiPathway	WP_MITOCHONDRIAL_COMPLEX_IV_ASSEMBLY	4663	1419	17	12	2.3196	0.00062304	0.022659
C3	Reactome pathway	Degradation of beta-catenin by the destruction complex	4663	1419	30	21	2.3003	7.2134e-06	0.00013756
C3	Reactome pathway	Degradation of GLI2 by the proteasome	4663	1419	29	20	2.2663	1.6725e-05	0.00030901
C3	Reactome pathway	GLI3 is processed to GLI3R by the proteasome	4663	1419	29	20	2.2663	1.6725e-05	0.00030901
C3	Reactome pathway	ABC-family proteins mediated transport	4663	1419	35	24	2.2533	2.817e-06	6.2383e-05
C3	Reactome pathway	Downstream TCR signaling	4663	1419	34	23	2.223	6.4052e-06	0.00012563
C3	Hallmark	HALLMARK_INTERFERON_ALPHA_RESPONSE	4663	1419	30	20	2.1907	3.5028e-05	0.00044661
C3	Reactome pathway	Syndecan interactions	4663	1419	15	10	2.1907	0.0032919	0.039647
C3	Reactome pathway	MAPK6/MAPK4 signaling	4663	1419	36	24	2.1907	5.9037e-06	0.00011747
C3	WikiPathway	WP_AMPACTIVATED_PROTEIN_KINASE_SIGNALING	4663	1419	18	12	2.1907	0.0013031	0.031767
C3	Reactome pathway	Collagen biosynthesis and modifying enzymes	4663	1419	29	19	2.153	7.7295e-05	0.0013143
C3	Reactome pathway	PI5P, PP2A and IER3 Regulate PI3K/AKT Signaling	4663	1419	17	11	2.1263	0.0028665	0.03578
C3	Reactome pathway	RHO GTPases Activate WASPs and WAVEs	4663	1419	17	11	2.1263	0.0028665	0.03578
C3	Hallmark	HALLMARK_COAGULATION	4663	1419	31	20	2.1201	6.8907e-05	0.00050204
C3	Reactome pathway	CLEC7A (Dectin-1) signaling	4663	1419	36	23	2.0995	2.5233e-05	0.00044994
C3	Cluster	Unclassified _1	4663	1419	66	42	2.0912	1.623e-08	1.7854e-07
C3	Reactome pathway	Degradation of the extracellular matrix	4663	1419	22	14	2.0912	0.001001	0.014025
C3	Reactome pathway	Neddylation	4663	1419	63	39	2.0343	1.5104e-07	5.7604e-06
C3	Reactome pathway	The role of GTSE1 in G2/M progression after G2 checkpoint	4663	1419	36	22	2.0082	9.5877e-05	0.001586
C3	WikiPathway	WP_REGULATION_OF_ACTIN_CYTOSKELETON	4663	1419	43	26	1.987	3.0048e-05	0.0017303
C3	Reactome pathway	Regulation of actin dynamics for phagocytic cup formation	4663	1419	30	18	1.9717	0.00053753	0.0078514
C3	Hallmark	HALLMARK_KRAS_SIGNALING_UP	4663	1419	32	19	1.9511	0.00045551	0.0019359
C3	WikiPathway	WP_MICRORNAS_IN_CARDIOMYOCYTE_HYPERTROPHY	4663	1419	27	16	1.9473	0.0012687	0.031767
C3	WikiPathway	WP_SELENIUM_MICRONUTRIENT_NETWORK	4663	1419	29	17	1.9263	0.001066	0.030693
C3	WikiPathway	WP_COMPLEMENT_SYSTEM_IN_NEURONAL_DEVELOPMENT_AND_PLASTICITY	4663	1419	29	17	1.9263	0.001066	0.030693
C3	WikiPathway	WP_PI3KAKT_SIGNALING_PATHWAY	4663	1419	77	45	1.9205	1.8693e-07	1.8453e-05
C3	Reactome pathway	UCH proteinases	4663	1419	36	21	1.9169	0.0003249	0.0050121
C3	Reactome pathway	DNA Damage Recognition in GG-NER	4663	1419	24	14	1.9169	0.0029847	0.036919
C3	WikiPathway	WP_FOCAL_ADHESION_PI3KAKTMTORSIGNALING_PATHWAY	4663	1419	74	43	1.9095	4.2871e-07	3.2916e-05
C3	WikiPathway	WP_FOCAL_ADHESION	4663	1419	64	37	1.8998	3.1013e-06	0.0002143
C3	Reactome pathway	Orc1 removal from chromatin	4663	1419	35	20	1.8778	0.00062695	0.0090611
C3	WikiPathway	WP_AGERAGE_PATHWAY	4663	1419	32	18	1.8484	0.0014257	0.032838
C3	Reactome pathway	Antigen processing: Ubiquitination & Proteasome degradation	4663	1419	76	42	1.816	3.3452e-06	6.8551e-05
C3	WikiPathway	WP_PRIMARY_FOCAL_SEGMENTAL_GLOMERULOSCLEROSIS_FSGS	4663	1419	31	17	1.8021	0.0026495	0.04986
C3	WikiPathway	WP_RAS_SIGNALING	4663	1419	45	24	1.7526	0.00070223	0.024262
C3	Hallmark	HALLMARK_COMPLEMENT	4663	1419	51	27	1.7397	0.00040043	0.0019359
C3	WikiPathway	WP_INTEGRINMEDIATED_CELL_ADHESION	4663	1419	36	19	1.7343	0.0026698	0.04986
C3	Hallmark	HALLMARK_REACTIVE_OXIGEN_SPECIES_PATHWAY	4663	1419	23	12	1.7145	0.015608	0.031841
C3	Hallmark	HALLMARK_EPITHELIAL_MESENCHYMAL_TRANSITION	4663	1419	71	37	1.7125	6.27e-05	0.00050204
C3	Hallmark	HALLMARK_XENOBIOTIC_METABOLISM	4663	1419	73	38	1.7106	5.214e-05	0.00050204
C3	Hallmark	HALLMARK_MYOGENESIS	4663	1419	58	30	1.6997	0.00033135	0.0019359
C3	Hallmark	HALLMARK_UV_RESPONSE_DN	4663	1419	49	25	1.6766	0.0012083	0.0041082
C3	Hallmark	HALLMARK_ESTROGEN_RESPONSE_LATE	4663	1419	64	32	1.6431	0.00045245	0.0019359
C3	WikiPathway	WP_FRAGILE_X_SYNDROME	4663	1419	51	25	1.6108	0.0023084	0.048337
C3	Reactome pathway	Ub-specific processing proteases	4663	1419	64	31	1.5917	0.0010153	0.014081
C3	Hallmark	HALLMARK_APOPTOSIS	4663	1419	62	29	1.5371	0.0025671	0.0074669
C3	WikiPathway	WP_ALZHEIMERS_DISEASE	4663	1419	81	37	1.5011	0.001317	0.031767
C3	WikiPathway	WP_ALZHEIMERS_DISEASE_AND_MIRNA_EFFECTS	4663	1419	81	37	1.5011	0.001317	0.031767
C3	Hallmark	HALLMARK_INTERFERON_GAMMA_RESPONSE	4663	1419	58	26	1.4731	0.0071915	0.018338
C3	Cluster	Unclassified_2	4663	1419	34	15	1.4498	0.033221	0.040603
C3	Hallmark	HALLMARK_ADIPOGENESIS	4663	1419	84	37	1.4475	0.0026354	0.0074669
C3	Hallmark	HALLMARK_APICAL_JUNCTION	4663	1419	63	27	1.4083	0.011381	0.024185
C3	Reactome pathway	Neutrophil degranulation	4663	1419	181	77	1.398	0.00012967	0.0021195
C3	Hallmark	HALLMARK_PROTEIN_SECRETION	4663	1419	52	22	1.3903	0.021485	0.042144
C3	Hallmark	HALLMARK_FATTY_ACID_METABOLISM	4663	1419	78	33	1.3903	0.0076019	0.018462
C3	Hallmark	HALLMARK_ESTROGEN_RESPONSE_EARLY	4663	1419	71	30	1.3885	0.010196	0.023636
