# Supplementary material for: Spatial proteomics of ovarian cancer precursors delineates early disease changes and drug targets
Source: Mol Syst Biol. 2025 Nov 13;22(1):7–41. doi: 10.1038/s44320-025-00168-4 (PMC12759074; doi:10.1038/s44320-025-00168-4)
Supplement: Supplementary file 16 — Dataset EV10 [file 44320_2025_168_MOESM16_ESM.xlsx]

## Sheet: Legend
Dataset EV 10. Student's t-test results used for differential abundance analysis of PAX8-positive NFTE and PAX8-negative NFTE samples and visualized in the volcano plot figure EV3F.

## Sheet: Dataset EV10
Gene	Protein Group	Protein ID	Protein name	First protein description	T-test difference	T-test statistic	T-test p-value	T-test q-value
TMA7;TMA7B	A0A024R1R8;Q9Y2S6	Q9Y2S6;A0A024R1R8	TMA7B_HUMAN;TMA7_HUMAN	Translation machinery-associated protein 7B	0.71875	4.0356	2.62379	0.00122881
NUDT4B	A0A024RBG1	A0A024RBG1	NUD4B_HUMAN	Diphosphoinositol polyphosphate phosphohydrolase NUDT4B	0.570287	2.129	1.22826	0.0307625
IGKV2-28;IGKV2D-28	A0A075B6P5;P01615	A0A075B6P5;P01615	KV228_HUMAN;KVD28_HUMAN	Immunoglobulin kappa variable 2-28	1.27477	1.39493	0.713892	0.119522
IGHV3OR16-12	A0A075B7B8	A0A075B7B8	A0A075B7B8_HUMAN	Immunoglobulin heavy variable 3/OR16-12 (non-functional) (Fragment)	0.103535	0.141724	0.050555	0.859897
CCDC187	A0A096LP49	A0A096LP49	CC187_HUMAN	Coiled-coil domain-containing protein 187	-1.74142	-6.50594	4.16471	5.6444e-05
IGKV3-11;IGKV3D-11	A0A0A0MRZ8;P04433	A0A0A0MRZ8;P04433	KV311_HUMAN;KVD11_HUMAN	Immunoglobulin kappa variable 3D-11	0.348195	0.657046	0.279028	0.424047
IGHV3-49	A0A0A0MS15	A0A0B4J1V6;A0A0A0MS15	HV349_HUMAN	Immunoglobulin heavy variable 3-49	0.248462	0.552649	0.227208	0.497247
IGHV6-1	A0A0B4J1U7	A0A0B4J1U7	HV601_HUMAN	Immunoglobulin heavy variable 6-1	0.277557	0.563818	0.232622	0.489066
IGHV3-74	A0A0B4J1X5	A0A0B4J1X5;A0A075B7E8	HV374_HUMAN	Immunoglobulin heavy variable 3-74	-0.505524	-0.508525	0.206129	0.530176
IGHV3-72	A0A0B4J1Y9	A0A0B4J1Y9	HV372_HUMAN	Immunoglobulin heavy variable 3-72	0.397046	0.863472	0.389222	0.304602
GATD3;GATD3B	A0A0B4J2D5;P0DPI2	P0DPI2;A0A0B4J2D5	GAL3A_HUMAN;GAL3B_HUMAN	Putative glutamine amidotransferase-like class 1 domain-containing protein 3B, mitochondrial	0.306789	2.6335	1.60186	0.0124717
IGHV1-69;IGHV1-69D	A0A0B4J2H0;P01742	P0DP01;P01742;A0A0B4J2H0;P01743;A0A0C4DH29	HV169_HUMAN;HV69D_HUMAN	Immunoglobulin heavy variable 1-69D	1.16684	1.48166	0.771494	0.102111
IGKV3D-20	A0A0C4DH25	A0A0C4DH25	KVD20_HUMAN	Immunoglobulin kappa variable 3D-20	0.841055	1.37871	0.703245	0.123036
IGHV1-18	A0A0C4DH31	A0A0C4DH31	HV118_HUMAN	Immunoglobulin heavy variable 1-18	-0.379239	-0.36804	0.142357	0.645694
IGHV5-51	A0A0C4DH38	A0A0C4DH38	HV551_HUMAN	Immunoglobulin heavy variable 5-51	0.168877	0.257422	0.0957865	0.747339
IGHV4-30-4;IGHV4-34;IGHV4-38-2;IGHV4-39;IGHV4-59;IGHV4-61	A0A0C4DH41;P01824;P01825;P06331;P0DP06;P0DP08	P0DP06;P0DP08;P01824;P01825;A0A0C4DH41;A0A0J9YWU9;P06331	HV434_HUMAN;HV439_HUMAN;HV459_HUMAN;HV461_HUMAN;HVD34_HUMAN;HVD82_HUMAN	Immunoglobulin heavy variable 4-61	0.178948	0.354632	0.13654	0.657978
IGHV3-64D	A0A0J9YX35	A0A0J9YX35	HV64D_HUMAN	Immunoglobulin heavy variable 3-64D	-0.0412282	-0.179222	0.064824	0.824085
GNG5;GNG5B	A0A804HLA8;P63218	A0A804HLA8;P63218	GBG5B_HUMAN;GBG5_HUMAN	Guanine nucleotide-binding protein G(I)/G(S)/G(O) subunit gamma-5B	-0.114779	-0.78176	0.344412	0.347853
RBM47	A0AV96	A0AV96	RBM47_HUMAN	RNA-binding protein 47	-0.199083	-4.37817	2.85969	0.000760286
IFT56	A0AVF1	A0AVF1	IFT56_HUMAN	Intraflagellar transport protein 56	-1.71086	-7.31511	4.59249	1.49813e-05
UBA6	A0AVT1	A0AVT1	UBA6_HUMAN	Ubiquitin-like modifier-activating enzyme 6	0.133859	1.69695	0.918803	0.0683979
ESYT2	A0FGR8	A0FGR8	ESYT2_HUMAN	Extended synaptotagmin-2	0.0185112	0.0954876	0.0334763	0.904311
SHTN1	A0MZ66	A0MZ66	SHOT1_HUMAN	Shootin-1	0.619164	9.51584	5.60201	3.63636e-05
DAPL1	A0PJW8	A0PJW8	DAPL1_HUMAN	Death-associated protein-like 1	2.64558	5.65235	3.67414	0.000139249
CFAP119	A1A4V9	A1A4V9	CF119_HUMAN	Cilia- and flagella-associated protein 119	-2.55015	-4.98299	3.25886	0.000342733
ARHGEF37	A1IGU5	A1IGU5	ARH37_HUMAN	Rho guanine nucleotide exchange factor 37	-0.184003	-1.73244	0.94361	0.0640691
MEX3A	A1L020	Q86XN8;Q6ZN04;Q5U5Q3;A1L020	MEX3A_HUMAN	RNA-binding protein MEX3A	0.877107	3.01283	1.88424	0.0063859
ILVBL	A1L0T0	A1L0T0	HACL2_HUMAN	2-hydroxyacyl-CoA lyase 2	0.551976	12.8368	6.81079	0.000176471
PLEKHG3	A1L390	A1L390	PKHG3_HUMAN	Pleckstrin homology domain-containing family G member 3	0.493494	4.64472	3.0384	0.000494163
SH3PXD2B	A1X283	A1X283	SPD2B_HUMAN	SH3 and PX domain-containing protein 2B	0.955438	6.27016	4.03341	7.60588e-05
CIBAR1	A1XBS5	A1XBS5	CBAR1_HUMAN	CBY1-interacting BAR domain-containing protein 1	-1.42439	-4.73785	3.0998	0.00042664
MACROD2	A1Z1Q3	A1Z1Q3	MACD2_HUMAN	ADP-ribose glycohydrolase MACROD2	0.783378	2.11926	1.22114	0.031391
CCDC78	A2IDD5	A2IDD5	CCD78_HUMAN	Coiled-coil domain-containing protein 78	-3.10686	-6.70026	4.27061	4.41767e-05
NBAS	A2RRP1	A2RRP1	NBAS_HUMAN	NBAS subunit of NRZ tethering complex	-0.0218329	-0.474385	0.190162	0.55751
DCDC2B	A2VCK2	A2VCK2	DCD2B_HUMAN	Doublecortin domain-containing protein 2B	-2.35836	-4.00492	2.60233	0.00128177
VWA8	A3KMH1	A3KMH1	VWA8_HUMAN	von Willebrand factor A domain-containing protein 8	-0.251182	-2.22336	1.29752	0.0258124
SBNO1	A3KN83	A3KN83	SBNO1_HUMAN	Protein strawberry notch homolog 1	-0.0566796	-0.714731	0.308809	0.387292
GTPBP10	A4D1E9	A4D1E9	GTPBA_HUMAN	GTP-binding protein 10	-0.188336	-1.12262	0.540863	0.194483
WDR91	A4D1P6	A4D1P6	WDR91_HUMAN	WD repeat-containing protein 91	1.28224	11.4468	6.3422	9.30233e-05
DENND11	A4D1U4	A4D1U4	DEN11_HUMAN	DENN domain-containing protein 11	-0.76173	-2.4153	1.43946	0.0182649
MTMR11	A4FU01	A4FU01	MTMRB_HUMAN	Myotubularin-related protein 11	1.44302	1.81061	0.998688	0.0552123
EFCAB5	A4FU69	A4FU69	EFCB5_HUMAN	EF-hand calcium-binding domain-containing protein 5	0.463799	0.552318	0.227048	0.497421
CFAP90	A4QMS7	A4QMS7	CFA90_HUMAN	Cilia- and flagella-associated protein 90	-1.85799	-3.01849	1.88844	0.00632285
VPS37C	A5D8V6	A5D8V6	VP37C_HUMAN	Vacuolar protein sorting-associated protein 37C	-0.144517	-1.28113	0.640053	0.146715
ODAD3	A5D8V7	A5D8V7	ODAD3_HUMAN	Outer dynein arm-docking complex subunit 3	-2.77791	-4.31975	2.81996	0.000802437
CFAP69	A5D8W1	A5D8W1	CFA69_HUMAN	Cilia- and flagella-associated protein 69	-1.93497	-5.15644	3.36913	0.000256881
CNOT1	A5YKK6	A5YKK6	CNOT1_HUMAN	CCR4-NOT transcription complex subunit 1	0.46098	10.0458	5.81693	4.74308e-05
CDHR4	A6H8M9	A6H8M9	CDHR4_HUMAN	Cadherin-related family member 4	-2.5577	-8.26489	5.05344	2.10896e-05
MAP1LC3B;MAP1LC3B2	A6NCE7;Q9GZQ8	Q9GZQ8;A6NCE7	MLP3B_HUMAN;MP3B2_HUMAN	Microtubule-associated proteins 1A/1B light chain 3 beta 2	-3.32833	-4.64496	3.03856	0.000494404
VWA3A	A6NCI4	A6NCI4	VWA3A_HUMAN	von Willebrand factor A domain-containing protein 3A	-2.44024	-3.75815	2.42789	0.00179063
PALM3	A6NDB9	A6NDB9	PALM3_HUMAN	Paralemmin-3	1.07395	2.87755	1.78371	0.00810848
PGP	A6NDG6	A6NDG6	PGP_HUMAN	Glycerol-3-phosphate phosphatase	0.0519125	0.441109	0.174887	0.584293
RIMOC1	A6NDU8	A6NDU8	RIMC1_HUMAN	RAB7A-interacting MON1-CCZ1 complex subunit 1	0.738937	6.75665	4.30095	4.5082e-05
EFCAB10	A6NFE3	A6NFE3	EFC10_HUMAN	EF-hand calcium-binding domain-containing protein 10	-2.07122	-3.7111	2.39426	0.00192603
CFAP73	A6NFT4	A6NFT4	CFA73_HUMAN	Cilia- and flagella-associated protein 73	-2.45017	-4.65078	3.04241	0.000491228
WIPF3	A6NGB9	A6NGB9	WIPF3_HUMAN	WAS/WASL-interacting protein family member 3	-1.73807	-5.53968	3.60617	0.000136393
GGT1;GGT3P	A6NGU5;P19440	P36268;A6NGU5;P19440	GGT1_HUMAN;GGT3_HUMAN	Putative glutathione hydrolase 3 proenzyme	1.76011	3.28279	2.08355	0.00401682
SMCHD1	A6NHR9	A6NHR9	SMHD1_HUMAN	Structural maintenance of chromosomes flexible hinge domain-containing protein 1	0.457885	9.40801	5.55708	3.51906e-05
CCDC69	A6NI79	A6NI79	CCD69_HUMAN	Coiled-coil domain-containing protein 69	-2.56441	-9.07629	5.41619	3.02267e-05
UNC119B	A6NIH7	A6NIH7;Q13432	U119B_HUMAN	Protein unc-119 homolog B	-0.396866	-3.36012	2.14021	0.00352576
FAM166C	A6NJV1	A6NJV1	F166C_HUMAN	Protein FAM166C	-1.79503	-4.37168	2.85529	0.000782183
LIPT2	A6NK58	A6NK58	LIPT2_HUMAN	Putative lipoyltransferase 2, mitochondrial	-0.438425	-1.14107	0.552176	0.188223
CCDC85C	A6NKD9	A6NKD9	CC85C_HUMAN	Coiled-coil domain-containing protein 85C	1.25637	5.49297	3.57777	0.000144609
SNTN	A6NMZ2	A6NMZ2	SNTAN_HUMAN	Sentan	-3.43939	-5.61512	3.65177	0.000137838
C2orf81	A6NN90	A6NN90	CB081_HUMAN	Uncharacterized protein C2orf81	-2.18097	-10.2429	5.89445	5.24017e-05
ENO4	A6NNW6	A6NNW6	ENO4_HUMAN	Enolase 4	-0.46417	-1.30854	0.657648	0.139554
RIIAD1	A6NNX1	A6NNX1	RIAD1_HUMAN	RIIa domain-containing protein 1	-0.906206	-2.55392	1.54256	0.0142809
LRRIQ3	A6PVS8	A6PVS8	LRIQ3_HUMAN	Leucine-rich repeat and IQ domain-containing protein 3	-0.0276705	-0.100208	0.0351937	0.899426
C4orf47	A7E2U8	A7E2U8	CD047_HUMAN	UPF0602 protein C4orf47	-2.12971	-4.4338	2.89735	0.000693358
ZSWIM8	A7E2V4	A7E2V4	ZSWM8_HUMAN	Zinc finger SWIM domain-containing protein 8	0.0470432	0.0744919	0.0259085	0.926169
ARHGAP32	A7KAX9	A7KAX9	RHG32_HUMAN	Rho GTPase-activating protein 32	-0.174362	-1.9429	1.09317	0.0433158
POM121C	A8CG34	Q96HA1;A8CG34;Q6PJE2	P121C_HUMAN	Nuclear envelope pore membrane protein POM 121C	1.04923	2.37652	1.41069	0.0195193
EFCAB7	A8K855	A8K855	EFCB7_HUMAN	EF-hand calcium-binding domain-containing protein 7	-1.86655	-3.40646	2.17406	0.00325896
SFI1	A8K8P3	A8K8P3	SFI1_HUMAN	Protein SFI1 homolog	-1.4129	-3.759	2.42849	0.00178901
ZBBX	A8MT70	A8MT70	ZBBX_HUMAN	Zinc finger B-box domain-containing protein 1	-2.44663	-11.9109	6.50398	0.000114286
FAM166B	A8MTA8	A8MTA8	F166B_HUMAN	Protein FAM166B	-2.53781	-3.39993	2.16929	0.00329498
FAM171A2	A8MVW0	A8MVW0	F1712_HUMAN	Protein FAM171A2	2.04154	5.76527	3.7415	0.000110874
SNRPG;SNRPGP15	A8MWD9;P62308	A8MWD9;P62308	RUXGL_HUMAN;RUXG_HUMAN	Putative small nuclear ribonucleoprotein G-like protein 15	0.549635	5.43071	3.5397	0.000161514
NUDT19	A8MXV4	A8MXV4	NUD19_HUMAN	Acyl-coenzyme A diphosphatase NUDT19	-0.0365272	-0.15383	0.0551206	0.848559
TTC34	A8MYJ7	A8MYJ7	TTC34_HUMAN	Tetratricopeptide repeat protein 34	-1.93494	-6.69396	4.2672	4.40882e-05
ODF3B	A8MYP8	A8MYP8	ODF3B_HUMAN	Outer dense fiber protein 3B	-3.04531	-5.29064	3.45317	0.000228778
KPNA7	A9QM74	A9QM74	IMA8_HUMAN	Importin subunit alpha-8	0.483279	1.37161	0.698593	0.124511
FHAD1	B1AJZ9	B1AJZ9	FHAD1_HUMAN	Forkhead-associated domain-containing protein 1	-2.09996	-4.76408	3.117	0.000419665
ESPN	B1AK53	B1AK53	ESPN_HUMAN	Espin	-1.39468	-6.17543	3.97977	7.38875e-05
EIF3C;EIF3CL	B5ME19;Q99613	Q99613;B5ME19	EIF3C_HUMAN;EIFCL_HUMAN	Eukaryotic translation initiation factor 3 subunit C-like protein	0.388169	4.98755	3.26178	0.000343478
GPR89A;GPR89B	B7ZAQ6;P0CG08	P0CG08;B7ZAQ6	GPHRA_HUMAN;GPHRB_HUMAN	Golgi pH regulator A	0.463157	4.53977	2.96856	0.000604059
HNRNPCL1;HNRNPCL3;HNRNPCL4	B7ZW38;O60812;P0DMR1	B7ZW38;O60812;P0DMR1	HNRC1_HUMAN;HNRC3_HUMAN;HNRC4_HUMAN	Heterogeneous nuclear ribonucleoprotein C-like 3	0.195486	0.416826	0.163921	0.603945
WASH2P;WASH3P	C4AMC7;Q6VEQ5	C4AMC7;A8K0Z3;Q6VEQ5;A8MWX3	WASH2_HUMAN;WASH3_HUMAN	Putative WAS protein family homolog 3	-0.0416006	-0.566176	0.233769	0.48751
TMEM238	C9JI98	C9JI98	TM238_HUMAN	Transmembrane protein 238	0.537128	2.12831	1.22776	0.0307868
MCRIP1	C9JLW8	C9JLW8	MCRI1_HUMAN	Mapk-regulated corepressor-interacting protein 1	0.753963	2.15794	1.24946	0.0291165
KRT15	Cont_O77727	P19012;P13646;Cont_P13646;Cont_P19012;Cont_O77727	K1C15_SHEEP	Keratin, type I cytoskeletal 15	-0.326088	-1.27926	0.638856	0.147111
KRT14	Cont_P02533;P02533	P02533;Cont_P02533;Cont_Q6IFX2	K1C14_HUMAN	Keratin, type I cytoskeletal 14	-0.597771	-0.915166	0.418343	0.278808
KRT6A	Cont_P02538;P02538	P02538;O95678;P48668;Cont_O95678;Cont_P02538;Cont_P48668;Cont_P50446;Cont_Q8BGZ7	K2C6A_HUMAN	Keratin, type II cytoskeletal 6A	0.0894101	0.123514	0.0437609	0.8774
KRT1	Cont_P04264;P04264	P04264;Cont_P04264	K2C1_HUMAN	Keratin, type II cytoskeletal 1	-0.0906308	-0.106956	0.0376596	0.893284
KRT18	Cont_P05783;P05783	P05783;Cont_P05783;Cont_P05784	K1C18_HUMAN	Keratin, type I cytoskeletal 18	0.476558	2.71736	1.66438	0.0106999
KRT8	Cont_P05787;P05787	P05787;Cont_P05787	K2C8_HUMAN	Keratin, type II cytoskeletal 8	-0.533366	-3.01758	1.88777	0.00632625
KRT19	Cont_P08727;P08727	P08727;Cont_P08727	K1C19_HUMAN	Keratin, type I cytoskeletal 19	-0.352974	-1.64188	0.880592	0.0757068
KRT7	Cont_P08729;P08729	P08729;Cont_P08729	K2C7_HUMAN	Keratin, type II cytoskeletal 7	2.60015	4.28944	2.79926	0.000837209
KRT16	Cont_P08779;P08779	P08779;Cont_P08779	K1C16_HUMAN	Keratin, type I cytoskeletal 16	0.465818	0.486218	0.195662	0.547608
KRT10	Cont_P13645;P13645	P13645;Cont_P13645	K1C10_HUMAN	Keratin, type I cytoskeletal 10	0.120802	0.142043	0.0506747	0.85967
KRT5	Cont_P13647;P13647	P13647;Cont_P13647;Cont_Q922U2	K2C5_HUMAN	Keratin, type II cytoskeletal 5	-0.819337	-1.40497	0.720505	0.117682
KRT15	Cont_P19012;P19012	P19012;Q99456;P13646;Cont_P13646;Cont_P19012;Cont_Q99456	K1C15_HUMAN	Keratin, type I cytoskeletal 15	-1.52709	-3.14447	1.98169	0.00505538
KRT4	Cont_P19013;P19013	P19013;Cont_P19013	K2C4_HUMAN	Keratin, type II cytoskeletal 4	-1.15484	-1.54041	0.811115	0.0915112
FLG	Cont_P20930;P20930	P20930;Cont_P20930	FILA_HUMAN	Filaggrin	0.42765	0.836534	0.374282	0.318304
KRT9	Cont_P35527;P35527	P35527;Cont_P35527	K1C9_HUMAN	Keratin, type I cytoskeletal 9	-0.539275	-0.56712	0.234228	0.486787
KRT2	Cont_P35908;P35908	P35908;Cont_P35908	K22E_HUMAN	Keratin, type II cytoskeletal 2 epidermal	0.243741	0.247331	0.0916995	0.757144
ACTB;ACTG1	Cont_P60712;P60709;P63261	P63261;P60709;Cont_P60712	ACTB_BOVIN;ACTB_HUMAN;ACTG_HUMAN	Actin, cytoplasmic 1	0.172432	2.56185	1.54847	0.0141265
YWHAZ	Cont_P63103;P63104	P63104;Cont_P63103	1433Z_BOVIN;1433Z_HUMAN	14-3-3 protein zeta/delta	0.180223	1.8103	0.998472	0.055217
EEF1A1;EEF1A1P5	Cont_P68103;P68104;Q5VTE0	P68104;Q5VTE0;Cont_P68103	EF1A1_BOVIN;EF1A1_HUMAN;EF1A3_HUMAN	Elongation factor 1-alpha 1	0.304289	3.27464	2.07756	0.00404776
KRT85	Cont_P78386;P78386	P78386;A6NCN2;P78385;Cont_A6NCN2;Cont_P78385;Cont_P78386;Cont_P02539;Cont_P25691	KRT85_HUMAN	Keratin, type II cuticular Hb5	2.73595	4.16156	2.71133	0.00101909
TUBA4A	Cont_P81948;P68366	P68366;P68363;Cont_P81948	TBA4A_BOVIN;TBA4A_HUMAN	Tubulin alpha-4A chain	0.580092	5.58616	3.63431	0.000136091
KRT17	Cont_Q04695;Q04695	Q04695;Cont_Q04695;Cont_Q9QWL7	K1C17_HUMAN	Keratin, type I cytoskeletal 17	-0.923022	-1.1733	0.572085	0.177522
KRT32	Cont_Q14532;Q14532	Q14532;Cont_Q14532	K1H2_HUMAN	Keratin, type I cuticular Ha2	-0.361651	-0.508961	0.206335	0.529889
TUBA1D	Cont_Q2HJ86	P68366;P68363;Q9BQE3;Q71U36;A6NHL2;Cont_P81948;Cont_Q2HJ86	TBA1D_BOVIN	Tubulin alpha-1D chain	-0.966967	-5.9863	3.87113	8.69565e-05
TUBB;TUBB5	Cont_Q2KJD0;P07437	P07437;Cont_Q2KJD0	TBB5_BOVIN;TBB5_HUMAN	Tubulin beta-5 chain	1.73062	9.61492	5.64293	3.78549e-05
FLG2	Cont_Q5D862;Q5D862	Q5D862;Cont_Q5D862	FILA2_HUMAN	Filaggrin-2	0.341791	0.576187	0.238654	0.479684
TPM2	Cont_Q5KR48;P07951	P07951;Cont_Q5KR48	TPM2_BOVIN;TPM2_HUMAN	Tropomyosin beta chain	-0.363736	-1.66949	0.899704	0.0720586
KRT79	Cont_Q5XKE5;Q5XKE5	Q5XKE5;Cont_Q5XKE5;Cont_Q8VED5	K2C79_HUMAN	Keratin, type II cytoskeletal 79	1.77651	2.88728	1.79096	0.00796531
Krt72	Cont_Q6IME9	Q86Y46;Q3SY84;Q14CN4;Q7RTS7;Cont_Q14CN4;Cont_Q3SY84;Cont_Q7RTS7;Cont_Q86Y46;Cont_Q6IME9	K2C72_MOUSE	Keratin, type II cytoskeletal 72	1.54574	2.50169	1.50368	0.0156202
KRT80	Cont_Q6KB66;Q6KB66	Q6KB66;Cont_Q6KB66	K2C80_HUMAN	Keratin, type II cytoskeletal 80	-1.8524	-4.51045	2.94892	0.000620979
KRT77	Cont_Q7Z794;Q7Z794	Q7Z794;Cont_Q7Z794	K2C1B_HUMAN	Keratin, type II cytoskeletal 1b	0.410781	0.559652	0.230599	0.492141
HRNR	Cont_Q86YZ3;Q86YZ3	Q86YZ3;Cont_Q86YZ3	HORN_HUMAN	Hornerin	-0.364207	-0.414647	0.162945	0.605542
KRT78	Cont_Q8N1N4;Q8N1N4	Q8N1N4;Cont_Q8N1N4	K2C78_HUMAN	Keratin, type II cytoskeletal 78	-1.50974	-2.5725	1.5564	0.0139433
KRT23	Cont_Q9C075;Q9C075	Q9C075;Cont_Q9C075;Cont_Q99PS0	K1C23_HUMAN	Keratin, type I cytoskeletal 23	-2.20133	-5.13726	3.35703	0.000259091
Krt7	Cont_Q9DCV7	O95678;Cont_O95678;Cont_Q9DCV7	K2C7_MOUSE	Keratin, type II cytoskeletal 7	1.51981	1.81052	0.998624	0.0552081
KRT84	Cont_Q9NSB2;Q9NSB2	Q01546;Q9NSB2;Cont_Q01546;Cont_Q9NSB2	KRT84_HUMAN	Keratin, type II cuticular Hb4	-1.13307	-1.06935	0.508575	0.213935
CFAP99	D6REC4	D6REC4	CFA99_HUMAN	Cilia- and flagella-associated protein 99	-2.54907	-5.7793	3.74981	0.000111908
ANKRD65	E5RJM6	E5RJM6	ANR65_HUMAN	Ankyrin repeat domain-containing protein 65	-1.81139	-5.68628	3.69447	0.000135266
NACA	E9PAV3	E9PAV3	NACAM_HUMAN	Nascent polypeptide-associated complex subunit alpha, muscle-specific form	0.909841	8.70901	5.25529	2.63158e-05
C11orf98	E9PRG8	E9PRG8	CK098_HUMAN	Uncharacterized protein C11orf98	0.672077	3.78677	2.44828	0.00174003
STMND1	H3BQB6	H3BQB6	STMD1_HUMAN	Stathmin domain-containing protein 1	-1.67337	-4.01569	2.60987	0.00126733
CROCC2	H7BZ55	H7BZ55	CRCC2_HUMAN	Ciliary rootlet coiled-coil protein 2	-3.16036	-7.42383	4.64741	1.55039e-05
DCDC1	M0R2J8	M0R2J8	DCDC1_HUMAN	Doublecortin domain-containing protein 1	-0.347619	-1.08589	0.518544	0.207736
DNASE2	O00115	O00115	DNS2A_HUMAN	Deoxyribonuclease-2-alpha	-0.32111	-1.97106	1.11346	0.0412004
AGPS	O00116	O00116	ADAS_HUMAN	Alkyldihydroxyacetonephosphate synthase, peroxisomal	0.0886783	1.33896	0.677319	0.132197
KIF2A	O00139	O00139	KIF2A_HUMAN	Kinesin-like protein KIF2A	-0.873517	-5.58027	3.63075	0.000135909
TK2	O00142	O00142	KITM_HUMAN	Thymidine kinase 2, mitochondrial	-0.473452	-2.37281	1.40795	0.0196398
DDX39A	O00148	O00148	DX39A_HUMAN	ATP-dependent RNA helicase DDX39A	-0.118888	-0.829072	0.370172	0.322055
PDLIM1	O00151	O00151	PDLI1_HUMAN	PDZ and LIM domain protein 1	-1.27302	-4.78616	3.13145	0.000414359
ACOT7	O00154	O00154	BACH_HUMAN	Cytosolic acyl coenzyme A thioester hydrolase	1.18846	1.92532	1.08053	0.0448624
MYO1C	O00159	O00159	MYO1C_HUMAN	Unconventional myosin-Ic	0.485686	2.64455	1.6101	0.0122674
MYO1F	O00160	O00160	MYO1F_HUMAN	Unconventional myosin-If	0.0875264	0.228133	0.0839992	0.775948
SNAP23	O00161	O00161	SNP23_HUMAN	Synaptosomal-associated protein 23	0.147365	1.34516	0.681348	0.130762
HAX1	O00165	O00165	HAX1_HUMAN	HCLS1-associated protein X-1	0.522242	1.23333	0.609674	0.159671
FXYD1	O00168	O00168	PLM_HUMAN	Phospholemman	0.656935	2.24308	1.31204	0.0249
AIP	O00170	O00170	AIP_HUMAN	AH receptor-interacting protein	0.580767	6.18087	3.98286	7.41365e-05
GTPBP1	O00178	O00178	GTPB1_HUMAN	GTP-binding protein 1	-0.109309	-2.16928	1.25777	0.0285232
LGALS9	O00182	O00182	LEG9_HUMAN	Galectin-9	0.686262	3.26051	2.06719	0.00412596
STXBP3	O00186	O00186	STXB3_HUMAN	Syntaxin-binding protein 3	0.592529	6.69985	4.27038	4.41324e-05
ARVCF	O00192	O00192	ARVC_HUMAN	Splicing regulator ARVCF	0.386832	4.1749	2.72054	0.001005
SMAP	O00193	O00193	SMAP_HUMAN	Small acidic protein	0.265811	1.84414	1.02249	0.0519441
RAB27B	O00194	O00194	RB27B_HUMAN	Ras-related protein Rab-27B	1.06258	4.25222	2.77377	0.000888699
AP3B1	O00203	Q13367;O00203	AP3B1_HUMAN	AP-3 complex subunit beta-1	0.24942	5.3687	3.50154	0.000190949
APBB1	O00213	O00213	APBB1_HUMAN	Amyloid beta precursor protein binding family B member 1	-0.0661798	-0.553203	0.227476	0.496858
LGALS8	O00214	O00214	LEG8_HUMAN	Galectin-8	1.90105	8.50817	5.16503	2.37624e-05
NDUFS8	O00217	O00217	NDUS8_HUMAN	NADH dehydrogenase [ubiquinone] iron-sulfur protein 8, mitochondrial	0.467999	4.52449	2.95833	0.000610773
NFKBIE	O00221	O00221	IKBE_HUMAN	NF-kappa-B inhibitor epsilon	1.1061	7.49302	4.68206	1.59787e-05
PSMD11	O00231	O00231	PSD11_HUMAN	26S proteasome non-ATPase regulatory subunit 11	0.262987	4.72531	3.09156	0.000424092
PSMD12	O00232	O00232	PSD12_HUMAN	26S proteasome non-ATPase regulatory subunit 12	0.215746	4.69135	3.06921	0.000447953
PSMD9	O00233	O00233	PSMD9_HUMAN	26S proteasome non-ATPase regulatory subunit 9	0.334325	4.33932	2.83329	0.000799297
ATOX1	O00244	O00244	ATOX1_HUMAN	Copper transport protein ATOX1	0.574093	4.07202	2.64919	0.0011629
MEN1	O00255	O00255	MEN1_HUMAN	Menin	0.678203	1.78996	0.984082	0.0573223
PGRMC1	O00264	O00264	PGRC1_HUMAN	Membrane-associated progesterone receptor component 1	0.182694	1.08834	0.520023	0.206925
SUPT5H	O00267	O00267	SPT5H_HUMAN	Transcription elongation factor SPT5	0.273209	4.52866	2.96112	0.000610329
TAF4	O00268	O00268	TAF4_HUMAN	Transcription initiation factor TFIID subunit 4	0.370517	2.39557	1.42482	0.0189468
DFFA	O00273	O00273	DFFA_HUMAN	DNA fragmentation factor subunit alpha	0.847355	8.75797	5.27705	2.68456e-05
RFXAP	O00287	O00287	RFXAP_HUMAN	Regulatory factor X-associated protein	0.529996	1.26931	0.632504	0.149614
HIP1	O00291	O00291	HIP1_HUMAN	Huntingtin-interacting protein 1	0.159002	1.22278	0.603022	0.162562
CLIC1	O00299	O00299	CLIC1_HUMAN	Chloride intracellular channel protein 1	-0.237684	-1.67011	0.900137	0.071966
EIF3F	O00303	O00303	EIF3F_HUMAN	Eukaryotic translation initiation factor 3 subunit F	0.446095	5.78968	3.75596	0.000112962
WWP2	O00308	O00308	WWP2_HUMAN	NEDD4-like E3 ubiquitin-protein ligase WWP2	-1.23083	-2.8231	1.74318	0.00894761
PDHX	O00330	O00330	ODPX_HUMAN	Pyruvate dehydrogenase protein X component, mitochondrial	-0.658373	-5.27342	3.44245	0.000232475
MATN2	O00339	O00339	MATN2_HUMAN	Matrilin-2	1.01654	1.97937	1.11946	0.0406195
QSOX1	O00391	O00391	QSOX1_HUMAN	Sulfhydryl oxidase 1	-0.100408	-0.422457	0.166451	0.598864
SLC33A1	O00400	O00400	ACATN_HUMAN	Acetyl-coenzyme A transporter 1	0.578094	1.25817	0.625408	0.152606
WASL	O00401	O00401	WASL_HUMAN	Actin nucleation-promoting factor WASL	-0.557229	-3.40215	2.17091	0.00327443
IPO5	O00410	O00410	IPO5_HUMAN	Importin-5	0.312751	3.46004	2.21308	0.0029425
EEF2K	O00418	O00418	EF2K_HUMAN	Eukaryotic elongation factor 2 kinase	0.425757	2.33419	1.37934	0.0210411
SAP18	O00422	O00422	SAP18_HUMAN	Histone deacetylase complex subunit SAP18	0.423992	3.08339	1.93653	0.00568447
EML1	O00423	O00423	EMAL1_HUMAN	Echinoderm microtubule-associated protein-like 1	-0.717456	-5.7314	3.72138	0.000121042
DNM1L	O00429	O00429	DNM1L_HUMAN	Dynamin-1-like protein	0.567502	7.10847	4.48649	2.33645e-05
RTCA	O00442	O00442	RTCA_HUMAN	RNA 3'-terminal phosphate cyclase	-0.115456	-1.15962	0.563613	0.181839
PIK3C2A	O00443	O00443	P3C2A_HUMAN	Phosphatidylinositol 4-phosphate 3-kinase C2 domain-containing subunit alpha	0.0529468	0.790061	0.348895	0.343132
IFRD1	O00458	O00458	IFRD1_HUMAN	Interferon-related developmental regulator 1	0.519881	1.17527	0.573306	0.177026
PIK3R2	O00459	O00459	P85B_HUMAN	Phosphatidylinositol 3-kinase regulatory subunit beta	-0.744361	-1.63102	0.873095	0.0771303
AGRN	O00468	O00468	AGRIN_HUMAN	Agrin	0.693092	2.90213	1.802	0.00776546
PLOD2	O00469	O00469	PLOD2_HUMAN	Procollagen-lysine,2-oxoglutarate 5-dioxygenase 2	-0.109105	-0.27001	0.100923	0.735446
MEIS1;MEIS2	O00470;O14770	O00470;A6NDR6;Q99687;O14770;A8K0S8	MEIS1_HUMAN;MEIS2_HUMAN	Homeobox protein Meis1	1.23384	4.80397	3.14307	0.000408669
EXOC5	O00471	O00471	EXOC5_HUMAN	Exocyst complex component 5	0.0472224	0.854685	0.384331	0.309045
BTN3A3	O00478	P78410;O00481;O00478	BT3A3_HUMAN	Butyrophilin subfamily 3 member A3	0.82465	3.81813	2.47059	0.00165584
HMGN4	O00479	O00479	HMGN4_HUMAN	High mobility group nucleosome-binding domain-containing protein 4	0.855902	7.68853	4.77873	1.69252e-05
NDUFA4	O00483	O00483	NDUA4_HUMAN	Cytochrome c oxidase subunit NDUFA4	-0.188761	-1.20471	0.591669	0.167885
PSMD14	O00487	O00487	PSDE_HUMAN	26S proteasome non-ATPase regulatory subunit 14	0.196254	2.3971	1.42596	0.0189026
BIN1	O00499	O00499	BIN1_HUMAN	Myc box-dependent-interacting protein 1	1.03778	6.07574	3.92276	7.72325e-05
KPNA3	O00505	O00505	IMA4_HUMAN	Importin subunit alpha-4	-0.519103	-3.45768	2.21137	0.00294901
STK25	O00506	O00506	STK25_HUMAN	Serine/threonine-protein kinase 25	-0.035914	-0.330694	0.126272	0.678981
BCL9	O00512	O00512	BCL9_HUMAN	B-cell CLL/lymphoma 9 protein	0.14166	0.313222	0.118874	0.694952
LAD1	O00515	O00515	LAD1_HUMAN	Ladinin-1	0.0348035	0.199842	0.0728303	0.803958
FAAH	O00519	O00519	FAAH1_HUMAN	Fatty-acid amide hydrolase 1	0.214989	1.10988	0.533093	0.199032
KRIT1	O00522	O00522	KRIT1_HUMAN	Krev interaction trapped protein 1	0.196603	0.611469	0.256071	0.454566
CHL1	O00533	O00533	NCHL1_HUMAN	Neural cell adhesion molecule L1-like protein	1.74861	4.68535	3.06525	0.000458661
VWA5A	O00534	O00534	VMA5A_HUMAN	von Willebrand factor A domain-containing protein 5A	-0.0668735	-0.515175	0.209275	0.525165
PES1	O00541	O00541	PESC_HUMAN	Pescadillo homolog	1.07356	9.41829	5.56138	3.56083e-05
EBAG9	O00559	O00559	RCAS1_HUMAN	Receptor-binding cancer antigen expressed on SiSo cells	0.150006	1.72455	0.938083	0.0650284
SDCBP	O00560	O00560	SDCB1_HUMAN	Syntenin-1	-0.108682	-0.408931	0.160389	0.610517
PITPNM1	O00562	O00562	PITM1_HUMAN	Membrane-associated phosphatidylinositol transfer protein 1	-1.75143	-8.50835	5.16511	2.38095e-05
MPHOSPH10	O00566	O00566	MPP10_HUMAN	U3 small nucleolar ribonucleoprotein protein MPP10	1.53427	3.33925	2.12494	0.00365275
NOP56	O00567	O00567	NOP56_HUMAN	Nucleolar protein 56	1.86183	9.35438	5.53458	3.44828e-05
DDX3X	O00571	O15523;O00571	DDX3X_HUMAN	ATP-dependent RNA helicase DDX3X	-0.0163613	-0.326683	0.124567	0.682561
RNASET2	O00584	O00584	RNT2_HUMAN	Ribonuclease T2	1.43561	4.76084	3.11488	0.000422649
PODXL	O00592	O00592	PODXL_HUMAN	Podocalyxin	4.01607	4.86872	3.18518	0.000376446
PIR	O00625	O00625	PIR_HUMAN	Pirin	-1.04302	-3.87091	2.508	0.00155429
KPNA4	O00629	O00629	IMA3_HUMAN	Importin subunit alpha-3	0.137697	1.2442	0.616549	0.156655
TRIM38	O00635	O00635	TRI38_HUMAN	E3 ubiquitin-protein ligase TRIM38	0.653815	3.19812	2.02127	0.00457883
NFIB	O00712	O00712	NFIB_HUMAN	Nuclear factor 1 B-type	1.02884	8.18074	5.01426	2.03046e-05
PPP6C	O00743	O00743	PPP6_HUMAN	Serine/threonine-protein phosphatase 6 catalytic subunit	0.24929	1.7131	0.930076	0.0663991
CES2	O00748	O00748	EST2_HUMAN	Cocaine esterase	-0.278482	-2.28266	1.34123	0.0230831
MAN2B1	O00754	O00754	MA2B1_HUMAN	Lysosomal alpha-mannosidase	0.155123	0.982967	0.457414	0.248248
UBE2C	O00762	O00762	UBE2C_HUMAN	Ubiquitin-conjugating enzyme E2 C	0	NaN	NaN	1
PDXK	O00764	O00764	PDXK_HUMAN	Pyridoxal kinase	0.874086	5.57057	3.62488	0.000135279
DLGAP1	O14490	O14490	DLGP1_HUMAN	Disks large-associated protein 1	1.26232	6.63506	4.2353	4.71513e-05
ARID1A	O14497	O14497	ARI1A_HUMAN	AT-rich interactive domain-containing protein 1A	0.75153	8.24063	5.04218	2.08333e-05
C2CD2L	O14523	O14523	C2C2L_HUMAN	Phospholipid transfer protein C2CD2L	-2.00667	-8.78392	5.28854	2.7027e-05
NEMP1	O14524	O14524	NEMP1_HUMAN	Nuclear envelope integral membrane protein 1	-0.784401	-4.86741	3.18433	0.00037835
TXNDC9	O14530	O14530	TXND9_HUMAN	Thioredoxin domain-containing protein 9	-0.235012	-1.08495	0.517973	0.208001
DPYSL4	O14531	O14531	DPYL4_HUMAN	Dihydropyrimidinase-related protein 4	-0.622991	-0.842455	0.377552	0.315166
TRAFD1	O14545	O14545	TRAD1_HUMAN	TRAF-type zinc finger domain-containing protein 1	0.389243	1.76975	0.969821	0.0596525
COX7A2L	O14548	O14548	COX7R_HUMAN	Cytochrome c oxidase subunit 7A-related protein, mitochondrial	-0.110892	-0.622567	0.261614	0.446806
HSPB6	O14558	O14558	HSPB6_HUMAN	Heat shock protein beta-6	1.12718	1.81404	1.00112	0.0548415
NDUFAB1	O14561	O14561	ACPM_HUMAN	Acyl carrier protein, mitochondrial	-0.0614062	-0.714905	0.3089	0.387215
UBFD1	O14562	O14562	UBFD1_HUMAN	Ubiquitin domain-containing protein UBFD1	0.874777	6.63228	4.23379	4.70588e-05
CIT	O14578	O14578	CTRO_HUMAN	Citron Rho-interacting kinase	0	NaN	NaN	1
COPE	O14579	O14579	COPE_HUMAN	Coatomer subunit epsilon	0.200957	3.13161	1.97219	0.00518326
EIF1AX;EIF1AY	O14602;P47813	O14602;P47813	IF1AX_HUMAN;IF1AY_HUMAN	Eukaryotic translation initiation factor 1A, Y-chromosomal	1.13152	7.82283	4.84409	1.80995e-05
KDM6A;UTY	O14607;O15550	O14607;O15550	KDM6A_HUMAN;UTY_HUMAN	Histone demethylase UTY	0.386249	1.06793	0.507723	0.214466
AP3D1	O14617	O14617	AP3D1_HUMAN	AP-3 complex subunit delta-1	0.274241	3.98686	2.58968	0.00133072
CCS	O14618	O14618	CCS_HUMAN	Copper chaperone for superoxide dismutase	1.13617	12.6635	6.75489	0.000164384
ABLIM1	O14639	O14639	ABLM1_HUMAN	Actin-binding LIM protein 1	1.34103	9.59871	5.63626	3.72671e-05
DVL1;DVL1P1	O14640;P54792	P54792;O14640	DVL1_HUMAN;DVLP1_HUMAN	Segment polarity protein dishevelled homolog DVL-1	-0.146457	-0.759265	0.332346	0.360175
DNALI1	O14645	O14645	IDLC_HUMAN	Axonemal dynein light intermediate polypeptide 1	-2.77499	-4.94982	3.23756	0.000365199
CHD2	O14647	Q8TD26;Q9HCK8;Q3L8U1;O14647;Q9P2D1;O14646	CHD2_HUMAN	Chromodomain-helicase-DNA-binding protein 2	0.461035	5.57095	3.62512	0.000135368
GOSR2	O14653	O14653	GOSR2_HUMAN	Golgi SNAP receptor complex member 2	-0.412366	-1.43971	0.743496	0.110449
TOR1A	O14656	O14656	TOR1A_HUMAN	Torsin-1A	0.515855	6.357	4.08213	5.33333e-05
TOR1B	O14657	O14657	TOR1B_HUMAN	Torsin-1B	-0.0619816	-0.643675	0.27224	0.432852
STX16	O14662	O14662	STX16_HUMAN	Syntaxin-16	0.100257	0.831333	0.371416	0.320981
ADAM10	O14672	O14672	ADA10_HUMAN	Disintegrin and metalloproteinase domain-containing protein 10	0.133936	1.04197	0.492199	0.224597
ABCD4	O14678	O14678	ABCD4_HUMAN	Lysosomal cobalamin transporter ABCD4	0.737307	1.97154	1.11381	0.0411817
KMT2D	O14686	O14686	KMT2D_HUMAN	Histone-lysine N-methyltransferase 2D	0.802445	2.82032	1.7411	0.00898379
APAF1	O14727	O14727	APAF_HUMAN	Apoptotic protease-activating factor 1	0.496775	2.09003	1.1998	0.0330727
MAP2K7	O14733	O14733	MP2K7_HUMAN	Dual specificity mitogen-activated protein kinase kinase 7	0.946072	3.63035	2.33631	0.00219268
ACOT8	O14734	O14734	ACOT8_HUMAN	Acyl-coenzyme A thioesterase 8	-0.605597	-4.74888	3.10704	0.000426345
CDIPT	O14735	O14735	CDIPT_HUMAN	CDP-diacylglycerol--inositol 3-phosphatidyltransferase	1.39572	9.04558	5.40294	2.98507e-05
PDCD5	O14737	O14737	PDCD5_HUMAN	Programmed cell death protein 5	0.731816	8.32817	5.08271	2.17786e-05
PRMT5	O14744	O14744	ANM5_HUMAN	Protein arginine N-methyltransferase 5	0.606703	5.98166	3.86844	8.68217e-05
NHERF1	O14745	O14745	NHRF1_HUMAN	Na(+)/H(+) exchange regulatory cofactor NHE-RF1	-0.489598	-4.08627	2.65912	0.00113455
FPGT	O14772	O14772	FPGT_HUMAN	Fucose-1-phosphate guanylyltransferase	-0.0163876	-0.0748519	0.0260373	0.926029
TPP1	O14773	O14773	TPP1_HUMAN	Tripeptidyl-peptidase 1	-1.08199	-7.59794	4.73416	1.65062e-05
TCERG1	O14776	O14776	TCRG1_HUMAN	Transcription elongation regulator 1	0.551895	6.13728	3.95802	7.6222e-05
NDC80	O14777	O14777	NDC80_HUMAN	Kinetochore protein NDC80 homolog	0	NaN	NaN	1
NRP1	O14786	O14786	NRP1_HUMAN	Neuropilin-1	0.88066	4.76636	3.1185	0.000420518
TNPO2	O14787	O14787	TNPO2_HUMAN	Transportin-2	0.319423	3.32463	2.11423	0.00373936
POLR3A	O14802	O14802	RPC1_HUMAN	DNA-directed RNA polymerase III subunit RPC1	0.534122	5.1174	3.34448	0.00028169
PSMA7	O14818	O14818	PSA7_HUMAN	Proteasome subunit alpha type-7	0.281958	3.80852	2.46376	0.00168578
SCAMP3	O14828	O14828	SCAM3_HUMAN	Secretory carrier-associated membrane protein 3	0.867657	7.70804	4.78827	1.70455e-05
OPLAH	O14841	O14841	OPLA_HUMAN	5-oxoprolinase	2.50961	4.95892	3.24341	0.000366379
BCKDK	O14874	O14874	BCKD_HUMAN	[3-methyl-2-oxobutanoate dehydrogenase [lipoamide]] kinase, mitochondrial	0.172775	1.23272	0.609289	0.159802
IFIT3	O14879	O14879	IFIT3_HUMAN	Interferon-induced protein with tetratricopeptide repeats 3	0.352992	2.96029	1.84524	0.0070277
MGST3	O14880	O14880	MGST3_HUMAN	Glutathione S-transferase 3, mitochondrial	-0.719359	-3.87039	2.50763	0.00155371
GEMIN2	O14893	O14893	GEMI2_HUMAN	Gem-associated protein 2	0.702769	2.5435	1.53481	0.0145268
IRF6	O14896	O14896	IRF6_HUMAN	Interferon regulatory factor 6	-0.868499	-5.12212	3.34746	0.000277339
TAX1BP3	O14907	O14907	TX1B3_HUMAN	Tax1-binding protein 3	0.89335	6.17428	3.97912	7.38255e-05
GIPC1	O14908	Q8TF64;O14908	GIPC1_HUMAN	PDZ domain-containing protein GIPC1	-0.200501	-1.37666	0.701902	0.123425
IKBKB	O14920	O14920	IKKB_HUMAN	Inhibitor of nuclear factor kappa-B kinase subunit beta	0.335951	4.47001	2.92176	0.000656221
RGS12	O14924	O14924	RGS12_HUMAN	Regulator of G-protein signaling 12	-0.565596	-6.22756	4.00935	7.49574e-05
TIMM23	O14925	O14925;Q5SRD1	TIM23_HUMAN	Mitochondrial import inner membrane translocase subunit Tim23	-0.024773	-0.231656	0.0854048	0.7725
HAT1	O14929	O14929	HAT1_HUMAN	Histone acetyltransferase type B catalytic subunit	-0.355114	-1.42835	0.735961	0.112727
UBE2L6	O14933	O14933	UB2L6_HUMAN	Ubiquitin/ISG15-conjugating enzyme E2 L6	0.573071	4.30637	2.81083	0.000815232
CASK	O14936	O14936	CSKP_HUMAN	Peripheral plasma membrane protein CASK	0.254609	2.75744	1.69425	0.00994809
PLD2	O14939	O14939	PLD2_HUMAN	Phospholipase D2	0.381281	2.13128	1.22993	0.0306208
UQCRQ	O14949	O14949	QCR8_HUMAN	Cytochrome b-c1 complex subunit 8	0.294508	2.1858	1.26989	0.027638
MYL12A;MYL12B	O14950;P19105	P19105;O14950	ML12A_HUMAN;ML12B_HUMAN	Myosin regulatory light chain 12B	0.425906	4.28985	2.79953	0.00083757
HGS	O14964	O14964	HGS_HUMAN	Hepatocyte growth factor-regulated tyrosine kinase substrate	0.182078	2.53068	1.52526	0.0148605
CLGN	O14967	O14967	CLGN_HUMAN	Calmegin	-1.81392	-5.16471	3.37435	0.000255613
VPS26C	O14972	O14972	VP26C_HUMAN	Vacuolar protein sorting-associated protein 26C	0.444838	1.23903	0.613273	0.158097
PPP1R12A	O14974	O14974	MYPT1_HUMAN	Protein phosphatase 1 regulatory subunit 12A	0.254883	2.33556	1.38035	0.0210005
SLC27A2	O14975	O14975	S27A2_HUMAN	Long-chain fatty acid transport protein 2	-2.35486	-12.1261	6.57712	0.000129032
GAK	O14976	O14976	GAK_HUMAN	Cyclin-G-associated kinase	0.487243	8.17235	5.01033	2.01342e-05
HNRNPDL	O14979	O14979	HNRDL_HUMAN	Heterogeneous nuclear ribonucleoprotein D-like	0.497929	3.87968	2.51421	0.00153437
XPO1	O14980	O14980	XPO1_HUMAN	Exportin-1	0.355716	5.14621	3.36268	0.000255562
BTAF1	O14981	O14981	BTAF1_HUMAN	TATA-binding protein-associated factor 172	-0.333449	-3.69066	2.37962	0.00198631
SPTBN2	O15020	O15020	SPTN2_HUMAN	Spectrin beta chain, non-erythrocytic 2	0.693363	4.83803	3.16525	0.000397917
MAST4	O15021	O15021	MAST4_HUMAN	Microtubule-associated serine/threonine-protein kinase 4	0.646848	3.42706	2.18907	0.00313237
SEC16A	O15027	O15027	SC16A_HUMAN	Protein transport protein Sec16A	0.136409	1.84132	1.02049	0.0522402
PLXNB2	O15031	O15031	PLXB2_HUMAN	Plexin-B2	0.259307	4.83829	3.16543	0.000398124
U2SURP	O15042	O15042	SR140_HUMAN	U2 snRNP-associated SURP motif-containing protein	0.621178	7.66169	4.76556	1.67598e-05
SETD1A	O15047	O15047	SET1A_HUMAN	Histone-lysine N-methyltransferase SETD1A	0.771808	3.18132	2.00889	0.00471811
SYNJ2	O15056	O15056	SYNJ2_HUMAN	Synaptojanin-2	0.408064	1.84555	1.0235	0.0518279
SYNM	O15061	O15061	SYNEM_HUMAN	Synemin	0.0989797	0.130186	0.0462399	0.870672
KIF3B	O15066	O15066	KIF3B_HUMAN	Kinesin-like protein KIF3B	-0.806894	-6.01279	3.88647	8.15686e-05
PFAS	O15067	O15067	PUR4_HUMAN	Phosphoribosylformylglycinamidine synthase	1.16179	15.342	7.55056	0
DCLK1	O15075	O15075	DCLK1_HUMAN	Serine/threonine-protein kinase DCLK1	-0.885113	-2.0231	1.15111	0.0374777
CEP290	O15078	O15078	CE290_HUMAN	Centrosomal protein of 290 kDa	-1.37382	-4.24832	2.77109	0.000898723
ANKRD28	O15084	Q8N8A2;O15084	ANR28_HUMAN	Serine/threonine-protein phosphatase 6 regulatory ankyrin repeat subunit A	0.479985	3.76177	2.43047	0.00178283
ARHGEF11	O15085	O15085	ARHGB_HUMAN	Rho guanine nucleotide exchange factor 11	0.433668	2.80235	1.72772	0.00920938
PRORP	O15091	O15091	MRPP3_HUMAN	Mitochondrial ribonuclease P catalytic subunit	-0.0861779	-0.829712	0.370524	0.321756
LSM1	O15116	O15116	LSM1_HUMAN	U6 snRNA-associated Sm-like protein LSm1	0.203803	2.38758	1.41889	0.0191766
NPC1	O15118	O15118	NPC1_HUMAN	NPC intracellular cholesterol transporter 1	-0.740364	-1.54934	0.817177	0.090057
DEGS1	O15121	O15121	DEGS1_HUMAN	Sphingolipid delta(4)-desaturase DES1	0.515393	2.82104	1.74165	0.00897156
SCAMP1	O15126	O15126	SCAM1_HUMAN	Secretory carrier-associated membrane protein 1	-0.316276	-2.53072	1.52529	0.0148644
SCAMP2	O15127	O15127	SCAM2_HUMAN	Secretory carrier-associated membrane protein 2	0.200126	2.63639	1.60401	0.0124133
ARPC1B	O15143	O15143	ARC1B_HUMAN	Actin-related protein 2/3 complex subunit 1B	0.305623	2.84288	1.75791	0.00863441
ARPC2	O15144	O15144	ARPC2_HUMAN	Actin-related protein 2/3 complex subunit 2	0.389378	7.24887	4.55874	2.44499e-05
ARPC3	O15145	O15145	ARPC3_HUMAN	Actin-related protein 2/3 complex subunit 3	0.419003	8.20995	5.0279	2.06186e-05
BET1	O15155	O15155	BET1_HUMAN	BET1 homolog	0.697668	2.37678	1.41089	0.0195121
POLR1C	O15160	O15160	RPAC1_HUMAN	DNA-directed RNA polymerases I and III subunit RPAC1	0.649849	7.73772	4.80276	1.74165e-05
TRIM24	O15164	O15164	TIF1A_HUMAN	Transcription intermediary factor 1-alpha	1.14189	2.61127	1.58529	0.0129357
PGRMC2	O15173	O15173	PGRC2_HUMAN	Membrane-associated progesterone receptor component 2	0.823648	9.20072	5.46952	3.21716e-05
CETN3	O15182	O15182	CETN3_HUMAN	Centrin-3	-1.28527	-6.44369	4.13035	5.54017e-05
VILL	O15195	O15195	VILL_HUMAN	Villin-like protein	-0.609081	-2.03702	1.16121	0.0365059
RGL2	O15211	O15211	RGL2_HUMAN	Ral guanine nucleotide dissociation stimulator-like 2	-0.502852	-0.940594	0.432881	0.266917
PFDN6	O15212	O15212	PFD6_HUMAN	Prefoldin subunit 6	0.258811	5.8323	3.78111	0.000108984
WDR46	O15213	O15213	WDR46_HUMAN	WD repeat-containing protein 46	0.998576	3.7208	2.40121	0.0018939
NKRF	O15226	O15226	NKRF_HUMAN	NF-kappa-B-repressing factor	1.25361	3.77519	2.44003	0.00176436
GNPAT	O15228	O15228	GNPAT_HUMAN	Dihydroxyacetone phosphate acyltransferase	0.246645	0.441285	0.174967	0.584198
LAMA5	O15230	O15230	LAMA5_HUMAN	Laminin subunit alpha-5	0.591018	2.75993	1.69611	0.00990338
ZNF185	O15231	O15231	ZN185_HUMAN	Zinc finger protein 185	1.45767	6.74377	4.29403	4.46701e-05
CASC3	O15234	O15234	CASC3_HUMAN	Protein CASC3	0.774185	1.93535	1.08773	0.0439991
MRPS12	O15235	O15235	RT12_HUMAN	Small ribosomal subunit protein uS12m	0.119735	1.02281	0.480822	0.231987
ACOX3	O15254	O15254	ACOX3_HUMAN	Peroxisomal acyl-coenzyme A oxidase 3	-0.340603	-2.46265	1.47465	0.0167573
RER1	O15258	O15258	RER1_HUMAN	Protein RER1	-0.0133379	-0.136035	0.048423	0.864871
NPHP1	O15259	O15259	NPHP1_HUMAN	Nephrocystin-1	-2.14474	-4.87912	3.19192	0.000371308
MAPK13	O15264	O15264	MK13_HUMAN	Mitogen-activated protein kinase 13	0.2368	2.03322	1.15846	0.0367446
SPTLC1	O15269	O15269	SPTC1_HUMAN	Serine palmitoyltransferase 1	0.336789	4.72575	3.09186	0.000424303
SPTLC2	O15270	O15270	SPTC2_HUMAN	Serine palmitoyltransferase 2	0.44163	3.69212	2.38067	0.00197837
OGT	O15294	O15294	OGT1_HUMAN	UDP-N-acetylglucosamine--peptide N-acetylglucosaminyltransferase 110 kDa subunit	0.454824	4.72287	3.08996	0.000423459
PMM2	O15305	O15305	PMM2_HUMAN	Phosphomannomutase 2	0.884843	4.96743	3.24888	0.000358338
TM9SF1	O15321	O15321	TM9S1_HUMAN	Transmembrane 9 superfamily member 1	-0.841795	-7.49664	4.68387	1.6e-05
INPP4B	O15327	O15327	INP4B_HUMAN	Inositol polyphosphate 4-phosphatase type II	-1.57857	-2.65931	1.6211	0.0119464
MID1	O15344	O15344	TRI18_HUMAN	E3 ubiquitin-protein ligase Midline-1	-0.545805	-3.36301	2.14233	0.00350265
HMGB3	O15347	O15347	HMGB3_HUMAN	High mobility group protein B3	1.04222	5.35716	3.49441	0.000189422
PPM1G	O15355	O15355	PPM1G_HUMAN	Protein phosphatase 1G	0.259988	2.13482	1.23252	0.0304457
INPPL1	O15357	O15357	SHIP2_HUMAN	Phosphatidylinositol 3,4,5-trisphosphate 5-phosphatase 2	0.476278	4.60945	3.015	0.000538462
EIF3D	O15371	O15371	EIF3D_HUMAN	Eukaryotic translation initiation factor 3 subunit D	0.500355	5.34026	3.48396	0.000203681
EIF3H	O15372	O15372	EIF3H_HUMAN	Eukaryotic translation initiation factor 3 subunit H	0.440172	5.70093	3.70322	0.000119527
HDAC3	O15379	O15379	HDAC3_HUMAN	Histone deacetylase 3	0.602439	4.55644	2.97969	0.000587678
NVL	O15381	O15381	NVL_HUMAN	Nuclear valosin-containing protein-like	0.142328	0.781666	0.344361	0.347801
BCAT2	O15382	O15382	BCAT2_HUMAN	Branched-chain-amino-acid aminotransferase, mitochondrial	0.203784	1.38485	0.70727	0.121645
IPO8	O15397	O15397	IPO8_HUMAN	Importin-8	0.417506	4.64114	3.03603	0.000507289
STX7	O15400	O15400	STX7_HUMAN	Syntaxin-7	-0.146627	-1.40621	0.72132	0.117392
TNRC18	O15417	O15417	TNC18_HUMAN	Trinucleotide repeat-containing gene 18 protein	0.768433	6.12062	3.9485	7.88825e-05
ABCC4	O15439	O15439	MRP4_HUMAN	ATP-binding cassette sub-family C member 4	1.21427	6.93619	4.39644	3.0303e-05
POLR1G	O15446	O15446	RPA34_HUMAN	DNA-directed RNA polymerase I subunit RPA34	2.07025	13.6037	7.05026	0
TLR3	O15455	O15455	TLR3_HUMAN	Toll-like receptor 3	0.0427557	0.0941909	0.0330055	0.905521
P4HA2	O15460	O15460	P4HA2_HUMAN	Prolyl 4-hydroxylase subunit alpha-2	-0.653891	-4.83853	3.16558	0.000398332
CAPN5	O15484	O15484	CAN5_HUMAN	Calpain-5	0.0684497	0.415953	0.16353	0.604553
YKT6	O15498	O15498	YKT6_HUMAN	Synaptobrevin homolog YKT6	0.661055	4.72797	3.09331	0.000424938
NUP42	O15504	O15504	NUP42_HUMAN	Nucleoporin NUP42	0.393452	1.86449	1.03699	0.0499831
ARPC5	O15511	O15511	ARPC5_HUMAN	Actin-related protein 2/3 complex subunit 5	0.931529	10.1464	5.85666	4.95868e-05
PDPK1	O15530	Q6A1A2;O15530	PDPK1_HUMAN	3-phosphoinositide-dependent protein kinase 1	-0.401721	-2.45441	1.46852	0.0169889
TAPBP	O15533	O15533	TPSN_HUMAN	Tapasin	0.00146365	0.00861441	0.00292122	0.991452
CLDN3	O15551	P56747;O14493;O15551;O95484	CLD3_HUMAN	Claudin-3	-0.653017	-3.68016	2.37209	0.0020194
DHX15	O43143	O43143	DHX15_HUMAN	ATP-dependent RNA helicase DHX15	0.346697	4.24271	2.76723	0.000915888
RNMT	O43148	O43148	MCES_HUMAN	mRNA cap guanine-N7 methyltransferase	0.696121	12.9453	6.84542	0.0001875
ZZEF1	O43149	O43149	ZZEF1_HUMAN	Zinc finger ZZ-type and EF-hand domain-containing protein 1	-0.115824	-1.4486	0.749414	0.108655
ASAP2	O43150	O43150	ASAP2_HUMAN	Arf-GAP with SH3 domain, ANK repeat and PH domain-containing protein 2	0.788846	4.14349	2.69882	0.00104125
TTI1	O43156	O43156	TTI1_HUMAN	TELO2-interacting protein 1 homolog	0.492514	0.615887	0.258274	0.45149
PLXNB1	O43157	O43157	PLXB1_HUMAN	Plexin-B1	-0.214488	-2.47208	1.48166	0.0164426
RRP8	O43159	O43159	RRP8_HUMAN	Ribosomal RNA-processing protein 8	0.952206	7.51712	4.69408	1.60858e-05
SIPA1L1	O43166	O43166	SI1L1_HUMAN	Signal-induced proliferation-associated 1-like protein 1	0.212966	0.906494	0.413417	0.282876
CYB5B	O43169	O43169	CYB5B_HUMAN	Cytochrome b5 type B	0.027818	0.20876	0.0763278	0.794943
PRPF4	O43172	O43172	PRP4_HUMAN	U4/U6 small nuclear ribonucleoprotein Prp4	0.332009	3.99426	2.59486	0.00131341
PHGDH	O43175	O43175	SERA_HUMAN	D-3-phosphoglycerate dehydrogenase	0.456227	1.87446	1.0441	0.049025
NDUFS4	O43181	O43181	NDUS4_HUMAN	NADH dehydrogenase [ubiquinone] iron-sulfur protein 4, mitochondrial	0.426028	3.13166	1.97223	0.00518486
ARHGAP6	O43182	O43182	RHG06_HUMAN	Rho GTPase-activating protein 6	1.21026	1.83443	1.01559	0.0529526
PHF1	O43189	O43189	PHF1_HUMAN	PHD finger protein 1	0.259931	0.780438	0.3437	0.34842
GPR39	O43194	O43194	GPR39_HUMAN	G-protein coupled receptor 39	-0.643711	-4.18228	2.72564	0.000988745
DYNC1LI2	O43237	O43237	DC1L2_HUMAN	Cytoplasmic dynein 1 light intermediate chain 2	0.158815	2.82389	1.74376	0.00894386
KLK10	O43240	O43240	KLK10_HUMAN	Kallikrein-10	0.140731	0.472351	0.18922	0.559024
PSMD3	O43242	O43242	PSMD3_HUMAN	26S proteasome non-ATPase regulatory subunit 3	0.219495	4.36627	2.85162	0.000786127
RBFOX2	O43251	O43251	RFOX2_HUMAN	RNA binding protein fox-1 homolog 2	1.05918	14.9221	7.43465	0
PAPSS1	O43252	O43252	PAPS1_HUMAN	Bifunctional 3'-phosphoadenosine 5'-phosphosulfate synthase 1	-0.0296985	-0.18329	0.0663945	0.820001
ZW10	O43264	O43264	ZW10_HUMAN	Centromere/kinetochore protein zw10 homolog	0.184311	2.05581	1.17487	0.0351763
PRODH	O43272	O43272	PROD_HUMAN	Proline dehydrogenase 1, mitochondrial	-1.98973	-3.76063	2.42966	0.00178658
SPINT1	O43278	O43278	SPIT1_HUMAN	Kunitz-type protease inhibitor 1	0.338431	2.3855	1.41735	0.0192238
B4GALT5	O43286	O43286	B4GT5_HUMAN	Beta-1,4-galactosyltransferase 5	0.324472	1.01914	0.478652	0.233328
SART1	O43290	O43290	SNUT1_HUMAN	U4/U6.U5 tri-snRNP-associated protein 1	0.247487	3.82801	2.4776	0.00163534
SPINT2	O43291	O43291	SPIT2_HUMAN	Kunitz-type protease inhibitor 2	0.447387	1.53513	0.807538	0.0923433
GPAA1	O43292	O43292	GPAA1_HUMAN	Glycosylphosphatidylinositol anchor attachment 1 protein	0.0517633	0.60588	0.253292	0.45873
DAPK3	O43293	O43293	DAPK3_HUMAN	Death-associated protein kinase 3	0.830447	1.42435	0.733311	0.113529
TGFB1I1	O43294	O43294	TGFI1_HUMAN	Transforming growth factor beta-1-induced transcript 1 protein	0.0715365	0.178743	0.0646392	0.824464
SRGAP3	O43295	O43295	SRGP3_HUMAN	SLIT-ROBO Rho GTPase-activating protein 3	-0.00886464	-0.114608	0.04047	0.885935
AP5Z1	O43299	O43299	AP5Z1_HUMAN	AP-5 complex subunit zeta-1	-0.538256	-5.78028	3.75039	0.00011223
HSPA12A	O43301	O43301	HS12A_HUMAN	Heat shock 70 kDa protein 12A	0.485141	1.98469	1.1233	0.0401548
CCP110	O43303	O43303	CP110_HUMAN	Centriolar coiled-coil protein of 110 kDa	-2.2003	-4.48515	2.93194	0.000645997
PPIP5K2	O43314	O43314	VIP2_HUMAN	Inositol hexakisphosphate and diphosphoinositol-pentakisphosphate kinase 2	1.04015	2.76164	1.69738	0.00988591
MAP3K7	O43318	O43318	M3K7_HUMAN	Mitogen-activated protein kinase kinase kinase 7	0.359422	1.99997	1.13436	0.039055
EEF1E1	O43324	O43324	MCA3_HUMAN	Eukaryotic translation elongation factor 1 epsilon-1	0.117053	1.66798	0.898657	0.0722292
MSI1	O43347	O43347	MSI1H_HUMAN	RNA-binding protein Musashi homolog 1	0.327184	1.33889	0.677274	0.132184
HNRNPR	O43390	O43390	HNRPR_HUMAN	Heterogeneous nuclear ribonucleoprotein R	0.806712	7.76813	4.81757	1.76991e-05
PRPF3	O43395	O43395	PRPF3_HUMAN	U4/U6 small nuclear ribonucleoprotein Prp3	0.263225	2.81084	1.73404	0.00910482
TXNL1	O43396	O43396	TXNL1_HUMAN	Thioredoxin-like protein 1	0.617014	5.815	3.77092	0.00011103
TPD52L2	O43399	O43399	TPD54_HUMAN	Tumor protein D54	1.09391	11.723	6.43916	0.000105263
EMC8	O43402	O43402	EMC8_HUMAN	ER membrane protein complex subunit 8	0.341991	6.29267	4.04608	6.62021e-05
ERI3	O43414	O43414	ERI3_HUMAN	ERI1 exoribonuclease 3	0.512631	2.57583	1.55889	0.0138897
THAP12	O43422	O43422	P52K_HUMAN	52 kDa repressor of the inhibitor of the protein kinase	-0.246901	-1.3867	0.708483	0.121294
FIBP	O43427	O43427	FIBP_HUMAN	Acidic fibroblast growth factor intracellular-binding protein	0.339302	3.75578	2.4262	0.00179876
EIF4G3	O43432	O43432	IF4G3_HUMAN	Eukaryotic translation initiation factor 4 gamma 3	-0.560821	-13.827	7.11769	0
PPIH	O43447	O43447	PPIH_HUMAN	Peptidyl-prolyl cis-trans isomerase H	0.501314	6.66486	4.25147	4.36075e-05
HTRA2	O43464	O43464;P83110	HTRA2_HUMAN	Serine protease HTRA2, mitochondrial	-0.469355	-4.82397	3.15611	0.000401039
AKR7A2	O43488	O43488	ARK72_HUMAN	Aflatoxin B1 aldehyde reductase member 2	0.160583	1.70662	0.925551	0.0671758
EPB41L2	O43491	O43491	E41L2_HUMAN	Band 4.1-like protein 2	1.04274	3.06045	1.91954	0.00588086
TGOLN2	O43493	O43493	TGON2_HUMAN	Trans-Golgi network integral membrane protein 2	0.0720732	0.271946	0.101716	0.733655
B4GAT1	O43505	O43505	B4GA1_HUMAN	Beta-1,4-glucuronyltransferase 1	0.0212344	0.0634792	0.0219858	0.935917
WIPF1	O43516	O43516	WIPF1_HUMAN	WAS/WASL-interacting protein family member 1	0.563811	1.1478	0.556318	0.185859
ATP8B1	O43520	O43520	AT8B1_HUMAN	Phospholipid-transporting ATPase IC	0.261774	1.96195	1.10689	0.0418003
BCL2L11	O43521	O43521	B2L11_HUMAN	Bcl-2-like protein 11	-0.183455	-0.390676	0.152286	0.626822
FOXO3	O43524	O43524	FOXO3_HUMAN	Forkhead box protein O3	0.662551	2.6419	1.60812	0.012303
RGS14	O43566	O43566	RGS14_HUMAN	Regulator of G-protein signaling 14	-1.01077	-2.61781	1.59017	0.0127885
AKAP10	O43572	O43572	AKA10_HUMAN	A-kinase anchor protein 10, mitochondrial	-0.150745	-1.96236	1.10718	0.0417948
DENR	O43583	O43583	DENR_HUMAN	Density-regulated protein	0.113027	1.2161	0.598815	0.164382
XPOT	O43592	O43592	XPOT_HUMAN	Exportin-T	0.432589	5.74791	3.73119	0.000118812
DNPH1	O43598	O43598	DNPH1_HUMAN	2'-deoxynucleoside 5'-phosphate N-hydrolase 1	0.347021	2.50329	1.50487	0.0155864
TIMM44	O43615	O43615	TIM44_HUMAN	Mitochondrial import inner membrane translocase subunit TIM44	0.275754	2.20028	1.28054	0.0268766
TRAPPC3	O43617	O43617	TPPC3_HUMAN	Trafficking protein particle complex subunit 3	-0.453034	-4.20978	2.7446	0.000955827
CHMP2A	O43633	O43633	CHM2A_HUMAN	Charged multivesicular body protein 2a	-0.13125	-1.75948	0.962588	0.0607706
NCK2	O43639	O43639	NCK2_HUMAN	Cytoplasmic protein NCK2	0.0537638	0.329443	0.12574	0.680097
PLRG1	O43660	O43660	PLRG1_HUMAN	Pleiotropic regulator 1	0.425328	3.79922	2.45715	0.00170708
PRC1	O43663	O43663	PRC1_HUMAN	Protein regulator of cytokinesis 1	0	NaN	NaN	1
RGS10	O43665	O43665	RGS10_HUMAN	Regulator of G-protein signaling 10	0.27828	1.14603	0.555225	0.18647
ZNF207	O43670	O43670	ZN207_HUMAN	BUB3-interacting and GLEBS motif-containing protein ZNF207	0.657107	5.67071	3.68515	0.000137552
NDUFB5	O43674	O43674	NDUB5_HUMAN	NADH dehydrogenase [ubiquinone] 1 beta subcomplex subunit 5, mitochondrial	0.116863	1.0707	0.509386	0.213574
NDUFB3	O43676	O43676	NDUB3_HUMAN	NADH dehydrogenase [ubiquinone] 1 beta subcomplex subunit 3	0.245762	4.88622	3.19652	0.00036767
NDUFA2	O43678	O43678	NDUA2_HUMAN	NADH dehydrogenase [ubiquinone] 1 alpha subcomplex subunit 2	0.110262	1.54202	0.812209	0.0912595
GET3	O43681	O43681	GET3_HUMAN	ATPase GET3	-0.0731583	-0.85992	0.387242	0.306313
BUB3	O43684	O43684	BUB3_HUMAN	Mitotic checkpoint protein BUB3	0.679405	6.60721	4.22015	4.68293e-05
PLPP2	O43688	O43688	PLPP2_HUMAN	Phospholipid phosphatase 2	-1.97036	-4.14323	2.69864	0.00104082
ACTN4	O43707	O43707	ACTN4_HUMAN	Alpha-actinin-4	0.141656	1.61918	0.864938	0.0787962
GSTZ1	O43708	O43708	MAAI_HUMAN	Maleylacetoacetate isomerase	0.752639	3.1223	1.96531	0.00525912
BUD23	O43709	O43709	BUD23_HUMAN	Probable 18S rRNA (guanine-N(7))-methyltransferase	0.505707	3.16458	1.99654	0.00488429
GATC	O43716	O43716	GATC_HUMAN	Glutamyl-tRNA(Gln) amidotransferase subunit C, mitochondrial	-0.529455	-3.15267	1.98775	0.00497287
HTATSF1	O43719	O43719	HTSF1_HUMAN	HIV Tat-specific factor 1	0.495071	6.45636	4.13736	5.55042e-05
AP1G1	O43747	O43747	AP1G1_HUMAN	AP-1 complex subunit gamma-1	-0.268415	-4.4129	2.88322	0.000718552
STX6	O43752	O43752	STX6_HUMAN	Syntaxin-6	0.385676	3.62398	2.33173	0.00221277
SYNGR2	O43760	O43760	SNG2_HUMAN	Synaptogyrin-2	0.672394	3.1888	2.0144	0.00466625
SGTA	O43765	O43765	SGTA_HUMAN	Small glutamine-rich tetratricopeptide repeat-containing protein alpha	0.506576	4.8487	3.17219	0.000394778
ENSA	O43768	O43768;P56211	ENSA_HUMAN	Alpha-endosulfine	0.133553	1.71276	0.929837	0.0664204
SLC25A20	O43772	O43772	MCAT_HUMAN	Mitochondrial carnitine/acylcarnitine carrier protein	0.639614	4.36189	2.84864	0.000784383
NARS1	O43776	O43776	SYNC_HUMAN	Asparagine--tRNA ligase, cytoplasmic	0.433029	5.83524	3.78285	0.000109064
MYO1B	O43795	O43795	MYO1B_HUMAN	Unconventional myosin-Ib	1.12508	2.58531	1.56594	0.0136395
SSNA1	O43805	O43805	SSNA1_HUMAN	Microtubule nucleation factor SSNA1	-0.954753	-2.10294	1.20921	0.0323627
NUDT21	O43809	O43809	CPSF5_HUMAN	Cleavage and polyadenylation specificity factor subunit 5	0.605887	3.99729	2.59699	0.00131127
LANCL1	O43813	O43813	LANC1_HUMAN	Glutathione S-transferase LANCL1	0.312326	4.38512	2.86441	0.000755835
STRN	O43815	O43815	STRN_HUMAN	Striatin	0.607928	6.31524	4.05875	5.94406e-05
RRP9	O43818	O43818	U3IP2_HUMAN	U3 small nucleolar RNA-interacting protein 2	1.37098	3.44005	2.19853	0.00305277
SCO2	O43819	O43819	SCO2_HUMAN	Protein SCO2 homolog, mitochondrial	0.662559	1.62692	0.870266	0.0776732
CFAP410	O43822	O43822	CF410_HUMAN	Cilia- and flagella-associated protein 410	-0.963316	-8.51035	5.16602	2.38569e-05
AKAP8	O43823	O43823	AKAP8_HUMAN	A-kinase anchor protein 8	0.374506	3.79147	2.45163	0.00172296
GTPBP6	O43824	O43824	GTPB6_HUMAN	Putative GTP-binding protein 6	0.334042	1.82305	1.00751	0.054
IDH3B	O43837	O43837	IDH3B_HUMAN	Isocitrate dehydrogenase [NAD] subunit beta, mitochondrial	-1.07755	-8.59747	5.20537	2.46407e-05
NRDC	O43847	O43847	NRDC_HUMAN	Nardilysin	-0.0102262	-0.0891465	0.0311783	0.910702
CALU	O43852	O43852	CALU_HUMAN	Calumenin	0.898319	4.52522	2.95882	0.000611632
AHCYL1	O43865	O43865	SAHH2_HUMAN	S-adenosylhomocysteine hydrolase-like protein 1	0.294326	2.79806	1.72452	0.00928406
KIF1C	O43896	O43896	KIF1C_HUMAN	Kinesin-like protein KIF1C	1.19478	4.30868	2.8124	0.000812825
ORC5	O43913	O43913	ORC5_HUMAN	Origin recognition complex subunit 5	1.24303	2.86764	1.77634	0.00825929
NDUFS5	O43920	O43920	NDUS5_HUMAN	NADH dehydrogenase [ubiquinone] iron-sulfur protein 5	0.432043	3.41677	2.18158	0.00319113
PDE6D	O43924	O43924	PDE6D_HUMAN	Retinal rod rhodopsin-sensitive cGMP 3',5'-cyclic phosphodiesterase subunit delta	-0.231981	-2.07038	1.18547	0.0342057
ORC4	O43929	O43929	ORC4_HUMAN	Origin recognition complex subunit 4	0.174344	1.80356	0.993696	0.0558842
PEX1	O43933	O43933	PEX1_HUMAN	Peroxisomal ATPase PEX1	-0.462759	-6.25919	4.02723	7.57967e-05
RAD21	O60216	O60216	RAD21_HUMAN	Double-strand-break repair protein rad21 homolog	0.672092	7.22558	4.54683	2.42424e-05
AKR1B10	O60218	O60218	AK1BA_HUMAN	Aldo-keto reductase family 1 member B10	-1.575	-3.34424	2.12859	0.00361409
TIMM8A	O60220	O60220	TIM8A_HUMAN	Mitochondrial import inner membrane translocase subunit Tim8 A	0.535502	4.33579	2.83089	0.000797896
KALRN	O60229	O60229	KALRN_HUMAN	Kalirin	-1.54081	-4.22516	2.75518	0.000944257
DHX16	O60231	O60231	DHX16_HUMAN	Pre-mRNA-splicing factor ATP-dependent RNA helicase DHX16	-0.128398	-2.06107	1.1787	0.0347777
ZNRD2	O60232	O60232	ZNRD2_HUMAN	Protein ZNRD2	-0.138435	-0.760902	0.33322	0.359214
GMFG	O60234	O60234	GMFG_HUMAN	Glia maturation factor gamma	0.369148	0.721691	0.312457	0.383303
HS6ST1	O60243	O60243	H6ST1_HUMAN	Heparan-sulfate 6-O-sulfotransferase 1	0.922731	2.55975	1.54691	0.0141811
MED14	O60244	O60244	MED14_HUMAN	Mediator of RNA polymerase II transcription subunit 14	0.831815	4.34759	2.83892	0.000802823
PCDH7	O60245	O60245	PCDH7_HUMAN	Protocadherin-7	-0.465511	-1.62864	0.87145	0.0774413
PRPSAP2	O60256	O60256	KPRB_HUMAN	Phosphoribosyl pyrophosphate synthase-associated protein 2	0.144229	1.96977	1.11253	0.0413081
GNG7	O60262	O60262	GBG7_HUMAN	Guanine nucleotide-binding protein G(I)/G(S)/G(O) subunit gamma-7	-0.535494	-1.59989	0.851689	0.0817948
SMARCA5	O60264	O60264;P28370	SMCA5_HUMAN	SWI/SNF-related matrix-associated actin-dependent regulator of chromatin subfamily A member 5	0.338066	5.81548	3.7712	0.000111192
SPAG9	O60271	O60271;Q9UPT6	JIP4_HUMAN	C-Jun-amino-terminal kinase-interacting protein 4	-0.078158	-0.776616	0.341643	0.350678
KIF5C	O60282	O60282	KIF5C_HUMAN	Kinesin heavy chain isoform 5C	0	NaN	NaN	1
URB1	O60287	O60287	NPA1P_HUMAN	Nucleolar pre-ribosomal-associated protein 1	1.08599	1.80892	0.997489	0.0553326
SIPA1L3	O60292	O60292	SI1L3_HUMAN	Signal-induced proliferation-associated 1-like protein 3	-0.154177	-0.334051	0.127704	0.675922
LZTS3	O60299	O60299	LZTS3_HUMAN	Leucine zipper putative tumor suppressor 3	0.349942	1.03843	0.490092	0.225798
KATNIP	O60303	O60303	KATIP_HUMAN	Katanin-interacting protein	-2.4877	-8.07938	4.96665	1.97044e-05
AQR	O60306	O60306	AQR_HUMAN	RNA helicase aquarius	0.569945	8.70679	5.25431	2.62009e-05
OPA1	O60313	O60313	OPA1_HUMAN	Dynamin-like 120 kDa protein, mitochondrial	0.00283885	0.0334465	0.0114514	0.966486
MCM3AP	O60318	O60318	GANP_HUMAN	Germinal-center associated nuclear protein	0.598938	2.16852	1.25721	0.028541
KIF1B	O60333	O60333	KIF1B_HUMAN	Kinesin-like protein KIF1B	-0.365693	-1.14096	0.552105	0.18824
KDM1A	O60341	O60341	KDM1A_HUMAN	Lysine-specific histone demethylase 1A	0.480088	5.77729	3.74862	0.000111668
TBC1D4	O60343	O60343	TBCD4_HUMAN	TBC1 domain family member 4	1.11018	7.35822	4.61434	1.52091e-05
FZD6	O60353	O60353	FZD6_HUMAN	Frizzled-6	0.140275	1.16949	0.56972	0.178738
PPL	O60437	O60437	PEPL_HUMAN	Periplakin	0.811883	3.48072	2.22812	0.00285304
GSDME	O60443	O60443	GSDME_HUMAN	Gasdermin-E	0.500231	3.17419	2.00363	0.00478441
LY75	O60449	O60449	LY75_HUMAN	Lymphocyte antigen 75	-0.456406	-3.46079	2.21363	0.00294214
MAN1A2	O60476	O60476	MA1A2_HUMAN	Mannosyl-oligosaccharide 1,2-alpha-mannosidase IB	-0.244055	-2.89357	1.79564	0.00785511
ACSL4	O60488	O60488	ACSL4_HUMAN	Long-chain-fatty-acid--CoA ligase 4	1.18294	2.31815	1.36746	0.0216433
SNX3	O60493	O60493	SNX3_HUMAN	Sorting nexin-3	-0.0824745	-1.07054	0.509294	0.213605
OGA	O60502	O60502	OGA_HUMAN	Protein O-GlcNAcase	0.867656	11.7024	6.43199	0.000104348
SORBS3	O60504	O60504	VINEX_HUMAN	Vinexin	-0.107038	-0.821191	0.365846	0.326473
SYNCRIP	O60506	O60506	HNRPQ_HUMAN	Heterogeneous nuclear ribonucleoprotein Q	0.830912	7.66465	4.76702	1.68539e-05
CDC40	O60508	O60508	PRP17_HUMAN	Pre-mRNA-processing factor 17	0.540142	5.81745	3.77236	0.000108504
RANBP6	O60518	O60518	RNBP6_HUMAN	Ran-binding protein 6	1.19659	1.92616	1.08113	0.0447939
NEMF	O60524	O60524	NEMF_HUMAN	Ribosome quality control complex subunit NEMF	0.226846	2.73012	1.67389	0.0104754
GMDS	O60547	O60547	GMDS_HUMAN	GDP-mannose 4,6 dehydratase	0.131629	1.12528	0.542493	0.193589
NMT2	O60551	O60551	NMT2_HUMAN	Glycylpeptide N-tetradecanoyltransferase 2	-0.145358	-1.26002	0.626586	0.152061
CCNT1	O60563	O60563	CCNT1_HUMAN	Cyclin-T1	-0.411443	-1.03123	0.485812	0.22858
BUB1B	O60566	O60566	BUB1B_HUMAN	Mitotic checkpoint serine/threonine-protein kinase BUB1 beta	-0.482202	-0.921299	0.421837	0.275974
PLOD3	O60568	O60568	PLOD3_HUMAN	Multifunctional procollagen lysine hydroxylase and glycosyltransferase LH3	0.795635	5.89908	3.82032	0.000108679
EIF4E2	O60573	O60573	IF4E2_HUMAN	Eukaryotic translation initiation factor 4E type 2	0.443932	1.41722	0.728595	0.115061
DIAPH1	O60610	O60610	DIAP1_HUMAN	Protein diaphanous homolog 1	0.211457	2.37334	1.40833	0.0196166
SELENOF	O60613	O60613	SEP15_HUMAN	Selenoprotein F	0.236411	2.66422	1.62476	0.0118499
TSPAN1	O60635	O60635	TSN1_HUMAN	Tetraspanin-1	-2.71026	-4.54293	2.97067	0.000604629
TSPAN3	O60637	O60637	TSN3_HUMAN	Tetraspanin-3	-1.10925	-7.27647	4.57283	2.47525e-05
EXOC3	O60645	O60645	EXOC3_HUMAN	Exocyst complex component 3	0.0844052	1.34872	0.683662	0.129938
PLIN3	O60664	O60664	PLIN3_HUMAN	Perilipin-3	-0.0424426	-0.340152	0.130311	0.670583
PRMT3	O60678	O60678	ANM3_HUMAN	Protein arginine N-methyltransferase 3	0.800618	2.51208	1.51141	0.01536
KPNA6	O60684	O60684	IMA7_HUMAN	Importin subunit alpha-7	0.305012	3.44709	2.20366	0.00300373
UGDH	O60701	O60701	UGDH_HUMAN	UDP-glucose 6-dehydrogenase	-0.604365	-4.59413	3.00482	0.000557204
CTNND1	O60716	O60716	CTND1_HUMAN	Catenin delta-1	0.408205	8.89898	5.33918	2.8777e-05
EIF1B	O60739	O60739;P41567	EIF1B_HUMAN	Eukaryotic translation initiation factor 1b	0.0449886	0.308779	0.117005	0.698986
SNX2	O60749	Q13596;O60749	SNX2_HUMAN	Sorting nexin-2	0.285191	3.11236	1.95797	0.00533333
DPM1	O60762	O60762	DPM1_HUMAN	Dolichol-phosphate mannosyltransferase subunit 1	0.484175	6.46179	4.14036	5.55556e-05
USO1	O60763	O60763	USO1_HUMAN	General vesicular transport factor p115	-0.133415	-1.80972	0.998055	0.0552516
MRPS14	O60783	O60783	RT14_HUMAN	Small ribosomal subunit protein uS14m	0.00607971	0.0230073	0.00784558	0.976576
TOM1	O60784	O60784	TOM1_HUMAN	Target of Myb1 membrane trafficking protein	-0.866055	-4.34879	2.83974	0.000803532
H2BC10;H2BC12;H2BC14;H2BC15;H2BC18;H2BC5;H2BC9	O60814;P58876;P62807;Q5QNW6;Q93079;Q99877;Q99879	Q99879;P57053;Q5QNW6;Q16778;O60814;P62807;P23527;P06899;Q99880;Q99877;P33778;Q93079;P58876	H2B1C_HUMAN;H2B1D_HUMAN;H2B1H_HUMAN;H2B1K_HUMAN;H2B1M_HUMAN;H2B1N_HUMAN;H2B2F_HUMAN	Histone H2B type 1-K	0.552419	3.83403	2.48187	0.00162012
PFKFB2	O60825	O60825;Q16875	F262_HUMAN	6-phosphofructo-2-kinase/fructose-2,6-bisphosphatase 2	-1.43512	-3.58906	2.30655	0.00238932
CCDC22	O60826	O60826	CCD22_HUMAN	Coiled-coil domain-containing protein 22	0.183208	3.78567	2.4475	0.00173939
PRAF2	O60831	O60831	PRAF2_HUMAN	PRA1 family protein 2	0.637734	4.23724	2.76348	0.000920339
DKC1	O60832	O60832	DKC1_HUMAN	H/ACA ribonucleoprotein complex subunit DKC1	1.65787	11.0127	6.18562	7.64331e-05
EIF5B	O60841	O60841	IF2P_HUMAN	Eukaryotic translation initiation factor 5B	0.398684	4.67458	3.05815	0.000466896
EDF1	O60869	O60869	EDF1_HUMAN	Endothelial differentiation-related factor 1	0.586975	5.55295	3.61422	0.000134476
KIN	O60870	O60870	KIN17_HUMAN	DNA/RNA-binding protein KIN17	0.443246	1.00186	0.468475	0.240333
DIAPH2	O60879	O60879	DIAP2_HUMAN	Protein diaphanous homolog 2	0.70033	6.48575	4.15359	5.59701e-05
DNAJA2	O60884	O60884	DNJA2_HUMAN	DnaJ homolog subfamily A member 2	-0.0921182	-1.56888	0.830482	0.0867228
BRD4	O60885	Q15059;O60885	BRD4_HUMAN	Bromodomain-containing protein 4	0.736737	9.5695	5.62421	3.69231e-05
CUTA	O60888	O60888	CUTA_HUMAN	Protein CutA	0.927399	6.32849	4.06618	5.98592e-05
SMPD2	O60906	O60906	NSMA_HUMAN	Sphingomyelin phosphodiesterase 2	-2.28406	-10.1193	5.84596	4.87805e-05
HUS1	O60921	O60921	HUS1_HUMAN	Checkpoint protein HUS1	0	NaN	NaN	1
PFDN1	O60925	O60925	PFD1_HUMAN	Prefoldin subunit 1	0.234762	5.73613	3.72419	0.000118393
NBN	O60934	O60934	NBN_HUMAN	Nibrin	0.344934	4.03312	2.62206	0.00122845
NOL3	O60936	O60936	NOL3_HUMAN	Nucleolar protein 3	-0.195837	-0.550414	0.226128	0.498555
DTNB	O60941	O60941	DTNB_HUMAN	Dystrobrevin beta	-0.138027	-0.888563	0.403283	0.291955
RNGTT	O60942	O60942	MCE1_HUMAN	mRNA-capping enzyme	0.389815	1.28143	0.640241	0.146659
ABCB7	O75027	O75027	ABCB7_HUMAN	Iron-sulfur clusters transporter ABCB7, mitochondrial	-0.428529	-2.92559	1.81945	0.00743608
SRGAP2	O75044	O75044;Q7Z6B7	SRGP2_HUMAN	SLIT-ROBO Rho GTPase-activating protein 2	0.0629817	0.400296	0.156545	0.618084
IGSF3	O75054	O75054	IGSF3_HUMAN	Immunoglobulin superfamily member 3	0.0320914	0.0454602	0.0156367	0.953533
FAM20B	O75063	O75063	XYLK_HUMAN	Glycosaminoglycan xylosylkinase	-0.293949	-0.985316	0.458785	0.247235
DENND4B	O75064	O75064	DEN4B_HUMAN	DENN domain-containing protein 4B	0.175771	0.382816	0.148823	0.63369
WDR1	O75083	O75083	WDR1_HUMAN	WD repeat-containing protein 1	0.0824915	1.40457	0.72024	0.117728
SLIT3	O75094	O75094	SLIT3_HUMAN	Slit homolog 3 protein	0.713248	3.0454	1.90839	0.00602713
ATP9A	O75110	O75110	ATP9A_HUMAN	Probable phospholipid-transporting ATPase IIA	-0.417148	-5.30512	3.46217	0.000227053
ROCK2	O75116	O75116	ROCK2_HUMAN	Rho-associated protein kinase 2	0.182614	3.07921	1.93343	0.00571133
CLASP2	O75122	O75122	CLAP2_HUMAN	CLIP-associating protein 2	-0.149016	-2.1299	1.22892	0.0307132
PTCD1	O75127	O75127	PTCD1_HUMAN	Pentatricopeptide repeat-containing protein 1, mitochondrial	-0.0220017	-0.153775	0.0550999	0.848491
COBL	O75128	O75128	COBL_HUMAN	Protein cordon-bleu	1.11383	5.82683	3.77789	0.000108664
CPNE3	O75131	O75131	CPNE3_HUMAN	Copine-3	0.320575	5.36369	3.49845	0.000190123
ICOSLG	O75144	O75144	ICOSL_HUMAN	ICOS ligand	0.364177	0.98711	0.459833	0.246548
HIP1R	O75146	O75146	HIP1R_HUMAN	Huntingtin-interacting protein 1-related protein	-0.0479386	-0.253753	0.0942974	0.750915
OBSL1	O75147	O75147	OBSL1_HUMAN	Obscurin-like protein 1	0.513937	3.41505	2.18032	0.00320484
RNF40	O75150	O75150	BRE1B_HUMAN	E3 ubiquitin-protein ligase BRE1B	0.425135	7.19103	4.5291	2.40385e-05
PHF2	O75151	O75151	PHF2_HUMAN	Lysine-specific demethylase PHF2	0.190104	1.3932	0.712754	0.119859
ZC3H11A	O75152	O75152	ZC11A_HUMAN	Zinc finger CCCH domain-containing protein 11A	0.423057	4.49012	2.93528	0.000645341
CLUH	O75153	O75153	CLU_HUMAN	Clustered mitochondria protein homolog	0.746939	6.88381	4.36876	3.40788e-05
CAND2	O75155	O75155	CAND2_HUMAN	Cullin-associated NEDD8-dissociated protein 2	-1.61083	-4.42826	2.89361	0.000702137
NPHP4	O75161	O75161	NPHP4_HUMAN	Nephrocystin-4	-1.69641	-2.99435	1.87053	0.00662188
KDM4A	O75164	O75164	KDM4A_HUMAN	Lysine-specific demethylase 4A	-0.302987	-0.468078	0.187244	0.562684
DNAJC13	O75165	O75165	DJC13_HUMAN	DnaJ homolog subfamily C member 13	0.424401	7.89705	4.87985	1.86047e-05
PPP6R2	O75170	O75170	PP6R2_HUMAN	Serine/threonine-protein phosphatase 6 regulatory subunit 2	0.322635	4.45014	2.90837	0.000672469
CNOT3	O75175	O75175	CNOT3_HUMAN	CCR4-NOT transcription complex subunit 3	0.226707	3.25702	2.06462	0.00416308
ANKRD17	O75179	O75179;Q8IWZ3	ANR17_HUMAN	Ankyrin repeat domain-containing protein 17	0.43415	5.94008	3.84426	9.46565e-05
SIN3B	O75182	O75182	SIN3B_HUMAN	Paired amphipathic helix protein Sin3b	1.10766	3.11095	1.95692	0.00534276
DNAJB6	O75190	Q8WWF6;O75190	DNJB6_HUMAN	DnaJ homolog subfamily B member 6	-2.36253	-3.98737	2.59003	0.0013302
XYLB	O75191	O75191	XYLB_HUMAN	Xylulose kinase	1.62228	3.496	2.23921	0.00281044
COQ9	O75208	O75208	COQ9_HUMAN	Ubiquinone biosynthesis protein COQ9, mitochondrial	0.511314	5.52746	3.59875	0.000140717
GGCT	O75223	O75223	GGCT_HUMAN	Gamma-glutamylcyclotransferase	0.420004	2.01151	1.14271	0.0382964
NDUFS7	O75251	O75251	NDUS7_HUMAN	NADH dehydrogenase [ubiquinone] iron-sulfur protein 7, mitochondrial	0.40963	6.49358	4.1579	5.61272e-05
NDUFS2	O75306	O75306	NDUS2_HUMAN	NADH dehydrogenase [ubiquinone] iron-sulfur protein 2, mitochondrial	0.307348	4.25935	2.77865	0.000876923
CDH16	O75309	O75309	CAD16_HUMAN	Cadherin-16	0.403833	1.06287	0.504685	0.216502
ZPR1	O75312	O75312	ZPR1_HUMAN	Zinc finger protein ZPR1	0.739027	11.4702	6.35049	9.6e-05
USP12;USP46	O75317;P62068	O75317;P62068	UBP12_HUMAN;UBP46_HUMAN	Ubiquitin carboxyl-terminal hydrolase 12	0.12902	0.748761	0.326752	0.366838
NIPSNAP2	O75323	O75323	NIPS2_HUMAN	Protein NipSnap homolog 2	-0.236689	-1.96544	1.1094	0.0416009
PDCD6	O75340	O75340	PDCD6_HUMAN	Programmed cell death protein 6	0.682177	12.1223	6.57586	0.00012766
TBCA	O75347	O75347	TBCA_HUMAN	Tubulin-specific chaperone A	-0.221429	-2.75098	1.68944	0.010073
ATP6V1G1	O75348	O75348	VATG1_HUMAN	V-type proton ATPase subunit G 1	-0.000637611	-0.003545	0.00119978	0.996302
VPS4B	O75351	O75351	VPS4B_HUMAN	Vacuolar protein sorting-associated protein 4B	0.292393	5.22452	3.41191	0.000245138
MPDU1	O75352	O75352	MPU1_HUMAN	Mannose-P-dolichol utilization defect 1 protein	0.12683	1.46234	0.758571	0.105966
ENTPD5	O75356	O75356	ENTP5_HUMAN	Nucleoside diphosphate phosphatase ENTPD5	0.113936	0.394913	0.154159	0.622886
ZNF217	O75362	O75362	ZN217_HUMAN	Zinc finger protein 217	-0.00884179	-0.0482667	0.01662	0.950959
BCAS1	O75363	O75363	BCAS1_HUMAN	Breast carcinoma-amplified sequence 1	-1.09449	-3.02247	1.89139	0.00629172
MACROH2A1	O75367	O75367	H2AY_HUMAN	Core histone macro-H2A.1	0.206194	1.95461	1.1016	0.0423804
SH3BGRL	O75368	O75368	SH3L1_HUMAN	Adapter SH3BGRL	0.666844	9.82371	5.72803	4.18118e-05
FLNB	O75369	O75369	FLNB_HUMAN	Filamin-B	-0.461812	-3.41904	2.18323	0.0031758
NCOR1	O75376	O75376	NCOR1_HUMAN	Nuclear receptor corepressor 1	0.464018	5.3716	3.50333	0.000191186
NDUFS6	O75380	O75380	NDUS6_HUMAN	NADH dehydrogenase [ubiquinone] iron-sulfur protein 6, mitochondrial	0.330592	2.82207	1.74241	0.00895845
PEX14	O75381	O75381	PEX14_HUMAN	Peroxisomal membrane protein PEX14	0.183793	1.22767	0.606101	0.161151
TRIM3	O75382	O75382	TRIM3_HUMAN	Tripartite motif-containing protein 3	-0.414734	-2.70212	1.65301	0.0110218
ULK1	O75385	O75385	ULK1_HUMAN	Serine/threonine-protein kinase ULK1	0.0336709	0.0727702	0.0252931	0.927494
TULP3	O75386	O75386	TULP3_HUMAN	Tubby-related protein 3	-2.09605	-5.36334	3.49823	0.000189889
CS	O75390	O75390	CISY_HUMAN	Citrate synthase, mitochondrial	0.0723132	0.544369	0.223215	0.503038
SPAG7	O75391	O75391	SPAG7_HUMAN	Sperm-associated antigen 7	0.360015	3.9578	2.56927	0.00137481
SEC22B	O75396	O75396	SC22B_HUMAN	Vesicle-trafficking protein SEC22b	0.2587	4.74085	3.10177	0.000427282
PRPF40A	O75400	O75400	PR40A_HUMAN	Pre-mRNA-processing factor 40 homolog A	0.334766	3.57674	2.29766	0.00243332
TACC1	O75410	O75410	TACC1_HUMAN	Transforming acidic coiled-coil-containing protein 1	0.410093	3.30228	2.09785	0.00388155
NME6	O75414	O75414	NDK6_HUMAN	Nucleoside diphosphate kinase 6	-1.87018	-5.36597	3.49985	0.000190594
GIGYF1	O75420	O75420	GGYF1_HUMAN	GRB10-interacting GYF protein 1	0.183779	0.672789	0.287076	0.414023
LRCH4	O75427	O75427	LRCH4_HUMAN	Leucine-rich repeat and calponin homology domain-containing protein 4	-0.15383	-1.59546	0.848652	0.0824465
MTX2	O75431	O75431	MTX2_HUMAN	Metaxin-2	-0.209129	-2.85593	1.76762	0.00844611
VPS26A	O75436	O75436	VP26A_HUMAN	Vacuolar protein sorting-associated protein 26A	0.381801	6.10783	3.94118	7.83673e-05
NDUFB1	O75438	O75438	NDUB1_HUMAN	NADH dehydrogenase [ubiquinone] 1 beta subcomplex subunit 1	0.250279	1.32588	0.668843	0.135133
PMPCB	O75439	O75439	MPPB_HUMAN	Mitochondrial-processing peptidase subunit beta	0.00546066	0.12335	0.0437001	0.877454
SAP30	O75446	O75446	SAP30_HUMAN	Histone deacetylase complex subunit SAP30	-0.43895	-1.30992	0.658536	0.139273
MED24	O75448	O75448	MED24_HUMAN	Mediator of RNA polymerase II transcription subunit 24	0.6143	3.70331	2.38869	0.00194215
KATNA1	O75449	O75449	KTNA1_HUMAN	Katanin p60 ATPase-containing subunit A1	-0.867936	-2.5033	1.50488	0.0155874
PSIP1	O75475	O75475	PSIP1_HUMAN	PC4 and SFRS1-interacting protein	0.584587	6.31968	4.06125	5.95447e-05
ERLIN1	O75477	O75477	ERLN1_HUMAN	Erlin-1	0.588742	7.32765	4.59885	1.50754e-05
GPC4	O75487	O75487	GPC4_HUMAN	Glypican-4	0.31794	1.59366	0.847414	0.0826928
NDUFS3	O75489	O75489	NDUS3_HUMAN	NADH dehydrogenase [ubiquinone] iron-sulfur protein 3, mitochondrial	0.281527	3.57005	2.29283	0.00246036
SRSF10	O75494	O75494	SRS10_HUMAN	Serine/arginine-rich splicing factor 10	0.3414	3.09887	1.94799	0.00548683
CLN5	O75503	O75503	CLN5_HUMAN	Ceroid-lipofuscinosis neuronal protein 5	-0.650031	-2.11569	1.21853	0.0315981
HSBP1	O75506	O75506	HSBP1_HUMAN	Heat shock factor-binding protein 1	-1.84427	-10.2676	5.90408	5.28634e-05
ECI2	O75521	O75521	ECI2_HUMAN	Enoyl-CoA delta isomerase 2	-1.07926	-10.044	5.81621	4.70588e-05
KHDRBS3	O75525	O75525	KHDR3_HUMAN	KH domain-containing, RNA-binding, signal transduction-associated protein 3	1.30824	6.37234	4.0907	5.38117e-05
EED	O75530	O75530	EED_HUMAN	Polycomb protein EED	0.171834	0.804071	0.356496	0.335383
BANF1	O75531	O75531	BAF_HUMAN	Barrier-to-autointegration factor	0.597499	5.47912	3.56932	0.000146341
SF3B1	O75533	O75533	SF3B1_HUMAN	Splicing factor 3B subunit 1	0.41426	4.44553	2.90527	0.000678245
CSDE1	O75534	O75534	CSDE1_HUMAN	Cold shock domain-containing protein E1	0.0713244	1.26293	0.628439	0.151321
WBP4	O75554	O75554	WBP4_HUMAN	WW domain-binding protein 4	0.478775	1.93912	1.09045	0.0436467
PRKRA	O75569	O75569	PRKRA_HUMAN	Interferon-inducible double-stranded RNA-dependent protein kinase activator A	-0.110244	-0.973752	0.452046	0.252263
RPS6KA5	O75582	O75582	KS6A5_HUMAN	Ribosomal protein S6 kinase alpha-5	-1.1879	-6.24458	4.01898	7.5407e-05
MED6	O75586	O75586	MED6_HUMAN	Mediator of RNA polymerase II transcription subunit 6	0.83375	4.78868	3.13309	0.000411523
MYCBP2	O75592	O75592	MYCB2_HUMAN	E3 ubiquitin-protein ligase MYCBP2	0.444346	5.39221	3.51603	0.000174891
SPAG6	O75602	O75602	SPAG6_HUMAN	Sperm-associated antigen 6	-3.51369	-5.56043	3.61875	0.000134831
USP2	O75604	O75604	UBP2_HUMAN	Ubiquitin carboxyl-terminal hydrolase 2	-1.70776	-7.72597	4.79703	1.72414e-05
LYPLA1	O75608	O75608	LYPA1_HUMAN	Acyl-protein thioesterase 1	-0.0285903	-0.317728	0.120774	0.690827
ERAL1	O75616	O75616	ERAL1_HUMAN	GTPase Era, mitochondrial	0.788586	3.69498	2.38272	0.00197183
REM1	O75628	O75628	REM1_HUMAN	GTP-binding protein REM 1	-1.13463	-2.761	1.6969	0.00989432
SNRNP200	O75643	O75643	U520_HUMAN	U5 small nuclear ribonucleoprotein 200 kDa helicase	0.407979	5.88457	3.81183	0.000107946
TRMU	O75648	O75648	MTU1_HUMAN	Mitochondrial tRNA-specific 2-thiouridylase 1	-0.370244	-1.03254	0.486588	0.22824
TIPRL	O75663	O75663	TIPRL_HUMAN	TIP41-like protein	0.414945	7.34719	4.60876	1.51515e-05
OFD1	O75665	O75665	OFD1_HUMAN	Centriole and centriolar satellite protein OFD1	-1.46792	-3.31685	2.10853	0.00377632
TOM1L1	O75674	O75674	TM1L1_HUMAN	TOM1-like protein 1	0.271168	2.53128	1.5257	0.0148511
RPS6KA4	O75676	O75676	KS6A4_HUMAN	Ribosomal protein S6 kinase alpha-4	0.513963	2.35072	1.39157	0.020414
SURF6	O75683	O75683	SURF6_HUMAN	Surfeit locus protein 6	2.48965	4.29499	2.80305	0.000829016
PPM1B	O75688	O75688	PPM1B_HUMAN	Protein phosphatase 1B	-0.349311	-5.77938	3.74986	0.000111989
ADAP1	O75689	O75689;Q9NPF8	ADAP1_HUMAN	Arf-GAP with dual PH domain-containing protein 1	0.0128124	0.177807	0.0642787	0.825387
UTP20	O75691	O75691	UTP20_HUMAN	Small subunit processome component 20 homolog	1.0579	8.24904	5.04608	2.09059e-05
NUP155	O75694	O75694	NU155_HUMAN	Nuclear pore complex protein Nup155	0.405366	7.26114	4.56501	2.457e-05
RP2	O75695	O75695	XRP2_HUMAN	Protein XRP2	-1.1794	-16.8699	7.94879	0
STK16	O75716	O75716	STK16_HUMAN	Serine/threonine-protein kinase 16	-0.260992	-1.08198	0.516182	0.209122
WDHD1	O75717	O75717	WDHD1_HUMAN	WD repeat and HMG-box DNA-binding protein 1	0.294678	0.801305	0.354992	0.337001
CRTAP	O75718	O75718	CRTAP_HUMAN	Cartilage-associated protein	2.48226	5.00735	3.27446	0.000328407
SLC25A12	O75746	O75746	S2512_HUMAN	Electrogenic aspartate/glutamate antiporter SLC25A12, mitochondrial	0.439857	2.89345	1.79555	0.00785747
TCEA3	O75764	O75764	TCEA3_HUMAN	Transcription elongation factor A protein 3	0.414038	1.3952	0.714073	0.119509
PALM	O75781	O75781	PALM_HUMAN	Paralemmin-1	1.26623	5.69565	3.70007	0.000118949
ATP6AP2	O75787	O75787	RENR_HUMAN	Renin receptor	-0.39485	-5.77104	3.74492	0.00011119
RNASEH2A	O75792	O75792	RNH2A_HUMAN	Ribonuclease H2 subunit A	0.365673	1.75477	0.959277	0.0613319
CDC123	O75794	O75794	CD123_HUMAN	Cell division cycle protein 123 homolog	0.435294	0.816471	0.363262	0.328877
ZMYND10	O75800	O75800	ZMY10_HUMAN	Zinc finger MYND domain-containing protein 10	-2.81921	-8.35953	5.09715	2.20588e-05
BCAR3	O75815	O75815	BCAR3_HUMAN	Breast cancer anti-estrogen resistance protein 3	-0.431399	-1.06425	0.505512	0.216054
POP7	O75817	O75817	POP7_HUMAN	Ribonuclease P protein subunit p20	0.539095	3.15278	1.98783	0.00497193
RPP40	O75818	O75818	RPP40_HUMAN	Ribonuclease P protein subunit p40	0	NaN	NaN	1
EIF3G	O75821	O75821	EIF3G_HUMAN	Eukaryotic translation initiation factor 3 subunit G	0.567561	6.35669	4.08196	5.3286e-05
EIF3J	O75822	O75822	EIF3J_HUMAN	Eukaryotic translation initiation factor 3 subunit J	0.627869	7.84444	4.85453	1.81818e-05
CBR3	O75828	O75828	CBR3_HUMAN	Carbonyl reductase [NADPH] 3	-0.853411	-1.80785	0.996736	0.0554233
PSMD10	O75832	O75832	PSD10_HUMAN	26S proteasome non-ATPase regulatory subunit 10	0.0626749	1.07726	0.513335	0.210962
AP1G2	O75843	O75843	AP1G2_HUMAN	AP-1 complex subunit gamma-like 2	0.0910378	0.239884	0.0887007	0.764569
ZMPSTE24	O75844	O75844	FACE1_HUMAN	CAAX prenyl protease 1 homolog	0.00922736	0.101185	0.0355499	0.898565
IDH1	O75874	O75874	IDHC_HUMAN	Isocitrate dehydrogenase [NADP] cytoplasmic	1.38574	6.23368	4.01281	7.51494e-05
GATB	O75879	O75879	GATB_HUMAN	Glutamyl-tRNA(Gln) amidotransferase subunit B, mitochondrial	-0.140627	-1.80656	0.99582	0.0555577
SCO1	O75880	O75880	SCO1_HUMAN	Protein SCO1 homolog, mitochondrial	0.429934	3.86194	2.50165	0.00157014
CYP7B1	O75881	O75881	CP7B1_HUMAN	Cytochrome P450 7B1	0.574228	3.37647	2.15216	0.00342269
ATRN	O75882	O75882	ATRN_HUMAN	Attractin	0.280035	0.944368	0.435051	0.265238
RBBP9	O75884	O75884	RBBP9_HUMAN	Serine hydrolase RBBP9	1.07662	6.84086	4.34595	3.79747e-05
STAM2	O75886	O75886	STAM2_HUMAN	Signal transducing adapter molecule 2	-0.215903	-2.57141	1.55559	0.013946
TUSC2	O75896	O75896	TUSC2_HUMAN	Tumor suppressor candidate 2	-1.61622	-8.52497	5.17265	2.40964e-05
CCNK	O75909	O75909	CCNK_HUMAN	Cyclin-K	0.338479	2.99113	1.86814	0.00665914
ARL6IP5	O75915	O75915	PRAF3_HUMAN	PRA1 family protein 3	0.161037	1.00322	0.469274	0.239819
PIAS1	O75925	O75925	PIAS1_HUMAN	E3 SUMO-protein ligase PIAS1	0.257429	0.694281	0.298159	0.400315
PIAS2	O75928	Q9Y6X2;O75928	PIAS2_HUMAN	E3 SUMO-protein ligase PIAS2	1.09814	5.13691	3.35681	0.000258797
BCAS2	O75934	O75934	SPF27_HUMAN	Pre-mRNA-splicing factor SPF27	0.404609	5.43732	3.54375	0.000159292
DCTN3	O75935	O75935	DCTN3_HUMAN	Dynactin subunit 3	-0.0247478	-0.400336	0.156563	0.618144
BBOX1	O75936	O75936	BODG_HUMAN	Gamma-butyrobetaine dioxygenase	-2.78868	-3.27976	2.08132	0.0040336
DNAJC8	O75937	O75937	DNJC8_HUMAN	DnaJ homolog subfamily C member 8	0.693643	9.24158	5.48691	3.25203e-05
SMNDC1	O75940	O75940	SPF30_HUMAN	Survival of motor neuron-related-splicing factor 30	0.734553	2.63953	1.60636	0.0123474
RAD17	O75943	O75943	RAD17_HUMAN	Cell cycle checkpoint protein RAD17	0.277384	1.37308	0.699557	0.124163
ATP5PD	O75947	O75947	ATP5H_HUMAN	ATP synthase subunit d, mitochondrial	-0.195945	-1.08273	0.516637	0.208847
FLOT1	O75955	O75955	FLOT1_HUMAN	Flotillin-1	-0.282841	-2.05787	1.17636	0.0350473
TRIO	O75962	O75962	TRIO_HUMAN	Triple functional domain protein	0.900276	2.67008	1.62913	0.0116819
ATP5MG	O75964	O75964	ATP5L_HUMAN	ATP synthase subunit g, mitochondrial	-0.0940554	-0.440781	0.174738	0.584492
MPDZ	O75970	O75970	MPDZ_HUMAN	Multiple PDZ domain protein	-0.327704	-2.49111	1.49581	0.0159241
CPD	O75976	O75976	CBPD_HUMAN	Carboxypeptidase D	0.493994	3.43901	2.19778	0.00305986
GLRX3	O76003	O76003	GLRX3_HUMAN	Glutaredoxin-3	-0.17145	-1.8644	1.03693	0.0499862
RSL1D1	O76021	O76021	RL1D1_HUMAN	Ribosomal L1 domain-containing protein 1	1.7892	13.6675	7.06964	0
WFS1	O76024	O76024	WFS1_HUMAN	Wolframin	-0.530094	-3.8216	2.47305	0.00163976
ANXA9	O76027	O76027	ANXA9_HUMAN	Annexin A9	1.18239	3.6168	2.32655	0.0022439
CLPX	O76031	O76031	CLPX_HUMAN	ATP-dependent Clp protease ATP-binding subunit clpX-like, mitochondrial	0.0929568	1.05442	0.499629	0.219821
SEC14L2	O76054	O76054	S14L2_HUMAN	SEC14-like protein 2	1.16746	6.28779	4.04333	6.6087e-05
TM7SF2	O76062	O76062	ERG24_HUMAN	Delta(14)-sterol reductase TM7SF2	-0.130461	-2.27764	1.33752	0.0233086
SNCG	O76070	O76070	SYUG_HUMAN	Gamma-synuclein	1.17073	2.07829	1.19123	0.0337089
CIAO1	O76071	O76071	CIAO1_HUMAN	Probable cytosolic iron-sulfur protein assembly protein CIAO1	0.583363	5.43747	3.54384	0.000159393
PDE5A	O76074	O76074	PDE5A_HUMAN	cGMP-specific 3',5'-cyclic phosphodiesterase	-0.798177	-1.711	0.928608	0.0666392
SRP72	O76094	O76094	SRP72_HUMAN	Signal recognition particle subunit SRP72	0.115746	1.52549	0.801013	0.0940681
DXO	O77932	O77932	DXO_HUMAN	Decapping and exoribonuclease protein	0.221102	0.955432	0.441429	0.260192
DDAH1	O94760	O94760	DDAH1_HUMAN	N(G),N(G)-dimethylarginine dimethylaminohydrolase 1	-0.167692	-1.34967	0.684281	0.129719
RECQL5	O94762	O94762	RECQ5_HUMAN	ATP-dependent DNA helicase Q5	0.335963	1.40434	0.72009	0.117756
URI1	O94763	O94763	RMP_HUMAN	Unconventional prefoldin RPB5 interactor 1	0.49356	4.37913	2.86035	0.000760626
B3GAT3	O94766	Q9NPZ5;O94766	B3GA3_HUMAN	Galactosylgalactosylxylosylprotein 3-beta-glucuronosyltransferase 3	-0.486699	-1.44867	0.749455	0.108669
MTA2	O94776	O94776	MTA2_HUMAN	Metastasis-associated protein MTA2	0.835532	9.22681	5.48063	3.24324e-05
ALDH1A2	O94788	O94788	AL1A2_HUMAN	Retinal dehydrogenase 2	0.669118	4.0114	2.60687	0.00127007
TPPP	O94811	O94811	TPPP_HUMAN	Tubulin polymerization-promoting protein	-2.78761	-11.0045	6.1826	7.59494e-05
KBTBD11	O94819	O94819	KBTBB_HUMAN	Kelch repeat and BTB domain-containing protein 11	0.39869	3.51895	2.25585	0.00268552
LTN1	O94822	O94822	LTN1_HUMAN	E3 ubiquitin-protein ligase listerin	0.236385	2.92886	1.82189	0.00739702
TOMM70	O94826	O94826	TOM70_HUMAN	Mitochondrial import receptor subunit TOM70	0.107264	1.43274	0.73887	0.111817
IPO13	O94829	O94829	IPO13_HUMAN	Importin-13	0.166993	0.881582	0.399357	0.29536
DDHD2	O94830	O94830	DDHD2_HUMAN	Phospholipase DDHD2	0.382019	3.5881	2.30586	0.00238764
MYO1D	O94832	O94832;B0I1T2	MYO1D_HUMAN	Unconventional myosin-Id	-0.117621	-0.884423	0.400953	0.293938
TOX4	O94842	O94842	TOX4_HUMAN	TOX high mobility group box family member 4	0.370911	0.746865	0.325746	0.36812
SEC24D	O94855	O94855	SC24D_HUMAN	Protein transport protein Sec24D	0.173789	1.33141	0.672424	0.13395
NFASC	O94856	O94856	NFASC_HUMAN	Neurofascin	-2.14436	-3.88328	2.51675	0.00152852
SUPT7L	O94864	O94864	ST65G_HUMAN	STAGA complex 65 subunit gamma	0.139955	0.292927	0.110381	0.713259
UFL1	O94874	Q92845;O94874	UFL1_HUMAN	E3 UFM1-protein ligase 1	0.158559	3.72964	2.40753	0.00187318
SORBS2	O94875	O94875	SRBS2_HUMAN	Sorbin and SH3 domain-containing protein 2	0.18939	0.586825	0.243873	0.471776
PHF14	O94880	O94880	PHF14_HUMAN	PHD finger protein 14	0.879558	9.7287	5.68949	4.0678e-05
TMEM63A	O94886	O94886	CSCL1_HUMAN	CSC1-like protein 1	-0.76737	-4.23404	2.76128	0.000928027
FARP2	O94887	O94887	FARP2_HUMAN	FERM, ARHGEF and pleckstrin domain-containing protein 2	-0.834247	-6.10159	3.9376	7.81123e-05
UBXN7	O94888	O94888	UBXN7_HUMAN	UBX domain-containing protein 7	0.324064	3.61917	2.32826	0.00223575
SUN1	O94901	O94901	SUN1_HUMAN	SUN domain-containing protein 1	-0.16832	-2.10081	1.20766	0.032464
PLPBP	O94903	O94903	PLPHP_HUMAN	Pyridoxal phosphate homeostasis protein	0.784854	7.34826	4.6093	1.51707e-05
ERLIN2	O94905	O94905	ERLN2_HUMAN	Erlin-2	-0.0469623	-0.34379	0.131871	0.667305
PRPF6	O94906	O94906	PRP6_HUMAN	Pre-mRNA-processing factor 6	0.40979	6.0922	3.93222	7.78589e-05
PCF11	O94913	O94913	PCF11_HUMAN	Pre-mRNA cleavage complex 2 protein Pcf11	0.691296	3.43117	2.19207	0.00310017
FRYL	O94915	O94915	FRYL_HUMAN	Protein furry homolog-like	0.461458	1.58747	0.843176	0.0837072
ENDOD1	O94919	O94919	ENDD1_HUMAN	Endonuclease domain-containing 1 protein	0.329617	2.37342	1.40839	0.0196245
GLCE	O94923	O94923	GLCE_HUMAN	D-glucuronyl C5-epimerase	0.936236	2.10414	1.21009	0.0322855
GLS	O94925	O94925	GLSK_HUMAN	Glutaminase kidney isoform, mitochondrial	0.696538	3.63627	2.34057	0.00216886
HAUS5	O94927	O94927	HAUS5_HUMAN	HAUS augmin-like complex subunit 5	-0.470237	-1.21305	0.596903	0.16519
FBXO21	O94952	O94952	FBX21_HUMAN	F-box only protein 21	0.934796	4.92287	3.2202	0.00036228
SOGA1	O94964	O94964	SOGA1_HUMAN	Protein SOGA1	0.869374	3.40446	2.1726	0.00326457
USP19	O94966	O94966	UBP19_HUMAN	Ubiquitin carboxyl-terminal hydrolase 19	-0.0190828	-0.437834	0.173399	0.586415
WDR47	O94967	O94967	WDR47_HUMAN	WD repeat-containing protein 47	-1.4484	-5.1705	3.37799	0.000256203
AP2A2	O94973	O94973	AP2A2_HUMAN	AP-2 complex subunit alpha-2	0.175306	1.39853	0.716261	0.118808
SEC31A	O94979	O94979	SC31A_HUMAN	Protein transport protein Sec31A	0.200159	2.49485	1.49859	0.0158188
FAM13A	O94988	O94988	FA13A_HUMAN	Protein FAM13A	-1.33454	-4.1084	2.6745	0.00110037
HEXIM1	O94992	O94992	HEXI1_HUMAN	Protein HEXIM1	0.544943	1.43693	0.741655	0.110953
TJP3	O95049	O95049	ZO3_HUMAN	Tight junction protein ZO-3	-0.884048	-4.87036	3.18625	0.00037454
UBR5	O95071	O95071	UBR5_HUMAN	E3 ubiquitin-protein ligase UBR5	-0.358196	-0.578609	0.23984	0.477871
AGFG2	O95081	O95081	AGFG2_HUMAN	Arf-GAP domain and FG repeat-containing protein 2	-0.0773683	-0.308684	0.116965	0.698988
SCAF4	O95104	O95104	SCAF4_HUMAN	SR-related and CTD-associated factor 4	0.28297	3.0813	1.93498	0.00569582
MFN2	O95140	O95140	MFN2_HUMAN	Mitofusin-2	0.318261	3.70335	2.38872	0.00194286
AKR7A3	O95154	O95154	ARK73_HUMAN	Aflatoxin B1 aldehyde reductase member 3	-1.06149	-3.66313	2.35988	0.00207238
UBE4B	O95155	O95155	UBE4B_HUMAN	Ubiquitin conjugation factor E4 B	0.735055	1.67402	0.902851	0.0714633
ZFPL1	O95159	O95159	ZFPL1_HUMAN	Zinc finger protein-like 1	-0.261672	-1.98367	1.12257	0.0402409
ELP1	O95163	O95163	ELP1_HUMAN	Elongator complex protein 1	0.267479	5.876	3.8068	0.000107623
NDUFA3	O95167	O95167	NDUA3_HUMAN	NADH dehydrogenase [ubiquinone] 1 alpha subcomplex subunit 3	0.651332	2.19043	1.27329	0.0273852
NDUFB4	O95168	O95168	NDUB4_HUMAN	NADH dehydrogenase [ubiquinone] 1 beta subcomplex subunit 4	0.00753284	0.0578589	0.0199962	0.941291
NDUFB8	O95169	O95169	NDUB8_HUMAN	NADH dehydrogenase [ubiquinone] 1 beta subcomplex subunit 8, mitochondrial	0.341106	2.20908	1.28701	0.0264499
NDUFB2	O95178	O95178	NDUB2_HUMAN	NADH dehydrogenase [ubiquinone] 1 beta subcomplex subunit 2, mitochondrial	0.385486	3.51239	2.25109	0.00270661
NDUFA7	O95182	O95182	NDUA7_HUMAN	NADH dehydrogenase [ubiquinone] 1 alpha subcomplex subunit 7	0.825536	1.57451	0.834322	0.0858324
LETM1	O95202	O95202	LETM1_HUMAN	Mitochondrial proton/calcium exchanger protein	0.565747	4.06609	2.64506	0.00117183
EPN2	O95208	O95208	EPN2_HUMAN	Epsin-2	-0.174998	-0.964562	0.446712	0.255955
STBD1	O95210	O95210	STBD1_HUMAN	Starch-binding domain-containing protein 1	-2.59018	-4.99205	3.26467	0.000337507
ZRANB2	O95218	O95218	ZRAB2_HUMAN	Zinc finger Ran-binding domain-containing protein 2	0.32113	3.08701	1.93921	0.00565302
SNX4	O95219	O95219	SNX4_HUMAN	Sorting nexin-4	-0.378965	-10.3226	5.92543	5.50459e-05
LUC7L3	O95232	O95232	LC7L3_HUMAN	Luc7-like protein 3	0.588632	4.9471	3.23581	0.000364611
KIF4A	O95239	O95239;Q2VIQ3	KIF4A_HUMAN	Chromosome-associated kinesin KIF4A	0	NaN	NaN	1
MBD4	O95243	O95243	MBD4_HUMAN	Methyl-CpG-binding domain protein 4	-0.0875288	-0.305265	0.115531	0.701943
SBF1	O95248	O95248	MTMR5_HUMAN	Myotubularin-related protein 5	0.1937	4.01625	2.61026	0.00126466
GOSR1	O95249	O95249	GOSR1_HUMAN	Golgi SNAP receptor complex member 1	-0.0669162	-0.599663	0.250209	0.462856
KAT7	O95251	O95251	KAT7_HUMAN	Histone acetyltransferase KAT7	0.16982	0.561931	0.231705	0.490503
ATE1	O95260	O95260	ATE1_HUMAN	Arginyl-tRNA--protein transferase 1	0.409314	2.18148	1.26673	0.027847
VAPB	O95292	O95292	VAPB_HUMAN	Vesicle-associated membrane protein-associated protein B/C	0.0696778	0.916862	0.419309	0.278117
RASAL1	O95294	O95294	RASL1_HUMAN	RasGAP-activating-like protein 1	1.84518	5.39988	3.52076	0.000170319
SNAPIN	O95295	O95295	SNAPN_HUMAN	SNARE-associated protein Snapin	0.377578	4.07097	2.64846	0.00116841
NDUFC2	O95298	O95298	NDUC2_HUMAN	NADH dehydrogenase [ubiquinone] 1 subunit C2	0.502498	3.38263	2.15666	0.00339894
NDUFA10	O95299	O95299	NDUAA_HUMAN	NADH dehydrogenase [ubiquinone] 1 alpha subcomplex subunit 10, mitochondrial	0.391052	5.76344	3.74041	0.000110795
FKBP9	O95302	O95302	FKBP9_HUMAN	Peptidyl-prolyl cis-trans isomerase FKBP9	0.656564	4.59053	3.00242	0.000556938
CELF2	O95319	O95319	CELF2_HUMAN	CUGBP Elav-like family member 2	1.69452	8.81099	5.3005	2.75229e-05
PGLS	O95336	O95336	6PGL_HUMAN	6-phosphogluconolactonase	0.453889	3.16139	1.99418	0.00490767
PAPSS2	O95340	O95340	PAPS2_HUMAN	Bifunctional 3'-phosphoadenosine 5'-phosphosulfate synthase 2	-0.812995	-1.40416	0.71997	0.11774
SMC2	O95347	O95347	SMC2_HUMAN	Structural maintenance of chromosomes protein 2	0.676118	0.907685	0.414092	0.282355
ATG7	O95352	O95352	ATG7_HUMAN	Ubiquitin-like modifier-activating enzyme ATG7	-0.199922	-4.39265	2.86952	0.000733483
TACC2	O95359	O95359	TACC2_HUMAN	Transforming acidic coiled-coil-containing protein 2	-0.918306	-4.23999	2.76537	0.000919423
FARS2	O95363	O95363	SYFM_HUMAN	Phenylalanine--tRNA ligase, mitochondrial	-0.898089	-10.3117	5.9212	5.42986e-05
LYPLA2	O95372	O95372	LYPA2_HUMAN	Acyl-protein thioesterase 2	1.75867	15.2379	7.52209	0
IPO7	O95373	O95373	IPO7_HUMAN	Importin-7	0.44898	6.14701	3.96358	7.6412e-05
ARIH2	O95376	O95376	ARI2_HUMAN	E3 ubiquitin-protein ligase ARIH2	1.12488	3.36983	2.14731	0.00346472
SLU7	O95391	O95391	SLU7_HUMAN	Pre-mRNA-splicing factor SLU7	0.281878	0.454968	0.181214	0.573077
PGM3	O95394	O95394	AGM1_HUMAN	Phosphoacetylglucosamine mutase	0.3472	3.49415	2.23787	0.00281812
MOCS3	O95396	O95396	MOCS3_HUMAN	Adenylyltransferase and sulfurtransferase MOCS3	-0.0660522	-0.727211	0.315358	0.380001
CD2BP2	O95400	O95400	CD2B2_HUMAN	CD2 antigen cytoplasmic tail-binding protein 2	0.606483	5.25161	3.42885	0.000240476
MED26	O95402	O95402	MED26_HUMAN	Mediator of RNA polymerase II transcription subunit 26	0.907847	2.91543	1.81189	0.00756656
SVIL	O95425	O95425	SVIL_HUMAN	Supervillin	-0.349687	-3.63254	2.33788	0.00218712
PAPLN	O95428	O95428	PPN_HUMAN	Papilin	0.100081	0.186643	0.0676925	0.816857
BAG4	O95429	O95429	BAG4_HUMAN	BAG family molecular chaperone regulator 4	0.999658	4.46919	2.92121	0.000655919
AHSA1	O95433	O95433	AHSA1_HUMAN	Activator of 90 kDa heat shock protein ATPase homolog 1	-0.618385	-5.78281	3.75189	0.000112554
SLC34A2	O95436	O95436	NPT2B_HUMAN	Sodium-dependent phosphate transport protein 2B	0.941966	3.84959	2.4929	0.0015997
PARN	O95453	O95453	PARN_HUMAN	Poly(A)-specific ribonuclease PARN	0.654977	7.72558	4.79684	1.72166e-05
PSMG1	O95456	O95456	PSMG1_HUMAN	Proteasome assembly chaperone 1	0.381503	2.89738	1.79847	0.00781317
FMNL1	O95466	O95466	FMNL1_HUMAN	Formin-like protein 1	0.927661	2.10428	1.21019	0.0322828
SGPL1	O95470	O95470	SGPL1_HUMAN	Sphingosine-1-phosphate lyase 1	0.452065	12.1204	6.5752	0.000126316
NSA2	O95478	O95478	NSA2_HUMAN	Ribosome biogenesis protein NSA2 homolog	2.2517	7.73194	4.79994	1.7316e-05
H6PD	O95479	O95479	G6PE_HUMAN	GDH/6PGL endoplasmic bifunctional protein	1.11965	12.3061	6.63742	0.000141176
SEC24A	O95486	O95486	SC24A_HUMAN	Protein transport protein Sec24A	0.0767556	1.11543	0.536476	0.197105
SEC24B	O95487	O95487	SC24B_HUMAN	Protein transport protein Sec24B	-0.105459	-1.33091	0.672099	0.134005
ADGRL2	O95490	O95490	AGRL2_HUMAN	Adhesion G protein-coupled receptor L2	0.174106	0.349562	0.134353	0.662234
SLC2A10	O95528	O95528	GTR10_HUMAN	Solute carrier family 2, facilitated glucose transporter member 10	-0.317989	-0.853041	0.383418	0.309781
TDP2	O95551	O95551	TYDP2_HUMAN	Tyrosyl-DNA phosphodiesterase 2	0.386578	2.00095	1.13506	0.0390193
MPC2	O95563	O95563	MPC2_HUMAN	Mitochondrial pyruvate carrier 2	-0.81965	-4.2022	2.73937	0.000972339
ETHE1	O95571	O95571	ETHE1_HUMAN	Persulfide dioxygenase ETHE1, mitochondrial	-0.273764	-1.27254	0.634562	0.148776
ACSL3	O95573	O95573	ACSL3_HUMAN	Fatty acid CoA ligase Acsl3	-0.206059	-3.95573	2.56782	0.00137942
POLR1A	O95602	O95602	RPA1_HUMAN	DNA-directed RNA polymerase I subunit RPA1	1.12048	2.2609	1.32517	0.0241116
PCNT	O95613	O95613	PCNT_HUMAN	Pericentrin	0.0811772	0.709727	0.306194	0.390251
YEATS4	O95619	O95619	YETS4_HUMAN	YEATS domain-containing protein 4	1.64988	2.19529	1.27687	0.0271274
CNOT4	O95628	O95628	CNOT4_HUMAN	CCR4-NOT transcription complex subunit 4	0.438417	1.26275	0.628323	0.151355
STAMBP	O95630	O95630	STABP_HUMAN	STAM-binding protein	0.427427	7.55106	4.71095	1.62382e-05
CPSF4	O95639	O95639	CPSF4_HUMAN	Cleavage and polyadenylation specificity factor subunit 4	0.0959854	0.225463	0.082936	0.77876
NFATC1	O95644	O95644	NFAC1_HUMAN	Nuclear factor of activated T-cells, cytoplasmic 1	-0.434819	-1.3278	0.670082	0.13475
ASMTL	O95671	O95671	ASML_HUMAN	Probable bifunctional dTTP/UTP pyrophosphatase/methyltransferase protein	1.03815	4.33827	2.83257	0.000798946
EYA4	O95677	O95677	EYA4_HUMAN	Eyes absent homolog 4	0.269057	1.00171	0.468384	0.240358
CEP43	O95684	O95684	CEP43_HUMAN	Centrosomal protein 43	-0.879037	-5.36694	3.50045	0.000190712
BRD1	O95696	O95696	BRD1_HUMAN	Bromodomain-containing protein 1	0.628972	3.94705	2.56172	0.00137926
POP4	O95707	O95707	RPP29_HUMAN	Ribonuclease P protein subunit p29	0.763283	2.95483	1.84118	0.00709005
RAB3D	O95716	P20337;O95716;Q96E17	RAB3D_HUMAN	Ras-related protein Rab-3D	0.867161	1.56269	0.82626	0.0877334
ESRRA;ESRRB	O95718;P11474	O95718;P11474	ERR1_HUMAN;ERR2_HUMAN	Steroid hormone receptor ERR2	-0.0841475	-0.360694	0.139164	0.652434
SNAP29	O95721	O95721	SNP29_HUMAN	Synaptosomal-associated protein 29	0.0737274	0.854269	0.3841	0.309248
OXSR1	O95747	O95747	OXSR1_HUMAN	Serine/threonine-protein kinase OSR1	1.03549	13.736	7.09034	0
GGPS1	O95749	O95749	GGPPS_HUMAN	Geranylgeranyl pyrophosphate synthase	0.260656	1.58406	0.840849	0.0842728
RAB36	O95755	O95755	RAB36_HUMAN	Ras-related protein Rab-36	-1.96899	-5.45586	3.55511	0.00016051
HSPA4L	O95757	O95757	HS74L_HUMAN	Heat shock 70 kDa protein 4L	-1.76885	-9.39532	5.55177	3.49854e-05
PTBP3	O95758	O95758	PTBP3_HUMAN	Polypyrimidine tract-binding protein 3	-0.591471	-5.74513	3.72954	0.000118644
TBC1D8	O95759	O95759	TBCD8_HUMAN	TBC1 domain family member 8	-1.85426	-4.47433	2.92467	0.00065713
LSM8	O95777	O95777	LSM8_HUMAN	U6 snRNA-associated Sm-like protein LSm8	0.892301	6.59969	4.21606	5.06823e-05
AP2A1	O95782	O95782	AP2A1_HUMAN	AP-2 complex subunit alpha-1	-0.0618899	-0.841175	0.376845	0.315823
WIZ	O95785	O95785	WIZ_HUMAN	Protein Wiz	1.61937	3.2629	2.06894	0.00411579
RIGI	O95786	O95786	RIGI_HUMAN	Antiviral innate immune response receptor RIG-I	0.32484	4.02586	2.61698	0.0012376
STAU1	O95793	O95793	STAU1_HUMAN	Double-stranded RNA-binding protein Staufen homolog 1	-0.473907	-5.40127	3.52161	0.000170533
TTC4	O95801	O95801	TTC4_HUMAN	Tetratricopeptide repeat protein 4	-0.0385799	-0.550885	0.226356	0.498301
CAVIN2	O95810	O95810	CAVN2_HUMAN	Caveolae-associated protein 2	-0.045877	-0.138116	0.0492019	0.863084
BAG2	O95816	O95816	BAG2_HUMAN	BAG family molecular chaperone regulator 2	-0.856662	-4.3492	2.84002	0.000803887
BAG3	O95817	O95817	BAG3_HUMAN	BAG family molecular chaperone regulator 3	-0.506809	-5.72725	3.7189	0.000120702
MAP4K4	O95819	O95819	M4K4_HUMAN	Mitogen-activated protein kinase kinase kinase kinase 4	-0.21371	-0.416464	0.163759	0.604181
MLYCD	O95822	O95822	DCMC_HUMAN	Malonyl-CoA decarboxylase, mitochondrial	-0.280043	-2.11826	1.22041	0.0314434
CRYZL1	O95825	O95825	QORL1_HUMAN	Quinone oxidoreductase-like protein 1	0.264987	2.81814	1.73948	0.00901392
AIFM1	O95831	O95831	AIFM1_HUMAN	Apoptosis-inducing factor 1, mitochondrial	0.468011	2.91555	1.81198	0.0075641
CLDN1	O95832	O95832	CLD1_HUMAN	Claudin-1	1.48411	4.26769	2.78437	0.000866438
CLIC3	O95833	O95833	CLIC3_HUMAN	Chloride intracellular channel protein 3	1.23527	4.73007	3.0947	0.000425574
EML2	O95834	O95834	EMAL2_HUMAN	Echinoderm microtubule-associated protein-like 2	-0.315928	-2.02319	1.15118	0.0374789
NUDT14	O95848	O95848	NUD14_HUMAN	Uridine diphosphate glucose pyrophosphatase NUDT14	-0.257008	-0.830965	0.371214	0.321164
TSPAN15	O95858	O95858	TSN15_HUMAN	Tetraspanin-15	-0.0757814	-0.489127	0.19702	0.545193
BPNT1	O95861	O95861	BPNT1_HUMAN	3'(2'),5'-bisphosphate nucleotidase 1	0.556052	5.76155	3.73929	0.000110717
DDAH2	O95865	O95865	DDAH2_HUMAN	N(G),N(G)-dimethylarginine dimethylaminohydrolase 2	0.92017	5.90613	3.82444	0.000108844
ABHD16A	O95870	O95870	ABHGA_HUMAN	Phosphatidylserine lipase ABHD16A	0.164387	2.05791	1.17639	0.0350462
TXNDC12	O95881	O95881	TXD12_HUMAN	Thioredoxin domain-containing protein 12	0.319854	4.23309	2.76063	0.000927242
SYF2	O95926	O95926	SYF2_HUMAN	Pre-mRNA-splicing factor SYF2	0.672343	3.59673	2.31209	0.00234789
EFEMP2	O95967	O95967	FBLN4_HUMAN	EGF-containing fibulin-like extracellular matrix protein 2	0.214705	0.704045	0.303232	0.393907
MBD3	O95983	O95983	MBD3_HUMAN	Methyl-CpG-binding domain protein 3	0.861803	4.12786	2.688	0.00106962
TOP3B	O95985	O95985	TOP3B_HUMAN	DNA topoisomerase 3-beta-1	0.269161	1.39236	0.712202	0.120021
NUDT3	O95989	O95989	NUDT3_HUMAN	Diphosphoinositol polyphosphate phosphohydrolase 1	0.904222	3.92428	2.54569	0.00143286
FAM107A	O95990	O95990	F107A_HUMAN	Actin-associated protein FAM107A	1.30564	7.36702	4.61879	1.52284e-05
AGR2	O95994	O95994	AGR2_HUMAN	Anterior gradient protein 2 homolog	-2.8527	-6.00714	3.8832	8.13772e-05
GAS8	O95995	O95995	DRC4_HUMAN	Dynein regulatory complex subunit 4	-2.66876	-4.98337	3.2591	0.000342919
BCL10	O95999	O95999	BCL10_HUMAN	B-cell lymphoma/leukemia 10	0.587278	4.37611	2.8583	0.000759607
NDUFB10	O96000	O96000	NDUBA_HUMAN	NADH dehydrogenase [ubiquinone] 1 beta subcomplex subunit 10	0.240384	2.4213	1.44392	0.0180699
CLPTM1	O96005	O96005	CLPT1_HUMAN	Putative lipid scramblase CLPTM1	0.184042	2.27703	1.33707	0.0233225
TOMM40	O96008	O96008	TOM40_HUMAN	Mitochondrial import receptor subunit TOM40 homolog	-0.00331362	-0.0323063	0.0110562	0.967375
PEX11B	O96011	O96011	PX11B_HUMAN	Peroxisomal membrane protein 11B	-0.321991	-1.01788	0.477911	0.233851
PAK4	O96013	O96013	PAK4_HUMAN	Serine/threonine-protein kinase PAK 4	0.171006	2.68968	1.64374	0.0112725
DNAL4	O96015	O96015	DNAL4_HUMAN	Dynein axonemal light chain 4	-2.7128	-3.96096	2.5715	0.00136084
CHEK2	O96017	O96017	CHK2_HUMAN	Serine/threonine-protein kinase Chk2	0.709113	1.50427	0.786692	0.097835
ACTL6A	O96019	O96019	ACL6A_HUMAN	Actin-like protein 6A	0.666402	6.64851	4.2426	4.7384e-05
NSD2	O96028	O96028	NSD2_HUMAN	Histone-lysine N-methyltransferase NSD2	0	NaN	NaN	1
MT-CYB	P00156	P00156	CYB_HUMAN	Cytochrome b	-0.00026679	-0.00171713	0.000580737	0.998118
CYB5A	P00167	P00167	CYB5_HUMAN	Cytochrome b5	-0.054627	-0.500333	0.20227	0.536168
ADH1B	P00325	P00325;P00326	ADH1B_HUMAN	All-trans-retinol dehydrogenase [NAD(+)] ADH1B	0.0468328	0.172083	0.0620787	0.830958
ADH1C	P00326	P00326	ADH1G_HUMAN	Alcohol dehydrogenase 1C	1.35475	3.15743	1.99126	0.00494405
LDHA	P00338	P00338	LDHA_HUMAN	L-lactate dehydrogenase A chain	1.65129	11.3003	6.28995	8.95522e-05
ALDH1A1	P00352	P00352	AL1A1_HUMAN	Aldehyde dehydrogenase 1A1	-0.323812	-0.763071	0.334379	0.35819
GLUD1	P00367	P00367;P49448;Cont_P00366	DHE3_HUMAN	Glutamate dehydrogenase 1, mitochondrial	0.141332	1.1108	0.533651	0.198732
CYB5R3	P00387	P00387	NB5R3_HUMAN	NADH-cytochrome b5 reductase 3	0.0802004	0.634143	0.267428	0.439489
GSR	P00390	P00390	GSHR_HUMAN	Glutathione reductase, mitochondrial	0.164453	1.2437	0.616231	0.156798
MT-CO1	P00395	P00395	COX1_HUMAN	Cytochrome c oxidase subunit 1	-0.557625	-1.52384	0.799892	0.09427
MT-CO2	P00403	P00403	COX2_HUMAN	Cytochrome c oxidase subunit 2	-0.432009	-2.16809	1.2569	0.0285591
SOD1	P00441	P00441	SODC_HUMAN	Superoxide dismutase [Cu-Zn]	0.28961	3.23656	2.04957	0.00431172
CP	P00450	P00450	CERU_HUMAN	Ceruloplasmin	0.39211	1.11316	0.535093	0.197882
PNP	P00491	P00491	PNPH_HUMAN	Purine nucleoside phosphorylase	-0.166724	-0.556594	0.229117	0.494436
HPRT1	P00492	P00492	HPRT_HUMAN	Hypoxanthine-guanine phosphoribosyltransferase	0.268811	1.61174	0.859819	0.0799657
GOT2	P00505	P00505	AATM_HUMAN	Aspartate aminotransferase, mitochondrial	-0.509561	-2.9945	1.87065	0.00662344
ABL1	P00519	P00519	ABL1_HUMAN	Tyrosine-protein kinase ABL1	0.486332	3.98843	2.59078	0.00133124
EGFR	P00533	P00533	EGFR_HUMAN	Epidermal growth factor receptor	0.549522	2.93092	1.82341	0.00736996
PGK1	P00558	P00558	PGK1_HUMAN	Phosphoglycerate kinase 1	0.541322	6.73821	4.29105	4.45795e-05
AK1	P00568	P00568	KAD1_HUMAN	Adenylate kinase isoenzyme 1	-3.40268	-14.852	7.41503	0
F2	P00734	P00734	THRB_HUMAN	Prothrombin	0.0231912	0.101262	0.0355781	0.898613
HP	P00738	P00738	HPT_HUMAN	Haptoglobin	0.507841	0.720726	0.31195	0.383872
F9	P00740	P00740	FA9_HUMAN	Coagulation factor IX	-0.63319	-1.74471	0.952215	0.0625887
CFD	P00746	P00746	CFAD_HUMAN	Complement factor D	0.678237	1.81965	1.00509	0.0543016
PLG	P00747	P00747;Cont_P06868	PLMN_HUMAN	Plasminogen	0.0236731	0.0701409	0.0243548	0.929754
F12	P00748	P00748	FA12_HUMAN	Coagulation factor XII	-0.379336	-0.589361	0.245121	0.470147
CFB	P00751	P00751	CFAB_HUMAN	Complement factor B	0.263952	0.855126	0.384576	0.30884
MT-ATP6	P00846	P00846	ATP6_HUMAN	ATP synthase subunit a	-0.134288	-0.578512	0.239793	0.477867
CA1	P00915	P00915	CAH1_HUMAN	Carbonic anhydrase 1	0.0182073	0.020702	0.00705317	0.979076
CA2	P00918	P00918	CAH2_HUMAN	Carbonic anhydrase 2	0.721052	1.13581	0.548942	0.190086
ASS1	P00966	P00966	ASSY_HUMAN	Argininosuccinate synthase	2.42	4.83089	3.16061	0.000401874
SERPINC1	P01008	P01008	ANT3_HUMAN	Antithrombin-III	0.2884	0.806386	0.357757	0.334316
SERPINA1	P01009	P01009	A1AT_HUMAN	Alpha-1-antitrypsin	0.483664	0.979467	0.455374	0.249719
SERPINA3	P01011	P01011	AACT_HUMAN	Alpha-1-antichymotrypsin	0.131221	0.304936	0.115393	0.702205
AGT	P01019	P01019	ANGT_HUMAN	Angiotensinogen	0.254219	0.59343	0.247127	0.467093
A2M	P01023	P20742;P01023	A2MG_HUMAN	Alpha-2-macroglobulin	0.283253	0.711982	0.307372	0.388879
C3	P01024	P01024	CO3_HUMAN	Complement C3	0.233059	0.714945	0.308921	0.387252
TIMP1	P01033	P01033	TIMP1_HUMAN	Metalloproteinase inhibitor 1	0.129566	0.286811	0.107843	0.719039
CST3	P01034	P01034	CYTC_HUMAN	Cystatin-C	0.198518	0.879628	0.39826	0.296275
CSTA	P01040	P01040	CYTA_HUMAN	Cystatin-A	-0.194634	-0.430585	0.170116	0.592084
KNG1	P01042	P01042	KNG1_HUMAN	Kininogen-1	0.336635	0.927103	0.42515	0.27331
NRAS	P01111	P01111;P01112	RASN_HUMAN	GTPase NRas	0.0904785	1.47569	0.767498	0.103286
HRAS	P01112	P01112	RASH_HUMAN	GTPase HRas	-1.3723	-2.81293	1.7356	0.00908905
KRAS	P01116	P01116;P01112	RASK_HUMAN	GTPase KRas	0.126355	1.25322	0.622267	0.154011
JCHAIN	P01591	P01591	IGJ_HUMAN	Immunoglobulin J chain	0.577491	0.603265	0.251994	0.460603
IGKV3-20	P01619	P01619	KV320_HUMAN	Immunoglobulin kappa variable 3-20	0.515434	0.945345	0.435613	0.264786
IGKV3-15	P01624	A0A075B6H7;A0A0C4DH90;A0A0C4DH55;P01624	KV315_HUMAN	Immunoglobulin kappa variable 3-15	-0.56937	-0.493849	0.199228	0.54131
IGLV1-47	P01700	P01700	LV147_HUMAN	Immunoglobulin lambda variable 1-47	0.920618	1.58205	0.83947	0.0845527
IGHV3-7	P01780	P01780	HV307_HUMAN	Immunoglobulin heavy variable 3-7	0.281853	0.613825	0.257245	0.452785
PIGR	P01833	P01833	PIGR_HUMAN	Polymeric immunoglobulin receptor	0.247994	0.199279	0.07261	0.80447
IGKC	P01834	P01834	IGKC_HUMAN	Immunoglobulin kappa constant	0.386128	0.736165	0.320079	0.374428
IGHG1	P01857	P01859;P01857	IGHG1_HUMAN	Immunoglobulin heavy constant gamma 1	0.471335	0.838221	0.375213	0.317493
IGHG2	P01859	P01859	IGHG2_HUMAN	Immunoglobulin heavy constant gamma 2	0.30106	0.791218	0.349521	0.342614
IGHG3	P01860	P01860	IGHG3_HUMAN	Immunoglobulin heavy constant gamma 3	0.200868	0.510891	0.207247	0.528466
IGHG4	P01861	P01861	IGHG4_HUMAN	Immunoglobulin heavy constant gamma 4	0.43212	0.831478	0.371496	0.320969
IGHM	P01871	P01871	IGHM_HUMAN	Immunoglobulin heavy constant mu	0.698745	1.40273	0.719027	0.117919
IGHA1	P01876	P01877;P01876	IGHA1_HUMAN	Immunoglobulin heavy constant alpha 1	0.394879	0.564594	0.232999	0.488644
IGHA2	P01877	P01877	IGHA2_HUMAN	Immunoglobulin heavy constant alpha 2	0.413718	0.470696	0.188454	0.560508
HLA-B	P01889	P01889;P04439	HLAB_HUMAN	HLA class I histocompatibility antigen, B alpha chain	-0.0467254	-0.185125	0.0671043	0.818204
HLA-DRA	P01903	P01903;P01906	DRA_HUMAN	HLA class II histocompatibility antigen, DR alpha chain	0.504278	1.42477	0.733591	0.113452
HLA-DRB1	P01911	P01911	DRB1_HUMAN	HLA class II histocompatibility antigen, DRB1 beta chain	0.334208	0.934417	0.429337	0.269716
HBD	P02042	P02042	HBD_HUMAN	Hemoglobin subunit delta	-0.399849	-0.376066	0.145862	0.638973
MB	P02144	P02144	MYG_HUMAN	Myoglobin	-3.67646	-6.8763	4.36478	3.40064e-05
COL1A1	P02452	P02452	CO1A1_HUMAN	Collagen alpha-1(I) chain	0.367738	0.467333	0.1869	0.563173
COL3A1	P02461	P02461	CO3A1_HUMAN	Collagen alpha-1(III) chain	0.115478	0.138667	0.0494085	0.86286
COL4A1	P02462	P02462;P29400	CO4A1_HUMAN	Collagen alpha-1(IV) chain	0.375209	1.23842	0.612891	0.158228
CRYAB	P02511	P02511	CRYAB_HUMAN	Alpha-crystallin B chain	1.28411	2.0227	1.15082	0.0374825
LMNA	P02545	P02545	LMNA_HUMAN	Prelamin-A/C	-0.0366313	-0.26315	0.0981181	0.741766
APOA1	P02647	P02647	APOA1_HUMAN	Apolipoprotein A-I	0.435565	0.916758	0.419249	0.278131
APOE	P02649	P02649	APOE_HUMAN	Apolipoprotein E	0.309268	0.858983	0.386721	0.306696
APOA2	P02652	P02652	APOA2_HUMAN	Apolipoprotein A-II	0.195912	0.481087	0.193272	0.552109
APOC3	P02656	P02656	APOC3_HUMAN	Apolipoprotein C-III	0.170553	0.426504	0.168273	0.59544
FGA	P02671	P02671	FIBA_HUMAN	Fibrinogen alpha chain	0.440502	0.805538	0.357294	0.334594
FGB	P02675	P02675	FIBB_HUMAN	Fibrinogen beta chain	0.429047	0.805603	0.35733	0.334619
FGG	P02679	P02679	FIBG_HUMAN	Fibrinogen gamma chain	0.410062	0.768562	0.337319	0.354759
MBP	P02686	P02686	MBP_HUMAN	Myelin basic protein	-0.73444	-1.80234	0.992836	0.0560088
APCS	P02743	P02743	SAMP_HUMAN	Serum amyloid P-component	0.109022	0.477564	0.191636	0.555024
C1QB	P02746	P02746	C1QB_HUMAN	Complement C1q subcomponent subunit B	0.161729	0.565687	0.233531	0.487785
C1QC	P02747	P02747	C1QC_HUMAN	Complement C1q subcomponent subunit C	0.309936	0.389766	0.151884	0.62741
C9	P02748	P02748;Cont_Q3MHN2	CO9_HUMAN	Complement component C9	0.0734448	0.180446	0.0652961	0.822817
APOH	P02749	P02749	APOH_HUMAN	Beta-2-glycoprotein 1	0.180893	0.472409	0.189247	0.559056
LRG1	P02750	P02750	A2GL_HUMAN	Leucine-rich alpha-2-glycoprotein	0.260656	0.776193	0.341415	0.350804
FN1	P02751	P02751;Cont_P07589	FINC_HUMAN	Fibronectin	0.174358	0.422869	0.166636	0.598587
RBP4	P02753	P02753;Cont_P18902	RET4_HUMAN	Retinol-binding protein 4	0.365093	1.53021	0.804207	0.0932214
AMBP	P02760	P02760	AMBP_HUMAN	Protein AMBP	0.0459594	0.169561	0.0611121	0.833497
ORM1	P02763	P02763	A1AG1_HUMAN	Alpha-1-acid glycoprotein 1	0.542527	0.769293	0.337711	0.354491
AHSG	P02765	P02765	FETUA_HUMAN	Alpha-2-HS-glycoprotein	0.350474	1.02221	0.48047	0.232199
TTR	P02766	P02766	TTHY_HUMAN	Transthyretin	0.331551	0.937473	0.43109	0.268294
ALB	P02768	P02768	ALBU_HUMAN	Albumin	0.374822	1.02407	0.481571	0.231428
GC	P02774	P02774	VTDB_HUMAN	Vitamin D-binding protein	0.372204	1.07024	0.509113	0.213679
TFRC	P02786	P02786	TFR1_HUMAN	Transferrin receptor protein 1	-0.332106	-0.856859	0.385539	0.307839
TF	P02787	P02787	TRFE_HUMAN	Serotransferrin	0.427132	1.42739	0.735321	0.112935
LTF	P02788	P02788;Cont_Q29443	TRFL_HUMAN	Lactotransferrin	1.68711	1.27156	0.633941	0.149056
HPX	P02790	P02790	HEMO_HUMAN	Hemopexin	0.407108	1.0926	0.522604	0.205291
FTL	P02792	P02792	FRIL_HUMAN	Ferritin light chain	0.956704	1.69774	0.919352	0.0682935
FTH1	P02794	P02794	FRIH_HUMAN	Ferritin heavy chain	0.741769	1.08659	0.518965	0.207511
ESR1	P03372	P03372	ESR1_HUMAN	Estrogen receptor	1.4272	3.91631	2.54007	0.00144952
MT-ND1	P03886	P03886	NU1M_HUMAN	NADH-ubiquinone oxidoreductase chain 1	0.88502	2.48687	1.49265	0.0160208
MT-ND2	P03891	P03891	NU2M_HUMAN	NADH-ubiquinone oxidoreductase chain 2	0.362588	0.585333	0.243139	0.472705
MT-ND4	P03905	P03905	NU4M_HUMAN	NADH-ubiquinone oxidoreductase chain 4	0.326753	2.54704	1.53744	0.014422
C4BPA	P04003	P04003	C4BPA_HUMAN	C4b-binding protein alpha chain	-0.00412194	-0.00655008	0.00221941	0.993575
VTN	P04004	P04004	VTNC_HUMAN	Vitronectin	0.138168	0.375422	0.14558	0.639425
CAT	P04040	P04040	CATA_HUMAN	Catalase	-0.443666	-2.46841	1.47893	0.0165766
GBA1	P04062	P04062	GBA1_HUMAN	Lysosomal acid glucosylceramidase	0.719082	2.21313	1.28999	0.0262586
FUCA1	P04066	P04066	FUCO_HUMAN	Tissue alpha-L-fucosidase	-0.840645	-3.38094	2.15543	0.00339934
ALDOA	P04075	P04075	ALDOA_HUMAN	Fructose-bisphosphate aldolase A	0.388668	4.74589	3.10508	0.000425703
CSTB	P04080	P04080	CYTB_HUMAN	Cystatin-B	-0.149284	-1.08052	0.515301	0.209708
ANXA1	P04083	P04083	ANXA1_HUMAN	Annexin A1	-0.741	-3.29137	2.08984	0.00394162
APOB	P04114	P04114	APOB_HUMAN	Apolipoprotein B-100	0.216604	0.469676	0.187983	0.561319
NR3C1	P04150	P04150	GCR_HUMAN	Glucocorticoid receptor	-0.0763827	-0.722256	0.312753	0.383047
PRNP	P04156	P04156	PRIO_HUMAN	Major prion protein	0.247957	1.14787	0.55636	0.185863
SOD2	P04179	P04179	SODM_HUMAN	Superoxide dismutase [Mn], mitochondrial	0.398478	1.81898	1.00462	0.0543491
OAT	P04181	P04181	OAT_HUMAN	Ornithine aminotransferase, mitochondrial	-0.622761	-2.11126	1.21529	0.0318008
HRG	P04196	P04196	HRG_HUMAN	Histidine-rich glycoprotein	0.366581	1.19395	0.58494	0.170887
THY1	P04216	P04216	THY1_HUMAN	Thy-1 membrane glycoprotein	1.2682	6.09028	3.93112	7.77328e-05
A1BG	P04217	P04217	A1BG_HUMAN	Alpha-1B-glycoprotein	0.32573	0.736365	0.320184	0.374412
CD74	P04233	P04233	HG2A_HUMAN	HLA class II histocompatibility antigen gamma chain	1.25792	6.9099	4.38256	3.00429e-05
TUBB4A	P04350	P04350	TBB4A_HUMAN	Tubulin beta-4A chain	0.0675104	0.189817	0.0689234	0.813676
GAPDH	P04406	P04406	G3P_HUMAN	Glyceraldehyde-3-phosphate dehydrogenase	0.876152	9.63801	5.65242	3.83387e-05
ASL	P04424	P04424	ARLY_HUMAN	Argininosuccinate lyase	-0.0942107	-0.658374	0.279704	0.423181
HLA-A	P04439	P04439	HLAA_HUMAN	HLA class I histocompatibility antigen, A alpha chain	0.0301797	0.137993	0.0491557	0.863085
ERBB2	P04626	P04626	ERBB2_HUMAN	Receptor tyrosine-protein kinase erbB-2	0.0942323	1.15263	0.559293	0.184182
CAPNS1	P04632	P04632	CPNS1_HUMAN	Calpain small subunit 1	0.36167	3.98854	2.59085	0.00133176
TP53	P04637	P04637	P53_HUMAN	Cellular tumor antigen p53	0	NaN	NaN	1
HSPB1	P04792	P04792	HSPB1_HUMAN	Heat shock protein beta-1	-0.214695	-1.13195	0.546578	0.191391
RPN1	P04843	P04843	RPN1_HUMAN	Dolichyl-diphosphooligosaccharide--protein glycosyltransferase subunit 1	0.671605	8.21784	5.03157	2.0654e-05
RPN2	P04844	P04844	RPN2_HUMAN	Dolichyl-diphosphooligosaccharide--protein glycosyltransferase subunit 2	0.611681	4.92997	3.22478	0.00036286
GNAI2	P04899	P04899	GNAI2_HUMAN	Guanine nucleotide-binding protein G(i) subunit alpha-2	-0.36534	-2.09497	1.2034	0.0327784
SLC4A2	P04920	P04920;P48751	B3A2_HUMAN	Anion exchange protein 2	0.324101	1.48623	0.774564	0.101268
ATP1A1	P05023	P05023	AT1A1_HUMAN	Sodium/potassium-transporting ATPase subunit alpha-1	0.312953	2.74109	1.68207	0.010276
ATP1B1	P05026	P05026	AT1B1_HUMAN	Sodium/potassium-transporting ATPase subunit beta-1	0.169709	1.34142	0.678916	0.131596
APP	P05067	P05067	A4_HUMAN	Amyloid-beta precursor protein	0.477347	2.55095	1.54035	0.0143462
ARG1	P05089	P05089	ARGI1_HUMAN	Arginase-1	-0.0674751	-0.0999937	0.0351157	0.899391
APOD	P05090	P05090	APOD_HUMAN	Apolipoprotein D	-0.385255	-0.621608	0.261134	0.447412
ALDH2	P05091	P05091;O94788	ALDH2_HUMAN	Aldehyde dehydrogenase, mitochondrial	0.74135	3.99708	2.59684	0.00131075
ITGB2	P05107	P05107	ITB2_HUMAN	Integrin beta-2	0.34789	0.860079	0.387331	0.306323
S100A8	P05109	P05109	S10A8_HUMAN	Protein S100-A8	0.156374	0.184828	0.0669894	0.818379
HMGN1	P05114	P05114	HMGN1_HUMAN	Non-histone chromosomal protein HMG-14	0.735067	4.31747	2.8184	0.000801739
SLC25A5	P05141	P05141;P12236;P12235;Q9H0C2	ADT2_HUMAN	ADP/ATP translocase 2	-0.208151	-0.968875	0.449213	0.254397
SERPING1	P05155	P05155	IC1_HUMAN	Plasma protease C1 inhibitor	0.351722	0.678053	0.28978	0.410725
CFI	P05156	P05156	CFAI_HUMAN	Complement factor I	0.458841	2.34198	1.3851	0.0207607
ISG15	P05161	P05161	ISG15_HUMAN	Ubiquitin-like protein ISG15	0.413901	1.27084	0.633478	0.149259
MPO	P05164	P05164	PERM_HUMAN	Myeloperoxidase	0.335576	0.434652	0.171956	0.588892
PCCA	P05165	P05165	PCCA_HUMAN	Propionyl-CoA carboxylase alpha chain, mitochondrial	-0.0752281	-1.04116	0.491713	0.224862
PCCB	P05166	P05166	PCCB_HUMAN	Propionyl-CoA carboxylase beta chain, mitochondrial	-0.0494735	-0.535881	0.219139	0.50948
ALPL	P05186	P05186	PPBT_HUMAN	Alkaline phosphatase, tissue-nonspecific isozyme	-0.388931	-1.22993	0.607524	0.160634
EIF2S1	P05198	P05198	IF2A_HUMAN	Eukaryotic translation initiation factor 2 subunit 1	0.27328	5.8937	3.81717	0.000108352
ICAM1	P05362	P05362	ICAM1_HUMAN	Intercellular adhesion molecule 1	-0.183469	-0.438532	0.173716	0.585957
RPLP1	P05386	P05386	RLA1_HUMAN	Large ribosomal subunit protein P1	1.1641	6.75957	4.30252	4.51745e-05
RPLP2	P05387	P05387	RLA2_HUMAN	Large ribosomal subunit protein P2	0.984673	6.75618	4.3007	4.50358e-05
RPLP0	P05388	P05388	RLA0_HUMAN	Large ribosomal subunit protein uL10	1.1516	9.351	5.53316	3.42857e-05
JUN	P05412	P05412	JUN_HUMAN	Transcription factor Jun	0.480384	1.23012	0.607644	0.160586
FABP3	P05413	P05413	FABPH_HUMAN	Fatty acid-binding protein, heart	2.6559	3.85059	2.49361	0.0016003
POLR3D	P05423	P05423	RPC4_HUMAN	DNA-directed RNA polymerase III subunit RPC4	0.867886	3.17466	2.00397	0.00478089
CLEC3B	P05452	P05452;Cont_Q2KIS7	TETN_HUMAN	Tetranectin	0.137828	0.539806	0.221022	0.506761
SSB	P05455	P05455	LA_HUMAN	Lupus La protein	0.0934962	0.713204	0.30801	0.388138
SERPIND1	P05546	P05546	HEP2_HUMAN	Heparin cofactor 2	0.360361	0.976471	0.453629	0.251115
ITGB1	P05556	P05556	ITB1_HUMAN	Integrin beta-1	0.296232	2.871	1.77884	0.00820652
COL5A2	P05997	P05997	CO5A2_HUMAN	Collagen alpha-2(V) chain	-0.119163	-0.203802	0.0743805	0.800112
UROD	P06132	P06132	DCUP_HUMAN	Uroporphyrinogen decarboxylase	0.750808	5.67527	3.68788	0.000137741
INSR	P06213	P06213	INSR_HUMAN	Insulin receptor	-0.0838444	-0.634335	0.267525	0.439405
FYN	P06241	P06241	FYN_HUMAN	Tyrosine-protein kinase Fyn	0.546032	2.00909	1.14095	0.0384644
GLA	P06280	P06280	AGAL_HUMAN	Alpha-galactosidase A	0.157433	2.20349	1.28289	0.026714
IGKV4-1	P06312	P06312	KV401_HUMAN	Immunoglobulin kappa variable 4-1	0.325886	0.518922	0.211052	0.522304
GSN	P06396	P06396;Cont_Q3SX14	GELS_HUMAN	Gelsolin	0.851873	5.33587	3.48124	0.000203431
RB1	P06400	P06400	RB_HUMAN	Retinoblastoma-associated protein	0.655608	1.95093	1.09895	0.0426515
PGR	P06401	P06401	PRGR_HUMAN	Progesterone receptor	0.476143	1.3957	0.714401	0.119429
PTMA	P06454	P06454	PTMA_HUMAN	Prothymosin alpha	0.501074	3.21352	2.03262	0.00447365
CDK1	P06493	P06493	CDK1_HUMAN	Cyclin-dependent kinase 1	-0.340359	-0.421136	0.165857	0.6
ATP5F1B	P06576	P06576	ATPB_HUMAN	ATP synthase subunit beta, mitochondrial	-0.199857	-1.24691	0.61826	0.155873
C2	P06681	P06681	CO2_HUMAN	Complement C2	-0.110396	-0.347809	0.133599	0.663833
S100A9	P06702	P06702	S10A9_HUMAN	Protein S100-A9	0.265785	0.351119	0.135024	0.660959
S100A6	P06703	P06703	S10A6_HUMAN	Protein S100-A6	-1.29365	-7.9258	4.89363	1.87793e-05
APOA4	P06727	P06727	APOA4_HUMAN	Apolipoprotein A-IV	0.28378	0.524057	0.213493	0.51825
EIF4E	P06730	P06730	IF4E_HUMAN	Eukaryotic translation initiation factor 4E	0.730515	7.88626	4.87467	1.84332e-05
CKM	P06732	P06732	KCRM_HUMAN	Creatine kinase M-type	-0.695391	-3.94627	2.56117	0.00137819
ENO1	P06733	P06733	ENOA_HUMAN	Alpha-enolase	1.17417	9.12035	5.43514	3.07692e-05
PYGL	P06737	P06737	PYGL_HUMAN	Glycogen phosphorylase, liver form	-0.0241431	-0.138869	0.0494841	0.862893
GPI	P06744	P06744	G6PI_HUMAN	Glucose-6-phosphate isomerase	1.17762	11.5068	6.36345	9.91736e-05
POLB	P06746	P06746	DPOLB_HUMAN	DNA polymerase beta	0.447863	9.08388	5.41946	3.04569e-05
NPM1	P06748	P06748	NPM_HUMAN	Nucleophosmin	1.24239	7.851	4.85769	1.82371e-05
TPM3	P06753	P06753	TPM3_HUMAN	Tropomyosin alpha-3 chain	-0.398925	-2.65591	1.61857	0.0120208
ITGAV	P06756	P06756	ITAV_HUMAN	Integrin alpha-V	-0.226241	-2.44724	1.46319	0.0172282
HEXA	P06865	P06865	HEXA_HUMAN	Beta-hexosaminidase subunit alpha	-0.0385012	-0.167673	0.0603895	0.835179
SERPINE2	P07093	P07093	GDN_HUMAN	Glia-derived nexin	-0.60123	-2.08583	1.19673	0.0332933
EPHX1	P07099	P07099	HYEP_HUMAN	Epoxide hydrolase 1	-1.14165	-5.5875	3.63512	0.000136273
DBI	P07108	P07108	ACBP_HUMAN	Acyl-CoA-binding protein	0.314007	2.28813	1.34527	0.0228818
LDHB	P07195	P07195;P07864;Q6ZMR3;P00338;Cont_Q5E9B1	LDHB_HUMAN	L-lactate dehydrogenase B chain	-0.190872	-1.38432	0.706925	0.121767
CENPB	P07199	P07199	CENPB_HUMAN	Major centromere autoantigen B	1.16635	6.75572	4.30045	4.49898e-05
GPX1	P07203	P07203	GPX1_HUMAN	Glutathione peroxidase 1	0.891032	9.03674	5.39912	2.97767e-05
PGK2	P07205	P07205	PGK2_HUMAN	Phosphoglycerate kinase 2	0.288034	2.58778	1.56779	0.0135781
PROS1	P07225	P07225	PROS_HUMAN	Vitamin K-dependent protein S	0.146772	0.481791	0.1936	0.551545
P4HB	P07237	P07237	PDIA1_HUMAN	Protein disulfide-isomerase	0.578134	4.0432	2.6291	0.00123065
H1-0	P07305	P07305	H10_HUMAN	Histone H1.0	0.716943	5.55122	3.61317	0.000134299
ACYP1	P07311	P07311	ACYP1_HUMAN	Acylphosphatase-1	-1.21073	-8.91506	5.34621	2.89157e-05
CRYGA;CRYGB;CRYGC	P07315;P07316;P11844	P07315;P11844;P07316	CRGA_HUMAN;CRGB_HUMAN;CRGC_HUMAN	Gamma-crystallin C	0.416207	1.15053	0.558	0.184975
FES	P07332	P16591;P07332	FES_HUMAN	Tyrosine-protein kinase Fes/Fps	0.967922	2.90753	1.80602	0.00770142
CTSD	P07339	P07339	CATD_HUMAN	Cathepsin D	-1.51848	-7.05553	4.45898	2.2805e-05
ANXA2	P07355	P07355;A6NMY6	ANXA2_HUMAN	Annexin A2	0.224519	2.36974	1.40567	0.0197467
C8A	P07357	P07357	CO8A_HUMAN	Complement component C8 alpha chain	0.564511	0.950107	0.438356	0.262668
C8B	P07358	P07358	CO8B_HUMAN	Complement component C8 beta chain	0.328468	0.872884	0.39448	0.299487
C8G	P07360	P07360	CO8G_HUMAN	Complement component C8 gamma chain	0.164145	0.251039	0.0931982	0.753518
CAPN1	P07384	P07384	CAN1_HUMAN	Calpain-1 catalytic subunit	0.366914	5.19722	3.39479	0.00025641
DCN	P07585	P07585	PGS2_HUMAN	Decorin	0.341339	0.602636	0.251682	0.460996
PSAP	P07602	P07602	SAP_HUMAN	Prosaposin	-1.37758	-5.93343	3.84039	0.00010358
HEXB	P07686	P07686	HEXB_HUMAN	Beta-hexosaminidase subunit beta	-0.323018	-1.54876	0.816787	0.090135
CTSL	P07711	P07711	CATL1_HUMAN	Procathepsin L	0.451469	2.74979	1.68855	0.0101059
PFN1	P07737	P07737;Cont_P02584	PROF1_HUMAN	Profilin-1	0.94024	16.2299	7.78625	0
BPGM	P07738	P07738	PMGE_HUMAN	Bisphosphoglycerate mutase	-0.191803	-0.539638	0.220941	0.506802
APRT	P07741	P07741	APT_HUMAN	Adenine phosphoribosyltransferase	1.15648	9.37113	5.54162	3.46821e-05
EPRS1	P07814	P07814	SYEP_HUMAN	Bifunctional glutamate/proline--tRNA ligase	0.477502	9.88006	5.75074	4.33213e-05
CTSB	P07858	P07858	CATB_HUMAN	Cathepsin B	0.342411	1.74548	0.952754	0.0625375
HSP90AA1	P07900	P07900	HS90A_HUMAN	Heat shock protein HSP 90-alpha	-0.858012	-8.66448	5.23542	2.537e-05
GALT	P07902	P07902	GALT_HUMAN	Galactose-1-phosphate uridylyltransferase	0.461041	2.22184	1.29639	0.0258441
HNRNPC	P07910	P07910	HNRPC_HUMAN	Heterogeneous nuclear ribonucleoproteins C1/C2	0.628731	5.98366	3.8696	8.68891e-05
UQCRH	P07919	P07919	QCR6_HUMAN	Cytochrome b-c1 complex subunit 6, mitochondrial	0.243786	1.49056	0.777471	0.100415
LAMB1	P07942	P07942	LAMB1_HUMAN	Laminin subunit beta-1	-0.773619	-1.41847	0.729418	0.114822
YES1	P07947	P12931;P07947;P06241	YES_HUMAN	Tyrosine-protein kinase Yes	-0.23486	-1.70867	0.926978	0.0669346
LYN	P07948	P08631;P07948	LYN_HUMAN	Tyrosine-protein kinase Lyn	-0.141107	-0.724308	0.313831	0.381861
FH	P07954	P07954	FUMH_HUMAN	Fumarate hydratase, mitochondrial	-0.237123	-1.84642	1.02411	0.0517497
ZFX;ZFY	P08048;P17010	P08048;P17010	ZFX_HUMAN;ZFY_HUMAN	Zinc finger Y-chromosomal protein	0.839393	6.17633	3.98028	7.39496e-05
IGF1R	P08069	P08069	IGF1R_HUMAN	Insulin-like growth factor 1 receptor	0.0817834	0.771205	0.338736	0.353515
COL1A2	P08123	P08123;Cont_P02465	CO1A2_HUMAN	Collagen alpha-2(I) chain	0.291799	0.377175	0.146348	0.638315
ANXA6	P08133	P08133	ANXA6_HUMAN	Annexin A6	0.758167	1.89075	1.05575	0.0476927
RHOC	P08134	P08134	RHOC_HUMAN	Rho-related GTP-binding protein RhoC	0.47385	2.51265	1.51184	0.015344
CD55	P08174	P08174	DAF_HUMAN	Complement decay-accelerating factor	0.290909	1.05976	0.502822	0.217811
SLC3A2	P08195	P08195	4F2_HUMAN	4F2 cell-surface antigen heavy chain	0.372339	2.76438	1.69942	0.00985055
GUSB	P08236	P08236	BGLR_HUMAN	Beta-glucuronidase	0.0128896	0.066968	0.023225	0.932606
PFKM	P08237	P08237	PFKAM_HUMAN	ATP-dependent 6-phosphofructokinase, muscle type	1.45181	7.46605	4.66858	1.58311e-05
HSP90AB1	P08238	P08238	HS90B_HUMAN	Heat shock protein HSP 90-beta	-0.20511	-2.52367	1.52004	0.0150334
SRPRA	P08240	P08240	SRPRA_HUMAN	Signal recognition particle receptor subunit alpha	1.1974	7.77076	4.81884	1.77253e-05
ASNS	P08243	P08243	ASNS_HUMAN	Asparagine synthetase [glutamine-hydrolyzing]	0.882374	3.36569	2.14428	0.00349173
GSTA1	P08263	P08263;Q7RTV2	GSTA1_HUMAN	Glutathione S-transferase A1	-4.87326	-5.40154	3.52178	0.00017064
SOD3	P08294	P08294	SODE_HUMAN	Extracellular superoxide dismutase [Cu-Zn]	0.232116	0.533822	0.218154	0.510881
HMBS	P08397	P08397	HEM3_HUMAN	Porphobilinogen deaminase	0.680679	7.06126	4.46197	2.28833e-05
PDHA1	P08559	P08559;P29803	ODPA_HUMAN	Pyruvate dehydrogenase E1 component subunit alpha, somatic form, mitochondrial	0.0246782	0.190896	0.0693427	0.812645
CD14	P08571	P08571	CD14_HUMAN	Monocyte differentiation antigen CD14	0.638327	3.65881	2.35677	0.00208011
COL4A2	P08572	P08572	CO4A2_HUMAN	Collagen alpha-2(IV) chain	0.35659	1.08894	0.520386	0.206777
CYC1	P08574	P08574	CY1_HUMAN	Cytochrome c1, heme protein, mitochondrial	0.286698	1.79725	0.989236	0.0565717
PTPRC	P08575	P08575	PTPRC_HUMAN	Receptor-type tyrosine-protein phosphatase C	-0.0332007	-0.116844	0.0412941	0.883788
SNRPB2	P08579	P08579	RU2B_HUMAN	U2 small nuclear ribonucleoprotein B''	0.458925	5.31512	3.46838	0.000211037
CFH	P08603	P08603	CFAH_HUMAN	Complement factor H	0.20306	0.682531	0.292086	0.407946
SNRNP70	P08621	P08621	RU17_HUMAN	U1 small nuclear ribonucleoprotein 70 kDa	0.503348	3.86373	2.50292	0.00156949
FCGR3A	P08637	P08637	FCG3A_HUMAN	Low affinity immunoglobulin gamma Fc region receptor III-A	0.767507	2.28195	1.34071	0.0231237
NFIC	P08651	Q14938;Q12857;O00712;P08651	NFIC_HUMAN	Nuclear factor 1 C-type	0.906145	8.4148	5.1225	2.27273e-05
VIM	P08670	P08670	VIME_HUMAN	Vimentin	0.901118	2.39682	1.42575	0.01891
RPS17	P08708	P08708	RS17_HUMAN	Small ribosomal subunit protein eS17	1.00398	8.57188	5.19384	2.43902e-05
GNAI3	P08754	P08754	GNAI3_HUMAN	Guanine nucleotide-binding protein G(i) subunit alpha-3	-0.118945	-0.63332	0.267013	0.43991
ANXA5	P08758	P08758	ANXA5_HUMAN	Annexin A5	-0.120603	-0.644366	0.27259	0.432451
RPSA	P08865	A0A8I5KQE6;P08865	RSSA_HUMAN	Small ribosomal subunit protein uS2	1.19898	11.029	6.19159	7.79221e-05
CD63	P08962	P08962	CD63_HUMAN	CD63 antigen	0.0569821	0.370009	0.143216	0.644038
MRPL3	P09001	P09001	RM03_HUMAN	Large ribosomal subunit protein uL3m	0.0160139	0.122669	0.0434476	0.878113
SNRPA	P09012	P09012	SNRPA_HUMAN	U1 small nuclear ribonucleoprotein A	0.375957	3.80096	2.45838	0.00170877
FGF2	P09038	P09038	FGF2_HUMAN	Fibroblast growth factor 2	1.03842	1.92516	1.08041	0.0448631
ENO2	P09104	P09104	ENOG_HUMAN	Gamma-enolase	-1.25492	-9.87029	5.74681	4.30108e-05
ACAA1	P09110	P09110	THIK_HUMAN	3-ketoacyl-CoA thiolase, peroxisomal	0.0537164	0.399195	0.156056	0.618965
SRP19	P09132	P09132	SRP19_HUMAN	Signal recognition particle 19 kDa protein	0.0664761	0.153457	0.0549796	0.848778
GSTA2	P09210	P08263;P09210;Q7RTV2;Q16772	GSTA2_HUMAN	Glutathione S-transferase A2	-3.08001	-7.98344	4.92116	1.91388e-05
GSTP1	P09211	P09211	GSTP1_HUMAN	Glutathione S-transferase P	0.345936	2.11351	1.21693	0.0316941
SNRPC	P09234	P09234	RU1C_HUMAN	U1 small nuclear ribonucleoprotein C	0.481174	3.62308	2.33108	0.00221482
LGALS1	P09382	P09382	LEG1_HUMAN	Galectin-1	0.369862	1.43722	0.741842	0.110938
QDPR	P09417	P09417	DHPR_HUMAN	Dihydropteridine reductase	0.956035	8.84063	5.31357	2.8103e-05
HMGB1	P09429	P09429	HMGB1_HUMAN	High mobility group protein B1	1.04185	6.37156	4.09026	5.37153e-05
RBP1	P09455	P09455	RET1_HUMAN	Retinol-binding protein 1	-0.139722	-0.769145	0.337631	0.354515
FBP1	P09467	O00757;P09467	F16P1_HUMAN	Fructose-1,6-bisphosphatase 1	0.706013	4.19212	2.73243	0.000985774
GNAO1	P09471	P09471	GNAO_HUMAN	Guanine nucleotide-binding protein G(o) subunit alpha	1.25079	3.13236	1.97275	0.0051691
TPM1	P09493	P09493;P06753	TPM1_HUMAN	Tropomyosin alpha-1 chain	-0.405535	-2.13435	1.23217	0.0304635
CLTA	P09496	P09496	CLCA_HUMAN	Clathrin light chain A	-0.450691	-5.23018	3.41545	0.000245283
CLTB	P09497	P09497	CLCB_HUMAN	Clathrin light chain B	0.290119	4.2086	2.74378	0.000960471
ANXA4	P09525	P09525	ANXA4_HUMAN	Annexin A4	-0.570041	-2.75216	1.69032	0.0100519
CNP	P09543	P09543	CN37_HUMAN	2',3'-cyclic-nucleotide 3'-phosphodiesterase	0.318686	3.33011	2.11824	0.00370876
PDGFRB	P09619	P09619	PGFRB_HUMAN	Platelet-derived growth factor receptor beta	-0.253375	-0.388223	0.151203	0.628766
DLD	P09622	P09622	DLDH_HUMAN	Dihydrolipoyl dehydrogenase, mitochondrial	0.00404477	0.0491335	0.0169241	0.950126
HNRNPA1	P09651	P09651	ROA1_HUMAN	Heterogeneous nuclear ribonucleoprotein A1	0.658449	4.38659	2.86541	0.000747529
SNRPA1	P09661	P09661	RU2A_HUMAN	U2 small nuclear ribonucleoprotein A'	0.483534	4.72084	3.08863	0.000423249
CTSH	P09668	P09668	CATH_HUMAN	Pro-cathepsin H	-0.75203	-2.00548	1.13834	0.0387051
COX6C	P09669	P09669	COX6C_HUMAN	Cytochrome c oxidase subunit 6C	-0.243924	-1.03883	0.490327	0.225654
TACSTD2	P09758	P09758	TACD2_HUMAN	Tumor-associated calcium signal transducer 2	0.253814	1.05828	0.501935	0.218339
C1S	P09871	P09871	C1S_HUMAN	Complement C1s subcomponent	0.523861	1.23177	0.608684	0.160095
PARP1	P09874	P09874	PARP1_HUMAN	Poly [ADP-ribose] polymerase 1	1.24128	10.2412	5.8938	5.21739e-05
IFIT2	P09913	P09913	IFIT2_HUMAN	Interferon-induced protein with tetratricopeptide repeats 2	1.27983	2.32217	1.37044	0.0215106
IFIT1	P09914	P09914	IFIT1_HUMAN	Interferon-induced protein with tetratricopeptide repeats 1	0.163835	1.19692	0.586797	0.17009
UCHL1	P09936	P09936	UCHL1_HUMAN	Ubiquitin carboxyl-terminal hydrolase isozyme L1	-3.3202	-5.84024	3.78579	0.000109548
LTA4H	P09960	P09960	LKHA4_HUMAN	Leukotriene A-4 hydrolase	1.49009	14.5089	7.31766	0
ALDOC	P09972	P09972	ALDOC_HUMAN	Fructose-bisphosphate aldolase C	0.711819	4.60652	3.01305	0.000541527
C4A	P0C0L4	P0C0L4;Cont_P01030	CO4A_HUMAN	Complement C4-A	0.0319788	0.0674951	0.0234125	0.932088
C4B_2	P0C0L5	P0C0L4;P0C0L5;Cont_P01030	CO4B_HUMAN	Complement C4-B	0.0803494	0.229497	0.0845429	0.774651
H2AZ1;H2AZ2	P0C0S5;Q71UI9	P0C0S5;Q71UI9	H2AV_HUMAN;H2AZ_HUMAN	Histone H2A.Z	0.463264	3.01858	1.88851	0.00632475
H2AC12;H2AC14;H2AC17;H2AC7	P0C0S8;P20671;Q96KK5;Q99878	P0C0S8;P04908;Q6FI13;P20671;Q9BTM1;Q99878;Q7L7L0;Q93077;Q16777;Q96KK5	H2A1D_HUMAN;H2A1H_HUMAN;H2A1J_HUMAN;H2A1_HUMAN	Histone H2A type 1	0.492412	6.03016	3.89651	7.61301e-05
TFPT	P0C1Z6	P0C1Z6	TFPT_HUMAN	TCF3 fusion partner	0.855284	3.37507	2.15113	0.00343217
ATXN1L	P0C7T5	P0C7T5	ATX1L_HUMAN	Ataxin-1-like	0.965403	2.32341	1.37136	0.0214742
JMJD7	P0C870	P0C870	JMJD7_HUMAN	Bifunctional peptidase and (3S)-lysyl hydroxylase JMJD7	-0.51141	-2.89654	1.79785	0.00781555
POLR2M	P0CAP2	P0CAP2	GRL1A_HUMAN	DNA-directed RNA polymerase II subunit GRINL1A	1.4485	4.21218	2.74625	0.000954067
OCM;OCM2	P0CE71;P0CE72	P0CE71;P0CE72	OCM2_HUMAN;ONCO_HUMAN	Putative oncomodulin-2	1.46849	3.66732	2.36288	0.00206452
DERPC	P0CG12	P0CG12	DERPC_HUMAN	Decreased expression in renal and prostate cancer protein	-0.242697	-4.70146	3.07587	0.000439604
POTEJ	P0CG39	P0CG38;P0CG39;Q9BYX7	POTEJ_HUMAN	POTE ankyrin domain family member J	0.0229361	0.114263	0.0403429	0.886021
ZNF888	P0CJ79	P0CJ79	ZN888_HUMAN	Zinc finger protein 888	0.92943	3.21938	2.03693	0.00443752
LIMS3;LIMS4	P0CW19;P0CW20	P0CW19;P0CW20	LIMS3_HUMAN;LIMS4_HUMAN	LIM and senescent cell antigen-like-containing domain protein 3	1.5699	4.75825	3.11318	0.000422009
TRAPPC2;TRAPPC2B	P0DI81;P0DI82	P0DI82;P0DI81	TPC2A_HUMAN;TPC2B_HUMAN	Trafficking protein particle complex subunit 2	-0.499755	-1.16007	0.563891	0.181754
PET100	P0DJ07	P0DJ07	PT100_HUMAN	Protein PET100 homolog, mitochondrial	-1.32593	-2.57212	1.55612	0.013946
HSPA1A;HSPA1B	P0DMV8;P0DMV9	P0DMV9;P0DMV8	HS71A_HUMAN;HS71B_HUMAN	Heat shock 70 kDa protein 1A	0.301146	3.89946	2.52818	0.00149561
IGLC2;IGLC3	P0DOY2;P0DOY3	P0DOY3;P0CF74;P0DOY2;B9A064;A0M8Q6;P0CG04	IGLC2_HUMAN;IGLC3_HUMAN	Immunoglobulin lambda constant 2	0.260353	0.631953	0.266326	0.440759
CALM1;CALM2;CALM3	P0DP23;P0DP24;P0DP25	P0DP24;P0DP25;P0DP23	CALM1_HUMAN;CALM2_HUMAN;CALM3_HUMAN	Calmodulin-1	-0.722509	-13.6562	7.06621	0
POLR1D	P0DPB6	P0DPB6	RPAC2_HUMAN	DNA-directed RNA polymerases I and III subunit RPAC2	0.629905	5.25328	3.42989	0.000238237
EEF1AKMT4;EEF1AKMT4-ECE2	P0DPD7;P0DPD8	P0DPD7;P0DPD8	EFCE2_HUMAN;EFMT4_HUMAN	EEF1A lysine methyltransferase 4	0	NaN	NaN	1
AMY1A;AMY1B;AMY1C	P0DTE7;P0DTE8;P0DUB6	P0DTE7;P0DUB6;P19961;P0DTE8;P04746;Cont_Q3MHH8	AMY1A_HUMAN;AMY1B_HUMAN;AMY1C_HUMAN	Alpha-amylase 1B	-0.816986	-1.91973	1.07652	0.0453475
ZFTRAF1	P0DTL6	P0DTL6	ZTRF1_HUMAN	Zinc finger TRAF-type-containing protein 1	0.108213	0.208905	0.0763849	0.794917
FDX1	P10109	P10109	ADX_HUMAN	Adrenodoxin, mitochondrial	-2.24528	-3.99376	2.59452	0.00131395
RO60	P10155	P10155	RO60_HUMAN	RNA-binding protein RO60	0.231136	3.16648	1.99794	0.00486127
GAA	P10253	P10253	LYAG_HUMAN	Lysosomal alpha-glucosidase	0.515165	1.96842	1.11156	0.0414051
AR	P10275	P10275	ANDR_HUMAN	Androgen receptor	3.0063	17.6664	8.14317	0
RRAS	P10301	P10301	RRAS_HUMAN	Ras-related protein R-Ras	0.594729	3.00878	1.88124	0.00643769
HLA-C	P10321	P10321	HLAC_HUMAN	HLA class I histocompatibility antigen, C alpha chain	0.0144567	0.030994	0.0106017	0.968543
ARAF	P10398	P10398	ARAF_HUMAN	Serine/threonine-protein kinase A-Raf	0.894785	3.96286	2.57283	0.0013619
DLAT	P10515	P10515	ODP2_HUMAN	Dihydrolipoyllysine-residue acetyltransferase component of pyruvate dehydrogenase complex, mitochondrial	-0.977354	-7.614	4.74209	1.65746e-05
PTPRF	P10586	P10586	PTPRF_HUMAN	Receptor-type tyrosine-protein phosphatase F	0.0274163	0.127737	0.0453287	0.872937
NR2F6	P10588	P10588;P24468	NR2F6_HUMAN	Nuclear receptor subfamily 2 group F member 6	0.740972	1.9623	1.10714	0.0417944
NR2F1	P10589	P10589;P24468	COT1_HUMAN	COUP transcription factor 1	0.48565	1.98749	1.12532	0.0399038
TXN	P10599	P10599	THIO_HUMAN	Thioredoxin	-0.960696	-5.99958	3.87882	8.09969e-05
COX5B	P10606	P10606	COX5B_HUMAN	Cytochrome c oxidase subunit 5B, mitochondrial	-0.342309	-2.25113	1.31797	0.0245385
CTSA	P10619	P10619	PPGB_HUMAN	Lysosomal protective protein	-0.255599	-1.85119	1.02751	0.0512957
MGST1	P10620	P10620	MGST1_HUMAN	Microsomal glutathione S-transferase 1	0.376342	1.20313	0.590684	0.168293
C7	P10643	P10643	CO7_HUMAN	Complement component C7	0.0528007	0.112366	0.0396448	0.887771
PRKAR1A	P10644	P10644	KAP0_HUMAN	cAMP-dependent protein kinase type I-alpha regulatory subunit	0.76972	4.71488	3.08471	0.000432754
ALPG	P10696	P10696	PPBN_HUMAN	Alkaline phosphatase, germ cell type	1.22751	2.86906	1.7774	0.00823529
UROS	P10746	P10746	HEM4_HUMAN	Uroporphyrinogen-III synthase	1.71052	9.58694	5.63141	3.7037e-05
ESD	P10768	P10768	ESTD_HUMAN	S-formylglutathione hydrolase	0.653434	4.60332	3.01093	0.000541007
HSPD1	P10809	P10809	CH60_HUMAN	60 kDa heat shock protein, mitochondrial	-0.342474	-2.3435	1.38623	0.020694
CLU	P10909	P10909	CLUS_HUMAN	Clusterin	0.988692	3.30204	2.09767	0.00387902
HSPA5	P11021	P11021	BIP_HUMAN	Endoplasmic reticulum chaperone BiP	0.164761	1.24258	0.615522	0.157159
LAMC1	P11047	P11047	LAMC1_HUMAN	Laminin subunit gamma-1	0.491293	2.15424	1.24674	0.0292986
ACP2	P11117	P11117	PPAL_HUMAN	Lysosomal acid phosphatase	-0.528954	-4.25255	2.77399	0.000889078
MAP2	P11137	P11137	MTAP2_HUMAN	Microtubule-associated protein 2	-0.633095	-1.35981	0.690887	0.127337
HSPA8	P11142	P11142;P54652	HSP7C_HUMAN	Heat shock cognate 71 kDa protein	-0.523285	-7.95161	4.90598	1.89274e-05
SLC2A1	P11166	P11166	GTR1_HUMAN	Solute carrier family 2, facilitated glucose transporter member 1	0.169237	0.833608	0.372669	0.319649
EPB41	P11171	P11171	EPB41_HUMAN	Protein 4.1	2.31045	2.30683	1.35909	0.022113
UMPS	P11172	P11172	UMPS_HUMAN	Uridine 5'-monophosphate synthase	0.489112	6.63194	4.23361	4.70127e-05
PDHB	P11177	P11177	ODPB_HUMAN	Pyruvate dehydrogenase E1 component subunit beta, mitochondrial	0.0718299	0.516667	0.209982	0.524001
DBT	P11182	P11182	ODB2_HUMAN	Lipoamide acyltransferase component of branched-chain alpha-keto acid dehydrogenase complex, mitochondrial	0.141664	1.28309	0.641307	0.146251
ITGAM	P11215	P11215	ITAM_HUMAN	Integrin alpha-M	0.0256808	0.0516032	0.0177916	0.94785
PYGB	P11216	P06737;P11217;P11216	PYGB_HUMAN	Glycogen phosphorylase, brain form	-0.884904	-6.9398	4.39834	3.04348e-05
PYGM	P11217	P11217	PYGM_HUMAN	Glycogen phosphorylase, muscle form	-0.329004	-1.21339	0.597116	0.165124
RALA	P11233	P11233	RALA_HUMAN	Ras-related protein Ral-A	0.361269	4.43865	2.90062	0.000679108
RALB	P11234	P11234	RALB_HUMAN	Ras-related protein Ral-B	-0.331072	-4.50686	2.94651	0.000625407
BCR	P11274	P11274	BCR_HUMAN	Breakpoint cluster region protein	0.258934	4.6318	3.02983	0.000521571
LAMP1	P11279	P11279	LAMP1_HUMAN	Lysosome-associated membrane glycoprotein 1	-0.613629	-4.20359	2.74033	0.000973563
ACADM	P11310	P11310	ACADM_HUMAN	Medium-chain specific acyl-CoA dehydrogenase, mitochondrial	-1.17721	-4.20443	2.74091	0.000968934
TOP1	P11387	P11387	TOP1_HUMAN	DNA topoisomerase 1	0.854695	7.8767	4.87007	1.83486e-05
TOP2A	P11388	P11388	TOP2A_HUMAN	DNA topoisomerase 2-alpha	0.245489	0.375381	0.145562	0.639356
G6PD	P11413	P11413	G6PD_HUMAN	Glucose-6-phosphate 1-dehydrogenase	-0.0968063	-0.91001	0.415412	0.281244
UBL4A	P11441	P11441	UBL4A_HUMAN	Ubiquitin-like protein 4A	0.752675	5.97151	3.86254	8.97138e-05
PC	P11498	P11498	PYC_HUMAN	Pyruvate carboxylase, mitochondrial	-0.960632	-6.38124	4.09566	5.41028e-05
DMD	P11532	P11532	DMD_HUMAN	Dystrophin	0.276532	2.07563	1.1893	0.0338555
MTHFD1	P11586	P11586	C1TC_HUMAN	C-1-tetrahydrofolate synthase, cytoplasmic	1.38955	13.5459	7.03265	0
IGF2R	P11717	P11717	MPRI_HUMAN	Cation-independent mannose-6-phosphate receptor	0.117614	0.728043	0.315796	0.379712
ADH5	P11766	P11766	ADHX_HUMAN	Alcohol dehydrogenase class-3	0.70961	5.59233	3.63803	0.000136638
CDK4	P11802	P11802	CDK4_HUMAN	Cyclin-dependent kinase 4	2.07364	3.26618	2.07135	0.00409794
PRPS2	P11908	P21108;P11908;P60891	PRPS2_HUMAN	Ribose-phosphate pyrophosphokinase 2	0.379654	3.4851	2.2313	0.00283584
PABPC1	P11940	P11940;Q9H361	PABP1_HUMAN	Polyadenylate-binding protein 1	0.383197	5.20772	3.40138	0.000257762
PCNA	P12004	P12004	PCNA_HUMAN	Proliferating cell nuclear antigen	0.403551	2.26661	1.32939	0.0238246
HARS1	P12081	P12081;P49590	HARS1_HUMAN	Histidine--tRNA ligase, cytoplasmic	0.237694	6.23754	4.015	7.5278e-05
COL6A1	P12109	P12109	CO6A1_HUMAN	Collagen alpha-1(VI) chain	-0.108191	-0.242351	0.0896925	0.762355
COL6A2	P12110	P12110	CO6A2_HUMAN	Collagen alpha-2(VI) chain	-0.0750206	-0.173187	0.0625021	0.829809
COL6A3	P12111	P12111	CO6A3_HUMAN	Collagen alpha-3(VI) chain	-0.135341	-0.272854	0.102089	0.733067
SLC25A4	P12235	P12235	ADT1_HUMAN	ADP/ATP translocase 1	-0.702044	-3.90575	2.53262	0.00147207
SLC25A6	P12236	P12236	ADT3_HUMAN	ADP/ATP translocase 3	0.141853	0.827726	0.369432	0.322727
IMPDH2	P12268	P12268	IMDH2_HUMAN	Inosine-5'-monophosphate dehydrogenase 2	1.08908	8.35462	5.09489	2.20183e-05
TPR	P12270	P12270	TPR_HUMAN	Nucleoprotein TPR	0.418464	5.56171	3.61952	0.000134921
PIP	P12273	P12273	PIP_HUMAN	Prolactin-inducible protein	-0.41041	-0.452956	0.180292	0.574669
CKB	P12277	P12277	KCRB_HUMAN	Creatine kinase B-type	-2.1776	-6.36327	4.08563	5.35236e-05
ANXA3	P12429	P12429	ANXA3_HUMAN	Annexin A3	0.907427	5.2071	3.40099	0.000257611
CKMT1B	P12532	P12532	KCRU_HUMAN	Creatine kinase U-type, mitochondrial	-1.10967	-4.106	2.67283	0.00109947
BCKDHA	P12694	P12694	ODBA_HUMAN	2-oxoisovalerate dehydrogenase subunit alpha, mitochondrial	1.03551	5.94056	3.84454	9.47288e-05
ACTN1	P12814	P12814;P35609	ACTN1_HUMAN	Alpha-actinin-1	0.473315	3.38362	2.15738	0.00339721
ACE	P12821	P12821	ACE_HUMAN	Angiotensin-converting enzyme	-0.0862732	-0.236783	0.0874564	0.767586
CDH1	P12830	P12830	CADH1_HUMAN	Cadherin-1	-0.470652	-2.52091	1.51798	0.0151208
SRC	P12931	P12931	SRC_HUMAN	Proto-oncogene tyrosine-protein kinase Src	0.0496479	0.342398	0.131274	0.66858
PEPD	P12955	P12955	PEPD_HUMAN	Xaa-Pro dipeptidase	0.32399	1.79028	0.984303	0.0573054
XRCC6	P12956	P12956	XRCC6_HUMAN	X-ray repair cross-complementing protein 6	0.995945	10.674	6.0597	6.45161e-05
XRCC5	P13010	P13010	XRCC5_HUMAN	X-ray repair cross-complementing protein 5	0.952265	9.95641	5.78134	4.46097e-05
UNG	P13051	P13051	UNG_HUMAN	Uracil-DNA glycosylase	0.420499	1.80065	0.991634	0.056169
COX4I1	P13073	P13073	COX41_HUMAN	Cytochrome c oxidase subunit 4 isoform 1, mitochondrial	-0.362405	-1.90289	1.06444	0.0466685
LAMP2	P13473	P13473	LAMP2_HUMAN	Lysosome-associated membrane glycoprotein 2	0.189173	1.54076	0.811356	0.0914591
RNH1	P13489	P13489	RINI_HUMAN	Ribonuclease inhibitor	0.636057	7.42179	4.64639	1.54639e-05
CYP4B1	P13584	P13584	CP4B1_HUMAN	Cytochrome P450 4B1	-0.670636	-2.0398	1.16323	0.0363298
VCAN	P13611	P13611	CSPG2_HUMAN	Versican core protein	0.440549	0.600469	0.250608	0.46251
EEF2	P13639	P13639	EF2_HUMAN	Elongation factor 2	0.843852	13.8593	7.12737	0
PDIA4	P13667	P13667	PDIA4_HUMAN	Protein disulfide-isomerase A4	0.193483	0.804669	0.356822	0.335085
C6	P13671	P13671	CO6_HUMAN	Complement component C6	-0.557089	-1.71345	0.930316	0.0663799
P4HA1	P13674	P13674	P4HA1_HUMAN	Prolyl 4-hydroxylase subunit alpha-1	-0.460926	-3.55458	2.28164	0.00252228
TPT1	P13693	Q56UQ5;P13693	TCTP_HUMAN	Translationally-controlled tumor protein	0.347075	3.70394	2.38914	0.00194356
ALAD	P13716	P13716	HEM2_HUMAN	Delta-aminolevulinic acid dehydratase	0.457727	4.03472	2.62318	0.00122832
HLA-E	P13747	P13747	HLAE_HUMAN	HLA class I histocompatibility antigen, alpha chain E	-0.36637	-1.10159	0.52805	0.202217
LCP1	P13796	P13796	PLSL_HUMAN	Plastin-2	0.342208	1.95685	1.10322	0.0422299
PLS3	P13797	P13797	PLST_HUMAN	Plastin-3	0.250733	1.59387	0.847562	0.0826767
APEH	P13798	P13798	ACPH_HUMAN	Acylamino-acid-releasing enzyme	0.708689	4.20247	2.73956	0.000972746
ETFA	P13804	P13804	ETFA_HUMAN	Electron transfer flavoprotein subunit alpha, mitochondrial	0.251032	2.15352	1.24622	0.0293499
GYS1	P13807	P13807	GYS1_HUMAN	Glycogen [starch] synthase, muscle	0.811137	9.64739	5.65626	3.84615e-05
PRKAR2A	P13861	P13861	KAP2_HUMAN	cAMP-dependent protein kinase type II-alpha regulatory subunit	-0.610289	-4.37568	2.85801	0.000759268
ENO3	P13929	P13929	ENOB_HUMAN	Beta-enolase	0.155427	0.566004	0.233685	0.487579
GTF2F2	P13984	P13984	T2FB_HUMAN	General transcription factor IIF subunit 2	0.454552	4.56774	2.98724	0.000577947
CD59	P13987	P13987	CD59_HUMAN	CD59 glycoprotein	0.2832	1.57599	0.835332	0.0855854
MTHFD2	P13995	P13995	MTDC_HUMAN	Bifunctional methylenetetrahydrofolate dehydrogenase/cyclohydrolase, mitochondrial	0.461621	0.876321	0.396405	0.297794
MIF	P14174	P14174	MIF_HUMAN	Macrophage migration inhibitory factor	0.693628	0.74462	0.324554	0.369548
CD99	P14209	P14209	CD99_HUMAN	CD99 antigen	-0.639694	-3.24387	2.05495	0.00427794
PRKCSH	P14314	P14314	GLU2B_HUMAN	Glucosidase 2 subunit beta	0.802934	9.25146	5.4911	3.26087e-05
HCLS1	P14317	P14317	HCLS1_HUMAN	Hematopoietic lineage cell-specific protein	0.278894	1.10853	0.53227	0.199556
FDPS	P14324	P14324	FPPS_HUMAN	Farnesyl pyrophosphate synthase	0.760282	3.80674	2.46249	0.00169345
TRIM27	P14373	P14373	TRI27_HUMAN	Zinc finger protein RFP	0.23661	1.97629	1.11723	0.040858
COX7A2	P14406	P14406	CX7A2_HUMAN	Cytochrome c oxidase subunit 7A2, mitochondrial	-0.483153	-2.80164	1.72719	0.00922338
NID1	P14543	P14543	NID1_HUMAN	Nidogen-1	0.44835	1.6699	0.899991	0.0719856
AKR1A1	P14550	P14550	AK1A1_HUMAN	Aldo-keto reductase family 1 member A1	0.805481	9.18707	5.4637	3.2e-05
PKM	P14618	P14618	KPYM_HUMAN	Pyruvate kinase PKM	0.496762	7.50654	4.68881	1.60214e-05
ACYP2	P14621	P14621	ACYP2_HUMAN	Acylphosphatase-2	-0.128459	-1.00893	0.47263	0.237477
HSP90B1	P14625	P14625	ENPL_HUMAN	Endoplasmin	0.289491	1.65466	0.889425	0.0739759
CCNB1	P14635	P14635	CCNB1_HUMAN	G2/mitotic-specific cyclin-B1	0	NaN	NaN	1
MYL6B	P14649	P14649	MYL6B_HUMAN	Myosin light chain 6B	1.67796	3.64867	2.34948	0.00212201
SNRPB;SNRPN	P14678;P63162	P14678;P63162	RSMB_HUMAN;RSMN_HUMAN	Small nuclear ribonucleoprotein-associated proteins B and B'	0.609865	3.86257	2.5021	0.00156771
IDE	P14735	P14735	IDE_HUMAN	Insulin-degrading enzyme	-0.354016	-5.31718	3.46966	0.000211165
COX6B1	P14854	P14854	CX6B1_HUMAN	Cytochrome c oxidase subunit 6B1	-0.149641	-1.44192	0.744966	0.110071
POU2F1	P14859	P14859;Q9UKI9	PO2F1_HUMAN	POU domain, class 2, transcription factor 1	0.717208	3.71213	2.395	0.00192453
HNRNPL	P14866	P14866	HNRPL_HUMAN	Heterogeneous nuclear ribonucleoprotein L	0.4777	3.45674	2.21068	0.00294837
DARS1	P14868	P14868	SYDC_HUMAN	Aspartate--tRNA ligase, cytoplasmic	0.547776	9.976	5.78916	4.51128e-05
JUP	P14923	P14923	PLAK_HUMAN	Junction plakoglobin	0.58093	5.66194	3.6799	0.000139822
UQCRB	P14927	P14927	QCR7_HUMAN	Cytochrome b-c1 complex subunit 7	0.211578	1.33754	0.676398	0.132478
BRAF	P15056	P15056	BRAF_HUMAN	Serine/threonine-protein kinase B-raf	-0.0518626	-0.472709	0.189385	0.558898
GLUL	P15104	P15104	GLNA_HUMAN	Glutamine synthetase	-0.342352	-1.23546	0.611016	0.159048
AKR1B1	P15121	P15121	ALDR_HUMAN	Aldo-keto reductase family 1 member B1	0.359135	1.8243	1.00839	0.053887
PVR	P15151	P15151	PVR_HUMAN	Poliovirus receptor	0.176815	1.04191	0.49216	0.224576
RAC2	P15153	P15153	RAC2_HUMAN	Ras-related C3 botulinum toxin substrate 2	0.909172	2.39499	1.42439	0.0189673
GSPT1	P15170	P15170	ERF3A_HUMAN	Eukaryotic peptide chain release factor GTP-binding subunit ERF3A	0.550324	10.5699	6.02035	6.15385e-05
ARSA	P15289	P15289	ARSA_HUMAN	Arylsulfatase A	-2.17142	-3.51646	2.25404	0.00269239
B4GALT1	P15291	P15291	B4GT1_HUMAN	Beta-1,4-galactosyltransferase 1	0.22257	1.76541	0.966764	0.0600913
EZR	P15311	P15311;P35241;P26038	EZRI_HUMAN	Ezrin	-1.39227	-8.17655	5.0123	2.02703e-05
ATP6V1B1	P15313	P15313	VATB1_HUMAN	V-type proton ATPase subunit B, kidney isoform	0.189926	0.307175	0.116332	0.700321
FOLR1	P15328	P15328	FOLR1_HUMAN	Folate receptor alpha	0.865272	4.03731	2.62498	0.00122979
UCHL3	P15374	P15374	UCHL3_HUMAN	Ubiquitin carboxyl-terminal hydrolase isozyme L3	0.389971	3.11316	1.95856	0.00533374
CD46	P15529	P15529	MCP_HUMAN	Membrane cofactor protein	-1.28203	-3.04915	1.91118	0.00599759
NME1	P15531	P15531	NDKA_HUMAN	Nucleoside diphosphate kinase A	1.45944	7.96179	4.91084	1.89573e-05
NQO1	P15559	P15559	NQO1_HUMAN	NAD(P)H dehydrogenase [quinone] 1	-2.10635	-5.48619	3.57363	0.000144237
GNS	P15586	P15586	GNS_HUMAN	N-acetylglucosamine-6-sulfatase	-0.653209	-3.88401	2.51727	0.00152606
PHKG2	P15735	P15735	PHKG2_HUMAN	Phosphorylase b kinase gamma catalytic chain, liver/testis isoform	-0.0726359	-0.597272	0.249026	0.464385
RPS2	P15880	P15880	RS2_HUMAN	Small ribosomal subunit protein uS5	1.17558	10.9894	6.17708	7.5e-05
DSP	P15924	P15924	DESP_HUMAN	Desmoplakin	0.0298735	0.34234	0.131249	0.668518
RPA2	P15927	P15927	RFA2_HUMAN	Replication protein A 32 kDa subunit	0.653054	11.8483	6.48247	0.000110092
MUC1	P15941	P15941	MUC1_HUMAN	Mucin-1	0.62362	3.68156	2.3731	0.00201295
ALOX15	P16050	P16050	LOX15_HUMAN	Polyunsaturated fatty acid lipoxygenase ALOX15	-3.39943	-5.66449	3.68142	0.000137268
NPR1	P16066	P16066	ANPRA_HUMAN	Atrial natriuretic peptide receptor 1	1.62611	2.76059	1.6966	0.00989939
CD44	P16070	P16070	CD44_HUMAN	CD44 antigen	-0.328989	-0.817649	0.363906	0.328306
NQO2	P16083	P16083	NQO2_HUMAN	Ribosyldihydronicotinamide dehydrogenase [quinone]	0.0732953	0.136225	0.0484942	0.864918
ITGB4	P16144	P16144	ITB4_HUMAN	Integrin beta-4	0.24763	1.65358	0.888682	0.0741213
CBR1	P16152	P16152	CBR1_HUMAN	Carbonyl reductase [NADPH] 1	0.506293	2.4186	1.44192	0.018153
ACADS	P16219	P16219	ACADS_HUMAN	Short-chain specific acyl-CoA dehydrogenase, mitochondrial	-0.633073	-1.80383	0.993885	0.0558675
CREB1	P16220	P18846;P16220	CREB1_HUMAN	Cyclic AMP-responsive element-binding protein 1	0.962683	5.24757	3.42632	0.00024019
GLB1	P16278	P16278	BGAL_HUMAN	Beta-galactosidase	-0.25147	-2.11443	1.21761	0.0316504
PPP3CB	P16298	P16298	PP2BB_HUMAN	Serine/threonine-protein phosphatase 2B catalytic subunit beta isoform	0.290002	2.83045	1.74865	0.00881437
NCK1	P16333	P16333	NCK1_HUMAN	Cytoplasmic protein NCK1	0.453572	5.01669	3.28043	0.000327113
GCFC2	P16383	P16383	GCFC2_HUMAN	Intron Large complex component GCFC2	0.0922582	0.645819	0.273326	0.431552
H1-5	P16401	P16401	H15_HUMAN	Histone H1.5	1.90409	3.32781	2.11657	0.00371962
H1-2	P16403	Q02539;P16402;P10412;P16401;P16403	H12_HUMAN	Histone H1.2	0.523876	3.23817	2.05076	0.00430297
EPCAM	P16422	P16422	EPCAM_HUMAN	Epithelial cell adhesion molecule	-0.210189	-1.59958	0.851474	0.0818295
POR	P16435	P16435	NCPR_HUMAN	NADPH--cytochrome P450 reductase	-0.44451	-2.55114	1.54049	0.0143458
MGMT	P16455	P16455	MGMT_HUMAN	Methylated-DNA--protein-cysteine methyltransferase	0.820469	3.69448	2.38236	0.00197112
ATP2A2	P16615	P16615	AT2A2_HUMAN	Sarcoplasmic/endoplasmic reticulum calcium ATPase 2	-0.900198	-8.29796	5.06876	2.13144e-05
PLCG2	P16885	P16885	PLCG2_HUMAN	1-phosphatidylinositol 4,5-bisphosphate phosphodiesterase gamma-2	-0.652913	-2.67071	1.6296	0.0116654
FAH	P16930	P16930	FAAA_HUMAN	Fumarylacetoacetase	2.27748	8.38964	5.11098	2.24719e-05
STMN1	P16949	P16949	STMN1_HUMAN	Stathmin	1.01375	7.43097	4.651	1.56047e-05
YBX3	P16989	P16989	YBOX3_HUMAN	Y-box-binding protein 3	0.00828926	0.0463884	0.0159617	0.952689
ZNF22	P17026	P17026	ZNF22_HUMAN	Zinc finger protein 22	1.11711	6.93819	4.3975	3.04017e-05
ZNF24	P17028	P17028	ZNF24_HUMAN	Zinc finger protein 24	0.164965	1.03373	0.487296	0.227805
ZKSCAN1	P17029	P17029	ZKSC1_HUMAN	Zinc finger protein with KRAB and SCAN domains 1	-0.0142853	-0.138747	0.0494382	0.862907
NAGA	P17050	P17050	NAGAB_HUMAN	Alpha-N-acetylgalactosaminidase	-0.318666	-2.24556	1.31386	0.0248055
HSPA6	P17066	P0DMV9;P0DMV8;P48741;P17066	HSP76_HUMAN	Heat shock 70 kDa protein 6	0.170964	2.18892	1.27219	0.027475
HMGA1	P17096	P17096	HMGA1_HUMAN	High mobility group protein HMG-I/HMG-Y	1.69558	8.03015	4.94336	1.93861e-05
TMEM11	P17152	P17152	TMM11_HUMAN	Transmembrane protein 11, mitochondrial	-0.225426	-1.40885	0.723067	0.116835
GOT1	P17174	P17174	AATC_HUMAN	Aspartate aminotransferase, cytoplasmic	-0.243923	-1.76103	0.96368	0.060564
PRKCA	P17252	P17252	KPCA_HUMAN	Protein kinase C alpha type	0.430957	2.69852	1.65033	0.0110911
ITGA2	P17301	P17301	ITA2_HUMAN	Integrin alpha-2	0.502851	1.76925	0.96947	0.0596918
GJA1	P17302	P17302	CXA1_HUMAN	Gap junction alpha-1 protein	-0.472501	-2.45286	1.46737	0.0170399
SMPD1	P17405	P17405	ASM_HUMAN	Sphingomyelin phosphodiesterase	0.818213	2.41444	1.43883	0.0182949
UBTF	P17480	P17480	UBF1_HUMAN	Nucleolar transcription factor 1	1.06551	9.66543	5.66366	3.8961e-05
HOXB6	P17509	P09630;P31267;P09067;P20719;P31274;P09629;P28356;Q00444;P17481;P31268;P31273;P17482;P17509	HXB6_HUMAN	Homeobox protein Hox-B6	0.0471277	0.121301	0.0429412	0.879265
JUND	P17535	P17535	JUND_HUMAN	Transcription factor JunD	0.209443	1.2196	0.601021	0.163423
NDUFB7	P17568	P17568	NDUB7_HUMAN	NADH dehydrogenase [ubiquinone] 1 beta subcomplex subunit 7	-0.127596	-0.266077	0.0993132	0.739307
PRKACA	P17612	P22694;P17612	KAPCA_HUMAN	cAMP-dependent protein kinase catalytic subunit alpha	-0.427366	-3.75021	2.42222	0.001813
CAPN2	P17655	P17655	CAN2_HUMAN	Calpain-2 catalytic subunit	0.078954	0.660355	0.280714	0.422147
DES	P17661	P17661	DESM_HUMAN	Desmin	-0.463673	-0.82401	0.367392	0.324896
HLA-G	P17693	P17693	HLAG_HUMAN	HLA class I histocompatibility antigen, alpha chain G	0.023069	0.0730511	0.0253934	0.92731
PTPN2	P17706	P17706	PTN2_HUMAN	Tyrosine-protein phosphatase non-receptor type 2	1.42944	4.7485	3.10679	0.000426131
CTPS1	P17812	P17812	PYRG1_HUMAN	CTP synthase 1	0.499398	1.81171	0.999466	0.0550923
DDX5	P17844	P17844	DDX5_HUMAN	Probable ATP-dependent RNA helicase DDX5	-0.366866	-3.27447	2.07744	0.00404774
PFKL	P17858	P08237;P17858	PFKAL_HUMAN	ATP-dependent 6-phosphofructokinase, liver type	0.664747	7.08717	4.47544	2.31481e-05
GM2A	P17900	P17900	SAP3_HUMAN	Ganglioside GM2 activator	-0.38503	-1.37786	0.702686	0.123211
LGALS3	P17931	P17931	LEG3_HUMAN	Galectin-3	0.243404	1.46	0.757011	0.106378
PSMC3	P17980	P17980	PRS6A_HUMAN	26S proteasome regulatory subunit 6A	0.114956	2.68482	1.64012	0.0113638
TCP1	P17987	P17987	TCPA_HUMAN	T-complex protein 1 subunit alpha	0.0866269	2.38646	1.41806	0.0192044
PTPN1	P18031	P18031	PTN1_HUMAN	Tyrosine-protein phosphatase non-receptor type 1	-0.234599	-2.94049	1.83052	0.00724714
IGFBP2	P18065	P18065;Cont_P13384	IBP2_HUMAN	Insulin-like growth factor-binding protein 2	0.381063	0.788375	0.347983	0.344003
ERCC2	P18074	P18074	ERCC2_HUMAN	General transcription and DNA repair factor IIH helicase subunit XPD	0.550577	2.22558	1.29915	0.0257116
RPL35A	P18077	P18077	RL35A_HUMAN	Large ribosomal subunit protein eL33	1.085	8.68729	5.24561	2.59179e-05
ITGB5	P18084	P18084	ITB5_HUMAN	Integrin beta-5	0.299698	5.38139	3.50937	0.000186683
ARF4	P18085	P18085	ARF4_HUMAN	ADP-ribosylation factor 4	0.00931446	0.128619	0.0456565	0.872049
RPL7	P18124	P18124	RL7_HUMAN	Large ribosomal subunit protein uL30	1.2638	9.60404	5.63845	3.75e-05
VCL	P18206	P18206	VINC_HUMAN	Vinculin	0.889505	7.74247	4.80508	1.74419e-05
GPX2	P18283	P18283	GPX2_HUMAN	Glutathione peroxidase 2	-1.30514	-4.50449	2.94493	0.000630698
PTPRA	P18433	P18433	PTPRA_HUMAN	Receptor-type tyrosine-protein phosphatase alpha	0.640081	6.38821	4.09954	5.42005e-05
NAT1	P18440	P18440	ARY1_HUMAN	Arylamine N-acetyltransferase 1	0.0470893	0.644139	0.272475	0.432567
IL1RN	P18510	P18510	IL1RA_HUMAN	Interleukin-1 receptor antagonist protein	1.78506	4.59987	3.00863	0.000544322
ITGB6	P18564	P18564	ITB6_HUMAN	Integrin beta-6	0.223975	1.75618	0.960274	0.0611613
SON	P18583	P18583	SON_HUMAN	Protein SON	0.171901	1.70226	0.922509	0.0677627
NELFE	P18615	P18615	NELFE_HUMAN	Negative elongation factor E	0.321457	2.39081	1.42129	0.0190723
RPL17	P18621	P18621	RL17_HUMAN	Large ribosomal subunit protein uL22	1.19885	8.45214	5.13955	2.3166e-05
PGAM1	P18669	P18669	PGAM1_HUMAN	Phosphoglycerate mutase 1	0.482193	2.56623	1.55173	0.0140341
RCC1	P18754	P18754	RCC1_HUMAN	Regulator of chromosome condensation	1.57989	12.0298	6.54452	0.000123711
SDC1	P18827	P18827	SDC1_HUMAN	Syndecan-1	-1.71518	-3.29309	2.09111	0.00393119
ATF6	P18850	P18850	ATF6A_HUMAN	Cyclic AMP-dependent transcription factor ATF-6 alpha	0.797	3.9452	2.56042	0.00137766
LIG1	P18858	P18858	DNLI1_HUMAN	DNA ligase 1	0.0387428	0.319424	0.121491	0.689197
ATP5PF	P18859	P18859	ATP5J_HUMAN	ATP synthase-coupling factor 6, mitochondrial	-0.282847	-1.72917	0.941312	0.0644825
XRCC1	P18887	P18887	XRCC1_HUMAN	DNA repair protein XRCC1	0.770801	7.26744	4.56823	2.46002e-05
PAM	P19021	P19021	AMD_HUMAN	Peptidyl-glycine alpha-amidating monooxygenase	2.28923	5.051	3.30232	0.000303769
CDH2	P19022	P19022	CADH2_HUMAN	Cadherin-2	2.41676	5.68714	3.69498	0.000135359
GNAZ	P19086	P19086	GNAZ_HUMAN	Guanine nucleotide-binding protein G(z) subunit alpha	-1.24083	-2.52682	1.52239	0.0149413
PLCG1	P19174	P19174	PLCG1_HUMAN	1-phosphatidylinositol 4,5-bisphosphate phosphodiesterase gamma-1	0.57489	4.32467	2.82331	0.0008
NCL	P19338	P19338	NUCL_HUMAN	Nucleolin	1.34904	8.15653	5.00293	1.99336e-05
HK1	P19367	P19367	HXK1_HUMAN	Hexokinase-1	-1.14553	-11.4664	6.34915	9.52381e-05
POLR2C	P19387	P19387	RPB3_HUMAN	DNA-directed RNA polymerase II subunit RPB3	0.45203	8.63077	5.22033	2.51046e-05
POLR2E	P19388	P19388	RPAB1_HUMAN	DNA-directed RNA polymerases I, II, and III subunit RPABC1	0.45994	4.80784	3.1456	0.000407235
NDUFV2	P19404	P19404	NDUV2_HUMAN	NADH dehydrogenase [ubiquinone] flavoprotein 2, mitochondrial	0.327235	4.40102	2.87519	0.000724977
ERCC3	P19447	P19447	ERCC3_HUMAN	General transcription and DNA repair factor IIH helicase subunit XPB	0.23495	0.983253	0.457581	0.248162
TRIM21	P19474	P19474	RO52_HUMAN	E3 ubiquitin-protein ligase TRIM21	0.438496	6.22553	4.0082	7.48936e-05
EIF2AK2	P19525	P19525	E2AK2_HUMAN	Interferon-induced, double-stranded RNA-activated protein kinase	0.0875852	1.34636	0.682126	0.130498
WT1	P19544	P19544	WT1_HUMAN	Wilms tumor protein	0.799053	1.22098	0.601889	0.163018
SRM	P19623	P19623	SPEE_HUMAN	Spermidine synthase	1.78917	12.6885	6.763	0.000166667
ORM2	P19652	P19652	A1AG2_HUMAN	Alpha-1-acid glycoprotein 2	0.215432	0.399592	0.156233	0.618661
CSNK2A2	P19784	P19784	CSK22_HUMAN	Casein kinase II subunit alpha'	-0.05018	-0.590906	0.245883	0.468963
RXRA	P19793	P19793	RXRA_HUMAN	Retinoic acid receptor RXR-alpha	1.30778	10.0222	5.80755	4.61538e-05
ITIH2	P19823	P19823	ITIH2_HUMAN	Inter-alpha-trypsin inhibitor heavy chain H2	0.191754	0.629502	0.265093	0.441992
ITIH1	P19827	P19827	ITIH1_HUMAN	Inter-alpha-trypsin inhibitor heavy chain H1	0.109344	0.428527	0.169186	0.593652
NFKB1	P19838	P19838	NFKB1_HUMAN	Nuclear factor NF-kappa-B p105 subunit	1.04496	15.852	7.68744	0
TYMP	P19971	P19971	TYPH_HUMAN	Thymidine phosphorylase	-0.512976	-1.91135	1.07051	0.0459838
ATP2B1	P20020	P20020	AT2B1_HUMAN	Plasma membrane calcium-transporting ATPase 1	0.875513	7.16816	4.51733	2.38095e-05
HLA-DPA1	P20036	P20036	DPA1_HUMAN	HLA class II histocompatibility antigen, DP alpha 1 chain	-0.0933878	-0.159636	0.0573244	0.843011
EIF2S2	P20042	P20042	IF2B_HUMAN	Eukaryotic translation initiation factor 2 subunit 2	0.24952	3.57319	2.2951	0.00244615
ANXA7	P20073	P20073	ANXA7_HUMAN	Annexin A7	-0.651075	-6.56253	4.19576	4.9952e-05
TBP	P20226	Q6SJ96;P20226	TBP_HUMAN	TATA-box-binding protein	0.558028	1.75487	0.959353	0.061333
TPSAB1;TPSB2	P20231;Q15661	Q15661;P20231	TRYB1_HUMAN;TRYB2_HUMAN	Tryptase beta-2	0.59692	1.27872	0.638509	0.147266
BTF3	P20290	P20290	BTF3_HUMAN	Transcription factor BTF3	1.25277	10.9833	6.17482	7.45342e-05
ALOX5AP	P20292	P20292	AL5AP_HUMAN	Arachidonate 5-lipoxygenase-activating protein	0.907087	3.58196	2.30143	0.00242076
RAB4A	P20338	P20338	RAB4A_HUMAN	Ras-related protein Rab-4A	-0.991048	-13.1818	6.92006	0
RAB5A	P20339	P20339	RAB5A_HUMAN	Ras-related protein Rab-5A	0.351274	4.40117	2.87529	0.000725304
RAB6A	P20340	Q9NRW1;P20340;Q9H0N0	RAB6A_HUMAN	Ras-related protein Rab-6A	-0.235999	-5.24047	3.42189	0.000244365
MSH3	P20585	P20585	MSH3_HUMAN	DNA mismatch repair protein Msh3	0.42847	5.34537	3.48712	0.000203806
MX1	P20591	P20591	MX1_HUMAN	Interferon-induced GTP-binding protein Mx1	-0.632335	-1.3788	0.7033	0.123048
PSMB1	P20618	P20618	PSB1_HUMAN	Proteasome subunit beta type-1	0.256864	5.59429	3.63921	0.000136729
M6PR	P20645	P20645	MPRD_HUMAN	Cation-dependent mannose-6-phosphate receptor	0.691384	1.91096	1.07023	0.0460068
COX5A	P20674	P20674	COX5A_HUMAN	Cytochrome c oxidase subunit 5A, mitochondrial	-0.414845	-2.32479	1.37237	0.0214182
LMNB1	P20700	P20700	LMNB1_HUMAN	Lamin-B1	1.66421	10.1192	5.84594	4.8583e-05
PZP	P20742	P20742	PZP_HUMAN	Pregnancy zone protein	-1.44038	-3.58999	2.30722	0.00239016
OGN	P20774	P20774	MIME_HUMAN	Mimecan	0.25168	0.466875	0.186689	0.563325
CAST	P20810	P20810	ICAL_HUMAN	Calpastatin	-1.0892	-7.23259	4.55042	2.43309e-05
IMPDH1	P20839	P20839	IMDH1_HUMAN	Inosine-5'-monophosphate dehydrogenase 1	0.369979	1.5781	0.836775	0.0852461
COL5A1	P20908	P20908	CO5A1_HUMAN	Collagen alpha-1(V) chain	-0.688855	-0.984216	0.458143	0.247729
AGA	P20933	P20933	ASPG_HUMAN	N(4)-(beta-N-acetylglucosaminyl)-L-asparaginase	0.451575	1.72722	0.93995	0.064697
RASA1	P20936	P20936	RASA1_HUMAN	Ras GTPase-activating protein 1	0.144739	2.12248	1.22349	0.0311924
PTMS	P20962	P20962	PTMS_HUMAN	Parathymosin	1.12141	5.38853	3.51377	0.000179663
CDK11B	P21127	Q9UQ88;P21127	CD11B_HUMAN	Cyclin-dependent kinase 11B	0.413798	5.03634	3.29298	0.000313639
GSTM3	P21266	P21266	GSTM3_HUMAN	Glutathione S-transferase Mu 3	0.747511	2.13155	1.23012	0.0306109
ATP6V1B2	P21281	P21281	VATB2_HUMAN	V-type proton ATPase subunit B, brain isoform	-0.162048	-1.5971	0.849776	0.0822396
ATP6V1C1	P21283	P21283	VATC1_HUMAN	V-type proton ATPase subunit C 1	0.19294	1.62132	0.866412	0.0785255
CSRP1	P21291	P21291	CSRP1_HUMAN	Cysteine and glycine-rich protein 1	1.36873	9.14706	5.44659	3.13316e-05
FLNA	P21333	P21333	FLNA_HUMAN	Filamin-A	0.806044	3.36106	2.14089	0.00351635
NF1	P21359	P21359	NF1_HUMAN	Neurofibromin	1.64548	3.5692	2.29222	0.00246508
MAOA	P21397	P21397	AOFA_HUMAN	Amine oxidase [flavin-containing] A	-1.04268	-3.87805	2.51305	0.00153566
ACO1	P21399	P21399	ACOHC_HUMAN	Cytoplasmic aconitate hydratase	0.770442	7.98109	4.92004	1.90779e-05
NT5E	P21589	P21589	5NTD_HUMAN	5'-nucleotidase	-0.983107	-2.86636	1.77539	0.00827535
TAF1	P21675	Q8IZX4;P21675	TAF1_HUMAN	Transcription initiation factor TFIID subunit 1	1.00173	4.91937	3.21794	0.000361895
EPHA1	P21709	P21709	EPHA1_HUMAN	Ephrin type-A receptor 1	0.672038	1.62098	0.86618	0.0785454
MDK	P21741	P21741	MK_HUMAN	Midkine	0.481492	2.3178	1.3672	0.0216587
VDAC1	P21796	P21796	VDAC1_HUMAN	Voltage-dependent anion-selective channel protein 1	-0.410736	-2.35546	1.39508	0.0202322
BGN	P21810	P21810	PGS1_HUMAN	Biglycan	0.481308	1.03252	0.486581	0.228201
SDHB	P21912	P21912	SDHB_HUMAN	Succinate dehydrogenase [ubiquinone] iron-sulfur subunit, mitochondrial	-0.461665	-3.49187	2.23621	0.00282716
CD9	P21926	P21926	CD9_HUMAN	CD9 antigen	0.0171673	0.105402	0.0370904	0.894707
BCKDHB	P21953	P21953	ODBB_HUMAN	2-oxoisovalerate dehydrogenase subunit beta, mitochondrial	0.968989	5.74604	3.73008	0.000118728
COMT	P21964	P21964	COMT_HUMAN	Catechol O-methyltransferase	0.323531	4.03858	2.62587	0.00123175
TGM2	P21980	P21980	TGM2_HUMAN	Protein-glutamine gamma-glutamyltransferase 2	0.226888	0.464517	0.185602	0.565331
MMUT	P22033	P22033	MUTA_HUMAN	Methylmalonyl-CoA mutase, mitochondrial	0.444819	2.6214	1.59284	0.0127129
OSBP	P22059	P22059	OSBP1_HUMAN	Oxysterol-binding protein 1	0.221277	3.437	2.19632	0.0030686
PCMT1	P22061	P22061	PIMT_HUMAN	Protein-L-isoaspartate(D-aspartate) O-methyltransferase	0.352562	5.36563	3.49964	0.000190476
FBL	P22087	P22087	FBRL_HUMAN	rRNA 2'-O-methyltransferase fibrillarin	1.95238	10.3839	5.94914	5.60748e-05
GART	P22102	P22102	PUR2_HUMAN	Trifunctional purine biosynthetic protein adenosine-3	0.786792	8.53358	5.17654	2.41935e-05
TNXB	P22105	P22105	TENX_HUMAN	Tenascin-X	-0.207386	-0.52185	0.212442	0.520008
CDH3	P22223	P22223	CADH3_HUMAN	Cadherin-3	0.628224	2.20095	1.28103	0.0268473
PAICS	P22234	P22234	PUR6_HUMAN	Bifunctional phosphoribosylaminoimidazole carboxylase/phosphoribosylaminoimidazole succinocarboxamide synthetase	1.33723	9.67097	5.66592	3.93443e-05
SCP2	P22307	P22307	SCP2_HUMAN	Sterol carrier protein 2	-0.289086	-3.20372	2.02539	0.00452245
UBA1	P22314	P22314	UBA1_HUMAN	Ubiquitin-like modifier-activating enzyme 1	0.254377	2.83511	1.75212	0.00874907
GPX3	P22352	P22352	GPX3_HUMAN	Glutathione peroxidase 3	0.628332	1.28875	0.644929	0.144883
NME2	P22392	O60361;P22392	NDKB_HUMAN	Nucleoside diphosphate kinase B	1.5109	8.48357	5.15386	2.33918e-05
USF1	P22415	Q15853;P22415	USF1_HUMAN	Upstream stimulatory factor 1	1.14868	4.17246	2.71886	0.00101165
FDXR	P22570	P22570	ADRO_HUMAN	NADPH:adrenodoxin oxidoreductase, mitochondrial	-2.00191	-8.7237	5.26183	2.64901e-05
HNRNPA2B1	P22626	P22626	ROA2_HUMAN	Heterogeneous nuclear ribonucleoproteins A2/B1	0.498934	4.42087	2.88861	0.000711434
RFX1	P22670	P22670	RFX1_HUMAN	MHC class II regulatory factor RFX1	-0.106442	-0.71443	0.308652	0.387438
CBL	P22681	P22681	CBL_HUMAN	E3 ubiquitin-protein ligase CBL	-0.126474	-0.368793	0.142686	0.645024
PRKACB	P22694	P22694	KAPCB_HUMAN	cAMP-dependent protein kinase catalytic subunit beta	0.409596	2.51033	1.51011	0.0154157
UQCRC2	P22695	P22695	QCR2_HUMAN	Cytochrome b-c1 complex subunit 2, mitochondrial	0.182873	1.3546	0.68749	0.128465
TGM1	P22735	P22735	TGM1_HUMAN	Protein-glutamine gamma-glutamyltransferase K	1.36078	1.81183	0.999552	0.0550913
FECH	P22830	P22830	HEMH_HUMAN	Ferrochelatase, mitochondrial	1.61108	4.4234	2.89033	0.000702997
CES1	P23141	P23141	EST1_HUMAN	Liver carboxylesterase 1	-2.9266	-6.32244	4.06279	5.9754e-05
FBLN1	P23142	P23142	FBLN1_HUMAN	Fibulin-1	0.153215	0.316239	0.120146	0.692057
TCEA1	P23193	Q15560;P23193	TCEA1_HUMAN	Transcription elongation factor A protein 1	0.528877	5.83032	3.77995	0.000108744
PTGS1	P23219	P23219	PGH1_HUMAN	Prostaglandin G/H synthase 1	2.23454	6.44151	4.12914	5.53506e-05
ITGA6	P23229	P23229	ITA6_HUMAN	Integrin alpha-6	0.059108	0.317526	0.120689	0.69082
SFPQ	P23246	P23246	SFPQ_HUMAN	Splicing factor, proline- and glutamine-rich	0.477034	4.91743	3.21668	0.000361702
TUBG1	P23258	P23258;Q9NRH3	TBG1_HUMAN	Tubulin gamma-1 chain	0.0655976	0.705854	0.304174	0.392766
PPIB	P23284	P23284	PPIB_HUMAN	Peptidyl-prolyl cis-trans isomerase B	0.726201	5.75384	3.73472	0.000119064
S100A1	P23297	P23297	S10A1_HUMAN	Protein S100-A1	3.19057	6.09678	3.93484	7.79854e-05
ME2	P23368	P23368	MAOM_HUMAN	NAD-dependent malic enzyme, mitochondrial	-0.158695	-2.65072	1.6147	0.0121191
GLDC	P23378	P23378	GCSP_HUMAN	Glycine dehydrogenase (decarboxylating), mitochondrial	1.27779	2.62223	1.59346	0.0127133
WARS1	P23381	P23381	SYWC_HUMAN	Tryptophan--tRNA ligase, cytoplasmic	-0.021261	-0.28025	0.105132	0.725563
RPS3	P23396	P23396	RS3_HUMAN	Small ribosomal subunit protein uS3	1.14507	11.1056	6.21958	8.10811e-05
RPS6KB1	P23443	P23443;Q9UBS0	KS6B1_HUMAN	Ribosomal protein S6 kinase beta-1	0.98683	3.765	2.43277	0.00177158
JAK1	P23458	P23458	JAK1_HUMAN	Tyrosine-protein kinase JAK1	-0.0548572	-0.466591	0.186558	0.563487
PTPRG	P23470	P23470	PTPRG_HUMAN	Receptor-type tyrosine-protein phosphatase gamma	1.03227	2.64436	1.60995	0.0122717
SP100	P23497	P23497;Q9H930	SP100_HUMAN	Nuclear autoantigen Sp-100	0.514552	4.2355	2.76229	0.000926726
AHCY	P23526	P23526	SAHH_HUMAN	Adenosylhomocysteinase	1.41666	8.50245	5.16244	2.3622e-05
CFL1	P23528	Q9Y281;P23528	COF1_HUMAN	Cofilin-1	0.722983	8.78803	5.29036	2.71493e-05
EIF4B	P23588	P23588	IF4B_HUMAN	Eukaryotic translation initiation factor 4B	0.271441	6.32943	4.06671	5.99119e-05
F8A3	P23610	P23610	HAP40_HUMAN	40-kDa huntingtin-associated protein	-0.211123	-2.81292	1.73559	0.00908648
ATP2B4	P23634	P23634;P20020	AT2B4_HUMAN	Plasma membrane calcium-transporting ATPase 4	0.0332064	0.275481	0.103168	0.730508
DGKA	P23743	P23743	DGKA_HUMAN	Diacylglycerol kinase alpha	1.20162	2.49216	1.49659	0.0158742
CPT2	P23786	P23786	CPT2_HUMAN	Carnitine O-palmitoyltransferase 2, mitochondrial	-0.347295	-2.7727	1.70563	0.00967648
DTYMK	P23919	P23919	KTHY_HUMAN	Thymidylate kinase	0.463901	7.34508	4.60769	1.51324e-05
RRM1	P23921	P23921	RIR1_HUMAN	Ribonucleoside-diphosphate reductase large subunit	0.185018	1.35803	0.689725	0.127727
PRTN3	P24158	P24158	PRTN3_HUMAN	Myeloblastin	-0.333088	-0.717066	0.310032	0.386156
CHM	P24386	P24386	RAE1_HUMAN	Rab proteins geranylgeranyltransferase component A 1	0.253171	2.09502	1.20344	0.0327861
EEF1B2	P24534	P24534	EF1B_HUMAN	Elongation factor 1-beta	0.655099	4.98373	3.25933	0.000343105
ATP5PB	P24539	P24539	AT5F1_HUMAN	ATP synthase F(0) complex subunit B1, mitochondrial	-0.220917	-1.20261	0.590359	0.168393
TBXAS1	P24557	P24557	THAS_HUMAN	Thromboxane-A synthase	0.426581	1.30431	0.654923	0.140735
ACP1	P24666	P24666	PPAC_HUMAN	Low molecular weight phosphotyrosine protein phosphatase	0.526726	3.51724	2.25461	0.00269011
ACAT1	P24752	P24752	THIL_HUMAN	Acetyl-CoA acetyltransferase, mitochondrial	-0.325132	-1.40952	0.723509	0.116715
TNC	P24821	P24821	TENA_HUMAN	Tenascin	-0.942727	-1.90689	1.0673	0.0463469
MYL9	P24844	P24844	MYL9_HUMAN	Myosin regulatory light polypeptide 9	0.430365	3.73394	2.4106	0.00186355
POLR2A	P24928	P24928	RPB1_HUMAN	DNA-directed RNA polymerase II subunit RPB1	0.28974	4.4856	2.93224	0.000644743
CDK2	P24941	P24941;Q00526	CDK2_HUMAN	Cyclin-dependent kinase 2	1.04379	6.46204	4.1405	5.5607e-05
GRK2	P25098	P25098	ARBK1_HUMAN	Beta-adrenergic receptor kinase 1	-0.258005	-1.99797	1.1329	0.0391588
MCM3	P25205	P25205	MCM3_HUMAN	DNA replication licensing factor MCM3	1.01419	3.95359	2.56631	0.00137835
AZGP1	P25311	P25311	ZA2G_HUMAN	Zinc-alpha-2-glycoprotein	0.403332	0.877488	0.397059	0.297349
MPST	P25325	P25325	THTM_HUMAN	3-mercaptopyruvate sulfurtransferase	1.06663	5.88807	3.81387	0.000108108
RPS12	P25398	P25398	RS12_HUMAN	Small ribosomal subunit protein eS12	1.19284	9.27616	5.50157	3.30579e-05
BRD2	P25440	P25440	BRD2_HUMAN	Bromodomain-containing protein 2	0.365137	3.43128	2.19215	0.00310121
YY1	P25490	P25490	TYY1_HUMAN	Transcriptional repressor protein YY1	1.10143	6.95145	4.40448	3.05677e-05
DNAJB1	P25685	Q9UDY4;P25685	DNJB1_HUMAN	DnaJ homolog subfamily B member 1	0.309377	3.33142	2.11921	0.00370584
DNAJB2	P25686	P25686	DNJB2_HUMAN	DnaJ homolog subfamily B member 2	-0.847334	-5.5603	3.61867	0.000134742
ATP5F1A	P25705	P25705	ATPA_HUMAN	ATP synthase subunit alpha, mitochondrial	-0.253982	-1.54045	0.811142	0.0915202
CTSS	P25774	P25774	CATS_HUMAN	Cathepsin S	-1.54793	-2.60613	1.58146	0.0130926
PSMA1	P25786	P25786	PSA1_HUMAN	Proteasome subunit alpha type-1	0.238924	4.07387	2.65048	0.00116176
PSMA2	P25787	P25787	PSA2_HUMAN	Proteasome subunit alpha type-2	0.344302	4.53844	2.96767	0.000603774
PSMA3	P25788	P25788	PSA3_HUMAN	Proteasome subunit alpha type-3	0.280732	2.83234	1.75006	0.00878196
PSMA4	P25789	P25789	PSA4_HUMAN	Proteasome subunit alpha type-4	0.209376	2.51811	1.5159	0.0152025
ITGA3	P26006	P26006	ITA3_HUMAN	Integrin alpha-3	0.31251	2.79513	1.72234	0.00932055
ITGB8	P26012	P26012	ITB8_HUMAN	Integrin beta-8	-0.442962	-1.27082	0.633464	0.149235
MSN	P26038	P26038	MOES_HUMAN	Moesin	0.926676	5.44893	3.55086	0.000159797
PTPN3	P26045	P26045	PTN3_HUMAN	Tyrosine-protein phosphatase non-receptor type 3	-0.246929	-1.9157	1.07362	0.0456604
DDX6	P26196	P26196	DDX6_HUMAN	Probable ATP-dependent RNA helicase DDX6	0.48118	7.04324	4.45257	2.26757e-05
CTNNA2	P26232	P26232	CTNA2_HUMAN	Catenin alpha-2	0.890798	3.28956	2.08851	0.00395981
DNMT1	P26358	P26358	DNMT1_HUMAN	DNA (cytosine-5)-methyltransferase 1	-0.111217	-1.39903	0.716589	0.118728
U2AF2	P26368	P26368	U2AF2_HUMAN	Splicing factor U2AF 65 kDa subunit	0.667353	5.89855	3.82001	0.000108597
RPL13	P26373	P26373	RL13_HUMAN	Large ribosomal subunit protein eL13	1.21928	8.50113	5.16184	2.35756e-05
CHML	P26374	P26374	RAE2_HUMAN	Rab proteins geranylgeranyltransferase component A 2	0	NaN	NaN	1
IVD	P26440	P26440	IVD_HUMAN	Isovaleryl-CoA dehydrogenase, mitochondrial	0.430697	4.35787	2.84591	0.000792202
S100A4	P26447	P26447	S10A4_HUMAN	Protein S100-A4	0.305498	0.971655	0.450828	0.253332
MGAT1	P26572	P26572	MGAT1_HUMAN	Alpha-1,3-mannosyl-glycoprotein 2-beta-N-acetylglucosaminyltransferase	-0.263813	-0.402258	0.157417	0.616576
HMGB2	P26583	P26583	HMGB2_HUMAN	High mobility group protein B2	-0.799964	-3.49348	2.23738	0.0028199
PTBP1	P26599	P26599	PTBP1_HUMAN	Polypyrimidine tract-binding protein 1	0.607372	4.57788	2.994	0.000566794
TARS1	P26639	P26639;A2RTX5	SYTC_HUMAN	Threonine--tRNA ligase 1, cytoplasmic	0.257572	3.07829	1.93276	0.0057122
VARS1	P26640	P26640	SYVC_HUMAN	Valine--tRNA ligase	0.484483	7.03607	4.44883	2.25989e-05
EEF1G	P26641	P26641	EF1G_HUMAN	Elongation factor 1-gamma	0.442441	7.81795	4.84172	1.80723e-05
FKBP2	P26885	P26885	FKBP2_HUMAN	Peptidyl-prolyl cis-trans isomerase FKBP2	0.283932	1.8559	1.03087	0.0508193
STOM	P27105	P27105	STOM_HUMAN	Stomatin	0.134353	0.317566	0.120706	0.690895
AK4	P27144	P27144;A0A8I5KW96	KAD4_HUMAN	Adenylate kinase 4, mitochondrial	1.04411	4.52888	2.96127	0.000610615
PON1	P27169	P27169	PON1_HUMAN	Serum paraoxonase/arylesterase 1	0.614106	1.30969	0.658386	0.139298
ANXA13	P27216	P27216	ANX13_HUMAN	Annexin A13	-3.37866	-4.68025	3.06189	0.00045776
MAOB	P27338	P27338	AOFB_HUMAN	Amine oxidase [flavin-containing] B	-1.9101	-10.7449	6.08635	6.66667e-05
YWHAQ	P27348	P27348	1433T_HUMAN	14-3-3 protein theta	0.13605	0.7275	0.31551	0.379949
MAPK3	P27361	P27361;P31152;Q16659;P28482	MK03_HUMAN	Mitogen-activated protein kinase 3	0.398886	4.77817	3.12622	0.000414497
MARK3	P27448	P27448	MARK3_HUMAN	MAP/microtubule affinity-regulating kinase 3	-0.513601	-1.70135	0.921869	0.0678382
DPP4	P27487	P27487	DPP4_HUMAN	Dipeptidyl peptidase 4	2.33088	2.7942	1.72165	0.00932694
ARNT	P27540	P27540	ARNT_HUMAN	Aryl hydrocarbon receptor nuclear translocator	0.635735	3.95034	2.56403	0.00137568
RPL10	P27635	P27635	RL10_HUMAN	Large ribosomal subunit protein uL16	1.14277	8.76959	5.2822	2.69663e-05
RPA1	P27694	P27694	RFA1_HUMAN	Replication protein A 70 kDa DNA-binding subunit	0.7657	8.17506	5.0116	2.02361e-05
APEX1	P27695	P27695	APEX1_HUMAN	DNA-(apurinic or apyrimidinic site) endonuclease	1.62426	10.9361	6.15745	7.22892e-05
DCK	P27707	P27707	DCK_HUMAN	Deoxycytidine kinase	0.0361796	0.341228	0.130772	0.669565
CAD	P27708	P27708	PYR1_HUMAN	CAD protein	1.90084	10.7282	6.08009	6.59341e-05
CALR	P27797	P27797	CALR_HUMAN	Calreticulin	0.275931	1.39558	0.71432	0.119436
MAP4	P27816	P27816	MAP4_HUMAN	Microtubule-associated protein 4	0.136445	1.54412	0.813637	0.0909845
CANX	P27824	P27824	CALX_HUMAN	Calnexin	0.420338	4.78653	3.13168	0.000414572
PIK3R1	P27986	P27986	P85A_HUMAN	Phosphatidylinositol 3-kinase regulatory subunit alpha	0.606416	2.17645	1.26303	0.028124
ITPKB	P27987	P27987	IP3KB_HUMAN	Inositol-trisphosphate 3-kinase B	0.584332	2.12933	1.2285	0.0307404
PSMB8	P28062	P28062	PSB8_HUMAN	Proteasome subunit beta type-8	0.328267	7.5276	4.69929	1.6129e-05
PSMB9	P28065	P28065	PSB9_HUMAN	Proteasome subunit beta type-9	-0.239045	-1.78949	0.983748	0.0573473
PSMA5	P28066	P28066	PSA5_HUMAN	Proteasome subunit alpha type-5	0.10832	1.54603	0.814932	0.0906238
HLA-DMB	P28068	P28068	DMB_HUMAN	HLA class II histocompatibility antigen, DM beta chain	0.783145	5.27531	3.44363	0.000232614
PSMB4	P28070	P28070	PSB4_HUMAN	Proteasome subunit beta type-4	0.302981	3.05838	1.91801	0.00590027
PSMB6	P28072	P28072	PSB6_HUMAN	Proteasome subunit beta type-6	0.663959	5.02592	3.28633	0.000325812
PSMB5	P28074	P28074	PSB5_HUMAN	Proteasome subunit beta type-5	0.180429	2.08424	1.19557	0.0333618
GSTM2	P28161	Q03013;P09488;P28161	GSTM2_HUMAN	Glutathione S-transferase Mu 2	0.757419	2.91459	1.81127	0.00757729
ABCD3	P28288	P28288	ABCD3_HUMAN	ATP-binding cassette sub-family D member 3	-1.38303	-10.0026	5.79977	4.54545e-05
TMOD1	P28289	P28289	TMOD1_HUMAN	Tropomodulin-1	0.497879	4.49366	2.93766	0.000642227
ITPRID2	P28290	P28290	ITPI2_HUMAN	Protein ITPRID2	-0.918026	-8.229	5.03677	2.07612e-05
NDUFS1	P28331	P28331	NDUS1_HUMAN	NADH-ubiquinone oxidoreductase 75 kDa subunit, mitochondrial	0.183109	2.74959	1.6884	0.0101076
POLD1	P28340	P28340	DPOD1_HUMAN	DNA polymerase delta catalytic subunit	0.115266	1.53146	0.80505	0.0929787
TEAD1	P28347	Q15562;Q15561;Q99594;P28347	TEAD1_HUMAN	Transcriptional enhancer factor TEF-1	1.08842	2.68553	1.64065	0.0113471
SMARCA1	P28370	P28370	SMCA1_HUMAN	Probable global transcription activator SNF2L1	0.569433	8.86016	5.32215	2.85036e-05
MAPK1	P28482	P28482	MK01_HUMAN	Mitogen-activated protein kinase 1	0.749043	16.7631	7.92206	0
GCA	P28676	P28676	GRAN_HUMAN	Grancalcin	0.513655	5.26004	3.43411	0.00023445
RXRB	P28702	P28702;P48443;P19793	RXRB_HUMAN	Retinoic acid receptor RXR-beta	0.542467	7.4804	4.67576	1.5894e-05
ERCC5	P28715	P28715	ERCC5_HUMAN	DNA excision repair protein ERCC-5	0.559427	1.39442	0.713555	0.119574
GRN	P28799	P28799	GRN_HUMAN	Progranulin	0.223564	0.550297	0.226072	0.498562
PTPRM	P28827	P28827	PTPRM_HUMAN	Receptor-type tyrosine-protein phosphatase mu	0.703644	3.27675	2.07912	0.00404262
LAP3	P28838	P28838	AMPL_HUMAN	Cytosol aminopeptidase	-0.0554066	-0.467694	0.187067	0.563007
CD38	P28907	P28907	CD38_HUMAN	ADP-ribosyl cyclase/cyclic ADP-ribose hydrolase 1	-2.28824	-6.28298	4.04063	6.60295e-05
GTF2E1	P29083	P29083	T2EA_HUMAN	General transcription factor IIE subunit 1	0.209714	1.40662	0.721595	0.117348
GTF2E2	P29084	P29084	T2EB_HUMAN	Transcription initiation factor IIE subunit beta	0.151954	0.635742	0.268234	0.43846
TPP2	P29144	P29144	TPP2_HUMAN	Tripeptidyl-peptidase 2	-0.574168	-5.94698	3.84828	9.50192e-05
IMPA1	P29218	P29218	IMPA1_HUMAN	Inositol monophosphatase 1	-0.264657	-1.41745	0.728742	0.115025
EPHB2	P29323	P29323;Q15375	EPHB2_HUMAN	Ephrin type-B receptor 2	-0.209598	-1.9698	1.11255	0.0413139
PTPN6	P29350	P29350	PTN6_HUMAN	Tyrosine-protein phosphatase non-receptor type 6	0.115749	1.99017	1.12726	0.0397359
SHC1	P29353	P29353	SHC1_HUMAN	SHC-transforming protein 1	0.185508	1.40385	0.719768	0.117787
MPG	P29372	P29372	3MG_HUMAN	DNA-3-methyladenine glycosylase	0.392729	4.34395	2.83644	0.000801762
CRABP2	P29373	P29373	RABP2_HUMAN	Cellular retinoic acid-binding protein 2	0.62423	1.56112	0.825191	0.0879644
ARID4A	P29374	Q4LE39;P29374	ARI4A_HUMAN	AT-rich interactive domain-containing protein 4A	0.584015	5.60323	3.64461	0.000137281
KDM5A	P29375	P29375	KDM5A_HUMAN	Lysine-specific demethylase 5A	1.58753	3.26584	2.0711	0.00409662
COL4A5	P29400	P29400	CO4A5_HUMAN	Collagen alpha-5(IV) chain	1.33818	1.54346	0.813184	0.0910748
TKT	P29401	P29401	TKT_HUMAN	Transketolase	-0.0266473	-0.169137	0.0609498	0.833768
CASP1	P29466	P29466	CASP1_HUMAN	Caspase-1	0.47445	4.36179	2.84857	0.000784035
SERPINB3	P29508	P29508	SPB3_HUMAN	Serpin B3	0.389253	0.539457	0.220854	0.506886
RBMS1	P29558	P29558;Q6XE24	RBMS1_HUMAN	RNA-binding motif, single-stranded-interacting protein 1	0.720387	3.09937	1.94835	0.00547871
PML	P29590	P29590	PML_HUMAN	Protein PML	1.28456	13.9662	7.15923	0
SERPINA4	P29622	P29622	KAIN_HUMAN	Kallistatin	0.367409	0.441507	0.175068	0.584186
EEF1D	P29692	P29692	EF1D_HUMAN	Elongation factor 1-delta	0.499374	9.17731	5.45953	3.19149e-05
OAS2	P29728	P29728	OAS2_HUMAN	2'-5'-oligoadenylate synthase 2	-1.81385	-2.62204	1.59332	0.0127109
MARCKS	P29966	P29966	MARCS_HUMAN	Myristoylated alanine-rich C-kinase substrate	-0.897999	-3.91099	2.53632	0.00146876
GNA11	P29992	P29992	GNA11_HUMAN	Guanine nucleotide-binding protein subunit alpha-11	-0.67687	-6.64629	4.2414	4.73373e-05
ALDH4A1	P30038	P30038	AL4A1_HUMAN	Delta-1-pyrroline-5-carboxylate dehydrogenase, mitochondrial	1.12021	6.10596	3.94011	7.82396e-05
PBLD	P30039	P30039	PBLD_HUMAN	Phenazine biosynthesis-like domain-containing protein	-1.95392	-9.82572	5.72884	4.1958e-05
ERP29	P30040	P30040	ERP29_HUMAN	Endoplasmic reticulum resident protein 29	-0.245694	-1.17803	0.575025	0.176072
PRDX6	P30041	P30041	PRDX6_HUMAN	Peroxiredoxin-6	1.01048	7.55575	4.71327	1.62602e-05
BLVRB	P30043	P30043	BLVRB_HUMAN	Flavin reductase (NADPH)	0.593903	6.11553	3.94559	7.85597e-05
PRDX5	P30044	P30044	PRDX5_HUMAN	Peroxiredoxin-5, mitochondrial	-0.94536	-13.6692	7.07015	0
DDT	P30046	A6NHG4;P30046	DOPD_HUMAN	D-dopachrome decarboxylase	0.910306	6.92626	4.39121	3.01724e-05
PRDX3	P30048	P30048	PRDX3_HUMAN	Thioredoxin-dependent peroxide reductase, mitochondrial	0.0470634	0.353969	0.136254	0.658532
ATP5F1D	P30049	P30049	ATPD_HUMAN	ATP synthase subunit delta, mitochondrial	-0.193521	-1.20677	0.59296	0.16725
RPL12	P30050	P30050	RL12_HUMAN	Large ribosomal subunit protein uL11	1.11202	9.05031	5.40499	3.00752e-05
ECHS1	P30084	P30084	ECHM_HUMAN	Enoyl-CoA hydratase, mitochondrial	0.800389	3.36917	2.14683	0.0034717
CMPK1	P30085	P30085	KCY_HUMAN	UMP-CMP kinase	0.231874	2.59375	1.57223	0.0134413
PEBP1	P30086	P30086	PEBP1_HUMAN	Phosphatidylethanolamine-binding protein 1	0.414684	4.53174	2.96318	0.000611765
PDIA3	P30101	P30101	PDIA3_HUMAN	Protein disulfide-isomerase A3	0.357661	2.80243	1.72778	0.00921085
PPP2R1A	P30153	P30153	2AAA_HUMAN	Serine/threonine-protein phosphatase 2A 65 kDa regulatory subunit A alpha isoform	0.189302	2.47218	1.48173	0.0164458
CDC27	P30260	P30260	CDC27_HUMAN	Cell division cycle protein 27 homolog	0.670117	1.72291	0.936933	0.0652495
FCER1G	P30273	P30273	FCERG_HUMAN	High affinity immunoglobulin epsilon receptor subunit gamma	0.883693	3.01702	1.88736	0.00633393
PPIF	P30405	P30405	PPIF_HUMAN	Peptidyl-prolyl cis-trans isomerase F, mitochondrial	0.202732	0.423589	0.16696	0.597986
NKTR	P30414	P30414	NKTR_HUMAN	NK-tumor recognition protein	1.68357	2.40049	1.42847	0.0188177
NMT1	P30419	P30419	NMT1_HUMAN	Glycylpeptide N-tetradecanoyltransferase 1	1.32897	11.0654	6.2049	7.94702e-05
HMOX2	P30519	P30519	HMOX2_HUMAN	Heme oxygenase 2	0.347293	4.59898	3.00804	0.000547893
ADSS2	P30520	P30520	PURA2_HUMAN	Adenylosuccinate synthetase isozyme 2	-0.20826	-3.30205	2.09768	0.00388029
LRPAP1	P30533	P30533	AMRP_HUMAN	Alpha-2-macroglobulin receptor-associated protein	0.307856	3.56164	2.28675	0.00249146
TSPO	P30536	P30536	TSPO_HUMAN	Translocator protein	0.392435	2.30378	1.35684	0.0222222
ADSL	P30566	P30566	PUR8_HUMAN	Adenylosuccinate lyase	0.633655	4.93148	3.22575	0.000363054
CLIP1	P30622	P30622	CLIP1_HUMAN	CAP-Gly domain-containing linker protein 1	-0.69454	-8.38834	5.11038	2.24299e-05
SRI	P30626	P30626	SORCN_HUMAN	Sorcin	-1.20495	-8.36448	5.09943	2.21402e-05
GSTT1	P30711	P30711	GSTT1_HUMAN	Glutathione S-transferase theta-1	0.412697	1.91631	1.07406	0.0456273
SERPINB1	P30740	P30740	ILEU_HUMAN	Leukocyte elastase inhibitor	-0.792681	-6.48841	4.15505	5.60224e-05
ALDH1B1	P30837	P30837	AL1B1_HUMAN	Aldehyde dehydrogenase X, mitochondrial	2.03272	7.1516	4.50879	2.36128e-05
ALDH3A1	P30838	P30838	AL3A1_HUMAN	Aldehyde dehydrogenase, dimeric NADP-preferring	0.852854	3.02495	1.89324	0.00627147
POLR2B	P30876	P30876	RPB2_HUMAN	DNA-directed RNA polymerase II subunit RPB2	0.456786	7.0339	4.4477	2.25479e-05
LCN1	P31025	P31025	LCN1_HUMAN	Lipocalin-1	-0.406727	-0.476548	0.191164	0.555853
SDHA	P31040	P31040	SDHA_HUMAN	Succinate dehydrogenase [ubiquinone] flavoprotein subunit, mitochondrial	-0.396717	-3.67095	2.36549	0.00205308
CORO1A	P31146	P31146	COR1A_HUMAN	Coronin-1A	0.272212	0.795449	0.351813	0.34026
GDI1	P31150	P31150	GDIA_HUMAN	Rab GDP dissociation inhibitor alpha	-0.691673	-4.76261	3.11604	0.000419241
S100A7	P31151	P31151;Q86SG5	S10A7_HUMAN	Protein S100-A7	-0.471894	-0.727627	0.315577	0.379923
MAT2A	P31153	P31153	METK2_HUMAN	S-adenosylmethionine synthase isoform type-2	0.898089	7.09562	4.47982	2.32288e-05
PRKAR1B	P31321	P31321	KAP1_HUMAN	cAMP-dependent protein kinase type I-beta regulatory subunit	0.356019	0.966521	0.447848	0.255219
PRKAR2B	P31323	P31323	KAP3_HUMAN	cAMP-dependent protein kinase type II-beta regulatory subunit	0.00575348	0.0252353	0.00861276	0.974318
SDC4	P31431	P31431	SDC4_HUMAN	Syndecan-4	-0.681808	-1.88124	1.04895	0.0484699
TIA1	P31483	P31483	TIA1_HUMAN	Cytotoxic granule associated RNA binding protein TIA1	0.544214	4.63074	3.02913	0.000523002
FMO4	P31512	P31512	FMO4_HUMAN	Dimethylaniline monooxygenase [N-oxide-forming] 4	-1.67725	-6.41025	4.1118	5.48948e-05
DNAJA1	P31689	P31689	DNJA1_HUMAN	DnaJ homolog subfamily A member 1	-0.539081	-5.79939	3.7617	0.000110545
AKT1	P31749	P31749	AKT1_HUMAN	RAC-alpha serine/threonine-protein kinase	0.649088	4.81663	3.15132	0.000400415
AKT2	P31751	P31751	AKT2_HUMAN	RAC-beta serine/threonine-protein kinase	0.453082	4.53266	2.9638	0.000610169
UQCRC1	P31930	P31930	QCR1_HUMAN	Cytochrome b-c1 complex subunit 1, mitochondrial	0.221798	1.56139	0.825373	0.0879561
HIBADH	P31937	P31937	3HIDH_HUMAN	3-hydroxyisobutyrate dehydrogenase, mitochondrial	-0.495165	-2.40995	1.43549	0.0184478
ATIC	P31939	P31939	PUR9_HUMAN	Bifunctional purine biosynthesis protein ATIC	0.991685	10.9613	6.16673	7.40741e-05
HNRNPH3	P31942	P31942	HNRH3_HUMAN	Heterogeneous nuclear ribonucleoprotein H3	0.475107	2.69807	1.65	0.0111057
HNRNPH1	P31943	P31943	HNRH1_HUMAN	Heterogeneous nuclear ribonucleoprotein H	0.972279	6.94484	4.401	3.05011e-05
CASP14	P31944	P31944	CASPE_HUMAN	Caspase-14	-0.222968	-0.482281	0.193828	0.551188
YWHAB	P31946	P31946	1433B_HUMAN	14-3-3 protein beta/alpha	0.569155	4.31767	2.81854	0.000802088
SFN	P31947	P31947	1433S_HUMAN	14-3-3 protein sigma	0.325116	2.55869	1.54611	0.0141949
STIP1	P31948	P31948	STIP1_HUMAN	Stress-induced-phosphoprotein 1	-0.20888	-2.90761	1.80608	0.00770134
S100A11	P31949	P31949	S10AB_HUMAN	Protein S100-A11	-0.744021	-4.11936	2.6821	0.00108898
L1CAM	P32004	P32004	L1CAM_HUMAN	Neural cell adhesion molecule L1	-2.19292	-4.4639	2.91765	0.000667586
INPP5B	P32019	P32019	I5P2_HUMAN	Type II inositol 1,4,5-trisphosphate 5-phosphatase	0.383921	0.917588	0.419722	0.277831
PRDX2	P32119	P32119	PRDX2_HUMAN	Peroxiredoxin-2	1.09268	9.55228	5.6171	3.68098e-05
ARRB2	P32121	P32121	ARRB2_HUMAN	Beta-arrestin-2	1.37106	5.39122	3.51542	0.000174782
GK	P32189	P32189;Q14409	GLPK_HUMAN	Glycerol kinase	-1.91408	-8.94728	5.36028	2.90557e-05
DCTD	P32321	P32321	DCTD_HUMAN	Deoxycytidylate deaminase	1.00645	7.66238	4.7659	1.67832e-05
PYCR1	P32322	P32322	P5CR1_HUMAN	Pyrroline-5-carboxylate reductase 1, mitochondrial	1.47816	5.94838	3.8491	9.5092e-05
SLC8A1	P32418	P32418	NAC1_HUMAN	Sodium/calcium exchanger 1	2.61179	5.40799	3.52574	0.000163419
GBP1	P32455	P32455;Q9H0R5	GBP1_HUMAN	Guanylate-binding protein 1	0.38945	4.482	2.92982	0.00064695
GBP2	P32456	P32456	GBP2_HUMAN	Guanylate-binding protein 2	0.650477	5.23033	3.41554	0.000245428
ELF1	P32519	P32519	ELF1_HUMAN	ETS-related transcription factor Elf-1	0.62712	5.87414	3.80571	0.000107543
STX2	P32856	P32856	STX2_HUMAN	Syntaxin-2	-1.19974	-4.93676	3.22915	0.000363831
CTH	P32929	P32929	CGL_HUMAN	Cystathionine gamma-lyase	0.538423	2.54685	1.5373	0.0144224
RPL9P9	P32969	P32969	RL9_HUMAN	Large ribosomal subunit protein uL6	1.15612	9.78811	5.71362	4.12371e-05
ACSL1	P33121	P33121	ACSL1_HUMAN	Long-chain-fatty-acid--CoA ligase 1	0.530704	3.1258	1.9679	0.00522143
KIF5B	P33176	O60282;P33176;Q12840	KINH_HUMAN	Kinesin-1 heavy chain	-0.318373	-3.81008	2.46487	0.00168343
CSTF2	P33240	Q9H0L4;P33240	CSTF2_HUMAN	Cleavage stimulation factor subunit 2	0.245058	2.30653	1.35887	0.0221263
LSP1	P33241	P33241	LSP1_HUMAN	Lymphocyte-specific protein 1	0.188903	0.78723	0.347364	0.344601
DUT	P33316	P33316	DUT_HUMAN	Deoxyuridine 5'-triphosphate nucleotidohydrolase, mitochondrial	0.966672	5.51488	3.59111	0.000140625
ABCC1	P33527	P33527	MRP1_HUMAN	Multidrug resistance-associated protein 1	-0.518853	-5.43226	3.54065	0.000161616
CKS2	P33552	P33552	CKS2_HUMAN	Cyclin-dependent kinases regulatory subunit 2	0	NaN	NaN	1
TTK	P33981	P33981	TTK_HUMAN	Dual specificity protein kinase TTK	0	NaN	NaN	1
MCM4	P33991	P33991	MCM4_HUMAN	DNA replication licensing factor MCM4	0.95904	1.57679	0.835874	0.0854834
MCM5	P33992	P33992	MCM5_HUMAN	DNA replication licensing factor MCM5	1.39413	3.75916	2.4286	0.00178967
MCM7	P33993	P33993	MCM7_HUMAN	DNA replication licensing factor MCM7	1.23812	4.29119	2.80046	0.000833118
GALNS	P34059	P34059	GALNS_HUMAN	N-acetylgalactosamine-6-sulfatase	-0.201753	-1.3314	0.672415	0.133926
SHMT1	P34896	P34896	GLYC_HUMAN	Serine hydroxymethyltransferase, cytosolic	1.99757	6.11555	3.9456	7.86241e-05
SHMT2	P34897	P34897	GLYM_HUMAN	Serine hydroxymethyltransferase, mitochondrial	0.337619	1.61166	0.859765	0.0799666
EPHX2	P34913	P34913	HYES_HUMAN	Bifunctional epoxide hydrolase 2	0.00468326	0.0413446	0.0141987	0.957961
HSPA4	P34932	P34932	HSP74_HUMAN	Heat shock 70 kDa protein 4	0.0792015	1.88947	1.05483	0.047777
MPI	P34949	P34949	MPI_HUMAN	Mannose-6-phosphate isomerase	1.19474	8.7274	5.26348	2.65487e-05
GPC1	P35052	P35052	GPC1_HUMAN	Glypican-1	0.658439	2.62568	1.59603	0.0126479
PFN2	P35080	P35080	PROF2_HUMAN	Profilin-2	-0.275561	-2.80716	1.7313	0.00915676
CA8	P35219	P35219	CAH8_HUMAN	Carbonic anhydrase-related protein	0.706217	2.72433	1.66957	0.0105912
CTNNA1	P35221	P35221;P26232	CTNA1_HUMAN	Catenin alpha-1	0.139805	1.16569	0.567366	0.179904
CTNNB1	P35222	P35222	CTNB1_HUMAN	Catenin beta-1	0.322144	2.5064	1.50719	0.0155056
BMI1	P35226	P35226	BMI1_HUMAN	Polycomb complex protein BMI-1	1.15922	2.29048	1.34701	0.0227761
PHB1	P35232	P35232	PHB1_HUMAN	Prohibitin 1	0.100698	0.762205	0.333917	0.358652
SERPINB6	P35237	P35237;P50452	SPB6_HUMAN	Serpin B6	-0.900862	-4.81624	3.15107	0.000400207
NF2	P35240	P35240	MERL_HUMAN	Merlin	0.470031	2.71047	1.65924	0.0108603
RDX	P35241	P35241	RADI_HUMAN	Radixin	0.0859903	0.782264	0.344684	0.347587
RPA3	P35244	P35244	RFA3_HUMAN	Replication protein A 14 kDa subunit	0.741521	9.40978	5.55782	3.53982e-05
RFC4	P35249	P35249	RFC4_HUMAN	Replication factor C subunit 4	0.800995	16.1839	7.77433	0
RFC2	P35250	P35250	RFC2_HUMAN	Replication factor C subunit 2	0.621943	7.26762	4.56832	2.46305e-05
RFC1	P35251	P35251	RFC1_HUMAN	Replication factor C subunit 1	0.78023	7.22945	4.54881	2.42718e-05
RPL22	P35268	P35268	RL22_HUMAN	Large ribosomal subunit protein eL22	1.13876	9.47486	5.58499	3.58209e-05
GTF2F1	P35269	P35269	T2FA_HUMAN	General transcription factor IIF subunit 1	0.447805	5.31385	3.46759	0.000218182
SPR	P35270	P35270	SPRE_HUMAN	Sepiapterin reductase	-1.1233	-7.4892	4.68015	1.59574e-05
IDUA	P35475	P35475	IDUA_HUMAN	Alpha-L-iduronidase	0.272338	1.64318	0.881487	0.0754967
UGT1A3	P35503	P35503	UD13_HUMAN	UDP-glucuronosyltransferase 1A3	0.579231	2.90431	1.80363	0.00773171
CBS	P35520	P35520	CBS_HUMAN	Cystathionine beta-synthase	0.173638	0.392969	0.153299	0.624621
SAA4	P35542	P35542	SAA4_HUMAN	Serum amyloid A-4 protein	0.203017	0.627082	0.263878	0.443699
FBN1	P35555	P35555	FBN1_HUMAN	Fibrillin-1	0.400533	0.820204	0.365305	0.326932
IRS1	P35568	P35568	IRS1_HUMAN	Insulin receptor substrate 1	0.547719	3.01625	1.88678	0.00634041
AGL	P35573	P35573	GDE_HUMAN	Glycogen debranching enzyme	-0.316948	-2.57383	1.55739	0.0139214
MYH9	P35579	P35579	MYH9_HUMAN	Myosin-9	0.869568	9.93787	5.77393	4.41176e-05
MYH10	P35580	P35580	MYH10_HUMAN	Myosin-10	0.758034	7.99351	4.92596	1.92308e-05
COPB2	P35606	P35606	COPB2_HUMAN	Coatomer subunit beta'	0.145869	2.09554	1.20381	0.0327571
ACTN2	P35609	P35609	ACTN2_HUMAN	Alpha-actinin-2	0.0998976	0.67762	0.289557	0.410955
SOAT1	P35610	P35610	SOAT1_HUMAN	Sterol O-acyltransferase 1	0.894876	3.47165	2.22153	0.0029045
ADD1	P35611	P35611	ADDA_HUMAN	Alpha-adducin	0.297232	3.24055	2.05251	0.00429303
ADD2	P35612	P35612	ADDB_HUMAN	Beta-adducin	1.44296	3.26928	2.07363	0.00407863
BSG	P35613	P35613	BASI_HUMAN	Basigin	0.639175	2.43766	1.45607	0.0175366
FUS	P35637	P35637	FUS_HUMAN	RNA-binding protein FUS	1.31022	9.62262	5.6461	3.79747e-05
NUP214	P35658	P35658	NU214_HUMAN	Nuclear pore complex protein Nup214	0.217746	2.91335	1.81035	0.00759255
DEK	P35659	P35659	DEK_HUMAN	Protein DEK	0.680727	6.14819	3.96425	7.64755e-05
MYH11	P35749	P35749	MYH11_HUMAN	Myosin-11	-0.57781	-1.02031	0.479348	0.232843
GLRX	P35754	P35754	GLRX1_HUMAN	Glutaredoxin-1	0.0371208	0.152652	0.0546746	0.849062
PPM1A	P35813	O75688;P35813	PPM1A_HUMAN	Protein phosphatase 1A	0.210904	3.34054	2.12589	0.00364462
HMGCL	P35914	P35914	HMGCL_HUMAN	Hydroxymethylglutaryl-CoA lyase, mitochondrial	-0.439252	-5.6139	3.65103	0.000137745
PSMC2	P35998	P35998	PRS7_HUMAN	26S proteasome regulatory subunit 7	0.260113	5.49051	3.57627	0.000144516
CHI3L1	P36222	P36222	CH3L1_HUMAN	Chitinase-3-like protein 1	0.260537	0.330906	0.126363	0.678858
GGT5	P36269	P36269	GGT5_HUMAN	Glutathione hydrolase 5 proenzyme	-0.493661	-0.987859	0.460271	0.246199
ARL2	P36404	P36404	ARL2_HUMAN	ADP-ribosylation factor-like protein 2	0.26148	5.49921	3.58157	0.000145172
ARL3	P36405	P36405	ARL3_HUMAN	ADP-ribosylation factor-like protein 3	-0.653157	-4.27953	2.79247	0.000861803
MAP2K2	P36507	P36507	MP2K2_HUMAN	Dual specificity mitogen-activated protein kinase kinase 2	0.330191	5.62945	3.66039	0.000138305
ATP5F1C	P36542	P36542	ATPG_HUMAN	ATP synthase subunit gamma, mitochondrial	-0.263305	-1.48551	0.774077	0.101369
ATP6V1E1	P36543	P36543	VATE1_HUMAN	V-type proton ATPase subunit E 1	-0.0333707	-0.205623	0.0750951	0.798236
CPOX	P36551	P36551	HEM6_HUMAN	Oxygen-dependent coproporphyrinogen-III oxidase, mitochondrial	0.419172	5.94162	3.84516	9.48012e-05
ARR3	P36575	P36575	ARRC_HUMAN	Arrestin-C	-0.627729	-4.36886	2.85338	0.000782918
RPL4	P36578	P36578	RL4_HUMAN	Large ribosomal subunit protein uL4	1.22986	8.90434	5.34152	2.88462e-05
LONP1	P36776	P36776	LONM_HUMAN	Lon protease homolog, mitochondrial	0.111437	0.912355	0.416745	0.280211
PGM1	P36871	P36871	PGM1_HUMAN	Phosphoglucomutase-1	0.290158	1.64916	0.885619	0.0746414
PPP1CC	P36873	P36873	PP1G_HUMAN	Serine/threonine-protein phosphatase PP1-gamma catalytic subunit	0.427737	4.85356	3.17535	0.000391009
GNL1	P36915	P36915	GNL1_HUMAN	Guanine nucleotide-binding protein-like 1	0.531327	6.38188	4.09601	5.41516e-05
POLR2I	P36954	P36954	RPB9_HUMAN	DNA-directed RNA polymerase II subunit RPB9	0.631379	4.02331	2.6152	0.0012609
SERPINF1	P36955	P36955	PEDF_HUMAN	Pigment epithelium-derived factor	0.163235	0.801215	0.354943	0.337005
DLST	P36957	P36957	ODO2_HUMAN	Dihydrolipoyllysine-residue succinyltransferase component of 2-oxoglutarate dehydrogenase complex, mitochondrial	0.0224364	0.201353	0.0734212	0.802478
GMPR	P36959	P36959	GMPR1_HUMAN	GMP reductase 1	0.75721	4.7231	3.09011	0.00042367
GPX4	P36969	P36969	GPX4_HUMAN	Phospholipid hydroperoxide glutathione peroxidase	-0.646233	-4.87141	3.18693	0.000374737
SRP14	P37108	P37108	SRP14_HUMAN	Signal recognition particle 14 kDa protein	0.759193	7.17759	4.52218	2.38949e-05
NUP62	P37198	P37198	NUP62_HUMAN	Nuclear pore glycoprotein p62	0.433622	4.05944	2.64043	0.00118138
HPCAL1	P37235	P37235	HPCL1_HUMAN	Hippocalcin-like protein 1	2.01756	4.68236	3.06328	0.00045821
FDFT1	P37268	P37268	FDFT_HUMAN	Squalene synthase	0.607086	1.64021	0.879435	0.0758973
TAGLN2	P37802	P37802	TAGL2_HUMAN	Transgelin-2	-0.0842652	-0.525195	0.214034	0.517327
TALDO1	P37837	P37837	TALDO_HUMAN	Transaldolase	0.559553	3.62736	2.33416	0.00220533
ETFB	P38117	P38117	ETFB_HUMAN	Electron transfer flavoprotein subunit beta	0.156073	1.09365	0.52324	0.205021
RBMX	P38159	P38159;Q96E39	RBMX_HUMAN	RNA-binding motif protein, X chromosome	0.441771	3.26078	2.06738	0.00412733
COIL	P38432	P38432	COIL_HUMAN	Coilin	0.327382	2.30488	1.35765	0.0221812
GGCX	P38435	P38435	VKGC_HUMAN	Vitamin K-dependent gamma-carboxylase	0.211065	1.36246	0.692616	0.126744
LIPA	P38571	P38571	LICH_HUMAN	Lysosomal acid lipase/cholesteryl ester hydrolase	-1.0321	-5.59644	3.64051	0.000136821
ATP6V1A	P38606	P38606	VATA_HUMAN	V-type proton ATPase catalytic subunit A	-0.0164894	-0.0959478	0.0336435	0.903887
HSPA9	P38646	P38646	GRP75_HUMAN	Stress-70 protein, mitochondrial	-0.0751372	-0.932979	0.428513	0.270377
EIF4A3	P38919	P38919	IF4A3_HUMAN	Eukaryotic initiation factor 4A-III	0.542181	6.51545	4.16994	4.92424e-05
IGHMBP2	P38935	P38935	SMBP2_HUMAN	DNA-binding protein SMUBP-2	0.226749	0.537549	0.219939	0.508294
RPS19	P39019	P39019	RS19_HUMAN	Small ribosomal subunit protein eS19	1.16952	8.32534	5.08141	2.16998e-05
RPL3	P39023	P39023	RL3_HUMAN	Large ribosomal subunit protein uL3	1.16466	8.24457	5.04401	2.08696e-05
COL15A1	P39059	P39059	COFA1_HUMAN	Collagen alpha-1(XV) chain	-0.455952	-0.813244	0.361497	0.33052
COL18A1	P39060	P39060	COIA1_HUMAN	Collagen alpha-1(XVIII) chain	1.00493	2.9077	1.80614	0.00770009
DDOST	P39656	P39656	OST48_HUMAN	Dolichyl-diphosphooligosaccharide--protein glycosyltransferase 48 kDa subunit	0.660235	7.20654	4.53706	2.42131e-05
ANP32A	P39687	P39687;O43423	AN32A_HUMAN	Acidic leucine-rich nuclear phosphoprotein 32 family member A	0.617652	2.95371	1.84035	0.0071
FEN1	P39748	P39748	FEN1_HUMAN	Flap endonuclease 1	0.872734	7.41718	4.64407	1.53846e-05
CUX1	P39880	P39880	CUX1_HUMAN	Homeobox protein cut-like 1	0.219439	2.94808	1.83617	0.0071812
CAPG	P40121	P40121	CAPG_HUMAN	Macrophage-capping protein	1.71413	5.69324	3.69862	0.000124395
CAP2	P40123	P40123	CAP2_HUMAN	Adenylyl cyclase-associated protein 2	0.463102	3.72941	2.40736	0.00187327
TXLNA	P40222	P40222	TXLNA_HUMAN	Alpha-taxilin	0.0257235	0.313121	0.118831	0.694952
CCT6A	P40227	P40227	TCPZ_HUMAN	T-complex protein 1 subunit zeta	0.104302	1.8344	1.01557	0.0529445
PSMB10	P40306	P40306	PSB10_HUMAN	Proteasome subunit beta type-10	0.0698278	0.466962	0.186729	0.563432
PBX1	P40424	P40424;P40425;P40426	PBX1_HUMAN	Pre-B-cell leukemia transcription factor 1	1.09622	6.63939	4.23765	4.71976e-05
PBX2	P40425	P40425	PBX2_HUMAN	Pre-B-cell leukemia transcription factor 2	1.37816	5.20913	3.40227	0.000257913
RPL13A	P40429	Q6NVV1;P40429	RL13A_HUMAN	Large ribosomal subunit protein uL13	1.16618	9.95555	5.781	4.44444e-05
ARL1	P40616	P40616	ARL1_HUMAN	ADP-ribosylation factor-like protein 1	-0.311448	-2.77381	1.70645	0.00966396
MLH1	P40692	P40692	MLH1_HUMAN	DNA mismatch repair protein Mlh1	0.29845	3.09431	1.94461	0.00556575
STAT3	P40763	P40763	STAT3_HUMAN	Signal transducer and activator of transcription 3	0.0812902	1.18261	0.577873	0.174642
USP8	P40818	P40818	UBP8_HUMAN	Ubiquitin carboxyl-terminal hydrolase 8	-0.372424	-4.19811	2.73656	0.000976959
PEX19	P40855	P40855	PEX19_HUMAN	Peroxisomal biogenesis factor 19	-0.392613	-0.87833	0.397532	0.296968
MDH1	P40925	P40925	MDHC_HUMAN	Malate dehydrogenase, cytoplasmic	0.276777	2.0005	1.13473	0.0390364
MDH2	P40926	P40926	MDHM_HUMAN	Malate dehydrogenase, mitochondrial	0.268879	1.51246	0.792212	0.096383
RFC5	P40937	P40937	RFC5_HUMAN	Replication factor C subunit 5	1.09045	3.05536	1.91577	0.00595349
RFC3	P40938	P40938	RFC3_HUMAN	Replication factor C subunit 3	0.746634	6.20221	3.99499	7.45131e-05
HADHA	P40939	P40939	ECHA_HUMAN	Trifunctional enzyme subunit alpha, mitochondrial	-0.266094	-2.45207	1.46678	0.0170565
EIF2S3	P41091	P41091	IF2G_HUMAN	Eukaryotic translation initiation factor 2 subunit 3	0.385251	4.88851	3.198	0.000368059
CETN2	P41208	P41208	CETN2_HUMAN	Centrin-2	-1.48597	-8.1916	5.01933	2.05128e-05
ETV6	P41212	P41212	ETV6_HUMAN	Transcription factor ETV6	0.593195	3.79984	2.45758	0.00170898
EIF2D	P41214	P41214	EIF2D_HUMAN	Eukaryotic translation initiation factor 2D	0.740712	7.54257	4.70673	1.61943e-05
MNDA	P41218	P41218	MNDA_HUMAN	Myeloid cell nuclear differentiation antigen	0.00557391	0.0193714	0.00659646	0.980462
PTGDS	P41222	P41222	PTGDS_HUMAN	Prostaglandin-H2 D-isomerase	0.291654	0.929667	0.426617	0.272059
BUD31	P41223	P41223	BUD31_HUMAN	Protein BUD31 homolog	0.306907	3.01811	1.88816	0.00632096
UBA7	P41226	P41226	UBA7_HUMAN	Ubiquitin-like modifier-activating enzyme 7	0.191556	2.36881	1.40498	0.0197539
NAA10	P41227	Q9BSU3;P41227	NAA10_HUMAN	N-alpha-acetyltransferase 10	0.142812	2.20587	1.28464	0.026618
KDM5C	P41229	P41229	KDM5C_HUMAN	Lysine-specific demethylase 5C	0.329462	3.52153	2.25772	0.00267956
PPP1R2	P41236	Q6NXS1;P41236	IPP2_HUMAN	Protein phosphatase inhibitor 2	0.0926284	0.626655	0.263664	0.443952
CSK	P41240	P41240	CSK_HUMAN	Tyrosine-protein kinase CSK	0.947554	12.6975	6.7659	0.000169014
PNPLA4	P41247	P41247	PLPL4_HUMAN	Patatin-like phospholipase domain-containing protein 4	-0.255736	-4.28586	2.79681	0.000841652
GARS1	P41250	P41250	GARS_HUMAN	Glycine--tRNA ligase	0.115265	1.50888	0.789793	0.0969926
IARS1	P41252	P41252	SYIC_HUMAN	Isoleucine--tRNA ligase, cytoplasmic	0.572863	7.72803	4.79804	1.72662e-05
EIF1	P41567	P41567	EIF1_HUMAN	Eukaryotic translation initiation factor 1	0.157607	1.22977	0.607428	0.160647
PRKCI	P41743	Q05513;P41743	KPCI_HUMAN	Protein kinase C iota type	0.646979	4.75312	3.10982	0.000422961
ACTR1B	P42025	P61163;P42025	ACTY_HUMAN	Beta-centractin	0.00859555	0.133629	0.0475239	0.867375
ECI1	P42126	P42126	ECI1_HUMAN	Enoyl-CoA delta isomerase 1, mitochondrial	-0.186142	-1.0976	0.525633	0.203548
TMPO	P42166	P42166	LAP2A_HUMAN	Lamina-associated polypeptide 2, isoform alpha	0.802569	7.80874	4.83727	1.8018e-05
STAT1	P42224	P42224	STAT1_HUMAN	Signal transducer and activator of transcription 1-alpha/beta	-0.052487	-0.347478	0.133456	0.664094
STAT6	P42226	P42226	STAT6_HUMAN	Signal transducer and activator of transcription 6	0.960095	18.212	8.27162	0
STAT5A	P42229	P42229	STA5A_HUMAN	Signal transducer and activator of transcription 5A	0.38007	1.22484	0.604314	0.161984
MTREX	P42285	P42285	MTREX_HUMAN	Exosome RNA helicase MTR4	0.470275	5.18131	3.38479	0.000256944
AKR1C3	P42330	P42330;Q04828;P52895	AK1C3_HUMAN	Aldo-keto reductase family 1 member C3	-1.06206	-2.849	1.76246	0.00855995
ARHGAP25	P42331	P42331	RHG25_HUMAN	Rho GTPase-activating protein 25	0.906745	2.16468	1.2544	0.028741
PIK3CA	P42336	P42336	PK3CA_HUMAN	Phosphatidylinositol 4,5-bisphosphate 3-kinase catalytic subunit alpha isoform	-0.524892	-1.58274	0.839942	0.084458
PIK3CB	P42338	P42338	PK3CB_HUMAN	Phosphatidylinositol 4,5-bisphosphate 3-kinase catalytic subunit beta isoform	-0.124761	-1.02649	0.483001	0.230487
MTOR	P42345	P42345	MTOR_HUMAN	Serine/threonine-protein kinase mTOR	0.382601	7.37587	4.62325	1.52478e-05
PI4KA	P42356	P42356	PI4KA_HUMAN	Phosphatidylinositol 4-kinase alpha	0.179769	3.90018	2.52869	0.0014916
EPS15	P42566	P42566	EPS15_HUMAN	Epidermal growth factor receptor substrate 15	0.0478704	0.614712	0.257688	0.452176
CASP3	P42574	P42574	CASP3_HUMAN	Caspase-3	-0.286975	-2.51212	1.51144	0.0153641
CASP2	P42575	P42575	CASP2_HUMAN	Caspase-2	0.645804	4.23887	2.7646	0.000919033
RPS27	P42677	P42677	RS27_HUMAN	Small ribosomal subunit protein eS27	1.53697	7.06746	4.46519	2.29621e-05
TEC	P42680	P42680	TEC_HUMAN	Tyrosine-protein kinase Tec	0.651896	1.99818	1.13306	0.0391494
HELZ	P42694	P42694	HELZ_HUMAN	Probable helicase with zinc finger domain	-0.0536984	-0.272002	0.101739	0.733727
NCAPD3	P42695	P42695	CNDD3_HUMAN	Condensin-2 complex subunit D3	0	NaN	NaN	1
RBM34	P42696	P42696	RBM34_HUMAN	RNA-binding protein 34	1.91202	3.75248	2.42384	0.0018098
LRPPRC	P42704	P42704	LPPRC_HUMAN	Leucine-rich PPR motif-containing protein, mitochondrial	0.0317109	0.263619	0.0983095	0.741411
ACAA2	P42765	P42765	THIM_HUMAN	3-ketoacyl-CoA thiolase, mitochondrial	0.383797	1.39014	0.710743	0.120533
RPL35	P42766	P42766	RL35_HUMAN	Large ribosomal subunit protein uL29	0.856897	6.1207	3.94854	7.89474e-05
CDKN2A	P42771	P42772;P42771	CDN2A_HUMAN	Cyclin-dependent kinase inhibitor 2A	-1.13912	-4.97772	3.25548	0.00034632
CDKN2C	P42773	P42773	CDN2C_HUMAN	Cyclin-dependent kinase 4 inhibitor C	1.63786	5.45597	3.55517	0.000160612
PRCP	P42785	P42785	PCP_HUMAN	Lysosomal Pro-X carboxypeptidase	0.749781	3.01439	1.8854	0.00637081
HTT	P42858	P42858	HD_HUMAN	Huntingtin	-0.0113529	-0.294896	0.1112	0.711649
ECE1	P42892	P42892	ECE1_HUMAN	Endothelin-converting enzyme 1	0.411224	1.01479	0.476087	0.23516
MTHFR	P42898	P42898	MTHR_HUMAN	Methylenetetrahydrofolate reductase (NADPH)	1.0457	3.59631	2.31179	0.00235692
SLC1A4	P43007	P43007	SATT_HUMAN	Neutral amino acid transporter A	-1.36358	-5.04247	3.29688	0.000305479
PAFAH1B1	P43034	P43034	LIS1_HUMAN	Platelet-activating factor acetylhydrolase IB subunit beta	0.226372	3.9122	2.53717	0.00146319
MCAM	P43121	P43121	MUC18_HUMAN	Cell surface glycoprotein MUC18	-0.753762	-1.82705	1.01035	0.0536955
CRAT	P43155	P43155	CACP_HUMAN	Carnitine O-acetyltransferase	0.659806	3.21184	2.03138	0.00447843
MATR3	P43243	P43243	MATR3_HUMAN	Matrin-3	0.439094	3.21496	2.03368	0.00446379
MSH2	P43246	P43246	MSH2_HUMAN	DNA mismatch repair protein Msh2	0.550719	6.00357	3.88114	8.125e-05
BTD	P43251	P43251	BTD_HUMAN	Biotinidase	-0.232865	-2.34715	1.38893	0.0205606
GPD2	P43304	P43304	GPDM_HUMAN	Glycerol-3-phosphate dehydrogenase, mitochondrial	0.797945	4.34843	2.8395	0.000803177
SSR1	P43307	P43307	SSRA_HUMAN	Translocon-associated protein subunit alpha	0.906354	6.17853	3.98153	7.40741e-05
ALDH3B1	P43353	P43353	AL3B1_HUMAN	Aldehyde dehydrogenase family 3 member B1	-2.82998	-7.15228	4.50914	2.36407e-05
PTPN9	P43378	P43378	PTN9_HUMAN	Tyrosine-protein phosphatase non-receptor type 9	0.236271	0.905824	0.413037	0.283113
SYK	P43405	P43405	KSYK_HUMAN	Tyrosine-protein kinase SYK	0.543163	4.99754	3.26818	0.000333515
RANBP1	P43487	P43487	RANG_HUMAN	Ran-specific GTPase-activating protein	0.50148	5.53831	3.60534	0.000136126
NAMPT	P43490	P43490	NAMPT_HUMAN	Nicotinamide phosphoribosyltransferase	0.82346	10.8409	6.12217	6.97674e-05
AFM	P43652	P43652	AFAM_HUMAN	Afamin	0.345127	0.85999	0.387282	0.306316
PSMC4	P43686	P43686	PRS6B_HUMAN	26S proteasome regulatory subunit 6B	0.159245	2.65493	1.61784	0.0120416
TSFM	P43897	P43897	EFTS_HUMAN	Elongation factor Ts, mitochondrial	-0.147141	-0.963436	0.446059	0.256463
VDAC2	P45880	P45880	VDAC2_HUMAN	Voltage-dependent anion-selective channel protein 2	-0.495414	-3.0643	1.9224	0.00584308
ACADSB	P45954	P45954	ACDSB_HUMAN	Short/branched chain specific acyl-CoA dehydrogenase, mitochondrial	-0.118637	-0.629631	0.265158	0.442053
CBX5	P45973	P45973	CBX5_HUMAN	Chromobox protein homolog 5	1.23323	10.0104	5.80285	4.5977e-05
USP5	P45974	P45974	UBP5_HUMAN	Ubiquitin carboxyl-terminal hydrolase 5	0.984263	13.8998	7.13947	0
MAPK9	P45984	P45984	MK09_HUMAN	Mitogen-activated protein kinase 9	0.141104	1.95546	1.10221	0.0423339
MAP2K4	P45985	P45985	MP2K4_HUMAN	Dual specificity mitogen-activated protein kinase kinase 4	0.239388	2.91914	1.81466	0.00751851
MKI67	P46013	P46013	KI67_HUMAN	Proliferation marker protein Ki-67	0.118913	0.37076	0.143543	0.643355
PHKA2	P46019	P46019	KPB2_HUMAN	Phosphorylase b kinase regulatory subunit alpha, liver isoform	0.0629594	1.04718	0.495301	0.222405
PHKA1	P46020	P46020	KPB1_HUMAN	Phosphorylase b kinase regulatory subunit alpha, skeletal muscle isoform	-0.294773	-0.744317	0.324394	0.369677
RANGAP1	P46060	P46060	RAGP1_HUMAN	Ran GTPase-activating protein 1	0.36593	7.94885	4.90466	1.88679e-05
RECQL	P46063	P46063	RECQ1_HUMAN	ATP-dependent DNA helicase Q1	0.325852	1.65711	0.891123	0.0736667
NOP2	P46087	P46087	NOP2_HUMAN	Probable 28S rRNA (cytosine(4447)-C(5))-methyltransferase	1.27818	10.2373	5.89225	5.19481e-05
ATRX	P46100	P46100	ATRX_HUMAN	Transcriptional regulator ATRX	0.787649	7.27207	4.57059	2.46914e-05
CRK	P46108	P46108	CRK_HUMAN	Adapter molecule crk	0.954725	11.6106	6.39993	0.00010084
CRKL	P46109	P46109	CRKL_HUMAN	Crk-like protein	0.372764	4.80914	3.14645	0.000407656
MTIF2	P46199	P46199	IF2M_HUMAN	Translation initiation factor IF-2, mitochondrial	-0.109955	-1.56431	0.827365	0.0874747
BAG6	P46379	P46379	BAG6_HUMAN	Large proline-rich protein BAG6	0.247619	3.18647	2.01268	0.00468096
NSF	P46459	P46459	NSF_HUMAN	Vesicle-fusing ATPase	0.0580795	0.659722	0.280392	0.422547
MAP2K3	P46734	P46734	MP2K3_HUMAN	Dual specificity mitogen-activated protein kinase kinase 3	0.650437	7.14168	4.50367	2.35849e-05
BRCC3	P46736	P46736	BRCC3_HUMAN	Lys-63-specific deubiquitinase BRCC36	0.353768	4.66199	3.04982	0.000478749
RPL27A	P46776	P46776	RL27A_HUMAN	Large ribosomal subunit protein uL15	1.2581	8.6013	5.20709	2.47423e-05
RPL5	P46777	P46777	RL5_HUMAN	Large ribosomal subunit protein uL18	1.11788	10.1726	5.86693	5.04202e-05
RPL21	P46778	P46778	RL21_HUMAN	Large ribosomal subunit protein eL21	1.24844	8.15762	5.00344	1.99667e-05
RPL28	P46779	P46779	RL28_HUMAN	Large ribosomal subunit protein eL28	1.14749	10.608	6.03477	6.28272e-05
RPS9	P46781	P46781	RS9_HUMAN	Small ribosomal subunit protein uS4	1.08909	8.6951	5.2491	2.60304e-05
RPS5	P46782	P46782	RS5_HUMAN	Small ribosomal subunit protein uS7	1.23427	9.91098	5.76316	4.37956e-05
RPS10	P46783	P46783	RS10_HUMAN	Small ribosomal subunit protein eS10	1.24738	10.0074	5.80166	4.58015e-05
MAP1B	P46821	P46821	MAP1B_HUMAN	Microtubule-associated protein 1B	-2.32968	-9.65935	5.66117	3.85852e-05
GNPDA1	P46926	P46926;Q8TDQ7	GNPI1_HUMAN	Glucosamine-6-phosphate isomerase 1	0.872867	10.4157	5.96139	5.71429e-05
YAP1	P46937	P46937	YAP1_HUMAN	Transcriptional coactivator YAP1	0.920793	12.2362	6.61411	0.000136364
UTRN	P46939	P46939	UTRN_HUMAN	Utrophin	-0.110191	-0.650552	0.275726	0.428337
IQGAP1	P46940	P46940	IQGA1_HUMAN	Ras GTPase-activating-like protein IQGAP1	0.0785108	1.0511	0.497643	0.220946
HAAO	P46952	P46952	3HAO_HUMAN	3-hydroxyanthranilate 3,4-dioxygenase	0.133745	0.447434	0.177768	0.579172
GYG1	P46976	P46976	GLYG_HUMAN	Glycogenin-1	-0.0286276	-0.148579	0.0531356	0.853032
STT3A	P46977	P46977	STT3A_HUMAN	Dolichyl-diphosphooligosaccharide--protein glycosyltransferase subunit STT3A	0.772716	9.02024	5.39198	2.96296e-05
RABIF	P47224	P47224	MSS4_HUMAN	Guanine nucleotide exchange factor MSS4	-0.245377	-0.303417	0.114757	0.703591
PLA2G4A	P47712	P47712	PA24A_HUMAN	Cytosolic phospholipase A2	1.73059	3.45857	2.21202	0.00294422
CAPZA2	P47755	P47755	CAZA2_HUMAN	F-actin-capping protein subunit alpha-2	0.16324	1.29785	0.650769	0.142338
CAPZB	P47756	P47756	CAPZB_HUMAN	F-actin-capping protein subunit beta	0.231162	4.16149	2.71128	0.00101866
ALDH1A3	P47895	P47895	AL1A3_HUMAN	Retinaldehyde dehydrogenase 3	-0.171378	-0.389978	0.151977	0.627399
QARS1	P47897	P47897	SYQ_HUMAN	Glutamine--tRNA ligase	0.148073	3.20934	2.02953	0.00449477
RPL29	P47914	P47914	RL29_HUMAN	Large ribosomal subunit protein eL29	1.17358	7.23329	4.55078	2.43605e-05
ID4	P47928	P47928	ID4_HUMAN	DNA-binding protein inhibitor ID-4	0.451971	2.53668	1.52972	0.0147068
LGALS7B	P47929	P47929	LEG7_HUMAN	Galectin-7	-0.151556	-0.147543	0.0527448	0.853904
ZFP36L2	P47974	Q07352;P47974	TISD_HUMAN	mRNA decay activator protein ZFP36L2	0.323977	0.738145	0.321126	0.373447
UQCRFS1	P47985	P0C7P4;P47985	UCRI_HUMAN	Cytochrome b-c1 complex subunit Rieske, mitochondrial	0.0574849	0.454521	0.181009	0.573407
ATP5PO	P48047	P48047	ATPO_HUMAN	ATP synthase subunit O, mitochondrial	-0.242377	-1.33378	0.673959	0.13342
LIMS1	P48059	P48059	LIMS1_HUMAN	LIM and senescent cell antigen-like-containing domain protein 1	0.815274	1.97368	1.11535	0.0410372
PREP	P48147	P48147	PPCE_HUMAN	Prolyl endopeptidase	0.908424	7.87713	4.87027	1.83767e-05
ME1	P48163	P48163	MAOX_HUMAN	NADP-dependent malic enzyme	-0.569028	-4.4108	2.8818	0.000721519
IREB2	P48200	P48200	IREB2_HUMAN	Iron-responsive element-binding protein 2	0.396279	1.84601	1.02383	0.0517897
RFX2	P48378	P48378	RFX2_HUMAN	DNA-binding protein RFX2	-1.98928	-7.32637	4.5982	1.50565e-05
RFX3	P48380	P22670;P48378;P48380	RFX3_HUMAN	Transcription factor RFX3	-1.28474	-8.28897	5.0646	2.12766e-05
RFX5	P48382	P48382	RFX5_HUMAN	DNA-binding protein RFX5	0.582511	3.21595	2.03441	0.00445772
PIP4K2A	P48426	P48426	PI42A_HUMAN	Phosphatidylinositol 5-phosphate 4-kinase type-2 alpha	0.362448	2.89451	1.79634	0.00784116
ARCN1	P48444	P48444	COPD_HUMAN	Coatomer subunit delta	0.189439	3.49694	2.23989	0.00280728
LSS	P48449	P48449	LSS_HUMAN	Lanosterol synthase	0.282419	1.52199	0.798646	0.0945951
GCLC	P48506	P48506	GSH1_HUMAN	Glutamate--cysteine ligase catalytic subunit	0.549454	1.33547	0.675051	0.132994
GCLM	P48507	P48507	GSH0_HUMAN	Glutamate--cysteine ligase regulatory subunit	-1.6761	-8.36625	5.10024	2.22222e-05
CD151	P48509	P48509	CD151_HUMAN	CD151 antigen	0.764171	1.9753	1.11652	0.0409042
PCP4	P48539	P48539	PCP4_HUMAN	Calmodulin regulator protein PCP4	2.94744	5.12821	3.35131	0.000269231
PSMD8	P48556	P48556	PSMD8_HUMAN	26S proteasome non-ATPase regulatory subunit 8	0.220998	3.72427	2.40369	0.00188723
PRRC2A	P48634	P48634	PRC2A_HUMAN	Protein PRRC2A	0.468615	4.15418	2.70622	0.00102857
GSS	P48637	P48637	GSHB_HUMAN	Glutathione synthetase	0.543768	4.72362	3.09045	0.000423881
CCT5	P48643	P48643	TCPE_HUMAN	T-complex protein 1 subunit epsilon	0.176374	4.71314	3.08357	0.00043254
PTDSS1	P48651	P48651	PTSS1_HUMAN	Phosphatidylserine synthase 1	0.698963	1.61264	0.860442	0.0798528
NES	P48681	P48681	NEST_HUMAN	Nestin	0.603097	2.02951	1.15576	0.0369792
HSPA13	P48723	P48723	HSP13_HUMAN	Heat shock 70 kDa protein 13	-0.0605154	-0.107601	0.0378957	0.89269
AMT	P48728	P48728	GCST_HUMAN	Aminomethyltransferase, mitochondrial	0.458101	3.20582	2.02694	0.00451409
CSNK1A1	P48729	P48729;Q8N752	KC1A_HUMAN	Casein kinase I isoform alpha	-0.247742	-2.79949	1.72559	0.00925169
CSNK1D	P48730	P48730	KC1D_HUMAN	Casein kinase I isoform delta	0.282962	0.377896	0.146664	0.637701
IDH2	P48735	P48735	IDHP_HUMAN	Isocitrate dehydrogenase [NADP], mitochondrial	-0.921636	-5.42645	3.53708	0.000163934
PITPNB	P48739	P48739	PIPNB_HUMAN	Phosphatidylinositol transfer protein beta isoform	0.62964	6.93692	4.39683	3.03688e-05
ADGRE5	P48960	P48960	AGRE5_HUMAN	Adhesion G protein-coupled receptor E5	-0.489184	-3.57694	2.29781	0.00243417
POLD2	P49005	P49005	DPOD2_HUMAN	DNA polymerase delta subunit 2	0.0242217	0.192825	0.0700928	0.810746
MARCKSL1	P49006	P49006	MRP_HUMAN	MARCKS-related protein	1.88147	6.54921	4.18847	4.96657e-05
PXN	P49023	P49023	PAXI_HUMAN	Paxillin	0.0903397	1.2036	0.590976	0.168161
NR2C2	P49116	P49116	NR2C2_HUMAN	Nuclear receptor subfamily 2 group C member 2	0.228023	3.96332	2.57315	0.00136243
MAPKAPK2	P49137	P49137	MAPK2_HUMAN	MAP kinase-activated protein kinase 2	-0.173094	-2.38167	1.41451	0.0193797
ALDH9A1	P49189	P49189	AL9A1_HUMAN	4-trimethylaminobutyraldehyde dehydrogenase	0.492021	5.0916	3.32813	0.000286996
RPL34	P49207	P49207	RL34_HUMAN	Large ribosomal subunit protein eL34	1.01506	11.3369	6.30304	9.09091e-05
RPIA	P49247	P49247	RPIA_HUMAN	Ribose-5-phosphate isomerase	1.16024	5.95338	3.852	8.90253e-05
LMAN1	P49257	P49257	LMAN1_HUMAN	Protein ERGIC-53	0.392045	4.85411	3.1757	0.000391213
NASP	P49321	P49321	NASP_HUMAN	Nuclear autoantigenic sperm protein	0.731211	5.23391	3.41778	0.000243211
FASN	P49327	P49327	FAS_HUMAN	Fatty acid synthase	0.405507	2.64368	1.60945	0.0122836
FNTA	P49354	P49354	FNTA_HUMAN	Protein farnesyltransferase/geranylgeranyltransferase type-1 subunit alpha	0.197019	2.83849	1.75464	0.00868571
FNTB	P49356	P49356	FNTB_HUMAN	Protein farnesyltransferase subunit beta	0.778051	3.79808	2.45633	0.00170582
DHPS	P49366	P49366	DHYS_HUMAN	Deoxyhypusine synthase	-0.342549	-3.33773	2.12383	0.00365823
CCT3	P49368	P49368	TCPG_HUMAN	T-complex protein 1 subunit gamma	0.193096	5.19779	3.39515	0.000256709
MRPL19	P49406	P49406	RM19_HUMAN	Large ribosomal subunit protein bL19m	0.0258385	0.376127	0.145889	0.639006
ARRB1	P49407	P49407	ARRB1_HUMAN	Beta-arrestin-1	-0.309626	-1.2881	0.644513	0.144948
TUFM	P49411	P49411	EFTU_HUMAN	Elongation factor Tu, mitochondrial	-0.403969	-3.55057	2.27874	0.00252763
ALDH7A1	P49419	P49419	AL7A1_HUMAN	Alpha-aminoadipic semialdehyde dehydrogenase	1.00651	6.21834	4.00413	7.47664e-05
CDC34	P49427	P49427	UB2R1_HUMAN	Ubiquitin-conjugating enzyme E2 R1	0.327383	1.30126	0.652959	0.141467
INPP1	P49441	P49441	INPP_HUMAN	Inositol polyphosphate 1-phosphatase	0.0431068	0.439532	0.17417	0.585228
CENPA	P49450	P49450	CENPA_HUMAN	Histone H3-like centromeric protein A	2.88602	7.33198	4.60105	1.50943e-05
CENPF	P49454	P49454	CENPF_HUMAN	Centromere protein F	0	NaN	NaN	1
SRP9	P49458	P49458	SRP09_HUMAN	Signal recognition particle 9 kDa protein	0.730098	7.59661	4.7335	1.64835e-05
UBE2A	P49459	P49459	UBE2A_HUMAN	Ubiquitin-conjugating enzyme E2 A	0.0904732	0.163928	0.0589591	0.838675
PCYT1A	P49585	P49585	PCY1A_HUMAN	Choline-phosphate cytidylyltransferase A	-0.0795402	-0.615329	0.257996	0.451754
AARS1	P49588	P49588	SYAC_HUMAN	Alanine--tRNA ligase, cytoplasmic	0.134991	1.8389	1.01876	0.0524979
CARS1	P49589	P49589	SYCC_HUMAN	Cysteine--tRNA ligase, cytoplasmic	-0.0679932	-1.30798	0.657287	0.139687
HARS2	P49590	P49590	SYHM_HUMAN	Histidine--tRNA ligase, mitochondrial	-0.781543	-7.98378	4.92132	1.91693e-05
SARS1	P49591	P49591	SYSC_HUMAN	Serine--tRNA ligase, cytoplasmic	0.687966	8.07256	4.96343	1.96399e-05
PPM1F	P49593	P49593	PPM1F_HUMAN	Protein phosphatase 1F	0.818526	2.89628	1.79766	0.00781908
PRIM1	P49642	P49642	PRI1_HUMAN	DNA primase small subunit	-0.0628875	-0.165842	0.0596895	0.836861
PRIM2	P49643	P49643	PRI2_HUMAN	DNA primase large subunit	-0.228996	-0.621763	0.261211	0.447375
CSNK1E	P49674	P49674;P48730	KC1E_HUMAN	Casein kinase I isoform epsilon	-0.15371	-1.34789	0.683118	0.130149
CTCF	P49711	P49711;Q8NI51	CTCF_HUMAN	Transcriptional repressor CTCF	1.2462	2.54455	1.53559	0.0144926
PSMB3	P49720	P49720	PSB3_HUMAN	Proteasome subunit beta type-3	0.146877	2.7515	1.68983	0.0100669
PSMB2	P49721	P49721	PSB2_HUMAN	Proteasome subunit beta type-2	0.318537	3.46811	2.21895	0.00290835
MCM2	P49736	P49736	MCM2_HUMAN	DNA replication licensing factor MCM2	1.39688	2.93914	1.82953	0.00726794
ACADVL	P49748	P49748	ACADV_HUMAN	Very long-chain specific acyl-CoA dehydrogenase, mitochondrial	0.152731	1.16321	0.565832	0.180734
YLPM1	P49750	P49750	YLPM1_HUMAN	YLP motif-containing protein 1	0.317802	2.94749	1.83573	0.00719671
VPS41	P49754	P49754	VPS41_HUMAN	Vacuolar protein sorting-associated protein 41 homolog	-0.459223	-1.78166	0.978216	0.0581932
TMED10	P49755	P49755	TMEDA_HUMAN	Transmembrane emp24 domain-containing protein 10	0.206384	2.71562	1.66308	0.0107254
RBM25	P49756	P49756	RBM25_HUMAN	RNA-binding protein 25	0.319838	3.82251	2.47369	0.00164099
NUMB	P49757	P49757	NUMB_HUMAN	Protein numb homolog	-0.174993	-1.43015	0.737153	0.112358
CLK2	P49760	P49760	CLK2_HUMAN	Dual specificity protein kinase CLK2	0.891937	2.99798	1.87323	0.00657381
EIF2B2	P49770	P49770	EI2BB_HUMAN	Translation initiation factor eIF-2B subunit beta	0.379302	5.99057	3.8736	8.70241e-05
HINT1	P49773	P49773	HINT1_HUMAN	Adenosine 5'-monophosphoramidase HINT1	-0.184623	-2.0834	1.19496	0.0333986
FHIT	P49789	P49789	FHIT_HUMAN	Bis(5'-adenosyl)-triphosphatase	1.0201	2.58274	1.56404	0.0137103
NUP153	P49790	P49790	NU153_HUMAN	Nuclear pore complex protein Nup153	0.106641	1.08378	0.517269	0.20843
RANBP2	P49792	P49792	RBP2_HUMAN	E3 SUMO-protein ligase RanBP2	0.354614	5.94615	3.8478	9.49464e-05
TSC2	P49815	P49815	TSC2_HUMAN	Tuberin	-0.0291855	-0.59505	0.247927	0.465948
NDUFV1	P49821	P49821	NDUV1_HUMAN	NADH dehydrogenase [ubiquinone] flavoprotein 1, mitochondrial	0.297947	3.82076	2.47245	0.00164363
GSK3A	P49840	P49841;P49840	GSK3A_HUMAN	Glycogen synthase kinase-3 alpha	0.495133	1.16246	0.565365	0.181002
GSK3B	P49841	P49841	GSK3B_HUMAN	Glycogen synthase kinase-3 beta	0.255577	0.645942	0.273388	0.431532
STK19	P49842	P49842	STK19_HUMAN	Serine/threonine-protein kinase 19	0.657085	4.78675	3.13183	0.000414784
TAF6	P49848	P49848	TAF6_HUMAN	Transcription initiation factor TFIID subunit 6	0.628936	1.55166	0.818753	0.089604
NT5C2	P49902	P49902	5NTC_HUMAN	Cytosolic purine 5'-nucleotidase	-0.219032	-2.57637	1.55929	0.0138742
[truncated: 4,797 more rows]
