# Supplementary material for: Spatial proteomics of ovarian cancer precursors delineates early disease changes and drug targets
Source: Mol Syst Biol. 2025 Nov 13;22(1):7–41. doi: 10.1038/s44320-025-00168-4 (PMC12759074; doi:10.1038/s44320-025-00168-4)
Supplement: Supplementary file 17 — Dataset EV11 [file 44320_2025_168_MOESM17_ESM.xlsx]

## Sheet: Legend
Dataset EV11. Student's t-test results used for differential abundance of cluster 1 and cluster 2 STIC/IC samples and visualization in the volcano plot figure 4C.

## Sheet: Dataset EV11
Gene	Protein Group	Protein ID	Protein name	First protein description	T-test difference (pre-malignant vs. normal FTE, log2)	T-test statistic	T-test p-value (-log10)	T-test q-value (-log10)
IGKV3-7	A0A075B6H7	A0A075B6H7;A0A0C4DH90;A0A0C4DH55;P01624	KV37_HUMAN	Probable non-functional immunoglobulin kappa variable 3-7	-0.979084	-1.93827	1.24301	0.129341
IGLV3-10	A0A075B6K4	A0A075B6K4;A0A075B6K0	LV310_HUMAN	Immunoglobulin lambda variable 3-10	-0.103086	-0.303881	0.11791	0.854428
IGKV2-28;IGKV2D-28	A0A075B6P5;P01615	A0A075B6P5;P01615	KV228_HUMAN;KVD28_HUMAN	Immunoglobulin kappa variable 2-28	-0.101424	-0.444884	0.181805	0.780966
IGKV2-24;IGKV2D-24	A0A075B6R9;A0A0C4DH68	A0A075B6R9;A0A0C4DH68	KV224_HUMAN;KVD24_HUMAN	Probable non-functional immunoglobulin kappa variable 2D-24	-0.619008	-1.48926	0.849277	0.263556
IGHV3OR16-12	A0A075B7B8	A0A075B7B8	A0A075B7B8_HUMAN	Immunoglobulin heavy variable 3/OR16-12 (non-functional) (Fragment)	-0.225655	-0.893595	0.425975	0.540347
IGHV1OR15-1	A0A075B7D0	A0A075B7D0	A0A075B7D0_HUMAN	Immunoglobulin heavy variable 1/OR15-1 (non-functional) (Fragment)	0.284142	0.615012	0.266965	0.692742
IGHV3OR15-7	A0A075B7D8	A0A075B7D8	A0A075B7D8_HUMAN	Immunoglobulin heavy variable 3/OR15-7 (pseudogene) (Fragment)	-0.192264	-0.937603	0.453351	0.516569
IGKV3D-15	A0A087WSY6	A0A087WSY6	KVD15_HUMAN	Immunoglobulin kappa variable 3D-15	-0.061343	-0.222073	0.083553	0.892372
IGKV3-11;IGKV3D-11	A0A0A0MRZ8;P04433	A0A0A0MRZ8;P04433	KV311_HUMAN;KVD11_HUMAN	Immunoglobulin kappa variable 3D-11	-0.418656	-1.37843	0.761896	0.305147
IGHV3-49	A0A0A0MS15	A0A0B4J1V6;A0A0A0MS15	HV349_HUMAN	Immunoglobulin heavy variable 3-49	0.0707254	0.265338	0.101478	0.872276
IGHV6-1	A0A0B4J1U7	A0A0B4J1U7	HV601_HUMAN	Immunoglobulin heavy variable 6-1	0.422838	1.54506	0.894755	0.243122
IGHV3-15	A0A0B4J1V0	A0A0B4J1V0	HV315_HUMAN	Immunoglobulin heavy variable 3-15	-0.113886	-0.396602	0.159253	0.808649
GATD3;GATD3B	A0A0B4J2D5;P0DPI2	P0DPI2;A0A0B4J2D5	GAL3A_HUMAN;GAL3B_HUMAN	Putative glutamine amidotransferase-like class 1 domain-containing protein 3B, mitochondrial	0.0531031	0.3224	0.125962	0.845479
IGKV3D-20	A0A0C4DH25	A0A0C4DH25	KVD20_HUMAN	Immunoglobulin kappa variable 3D-20	-0.0698979	-0.24797	0.0942166	0.880487
IGHV3-35	A0A0C4DH35	A0A0C4DH35	HV335_HUMAN	Probable non-functional immunoglobulin heavy variable 3-35	-0.277913	-1.2736	0.682856	0.350254
IGHV5-51	A0A0C4DH38	A0A0C4DH38	HV551_HUMAN	Immunoglobulin heavy variable 5-51	-0.164755	-0.573492	0.245356	0.713167
IGHV4-30-4;IGHV4-34;IGHV4-38-2;IGHV4-39;IGHV4-59;IGHV4-61	A0A0C4DH41;P01824;P01825;P06331;P0DP06;P0DP08	P0DP06;P0DP08;P01824;P01825;A0A0C4DH41;A0A0J9YWU9;P06331	HV434_HUMAN;HV439_HUMAN;HV459_HUMAN;HV461_HUMAN;HVD34_HUMAN;HVD82_HUMAN	Immunoglobulin heavy variable 4-61	0.0624814	0.320432	0.125102	0.846333
	A0A0G2JRQ6	A0A0G2JRQ6	A0A0G2JRQ6_HUMAN	Ig-like domain-containing protein (Fragment)	0.0411596	0.181308	0.0671626	0.913623
IGHV3-64D	A0A0J9YX35	A0A0J9YX35	HV64D_HUMAN	Immunoglobulin heavy variable 3-64D	0.152736	0.625613	0.272569	0.686707
GNG5B	A0A804HLA8	A0A804HLA8;P63218	GBG5B_HUMAN	Guanine nucleotide-binding protein G(I)/G(S)/G(O) subunit gamma-5B	0.153689	0.799303	0.369403	0.588166
RBM47	A0AV96	A0AV96	RBM47_HUMAN	RNA-binding protein 47	0.334137	2.29777	1.60272	0.0651032
IFT56	A0AVF1	A0AVF1	IFT56_HUMAN	Intraflagellar transport protein 56	-0.536782	-4.97633	5.26373	9.63855e-06
TMEM129	A0AVI4	A0AVI4	TM129_HUMAN	E3 ubiquitin-protein ligase TM129	-0.117843	-0.810174	0.375781	0.582666
UBA6	A0AVT1	A0AVT1	UBA6_HUMAN	Ubiquitin-like modifier-activating enzyme 6	-0.136926	-1.38429	0.766418	0.302729
ESYT2	A0FGR8	A0FGR8	ESYT2_HUMAN	Extended synaptotagmin-2	0.158856	1.52892	0.881501	0.249114
SHTN1	A0MZ66	A0MZ66	SHOT1_HUMAN	Shootin-1	0.449904	3.21287	2.68071	0.00745136
TMEM223	A0PJW6	A0PJW6	TM223_HUMAN	Transmembrane protein 223	-0.172133	-1.42886	0.801167	0.286449
ARHGEF37	A1IGU5	A1IGU5	ARH37_HUMAN	Rho guanine nucleotide exchange factor 37	0.340528	2.49859	1.82006	0.0424903
MEX3A	A1L020	Q86XN8;Q6ZN04;Q5U5Q3;A1L020	MEX3A_HUMAN	RNA-binding protein MEX3A	-1.13796	-7.54034	9.6046	0
ILVBL	A1L0T0	A1L0T0	HACL2_HUMAN	2-hydroxyacyl-CoA lyase 2	0.0941384	0.704136	0.315168	0.641744
C1orf226	A1L170	A1L170	CA226_HUMAN	Uncharacterized protein C1orf226	-0.280019	-1.29087	0.695633	0.342517
PLEKHG3	A1L390	A1L390	PKHG3_HUMAN	Pleckstrin homology domain-containing family G member 3	-0.128026	-1.63001	0.965891	0.215487
SH3PXD2B	A1X283	A1X283	SPD2B_HUMAN	SH3 and PX domain-containing protein 2B	0.0235221	0.215997	0.0810793	0.895099
NBAS	A2RRP1	A2RRP1	NBAS_HUMAN	NBAS subunit of NRZ tethering complex	0.0629179	0.985197	0.483655	0.491631
TARS3	A2RTX5	A2RTX5	SYTC2_HUMAN	Threonine--tRNA ligase 2, cytoplasmic	-0.0105802	-0.0562988	0.0198671	0.97543
TYW5	A2RUC4	A2RUC4	TYW5_HUMAN	tRNA wybutosine-synthesizing protein 5	0.114383	1.15955	0.600881	0.404098
VWA8	A3KMH1	A3KMH1	VWA8_HUMAN	von Willebrand factor A domain-containing protein 8	0.0922094	0.674869	0.299064	0.657568
SBNO1	A3KN83	A3KN83	SBNO1_HUMAN	Protein strawberry notch homolog 1	-0.444493	-6.64465	8.05414	0
GTPBP10	A4D1E9	A4D1E9	GTPBA_HUMAN	GTP-binding protein 10	0.031976	0.290376	0.112103	0.86023
WDR91	A4D1P6	A4D1P6	WDR91_HUMAN	WD repeat-containing protein 91	0.191675	1.97605	1.27899	0.121577
DENND11	A4D1U4	A4D1U4	DEN11_HUMAN	DENN domain-containing protein 11	-0.0454555	-0.328561	0.128664	0.841931
MTMR11	A4FU01	A4FU01	MTMRB_HUMAN	Myotubularin-related protein 11	0.0848614	0.215688	0.080954	0.895095
VPS37C	A5D8V6	A5D8V6	VP37C_HUMAN	Vacuolar protein sorting-associated protein 37C	0.053573	0.470888	0.194246	0.767844
TRAPPC13	A5PLN9	A5PLN9	TPC13_HUMAN	Trafficking protein particle complex subunit 13	0.154912	1.63399	0.969281	0.214415
CNOT1	A5YKK6	A5YKK6	CNOT1_HUMAN	CCR4-NOT transcription complex subunit 1	-0.170258	-2.8153	2.18545	0.0203872
PALM3	A6NDB9	A6NDB9	PALM3_HUMAN	Paralemmin-3	0.146013	0.588163	0.252931	0.706711
PGP	A6NDG6	A6NDG6	PGP_HUMAN	Glycerol-3-phosphate phosphatase	0.0786582	0.574069	0.245653	0.713208
RIMOC1	A6NDU8	A6NDU8	RIMC1_HUMAN	RAB7A-interacting MON1-CCZ1 complex subunit 1	-0.0913171	-0.573885	0.245559	0.713223
CCDC160	A6NGH7	A6NGH7	CC160_HUMAN	Coiled-coil domain-containing protein 160	0.241684	2.14429	1.44445	0.0889992
TUBAL3	A6NHL2	A6NHL2	TBAL3_HUMAN	Tubulin alpha chain-like 3	-0.246073	-1.9268	1.23217	0.131764
SMCHD1	A6NHR9	A6NHR9	SMHD1_HUMAN	Structural maintenance of chromosomes flexible hinge domain-containing protein 1	-0.341335	-3.69302	3.32767	0.00183925
UNC119B	A6NIH7	A6NIH7;Q13432	U119B_HUMAN	Protein unc-119 homolog B	-0.608948	-5.69233	6.43632	0
METTL15	A6NJ78	A6NJ78	MET15_HUMAN	12S rRNA N4-methylcytidine (m4C) methyltransferase	-0.0262899	-0.256056	0.0975861	0.876044
LIPT2	A6NK58	A6NK58	LIPT2_HUMAN	Putative lipoyltransferase 2, mitochondrial	-0.410602	-2.19776	1.49881	0.0798705
CCDC85C	A6NKD9	A6NKD9	CC85C_HUMAN	Coiled-coil domain-containing protein 85C	0.163833	1.05723	0.530902	0.456882
COL6A6	A6NMZ7	A6NMZ7	CO6A6_HUMAN	Collagen alpha-6(VI) chain	0.437452	1.78711	1.10343	0.168505
LRRIQ3	A6PVS8	A6PVS8	LRIQ3_HUMAN	Leucine-rich repeat and IQ domain-containing protein 3	0.392482	1.42509	0.798203	0.287789
ZSWIM8	A7E2V4	A7E2V4	ZSWM8_HUMAN	Zinc finger SWIM domain-containing protein 8	0.141586	1.54723	0.896543	0.242291
ARHGAP32	A7KAX9	A7KAX9	RHG32_HUMAN	Rho GTPase-activating protein 32	0.14539	1.33938	0.732036	0.321332
POM121C	A8CG34	Q96HA1;A6NF01;A8CG34	P121C_HUMAN	Nuclear envelope pore membrane protein POM 121C	-0.136165	-2.76015	2.1199	0.0233358
A2ML1	A8K2U0	A8K2U0	A2ML1_HUMAN	Alpha-2-macroglobulin-like protein 1	0.918755	2.75148	2.10966	0.0238971
DDX11L8	A8MPP1	A8MPP1;Q96FC9;Q92771	D11L8_HUMAN	Putative ATP-dependent RNA helicase DDX11-like protein 8	-0.505814	-3.58185	3.17348	0.00268421
FAM171A2	A8MVW0	A8MVW0	F1712_HUMAN	Protein FAM171A2	-0.56869	-3.75765	3.41846	0.00147614
PHF20L1	A8MW92	A8MW92	P20L1_HUMAN	PHD finger protein 20-like protein 1	-0.383743	-1.52967	0.882113	0.248886
SNRPG;SNRPGP15	A8MWD9;P62308	A8MWD9;P62308	RUXGL_HUMAN;RUXG_HUMAN	Putative small nuclear ribonucleoprotein G-like protein 15	-0.518659	-4.81149	5.00147	2.42915e-05
NUDT19	A8MXV4	A8MXV4	NUD19_HUMAN	Acyl-coenzyme A diphosphatase NUDT19	-0.313424	-1.55875	0.906065	0.237997
MIF4GD	A9UHW6	A9UHW6	MI4GD_HUMAN	MIF4G domain-containing protein	0.383571	3.70957	3.35084	0.00172453
MYO1G	B0I1T2	B0I1T2	MYO1G_HUMAN	Unconventional myosin-Ig	0.029306	0.141408	0.0515842	0.931883
ESPN	B1AK53	B1AK53	ESPN_HUMAN	Espin	-0.349109	-1.45415	0.821171	0.276373
GPR89A;GPR89B	B7ZAQ6;P0CG08	P0CG08;B7ZAQ6	GPHRA_HUMAN;GPHRB_HUMAN	Golgi pH regulator A	-0.032438	-0.268219	0.102691	0.871231
HNRNPCL1;HNRNPCL3;HNRNPCL4	B7ZW38;O60812;P0DMR1	B7ZW38;O60812;P0DMR1	HNRC1_HUMAN;HNRC3_HUMAN;HNRC4_HUMAN	Heterogeneous nuclear ribonucleoprotein C-like 3	-0.483278	-4.45464	4.44589	0.000194234
IGLL5	B9A064	P0CF74;P0DOY2;B9A064;A0M8Q6;P0CG04	IGLL5_HUMAN	Immunoglobulin lambda-like polypeptide 5	-0.0894329	-0.328856	0.128793	0.841961
WASH2P;WASH3P	C4AMC7;Q6VEQ5	C4AMC7;A8K0Z3;Q6VEQ5;Q9NQA3;A8MWX3	WASH2_HUMAN;WASH3_HUMAN	Putative WAS protein family homolog 3	0.0790517	1.0291	0.51225	0.469332
MCRIP1	C9JLW8	C9JLW8	MCRI1_HUMAN	Mapk-regulated corepressor-interacting protein 1	-0.55132	-5.15488	5.55137	1.10193e-05
CFAP99	D6REC4	D6REC4	CFA99_HUMAN	Cilia- and flagella-associated protein 99	-1.10667	-4.36301	4.30618	0.000242595
NACA	E9PAV3	E9PAV3	NACAM_HUMAN	Nascent polypeptide-associated complex subunit alpha, muscle-specific form	-0.134424	-1.28924	0.694424	0.343134
C11orf98	E9PRG8	E9PRG8	CK098_HUMAN	Uncharacterized protein C11orf98	0.148707	1.02769	0.511325	0.470069
CROCC2	H7BZ55	H7BZ55	CRCC2_HUMAN	Ciliary rootlet coiled-coil protein 2	0.389242	1.01836	0.505201	0.47521
ASDURF	L0R819	L0R819	ASURF_HUMAN	ASNSD1 upstream open reading frame protein	-0.124221	-1.05653	0.530433	0.456951
DNASE2	O00115	O00115	DNS2A_HUMAN	Deoxyribonuclease-2-alpha	0.29592	1.79407	1.1097	0.166451
AGPS	O00116	O00116	ADAS_HUMAN	Alkyldihydroxyacetonephosphate synthase, peroxisomal	-0.0360539	-0.249896	0.0950174	0.879496
KIF2A	O00139	O00139	KIF2A_HUMAN	Kinesin-like protein KIF2A	-0.208031	-1.83107	1.1433	0.157272
TK2	O00142	O00142	KITM_HUMAN	Thymidine kinase 2, mitochondrial	0.129776	0.712174	0.319639	0.637737
DDX39A	O00148	O00148	DX39A_HUMAN	ATP-dependent RNA helicase DDX39A	-0.448207	-2.43937	1.75478	0.0485184
PDLIM1	O00151	O00151	PDLI1_HUMAN	PDZ and LIM domain protein 1	-0.0893594	-0.499742	0.208291	0.753254
ACOT7	O00154	O00154	BACH_HUMAN	Cytosolic acyl coenzyme A thioester hydrolase	-0.0928873	-0.415973	0.168216	0.796976
MYO1C	O00159	O00159	MYO1C_HUMAN	Unconventional myosin-Ic	0.548789	3.5661	3.15184	0.00286463
MYO1F	O00160	O00160	MYO1F_HUMAN	Unconventional myosin-If	0.948992	3.41962	2.95312	0.00429712
SNAP23	O00161	O00161	SNP23_HUMAN	Synaptosomal-associated protein 23	0.307183	3.15175	2.60207	0.00879458
HAX1	O00165	O00165	HAX1_HUMAN	HCLS1-associated protein X-1	0.434058	3.84192	3.53806	0.00121399
EYA2	O00167	O00167	EYA2_HUMAN	Eyes absent homolog 2	-0.191939	-0.932984	0.450448	0.518667
FXYD1	O00168	O00168	PLM_HUMAN	Phospholemman	-2.5262	-7.16779	8.95812	0
AIP	O00170	O00170	AIP_HUMAN	AH receptor-interacting protein	-0.0442339	-0.452249	0.185308	0.77718
GTPBP1	O00178	O00178	GTPB1_HUMAN	GTP-binding protein 1	0.0779974	0.788342	0.36301	0.593922
LGALS9	O00182	O00182	LEG9_HUMAN	Galectin-9	0.625707	2.96489	2.3672	0.0141673
STXBP3	O00186	O00186	STXB3_HUMAN	Syntaxin-binding protein 3	0.194635	2.05732	1.35785	0.104532
AP4M1	O00189	O00189	AP4M1_HUMAN	AP-4 complex subunit mu-1	0.272963	2.70915	2.06	0.0262065
ARVCF	O00192	O00192	ARVC_HUMAN	Splicing regulator ARVCF	-0.449733	-2.93764	2.33367	0.0151106
SMAP	O00193	O00193	SMAP_HUMAN	Small acidic protein	-0.274573	-2.13473	1.43482	0.09033
AP3B1	O00203	Q13367;O00203	AP3B1_HUMAN	AP-3 complex subunit beta-1	0.0629095	0.653272	0.287353	0.670906
LGALS8	O00214	O00214	LEG8_HUMAN	Galectin-8	0.411341	2.65217	1.99388	0.029993
NDUFS8	O00217	O00217	NDUS8_HUMAN	NADH dehydrogenase [ubiquinone] iron-sulfur protein 8, mitochondrial	0.184447	1.48211	0.843523	0.265967
NFKBIE	O00221	O00221	IKBE_HUMAN	NF-kappa-B inhibitor epsilon	0.488974	3.80102	3.47985	0.00134002
PSMD11	O00231	O00231	PSD11_HUMAN	26S proteasome non-ATPase regulatory subunit 11	-0.173925	-2.35451	1.66296	0.0578452
PSMD12	O00232	O00232	PSD12_HUMAN	26S proteasome non-ATPase regulatory subunit 12	-0.153991	-1.91712	1.22306	0.134067
PSMD9	O00233	O00233	PSMD9_HUMAN	26S proteasome non-ATPase regulatory subunit 9	-0.102119	-1.23388	0.653833	0.367908
ATOX1	O00244	O00244	ATOX1_HUMAN	Copper transport protein ATOX1	0.292621	2.10049	1.40056	0.0966027
MEN1	O00255	O00255	MEN1_HUMAN	Menin	-0.468752	-4.26986	4.16551	0.000292165
CBX4	O00257	O00257	CBX4_HUMAN	E3 SUMO-protein ligase CBX4	-0.597483	-2.89672	2.28367	0.0167597
GET1	O00258	O00258	GET1_HUMAN	Guided entry of tail-anchored proteins factor 1	0.0872849	0.707657	0.317124	0.640499
PGRMC1	O00264	O00264	PGRC1_HUMAN	Membrane-associated progesterone receptor component 1	-0.0539064	-0.452578	0.185464	0.777032
SUPT5H	O00267	O00267	SPT5H_HUMAN	Transcription elongation factor SPT5	-0.347774	-2.53466	1.86031	0.039345
TAF4	O00268	O00268	TAF4_HUMAN	Transcription initiation factor TFIID subunit 4	-0.559102	-6.56868	7.92349	0
DFFA	O00273	O00273	DFFA_HUMAN	DNA fragmentation factor subunit alpha	-0.17297	-1.38995	0.770791	0.300825
RFXAP	O00287	O00287	RFXAP_HUMAN	Regulatory factor X-associated protein	-0.0259713	-0.303563	0.117773	0.854556
HIP1	O00291	O00291	HIP1_HUMAN	Huntingtin-interacting protein 1	-0.0980113	-0.881343	0.418464	0.546128
CLIC1	O00299	O00299	CLIC1_HUMAN	Chloride intracellular channel protein 1	0.231247	1.76917	1.08733	0.173376
EIF3F	O00303	O00303	EIF3F_HUMAN	Eukaryotic translation initiation factor 3 subunit F	-0.171288	-1.96575	1.26914	0.123517
WWP2	O00308	O00308	WWP2_HUMAN	NEDD4-like E3 ubiquitin-protein ligase WWP2	0.039608	0.229495	0.0865891	0.888267
PIK3CD	O00329	O00329	PK3CD_HUMAN	Phosphatidylinositol 4,5-bisphosphate 3-kinase catalytic subunit delta isoform	0.127432	0.815987	0.379207	0.580209
PDHX	O00330	O00330	ODPX_HUMAN	Pyruvate dehydrogenase protein X component, mitochondrial	0.0520987	0.418185	0.169247	0.796162
MATN2	O00339	O00339	MATN2_HUMAN	Matrilin-2	0.00599882	0.0286072	0.00998555	0.988844
QSOX1	O00391	O00391	QSOX1_HUMAN	Sulfhydryl oxidase 1	0.0705726	0.504128	0.210449	0.751685
DCTN6	O00399	O00399	DCTN6_HUMAN	Dynactin subunit 6	0.000905305	0.00391079	0.0013518	0.999164
SLC33A1	O00400	O00400	ACATN_HUMAN	Acetyl-coenzyme A transporter 1	0.0827687	0.792202	0.365257	0.592116
WASL	O00401	O00401	WASL_HUMAN	Actin nucleation-promoting factor WASL	0.0432284	0.622958	0.271162	0.688347
IPO5	O00410	O00410	IPO5_HUMAN	Importin-5	-0.412734	-3.08276	2.51436	0.0104322
POLRMT	O00411	O00411	RPOM_HUMAN	DNA-directed RNA polymerase, mitochondrial	-0.0361385	-0.231014	0.0872123	0.888436
EEF2K	O00418	O00418	EF2K_HUMAN	Eukaryotic elongation factor 2 kinase	0.453847	2.68952	2.03712	0.0274967
SAP18	O00422	O00422	SAP18_HUMAN	Histone deacetylase complex subunit SAP18	-0.528571	-4.80554	4.99207	2.40964e-05
EML1	O00423	O00423	EMAL1_HUMAN	Echinoderm microtubule-associated protein-like 1	-0.187099	-0.994138	0.489428	0.487337
IGF2BP3	O00425	O00425	IF2B3_HUMAN	Insulin-like growth factor 2 mRNA-binding protein 3	-0.730778	-1.19177	0.623615	0.388589
DNM1L	O00429	O00429	DNM1L_HUMAN	Dynamin-1-like protein	-0.0113188	-0.0922102	0.0330007	0.957497
RTCA	O00442	O00442	RTCA_HUMAN	RNA 3'-terminal phosphate cyclase	-0.144477	-1.44863	0.816788	0.278771
PIK3C2A	O00443	O00443	P3C2A_HUMAN	Phosphatidylinositol 4-phosphate 3-kinase C2 domain-containing subunit alpha	0.0653865	0.945018	0.458024	0.512775
PIK3R2	O00459	O00459	P85B_HUMAN	Phosphatidylinositol 3-kinase regulatory subunit beta	0.127766	1.00618	0.497248	0.481656
GOLIM4	O00461	O00461	GOLI4_HUMAN	Golgi integral membrane protein 4	-0.251403	-1.34457	0.735981	0.319014
MANBA	O00462	O00462	MANBA_HUMAN	Beta-mannosidase	0.0967415	0.7851	0.361127	0.595338
AGRN	O00468	O00468	AGRIN_HUMAN	Agrin	-0.0819514	-0.533588	0.225093	0.734297
PLOD2	O00469	O00469	PLOD2_HUMAN	Procollagen-lysine,2-oxoglutarate 5-dioxygenase 2	0.341898	1.33122	0.725862	0.324733
MEIS1	O00470	O00470;O14770	MEIS1_HUMAN	Homeobox protein Meis1	-1.10288	-8.77265	11.7384	0
EXOC5	O00471	O00471	EXOC5_HUMAN	Exocyst complex component 5	0.0614727	1.02281	0.508119	0.472649
BTN3A3	O00478	O00478	BT3A3_HUMAN	Butyrophilin subfamily 3 member A3	0.770881	4.24929	4.13463	0.000324607
HMGN4	O00479	O00479;P05204	HMGN4_HUMAN	High mobility group nucleosome-binding domain-containing protein 4	0.0608691	0.345736	0.136254	0.833126
NDUFA4	O00483	O00483	NDUA4_HUMAN	Cytochrome c oxidase subunit NDUFA4	0.328909	1.48537	0.846146	0.264836
PSMD14	O00487	O00487	PSDE_HUMAN	26S proteasome non-ATPase regulatory subunit 14	-0.182613	-2.29145	1.59607	0.0657781
ZNF593	O00488	O00488	ZN593_HUMAN	Zinc finger protein 593	-0.110098	-0.791347	0.364759	0.59233
BIN1	O00499	O00499	BIN1_HUMAN	Myc box-dependent-interacting protein 1	0.026919	0.202293	0.07554	0.901698
KPNA3	O00505	O00505	IMA4_HUMAN	Importin subunit alpha-4	-0.315006	-3.06384	2.49051	0.0109987
STK25	O00506	O00506	STK25_HUMAN	Serine/threonine-protein kinase 25	-0.00155832	-0.0150873	0.00523822	0.993426
BCL9	O00512	O00512	BCL9_HUMAN	B-cell CLL/lymphoma 9 protein	-0.398538	-4.73436	4.87992	4.64217e-05
LAD1	O00515	O00515	LAD1_HUMAN	Ladinin-1	0.316509	2.27664	1.58052	0.0677308
KRIT1	O00522	O00522	KRIT1_HUMAN	Krev interaction trapped protein 1	-0.0123291	-0.10651	0.0383313	0.950264
VWA5A	O00534	O00534	VMA5A_HUMAN	von Willebrand factor A domain-containing protein 5A	0.911847	3.76102	3.42321	0.00146875
PES1	O00541	O00541	PESC_HUMAN	Pescadillo homolog	-0.0682133	-0.623598	0.271501	0.688047
EBAG9	O00559	O00559	RCAS1_HUMAN	Receptor-binding cancer antigen expressed on SiSo cells	0.189231	1.12098	0.574107	0.424431
SDCBP	O00560	O00560	SDCB1_HUMAN	Syntenin-1	-0.100376	-0.581715	0.249594	0.709647
PITPNM1	O00562	O00562	PITM1_HUMAN	Membrane-associated phosphatidylinositol transfer protein 1	-0.0315088	-0.252887	0.0962631	0.877993
MPHOSPH10	O00566	O00566	MPP10_HUMAN	U3 small nucleolar ribonucleoprotein protein MPP10	-0.174861	-1.96352	1.26701	0.124036
NOP56	O00567	O00567	NOP56_HUMAN	Nucleolar protein 56	-0.219582	-1.55103	0.89968	0.241168
DDX3X	O00571	O15523;O00571	DDX3X_HUMAN	ATP-dependent RNA helicase DDX3X	-0.198337	-1.57034	0.915686	0.23446
RNASET2	O00584	O00584	RNT2_HUMAN	Ribonuclease T2	-0.130234	-0.493297	0.205132	0.757002
PODXL	O00592	O00592	PODXL_HUMAN	Podocalyxin	-0.717828	-2.40811	1.72072	0.0515708
PIR	O00625	O00625	PIR_HUMAN	Pirin	0.691837	2.80432	2.17234	0.0208777
KPNA4	O00629	O00629	IMA3_HUMAN	Importin subunit alpha-3	-0.461515	-4.64445	4.73921	7.85714e-05
TRIM38	O00635	O00635	TRI38_HUMAN	E3 ubiquitin-protein ligase TRIM38	0.238658	2.29422	1.59898	0.0654245
NFIB	O00712	O00712	NFIB_HUMAN	Nuclear factor 1 B-type	-0.394587	-2.84471	2.22074	0.0191008
PPP6C	O00743	O00743	PPP6_HUMAN	Serine/threonine-protein phosphatase 6 catalytic subunit	0.141909	1.40722	0.784212	0.29385
PIK3C2B	O00750	O00750	P3C2B_HUMAN	Phosphatidylinositol 4-phosphate 3-kinase C2 domain-containing subunit beta	0.213922	1.9312	1.23632	0.130749
MAN2B1	O00754	O00754	MA2B1_HUMAN	Lysosomal alpha-mannosidase	-0.162687	-1.39242	0.772708	0.299768
UBE2C	O00762	O00762	UBE2C_HUMAN	Ubiquitin-conjugating enzyme E2 C	-0.850367	-3.71562	3.35932	0.00170132
PDXK	O00764	O00764	PDXK_HUMAN	Pyridoxal kinase	0.219453	1.40639	0.783564	0.293897
ARID1A	O14497	O14497	ARI1A_HUMAN	AT-rich interactive domain-containing protein 1A	-0.630469	-7.11902	8.87361	0
ISLR	O14498	O14498	ISLR_HUMAN	Immunoglobulin superfamily containing leucine-rich repeat protein	-0.737316	-2.35677	1.66539	0.0575942
NEMP1	O14524	O14524	NEMP1_HUMAN	Nuclear envelope integral membrane protein 1	-0.418912	-2.95956	2.36063	0.0143618
TXNDC9	O14530	O14530	TXND9_HUMAN	Thioredoxin domain-containing protein 9	0.0357698	0.333224	0.130716	0.839367
DPYSL4	O14531	O14531	DPYL4_HUMAN	Dihydropyrimidinase-related protein 4	0.656301	2.21439	1.51588	0.0772744
TRAFD1	O14545	O14545	TRAD1_HUMAN	TRAF-type zinc finger domain-containing protein 1	-0.21316	-2.89955	2.28711	0.0166764
COX7A2L	O14548	O14548	COX7R_HUMAN	Cytochrome c oxidase subunit 7A-related protein, mitochondrial	0.662045	5.13818	5.52433	1.08992e-05
HSPB6	O14558	O14558	HSPB6_HUMAN	Heat shock protein beta-6	-1.37335	-3.81685	3.50234	0.00127642
NDUFAB1	O14561	O14561	ACPM_HUMAN	Acyl carrier protein, mitochondrial	-0.135513	-1.15106	0.594948	0.408487
UBFD1	O14562	O14562	UBFD1_HUMAN	Ubiquitin domain-containing protein UBFD1	-0.351793	-2.98753	2.39521	0.0132876
CIT	O14578	O14578	CTRO_HUMAN	Citron Rho-interacting kinase	-0.2835	-2.35074	1.65893	0.0582482
COPE	O14579	O14579	COPE_HUMAN	Coatomer subunit epsilon	0.314824	3.8022	3.48152	0.00134271
AP3D1	O14617	O14617	AP3D1_HUMAN	AP-3 complex subunit delta-1	0.0515974	0.597102	0.257578	0.702425
CCS	O14618	O14618	CCS_HUMAN	Copper chaperone for superoxide dismutase	0.225059	1.05963	0.532508	0.455551
ABLIM1	O14639	O14639	ABLM1_HUMAN	Actin-binding LIM protein 1	-0.0535146	-0.338738	0.133151	0.836188
DVL1	O14640	P54792;O14640	DVL1_HUMAN	Segment polarity protein dishevelled homolog DVL-1	0.110538	1.07634	0.543717	0.446319
DVL2	O14641	O14641	DVL2_HUMAN	Segment polarity protein dishevelled homolog DVL-2	-0.130998	-1.28823	0.693679	0.343394
CHD1	O14646	O14646	CHD1_HUMAN	Chromodomain-helicase-DNA-binding protein 1	-0.162428	-1.09947	0.559385	0.433982
CHD2	O14647	Q8TD26;Q9HCK8;Q3L8U1;O14647;Q9P2D1;O14646	CHD2_HUMAN	Chromodomain-helicase-DNA-binding protein 2	-0.228379	-4.06213	3.85691	0.000596532
GOSR2	O14653	O14653	GOSR2_HUMAN	Golgi SNAP receptor complex member 2	-0.0568834	-0.547696	0.232201	0.726519
TOR1A	O14656	O14656	TOR1A_HUMAN	Torsin-1A	-0.0684024	-0.509554	0.213126	0.747864
TOR1B	O14657	O14657	TOR1B_HUMAN	Torsin-1B	0.400287	1.95344	1.2574	0.126162
STX16	O14662	O14662	STX16_HUMAN	Syntaxin-16	0.119845	0.861618	0.406472	0.555009
ADAM10	O14672	O14672	ADA10_HUMAN	Disintegrin and metalloproteinase domain-containing protein 10	0.478175	4.58959	4.65391	9.45946e-05
ABCD4	O14678	O14678	ABCD4_HUMAN	Lysosomal cobalamin transporter ABCD4	0.321413	1.76457	1.08323	0.174571
EI24	O14681	O14681	EI24_HUMAN	Etoposide-induced protein 2.4 homolog	0.179009	1.77271	1.09051	0.172562
APAF1	O14727	O14727	APAF_HUMAN	Apoptotic protease-activating factor 1	-0.12107	-1.12722	0.578404	0.420924
IMPA2	O14732	O14732	IMPA2_HUMAN	Inositol monophosphatase 2	0.226453	0.938762	0.45408	0.516146
MAP2K7	O14733	O14733	MP2K7_HUMAN	Dual specificity mitogen-activated protein kinase kinase 7	-0.140886	-1.15113	0.594995	0.408536
ACOT8	O14734	O14734	ACOT8_HUMAN	Acyl-coenzyme A thioesterase 8	-0.057298	-0.433929	0.176626	0.787201
CDIPT	O14735	O14735	CDIPT_HUMAN	CDP-diacylglycerol--inositol 3-phosphatidyltransferase	-0.341669	-3.18615	2.64621	0.0080055
PDCD5	O14737	O14737	PDCD5_HUMAN	Programmed cell death protein 5	-0.338684	-1.83012	1.14243	0.157434
PRMT5	O14744	O14744	ANM5_HUMAN	Protein arginine N-methyltransferase 5	-0.0320786	-0.325749	0.127429	0.84359
NHERF1	O14745	O14745	NHRF1_HUMAN	Na(+)/H(+) exchange regulatory cofactor NHE-RF1	-0.185378	-0.987198	0.484944	0.490918
FPGT	O14772	O14772	FPGT_HUMAN	Fucose-1-phosphate guanylyltransferase	0.0258401	0.19036	0.0707604	0.908448
TPP1	O14773	O14773	TPP1_HUMAN	Tripeptidyl-peptidase 1	0.152079	0.87548	0.414887	0.548274
TCERG1	O14776	O14776	TCRG1_HUMAN	Transcription elongation regulator 1	-0.397694	-5.14044	5.52798	1.0929e-05
NDC80	O14777	O14777	NDC80_HUMAN	Kinetochore protein NDC80 homolog	-0.360549	-0.977329	0.478595	0.49562
TNPO2	O14787	O14787	TNPO2_HUMAN	Transportin-2	-0.579293	-5.07736	5.42606	1.03627e-05
APOL1	O14791	O14791	APOL1_HUMAN	Apolipoprotein L1	0.45088	2.42543	1.73956	0.0497513
UNC13B	O14795	O14795	UN13B_HUMAN	Protein unc-13 homolog B	0.286662	2.53096	1.85616	0.0396486
POLR3A	O14802	O14802	RPC1_HUMAN	DNA-directed RNA polymerase III subunit RPC1	-0.216031	-2.78264	2.14654	0.0221053
PSMA7	O14818	O14818	PSA7_HUMAN	Proteasome subunit alpha type-7	-0.0342744	-0.419409	0.169818	0.79566
SCAMP3	O14828	O14828	SCAM3_HUMAN	Secretory carrier-associated membrane protein 3	0.29399	2.34579	1.65365	0.0588729
PHYH	O14832	O14832	PAHX_HUMAN	Phytanoyl-CoA dioxygenase, peroxisomal	0.348754	1.66248	0.993683	0.205525
OPLAH	O14841	O14841	OPLA_HUMAN	5-oxoprolinase	0.674082	2.98417	2.39103	0.013396
BCKDK	O14874	O14874	BCKD_HUMAN	[3-methyl-2-oxobutanoate dehydrogenase [lipoamide]] kinase, mitochondrial	-0.381597	-2.83996	2.21502	0.019321
IFIT3	O14879	O14879	IFIT3_HUMAN	Interferon-induced protein with tetratricopeptide repeats 3	0.911653	3.48064	3.03534	0.0036755
MGST3	O14880	O14880	MGST3_HUMAN	Glutathione S-transferase 3, mitochondrial	-0.015923	-0.0952117	0.0341148	0.956337
GEMIN2	O14893	O14893	GEMI2_HUMAN	Gem-associated protein 2	-0.111573	-0.827537	0.386046	0.573797
IRF6	O14896	O14896	IRF6_HUMAN	Interferon regulatory factor 6	-0.519863	-3.1309	2.57544	0.00920961
TAX1BP3	O14907	O14907	TX1B3_HUMAN	Tax1-binding protein 3	0.125436	0.791387	0.364782	0.59242
GIPC1	O14908	Q8TF64;O14908	GIPC1_HUMAN	PDZ domain-containing protein GIPC1	-0.175821	-1.47233	0.835677	0.269584
IKBKB	O14920	O14920	IKKB_HUMAN	Inhibitor of nuclear factor kappa-B kinase subunit beta	-0.0965	-0.902549	0.431495	0.535021
RGS12	O14924	O14924	RGS12_HUMAN	Regulator of G-protein signaling 12	-0.537014	-2.92417	2.31716	0.0155647
TIMM23	O14925	O14925;Q5SRD1	TIM23_HUMAN	Mitochondrial import inner membrane translocase subunit Tim23	-0.196738	-1.5895	0.931685	0.228067
HAT1	O14929	O14929	HAT1_HUMAN	Histone acetyltransferase type B catalytic subunit	-0.341742	-2.03233	1.3334	0.109421
UBE2L6	O14933	O14933	UB2L6_HUMAN	Ubiquitin/ISG15-conjugating enzyme E2 L6	0.420636	2.18934	1.49019	0.0812186
CASK	O14936	O14936	CSKP_HUMAN	Peripheral plasma membrane protein CASK	0.109117	1.18521	0.618962	0.392014
PLD2	O14939	O14939	PLD2_HUMAN	Phospholipase D2	0.335104	3.28236	2.77118	0.0062601
UQCRQ	O14949	O14949	QCR8_HUMAN	Cytochrome b-c1 complex subunit 8	0.474127	2.88017	2.26357	0.0174971
MYL12A;MYL12B	O14950;P19105	P19105;O14950	ML12A_HUMAN;ML12B_HUMAN	Myosin regulatory light chain 12B	0.0745301	0.769673	0.35221	0.605149
HGS	O14964	O14964	HGS_HUMAN	Hepatocyte growth factor-regulated tyrosine kinase substrate	3.15394e-05	0.000420077	0.000145002	1
AURKA	O14965	O14965	AURKA_HUMAN	Aurora kinase A	-0.404845	-2.01781	1.31927	0.112543
RAB29	O14966	O14966	RAB7L_HUMAN	Ras-related protein Rab-7L1	0.285208	1.95451	1.25842	0.125952
VPS26C	O14972	O14972	VP26C_HUMAN	Vacuolar protein sorting-associated protein 26C	0.0687156	0.788199	0.362927	0.59381
PPP1R12A	O14974	O14974	MYPT1_HUMAN	Protein phosphatase 1 regulatory subunit 12A	-0.203144	-2.05717	1.35771	0.104532
GAK	O14976	O14976	GAK_HUMAN	Cyclin-G-associated kinase	0.20852	1.38637	0.768023	0.301979
HNRNPDL	O14979	O14979	HNRDL_HUMAN	Heterogeneous nuclear ribonucleoprotein D-like	-0.865575	-6.00875	6.96822	0
XPO1	O14980	O14980	XPO1_HUMAN	Exportin-1	-0.261454	-3.03216	2.45077	0.0118696
BTAF1	O14981	O14981	BTAF1_HUMAN	TATA-binding protein-associated factor 172	-0.357807	-4.37166	4.31932	0.000244666
ZNF609	O15014	O15014	ZN609_HUMAN	Zinc finger protein 609	-0.416675	-2.11127	1.41131	0.0945143
SPTBN2	O15020	O15020	SPTN2_HUMAN	Spectrin beta chain, non-erythrocytic 2	-0.130402	-0.878033	0.416443	0.547827
MAST4	O15021	O15021	MAST4_HUMAN	Microtubule-associated serine/threonine-protein kinase 4	0.0491942	0.305393	0.118564	0.853753
SEC16A	O15027	O15027	SC16A_HUMAN	Protein transport protein Sec16A	0.108288	0.972344	0.475399	0.498199
PLXNB2	O15031	O15031	PLXB2_HUMAN	Plexin-B2	0.344977	4.10278	3.91671	0.00053494
AREL1	O15033	O15033	AREL1_HUMAN	Apoptosis-resistant E3 ubiquitin protein ligase 1	-0.0595051	-0.511748	0.214211	0.746755
KHNYN	O15037	O15037	KHNYN_HUMAN	Protein KHNYN	-0.08982	-0.852032	0.400689	0.560514
TECPR2	O15040	O15040	TCPR2_HUMAN	Tectonin beta-propeller repeat-containing protein 2	-0.0213616	-0.281841	0.10846	0.864855
U2SURP	O15042	O15042	SR140_HUMAN	U2 snRNP-associated SURP motif-containing protein	-0.501032	-5.88342	6.75673	0
SETD1A	O15047	O15047	SET1A_HUMAN	Histone-lysine N-methyltransferase SETD1A	-0.575698	-7.46138	9.46749	0
N4BP3	O15049	O15049	N4BP3_HUMAN	NEDD4-binding protein 3	-0.263905	-1.44643	0.815044	0.279472
KIF3B	O15066	O15066	KIF3B_HUMAN	Kinesin-like protein KIF3B	-0.0727941	-0.874666	0.414391	0.548468
PFAS	O15067	O15067	PUR4_HUMAN	Phosphoribosylformylglycinamidine synthase	-0.240545	-1.99597	1.29814	0.116898
DCLK1	O15075	O15075	DCLK1_HUMAN	Serine/threonine-protein kinase DCLK1	-0.0813809	-0.218175	0.0819649	0.894451
CEP290	O15078	O15078	CE290_HUMAN	Centrosomal protein of 290 kDa	-0.324645	-1.64563	0.979217	0.210493
ANKRD28	O15084	Q8N8A2;O15084	ANR28_HUMAN	Serine/threonine-protein phosphatase 6 regulatory ankyrin repeat subunit A	-0.0722252	-0.889321	0.42335	0.542724
ARHGEF11	O15085	O15085	ARHGB_HUMAN	Rho guanine nucleotide exchange factor 11	0.0708961	1.03264	0.514583	0.467603
PRORP	O15091	O15091	MRPP3_HUMAN	Mitochondrial ribonuclease P catalytic subunit	-0.085133	-0.61513	0.267027	0.692764
CHUK	O15111	O15111	IKKA_HUMAN	Inhibitor of nuclear factor kappa-B kinase subunit alpha	-0.300301	-3.34653	2.85571	0.00531804
LSM1	O15116	O15116	LSM1_HUMAN	U6 snRNA-associated Sm-like protein LSm1	0.00740024	0.0491944	0.0173116	0.978424
NPC1	O15118	O15118	NPC1_HUMAN	NPC intracellular cholesterol transporter 1	0.123983	1.23411	0.654	0.367855
AGPAT2	O15120	O15120	PLCB_HUMAN	1-acyl-sn-glycerol-3-phosphate acyltransferase beta	0.0400683	0.148865	0.0544608	0.928601
DEGS1	O15121	O15121	DEGS1_HUMAN	Sphingolipid delta(4)-desaturase DES1	0.299679	1.85829	1.16828	0.1494
SCAMP1	O15126	O15126	SCAM1_HUMAN	Secretory carrier-associated membrane protein 1	0.0637234	0.55359	0.235189	0.724423
SCAMP2	O15127	O15127	SCAM2_HUMAN	Secretory carrier-associated membrane protein 2	0.63379	5.4311	6.00292	0
ARPC1B	O15143	O15143	ARC1B_HUMAN	Actin-related protein 2/3 complex subunit 1B	0.381206	4.17679	4.02634	0.000389513
ARPC2	O15144	O15144	ARPC2_HUMAN	Actin-related protein 2/3 complex subunit 2	0.171771	2.29612	1.60098	0.0651817
ARPC3	O15145	O15145	ARPC3_HUMAN	Actin-related protein 2/3 complex subunit 3	0.098956	1.13588	0.584394	0.416112
BET1	O15155	O15155	BET1_HUMAN	BET1 homolog	0.325628	3.08772	2.52064	0.0103249
POLR1C	O15160	O15160	RPAC1_HUMAN	DNA-directed RNA polymerases I and III subunit RPAC1	-0.0755427	-1.11412	0.569397	0.427742
TRIM24	O15164	O15164	TIF1A_HUMAN	Transcription intermediary factor 1-alpha	-0.503548	-5.22763	5.66957	1.17647e-05
PGRMC2	O15173	O15173	PGRC2_HUMAN	Membrane-associated progesterone receptor component 2	-0.00524163	-0.0506804	0.017845	0.977925
CETN3	O15182	O15182	CETN3_HUMAN	Centrin-3	-0.1656	-1.47258	0.835874	0.269603
EPHB6	O15197	O15197	EPHB6_HUMAN	Ephrin type-B receptor 6	0.0370156	0.235423	0.0890255	0.886077
RGL2	O15211	O15211	RGL2_HUMAN	Ral guanine nucleotide dissociation stimulator-like 2	0.322163	1.53366	0.885385	0.247776
PFDN6	O15212	O15212	PFD6_HUMAN	Prefoldin subunit 6	-0.0110109	-0.103345	0.0371467	0.952018
WDR46	O15213	O15213	WDR46_HUMAN	WD repeat-containing protein 46	-0.0328179	-0.390529	0.156466	0.811677
NKRF	O15226	O15226	NKRF_HUMAN	NF-kappa-B-repressing factor	-0.0515372	-0.536351	0.22648	0.732763
GNPAT	O15228	O15228	GNPAT_HUMAN	Dihydroxyacetone phosphate acyltransferase	0.103904	0.959907	0.467461	0.504385
LAMA5	O15230	O15230	LAMA5_HUMAN	Laminin subunit alpha-5	-0.331332	-1.80459	1.11921	0.163569
ZNF185	O15231	O15231	ZN185_HUMAN	Zinc finger protein 185	0.389787	2.80065	2.16796	0.0210547
CASC3	O15234	O15234	CASC3_HUMAN	Protein CASC3	-0.162689	-2.07225	1.37256	0.101584
MRPS12	O15235	O15235	RT12_HUMAN	Small ribosomal subunit protein uS12m	-0.0672465	-0.681584	0.302736	0.653644
ACOX3	O15254	O15254	ACOX3_HUMAN	Peroxisomal acyl-coenzyme A oxidase 3	0.569108	3.73904	3.39223	0.00153551
RER1	O15258	O15258	RER1_HUMAN	Protein RER1	0.34232	2.33843	1.6458	0.0596617
SURF4	O15260	O15260	SURF4_HUMAN	Surfeit locus protein 4	-0.117814	-0.644214	0.282485	0.676508
MAPK13	O15264	O15264	MK13_HUMAN	Mitogen-activated protein kinase 13	0.484864	2.65537	1.99757	0.029756
SPTLC1	O15269	O15269	SPTC1_HUMAN	Serine palmitoyltransferase 1	0.0630083	0.632771	0.276372	0.682815
SPTLC2	O15270	O15270	SPTC2_HUMAN	Serine palmitoyltransferase 2	-0.0530492	-0.568223	0.242653	0.715705
OGT	O15294	O15294	OGT1_HUMAN	UDP-N-acetylglucosamine--peptide N-acetylglucosaminyltransferase 110 kDa subunit	-0.205734	-3.14689	2.59586	0.0089027
PMM2	O15305	O15305	PMM2_HUMAN	Phosphomannomutase 2	0.545294	4.70144	4.82828	4.44444e-05
TM9SF1	O15321	O15321	TM9S1_HUMAN	Transmembrane 9 superfamily member 1	0.535351	4.42043	4.39358	0.000230428
MID1	O15344	O15344	TRI18_HUMAN	E3 ubiquitin-protein ligase Midline-1	0.464615	2.46672	1.78481	0.0456706
HMGB3	O15347	O15347	HMGB3_HUMAN	High mobility group protein B3	-0.861095	-4.50766	4.52729	0.000152381
PPM1G	O15355	O15355	PPM1G_HUMAN	Protein phosphatase 1G	-0.581117	-4.91068	5.15889	8.92857e-06
INPPL1	O15357	O15357	SHIP2_HUMAN	Phosphatidylinositol 3,4,5-trisphosphate 5-phosphatase 2	0.117488	1.46299	0.828211	0.273272
EIF3D	O15371	O15371	EIF3D_HUMAN	Eukaryotic translation initiation factor 3 subunit D	-0.151736	-1.75956	1.07875	0.176024
EIF3H	O15372	O15372	EIF3H_HUMAN	Eukaryotic translation initiation factor 3 subunit H	-0.0990874	-1.41817	0.792776	0.290194
HDAC3	O15379	O15379	HDAC3_HUMAN	Histone deacetylase 3	-0.417455	-6.34561	7.54115	0
NVL	O15381	O15381	NVL_HUMAN	Nuclear valosin-containing protein-like	-0.186348	-1.71434	1.03876	0.188845
BCAT2	O15382	O15382	BCAT2_HUMAN	Branched-chain-amino-acid aminotransferase, mitochondrial	0.256845	1.9471	1.25138	0.127355
IPO8	O15397	O15397	IPO8_HUMAN	Importin-8	-0.209825	-1.43326	0.804633	0.284658
STX7	O15400	O15400	STX7_HUMAN	Syntaxin-7	-0.0645294	-0.460961	0.189472	0.77421
TNRC18	O15417	O15417	TNC18_HUMAN	Trinucleotide repeat-containing gene 18 protein	-0.834795	-4.89064	5.12698	1.76211e-05
SLC16A3	O15427	O15427	MOT4_HUMAN	Monocarboxylate transporter 4	0.815775	3.224	2.69513	0.00721524
ABCC4	O15439	O15439	MRP4_HUMAN	ATP-binding cassette sub-family C member 4	0.529215	2.74372	2.10053	0.0242641
POLR1G	O15446	O15446	RPA34_HUMAN	DNA-directed RNA polymerase I subunit RPA34	-0.0900328	-0.702885	0.314475	0.6423
P4HA2	O15460	O15460	P4HA2_HUMAN	Prolyl 4-hydroxylase subunit alpha-2	0.355442	1.84363	1.15479	0.153456
CAPN5	O15484	O15484	CAN5_HUMAN	Calpain-5	0.0596868	0.245217	0.0930737	0.881671
YKT6	O15498	O15498	YKT6_HUMAN	Synaptobrevin homolog YKT6	0.103026	1.32337	0.719943	0.327766
NUP42	O15504	O15504	NUP42_HUMAN	Nucleoporin NUP42	-0.216943	-2.34512	1.65294	0.0589618
ARPC5	O15511	O15511	ARPC5_HUMAN	Actin-related protein 2/3 complex subunit 5	0.146065	1.62129	0.958486	0.218543
POLR2D	O15514	O15514	RPB4_HUMAN	DNA-directed RNA polymerase II subunit RPB4	-0.180342	-2.63637	1.9757	0.0312156
PDPK1	O15530	O15530	PDPK1_HUMAN	3-phosphoinositide-dependent protein kinase 1	-0.127005	-1.27269	0.682188	0.350533
TAPBP	O15533	O15533	TPSN_HUMAN	Tapasin	1.09745	4.84532	5.05502	2.51572e-05
KDM6A	O15550	O14607;O15550	KDM6A_HUMAN	Lysine-specific demethylase 6A	-0.247145	-2.72582	2.0795	0.0253797
CLDN3	O15551	P56747;O14493;O15551;O95484	CLD3_HUMAN	Claudin-3	0.267991	2.04057	1.34144	0.107687
DHX15	O43143	O43143	DHX15_HUMAN	ATP-dependent RNA helicase DHX15	-0.473369	-4.8951	5.13408	1.766e-05
RNMT	O43148	O43148	MCES_HUMAN	mRNA cap guanine-N7 methyltransferase	-0.504882	-4.19975	4.06053	0.000364557
ZZEF1	O43149	O43149	ZZEF1_HUMAN	Zinc finger ZZ-type and EF-hand domain-containing protein 1	0.400845	4.71213	4.84503	4.49438e-05
ASAP2	O43150	O43150	ASAP2_HUMAN	Arf-GAP with SH3 domain, ANK repeat and PH domain-containing protein 2	-0.319681	-2.16918	1.46965	0.0845025
TTI1	O43156	O43156	TTI1_HUMAN	TELO2-interacting protein 1 homolog	-0.327404	-2.93276	2.32769	0.0152839
PLXNB1	O43157	O43157	PLXB1_HUMAN	Plexin-B1	-0.0272573	-0.349399	0.137884	0.832106
RRP8	O43159	O43159	RRP8_HUMAN	Ribosomal RNA-processing protein 8	-0.0243131	-0.23504	0.0888678	0.886112
SIPA1L1	O43166	O43166	SI1L1_HUMAN	Signal-induced proliferation-associated 1-like protein 1	0.113147	1.771	1.08897	0.172906
CYB5B	O43169	O43169	CYB5B_HUMAN	Cytochrome b5 type B	0.127123	0.698662	0.312136	0.644813
PRPF4	O43172	O43172	PRP4_HUMAN	U4/U6 small nuclear ribonucleoprotein Prp4	-0.469668	-4.84242	5.05042	2.50522e-05
PHGDH	O43175	O43175	SERA_HUMAN	D-3-phosphoglycerate dehydrogenase	-0.833788	-3.77934	3.44911	0.00143083
NDUFS4	O43181	O43181	NDUS4_HUMAN	NADH dehydrogenase [ubiquinone] iron-sulfur protein 4, mitochondrial	0.243624	1.62736	0.963642	0.216274
PHF1	O43189	O43189	PHF1_HUMAN	PHD finger protein 1	0.0347125	0.206387	0.077189	0.89951
GPR39	O43194	O43194	GPR39_HUMAN	G-protein coupled receptor 39	0.633906	2.94834	2.34682	0.0146635
DYNC1LI2	O43237	O43237	DC1L2_HUMAN	Cytoplasmic dynein 1 light intermediate chain 2	0.113184	0.817878	0.380323	0.579146
PSMD3	O43242	O43242	PSMD3_HUMAN	26S proteasome non-ATPase regulatory subunit 3	-0.175965	-2.13931	1.43943	0.0896604
RBFOX2	O43251	O43251	RFOX2_HUMAN	RNA binding protein fox-1 homolog 2	-0.463269	-6.00767	6.96639	0
PAPSS1	O43252	O43252	PAPS1_HUMAN	Bifunctional 3'-phosphoadenosine 5'-phosphosulfate synthase 1	-0.0946019	-0.606152	0.262309	0.696403
ZW10	O43264	O43264	ZW10_HUMAN	Centromere/kinetochore protein zw10 homolog	0.00452791	0.0632437	0.0223789	0.97136
SPINT1	O43278	O43278	SPIT1_HUMAN	Kunitz-type protease inhibitor 1	0.362204	2.81758	2.18818	0.0202835
B4GALT5	O43286	O43286	B4GT5_HUMAN	Beta-1,4-galactosyltransferase 5	0.565837	2.84423	2.22016	0.0191239
SART1	O43290	O43290	SNUT1_HUMAN	U4/U6.U5 tri-snRNP-associated protein 1	-0.334129	-4.58612	4.64853	9.42761e-05
SPINT2	O43291	O43291	SPIT2_HUMAN	Kunitz-type protease inhibitor 2	0.0760409	0.346226	0.136472	0.833121
GPAA1	O43292	O43292	GPAA1_HUMAN	Glycosylphosphatidylinositol anchor attachment 1 protein	0.0696908	0.526559	0.221575	0.738577
DAPK3	O43293	O43293	DAPK3_HUMAN	Death-associated protein kinase 3	-0.54608	-3.94835	3.69105	0.000877838
TGFB1I1	O43294	O43294	TGFI1_HUMAN	Transforming growth factor beta-1-induced transcript 1 protein	-0.136757	-0.413696	0.167157	0.798331
SRGAP3	O43295	O43295	SRGP3_HUMAN	SLIT-ROBO Rho GTPase-activating protein 3	-0.243555	-2.70986	2.06083	0.0261475
AP5Z1	O43299	O43299	AP5Z1_HUMAN	AP-5 complex subunit zeta-1	0.185656	1.60062	0.941024	0.224501
HSPA12A	O43301	O43301	HS12A_HUMAN	Heat shock 70 kDa protein 12A	-0.238354	-0.780538	0.358482	0.597968
PPIP5K2	O43314	Q6PFW1;O43314	VIP2_HUMAN	Inositol hexakisphosphate and diphosphoinositol-pentakisphosphate kinase 2	0.0334829	0.411218	0.166005	0.799632
MAP3K7	O43318	O43318	M3K7_HUMAN	Mitogen-activated protein kinase kinase kinase 7	-0.256113	-2.44727	1.76343	0.0476344
EEF1E1	O43324	O43324	MCA3_HUMAN	Eukaryotic translation elongation factor 1 epsilon-1	-0.181291	-1.6068	0.946228	0.222498
MSI1	O43347	O43347	MSI1H_HUMAN	RNA-binding protein Musashi homolog 1	-2.32945	-9.88392	13.6311	0
RIPK2	O43353	O43353	RIPK2_HUMAN	Receptor-interacting serine/threonine-protein kinase 2	0.485131	2.48655	1.80671	0.0436893
HNRNPR	O43390	O43390	HNRPR_HUMAN	Heterogeneous nuclear ribonucleoprotein R	-0.727206	-7.1462	8.92071	0
PRPF3	O43395	O43395	PRPF3_HUMAN	U4/U6 small nuclear ribonucleoprotein Prp3	-0.374705	-4.25736	4.14673	0.000305665
TXNL1	O43396	O43396	TXNL1_HUMAN	Thioredoxin-like protein 1	0.0242643	0.20761	0.0776825	0.898797
TPD52L2	O43399	O43399	TPD54_HUMAN	Tumor protein D54	0.164263	1.10188	0.561026	0.432672
EMC8	O43402	O43402	EMC8_HUMAN	ER membrane protein complex subunit 8	0.0437221	0.671053	0.296985	0.65957
ERI3	O43414	O43414	ERI3_HUMAN	ERI1 exoribonuclease 3	-0.274184	-2.14641	1.44659	0.0886351
THAP12	O43422	O43422	P52K_HUMAN	52 kDa repressor of the inhibitor of the protein kinase	-0.219398	-2.45094	1.76747	0.0472545
FIBP	O43427	O43427	FIBP_HUMAN	Acidic fibroblast growth factor intracellular-binding protein	-0.128061	-1.48142	0.842972	0.26612
EIF4G3	O43432	O43432	IF4G3_HUMAN	Eukaryotic translation initiation factor 4 gamma 3	-0.217425	-2.82886	2.2017	0.019757
PPIH	O43447	O43447	PPIH_HUMAN	Peptidyl-prolyl cis-trans isomerase H	-0.373559	-3.94134	3.68091	0.000904198
HTRA2	O43464	O43464;P83110	HTRA2_HUMAN	Serine protease HTRA2, mitochondrial	-0.203729	-1.53421	0.885841	0.247569
AKR7A2	O43488	O43488	ARK72_HUMAN	Aflatoxin B1 aldehyde reductase member 2	-0.0619322	-0.379051	0.151229	0.81812
EPB41L2	O43491	O43491	E41L2_HUMAN	Band 4.1-like protein 2	-0.122134	-0.590295	0.254037	0.705556
TGOLN2	O43493	O43493	TGON2_HUMAN	Trans-Golgi network integral membrane protein 2	0.328963	2.80176	2.16929	0.0209995
LAMTOR5	O43504	O43504	LTOR5_HUMAN	Ragulator complex protein LAMTOR5	0.0296118	0.327557	0.128223	0.842381
B4GAT1	O43505	O43505	B4GA1_HUMAN	Beta-1,4-glucuronyltransferase 1	0.143709	1.27429	0.683368	0.349872
WIPF1	O43516	O43516	WIPF1_HUMAN	WAS/WASL-interacting protein family member 1	0.657035	2.62155	1.95871	0.0324207
ATP8B1	O43520	O43520	AT8B1_HUMAN	Phospholipid-transporting ATPase IC	0.686005	3.86356	3.569	0.0011375
BCL2L11	O43521	O43521	B2L11_HUMAN	Bcl-2-like protein 11	-0.467706	-3.88683	3.60236	0.00105796
FOXO3	O43524	O43524	FOXO3_HUMAN	Forkhead box protein O3	-0.308656	-2.06508	1.36549	0.102949
CHST10	O43529	O43529	CHSTA_HUMAN	Carbohydrate sulfotransferase 10	-0.01162	-0.110711	0.0399086	0.947755
AKAP10	O43572	O43572	AKA10_HUMAN	A-kinase anchor protein 10, mitochondrial	0.0662483	0.625359	0.272434	0.686799
DENR	O43583	O43583	DENR_HUMAN	Density-regulated protein	-0.0498377	-0.485882	0.201513	0.761306
XPOT	O43592	O43592	XPOT_HUMAN	Exportin-T	-0.419358	-4.06212	3.85689	0.000595843
DNPH1	O43598	O43598	DNPH1_HUMAN	2'-deoxynucleoside 5'-phosphate N-hydrolase 1	0.0701333	0.340697	0.134018	0.835429
TIMM44	O43615	O43615	TIM44_HUMAN	Mitochondrial import inner membrane translocase subunit TIM44	-0.029727	-0.187262	0.0695266	0.909922
TRAPPC3	O43617	O43617	TPPC3_HUMAN	Trafficking protein particle complex subunit 3	0.218098	2.42237	1.73623	0.0499849
CHMP2A	O43633	O43633	CHM2A_HUMAN	Charged multivesicular body protein 2a	-0.0561027	-0.515253	0.215948	0.744736
NCK2	O43639	O43639	NCK2_HUMAN	Cytoplasmic protein NCK2	-0.340145	-4.04126	3.82631	0.000622426
PLRG1	O43660	O43660	PLRG1_HUMAN	Pleiotropic regulator 1	-0.32755	-4.33927	4.27019	0.00025
PRC1	O43663	O43663	PRC1_HUMAN	Protein regulator of cytokinesis 1	-0.397591	-1.52127	0.875244	0.251577
RGS10	O43665	O43665	RGS10_HUMAN	Regulator of G-protein signaling 10	-0.593418	-2.58544	1.91756	0.0351282
ZNF207	O43670	O43670	ZN207_HUMAN	BUB3-interacting and GLEBS motif-containing protein ZNF207	-0.460456	-4.42983	4.40793	0.000215247
NDUFB5	O43674	O43674	NDUB5_HUMAN	NADH dehydrogenase [ubiquinone] 1 beta subcomplex subunit 5, mitochondrial	0.279023	2.51652	1.84002	0.0409817
NDUFB3	O43676	O43676	NDUB3_HUMAN	NADH dehydrogenase [ubiquinone] 1 beta subcomplex subunit 3	0.117476	1.0708	0.539989	0.44914
NDUFA2	O43678	O43678	NDUA2_HUMAN	NADH dehydrogenase [ubiquinone] 1 alpha subcomplex subunit 2	0.379564	2.81008	2.17922	0.0206329
GET3	O43681	O43681	GET3_HUMAN	ATPase GET3	-0.285119	-2.20755	1.50885	0.0781847
BUB3	O43684	O43684	BUB3_HUMAN	Mitotic checkpoint protein BUB3	-0.484051	-5.15739	5.55545	1.10497e-05
ACTN4	O43707	O43707	ACTN4_HUMAN	Alpha-actinin-4	-0.118589	-0.878734	0.416871	0.547625
GSTZ1	O43708	O43708	MAAI_HUMAN	Maleylacetoacetate isomerase	0.0229965	0.147039	0.0537551	0.929549
BUD23	O43709	O43709	BUD23_HUMAN	Probable 18S rRNA (guanine-N(7))-methyltransferase	-0.184775	-2.0672	1.36758	0.102551
GATC	O43716	O43716	GATC_HUMAN	Glutamyl-tRNA(Gln) amidotransferase subunit C, mitochondrial	-0.325886	-2.29523	1.60005	0.0652825
HTATSF1	O43719	O43719	HTSF1_HUMAN	HIV Tat-specific factor 1	-0.293697	-2.98546	2.39264	0.0133455
KDELR3	O43731	O43731	ERD23_HUMAN	ER lumen protein-retaining receptor 3	0.307245	2.17583	1.47641	0.0834908
AP1G1	O43747	O43747	AP1G1_HUMAN	AP-1 complex subunit gamma-1	0.392675	4.68607	4.80421	5.15654e-05
STX6	O43752	O43752	STX6_HUMAN	Syntaxin-6	0.0786339	0.644971	0.282891	0.676108
SYNGR1	O43759	O43759	SNG1_HUMAN	Synaptogyrin-1	0.334456	1.47441	0.837346	0.268825
SYNGR2	O43760	O43760	SNG2_HUMAN	Synaptogyrin-2	0.848489	5.16611	5.56959	1.11111e-05
SGTA	O43765	O43765	SGTA_HUMAN	Small glutamine-rich tetratricopeptide repeat-containing protein alpha	-0.280554	-2.03051	1.33162	0.109773
ENSA	O43768	O43768;P56211	ENSA_HUMAN	Alpha-endosulfine	0.0807042	0.631992	0.275957	0.682931
SLC25A20	O43772	O43772	MCAT_HUMAN	Mitochondrial carnitine/acylcarnitine carrier protein	0.51461	2.85627	2.23466	0.0185932
NARS1	O43776	O43776	SYNC_HUMAN	Asparagine--tRNA ligase, cytoplasmic	-0.081285	-0.610893	0.264798	0.694552
MYO1B	O43795	O43795	MYO1B_HUMAN	Unconventional myosin-Ib	-0.58466	-3.02895	2.44676	0.0119449
SLC25A17	O43808	O43808	PM34_HUMAN	Peroxisomal membrane protein PMP34	-0.321247	-1.45902	0.825047	0.27453
NUDT21	O43809	O43809	CPSF5_HUMAN	Cleavage and polyadenylation specificity factor subunit 5	-0.502856	-4.71353	4.84723	4.51977e-05
LANCL1	O43813	O43813	LANC1_HUMAN	Glutathione S-transferase LANCL1	-0.538698	-4.06982	3.86819	0.000582072
STRN	O43815	O43815	STRN_HUMAN	Striatin	0.197342	2.81227	2.18183	0.020508
RRP9	O43818	O43818	U3IP2_HUMAN	U3 small nucleolar RNA-interacting protein 2	-0.215374	-2.24762	1.55025	0.0721523
CFAP410	O43822	O43822	CF410_HUMAN	Cilia- and flagella-associated protein 410	-0.0321355	-0.322164	0.125859	0.845397
AKAP8	O43823	O43823	AKAP8_HUMAN	A-kinase anchor protein 8	-0.264993	-3.14293	2.59079	0.00898855
GTPBP6	O43824	O43824	GTPB6_HUMAN	Putative GTP-binding protein 6	-0.268097	-2.01719	1.31867	0.112638
SLC37A4	O43826	O43826	G6PT1_HUMAN	Glucose-6-phosphate exchanger SLC37A4	-0.218622	-1.651	0.983818	0.208851
IDH3B	O43837	O43837	IDH3B_HUMAN	Isocitrate dehydrogenase [NAD] subunit beta, mitochondrial	0.348263	2.78386	2.14799	0.0220489
NRDC	O43847	O43847	NRDC_HUMAN	Nardilysin	0.0968724	1.07449	0.542471	0.447058
CALU	O43852	O43852	CALU_HUMAN	Calumenin	0.10892	0.803419	0.371814	0.586316
ATP9B	O43861	O43861	ATP9B_HUMAN	Probable phospholipid-transporting ATPase IIB	0.148748	0.754854	0.343716	0.613328
AHCYL1	O43865	O43865	SAHH2_HUMAN	S-adenosylhomocysteine hydrolase-like protein 1	0.214459	2.09066	1.39078	0.0982024
KIF1C	O43896	O43896	KIF1C_HUMAN	Kinesin-like protein KIF1C	0.0315995	0.305215	0.118487	0.853775
ORC5	O43913	O43913	ORC5_HUMAN	Origin recognition complex subunit 5	-0.440134	-7.10896	8.85619	0
NDUFS5	O43920	O43920	NDUS5_HUMAN	NADH dehydrogenase [ubiquinone] iron-sulfur protein 5	0.192777	1.57089	0.916143	0.2344
PDE6D	O43924	O43924	PDE6D_HUMAN	Retinal rod rhodopsin-sensitive cGMP 3',5'-cyclic phosphodiesterase subunit delta	-0.0521593	-0.495503	0.206212	0.755456
ORC4	O43929	Cont_Q2YDI2;O43929	ORC4_HUMAN	Origin recognition complex subunit 4	-0.452781	-7.99559	10.3949	0
PEX1	O43933	O43933	PEX1_HUMAN	Peroxisomal ATPase PEX1	0.130092	1.2303	0.651246	0.369473
RAD21	O60216	O60216	RAD21_HUMAN	Double-strand-break repair protein rad21 homolog	-0.319286	-4.038	3.82154	0.000634703
TIMM8A	O60220	O60220	TIM8A_HUMAN	Mitochondrial import inner membrane translocase subunit Tim8 A	0.0454591	0.311159	0.121063	0.850836
KALRN	O60229	O60229	KALRN_HUMAN	Kalirin	-0.259408	-1.85502	1.16527	0.150147
DHX16	O60231	O60231	DHX16_HUMAN	Pre-mRNA-splicing factor ATP-dependent RNA helicase DHX16	-0.138319	-1.33567	0.729232	0.322844
ZNRD2	O60232	O60232	ZNRD2_HUMAN	Protein ZNRD2	0.667953	4.37117	4.31858	0.000243972
HS6ST1	O60243	O60243	H6ST1_HUMAN	Heparan-sulfate 6-O-sulfotransferase 1	-0.151643	-1.23129	0.651959	0.369203
MED14	O60244	O60244	MED14_HUMAN	Mediator of RNA polymerase II transcription subunit 14	-0.294815	-3.77818	3.44747	0.00144379
PRPSAP2	O60256	O60256	KPRB_HUMAN	Phosphoribosyl pyrophosphate synthase-associated protein 2	-0.0551796	-0.544275	0.230471	0.727571
SMARCA5	O60264	O60264;P28370	SMCA5_HUMAN	SWI/SNF-related matrix-associated actin-dependent regulator of chromatin subfamily A member 5	-0.532059	-4.76752	4.93208	3.92927e-05
SPAG9	O60271	O60271	JIP4_HUMAN	C-Jun-amino-terminal kinase-interacting protein 4	0.118428	1.36831	0.754112	0.309138
KIF5C	O60282	O60282	KIF5C_HUMAN	Kinesin heavy chain isoform 5C	-0.351765	-1.93465	1.23959	0.129923
URB1	O60287	O60287	NPA1P_HUMAN	Nucleolar pre-ribosomal-associated protein 1	-0.178403	-2.55756	1.88604	0.0374808
SIPA1L3	O60292	O60292	SI1L3_HUMAN	Signal-induced proliferation-associated 1-like protein 3	-0.101081	-1.15251	0.595959	0.407735
LCMT2	O60294	O60294	TYW4_HUMAN	tRNA wybutosine-synthesizing protein 4	-0.0195743	-0.131304	0.0477113	0.936534
LZTS3	O60299	O60299	LZTS3_HUMAN	Leucine zipper putative tumor suppressor 3	0.347875	2.74354	2.10031	0.024264
AQR	O60306	O60306	AQR_HUMAN	RNA helicase aquarius	-0.455643	-5.6142	6.3061	0
OPA1	O60313	O60313	OPA1_HUMAN	Dynamin-like 120 kDa protein, mitochondrial	-0.118666	-0.938731	0.45406	0.516052
MCM3AP	O60318	O60318	GANP_HUMAN	Germinal-center associated nuclear protein	-0.163029	-3.70801	3.34865	0.00173095
KIF1B	O60333	O60333	KIF1B_HUMAN	Kinesin-like protein KIF1B	0.292407	3.25452	2.7348	0.00667531
KDM1A	O60341	O60341	KDM1A_HUMAN	Lysine-specific histone demethylase 1A	-0.592874	-7.15563	8.93706	0
TBC1D4	O60343	O60343	TBCD4_HUMAN	TBC1 domain family member 4	-0.368695	-2.03785	1.33878	0.10815
FZD6	O60353	O60353	FZD6_HUMAN	Frizzled-6	0.223851	1.64053	0.974858	0.212126
PPL	O60437	O60437	PEPL_HUMAN	Periplakin	0.0848073	0.366517	0.145556	0.823662
GSDME	O60443	O60443	GSDME_HUMAN	Gasdermin-E	-0.213445	-1.13288	0.582316	0.417513
MAN1A2	O60476	O60476	MA1A2_HUMAN	Mannosyl-oligosaccharide 1,2-alpha-mannosidase IB	0.332341	3.61723	3.22227	0.0023864
ACSL4	O60488	O60488	ACSL4_HUMAN	Long-chain-fatty-acid--CoA ligase 4	0.17207	1.2198	0.643665	0.374604
SNX3	O60493	O60493	SNX3_HUMAN	Sorting nexin-3	-0.0460786	-0.458318	0.188206	0.775533
STX10	O60499	O60499	STX10_HUMAN	Syntaxin-10	0.137408	1.17384	0.610928	0.396766
OGA	O60502	O60502	OGA_HUMAN	Protein O-GlcNAcase	-0.17767	-1.42341	0.796888	0.288475
SORBS3	O60504	O60504	VINEX_HUMAN	Vinexin	-0.496261	-2.23528	1.53745	0.0738802
SYNCRIP	O60506	O60506	HNRPQ_HUMAN	Heterogeneous nuclear ribonucleoprotein Q	-0.434987	-3.3926	2.91697	0.00461129
CDC40	O60508	O60508	PRP17_HUMAN	Pre-mRNA-processing factor 17	-0.357092	-4.40261	4.36641	0.000245974
B4GALT4	O60513	O60513	B4GT4_HUMAN	Beta-1,4-galactosyltransferase 4	0.129815	0.580584	0.24901	0.709913
RANBP6	O60518	O60518	RNBP6_HUMAN	Ran-binding protein 6	-0.37313	-1.72917	1.05181	0.18408
NEMF	O60524	O60524	NEMF_HUMAN	Ribosome quality control complex subunit NEMF	-0.0612746	-0.755183	0.343903	0.613169
GMDS	O60547	O60547	GMDS_HUMAN	GDP-mannose 4,6 dehydratase	0.5635	3.76133	3.42366	0.00147162
NMT2	O60551	O60551	NMT2_HUMAN	Glycylpeptide N-tetradecanoyltransferase 2	-0.26344	-1.66236	0.99358	0.205521
CCNT1	O60563	O60563	CCNT1_HUMAN	Cyclin-T1	-0.171404	-0.783103	0.359968	0.596474
BUB1B	O60566	O60566	BUB1B_HUMAN	Mitotic checkpoint serine/threonine-protein kinase BUB1 beta	-0.441393	-1.67949	1.00838	0.199884
PLOD3	O60568	O60568	PLOD3_HUMAN	Multifunctional procollagen lysine hydroxylase and glycosyltransferase LH3	0.335626	2.25252	1.55535	0.071385
EIF4E2	O60573	O60573	IF4E2_HUMAN	Eukaryotic translation initiation factor 4E type 2	-0.21475	-3.33342	2.83836	0.00550795
DIAPH1	O60610	O60610	DIAP1_HUMAN	Protein diaphanous homolog 1	0.345416	3.19276	2.65474	0.00787552
SELENOF	O60613	O60613	SEP15_HUMAN	Selenoprotein F	-0.00928771	-0.101484	0.0364514	0.953066
TSPAN3	O60637	O60637	TSN3_HUMAN	Tetraspanin-3	0.125287	0.309624	0.120397	0.851741
EXOC3	O60645	O60645	EXOC3_HUMAN	Exocyst complex component 3	0.119418	2.23283	1.53492	0.0741596
PLIN3	O60664	O60664	PLIN3_HUMAN	Perilipin-3	0.12257	0.962126	0.468874	0.50304
RAD1	O60671	O60671	RAD1_HUMAN	Cell cycle checkpoint protein RAD1	-0.0624778	-0.290018	0.111949	0.860137
PRMT3	O60678	O60678	ANM3_HUMAN	Protein arginine N-methyltransferase 3	0.104323	0.988907	0.486047	0.489885
KPNA6	O60684	O60684	IMA7_HUMAN	Importin subunit alpha-7	-0.0439209	-0.355505	0.140611	0.828832
UGDH	O60701	O60701	UGDH_HUMAN	UDP-glucose 6-dehydrogenase	-0.181187	-0.946517	0.458971	0.512334
CTNND1	O60716	O60716	CTND1_HUMAN	Catenin delta-1	-0.00986236	-0.116735	0.0421785	0.944346
ICMT	O60725	O60725	ICMT_HUMAN	Protein-S-isoprenylcysteine O-methyltransferase	0.0856326	0.651307	0.286295	0.672225
EIF1B	O60739	O60739	EIF1B_HUMAN	Eukaryotic translation initiation factor 1b	-0.360588	-2.95755	2.35815	0.0144174
SNX2	O60749	Q13596;O60749	SNX2_HUMAN	Sorting nexin-2	0.133248	1.09939	0.559329	0.433844
DPM1	O60762	O60762	DPM1_HUMAN	Dolichol-phosphate mannosyltransferase subunit 1	-0.102463	-0.823554	0.383682	0.575951
USO1	O60763	O60763	USO1_HUMAN	General vesicular transport factor p115	0.33616	2.99959	2.41017	0.0129108
MRPS14	O60783	O60783	RT14_HUMAN	Small ribosomal subunit protein uS14m	0.0482379	0.385823	0.154314	0.81443
TOM1	O60784	O60784	TOM1_HUMAN	Target of Myb1 membrane trafficking protein	0.475996	3.85379	3.55502	0.0011772
H2BC10;H2BC12;H2BC14;H2BC15;H2BC18;H2BC5;H2BC9	O60814;P58876;P62807;Q5QNW6;Q93079;Q99877;Q99879	Q99879;P57053;Q5QNW6;Q16778;O60814;P62807;P23527;P06899;Q99880;Q99877;P33778;Q93079;Q8N257;Q96A08;P58876	H2B1C_HUMAN;H2B1D_HUMAN;H2B1H_HUMAN;H2B1K_HUMAN;H2B1M_HUMAN;H2B1N_HUMAN;H2B2F_HUMAN	Histone H2B type 1-K	-0.695538	-7.29621	9.18084	0
PFKFB2	O60825	O60825	F262_HUMAN	6-phosphofructo-2-kinase/fructose-2,6-bisphosphatase 2	0.343644	2.8046	2.17267	0.0208874
CCDC22	O60826	O60826	CCD22_HUMAN	Coiled-coil domain-containing protein 22	0.00947664	0.140035	0.0510559	0.932698
PQBP1	O60828	O60828	PQBP1_HUMAN	Polyglutamine-binding protein 1	-0.481456	-2.81814	2.18885	0.0202593
TIMM17B	O60830	O60830	TI17B_HUMAN	Mitochondrial import inner membrane translocase subunit Tim17-B	-0.567649	-2.00352	1.30543	0.115344
PRAF2	O60831	O60831	PRAF2_HUMAN	PRA1 family protein 2	-0.286767	-1.70655	1.03194	0.191345
DKC1	O60832	O60832	DKC1_HUMAN	H/ACA ribonucleoprotein complex subunit DKC1	-0.115828	-0.953505	0.463395	0.507845
EIF5B	O60841	O60841	IF2P_HUMAN	Eukaryotic translation initiation factor 5B	-0.117606	-1.19778	0.627893	0.385896
EDF1	O60869	O60869	EDF1_HUMAN	Endothelial differentiation-related factor 1	-0.314749	-2.62997	1.96836	0.0317541
KIN	O60870	O60870	KIN17_HUMAN	DNA/RNA-binding protein KIN17	-0.312258	-2.88675	2.27155	0.0171804
DIAPH2	O60879	O60879	DIAP2_HUMAN	Protein diaphanous homolog 2	0.134615	1.22476	0.647239	0.372285
DNAJA2	O60884	O60884	DNJA2_HUMAN	DnaJ homolog subfamily A member 2	-0.0948724	-0.766219	0.350224	0.607241
BRD4	O60885	Q15059;O60885	BRD4_HUMAN	Bromodomain-containing protein 4	-0.468273	-5.42645	5.99525	0
CUTA	O60888	O60888	CUTA_HUMAN	Protein CutA	-0.0891393	-0.731916	0.330704	0.62698
OPHN1	O60890	O60890	OPHN1_HUMAN	Oligophrenin-1	0.0995566	0.501181	0.208998	0.752468
SMPD2	O60906	O60906	NSMA_HUMAN	Sphingomyelin phosphodiesterase 2	-0.0192797	-0.153274	0.0561693	0.927275
PFDN1	O60925	O60925	PFD1_HUMAN	Prefoldin subunit 1	0.0234324	0.275264	0.105668	0.868507
PPP1R11	O60927	O60927	PP1RB_HUMAN	E3 ubiquitin-protein ligase PPP1R11	0.175313	1.90084	1.20779	0.13813
NBN	O60934	O60934	NBN_HUMAN	Nibrin	-0.352293	-2.81524	2.18538	0.0203803
DTNB	O60941	O60941	DTNB_HUMAN	Dystrobrevin beta	-0.0626337	-0.273956	0.105114	0.8695
RNGTT	O60942	O60942	MCE1_HUMAN	mRNA-capping enzyme	-0.495588	-3.32331	2.82501	0.00564706
ABCB7	O75027	O75027	ABCB7_HUMAN	Iron-sulfur clusters transporter ABCB7, mitochondrial	-0.0581993	-0.3934	0.157782	0.809966
SRGAP2	O75044	O75044;Q7Z6B7	SRGP2_HUMAN	SLIT-ROBO Rho GTPase-activating protein 2	-0.390187	-3.33845	2.84503	0.00543598
NOS1AP	O75052	O75052	CAPON_HUMAN	Carboxyl-terminal PDZ ligand of neuronal nitric oxide synthase protein	-0.165392	-0.898051	0.428719	0.537471
IGSF3	O75054	O75054	IGSF3_HUMAN	Immunoglobulin superfamily member 3	-0.235783	-1.64236	0.976429	0.211643
FAM20B	O75063	O75063	XYLK_HUMAN	Glycosaminoglycan xylosylkinase	-0.106208	-0.925281	0.445623	0.522758
DENND4B	O75064	O75064	DEN4B_HUMAN	DENN domain-containing protein 4B	0.0532061	0.611142	0.264928	0.694475
EFCAB14	O75071	O75071	EFC14_HUMAN	EF-hand calcium-binding domain-containing protein 14	-0.259695	-1.28263	0.689528	0.346031
WDR1	O75083	O75083	WDR1_HUMAN	WD repeat-containing protein 1	0.374373	2.88323	2.26728	0.0173264
FZD7	O75084	O75084	FZD7_HUMAN	Frizzled-7	-0.202545	-1.24835	0.664351	0.360819
ATP9A	O75110	O75110	ATP9A_HUMAN	Probable phospholipid-transporting ATPase IIA	0.122901	0.984335	0.483099	0.491948
N4BP1	O75113	O75113	N4BP1_HUMAN	NEDD4-binding protein 1	-0.0424257	-0.313332	0.122007	0.849792
ROCK2	O75116	O75116	ROCK2_HUMAN	Rho-associated protein kinase 2	-0.00265951	-0.0310682	0.0108551	0.987639
CLASP2	O75122	O75122	CLAP2_HUMAN	CLIP-associating protein 2	-0.297175	-2.43214	1.74688	0.0491227
PTCD1	O75127	O75127	PTCD1_HUMAN	Pentatricopeptide repeat-containing protein 1, mitochondrial	-0.0195983	-0.194024	0.0722235	0.906323
COBL	O75128	O75128	COBL_HUMAN	Protein cordon-bleu	0.0680866	0.448503	0.183524	0.779182
CPNE3	O75131	O75131	CPNE3_HUMAN	Copine-3	0.0288315	0.240814	0.0912504	0.883976
DEPDC5	O75140	O75140	DEPD5_HUMAN	GATOR complex protein DEPDC5	0.1077	0.819003	0.380988	0.578838
ATG13	O75143	O75143	ATG13_HUMAN	Autophagy-related protein 13	-0.0997745	-1.22932	0.650533	0.369941
ICOSLG	O75144	O75144	ICOSL_HUMAN	ICOS ligand	-0.258302	-1.59081	0.932782	0.227707
HIP1R	O75146	O75146	HIP1R_HUMAN	Huntingtin-interacting protein 1-related protein	-0.392411	-2.16884	1.4693	0.0845319
OBSL1	O75147	O75147	OBSL1_HUMAN	Obscurin-like protein 1	-0.57321	-5.24781	5.70244	1.20482e-05
RNF40	O75150	O75150	BRE1B_HUMAN	E3 ubiquitin-protein ligase BRE1B	-0.430901	-4.70952	4.84094	4.46927e-05
PHF2	O75151	O75151	PHF2_HUMAN	Lysine-specific demethylase PHF2	-0.504254	-3.32231	2.8237	0.00565185
ZC3H11A	O75152	O75152	ZC11A_HUMAN	Zinc finger CCCH domain-containing protein 11A	-0.428156	-4.38473	4.33918	0.000241727
CLUH	O75153	O75153	CLU_HUMAN	Clustered mitochondria protein homolog	0.20086	1.97546	1.27842	0.121663
CAND2	O75155	O75155	CAND2_HUMAN	Cullin-associated NEDD8-dissociated protein 2	-0.146614	-0.959903	0.467459	0.504279
TSC22D2	O75157	O75157	T22D2_HUMAN	TSC22 domain family protein 2	-0.313339	-2.21241	1.51384	0.0775472
KDM4A	O75164	O75164	KDM4A_HUMAN	Lysine-specific demethylase 4A	-0.225586	-2.5038	1.82586	0.0420549
DNAJC13	O75165	O75165	DJC13_HUMAN	DnaJ homolog subfamily C member 13	0.0335545	0.457692	0.187907	0.77513
PPP6R2	O75170	O75170	PP6R2_HUMAN	Serine/threonine-protein phosphatase 6 regulatory subunit 2	0.538569	4.61683	4.69622	9.04348e-05
CNOT3	O75175	O75175	CNOT3_HUMAN	CCR4-NOT transcription complex subunit 3	-0.191501	-2.54211	1.86866	0.0386914
ANKRD17	O75179	O75179	ANR17_HUMAN	Ankyrin repeat domain-containing protein 17	-0.237111	-2.54752	1.87473	0.0381856
SIN3B	O75182	O75182	SIN3B_HUMAN	Paired amphipathic helix protein Sin3b	-0.283369	-3.53731	3.11242	0.00311263
DNAJB6	O75190	O75190	DNJB6_HUMAN	DnaJ homolog subfamily B member 6	-0.191426	-1.74788	1.06836	0.17901
XYLB	O75191	O75191	XYLB_HUMAN	Xylulose kinase	0.219557	1.258	0.671399	0.35645
COQ9	O75208	O75208	COQ9_HUMAN	Ubiquinone biosynthesis protein COQ9, mitochondrial	-0.0206297	-0.154433	0.0566191	0.92674
GGCT	O75223	O75223	GGCT_HUMAN	Gamma-glutamylcyclotransferase	-0.0527639	-0.294516	0.113877	0.858429
NDUFS7	O75251	O75251	NDUS7_HUMAN	NADH dehydrogenase [ubiquinone] iron-sulfur protein 7, mitochondrial	0.180491	1.29836	0.701208	0.339216
NDUFS2	O75306	O75306	NDUS2_HUMAN	NADH dehydrogenase [ubiquinone] iron-sulfur protein 2, mitochondrial	0.236663	2.08319	1.38338	0.0997416
ZPR1	O75312	O75312	ZPR1_HUMAN	Zinc finger protein ZPR1	0.0163713	0.149315	0.054635	0.928397
USP12	O75317	O75317;P62068	UBP12_HUMAN	Ubiquitin carboxyl-terminal hydrolase 12	0.0286274	0.280493	0.107887	0.865727
NIPSNAP2	O75323	O75323	NIPS2_HUMAN	Protein NipSnap homolog 2	0.0867294	0.578743	0.24806	0.710646
CILP	O75339	O75339	CILP1_HUMAN	Cartilage intermediate layer protein 1	0.0783818	0.286336	0.110376	0.861954
PDCD6	O75340	O75340	PDCD6_HUMAN	Programmed cell death protein 6	0.242816	1.68982	1.01734	0.196864
TBCA	O75347	O75347	TBCA_HUMAN	Tubulin-specific chaperone A	-0.214905	-1.63862	0.973227	0.212925
ATP6V1G1	O75348	O75348	VATG1_HUMAN	V-type proton ATPase subunit G 1	0.0381969	0.247681	0.0940965	0.880594
VPS4B	O75351	O75351	VPS4B_HUMAN	Vacuolar protein sorting-associated protein 4B	0.102285	1.14678	0.591963	0.410426
MPDU1	O75352	O75352	MPU1_HUMAN	Mannose-P-dolichol utilization defect 1 protein	-0.0815906	-0.537709	0.227163	0.732166
ENTPD5	O75356	O75356	ENTP5_HUMAN	Nucleoside diphosphate phosphatase ENTPD5	0.0304458	0.194299	0.0723337	0.906229
ZNF217	O75362	O75362	ZN217_HUMAN	Zinc finger protein 217	-0.0779713	-0.643456	0.282079	0.676882
MACROH2A1	O75367	O75367	H2AY_HUMAN	Core histone macro-H2A.1	-0.501758	-3.71883	3.36383	0.00166887
SH3BGRL	O75368	O75368	SH3L1_HUMAN	Adapter SH3BGRL	-0.0402701	-0.317926	0.124008	0.847178
FLNB	O75369	O75369	FLNB_HUMAN	Filamin-B	0.0489847	0.319028	0.124489	0.846689
NCOR1	O75376	O75376;Q9Y618	NCOR1_HUMAN	Nuclear receptor corepressor 1	-0.362023	-5.36282	5.89061	0
NDUFS6	O75380	O75380	NDUS6_HUMAN	NADH dehydrogenase [ubiquinone] iron-sulfur protein 6, mitochondrial	0.242806	2.19121	1.4921	0.0810288
PEX14	O75381	O75381	PEX14_HUMAN	Peroxisomal membrane protein PEX14	-0.190838	-2.04251	1.34333	0.107347
TRIM3	O75382	O75382	TRIM3_HUMAN	Tripartite motif-containing protein 3	0.174782	1.84661	1.15753	0.152524
TULP3	O75386	O75386	TULP3_HUMAN	Tubby-related protein 3	-0.154998	-1.00414	0.495916	0.482641
CS	O75390	O75390	CISY_HUMAN	Citrate synthase, mitochondrial	-0.198476	-1.42739	0.800008	0.286911
SPAG7	O75391	O75391	SPAG7_HUMAN	Sperm-associated antigen 7	-0.557462	-4.44036	4.42403	0.000205128
SEC22B	O75396	O75396	SC22B_HUMAN	Vesicle-trafficking protein SEC22b	0.241092	2.34427	1.65203	0.0590323
PRPF40A	O75400	O75400	PR40A_HUMAN	Pre-mRNA-processing factor 40 homolog A	-0.435301	-5.16242	5.56361	1.10803e-05
TACC1	O75410	O75410;O95359	TACC1_HUMAN	Transforming acidic coiled-coil-containing protein 1	0.969851	4.15159	3.98891	0.0004291
NME6	O75414	O75414	NDK6_HUMAN	Nucleoside diphosphate kinase 6	-0.341033	-2.36299	1.67205	0.0568457
GIGYF1	O75420	O75420	GGYF1_HUMAN	GRB10-interacting GYF protein 1	0.0115945	0.180294	0.0667609	0.913916
LRCH4	O75427	O75427	LRCH4_HUMAN	Leucine-rich repeat and calponin homology domain-containing protein 4	-0.0914433	-0.971466	0.474837	0.498558
MTX2	O75431	O75431	MTX2_HUMAN	Metaxin-2	-0.0366043	-0.353895	0.139891	0.829414
VPS26A	O75436	O75436	VP26A_HUMAN	Vacuolar protein sorting-associated protein 26A	-0.0447248	-0.370479	0.147344	0.822076
NDUFB1	O75438	O75438	NDUB1_HUMAN	NADH dehydrogenase [ubiquinone] 1 beta subcomplex subunit 1	0.243075	1.29802	0.700953	0.339243
PMPCB	O75439	O75439	MPPB_HUMAN	Mitochondrial-processing peptidase subunit beta	-0.359461	-2.81015	2.1793	0.020642
MED24	O75448	O75448	MED24_HUMAN	Mediator of RNA polymerase II transcription subunit 24	-0.292142	-4.043	3.82886	0.000618557
KATNA1	O75449	O75449	KTNA1_HUMAN	Katanin p60 ATPase-containing subunit A1	-0.15751	-1.26382	0.675666	0.354123
PSIP1	O75475	O75475	PSIP1_HUMAN	PC4 and SFRS1-interacting protein	-0.745592	-4.29528	4.20375	0.000275676
ERLIN1	O75477	O75477	ERLN1_HUMAN	Erlin-1	-0.234379	-1.61216	0.950756	0.220536
SUPT3H	O75486	O75486	SUPT3_HUMAN	Transcription initiation protein SPT3 homolog	-0.290529	-2.23398	1.53611	0.0740386
GPC4	O75487	O75487	GPC4_HUMAN	Glypican-4	-0.318356	-1.16015	0.601304	0.403869
NDUFS3	O75489	O75489	NDUS3_HUMAN	NADH dehydrogenase [ubiquinone] iron-sulfur protein 3, mitochondrial	0.188939	1.6194	0.956881	0.21897
SRSF10	O75494	O75494	SRS10_HUMAN	Serine/arginine-rich splicing factor 10	-0.44622	-5.14542	5.53605	1.09589e-05
CLN5	O75503	O75503	CLN5_HUMAN	Ceroid-lipofuscinosis neuronal protein 5	0.412601	2.14152	1.44166	0.0893794
HSBP1	O75506	O75506	HSBP1_HUMAN	Heat shock factor-binding protein 1	-0.256135	-2.18095	1.48162	0.0826521
ECI2	O75521	O75521	ECI2_HUMAN	Enoyl-CoA delta isomerase 2	-0.248773	-1.75028	1.0705	0.178482
KHDRBS3	O75525	O75525	KHDR3_HUMAN	KH domain-containing, RNA-binding, signal transduction-associated protein 3	-0.510276	-2.13748	1.43759	0.0898325
TAF5L	O75529	O75529	TAF5L_HUMAN	TAF5-like RNA polymerase II p300/CBP-associated factor-associated factor 65 kDa subunit 5L	-0.233834	-2.55748	1.88595	0.0374467
EED	O75530	O75530	EED_HUMAN	Polycomb protein EED	-0.250697	-2.90786	2.29724	0.0162865
BANF1	O75531	O75531	BAF_HUMAN	Barrier-to-autointegration factor	-0.250986	-2.14032	1.44045	0.0895939
SF3B1	O75533	O75533	SF3B1_HUMAN	Splicing factor 3B subunit 1	-0.500379	-6.24094	7.36249	0
CSDE1	O75534	O75534	CSDE1_HUMAN	Cold shock domain-containing protein E1	-0.126971	-1.36742	0.753426	0.309414
PRKRA	O75569	O75569	PRKRA_HUMAN	Interferon-inducible double-stranded RNA-dependent protein kinase activator A	-0.308335	-2.92435	2.31738	0.0155783
MTRF1	O75570	O75570	RF1M_HUMAN	Peptide chain release factor 1, mitochondrial	-0.186059	-1.36598	0.752324	0.309826
LRP6	O75581	O75581	LRP6_HUMAN	Low-density lipoprotein receptor-related protein 6	-0.188548	-1.35744	0.745785	0.313522
RPS6KA5	O75582	O75582	KS6A5_HUMAN	Ribosomal protein S6 kinase alpha-5	-0.154825	-1.10952	0.566242	0.429481
MED6	O75586	O75586	MED6_HUMAN	Mediator of RNA polymerase II transcription subunit 6	-0.522967	-5.53932	6.18177	0
MYCBP2	O75592	O75592	MYCB2_HUMAN	E3 ubiquitin-protein ligase MYCBP2	-0.154226	-2.13582	1.43592	0.0901636
GCAT	O75600	O75600	KBL_HUMAN	2-amino-3-ketobutyrate coenzyme A ligase, mitochondrial	-0.290271	-1.03924	0.518944	0.464872
NPM3	O75607	O75607	NPM3_HUMAN	Nucleoplasmin-3	0.0166868	0.100485	0.0360785	0.953607
LYPLA1	O75608	O75608	LYPA1_HUMAN	Acyl-protein thioesterase 1	0.126231	0.929961	0.448552	0.520061
ERAL1	O75616	O75616	ERAL1_HUMAN	GTPase Era, mitochondrial	-0.251258	-2.03808	1.33901	0.108126
SNRNP200	O75643	O75643	U520_HUMAN	U5 small nuclear ribonucleoprotein 200 kDa helicase	-0.471644	-5.91325	6.80697	0
TIPRL	O75663	O75663	TIPRL_HUMAN	TIP41-like protein	-0.0593284	-0.802974	0.371553	0.586554
OFD1	O75665	O75665	OFD1_HUMAN	Centriole and centriolar satellite protein OFD1	-0.247957	-1.37694	0.760747	0.30566
TOM1L1	O75674	O75674	TM1L1_HUMAN	TOM1-like protein 1	0.0456128	0.304499	0.118178	0.854138
RPS6KA4	O75676	O75676	KS6A4_HUMAN	Ribosomal protein S6 kinase alpha-4	0.0763249	0.635084	0.277604	0.681567
SURF6	O75683	O75683	SURF6_HUMAN	Surfeit locus protein 6	-0.0231503	-0.235099	0.088892	0.886198
PPM1B	O75688	O75688	PPM1B_HUMAN	Protein phosphatase 1B	0.106676	1.25475	0.669021	0.358012
ADAP1	O75689	O75689	ADAP1_HUMAN	Arf-GAP with dual PH domain-containing protein 1	-0.113654	-0.611356	0.265041	0.694571
UTP20	O75691	O75691	UTP20_HUMAN	Small subunit processome component 20 homolog	-0.301874	-2.98548	2.39267	0.0133513
NUP155	O75694	O75694	NU155_HUMAN	Nuclear pore complex protein Nup155	-0.263888	-4.47057	4.4703	0.000171779
RP2	O75695	O75695	XRP2_HUMAN	Protein XRP2	0.216863	1.29805	0.700976	0.339302
WDHD1	O75717	O75717	WDHD1_HUMAN	WD repeat and HMG-box DNA-binding protein 1	-0.358392	-2.51194	1.83491	0.0413876
CRTAP	O75718	O75718	CRTAP_HUMAN	Cartilage-associated protein	0.025141	0.212113	0.0795037	0.896408
SLC25A12	O75746	O75746	S2512_HUMAN	Electrogenic aspartate/glutamate antiporter SLC25A12, mitochondrial	-0.0874175	-0.551806	0.234283	0.725151
TCEA3	O75764	O75764	TCEA3_HUMAN	Transcription elongation factor A protein 3	0.359345	2.14231	1.44245	0.0892447
PALM	O75781	O75781	PALM_HUMAN	Paralemmin-1	-0.654697	-2.71518	2.06704	0.0259393
ATP6AP2	O75787	O75787	RENR_HUMAN	Renin receptor	0.235568	2.47099	1.78952	0.0451494
RNASEH2A	O75792	O75792	RNH2A_HUMAN	Ribonuclease H2 subunit A	-0.287935	-2.55513	1.88331	0.0376499
CDC123	O75794	O75794	CD123_HUMAN	Cell division cycle protein 123 homolog	0.144113	1.17894	0.614522	0.394259
POP7	O75817	O75817	POP7_HUMAN	Ribonuclease P protein subunit p20	-0.168048	-2.29364	1.59837	0.0654803
RPP40	O75818	O75818	RPP40_HUMAN	Ribonuclease P protein subunit p40	-0.375799	-3.95222	3.69665	0.000857143
EIF3G	O75821	O75821	EIF3G_HUMAN	Eukaryotic translation initiation factor 3 subunit G	-0.229223	-2.88026	2.26367	0.0175026
EIF3J	O75822	O75822	EIF3J_HUMAN	Eukaryotic translation initiation factor 3 subunit J	0.247666	2.68839	2.0358	0.0274959
CBR3	O75828	O75828	CBR3_HUMAN	Carbonyl reductase [NADPH] 3	0.849321	3.42406	2.95907	0.00427907
PSMD10	O75832	O75832	PSD10_HUMAN	26S proteasome non-ATPase regulatory subunit 10	0.0223129	0.269885	0.103394	0.87065
AP1G2	O75843	O75843	AP1G2_HUMAN	AP-1 complex subunit gamma-like 2	0.340715	1.47258	0.835874	0.269529
ZMPSTE24	O75844	O75844	FACE1_HUMAN	CAAX prenyl protease 1 homolog	0.295169	2.39475	1.70625	0.0529568
IDH1	O75874	O75874	IDHC_HUMAN	Isocitrate dehydrogenase [NADP] cytoplasmic	-0.0904082	-0.488226	0.202655	0.760113
GATB	O75879	O75879	GATB_HUMAN	Glutamyl-tRNA(Gln) amidotransferase subunit B, mitochondrial	-0.26947	-2.75646	2.11555	0.0235515
SCO1	O75880	O75880	SCO1_HUMAN	Protein SCO1 homolog, mitochondrial	-0.018195	-0.173035	0.0638947	0.917055
ATRN	O75882	O75882	ATRN_HUMAN	Attractin	0.0776454	0.704648	0.315453	0.641815
RBBP9	O75884	O75884	RBBP9_HUMAN	Serine hydrolase RBBP9	-0.362278	-2.46413	1.78196	0.0458819
STAM2	O75886	O75886	STAM2_HUMAN	Signal transducing adapter molecule 2	0.0873944	0.870277	0.411721	0.550473
TUSC2	O75896	O75896	TUSC2_HUMAN	Tumor suppressor candidate 2	0.196175	1.68093	1.00963	0.199612
DGAT1	O75907	O75907	DGAT1_HUMAN	Diacylglycerol O-acyltransferase 1	0.052559	0.369535	0.146918	0.822336
CCNK	O75909	O75909	CCNK_HUMAN	Cyclin-K	-0.206543	-2.3667	1.67603	0.0563823
DHRS3	O75911	O75911	DHRS3_HUMAN	Short-chain dehydrogenase/reductase 3	0.694343	2.10559	1.40564	0.0955701
ARL6IP5	O75915	O75915	PRAF3_HUMAN	PRA1 family protein 3	0.183793	1.11582	0.570564	0.426914
PIAS1	O75925	O75925	PIAS1_HUMAN	E3 SUMO-protein ligase PIAS1	-0.255029	-2.07039	1.37073	0.101968
PIAS2	O75928	Q9Y6X2;O75928	PIAS2_HUMAN	E3 SUMO-protein ligase PIAS2	-0.502198	-5.89212	6.77137	0
BCAS2	O75934	O75934	SPF27_HUMAN	Pre-mRNA-splicing factor SPF27	-0.404212	-4.52248	4.55014	0.0001472
DCTN3	O75935	O75935	DCTN3_HUMAN	Dynactin subunit 3	-0.0724649	-0.807739	0.374349	0.584397
BBOX1	O75936	O75936	BODG_HUMAN	Gamma-butyrobetaine dioxygenase	0.12046	0.379391	0.151384	0.818239
DNAJC8	O75937	O75937	DNJC8_HUMAN	DnaJ homolog subfamily C member 8	-0.546041	-5.3879	5.93182	0
SMNDC1	O75940	O75940	SPF30_HUMAN	Survival of motor neuron-related-splicing factor 30	-0.460882	-5.59359	6.27184	0
RAD17	O75943	O75943	RAD17_HUMAN	Cell cycle checkpoint protein RAD17	-0.166562	-1.34137	0.733549	0.32062
ATP5PD	O75947	O75947	ATP5H_HUMAN	ATP synthase subunit d, mitochondrial	0.138359	0.874257	0.414142	0.54857
FLOT1	O75955	O75955	FLOT1_HUMAN	Flotillin-1	0.129989	0.923571	0.444554	0.523663
TRIO	O75962	O75962	TRIO_HUMAN	Triple functional domain protein	-0.165368	-1.95539	1.25926	0.125819
ATP5MG	O75964	O75964	ATP5L_HUMAN	ATP synthase subunit g, mitochondrial	0.0994995	0.614608	0.266752	0.692823
MPDZ	O75970	O75970	MPDZ_HUMAN	Multiple PDZ domain protein	-0.499643	-2.879	2.26215	0.0175459
CPD	O75976	O75976	CBPD_HUMAN	Carboxypeptidase D	0.414179	2.4302	1.74476	0.0493125
GLRX3	O76003	O76003	GLRX3_HUMAN	Glutaredoxin-3	0.216926	1.44056	0.810396	0.281694
RSL1D1	O76021	O76021	RL1D1_HUMAN	Ribosomal L1 domain-containing protein 1	-0.0989706	-0.811013	0.376274	0.582242
WFS1	O76024	O76024	WFS1_HUMAN	Wolframin	-0.0166075	-0.0905274	0.0323772	0.958268
ANXA9	O76027	O76027	ANXA9_HUMAN	Annexin A9	0.58245	1.53125	0.883408	0.248355
CLPX	O76031	O76031	CLPX_HUMAN	ATP-dependent Clp protease ATP-binding subunit clpX-like, mitochondrial	-0.200907	-2.60519	1.94003	0.0336269
SEC14L2	O76054	O76054	S14L2_HUMAN	SEC14-like protein 2	0.302286	1.57143	0.916596	0.234216
TM7SF2	O76062	O76062	ERG24_HUMAN	Delta(14)-sterol reductase TM7SF2	-0.340382	-2.10071	1.40078	0.0965894
SNCG	O76070	O76070	SYUG_HUMAN	Gamma-synuclein	0.467083	1.03431	0.515688	0.466745
CIAO1	O76071	O76071	CIAO1_HUMAN	Probable cytosolic iron-sulfur protein assembly protein CIAO1	0.0428118	0.544333	0.230501	0.727778
DFFB	O76075	O76075	DFFB_HUMAN	DNA fragmentation factor subunit beta	0.0102288	0.0776121	0.0276182	0.964174
SRP72	O76094	O76094	SRP72_HUMAN	Signal recognition particle subunit SRP72	-0.0598593	-0.688709	0.306646	0.650731
DXO	O77932	O77932	DXO_HUMAN	Decapping and exoribonuclease protein	-0.160143	-1.47679	0.839254	0.267859
DDAH1	O94760	O94760	DDAH1_HUMAN	N(G),N(G)-dimethylarginine dimethylaminohydrolase 1	0.207067	1.123	0.5755	0.423216
RECQL5	O94762	O94762	RECQ5_HUMAN	ATP-dependent DNA helicase Q5	-0.199923	-2.44993	1.76635	0.0473902
URI1	O94763	O94763	RMP_HUMAN	Unconventional prefoldin RPB5 interactor 1	-0.232223	-2.15802	1.45833	0.086645
B3GAT3	O94766	Q9NPZ5;O94766	B3GA3_HUMAN	Galactosylgalactosylxylosylprotein 3-beta-glucuronosyltransferase 3	0.0898273	0.593264	0.25558	0.704177
STK17B	O94768	O94768	ST17B_HUMAN	Serine/threonine-protein kinase 17B	0.191928	1.61381	0.952154	0.22011
MTA2	O94776	O94776	MTA2_HUMAN	Metastasis-associated protein MTA2	-0.363582	-3.79431	3.47032	0.00135992
ALDH1A2	O94788	O94788	AL1A2_HUMAN	Retinal dehydrogenase 2	0.471604	1.57846	0.922452	0.232073
GFPT2	O94808	O94808	GFPT2_HUMAN	Glutamine--fructose-6-phosphate aminotransferase [isomerizing] 2	0.391772	2.44238	1.75808	0.0482751
LTN1	O94822	O94822	LTN1_HUMAN	E3 ubiquitin-protein ligase listerin	0.0988322	1.22905	0.650337	0.37001
TOMM70	O94826	O94826	TOM70_HUMAN	Mitochondrial import receptor subunit TOM70	-0.0566342	-0.427139	0.173434	0.790971
IPO13	O94829	O94829	IPO13_HUMAN	Importin-13	-0.148742	-1.65815	0.989958	0.206757
DDHD2	O94830	O94830	DDHD2_HUMAN	Phospholipase DDHD2	-0.174808	-1.26395	0.675758	0.35414
MYO1D	O94832	O94832	MYO1D_HUMAN	Unconventional myosin-Id	0.203901	2.21507	1.51658	0.0772472
TOX4	O94842	O94842	TOX4_HUMAN	TOX high mobility group box family member 4	-0.330056	-3.49182	3.05049	0.00355
MICAL2	O94851	O94851	MICA2_HUMAN	[F-actin]-monooxygenase MICAL2	-0.183001	-1.08579	0.550095	0.441224
SEC24D	O94855	O94855	SC24D_HUMAN	Protein transport protein Sec24D	0.234934	2.48907	1.8095	0.0435334
NFASC	O94856	O94856	NFASC_HUMAN	Neurofascin	0.112747	0.215441	0.0808535	0.895174
SUPT7L	O94864	O94864	ST65G_HUMAN	STAGA complex 65 subunit gamma	-0.270326	-2.3224	1.62876	0.0618092
FCHSD2	O94868	O94868	FCSD2_HUMAN	F-BAR and double SH3 domains protein 2	-0.114006	-0.920204	0.442454	0.525302
UFL1	O94874	Q92845;O94874	UFL1_HUMAN	E3 UFM1-protein ligase 1	0.0588048	0.515576	0.216108	0.744835
SORBS2	O94875	O94875	SRBS2_HUMAN	Sorbin and SH3 domain-containing protein 2	-0.132643	-0.483771	0.200485	0.761722
PHF14	O94880	O94880	PHF14_HUMAN	PHD finger protein 14	-0.247552	-2.71965	2.07227	0.025726
TMEM63A	O94886	O94886	CSCL1_HUMAN	CSC1-like protein 1	0.943304	5.27137	5.74088	1.23457e-05
FARP2	O94887	O94887	FARP2_HUMAN	FERM, ARHGEF and pleckstrin domain-containing protein 2	0.206508	1.75659	1.07611	0.176783
UBXN7	O94888	O94888	UBXN7_HUMAN	UBX domain-containing protein 7	-0.579257	-5.19513	5.61669	1.14613e-05
SUN1	O94901	O94901	SUN1_HUMAN	SUN domain-containing protein 1	-0.324149	-3.26605	2.74985	0.00649456
PLPBP	O94903	O94903	PLPHP_HUMAN	Pyridoxal phosphate homeostasis protein	-0.241478	-1.74682	1.06742	0.179299
ERLIN2	O94905	O94905	ERLN2_HUMAN	Erlin-2	-0.150946	-0.989683	0.486548	0.489547
PRPF6	O94906	O94906	PRP6_HUMAN	Pre-mRNA-processing factor 6	-0.477674	-4.63768	4.72867	8.51064e-05
PCF11	O94913	O94913	PCF11_HUMAN	Pre-mRNA cleavage complex 2 protein Pcf11	-0.107865	-1.611	0.949781	0.220985
FRYL	O94915	O94915	FRYL_HUMAN	Protein furry homolog-like	0.087573	1.05633	0.530301	0.456885
ENDOD1	O94919	O94919	ENDD1_HUMAN	Endonuclease domain-containing 1 protein	0.420159	2.5163	1.83978	0.0410019
GLCE	O94923	O94923	GLCE_HUMAN	D-glucuronyl C5-epimerase	0.462506	2.28901	1.5935	0.0661564
GLS	O94925	O94925	GLSK_HUMAN	Glutaminase kidney isoform, mitochondrial	-0.232804	-1.36239	0.749569	0.311526
HAUS5	O94927	O94927	HAUS5_HUMAN	HAUS augmin-like complex subunit 5	-0.144993	-0.971923	0.475129	0.498319
FBXO21	O94952	O94952	FBX21_HUMAN	F-box only protein 21	-0.71499	-3.69305	3.32771	0.00184097
KDM4B	O94953	O94953	KDM4B_HUMAN	Lysine-specific demethylase 4B	-0.330191	-2.49948	1.82106	0.0424671
SOGA1	O94964	O94964	SOGA1_HUMAN	Protein SOGA1	-0.147672	-1.50576	0.862628	0.257233
USP19	O94966	O94966	UBP19_HUMAN	Ubiquitin carboxyl-terminal hydrolase 19	-0.086403	-1.13895	0.586524	0.414395
AP2A2	O94973	O94973	AP2A2_HUMAN	AP-2 complex subunit alpha-2	0.129003	1.65636	0.988418	0.207101
SEC31A	O94979	O94979	SC31A_HUMAN	Protein transport protein Sec31A	0.400416	4.65517	4.75593	6.48649e-05
CLSTN1	O94985	O94985	CSTN1_HUMAN	Calsyntenin-1	-0.159759	-0.926251	0.44623	0.52208
HEXIM1	O94992	O94992	HEXI1_HUMAN	Protein HEXIM1	-0.177061	-1.34795	0.738548	0.317841
TJP3	O95049	O95049	ZO3_HUMAN	Tight junction protein ZO-3	0.586828	3.02679	2.44406	0.0120275
RPP14	O95059	O95059	RPP14_HUMAN	Ribonuclease P protein subunit p14	-0.123326	-1.28107	0.688374	0.346714
UBR5	O95071	O95071	UBR5_HUMAN	E3 ubiquitin-protein ligase UBR5	-0.286082	-5.33901	5.85156	0
AGFG2	O95081	O95081	AGFG2_HUMAN	Arf-GAP domain and FG repeat-containing protein 2	0.0174028	0.0797872	0.0284164	0.962858
SCAF4	O95104	O95104	SCAF4_HUMAN	SR-related and CTD-associated factor 4	-0.466096	-4.32422	4.24743	0.000263736
NDUFB6	O95139	O95139	NDUB6_HUMAN	NADH dehydrogenase [ubiquinone] 1 beta subcomplex subunit 6	0.828547	3.11772	2.55866	0.00954111
MFN2	O95140	O95140	MFN2_HUMAN	Mitofusin-2	-0.0834995	-0.888065	0.422579	0.543503
SNUPN	O95149	O95149	SPN1_HUMAN	Snurportin-1	0.106896	1.01465	0.50277	0.477296
UBE4B	O95155	O95155	UBE4B_HUMAN	Ubiquitin conjugation factor E4 B	-0.144582	-1.49467	0.853646	0.261491
ZFPL1	O95159	O95159	ZFPL1_HUMAN	Zinc finger protein-like 1	0.193177	1.5872	0.929758	0.228771
ELP1	O95163	O95163	ELP1_HUMAN	Elongator complex protein 1	-0.00200286	-0.0226163	0.00787571	0.990411
NDUFA3	O95167	O95167	NDUA3_HUMAN	NADH dehydrogenase [ubiquinone] 1 alpha subcomplex subunit 3	0.325183	2.71257	2.06399	0.026048
NDUFB4	O95168	O95168	NDUB4_HUMAN	NADH dehydrogenase [ubiquinone] 1 beta subcomplex subunit 4	0.208338	1.80303	1.1178	0.163979
NDUFB8	O95169	O95169	NDUB8_HUMAN	NADH dehydrogenase [ubiquinone] 1 beta subcomplex subunit 8, mitochondrial	0.379324	2.82799	2.20064	0.0197685
NDUFB2	O95178	O95178	NDUB2_HUMAN	NADH dehydrogenase [ubiquinone] 1 beta subcomplex subunit 2, mitochondrial	0.269968	2.02431	1.32558	0.111111
NDUFA7	O95182	O95182	NDUA7_HUMAN	NADH dehydrogenase [ubiquinone] 1 alpha subcomplex subunit 7	0.222879	1.98399	1.28661	0.119664
VAMP5	O95183	O95183	VAMP5_HUMAN	Vesicle-associated membrane protein 5	-0.474037	-1.44195	0.811494	0.281209
RTN3	O95197	O95197	RTN3_HUMAN	Reticulon-3	0.220625	1.77589	1.09335	0.171724
LETM1	O95202	O95202	LETM1_HUMAN	Mitochondrial proton/calcium exchanger protein	-0.345098	-1.77823	1.09545	0.171057
EPN2	O95208	O95208	EPN2_HUMAN	Epsin-2	-0.433622	-4.20244	4.06456	0.000365019
ZRANB2	O95218	O95218	ZRAB2_HUMAN	Zinc finger Ran-binding domain-containing protein 2	-0.422213	-4.9539	5.22784	9.34579e-06
SNX4	O95219	O95219	SNX4_HUMAN	Sorting nexin-4	0.171063	1.4009	0.779295	0.296288
ZWINT	O95229	O95229	ZWINT_HUMAN	ZW10 interactor	-0.153406	-0.850069	0.399509	0.560988
LUC7L3	O95232	O95232	LC7L3_HUMAN	Luc7-like protein 3	-0.539802	-5.08894	5.44473	1.04712e-05
KIF20A	O95235	O95235	KI20A_HUMAN	Kinesin-like protein KIF20A	-0.289375	-1.77035	1.08839	0.173107
KIF4A	O95239	O95239;Q2VIQ3	KIF4A_HUMAN	Chromosome-associated kinesin KIF4A	-0.422381	-2.19717	1.4982	0.079951
MBD4	O95243	O95243	MBD4_HUMAN	Methyl-CpG-binding domain protein 4	-0.300373	-3.25981	2.7417	0.0065896
SBF1	O95248	O95248	MTMR5_HUMAN	Myotubularin-related protein 5	0.323757	4.19769	4.05747	0.000364096
GOSR1	O95249	O95249	GOSR1_HUMAN	Golgi SNAP receptor complex member 1	0.0621566	0.502553	0.209674	0.752096
KAT7	O95251	O95251	KAT7_HUMAN	Histone acetyltransferase KAT7	-0.278801	-2.83471	2.20871	0.0194989
ATE1	O95260	O95260	ATE1_HUMAN	Arginyl-tRNA--protein transferase 1	-0.221207	-1.75446	1.07421	0.177139
VAPB	O95292	O95292	VAPB_HUMAN	Vesicle-associated membrane protein-associated protein B/C	-0.143827	-1.55781	0.90529	0.238334
RASAL1	O95294	O95294	RASL1_HUMAN	RasGAP-activating-like protein 1	-0.0326628	-0.156604	0.0574632	0.925202
SNAPIN	O95295	O95295	SNAPN_HUMAN	SNARE-associated protein Snapin	-0.003775	-0.0487786	0.0171625	0.978585
MPZL1	O95297	O95297	MPZL1_HUMAN	Myelin protein zero-like protein 1	0.0403316	0.302075	0.117131	0.854738
NDUFC2	O95298	O95298	NDUC2_HUMAN	NADH dehydrogenase [ubiquinone] 1 subunit C2	0.134408	1.5849	0.927832	0.229661
NDUFA10	O95299	O95299	NDUAA_HUMAN	NADH dehydrogenase [ubiquinone] 1 alpha subcomplex subunit 10, mitochondrial	0.171936	1.53201	0.884037	0.248244
FKBP9	O95302	O95302	FKBP9_HUMAN	Peptidyl-prolyl cis-trans isomerase FKBP9	-0.522712	-3.09985	2.53598	0.00999344
CELF2	O95319	O95319	CELF2_HUMAN	CUGBP Elav-like family member 2	0.0179951	0.0693	0.0245802	0.968344
PGLS	O95336	O95336	6PGL_HUMAN	6-phosphogluconolactonase	0.229998	1.42609	0.79899	0.28749
PAPSS2	O95340	O95340	PAPS2_HUMAN	Bifunctional 3'-phosphoadenosine 5'-phosphosulfate synthase 2	0.481087	2.09782	1.3979	0.0969394
SMC2	O95347	O95347	SMC2_HUMAN	Structural maintenance of chromosomes protein 2	-0.561556	-2.86422	2.24426	0.0182235
ATG7	O95352	O95352	ATG7_HUMAN	Ubiquitin-like modifier-activating enzyme ATG7	0.247077	2.4099	1.72267	0.0514185
TACC2	O95359	O95359	TACC2_HUMAN	Transforming acidic coiled-coil-containing protein 2	0.267927	2.01897	1.32039	0.112284
FARS2	O95363	O95363	SYFM_HUMAN	Phenylalanine--tRNA ligase, mitochondrial	-0.13347	-1.03311	0.514894	0.467379
LYPLA2	O95372	O95372	LYPA2_HUMAN	Acyl-protein thioesterase 2	-0.286227	-2.02563	1.32687	0.110822
IPO7	O95373	O95373	IPO7_HUMAN	Importin-7	-0.172173	-1.82685	1.13944	0.158359
ARIH2	O95376	O95376	ARI2_HUMAN	E3 ubiquitin-protein ligase ARIH2	-0.111042	-1.00122	0.49402	0.483579
SLU7	O95391	O95391	SLU7_HUMAN	Pre-mRNA-splicing factor SLU7	-0.166135	-1.20653	0.634146	0.381405
PGM3	O95394	O95394	AGM1_HUMAN	Phosphoacetylglucosamine mutase	0.0724023	0.527696	0.222143	0.738
MOCS3	O95396	O95396	MOCS3_HUMAN	Adenylyltransferase and sulfurtransferase MOCS3	-0.364091	-3.33282	2.83758	0.00551589
CD2BP2	O95400	O95400	CD2B2_HUMAN	CD2 antigen cytoplasmic tail-binding protein 2	-0.538881	-4.71841	4.85488	4.57143e-05
MED26	O95402	O95402	MED26_HUMAN	Mediator of RNA polymerase II transcription subunit 26	-0.242492	-2.48756	1.80783	0.043566
SVIL	O95425	O95425	SVIL_HUMAN	Supervillin	0.0505823	0.376559	0.150097	0.819289
PIGN	O95427	O95427	PIGN_HUMAN	GPI ethanolamine phosphate transferase 1	-0.153027	-1.26774	0.678543	0.352553
BAG4	O95429	O95429	BAG4_HUMAN	BAG family molecular chaperone regulator 4	-0.191117	-1.28902	0.694263	0.343082
AHSA1	O95433	O95433	AHSA1_HUMAN	Activator of 90 kDa heat shock protein ATPase homolog 1	0.00444035	0.0334954	0.0117144	0.986736
SLC34A2	O95436	O95436	NPT2B_HUMAN	Sodium-dependent phosphate transport protein 2B	0.312087	1.23666	0.655846	0.366707
PARN	O95453	O95453	PARN_HUMAN	Poly(A)-specific ribonuclease PARN	-0.216583	-2.25911	1.56221	0.0703782
PSMG1	O95456	O95456	PSMG1_HUMAN	Proteasome assembly chaperone 1	0.193716	1.5833	0.926496	0.230239
FMNL1	O95466	O95466	FMNL1_HUMAN	Formin-like protein 1	0.379644	1.89845	1.20556	0.138867
SGPL1	O95470	O95470	SGPL1_HUMAN	Sphingosine-1-phosphate lyase 1	0.0401667	0.271599	0.104118	0.870359
CTDNEP1	O95476	O95476	CNEP1_HUMAN	CTD nuclear envelope phosphatase 1	-0.0383468	-0.483915	0.200555	0.761996
NSA2	O95478	O95478	NSA2_HUMAN	Ribosome biogenesis protein NSA2 homolog	-0.0866809	-0.44753	0.183062	0.779458
H6PD	O95479	O95479	G6PE_HUMAN	GDH/6PGL endoplasmic bifunctional protein	0.384719	2.08121	1.38141	0.100006
SEC24A	O95486	O95486	SC24A_HUMAN	Protein transport protein Sec24A	0.349034	4.13849	3.96949	0.000464548
SEC24B	O95487	O95487	SC24B_HUMAN	Protein transport protein Sec24B	-0.0526201	-0.585702	0.251655	0.707338
ADGRL2	O95490	O95490	AGRL2_HUMAN	Adhesion G protein-coupled receptor L2	-0.45879	-2.74994	2.10785	0.023953
TDP2	O95551	O95551	TYDP2_HUMAN	Tyrosyl-DNA phosphodiesterase 2	-0.0638563	-0.449993	0.184233	0.778618
SFT2D2	O95562	O95562	SFT2B_HUMAN	Vesicle transport protein SFT2B	0.352602	1.46015	0.825949	0.274391
MPC2	O95563	O95563	MPC2_HUMAN	Mitochondrial pyruvate carrier 2	0.184719	1.1552	0.597837	0.40632
ETHE1	O95571	O95571	ETHE1_HUMAN	Persulfide dioxygenase ETHE1, mitochondrial	0.44457	3.31462	2.81357	0.0057588
ACSL3	O95573	O95573	ACSL3_HUMAN	Fatty acid CoA ligase Acsl3	0.00875972	0.0942751	0.0337669	0.956672
POLR1A	O95602	O95602	RPA1_HUMAN	DNA-directed RNA polymerase I subunit RPA1	0.0761016	1.02374	0.50873	0.472176
PCNT	O95613	O95613	PCNT_HUMAN	Pericentrin	-0.0975758	-1.34505	0.736342	0.318976
YEATS4	O95619	O95619	YETS4_HUMAN	YEATS domain-containing protein 4	-0.376669	-3.70738	3.34777	0.00172932
CNOT4	O95628	O95628	CNOT4_HUMAN	CCR4-NOT transcription complex subunit 4	-0.0159217	-0.254646	0.0969972	0.876929
STAMBP	O95630	O95630	STABP_HUMAN	STAM-binding protein	-0.0956753	-1.08947	0.552591	0.439344
CPSF4	O95639	O95639	CPSF4_HUMAN	Cleavage and polyadenylation specificity factor subunit 4	-0.305098	-2.22176	1.52348	0.0761713
NFATC1	O95644	O95644	NFAC1_HUMAN	Nuclear factor of activated T-cells, cytoplasmic 1	0.101307	1.08928	0.55246	0.439277
ASMTL	O95671	O95671	ASML_HUMAN	Probable bifunctional dTTP/UTP pyrophosphatase/methyltransferase protein	0.0572357	0.340576	0.133965	0.835267
CDS2	O95674	O95674	CDS2_HUMAN	Phosphatidate cytidylyltransferase 2	-0.021785	-0.237198	0.0897571	0.885192
CEP43	O95684	O95684	CEP43_HUMAN	Centrosomal protein 43	-0.0715448	-0.764284	0.349113	0.607846
PPP1R3D	O95685	O95685	PPR3D_HUMAN	Protein phosphatase 1 regulatory subunit 3D	0.269334	2.00082	1.30282	0.115888
BRD1	O95696	O95696	BRD1_HUMAN	Bromodomain-containing protein 1	-0.125203	-1.20239	0.631181	0.383495
POP4	O95707	O95707	RPP29_HUMAN	Ribonuclease P protein subunit p29	-0.284757	-3.36661	2.88236	0.00501235
HERC2	O95714	O95714	HERC2_HUMAN	E3 ubiquitin-protein ligase HERC2	0.167335	3.61861	3.22418	0.00238779
RAB3D	O95716	P20337;O95716;Q96E17	RAB3D_HUMAN	Ras-related protein Rab-3D	0.197627	1.32832	0.723675	0.325959
SNAP29	O95721	O95721	SNP29_HUMAN	Synaptosomal-associated protein 29	0.317358	2.6695	2.01389	0.028742
OXSR1	O95747	O95747	OXSR1_HUMAN	Serine/threonine-protein kinase OSR1	-0.192604	-1.73055	1.05303	0.183817
GGPS1	O95749	O95749	GGPPS_HUMAN	Geranylgeranyl pyrophosphate synthase	0.227629	1.94144	1.24601	0.128539
HSPA4L	O95757	O95757	HS74L_HUMAN	Heat shock 70 kDa protein 4L	0.159578	0.59605	0.25703	0.702524
PTBP3	O95758	O95758	PTBP3_HUMAN	Polypyrimidine tract-binding protein 3	0.0247947	0.214551	0.0804923	0.89482
STARD3NL	O95772	O95772	STR3N_HUMAN	STARD3 N-terminal-like protein	0.168864	1.17364	0.610787	0.396795
LSM8	O95777	O95777	LSM8_HUMAN	U6 snRNA-associated Sm-like protein LSm8	-0.280933	-2.56954	1.89956	0.0364722
AP2A1	O95782	O95782	AP2A1_HUMAN	AP-2 complex subunit alpha-1	0.0736766	0.885832	0.421211	0.544496
WIZ	O95785	O95785	WIZ_HUMAN	Protein Wiz	-0.614517	-8.35209	11.0126	0
RIGI	O95786	O95786	RIGI_HUMAN	Antiviral innate immune response receptor RIG-I	0.560351	3.52301	3.0929	0.00326164
STAU1	O95793	O95793	STAU1_HUMAN	Double-stranded RNA-binding protein Staufen homolog 1	-0.110973	-0.971022	0.474553	0.498773
TTC4	O95801	O95801	TTC4_HUMAN	Tetratricopeptide repeat protein 4	0.0716711	0.709416	0.318102	0.639316
BAG2	O95816	O95816	BAG2_HUMAN	BAG family molecular chaperone regulator 2	0.096853	0.360597	0.142893	0.826306
BAG3	O95817	O95817	BAG3_HUMAN	BAG family molecular chaperone regulator 3	0.0208564	0.199834	0.0745518	0.903053
MAP4K4	O95819	O95819	M4K4_HUMAN	Mitogen-activated protein kinase kinase kinase kinase 4	-0.192358	-2.26654	1.56996	0.0691977
MLYCD	O95822	O95822	DCMC_HUMAN	Malonyl-CoA decarboxylase, mitochondrial	-0.0295405	-0.236735	0.0895663	0.885423
CRYZL1	O95825	O95825	QORL1_HUMAN	Quinone oxidoreductase-like protein 1	-0.152735	-1.25405	0.668509	0.358342
AIFM1	O95831	O95831	AIFM1_HUMAN	Apoptosis-inducing factor 1, mitochondrial	0.150719	0.707585	0.317084	0.640434
CLDN1	O95832	O95832	CLD1_HUMAN	Claudin-1	0.364204	1.38445	0.766537	0.302721
CLIC3	O95833	O95833	CLIC3_HUMAN	Chloride intracellular channel protein 3	-0.121919	-0.389748	0.156108	0.812196
EML2	O95834	O95834	EMAL2_HUMAN	Echinoderm microtubule-associated protein-like 2	0.773246	4.2188	4.08898	0.000349166
NUDT14	O95848	O95848	NUD14_HUMAN	Uridine diphosphate glucose pyrophosphatase NUDT14	-0.128914	-0.585573	0.251589	0.707307
TSPAN15	O95858	O95858	TSN15_HUMAN	Tetraspanin-15	0.747176	5.98562	6.92911	0
BPNT1	O95861	O95861	BPNT1_HUMAN	3'(2'),5'-bisphosphate nucleotidase 1	0.271335	1.60398	0.943855	0.223366
DDAH2	O95865	O95865	DDAH2_HUMAN	N(G),N(G)-dimethylarginine dimethylaminohydrolase 2	-0.821824	-5.03114	5.35165	1e-05
ABHD16A	O95870	O95870	ABHGA_HUMAN	Phosphatidylserine lipase ABHD16A	0.251358	2.06203	1.36249	0.103549
C6orf47	O95873	O95873	CF047_HUMAN	Uncharacterized protein C6orf47	0.0580851	0.491946	0.204471	0.757907
TXNDC12	O95881	O95881	TXD12_HUMAN	Thioredoxin domain-containing protein 12	0.0844272	0.709233	0.318001	0.639344
TRUB2	O95900	O95900	TRUB2_HUMAN	Pseudouridylate synthase TRUB2, mitochondrial	-0.082254	-0.607226	0.262872	0.695953
SYF2	O95926	O95926	SYF2_HUMAN	Pre-mRNA-splicing factor SYF2	-0.507306	-4.53641	4.57162	0.000142165
EFEMP2	O95967	O95967	FBLN4_HUMAN	EGF-containing fibulin-like extracellular matrix protein 2	-0.947234	-3.49071	3.04899	0.00356703
MBD3	O95983	O95983	MBD3_HUMAN	Methyl-CpG-binding domain protein 3	-0.709055	-5.79618	6.61013	0
TOP3B	O95985	O95985	TOP3B_HUMAN	DNA topoisomerase 3-beta-1	0.0189813	0.151326	0.0554137	0.927579
NUDT3	O95989	O95989	NUDT3_HUMAN	Diphosphoinositol polyphosphate phosphohydrolase 1	-0.191884	-1.33415	0.728076	0.323425
FAM107A	O95990	O95990	F107A_HUMAN	Actin-associated protein FAM107A	-0.488905	-1.81482	1.12849	0.161189
AGR2	O95994	O95994	AGR2_HUMAN	Anterior gradient protein 2 homolog	0.660283	1.1301	0.580397	0.419156
BCL10	O95999	O95999	BCL10_HUMAN	B-cell lymphoma/leukemia 10	-0.0762966	-0.977534	0.478726	0.495584
NDUFB10	O96000	O96000	NDUBA_HUMAN	NADH dehydrogenase [ubiquinone] 1 beta subcomplex subunit 10	0.202267	1.50177	0.859389	0.258945
CLPTM1	O96005	O96005	CLPT1_HUMAN	Putative lipid scramblase CLPTM1	-0.0187173	-0.14671	0.0536278	0.929526
ZBED1	O96006	O96006	ZBED1_HUMAN	E3 SUMO-protein ligase ZBED1	-0.198869	-1.24226	0.659915	0.36399
TOMM40	O96008	O96008	TOM40_HUMAN	Mitochondrial import receptor subunit TOM40 homolog	-0.398037	-3.4459	2.98844	0.00406835
PEX11B	O96011	O96011	PX11B_HUMAN	Peroxisomal membrane protein 11B	0.144582	1.48596	0.846617	0.264685
PAK4	O96013	O96013	PAK4_HUMAN	Serine/threonine-protein kinase PAK 4	-0.397892	-2.65296	1.99479	0.0299647
CHEK2	O96017	O96017	CHK2_HUMAN	Serine/threonine-protein kinase Chk2	-0.391887	-2.57368	1.90424	0.0361455
ACTL6A	O96019	O96019	ACL6A_HUMAN	Actin-like protein 6A	-0.44912	-4.20984	4.07559	0.000351145
MT-CYB	P00156	P00156	CYB_HUMAN	Cytochrome b	0.560539	2.61608	1.95246	0.0328752
CYB5A	P00167	P00167	CYB5_HUMAN	Cytochrome b5	0.347298	1.91424	1.22035	0.134759
ADH1B	P00325	P00325;P08319	ADH1B_HUMAN	All-trans-retinol dehydrogenase [NAD(+)] ADH1B	-0.555675	-1.70556	1.03107	0.191592
LDHA	P00338	P00338	LDHA_HUMAN	L-lactate dehydrogenase A chain	0.462108	2.52084	1.84484	0.0405432
ALDH1A1	P00352	P00352	AL1A1_HUMAN	Aldehyde dehydrogenase 1A1	-0.14262	-0.543504	0.230082	0.728057
GLUD1	P00367	Cont_P00366;P00367;P49448	DHE3_HUMAN	Glutamate dehydrogenase 1, mitochondrial	0.0547523	0.347163	0.136889	0.832749
DHFR	P00374	P00374	DYR_HUMAN	Dihydrofolate reductase	-0.0340242	-0.147063	0.0537641	0.929679
CYB5R3	P00387	P00387	NB5R3_HUMAN	NADH-cytochrome b5 reductase 3	-0.226522	-1.64926	0.982333	0.209359
GSR	P00390	P00390	GSHR_HUMAN	Glutathione reductase, mitochondrial	0.26565	1.64097	0.975239	0.211992
MT-CO1	P00395	P00395	COX1_HUMAN	Cytochrome c oxidase subunit 1	0.61528	4.20514	4.06857	0.000365947
MT-CO2	P00403	P00403	COX2_HUMAN	Cytochrome c oxidase subunit 2	0.551984	2.78982	2.15506	0.0216453
MT-CO3	P00414	P00414	COX3_HUMAN	Cytochrome c oxidase subunit 3	0.263038	1.94922	1.2534	0.127018
SOD1	P00441	P00441	SODC_HUMAN	Superoxide dismutase [Cu-Zn]	0.0540953	0.357367	0.141445	0.8275
CP	P00450	P00450	CERU_HUMAN	Ceruloplasmin	-0.0169709	-0.0846738	0.0302145	0.960635
F13A1	P00488	P00488	F13A_HUMAN	Coagulation factor XIII A chain	-0.183697	-0.701801	0.313874	0.642821
PNP	P00491	P00491	PNPH_HUMAN	Purine nucleoside phosphorylase	-0.4379	-1.49709	0.855603	0.260588
HPRT1	P00492	P00492	HPRT_HUMAN	Hypoxanthine-guanine phosphoribosyltransferase	0.273395	1.40735	0.784319	0.293867
GOT2	P00505	P00505	AATM_HUMAN	Aspartate aminotransferase, mitochondrial	-0.222755	-1.31944	0.716987	0.329431
ABL1	P00519	P00519	ABL1_HUMAN	Tyrosine-protein kinase ABL1	-0.114042	-1.13549	0.584122	0.416074
EGFR	P00533	P00533	EGFR_HUMAN	Epidermal growth factor receptor	0.277698	1.70219	1.02812	0.192699
PGK1	P00558	P00558	PGK1_HUMAN	Phosphoglycerate kinase 1	0.279614	2.14023	1.44035	0.0895497
AK1	P00568	P00568	KAD1_HUMAN	Adenylate kinase isoenzyme 1	0.159369	0.745604	0.338448	0.618991
F2	P00734	P00734	THRB_HUMAN	Prothrombin	-0.415292	-2.25621	1.55919	0.0708532
C1R	P00736	P00736	C1R_HUMAN	Complement C1r subcomponent	-0.198066	-1.19897	0.628743	0.385353
HP	P00738	P00738	HPT_HUMAN	Haptoglobin	-0.269672	-0.858489	0.404582	0.55668
F9	P00740	P00740	FA9_HUMAN	Coagulation factor IX	0.124648	0.498884	0.20787	0.753555
CFD	P00746	P00746	CFAD_HUMAN	Complement factor D	-0.623428	-3.33671	2.84273	0.00545703
PLG	P00747	Cont_P06868;P00747	PLMN_HUMAN	Plasminogen	-0.497768	-2.3449	1.65269	0.0589707
F12	P00748	P00748	FA12_HUMAN	Coagulation factor XII	-0.38088	-1.64629	0.979786	0.210292
CFB	P00751	P00751	CFAB_HUMAN	Complement factor B	0.222826	1.22573	0.647939	0.371886
ADA	P00813	P00813	ADA_HUMAN	Adenosine deaminase	0.0808046	0.54446	0.230565	0.727796
MT-ATP6	P00846	P00846	ATP6_HUMAN	ATP synthase subunit a	0.252356	1.29963	0.702154	0.338818
CA1	P00915	P00915	CAH1_HUMAN	Carbonic anhydrase 1	0.217194	0.500944	0.208882	0.752527
CA2	P00918	P00918	CAH2_HUMAN	Carbonic anhydrase 2	-0.0866066	-0.343535	0.135276	0.833868
ASS1	P00966	P00966	ASSY_HUMAN	Argininosuccinate synthase	-0.105154	-0.418659	0.169468	0.795999
OAS1	P00973	P00973	OAS1_HUMAN	2'-5'-oligoadenylate synthase 1	0.278739	1.22082	0.644404	0.374036
SERPINC1	P01008	P01008	ANT3_HUMAN	Antithrombin-III	-0.250832	-1.79137	1.10727	0.167101
SERPINA1	P01009	P01009	A1AT_HUMAN	Alpha-1-antitrypsin	-0.492215	-2.27873	1.58271	0.067564
SERPINA3	P01011	P01011	AACT_HUMAN	Alpha-1-antichymotrypsin	-0.716724	-2.71025	2.06128	0.026157
AGT	P01019	P01019	ANGT_HUMAN	Angiotensinogen	-0.273386	-1.49059	0.850348	0.263239
A2M	P01023	P20742;P01023	A2MG_HUMAN	Alpha-2-macroglobulin	-0.211589	-0.856982	0.403672	0.557511
C3	P01024	P01024	CO3_HUMAN	Complement C3	0.111552	0.524937	0.220765	0.739558
C5	P01031	P01031	CO5_HUMAN	Complement C5	-0.315708	-1.76639	1.08485	0.174079
TIMP1	P01033	P01033	TIMP1_HUMAN	Metalloproteinase inhibitor 1	-0.0274545	-0.122661	0.0444216	0.940996
CST3	P01034	P01034	CYTC_HUMAN	Cystatin-C	0.0278915	0.188194	0.0698973	0.909287
CSTA	P01040	P01040	CYTA_HUMAN	Cystatin-A	-0.0736182	-0.302135	0.117157	0.854831
KNG1	P01042	P01042	KNG1_HUMAN	Kininogen-1	-0.265077	-1.43097	0.80283	0.285616
NRAS	P01111	P01111;P01112	RASN_HUMAN	GTPase NRas	-0.125756	-1.47876	0.840829	0.267063
KRAS	P01116	P01116	RASK_HUMAN	GTPase KRas	-0.246295	-1.5024	0.859898	0.258749
TGFB1	P01137	P01137	TGFB1_HUMAN	Transforming growth factor beta-1 proprotein	0.0654113	0.335519	0.131728	0.838188
JCHAIN	P01591	P01591	IGJ_HUMAN	Immunoglobulin J chain	0.455665	1.50024	0.858147	0.259456
IGKV1-39;IGKV1D-39	P01597;P04432	P04432;P01597;A0A0C4DH73;A0A0C4DH72;P01611	KV139_HUMAN;KVD39_HUMAN	Immunoglobulin kappa variable 1-39	0.318843	1.41122	0.787338	0.292769
IGKV3-20	P01619	P01619	KV320_HUMAN	Immunoglobulin kappa variable 3-20	-0.0993824	-0.307847	0.119626	0.852393
IGLV1-47	P01700	P01700	LV147_HUMAN	Immunoglobulin lambda variable 1-47	0.0605001	0.263064	0.100522	0.872787
IGLV3-25	P01717	P01717	LV325_HUMAN	Immunoglobulin lambda variable 3-25	-0.20766	-0.741272	0.335991	0.620819
IGHV3-30;IGHV3-30-5	P01768;P0DP03	P01768;A0A0J9YY99;P01772;P0DP03	HV330_HUMAN;HVC05_HUMAN	Immunoglobulin heavy variable 3-30	-0.103087	-0.436702	0.177934	0.785683
IGHV3-7	P01780	P01780	HV307_HUMAN	Immunoglobulin heavy variable 3-7	-0.186911	-0.804348	0.372358	0.585928
PIGR	P01833	P01833	PIGR_HUMAN	Polymeric immunoglobulin receptor	1.09901	2.51914	1.84294	0.0407324
IGKC	P01834	P01834	IGKC_HUMAN	Immunoglobulin kappa constant	-0.23576	-0.828525	0.386632	0.573136
IGHG1	P01857	P01859;P01857	IGHG1_HUMAN	Immunoglobulin heavy constant gamma 1	-0.0107301	-0.0380343	0.0133256	0.984161
IGHG2	P01859	P01859	IGHG2_HUMAN	Immunoglobulin heavy constant gamma 2	-0.205021	-0.773162	0.35422	0.602792
IGHG3	P01860	P01860	IGHG3_HUMAN	Immunoglobulin heavy constant gamma 3	0.0615191	0.26633	0.101896	0.872106
IGHG4	P01861	P01861	IGHG4_HUMAN	Immunoglobulin heavy constant gamma 4	-0.0845014	-0.287669	0.110945	0.861257
IGHM	P01871	P01871	IGHM_HUMAN	Immunoglobulin heavy constant mu	0.0522485	0.165485	0.0609299	0.921039
IGHA1	P01876	P01877;P01876	IGHA1_HUMAN	Immunoglobulin heavy constant alpha 1	-0.111351	-0.289448	0.111706	0.860345
IGHA2	P01877	P01877	IGHA2_HUMAN	Immunoglobulin heavy constant alpha 2	0.20665	0.644711	0.282752	0.676222
HLA-B	P01889	P01889;P04439	HLAB_HUMAN	HLA class I histocompatibility antigen, B alpha chain	2.03556	7.76977	10.003	0
HLA-DRA	P01903	P01903;P01906	DRA_HUMAN	HLA class II histocompatibility antigen, DR alpha chain	2.02812	4.85812	5.07532	2.53165e-05
HLA-DRB1	P01911	P01911	DRB1_HUMAN	HLA class II histocompatibility antigen, DRB1 beta chain	1.91537	5.4924	6.1041	0
HBD	P02042	P02042	HBD_HUMAN	Hemoglobin subunit delta	0.101399	0.183541	0.0680478	0.912221
COL1A1	P02452	P02452	CO1A1_HUMAN	Collagen alpha-1(I) chain	-0.829118	-1.72551	1.04858	0.185211
COL3A1	P02461	P02461	CO3A1_HUMAN	Collagen alpha-1(III) chain	-1.05495	-2.32364	1.63008	0.0616215
COL4A1	P02462	P02462;P29400	CO4A1_HUMAN	Collagen alpha-1(IV) chain	-0.282135	-1.47228	0.835635	0.269548
CRYAB	P02511	P02511	CRYAB_HUMAN	Alpha-crystallin B chain	0.928431	2.39185	1.70311	0.0533461
LMNA	P02545	P02545	LMNA_HUMAN	Prelamin-A/C	0.711649	3.88546	3.6004	0.00105994
SPTA1	P02549	P02549	SPTA1_HUMAN	Spectrin alpha chain, erythrocytic 1	-0.270263	-0.804211	0.372278	0.585917
APOA1	P02647	P02647	APOA1_HUMAN	Apolipoprotein A-I	-0.219895	-1.01505	0.503035	0.477111
APOE	P02649	P02649	APOE_HUMAN	Apolipoprotein E	-0.232034	-1.10237	0.561359	0.432605
APOA2	P02652	P02652	APOA2_HUMAN	Apolipoprotein A-II	-0.0856743	-0.454056	0.18617	0.777285
APOC1	P02654	P02654	APOC1_HUMAN	Apolipoprotein C-I	-0.437163	-1.83437	1.14631	0.156263
APOC3	P02656	P02656	APOC3_HUMAN	Apolipoprotein C-III	-0.288133	-1.26889	0.67939	0.352055
FGA	P02671	P02671	FIBA_HUMAN	Fibrinogen alpha chain	-0.712276	-2.19152	1.49241	0.0810055
FGB	P02675	P02675	FIBB_HUMAN	Fibrinogen beta chain	-0.664696	-1.85725	1.16732	0.149613
FGG	P02679	P02679	FIBG_HUMAN	Fibrinogen gamma chain	-0.724982	-1.90391	1.21066	0.137421
MBP	P02686	P02686	MBP_HUMAN	Myelin basic protein	0.0297616	0.146695	0.0536222	0.929395
SLC4A1	P02730	P02730	B3AT_HUMAN	Band 3 anion transport protein	-0.137576	-0.256901	0.0979397	0.875767
APCS	P02743	P02743	SAMP_HUMAN	Serum amyloid P-component	-0.711902	-2.58958	1.92227	0.0347879
C1QA	P02745	P02745	C1QA_HUMAN	Complement C1q subcomponent subunit A	-0.19424	-0.850428	0.399725	0.560929
C1QB	P02746	P02746	C1QB_HUMAN	Complement C1q subcomponent subunit B	-0.219834	-1.09463	0.55609	0.436126
C1QC	P02747	P02747	C1QC_HUMAN	Complement C1q subcomponent subunit C	-0.0533624	-0.1827	0.0677141	0.912625
C9	P02748	Cont_Q3MHN2;P02748	CO9_HUMAN	Complement component C9	-0.229519	-1.29568	0.699211	0.34009
APOH	P02749	P02749	APOH_HUMAN	Beta-2-glycoprotein 1	-0.484243	-2.0798	1.38003	0.10031
LRG1	P02750	P02750	A2GL_HUMAN	Leucine-rich alpha-2-glycoprotein	-0.361134	-1.44004	0.809984	0.281767
FN1	P02751	Cont_P07589;P02751	FINC_HUMAN	Fibronectin	-0.633327	-2.24738	1.55	0.0721652
RBP4	P02753	Cont_P18902;P02753	RET4_HUMAN	Retinol-binding protein 4	-0.399476	-2.38551	1.69628	0.054086
AMBP	P02760	P02760	AMBP_HUMAN	Protein AMBP	-0.460007	-2.49935	1.82091	0.0424333
ORM1	P02763	P02763	A1AG1_HUMAN	Alpha-1-acid glycoprotein 1	-0.462451	-1.68038	1.00915	0.199675
AHSG	P02765	P02765	FETUA_HUMAN	Alpha-2-HS-glycoprotein	-0.303389	-1.58884	0.931136	0.228296
TTR	P02766	P02766	TTHY_HUMAN	Transthyretin	-0.279919	-1.62704	0.963366	0.216346
ALB	P02768	P02768	ALBU_HUMAN	Albumin	-0.286045	-1.53119	0.883365	0.248307
GC	P02774	P02774	VTDB_HUMAN	Vitamin D-binding protein	-0.306738	-1.71075	1.03561	0.190002
TFRC	P02786	P02786	TFR1_HUMAN	Transferrin receptor protein 1	0.606038	2.03293	1.33397	0.109306
TF	P02787	P02787	TRFE_HUMAN	Serotransferrin	-0.140318	-0.698225	0.311894	0.644946
LTF	P02788	Cont_Q29443;P02788	TRFL_HUMAN	Lactotransferrin	0.762942	2.09417	1.39427	0.0976433
HPX	P02790	P02790	HEMO_HUMAN	Hemopexin	-0.328372	-1.62771	0.963939	0.216177
FTL	P02792	P02792	FRIL_HUMAN	Ferritin light chain	-0.138757	-0.44641	0.18253	0.779768
FTH1	P02794	P02794	FRIH_HUMAN	Ferritin heavy chain	-0.206502	-0.81536	0.378837	0.58049
ESR1	P03372	P03372	ESR1_HUMAN	Estrogen receptor	-0.284839	-1.37484	0.759127	0.306477
MT-ND1	P03886	P03886	NU1M_HUMAN	NADH-ubiquinone oxidoreductase chain 1	0.255174	2.25469	1.5576	0.0710654
MT-ND2	P03891	P03891	NU2M_HUMAN	NADH-ubiquinone oxidoreductase chain 2	0.28158	1.65787	0.989716	0.20677
MT-ND3	P03897	P03897	NU3M_HUMAN	NADH-ubiquinone oxidoreductase chain 3	0.174123	0.779535	0.357902	0.598431
MT-ND4	P03905	P03905	NU4M_HUMAN	NADH-ubiquinone oxidoreductase chain 4	0.214327	1.61001	0.948937	0.221385
MT-ND5	P03915	P03915	NU5M_HUMAN	NADH-ubiquinone oxidoreductase chain 5	0.0163201	0.102563	0.0368543	0.952335
MT-ND6	P03923	P03923	NU6M_HUMAN	NADH-ubiquinone oxidoreductase chain 6	0.194232	1.6095	0.948512	0.221474
KLKB1	P03952	P03952	KLKB1_HUMAN	Plasma kallikrein	-0.299431	-1.67429	1.00388	0.201442
C4BPA	P04003	P04003	C4BPA_HUMAN	C4b-binding protein alpha chain	-0.260986	-0.760845	0.347141	0.609384
VTN	P04004	P04004	VTNC_HUMAN	Vitronectin	-0.590827	-2.59756	1.93133	0.0341631
CAT	P04040	P04040	CATA_HUMAN	Catalase	0.260803	1.56985	0.915284	0.234545
GBA1	P04062	P04062	GBA1_HUMAN	Lysosomal acid glucosylceramidase	0.022208	0.179546	0.066465	0.913955
FUCA1	P04066	P04066	FUCO_HUMAN	Tissue alpha-L-fucosidase	0.131547	0.773768	0.354569	0.602429
ALDOA	P04075	P04075	ALDOA_HUMAN	Fructose-bisphosphate aldolase A	0.0764377	0.499519	0.208182	0.753302
CSTB	P04080	P04080	CYTB_HUMAN	Cystatin-B	0.175733	0.870953	0.412132	0.550125
ANXA1	P04083	P04083	ANXA1_HUMAN	Annexin A1	-0.0155389	-0.0712455	0.0252895	0.967379
APOB	P04114	P04114	APOB_HUMAN	Apolipoprotein B-100	0.0174829	0.0669438	0.0237226	0.969327
NR3C1	P04150	P04150	GCR_HUMAN	Glucocorticoid receptor	0.645942	3.75695	3.41746	0.00147716
PRNP	P04156	P04156	PRIO_HUMAN	Major prion protein	0.135064	1.02054	0.506627	0.473982
SOD2	P04179	P04179	SODM_HUMAN	Superoxide dismutase [Mn], mitochondrial	0.661894	2.87164	2.25323	0.0178651
OAT	P04181	P04181	OAT_HUMAN	Ornithine aminotransferase, mitochondrial	0.609967	2.04258	1.34341	0.107366
HRG	P04196	P04196	HRG_HUMAN	Histidine-rich glycoprotein	-0.400351	-2.40297	1.71515	0.0521493
THY1	P04216	P04216	THY1_HUMAN	Thy-1 membrane glycoprotein	-1.20154	-3.02289	2.43919	0.0121446
A1BG	P04217	P04217	A1BG_HUMAN	Alpha-1B-glycoprotein	-0.477077	-2.27241	1.57609	0.06827
CD74	P04233	P04233	HG2A_HUMAN	HLA class II histocompatibility antigen gamma chain	2.02524	5.93907	6.85051	0
VWF	P04275	P04275	VWF_HUMAN	von Willebrand factor	0.237387	0.68578	0.305037	0.651844
TUBB4A	P04350	P04350	TBB4A_HUMAN	Tubulin beta-4A chain	-0.967524	-3.0994	2.53541	0.00999738
GAPDH	P04406	P04406	G3P_HUMAN	Glyceraldehyde-3-phosphate dehydrogenase	-0.230992	-1.41904	0.793456	0.289786
ASL	P04424	P04424	ARLY_HUMAN	Argininosuccinate lyase	0.787662	4.0878	3.89463	0.000554502
HLA-A	P04439	P04439	HLAA_HUMAN	HLA class I histocompatibility antigen, A alpha chain	1.92347	6.92118	8.53119	0
ERBB2	P04626	P04626	ERBB2_HUMAN	Receptor tyrosine-protein kinase erbB-2	0.192165	1.55905	0.906319	0.23793
CAPNS1	P04632	Q96L46;P04632	CPNS1_HUMAN	Calpain small subunit 1	0.41226	3.26488	2.74832	0.00651304
HSPB1	P04792	P04792	HSPB1_HUMAN	Heat shock protein beta-1	0.686609	3.47697	3.03038	0.00370297
RPN1	P04843	P04843	RPN1_HUMAN	Dolichyl-diphosphooligosaccharide--protein glycosyltransferase subunit 1	0.131162	1.57695	0.921193	0.232651
RPN2	P04844	P04844	RPN2_HUMAN	Dolichyl-diphosphooligosaccharide--protein glycosyltransferase subunit 2	0.114739	1.58091	0.924502	0.231068
GNAI2	P04899	P04899	GNAI2_HUMAN	Guanine nucleotide-binding protein G(i) subunit alpha-2	0.0294164	0.318635	0.124317	0.84686
SLC4A2	P04920	P04920;P48751	B3A2_HUMAN	Anion exchange protein 2	0.166883	0.694367	0.309763	0.647289
ATP1A1	P05023	P05023	AT1A1_HUMAN	Sodium/potassium-transporting ATPase subunit alpha-1	0.352146	2.80905	2.17798	0.020645
ATP1B1	P05026	P05026	AT1B1_HUMAN	Sodium/potassium-transporting ATPase subunit beta-1	0.115488	0.553198	0.234989	0.724495
APP	P05067	P05067	A4_HUMAN	Amyloid-beta precursor protein	-0.310723	-2.60032	1.93447	0.0339843
ARG1	P05089	P05089	ARGI1_HUMAN	Arginase-1	-0.300301	-1.11331	0.568839	0.428023
APOD	P05090	P05090	APOD_HUMAN	Apolipoprotein D	-0.240753	-0.901914	0.431103	0.535419
ALDH2	P05091	P05091;O94788	ALDH2_HUMAN	Aldehyde dehydrogenase, mitochondrial	0.0936294	0.344673	0.135782	0.833588
ITGB2	P05107	P05107	ITB2_HUMAN	Integrin beta-2	0.944484	3.27553	2.76224	0.0063655
S100A8	P05109	P05109	S10A8_HUMAN	Protein S100-A8	0.310692	0.967054	0.472017	0.500565
HMGN1	P05114	P05114	HMGN1_HUMAN	Non-histone chromosomal protein HMG-14	0.0647759	0.515677	0.216158	0.744884
SLC25A5	P05141	P05141;P12236;P12235;Q9H0C2	ADT2_HUMAN	ADP/ATP translocase 2	0.253394	1.45139	0.818981	0.277452
SERPINA5	P05154	P05154	IPSP_HUMAN	Plasma serine protease inhibitor	-0.261662	-1.24444	0.661503	0.362913
SERPING1	P05155	P05155	IC1_HUMAN	Plasma protease C1 inhibitor	-0.376418	-1.84276	1.15399	0.153656
CFI	P05156	P05156	CFAI_HUMAN	Complement factor I	-0.177071	-1.01023	0.499884	0.479729
ISG15	P05161	P05161	ISG15_HUMAN	Ubiquitin-like protein ISG15	1.03395	3.05239	2.47611	0.0112964
MPO	P05164	P05164	PERM_HUMAN	Myeloperoxidase	0.0901057	0.27027	0.103556	0.870747
PCCA	P05165	P05165	PCCA_HUMAN	Propionyl-CoA carboxylase alpha chain, mitochondrial	-0.178324	-1.23274	0.653005	0.368588
PCCB	P05166	P05166	PCCB_HUMAN	Propionyl-CoA carboxylase beta chain, mitochondrial	-0.184386	-1.21798	0.642355	0.375605
ALPL	P05186	P05186	PPBT_HUMAN	Alkaline phosphatase, tissue-nonspecific isozyme	-2.1548	-6.48142	7.77368	0
EIF2S1	P05198	P05198	IF2A_HUMAN	Eukaryotic translation initiation factor 2 subunit 1	0.13352	1.41781	0.792492	0.290315
ICAM1	P05362	P05362	ICAM1_HUMAN	Intercellular adhesion molecule 1	0.778848	2.80144	2.1689	0.0209962
RPLP1	P05386	P05386	RLA1_HUMAN	Large ribosomal subunit protein P1	0.0626771	0.785841	0.361557	0.595247
RPLP2	P05387	P05387	RLA2_HUMAN	Large ribosomal subunit protein P2	0.0953647	1.24124	0.659174	0.36445
RPLP0	P05388	P05388	RLA0_HUMAN	Large ribosomal subunit protein uL10	-0.0851114	-0.908198	0.43499	0.532011
FABP3	P05413	P05413	FABPH_HUMAN	Fatty acid-binding protein, heart	0.0140568	0.0440979	0.0154871	0.981177
POLR3D	P05423	P05423	RPC4_HUMAN	DNA-directed RNA polymerase III subunit RPC4	-0.139133	-1.23158	0.652165	0.369092
CLEC3B	P05452	Cont_Q2KIS7;P05452	TETN_HUMAN	Tetranectin	-0.257412	-1.6129	0.951379	0.220393
SSB	P05455	P05455	LA_HUMAN	Lupus La protein	-0.644582	-5.81944	6.64916	0
SERPINA7	P05543	P05543	THBG_HUMAN	Thyroxine-binding globulin	-0.371102	-1.83442	1.14636	0.156295
SERPIND1	P05546	P05546	HEP2_HUMAN	Heparin cofactor 2	-0.386903	-1.92988	1.23508	0.131087
ITGB1	P05556	P05556	ITB1_HUMAN	Integrin beta-1	-0.119014	-1.02059	0.506662	0.47405
UROD	P06132	P06132	DCUP_HUMAN	Uroporphyrinogen decarboxylase	0.0192716	0.130815	0.0475248	0.93677
INSR	P06213	P06213	INSR_HUMAN	Insulin receptor	-0.128983	-1.17486	0.611642	0.396182
GLA	P06280	P06280	AGAL_HUMAN	Alpha-galactosidase A	0.0440758	0.277839	0.10676	0.867126
IGKV4-1	P06312	P06312	KV401_HUMAN	Immunoglobulin kappa variable 4-1	-0.049841	-0.182866	0.0677799	0.912633
GSN	P06396	Cont_Q3SX14;P06396	GELS_HUMAN	Gelsolin	-0.0673216	-0.358433	0.141922	0.827039
RB1	P06400	P06400	RB_HUMAN	Retinoblastoma-associated protein	-0.144809	-0.994659	0.489766	0.487065
PGR	P06401	P06401	PRGR_HUMAN	Progesterone receptor	-0.879501	-3.62957	3.23935	0.00231769
PTMA	P06454	P06454	PTMA_HUMAN	Prothymosin alpha	-0.398867	-2.34247	1.65011	0.0592251
CDK1	P06493	P06493	CDK1_HUMAN	Cyclin-dependent kinase 1	-0.514406	-2.5119	1.83487	0.0413757
ATP5F1B	P06576	P06576	ATPB_HUMAN	ATP synthase subunit beta, mitochondrial	-0.0673724	-0.472254	0.194905	0.767272
C2	P06681	P06681	CO2_HUMAN	Complement C2	0.348793	2.12364	1.42369	0.0922004
S100A9	P06702	P06702	S10A9_HUMAN	Protein S100-A9	0.287691	0.906479	0.433926	0.532359
S100A6	P06703	P06703	S10A6_HUMAN	Protein S100-A6	1.08951	3.97746	3.73326	0.000794702
APOA4	P06727	P06727	APOA4_HUMAN	Apolipoprotein A-IV	-0.210838	-1.2154	0.640506	0.376753
EIF4E	P06730	P06730	IF4E_HUMAN	Eukaryotic translation initiation factor 4E	-0.181704	-1.59523	0.936495	0.226216
ENO1	P06733	P06733	ENOA_HUMAN	Alpha-enolase	0.188648	1.1615	0.602247	0.403468
PYGL	P06737	P06737	PYGL_HUMAN	Glycogen phosphorylase, liver form	-0.0385806	-0.217832	0.0818252	0.894449
GPI	P06744	P06744	G6PI_HUMAN	Glucose-6-phosphate isomerase	0.341487	1.79232	1.10813	0.166868
POLB	P06746	P06746	DPOLB_HUMAN	DNA polymerase beta	-0.518759	-4.81375	5.00504	2.43902e-05
NPM1	P06748	P06748	NPM_HUMAN	Nucleophosmin	0.130848	0.923457	0.444483	0.523638
TPM3	P06753	P06753	TPM3_HUMAN	Tropomyosin alpha-3 chain	0.0258501	0.221628	0.0833716	0.892452
ITGAV	P06756	P06756	ITAV_HUMAN	Integrin alpha-V	0.656607	5.10368	5.46853	1.05541e-05
HEXA	P06865	P06865	HEXA_HUMAN	Beta-hexosaminidase subunit alpha	0.391356	2.38877	1.69979	0.0537148
EPHX1	P07099	P07099	HYEP_HUMAN	Epoxide hydrolase 1	0.66717	2.84537	2.22153	0.0190818
DBI	P07108	P07108	ACBP_HUMAN	Acyl-CoA-binding protein	0.579955	3.18373	2.6431	0.0080522
LDHB	P07195	Cont_Q5E9B1;P07195;P07864;Q6ZMR3;P00338	LDHB_HUMAN	L-lactate dehydrogenase B chain	-0.490635	-3.06741	2.495	0.0109138
CENPB	P07199	P07199	CENPB_HUMAN	Major centromere autoantigen B	-0.470931	-5.12027	5.49534	1.06952e-05
GPX1	P07203	P07203	GPX1_HUMAN	Glutathione peroxidase 1	-0.123691	-0.774217	0.354829	0.602206
PGK2	P07205	P07205	PGK2_HUMAN	Phosphoglycerate kinase 2	0.536722	3.98894	3.74996	0.000773333
PROS1	P07225	P07225	PROS_HUMAN	Vitamin K-dependent protein S	-0.360283	-1.77577	1.09324	0.171716
P4HB	P07237	P07237	PDIA1_HUMAN	Protein disulfide-isomerase	0.677815	3.42764	2.96389	0.00424437
H1-0	P07305	P07305	H10_HUMAN	Histone H1.0	-0.363593	-1.54858	0.897664	0.241849
ACYP1	P07311	P07311	ACYP1_HUMAN	Acylphosphatase-1	-0.357011	-2.59819	1.93205	0.0341386
CRYGC	P07315	P07315	CRGC_HUMAN	Gamma-crystallin C	-0.0355982	-0.151501	0.0554817	0.927714
FES	P07332	P16591;P07332	FES_HUMAN	Tyrosine-protein kinase Fes/Fps	0.325496	3.03871	2.45896	0.011682
CTSD	P07339	P07339	CATD_HUMAN	Cathepsin D	0.3121	1.81571	1.1293	0.161187
ANXA2	P07355	P07355;A6NMY6	ANXA2_HUMAN	Annexin A2	0.382595	2.30585	1.61124	0.0640618
C8A	P07357	P07357	CO8A_HUMAN	Complement component C8 alpha chain	-0.154436	-0.687471	0.305965	0.651107
C8B	P07358	P07358	CO8B_HUMAN	Complement component C8 beta chain	-0.412847	-2.1376	1.43771	0.0898439
C8G	P07360	P07360	CO8G_HUMAN	Complement component C8 gamma chain	-0.225185	-0.982064	0.481637	0.493151
CAPN1	P07384	P07384	CAN1_HUMAN	Calpain-1 catalytic subunit	0.42548	3.52545	3.09623	0.00323664
CA3	P07451	P07451	CAH3_HUMAN	Carbonic anhydrase 3	-0.231622	-0.861298	0.406279	0.555134
PSAP	P07602	P07602	SAP_HUMAN	Prosaposin	0.222892	1.86744	1.17673	0.147056
HEXB	P07686	P07686	HEXB_HUMAN	Beta-hexosaminidase subunit beta	0.319326	1.84735	1.15821	0.152329
CTSL	P07711	P07711	CATL1_HUMAN	Procathepsin L	0.0853751	0.498792	0.207825	0.753495
PFN1	P07737	Cont_P02584;P07737	PROF1_HUMAN	Profilin-1	0.141994	1.25358	0.668166	0.358568
BPGM	P07738	P07738	PMGE_HUMAN	Bisphosphoglycerate mutase	0.143923	0.798889	0.369161	0.588256
APRT	P07741	P07741	APT_HUMAN	Adenine phosphoribosyltransferase	0.173446	1.03896	0.518759	0.464844
EPRS1	P07814	P07814	SYEP_HUMAN	Bifunctional glutamate/proline--tRNA ligase	0.142459	1.34493	0.736249	0.318891
CTSB	P07858	P07858	CATB_HUMAN	Cathepsin B	-0.268221	-1.19311	0.624567	0.387895
HSP90AA1	P07900	P07900	HS90A_HUMAN	Heat shock protein HSP 90-alpha	0.00412022	0.0399607	0.0140112	0.983521
GALT	P07902	P07902	GALT_HUMAN	Galactose-1-phosphate uridylyltransferase	0.348521	2.62011	1.95706	0.0325179
HNRNPC	P07910	P07910	HNRPC_HUMAN	Heterogeneous nuclear ribonucleoproteins C1/C2	-0.608831	-5.77486	6.57439	0
UQCRH	P07919	P07919	QCR6_HUMAN	Cytochrome b-c1 complex subunit 6, mitochondrial	0.49514	1.49764	0.856046	0.260379
LAMB1	P07942	P07942	LAMB1_HUMAN	Laminin subunit beta-1	0.0349786	0.122157	0.0442304	0.941235
YES1	P07947	P07947	YES_HUMAN	Tyrosine-protein kinase Yes	0.171804	1.79404	1.10968	0.166411
LYN	P07948	P07948	LYN_HUMAN	Tyrosine-protein kinase Lyn	0.727987	5.19158	5.61093	1.13314e-05
FH	P07954	P07954	FUMH_HUMAN	Fumarate hydratase, mitochondrial	0.16057	0.907557	0.434593	0.531898
ERCC1	P07992	P07992	ERCC1_HUMAN	DNA excision repair protein ERCC-1	-0.167455	-1.2967	0.699968	0.339842
THBS1	P07996	Cont_Q28178;P07996	TSP1_HUMAN	Thrombospondin-1	-0.320335	-1.76965	1.08777	0.173246
ZFX;ZFY	P08048;P17010	P08048;P17010	ZFX_HUMAN;ZFY_HUMAN	Zinc finger Y-chromosomal protein	-0.228311	-1.84548	1.15649	0.152864
IGF1R	P08069	P08069	IGF1R_HUMAN	Insulin-like growth factor 1 receptor	-0.656643	-2.89354	2.2798	0.0168601
COL1A2	P08123	Cont_P02465;P08123	CO1A2_HUMAN	Collagen alpha-2(I) chain	-0.520959	-1.23035	0.65128	0.369526
ANXA6	P08133	P08133	ANXA6_HUMAN	Annexin A6	0.0797176	0.404777	0.163021	0.803969
RHOC	P08134	P08134	RHOC_HUMAN	Rho-related GTP-binding protein RhoC	0.063758	0.390777	0.156579	0.811585
CD55	P08174	P08174	DAF_HUMAN	Complement decay-accelerating factor	0.177255	0.811506	0.376565	0.582
SLC3A2	P08195	P08195	4F2_HUMAN	4F2 cell-surface antigen heavy chain	0.5647	3.40906	2.93897	0.00441139
GUSB	P08236	P08236	BGLR_HUMAN	Beta-glucuronidase	0.385137	1.79915	1.11429	0.165138
PFKM	P08237	P08237	PFKAM_HUMAN	ATP-dependent 6-phosphofructokinase, muscle type	-0.684624	-3.87904	3.59118	0.00109738
HSP90AB1	P08238	P08238	HS90B_HUMAN	Heat shock protein HSP 90-beta	-0.209146	-1.41969	0.793964	0.289528
SRPRA	P08240	P08240	SRPRA_HUMAN	Signal recognition particle receptor subunit alpha	0.325509	3.15442	2.60548	0.00872011
ASNS	P08243	P08243	ASNS_HUMAN	Asparagine synthetase [glutamine-hydrolyzing]	-0.0125584	-0.0580645	0.0205044	0.974455
SOD3	P08294	P08294	SODE_HUMAN	Extracellular superoxide dismutase [Cu-Zn]	-0.765945	-2.17447	1.47502	0.0837097
CTSG	P08311	P08311	CATG_HUMAN	Cathepsin G	-0.156081	-0.400298	0.160954	0.806507
HMBS	P08397	P08397	HEM3_HUMAN	Porphobilinogen deaminase	0.0409831	0.44769	0.183138	0.779464
MME	P08473	P08473	NEP_HUMAN	Neprilysin	0.0473954	0.339516	0.133495	0.835906
PDHA1	P08559	P08559;P29803	ODPA_HUMAN	Pyruvate dehydrogenase E1 component subunit alpha, somatic form, mitochondrial	0.00315299	0.0221409	0.0077087	0.990635
CD14	P08571	P08571	CD14_HUMAN	Monocyte differentiation antigen CD14	0.644567	2.69322	2.04142	0.0273076
COL4A2	P08572	P08572	CO4A2_HUMAN	Collagen alpha-2(IV) chain	-0.23822	-0.96814	0.472711	0.500111
CYC1	P08574	P08574	CY1_HUMAN	Cytochrome c1, heme protein, mitochondrial	0.568244	2.69753	2.04644	0.0270455
PTPRC	P08575	P08575	PTPRC_HUMAN	Receptor-type tyrosine-protein phosphatase C	0.951166	3.53887	3.11455	0.00310693
SNRPB2	P08579	P08579	RU2B_HUMAN	U2 small nuclear ribonucleoprotein B''	-0.391061	-4.22967	4.10523	0.000341969
MYL3	P08590	P08590	MYL3_HUMAN	Myosin light chain 3	0.134268	0.528234	0.222412	0.737707
CFH	P08603	P08603	CFAH_HUMAN	Complement factor H	-0.178987	-0.969346	0.473481	0.499563
SNRNP70	P08621	P08621	RU17_HUMAN	U1 small nuclear ribonucleoprotein 70 kDa	-0.398536	-5.1884	5.60576	1.12676e-05
ITGA5	P08648	P08648	ITA5_HUMAN	Integrin alpha-5	0.740573	2.83878	2.2136	0.0193666
NFIC	P08651	Q14938;Q12857;O00712;P08651	NFIC_HUMAN	Nuclear factor 1 C-type	-0.2566	-2.12575	1.4258	0.091848
VIM	P08670	Cont_O43790;Cont_O95678;Cont_P02538;Cont_P04259;Cont_P05787;Cont_P08729;Cont_P12035;Cont_P13647;Cont_P48668;Cont_P78385;Cont_P78386;Cont_Q01546;Cont_Q14533;Cont_Q5XKE5;Cont_Q8N1N4;Cont_Q9NSB2;Cont_P07744;Cont_Q922U2;Cont_P50446;Cont_Q9DCV7;Cont_Q8BGZ7;Cont_Q8VED5;Cont_P15241;Cont_P25691;Q5XKE5;P04259;P12035;P78386;P05787;P08729;P13647;O43790;P14136;P02538;Q14533;O95678;P78385;P08670;P48668;Q01546…	VIME_HUMAN	Vimentin	-0.46618	-1.66471	0.995607	0.204845
SERPINF2	P08697	P08697	A2AP_HUMAN	Alpha-2-antiplasmin	-0.307568	-1.89729	1.20447	0.139134
RPS17	P08708	P08708	RS17_HUMAN	Small ribosomal subunit protein eS17	-0.157283	-1.82132	1.1344	0.15988
GNAI3	P08754	P08754	GNAI3_HUMAN	Guanine nucleotide-binding protein G(i) subunit alpha-3	0.122884	1.23807	0.656872	0.366184
ANXA5	P08758	P08758	ANXA5_HUMAN	Annexin A5	-0.145745	-1.15332	0.596527	0.407287
STS	P08842	P08842	STS_HUMAN	Steryl-sulfatase	0.532836	2.55561	1.88384	0.0376161
RPSA	P08865	A0A8I5KQE6;P08865	RSSA_HUMAN	Small ribosomal subunit protein uS2	-0.0669342	-0.881057	0.418289	0.546219
CD63	P08962	P08962	CD63_HUMAN	CD63 antigen	0.25111	1.11556	0.570386	0.426988
MRPL3	P09001	P09001	RM03_HUMAN	Large ribosomal subunit protein uL3m	-0.0280118	-0.21506	0.0806989	0.894946
SNRPA	P09012	P09012	SNRPA_HUMAN	U1 small nuclear ribonucleoprotein A	-0.341349	-4.64037	4.73285	8.55615e-05
ENO2	P09104	P09104	ENOG_HUMAN	Gamma-enolase	-0.585947	-3.41351	2.94493	0.00437202
ACAA1	P09110	P09110	THIK_HUMAN	3-ketoacyl-CoA thiolase, peroxisomal	0.584517	3.99952	3.76535	0.000730942
SRP19	P09132	P09132	SRP19_HUMAN	Signal recognition particle 19 kDa protein	-0.0960378	-0.84392	0.395819	0.564272
GSTP1	P09211	P09211	GSTP1_HUMAN	Glutathione S-transferase P	0.0600762	0.400037	0.160833	0.80659
SNRPC	P09234	P09234	RU1C_HUMAN	U1 small nuclear ribonucleoprotein C	-0.344963	-3.55541	3.13718	0.0029636
LGALS1	P09382	P09382	LEG1_HUMAN	Galectin-1	-0.0312872	-0.151414	0.0554479	0.92764
QDPR	P09417	P09417	DHPR_HUMAN	Dihydropteridine reductase	0.245688	1.5623	0.909007	0.237259
HMGB1	P09429	P09429;P26583	HMGB1_HUMAN	High mobility group protein B1	-0.454445	-3.52482	3.09537	0.00324407
RBP1	P09455	P09455	RET1_HUMAN	Retinol-binding protein 1	-1.6487	-6.10938	7.13872	0
FBP1	P09467	O00757;P09467	F16P1_HUMAN	Fructose-1,6-bisphosphatase 1	1.20185	4.94555	5.21452	9.23788e-06
GNAO1	P09471	P09471	GNAO_HUMAN	Guanine nucleotide-binding protein G(o) subunit alpha	-0.372119	-1.04425	0.522266	0.462604
SPARC	P09486	P09486	SPRC_HUMAN	SPARC	-0.775383	-2.68346	2.03008	0.0278527
TPM1	P09493	P09493	TPM1_HUMAN	Tropomyosin alpha-1 chain	-0.0814924	-0.333142	0.13068	0.839299
CLTA	P09496	P09496	CLCA_HUMAN	Clathrin light chain A	0.213868	1.7428	1.06385	0.180406
CLTB	P09497	P09497	CLCB_HUMAN	Clathrin light chain B	0.65083	5.96264	6.8903	0
ANXA4	P09525	P09525	ANXA4_HUMAN	Annexin A4	0.79275	4.5491	4.59122	0.00012398
CNP	P09543	P09543	CN37_HUMAN	2',3'-cyclic-nucleotide 3'-phosphodiesterase	0.235586	2.41502	1.72823	0.050782
HMOX1	P09601	P09601	HMOX1_HUMAN	Heme oxygenase 1	0.470191	2.58235	1.91406	0.035323
DLD	P09622	P09622	DLDH_HUMAN	Dihydrolipoyl dehydrogenase, mitochondrial	0.426233	3.18379	2.64318	0.00805223
HNRNPA1	P09651	A0A2R8Y4L2;P09651	ROA1_HUMAN	Heterogeneous nuclear ribonucleoprotein A1	-0.71702	-5.09198	5.44963	1.05263e-05
SNRPA1	P09661	P09661	RU2A_HUMAN	U2 small nuclear ribonucleoprotein A'	-0.496854	-5.58587	6.25901	0
CTSH	P09668	P09668	CATH_HUMAN	Pro-cathepsin H	0.265363	1.58863	0.930956	0.228298
COX6C	P09669	P09669	COX6C_HUMAN	Cytochrome c oxidase subunit 6C	0.676134	3.50522	3.06869	0.00343913
TACSTD2	P09758	P09758	TACD2_HUMAN	Tumor-associated calcium signal transducer 2	0.613298	2.39273	1.70407	0.0532316
C1S	P09871	P09871	C1S_HUMAN	Complement C1s subcomponent	-0.204438	-0.899895	0.429856	0.536533
PARP1	P09874	P09874	PARP1_HUMAN	Poly [ADP-ribose] polymerase 1	-0.583971	-4.07423	3.87468	0.00057277
POLA1	P09884	P09884	DPOLA_HUMAN	DNA polymerase alpha catalytic subunit	-0.0170851	-0.138495	0.0504646	0.933215
IFIT2	P09913	P09913	IFIT2_HUMAN	Interferon-induced protein with tetratricopeptide repeats 2	0.926962	3.39541	2.92072	0.00457771
IFIT1	P09914	P09914	IFIT1_HUMAN	Interferon-induced protein with tetratricopeptide repeats 1	0.882906	2.86436	2.24443	0.0182293
ALOX5	P09917	P09917	LOX5_HUMAN	Polyunsaturated fatty acid 5-lipoxygenase	0.461779	2.05843	1.35895	0.104314
UCHL1	P09936	P09936	UCHL1_HUMAN	Ubiquitin carboxyl-terminal hydrolase isozyme L1	-2.43874	-4.36955	4.31611	0.000243281
FURIN	P09958	P09958	FURIN_HUMAN	Furin	0.476166	2.74592	2.10311	0.0241621
LTA4H	P09960	P09960	LKHA4_HUMAN	Leukotriene A-4 hydrolase	-0.219894	-1.32012	0.717494	0.329118
ALDOC	P09972	P09972	ALDOC_HUMAN	Fructose-bisphosphate aldolase C	0.214965	0.957415	0.465877	0.505507
C4A	P0C0L4	P0C0L4	CO4A_HUMAN	Complement C4-A	0.0781092	0.433288	0.176324	0.787224
C4B_2	P0C0L5	Cont_P01030;P0C0L4;P0C0L5	CO4B_HUMAN	Complement C4-B	-0.279491	-1.57303	0.917928	0.233719
H2AZ1;H2AZ2	P0C0S5;Q71UI9	P0C0S5;Q71UI9	H2AV_HUMAN;H2AZ_HUMAN	Histone H2A.Z	-0.717655	-4.90102	5.14351	1.76991e-05
TFPT	P0C1Z6	P0C1Z6	TFPT_HUMAN	TCF3 fusion partner	-0.324118	-4.16051	4.00214	0.000421314
FBXO45	P0C2W1	P0C2W1	FBSP1_HUMAN	F-box/SPRY domain-containing protein 1	-0.0504674	-0.44447	0.181609	0.781058
ATXN1L	P0C7T5	P0C7T5	ATX1L_HUMAN	Ataxin-1-like	-0.430915	-2.3126	1.61838	0.0632436
PLA2G4B	P0C869	P0C869	PA24B_HUMAN	Cytosolic phospholipase A2 beta	-0.184804	-1.0853	0.549762	0.441265
JMJD7	P0C870	P0C870	JMJD7_HUMAN	Bifunctional peptidase and (3S)-lysyl hydroxylase JMJD7	-0.0893294	-0.51839	0.217505	0.743237
POLR2M	P0CAP2	P0CAP2	GRL1A_HUMAN	DNA-directed RNA polymerase II subunit GRINL1A	0.0461888	0.467432	0.19258	0.769903
DERPC	P0CG12	P0CG12	DERPC_HUMAN	Decreased expression in renal and prostate cancer protein	0.225763	1.7826	1.09937	0.169772
ZNF888	P0CJ79	P0CJ79	ZN888_HUMAN	Zinc finger protein 888	-0.464633	-3.66961	3.29499	0.00198893
SLC35E2B	P0CK96	P0CK96	S352B_HUMAN	Solute carrier family 35 member E2B	-0.0751712	-0.542438	0.229544	0.728819
LIMS3;LIMS4	P0CW19;P0CW20	P0CW19;P0CW20	LIMS3_HUMAN;LIMS4_HUMAN	LIM and senescent cell antigen-like-containing domain protein 3	0.334492	1.23539	0.65493	0.367405
TRAPPC2;TRAPPC2B	P0DI81;P0DI82	P0DI82;P0DI81	TPC2A_HUMAN;TPC2B_HUMAN	Trafficking protein particle complex subunit 2	-0.10526	-1.16747	0.606443	0.400193
PET100	P0DJ07	P0DJ07	PT100_HUMAN	Protein PET100 homolog, mitochondrial	0.147365	0.661793	0.291956	0.665359
HSPA1A;HSPA1B	P0DMV8;P0DMV9	P0DMV9;P0DMV8	HS71A_HUMAN;HS71B_HUMAN	Heat shock 70 kDa protein 1A	0.141322	1.02475	0.50939	0.471737
IGLC2	P0DOY2	P0DOY3;P0DOY2	IGLC2_HUMAN	Immunoglobulin lambda constant 2	-0.0671315	-0.267824	0.102525	0.871279
CALM1;CALM2;CALM3	P0DP23;P0DP24;P0DP25	P0DP24;P0DP25;P0DP23	CALM1_HUMAN;CALM2_HUMAN;CALM3_HUMAN	Calmodulin-1	0.0634075	0.79725	0.368203	0.589148
POLR1D	P0DPB6	P0DPB6	RPAC2_HUMAN	DNA-directed RNA polymerases I and III subunit RPAC2	0.0572719	0.847404	0.397908	0.562506
EEF1AKMT4-ECE2	P0DPD8	P0DPD7;P0DPD8	EFCE2_HUMAN	EEF1AKMT4-ECE2 readthrough transcript protein	0.417663	1.72197	1.04547	0.186276
ZFTRAF1	P0DTL6	P0DTL6;E9PQ42	ZTRF1_HUMAN	Zinc finger TRAF-type-containing protein 1	-0.128618	-1.47387	0.836914	0.269033
GLI4	P10075	P10075	GLI4_HUMAN	Zinc finger protein GLI4	-0.388817	-2.40233	1.71445	0.0521948
FDX1	P10109	P10109	ADX_HUMAN	Adrenodoxin, mitochondrial	0.177181	1.64251	0.976557	0.211638
RAP2A	P10114	P10114	RAP2A_HUMAN	Ras-related protein Rap-2a	-0.0121479	-0.111488	0.0402007	0.947578
RO60	P10155	P10155	RO60_HUMAN	RNA-binding protein RO60	-0.48918	-4.26884	4.16396	0.000291777
GAA	P10253	P10253	LYAG_HUMAN	Lysosomal alpha-glucosidase	-0.021779	-0.0885889	0.0316599	0.959241
RRAS	P10301	P10301	RRAS_HUMAN	Ras-related protein R-Ras	-0.0459111	-0.298819	0.115727	0.855825
HLA-C	P10321	P10321	HLAC_HUMAN	HLA class I histocompatibility antigen, C alpha chain	1.20823	4.15582	3.99519	0.000420792
ARAF	P10398	P10398	ARAF_HUMAN	Serine/threonine-protein kinase A-Raf	0.138743	1.33809	0.731059	0.321893
H1-4	P10412	Q02539;P16402;P10412;P16401;P16403	H14_HUMAN	Histone H1.4	-0.658714	-5.33435	5.84391	0
DLAT	P10515	P10515	ODP2_HUMAN	Dihydrolipoyllysine-residue acetyltransferase component of pyruvate dehydrogenase complex, mitochondrial	0.0336782	0.2648	0.101252	0.872452
PTPRF	P10586	P10586	PTPRF_HUMAN	Receptor-type tyrosine-protein phosphatase F	0.261068	1.70465	1.03027	0.19188
NR2F6	P10588	P10588	NR2F6_HUMAN	Nuclear receptor subfamily 2 group F member 6	-0.631981	-5.22223	5.66078	1.16618e-05
TXN	P10599	P10599	THIO_HUMAN	Thioredoxin	0.125839	0.783266	0.360063	0.596469
COX5B	P10606	P10606	COX5B_HUMAN	Cytochrome c oxidase subunit 5B, mitochondrial	0.395541	3.00037	2.41113	0.012907
CTSA	P10619	P10619	PPGB_HUMAN	Lysosomal protective protein	-0.0691605	-0.416011	0.168234	0.797091
C7	P10643	P10643	CO7_HUMAN	Complement component C7	-0.282544	-1.27121	0.681094	0.351332
PRKAR1A	P10644	P10644	KAP0_HUMAN	cAMP-dependent protein kinase type I-alpha regulatory subunit	0.050579	0.354931	0.140354	0.829167
UROS	P10746	P10746	HEM4_HUMAN	Uroporphyrinogen-III synthase	-0.117312	-1.37441	0.758798	0.306568
ESD	P10768	P10768	ESTD_HUMAN	S-formylglutathione hydrolase	0.0170591	0.146747	0.0536423	0.929636
HSPD1	P10809	P10809	CH60_HUMAN	60 kDa heat shock protein, mitochondrial	-0.40904	-2.46288	1.78058	0.0459529
CLU	P10909	P10909	CLUS_HUMAN	Clusterin	0.319157	1.13595	0.58444	0.416163
HSPA5	P11021	P11021	BIP_HUMAN	Endoplasmic reticulum chaperone BiP	0.33734	2.57832	1.9095	0.0357318
LAMC1	P11047	P11047	LAMC1_HUMAN	Laminin subunit gamma-1	-0.626278	-3.24022	2.71619	0.00690107
ACP2	P11117	P11117	PPAL_HUMAN	Lysosomal acid phosphatase	0.0982511	0.589151	0.253443	0.706255
MAP2	P11137	P11137	MTAP2_HUMAN	Microtubule-associated protein 2	-0.923836	-2.74623	2.10348	0.0241494
HSPA8	P11142	P11142;P54652	HSP7C_HUMAN	Heat shock cognate 71 kDa protein	-0.0310657	-0.323576	0.126477	0.84492
SLC2A1	P11166	P11166	GTR1_HUMAN	Solute carrier family 2, facilitated glucose transporter member 1	-0.402449	-1.64788	0.981146	0.209736
EPB41	P11171	P11171	EPB41_HUMAN	Protein 4.1	-0.115065	-0.851602	0.400431	0.560516
UMPS	P11172	P11172	UMPS_HUMAN	Uridine 5'-monophosphate synthase	-0.138322	-1.23094	0.651707	0.369352
PDHB	P11177	P11177	ODPB_HUMAN	Pyruvate dehydrogenase E1 component subunit beta, mitochondrial	0.0220288	0.136559	0.0497218	0.933927
DBT	P11182	P11182	ODB2_HUMAN	Lipoamide acyltransferase component of branched-chain alpha-keto acid dehydrogenase complex, mitochondrial	0.107661	0.808871	0.375014	0.583605
ITGAM	P11215	P11215	ITAM_HUMAN	Integrin alpha-M	0.635012	2.15407	1.45433	0.0873545
PYGB	P11216	P06737;P11217;P11216	PYGB_HUMAN	Glycogen phosphorylase, brain form	0.139679	0.743467	0.337235	0.619629
PYGM	P11217	P11217	PYGM_HUMAN	Glycogen phosphorylase, muscle form	0.23322	1.27282	0.682281	0.35054
RALA	P11233	P11233	RALA_HUMAN	Ras-related protein Ral-A	-0.0174863	-0.155927	0.0572001	0.925609
RALB	P11234	P11234	RALB_HUMAN	Ras-related protein Ral-B	-0.24993	-2.17186	1.47237	0.0841325
BCR	P11274	P11274	BCR_HUMAN	Breakpoint cluster region protein	0.111508	0.990948	0.487365	0.488695
SPTB	P11277	P11277	SPTB1_HUMAN	Spectrin beta chain, erythrocytic	-0.129944	-0.639013	0.279702	0.679548
LAMP1	P11279	P11279	LAMP1_HUMAN	Lysosome-associated membrane glycoprotein 1	0.113229	0.768217	0.351372	0.605916
ACADM	P11310	P11310	ACADM_HUMAN	Medium-chain specific acyl-CoA dehydrogenase, mitochondrial	-0.0808777	-0.401561	0.161536	0.805574
TOP1	P11387	P11387	TOP1_HUMAN	DNA topoisomerase 1	-0.600731	-4.39469	4.35434	0.000243478
TOP2A	P11388	P11388	TOP2A_HUMAN	DNA topoisomerase 2-alpha	-1.04132	-3.72624	3.37424	0.00162049
G6PD	P11413	P11413	G6PD_HUMAN	Glucose-6-phosphate 1-dehydrogenase	0.0479239	0.297743	0.115264	0.856433
UBL4A	P11441	P11441	UBL4A_HUMAN	Ubiquitin-like protein 4A	0.107026	1.13579	0.584336	0.416073
ESRRA	P11474	P11474	ERR1_HUMAN	Steroid hormone receptor ERR1	-0.0326716	-0.199806	0.0745405	0.902929
PC	P11498	P11498	PYC_HUMAN	Pyruvate carboxylase, mitochondrial	0.0755937	0.373457	0.148691	0.820637
DMD	P11532	P11532	DMD_HUMAN	Dystrophin	0.0127177	0.0660645	0.0234029	0.969699
MTHFD1	P11586	P11586	C1TC_HUMAN	C-1-tetrahydrofolate synthase, cytoplasmic	-0.00314597	-0.0228698	0.00796477	0.990351
IGF2R	P11717	P11717	MPRI_HUMAN	Cation-independent mannose-6-phosphate receptor	-0.134583	-1.10317	0.561903	0.432247
ADH5	P11766	P11766	ADHX_HUMAN	Alcohol dehydrogenase class-3	-0.294689	-2.39787	1.70963	0.0526524
CDK4	P11802	P11802	CDK4_HUMAN	Cyclin-dependent kinase 4	-0.341223	-2.77714	2.14001	0.0224017
PRPS2	P11908	P21108;P11908;P60891	PRPS2_HUMAN	Ribose-phosphate pyrophosphokinase 2	0.107889	0.864569	0.408259	0.553844
PABPC1	P11940	P11940;Q4VXU2	PABP1_HUMAN	Polyadenylate-binding protein 1	-0.17404	-1.55828	0.905677	0.238169
PCNA	P12004	P12004	PCNA_HUMAN	Proliferating cell nuclear antigen	-0.433481	-2.17979	1.48045	0.0828654
HARS1	P12081	P12081;P49590	HARS1_HUMAN	Histidine--tRNA ligase, cytoplasmic	0.277706	2.25294	1.55578	0.0713683
COL6A1	P12109	P12109	CO6A1_HUMAN	Collagen alpha-1(VI) chain	-0.243312	-0.729068	0.3291	0.628646
COL6A2	P12110	P12110	CO6A2_HUMAN	Collagen alpha-2(VI) chain	-0.386923	-0.937082	0.453023	0.516739
COL6A3	P12111	P12111	CO6A3_HUMAN	Collagen alpha-3(VI) chain	-0.316661	-0.876917	0.415763	0.547901
SLC25A4	P12235	P12235	ADT1_HUMAN	ADP/ATP translocase 1	-0.223492	-1.27879	0.686689	0.347801
SLC25A6	P12236	P12236	ADT3_HUMAN	ADP/ATP translocase 3	-0.0737795	-0.374454	0.149143	0.820202
IMPDH2	P12268	P12268	IMDH2_HUMAN	Inosine-5'-monophosphate dehydrogenase 2	-0.0497129	-0.360997	0.143073	0.826094
TPR	P12270	P12270	TPR_HUMAN	Nucleoprotein TPR	-0.384138	-4.85986	5.07809	2.54237e-05
PIP	P12273	P12273	PIP_HUMAN	Prolactin-inducible protein	-0.0490878	-0.198759	0.0741201	0.903513
CKB	P12277	P12277	KCRB_HUMAN	Creatine kinase B-type	-0.86866	-2.56082	1.88972	0.037226
ANXA3	P12429	P12429	ANXA3_HUMAN	Annexin A3	-0.327757	-1.08539	0.549823	0.441298
CKMT1B	P12532	P12532	KCRU_HUMAN	Creatine kinase U-type, mitochondrial	0.782289	1.91948	1.22528	0.133534
BCKDHA	P12694	P12694	ODBA_HUMAN	2-oxoisovalerate dehydrogenase subunit alpha, mitochondrial	-0.0979503	-0.706651	0.316565	0.640446
ACTN1	P12814	P12814;P35609	ACTN1_HUMAN	Alpha-actinin-1	0.163643	1.24526	0.662098	0.362502
ACE	P12821	P12821	ACE_HUMAN	Angiotensin-converting enzyme	0.205675	0.863303	0.407492	0.554268
MYL4	P12829	P12829	MYL4_HUMAN	Myosin light chain 4	-0.22415	-0.559253	0.238069	0.721276
CDH1	P12830	P12830	CADH1_HUMAN	Cadherin-1	0.729226	3.77875	3.44827	0.00143731
SRC	P12931	P12931;P07947;P06241	SRC_HUMAN	Proto-oncogene tyrosine-protein kinase Src	-0.0764589	-0.724386	0.326469	0.630903
PEPD	P12955	P12955	PEPD_HUMAN	Xaa-Pro dipeptidase	-0.295391	-1.75271	1.07265	0.177726
XRCC6	P12956	P12956	XRCC6_HUMAN	X-ray repair cross-complementing protein 6	-0.480265	-4.1555	3.9947	0.000425216
XRCC5	P13010	P13010	XRCC5_HUMAN	X-ray repair cross-complementing protein 5	-0.444371	-4.33739	4.26735	0.000249653
UNG	P13051	P13051	UNG_HUMAN	Uracil-DNA glycosylase	-0.64099	-4.41101	4.37921	0.000235294
COX4I1	P13073	P13073	COX41_HUMAN	Cytochrome c oxidase subunit 4 isoform 1, mitochondrial	0.3971	2.83378	2.2076	0.0195305
LAMP2	P13473	P13473	LAMP2_HUMAN	Lysosome-associated membrane glycoprotein 2	0.425624	2.73613	2.0916	0.0246787
RNH1	P13489	P13489	RINI_HUMAN	Ribonuclease inhibitor	0.0701794	0.493245	0.205107	0.756915
NCAM1	P13591	P13591	NCAM1_HUMAN	Neural cell adhesion molecule 1	-0.90766	-2.59029	1.92307	0.0347626
VCAN	P13611	P13611	CSPG2_HUMAN	Versican core protein	-0.631515	-1.43628	0.807013	0.283319
EEF2	P13639	P13639	EF2_HUMAN	Elongation factor 2	0.0607729	0.558103	0.237483	0.721883
PDIA4	P13667	P13667	PDIA4_HUMAN	Protein disulfide-isomerase A4	0.0750162	0.434844	0.177057	0.786596
C6	P13671	P13671	CO6_HUMAN	Complement component C6	-0.215943	-0.923862	0.444736	0.523556
P4HA1	P13674	P13674	P4HA1_HUMAN	Prolyl 4-hydroxylase subunit alpha-1	0.294996	1.5998	0.940338	0.224711
TPT1	P13693	Q56UQ5;P13693	TCTP_HUMAN	Translationally-controlled tumor protein	0.0976621	0.792391	0.365367	0.59219
ALAD	P13716	P13716	HEM2_HUMAN	Delta-aminolevulinic acid dehydratase	0.13088	0.970425	0.474171	0.498878
HLA-E	P13747	P13747	HLAE_HUMAN	HLA class I histocompatibility antigen, alpha chain E	0.582051	3.11239	2.55189	0.00966028
LCP1	P13796	P13796	PLSL_HUMAN	Plastin-2	0.251669	0.85653	0.403399	0.557647
PLS3	P13797	P13797	PLST_HUMAN	Plastin-3	0.920286	4.78654	4.96206	2.38569e-05
APEH	P13798	P13798	ACPH_HUMAN	Acylamino-acid-releasing enzyme	0.301493	1.86245	1.17212	0.148387
ETFA	P13804	P13804	ETFA_HUMAN	Electron transfer flavoprotein subunit alpha, mitochondrial	0.283348	2.09273	1.39284	0.0978561
GYS1	P13807	P13807	GYS1_HUMAN	Glycogen [starch] synthase, muscle	0.315429	2.15194	1.45217	0.0877417
PRKAR2A	P13861	P13861	KAP2_HUMAN	cAMP-dependent protein kinase type II-alpha regulatory subunit	0.0728988	0.727999	0.328499	0.629285
GTF2F2	P13984	P13984	T2FB_HUMAN	General transcription factor IIF subunit 2	-0.404541	-4.16845	4.01394	0.000402985
CD59	P13987	P13987	CD59_HUMAN	CD59 glycoprotein	0.236137	1.42289	0.796474	0.288675
MTHFD2	P13995	P13995	MTDC_HUMAN	Bifunctional methylenetetrahydrofolate dehydrogenase/cyclohydrolase, mitochondrial	-0.375262	-2.21798	1.51958	0.0767026
MIF	P14174	P14174	MIF_HUMAN	Macrophage migration inhibitory factor	-0.784961	-1.95212	1.25615	0.126391
CD99	P14209	P14209	CD99_HUMAN	CD99 antigen	0.834448	3.72831	3.37714	0.0016099
PRKCSH	P14314	P14314	GLU2B_HUMAN	Glucosidase 2 subunit beta	-0.575933	-3.19007	2.65127	0.00791718
HCLS1	P14317	P14317	HCLS1_HUMAN	Hematopoietic lineage cell-specific protein	0.662295	1.95734	1.26112	0.125379
FDPS	P14324	P14324	FPPS_HUMAN	Farnesyl pyrophosphate synthase	-0.024234	-0.133385	0.0485067	0.93555
TRIM27	P14373	P14373	TRI27_HUMAN	Zinc finger protein RFP	-0.407718	-2.71499	2.06682	0.0259383
CPM	P14384	P14384	CBPM_HUMAN	Carboxypeptidase M	0.417513	1.76731	1.08567	0.173859
COX7A2	P14406	P14406	CX7A2_HUMAN	Cytochrome c oxidase subunit 7A2, mitochondrial	0.663663	3.03317	2.45203	0.0118593
NID1	P14543	P14543	NID1_HUMAN	Nidogen-1	-0.370775	-1.38908	0.77012	0.300965
AKR1A1	P14550	P14550	AK1A1_HUMAN	Aldo-keto reductase family 1 member A1	0.229548	1.57632	0.920671	0.232731
PKM	P14618	P14618	KPYM_HUMAN	Pyruvate kinase PKM	0.0957935	0.72648	0.327645	0.630061
ACYP2	P14621	P14621	ACYP2_HUMAN	Acylphosphatase-2	-0.0929611	-0.580674	0.249056	0.709974
HSP90B1	P14625	P14625	ENPL_HUMAN	Endoplasmin	-0.0466254	-0.353936	0.139909	0.829656
CCNB1	P14635	P14635	CCNB1_HUMAN	G2/mitotic-specific cyclin-B1	-0.79751	-3.38799	2.91083	0.00468804
MYL6B	P14649	P14649	MYL6B_HUMAN	Myosin light chain 6B	-0.465637	-3.92494	3.65722	0.000956056
SNRPB	P14678	P14678	RSMB_HUMAN	Small nuclear ribonucleoprotein-associated proteins B and B'	-0.486191	-6.46386	7.74358	0
IDE	P14735	P14735	IDE_HUMAN	Insulin-degrading enzyme	-0.0618384	-0.572332	0.244761	0.713727
COX6B1	P14854	P14854	CX6B1_HUMAN	Cytochrome c oxidase subunit 6B1	0.291437	1.69633	1.02301	0.194417
POU2F1	P14859	P14859;Q9UKI9	PO2F1_HUMAN	POU domain, class 2, transcription factor 1	-0.816093	-9.97039	13.7765	0
HNRNPL	P14866	P14866	HNRPL_HUMAN	Heterogeneous nuclear ribonucleoprotein L	-0.667217	-4.87841	5.10754	1.73536e-05
DARS1	P14868	P14868	SYDC_HUMAN	Aspartate--tRNA ligase, cytoplasmic	-0.0394359	-0.436546	0.17786	0.785698
JUP	P14923	P14923	PLAK_HUMAN	Junction plakoglobin	0.0972395	0.726894	0.327877	0.629788
UQCRB	P14927	P14927	QCR7_HUMAN	Cytochrome b-c1 complex subunit 7	0.449194	2.45347	1.77024	0.0470353
BRAF	P15056	P15056	BRAF_HUMAN	Serine/threonine-protein kinase B-raf	0.0796589	0.715836	0.321682	0.635831
GLUL	P15104	P15104	GLNA_HUMAN	Glutamine synthetase	0.167382	0.844477	0.396153	0.563968
AKR1B1	P15121	P15121	ALDR_HUMAN	Aldo-keto reductase family 1 member B1	-1.03898	-5.66725	6.39448	0
ANPEP	P15144	P15144	AMPN_HUMAN	Aminopeptidase N	0.522011	1.4108	0.787012	0.292814
PVR	P15151	P15151	PVR_HUMAN	Poliovirus receptor	0.28148	1.13118	0.581145	0.418518
RAC2	P15153	P15153	RAC2_HUMAN	Ras-related C3 botulinum toxin substrate 2	0.878106	3.39575	2.92118	0.00457816
GSPT1	P15170	P15170	ERF3A_HUMAN	Eukaryotic peptide chain release factor GTP-binding subunit ERF3A	-0.0511151	-0.426346	0.173062	0.791254
PGAM2	P15259	P15259	PGAM2_HUMAN	Phosphoglycerate mutase 2	0.0474114	0.26564	0.101605	0.872287
ARSA	P15289	P15289	ARSA_HUMAN	Arylsulfatase A	0.318623	1.46479	0.829651	0.272562
B4GALT1	P15291	P15291	B4GT1_HUMAN	Beta-1,4-galactosyltransferase 1	0.798246	5.67342	6.40477	0
ACP3	P15309	P15309	PPAP_HUMAN	Prostatic acid phosphatase	0.0516852	0.266521	0.101976	0.872096
EZR	P15311	P15311	EZRI_HUMAN	Ezrin	-0.185684	-1.10611	0.563913	0.431007
ATP6V1B1	P15313	P15313	VATB1_HUMAN	V-type proton ATPase subunit B, kidney isoform	-0.0289335	-0.111261	0.0401152	0.947479
FOLR1	P15328	P15328	FOLR1_HUMAN	Folate receptor alpha	0.315884	0.729526	0.329358	0.628397
ATF2	P15336	P15336	ATF2_HUMAN	Cyclic AMP-dependent transcription factor ATF-2	-0.197727	-2.57414	1.90476	0.0361339
UCHL3	P15374	P15374	UCHL3_HUMAN	Ubiquitin carboxyl-terminal hydrolase isozyme L3	0.199218	1.8062	1.12067	0.163144
FOSL2	P15408	P15408	FOSL2_HUMAN	Fos-related antigen 2	-0.200004	-1.38296	0.76539	0.303388
CD46	P15529	P15529	MCP_HUMAN	Membrane cofactor protein	0.125452	0.526602	0.221596	0.738676
NME1	P15531	P15531	NDKA_HUMAN	Nucleoside diphosphate kinase A	0.00807417	0.0498641	0.0175519	0.97817
NQO1	P15559	P15559	NQO1_HUMAN	NAD(P)H dehydrogenase [quinone] 1	1.6296	4.10263	3.91649	0.000534296
GNS	P15586	P15586	GNS_HUMAN	N-acetylglucosamine-6-sulfatase	-0.130771	-0.907598	0.434619	0.531977
PHKG2	P15735	P15735	PHKG2_HUMAN	Phosphorylase b kinase gamma catalytic chain, liver/testis isoform	0.16603	1.36005	0.74778	0.312496
RPS2	P15880	P15880	RS2_HUMAN	Small ribosomal subunit protein uS5	-0.0265681	-0.344253	0.135595	0.833666
DSP	P15924	P15924	DESP_HUMAN	Desmoplakin	0.0955954	0.620758	0.269998	0.689664
RPA2	P15927	P15927	RFA2_HUMAN	Replication protein A 32 kDa subunit	-0.327743	-3.10762	2.54583	0.00976548
MUC1	P15941	P15941	MUC1_HUMAN	Mucin-1	0.520409	2.00454	1.30641	0.115187
NPR1	P16066	P16066	ANPRA_HUMAN	Atrial natriuretic peptide receptor 1	0.565257	2.72911	2.08336	0.0251061
CD44	P16070	P16070	CD44_HUMAN	CD44 antigen	0.933632	3.81175	3.49509	0.00129828
NQO2	P16083	P16083	NQO2_HUMAN	Ribosyldihydronicotinamide dehydrogenase [quinone]	-0.205712	-0.710839	0.318895	0.63849
ITGB4	P16144	P16144	ITB4_HUMAN	Integrin beta-4	0.626087	3.75591	3.416	0.0014743
CBR1	P16152	P16152	CBR1_HUMAN	Carbonyl reductase [NADPH] 1	0.413159	2.61005	1.94557	0.0333168
ACADS	P16219	P16219	ACADS_HUMAN	Short-chain specific acyl-CoA dehydrogenase, mitochondrial	0.17433	0.879407	0.417282	0.547237
CREB1	P16220	P18846;P16220	CREB1_HUMAN	Cyclic AMP-responsive element-binding protein 1	-0.543482	-6.24068	7.36204	0
GLB1	P16278	P16278	BGAL_HUMAN	Beta-galactosidase	-0.172286	-0.888057	0.422574	0.543394
PPP3CB	P16298	P16298	PP2BB_HUMAN	Serine/threonine-protein phosphatase 2B catalytic subunit beta isoform	0.111687	1.11002	0.566586	0.429515
NCK1	P16333	P16333	NCK1_HUMAN	Cytoplasmic protein NCK1	0.107293	1.32403	0.720436	0.327478
GCFC2	P16383	P16383	GCFC2_HUMAN	Intron Large complex component GCFC2	-0.210313	-2.16131	1.46166	0.0860116
H1-5	P16401	P16401	H15_HUMAN	Histone H1.5	-0.727003	-4.65018	4.74815	7.18133e-05
EPCAM	P16422	P16422	EPCAM_HUMAN	Epithelial cell adhesion molecule	0.187388	1.07702	0.544172	0.446133
POR	P16435	P16435	NCPR_HUMAN	NADPH--cytochrome P450 reductase	0.27306	2.31375	1.6196	0.0630973
MGMT	P16455	P16455	MGMT_HUMAN	Methylated-DNA--protein-cysteine methyltransferase	-0.0820724	-0.502315	0.209556	0.752177
ATP2A2	P16615	P16615	AT2A2_HUMAN	Sarcoplasmic/endoplasmic reticulum calcium ATPase 2	0.0589651	0.572127	0.244655	0.713637
PLCG2	P16885	P16885	PLCG2_HUMAN	1-phosphatidylinositol 4,5-bisphosphate phosphodiesterase gamma-2	0.0807538	0.713718	0.3205	0.637006
FAH	P16930	P16930	FAAA_HUMAN	Fumarylacetoacetase	-0.0384928	-0.177153	0.0655187	0.915148
STMN1	P16949	P16949	STMN1_HUMAN	Stathmin	-1.07385	-4.62584	4.71023	9.12281e-05
YBX3	P16989	P16989	YBOX3_HUMAN	Y-box-binding protein 3	0.116139	0.812263	0.377011	0.581466
ZNF22	P17026	P17026	ZNF22_HUMAN	Zinc finger protein 22	-0.433077	-3.29267	2.7847	0.00611538
ZNF24	P17028	P17028	ZNF24_HUMAN	Zinc finger protein 24	-0.54692	-5.57267	6.23709	0
ZKSCAN1	P17029	P17029	ZKSC1_HUMAN	Zinc finger protein with KRAB and SCAN domains 1	-0.45263	-3.6741	3.30125	0.00196673
ZNF26	P17031	P17031	ZNF26_HUMAN	Zinc finger protein 26	0.042473	0.117531	0.0424791	0.943823
NAGA	P17050	P17050	NAGAB_HUMAN	Alpha-N-acetylgalactosaminidase	0.0348423	0.172318	0.0636124	0.917264
HSPA6	P17066	P48741;P17066	HSP76_HUMAN	Heat shock 70 kDa protein 6	0.21803	3.58501	3.17782	0.00266432
HMGA1	P17096	P17096	HMGA1_HUMAN	High mobility group protein HMG-I/HMG-Y	-0.873128	-3.99084	3.75271	0.000766147
TMEM11	P17152	P17152	TMM11_HUMAN	Transmembrane protein 11, mitochondrial	-0.300773	-2.76987	2.13139	0.022789
GOT1	P17174	P17174	AATC_HUMAN	Aspartate aminotransferase, cytoplasmic	0.180417	1.25644	0.670256	0.357137
PRKCA	P17252	P17252	KPCA_HUMAN	Protein kinase C alpha type	-0.0108066	-0.0543815	0.0191761	0.976102
ITGA2	P17301	P17301	ITA2_HUMAN	Integrin alpha-2	0.331522	1.65279	0.985359	0.208362
UBTF	P17480	P17480	UBF1_HUMAN	Nucleolar transcription factor 1	-0.41621	-3.92912	3.66325	0.000949517
JUND	P17535	P17535	JUND_HUMAN	Transcription factor JunD	-0.323851	-2.49349	1.81441	0.0429917
CKMT2	P17540	P17540	KCRS_HUMAN	Creatine kinase S-type, mitochondrial	0.0782211	0.315282	0.122855	0.848531
PRKACA	P17612	P22694;P17612	KAPCA_HUMAN	cAMP-dependent protein kinase catalytic subunit alpha	-0.178702	-1.96916	1.27239	0.123057
CAPN2	P17655	P17655	CAN2_HUMAN	Calpain-2 catalytic subunit	0.469458	3.52945	3.10168	0.00317687
DES	P17661	P17661	DESM_HUMAN	Desmin	-0.75373	-1.68909	1.01671	0.19696
CEBPB	P17676	P17676	CEBPB_HUMAN	CCAAT/enhancer-binding protein beta	-0.389975	-1.94836	1.25257	0.127164
HLA-G	P17693	P17693	HLAG_HUMAN	HLA class I histocompatibility antigen, alpha chain G	1.79856	6.25794	7.39147	0
PTPN2	P17706	P17706	PTN2_HUMAN	Tyrosine-protein phosphatase non-receptor type 2	-0.29073	-3.25417	2.73435	0.00667626
CTPS1	P17812	Q9NRF8;P17812	PYRG1_HUMAN	CTP synthase 1	0.00667822	0.0480881	0.016915	0.978982
ENG	P17813	P17813	EGLN_HUMAN	Endoglin	-0.058639	-0.236731	0.0895647	0.885287
DDX5	P17844	P17844	DDX5_HUMAN	Probable ATP-dependent RNA helicase DDX5	-0.695038	-3.11353	2.55334	0.00964768
PFKL	P17858	P08237;P17858	PFKAL_HUMAN	ATP-dependent 6-phosphofructokinase, liver type	0.0617825	0.471415	0.1945	0.767699
GM2A	P17900	P17900	SAP3_HUMAN	Ganglioside GM2 activator	0.30989	2.50021	1.82187	0.0423885
LGALS3	P17931	P17931	LEG3_HUMAN	Galectin-3	1.10493	4.43573	4.41695	0.000204204
PSMC3	P17980	P17980	PRS6A_HUMAN	26S proteasome regulatory subunit 6A	-0.151276	-2.04204	1.34288	0.107435
TCP1	P17987	P17987	TCPA_HUMAN	T-complex protein 1 subunit alpha	-0.0992426	-0.920454	0.44261	0.525236
PTPN1	P18031	P18031	PTN1_HUMAN	Tyrosine-protein phosphatase non-receptor type 1	0.189806	1.40032	0.778844	0.296355
IGFBP2	P18065	Cont_P13384;P18065	IBP2_HUMAN	Insulin-like growth factor-binding protein 2	-0.905062	-3.27426	2.76058	0.00638714
ERCC2	P18074	P18074	ERCC2_HUMAN	General transcription and DNA repair factor IIH helicase subunit XPD	-0.209475	-3.19774	2.66116	0.00777254
RPL35A	P18077	P18077	RL35A_HUMAN	Large ribosomal subunit protein eL33	-0.00635927	-0.071439	0.0253601	0.96737
ITGB5	P18084	P18084	ITB5_HUMAN	Integrin beta-5	0.0527094	0.370331	0.147277	0.822047
ARF4	P18085	P18085	ARF4_HUMAN	ADP-ribosylation factor 4	0.215962	2.54981	1.87731	0.0380382
RPL7	P18124	P18124	RL7_HUMAN	Large ribosomal subunit protein uL30	0.0629197	0.71037	0.318634	0.638628
VCL	P18206	P18206	VINC_HUMAN	Vinculin	-0.112613	-0.851418	0.40032	0.560432
LBP	P18428	P18428	LBP_HUMAN	Lipopolysaccharide-binding protein	-0.475977	-2.7783	2.14138	0.0223545
PTPRA	P18433	P18433	PTPRA_HUMAN	Receptor-type tyrosine-protein phosphatase alpha	0.199679	1.79473	1.11029	0.166319
NAT1	P18440	P18440	ARY1_HUMAN	Arylamine N-acetyltransferase 1	0.409646	1.94467	1.24907	0.127785
ITGB6	P18564	P18564	ITB6_HUMAN	Integrin beta-6	-0.0976712	-0.64789	0.284458	0.674278
SON	P18583	P18583	SON_HUMAN	Protein SON	-0.429588	-4.87378	5.10018	1.71674e-05
NELFE	P18615	P18615	NELFE_HUMAN	Negative elongation factor E	-0.642767	-5.77281	6.57095	0
RPL17	P18621	P18621	RL17_HUMAN	Large ribosomal subunit protein uL22	-0.10956	-0.927433	0.446969	0.521407
PGAM1	P18669	P18669	PGAM1_HUMAN	Phosphoglycerate mutase 1	-0.0550229	-0.316518	0.123394	0.847729
RCC1	P18754	P18754	RCC1_HUMAN	Regulator of chromosome condensation	-0.223772	-1.38501	0.766969	0.302502
SDC1	P18827	P18827	SDC1_HUMAN	Syndecan-1	0.337019	1.15636	0.598651	0.405862
ATF6	P18850	P18850	ATF6A_HUMAN	Cyclic AMP-dependent transcription factor ATF-6 alpha	-0.0788673	-0.784501	0.360779	0.595705
LIG1	P18858	P18858	DNLI1_HUMAN	DNA ligase 1	-0.505519	-3.89636	3.61605	0.00103062
ATP5PF	P18859	P18859	ATP5J_HUMAN	ATP synthase-coupling factor 6, mitochondrial	0.0229317	0.158794	0.058316	0.92423
XRCC1	P18887	P18887	XRCC1_HUMAN	DNA repair protein XRCC1	-0.459686	-4.90881	5.15591	8.88889e-06
PAM	P19021	P19021	AMD_HUMAN	Peptidyl-glycine alpha-amidating monooxygenase	-0.989418	-4.9604	5.23824	9.43396e-06
CDH2	P19022	P19022	CADH2_HUMAN	Cadherin-2	-1.55417	-4.57228	4.62709	0.000106667
PLCG1	P19174	P19174	PLCG1_HUMAN	1-phosphatidylinositol 4,5-bisphosphate phosphodiesterase gamma-1	-0.695054	-4.94735	5.21738	9.28074e-06
NCL	P19338	P19338	NUCL_HUMAN	Nucleolin	-0.50827	-5.26704	5.73382	1.22699e-05
HK1	P19367	P19367	HXK1_HUMAN	Hexokinase-1	-0.0730916	-0.599926	0.259052	0.700179
POLR2C	P19387	P19387	RPB3_HUMAN	DNA-directed RNA polymerase II subunit RPB3	-0.403066	-5.03565	5.3589	1.00756e-05
POLR2E	P19388	P19388	RPAB1_HUMAN	DNA-directed RNA polymerases I, II, and III subunit RPABC1	-0.299442	-3.70726	3.34761	0.0017277
NDUFV2	P19404	P19404	NDUV2_HUMAN	NADH dehydrogenase [ubiquinone] flavoprotein 2, mitochondrial	0.279459	2.25468	1.55759	0.0710382
ELK1	P19419	P19419	ELK1_HUMAN	ETS domain-containing protein Elk-1	-0.360795	-1.89705	1.20425	0.139173
ERCC3	P19447	P19447	ERCC3_HUMAN	General transcription and DNA repair factor IIH helicase subunit XPB	-0.254449	-4.35517	4.29429	0.000246154
TRIM21	P19474	P19474	RO52_HUMAN	E3 ubiquitin-protein ligase TRIM21	0.410716	3.36401	2.8789	0.00503692
EIF2AK2	P19525	P19525	E2AK2_HUMAN	Interferon-induced, double-stranded RNA-activated protein kinase	-0.0308436	-0.243415	0.0923265	0.882599
TFE3	P19532	P19532	TFE3_HUMAN	Transcription factor E3	-0.136738	-1.18519	0.618945	0.391943
WT1	P19544	P19544	WT1_HUMAN	Wilms tumor protein	-0.614485	-2.34588	1.65374	0.0588861
SRM	P19623	P19623	SPEE_HUMAN	Spermidine synthase	-0.0908133	-0.550233	0.233485	0.726115
ORM2	P19652	P19652	A1AG2_HUMAN	Alpha-1-acid glycoprotein 2	-0.318392	-1.6204	0.957734	0.21886
CSNK2A2	P19784	P19784	CSK22_HUMAN	Casein kinase II subunit alpha'	-0.0358808	-0.385656	0.154238	0.814309
ITIH2	P19823	P19823	ITIH2_HUMAN	Inter-alpha-trypsin inhibitor heavy chain H2	-0.366688	-1.93479	1.23971	0.129927
ITIH1	P19827	P19827	ITIH1_HUMAN	Inter-alpha-trypsin inhibitor heavy chain H1	-0.248206	-1.30088	0.703087	0.338268
NFKB1	P19838	P19838	NFKB1_HUMAN	Nuclear factor NF-kappa-B p105 subunit	0.586755	4.83405	5.03716	2.47423e-05
TYMP	P19971	P19971	TYPH_HUMAN	Thymidine phosphorylase	1.28633	4.83223	5.03427	2.46914e-05
ATP2B1	P20020	P20020	AT2B1_HUMAN	Plasma membrane calcium-transporting ATPase 1	-0.309728	-1.98892	1.29134	0.118489
HLA-DPA1	P20036	P20036	DPA1_HUMAN	HLA class II histocompatibility antigen, DP alpha 1 chain	1.59774	4.99383	5.29176	9.7561e-06
EIF2S2	P20042	P20042	IF2B_HUMAN	Eukaryotic translation initiation factor 2 subunit 2	0.174446	1.69961	1.02587	0.19341
ANXA7	P20073	P20073	ANXA7_HUMAN	Annexin A7	0.306278	2.51278	1.83586	0.0413196
TBP	P20226	Q6SJ96;P20226	TBP_HUMAN	TATA-box-binding protein	-0.701072	-5.11298	5.48356	1.06667e-05
TPSAB1;TPSB2	P20231;Q15661	Q15661;P20231	TRYB1_HUMAN;TRYB2_HUMAN	Tryptase beta-2	-0.841073	-2.18826	1.48908	0.0813768
BTF3	P20290	P20290	BTF3_HUMAN	Transcription factor BTF3	-0.119552	-0.979468	0.479968	0.49471
ALOX5AP	P20292	P20292	AL5AP_HUMAN	Arachidonate 5-lipoxygenase-activating protein	1.63714	3.64962	3.26717	0.00214936
RAB4A	P20338	P20338	RAB4A_HUMAN	Ras-related protein Rab-4A	0.520876	4.57215	4.62687	0.000106489
RAB5A	P20339	P20339	RAB5A_HUMAN	Ras-related protein Rab-5A	-0.0546763	-0.562235	0.23959	0.719453
RAB6A	P20340	Q9NRW1;P20340;Q9H0N0	RAB6A_HUMAN	Ras-related protein Rab-6A	0.155958	1.48491	0.845774	0.26499
MSH3	P20585	P20585	MSH3_HUMAN	DNA mismatch repair protein Msh3	-0.344224	-5.28816	5.76831	1.25e-05
MX1	P20591	P20591	MX1_HUMAN	Interferon-induced GTP-binding protein Mx1	1.23663	3.21316	2.68109	0.0074534
MX2	P20592	P20592	MX2_HUMAN	Interferon-induced GTP-binding protein Mx2	0.339568	1.12082	0.573997	0.424444
PSMB1	P20618	P20618	PSB1_HUMAN	Proteasome subunit beta type-1	0.124259	2.07291	1.37321	0.101474
M6PR	P20645	P20645	MPRD_HUMAN	Cation-dependent mannose-6-phosphate receptor	0.245324	2.14024	1.44037	0.0895779
H2AC7	P20671	P0C0S8;P04908;Q6FI13;P20671;Q9BTM1;Q99878;Q7L7L0;Q93077;Q16777;Q96KK5	H2A1D_HUMAN	Histone H2A type 1-D	-0.681426	-6.80757	8.33495	0
COX5A	P20674	P20674	COX5A_HUMAN	Cytochrome c oxidase subunit 5A, mitochondrial	0.353892	2.31935	1.62552	0.0622704
LMNB1	P20700	P20700	LMNB1_HUMAN	Lamin-B1	-0.632225	-5.92681	6.82984	0
OGN	P20774	P20774	MIME_HUMAN	Mimecan	-0.368593	-0.830265	0.387667	0.572277
CAST	P20810	P20810	ICAL_HUMAN	Calpastatin	0.373526	2.60217	1.93658	0.0338365
CYP3A5	P20815	P08684;P24462;P20815	CP3A5_HUMAN	Cytochrome P450 3A5	0.116428	0.45807	0.188088	0.775474
IMPDH1	P20839	P20839	IMDH1_HUMAN	Inosine-5'-monophosphate dehydrogenase 1	0.240076	1.56026	0.907321	0.237661
AGA	P20933	P20933	ASPG_HUMAN	N(4)-(beta-N-acetylglucosaminyl)-L-asparaginase	0.237928	1.26213	0.674424	0.354803
RASA1	P20936	P20936	RASA1_HUMAN	Ras GTPase-activating protein 1	-0.150399	-1.6872	1.01507	0.197623
PTMS	P20962	P20962	PTMS_HUMAN	Parathymosin	-0.769753	-4.35756	4.29792	0.000246844
CDK11B	P21127	Q9UQ88;P21127	CD11B_HUMAN	Cyclin-dependent kinase 11B	-0.392516	-3.46931	3.02001	0.00377011
GSTM3	P21266	P21266	GSTM3_HUMAN	Glutathione S-transferase Mu 3	0.124606	0.412103	0.166416	0.799446
ATP6V1B2	P21281	P21281	VATB2_HUMAN	V-type proton ATPase subunit B, brain isoform	0.00616787	0.0601955	0.0212748	0.973366
ATP6V1C1	P21283	P21283	VATC1_HUMAN	V-type proton ATPase subunit C 1	0.163507	1.7763	1.09372	0.171746
CSRP1	P21291	P21291	CSRP1_HUMAN	Cysteine and glycine-rich protein 1	-0.328548	-1.60909	0.948167	0.2216
FLNA	P21333	P21333	FLNA_HUMAN	Filamin-A	-0.361124	-1.81518	1.12881	0.161231
NF1	P21359	P21359	NF1_HUMAN	Neurofibromin	-0.113872	-0.690315	0.30753	0.649626
MAOA	P21397	P21397	AOFA_HUMAN	Amine oxidase [flavin-containing] A	0.570135	1.78825	1.10445	0.168196
ACO1	P21399	P21399	ACOHC_HUMAN	Cytoplasmic aconitate hydratase	0.268105	2.04324	1.34405	0.107229
TAF1	P21675	Q8IZX4;P21675	TAF1_HUMAN	Transcription initiation factor TFIID subunit 1	-0.531009	-5.62494	6.32398	0
EPHA1	P21709	P21709	EPHA1_HUMAN	Ephrin type-A receptor 1	0.495994	2.60639	1.94139	0.0335328
MDK	P21741	P21741	MK_HUMAN	Midkine	-0.665554	-2.12984	1.4299	0.0910998
MSR1	P21757	P21757	MSRE_HUMAN	Macrophage scavenger receptor types I and II	0.10591	0.421658	0.170868	0.794643
VDAC1	P21796	P21796	VDAC1_HUMAN	Voltage-dependent anion-selective channel protein 1	-0.0146466	-0.0846574	0.0302084	0.960507
BGN	P21810	P21810	PGS1_HUMAN	Biglycan	-0.741797	-2.01288	1.31448	0.113717
ERBB3	P21860	P21860	ERBB3_HUMAN	Receptor tyrosine-protein kinase erbB-3	-0.118663	-0.519354	0.217984	0.742697
SDHB	P21912	P21912	SDHB_HUMAN	Succinate dehydrogenase [ubiquinone] iron-sulfur subunit, mitochondrial	0.0574608	0.394194	0.158146	0.809683
CD9	P21926	P21926	CD9_HUMAN	CD9 antigen	0.583473	2.8971	2.28413	0.0167532
BCKDHB	P21953	P21953	ODBB_HUMAN	2-oxoisovalerate dehydrogenase subunit beta, mitochondrial	-0.209919	-1.345	0.736303	0.31892
COMT	P21964	P21964	COMT_HUMAN	Catechol O-methyltransferase	0.0373777	0.247338	0.0939539	0.880711
TGM2	P21980	P21980	TGM2_HUMAN	Protein-glutamine gamma-glutamyltransferase 2	-0.29141	-0.928473	0.44762	0.520849
MMUT	P22033	P22033	MUTA_HUMAN	Methylmalonyl-CoA mutase, mitochondrial	0.212866	1.78711	1.10343	0.168558
OSBP	P22059	P22059	OSBP1_HUMAN	Oxysterol-binding protein 1	0.20455	2.23354	1.53565	0.0740562
PCMT1	P22061	P22061	PIMT_HUMAN	Protein-L-isoaspartate(D-aspartate) O-methyltransferase	-0.258456	-2.95603	2.35627	0.014453
LPO	P22079	P22079	PERL_HUMAN	Lactoperoxidase	0.15189	1.37201	0.756948	0.3075
FBL	P22087	P22087	FBRL_HUMAN	rRNA 2'-O-methyltransferase fibrillarin	-0.259769	-1.89072	1.19834	0.140555
GART	P22102	P22102	PUR2_HUMAN	Trifunctional purine biosynthetic protein adenosine-3	-0.034812	-0.270706	0.10374	0.870687
TNXB	P22105	P22105	TENX_HUMAN	Tenascin-X	-0.0126542	-0.0500024	0.0176016	0.978208
CDH3	P22223	P22223	CADH3_HUMAN	Cadherin-3	-0.523094	-2.5036	1.82563	0.0420539
PAICS	P22234	P22234	PUR6_HUMAN	Bifunctional phosphoribosylaminoimidazole carboxylase/phosphoribosylaminoimidazole succinocarboxamide synthetase	-0.162225	-1.05535	0.529648	0.457489
SCP2	P22307	P22307	SCP2_HUMAN	Sterol carrier protein 2	0.245905	2.46439	1.78224	0.0458664
UBA1	P22314	P22314	UBA1_HUMAN	Ubiquitin-like modifier-activating enzyme 1	-0.0680905	-0.37749	0.15052	0.818764
GPX3	P22352	P22352	GPX3_HUMAN	Glutathione peroxidase 3	0.171892	0.610873	0.264787	0.694435
NME2	P22392	O60361;P22392	NDKB_HUMAN	Nucleoside diphosphate kinase B	0.0934019	0.470579	0.194097	0.767984
SPRR2D	P22532	P22532;P35325	SPR2D_HUMAN	Small proline-rich protein 2D	0.050252	0.15416	0.0565133	0.926826
FDXR	P22570	P22570	ADRO_HUMAN	NADPH:adrenodoxin oxidoreductase, mitochondrial	0.110901	0.706966	0.31674	0.640695
HNRNPA2B1	P22626	P22626	ROA2_HUMAN	Heterogeneous nuclear ribonucleoproteins A2/B1	-0.466727	-3.8176	3.5034	0.00127365
RFX1	P22670	P22670;P48378;P48380	RFX1_HUMAN	MHC class II regulatory factor RFX1	-0.456319	-7.73741	9.94681	0
CBL	P22681	P22681	CBL_HUMAN	E3 ubiquitin-protein ligase CBL	0.01767	0.271907	0.104248	0.870395
PRKACB	P22694	P22694	KAPCB_HUMAN	cAMP-dependent protein kinase catalytic subunit beta	-0.403189	-1.81076	1.1248	0.162146
UQCRC2	P22695	P22695	QCR2_HUMAN	Cytochrome b-c1 complex subunit 2, mitochondrial	0.427924	2.4511	1.76763	0.0472524
TGM1	P22735	P22735	TGM1_HUMAN	Protein-glutamine gamma-glutamyltransferase K	-0.264192	-0.941176	0.4556	0.514803
CPN2	P22792	P22792	CPN2_HUMAN	Carboxypeptidase N subunit 2	-0.222924	-0.84969	0.399281	0.56114
FECH	P22830	P22830	HEMH_HUMAN	Ferrochelatase, mitochondrial	-0.0814094	-0.485979	0.20156	0.761361
MRC1	P22897	P22897	MRC1_HUMAN	Macrophage mannose receptor 1	0.124892	0.530946	0.223769	0.736053
XPA	P23025	P23025	XPA_HUMAN	DNA repair protein complementing XP-A cells	-0.100681	-0.600234	0.259213	0.700071
IGHV1-2	P23083	P23083;A0A0C4DH31	HV102_HUMAN	Immunoglobulin heavy variable 1-2	0.885961	2.98633	2.39372	0.0133227
FBLN1	P23142	Cont_A0A3Q1MJB2;P23142	FBLN1_HUMAN	Fibulin-1	-0.561299	-2.07593	1.3762	0.100973
TCEA1	P23193	Q15560;P23193	TCEA1_HUMAN	Transcription elongation factor A protein 1	-0.555876	-4.6227	4.70535	9.09091e-05
PTGS1	P23219	P23219	PGH1_HUMAN	Prostaglandin G/H synthase 1	-0.00288096	-0.0107787	0.00373594	0.995695
ITGA6	P23229	P23229	ITA6_HUMAN	Integrin alpha-6	0.0968483	0.568705	0.2429	0.715583
SFPQ	P23246	P23246	SFPQ_HUMAN	Splicing factor, proline- and glutamine-rich	-0.514543	-4.87799	5.10686	1.7316e-05
TUBG1	P23258	P23258;Q9NRH3	TBG1_HUMAN	Tubulin gamma-1 chain	-0.0538952	-0.643644	0.28218	0.676843
PPIB	P23284	P23284	PPIB_HUMAN	Peptidyl-prolyl cis-trans isomerase B	0.497329	3.02054	2.43625	0.012219
S100A1	P23297	P23297	S10A1_HUMAN	Protein S100-A1	0.636141	1.29912	0.701772	0.338992
ME2	P23368	P23368	MAOM_HUMAN	NAD-dependent malic enzyme, mitochondrial	0.0285346	0.209704	0.0785289	0.897717
GLDC	P23378	P23378	GCSP_HUMAN	Glycine dehydrogenase (decarboxylating), mitochondrial	-1.3796	-3.98567	3.74519	0.000779623
WARS1	P23381	P23381	SYWC_HUMAN	Tryptophan--tRNA ligase, cytoplasmic	0.553445	3.7081	3.34878	0.00173258
RPS3	P23396	P23396	RS3_HUMAN	Small ribosomal subunit protein uS3	-0.0690988	-0.931871	0.44975	0.519055
GCSH	P23434	P23434	GCSH_HUMAN	Glycine cleavage system H protein, mitochondrial	-0.607604	-4.13886	3.97004	0.00046022
RPS6KB1	P23443	P23443	KS6B1_HUMAN	Ribosomal protein S6 kinase beta-1	0.0307975	0.25552	0.0973623	0.87633
JAK1	P23458	P23458	JAK1_HUMAN	Tyrosine-protein kinase JAK1	0.397978	3.86296	3.56813	0.00113929
PTPRG	P23470	P23470	PTPRG_HUMAN	Receptor-type tyrosine-protein phosphatase gamma	-0.382077	-1.69782	1.02431	0.193954
SP100	P23497	P23497;Q9H930	SP100_HUMAN	Nuclear autoantigen Sp-100	0.254579	1.16773	0.606621	0.400228
AHCY	P23526	P23526	SAHH_HUMAN	Adenosylhomocysteinase	-0.284661	-2.09842	1.3985	0.0968623
CFL1	P23528	Q9Y281;P23528	COF1_HUMAN	Cofilin-1	0.000316325	0.00259148	0.000895299	0.999911
EIF4B	P23588	P23588	IF4B_HUMAN	Eukaryotic translation initiation factor 4B	-0.346906	-3.97456	3.72906	0.000802646
F8A3	P23610	P23610	HAP40_HUMAN	40-kDa huntingtin-associated protein	0.0153446	0.108594	0.0391131	0.949008
ATP2B4	P23634	P23634;P20020	AT2B4_HUMAN	Plasma membrane calcium-transporting ATPase 4	-0.318108	-3.04425	2.46591	0.0115161
DGKA	P23743	P23743	DGKA_HUMAN	Diacylglycerol kinase alpha	-0.0361216	-0.219024	0.0823102	0.893871
CPT2	P23786	P23786	CPT2_HUMAN	Carnitine O-palmitoyltransferase 2, mitochondrial	0.188565	1.18323	0.617557	0.392643
DTYMK	P23919	P23919	KTHY_HUMAN	Thymidylate kinase	-0.231221	-1.67992	1.00875	0.199736
RRM1	P23921	P23921	RIR1_HUMAN	Ribonucleoside-diphosphate reductase large subunit	-0.359368	-2.3772	1.68731	0.05521
LAMA2	P24043	P24043	LAMA2_HUMAN	Laminin subunit alpha-2	-0.334707	-1.16187	0.602509	0.403296
PRTN3	P24158	P24158	PRTN3_HUMAN	Myeloblastin	-0.0211565	-0.0829735	0.0295881	0.961142
GPT	P24298	P24298	ALAT1_HUMAN	Alanine aminotransferase 1	0.146417	0.525057	0.220825	0.739595
CHM	P24386	P24386	RAE1_HUMAN	Rab proteins geranylgeranyltransferase component A 1	0.0920016	0.912632	0.437741	0.530064
NR2F2	P24468	P10589;P24468	COT2_HUMAN	COUP transcription factor 2	-0.261114	-1.48879	0.848903	0.263725
EEF1B2	P24534	P24534	EF1B_HUMAN	Elongation factor 1-beta	0.0623297	0.456655	0.187411	0.775721
ATP5PB	P24539	P24539	AT5F1_HUMAN	ATP synthase F(0) complex subunit B1, mitochondrial	0.0462708	0.362698	0.143837	0.825502
ACP1	P24666	P24666	PPAC_HUMAN	Low molecular weight phosphotyrosine protein phosphatase	-0.375841	-2.83213	2.20561	0.0195958
PRKCH	P24723	P24723	KPCL_HUMAN	Protein kinase C eta type	-0.147422	-0.828601	0.386678	0.573194
ACAT1	P24752	P24752	THIL_HUMAN	Acetyl-CoA acetyltransferase, mitochondrial	0.334792	1.6998	1.02604	0.193461
TNC	P24821	P24821	TENA_HUMAN	Tenascin	-0.116034	-0.453769	0.186033	0.777388
MYL9	P24844	P24844	MYL9_HUMAN	Myosin regulatory light polypeptide 9	0.0205857	0.178334	0.0659854	0.914561
CCNE1	P24864	P24864	CCNE1_HUMAN	G1/S-specific cyclin-E1	-0.325107	-2.46671	1.7848	0.0456517
POLR2A	P24928	P24928	RPB1_HUMAN	DNA-directed RNA polymerase II subunit RPB1	-0.364216	-5.99759	6.94934	0
CDK2	P24941	P24941;Q00526	CDK2_HUMAN	Cyclin-dependent kinase 2	-0.660022	-4.40141	4.36457	0.000244898
APC	P25054	P25054	APC_HUMAN	Adenomatous polyposis coli protein	-0.108309	-1.26807	0.678786	0.352435
GRK2	P25098	P25098	ARBK1_HUMAN	Beta-adrenergic receptor kinase 1	0.0748601	1.02594	0.510173	0.471106
MCM3	P25205	P25205	MCM3_HUMAN	DNA replication licensing factor MCM3	-0.772317	-3.66262	3.28526	0.00204404
NFYB	P25208	P25208	NFYB_HUMAN	Nuclear transcription factor Y subunit beta	-0.425723	-3.93561	3.67264	0.00092043
AZGP1	P25311	P25311	ZA2G_HUMAN	Zinc-alpha-2-glycoprotein	-0.246499	-1.29402	0.697979	0.34085
MPST	P25325	P25325	THTM_HUMAN	3-mercaptopyruvate sulfurtransferase	0.128846	1.11889	0.572667	0.425193
RPS12	P25398	P25398	RS12_HUMAN	Small ribosomal subunit protein eS12	-0.282619	-1.78427	1.10087	0.169315
BRD2	P25440	P25440	BRD2_HUMAN	Bromodomain-containing protein 2	-0.282388	-2.43529	1.75033	0.0488275
YY1	P25490	P25490	TYY1_HUMAN	Transcriptional repressor protein YY1	-0.436851	-4.10057	3.91346	0.000543269
DNAJB1	P25685	Q9UDY4;P25685	DNJB1_HUMAN	DnaJ homolog subfamily B member 1	-0.258016	-2.57765	1.90874	0.0358038
DNAJB2	P25686	Q8NHS0;P25686;O75190	DNJB2_HUMAN	DnaJ homolog subfamily B member 2	-0.0428538	-0.394572	0.15832	0.809759
ATP5F1A	P25705	P25705	ATPA_HUMAN	ATP synthase subunit alpha, mitochondrial	-0.0348257	-0.26235	0.100223	0.873105
CTSS	P25774	P25774	CATS_HUMAN	Cathepsin S	1.23409	4.08544	3.89117	0.000553191
PSMA1	P25786	P25786	PSA1_HUMAN	Proteasome subunit alpha type-1	0.0933948	1.42549	0.798521	0.28765
PSMA2	P25787	P25787	PSA2_HUMAN	Proteasome subunit alpha type-2	0.100036	1.35841	0.74653	0.313144
PSMA3	P25788	P25788	PSA3_HUMAN	Proteasome subunit alpha type-3	-1.48463e-05	-0.000198074	6.8365e-05	1
PSMA4	P25789	P25789	PSA4_HUMAN	Proteasome subunit alpha type-4	0.0707144	0.983309	0.482439	0.492589
NFKBIA	P25963	P25963	IKBA_HUMAN	NF-kappa-B inhibitor alpha	0.465331	3.44224	2.9835	0.00410706
ITGA3	P26006	P26006	ITA3_HUMAN	Integrin alpha-3	0.15979	1.04332	0.521649	0.463031
ITGB8	P26012	P26012	ITB8_HUMAN	Integrin beta-8	0.445956	2.18791	1.48873	0.0814218
MSN	P26038	P15311;P35241;P26038	MOES_HUMAN	Moesin	0.286241	2.13893	1.43905	0.0897165
PTPN3	P26045	P26045	PTN3_HUMAN	Tyrosine-protein phosphatase non-receptor type 3	0.596063	4.19204	4.04904	0.000368222
DDX6	P26196	P26196	DDX6_HUMAN	Probable ATP-dependent RNA helicase DDX6	-0.161195	-1.57198	0.917055	0.234013
CTNNA2	P26232	P26232	CTNA2_HUMAN	Catenin alpha-2	-0.0177462	-0.185217	0.0687133	0.911046
DNMT1	P26358	P26358	DNMT1_HUMAN	DNA (cytosine-5)-methyltransferase 1	-0.695693	-3.95678	3.70326	0.000841649
U2AF2	P26368	P26368	U2AF2_HUMAN	Splicing factor U2AF 65 kDa subunit	-0.643877	-4.52502	4.55405	0.000147436
RPL13	P26373	P26373	RL13_HUMAN	Large ribosomal subunit protein eL13	-0.00964611	-0.107374	0.0386554	0.949838
CHML	P26374	P26374	RAE2_HUMAN	Rab proteins geranylgeranyltransferase component A 2	0.0045906	0.0241679	0.0084212	0.990337
IVD	P26440	P26440	IVD_HUMAN	Isovaleryl-CoA dehydrogenase, mitochondrial	0.296757	1.63338	0.968764	0.214549
S100A4	P26447	P26447	S10A4_HUMAN	Protein S100-A4	-0.185439	-0.48575	0.201448	0.761281
MGAT1	P26572	P26572	MGAT1_HUMAN	Alpha-1,3-mannosyl-glycoprotein 2-beta-N-acetylglucosaminyltransferase	0.549043	3.47117	3.02253	0.00375349
HMGB2	P26583	P26583	HMGB2_HUMAN	High mobility group protein B2	-0.817593	-4.14268	3.9757	0.00045098
PTBP1	P26599	P26599	PTBP1_HUMAN	Polypyrimidine tract-binding protein 1	-0.186963	-1.81686	1.13034	0.160974
TARS1	P26639	P26639;A2RTX5	SYTC_HUMAN	Threonine--tRNA ligase 1, cytoplasmic	0.218467	1.42275	0.79637	0.288669
VARS1	P26640	P26640	SYVC_HUMAN	Valine--tRNA ligase	0.137855	0.982658	0.482019	0.492922
EEF1G	P26641	P26641	EF1G_HUMAN	Elongation factor 1-gamma	-0.0589389	-0.435191	0.177221	0.786583
FKBP2	P26885	P26885	FKBP2_HUMAN	Peptidyl-prolyl cis-trans isomerase FKBP2	0.344263	2.04406	1.34485	0.107182
STOM	P27105	P27105	STOM_HUMAN	Stomatin	0.066329	0.238586	0.09033	0.884716
AK4	P27144	P27144;A0A8I5KW96	KAD4_HUMAN	Adenylate kinase 4, mitochondrial	0.341079	1.66538	0.996182	0.2046
PON1	P27169	P27169	PON1_HUMAN	Serum paraoxonase/arylesterase 1	-0.197989	-0.951531	0.462143	0.509169
MAOB	P27338	P27338	AOFB_HUMAN	Amine oxidase [flavin-containing] B	0.777981	1.92849	1.23376	0.131436
YWHAQ	P27348	P27348	1433T_HUMAN	14-3-3 protein theta	-0.544371	-3.70316	3.34185	0.00174484
MAPK3	P27361	P27361	MK03_HUMAN	Mitogen-activated protein kinase 3	0.0709351	0.74429	0.337702	0.619324
MARK3	P27448	P27448	MARK3_HUMAN	MAP/microtubule affinity-regulating kinase 3	-0.085545	-0.860387	0.405728	0.555365
ARNT	P27540	P27540	ARNT_HUMAN	Aryl hydrocarbon receptor nuclear translocator	-0.162891	-1.7928	1.10856	0.166714
RPL10	P27635	P27635	RL10_HUMAN	Large ribosomal subunit protein uL16	0.0111393	0.130361	0.0473516	0.937
RPA1	P27694	P27694	RFA1_HUMAN	Replication protein A 70 kDa DNA-binding subunit	-0.359204	-3.19033	2.65161	0.00791713
APEX1	P27695	P27695	APEX1_HUMAN	DNA-(apurinic or apyrimidinic site) endonuclease	-0.884389	-3.81844	3.5046	0.00127217
CD82	P27701	P27701	CD82_HUMAN	CD82 antigen	0.981082	4.28375	4.1864	0.000289544
DCK	P27707	P27707	DCK_HUMAN	Deoxycytidine kinase	-0.118319	-0.698563	0.312082	0.644783
CAD	P27708	P27708	PYR1_HUMAN	CAD protein	-0.373068	-3.14766	2.59684	0.00888709
CALR	P27797	P27797	CALR_HUMAN	Calreticulin	0.133339	0.824512	0.38425	0.575405
MAP4	P27816	P27816	MAP4_HUMAN	Microtubule-associated protein 4	-0.10107	-0.791097	0.364614	0.59241
CANX	P27824	P27824	CALX_HUMAN	Calnexin	0.453335	2.91426	2.30505	0.0159977
PIK3R1	P27986	P27986	P85A_HUMAN	Phosphatidylinositol 3-kinase regulatory subunit alpha	0.233527	2.60727	1.94239	0.0334857
ITPKB	P27987	P27987	IP3KB_HUMAN	Inositol-trisphosphate 3-kinase B	-0.0110588	-0.0852144	0.0304138	0.960635
PSMB8	P28062	P28062	PSB8_HUMAN	Proteasome subunit beta type-8	0.999592	5.91328	6.80702	0
PSMB9	P28065	P28065	PSB9_HUMAN	Proteasome subunit beta type-9	1.51794	6.85402	8.41514	0
PSMA5	P28066	P28066	PSA5_HUMAN	Proteasome subunit alpha type-5	0.0258481	0.294176	0.113732	0.858556
PSMB4	P28070	P28070	PSB4_HUMAN	Proteasome subunit beta type-4	-0.0710305	-0.867603	0.410098	0.55183
PSMB6	P28072	P28072	PSB6_HUMAN	Proteasome subunit beta type-6	-0.498794	-4.59695	4.66533	9.55631e-05
PSMB5	P28074	P28074	PSB5_HUMAN	Proteasome subunit beta type-5	-0.957539	-6.06056	7.05593	0
GSTM2	P28161	Q03013;P09488;P28161	GSTM2_HUMAN	Glutathione S-transferase Mu 2	-0.616121	-2.57118	1.90142	0.0363214
ABCD3	P28288	P28288	ABCD3_HUMAN	ATP-binding cassette sub-family D member 3	0.317296	2.47813	1.7974	0.0445186
TMOD1	P28289	P28289	TMOD1_HUMAN	Tropomodulin-1	-0.227503	-1.08047	0.546498	0.444209
ITPRID2	P28290	P28290	ITPI2_HUMAN	Protein ITPRID2	0.142957	1.49416	0.853232	0.261627
NDUFS1	P28331	P28331	NDUS1_HUMAN	NADH-ubiquinone oxidoreductase 75 kDa subunit, mitochondrial	0.232037	2.03007	1.33119	0.10985
POLD1	P28340	P28340	DPOD1_HUMAN	DNA polymerase delta catalytic subunit	-0.405971	-3.61296	3.21637	0.0024114
TEAD1	P28347	Q15562;Q15561;Q99594;P28347	TEAD1_HUMAN	Transcriptional enhancer factor TEF-1	-0.347475	-3.9924	3.75499	0.000765101
SMARCA1	P28370	P28370	SMCA1_HUMAN	Probable global transcription activator SNF2L1	-0.446937	-3.4498	2.99369	0.00401958
MAPK1	P28482	P28482	MK01_HUMAN	Mitogen-activated protein kinase 1	0.408832	3.94727	3.68949	0.00087689
GCA	P28676	P28676	GRAN_HUMAN	Grancalcin	-0.0957723	-0.85076	0.399924	0.560811
RXRB	P28702	P28702;P48443;P19793	RXRB_HUMAN	Retinoic acid receptor RXR-beta	-0.275937	-3.43801	2.97781	0.00412581
ERCC5	P28715	P28715	ERCC5_HUMAN	DNA excision repair protein ERCC-5	-0.106549	-0.818675	0.380795	0.578862
GRN	P28799	P28799	GRN_HUMAN	Progranulin	0.437079	2.52289	1.84713	0.0403782
LAP3	P28838	P28838	AMPL_HUMAN	Cytosol aminopeptidase	0.42265	2.48798	1.80829	0.0435419
S100A2	P29034	P29034	S10A2_HUMAN	Protein S100-A2	0.267488	0.704917	0.315602	0.641731
GTF2E1	P29083	P29083	T2EA_HUMAN	General transcription factor IIE subunit 1	-0.251754	-2.03987	1.34075	0.107823
GTF2E2	P29084	P29084	T2EB_HUMAN	Transcription initiation factor IIE subunit beta	-0.224515	-2.39986	1.71178	0.0524448
TPP2	P29144	P29144	TPP2_HUMAN	Tripeptidyl-peptidase 2	-0.0728997	-0.666853	0.294701	0.66223
IMPA1	P29218	P29218	IMPA1_HUMAN	Inositol monophosphatase 1	-0.254824	-2.20616	1.50742	0.0784295
EPHB2	P29323	P29323;Q15375	EPHB2_HUMAN	Ephrin type-B receptor 2	-0.0288796	-0.105836	0.038079	0.95053
PTPN6	P29350	P29350	PTN6_HUMAN	Tyrosine-protein phosphatase non-receptor type 6	0.133295	1.07241	0.541069	0.448242
SHC1	P29353	P29353	SHC1_HUMAN	SHC-transforming protein 1	0.300529	3.95773	3.70464	0.000844396
MPG	P29372	P29372	3MG_HUMAN	DNA-3-methyladenine glycosylase	-0.346836	-3.08565	2.51801	0.0103844
CRABP2	P29373	P29373	RABP2_HUMAN	Cellular retinoic acid-binding protein 2	-0.629381	-2.17788	1.4785	0.0831431
KDM5A	P29375	P29375	KDM5A_HUMAN	Lysine-specific demethylase 5A	-0.385427	-2.89063	2.27627	0.0170046
TKT	P29401	P29401	TKT_HUMAN	Transketolase	-0.289475	-1.88962	1.19732	0.140792
CASP1	P29466	P29466	CASP1_HUMAN	Caspase-1	0.926852	4.63804	4.72924	8.52575e-05
NOS3	P29474	P29474	NOS3_HUMAN	Nitric oxide synthase 3	0.0588544	0.354405	0.140119	0.829356
SERPINB3	P29508	P29508	SPB3_HUMAN	Serpin B3	0.121492	0.453236	0.185779	0.777309
RBMS1	P29558	P29558	RBMS1_HUMAN	RNA-binding motif, single-stranded-interacting protein 1	-0.212262	-2.47775	1.79698	0.0445385
PML	P29590	P29590	PML_HUMAN	Protein PML	0.213072	1.60098	0.94133	0.224385
TYK2	P29597	P29597	TYK2_HUMAN	Non-receptor tyrosine-protein kinase TYK2	0.046716	0.403134	0.162262	0.804376
SERPINA4	P29622	P29622	KAIN_HUMAN	Kallistatin	-0.188649	-0.875694	0.415017	0.548235
EEF1D	P29692	P29692	EF1D_HUMAN	Elongation factor 1-delta	0.369408	3.39837	2.92468	0.0045566
OAS2	P29728	P29728	OAS2_HUMAN	2'-5'-oligoadenylate synthase 2	1.02706	3.554	3.13525	0.00297835
MARCKS	P29966	P29966	MARCS_HUMAN	Myristoylated alanine-rich C-kinase substrate	-0.441455	-2.19108	1.49196	0.0809902
GNA11	P29992	P29992	GNA11_HUMAN	Guanine nucleotide-binding protein subunit alpha-11	0.261465	3.19241	2.65428	0.0078756
ALDH4A1	P30038	P30038	AL4A1_HUMAN	Delta-1-pyrroline-5-carboxylate dehydrogenase, mitochondrial	-0.386855	-1.79852	1.11372	0.165272
PBLD	P30039	P30039	PBLD_HUMAN	Phenazine biosynthesis-like domain-containing protein	-0.0612993	-0.263228	0.100591	0.872921
ERP29	P30040	P30040	ERP29_HUMAN	Endoplasmic reticulum resident protein 29	-0.0774063	-0.459065	0.188564	0.775047
PRDX6	P30041	P30041	PRDX6_HUMAN	Peroxiredoxin-6	-0.376264	-2.99245	2.40131	0.0131271
BLVRB	P30043	P30043	BLVRB_HUMAN	Flavin reductase (NADPH)	0.559406	3.21897	2.68861	0.00730239
PRDX5	P30044	P30044	PRDX5_HUMAN	Peroxiredoxin-5, mitochondrial	0.108141	0.782659	0.359711	0.596717
DDT	P30046	A6NHG4;P30046	DOPD_HUMAN	D-dopachrome decarboxylase	0.483754	2.30108	1.60621	0.0646653
PRDX3	P30048	P30048	PRDX3_HUMAN	Thioredoxin-dependent peroxide reductase, mitochondrial	-0.151339	-1.13567	0.584252	0.416059
ATP5F1D	P30049	P30049	ATPD_HUMAN	ATP synthase subunit delta, mitochondrial	0.0297148	0.168221	0.0620025	0.919671
RPL12	P30050	P30050	RL12_HUMAN	Large ribosomal subunit protein uL11	-0.0690108	-0.763184	0.348482	0.608422
ECHS1	P30084	P30084	ECHM_HUMAN	Enoyl-CoA hydratase, mitochondrial	0.0859471	0.562984	0.239973	0.719077
CMPK1	P30085	P30085	KCY_HUMAN	UMP-CMP kinase	0.566988	3.78134	3.45194	0.0014297
PEBP1	P30086	P30086	PEBP1_HUMAN	Phosphatidylethanolamine-binding protein 1	-0.369341	-2.74405	2.10092	0.0242515
PDIA3	P30101	P30101	PDIA3_HUMAN	Protein disulfide-isomerase A3	0.61149	3.83562	3.52908	0.00123614
PPP2R1A	P30153	P30153	2AAA_HUMAN	Serine/threonine-protein phosphatase 2A 65 kDa regulatory subunit A alpha isoform	-0.159366	-1.80283	1.11762	0.164003
PPP2R1B	P30154	P30154	2AAB_HUMAN	Serine/threonine-protein phosphatase 2A 65 kDa regulatory subunit A beta isoform	0.01001	0.0954149	0.0341903	0.956318
CDC27	P30260	P30260	CDC27_HUMAN	Cell division cycle protein 27 homolog	-0.14433	-1.31406	0.712943	0.331806
PPIF	P30405	P30405	PPIF_HUMAN	Peptidyl-prolyl cis-trans isomerase F, mitochondrial	0.45589	1.40442	0.782033	0.294836
NKTR	P30414	P30414	NKTR_HUMAN	NK-tumor recognition protein	-0.426746	-3.92047	3.65077	0.000965812
NMT1	P30419	P30419	NMT1_HUMAN	Glycylpeptide N-tetradecanoyltransferase 1	0.0848141	0.818079	0.380442	0.579212
HMOX2	P30519	P30519	HMOX2_HUMAN	Heme oxygenase 2	0.0863912	0.754706	0.343631	0.613324
ADSS2	P30520	P30520	PURA2_HUMAN	Adenylosuccinate synthetase isozyme 2	0.0345125	0.339424	0.133454	0.835853
LRPAP1	P30533	P30533	AMRP_HUMAN	Alpha-2-macroglobulin receptor-associated protein	-0.186564	-1.06269	0.534548	0.45369
TSPO	P30536	P30536	TSPO_HUMAN	Translocator protein	0.614568	2.66343	2.00687	0.0291769
ADSL	P30566	P30566	PUR8_HUMAN	Adenylosuccinate lyase	-0.00416268	-0.027105	0.00945558	0.988557
CLIP1	P30622	P30622	CLIP1_HUMAN	CAP-Gly domain-containing linker protein 1	-0.0248296	-0.352352	0.139202	0.830462
SRI	P30626	P30626	SORCN_HUMAN	Sorcin	0.0670029	0.471581	0.19458	0.767707
GSTT1	P30711	P30711	GSTT1_HUMAN	Glutathione S-transferase theta-1	0.201755	0.64048	0.280486	0.678856
SERPINB1	P30740	P30740	ILEU_HUMAN	Leukocyte elastase inhibitor	0.71366	4.07202	3.87143	0.000578763
ALDH1B1	P30837	P30837	AL1B1_HUMAN	Aldehyde dehydrogenase X, mitochondrial	-0.0479253	-0.264655	0.101191	0.872418
POLR2B	P30876	P30876	RPB2_HUMAN	DNA-directed RNA polymerase II subunit RPB2	-0.319032	-4.98344	5.27511	9.68523e-06
LCN1	P31025	P31025	LCN1_HUMAN	Lipocalin-1	0.18121	0.607362	0.262944	0.695984
SDHA	P31040	P31040	SDHA_HUMAN	Succinate dehydrogenase [ubiquinone] flavoprotein subunit, mitochondrial	-0.0342706	-0.27021	0.103531	0.870657
CORO1A	P31146	P31146	COR1A_HUMAN	Coronin-1A	1.03445	4.29849	4.2086	0.000270636
GDI1	P31150	P31150	GDIA_HUMAN	Rab GDP dissociation inhibitor alpha	-0.02002	-0.147948	0.0541061	0.929087
S100A7	P31151	P31151	S10A7_HUMAN	Protein S100-A7	0.23872	1.00924	0.499242	0.480282
MAT2A	P31153	P31153	METK2_HUMAN	S-adenosylmethionine synthase isoform type-2	-0.115428	-1.23679	0.655945	0.36671
PRKAR1B	P31321	P31321	KAP1_HUMAN	cAMP-dependent protein kinase type I-beta regulatory subunit	-0.394355	-2.21213	1.51356	0.0775768
PRKAR2B	P31323	P31323	KAP3_HUMAN	cAMP-dependent protein kinase type II-beta regulatory subunit	-0.780157	-3.54391	3.12144	0.00305498
RRM2	P31350	P31350	RIR2_HUMAN	Ribonucleoside-diphosphate reductase subunit M2	-0.195377	-0.727304	0.328108	0.629585
SDC4	P31431	P31431	SDC4_HUMAN	Syndecan-4	0.609945	4.49642	4.51001	0.000156495
TIA1	P31483	P31483	TIA1_HUMAN	Cytotoxic granule associated RNA binding protein TIA1	-0.515787	-5.3351	5.84515	0
FMO3	P31513	P31513	FMO3_HUMAN	Flavin-containing monooxygenase 3	-0.148538	-0.496645	0.206771	0.754753
DNAJA1	P31689	P31689	DNJA1_HUMAN	DnaJ homolog subfamily A member 1	-0.119456	-1.05641	0.530353	0.456931
AKT1	P31749	P31749	AKT1_HUMAN	RAC-alpha serine/threonine-protein kinase	-0.019697	-0.159526	0.0586016	0.924177
AKT2	P31751	P31751	AKT2_HUMAN	RAC-beta serine/threonine-protein kinase	-0.102176	-0.668	0.295324	0.66142
UQCRC1	P31930	P31930	QCR1_HUMAN	Cytochrome b-c1 complex subunit 1, mitochondrial	0.390235	2.64891	1.99012	0.0302412
HIBADH	P31937	P31937	3HIDH_HUMAN	3-hydroxyisobutyrate dehydrogenase, mitochondrial	0.0642846	0.267628	0.102442	0.871312
ATIC	P31939	P31939	PUR9_HUMAN	Bifunctional purine biosynthesis protein ATIC	-0.0263911	-0.216157	0.0811443	0.895108
HNRNPH3	P31942	P31942	HNRH3_HUMAN	Heterogeneous nuclear ribonucleoprotein H3	-0.806626	-6.97367	8.62198	0
HNRNPH1	P31943	P31943	HNRH1_HUMAN	Heterogeneous nuclear ribonucleoprotein H	-0.716144	-5.19969	5.62412	1.15274e-05
CASP14	P31944	P31944	CASPE_HUMAN	Caspase-14	0.183199	0.799079	0.369272	0.588222
YWHAB	P31946	P31946	1433B_HUMAN	14-3-3 protein beta/alpha	-0.203869	-1.42952	0.801686	0.286315
SFN	P31947	P31947	1433S_HUMAN	14-3-3 protein sigma	0.422971	3.44934	2.99307	0.00401954
STIP1	P31948	P31948	STIP1_HUMAN	Stress-induced-phosphoprotein 1	0.0344703	0.258966	0.0988035	0.874993
S100A11	P31949	P31949	S10AB_HUMAN	Protein S100-A11	0.715317	3.03065	2.44889	0.0118997
L1CAM	P32004	P32004	L1CAM_HUMAN	Neural cell adhesion molecule L1	-0.0510741	-0.149794	0.0548202	0.928157
INPP5B	P32019	P32019	I5P2_HUMAN	Type II inositol 1,4,5-trisphosphate 5-phosphatase	-0.114822	-1.20372	0.632131	0.38301
PRDX2	P32119	P32119	PRDX2_HUMAN	Peroxiredoxin-2	-0.453468	-2.73394	2.08903	0.024789
ARRB2	P32121	P32121	ARRB2_HUMAN	Beta-arrestin-2	0.0286092	0.179708	0.0665288	0.913966
GK	P32189	P32189;Q14409	GLPK_HUMAN	Glycerol kinase	0.088814	0.503679	0.210228	0.751769
DCTD	P32321	P32321	DCTD_HUMAN	Deoxycytidylate deaminase	-0.293644	-1.96608	1.26945	0.123517
PYCR1	P32322	P32322	P5CR1_HUMAN	Pyrroline-5-carboxylate reductase 1, mitochondrial	-0.209104	-0.681606	0.302747	0.653751
SLC8A1	P32418	P32418	NAC1_HUMAN	Sodium/calcium exchanger 1	0.23492	1.04719	0.524217	0.461137
GBP1	P32455	P32455;Q9H0R5	GBP1_HUMAN	Guanylate-binding protein 1	0.691493	2.93123	2.32581	0.0153302
GBP2	P32456	P32456	GBP2_HUMAN	Guanylate-binding protein 2	1.05251	4.55113	4.59436	0.000124183
ELF1	P32519	P32519	ELF1_HUMAN	ETS-related transcription factor Elf-1	-0.0316216	-0.323301	0.126357	0.845008
GTF2H1	P32780	P32780	TF2H1_HUMAN	General transcription factor IIH subunit 1	-0.0610499	-0.609048	0.263828	0.695351
CTH	P32929	P32929	CGL_HUMAN	Cystathionine gamma-lyase	0.148398	0.672595	0.297825	0.65878
RPL9P9	P32969	P32969	RL9_HUMAN	Large ribosomal subunit protein uL6	-0.18427	-1.62804	0.964221	0.216072
ACSL1	P33121	P33121	ACSL1_HUMAN	Long-chain-fatty-acid--CoA ligase 1	0.534073	2.955	2.35501	0.0144799
KIF5B	P33176	O60282;P33176;Q12840	KINH_HUMAN	Kinesin-1 heavy chain	-0.103651	-1.03986	0.519355	0.464529
CSTF2	P33240	Q9H0L4;P33240	CSTF2_HUMAN	Cleavage stimulation factor subunit 2	-0.235823	-2.42235	1.7362	0.0499628
LSP1	P33241	P33241	LSP1_HUMAN	Lymphocyte-specific protein 1	0.90058	3.54742	3.12625	0.00302582
DUT	P33316	P33316	DUT_HUMAN	Deoxyuridine 5'-triphosphate nucleotidohydrolase, mitochondrial	-0.22648	-1.32247	0.719262	0.327854
ABCC1	P33527	P33527	MRP1_HUMAN	Multidrug resistance-associated protein 1	0.116027	1.05719	0.530875	0.456799
ABCD1	P33897	P33897	ABCD1_HUMAN	ATP-binding cassette sub-family D member 1	0.358768	1.83714	1.14885	0.15548
MCM4	P33991	P33991	MCM4_HUMAN	DNA replication licensing factor MCM4	-0.7593	-3.64241	3.25716	0.0022202
MCM5	P33992	P33992	MCM5_HUMAN	DNA replication licensing factor MCM5	-0.732409	-3.38033	2.90062	0.00482673
MCM7	P33993	P33993	MCM7_HUMAN	DNA replication licensing factor MCM7	-0.854516	-3.63146	3.24197	0.00228365
GALNS	P34059	P34059	GALNS_HUMAN	N-acetylgalactosamine-6-sulfatase	-0.130558	-1.01887	0.50553	0.474923
SHMT1	P34896	P34896	GLYC_HUMAN	Serine hydroxymethyltransferase, cytosolic	0.0387081	0.17203	0.063499	0.917358
SHMT2	P34897	P34897	GLYM_HUMAN	Serine hydroxymethyltransferase, mitochondrial	-0.812418	-3.72963	3.37899	0.0016
EPHX2	P34913	P34913	HYES_HUMAN	Bifunctional epoxide hydrolase 2	-0.121076	-0.572286	0.244737	0.713636
HSPA1L	P34931	P34931	HS71L_HUMAN	Heat shock 70 kDa protein 1-like	-0.620453	-1.61419	0.952473	0.220057
HSPA4	P34932	P34932	HSP74_HUMAN	Heat shock 70 kDa protein 4	0.0152341	0.118474	0.0428357	0.943176
MPI	P34949	P34949	MPI_HUMAN	Mannose-6-phosphate isomerase	0.187135	1.45914	0.825141	0.274621
GPC1	P35052	P35052	GPC1_HUMAN	Glypican-1	-0.41766	-3.13095	2.5755	0.00921309
PFN2	P35080	P35080	PROF2_HUMAN	Profilin-2	-0.719388	-6.33866	7.52927	0
CA8	P35219	P35219	CAH8_HUMAN	Carbonic anhydrase-related protein	0.277997	0.887029	0.421944	0.543827
CTNNA1	P35221	P35221;P26232	CTNA1_HUMAN	Catenin alpha-1	-0.0654897	-0.801132	0.370473	0.587869
CTNNB1	P35222	P35222	CTNB1_HUMAN	Catenin beta-1	-0.146889	-1.70645	1.03185	0.191322
BMI1	P35226	P35226	BMI1_HUMAN	Polycomb complex protein BMI-1	-0.704032	-5.41721	5.98003	0
PHB1	P35232	P35232	PHB1_HUMAN	Prohibitin 1	-0.158616	-0.997187	0.491404	0.485625
SERPINB6	P35237	P35237	SPB6_HUMAN	Serpin B6	-0.00485902	-0.0267741	0.00933891	0.988667
NF2	P35240	P35240	MERL_HUMAN	Merlin	-0.0252512	-0.340605	0.133977	0.835379
RDX	P35241	P35241	RADI_HUMAN	Radixin	-0.000303791	-0.00197625	0.000682585	0.999949
RPA3	P35244	P35244	RFA3_HUMAN	Replication protein A 14 kDa subunit	-0.242384	-2.04926	1.34995	0.106185
RFC4	P35249	P35249	RFC4_HUMAN	Replication factor C subunit 4	-0.54602	-4.57002	4.62357	0.000106312
RFC2	P35250	P35250	RFC2_HUMAN	Replication factor C subunit 2	-0.459585	-4.38468	4.33911	0.000241379
RFC1	P35251	P35251	RFC1_HUMAN	Replication factor C subunit 1	-0.500333	-4.60958	4.68495	8.99654e-05
RPL22	P35268	P35268	RL22_HUMAN	Large ribosomal subunit protein eL22	-0.0266944	-0.264037	0.100931	0.872513
GTF2F1	P35269	P35269	T2FA_HUMAN	General transcription factor IIF subunit 1	-0.35085	-3.5196	3.08826	0.00330068
SPR	P35270	P35270	SPRE_HUMAN	Sepiapterin reductase	0.642426	3.40163	2.92903	0.00450354
IDUA	P35475	P35475	IDUA_HUMAN	Alpha-L-iduronidase	-0.133907	-0.59259	0.255229	0.704628
FBN1	P35555	P35555	FBN1_HUMAN	Fibrillin-1	-0.847851	-2.14377	1.44392	0.0890338
IRS1	P35568	P35568	IRS1_HUMAN	Insulin receptor substrate 1	-0.63072	-2.91837	2.31007	0.0158428
AGL	P35573	P35573	GDE_HUMAN	Glycogen debranching enzyme	0.164226	1.39324	0.773339	0.29951
MYH9	P35579	P35579	MYH9_HUMAN	Myosin-9	0.170085	1.37223	0.757121	0.307532
MYH10	P35580	P35580;Q7Z406	MYH10_HUMAN	Myosin-10	-0.737468	-5.67593	6.40896	0
COPB2	P35606	P35606	COPB2_HUMAN	Coatomer subunit beta'	0.245338	2.84476	2.2208	0.0191048
ACTN2	P35609	P35609	ACTN2_HUMAN	Alpha-actinin-2	-0.0460384	-0.366818	0.145692	0.82371
SOAT1	P35610	P35610	SOAT1_HUMAN	Sterol O-acyltransferase 1	0.224187	1.18867	0.621418	0.390423
ADD1	P35611	P35611	ADDA_HUMAN	Alpha-adducin	-0.36761	-3.45639	3.00257	0.00393464
ADD2	P35612	P35612	ADDB_HUMAN	Beta-adducin	-0.185918	-0.744002	0.337539	0.619428
BSG	P35613	P35613	BASI_HUMAN	Basigin	-0.0840246	-0.634553	0.277321	0.681889
FUS	P35637	P35637	FUS_HUMAN	RNA-binding protein FUS	-1.02108	-6.15106	7.20952	0
NUP214	P35658	P35658	NU214_HUMAN	Nuclear pore complex protein Nup214	-0.172556	-3.26209	2.74468	0.00655467
DEK	P35659	P35659	DEK_HUMAN	Protein DEK	-0.611553	-4.992	5.28883	9.73236e-06
ATP7B	P35670	P35670	ATP7B_HUMAN	Copper-transporting ATPase 2	-0.263071	-1.57347	0.918294	0.233772
MYH11	P35749	P35749	MYH11_HUMAN	Myosin-11	-0.482748	-1.69278	1.01992	0.195699
GLRX	P35754	P35754	GLRX1_HUMAN	Glutaredoxin-1	0.0493688	0.250724	0.095362	0.879075
CHKA	P35790	P35790	CHKA_HUMAN	Choline kinase alpha	0.0617678	0.258171	0.0984708	0.875262
PPM1A	P35813	O75688;P35813	PPM1A_HUMAN	Protein phosphatase 1A	0.0598945	0.668488	0.295589	0.661159
IGFALS	P35858	P35858	ALS_HUMAN	Insulin-like growth factor-binding protein complex acid labile subunit	-0.0794639	-0.537067	0.22684	0.732442
AHR	P35869	P35869	AHR_HUMAN	Aryl hydrocarbon receptor	0.338938	1.78671	1.10307	0.168595
HMGCL	P35914	P35914	HMGCL_HUMAN	Hydroxymethylglutaryl-CoA lyase, mitochondrial	0.0773944	0.563859	0.24042	0.718479
PSMC2	P35998	P35998	PRS7_HUMAN	26S proteasome regulatory subunit 7	-0.163101	-1.8962	1.20345	0.139373
CHI3L1	P36222	P36222	CH3L1_HUMAN	Chitinase-3-like protein 1	0.814876	3.05902	2.48445	0.0111236
ARL2	P36404	P36404	ARL2_HUMAN	ADP-ribosylation factor-like protein 2	-0.324188	-2.94044	2.33711	0.0150406
ARL3	P36405	P36405	ARL3_HUMAN	ADP-ribosylation factor-like protein 3	-0.452342	-3.25533	2.73586	0.00667147
TRIM23	P36406	P36406	TRI23_HUMAN	E3 ubiquitin-protein ligase TRIM23	-0.154406	-0.369329	0.146825	0.822236
MAP2K2	P36507	P36507	MP2K2_HUMAN	Dual specificity mitogen-activated protein kinase kinase 2	0.0335058	0.54801	0.23236	0.72677
ATP5F1C	P36542	P36542	ATPG_HUMAN	ATP synthase subunit gamma, mitochondrial	0.0505169	0.349981	0.138144	0.831881
ATP6V1E1	P36543	P36543	VATE1_HUMAN	V-type proton ATPase subunit E 1	0.0758885	0.555511	0.236165	0.722916
CPOX	P36551	P36551	HEM6_HUMAN	Oxygen-dependent coproporphyrinogen-III oxidase, mitochondrial	-0.267829	-1.65316	0.985676	0.20828
ARR3	P36575	P36575	ARRC_HUMAN	Arrestin-C	0.534163	2.70157	2.05115	0.0267549
RPL4	P36578	P36578	RL4_HUMAN	Large ribosomal subunit protein uL4	0.037062	0.325495	0.127318	0.843663
NUDT1	P36639	P36639	8ODP_HUMAN	Oxidized purine nucleoside triphosphate hydrolase	-0.297962	-3.10722	2.54533	0.00976959
LONP1	P36776	P36776	LONM_HUMAN	Lon protease homolog, mitochondrial	-0.291369	-1.61615	0.954133	0.219566
PGM1	P36871	P36871	PGM1_HUMAN	Phosphoglucomutase-1	0.583033	3.49828	3.05926	0.00349875
PPP1CC	P36873	P36873	PP1G_HUMAN	Serine/threonine-protein phosphatase PP1-gamma catalytic subunit	-0.393611	-4.03844	3.82218	0.000630857
BMPR1A	P36894	P36894	BMR1A_HUMAN	Bone morphogenetic protein receptor type-1A	-0.183091	-1.69962	1.02589	0.193465
GNL1	P36915	P36915	GNL1_HUMAN	Guanine nucleotide-binding protein-like 1	-0.0430431	-0.349522	0.137939	0.832124
POLR2I	P36954	P36954	RPB9_HUMAN	DNA-directed RNA polymerase II subunit RPB9	-0.0587783	-0.515277	0.21596	0.744844
SERPINF1	P36955	P36955	PEDF_HUMAN	Pigment epithelium-derived factor	-0.367777	-2.08288	1.38307	0.0997803
DLST	P36957	P36957	ODO2_HUMAN	Dihydrolipoyllysine-residue succinyltransferase component of 2-oxoglutarate dehydrogenase complex, mitochondrial	0.0256823	0.16541	0.0609005	0.920957
GMPR	P36959	P36959	GMPR1_HUMAN	GMP reductase 1	0.447745	2.07605	1.37631	0.100975
GPX4	P36969	P36969	GPX4_HUMAN	Phospholipid hydroperoxide glutathione peroxidase	0.134127	0.986366	0.484408	0.491234
SRP14	P37108	P37108	SRP14_HUMAN	Signal recognition particle 14 kDa protein	-0.747081	-5.65791	6.3789	0
NUP62	P37198	P37198	NUP62_HUMAN	Nuclear pore glycoprotein p62	-0.260983	-3.83186	3.52371	0.00125538
HPCAL1	P37235	P37235	HPCL1_HUMAN	Hippocalcin-like protein 1	-0.0118554	-0.0929817	0.0332868	0.957128
FDFT1	P37268	P37268	FDFT_HUMAN	Squalene synthase	-0.329239	-1.6057	0.945306	0.222836
TAGLN2	P37802	P37802	TAGL2_HUMAN	Transgelin-2	0.127205	0.907096	0.434308	0.532104
TALDO1	P37837	P37837	TALDO_HUMAN	Transaldolase	0.0337192	0.225569	0.0849809	0.890462
SNCA	P37840	P37840	SYUA_HUMAN	Alpha-synuclein	0.0504734	0.244497	0.092775	0.882133
ETFB	P38117	P38117	ETFB_HUMAN	Electron transfer flavoprotein subunit beta	0.283767	2.57977	1.91113	0.035578
RBMX	P38159	P38159;Q96E39	RBMX_HUMAN	RNA-binding motif protein, X chromosome	-0.576389	-5.24955	5.70529	1.21212e-05
COIL	P38432	P38432	COIL_HUMAN	Coilin	-0.26892	-2.13548	1.43557	0.0901964
GGCX	P38435	P38435	VKGC_HUMAN	Vitamin K-dependent gamma-carboxylase	0.0854502	0.723982	0.326242	0.630757
LIPA	P38571	P38571	LICH_HUMAN	Lysosomal acid lipase/cholesteryl ester hydrolase	0.427229	2.44125	1.75684	0.048381
ATP6V1A	P38606	P38606	VATA_HUMAN	V-type proton ATPase catalytic subunit A	0.0902298	0.612678	0.265736	0.693551
HSPA9	P38646	P38646	GRP75_HUMAN	Stress-70 protein, mitochondrial	0.0819772	0.502562	0.209678	0.752219
EIF4A3	P38919	P38919	IF4A3_HUMAN	Eukaryotic initiation factor 4A-III	-0.459124	-5.26905	5.7371	1.23077e-05
IGHMBP2	P38935	P38935	SMBP2_HUMAN	DNA-binding protein SMUBP-2	0.137096	1.17729	0.61336	0.395059
RPS19	P39019	P39019	RS19_HUMAN	Small ribosomal subunit protein eS19	0.0188797	0.261992	0.100072	0.873279
RPL3	P39023	P39023	RL3_HUMAN	Large ribosomal subunit protein uL3	-0.0271454	-0.264938	0.10131	0.872471
COL18A1	P39060	P39060	COIA1_HUMAN	Collagen alpha-1(XVIII) chain	-0.434536	-1.89415	1.20154	0.139705
DDOST	P39656	P39656	OST48_HUMAN	Dolichyl-diphosphooligosaccharide--protein glycosyltransferase 48 kDa subunit	0.0268861	0.327168	0.128052	0.842573
ANP32A	P39687	P39687;O43423	AN32A_HUMAN	Acidic leucine-rich nuclear phosphoprotein 32 family member A	-0.256847	-2.07845	1.37869	0.100597
FEN1	P39748	P39748	FEN1_HUMAN	Flap endonuclease 1	-0.443563	-2.44855	1.76484	0.0475007
CUX1	P39880	P39880	CUX1_HUMAN	Homeobox protein cut-like 1	-0.180115	-2.39391	1.70534	0.0530803
CAPG	P40121	P40121	CAPG_HUMAN	Macrophage-capping protein	0.0207696	0.0972961	0.03489	0.955654
CAP2	P40123	P40123	CAP2_HUMAN	Adenylyl cyclase-associated protein 2	-0.455184	-2.48051	1.80003	0.0443636
TXLNA	P40222	P40222	TXLNA_HUMAN	Alpha-taxilin	0.223235	2.04453	1.34531	0.107135
CCT6A	P40227	P40227	TCPZ_HUMAN	T-complex protein 1 subunit zeta	0.0438159	0.456311	0.187246	0.775886
PSMB10	P40306	P40306	PSB10_HUMAN	Proteasome subunit beta type-10	1.72121	7.36148	9.29409	0
VHL	P40337	P40337	VHL_HUMAN	von Hippel-Lindau disease tumor suppressor	-0.402858	-3.25354	2.73353	0.00667529
PBX1	P40424	P40424;P40425;P40426	PBX1_HUMAN	Pre-B-cell leukemia transcription factor 1	-1.00627	-8.29905	10.9209	0
PBX2	P40425	P40425	PBX2_HUMAN	Pre-B-cell leukemia transcription factor 2	-0.704186	-5.32806	5.8336	0
RPL13A	P40429	Q6NVV1;P40429	RL13A_HUMAN	Large ribosomal subunit protein uL13	-0.142058	-1.52657	0.87958	0.249913
ARL1	P40616	P40616	ARL1_HUMAN	ADP-ribosylation factor-like protein 1	0.411141	4.14623	3.98097	0.00044226
MLH1	P40692	P40692	MLH1_HUMAN	DNA mismatch repair protein Mlh1	-0.419565	-4.98938	5.28464	9.70874e-06
STAT3	P40763	P40763	STAT3_HUMAN	Signal transducer and activator of transcription 3	0.268585	2.20875	1.51008	0.0780698
USP8	P40818	P40818	UBP8_HUMAN	Ubiquitin carboxyl-terminal hydrolase 8	0.257958	2.88494	2.26935	0.0172642
PEX19	P40855	P40855	PEX19_HUMAN	Peroxisomal biogenesis factor 19	-0.205846	-2.11567	1.41571	0.0937316
MDH1	P40925	P40925	MDHC_HUMAN	Malate dehydrogenase, cytoplasmic	0.0227463	0.201823	0.0753507	0.90193
MDH2	P40926	P40926	MDHM_HUMAN	Malate dehydrogenase, mitochondrial	0.0813497	0.444306	0.181531	0.781053
RFC5	P40937	P40937	RFC5_HUMAN	Replication factor C subunit 5	-0.34995	-3.97038	3.72298	0.000815789
RFC3	P40938	P40938	RFC3_HUMAN	Replication factor C subunit 3	-0.435366	-4.6994	4.82508	4.43623e-05
HADHA	P40939	P40939	ECHA_HUMAN	Trifunctional enzyme subunit alpha, mitochondrial	0.107721	0.738555	0.334453	0.622567
EIF2S3	P41091	Q2VIR3;P41091	IF2G_HUMAN	Eukaryotic translation initiation factor 2 subunit 3	0.0557491	0.637914	0.279114	0.680185
CETN2	P41208	P41208	CETN2_HUMAN	Centrin-2	-0.289436	-2.4284	1.7428	0.0494668
ETV6	P41212	P41212	ETV6_HUMAN	Transcription factor ETV6	0.0272482	0.229664	0.0866585	0.888264
EIF2D	P41214	P41214	EIF2D_HUMAN	Eukaryotic translation initiation factor 2D	0.177066	1.26718	0.67813	0.352804
MNDA	P41218	P41218	MNDA_HUMAN	Myeloid cell nuclear differentiation antigen	0.976381	2.89754	2.28467	0.0167494
PTGDS	P41222	P41222	PTGDS_HUMAN	Prostaglandin-H2 D-isomerase	-0.220704	-0.532948	0.224772	0.734585
BUD31	P41223	P41223	BUD31_HUMAN	Protein BUD31 homolog	-0.431266	-5.58095	6.25083	0
UBA7	P41226	P41226	UBA7_HUMAN	Ubiquitin-like modifier-activating enzyme 7	0.705361	3.76136	3.42369	0.00147307
NAA10	P41227	Q9BSU3;P41227	NAA10_HUMAN	N-alpha-acetyltransferase 10	0.0804786	0.867942	0.410303	0.551811
KDM5C	P41229	Q9BY66;P41229	KDM5C_HUMAN	Lysine-specific demethylase 5C	-0.11673	-1.05892	0.532028	0.455843
PPP1R2	P41236	Q6NXS1;P41236	IPP2_HUMAN	Protein phosphatase inhibitor 2	-0.0171222	-0.148291	0.054239	0.928952
CSK	P41240	P41240	CSK_HUMAN	Tyrosine-protein kinase CSK	0.0737193	0.702353	0.31418	0.642486
PNPLA4	P41247	P41247	PLPL4_HUMAN	Patatin-like phospholipase domain-containing protein 4	0.337091	1.19481	0.625779	0.387081
GARS1	P41250	P41250	GARS_HUMAN	Glycine--tRNA ligase	0.272494	2.34768	1.65566	0.0586587
IARS1	P41252	P41252	SYIC_HUMAN	Isoleucine--tRNA ligase, cytoplasmic	0.0180375	0.146592	0.0535825	0.929341
EIF1	P41567	O60739;P41567	EIF1_HUMAN	Eukaryotic translation initiation factor 1	-0.0354882	-0.309388	0.120294	0.85179
PRKCI	P41743	P41743	KPCI_HUMAN	Protein kinase C iota type	-0.144974	-0.76524	0.349661	0.607562
ACTR1B	P42025	P42025	ACTY_HUMAN	Beta-centractin	-0.175694	-1.38064	0.763597	0.304506
ECI1	P42126	P42126	ECI1_HUMAN	Enoyl-CoA delta isomerase 1, mitochondrial	-0.0515801	-0.243249	0.0922578	0.882616
TMPO	P42166	P42166	LAP2A_HUMAN	Lamina-associated polypeptide 2, isoform alpha	-0.660708	-5.02201	5.33698	9.95025e-06
STAT1	P42224	P42224	STAT1_HUMAN	Signal transducer and activator of transcription 1-alpha/beta	0.426634	1.94626	1.25059	0.127528
STAT6	P42226	P42226	STAT6_HUMAN	Signal transducer and activator of transcription 6	-0.0436362	-0.298755	0.1157	0.855741
STAT5A	P42229	P42229	STA5A_HUMAN	Signal transducer and activator of transcription 5A	0.131707	1.02213	0.507672	0.473036
MTREX	P42285	P42285	MTREX_HUMAN	Exosome RNA helicase MTR4	-0.349127	-4.92007	5.17385	8.98876e-06
AKR1C3	P42330	P42330	AK1C3_HUMAN	Aldo-keto reductase family 1 member C3	1.08267	2.56915	1.89912	0.0364932
ARHGAP25	P42331	P42331	RHG25_HUMAN	Rho GTPase-activating protein 25	0.309392	1.80704	1.12143	0.162977
PIK3CA	P42336	P42336	PK3CA_HUMAN	Phosphatidylinositol 4,5-bisphosphate 3-kinase catalytic subunit alpha isoform	-0.00761014	-0.073753	0.0262054	0.966359
PIK3CB	P42338	P42338	PK3CB_HUMAN	Phosphatidylinositol 4,5-bisphosphate 3-kinase catalytic subunit beta isoform	0.170228	1.7432	1.06421	0.180387
MTOR	P42345	P42345	MTOR_HUMAN	Serine/threonine-protein kinase mTOR	-0.0162506	-0.277421	0.106582	0.867075
PI4KA	P42356	P42356	PI4KA_HUMAN	Phosphatidylinositol 4-kinase alpha	0.370244	4.5795	4.63827	0.000100671
EPS15	P42566	P42566	EPS15_HUMAN	Epidermal growth factor receptor substrate 15	0.151586	1.96306	1.26656	0.124123
CASP3	P42574	P42574	CASP3_HUMAN	Caspase-3	0.00109876	0.00903537	0.00312951	0.996646
CASP2	P42575	P42575	CASP2_HUMAN	Caspase-2	-0.409995	-3.5228	3.09261	0.00326904
RPS27	P42677	P42677;Q71UM5	RS27_HUMAN	Small ribosomal subunit protein eS27	-0.0984505	-0.8853	0.420885	0.544785
TEC	P42680	P42680	TEC_HUMAN	Tyrosine-protein kinase Tec	-0.104691	-0.762233	0.347936	0.608895
ABL2	P42684	P42684	ABL2_HUMAN	Tyrosine-protein kinase ABL2	0.0476726	0.476452	0.196934	0.765347
HELZ	P42694	P42694	HELZ_HUMAN	Probable helicase with zinc finger domain	-0.0637771	-0.85196	0.400646	0.560459
NCAPD3	P42695	P42695	CNDD3_HUMAN	Condensin-2 complex subunit D3	-0.172009	-1.39004	0.770866	0.300849
RBM34	P42696	P42696	RBM34_HUMAN	RNA-binding protein 34	-0.157902	-2.14258	1.44272	0.0892145
LRPPRC	P42704	P42704	LPPRC_HUMAN	Leucine-rich PPR motif-containing protein, mitochondrial	-0.176663	-1.44469	0.813669	0.280147
ACAA2	P42765	P42765	THIM_HUMAN	3-ketoacyl-CoA thiolase, mitochondrial	-0.436585	-2.76495	2.12557	0.0230807
RPL35	P42766	P42766	RL35_HUMAN	Large ribosomal subunit protein uL29	-0.205929	-1.8113	1.12529	0.162001
CDKN2A	P42771	P42772;P42771	CDN2A_HUMAN	Cyclin-dependent kinase inhibitor 2A	-0.628741	-1.27034	0.68046	0.35149
PRCP	P42785	P42785	PCP_HUMAN	Lysosomal Pro-X carboxypeptidase	-0.308783	-2.04918	1.34986	0.106127
HTT	P42858	P42858	HD_HUMAN	Huntingtin	-0.10451	-0.798878	0.369154	0.588149
ECE1	P42892	P42892	ECE1_HUMAN	Endothelin-converting enzyme 1	-0.239866	-1.34122	0.733434	0.320532
MTHFR	P42898	P42898	MTHR_HUMAN	Methylenetetrahydrofolate reductase (NADPH)	0.409831	2.27465	1.57844	0.0679967
SLC1A3	P43003	P43003	EAA1_HUMAN	Excitatory amino acid transporter 1	-0.102267	-0.507337	0.212031	0.749476
PAFAH1B1	P43034	P43034	LIS1_HUMAN	Platelet-activating factor acetylhydrolase IB subunit beta	0.0491741	0.477875	0.197623	0.764691
MCAM	P43121	P43121	MUC18_HUMAN	Cell surface glycoprotein MUC18	-0.554413	-2.63605	1.97533	0.031224
CRAT	P43155	P43155	CACP_HUMAN	Carnitine O-acetyltransferase	0.848399	2.90887	2.29847	0.0162145
MATR3	P43243	P43243	MATR3_HUMAN	Matrin-3	-0.542614	-4.43653	4.41818	0.000204511
MSH2	P43246	P43246	MSH2_HUMAN	DNA mismatch repair protein Msh2	-0.714171	-6.50454	7.81335	0
GRK6	P43250	P43250;P34947	GRK6_HUMAN	G protein-coupled receptor kinase 6	0.204194	1.74811	1.06857	0.178977
BTD	P43251	P43251	BTD_HUMAN	Biotinidase	0.339796	2.18265	1.48336	0.0823157
GPD2	P43304	P43304	GPDM_HUMAN	Glycerol-3-phosphate dehydrogenase, mitochondrial	-0.0730315	-0.348018	0.137269	0.832583
SSR1	P43307	P43307	SSRA_HUMAN	Translocon-associated protein subunit alpha	0.192224	1.61755	0.955313	0.21936
ALDH3B1	P43353	P43353	AL3B1_HUMAN	Aldehyde dehydrogenase family 3 member B1	0.63921	2.55376	1.88176	0.037731
PTPN9	P43378	P43378	PTN9_HUMAN	Tyrosine-protein phosphatase non-receptor type 9	0.0538175	0.635109	0.277618	0.68167
SYK	P43405	P43405	KSYK_HUMAN	Tyrosine-protein kinase SYK	-0.467783	-2.71111	2.06229	0.0261197
RANBP1	P43487	P43487	RANG_HUMAN	Ran-specific GTPase-activating protein	-0.143413	-0.693823	0.309463	0.647493
NAMPT	P43490	P43490	NAMPT_HUMAN	Nicotinamide phosphoribosyltransferase	0.171976	1.53267	0.884576	0.248044
AFM	P43652	P43652	AFAM_HUMAN	Afamin	-0.295656	-1.71784	1.04184	0.187848
PSMC4	P43686	P43686	PRS6B_HUMAN	26S proteasome regulatory subunit 6B	-0.161697	-2.27705	1.58095	0.0676732
TSFM	P43897	P43897	EFTS_HUMAN	Elongation factor Ts, mitochondrial	-0.26107	-2.25586	1.55882	0.0708878
PPIC	P45877	P45877	PPIC_HUMAN	Peptidyl-prolyl cis-trans isomerase C	0.73782	3.67703	3.30534	0.00194254
VDAC2	P45880	P45880	VDAC2_HUMAN	Voltage-dependent anion-selective channel protein 2	-0.100743	-0.595987	0.256997	0.70245
ACADSB	P45954	P45954	ACDSB_HUMAN	Short/branched chain specific acyl-CoA dehydrogenase, mitochondrial	0.194942	1.24403	0.661203	0.363055
CBX5	P45973	P45973	CBX5_HUMAN	Chromobox protein homolog 5	-1.23986	-8.05222	10.4932	0
USP5	P45974	P45974	UBP5_HUMAN	Ubiquitin carboxyl-terminal hydrolase 5	-0.395762	-2.55145	1.87916	0.0379397
MAPK9	P45984	P45984	MK09_HUMAN	Mitogen-activated protein kinase 9	0.135522	1.58395	0.927042	0.230014
MAP2K4	P45985	P45985	MP2K4_HUMAN	Dual specificity mitogen-activated protein kinase kinase 4	0.0291744	0.225492	0.0849494	0.890386
MKI67	P46013	P46013	KI67_HUMAN	Proliferation marker protein Ki-67	-0.248301	-1.16518	0.604833	0.401626
PHKA2	P46019	P46019	KPB2_HUMAN	Phosphorylase b kinase regulatory subunit alpha, liver isoform	0.217925	1.9365	1.24133	0.129701
PHKA1	P46020	P46020	KPB1_HUMAN	Phosphorylase b kinase regulatory subunit alpha, skeletal muscle isoform	0.0890772	0.346029	0.136384	0.833149
RANGAP1	P46060	P46060	RAGP1_HUMAN	Ran GTPase-activating protein 1	-0.170799	-2.24574	1.54829	0.0723833
RECQL	P46063	P46063	RECQ1_HUMAN	ATP-dependent DNA helicase Q1	-0.249362	-1.68285	1.01129	0.199098
NOP2	P46087	P46087	NOP2_HUMAN	Probable 28S rRNA (cytosine(4447)-C(5))-methyltransferase	-0.00926124	-0.0778022	0.0276879	0.964164
ATRX	P46100	P46100	ATRX_HUMAN	Transcriptional regulator ATRX	-0.142156	-1.60515	0.94484	0.222962
CRK	P46108	P46108	CRK_HUMAN	Adapter molecule crk	0.00823072	0.0884794	0.0316194	0.959041
CRKL	P46109	P46109	CRKL_HUMAN	Crk-like protein	-0.168172	-1.32908	0.724247	0.325619
MTIF2	P46199	P46199	IF2M_HUMAN	Translation initiation factor IF-2, mitochondrial	-0.0501435	-0.502903	0.209846	0.752035
BAG6	P46379	P46379	BAG6_HUMAN	Large proline-rich protein BAG6	-0.0134203	-0.143026	0.0522067	0.930813
NSF	P46459	P46459	NSF_HUMAN	Vesicle-fusing ATPase	0.399806	3.84324	3.53995	0.00121237
CDKN1B	P46527	P46527	CDN1B_HUMAN	Cyclin-dependent kinase inhibitor 1B	0.0793188	0.215106	0.0807176	0.895049
MAP2K3	P46734	P46734	MP2K3_HUMAN	Dual specificity mitogen-activated protein kinase kinase 3	-0.136772	-1.7723	1.09013	0.172528
BRCC3	P46736	P46736	BRCC3_HUMAN	Lys-63-specific deubiquitinase BRCC36	0.0292314	0.383278	0.153153	0.815969
RPL27A	P46776	P46776	RL27A_HUMAN	Large ribosomal subunit protein uL15	0.00137534	0.0125902	0.00436691	0.994486
RPL5	P46777	P46777	RL5_HUMAN	Large ribosomal subunit protein uL18	-0.115399	-1.18456	0.618502	0.392063
RPL21	P46778	P46778	RL21_HUMAN	Large ribosomal subunit protein eL21	0.0174938	0.15714	0.057672	0.925034
RPL28	P46779	P46779	RL28_HUMAN	Large ribosomal subunit protein eL28	-0.0420187	-0.386066	0.154425	0.814628
RPS9	P46781	P46781	RS9_HUMAN	Small ribosomal subunit protein uS4	-0.0605064	-0.889763	0.423621	0.542716
RPS5	P46782	P46782	RS5_HUMAN	Small ribosomal subunit protein uS7	-0.158492	-1.51054	0.866508	0.255669
RPS10	P46783	P46783	RS10_HUMAN	Small ribosomal subunit protein eS10	-0.0519717	-0.631324	0.275602	0.683369
MAP1B	P46821	P46821	MAP1B_HUMAN	Microtubule-associated protein 1B	-0.776407	-3.41134	2.94203	0.00439334
GNPDA1	P46926	P46926;Q8TDQ7	GNPI1_HUMAN	Glucosamine-6-phosphate isomerase 1	0.220585	1.93626	1.24111	0.129725
YAP1	P46937	P46937	YAP1_HUMAN	Transcriptional coactivator YAP1	-0.192918	-1.60059	0.941003	0.224446
UTRN	P46939	P46939	UTRN_HUMAN	Utrophin	-0.0589324	-0.557732	0.237295	0.721809
IQGAP1	P46940	P46940	IQGA1_HUMAN	Ras GTPase-activating-like protein IQGAP1	0.881953	6.13101	7.17546	0
HAAO	P46952	P46952	3HAO_HUMAN	3-hydroxyanthranilate 3,4-dioxygenase	-0.331864	-1.2519	0.666937	0.359195
GYG1	P46976	P46976	GLYG_HUMAN	Glycogenin-1	0.587495	3.70827	3.34901	0.00173421
STT3A	P46977	P46977	STT3A_HUMAN	Dolichyl-diphosphooligosaccharide--protein glycosyltransferase subunit STT3A	0.213175	2.69215	2.04018	0.0273759
RABIF	P47224	P47224	MSS4_HUMAN	Guanine nucleotide exchange factor MSS4	0.126221	0.972837	0.475715	0.498062
PLA2G4A	P47712	P47712	PA24A_HUMAN	Cytosolic phospholipase A2	-0.097893	-0.534157	0.225379	0.73409
RAP1GAP	P47736	P47736	RPGP1_HUMAN	Rap1 GTPase-activating protein 1	-0.0316406	-0.180383	0.0667963	0.913971
CAPZA2	P47755	P47755	CAZA2_HUMAN	F-actin-capping protein subunit alpha-2	0.0725203	0.638736	0.279554	0.679647
CAPZB	P47756	P47756	CAPZB_HUMAN	F-actin-capping protein subunit beta	0.11675	1.352	0.741635	0.315709
EIF1AX	P47813	O14602;P47813	IF1AX_HUMAN	Eukaryotic translation initiation factor 1A, X-chromosomal	-0.134154	-0.993936	0.489298	0.487383
QARS1	P47897	P47897	SYQ_HUMAN	Glutamine--tRNA ligase	-0.0109889	-0.112611	0.0406234	0.946961
RPL29	P47914	P47914	RL29_HUMAN	Large ribosomal subunit protein eL29	-0.0190322	-0.203646	0.0760841	0.900878
ID4	P47928	P47928	ID4_HUMAN	DNA-binding protein inhibitor ID-4	-0.714266	-4.17083	4.01748	0.000399002
ZFP36L2	P47974	Q07352;P47974	TISD_HUMAN	mRNA decay activator protein ZFP36L2	0.0361572	0.411934	0.166337	0.799452
UQCRFS1	P47985	P0C7P4;P47985	UCRI_HUMAN	Cytochrome b-c1 complex subunit Rieske, mitochondrial	0.345583	2.09984	1.39991	0.0967074
ATP5PO	P48047	P48047	ATPO_HUMAN	ATP synthase subunit O, mitochondrial	0.108033	0.804374	0.372373	0.586144
LIMS1	P48059	P48059	LIMS1_HUMAN	LIM and senescent cell antigen-like-containing domain protein 1	-0.0330066	-0.291591	0.112623	0.859744
PREP	P48147	P48147	PPCE_HUMAN	Prolyl endopeptidase	-0.267445	-2.42813	1.7425	0.0494584
ME1	P48163	P48163	MAOX_HUMAN	NADP-dependent malic enzyme	0.702502	2.5948	1.9282	0.0343627
IREB2	P48200	P48200	IREB2_HUMAN	Iron-responsive element-binding protein 2	0.655684	3.77552	3.44371	0.00144236
RFX3	P48380	P48378;P48380	RFX3_HUMAN	Transcription factor RFX3	-0.660312	-3.54445	3.12218	0.00305073
RFX5	P48382	P48382	RFX5_HUMAN	DNA-binding protein RFX5	-0.0270296	-0.261665	0.0999349	0.873275
PIP4K2A	P48426	P48426	PI42A_HUMAN	Phosphatidylinositol 5-phosphate 4-kinase type-2 alpha	0.253333	2.74432	2.10124	0.0242495
ARCN1	P48444	P48444	COPD_HUMAN	Coatomer subunit delta	0.288789	3.59295	3.18876	0.00259612
LSS	P48449	P48449	LSS_HUMAN	Lanosterol synthase	0.359926	2.3217	1.62802	0.0619261
PPP3CC	P48454	P48454	PP2BC_HUMAN	Serine/threonine-protein phosphatase 2B catalytic subunit gamma isoform	0.210583	1.85563	1.16583	0.149997
GCLC	P48506	P48506	GSH1_HUMAN	Glutamate--cysteine ligase catalytic subunit	0.0400909	0.416379	0.168405	0.797033
GCLM	P48507	P48507	GSH0_HUMAN	Glutamate--cysteine ligase regulatory subunit	0.209314	1.46411	0.829101	0.27283
CD151	P48509	P48509	CD151_HUMAN	CD151 antigen	0.101149	0.782121	0.359399	0.596945
PCP4	P48539	P48539	PCP4_HUMAN	Calmodulin regulator protein PCP4	-0.996935	-1.66416	0.995134	0.205
TRAPPC10	P48553	P48553	TPC10_HUMAN	Trafficking protein particle complex subunit 10	0.0979644	0.824595	0.384299	0.575457
PSMD8	P48556	P48556	PSMD8_HUMAN	26S proteasome non-ATPase regulatory subunit 8	-0.205693	-2.47652	1.79562	0.0446219
PRRC2A	P48634	P48634	PRC2A_HUMAN	Protein PRRC2A	-0.142432	-1.90439	1.21111	0.137305
GSS	P48637	P48637	GSHB_HUMAN	Glutathione synthetase	-0.0953043	-0.865534	0.408844	0.553157
CCT5	P48643	P48643	TCPE_HUMAN	T-complex protein 1 subunit epsilon	-0.0564051	-0.548296	0.232505	0.726666
PTDSS1	P48651	P48651	PTSS1_HUMAN	Phosphatidylserine synthase 1	-0.128978	-1.46627	0.830832	0.271966
NES	P48681	P48681	NEST_HUMAN	Nestin	-0.922948	-5.85879	6.71528	0
HSPA13	P48723	P48723	HSP13_HUMAN	Heat shock 70 kDa protein 13	-0.280695	-3.31182	2.80988	0.00577745
CSNK1A1	P48729	P48729;Q8N752	KC1A_HUMAN	Casein kinase I isoform alpha	0.197511	3.31015	2.80768	0.00580328
CSNK1D	P48730	P49674;P48730	KC1D_HUMAN	Casein kinase I isoform delta	-0.0269171	-0.331144	0.1298	0.840276
IDH2	P48735	P48735	IDHP_HUMAN	Isocitrate dehydrogenase [NADP], mitochondrial	0.309952	1.51753	0.872198	0.253148
PITPNB	P48739	P48739	PIPNB_HUMAN	Phosphatidylinositol transfer protein beta isoform	0.140758	1.30946	0.709494	0.334149
ADGRE5	P48960	P48960	AGRE5_HUMAN	Adhesion G protein-coupled receptor E5	-0.00147029	-0.0141689	0.00491759	0.993725
POLD2	P49005	P49005	DPOD2_HUMAN	DNA polymerase delta subunit 2	-0.325022	-3.37809	2.89762	0.00483346
MARCKSL1	P49006	P49006	MRP_HUMAN	MARCKS-related protein	-0.820278	-3.73219	3.38259	0.00158548
PXN	P49023	P49023	PAXI_HUMAN	Paxillin	-0.161158	-1.81685	1.13033	0.160922
CAMLG	P49069	P49069	CAMLG_HUMAN	Guided entry of tail-anchored proteins factor CAMLG	-0.279609	-1.66811	0.998537	0.203699
NR2C2	P49116	P49116	NR2C2_HUMAN	Nuclear receptor subfamily 2 group C member 2	-0.364526	-4.60435	4.67682	8.93471e-05
MAPKAPK2	P49137	P49137	MAPK2_HUMAN	MAP kinase-activated protein kinase 2	-0.125989	-1.51174	0.86748	0.255364
ALDH9A1	P49189	P49189	AL9A1_HUMAN	4-trimethylaminobutyraldehyde dehydrogenase	0.0972767	0.715426	0.321453	0.635904
RPL34	P49207	P49207	RL34_HUMAN	Large ribosomal subunit protein eL34	0.117123	1.3937	0.773698	0.299318
RPIA	P49247	P49247	RPIA_HUMAN	Ribose-5-phosphate isomerase	-0.333303	-2.53425	1.85984	0.0393794
LMAN1	P49257	P49257	LMAN1_HUMAN	Protein ERGIC-53	-0.070401	-0.635907	0.278043	0.681294
NASP	P49321	P49321	NASP_HUMAN	Nuclear autoantigenic sperm protein	-0.533708	-3.13638	2.58243	0.00913557
FASN	P49327	P49327	FAS_HUMAN	Fatty acid synthase	-0.102619	-0.48384	0.200519	0.761929
FNTA	P49354	P49354	FNTA_HUMAN	Protein farnesyltransferase/geranylgeranyltransferase type-1 subunit alpha	0.117997	1.07582	0.543367	0.446292
FNTB	P49356	P49356	FNTB_HUMAN	Protein farnesyltransferase subunit beta	-0.156487	-1.47915	0.841149	0.267005
DHPS	P49366	P49366	DHYS_HUMAN	Deoxyhypusine synthase	-0.5324	-2.90143	2.2894	0.0166217
CCT3	P49368	P49368	TCPG_HUMAN	T-complex protein 1 subunit gamma	-0.0510516	-0.494025	0.205488	0.756535
MRPL19	P49406	P49406	RM19_HUMAN	Large ribosomal subunit protein bL19m	0.0117468	0.106404	0.0382916	0.950222
ARRB1	P49407	P49407	ARRB1_HUMAN	Beta-arrestin-1	0.469226	2.65638	1.99873	0.0296924
TUFM	P49411	P49411	EFTU_HUMAN	Elongation factor Tu, mitochondrial	-0.151808	-1.0466	0.523827	0.461348
ALDH7A1	P49419	P49419	AL7A1_HUMAN	Alpha-aminoadipic semialdehyde dehydrogenase	-0.683906	-2.32538	1.63192	0.0614417
CDC34	P49427	P49427	UB2R1_HUMAN	Ubiquitin-conjugating enzyme E2 R1	-0.241484	-0.881601	0.418622	0.546033
INPP1	P49441	P49441	INPP_HUMAN	Inositol polyphosphate 1-phosphatase	0.176919	1.29665	0.699933	0.339778
CENPA	P49450	P49450	CENPA_HUMAN	Histone H3-like centromeric protein A	-0.480542	-3.40597	2.93483	0.00444795
SRP9	P49458	P49458	SRP09_HUMAN	Signal recognition particle 9 kDa protein	-0.827389	-6.46932	7.75294	0
UBE2A	P49459	P49459	UBE2A_HUMAN	Ubiquitin-conjugating enzyme E2 A	-0.135714	-1.1805	0.615626	0.394043
PCYT1A	P49585	P49585	PCY1A_HUMAN	Choline-phosphate cytidylyltransferase A	-0.0345584	-0.238554	0.0903165	0.884604
AARS1	P49588	P49588	SYAC_HUMAN	Alanine--tRNA ligase, cytoplasmic	0.0202533	0.167308	0.0616442	0.920009
CARS1	P49589	P49589	SYCC_HUMAN	Cysteine--tRNA ligase, cytoplasmic	-0.00680336	-0.0666806	0.0236269	0.969384
HARS2	P49590	P49590	SYHM_HUMAN	Histidine--tRNA ligase, mitochondrial	-0.0766763	-0.510842	0.213763	0.747307
SARS1	P49591	P49591	SYSC_HUMAN	Serine--tRNA ligase, cytoplasmic	0.0914848	1.0074	0.49804	0.481082
PPM1F	P49593	P49593	PPM1F_HUMAN	Protein phosphatase 1F	-0.0964867	-0.529471	0.22303	0.736891
MAN2A2	P49641	P49641	MA2A2_HUMAN	Alpha-mannosidase 2x	-0.089283	-0.619042	0.269091	0.690832
PRIM1	P49642	P49642	PRI1_HUMAN	DNA primase small subunit	-0.498534	-2.24179	1.5442	0.0729911
PRIM2	P49643	P49643	PRI2_HUMAN	DNA primase large subunit	-0.437948	-2.18411	1.48485	0.082131
CSNK1E	P49674	P49674	KC1E_HUMAN	Casein kinase I isoform epsilon	-0.597765	-2.69347	2.04171	0.0273134
PSMB3	P49720	P49720	PSB3_HUMAN	Proteasome subunit beta type-3	0.0494791	0.61123	0.264975	0.694531
PSMB2	P49721	P49721	PSB2_HUMAN	Proteasome subunit beta type-2	0.05981	0.77086	0.352893	0.604279
MCM2	P49736	P49736	MCM2_HUMAN	DNA replication licensing factor MCM2	-0.851374	-3.78992	3.4641	0.00137177
THBS3	P49746	P49746	TSP3_HUMAN	Thrombospondin-3	-1.0942	-4.82199	5.01807	2.44898e-05
ACADVL	P49748	P49748	ACADV_HUMAN	Very long-chain specific acyl-CoA dehydrogenase, mitochondrial	0.0577502	0.3442	0.135571	0.833583
YLPM1	P49750	P49750	YLPM1_HUMAN	YLP motif-containing protein 1	-0.473205	-5.38385	5.92516	0
VPS41	P49754	P49754	VPS41_HUMAN	Vacuolar protein sorting-associated protein 41 homolog	0.0645134	0.654872	0.288216	0.66997
TMED10	P49755	P49755	TMEDA_HUMAN	Transmembrane emp24 domain-containing protein 10	0.128103	1.41237	0.788234	0.29238
RBM25	P49756	P49756	RBM25_HUMAN	RNA-binding protein 25	-0.314726	-4.28725	4.19166	0.000284564
NUMB	P49757	P49757	NUMB_HUMAN	Protein numb homolog	0.0634774	0.406804	0.163959	0.80276
CLK2	P49760	P49760	CLK2_HUMAN	Dual specificity protein kinase CLK2	-0.422573	-5.79451	6.60733	0
CLK3	P49761	P49761	CLK3_HUMAN	Dual specificity protein kinase CLK3	-0.113099	-1.03114	0.513594	0.468327
PSEN1	P49768	P49768	PSN1_HUMAN	Presenilin-1	-0.0148793	-0.145939	0.0533301	0.929724
[truncated: 4,868 more rows]
