# Supplementary material for: Spatial proteomics of ovarian cancer precursors delineates early disease changes and drug targets
Source: Mol Syst Biol. 2025 Nov 13;22(1):7–41. doi: 10.1038/s44320-025-00168-4 (PMC12759074; doi:10.1038/s44320-025-00168-4)
Supplement: Supplementary file 18 — Dataset EV12 [file 44320_2025_168_MOESM18_ESM.xlsx]

## Sheet: Legend
Dataset EV12. Pathway enrichment analysis highlighting overrepresented pathways (Hallmark, Reactome, Wikipathways) for cluster 1 and 2 carcinoma samples. Related to figure 4D.

## Sheet: Dataset EV12
C: Column	C: Type	C: Name	N: Size	N: Score	N: P value	N: Benj. Hoch. FDR	N: Mean	N: Median
Student's T-test Difference Cluster 1 tumors_Cluster 2 tumors	Student's T-test significant	1_2	2258	-0.37827	1.76692e-143	1.76692e-143	-0.186397	-0.359147
Student's T-test Difference Cluster 1 tumors_Cluster 2 tumors	Student's T-test Significant 1_2	+	2258	-0.37827	1.76692e-143	1.76692e-143	-0.186397	-0.359147
Student's T-test Difference Cluster 1 tumors_Cluster 2 tumors	Reactome pathway	mRNA Splicing - Major Pathway	170	-0.674384	4.07937e-51	5.91101e-48	-0.42132	-0.42947
Student's T-test Difference Cluster 1 tumors_Cluster 2 tumors	WikiPathway	WP_MRNA_PROCESSING	116	-0.667002	5.7733e-35	4.10482e-32	-0.433983	-0.455493
Student's T-test Difference Cluster 1 tumors_Cluster 2 tumors	Hallmark	HALLMARK_E2F_TARGETS	140	-0.604392	1.51202e-34	7.56012e-33	-0.422483	-0.42598
Student's T-test Difference Cluster 1 tumors_Cluster 2 tumors	Hallmark	HALLMARK_INTERFERON_GAMMA_RESPONSE	101	0.581682	9.20389e-24	2.30097e-22	0.445255	0.336338
Student's T-test Difference Cluster 1 tumors_Cluster 2 tumors	Hallmark	HALLMARK_G2M_CHECKPOINT	119	-0.509467	1.40609e-21	2.34348e-20	-0.37817	-0.397591
Student's T-test Difference Cluster 1 tumors_Cluster 2 tumors	Reactome pathway	Respiratory electron transport	73	0.646021	1.93249e-21	1.40009e-18	0.261327	0.243075
Student's T-test Difference Cluster 1 tumors_Cluster 2 tumors	Reactome pathway	Neutrophil degranulation	318	0.297905	2.58416e-19	1.24815e-16	0.111402	0.0639717
Student's T-test Difference Cluster 1 tumors_Cluster 2 tumors	WikiPathway	WP_NONALCOHOLIC_FATTY_LIVER_DISEASE	92	0.538104	6.75147e-19	2.40015e-16	0.210214	0.215608
Student's T-test Difference Cluster 1 tumors_Cluster 2 tumors	WikiPathway	WP_ELECTRON_TRANSPORT_CHAIN_OXPHOS_SYSTEM_IN_MITOCHONDRIA	65	0.625793	3.41862e-18	8.10212e-16	0.253505	0.243075
Student's T-test Difference Cluster 1 tumors_Cluster 2 tumors	Hallmark	HALLMARK_INTERFERON_ALPHA_RESPONSE	59	0.65558	3.82968e-18	4.7871e-17	0.472544	0.420636
Student's T-test Difference Cluster 1 tumors_Cluster 2 tumors	Reactome pathway	Cleavage of Growing Transcript in the Termination Region	60	-0.610465	3.52691e-16	1.27762e-13	-0.383666	-0.392617
Student's T-test Difference Cluster 1 tumors_Cluster 2 tumors	Reactome pathway	HATs acetylate histones	63	-0.571326	5.37754e-15	1.55841e-12	-0.371832	-0.398608
Student's T-test Difference Cluster 1 tumors_Cluster 2 tumors	Hallmark	HALLMARK_OXIDATIVE_PHOSPHORYLATION	175	0.34485	6.20988e-15	6.20988e-14	0.105396	0.0813497
Student's T-test Difference Cluster 1 tumors_Cluster 2 tumors	Reactome pathway	mRNA Splicing - Minor Pathway	46	-0.657292	1.41526e-14	3.41784e-12	-0.406	-0.413354
Student's T-test Difference Cluster 1 tumors_Cluster 2 tumors	WikiPathway	WP_DNA_REPAIR_PATHWAYS_FULL_NETWORK	73	-0.510261	5.89557e-14	1.04794e-11	-0.332948	-0.327743
Student's T-test Difference Cluster 1 tumors_Cluster 2 tumors	Reactome pathway	RNA Polymerase II Pre-transcription Events	67	-0.53025	7.41611e-14	1.53513e-11	-0.340797	-0.337008
Student's T-test Difference Cluster 1 tumors_Cluster 2 tumors	Reactome pathway	mRNA 3'-end processing	54	-0.584558	1.25961e-13	2.28147e-11	-0.366124	-0.358389
Student's T-test Difference Cluster 1 tumors_Cluster 2 tumors	Reactome pathway	Transport of Mature mRNA derived from an Intron-Containing Transcript	63	-0.537756	1.86141e-13	2.99687e-11	-0.336205	-0.312719
Student's T-test Difference Cluster 1 tumors_Cluster 2 tumors	Hallmark	HALLMARK_PROTEIN_SECRETION	83	0.46528	2.94356e-13	2.45296e-12	0.134502	0.171061
Student's T-test Difference Cluster 1 tumors_Cluster 2 tumors	Reactome pathway	RNA polymerase II transcribes snRNA genes	56	-0.562934	3.6997e-13	5.36086e-11	-0.357945	-0.351441
Student's T-test Difference Cluster 1 tumors_Cluster 2 tumors	Reactome pathway	HDACs deacetylate histones	31	-0.740746	1.02701e-12	1.35285e-10	-0.499642	-0.465696
Student's T-test Difference Cluster 1 tumors_Cluster 2 tumors	WikiPathway	WP_OXIDATIVE_PHOSPHORYLATION	39	0.651315	2.14827e-12	3.05485e-10	0.229506	0.231269
Student's T-test Difference Cluster 1 tumors_Cluster 2 tumors	Reactome pathway	Processing of Capped Intron-Containing Pre-mRNA	36	-0.674434	2.74859e-12	3.31892e-10	-0.451675	-0.455493
Student's T-test Difference Cluster 1 tumors_Cluster 2 tumors	WikiPathway	WP_DNA_REPLICATION	27	-0.757104	1.04595e-11	1.23945e-09	-0.520426	-0.480787
Student's T-test Difference Cluster 1 tumors_Cluster 2 tumors	Reactome pathway	Formation of RNA Pol II elongation complex	51	-0.540666	2.69578e-11	3.00476e-09	-0.347516	-0.337008
Student's T-test Difference Cluster 1 tumors_Cluster 2 tumors	Chromosome	12	346	-0.211841	2.922e-11	1.51944e-09	-0.191782	-0.203563
Student's T-test Difference Cluster 1 tumors_Cluster 2 tumors	WikiPathway	WP_RETINOBLASTOMA_GENE_IN_CANCER	50	-0.544674	3.01067e-11	3.05798e-09	-0.428213	-0.440128
Student's T-test Difference Cluster 1 tumors_Cluster 2 tumors	Reactome pathway	Gap-filling DNA repair synthesis and ligation in TC-NER	51	-0.53845	3.24496e-11	3.35853e-09	-0.334805	-0.337008
Student's T-test Difference Cluster 1 tumors_Cluster 2 tumors	Hallmark	HALLMARK_MYC_TARGETS_V1	189	-0.282345	3.36842e-11	2.40601e-10	-0.234357	-0.181704
Student's T-test Difference Cluster 1 tumors_Cluster 2 tumors	Reactome pathway	SUMOylation of DNA damage response and repair proteins	58	-0.503228	3.85709e-11	3.72595e-09	-0.327079	-0.314627
Student's T-test Difference Cluster 1 tumors_Cluster 2 tumors	Reactome pathway	ERCC6 (CSB) and EHMT2 (G9a) positively regulate rRNA expression	23	-0.790829	5.46687e-11	4.95094e-09	-0.560643	-0.624592
Student's T-test Difference Cluster 1 tumors_Cluster 2 tumors	Reactome pathway	Antigen Presentation: Folding, assembly and peptide loading of class I MHC	23	0.790512	5.56424e-11	4.74269e-09	0.741831	0.453335
Student's T-test Difference Cluster 1 tumors_Cluster 2 tumors	WikiPathway	WP_G1_TO_S_CELL_CYCLE_CONTROL	30	-0.691814	5.81971e-11	5.17226e-09	-0.487485	-0.466784
Student's T-test Difference Cluster 1 tumors_Cluster 2 tumors	Reactome pathway	RNA Polymerase II Transcription Elongation	49	-0.536395	9.18865e-11	7.39687e-09	-0.34624	-0.337008
Student's T-test Difference Cluster 1 tumors_Cluster 2 tumors	Reactome pathway	SUMOylation of chromatin organization proteins	45	-0.558468	9.99401e-11	7.62175e-09	-0.375218	-0.299844
Student's T-test Difference Cluster 1 tumors_Cluster 2 tumors	Reactome pathway	Interferon gamma signaling	39	0.598914	1.05152e-10	7.61825e-09	0.601703	0.397978
Student's T-test Difference Cluster 1 tumors_Cluster 2 tumors	Reactome pathway	Complex I biogenesis	51	0.520793	1.38602e-10	9.56354e-09	0.172213	0.198758
Student's T-test Difference Cluster 1 tumors_Cluster 2 tumors	Reactome pathway	Interferon alpha/beta signaling	32	0.648903	2.25877e-10	1.48771e-08	0.607373	0.616284
Student's T-test Difference Cluster 1 tumors_Cluster 2 tumors	WikiPathway	WP_CELL_CYCLE	61	-0.469682	2.53238e-10	2.00058e-08	-0.339842	-0.325107
Student's T-test Difference Cluster 1 tumors_Cluster 2 tumors	Reactome pathway	Resolution of Sister Chromatid Cohesion	78	-0.410846	4.14468e-10	2.61115e-08	-0.291126	-0.274281
Student's T-test Difference Cluster 1 tumors_Cluster 2 tumors	Reactome pathway	Activation of anterior HOX genes in hindbrain development during early embryogenesis	44	-0.543623	4.80783e-10	2.90272e-08	-0.383146	-0.36312
Student's T-test Difference Cluster 1 tumors_Cluster 2 tumors	Reactome pathway	RUNX1 interacts with co-factors whose precise effect on RUNX1 targets is not known	28	-0.675882	6.35078e-10	3.68091e-08	-0.507572	-0.548953
Student's T-test Difference Cluster 1 tumors_Cluster 2 tumors	Hallmark	HALLMARK_INFLAMMATORY_RESPONSE	36	0.590608	9.28588e-10	5.80367e-09	0.332859	0.290349
Student's T-test Difference Cluster 1 tumors_Cluster 2 tumors	Reactome pathway	Formation of the beta-catenin:TCF transactivating complex	25	-0.70563	1.06496e-09	5.93512e-08	-0.464564	-0.467205
Student's T-test Difference Cluster 1 tumors_Cluster 2 tumors	Reactome pathway	Dual incision in TC-NER	52	-0.487804	1.28616e-09	6.90237e-08	-0.306956	-0.322027
Student's T-test Difference Cluster 1 tumors_Cluster 2 tumors	Reactome pathway	Retrograde transport at the Trans-Golgi-Network	39	0.558965	1.65486e-09	8.5639e-08	0.191792	0.207344
Student's T-test Difference Cluster 1 tumors_Cluster 2 tumors	WikiPathway	WP_BASE_EXCISION_REPAIR	22	-0.742174	1.75122e-09	1.24512e-07	-0.474537	-0.457066
Student's T-test Difference Cluster 1 tumors_Cluster 2 tumors	WikiPathway	WP_MITOCHONDRIAL_COMPLEX_I_ASSEMBLY_MODEL_OXPHOS_SYSTEM	48	0.503019	1.80275e-09	1.16523e-07	0.165865	0.197421
Student's T-test Difference Cluster 1 tumors_Cluster 2 tumors	Reactome pathway	RMTs methylate histone arginines	29	-0.634749	3.47128e-09	1.73444e-07	-0.511301	-0.523274
Student's T-test Difference Cluster 1 tumors_Cluster 2 tumors	Hallmark	HALLMARK_GLYCOLYSIS	127	0.299713	6.81645e-09	3.78692e-08	0.0845442	0.0813497
Student's T-test Difference Cluster 1 tumors_Cluster 2 tumors	Reactome pathway	NoRC negatively regulates rRNA expression	43	-0.507743	9.01197e-09	4.35278e-07	-0.357747	-0.337008
Student's T-test Difference Cluster 1 tumors_Cluster 2 tumors	WikiPathway	WP_TUMOR_SUPPRESSOR_ACTIVITY_OF_SMARCB1	18	-0.780536	1.0174e-08	6.02807e-07	-0.550665	-0.612523
Student's T-test Difference Cluster 1 tumors_Cluster 2 tumors	Reactome pathway	Transcriptional regulation by small RNAs	46	-0.488141	1.09897e-08	5.13678e-07	-0.318579	-0.260165
Student's T-test Difference Cluster 1 tumors_Cluster 2 tumors	Reactome pathway	TP53 Regulates Transcription of DNA Repair Genes	51	-0.46144	1.3001e-08	5.88702e-07	-0.308651	-0.299442
Student's T-test Difference Cluster 1 tumors_Cluster 2 tumors	Reactome pathway	Activation of the pre-replicative complex	19	-0.752244	1.4193e-08	6.23201e-07	-0.543033	-0.498534
Student's T-test Difference Cluster 1 tumors_Cluster 2 tumors	Reactome pathway	SUMOylation of RNA binding proteins	37	-0.535657	1.82451e-08	7.77564e-07	-0.345983	-0.263888
Student's T-test Difference Cluster 1 tumors_Cluster 2 tumors	WikiPathway	WP_EBOLA_VIRUS_INFECTION_IN_HOST	82	0.358556	2.27525e-08	1.24439e-06	0.212964	0.123866
Student's T-test Difference Cluster 1 tumors_Cluster 2 tumors	Reactome pathway	Transcriptional regulation of white adipocyte differentiation	46	-0.476349	2.45195e-08	1.01511e-06	-0.298654	-0.352863
Student's T-test Difference Cluster 1 tumors_Cluster 2 tumors	Reactome pathway	Formation of HIV elongation complex in the absence of HIV Tat	41	-0.499753	3.28435e-08	1.32195e-06	-0.326798	-0.303965
Student's T-test Difference Cluster 1 tumors_Cluster 2 tumors	Reactome pathway	Formation of HIV-1 elongation complex containing HIV-1 Tat	40	-0.503786	3.75067e-08	1.46884e-06	-0.329804	-0.311498
Student's T-test Difference Cluster 1 tumors_Cluster 2 tumors	Reactome pathway	SUMOylation of DNA replication proteins	37	-0.523232	3.85603e-08	1.47037e-06	-0.34533	-0.263888
Student's T-test Difference Cluster 1 tumors_Cluster 2 tumors	Hallmark	HALLMARK_ALLOGRAFT_REJECTION	66	0.392086	4.0157e-08	2.00785e-07	0.346269	0.11907
Student's T-test Difference Cluster 1 tumors_Cluster 2 tumors	Hallmark	HALLMARK_FATTY_ACID_METABOLISM	110	0.302681	4.92862e-08	2.24028e-07	0.114371	0.0895358
Student's T-test Difference Cluster 1 tumors_Cluster 2 tumors	Reactome pathway	Meiotic recombination	20	-0.693033	8.32217e-08	3.09201e-06	-0.456341	-0.377092
Student's T-test Difference Cluster 1 tumors_Cluster 2 tumors	Reactome pathway	RUNX1 regulates genes involved in megakaryocyte differentiation and platelet function	32	-0.544632	1.01817e-07	3.68833e-06	-0.40025	-0.395673
Student's T-test Difference Cluster 1 tumors_Cluster 2 tumors	Hallmark	HALLMARK_ADIPOGENESIS	128	0.27329	1.12771e-07	4.6988e-07	0.090527	0.0596216
Student's T-test Difference Cluster 1 tumors_Cluster 2 tumors	Reactome pathway	Golgi Associated Vesicle Biogenesis	48	0.44299	1.17795e-07	4.16304e-06	0.150391	0.165504
Student's T-test Difference Cluster 1 tumors_Cluster 2 tumors	Reactome pathway	Activation of ATR in response to replication stress	24	-0.625189	1.18861e-07	4.10071e-06	-0.462148	-0.456183
Student's T-test Difference Cluster 1 tumors_Cluster 2 tumors	Reactome pathway	Tat-mediated elongation of the HIV-1 transcript	38	-0.496451	1.25311e-07	4.2227e-06	-0.327227	-0.311498
Student's T-test Difference Cluster 1 tumors_Cluster 2 tumors	WikiPathway	WP_TYROBP_CAUSAL_NETWORK_IN_MICROGLIA	22	0.648622	1.43586e-07	7.29212e-06	0.387826	0.34337
Student's T-test Difference Cluster 1 tumors_Cluster 2 tumors	Reactome pathway	Regulation of TP53 Activity through Phosphorylation	51	-0.426712	1.45536e-07	4.79276e-06	-0.296232	-0.311701
Student's T-test Difference Cluster 1 tumors_Cluster 2 tumors	Reactome pathway	RNA Polymerase III Abortive And Retractive Initiation	24	-0.619867	1.51964e-07	4.89323e-06	-0.435065	-0.344794
Student's T-test Difference Cluster 1 tumors_Cluster 2 tumors	WikiPathway	WP_DNA_IRDAMAGE_AND_CELLULAR_RESPONSE_VIA_ATR	45	-0.451207	1.74189e-07	8.25655e-06	-0.319833	-0.359204
Student's T-test Difference Cluster 1 tumors_Cluster 2 tumors	Reactome pathway	tRNA processing in the nucleus	48	-0.436391	1.80887e-07	5.69795e-06	-0.272157	-0.260165
Student's T-test Difference Cluster 1 tumors_Cluster 2 tumors	Reactome pathway	Generic Transcription Pathway	22	-0.640228	2.07462e-07	6.39601e-06	-0.425188	-0.394599
Student's T-test Difference Cluster 1 tumors_Cluster 2 tumors	Chromosome	15	202	0.213777	2.16946e-07	5.64058e-06	0.050574	0.0539664
Student's T-test Difference Cluster 1 tumors_Cluster 2 tumors	Reactome pathway	Pausing and recovery of HIV elongation	30	-0.547433	2.19905e-07	6.63839e-06	-0.36101	-0.349312
Student's T-test Difference Cluster 1 tumors_Cluster 2 tumors	Reactome pathway	HIV elongation arrest and recovery	30	-0.547433	2.19905e-07	6.50292e-06	-0.36101	-0.349312
Student's T-test Difference Cluster 1 tumors_Cluster 2 tumors	Reactome pathway	Transcriptional Regulation by E2F6	22	-0.637705	2.3153e-07	6.70973e-06	-0.458585	-0.414294
Student's T-test Difference Cluster 1 tumors_Cluster 2 tumors	Reactome pathway	Condensation of Prophase Chromosomes	16	-0.746515	2.39664e-07	6.80929e-06	-0.523421	-0.559146
Student's T-test Difference Cluster 1 tumors_Cluster 2 tumors	Reactome pathway	Removal of licensing factors from origins	11	-0.899836	2.40897e-07	6.71269e-06	-0.681783	-0.732409
Student's T-test Difference Cluster 1 tumors_Cluster 2 tumors	Reactome pathway	Assembly of the pre-replicative complex	11	-0.899836	2.40897e-07	6.58603e-06	-0.681783	-0.732409
Student's T-test Difference Cluster 1 tumors_Cluster 2 tumors	Reactome pathway	PPARA activates gene expression	59	-0.389786	2.42945e-07	6.51903e-06	-0.252554	-0.325757
Student's T-test Difference Cluster 1 tumors_Cluster 2 tumors	Reactome pathway	Pausing and recovery of Tat-mediated HIV elongation	29	-0.554679	2.43815e-07	6.30871e-06	-0.366337	-0.35085
Student's T-test Difference Cluster 1 tumors_Cluster 2 tumors	Reactome pathway	Tat-mediated HIV elongation arrest and recovery	29	-0.554679	2.43815e-07	6.42341e-06	-0.366337	-0.35085
Student's T-test Difference Cluster 1 tumors_Cluster 2 tumors	WikiPathway	WP_DNA_MISMATCH_REPAIR	18	-0.700232	2.76924e-07	1.23058e-05	-0.443829	-0.426523
Student's T-test Difference Cluster 1 tumors_Cluster 2 tumors	Reactome pathway	Processing of DNA double-strand break ends	40	-0.467174	3.35477e-07	8.52817e-06	-0.312404	-0.33204
Student's T-test Difference Cluster 1 tumors_Cluster 2 tumors	Reactome pathway	Mitotic Prometaphase	67	-0.360685	3.61455e-07	9.03015e-06	-0.265073	-0.249106
Student's T-test Difference Cluster 1 tumors_Cluster 2 tumors	Reactome pathway	DNA methylation	11	-0.884428	3.85038e-07	9.45627e-06	-0.71503	-0.695538
Student's T-test Difference Cluster 1 tumors_Cluster 2 tumors	WikiPathway	WP_NUCLEOTIDE_EXCISION_REPAIR_IN_XERODERMA_PIGMENTOSUM	44	-0.441055	4.40176e-07	1.84097e-05	-0.288077	-0.287743
Student's T-test Difference Cluster 1 tumors_Cluster 2 tumors	Reactome pathway	PCNA-Dependent Long Patch Base Excision Repair	17	-0.707102	4.58062e-07	1.10622e-05	-0.445037	-0.435366
Student's T-test Difference Cluster 1 tumors_Cluster 2 tumors	WikiPathway	WP_EFFECT_OF_PROGERIN_ON_GENES_INVOLVED_IN_HUTCHINSONGILFORD_PROGERIA_SYNDROME	16	-0.72878	4.58562e-07	1.81132e-05	-0.58233	-0.626381
Student's T-test Difference Cluster 1 tumors_Cluster 2 tumors	Hallmark	HALLMARK_TNFA_SIGNALING_VIA_NFKB	49	0.413833	5.75819e-07	2.21469e-06	0.240628	0.204333
Student's T-test Difference Cluster 1 tumors_Cluster 2 tumors	Reactome pathway	HDR through Homologous Recombination (HRR)	21	-0.626699	6.8244e-07	1.62107e-05	-0.373929	-0.352293
Student's T-test Difference Cluster 1 tumors_Cluster 2 tumors	WikiPathway	WP_GENES_RELATED_TO_PRIMARY_CILIUM_DEVELOPMENT_BASED_ON_CRISPR	46	-0.420536	8.51184e-07	3.18522e-05	-0.289057	-0.237894
Student's T-test Difference Cluster 1 tumors_Cluster 2 tumors	Reactome pathway	Gap-filling DNA repair synthesis and ligation in GG-NER	17	-0.685049	1.03001e-06	2.40724e-05	-0.415352	-0.433481
Student's T-test Difference Cluster 1 tumors_Cluster 2 tumors	Reactome pathway	Separation of Sister Chromatids	130	-0.249728	1.03709e-06	2.38532e-05	-0.178177	-0.188726
Student's T-test Difference Cluster 1 tumors_Cluster 2 tumors	Reactome pathway	Activated PKN1 stimulates transcription of AR (androgen receptor) regulated genes KLK2 and KLK3	11	-0.84563	1.21285e-06	2.74597e-05	-0.593259	-0.635788
Student's T-test Difference Cluster 1 tumors_Cluster 2 tumors	Reactome pathway	COPII (Coat Protein 2) Mediated Vesicle Transport	51	0.393728	1.22427e-06	2.72917e-05	0.116821	0.12474
Student's T-test Difference Cluster 1 tumors_Cluster 2 tumors	Reactome pathway	Formation of the Early Elongation Complex	31	-0.50285	1.31151e-06	2.87937e-05	-0.320952	-0.303965
Student's T-test Difference Cluster 1 tumors_Cluster 2 tumors	Reactome pathway	Formation of the HIV-1 Early Elongation Complex	31	-0.50285	1.31151e-06	2.83639e-05	-0.320952	-0.303965
Student's T-test Difference Cluster 1 tumors_Cluster 2 tumors	Reactome pathway	Intra-Golgi traffic	30	0.508966	1.45321e-06	3.09661e-05	0.15843	0.182653
Student's T-test Difference Cluster 1 tumors_Cluster 2 tumors	Reactome pathway	Amplification of signal from unattached kinetochores via a MAD2 inhibitory signal	58	-0.366771	1.45573e-06	3.05704e-05	-0.266788	-0.25528
Student's T-test Difference Cluster 1 tumors_Cluster 2 tumors	Reactome pathway	PRC2 methylates histones and DNA	15	-0.717766	1.51452e-06	3.13507e-05	-0.566967	-0.659888
Student's T-test Difference Cluster 1 tumors_Cluster 2 tumors	Reactome pathway	Transcription of the HIV genome	38	-0.451295	1.54896e-06	2.91486e-05	-0.287103	-0.277832
Student's T-test Difference Cluster 1 tumors_Cluster 2 tumors	Reactome pathway	RNA Polymerase II Transcription Initiation	38	-0.451295	1.54896e-06	3.11728e-05	-0.287103	-0.277832
Student's T-test Difference Cluster 1 tumors_Cluster 2 tumors	Reactome pathway	RNA Polymerase II HIV Promoter Escape	38	-0.451295	1.54896e-06	3.16119e-05	-0.287103	-0.277832
Student's T-test Difference Cluster 1 tumors_Cluster 2 tumors	Reactome pathway	RNA Polymerase II Transcription Pre-Initiation And Promoter Opening	38	-0.451295	1.54896e-06	2.99259e-05	-0.287103	-0.277832
Student's T-test Difference Cluster 1 tumors_Cluster 2 tumors	Reactome pathway	HIV Transcription Initiation	38	-0.451295	1.54896e-06	2.95321e-05	-0.287103	-0.277832
Student's T-test Difference Cluster 1 tumors_Cluster 2 tumors	Reactome pathway	RNA Polymerase II Promoter Escape	38	-0.451295	1.54896e-06	3.07458e-05	-0.287103	-0.277832
Student's T-test Difference Cluster 1 tumors_Cluster 2 tumors	Reactome pathway	RNA Polymerase II Transcription Initiation And Promoter Clearance	38	-0.451295	1.54896e-06	3.03303e-05	-0.287103	-0.277832
Student's T-test Difference Cluster 1 tumors_Cluster 2 tumors	Reactome pathway	RAB geranylgeranylation	42	0.423401	2.16086e-06	4.01421e-05	0.151429	0.12188
Student's T-test Difference Cluster 1 tumors_Cluster 2 tumors	WikiPathway	WP_CIRCADIAN_RHYTHM_GENES	71	-0.326153	2.19024e-06	7.78631e-05	-0.269382	-0.341223
Student's T-test Difference Cluster 1 tumors_Cluster 2 tumors	Chromosome	11	425	0.136868	2.21039e-06	3.83135e-05	-0.00149573	0.00495118
Student's T-test Difference Cluster 1 tumors_Cluster 2 tumors	Reactome pathway	Abortive elongation of HIV-1 transcript in the absence of Tat	22	-0.582549	2.30437e-06	4.22662e-05	-0.36994	-0.349312
Student's T-test Difference Cluster 1 tumors_Cluster 2 tumors	Reactome pathway	Oxidative Stress Induced Senescence	39	-0.437009	2.43869e-06	4.41708e-05	-0.338161	-0.314289
Student's T-test Difference Cluster 1 tumors_Cluster 2 tumors	Reactome pathway	Recruitment and ATM-mediated phosphorylation of repair and signaling proteins at DNA double strand breaks	30	-0.495841	2.68787e-06	4.8083e-05	-0.32196	-0.333257
Student's T-test Difference Cluster 1 tumors_Cluster 2 tumors	Reactome pathway	Deposition of new CENPA-containing nucleosomes at the centromere	16	-0.676744	2.82961e-06	5.00013e-05	-0.467306	-0.514355
Student's T-test Difference Cluster 1 tumors_Cluster 2 tumors	Reactome pathway	FGFR2 alternative splicing	25	-0.541561	2.85243e-06	4.97972e-05	-0.350502	-0.340312
Student's T-test Difference Cluster 1 tumors_Cluster 2 tumors	Hallmark	HALLMARK_DNA_REPAIR	112	-0.257473	2.86069e-06	1.02167e-05	-0.206582	-0.249894
Student's T-test Difference Cluster 1 tumors_Cluster 2 tumors	Reactome pathway	COPI-mediated anterograde transport	77	0.3096	2.88684e-06	4.97979e-05	0.0642312	0.113184
Student's T-test Difference Cluster 1 tumors_Cluster 2 tumors	Reactome pathway	Nonhomologous End-Joining (NHEJ)	28	-0.510131	3.07798e-06	5.24706e-05	-0.331839	-0.341222
Student's T-test Difference Cluster 1 tumors_Cluster 2 tumors	Reactome pathway	Unwinding of DNA	8	-0.947296	3.5224e-06	5.93484e-05	-0.7564	-0.765808
Student's T-test Difference Cluster 1 tumors_Cluster 2 tumors	Reactome pathway	Clathrin-mediated endocytosis	79	0.3026	3.63445e-06	6.05324e-05	0.0683354	0.0873944
Student's T-test Difference Cluster 1 tumors_Cluster 2 tumors	Reactome pathway	Transcription-Coupled Nucleotide Excision Repair (TC-NER)	36	-0.445949	3.80172e-06	6.25988e-05	-0.28664	-0.300434
Student's T-test Difference Cluster 1 tumors_Cluster 2 tumors	Reactome pathway	Intraflagellar transport	35	-0.447825	4.72138e-06	7.68683e-05	-0.316626	-0.267205
Student's T-test Difference Cluster 1 tumors_Cluster 2 tumors	Reactome pathway	RNA Polymerase I Transcription Initiation	37	-0.435416	4.76938e-06	7.6787e-05	-0.314499	-0.267101
Student's T-test Difference Cluster 1 tumors_Cluster 2 tumors	Reactome pathway	Viral Messenger RNA Synthesis	36	-0.436848	5.96529e-06	9.49857e-05	-0.267011	-0.254227
Student's T-test Difference Cluster 1 tumors_Cluster 2 tumors	Reactome pathway	DNA Damage/Telomere Stress Induced Senescence	18	-0.616943	5.97383e-06	9.40879e-05	-0.418441	-0.349207
Student's T-test Difference Cluster 1 tumors_Cluster 2 tumors	Reactome pathway	Transport of Mature mRNA Derived from an Intronless Transcript	35	-0.442531	6.10578e-06	9.51321e-05	-0.268703	-0.249106
Student's T-test Difference Cluster 1 tumors_Cluster 2 tumors	Reactome pathway	Formation of TC-NER Pre-Incision Complex	45	-0.390547	6.11067e-06	9.41954e-05	-0.257361	-0.268271
Student's T-test Difference Cluster 1 tumors_Cluster 2 tumors	Reactome pathway	Dual Incision in GG-NER	32	-0.462354	6.20661e-06	9.46671e-05	-0.295148	-0.298876
Student's T-test Difference Cluster 1 tumors_Cluster 2 tumors	Reactome pathway	Recognition of DNA damage by PCNA-containing replication complex	21	-0.568897	6.53678e-06	9.86645e-05	-0.352542	-0.348147
Student's T-test Difference Cluster 1 tumors_Cluster 2 tumors	Reactome pathway	RAB GEFs exchange GTP for GDP on RABs	60	0.337197	6.67373e-06	9.96932e-05	0.0789065	0.0752902
Student's T-test Difference Cluster 1 tumors_Cluster 2 tumors	Reactome pathway	G2/M DNA damage checkpoint	34	-0.445347	7.24662e-06	0.000107146	-0.297975	-0.341222
Student's T-test Difference Cluster 1 tumors_Cluster 2 tumors	WikiPathway	WP_INTEGRINMEDIATED_CELL_ADHESION	62	0.325036	1.02173e-05	0.000345927	0.117118	0.0431076
Student's T-test Difference Cluster 1 tumors_Cluster 2 tumors	Reactome pathway	SIRT1 negatively regulates rRNA expression	11	-0.764108	1.15649e-05	0.000169269	-0.553442	-0.679116
Student's T-test Difference Cluster 1 tumors_Cluster 2 tumors	Chromosome	2	487	-0.118332	1.30449e-05	0.000169584	-0.138768	-0.125299
Student's T-test Difference Cluster 1 tumors_Cluster 2 tumors	Chromosome	5	289	0.150002	1.54249e-05	0.000160419	0.0138786	0.000251909
Student's T-test Difference Cluster 1 tumors_Cluster 2 tumors	Reactome pathway	Hedgehog 'off' state	27	-0.479359	1.66664e-05	0.000241496	-0.349327	-0.329522
Student's T-test Difference Cluster 1 tumors_Cluster 2 tumors	Reactome pathway	B-WICH complex positively regulates rRNA expression	29	-0.460822	1.79587e-05	0.000257645	-0.339415	-0.299442
Student's T-test Difference Cluster 1 tumors_Cluster 2 tumors	WikiPathway	WP_NUCLEOTIDE_EXCISION_REPAIR	37	-0.408065	1.80844e-05	0.000584455	-0.264404	-0.275091
Student's T-test Difference Cluster 1 tumors_Cluster 2 tumors	Reactome pathway	ATF4 activates genes	15	-0.63814	1.90467e-05	0.000270576	-0.415893	-0.458542
Student's T-test Difference Cluster 1 tumors_Cluster 2 tumors	Reactome pathway	Regulation of TP53 Activity through Acetylation	19	-0.565682	2.00277e-05	0.000281749	-0.402889	-0.425706
Student's T-test Difference Cluster 1 tumors_Cluster 2 tumors	Reactome pathway	Meiotic synapsis	23	-0.513176	2.08767e-05	0.000290868	-0.363652	-0.324149
Student's T-test Difference Cluster 1 tumors_Cluster 2 tumors	WikiPathway	WP_GLYCOSYLATION_AND_RELATED_CONGENITAL_DEFECTS	21	0.536622	2.11418e-05	0.000653558	0.235618	0.187135
Student's T-test Difference Cluster 1 tumors_Cluster 2 tumors	Reactome pathway	mRNA Capping	27	-0.473197	2.13692e-05	0.000294896	-0.2928	-0.301426
Student's T-test Difference Cluster 1 tumors_Cluster 2 tumors	WikiPathway	WP_MEASLES_VIRUS_INFECTION	71	0.290863	2.41399e-05	0.000715144	0.0954225	0.0793188
Student's T-test Difference Cluster 1 tumors_Cluster 2 tumors	Reactome pathway	Regulation of PTEN gene transcription	43	-0.372236	2.50637e-05	0.000342616	-0.318497	-0.363582
Student's T-test Difference Cluster 1 tumors_Cluster 2 tumors	Reactome pathway	Transport of the SLBP Dependant Mature mRNA	29	-0.451725	2.62008e-05	0.000354813	-0.276651	-0.249106
Student's T-test Difference Cluster 1 tumors_Cluster 2 tumors	Reactome pathway	Formation of Senescence-Associated Heterochromatin Foci (SAHF)	11	-0.731834	2.66453e-05	0.000357491	-0.686401	-0.480256
Student's T-test Difference Cluster 1 tumors_Cluster 2 tumors	Reactome pathway	RNA Polymerase III Transcription Initiation From Type 2 Promoter	17	-0.58796	2.74838e-05	0.000365358	-0.402017	-0.334743
Student's T-test Difference Cluster 1 tumors_Cluster 2 tumors	Reactome pathway	RNA Polymerase III Transcription Initiation From Type 1 Promoter	17	-0.58796	2.74838e-05	0.000362037	-0.402017	-0.334743
Student's T-test Difference Cluster 1 tumors_Cluster 2 tumors	WikiPathway	WP_MITOCHONDRIAL_COMPLEX_IV_ASSEMBLY	22	0.516488	2.8026e-05	0.000797059	0.216909	0.221561
Student's T-test Difference Cluster 1 tumors_Cluster 2 tumors	Reactome pathway	Mismatch repair (MMR) directed by MSH2:MSH6 (MutSalpha)	12	-0.697301	2.91707e-05	0.000380795	-0.451881	-0.412768
Student's T-test Difference Cluster 1 tumors_Cluster 2 tumors	Reactome pathway	snRNP Assembly	45	-0.358885	3.24045e-05	0.000419233	-0.244035	-0.228289
Student's T-test Difference Cluster 1 tumors_Cluster 2 tumors	Reactome pathway	Endosomal/Vacuolar pathway	9	0.800201	3.25376e-05	0.00041723	1.14267	1.23409
Student's T-test Difference Cluster 1 tumors_Cluster 2 tumors	Reactome pathway	RHO GTPases Activate Formins	86	-0.260252	3.27139e-05	0.000415811	-0.215412	-0.227315
Student's T-test Difference Cluster 1 tumors_Cluster 2 tumors	Reactome pathway	HDMs demethylate histones	17	-0.574891	4.12872e-05	0.000520219	-0.371305	-0.403915
Student's T-test Difference Cluster 1 tumors_Cluster 2 tumors	Chromosome	19	411	-0.120218	4.26254e-05	0.00036942	-0.147426	-0.138757
Student's T-test Difference Cluster 1 tumors_Cluster 2 tumors	Chromosome	MT	11	0.712183	4.3585e-05	0.000323774	0.307178	0.255174
Student's T-test Difference Cluster 1 tumors_Cluster 2 tumors	Reactome pathway	Switching of origins to a post-replicative state	6	-0.962882	4.44427e-05	0.000555151	-0.797008	-0.792225
Student's T-test Difference Cluster 1 tumors_Cluster 2 tumors	Reactome pathway	NOTCH1 Intracellular Domain Regulates Transcription	21	-0.513529	4.7119e-05	0.000583551	-0.337202	-0.348147
Student's T-test Difference Cluster 1 tumors_Cluster 2 tumors	Reactome pathway	RNA Polymerase I Chain Elongation	30	-0.429847	4.72809e-05	0.000580593	-0.321367	-0.255336
Student's T-test Difference Cluster 1 tumors_Cluster 2 tumors	WikiPathway	WP_BARDETBIEDL_SYNDROME	35	-0.397809	4.79033e-05	0.00130997	-0.282589	-0.309333
Student's T-test Difference Cluster 1 tumors_Cluster 2 tumors	Chromosome	20	197	-0.169455	4.91326e-05	0.000319362	-0.168342	-0.153552
Student's T-test Difference Cluster 1 tumors_Cluster 2 tumors	WikiPathway	WP_TYPE_II_INTERFERON_SIGNALING	15	0.605332	4.99296e-05	0.00131481	0.597343	0.426634
Student's T-test Difference Cluster 1 tumors_Cluster 2 tumors	Reactome pathway	ER-Phagosome pathway	67	0.285953	5.48451e-05	0.00066782	0.258804	0.0494791
Student's T-test Difference Cluster 1 tumors_Cluster 2 tumors	WikiPathway	WP_CHEMOKINE_SIGNALING_PATHWAY	65	0.290114	5.53735e-05	0.00140609	0.077531	0.064208
Student's T-test Difference Cluster 1 tumors_Cluster 2 tumors	WikiPathway	WP_INFLAMMATORY_RESPONSE_PATHWAY	12	-0.668393	6.16094e-05	0.00151049	-0.548076	-0.6037
Student's T-test Difference Cluster 1 tumors_Cluster 2 tumors	Reactome pathway	Transport of the SLBP independent Mature mRNA	28	-0.438003	6.1788e-05	0.00074609	-0.267742	-0.246814
Student's T-test Difference Cluster 1 tumors_Cluster 2 tumors	Reactome pathway	Formation of Incision Complex in GG-NER	37	-0.380365	6.43427e-05	0.000770517	-0.247359	-0.255897
Student's T-test Difference Cluster 1 tumors_Cluster 2 tumors	WikiPathway	WP_EUKARYOTIC_TRANSCRIPTION_INITIATION	35	-0.390699	6.5251e-05	0.00154645	-0.257841	-0.256222
Student's T-test Difference Cluster 1 tumors_Cluster 2 tumors	Reactome pathway	O-linked glycosylation of mucins	9	0.768802	6.55451e-05	0.000778482	0.353547	0.304073
Student's T-test Difference Cluster 1 tumors_Cluster 2 tumors	Reactome pathway	Mismatch repair (MMR) directed by MSH2:MSH3 (MutSbeta)	12	-0.665694	6.59667e-05	0.00077712	-0.410275	-0.382588
Student's T-test Difference Cluster 1 tumors_Cluster 2 tumors	Reactome pathway	Polymerase switching	12	-0.66567	6.60073e-05	0.000765156	-0.413546	-0.436657
Student's T-test Difference Cluster 1 tumors_Cluster 2 tumors	Reactome pathway	Polymerase switching on the C-strand of the telomere	12	-0.66567	6.60073e-05	0.000771327	-0.413546	-0.436657
Student's T-test Difference Cluster 1 tumors_Cluster 2 tumors	Reactome pathway	Vpr-mediated nuclear import of PICs	27	-0.443459	6.80546e-05	0.000782628	-0.286842	-0.249106
Student's T-test Difference Cluster 1 tumors_Cluster 2 tumors	Reactome pathway	RNA Pol II CTD phosphorylation and interaction with CE during HIV infection	25	-0.459784	7.05867e-05	0.000805356	-0.285921	-0.301426
Student's T-test Difference Cluster 1 tumors_Cluster 2 tumors	Reactome pathway	RNA Pol II CTD phosphorylation and interaction with CE	25	-0.459784	7.05867e-05	0.000799064	-0.285921	-0.301426
Student's T-test Difference Cluster 1 tumors_Cluster 2 tumors	Hallmark	HALLMARK_BILE_ACID_METABOLISM	49	0.328177	7.35735e-05	0.000245245	0.0944139	0.123983
Student's T-test Difference Cluster 1 tumors_Cluster 2 tumors	Reactome pathway	Lysosome Vesicle Biogenesis	29	0.425644	7.44929e-05	0.000836746	0.157989	0.213868
Student's T-test Difference Cluster 1 tumors_Cluster 2 tumors	Reactome pathway	EPH-ephrin mediated repulsion of cells	24	0.465427	8.07766e-05	0.000900348	0.165371	0.133854
Student's T-test Difference Cluster 1 tumors_Cluster 2 tumors	WikiPathway	WP_LTF_DANGER_SIGNAL_RESPONSE_PATHWAY	8	0.80511	8.09289e-05	0.00185614	0.454925	0.497794
Student's T-test Difference Cluster 1 tumors_Cluster 2 tumors	Hallmark	HALLMARK_HYPOXIA	89	0.242798	8.10503e-05	0.000253282	0.0567783	0.0793188
Student's T-test Difference Cluster 1 tumors_Cluster 2 tumors	Reactome pathway	KSRP (KHSRP) binds and destabilizes mRNA	13	-0.626316	9.33128e-05	0.00103214	-0.413171	-0.49852
Student's T-test Difference Cluster 1 tumors_Cluster 2 tumors	Reactome pathway	Tristetraprolin (TTP, ZFP36) binds and destabilizes mRNA	14	-0.602552	9.59095e-05	0.00105283	-0.381455	-0.374451
Student's T-test Difference Cluster 1 tumors_Cluster 2 tumors	Reactome pathway	E2F-enabled inhibition of pre-replication complex formation	7	-0.843149	0.000112674	0.00122755	-0.57564	-0.514406
Student's T-test Difference Cluster 1 tumors_Cluster 2 tumors	Reactome pathway	Packaging Of Telomere Ends	10	-0.70296	0.000119481	0.001292	-0.487146	-0.569551
Student's T-test Difference Cluster 1 tumors_Cluster 2 tumors	Reactome pathway	SLBP Dependent Processing of Replication-Dependent Histone Pre-mRNAs	8	-0.783824	0.000124333	0.00133451	-0.500858	-0.502425
Student's T-test Difference Cluster 1 tumors_Cluster 2 tumors	Reactome pathway	RHO GTPases Activate WASPs and WAVEs	28	0.419203	0.000126108	0.00134361	0.127219	0.12644
Student's T-test Difference Cluster 1 tumors_Cluster 2 tumors	WikiPathway	WP_NUCLEOTIDEBINDING_OLIGOMERIZATION_DOMAIN_NOD_PATHWAY	23	0.462087	0.000127277	0.00282794	0.250114	0.192848
Student's T-test Difference Cluster 1 tumors_Cluster 2 tumors	WikiPathway	WP_GASTRIC_CANCER_NETWORK_1	13	-0.612422	0.000133088	0.00286745	-0.458299	-0.404845
Student's T-test Difference Cluster 1 tumors_Cluster 2 tumors	WikiPathway	WP_TOLLLIKE_RECEPTOR_SIGNALING_PATHWAY	44	0.332638	0.000139427	0.00291567	0.101029	0.09477
Student's T-test Difference Cluster 1 tumors_Cluster 2 tumors	Reactome pathway	TP53 Regulates Metabolic Genes	59	0.286687	0.000146209	0.0015464	0.0808303	0.0350664
Student's T-test Difference Cluster 1 tumors_Cluster 2 tumors	WikiPathway	WP_IL10_ANTIINFLAMMATORY_SIGNALING_PATHWAY	7	0.827447	0.000150872	0.00306487	0.419814	0.426634
Student's T-test Difference Cluster 1 tumors_Cluster 2 tumors	Reactome pathway	Condensation of Prometaphase Chromosomes	10	-0.691527	0.000153947	0.00161644	-0.479374	-0.544564
Student's T-test Difference Cluster 1 tumors_Cluster 2 tumors	WikiPathway	WP_THYMIC_STROMAL_LYMPHOPOIETIN_TSLP_SIGNALING_PATHWAY	29	0.406249	0.000156229	0.00308551	0.144875	0.131707
Student's T-test Difference Cluster 1 tumors_Cluster 2 tumors	Hallmark	HALLMARK_MTORC1_SIGNALING	142	0.184167	0.00016898	0.000497	0.021862	0.0450417
Student's T-test Difference Cluster 1 tumors_Cluster 2 tumors	Reactome pathway	Deactivation of the beta-catenin transactivating complex	21	-0.47345	0.000175521	0.00182972	-0.313626	-0.346887
Student's T-test Difference Cluster 1 tumors_Cluster 2 tumors	Reactome pathway	Regulation of actin dynamics for phagocytic cup formation	52	0.301462	0.000176342	0.00182514	0.0714881	0.0693367
Student's T-test Difference Cluster 1 tumors_Cluster 2 tumors	Reactome pathway	Processing of Intronless Pre-mRNAs	19	-0.497018	0.000179008	0.00183959	-0.303057	-0.265772
Student's T-test Difference Cluster 1 tumors_Cluster 2 tumors	Reactome pathway	PKMTs methylate histone lysines	28	-0.409197	0.00018225	0.00185972	-0.295893	-0.383894
Student's T-test Difference Cluster 1 tumors_Cluster 2 tumors	Reactome pathway	Butyrate Response Factor 1 (BRF1) binds and destabilizes mRNA	14	-0.57787	0.000183338	0.00185774	-0.371898	-0.374451
Student's T-test Difference Cluster 1 tumors_Cluster 2 tumors	WikiPathway	WP_ENDODERM_DIFFERENTIATION	56	-0.287791	0.000203458	0.0039097	-0.239132	-0.270556
Student's T-test Difference Cluster 1 tumors_Cluster 2 tumors	WikiPathway	WP_PATHWAYS_AFFECTED_IN_ADENOID_CYSTIC_CARCINOMA	31	-0.38554	0.000207803	0.0038881	-0.277851	-0.308656
Student's T-test Difference Cluster 1 tumors_Cluster 2 tumors	Reactome pathway	RNA Polymerase I Promoter Opening	11	-0.644876	0.000214502	0.00215842	-0.480782	-0.615829
Student's T-test Difference Cluster 1 tumors_Cluster 2 tumors	Reactome pathway	Rev-mediated nuclear export of HIV RNA	28	-0.404529	0.000215829	0.0021568	-0.250174	-0.227315
Student's T-test Difference Cluster 1 tumors_Cluster 2 tumors	Reactome pathway	Phosphorylation of CD3 and TCR zeta chains	7	0.805748	0.000224035	0.00222347	1.21636	1.59774
Student's T-test Difference Cluster 1 tumors_Cluster 2 tumors	Reactome pathway	Nef mediated downregulation of MHC class I complex cell surface expression	9	0.71067	0.000224199	0.00220996	0.43879	0.392675
Student's T-test Difference Cluster 1 tumors_Cluster 2 tumors	Reactome pathway	Anchoring of the basal body to the plasma membrane	53	-0.293707	0.000225209	0.00220492	-0.225793	-0.197667
Student's T-test Difference Cluster 1 tumors_Cluster 2 tumors	WikiPathway	WP_FATTY_ACID_BETAOXIDATION	26	0.418326	0.000226657	0.00413214	0.169686	0.111968
Student's T-test Difference Cluster 1 tumors_Cluster 2 tumors	Hallmark	HALLMARK_APOPTOSIS	86	0.230195	0.000238793	0.000663315	0.097279	0.0261113
Student's T-test Difference Cluster 1 tumors_Cluster 2 tumors	Reactome pathway	Circadian Clock	27	-0.407516	0.00025206	0.00245124	-0.278316	-0.35909
Student's T-test Difference Cluster 1 tumors_Cluster 2 tumors	Reactome pathway	Regulation of PLK1 Activity at G2/M Transition	58	-0.277224	0.000271476	0.00262246	-0.216079	-0.197079
Student's T-test Difference Cluster 1 tumors_Cluster 2 tumors	Reactome pathway	NEP/NS2 Interacts with the Cellular Export Machinery	25	-0.42031	0.000280043	0.0026873	-0.258676	-0.244521
Student's T-test Difference Cluster 1 tumors_Cluster 2 tumors	Reactome pathway	LDL clearance	15	0.541662	0.000284144	0.00270871	0.174598	0.138705
Student's T-test Difference Cluster 1 tumors_Cluster 2 tumors	WikiPathway	WP_HISTONE_MODIFICATIONS	18	-0.494427	0.000285343	0.00507197	-0.325208	-0.357087
Student's T-test Difference Cluster 1 tumors_Cluster 2 tumors	Hallmark	HALLMARK_REACTIVE_OXIGEN_SPECIES_PATHWAY	38	0.340545	0.000288199	0.000758418	0.137514	0.0927012
Student's T-test Difference Cluster 1 tumors_Cluster 2 tumors	Reactome pathway	mRNA decay by 3' to 5' exoribonuclease	15	-0.540825	0.000290378	0.00275005	-0.352954	-0.33323
Student's T-test Difference Cluster 1 tumors_Cluster 2 tumors	Reactome pathway	Translesion synthesis by POLK	10	-0.66058	0.000300059	0.00282328	-0.396577	-0.396343
Student's T-test Difference Cluster 1 tumors_Cluster 2 tumors	Reactome pathway	Translesion synthesis by POLI	10	-0.66058	0.000300059	0.00278708	-0.396577	-0.396343
Student's T-test Difference Cluster 1 tumors_Cluster 2 tumors	Reactome pathway	Translesion synthesis by REV1	10	-0.66058	0.000300059	0.00280506	-0.396577	-0.396343
Student's T-test Difference Cluster 1 tumors_Cluster 2 tumors	WikiPathway	WP_TYPE_I_INTERFERON_INDUCTION_AND_SIGNALING_DURING_SARSCOV2_INFECTION	16	0.521329	0.00030928	0.00536337	0.237981	0.131372
Student's T-test Difference Cluster 1 tumors_Cluster 2 tumors	Reactome pathway	AURKA Activation by TPX2	49	-0.29664	0.000339086	0.00312952	-0.228506	-0.198601
Student's T-test Difference Cluster 1 tumors_Cluster 2 tumors	WikiPathway	WP_APOPTOSIS_MODULATION_AND_SIGNALING	49	0.296287	0.00034467	0.00583476	0.0956333	0.0709351
Student's T-test Difference Cluster 1 tumors_Cluster 2 tumors	WikiPathway	WP_IMMUNE_RESPONSE_TO_TUBERCULOSIS	15	0.531816	0.000366125	0.00605384	0.448873	0.397978
Student's T-test Difference Cluster 1 tumors_Cluster 2 tumors	Reactome pathway	SLBP independent Processing of Histone Pre-mRNAs	7	-0.776885	0.000373606	0.0034263	-0.497254	-0.486191
Student's T-test Difference Cluster 1 tumors_Cluster 2 tumors	WikiPathway	WP_FERROPTOSIS	39	0.329563	0.000378881	0.00612237	0.148078	0.0712139
Student's T-test Difference Cluster 1 tumors_Cluster 2 tumors	Reactome pathway	Regulation of lipid metabolism by Peroxisome proliferator-activated receptor alpha (PPARalpha)	13	-0.569729	0.000378945	0.00345341	-0.352098	-0.405795
Student's T-test Difference Cluster 1 tumors_Cluster 2 tumors	Reactome pathway	HDR through MMEJ (alt-NHEJ)	9	-0.684326	0.000380466	0.0034456	-0.423649	-0.443563
Student's T-test Difference Cluster 1 tumors_Cluster 2 tumors	Reactome pathway	Metal sequestration by antimicrobial proteins	6	0.837147	0.000385371	0.00346834	0.49469	0.334915
Student's T-test Difference Cluster 1 tumors_Cluster 2 tumors	WikiPathway	WP_HOSTPATHOGEN_INTERACTION_OF_HUMAN_CORONAVIRUSES_INTERFERON_INDUCTION	23	0.426016	0.00041155	0.00650248	0.188711	0.112594
Student's T-test Difference Cluster 1 tumors_Cluster 2 tumors	Reactome pathway	DNA Damage Recognition in GG-NER	31	-0.367089	0.00041271	0.00369146	-0.247018	-0.26878
Student's T-test Difference Cluster 1 tumors_Cluster 2 tumors	WikiPathway	WP_TOLLLIKE_RECEPTOR_SIGNALING_RELATED_TO_MYD88	17	0.491043	0.000461515	0.00713342	0.181819	0.187905
Student's T-test Difference Cluster 1 tumors_Cluster 2 tumors	Reactome pathway	Major pathway of rRNA processing in the nucleolus and cytosol	166	-0.158775	0.000465488	0.00413799	-0.148114	-0.114546
Student's T-test Difference Cluster 1 tumors_Cluster 2 tumors	Reactome pathway	NS1 Mediated Effects on Host Pathways	29	-0.374106	0.000498054	0.00440049	-0.213118	-0.244521
Student's T-test Difference Cluster 1 tumors_Cluster 2 tumors	Reactome pathway	Signaling by FGFR2 IIIa TM	15	-0.519381	0.000501312	0.00440243	-0.316433	-0.340312
Student's T-test Difference Cluster 1 tumors_Cluster 2 tumors	WikiPathway	WP_REGULATION_OF_SISTER_CHROMATID_SEPARATION_AT_THE_METAPHASEANAPHASE_TRANSITION	10	-0.635117	0.000509153	0.00770229	-0.385515	-0.367583
Student's T-test Difference Cluster 1 tumors_Cluster 2 tumors	Reactome pathway	XBP1(S) activates chaperone genes	39	0.321039	0.000535309	0.00467267	0.0826988	0.140193
Student's T-test Difference Cluster 1 tumors_Cluster 2 tumors	Reactome pathway	Translocation of ZAP-70 to Immunological synapse	4	0.998834	0.00054258	0.00470777	1.86388	1.91482
Student's T-test Difference Cluster 1 tumors_Cluster 2 tumors	WikiPathway	WP_CILIOPATHIES	54	-0.2726	0.000548849	0.00812983	-0.217152	-0.182685
Student's T-test Difference Cluster 1 tumors_Cluster 2 tumors	Reactome pathway	Nuclear Pore Complex (NPC) Disassembly	27	-0.384362	0.000556034	0.0047958	-0.253392	-0.228289
Student's T-test Difference Cluster 1 tumors_Cluster 2 tumors	Reactome pathway	Establishment of Sister Chromatid Cohesion	9	-0.66375	0.000568033	0.00487029	-0.403999	-0.420955
Student's T-test Difference Cluster 1 tumors_Cluster 2 tumors	WikiPathway	WP_CHOLESTEROL_METABOLISM_WITH_BLOCH_AND_KANDUTSCHRUSSELL_PATHWAYS	26	0.389124	0.000603822	0.00876158	0.116405	0.182111
Student's T-test Difference Cluster 1 tumors_Cluster 2 tumors	Reactome pathway	Removal of the Flap Intermediate	11	-0.596637	0.000616102	0.00525136	-0.367654	-0.405971
Student's T-test Difference Cluster 1 tumors_Cluster 2 tumors	WikiPathway	WP_VEGFAVEGFR2_SIGNALING	287	0.119129	0.000622773	0.00885584	-0.0226366	-5.51632e-05
Student's T-test Difference Cluster 1 tumors_Cluster 2 tumors	Hallmark	HALLMARK_EPITHELIAL_MESENCHYMAL_TRANSITION	90	-0.20944	0.000629484	0.00157371	-0.225665	-0.278761
Student's T-test Difference Cluster 1 tumors_Cluster 2 tumors	Reactome pathway	SUMOylation of transcription factors	11	-0.595417	0.000632169	0.0053568	-0.407274	-0.416443
Student's T-test Difference Cluster 1 tumors_Cluster 2 tumors	Reactome pathway	SMAD2/SMAD3:SMAD4 heterotrimer regulates transcription	11	-0.595179	0.000635358	0.00535252	-0.374308	-0.311701
Student's T-test Difference Cluster 1 tumors_Cluster 2 tumors	Reactome pathway	Transport of Ribonucleoproteins into the Host Nucleus	25	-0.394353	0.000652678	0.00546665	-0.241846	-0.228289
Student's T-test Difference Cluster 1 tumors_Cluster 2 tumors	Reactome pathway	Interleukin-1 processing	5	0.87782	0.000678069	0.00564668	0.684096	0.586755
Student's T-test Difference Cluster 1 tumors_Cluster 2 tumors	Reactome pathway	Nuclear import of Rev protein	27	-0.376933	0.000710551	0.00588336	-0.23961	-0.226342
Student's T-test Difference Cluster 1 tumors_Cluster 2 tumors	Hallmark	HALLMARK_IL6_JAK_STAT3_SIGNALING	20	0.437111	0.000723098	0.00172166	0.189586	0.118772
Student's T-test Difference Cluster 1 tumors_Cluster 2 tumors	WikiPathway	WP_VITAMIN_D_RECEPTOR_PATHWAY	50	0.276966	0.000726141	0.0101233	0.119617	0.12733
Student's T-test Difference Cluster 1 tumors_Cluster 2 tumors	Reactome pathway	RNA Polymerase III Transcription Initiation From Type 3 Promoter	14	-0.521294	0.000739014	0.00608427	-0.364693	-0.313686
Student's T-test Difference Cluster 1 tumors_Cluster 2 tumors	Reactome pathway	Formation of the cornified envelope	24	0.398242	0.000743444	0.00608616	0.133422	0.107487
Student's T-test Difference Cluster 1 tumors_Cluster 2 tumors	Reactome pathway	Recruitment of NuMA to mitotic centrosomes	62	-0.247105	0.000794889	0.00647076	-0.199442	-0.182791
Student's T-test Difference Cluster 1 tumors_Cluster 2 tumors	Reactome pathway	ECM proteoglycans	37	-0.317914	0.000837329	0.00677815	-0.280369	-0.310723
Student's T-test Difference Cluster 1 tumors_Cluster 2 tumors	Chromosome	22	162	0.153048	0.000856924	0.00495111	0.0220569	0.00133632
Student's T-test Difference Cluster 1 tumors_Cluster 2 tumors	Hallmark	HALLMARK_COMPLEMENT	99	0.194465	0.000878282	0.0019961	0.0703901	0.00300663
Student's T-test Difference Cluster 1 tumors_Cluster 2 tumors	WikiPathway	WP_CILIARY_LANDSCAPE	154	-0.156018	0.000915028	0.0125113	-0.158716	-0.14341
Student's T-test Difference Cluster 1 tumors_Cluster 2 tumors	WikiPathway	WP_MITOCHONDRIAL_LONG_CHAIN_FATTY_ACID_BETAOXIDATION	16	0.478306	0.000933967	0.0125293	0.16428	0.16355
Student's T-test Difference Cluster 1 tumors_Cluster 2 tumors	Reactome pathway	Regulation of Glucokinase by Glucokinase Regulatory Protein	23	-0.39889	0.000940887	0.00757414	-0.244499	-0.228289
Student's T-test Difference Cluster 1 tumors_Cluster 2 tumors	Reactome pathway	Cytosolic sensors of pathogen-associated DNA	15	-0.493306	0.000948609	0.00759411	-0.302746	-0.32793
Student's T-test Difference Cluster 1 tumors_Cluster 2 tumors	Reactome pathway	Association of licensing factors with the pre-replicative complex	6	-0.775057	0.001014	0.00807302	-0.504877	-0.466784
Student's T-test Difference Cluster 1 tumors_Cluster 2 tumors	Reactome pathway	Hyaluronan uptake and degradation	5	0.846051	0.00105547	0.00835721	0.464926	0.385137
Student's T-test Difference Cluster 1 tumors_Cluster 2 tumors	WikiPathway	WP_STING_PATHWAY_IN_KAWASAKILIKE_DISEASE_AND_COVID19	13	0.524994	0.00105571	0.0139002	0.228488	0.204333
Student's T-test Difference Cluster 1 tumors_Cluster 2 tumors	Reactome pathway	Synthesis of PIPs at the plasma membrane	35	0.320141	0.00106844	0.00841399	0.0754774	0.0653865
Student's T-test Difference Cluster 1 tumors_Cluster 2 tumors	Reactome pathway	Cohesin Loading onto Chromatin	10	-0.597083	0.0010841	0.00849114	-0.36379	-0.349465
Student's T-test Difference Cluster 1 tumors_Cluster 2 tumors	Reactome pathway	alpha-linolenic acid (ALA) metabolism	7	0.712536	0.00110103	0.00857742	0.327393	0.318295
Student's T-test Difference Cluster 1 tumors_Cluster 2 tumors	Reactome pathway	Molecules associated with elastic fibres	21	-0.411279	0.00111728	0.00865744	-0.40051	-0.561299
Student's T-test Difference Cluster 1 tumors_Cluster 2 tumors	Reactome pathway	Loss of Nlp from mitotic centrosomes	47	-0.275348	0.00112149	0.00864385	-0.216704	-0.197667
Student's T-test Difference Cluster 1 tumors_Cluster 2 tumors	Reactome pathway	Loss of proteins required for interphase microtubule organization from the centrosome	47	-0.275348	0.00112149	0.00859812	-0.216704	-0.197667
Student's T-test Difference Cluster 1 tumors_Cluster 2 tumors	WikiPathway	WP_COVID19_THROMBOSIS_AND_ANTICOAGULATION	6	-0.76398	0.00119681	0.0154714	-0.533118	-0.581232
Student's T-test Difference Cluster 1 tumors_Cluster 2 tumors	Reactome pathway	Extracellular matrix organization	6	-0.763543	0.00120461	0.00918674	-0.593117	-0.577143
Student's T-test Difference Cluster 1 tumors_Cluster 2 tumors	WikiPathway	WP_RANKLRANK_SIGNALING_PATHWAY	42	0.28914	0.00121467	0.015422	0.103167	0.0861211
Student's T-test Difference Cluster 1 tumors_Cluster 2 tumors	WikiPathway	WP_MESODERMAL_COMMITMENT_PATHWAY	50	-0.264955	0.00122517	0.0152824	-0.292163	-0.205219
Student's T-test Difference Cluster 1 tumors_Cluster 2 tumors	WikiPathway	WP_PROLACTIN_SIGNALING_PATHWAY	50	0.264586	0.00124465	0.0152577	0.0571405	0.0321516
Student's T-test Difference Cluster 1 tumors_Cluster 2 tumors	WikiPathway	WP_ARRHYTHMOGENIC_RIGHT_VENTRICULAR_CARDIOMYOPATHY	32	0.330203	0.00124862	0.015047	0.0801286	0.0962218
Student's T-test Difference Cluster 1 tumors_Cluster 2 tumors	Reactome pathway	Presynaptic phase of homologous DNA pairing and strand exchange	19	-0.427432	0.0012715	0.00964606	-0.276807	-0.327743
Student's T-test Difference Cluster 1 tumors_Cluster 2 tumors	WikiPathway	WP_EBSTEINBARR_VIRUS_LMP1_SIGNALING	15	0.480755	0.00127635	0.0151248	0.230831	0.316436
Student's T-test Difference Cluster 1 tumors_Cluster 2 tumors	WikiPathway	WP_REGULATION_OF_ACTIN_CYTOSKELETON	79	0.210326	0.00128629	0.0149926	0.0333491	0.00823072
Student's T-test Difference Cluster 1 tumors_Cluster 2 tumors	WikiPathway	WP_MIRNA_ROLE_IN_IMMUNE_RESPONSE_IN_SEPSIS	21	0.405005	0.00132976	0.0152494	0.193216	0.192848
Student's T-test Difference Cluster 1 tumors_Cluster 2 tumors	Hallmark	HALLMARK_P53_PATHWAY	85	0.201926	0.0013542	0.0029439	0.0722467	0.0360719
Student's T-test Difference Cluster 1 tumors_Cluster 2 tumors	Reactome pathway	Collagen chain trimerization	12	-0.533285	0.0013902	0.0104916	-0.383702	-0.366391
Student's T-test Difference Cluster 1 tumors_Cluster 2 tumors	WikiPathway	WP_SMC1SMC3_ROLE_IN_DNA_DAMAGE_CORNELIA_DE_LANGE_SYNDROME	9	-0.614756	0.00141271	0.0159434	-0.372326	-0.352293
Student's T-test Difference Cluster 1 tumors_Cluster 2 tumors	Reactome pathway	Cytosolic tRNA aminoacylation	24	0.376066	0.00144649	0.01086	0.102749	0.100327
Student's T-test Difference Cluster 1 tumors_Cluster 2 tumors	Reactome pathway	WNT5A-dependent internalization of FZD2, FZD5 and ROR2	9	0.613331	0.00144935	0.0108253	0.221736	0.145375
Student's T-test Difference Cluster 1 tumors_Cluster 2 tumors	Reactome pathway	CDC6 association with the ORC:origin complex	5	-0.822617	0.00144959	0.0107166	-0.543513	-0.480787
Student's T-test Difference Cluster 1 tumors_Cluster 2 tumors	Reactome pathway	Assembly of the ORC complex at the origin of replication	5	-0.822617	0.00144959	0.0107715	-0.543513	-0.480787
Student's T-test Difference Cluster 1 tumors_Cluster 2 tumors	Reactome pathway	POLB-Dependent Long Patch Base Excision Repair	8	-0.650313	0.00145363	0.010692	-0.46068	-0.512139
Student's T-test Difference Cluster 1 tumors_Cluster 2 tumors	Hallmark	HALLMARK_PEROXISOME	68	0.223666	0.00148038	0.00308412	0.0740527	0.0604433
Student's T-test Difference Cluster 1 tumors_Cluster 2 tumors	Reactome pathway	Glycogen breakdown (glycogenolysis)	12	0.529808	0.00149405	0.0109337	0.209082	0.165128
Student's T-test Difference Cluster 1 tumors_Cluster 2 tumors	Reactome pathway	RNA Polymerase III Transcription Termination	16	-0.458291	0.00151811	0.011054	-0.289764	-0.284859
Student's T-test Difference Cluster 1 tumors_Cluster 2 tumors	Reactome pathway	RORA activates gene expression	14	-0.489379	0.00153453	0.0111177	-0.315502	-0.39635
Student's T-test Difference Cluster 1 tumors_Cluster 2 tumors	WikiPathway	WP_HEMATOPOIETIC_STEM_CELL_GENE_REGULATION_BY_GABP_ALPHABETA_COMPLEX	15	-0.471765	0.00157225	0.0174667	-0.384924	-0.290878
Student's T-test Difference Cluster 1 tumors_Cluster 2 tumors	Reactome pathway	Removal of the Flap Intermediate from the C-strand	8	-0.645466	0.00157741	0.0113715	-0.386328	-0.382588
Student's T-test Difference Cluster 1 tumors_Cluster 2 tumors	Chromosome	X	217	0.125333	0.00165137	0.00858715	-0.0097194	0.00315299
Student's T-test Difference Cluster 1 tumors_Cluster 2 tumors	WikiPathway	WP_PROSTAGLANDIN_SIGNALING	5	0.811892	0.00167187	0.0182876	0.545696	0.586755
Student's T-test Difference Cluster 1 tumors_Cluster 2 tumors	WikiPathway	WP_CHOLESTASIS	4	0.903686	0.0017521	0.0188749	0.549243	0.598192
Student's T-test Difference Cluster 1 tumors_Cluster 2 tumors	WikiPathway	WP_MACROPHAGE_MARKERS	5	0.806704	0.00179027	0.0189983	0.785015	0.644567
Student's T-test Difference Cluster 1 tumors_Cluster 2 tumors	Reactome pathway	HDR through Single Strand Annealing (SSA)	22	-0.382921	0.00189863	0.0136194	-0.254029	-0.288
Student's T-test Difference Cluster 1 tumors_Cluster 2 tumors	WikiPathway	WP_MITOCHONDRIAL_COMPLEX_III_ASSEMBLY	15	0.463475	0.00189981	0.0198642	0.218714	0.390235
Student's T-test Difference Cluster 1 tumors_Cluster 2 tumors	WikiPathway	WP_MIRNA_TARGETS_IN_ECM_AND_MEMBRANE_RECEPTORS	16	-0.4478	0.00194434	0.0200352	-0.33963	-0.299398
Student's T-test Difference Cluster 1 tumors_Cluster 2 tumors	WikiPathway	WP_MECP2_AND_ASSOCIATED_RETT_SYNDROME	30	-0.326576	0.00199368	0.0202501	-0.225501	-0.345285
Student's T-test Difference Cluster 1 tumors_Cluster 2 tumors	Reactome pathway	Processive synthesis on the lagging strand	8	-0.630522	0.00202263	0.0144374	-0.397102	-0.435714
Student's T-test Difference Cluster 1 tumors_Cluster 2 tumors	Reactome pathway	Synthesis of UDP-N-acetyl-glucosamine	7	0.672886	0.00205783	0.0146167	0.251053	0.195607
Student's T-test Difference Cluster 1 tumors_Cluster 2 tumors	Reactome pathway	YAP1- and WWTR1 (TAZ)-stimulated gene expression	12	-0.513445	0.00208567	0.0146706	-0.320558	-0.376555
Student's T-test Difference Cluster 1 tumors_Cluster 2 tumors	Reactome pathway	RUNX3 regulates YAP1-mediated transcription	12	-0.513445	0.00208567	0.0147421	-0.320558	-0.376555
Student's T-test Difference Cluster 1 tumors_Cluster 2 tumors	Reactome pathway	2-LTR circle formation	6	-0.722732	0.00217866	0.0152506	-0.510153	-0.462318
Student's T-test Difference Cluster 1 tumors_Cluster 2 tumors	Reactome pathway	MicroRNA (miRNA) biogenesis	21	-0.384736	0.00229715	0.0160028	-0.263581	-0.299442
Student's T-test Difference Cluster 1 tumors_Cluster 2 tumors	Reactome pathway	Immunoregulatory interactions between a Lymphoid and a non-Lymphoid cell	22	0.374726	0.00237217	0.0164463	0.447912	0.232914
Student's T-test Difference Cluster 1 tumors_Cluster 2 tumors	WikiPathway	WP_GENES_ASSOCIATED_WITH_THE_DEVELOPMENT_OF_RHEUMATOID_ARTHRITIS	4	0.875419	0.00243393	0.0243736	0.816277	0.573912
Student's T-test Difference Cluster 1 tumors_Cluster 2 tumors	Reactome pathway	DDX58/IFIH1-mediated induction of interferon-alpha/beta	9	0.583811	0.00243452	0.0167982	0.337223	0.368051
Student's T-test Difference Cluster 1 tumors_Cluster 2 tumors	Reactome pathway	APEX1-Independent Resolution of AP Sites via the Single Nucleotide Replacement Pathway	5	-0.779131	0.00255927	0.0175752	-0.487939	-0.518759
Student's T-test Difference Cluster 1 tumors_Cluster 2 tumors	Reactome pathway	Kinesins	33	-0.302995	0.00263589	0.0180161	-0.249652	-0.202225
Student's T-test Difference Cluster 1 tumors_Cluster 2 tumors	Reactome pathway	Recruitment of mitotic centrosome proteins and complexes	54	-0.236835	0.0026793	0.0182268	-0.196631	-0.174336
Student's T-test Difference Cluster 1 tumors_Cluster 2 tumors	Reactome pathway	Common Pathway of Fibrin Clot Formation	11	-0.521057	0.00278406	0.018851	-0.365828	-0.360283
Student's T-test Difference Cluster 1 tumors_Cluster 2 tumors	Reactome pathway	rRNA modification in the nucleus and cytosol	58	-0.22761	0.00279479	0.0188356	-0.168071	-0.153807
Student's T-test Difference Cluster 1 tumors_Cluster 2 tumors	WikiPathway	WP_AGERAGE_PATHWAY	45	0.25778	0.00283495	0.0279951	0.0342987	0.0540953
Student's T-test Difference Cluster 1 tumors_Cluster 2 tumors	Reactome pathway	Regulation of APC/C activators between G1/S and early anaphase	15	-0.445009	0.00286624	0.0192277	-0.322485	-0.219791
Student's T-test Difference Cluster 1 tumors_Cluster 2 tumors	WikiPathway	WP_CHOLESTEROL_BIOSYNTHESIS_PATHWAY	13	0.477408	0.00289785	0.0282242	0.158155	0.192152
Student's T-test Difference Cluster 1 tumors_Cluster 2 tumors	WikiPathway	WP_DNA_IRDOUBLE_STRAND_BREAKS_AND_CELLULAR_RESPONSE_VIA_ATM	34	-0.295392	0.00292322	0.0280866	-0.227909	-0.195322
Student's T-test Difference Cluster 1 tumors_Cluster 2 tumors	WikiPathway	WP_MAMMALIAN_DISORDER_OF_SEXUAL_DEVELOPMENT	6	-0.701404	0.00293669	0.0278398	-0.659592	-0.538877
Student's T-test Difference Cluster 1 tumors_Cluster 2 tumors	Reactome pathway	Regulation of TP53 Activity through Methylation	9	-0.572729	0.00294116	0.0196394	-0.360161	-0.342574
Student's T-test Difference Cluster 1 tumors_Cluster 2 tumors	Hallmark	HALLMARK_CHOLESTEROL_HOMEOSTASIS	44	0.258924	0.00302639	0.00605277	0.0660676	0.137995
Student's T-test Difference Cluster 1 tumors_Cluster 2 tumors	WikiPathway	WP_IL1_AND_MEGAKARYOCYTES_IN_OBESITY	10	0.540849	0.00307662	0.0287825	0.365807	0.334509
Student's T-test Difference Cluster 1 tumors_Cluster 2 tumors	WikiPathway	WP_IL7_SIGNALING_PATHWAY	16	0.426562	0.00316084	0.0291864	0.132013	0.103543
Student's T-test Difference Cluster 1 tumors_Cluster 2 tumors	WikiPathway	WP_DEREGULATION_OF_RAB_AND_RAB_EFFECTOR_GENES_IN_BLADDER_CANCER	7	0.640733	0.00334089	0.0304535	0.295115	0.20879
Student's T-test Difference Cluster 1 tumors_Cluster 2 tumors	Reactome pathway	Rho GTPase cycle	70	0.203283	0.00338326	0.0224878	0.0446494	0.0439447
Student's T-test Difference Cluster 1 tumors_Cluster 2 tumors	WikiPathway	WP_EGFEGFR_SIGNALING_PATHWAY	108	0.163993	0.00340767	0.0306691	-0.00306565	0.0100564
Student's T-test Difference Cluster 1 tumors_Cluster 2 tumors	Reactome pathway	VEGFA-VEGFR2 Pathway	39	0.270996	0.0034699	0.0229584	0.0639063	0.064208
Student's T-test Difference Cluster 1 tumors_Cluster 2 tumors	Reactome pathway	NF-kB is activated and signals survival	8	0.596916	0.00347384	0.02288	0.35455	0.413776
Student's T-test Difference Cluster 1 tumors_Cluster 2 tumors	Reactome pathway	Cargo recognition for clathrin-mediated endocytosis	62	0.21469	0.00356229	0.0233564	0.0351486	0.0305324
Student's T-test Difference Cluster 1 tumors_Cluster 2 tumors	WikiPathway	WP_NCRNAS_INVOLVED_IN_STAT3_SIGNALING_IN_HEPATOCELLULAR_CARCINOMA	4	0.837899	0.00371369	0.0330054	0.403885	0.3801
Student's T-test Difference Cluster 1 tumors_Cluster 2 tumors	WikiPathway	WP_MIR5093P_ALTERATION_OF_YAP1ECM_AXIS	8	-0.589773	0.00388452	0.0340975	-0.500227	-0.496256
Student's T-test Difference Cluster 1 tumors_Cluster 2 tumors	Reactome pathway	Defective ST3GAL3 causes MCT12 and EIEE15	4	-0.833236	0.00390961	0.0254037	-0.630756	-0.568867
Student's T-test Difference Cluster 1 tumors_Cluster 2 tumors	Reactome pathway	Defective CHST6 causes MCDC1	4	-0.833236	0.00390961	0.0255182	-0.630756	-0.568867
Student's T-test Difference Cluster 1 tumors_Cluster 2 tumors	Reactome pathway	Regulated proteolysis of p75NTR	7	0.629071	0.00396306	0.0256361	0.249511	0.210686
Student's T-test Difference Cluster 1 tumors_Cluster 2 tumors	Reactome pathway	N-Glycan antennae elongation	4	0.831998	0.00396321	0.0255231	0.508121	0.552212
Student's T-test Difference Cluster 1 tumors_Cluster 2 tumors	WikiPathway	WP_INSULIN_SIGNALING	93	0.17357	0.00398581	0.0345599	0.012537	0.00823072
Student's T-test Difference Cluster 1 tumors_Cluster 2 tumors	WikiPathway	WP_IL9_SIGNALING_PATHWAY	13	0.459631	0.00413775	0.0354451	0.147911	0.131707
Student's T-test Difference Cluster 1 tumors_Cluster 2 tumors	WikiPathway	WP_ESTROGEN_METABOLISM_WP697	5	0.740251	0.00416054	0.035216	0.55278	0.289297
Student's T-test Difference Cluster 1 tumors_Cluster 2 tumors	Reactome pathway	Transcriptional regulation of pluripotent stem cells	15	-0.426815	0.00423879	0.027177	-0.300889	-0.309951
Student's T-test Difference Cluster 1 tumors_Cluster 2 tumors	Reactome pathway	PD-1 signaling	7	0.62399	0.00426568	0.027229	1.05054	1.59774
Student's T-test Difference Cluster 1 tumors_Cluster 2 tumors	WikiPathway	WP_MICROGLIA_PATHOGEN_PHAGOCYTOSIS_PATHWAY	22	0.351763	0.00433158	0.0362324	0.157052	0.104093
Student's T-test Difference Cluster 1 tumors_Cluster 2 tumors	Hallmark	HALLMARK_ESTROGEN_RESPONSE_LATE	96	0.169171	0.00436389	0.00839209	0.0231966	0.05155
Student's T-test Difference Cluster 1 tumors_Cluster 2 tumors	Reactome pathway	APC-Cdc20 mediated degradation of Nek2A	16	-0.411363	0.00442056	0.0280938	-0.276423	-0.224255
Student's T-test Difference Cluster 1 tumors_Cluster 2 tumors	WikiPathway	WP_DISORDERS_IN_KETOLYSIS	5	0.734188	0.00447954	0.0370343	0.27037	0.271186
Student's T-test Difference Cluster 1 tumors_Cluster 2 tumors	WikiPathway	WP_CHOLESTEROL_SYNTHESIS_DISORDERS	15	0.422553	0.00463638	0.0378904	0.1311	0.192152
Student's T-test Difference Cluster 1 tumors_Cluster 2 tumors	Reactome pathway	Interleukin-27 signaling	5	0.731099	0.00465049	0.0292981	0.31865	0.397978
Student's T-test Difference Cluster 1 tumors_Cluster 2 tumors	Reactome pathway	Interleukin-35 Signalling	5	0.731099	0.00465049	0.029426	0.31865	0.397978
Student's T-test Difference Cluster 1 tumors_Cluster 2 tumors	WikiPathway	WP_HOMOLOGOUS_RECOMBINATION	7	-0.617576	0.00467755	0.0377924	-0.367392	-0.352293
Student's T-test Difference Cluster 1 tumors_Cluster 2 tumors	Reactome pathway	Processive synthesis on the C-strand of the telomere	5	-0.729233	0.00475654	0.0298365	-0.44465	-0.433481
Student's T-test Difference Cluster 1 tumors_Cluster 2 tumors	Hallmark	HALLMARK_APICAL_JUNCTION	105	0.160234	0.0047748	0.00884223	0.00345332	0.0163104
Student's T-test Difference Cluster 1 tumors_Cluster 2 tumors	WikiPathway	WP_NOCGMPPKG_MEDIATED_NEUROPROTECTION	16	0.407586	0.0047972	0.0383237	0.16737	0.059545
Student's T-test Difference Cluster 1 tumors_Cluster 2 tumors	Reactome pathway	Citric acid cycle (TCA cycle)	18	0.38343	0.00489715	0.0305861	0.122385	0.0964114
Student's T-test Difference Cluster 1 tumors_Cluster 2 tumors	Reactome pathway	APC/C:Cdc20 mediated degradation of Cyclin B	15	-0.419556	0.00493588	0.0306956	-0.299264	-0.219791
Student's T-test Difference Cluster 1 tumors_Cluster 2 tumors	Reactome pathway	Interleukin-10 signaling	6	0.662731	0.00494957	0.0306492	0.467752	0.333282
Student's T-test Difference Cluster 1 tumors_Cluster 2 tumors	Reactome pathway	Senescence-Associated Secretory Phenotype (SASP)	35	-0.274941	0.00495541	0.0305549	-0.242612	-0.228718
Student's T-test Difference Cluster 1 tumors_Cluster 2 tumors	WikiPathway	WP_NOVEL_INTRACELLULAR_COMPONENTS_OF_RIGILIKE_RECEPTOR_PATHWAY	32	0.286997	0.0050282	0.0397228	0.0958766	0.111581
Student's T-test Difference Cluster 1 tumors_Cluster 2 tumors	Reactome pathway	E3 ubiquitin ligases ubiquitinate target proteins	32	-0.285872	0.00520237	0.0319417	-0.182245	-0.307282
Student's T-test Difference Cluster 1 tumors_Cluster 2 tumors	Reactome pathway	Phenylalanine and tyrosine catabolism	6	0.658213	0.0052523	0.0321122	0.519125	0.412116
Student's T-test Difference Cluster 1 tumors_Cluster 2 tumors	Reactome pathway	Growth hormone receptor signaling	11	0.485282	0.00534792	0.0325594	0.173603	0.189806
Student's T-test Difference Cluster 1 tumors_Cluster 2 tumors	WikiPathway	WP_PHOTODYNAMIC_THERAPYINDUCED_NFKB_SURVIVAL_SIGNALING	10	0.508444	0.00539201	0.0421288	0.225318	0.203571
Student's T-test Difference Cluster 1 tumors_Cluster 2 tumors	Reactome pathway	Displacement of DNA glycosylase by APEX1	5	-0.717458	0.00547804	0.0332121	-0.500884	-0.346836
Student's T-test Difference Cluster 1 tumors_Cluster 2 tumors	WikiPathway	WP_SARSCOV2_INNATE_IMMUNITY_EVASION_AND_CELLSPECIFIC_IMMUNE_RESPONSE	27	0.308989	0.0055164	0.0426322	0.130041	0.110569
Student's T-test Difference Cluster 1 tumors_Cluster 2 tumors	Reactome pathway	Synthesis of GDP-mannose	4	0.79914	0.00565235	0.0341261	0.363002	0.35979
Student's T-test Difference Cluster 1 tumors_Cluster 2 tumors	WikiPathway	WP_TH17_CELL_DIFFERENTIATION_PATHWAY	20	0.357763	0.00565788	0.0432554	0.106535	0.0833592
Student's T-test Difference Cluster 1 tumors_Cluster 2 tumors	Reactome pathway	MyD88:Mal cascade initiated on plasma membrane	8	0.565061	0.0056678	0.0340774	0.297892	0.25217
Student's T-test Difference Cluster 1 tumors_Cluster 2 tumors	WikiPathway	WP_TCA_CYCLE_NUTRIENT_USE_AND_INVASIVENESS_OF_OVARIAN_CANCER	5	0.713844	0.00571852	0.0432539	0.284806	0.277698
Student's T-test Difference Cluster 1 tumors_Cluster 2 tumors	WikiPathway	WP_ANDROGEN_RECEPTOR_SIGNALING_PATHWAY	60	-0.206763	0.00575074	0.0430397	-0.18177	-0.243588
Student's T-test Difference Cluster 1 tumors_Cluster 2 tumors	Reactome pathway	Heme degradation	4	0.797246	0.00576713	0.0345313	0.445436	0.514798
Student's T-test Difference Cluster 1 tumors_Cluster 2 tumors	Reactome pathway	Cholesterol biosynthesis	18	0.374718	0.00596329	0.0355589	0.103111	0.15998
Student's T-test Difference Cluster 1 tumors_Cluster 2 tumors	Reactome pathway	Downregulation of SMAD2/3:SMAD4 transcriptional activity	12	-0.457452	0.00610453	0.0362519	-0.322858	-0.336862
Student's T-test Difference Cluster 1 tumors_Cluster 2 tumors	WikiPathway	WP_DEGRADATION_PATHWAY_OF_SPHINGOLIPIDS_INCLUDING_DISEASES	13	0.43916	0.00614851	0.0455374	0.133989	0.221629
Student's T-test Difference Cluster 1 tumors_Cluster 2 tumors	Reactome pathway	Repression of WNT target genes	6	-0.645776	0.00617394	0.0365145	-0.3945	-0.37618
Student's T-test Difference Cluster 1 tumors_Cluster 2 tumors	Hallmark	HALLMARK_MYC_TARGETS_V2	50	-0.224339	0.00619341	0.0110597	-0.195422	-0.167158
Student's T-test Difference Cluster 1 tumors_Cluster 2 tumors	WikiPathway	WP_ATM_SIGNALING_IN_DEVELOPMENT_AND_DISEASE	30	-0.289074	0.00621528	0.0455574	-0.213768	-0.286965
Student's T-test Difference Cluster 1 tumors_Cluster 2 tumors	WikiPathway	WP_TRYPTOPHAN_METABOLISM	13	0.438576	0.00621696	0.0451047	0.209505	0.260803
Student's T-test Difference Cluster 1 tumors_Cluster 2 tumors	WikiPathway	WP_ACTIVATION_OF_NLRP3_INFLAMMASOME_BY_SARSCOV2	5	0.704459	0.00638806	0.0458779	0.507583	0.586755
Student's T-test Difference Cluster 1 tumors_Cluster 2 tumors	WikiPathway	WP_CANCER_IMMUNOTHERAPY_BY_PD1_BLOCKADE	7	0.592961	0.00661344	0.0470216	0.663399	0.268585
Student's T-test Difference Cluster 1 tumors_Cluster 2 tumors	Reactome pathway	Regulation of TNFR1 signaling	21	0.341597	0.00678954	0.0399921	0.109097	0.0437133
Student's T-test Difference Cluster 1 tumors_Cluster 2 tumors	Reactome pathway	Beta-oxidation of very long chain fatty acids	7	0.590754	0.00681817	0.0399981	0.257886	0.318295
Student's T-test Difference Cluster 1 tumors_Cluster 2 tumors	Reactome pathway	Inactivation of APC/C via direct inhibition of the APC/C complex	15	-0.402899	0.00694268	0.0405643	-0.274071	-0.219791
Student's T-test Difference Cluster 1 tumors_Cluster 2 tumors	Reactome pathway	APC/C:Cdc20 mediated degradation of mitotic proteins	15	-0.402899	0.00694268	0.0404014	-0.274071	-0.219791
Student's T-test Difference Cluster 1 tumors_Cluster 2 tumors	WikiPathway	WP_LNCRNA_IN_CANONICAL_WNT_SIGNALING_AND_COLORECTAL_CANCER	26	-0.306006	0.00699145	0.049217	-0.241479	-0.234327
Student's T-test Difference Cluster 1 tumors_Cluster 2 tumors	WikiPathway	WP_T_CELL_MODULATION_IN_PANCREATIC_CANCER	10	0.492548	0.00702548	0.0489718	0.518665	0.232995
Student's T-test Difference Cluster 1 tumors_Cluster 2 tumors	WikiPathway	WP_APOPTOSIS	47	0.227772	0.0070352	0.0485634	0.0599495	0.0260953
Student's T-test Difference Cluster 1 tumors_Cluster 2 tumors	Reactome pathway	Cyclin A/B1/B2 associated events during G2/M transition	14	-0.416126	0.00706297	0.0409369	-0.291334	-0.258838
Student's T-test Difference Cluster 1 tumors_Cluster 2 tumors	WikiPathway	WP_ANGIOPOIETINLIKE_PROTEIN_8_REGULATORY_PATHWAY	66	0.192142	0.00713542	0.0487816	0.0259185	0.00701579
Student's T-test Difference Cluster 1 tumors_Cluster 2 tumors	WikiPathway	WP_PROXIMAL_TUBULE_TRANSPORT	16	0.388739	0.00714677	0.0483939	0.115715	0.0865607
Student's T-test Difference Cluster 1 tumors_Cluster 2 tumors	WikiPathway	WP_FGFR3_SIGNALING_IN_CHONDROCYTE_PROLIFERATION_AND_TERMINAL_DIFFERENTIATION	10	0.491206	0.00718188	0.0481728	0.181729	0.189985
Student's T-test Difference Cluster 1 tumors_Cluster 2 tumors	Reactome pathway	Biosynthesis of the N-glycan precursor (dolichol lipid-linked oligosaccharide, LLO) and transfer to a nascent protein	13	0.43072	0.0072075	0.0416082	0.162166	0.143066
Student's T-test Difference Cluster 1 tumors_Cluster 2 tumors	Reactome pathway	Macroautophagy	47	0.226848	0.00726935	0.0417987	0.0251667	0.0152096
Student's T-test Difference Cluster 1 tumors_Cluster 2 tumors	Reactome pathway	Mitotic Prophase	3	-0.891997	0.00746822	0.0427725	-0.636835	-0.59859
Student's T-test Difference Cluster 1 tumors_Cluster 2 tumors	Reactome pathway	WNT5A-dependent internalization of FZD4	11	0.465312	0.00756978	0.0431835	0.151461	0.129003
Student's T-test Difference Cluster 1 tumors_Cluster 2 tumors	WikiPathway	WP_INTRACELLULAR_TRAFFICKING_PROTEINS_INVOLVED_IN_CMT_NEUROPATHY	17	0.374341	0.00758911	0.0499617	0.19202	0.104378
Student's T-test Difference Cluster 1 tumors_Cluster 2 tumors	WikiPathway	WP_METABOLIC_REPROGRAMMING_IN_PANCREATIC_CANCER	35	0.261132	0.00761251	0.0496559	0.0711128	0.0520987
Student's T-test Difference Cluster 1 tumors_Cluster 2 tumors	Reactome pathway	SUMO is transferred from E1 to E2 (UBE2I, UBC9)	6	-0.628868	0.00765993	0.0435264	-0.382696	-0.391318
Student's T-test Difference Cluster 1 tumors_Cluster 2 tumors	Reactome pathway	G0 and Early G1	8	-0.544321	0.00770178	0.0435933	-0.370478	-0.345227
Student's T-test Difference Cluster 1 tumors_Cluster 2 tumors	Reactome pathway	Transcription of E2F targets under negative control by DREAM complex	8	-0.543993	0.00773864	0.0436315	-0.415595	-0.389161
Student's T-test Difference Cluster 1 tumors_Cluster 2 tumors	Reactome pathway	Polo-like kinase mediated events	4	-0.766502	0.00794796	0.044638	-0.536204	-0.502365
Student's T-test Difference Cluster 1 tumors_Cluster 2 tumors	Reactome pathway	Crosslinking of collagen fibrils	6	-0.625662	0.00797549	0.0446196	-0.443975	-0.401547
Student's T-test Difference Cluster 1 tumors_Cluster 2 tumors	Reactome pathway	Amino acid transport across the plasma membrane	4	0.763369	0.00820721	0.0457394	0.446069	0.580154
Student's T-test Difference Cluster 1 tumors_Cluster 2 tumors	Reactome pathway	Thrombin signalling through proteinase activated receptors (PARs)	12	0.4407	0.00824917	0.0457971	0.147919	0.148741
Student's T-test Difference Cluster 1 tumors_Cluster 2 tumors	Reactome pathway	Clathrin derived vesicle budding	7	0.57576	0.00836608	0.0462689	0.208716	0.269399
Student's T-test Difference Cluster 1 tumors_Cluster 2 tumors	Reactome pathway	Activation of E2F1 target genes at G1/S	12	-0.437102	0.00878968	0.0484268	-0.302779	-0.334974
Student's T-test Difference Cluster 1 tumors_Cluster 2 tumors	Reactome pathway	Synaptic adhesion-like molecules	7	0.570887	0.00893295	0.0490297	0.176308	0.14858
Student's T-test Difference Cluster 1 tumors_Cluster 2 tumors	Reactome pathway	Negative regulation of activity of TFAP2 (AP-2) family transcription factors	4	-0.753388	0.0090844	0.0496728	-0.646183	-0.625054
Student's T-test Difference Cluster 1 tumors_Cluster 2 tumors	Hallmark	HALLMARK_IL2_STAT5_SIGNALING	79	0.1601	0.0142732	0.024609	0.0609065	-0.00485902
Student's T-test Difference Cluster 1 tumors_Cluster 2 tumors	Hallmark	HALLMARK_ANGIOGENESIS	14	-0.358425	0.0203235	0.0338726	-0.293355	-0.286192
Student's T-test Difference Cluster 1 tumors_Cluster 2 tumors	Hallmark	HALLMARK_UV_RESPONSE_UP	93	0.137972	0.022093	0.0356339	0.0304341	0.0286092
Student's T-test Difference Cluster 1 tumors_Cluster 2 tumors	Hallmark	HALLMARK_MITOTIC_SPINDLE	150	-0.103691	0.0296072	0.0462612	-0.139977	-0.119818
Student's T-test Difference Cluster 1 tumors_Cluster 2 tumors	Hallmark	HALLMARK_XENOBIOTIC_METABOLISM	98	0.125832	0.0321968	0.0487831	0.0450442	-0.0173933
