# Supplementary material for: Spatial proteomics of ovarian cancer precursors delineates early disease changes and drug targets
Source: Mol Syst Biol. 2025 Nov 13;22(1):7–41. doi: 10.1038/s44320-025-00168-4 (PMC12759074; doi:10.1038/s44320-025-00168-4)
Supplement: Supplementary file 19 — Dataset EV13 [file 44320_2025_168_MOESM19_ESM.xlsx]

## Sheet: Legend
Dataset EV13. ANOVA-significant proteins between NFTE stroma, STIC stroma and Invasive stroma. Relative protein levels (z-scores) and cluster information are shown. Related to figure 5B.

## Sheet: Dataset EV13
W29AW29B_epistroma	W29AW29B_STICstroma	W29AW29B_tumorstroma	W29C_epistroma	W29C_tumorstroma	W29G_epistroma	W29G_STICstroma	W29G_tumorstroma	W29H_epistroma	W29H_STICstroma	W29H_tumorstroma	W31XW31Y_epistroma	W31XW31Y_tumorstroma	W31YW31X_epistroma	W31YW31X_STICstroma	W31YW31X_tumorstroma	W29EW29F_epistroma	W29EW29F_STICstroma	W29EW29F_tumorstroma	W29IW29J_epistroma	W29IW29J_STICstroma	W29IW29J_tumorstroma	W30A_epistroma	W30A_STICstroma	W30A_tumorstroma	W30B_epistroma	W30B_STICstroma	W30B_tumorstroma	W30C_epistroma	W30C_STICstroma	W30C_tumorstroma	W30E_epistroma	W30E_STICstroma	W30E_tumorstroma	W30GW30H_epistroma	W30GW30H_STICstroma	W30GW30H_tumorstroma	W30L_epistroma	W30L_STICstroma	W30L_tumorstroma	W30M_epistroma	W30M_STICstroma	W30M_tumorstroma	W30V_epistroma	W30V_STICstroma	W30V_tumorstroma	W30DW30F_STICstroma	W30DW30F_tumorstroma	W30JW30K_epistroma	W30JW30K_STICstroma
2.4683	2.99177	2.50018	2.17599	-2.14083	2.71464	2.78938	1.60738	1.91399	2.66133	1.9153	1.67889	0.666066	1.6919	-0.10562	-2.61079	2.91979	2.4398	1.29016	-2.45365	1.95077	2.04913	2.77752	2.29158	2.3622	2.64234	2.637	3.02575	3.22783	2.35999	2.71989	2.70255	3.52467	2.5197	1.22816	2.21865	-2.27003	2.64672	1.60804	2.55551	2.21278	2.30087	-3.00809	2.72996	2.02889	-3.10553	2.27901	-2.77625	2.09963	1.95878
-0.164826	-0.739619	0.801745	0.76846	-0.42516	0.404334	0.37668	-0.350182	-1.24325	-1.25273	-1.80279	-0.6932	-1.40134	-1.99978	-2.99589	-3.24035	-0.633481	-1.21181	-1.66956	-1.25684	-1.06732	0.230674	0.0640793	-0.465389	-0.669724	-1.10405	-1.09793	-1.24312	-0.419168	-1.17071	-0.724347	-0.423763	0.521873	-0.729323	-1.76915	-1.22861	-1.70965	-1.04289	-2.13494	-1.86123	-1.1762	-2.19369	-2.26726	0.182894	0.505908	-1.06133	-2.72197	-2.8508	-0.958503	-1.97861
1.68412	-0.202028	1.1326	2.61225	0.991513	2.4901	3.2369	2.29122	1.68309	1.87711	0.902135	2.22034	2.04195	0.512881	-2.84021	0.138655	3.25589	3.26852	2.22991	1.09978	1.75331	2.49452	2.38306	2.01526	1.54785	2.25602	2.78222	1.62189	3.30135	2.73162	2.53091	2.84511	3.7093	1.31633	1.39959	1.81387	1.2216	2.56471	1.83639	1.99423	2.51233	2.68627	1.74846	3.15748	3.05433	1.32545	0.887325	-0.323014	0.565612	2.30123
-0.327864	0.474584	0.650119	-2.27865	-0.793658	-2.11781	-1.58748	0.201602	-2.31905	-1.38727	-1.57984	-2.32104	-1.60156	-1.30472	-2.28928	0.499538	-2.43976	-3.12295	-1.79019	-2.1373	-2.39407	-1.51416	-1.51205	-1.75898	-2.00428	-3.36485	-2.68107	-1.09017	-1.69667	-1.52807	-0.493108	-2.99248	-1.54248	-0.479909	-2.07787	-0.0465527	-2.81683	-2.76092	-1.22785	-1.5406	0.114767	-1.41494	-2.23436	-2.63682	-1.98137	-3.35473	-0.485382	-1.35185	0.457845	-0.519489
0.398574	0.655553	1.74512	0.580067	0.891809	0.514264	0.879238	0.68477	0.248438	0.435766	0.837009	0.481968	0.213925	0.27458	-0.0598822	0.738339	0.168759	-0.0458779	0.560321	-0.314005	0.435577	0.723268	0.422427	0.569078	0.646091	0.774658	0.864032	1.03197	0.140025	0.510908	0.386181	0.727896	0.664237	1.13511	0.429657	0.225648	0.456238	0.593157	0.794765	0.72074	0.520684	0.555196	0.97274	0.25488	0.279808	0.56226	0.574742	0.778849	0.440817	0.0851951
-0.845424	-1.66969	-1.50984	-0.718389	-1.05624	-0.746807	-1.07208	-1.33868	-0.836666	-1.05209	-1.09297	-0.350221	-2.42525	-3.30866	-0.769325	-1.17377	-0.652273	-0.505365	-2.92258	-0.39119	-0.951762	-1.32513	-0.797386	-0.665958	-0.767155	-0.97023	-0.854347	-1.11292	-3.49067	-1.238	-3.32928	-0.833898	-1.0881	-1.61574	-0.679594	-3.84163	-1.82573	-0.730549	-0.848279	-1.60453	-1.03109	-1.08564	-1.13815	-1.05663	-0.44256	-0.490123	-1.299	-1.32327	-1.67865	-1.9849
-1.36534	-0.707495	-2.91437	-0.88403	-1.17916	-1.49329	-1.67842	-1.06393	-0.448187	-2.13866	-0.749722	-0.608206	-1.66262	-1.03143	-2.10226	-0.457848	-1.16481	-0.573473	-2.63255	-2.14629	-1.80694	-1.53912	-1.29715	-3.28025	-0.757511	-0.478226	-0.92208	-0.549925	-1.0932	-1.39972	-2.1383	-0.0347567	-1.31351	-0.942722	-1.65745	-0.381237	-2.50136	-0.839273	-1.44648	-1.94265	-1.17152	-2.90937	-1.05481	-0.958995	-2.00407	-0.800717	-1.20618	-0.770899	-1.82749	-0.902833
0.080493	-0.214938	0.326047	0.544146	0.163959	0.872828	-0.390382	0.0294394	0.326736	0.0924726	0.91814	0.214138	-0.698367	-0.369443	-0.237147	-0.189861	0.284906	0.617709	-2.28361	0.39366	-0.274259	-0.483883	0.264809	-0.0177975	-0.73389	0.242402	0.166372	-0.0363941	0.291713	0.148335	-1.43582	-0.15451	-0.260056	-0.322392	0.84002	-0.247025	-0.186328	0.234554	0.0155249	-0.452277	-0.464627	-0.156959	0.105693	1.15501	-2.94178	0.54168	0.157237	0.0861073	0.459231	-0.0533175
0.994493	-0.553331	-1.70548	1.69401	0.148744	1.06367	0.913607	-0.69812	0.474239	0.760024	0.112822	0.198911	-0.526302	-0.41096	-0.279696	-1.9768	0.899518	0.724122	-0.961654	1.19982	0.733694	-0.0764618	1.03045	0.944581	0.539067	0.567264	0.435138	-0.358742	0.701651	-0.37494	-0.711723	0.784347	0.764104	0.812953	1.50658	-1.15195	0.892312	1.04294	-0.220087	0.265208	0.535651	-0.228665	-0.810851	0.580164	0.521365	-0.159376	0.616918	-0.495725	-0.58232	-0.280201
-0.0422564	0.118122	-0.151797	-0.189451	-0.113221	-0.249153	-0.310835	0.0610433	-0.299476	-0.254598	-0.221246	-0.0697756	-0.119009	-0.219591	-0.221152	0.142841	-0.189657	-0.405709	-0.257932	-0.478303	-0.26682	-0.0257673	-0.0488844	-0.153605	-0.298547	-0.0449648	0.124924	0.0472345	-0.172654	0.0542946	-0.640568	0.0989866	-0.0773816	-0.147526	-0.108803	-0.411469	0.205985	-0.265592	0.00868702	0.16018	-0.045476	0.0774918	-0.0317869	-0.278233	-0.130208	-0.0977268	-0.024622	-0.0565081	0.0805902	-0.394223
-1.14485	-1.83784	-0.448672	-0.994106	-1.95619	-0.97454	-1.08278	-1.82981	-1.83056	-1.38385	-1.60808	-1.51821	-2.95977	-1.37083	-1.5765	-2.29604	-1.11171	-1.23425	-2.99788	-1.71524	-1.40346	-2.11191	-1.38867	-1.33775	-1.64694	-1.31476	-1.48015	-1.58406	-1.11392	-1.56987	-2.92997	-1.60895	-1.487	-1.61713	-0.651537	-2.26896	-2.28346	-1.23602	-1.4893	-1.8403	-1.58601	-1.51987	-1.49223	-1.27566	-1.16007	-1.34451	-1.82961	-1.42364	-2.20854	-1.64877
-0.703326	-0.394319	-1.46298	-0.200916	-0.431954	-0.285963	-0.372875	-0.251712	-0.349895	0.00488997	-0.156214	-0.341723	-1.10127	-0.510229	-0.123596	-0.729998	-0.26083	-0.155225	-0.619055	-0.0550318	-0.298547	-0.452394	-0.382471	-0.116841	-0.599498	-0.161129	-0.160471	-0.467963	-0.128756	-0.141103	-0.988421	-0.254922	-0.69515	-0.526697	0.0526872	0.860356	-0.191045	-0.418528	-0.178622	-0.265069	-0.502341	-0.310276	-0.28225	-0.356375	-0.147482	-0.013545	-0.356208	-0.511201	0.246853	-0.00951242
-0.322693	-0.166454	-0.426099	-0.512526	-0.164785	-0.543597	-0.354078	-0.139284	0.108277	0.0172153	0.0249033	0.0264568	-0.086607	0.200552	-0.076684	-0.0871668	-0.479234	-0.695887	-0.117743	-0.594545	-0.266812	-0.182854	-0.22969	-0.271725	-0.472876	0.419863	-0.0178623	0.210922	-0.140551	0.043498	0.620662	0.263312	-0.155568	-0.18407	-0.256956	-0.492761	0.131215	-0.282739	-0.49465	-0.0496478	-0.18698	-0.0832596	-0.277639	-0.397475	-0.503777	0.111242	-0.0678215	0.774304	-0.0572395	-0.0715127
-2.93561	-1.13345	-0.636189	-1.91912	-0.0784888	-2.06457	-1.35621	-0.760019	-1.91214	0.0433869	-0.211805	-0.904469	0.159916	-3.28171	0.226392	-0.282743	-2.25243	-3.02767	-0.554768	-2.9515	-2.7585	-2.7785	-2.86373	-2.26921	-0.620643	-3.12243	-1.17828	-0.756518	-2.34258	-1.09112	-2.26744	-1.39625	-2.69494	-0.862172	-1.53636	-0.0647726	-2.18159	-1.15493	-0.854314	-0.388855	-3.77882	-0.589313	-0.262055	0.873359	-3.78107	-1.09933	-0.636294	-0.934983	-2.43193	-1.08263
-0.578466	0.215827	-0.633157	-1.1119	-0.162937	-0.609703	-0.312263	-0.488407	-0.518309	-0.610524	-0.40056	-0.229648	-0.564955	-0.08499	-0.501041	0.0435152	-0.319096	-0.895924	0.0643997	-0.86678	-0.137096	-0.198938	-0.480971	-0.00175381	0.015666	-0.320575	-0.16552	-0.0325432	-0.647216	-0.29602	0.478782	-0.0296345	-0.211637	-0.215111	-0.826965	-0.128983	-0.14012	-0.632801	-0.3735	-0.324721	-0.489179	-0.357694	-0.166385	-0.852844	-1.07794	-0.579022	-0.180465	0.0497599	0.216539	0.11798
0.698264	0.274676	-0.0319085	0.665142	0.163306	0.741154	0.575069	-0.413952	0.135074	0.308098	0.739434	0.790202	-0.0559187	0.462801	0.372605	0.13055	0.948164	0.594755	0.685433	0.0632496	0.272473	0.910707	0.439968	0.190728	0.236343	0.528765	0.58643	0.525618	0.692598	0.513408	-2.64711	0.877575	0.455832	0.892612	0.853541	0.21391	0.904998	0.807243	0.563429	0.371731	0.896683	0.360777	0.507371	0.634657	0.807443	0.677532	0.50252	0.585542	0.61691	0.343331
1.17854	-0.257538	0.205667	0.589182	-0.138419	2.126	1.93335	0.989671	0.597594	0.639234	0.454059	0.55281	0.252944	-0.777524	-0.0208206	0.03438	1.15816	1.5002	-0.741055	3.19738	1.03742	-0.52634	1.46133	1.54135	1.44779	0.453253	0.38131	0.925068	1.85165	0.976306	-0.486281	0.0639496	0.579724	-0.665933	0.654459	-0.221539	0.550959	-0.294857	-0.269474	-0.615333	0.858494	-0.722326	-0.0158949	1.47489	0.60759	-0.328257	0.0562096	-0.199692	-0.248223	-0.480069
-0.780479	-0.335396	1.49856	-0.757106	1.09428	-1.04199	-0.719805	0.291713	-0.967032	-0.657705	0.585718	-0.683133	-0.0632448	-0.646081	-0.650746	0.664383	-0.696745	-0.97385	-1.04907	-0.755869	-1.17969	-1.01826	-0.612654	-0.847955	-0.48394	-0.764997	0.0376263	0.227114	-0.871063	-0.158795	-1.10122	-1.0604	-1.02312	0.0899658	-0.483943	0.32796	-1.30778	-0.559427	0.201057	-0.163847	-0.940914	-0.498192	1.01806	-0.79126	-0.600417	-0.652301	-0.368413	-0.76628	-0.688987	-0.518377
-0.569515	-1.09996	-0.906378	-0.205818	-0.889927	-0.468696	-0.561722	-2.66817	-0.436381	-0.665087	-0.495081	-2.62065	-0.646517	-3.18563	-3.20492	-0.614583	-0.511519	-2.31464	-0.466764	-2.02818	-2.42205	-3.54066	-0.457662	-2.81859	-2.69307	-0.524174	-2.74813	-0.540545	-0.2199	-0.460682	-3.02022	-0.432564	-2.39581	-0.871174	0.264833	-2.61877	-1.03362	-0.111314	-0.879518	-2.63736	-0.327591	-1.87376	-2.48201	-0.506601	-0.306921	-0.201949	-1.11474	-0.267126	-2.7882	-0.394889
-0.176783	0.194804	-0.956035	-0.445713	-0.00326777	-0.199138	-0.307696	0.149524	-0.169006	-0.267647	0.0053606	-0.354115	-0.128133	-0.415863	-0.0592175	0.505163	-0.588611	-0.613499	-0.100467	-0.328384	-0.213085	-0.0446663	-0.395096	-0.00516701	-0.278488	-0.328874	-0.0427742	0.166606	-0.103	0.0954342	-0.57072	-0.163868	-0.0798926	0.206116	-0.121384	-0.443247	0.176522	0.0170646	-0.163707	-0.110774	0.0231628	-0.00414467	0.0935621	-0.602236	0.142606	0.0612555	-0.267259	0.171981	-0.114713	-0.244552
0.803108	-2.80633	-3.63746	0.482123	-0.221405	1.45124	1.21588	-0.75355	0.604639	1.22066	0.319001	0.298944	-0.604051	0.65632	0.977698	-1.4822	0.897906	1.27607	-0.67589	0.282557	0.363645	-3.27351	0.900343	0.579334	0.607034	0.141848	0.102798	-0.999875	1.57981	1.07902	0.108837	0.592067	0.574233	-0.812776	1.33347	-1.34395	-1.17629	1.00296	0.289232	-0.707716	1.02317	1.25303	0.930883	0.665075	1.72539	1.45094	-0.789601	-1.30581	-0.0989456	0.533208
0.0328684	0.938117	1.21604	-0.325624	1.09341	0.334283	0.985311	0.978788	-0.309243	1.52263	0.893499	0.0481443	-0.223866	-0.129135	1.19007	1.5896	-0.493113	-0.47154	1.12972	-0.289875	1.35257	1.77502	0.235818	0.227579	0.642479	-0.0344725	0.323543	0.58401	-0.018322	0.675906	1.58495	-0.344853	0.872857	1.18109	0.359635	1.37148	1.05003	-0.156882	0.588257	1.40735	0.182948	1.43161	0.727083	-0.140272	0.644596	0.6082	0.840049	0.925451	0.925863	0.713632
-0.772215	0.137187	0.382722	-0.944837	-0.222059	-0.714745	-0.762233	-0.0642142	-1.42808	-0.6707	-0.75757	-0.781171	-0.689559	-1.16058	-0.682375	0.37433	-1.21888	-1.13063	-0.529576	-0.665289	-1.47265	-0.730006	-0.635388	-0.686179	-0.74763	-0.60944	-0.610341	-0.0376234	-0.729301	-0.503737	-1.09734	-0.516719	-0.522383	-0.630135	-0.93168	-1.01032	-0.711836	-0.873645	-0.699934	-0.586719	-0.743791	-0.949467	-0.961472	-1.34122	-1.23307	-0.943986	-0.761626	-0.801012	-0.326135	-0.583139
0.116974	0.692203	0.150499	-0.28613	0.61755	-0.0944233	-0.144342	0.303167	-0.129095	-0.0969787	0.486223	-0.0689154	-0.125598	0.0600085	0.297967	0.852261	-0.269979	-0.162881	0.163362	-0.497202	0.0836453	0.0102425	-0.183899	0.241456	0.226585	0.0101709	0.250044	0.379206	-0.0200987	0.443505	-0.516676	0.0878181	0.0695977	0.386417	0.124413	0.306153	0.449862	-0.00488997	0.208117	0.298989	0.442595	0.148133	0.680765	-0.361483	-0.0202794	0.138762	0.278514	0.653736	1.67108	0.464603
-0.835505	0.22872	-0.0352082	-1.16018	0.0279393	-1.2753	-0.696317	0.368034	-1.7295	-0.800475	-0.349779	-1.22418	-1.56848	-1.78206	-1.35689	-0.411555	-0.748425	-1.32198	0.0538635	-1.58797	-0.443797	-0.291484	-1.73676	-0.649708	-0.579954	-1.88853	-0.441009	-0.368328	-1.18707	-0.488068	-0.844928	-2.06481	-1.08534	-0.0945168	-1.03298	-0.0597496	0.337971	-0.875146	-0.466636	-0.0230727	-0.897265	-0.615016	-0.122741	-1.39543	-1.24709	-0.412773	-0.308378	-0.603357	0.0365381	-1.94078
-0.286277	1.46579	1.3462	0.122475	0.191235	-0.296066	0.228566	1.1852	-0.114067	-0.0383687	-0.112348	0.128037	-0.168067	0.176058	0.275096	0.791711	-0.332682	-0.216912	0.784952	-0.492449	0.0772481	0.246145	-0.359074	0.462176	0.21116	0.243815	0.605088	0.759365	-0.22789	0.465833	1.042	0.16117	0.760002	0.71687	-0.138945	1.32312	1.42955	-0.195506	0.957521	0.741384	-0.497504	0.498263	0.349251	-0.303887	-0.314505	0.0811768	0.7652	0.632298	-0.447684	0.477808
4.47088	3.34818	2.539	4.50664	3.969	4.32441	4.5419	3.53094	4.37988	4.32109	4.34735	4.57449	4.07714	4.38827	3.75749	2.55015	4.26719	3.6897	3.08783	4.12765	4.17752	3.75235	4.54356	4.33596	3.91306	4.91626	4.70167	4.60204	3.96234	4.00304	3.45045	4.85465	4.25841	4.32336	4.20691	2.41942	3.30983	4.93063	4.23869	3.69305	4.59741	4.53136	4.3594	4.53829	4.44805	4.92001	4.05047	4.10625	3.58652	3.96187
0.533722	0.969573	3.6552	0.329517	2.7084	0.588588	0.956764	2.21163	0.747436	1.24151	2.0588	0.784668	2.22746	1.09635	1.31416	3.10009	0.0958729	0.443766	1.10316	0.709578	0.947628	0.554395	0.286171	0.834993	1.35993	-0.483302	1.08786	1.85278	0.52788	1.4476	-0.471886	0.238661	0.938542	1.67969	0.748801	0.218328	0.510697	0.856776	1.90477	1.20526	0.373918	1.20784	2.0466	0.276949	0.317905	1.29749	1.2076	0.5483	-0.237832	1.09922
0.318135	0.464679	0.522516	0.112371	0.894955	0.328206	0.201968	0.623885	0.312876	0.328456	0.895321	0.286855	0.332829	0.593316	0.560527	1.19591	0.0989304	0.0128932	0.483938	0.0855207	0.372901	0.31815	0.371607	0.538425	0.436071	0.559923	0.4713	0.682111	0.480957	0.983901	0.622238	0.59244	0.599035	0.669531	0.552683	0.528854	0.521845	0.509256	0.749272	0.792577	0.415609	0.572953	0.535488	0.0668573	0.279355	0.772879	0.450172	0.646922	0.530222	0.801328
1.43331	-2.2035	-3.64731	1.19172	0.533171	0.643393	1.24071	-0.331108	1.31791	0.174505	0.905623	1.49172	0.989629	1.38334	1.06344	-2.62971	0.990537	1.36844	-1.66708	1.15374	0.240365	0.135869	1.0025	0.820964	0.145112	2.23454	1.95099	1.54023	1.38628	1.17092	-0.478781	2.29787	0.634483	1.24356	1.81887	0.827063	-0.0883741	1.45947	1.12218	0.306771	1.03936	0.896761	0.623165	1.34528	1.44125	2.05368	0.582377	0.4393	0.407263	0.933056
0.113942	1.11412	1.08533	-0.275746	1.45564	0.173646	0.692567	1.83992	-0.393964	-0.0956779	0.738363	-0.22345	-0.546353	-0.0931516	0.821291	1.8742	-0.038065	-0.641558	0.661229	-2.50165	0.58778	1.24388	0.24493	0.868645	0.549211	0.62104	0.0797062	0.913786	-0.789705	0.785228	0.69261	-0.279514	1.35124	1.12597	-0.0675416	0.275475	-0.225595	-0.116951	0.594593	1.18781	0.385371	0.991206	1.01913	-1.99503	-0.418972	-0.0840759	0.488818	-0.0609007	-0.0602531	0.443462
0.687542	0.407356	0.962853	0.465544	0.550182	0.763838	0.707373	0.306475	0.565232	0.581246	0.528195	0.373395	0.11538	0.432312	-0.0368366	0.160666	0.280524	0.314764	0.0490999	0.10859	0.326415	0.157315	0.521561	0.598288	0.283718	0.828341	0.836745	0.683522	0.299329	0.662049	-0.396002	0.96672	0.50087	0.723849	0.563827	-0.200388	-0.0836191	0.846741	0.535542	0.066051	0.535685	0.58567	0.597486	0.613824	0.413788	0.722021	0.356501	0.233741	0.507042	0.525728
0.540688	0.728239	0.699838	0.227644	0.473078	0.412805	0.35101	0.619486	0.0332518	0.288434	0.231741	0.473109	0.0381012	0.104392	0.245053	0.62572	0.119194	0.219574	0.265942	0.298981	0.357794	0.44505	0.231362	0.509287	0.396592	0.463589	0.647473	0.597199	0.252705	0.492792	-0.145263	0.413624	0.525159	0.444066	0.41481	0.213663	0.707989	0.313549	0.510363	0.790106	0.645466	0.656202	0.555991	0.355116	0.515231	0.449802	0.609665	0.610997	0.528891	0.236471
-0.928063	-1.65681	-3.3838	-1.1625	-1.41275	-1.06743	-1.23814	-3.13608	-1.03999	-1.20648	-1.74883	-1.09775	-0.915066	-0.515123	-1.21572	-2.28725	-0.979548	-1.05826	-1.74581	-0.77614	-1.25897	-1.69549	-1.43975	-1.28755	-3.04726	-0.723927	-0.783303	-0.91622	-1.09161	-1.02262	-1.94717	-0.69721	-1.65023	-1.58223	-1.0176	-2.79196	-1.42699	-1.28506	-1.51997	-3.0441	-1.16437	-1.10419	-1.08885	-1.1307	-0.550339	-1.00375	-1.00241	-1.33071	-1.72963	-1.88402
1.10894	1.58421	1.68619	0.955179	1.50901	1.09129	1.19362	1.56454	0.856573	1.1202	1.10155	1.18658	0.695265	1.39222	1.04881	1.53262	1.07195	0.896384	1.61566	0.651914	1.21954	1.49246	0.945806	1.25323	1.28657	1.39143	1.46894	1.57738	1.10639	1.51854	1.23539	1.30071	1.53116	1.47071	1.08282	1.05246	1.67775	1.15088	1.54041	1.70649	1.37035	1.54606	1.55281	0.842668	0.80674	1.21956	1.27477	1.19204	1.4959	1.16584
0.794136	1.22905	1.37488	0.620888	1.00657	0.69339	0.739698	1.16763	0.603285	0.689676	0.754726	0.746465	0.553444	0.92694	0.783254	1.08092	0.797567	0.744156	1.23506	0.569448	0.830942	1.09794	0.550602	0.964407	0.957632	0.882483	1.01451	1.08592	0.852632	1.02031	0.781036	0.812726	1.04702	1.12741	0.859635	0.518135	1.32479	0.732386	0.981343	1.1561	0.992653	1.04086	1.07636	0.622024	0.749053	0.879288	1.1211	0.709081	1.09331	0.857296
1.60554	2.05746	0.458443	1.36067	1.91175	1.40204	1.67713	1.96875	1.29482	1.30699	1.94072	1.49785	1.73826	1.91772	1.84375	1.79945	1.43886	1.30886	2.24635	1.13543	2.05356	1.73599	1.41501	1.6188	1.94228	1.69451	1.87674	1.6248	1.6844	1.94298	2.36406	1.76611	2.25256	1.86062	1.55568	0.857534	1.9148	1.53145	1.83122	1.7084	1.2161	1.59912	1.9279	1.07295	1.15784	1.58062	1.95298	2.2231	1.6165	2.13491
0.0802574	0.361832	1.34847	0.678555	1.10442	0.901313	1.03045	0.809227	0.650373	0.704719	0.705777	0.54386	0.0184174	0.0585923	-0.111827	0.649685	-0.0901651	0.126329	0.925323	-0.431496	0.580684	1.26985	0.482378	0.901961	1.10143	0.573743	0.639163	0.978103	0.125265	0.523335	0.267171	0.842118	0.626521	1.23861	0.565781	0.744218	1.0223	0.884158	1.37609	0.854781	0.771558	0.833724	0.843143	0.215796	0.660928	0.566026	0.845981	1.05875	1.10336	0.191567
4.90598	3.45419	2.17432	5.19409	3.46722	5.23169	4.8551	3.15936	4.78958	4.90645	3.87646	5.36381	2.94774	4.0235	4.65646	2.702	4.94141	4.63441	2.64752	4.72066	4.5379	4.18618	4.63483	4.75449	4.58314	5.1803	5.61042	3.61908	4.93804	4.38328	2.15535	5.50691	4.22374	3.81717	5.99802	3.14653	3.26197	5.22229	4.43276	3.54141	4.80799	5.01762	4.80581	4.98413	5.25668	5.4484	4.25341	3.49895	4.53493	4.61338
-1.03554	-1.90437	-3.26197	-1.36816	-1.53279	-1.22577	-1.53686	-1.93727	-1.86094	-1.58542	-1.59697	-1.5019	-2.55827	-1.58597	-1.69957	-1.68949	-2.03432	-1.19571	-1.99732	-1.31854	-1.59689	-2.13486	-1.87394	-1.52191	-1.65557	-2.07722	-1.61129	-1.55004	-1.43878	-1.33816	-2.03531	-1.91242	-1.80215	-1.76217	-1.19725	-2.06972	-1.99083	-1.41329	-1.50099	-1.88093	-1.38596	-1.52249	-1.77181	-1.47697	-1.33006	-1.32143	-1.31002	-1.63286	-1.56705	-1.90508
0.447723	0.734546	0.147673	0.450098	0.360541	0.291251	0.536127	0.308065	-0.12818	0.497124	0.233541	0.469758	-0.151353	0.459768	0.310916	0.0449419	0.135357	0.00841284	1.09101	0.224353	0.61026	1.01031	0.339843	0.59194	0.381301	0.0664368	0.123697	0.570458	0.412244	0.546818	0.937901	0.00135517	0.460174	0.705321	0.423784	0.649053	0.825983	0.368853	0.441318	0.735547	0.464686	0.465264	0.374366	0.140496	0.115654	0.659547	0.677058	0.764359	0.477601	0.22783
4.00681	4.93987	5.839	4.14354	4.99218	4.17978	4.53971	4.77121	4.00197	4.18471	4.54192	4.29579	4.1516	4.08678	3.69247	5.06103	3.73111	3.78974	4.4293	3.10762	4.19466	4.78683	3.9679	4.24028	4.37628	4.50177	4.69284	4.62617	3.82321	4.20993	4.28571	4.55876	4.43711	5.16157	4.00315	3.88831	4.62153	4.42193	4.68805	4.67138	4.45204	4.29922	4.46034	3.9321	4.08413	4.28802	4.57788	4.72741	4.51401	4.30949
2.30191	2.47807	2.27791	1.97224	2.44969	2.08053	2.10642	2.57296	1.70075	2.12681	2.1482	2.24444	1.65733	1.96853	2.14149	2.50686	1.94236	2.01669	2.06559	1.88183	1.88361	2.18634	1.92186	2.24061	1.93744	2.29943	2.39417	2.36069	2.21778	2.4711	1.5094	2.17252	2.11295	2.68785	2.03422	2.00213	2.39466	2.05722	2.33163	2.42944	2.13039	2.30697	2.53814	1.78818	1.82881	2.31389	2.14682	1.95198	2.52203	2.01795
-1.59771	-1.59983	-0.24083	-2.05133	0.0826602	-1.9901	-1.82507	-0.878407	-1.95111	-1.64029	-0.00547218	-0.714063	-0.518654	-1.57854	-1.39662	-0.423096	-1.74048	-1.82747	-1.585	-1.29289	-1.31056	-1.99751	-1.56484	-1.9657	-1.54858	-2.24037	-1.23795	-0.999758	-1.51217	-0.897751	-2.63826	-1.67064	-1.64518	-0.875062	-1.07006	-2.31467	-1.84019	-1.77527	-0.966743	-1.22885	-1.80973	-0.948265	0.122797	-2.26634	-2.39652	-1.56547	-1.1722	-0.989466	-2.61408	-1.29972
-1.33877	-2.45063	-3.52506	-0.96827	-1.73459	-1.25851	-1.12942	-1.95828	-1.52698	-1.49589	-1.49718	-1.28686	-2.86409	-1.3756	-1.3214	-2.78261	-1.49995	-1.67345	-1.28906	-2.20569	-1.60846	-1.91739	-1.09451	-1.69216	-1.83595	-1.62705	-1.87932	-1.49872	-1.04267	-1.70224	-1.13751	-1.66141	-1.22739	-2.05799	-1.00268	-1.75998	-2.35921	-0.903025	-1.63752	-2.43296	-1.16825	-1.68654	-1.94996	-1.78601	-2.51548	-1.59819	-2.04013	-3.06618	-3.45585	-3.05263
0.661263	1.19816	0.0826249	0.647296	1.02543	0.577337	0.646034	1.05253	0.576166	0.536479	0.75308	0.606126	0.0699806	0.681736	0.253603	0.850196	0.482648	0.28316	0.647911	0.0439758	0.433876	0.912282	0.525216	0.788992	0.512008	1.14184	1.06763	1.37714	0.438904	0.533311	0.611543	1.02622	0.723357	1.54667	0.51305	0.655739	1.52944	0.679569	0.817429	1.08816	0.4962	0.546924	0.717721	0.20675	0.147737	0.708982	0.805667	1.15633	0.791417	0.464338
-0.422758	-0.622778	-2.66378	-0.179965	-0.538706	-0.212723	-0.279079	-0.935694	-0.316904	-0.63992	-0.635813	-0.195405	-0.145792	-0.727525	-0.288404	-1.26489	-0.398417	-0.571795	-0.168863	-0.494706	-0.445083	-0.350469	-0.396233	-0.663353	-0.598539	-0.0541334	-0.383784	-0.0425596	-0.459517	-0.720856	-0.152266	0.0196924	-0.863748	-0.646657	-0.469287	-0.451901	-0.864089	0.269826	-0.916926	-0.879269	0.150923	-0.429032	-0.449327	-0.363657	-0.584029	-0.385666	-0.473124	-0.666281	-1.22835	-0.685176
-0.621407	-0.077023	0.238023	-0.489605	0.0194154	-0.615746	-0.552387	-0.381272	-0.849001	-0.662685	-0.149903	-0.36531	-0.336576	-0.479559	-0.471932	-0.16866	-0.749393	-0.551211	-0.137231	-0.912694	-0.55169	-0.402049	-0.688935	-0.421435	-0.571248	-0.483155	-0.419694	-0.174367	-0.536478	-0.416847	-0.372328	-0.492396	-0.282898	0.314374	-0.546177	-0.616811	-0.425323	-0.727708	-0.392108	-0.135501	-0.216732	-0.488132	-0.354727	-0.502062	-0.613101	-0.424612	-0.273215	-0.110562	-0.431606	-0.468541
-2.63951	-3.06771	-0.708771	-2.9855	-0.980246	-2.53067	-1.60626	-0.552121	-2.58308	-2.89696	-1.61137	-1.15118	-0.272881	-2.5371	-2.67636	-0.558263	-3.03321	-1.40969	-3.4128	-2.31067	-2.49491	-3.65405	-3.14283	-3.59989	-1.15928	-1.48773	-3.61752	-0.755828	-4.27959	-0.992526	-2.78052	-2.75506	-2.72876	-1.29513	-1.29485	-3.1531	-3.26819	-1.2489	-0.447499	-1.14164	-3.00866	-1.67817	-1.48909	-1.37481	-3.87597	-3.7867	-2.72006	-1.58009	-4.09607	-2.74176
-0.656929	0.46788	-1.44336	-0.611151	-0.379903	-0.597038	-0.530224	-0.0417275	-1.19233	-1.10504	-0.526919	-0.38976	-1.49217	-0.969327	-0.592971	-0.418235	-0.0381327	-0.760902	0.0545425	-0.628008	-0.580207	-0.178812	-1.12785	-0.339827	-0.857269	-0.440049	-0.304936	0.0621796	-0.394139	-0.434936	-0.628697	-0.190639	-0.36306	-0.333443	-0.91743	-0.878419	0.340941	-0.569527	-0.558579	0.247138	-0.585014	-0.517708	-0.672306	-1.18515	-0.918958	-0.926996	-0.201968	0.199685	-0.649275	-0.624221
-2.34127	1.57286	1.58221	-2.66799	-1.38318	-3.52581	-2.29564	-0.0181184	-2.03924	-2.53941	-2.75176	-0.86074	-2.53622	-1.39044	-2.68185	1.97621	-3.19467	-2.39647	-0.00640488	-2.20272	-2.36611	-0.474541	-2.83532	-2.54613	-2.56064	-1.33422	-1.35029	-0.911829	-2.01063	-0.955432	-0.960791	-2.91478	-1.65762	-1.50687	-2.73895	-1.04945	0.887901	-2.85301	-2.30305	0.451442	-2.21115	-2.8501	-2.6713	-2.78713	-2.09085	-3.48393	-0.644533	1.20842	-0.178212	-1.25425
1.17637	-1.22933	-1.14206	0.727051	-1.27232	0.269691	0.182097	-1.28021	0.0607681	0.100415	-0.955359	1.233	-1.08424	0.131468	0.880413	-1.04526	0.527283	0.804887	-1.42607	0.729344	0.433449	-0.839683	0.546445	0.196669	0.204798	0.551581	0.651953	-0.336409	0.951201	0.343249	-1.74575	0.523969	0.0637431	-0.414926	0.565685	-0.500531	-0.895925	0.307856	0.0438576	-0.556778	0.609384	0.726217	0.124949	0.287051	0.680924	0.569341	0.294994	-0.195837	0.660941	0.160957
0.885879	-0.0245614	-0.0560193	0.445089	0.137629	0.391202	0.575242	-0.187985	0.0494671	0.159085	0.160918	-0.104483	-0.604467	-0.384629	-0.330109	-0.576278	0.337327	0.573392	-0.768118	0.0225306	-0.290205	-0.359088	0.48807	0.00845146	-0.0634413	-0.687652	-0.567399	-0.329392	0.340094	0.29914	-1.1747	0.091423	0.114984	-0.370604	0.35452	-1.34906	-0.831554	0.0913615	0.867867	0.203081	0.200845	1.00013	0.641773	0.171264	0.34115	0.222618	-0.944595	-0.497448	-0.294477	0.183559
0.973562	1.52919	2.00632	0.919552	1.43634	1.1259	1.18522	1.69415	0.98843	0.979421	0.817183	1.08041	0.863562	1.39787	1.11523	1.62755	0.981587	0.678319	1.77977	1.05547	1.40159	1.61828	0.841922	1.45628	1.24841	1.37301	1.54238	1.61185	1.11298	1.60157	1.12386	1.26725	1.71912	1.64073	0.953835	0.77123	1.41898	1.09583	1.59	1.69361	1.51664	1.51248	1.43988	0.733224	1.26756	1.2006	1.4881	1.12414	1.59661	1.54799
0.930007	0.174689	-0.763939	1.00525	0.1819	1.41816	1.24458	0.38338	0.597416	0.450214	0.407455	0.938084	0.180059	0.172128	0.758216	0.259748	0.857031	0.808645	0.256859	0.90442	0.410759	0.242788	0.871268	0.59731	0.776546	1.26936	1.31442	0.927769	0.871262	0.615475	-0.202668	1.16623	0.61059	0.850477	0.909678	-0.0413465	-0.0185366	0.729761	0.797805	-0.080152	0.947023	0.826437	0.935404	0.447024	0.338783	0.383633	0.0887756	-0.0649176	-0.0956049	0.375342
-1.29796	-0.429102	-0.98917	-1.37191	-0.651003	-1.24188	-1.14644	-0.535425	-1.17871	-1.2409	-0.876762	-1.10811	-1.96847	-1.67879	-2.46621	-0.54188	-1.55208	-1.81345	-0.670406	-2.50416	-0.974268	-0.686443	-1.60118	-1.17653	-1.18935	-0.661664	-0.565214	-0.224227	-1.48569	-1.12065	-2.52002	-0.669989	-0.952084	-0.364212	-1.68801	-1.13818	-0.242079	-1.05902	-0.787129	-0.325059	-1.0188	-1.46915	-0.799502	-2.05172	-1.54304	-1.19254	-0.47541	-0.451755	-0.733747	-1.24793
-1.57084	-0.106857	-0.81037	-1.45996	0.221628	-0.273772	-0.608133	-0.607662	-0.562151	-1.48629	-0.833512	-1.21216	-0.345021	-0.71872	-2.71628	-2.86633	-1.27441	-2.62358	-0.22374	-2.72125	-3.26126	1.54118	-1.1587	-1.6018	-0.591215	-0.953341	-0.611431	-0.00571823	-1.10749	0.0272408	-0.474088	-0.584434	-1.57825	-0.178172	-1.10492	-0.249879	1.13715	-0.728992	-1.73201	-0.536296	-0.706335	-0.626103	-1.68738	-1.21514	-1.64938	-0.869035	-0.468485	-1.19372	-1.26439	-1.4853
0.890411	0.872651	1.41625	1.07541	1.68851	1.10907	1.37348	1.36282	1.26819	1.37484	1.89518	1.37722	1.40622	0.941504	1.06773	1.57567	1.08029	0.963754	0.0952711	0.954128	1.08476	0.641582	1.05709	1.02475	0.993052	1.19834	1.08035	1.95696	0.844878	1.82553	1.49677	1.05722	1.42205	1.77244	0.757176	0.281506	0.690886	1.19765	1.71169	1.48094	1.51913	1.29363	1.52157	1.30668	0.968215	1.30357	1.93633	2.23755	1.12573	0.985462
0.344849	0.357109	0.365812	0.00052166	0.235227	0.126958	0.00883102	1.32751	-0.397725	-0.0943694	-0.00879765	0.0908661	-0.582266	0.19326	0.0690031	0.528705	-0.0410318	0.261504	0.238826	0.189811	-0.0534949	0.260408	-0.466957	0.189843	-0.175981	-0.0240402	0.17056	0.14021	0.227438	0.421403	-0.0784898	-0.0116816	0.0258727	0.520535	0.230969	0.410091	0.840296	-0.103955	0.0185041	0.190351	0.31585	0.0970697	0.200617	0.0475502	0.0421329	0.125974	0.457749	0.0890026	0.677709	0.259152
-0.0849276	0.198711	1.71145	0.210181	0.81583	-0.101074	0.0159903	0.48061	-0.148548	0.123666	0.957776	0.294551	1.06563	0.621383	-0.168585	1.34673	-0.00475502	-0.451025	-0.114155	-0.349344	0.53311	0.714892	-0.129233	0.184123	0.448904	0.919075	0.533272	0.740095	-0.0463095	0.257492	0.0316195	0.312581	0.234782	0.625619	-0.370735	0.0372982	0.376132	0.68356	0.92658	0.109337	0.0434952	0.371338	0.200288	-0.392982	-0.524906	0.394502	0.624258	0.608389	-0.540828	0.00771379
-1.38692	-0.832654	-0.765934	-1.91525	-0.85029	-1.8183	-1.59965	-1.32351	-2.70935	-1.44653	-0.914148	-1.20749	-1.208	-3.13771	-0.616246	-0.781154	-2.51697	-2.16103	-1.45154	-1.633	-1.19568	-0.934881	-2.7647	-1.35614	-2.39069	-1.33136	-1.10849	-1.31421	-1.15271	-1.0184	-1.33015	-2.94949	-1.1803	-1.00606	-0.841458	-0.82332	-1.27103	-1.33846	-0.946015	-1.10375	-0.334184	-1.32559	-0.605138	-1.69715	-0.688379	-1.08174	-0.899666	-0.873868	-1.41241	-1.53865
2.0605	3.2083	2.27256	1.91861	2.53961	1.84947	2.04179	3.07453	1.82448	1.76981	2.16758	2.21238	1.65002	2.05204	2.04784	2.67437	1.75403	1.57342	2.65534	1.9262	2.30432	2.51504	1.81529	2.34005	2.11751	2.56649	2.73531	2.78922	1.92988	2.36879	2.03515	2.32794	2.32006	2.51989	1.92114	2.54891	2.73275	2.08079	2.52793	2.96116	2.22397	2.42046	2.5195	1.67308	1.89191	2.41413	2.655	2.96144	2.13339	1.99039
-0.24536	0.670088	-0.376961	0.304436	0.761309	0.428921	1.09242	0.516695	-0.147777	-0.562109	0.0408163	-0.239479	0.28009	-0.309354	-0.254137	0.877058	-0.900925	-0.543604	0.548111	-0.485808	-0.310771	-0.109657	0.0469007	-0.147766	-0.231064	-0.832921	-0.322465	-0.469573	0.289474	0.884348	1.61049	-0.90084	-0.129916	0.746333	0.30497	1.13384	0.314242	0.36835	0.49727	0.179595	0.7716	1.17336	0.283135	-0.376978	-0.108346	-0.275241	-0.106064	-0.446905	-0.158068	1.1907
-0.227927	-0.398491	-1.76293	-0.294769	-1.09191	-0.0826359	-0.283839	-1.96934	-0.716163	-0.5493	-1.22492	-0.394962	-1.28265	-0.934525	-1.36421	-1.87375	-0.293984	0.167965	-1.26356	-0.781438	-0.999383	-0.436346	-0.302613	-0.418493	-0.503845	-0.829618	-0.968007	-0.701456	0.617203	0.178865	-0.744687	-0.629208	-0.607514	-0.860595	-0.456621	-1.43634	-1.14967	-0.326143	-0.238998	-1.24618	0.441955	-0.544448	-0.482313	-0.514075	-0.305498	-0.59584	-0.772179	-0.934136	-1.44162	-0.439945
0.254318	0.638963	0.00916719	0.606773	0.650943	0.492755	0.419967	0.834253	0.752473	0.408569	0.704209	0.558802	0.391734	0.646163	0.139517	0.350489	0.272593	0.10133	0.540033	-0.158961	0.54775	0.475572	0.432477	0.363565	0.2281	0.896727	0.958893	1.11267	0.273666	0.397305	0.540986	0.796786	0.409181	1.17564	0.262426	0.390391	0.731758	0.583282	0.572826	0.858143	0.452738	0.337426	0.531794	0.10492	0.273283	0.706278	0.848367	0.992066	0.703813	0.404004
-1.6526	-1.43516	-2.22439	-0.871107	-2.18183	-0.749262	-1.09445	-3.92995	0.128996	0.761077	-1.53727	0.186664	-3.31583	-0.592436	-3.28819	-2.96951	-1.05832	-2.31492	-1.33218	-0.897555	0.221669	-3.26529	-1.0297	-0.458307	-1.01629	-0.909472	-1.47542	-3.05365	-2.15623	-1.57941	-2.17744	-3.62786	-1.94397	-1.63744	-3.16817	-3.02938	-3.09827	-0.682989	-2.9282	-1.95482	-1.22277	-3.00696	-1.01209	-0.0151644	0.596408	0.00980759	-0.720984	-2.57397	-1.86641	-1.86046
1.57761	-0.258237	-0.327052	1.1634	0.546936	0.86668	1.09643	0.342319	1.35846	1.07089	0.774207	0.966609	1.07026	1.0997	0.686259	-0.342237	0.736044	1.00903	-0.00146866	0.566443	0.960566	0.487005	1.02205	0.813056	0.788368	1.01379	0.837406	1.16287	0.969536	0.85705	0.154699	1.26706	1.14461	0.800204	0.971608	-0.607445	0.3578	1.43206	0.821663	0.436223	1.07102	1.20529	0.82913	1.19116	1.1021	1.27214	0.685397	0.339031	0.903512	0.763581
-0.384945	0.19152	0.0570598	-0.408033	0.713905	-0.515561	-0.127633	0.669437	-0.340635	0.593597	0.577794	-0.144538	0.51926	-0.191525	0.134729	1.20894	-0.482469	-0.385787	0.837918	-0.671913	0.4558	0.507315	0.281164	0.259516	0.357831	-0.450165	0.179392	0.62541	-0.327337	0.575043	1.07831	-0.116029	0.755312	0.807444	-0.394739	0.268993	0.765906	-0.137095	0.595014	1.1892	-0.0629539	0.325967	0.30522	-0.324222	-0.155843	-0.0485487	0.797916	0.607624	-0.447138	0.223446
1.99953	1.9852	2.92896	2.04812	2.435	2.18944	2.37311	1.8213	1.5857	1.99883	1.80421	1.87336	1.52226	1.60959	1.76737	2.0935	1.73238	1.75561	1.67802	1.12556	2.02558	2.27872	1.99049	2.00442	1.9972	1.85524	2.06239	2.14994	1.98605	1.83708	1.78029	2.15935	2.19469	3.0843	2.05893	2.09534	2.79755	2.12295	2.5896	2.89482	1.94529	1.94219	1.78831	1.85638	2.20597	2.30696	2.18468	2.58569	1.7857	2.01748
0.558644	-0.950521	-2.47136	0.0579882	-0.756063	0.279188	0.139005	-0.878538	0.571117	-0.146816	-0.565712	0.157487	-0.154715	-0.276027	-0.152974	-2.0874	0.185977	0.353043	-0.506434	0.235129	-0.460504	-0.561238	0.226583	-0.312889	-0.36665	0.890021	0.663864	-0.168556	-0.0155754	0.0162954	-1.39477	0.999706	-0.121328	-0.987616	-0.387888	-0.682538	-1.22354	-0.130252	-0.0803833	-0.742466	0.146673	0.188525	-0.646502	-0.0609741	0.209308	-0.288919	-1.03816	-0.781544	-1.15525	-0.132432
-1.82729	-1.56612	-1.52672	-3.21077	-1.94222	-2.69148	-2.19415	-1.7774	-1.981	-2.71138	-3.0306	-1.20998	-3.28616	-2.22478	-2.20465	-1.22631	-3.43557	-2.01245	-2.02922	-2.5359	-2.08124	-2.43301	-2.67663	-3.03665	-2.04587	-2.47185	-1.76224	-1.86793	-1.48229	-1.77041	-1.77134	-3.32145	-2.32589	-2.03272	-3.0926	-2.40622	-1.83157	-3.11459	-2.08643	-2.69549	-1.65893	-1.31296	-1.61298	-2.36	-1.85096	-1.48226	-1.90778	-1.73865	-2.12329	-1.46388
-2.40962	-1.89361	-2.16305	-2.31908	-2.18056	-2.29607	-1.93246	-1.55391	-3.66611	-2.54147	-2.02009	-1.95315	-3.09616	-2.23107	-2.7773	-1.78881	-2.67033	-2.35972	-2.41042	-2.47709	-2.47684	-2.18184	-2.57108	-2.3873	-1.41887	-1.84922	-1.68443	-1.80465	-2.83772	-1.82939	-2.03918	-2.09369	-2.04681	-2.15712	-2.49856	-3.06906	-1.72059	-2.26843	-2.31235	-1.72139	-2.09133	-2.17951	-2.2327	-2.82155	-2.85605	-2.77495	-1.76205	-1.82313	-1.68617	-1.73782
-1.55809	-1.02069	-0.854934	-2.61842	-1.19221	-3.11651	-1.02395	-0.721579	-2.63633	-1.46853	-1.28091	-1.04635	-1.0436	-2.40019	-2.74905	-0.929351	-1.452	-1.21141	-1.03067	-1.62159	-1.41707	-1.3671	-2.33632	-0.97427	-0.891304	-1.3389	-1.02689	0.0761843	-2.55246	-0.427876	-0.917865	-1.17505	-1.52928	-1.04772	-1.62674	-1.10997	-0.996289	-1.37819	-1.13449	-0.942842	-2.67801	-1.08665	-0.507874	-2.63027	-1.5967	-1.67065	-1.25361	-1.33819	-0.733978	-0.955703
5.69751	-0.093329	-1.71732	6.08378	4.37247	6.19979	6.04373	4.29022	4.93749	5.75044	4.73388	5.60868	4.33985	4.26317	4.89026	0.537225	5.60613	5.45327	-0.306808	5.03395	5.36082	2.11273	5.63079	5.34292	5.64853	6.06547	6.00808	6.4407	5.72887	5.20758	1.60163	5.75211	5.42125	5.30392	5.48204	1.17388	1.59748	5.71776	6.13094	3.31318	5.76562	5.81189	5.55946	4.93897	5.6436	4.7274	4.78045	3.05395	3.8189	3.90201
0.796185	1.70861	0.784208	0.702943	1.26054	0.893091	0.854239	1.39914	0.373218	0.833224	0.724255	1.04164	0.285293	0.54543	0.998037	1.35076	0.484713	0.530331	1.29671	0.493076	0.868937	1.2664	0.850739	1.01814	1.04048	0.933156	1.348	1.3416	0.859638	1.07201	0.629885	0.813431	1.0536	1.28783	0.674386	0.880096	1.8249	0.4399	1.31342	1.86929	0.933414	1.0944	1.02709	0.456944	0.783644	0.967464	1.24572	1.50922	1.32744	0.812415
-0.0982208	0.358329	0.814167	-0.13534	0.0138459	-0.2485	-0.28571	0.327502	-0.426784	-0.100033	-0.0476942	-0.337291	-0.185054	-0.296087	-0.337699	-0.0518122	-0.0849476	-0.148625	0.0799713	-0.223611	-0.0831418	-0.158068	-0.31665	-0.115535	-0.200358	-0.267972	-0.084342	-0.0219469	-0.156085	-0.1257	0.180224	-0.0502157	-0.0747495	-0.062561	-0.456728	-0.967605	-0.175274	0.0100942	0.109286	0.228167	-0.467985	-0.225163	-0.033577	-0.597418	-0.274651	-0.169931	-0.00271893	-0.344969	-0.447238	-0.395901
-0.171692	0.233483	1.12585	-1.86509	-0.751389	-2.12632	-1.28141	0.424971	-2.49018	-1.91316	-0.834353	-1.26827	-2.15009	-0.935526	-2.52497	0.0733128	-3.02039	-2.18154	-0.32443	-0.466682	-2.11312	-1.08449	-1.55386	-2.67368	-2.8908	-0.556269	-0.390562	-0.486051	-1.77606	-0.866735	0.63305	-0.934183	-0.282947	-0.736813	-2.22734	-1.09223	-0.574284	-0.755661	-0.940251	-0.523536	-0.672411	-0.973752	-0.418548	-0.345521	-3.33812	-0.632035	-0.708408	-0.955276	-0.841244	-3.21738
-1.57091	-0.891053	-2.03983	-2.30529	-1.39747	-2.0226	-1.6628	-0.915291	-2.17281	-1.40943	-1.16931	-1.61056	-1.91728	-1.64875	-2.32101	-1.0491	-2.17524	-1.85111	-0.903593	-2.43011	-1.98544	-1.55133	-1.98968	-1.39578	-1.85197	-1.26323	-1.38993	-1.35925	-1.82728	-1.1283	-1.20842	-1.65952	-1.34011	-1.13468	-1.74767	-1.10183	-0.90145	-1.55701	-1.37292	-1.07933	-1.62916	-1.43798	-1.40053	-1.81478	-1.40624	-1.38639	-1.58135	-0.755359	-1.70464	-1.46392
-1.68298	-0.731681	-0.0893807	-2.04554	-1.09308	-1.14617	-1.78697	-0.729193	-2.44165	-0.74856	-1.19322	-2.6995	-1.72409	-1.30285	-2.29383	-0.750344	-1.51953	-2.43474	-1.24513	-1.40323	-1.69691	-1.22648	-3.20028	-0.9743	-1.7185	-1.6803	-2.308	-1.23513	-1.55931	-1.08822	-1.46651	-1.55137	-1.34169	-0.78533	-0.925888	-0.870887	-1.16852	-2.60819	-1.1452	-1.31351	-2.08825	-1.13763	-1.54128	-2.66912	-2.43769	-1.80963	-1.13644	-1.29206	-0.349922	-0.665466
1.29516	0.408746	0.814885	1.34801	0.99036	1.31982	1.23382	0.781987	0.916913	0.972583	0.452147	0.988137	0.556858	1.27505	0.562869	0.440916	1.17021	1.23434	0.696123	0.706844	0.748402	0.985862	1.19467	1.08325	0.901968	1.18076	1.20285	1.25699	1.04082	1.0324	-0.0459199	1.3363	1.13653	0.925879	1.15136	-0.155971	0.187146	1.15865	1.16307	0.745472	0.713187	1.28682	0.9751	0.743096	1.04697	1.30462	0.779008	0.3064	0.545963	0.985507
1.29556	2.08234	2.39267	1.13903	1.59433	1.2868	1.38735	1.93407	1.00142	1.44983	1.38632	1.4948	1.24971	1.89682	1.60426	1.86204	1.25529	1.08191	1.94485	1.04195	1.56211	1.67223	1.70219	1.41635	1.53887	1.65951	1.7043	1.83154	1.5048	1.54786	2.22267	1.43751	1.59453	2.77003	1.41604	2.07771	2.29074	1.23674	1.53971	1.74144	1.87078	1.74777	1.5697	1.05816	1.021	1.37277	1.70104	1.5354	2.06318	2.07416
2.58332	2.55292	3.89727	2.40521	3.29645	3.07203	3.00996	3.09129	2.09817	2.90816	2.78214	2.65918	2.40709	2.25471	2.43779	4.24204	2.34729	2.45062	3.55319	2.09949	3.61923	2.90691	2.59135	3.28672	3.57615	2.48896	2.68051	2.74863	2.33845	2.98148	2.79358	2.33428	3.423	2.57615	2.56895	2.47602	2.91894	2.59138	3.51516	3.21634	3.38396	3.74141	3.13649	2.28044	2.83047	2.99428	3.48064	3.22457	2.00749	2.64519
-0.226564	-0.402076	-0.599269	0.0556526	-0.10194	0	0.0306988	-0.150551	0.275021	-0.184943	0.0171137	-0.325638	-0.722015	-0.799185	-0.687344	-0.864592	-0.0167542	-0.725312	-0.141919	-0.259719	0.182014	0.183842	-0.160122	-0.308792	-0.37327	0.28285	0.0697479	0.432298	-0.730344	-0.360292	-0.48316	0.304195	-0.0550036	-0.259581	-0.723519	-1.28222	-0.734466	0.443091	0.00876904	-0.654488	0.231638	-0.402316	-0.144247	0.0516348	-0.403381	-0.299191	-0.269084	-0.714028	-1.07502	-0.678497
-0.351423	-0.435357	-0.45098	-0.390544	-0.874475	-0.250012	-0.282372	-0.873824	-0.741099	-0.622695	-1.25959	-0.510133	-1.55813	-0.976941	-1.01334	-1.17956	-0.516454	-0.604704	-0.964322	-0.595867	-0.760104	-0.413889	-0.634917	-0.574166	-0.94693	-0.183779	-0.386516	-0.451138	-0.432119	-0.892673	-1.38346	-0.241225	-0.756238	-0.583974	-0.375292	-1.32313	-0.501418	-0.463354	-0.617229	-0.623034	-0.257323	-0.511143	-0.710985	-0.585627	-0.506858	-0.438966	-0.875835	-0.741838	-0.965487	-1.4736
1.67737	2.05195	1.77604	1.49367	1.86713	1.68326	1.84382	2.14037	1.40382	1.9618	1.87941	1.53149	1.13178	1.69164	1.38174	1.6523	1.46878	1.49499	1.75546	1.28461	1.69106	1.91678	1.97568	1.76615	1.86951	1.85613	1.96239	2.05248	1.51782	1.76841	2.53548	1.89687	2.21921	2.41282	1.68073	1.44041	2.1678	1.69677	2.18238	2.09487	1.88194	1.94284	2.13503	1.29783	1.44001	1.58048	1.89887	1.67869	2.09916	1.80375
0.559178	0.798715	0.342749	0.161327	0.744984	0.455154	0.317848	0.74522	-0.240194	0.330411	0.467738	0.00482178	-0.29064	0.233762	0.093935	0.921944	0.0462255	0.0792089	0.360946	0.0247993	0.515782	0.40152	0.31458	0.536792	0.376587	0.140316	0.143186	0.515394	0.575131	0.538964	-0.0864835	0.196887	0.355978	0.892678	0.145102	0.573372	0.242049	0.329464	0.51878	0.822461	0.250949	0.412907	0.42557	-0.216579	0.1065	0.283342	0.670789	0.644799	1.06051	0.564578
0.106169	0.87086	1.78657	-0.081665	-0.0126595	0.0775776	0.24968	0.931362	-0.089447	0.310786	-0.104663	0.246196	-0.421677	0.110055	0.21535	0.470486	-0.221043	-0.062407	0.30557	-0.251768	0.337481	0.283202	0.0785742	0.50476	0.48728	0.36305	0.471607	0.0686731	0.259213	0.51231	0.610005	0.0970001	0.366193	-0.0223465	0.14223	1.04215	0.619948	-0.0735869	0.522763	0.306539	0.321044	0.382998	0.277416	-0.0190887	0.179423	0.304046	0.271928	0.744689	0.0225945	0.112862
-0.269545	1.55182	1.68008	-0.212407	1.45218	-0.236907	0.843972	1.96739	-0.397016	0.179018	0.250644	-0.407872	-0.352593	-0.381503	-0.481348	0.377767	-0.433027	-0.189523	0.268407	-0.446045	0.0258594	0.201097	-0.142677	0.302391	0.209803	-0.579075	-0.0520105	0.438951	-0.228999	0.66812	0.47327	-0.327385	0.785262	0.574724	-0.0651565	-0.145245	-0.378922	-0.25087	1.03428	0.893932	-0.140637	1.60262	1.95096	-0.510478	-0.158547	-0.131763	-0.57208	-0.282405	0.411215	0.414663
-0.12803	0.0454631	-0.366357	0.189871	-0.787092	-0.343459	-0.0706005	-0.301019	0.056716	0.102865	-1.23022	-0.0541306	-0.765939	0.0429225	-0.654634	-0.81439	-0.0938244	0.102795	-0.61509	-0.433311	-0.413085	-0.351618	-0.33155	-0.299679	-0.569022	0.0777149	-0.29746	-0.164591	-0.322518	0.0929222	-0.630336	-0.0330553	-0.498742	-0.531067	0.0162301	0.262778	-0.296163	0.0266814	-0.2707	-0.64291	-0.280274	-0.154404	-0.48061	-0.0948086	0.0434604	0.327579	-0.233869	-0.490682	0.282032	-0.1751
-3.32191	-2.57868	-2.17303	-1.75655	-3.74154	-2.87656	-2.80311	-2.45238	-2.18055	-2.09631	-3.35952	-2.50861	-2.39912	-2.52823	-2.39322	-3.70833	-2.26904	-2.545	-2.38267	-2.04004	-2.44931	-3.07552	-3.13759	-2.68274	-2.82837	-1.74686	-1.58995	-2.3363	-2.03415	-1.87143	-3.0094	-0.605927	-3.42469	-0.960676	-1.96674	-2.0376	-3.52231	-2.04118	-1.99057	-2.75272	-1.14984	-2.54355	-2.56067	-2.52405	-2.16115	-2.52063	-1.95104	-3.01804	-2.86389	-2.64911
-1.59349	-1.26616	-2.91954	-1.60635	-1.82502	-1.7272	-2.22722	-1.5598	-2.54977	-2.43267	-2.11741	-1.99922	-1.94236	-2.63868	-2.0994	-2.11299	-2.5895	-1.97358	-1.45359	-1.67123	-2.12028	-1.71437	-1.95259	-1.67287	-1.87325	-2.29372	-1.43966	-1.3243	-1.77596	-1.14261	-2.07777	-2.28666	-2.05824	-1.12367	-1.96847	-2.49626	-1.45828	-1.88651	-1.86488	-1.62644	-2.04329	-2.12784	-1.88624	-2.65555	-1.74424	-1.80079	-1.14223	-1.2293	-0.956428	-1.94871
0.409199	1.52826	1.99597	0.430255	1.4853	0.68707	1.26867	1.65186	0.180115	0.768943	0.690849	0.0551338	-0.0962429	-0.219075	0.619684	0.890671	0.444776	0.387036	0.221914	0.0816374	0.493952	0.582517	0.569221	0.631612	1.22708	0.0565472	0.870343	0.666383	0.52372	1.12976	0.572365	0.472721	1.20125	0.899767	0.572055	-0.106753	0.802106	0.518793	1.35864	1.4192	0.504864	1.44824	2.17237	-0.0239964	0.376505	0.495255	0.772442	1.26277	1.42407	0.841344
-0.63769	-1.17578	-0.771916	-0.872103	-1.38665	-0.767496	-0.750104	-1.12609	-0.946251	-0.671341	-1.22125	-0.933203	-1.29	-0.872929	-1.51126	-0.797696	-1.00058	-0.836532	-0.686715	-0.43789	-1.15631	-1.01966	-0.39769	-0.962348	-0.971744	-0.944253	-1.05931	-1.36376	-0.742142	-0.752185	-1.08411	-0.861985	-0.969264	-1.1544	-0.842824	-1.57981	-1.43236	-0.44258	-0.96526	-1.39191	-0.748626	-0.938259	-1.12002	-0.513906	-1.79444	-1.22898	-0.660145	-1.28521	-1.13426	-0.795501
4.64676	5.78568	3.66171	4.56285	4.84252	4.60031	4.69279	4.79566	4.59956	4.56504	4.82277	4.29009	4.41105	4.54992	4.02265	4.45964	4.13945	3.95444	4.56268	4.16626	4.61193	4.98927	4.38222	4.53602	4.12751	4.85027	4.83176	5.0132	4.59279	4.80769	4.40745	5.10795	4.49171	4.96289	4.42891	4.07253	4.80753	4.69793	4.63966	5.31826	4.47648	4.50671	4.77244	4.1106	4.14842	5.03477	4.93446	5.8967	4.05476	4.21188
0.277951	0.585824	0.805623	-0.0322762	0.560917	0.0930119	0.210305	0.575441	-0.027133	0.186741	0.501092	0.31505	0.0977049	0.256655	0.333611	0.805915	0.064105	0.119932	0.46305	0.222736	0.251143	0.625516	0.262782	0.430701	0.151988	0.201224	0.467752	0.607751	0.447251	0.588058	0.49633	0.351351	0.3641	0.439483	0.363401	0.258928	0.231938	0.282962	0.474548	0.554059	0.325259	0.409154	0.596494	-0.0794964	0.10738	0.236878	0.375823	0.510032	0.813802	0.491052
0.898767	1.44099	0.992981	0.935061	1.22126	0.882036	1.03681	1.29859	0.670269	0.957068	1.18558	0.835934	0.65928	0.397399	0.719089	1.38629	1.02975	0.898295	1.02993	1.15644	0.911104	1.08569	1.1087	0.965858	1.08578	1.18379	1.2544	1.37992	1.03084	1.16847	0.366928	1.08669	1.0336	1.15566	1.04124	0.883104	1.41265	0.812707	1.18149	1.61478	0.886093	0.929785	0.997272	0.561958	0.682873	1.07002	1.13302	1.45718	1.12306	0.74431
1.4629	1.51516	1.19946	1.29641	1.36025	1.19368	1.18491	1.43014	1.25879	1.12096	1.07032	0.943132	0.521014	1.11565	0.723326	1.18313	1.07354	1.07712	0.904144	1.12163	0.893298	1.33274	1.29668	1.16979	0.939847	1.30853	1.31844	1.22112	1.3218	1.25027	0.257249	1.52318	1.11779	1.08532	1.30769	0.732781	1.33615	1.50196	1.17174	1.33709	1.3462	1.36086	1.06264	1.24458	1.17553	1.27185	1.05121	1.39585	1.04494	1.06723
-0.489033	-1.5283	-2.06863	-0.55826	-1.52646	-0.698078	-0.874244	-1.30268	-1.24724	-0.836161	-1.54287	-1.0604	-1.32364	-1.21722	-1.57392	-1.64112	-0.985546	-1.0482	-1.10016	-1.51223	-1.29098	-1.41632	-0.838425	-1.0172	-1.38185	-1.25799	-0.836621	-1.34768	-0.765912	-0.841629	-1.92979	-1.20575	-1.46238	-1.22954	-0.472205	-2.76574	-1.31733	-1.07012	-1.01699	-1.43422	-0.956723	-1.02366	-0.951255	-0.933657	-0.935528	-0.697634	-1.14876	-0.781381	-0.966526	-1.14041
2.3795	0.655553	-3.96609	2.83849	1.30219	2.35762	2.14855	2.52261	3.43194	2.59288	2.96882	2.65119	2.98337	2.25256	1.58892	0.00360394	2.44386	2.43712	0.937608	2.03212	1.5146	0.411225	1.78554	1.34124	1.32512	3.72215	3.19279	4.09642	2.09249	2.01282	0.963398	3.9181	1.71059	2.62466	1.95656	0.724141	0.465695	2.50163	2.28957	0.704859	1.58069	1.70868	2.21686	2.63085	2.37126	2.69479	2.45333	2.64566	1.41181	2.44525
-1.65068	-0.338641	-2.9945	-1.44643	0.504056	-2.03117	-1.74202	0.997533	-0.13261	0.228071	0.494039	0.121146	0.538697	0.516928	-1.20023	0.943042	-2.52311	-1.61203	-0.316478	-1.34548	-1.44954	-0.973309	-1.71671	-2.42087	-0.392731	1.39465	0.455541	1.56639	-2.55657	-0.152596	-1.45104	0.437588	-1.54516	-0.495723	-3.21864	-2.40187	-1.74448	-0.373377	-0.721819	0.147863	-1.19656	-0.875981	-1.09047	-1.00515	-1.11509	-0.695611	-0.817913	-0.163787	-2.02451	-1.58889
-1.67458	-0.955507	-0.748064	-1.48762	-0.984808	-1.00542	-1.07484	-0.678659	-2.00137	-1.72501	-1.22897	-1.14469	-3.37796	-0.76124	-1.07572	-0.772199	-1.50099	-1.68461	-0.800545	-2.63116	-1.29904	-0.965887	-1.40145	-0.695301	-0.459584	-1.47272	-0.992362	-1.20017	-1.35394	-0.692577	-0.706322	-1.87497	-1.00685	-0.438452	-1.54567	-1.09896	-1.223	-1.52661	-0.958577	-0.790966	-0.971099	-0.721519	-0.814815	-2.95449	-2.41521	-0.81561	-1.28301	-0.824646	-0.49309	-0.95796
-2.19388	-2.14594	-1.40447	-3.05215	-1.70209	-2.50671	-2.28628	-1.95404	-1.98206	-2.57569	-1.56076	-2.12713	-2.05613	-2.39232	-2.54528	-1.85264	-2.09997	-2.75316	-1.82185	-2.26728	-2.00095	-2.28432	-2.36196	-1.98258	-1.78883	-2.26172	-2.15913	-2.1205	-2.59406	-1.92234	-2.67513	-2.04087	-2.30126	-1.92255	-1.74943	-2.67474	-1.51088	-1.85146	-1.8123	-2.13786	-2.43755	-2.03894	-1.73299	-2.86022	-1.59883	-1.90725	-1.90041	-2.40196	-2.45053	-2.31873
-2.76522	-1.61353	-0.672508	-1.92772	0.00772238	-2.48214	-1.03197	-0.729167	-1.39366	-2.23698	-0.101052	-3.09212	-0.871998	-3.10188	-0.858463	0.0994673	-2.04896	-3.60245	-3.02542	-2.02911	-2.57866	-3.15058	-3.29453	-3.20698	-1.15348	-3.31269	-0.876029	-0.834239	-2.58325	-0.941233	-2.85953	-3.02789	-1.47375	-0.921987	-1.18181	-2.84832	-1.62357	-3.17065	-0.934229	-1.07087	-2.69099	-0.980103	-0.00217724	-2.91025	-0.957481	-0.913073	-1.04304	-0.779814	-3.95933	-0.749461
-1.15492	-0.713126	0.62112	-1.45368	-1.34911	-1.09128	-1.26832	-0.251626	-1.77532	-2.0034	-2.05077	-1.2642	-1.15189	-1.82167	-1.97397	-0.512198	-1.72014	-1.49316	-1.14075	-1.74932	-1.6457	-0.977847	-1.47828	-1.22435	-1.57938	-0.884764	-0.989788	-0.726673	-1.83313	-1.8849	-0.872422	-1.14067	-1.09509	-1.05997	-0.910877	-0.66027	-0.982183	-1.17353	-1.05159	-0.908564	-1.51922	-1.56986	-1.36058	-2.04299	-1.96332	-1.74151	-1.16788	-1.22651	-1.5627	-1.39556
0.0782356	0.274805	0.371416	0.0673008	0.92878	-0.00927734	0.277544	0.739316	-0.308353	-0.225711	0.39676	-0.0315447	0.205742	-0.186043	-0.187761	1.2336	-0.533068	-0.374768	0.306957	-0.478293	0.304574	0.14508	0.0455198	0.403421	0.173731	-0.0387373	0.217247	0.902124	-0.377446	0.407923	-0.353347	-0.205297	0.611194	0.556448	-0.573093	-0.196511	-0.125342	-0.169595	0.773057	0.692609	0.149053	0.21945	0.334389	-0.895216	-0.967989	-0.54378	0.531616	0.342793	0.299441	0.36152
1.57036	3.20555	3.28286	1.44509	3.52942	1.68876	2.1496	3.02546	1.17188	1.71574	2.7703	1.74473	2.12323	1.94826	1.88487	3.29263	1.26303	1.16218	2.64259	1.06991	2.41062	2.49209	1.65135	2.21878	2.40113	1.95931	2.50058	2.95385	1.25192	2.41769	2.10979	1.70568	2.31416	3.18406	1.48185	2.44065	2.18519	2.11249	2.74967	3.0571	1.9779	2.38497	2.77452	1.20646	1.16864	2.06048	2.78894	3.0853	2.34513	2.11691
2.88383	3.88816	3.59358	2.87859	4.07249	2.72182	3.20734	3.7562	2.83609	2.93094	3.58442	3.24575	3.4857	3.2969	3.21194	4.15346	2.69478	2.75504	3.52388	2.49691	3.52984	3.50337	2.84245	3.20531	3.33827	3.33291	3.5825	3.81983	2.54173	3.19719	3.04402	3.13885	3.21674	3.81559	2.80059	2.96719	3.24044	3.09842	3.56469	3.72131	3.16669	3.41847	3.64149	2.74207	2.32449	3.07714	3.51567	3.64445	2.9579	3.17224
3.45056	4.68091	4.76599	3.24582	4.84963	3.60397	3.84638	4.54259	3.26767	3.45744	4.40429	3.6145	3.7486	3.7781	3.54117	4.70722	2.98426	2.80721	4.07918	2.93416	3.9143	4.03626	3.24262	3.72716	3.71607	4.07533	4.28061	4.59078	3.21774	3.81398	3.57547	3.91173	3.76274	4.77886	3.41071	3.46532	4.04942	3.74449	4.31071	4.39582	3.74072	3.92116	4.18346	3.31254	3.11793	4.03707	4.25526	4.6644	3.28432	3.52527
3.1349	2.31946	2.30285	3.0612	2.9705	2.95506	2.99679	2.62913	2.68623	2.76453	2.66308	3.059	2.5635	2.86574	2.33887	2.62027	2.6942	2.92949	2.32419	2.61525	2.593	2.68668	2.77934	2.69911	2.46925	2.96625	2.87995	3.02108	2.93833	2.81262	1.75038	3.0198	2.66851	2.84993	3.13502	1.851	2.4477	3.00182	3.02445	2.87891	2.76824	2.98121	2.78665	2.79203	3.09194	3.39422	2.66555	2.49447	2.47772	2.49105
3.09323	2.60395	0.82626	3.78275	2.60339	2.75572	3.13893	2.5095	3.69364	3.30548	4.38596	3.78593	3.88295	4.76037	1.77316	1.02336	3.22187	2.42841	2.64406	2.32769	2.18718	3.65438	2.79879	2.45206	1.98119	4.8677	3.93133	4.11137	2.78764	3.04785	2.50276	3.83883	2.95805	2.29372	3.27196	3.0471	1.58367	4.13498	3.7136	1.19945	2.80066	3.10723	2.9232	3.6249	2.32439	4.1313	2.0902	0.98022	2.49645	2.6892
1.14929	0.0456233	-0.674718	0.795047	-0.275902	1.1805	0.99738	0.331572	0.826966	0.793016	-0.0386333	1.68569	0.461047	0.3158	2.04873	-0.0711174	0.135935	-0.23993	-0.810576	1.67124	1.36579	-0.120405	1.30869	1.33859	1.34085	1.35524	1.96081	2.26271	1.05924	0.867187	-0.705396	2.21577	1.11946	0.667186	0.509423	0.595724	-1.01048	0.268514	0.504308	-0.238088	1.41745	1.52495	1.00693	1.60719	1.78144	1.38974	0.99824	0.924429	0.77721	0.584456
1.27689	-1.86088	-0.647427	1.10147	1.10258	1.15354	1.15796	0.310887	0.596832	0.891924	0.580823	0.846597	0.411728	0.33476	0.0952053	0.273267	0.931118	1.01025	-0.431254	0.215033	0.944454	-0.211338	1.27168	1.14337	1.08262	0.412415	0.67672	0.699195	1.00809	1.58627	0.473729	0.685788	1.1572	0.627877	0.987061	-0.551817	-0.932014	1.3062	1.4195	-0.160908	1.40826	1.57205	1.10402	0.885822	1.04183	1.11973	0.553217	-0.554929	-0.38098	0.544294
0.64141	1.28109	1.44979	0.48051	0.831423	0.388599	0.635229	1.49598	-0.176319	0.626597	0.461366	0.0941734	-0.419653	0.119852	-0.197766	0.700185	-0.0119066	0.216402	0.802345	0.148932	0.717776	0.613013	0.408256	0.671559	0.3825	0.252634	0.526206	0.766569	0.480089	0.646366	0.0321612	0.316105	0.902192	0.638314	0.395623	0.370782	0.499855	0.547099	0.871848	1.27903	0.412555	0.929727	0.745186	0.0213537	-0.00511503	0.665764	0.582952	-0.00123692	0.99402	0.562341
-3.21999	0.0444341	0.180038	-2.42865	0.311024	-3.07826	0.0416698	-0.0399795	-2.82865	0.282876	0.331865	-1.77198	-2.94149	-2.42409	-2.23527	0.329911	-3.02639	-2.47668	-3.03035	-2.40997	-2.90521	-0.180039	-0.0665264	0.194118	-2.84863	-3.17016	-2.90526	-0.0707102	-2.43107	-0.383912	-2.88974	-3.10585	-1.58378	0.197893	-3.66939	-2.80871	-3.16849	1.22576	-0.0515871	-0.589655	-1.98859	-0.24159	-0.147702	-2.56893	-2.43794	-0.259448	-0.0228386	0.263976	0.0737476	-2.82267
-1.36302	-0.483178	-1.00857	-1.2685	-0.981039	-1.49574	-1.08244	-0.311921	-1.23579	-1.84852	-1.42325	-0.836348	-1.40886	-1.25056	-0.846786	-0.814281	-1.2082	-0.907034	-0.749671	-1.48416	-1.37191	-1.41888	-1.7092	-1.01556	-1.21454	-1.72056	-1.10795	-1.09366	-1.18845	-0.817487	-1.17962	-1.60141	-0.87016	-1.10234	-0.995739	-0.675512	-0.719519	-1.27839	-0.658177	-0.867439	-0.774952	-0.733006	-0.927924	-1.05396	-1.06278	-1.2469	-0.574254	-1.27709	-0.686459	-0.789942
-0.463989	1.14852	1.64501	-0.372684	0.994963	-0.241396	-0.326127	0.17502	-0.665349	0.114866	-0.00551033	-0.286972	-0.272606	-0.885917	-0.486684	0.796409	-1.02339	-0.990135	0.202454	-0.707513	-0.349523	-0.00290775	-0.290334	-0.332289	-0.31008	-0.528982	-0.427922	0.176645	-0.825096	0.100273	-0.391597	-0.415007	-0.170775	0.862199	-0.847509	-0.728721	0.330752	-0.504652	0.440533	0.935485	0.198398	0.1313	-0.200887	-0.3161	-0.0473876	0.297948	0.347924	0.954391	0.573688	0.207804
-1.85167	-1.51942	-1.45546	-1.47156	-1.17554	-1.88083	-1.9652	-1.60254	-1.29893	-3.40236	-1.61251	-1.33257	-1.54136	-1.94041	-1.67472	-2.18888	-1.34027	-1.76709	-1.36729	-3.06385	-1.5613	-1.71904	-1.35094	-2.5419	-1.61994	-1.36971	-1.22293	-1.03622	-2.41783	-1.3502	-1.78131	-0.908466	-1.35384	-1.41088	-1.81321	-1.65163	-2.23124	-1.42051	-1.40448	-1.36232	-1.32199	-1.27343	-1.00344	-1.28598	-3.36452	-1.82342	-2.86907	-1.67586	-0.601642	-0.881312
-0.182584	1.41723	-0.2552	-0.224347	0.478426	0.268929	0.509418	1.40696	-1.27095	0.185014	0.0529442	0.111855	-1.0064	0.239054	0.154493	0.359395	-0.106495	-1.0372	1.16305	-2.70648	0.984745	1.49174	-1.10513	0.740535	0.989651	0.164426	0.788887	0.0955973	-0.968038	0.916883	0.331307	-0.44868	0.701587	1.16706	-0.768944	0.921858	1.27787	-0.992128	0.570854	0.934464	0.665123	0.541907	0.704095	-0.0389423	0.089807	0.906125	0.790632	1.33522	1.30823	0.211953
-0.462362	0.0120111	-0.0783563	-0.563298	-0.309457	-0.691618	-0.502197	-0.0166116	-0.640325	-0.565135	-0.54664	-0.226514	-0.549493	-0.506712	-0.528754	0.0290012	-0.441525	-0.243381	-0.161369	-0.163994	-0.450739	-0.352231	-0.579707	-0.250937	-0.45507	-0.27177	-0.144548	-0.178775	-0.323051	-0.177451	-0.413645	-0.294939	-0.349958	-0.118283	-0.0633578	-0.562862	0.0942822	-0.461583	-0.457954	-0.136169	-0.441389	-0.257957	-0.232023	-0.253918	-0.210801	-0.441636	-0.199563	0.0276241	0.0500336	-0.291519
1.37638	1.60439	1.1118	1.11496	1.55209	1.06724	1.26741	1.75663	0.900418	1.05064	1.13894	1.11158	0.684246	1.07144	0.784199	1.2502	0.974462	1.22546	1.11428	0.995277	1.0117	1.35768	1.11053	1.20436	1.08307	1.45117	1.56991	1.54537	1.1748	1.54883	0.529131	1.31347	1.22346	1.99714	1.10633	1.19411	1.43064	1.19966	1.54293	1.61148	1.21188	1.34067	1.68851	0.832796	0.754959	1.38552	1.27822	1.28308	1.53839	1.09581
1.90725	1.76947	1.83372	1.49514	2.43223	1.76046	1.76672	1.94667	1.46701	1.65358	2.18406	1.53279	1.29514	1.80063	1.14099	1.97872	1.432	1.44218	1.70071	1.51803	1.90045	1.70882	1.71212	1.83853	1.83947	1.99199	1.91016	2.09845	1.64493	1.98672	1.72613	1.86049	1.99945	2.05663	1.66757	1.32016	1.43949	1.83447	1.76655	2.03496	1.84766	1.67171	1.78226	1.6435	1.79637	2.00888	1.73385	2.19793	1.6391	1.56551
2.25281	-0.137873	-0.786473	1.72659	1.03359	2.44663	1.9016	0.402257	0.331603	1.84409	1.22477	1.51003	-0.186857	1.65723	0.762269	-0.2126	1.56143	1.5311	0.550052	0.572583	1.63377	1.26638	1.84905	2.06467	1.27861	1.77163	1.7775	1.7735	1.63999	1.81989	0.300605	1.18971	1.13572	1.42097	1.36354	-0.901829	-0.400549	1.47255	1.34254	0.744649	1.80527	1.67637	0.994474	1.48483	1.16983	1.60677	0.535204	-0.312264	1.95664	1.33421
-2.79141	0.722702	1.54866	-2.59558	-0.894063	-2.58707	-2.22232	-0.0937266	-2.09662	-2.64674	-2.87629	-2.57802	-1.13888	-2.39399	-1.94221	0.439049	-1.84602	-2.2994	-1.79825	-2.04431	-2.2363	-2.55634	-2.25841	-1.84696	-2.20422	-2.19223	-2.12601	-1.6472	-2.35995	-1.7063	-2.35257	-2.26289	-2.35756	-1.58425	-2.10062	-1.56008	-1.82187	-2.79511	-1.68762	-0.893064	-2.42555	-2.44654	-1.98242	-1.97545	-2.45731	-1.79235	-1.31043	-1.59599	0.0479155	-1.88798
-1.15045	2.25664	0.976175	-0.8516	0.29821	-2.52703	-1.10848	1.23579	-2.3977	-1.08006	-2.14945	-0.408534	-0.867635	-0.861772	-0.391872	1.70809	-2.41988	-2.43816	0.684646	-2.74709	-0.418041	0.161014	-1.28507	-0.403705	-0.817916	0.258817	0.589588	0.979997	-0.317009	-0.56712	0.217283	-0.394146	-0.0341563	-0.226348	-0.713619	0.169707	2.83307	-0.602924	-0.941916	1.98523	-0.804489	-0.953279	-0.832305	-3.17048	-2.28497	-1.00565	0.311456	1.65613	0.925036	-0.150987
0.847193	-0.26315	0.73289	0.646779	0.119268	0.681599	0.550951	-0.49495	0.268251	0.145396	-0.429498	0.244553	0.424862	0.750447	-0.133514	-1.85249	0.708904	0.123465	-0.728909	0.600173	0.362186	-0.0350056	0.867077	0.912345	0.749596	0.639199	0.656142	0.868559	0.702037	0.252708	-0.26602	0.637716	0.289656	-0.356469	0.2278	-0.608037	-0.945158	0.618038	0.127825	-0.711662	0.925933	0.342882	-0.178381	0.0671377	-0.475467	-0.0321999	-0.0596752	-0.918698	0.061595	0.166606
1.07086	1.52326	0.934083	0.923995	1.26532	1.07199	1.06485	1.1237	0.80497	1.22916	0.989717	1.13692	0.768222	1.11379	1.11218	1.37751	0.89818	1.06394	1.32129	0.948402	0.916265	1.15789	1.18854	1.12813	0.998047	1.15456	1.31332	1.38624	1.1085	1.24264	1.30387	1.20016	1.17243	1.40318	1.00518	0.990305	1.53302	0.969933	0.954814	1.52088	0.912198	1.11599	1.10225	0.82603	1.00697	1.08139	1.09433	1.43983	1.35316	1.20323
2.59351	3.44403	3.13915	2.55174	3.64346	2.7051	2.79797	3.51202	2.32948	2.84108	3.22012	2.58968	2.95532	2.51412	2.38336	3.38299	2.08926	1.9125	2.82867	1.99008	2.71723	2.88106	2.3955	2.86084	2.92678	2.94806	2.99935	3.48764	2.44405	2.85096	2.73682	2.75613	2.5675	3.7463	2.58188	2.28778	2.93048	2.63686	3.08463	3.24921	2.60153	2.67253	3.09083	2.26022	2.28857	2.95242	3.052	3.58632	2.64935	2.46964
-0.289698	0.793324	2.67709	-0.261423	1.16151	-0.0349998	0.463579	1.42536	-0.120984	-0.113131	0.682214	-0.507547	0.685923	-0.672482	-0.325371	0.813487	-0.0102472	-0.0159726	-0.225088	0.112758	0.0555844	-0.413808	-0.101251	0.0234842	0.213243	-0.359164	-0.10423	0.559107	-2.56411	0.356837	-0.0383964	-0.466406	-0.133732	0.860906	0.14144	0.160975	-0.51487	0.0580983	0.913995	1.05178	-0.0564919	0.717897	1.31446	-0.429214	0.296728	-0.160538	-0.0275354	-0.205485	0.362728	-1.18145
-0.136521	0.0674253	-0.369989	-0.193453	-0.0919414	-0.240078	-0.426951	-0.219454	-2.9223	-0.536613	-0.299508	-0.0717726	-1.39052	0.131239	-0.0246763	-0.198428	0.152139	-0.539663	0.279894	-2.48463	-0.222376	-0.0823984	-0.190753	-0.0613976	-0.38111	-0.480694	-0.533867	-0.269059	-0.374567	-0.126568	-0.137776	-0.984881	-0.260103	-0.114789	0.157683	0.27159	0.240674	-0.25517	-0.364147	-0.540694	-0.312812	-0.623197	-0.252622	-0.686175	-0.414122	-0.214492	-0.106743	0.169558	-0.443498	-0.653537
0.455349	-1.21941	-2.76437	0.338441	-0.0657897	0.684442	0.451969	-0.597841	0.378386	0.318537	-0.0436659	0.564298	-0.200144	0.30187	0.412897	0.166679	0.167623	0.0439277	-0.236571	0.506325	0.293479	0.245006	0.348668	0.382452	0.296319	0.577034	0.17209	0.0432081	0.649666	0.421595	-2.44724	0.791483	0.134188	-0.355034	0.457997	-3.37851	-0.569616	0.338459	0.1226	-0.708924	0.475421	0.767282	0.559868	0.489636	0.700496	0.589415	0.267128	-0.426847	-0.648365	0.0676007
-1.27179	-0.769763	-3.3136	-1.07372	-0.601395	-0.667994	-0.902501	-0.447654	-0.880231	-1.45018	-0.363436	-1.33152	-0.620194	-1.27333	-3.26998	-0.425267	-1.02216	-2.94404	0.293199	-2.98712	-0.609901	0.301207	-1.63316	-0.960391	-0.985755	-1.13125	-1.44641	-0.62282	-1.64046	-0.244002	0.0483203	-0.802452	-0.57774	-0.95381	-1.21907	-2.59015	-0.440543	-0.708369	-1.1098	-0.738204	-0.978941	-0.8968	-0.732967	-1.91175	-1.46914	-1.09635	-0.99618	-0.590085	-1.43139	-2.51667
0.968644	1.49577	1.59639	0.721509	1.2174	0.928904	1.06168	1.45072	0.594634	0.833211	1.02725	0.949022	0.513813	1.07169	0.887872	1.2644	0.770948	0.873715	1.36797	0.518694	0.989357	1.32784	0.891842	1.1621	0.902761	1.2596	1.27125	1.44129	1.01222	1.29686	1.09171	1.12041	1.34975	1.41664	0.930449	0.742881	1.48335	0.954298	1.32904	1.43082	1.21963	1.28541	1.30543	0.755247	0.728869	1.06937	1.26534	1.00916	1.42935	1.06055
0.782393	0.165814	-0.873855	0.536189	-0.375963	0.70336	0.359108	-0.0787072	0.00997829	0.172307	-0.279998	0.585634	-0.653624	0.343433	0.503822	-0.401332	0.206643	0.219738	0.455951	0.149961	0.148	0.550147	0.249114	0.34867	0.268538	0.498345	0.438669	0.533959	0.656262	0.663129	-0.200119	0.492834	0.09374	0.237659	0.638124	-0.10643	0.542018	0.168543	0.311165	0.333996	0.422691	0.363903	0.302319	0.0803089	0.379424	0.690837	0.45967	0.58542	0.197701	0.134437
-0.148005	0.930892	1.42483	-0.36655	0.135063	-0.522745	0.0674381	0.692564	-0.744643	-0.611527	-0.341475	0.27779	-0.526822	-0.0355248	0.249035	0.982105	-0.324753	-0.874612	0.421418	-0.155836	0.111823	0.524913	-0.328986	0.345508	-0.0545988	0.0729752	0.256812	0.144663	-0.497626	0.0612602	-0.0124059	-0.519798	0.0898376	0.368109	-0.370674	0.298384	0.79721	-0.419101	0.243623	1.02508	0.55412	0.611789	0.439467	-0.333146	-0.214936	-0.14561	0.37584	1.0589	0.719636	0.0473571
-1.23527	-0.879138	-1.06772	-1.65366	-1.10014	-1.23535	-1.18211	-0.988526	-1.26559	-1.03416	-1.28543	-1.35246	-1.785	-1.1858	-1.32341	-0.870781	-1.99673	-1.87063	-1.18709	-1.27857	-1.5422	-1.33155	-1.06046	-1.15404	-1.01712	-1.21125	-1.23787	-1.01856	-1.16389	-0.863571	-2.06285	-1.241	-1.20873	-1.12135	-1.25018	-0.987207	-0.843398	-1.41741	-1.09177	-0.819105	-1.36405	-1.19193	-1.13677	-1.30176	-1.59637	-1.29974	-0.977897	-1.12087	-0.803361	-1.38415
-1.35315	-1.96635	-3.04237	-1.25982	-1.53988	-1.31573	-1.48977	-1.60017	-0.885724	-1.08085	-2.2944	-1.41955	-2.81509	-1.42578	-1.31306	-2.37672	-1.28598	-2.15051	-2.32902	-1.25573	-1.52134	-3.63223	-1.23006	-1.66461	-1.30004	-1.01213	-1.24786	-1.73215	-0.919147	-1.4039	-1.78593	-1.31779	-1.49475	-2.14059	-1.29441	-2.78811	-1.51681	-1.29985	-1.59383	-1.26182	-1.38082	-1.72193	-1.60056	-1.49498	-1.59878	-1.4473	-1.545	-1.39648	-2.13385	-1.39657
-2.43571	-0.55035	-0.351032	-1.74293	-2.00104	-1.73223	-1.95804	-0.735217	-2.86851	-2.64948	-2.42446	-1.83113	-1.52414	-2.79003	-1.45563	-1.12837	-2.58995	-2.36384	-1.87186	-2.25354	-2.36434	-1.46562	-2.67172	-2.45587	-2.55404	-1.87981	-1.70958	-1.69491	-2.64566	-2.50502	-3.09263	-2.7009	-2.31858	-1.84991	-2.6753	-2.29197	-1.55498	-2.26954	-2.46991	-1.56071	-2.25972	-2.50188	-2.27697	-2.00845	-2.54702	-2.72505	-1.7209	-2.1259	-1.74901	-2.74937
-0.27311	0.9208	-1.13961	-0.529841	0.160385	-1.10915	-0.398637	0.230036	0.34284	0.131583	0.541281	-0.166096	0.350495	-0.265773	-0.0469017	0.383317	-0.912122	-1.31701	0.423515	-0.483723	-0.265692	0.499857	0.329552	-0.29708	-3.12524	0.361029	0.475718	0.75938	-0.645917	0.244802	-0.22444	1.0275	-0.0513158	0.758427	-0.253253	-0.103875	0.66269	0.168507	0.282043	0.639823	-0.937848	0.0904856	0.578138	-0.227679	-0.391627	0.468016	0.582804	1.36958	-0.27079	0.0562053
2.30597	2.40845	-0.274875	2.77996	2.30577	2.34768	2.17762	2.1353	2.97488	2.36423	2.97412	2.77794	2.7003	2.83789	2.00974	1.05975	2.10335	1.54381	1.49271	1.84012	2.26261	1.85625	2.0199	2.00561	1.94277	3.81638	3.18905	3.48509	1.90799	2.01804	2.0385	4.05225	1.83197	2.8767	2.19711	0.554492	1.97291	2.94425	2.25442	2.26066	2.18687	2.27718	2.5757	2.71142	2.15138	3.3642	2.81557	3.88627	1.12364	2.04337
-2.03264	-1.77266	-2.08546	-2.68752	-1.63927	-2.0582	-2.01935	-1.2731	-2.76702	-2.45647	-1.82157	-1.97784	-2.87285	-2.88623	-2.63714	-0.996518	-2.66339	-2.12663	-2.02435	-2.28486	-1.9782	-2.20653	-2.40499	-2.09255	-1.93322	-2.19417	-1.62458	-1.60661	-2.47187	-1.69895	-3.17022	-2.25768	-1.86177	-1.77295	-1.75542	-2.00555	-2.15344	-2.15243	-1.64736	-1.59782	-1.86372	-1.66096	-1.57535	-2.71702	-2.06763	-2.23384	-1.55209	-1.62544	-1.77658	-1.83535
2.54361	0.0883613	-0.765612	2.0617	2.56389	2.1441	2.06266	1.57352	2.5225	1.9256	2.08067	1.92739	2.02973	2.62395	1.0189	-0.200038	2.30463	2.25061	0.78883	1.90681	1.1607	1.09579	2.17557	1.77553	1.37697	2.64841	2.67424	2.30769	1.67127	1.87097	0.165349	3.15777	2.00511	1.28378	1.35955	-0.274224	0.969719	3.18554	1.85862	0.974774	2.19019	2.29531	1.74313	2.40416	1.8219	2.68987	0.885927	1.35851	0.624274	1.86353
0.0191956	0.0505919	0.265103	-0.401252	0.259945	-0.648403	-0.0828972	0.0132499	-0.0395088	-0.230084	0.264003	-0.240911	-0.053813	0.188347	-0.09974	0.545244	-0.107083	-3.79731	0.485705	-0.612588	0.0834813	0.0620337	-2.4911	-0.249744	-0.200395	-0.48269	-0.00219917	0.0940905	-0.216209	-0.077426	0.194718	-0.605853	-0.00795794	-0.00151062	0.00837183	-0.239377	0.321938	-0.210242	-0.0622482	0.117393	-0.226713	-0.15704	-0.184162	-2.40736	-2.61591	-0.226049	0.263126	0.242948	0.313272	0.52319
-0.312577	0.667033	0.932524	0.118913	0.169586	-0.532281	-0.0973206	0.825496	-0.370324	-0.0465827	-0.0664902	-0.487246	-0.888236	0.0233045	-0.517046	0.256011	-0.0501003	-0.240161	0.158113	-0.539461	0.20504	0.335502	-0.560082	0.107256	-0.135873	0.0667706	0.0197086	-0.155152	-0.180123	0.0191898	-0.117091	-0.210245	-0.0829215	0.129243	-0.0214915	0.816214	0.135306	-0.0951982	0.186639	0.371129	-0.369682	0.0202951	-0.0440102	-0.172911	-0.458532	0.166808	0.386633	0.353028	0.349339	-0.0538211
1.82289	2.08574	2.44766	1.50976	2.04316	1.75833	1.7486	1.64045	1.39834	1.05285	1.60368	1.96611	1.17653	1.96268	1.8722	1.91172	1.4236	1.53746	2.22439	1.52162	2.05667	2.12906	1.32226	2.07911	2.00107	1.95919	1.96635	1.96685	1.72373	2.14553	2.02342	1.803	1.88531	1.87716	1.81713	1.45279	2.27363	1.62311	1.97358	2.09329	1.99706	1.92957	2.05662	1.43148	1.59262	2.01542	1.98586	2.02515	1.88193	1.9718
0.14633	1.03145	-0.0357041	-0.639534	0.353126	0.0847225	0.118581	0.460322	-0.214249	-0.085547	0.0708294	0.149851	-0.19623	0.158504	0.623952	0.86999	-0.158214	-0.848227	0.821054	0.108959	0.276557	0.682991	0.0401258	0.30589	0.0887156	0.512338	0.649079	0.665771	0.300545	0.473399	0.0622249	0.479641	0.531153	0.654114	-0.190223	0.239967	1.26912	0.0484986	0.346143	0.980051	0.490125	0.356548	0.510023	-0.015871	-0.00837183	0.36478	0.667261	1.0611	0.632583	0.287565
1.17714	1.11042	-0.102426	1.38169	0.89031	1.09332	1.13081	0.859508	0.950295	1.41361	0.847249	1.06458	0.226884	1.16854	1.06581	0.570457	1.27054	1.1317	0.92365	0.473926	1.30287	0.949559	0.967751	0.894137	0.945434	1.15209	0.971556	1.00951	1.34582	1.19638	0.905097	1.15626	0.947653	1.28106	1.20394	1.58457	0.752863	1.25935	1.07831	0.97948	1.32994	1.27749	0.964038	1.13359	1.4999	1.65882	1.09392	1.17003	1.24569	1.27963
2.79582	1.50245	1.87375	2.85931	2.11952	2.74561	2.77953	1.57731	2.25364	2.42547	1.96204	2.22728	1.2344	2.36645	1.90318	1.25118	2.46339	2.47746	1.78356	1.8521	2.18733	2.04434	2.64714	2.57981	2.42709	2.56122	2.63684	2.45525	2.73545	2.56955	1.91167	2.33414	2.38268	2.54362	2.7289	1.45172	1.63256	2.61202	2.48891	2.13277	2.48039	2.4134	2.29262	2.26848	2.18234	2.74424	2.2003	2.2503	1.55145	2.42918
2.33851	1.32835	0.72195	2.1365	2.4635	2.09758	2.1869	1.55898	1.97787	1.82529	1.92065	1.49827	1.53013	2.28619	1.32531	1.56454	1.95717	1.93114	1.69589	1.57257	1.7088	1.87094	2.24275	2.08839	1.94701	2.2128	2.25822	2.23131	1.97885	2.19312	1.139	2.23247	2.1532	1.87116	1.94518	1.15614	1.84424	2.52891	2.01217	1.75375	2.12537	2.11279	1.65187	1.55934	1.2797	2.14312	1.58399	1.80754	1.00276	1.9251
-0.119196	-0.64685	-0.848958	-0.252724	-0.972059	-0.193063	-0.257377	-1.26998	-0.558268	-0.5175	-4.08191	-0.0224056	-3.17872	-0.697628	-0.399042	-1.35912	-0.0405531	-0.277369	-0.523155	0.109371	-0.728568	-0.125259	-0.327958	-0.739987	-0.826739	-0.461548	-0.266455	-0.839237	0.086565	-0.640594	-0.753045	-0.85734	-0.710539	-1.36807	-0.550829	-0.467782	-0.644268	-0.202314	-0.800646	-0.830134	-0.446668	-0.555876	-0.930492	0.0219669	-0.153467	-0.465841	-0.700985	-0.920322	-1.0553	-0.998073
0.503205	1.4013	0.39522	0.50843	2.15626	-0.310112	0.493982	1.3889	1.01274	0.279884	2.12855	0.399336	1.62769	0.57327	1.17361	2.21472	0.354453	0.659736	0.817304	0.465188	0.862971	0.297336	0.347418	0.494491	0.947577	0.700086	1.33869	0.826255	0.491738	1.37992	0.417012	0.468295	0.708967	0.586058	0.864829	0.194136	1.37148	0.496201	1.49368	1.85616	-0.322086	1.12338	1.99333	0.428475	0.212416	0.803466	1.58361	1.87548	-0.940221	0.926581
-2.38886	-2.93413	-0.474267	-2.05319	-0.602148	-2.99041	-2.26207	-2.09495	-3.5704	-2.01867	-1.12158	-2.68719	-0.900496	-2.35869	-2.34603	-1.84716	-2.94365	-3.10236	-1.91073	-2.59883	-2.22188	-3.39039	-2.44051	-2.29094	-1.71171	-3.3942	-1.85596	-1.404	-2.59702	-1.96438	-3.02243	-2.11215	-3.538	-1.76999	-1.91623	-2.33107	-3.09493	-3.30613	-1.2295	-2.31591	-2.04569	-3.02647	-1.91786	-3.48383	-4.29975	-2.79487	-2.55453	-1.09485	-3.30189	-2.54042
0.0216732	0.143836	0.0538392	-0.230495	0.257873	-0.0151644	0.02069	0.374117	0	-0.180112	0.299767	0.0816231	-0.0878935	0.0510926	-0.0138245	0.25498	-0.16641	-0.113407	0.174829	0.223269	0.204566	0.119576	-0.110289	0.0211716	-0.0184689	0.178206	0.11316	0.173353	0.0837278	0.204204	-0.328973	0.120543	0.109761	0.412879	0.0536256	0.0281925	0.827879	0.0807195	0.0918941	0.20405	0.147717	0.153747	0.264355	-0.0767822	0.187021	0.13837	0.35748	0.452685	0.559329	0.0325503
-0.166699	0.810616	0.237633	-0.431759	-0.160372	-0.479095	-0.294174	0.660759	-0.405228	-0.0137248	-0.571635	-0.130371	-0.741353	-0.119092	-0.250598	0.158377	-0.353039	-0.202264	-0.293513	-0.859632	-0.327432	0.130733	-0.579753	-0.0718069	-0.190477	-0.132656	-0.0871878	0.0279188	-0.330027	-0.00653362	-0.299181	0.0534391	0.0645728	-0.12847	-0.303781	0.661053	-0.0639105	-0.333163	-0.0531797	0.105292	-0.355451	0.157045	0.071476	-0.603022	-0.651601	-0.106512	0.0542479	-0.105009	0.621222	0.223913
1.73042	2.24443	1.76072	1.48507	1.97464	1.50911	1.83562	2.06849	1.6213	1.89467	2.05449	2.04681	1.58019	1.51387	1.84126	2.3614	1.41166	1.54289	1.83563	1.65432	1.69824	1.77626	1.48413	1.84862	1.48251	2.03306	2.28531	2.12906	1.71563	2.03785	1.02545	2.09336	1.86678	2.10567	1.91385	1.75455	2.13764	1.91416	1.97063	2.18148	1.92327	1.92274	2.04028	1.68752	2.04999	2.10363	2.10009	2.10842	1.91346	1.8441
-0.744794	-0.828805	-0.814274	-0.710036	-0.20816	-0.570484	-0.657799	-0.497462	-2.85433	-0.619984	-0.145286	-0.986499	-0.65212	-0.745792	-0.656193	-0.71967	-0.672101	-2.06186	-0.720724	-0.513794	-0.724111	-0.374593	-0.527133	-0.536103	-0.700853	-1.25742	-0.977898	-0.489153	-0.60433	-0.475733	-0.27935	-1.10079	-0.45849	0.647364	-0.91014	-0.74639	-0.229652	-0.634693	-0.791583	-0.539095	-0.62985	-0.756812	-0.602527	-2.57597	-3.46685	-1.31465	-0.915532	-0.84813	-1.21748	-0.51544
0.205016	0.0948367	0.569562	-0.411868	0.048223	-0.217246	-0.392892	0.340766	-0.228723	-0.924359	-0.281347	-0.568509	-1.01696	-0.0690761	-0.59244	-0.177285	-2.11454	-0.491133	-0.138823	-0.761441	-0.458111	-0.184431	-0.920845	-0.524607	-0.799355	0.354965	0.206692	0.29673	-0.744466	0.122813	-0.682039	0.243718	0.238426	0.207485	-0.0760694	-0.898479	-0.0670633	-0.144535	0.242764	0.417919	-0.391681	0.217065	0.29107	-2.64963	-0.343716	0.256454	-0.141991	0.0343828	0.326358	-0.272447
-2.26385	-2.88478	-1.83302	-2.49645	-3.05327	-2.3953	-2.64789	-3.51997	-2.40428	-2.7793	-2.86163	-2.20196	-3.0041	-2.3996	-2.78259	-3.4098	-1.90945	-2.60208	-2.73617	-3.15122	-3.08537	-3.41846	-2.58303	-2.69683	-2.34214	-2.76795	-2.53791	-2.41801	-2.28647	-2.46978	-2.50083	-2.74958	-2.56248	-3.25504	-2.24936	-2.23908	-2.12378	-2.4187	-3.03882	-3.0142	-2.37863	-3.0465	-2.2635	-2.38959	-2.43293	-2.84086	-2.42517	-2.73143	-2.45698	-2.33277
-1.2324	-1.53295	-2.97933	-1.46417	-1.58587	-1.2984	-1.2787	-1.99159	-2.45732	-1.05413	-1.0914	-1.68773	-1.85527	-1.01864	-1.25955	-2.26468	-1.10632	-1.21935	-1.00593	-2.22201	-1.04898	-0.897566	-1.08808	-1.36012	-1.14443	-1.74577	-1.21265	-1.48418	-0.790873	-1.04757	-2.35812	-1.55647	-1.0831	-0.49044	-1.05939	-1.27659	-0.935133	-1.37985	-1.04016	-1.29594	-1.07625	-0.820562	-1.17061	-1.25426	-1.05591	-0.873375	-1.36201	-2.301	-0.318814	-0.204482
-1.42793	-1.92583	-3.47693	-1.09476	-1.86096	-1.26182	-3.59965	-1.71506	-2.46616	-2.40338	-3.04965	-1.34796	-1.02399	-1.02451	-1.22816	-2.96288	-1.40164	-2.64756	-3.23717	-1.44913	-2.83304	-3.40321	-2.52479	-1.51067	-2.26549	-0.917969	-1.99288	-1.48242	-1.36221	-1.33275	-2.34284	-1.07774	-1.60591	-1.60837	-1.36314	-2.32502	-1.63242	-1.4577	-1.95513	-3.64268	-1.27997	-1.7484	-1.48738	-1.34008	-1.25138	-1.44497	-1.42883	-1.25196	-1.67701	-1.33561
0.664209	1.15516	0.540297	0.476758	0.873065	0.662719	0.85111	1.0566	0.47786	0.678003	0.532383	0.925587	0.566439	0.348656	0.904322	1.44973	0.240411	0.604033	0.704727	0.787879	0.714801	0.755649	0.59168	0.764441	0.666919	0.706365	0.908438	0.781544	0.768613	0.935588	0.111954	0.604934	0.705957	0.648339	0.870644	1.13316	1.03313	0.668528	0.87589	0.948653	0.849272	0.978329	0.908693	0.579509	0.83554	0.691219	1.01163	0.790015	0.84288	0.638795
-1.61216	-0.777843	-1.50646	-2.97592	-1.527	-1.43237	-1.45244	-0.985919	-1.7838	-0.841156	-0.914808	-0.566147	-2.65474	-1.62574	-0.241007	-0.346613	-2.94075	-2.23227	-0.794606	-3.94166	-1.33563	-1.2325	-1.26096	-0.940503	-1.6707	-1.04574	-1.42756	-1.02474	-1.16544	-1.51932	-1.28981	-1.28953	-1.35929	-1.12621	-0.904994	-0.701632	-1.01163	-0.663791	-1.46913	-1.29553	-1.33451	-1.57152	-1.56926	-2.52867	-2.00906	-1.37485	-0.852212	-0.876847	-1.24041	-1.09161
0.559527	-0.966923	0.0271592	0.0548191	-0.34072	0.68767	0.559554	-0.966089	-0.443752	0.288769	-1.05702	0.511013	-0.705953	0.0521455	-0.125966	-1.50747	0.172538	0.0852389	-1.39222	0.721445	0.10897	-0.244985	0.788901	0.43304	0.422775	-0.0156507	0.179704	0.0405159	0.246068	-0.00790596	-1.11205	0.0684147	0.101758	-0.396245	0.157056	-1.26123	-0.934805	0.286688	0.163	-0.616049	0.909621	0.590442	7.24792e-05	0.354395	0.374587	0.263543	-0.372511	-1.12423	-0.835601	-0.598288
0.508909	0.210721	1.9881	0.434372	1.0352	-0.0211	0.791429	1.63405	0.103374	0.451209	0.981244	0.585481	0.291557	-0.0619502	0.535681	1.85539	0.146693	0.381223	-0.638296	0.862082	0.363721	-0.807435	0.338722	0.301209	0.032424	-0.173622	0.136584	-0.118538	0.382454	0.843045	0.227104	-0.102098	0.388634	0.118773	1.1036	1.32548	-0.480769	0.611813	1.12169	0.406152	0.167881	1.10306	0.989286	0.299078	0.840059	0.78998	0.590187	-0.366752	0.765884	0.935626
1.13005	1.00003	1.06377	0.80441	1.31285	0.808177	0.981671	1.45681	0.976553	1.07947	1.14271	0.946216	1.20083	0.658434	1.05273	1.70011	0.903052	1.22146	0.832497	1.58996	0.81331	0.739233	0.71806	0.936399	0.818721	0.777825	0.874674	0.674712	1.34169	1.40234	0.00888968	1.07347	0.947365	0.367109	0.943299	1.23603	0.889362	0.845563	1.44384	1.19624	0.675199	1.55275	1.33315	0.917203	1.22389	0.935417	1.26618	0.791981	0.478417	1.20826
1.17502	2.55397	0.654013	1.19948	0.920717	0.889694	1.23094	1.7486	0.639711	0.785112	0.499311	0.774266	0.663045	1.028	0.702712	1.85778	0.869301	0.851435	2.55283	0.474631	1.09924	2.13372	1.28039	1.41935	0.828006	0.672666	0.701779	1.64508	1.16617	1.66151	1.60933	0.713733	1.18965	0.886333	1.40315	1.9264	2.27933	0.995466	1.4945	1.82822	1.17718	1.3679	0.817261	0.688659	0.772646	1.01554	1.49774	1.37127	1.02967	0.926219
2.45852	1.62485	1.51203	2.39827	2.13437	2.30334	2.31115	1.96775	2.55365	1.97035	2.5174	2.6156	2.47176	2.8226	2.21964	1.58221	2.26529	2.19308	2.06214	1.99784	2.05048	2.25202	1.88151	2.17044	2.09276	2.81353	2.53342	2.65805	2.29076	2.36323	2.15108	3.05816	2.11077	2.55396	2.59386	2.03575	2.45243	2.53633	2.19878	2.13474	2.24185	2.24683	2.20948	2.21627	2.22888	2.56178	2.10655	2.72564	2.09341	2.47499
-0.0631828	-0.140158	-0.392684	-0.213811	0.281119	-0.328059	-0.307806	-0.00988817	-0.535061	-0.16272	0.164215	-0.433858	-0.268531	-0.265196	-0.264128	0.291996	-0.209036	-0.350572	-0.0825367	-0.366993	-0.193553	-0.043273	-0.0672407	-0.0424118	-0.119848	-0.19125	-0.0294065	0.0374851	-0.143838	0.0314035	-0.185025	-0.0150604	-0.243722	-0.0811529	-0.265153	-0.227367	0.0637035	-0.125095	-0.190193	-0.033668	-0.133133	-0.0971432	0.155017	-0.157547	-0.193326	-0.0159292	-0.197524	0.0409632	0.240535	-0.12152
0.1275	-0.196376	0.309004	0.269324	-0.400839	-0.00458813	-0.0627098	-0.108887	0.686713	-0.266002	-0.517056	-0.359053	-0.234215	-0.449328	-0.635787	-0.35112	-0.245624	-0.379126	-0.398887	-0.69118	0.350156	-0.258025	-0.25647	-0.106094	-0.597783	-0.123392	-0.426114	-0.338221	0.208034	-0.133016	-0.529097	0.87683	-0.600299	-0.152896	-0.566959	-0.108304	-0.232975	-0.861436	-0.399486	-0.309234	0.140538	-0.229267	-0.376396	1.22747	0.0496688	-0.28184	-0.0223303	-0.237513	0.0727453	-0.193014
-2.84472	-0.0872464	-0.909437	-2.69366	-1.04649	-3.47869	-1.40373	-0.936826	-1.1045	-2.13729	-1.40385	-2.90978	-2.45546	-3.14762	-1.66745	-1.16876	-3.85355	-1.18407	-2.73864	-2.28641	-1.32147	-1.19415	-3.25878	-2.22003	-3.59129	-1.26093	-1.03958	-1.28255	-1.60854	-1.00885	-1.75216	-2.14012	-3.14882	-1.31777	-1.19927	-0.151567	-0.871612	-1.32426	-1.15768	-0.836655	-2.48229	-1.14906	-1.06401	-3.3247	-2.6829	-1.88461	-1.03933	-1.077	-0.787667	-1.22887
-0.375833	0.108853	-0.525078	-1.00757	-0.241071	-0.45063	-0.390002	-0.240338	-1.34579	-0.590819	-0.521362	-0.405484	0.00561428	-0.710162	-0.567935	0.125327	-1.164	-0.855426	0.0895653	-0.82103	-0.269271	0.0655031	-0.691675	-0.138484	-0.314103	-0.542023	-0.133713	-0.0107307	-0.773875	-0.370045	-0.412437	-0.929152	-0.188291	0.408015	-0.781703	-0.197842	0.240923	-0.646767	-0.0207205	0.385823	-0.399795	-0.330074	-0.19884	-0.952138	-0.343982	-0.383421	0.113643	0.0142393	0.119445	-0.192186
2.18584	2.67656	1.62094	2.30131	2.89561	2.05098	2.34888	2.33887	1.7921	2.19148	2.03349	2.35167	1.89041	2.04551	1.91263	2.4757	1.44624	1.40916	3.17672	1.58694	2.75911	3.3668	2.2963	2.7981	2.65673	2.7485	3.01317	3.2425	1.9235	2.26947	2.16816	2.45123	2.73617	3.0159	2.23134	2.39424	3.41942	2.38123	3.0455	3.81391	2.2986	2.47928	2.35257	1.66003	1.90176	2.34492	2.96954	3.33886	2.38765	2.31401
-1.62967	-0.838965	-0.878651	-2.7218	-1.06217	-2.75671	-1.53866	-0.439355	-3.0184	-3.6615	-0.762221	-2.63614	-1.5084	-3.21882	-2.89357	0.155168	-2.26938	-2.2613	-2.47799	-2.1324	-1.40317	-1.97035	-2.36864	-1.67763	-0.716347	-2.72944	-1.974	-1.25158	-2.7533	-1.25583	-2.73531	-2.74026	-1.92639	-1.26509	-3.4025	-3.65708	-1.94992	-2.81969	-1.89051	-2.47121	-2.80705	-2.69728	-2.12608	-2.50709	-2.49367	-2.7072	-2.97846	-1.34027	-2.08271	-1.30235
-0.145427	-1.05485	-1.29846	-0.566179	-1.04007	-0.303823	-0.478016	-1.15814	-0.792032	-0.556893	-0.751462	-0.404063	-1.26923	-0.762679	-0.746609	-1.35428	-0.801859	-0.641774	-0.971262	-0.251847	-0.582018	-0.745307	-0.690525	-0.361192	-0.687146	-0.543501	-0.568773	-0.619363	-0.52651	-0.562061	-0.986608	-0.581396	-0.593456	-0.501925	-0.375006	-1.39934	-0.889307	-0.710875	-0.373746	-0.880296	-0.257247	-0.325494	-0.64747	-0.278071	-0.0621209	-0.188448	-0.71467	-0.777189	-0.298483	-0.744513
0.904548	-0.152724	-0.185935	0.687498	0.230697	0.703167	0.513221	0.0165105	0.198941	0.374791	0.149826	0.555676	-0.307047	0.501946	0.320593	-0.0469475	0.457274	0.604818	0.195783	0.368737	0.340132	0.365456	0.666245	0.574602	0.486984	0.177919	0.273203	0.230532	0.657881	0.581367	-0.420702	0.161447	0.208589	0.0372839	0.687452	-0.439115	0.246333	0.404788	0.474137	-0.0805249	0.614239	0.401346	0.452386	0.448592	0.61693	0.527502	0.481871	0.00856876	0.704685	0.00100374
0.18747	-3.01115	-2.56018	0.143386	-0.310354	0.229123	0.023612	-0.0338349	0.478242	0.156788	0.196737	0.300682	-0.248137	0.113749	0.00966454	-2.27927	0.247805	0.474731	-0.086565	0.151386	-0.261233	-0.783034	0.135568	0.00643539	-2.73346	0.159549	0.287053	-0.0247107	0.381704	0.285192	-0.485631	0.799376	-0.569964	-0.785628	0.604094	-3.60186	0.118548	-0.19728	-0.0280952	-2.84744	0	-2.02265	0.0711546	-0.112451	0.581909	0.0387821	-0.353748	0.191287	-0.492837	0.365018
-0.952635	-0.0259185	-0.79875	-1.38789	-0.359986	-0.896441	-0.908048	-0.356055	-1.62214	-1.14061	-0.932405	-1.16661	-1.63074	-1.75991	-2.34238	-1.20692	-1.81615	-1.64826	-1.07319	-2.77315	-1.18069	-0.68405	-1.20291	-0.926501	-1.23	-1.26396	-0.933476	-0.44459	-1.26127	-0.928369	-1.47424	-1.12502	-1.34944	0.457852	-1.70748	-0.449616	-1.13946	-1.17281	-0.807834	-0.228136	-1.34014	-1.38982	-1.04431	-2.37986	-2.63182	-0.802126	-0.802614	-1.14051	-0.0808315	-0.968277
-0.0194473	0.827082	2.02022	0.10059	2.20115	-0.18203	0.454366	1.17338	0.0218277	0.314868	1.78618	0.0252523	1.54927	0.288806	0.365962	1.98116	-0.17993	-0.407146	1.77555	-0.367719	0.261121	0.228336	0.166575	0.360991	0.907216	-0.327579	0.633444	1.00618	0.00490189	0.767188	0.400342	-0.445959	0.458538	0.781996	0.1943	0.667155	0.782581	0.495857	1.71226	0.86162	-0.13763	0.724844	1.72027	-0.327997	-0.083096	0.430182	0.776212	0.158072	-0.714369	0.736731
0.0541344	-1.55489	-2.65995	0.138697	-0.220713	0.0914927	-0.239837	-0.360017	0.695828	0.481034	0.833475	0.152067	-0.125628	0.500804	-0.633074	-1.86903	-0.259592	-0.341255	-0.947552	-0.41542	0.00329924	-0.0746679	-0.396123	-0.310703	-0.62643	1.26716	1.18427	1.13692	-0.217111	0.0338287	-0.559632	1.72098	-0.385935	0.705121	-0.385198	-1.29285	-1.26341	0.340047	-0.360146	-0.605948	-0.181412	-0.439013	0.226154	0.768994	0.333313	1.03843	0.351697	0.778756	0.130876	-0.228341
-0.254181	-3.40018	-2.4808	-0.269973	-0.58964	-0.081131	-0.365222	-1.42242	-0.460284	-0.91097	-0.974591	-0.990558	-1.03227	0.199563	-2.51721	-2.80437	-0.40422	-0.900483	-2.99216	-1.07687	-0.702106	-1.4842	-0.551347	-0.902522	-0.673431	-0.590205	-0.77287	-0.471075	-0.451294	-0.756791	-2.43562	-0.215909	-0.696747	-0.780137	-0.480257	-2.59158	-1.93601	-0.442871	-0.255831	-0.785297	-0.621458	-0.979598	-0.766964	-0.628265	-0.819855	-0.37657	-1.66244	-1.75985	-1.7592	-0.83166
-1.51328	-2.13676	-2.1811	-1.26944	-1.73669	-1.55849	-1.65023	-1.96973	-0.657726	-1.38887	-2.20527	-1.39803	-2.26482	-1.66419	-1.43231	-2.1963	-1.7899	-1.65493	-1.93916	-0.999225	-1.46529	-2.1743	-1.83737	-1.65182	-1.69892	-1.07326	-1.4886	-1.16246	-1.88308	-1.81845	-3.11407	-1.34879	-1.55982	-1.21715	-1.77503	-2.18425	-2.07637	-0.846163	-1.87925	-2.15616	-1.40967	-1.64774	-1.95956	-1.43037	-0.822912	-1.56518	-1.11275	-2.18971	-2.17497	-1.423
-2.23628	-0.973564	-0.318485	-2.67243	-0.770246	-2.96551	-0.00583744	-0.664619	0.241902	-0.109541	-0.476164	-3.37887	-0.21739	-0.565798	-1.00146	-0.477627	-3.16659	-2.06256	-0.63163	-0.768287	-0.320915	-0.713377	-4.23055	0.434697	-0.841665	-0.395447	-0.388811	-0.0748768	-0.763448	-0.703728	0.000869274	-0.320646	-0.122305	-0.713553	-2.39474	-0.119025	-0.698201	-2.5627	-0.847356	-0.709688	-3.20122	-0.886503	-0.577104	-3.34713	-0.404779	-2.4216	-0.523648	-0.499228	-0.391623	-0.342449
0.611533	-0.178544	0.0356355	0.312451	-0.264617	0.273889	0.234026	0.00538492	-0.0937366	0.0123582	0.00614834	0.286088	-3.22073	0.268457	0.0685215	-0.304518	0.110028	0.173637	0.136437	0.455194	0.19297	0.0777063	0.235418	0.270504	0.0742722	0.227699	0.123321	0.0181932	0.347989	0.269978	-0.382613	0.0593996	0.0716414	-0.115564	0.330292	-0.201494	0.0367594	0.110338	-0.0322027	-0.181364	0.26036	0.0819778	0.112571	0.237283	0.0462384	0.20796	0.082468	-0.140879	0.50856	0.0586581
0.157718	-1.30462	-0.246833	0.397025	-0.0153518	0.571544	0.691945	-0.734341	0.529419	1.31166	-0.0727339	0.539136	-0.523329	-0.647201	0.844833	0.00225925	0.109659	-0.0839038	-0.566082	0.364044	0.995381	0.208601	0.0965452	0.80947	0.807226	0.0645981	0.971032	0.149803	0.349458	0.198247	-0.0440621	0.575023	0.65913	0.641081	0.728076	-0.607029	0.13086	0.992359	0.8025	0.284436	0.93224	1.04441	0.637444	-0.031682	0.89609	0.916522	0.723083	0.133464	-0.60893	0.0689816
-1.87176	-1.95488	-0.866124	-2.35127	-0.973389	-1.18462	-2.12888	-1.30199	-2.66578	-2.35865	-1.17652	-1.90246	-3.05447	-2.44242	-2.49824	-0.277403	-1.72615	-2.55697	-1.5606	-2.70843	-2.62199	-1.93112	-1.28631	-1.68135	-1.6176	-3.45345	-2.02187	-2.00461	-1.10405	-1.1523	-2.02538	-1.8624	-1.73035	-1.37711	-1.39042	-3.42656	-2.28491	-1.59348	-1.4714	-1.51911	-1.60678	-1.79473	-1.57761	-2.51331	-2.2085	-3.21269	-2.96698	-2.07637	-1.60533	-0.984771
-3.01572	-0.491302	-0.481591	-1.11984	-1.06011	-1.03233	-1.50124	-0.679968	-1.1327	-2.14805	-1.17105	-1.2813	-0.685455	-0.964976	-2.14158	-0.706379	-1.49598	-2.25216	-0.756161	-1.4986	-1.21822	-0.119434	-1.66735	-1.43859	-0.757432	-1.27575	-2.24011	-1.00332	-0.881515	-1.05668	-3.48952	-0.812301	-1.24898	-1.5442	-1.17474	-1.32951	0.416961	-0.964906	-1.81802	-0.410603	-1.12561	-2.21467	-3.07132	-1.47587	-1.29917	-1.99245	-0.881381	0.0980082	-2.56559	-2.53784
-1.26152	-1.52065	-0.954165	-1.35298	-0.494734	-1.15332	-1.12538	-1.1838	-1.50912	-1.43842	-1.368	-2.20826	-1.43487	-0.765447	-1.00948	-1.21561	-1.3652	-1.0396	-3.43532	-1.5094	-0.623871	-1.46594	-0.98138	-0.894082	-0.837333	-1.86893	-1.41831	-1.41978	-0.842253	-0.951601	-1.23447	-1.45578	-0.884338	-1.36504	-0.814838	-1.84076	-1.28835	-1.20787	-1.16077	-0.595434	-1.41829	-1.01559	-1.3032	-1.29802	-0.837852	-0.995824	-0.923577	-0.860413	-1.70427	-1.14189
-1.11786	-0.338495	-0.142422	-1.21849	-0.452674	-0.988363	-0.97802	-0.116168	-0.782488	-0.889091	-0.618097	-1.25836	-0.906426	-1.12944	-1.24282	-0.323462	-1.14214	-2.50096	-0.878334	-1.14701	-0.786459	-0.915208	-0.941124	-0.919367	-0.964647	-1.05576	-0.908005	-0.575931	-1.64152	-0.902424	-0.551782	-0.985195	-0.920238	-0.807432	-1.12534	-0.14835	-1.20777	-0.738116	-0.75801	-0.85187	-1.15837	-1.09403	-0.868549	-3.26667	-1.43512	-1.08785	-0.915729	-0.926671	-1.16921	-1.10883
-1.40393	-1.12944	0.290578	-1.82648	0.44911	-1.63265	-1.42906	-0.0059247	-2.42429	-1.16406	0.14951	-2.208	-0.798108	-1.0486	-1.03221	1.39232	-3.14117	-2.76759	-0.532121	-1.37568	-1.10872	-1.46598	-1.1632	-1.53891	-1.06177	-3.72288	-0.464237	0.255186	-1.5785	-0.172946	-2.57785	-1.44163	-1.16861	-0.86744	-1.19965	-1.48323	-1.6524	-1.30989	-0.2618	-1.10741	-1.81267	-1.30642	0.510829	-1.77703	-1.56537	-1.50409	-0.625464	-0.916887	-3.41435	-0.946057
1.9588	0.911178	-0.876392	2.09189	1.19224	1.9017	2.01298	0.767728	1.69939	1.83402	1.8113	1.62582	1.35294	1.77633	1.27346	0.0336084	1.83114	1.55885	0.935114	1.50992	1.9169	1.29559	1.77703	1.73379	1.6682	1.72258	1.42478	1.49502	1.97276	1.71975	1.16484	1.84734	1.78293	1.41696	2.33277	0.461878	1.03026	2.37089	2.09856	1.30916	1.80229	1.99257	1.80472	1.61294	1.84117	2.0826	1.3916	1.67415	0.505045	1.27624
2.05171	2.62109	1.32649	1.82555	2.33766	1.88048	2.06186	2.53	1.25927	1.73582	1.82367	1.89667	1.12967	1.85963	1.68564	2.14403	1.55367	1.47782	2.37355	1.2818	2.15402	2.43065	1.79214	2.24121	2.15058	2.07335	2.22787	2.37792	1.80062	2.19352	1.73481	1.81537	2.13252	2.57577	1.80116	2.12698	2.41868	1.88168	2.23151	2.6294	2.06894	2.11877	2.26321	1.51831	1.42756	2.12794	2.08053	2.52889	2.35996	1.77112
-0.684069	-0.118062	0.390166	-0.585178	0.0210824	-0.605154	-0.140765	0.0179658	-0.903503	-0.357744	-0.630704	-0.663705	-0.80313	-0.502568	-0.60059	0.248026	-1.01854	-1.39336	-0.53632	-1.60723	-0.516304	-0.201534	-0.712232	-0.388441	-0.324812	-0.784599	-0.531424	0.205092	-0.24216	-0.535785	-0.0401187	-0.894692	-0.4473	0.19794	-1.09428	-0.434745	-0.174478	-0.60106	0.026886	-0.360429	0.0683479	-0.741966	-0.648954	-1.33948	-1.31052	-0.669722	-0.524733	-0.55015	0.0817499	-0.340671
-0.945722	-1.50436	-2.10252	-0.995692	-1.52247	-0.673347	-0.927444	-1.57344	-1.01632	-1.17309	-2.06379	-1.19263	-2.47965	-1.30238	-2.82032	-2.49363	-1.39957	-1.03758	-2.38186	-1.07566	-2.89323	-1.64494	-1.30906	-1.17014	-1.47337	-1.38632	-1.0445	-0.97203	-0.864198	-1.23643	-2.23525	-1.23931	-1.44752	-0.954502	-1.35791	-1.64232	-1.33257	-0.805895	-1.39907	-1.70278	-1.15728	-1.40871	-1.47722	-1.45246	-0.85887	-0.961387	-1.16627	-1.8593	-2.41194	-2.68402
0.464914	2.17483	1.24103	0.357997	0.978849	0.144793	0.531317	1.81212	0.0430756	0.512937	0.453793	0.638704	0.00328732	0.477038	0.604093	2.3421	0.107015	0.115188	1.83516	-0.0747433	0.64271	1.28818	0.348888	0.570866	0.273889	1.06844	1.28533	1.37501	0.623868	0.769078	0.669111	0.730298	0.8364	0.940009	0.471446	1.05604	1.81531	0.514063	0.577278	1.44448	0.363918	0.844131	0.579251	-0.0428238	0.255157	0.432821	1.15491	1.26589	0.776074	1.01299
-2.17387	-0.918958	1.07018	-1.7459	-1.09071	-3.25676	-2.31055	-0.0843253	-3.75577	-1.47725	-1.00953	-2.76026	-1.37733	-3.44569	-1.40448	-0.00525284	-1.77778	-2.86718	-3.27326	-2.85961	-1.64731	-3.06445	-0.426987	-1.41205	-1.47712	-3.22691	-1.72136	-0.964456	-2.79566	-1.58744	-3.63007	-2.52846	-1.68035	-1.33064	-3.57657	-2.86802	-2.90928	-2.59706	-1.04813	-1.12089	-2.99066	-1.20674	-1.2875	-3.45882	-2.77701	-1.5161	-1.05244	-1.51265	-2.66099	-1.67129
-0.285602	0.0796151	0.626709	-0.393195	0.671188	-0.503504	-0.127484	0.413136	-0.722594	-0.15918	0.496791	-0.572414	-0.139353	0.0123525	-0.123676	0.584092	-0.242929	-0.239724	0.155754	-0.247561	-0.195441	-0.030508	-0.058301	-0.123878	-0.0318594	-0.455066	0.142598	0.322268	-0.249842	0.266624	0.206717	-0.393054	-0.0731673	0.597448	-0.160731	-0.410507	-0.0666142	-0.165534	0.143461	0.0777373	-0.054287	-0.141508	0.763595	-0.406393	-0.500865	-0.208757	-0.0163727	-0.0358963	1.09357	0.240096
1.95098	2.00164	1.26091	2.04981	2.17728	2.21884	2.48129	2.05568	1.94778	1.93802	2.05991	1.84532	1.36719	2.00078	1.10914	2.15613	1.79639	1.83923	2.30938	1.10887	1.64444	2.89985	2.04696	2.05482	2.07025	2.02958	2.09009	2.32996	2.20065	2.04582	1.57818	2.03	2.02916	2.46187	2.34223	0.839945	2.88912	2.13123	2.15638	2.50856	2.18243	2.10001	1.93161	1.91075	2.1487	2.21104	2.33163	3.01134	1.59529	1.58648
-1.32153	0.531182	-0.647209	-0.775077	-0.603691	-2.81993	-3.60909	-0.53512	-0.0399008	-0.13761	-0.14347	-0.961407	-0.565885	-0.474005	-2.86813	-2.63698	-0.955292	-1.11948	0.86022	-0.359501	-0.189699	1.38694	-0.845245	-0.69747	-1.84461	-0.640648	-1.0921	-0.536049	-2.99171	-1.89596	-0.918559	0.17807	-2.27691	-0.663371	-1.35928	-0.965258	0.958559	-0.194665	-2.5226	-0.31637	-3.23317	-3.07244	-1.90614	-0.578525	-1.14514	-1.02324	-0.118079	0.9457	-1.95036	-2.42442
-1.43515	-2.44871	-2.49083	-1.54475	-1.92485	-1.7132	-1.68118	-2.62303	-1.48496	-1.50873	-1.88118	-0.95435	-2.07112	-2.22078	-2.88218	-2.01827	-1.49177	-1.69539	-3.36543	-1.79598	-2.24038	-2.19206	-1.70281	-1.93126	-1.58769	-1.08863	-1.12741	-1.78992	-1.77381	-1.8058	-2.45457	-1.07766	-1.64262	-1.63834	-2.26572	-2.04081	-2.57945	-1.26925	-1.61789	-2.19561	-1.7101	-1.70145	-1.95406	-1.57421	-1.32458	-1.49014	-1.69664	-1.61431	-2.43624	-1.73528
-2.50533	-0.458486	1.56029	-3.41977	-0.191002	-2.96	-3.00928	-0.327599	-0.0319757	-0.138934	-0.155222	-2.79993	-1.85607	-0.348947	-2.50116	0.150661	0.327758	0.187128	-0.285163	-2.08627	-0.38589	-0.54726	-0.0917835	-0.92433	-0.188216	-0.172149	-0.534615	-0.336784	-2.43302	-0.726171	-2.50599	-3.01124	-0.727831	-0.295903	-1.01951	-2.79527	-3.90658	-0.398309	-0.656862	-0.301043	-0.225453	-0.689719	-0.232401	-2.35001	0.0112853	-3.05707	-0.720718	-2.19404	-0.721186	-0.654782
1.17049	2.30397	1.18417	1.07179	2.01032	1.25666	1.43777	1.85337	0.812778	1.12595	1.34692	1.49963	0.748068	1.11118	1.06774	1.79353	1.06445	1.03557	1.65101	0.798173	1.22162	1.70665	1.04171	1.40209	1.18428	1.57502	1.7087	1.74884	1.23974	1.52555	0.976534	1.39172	1.35393	1.75222	1.26649	1.39252	2.29245	1.19847	1.89439	2.56589	1.5755	1.61511	1.66369	1.08279	1.27248	1.74294	1.75529	2.09544	1.76027	1.03277
9.32172	8.12481	7.97565	9.12431	8.68275	9.22398	9.24512	8.53875	8.41484	8.81717	8.7736	9.07147	8.44089	9.21072	8.78778	8.59578	9.02453	9.02992	8.5133	8.59172	9.1468	8.8097	8.86603	9.07511	8.96787	8.98816	9.00413	9.13202	8.95475	8.82732	7.8274	9.03559	8.74818	9.01361	9.25855	7.84085	8.37619	9.40257	9.39239	8.83168	9.39472	9.1261	9.14173	8.91897	8.93517	9.35222	8.76717	8.21859	8.9225	8.83728
-1.1783	-0.306956	-0.111579	-0.939389	-0.152879	-1.08061	-0.676916	-0.420372	0.151383	-1.0919	-0.283854	-0.287916	0.191467	-0.301896	-2.75407	-0.618929	-1.27102	-0.354225	-0.3848	-0.814687	-3.06664	-0.656752	-2.80773	-0.968554	-0.361594	-0.566923	-0.585668	-0.521916	-0.748214	-0.553587	-0.815436	-0.732432	-0.860219	-0.52774	-1.56619	-0.461782	-0.604764	-0.933006	-0.657747	-1.01353	-0.638206	-0.796247	-0.693807	-0.775303	-0.471448	-0.484269	-0.601826	-0.34654	-0.16698	-0.286832
0.861897	0.956947	2.06375	0.409875	0.903833	0.74735	0.706535	1.237	0.391292	0.258974	0.622581	0.788872	0.38405	0.696899	0.606701	0.924891	0.593932	0.809351	1.12795	0.581134	0.65224	1.1198	0.594028	0.812085	0.693663	0.548154	0.767448	0.94961	0.678219	0.959947	-0.141407	0.624189	0.707521	1.37947	0.914557	1.33275	1.32702	0.685477	1.06546	1.10826	0.929695	1.03205	1.01772	0.689642	0.470233	0.897926	1.35503	0.709711	1.35021	0.900981
0.173393	1.0498	0.857266	0.180909	0.525975	0.185565	0.286064	0.824025	-0.183363	0.160348	0.165871	0.00121021	0.00874329	-0.217119	0.102009	0.408634	-0.0517521	-0.0153394	0.377713	-0.063282	0.157346	0.47355	0.0407457	0.3014	0.250868	0.332622	0.447097	0.666018	0.232147	0.354114	-0.0657048	0.278298	0.444295	1.02252	0.271941	0.725231	0.870475	0.0970187	0.455149	0.828373	0.166908	0.230486	0.281313	-0.475657	-0.27353	0.349666	0.33814	0.705585	1.19295	0.480811
0.617826	-0.046433	-0.784946	0.344952	-0.0806966	0.467725	0.139063	-0.141353	-0.354556	-0.0458817	0.0755939	0.152895	-0.947605	-0.129095	0.0372086	-0.150023	-0.0339012	0.191953	0.0504751	0.140181	0.0568948	-0.0927725	0.0253649	0.230751	0.165128	-0.232393	0.0383129	-0.0708666	0.207032	0.299505	-0.827505	0.00137138	0.252204	-0.178662	0.397825	-0.265355	0.23566	-0.00546885	0.173796	-0.151463	0.238258	0.217671	0.296264	0.015974	0.0604453	0.284748	0.184018	0.0548744	-0.0692825	-0.0333695
-0.277618	-0.185353	-0.125857	-0.787783	-0.267639	-0.764624	-0.513242	-0.311659	-0.644471	-0.528285	-0.344554	-0.356527	-0.67787	-0.278057	-0.790817	-0.407123	-0.540598	-0.393953	-0.0828152	-0.562086	-0.406401	-0.204689	-0.597399	-0.313667	-0.427155	-0.701543	-0.732161	-0.81072	-0.395751	-0.223009	-0.552341	-0.477998	-0.620854	-0.0622749	-0.364897	-0.611964	0.0362263	-0.51106	-0.416007	-0.114873	-0.350788	-0.492471	-0.0574894	-0.472445	-0.322918	-0.345456	-0.126277	-0.351013	0.29575	-0.567074
-0.428073	-1.85648	-2.44522	-0.771802	-1.19175	-0.820278	-1.12171	-3.7663	-1.39395	-0.286041	-1.06942	-1.21583	-3.44668	-0.621902	-1.2686	-1.58929	-1.84747	-0.924794	-3.13597	-0.636657	-1.8363	-1.52377	-0.805393	-1.37966	-3.5238	-1.12902	-1.52706	-1.95774	-0.562373	-0.57964	-3.4792	-1.07326	0.328043	-1.08822	-0.542912	-1.48956	-1.94222	-0.954478	-0.851684	-1.95255	-1.05828	-1.07521	-1.42638	-1.27876	-1.04662	-1.00269	-1.35992	-1.74466	-1.39346	-1.51163
0.317806	-1.26226	-0.67591	-3.25344	-0.7264	0.008008	-0.084815	-0.730657	-1.965	0.30811	-2.3356	-0.0819197	-2.86791	-0.237805	-0.11646	-2.92546	-2.82521	-2.41835	-3.00983	-3.46469	-0.0803714	-0.266788	1.09976	-0.0394888	-0.307671	-0.366076	-0.432729	-2.46042	0.354059	0.0626593	-3.8607	-0.260629	-0.0635457	-0.710313	0.106665	-0.319746	-2.28196	0.669446	-0.22821	-0.77937	-0.102845	0.0819473	-0.367296	0.588635	0.502459	-0.248904	-0.470722	-0.788936	-0.613376	-0.12425
0.0927105	0.481889	-0.107438	0.0793324	0.321854	0.00275517	0.212167	0.680221	-0.00403118	-0.02214	0.31626	0.0183353	0.096467	0.13792	-0.670414	0.746957	0.140631	0.065187	0.259277	-3.32198	0.0295634	0.270671	0.235489	0.156617	-0.233119	-0.42949	-0.208391	0.29507	0	0.264012	0.597709	-0.0482693	0.377727	0.313387	0.13995	-0.0352077	0.512877	0.337155	0.159891	0.253195	0.207437	0.197206	0.0534859	-0.00942135	-0.20379	0.0668344	0.145522	0.910649	0.191888	0.29218
-1.31771	-1.27047	-0.74119	-1.50231	-0.743597	-1.28757	-1.40619	-0.786664	-1.39852	-1.26254	-0.594576	-1.07087	-1.15767	-1.86457	-1.68514	-0.231313	-3.31518	-2.0652	-1.06235	-2.40186	-1.47737	-1.11802	-1.05946	-1.2807	-0.877901	-1.80519	-1.22692	-0.949225	-1.34987	-1.21596	-3.78934	-1.43761	-0.954319	-1.077	-1.51675	-1.2973	-1.05338	-1.61444	-1.0175	-1.30667	-1.56931	-1.2332	-0.818845	-3.03346	-1.49092	-1.28797	-1.09217	-1.33127	-1.34722	-1.06601
3.63101	4.48751	4.60467	3.96651	4.27909	3.71249	3.95644	4.47446	4.07306	3.54602	4.57282	4.2027	4.08005	4.21142	3.61202	4.06661	3.47413	3.33168	3.98172	3.09592	3.82047	3.66788	3.50226	3.73108	3.82765	4.92366	4.6434	4.61428	3.18171	3.60112	3.53266	4.76315	3.8111	4.3086	3.60667	3.60531	3.93836	3.92365	4.11302	4.39993	3.73941	3.95606	4.27001	3.66755	3.5501	4.21365	4.16204	4.7851	3.62608	3.91806
-1.02966	-1.14156	-1.53093	-0.656849	-1.74919	-1.37824	-1.59286	-1.28851	-0.806172	-2.22792	-1.51785	-1.17534	-3.15403	-1.14331	-2.79076	-1.57417	-2.3589	-2.82472	-2.55533	-2.49379	-2.94776	-2.41903	-0.817112	-2.24348	-2.55213	-0.763107	-1.15745	-1.03319	-1.26114	-1.69385	-3.41442	-0.480291	-1.48406	-2.22191	-1.57207	-2.43238	-1.89055	-1.18002	-2.84847	-1.78485	-1.10553	-2.56762	-0.664382	-3.56693	-2.98449	-1.96614	-1.46116	-0.897719	-1.64393	-2.94164
0.0735283	-0.426754	-1.42399	-0.17129	-0.203987	-0.125731	-0.15357	-0.533877	-0.236416	-0.103359	-0.187431	0.0609589	-0.616375	0.0170407	-0.215755	-0.327538	-0.351333	-0.218757	-0.501441	-0.471948	-0.459193	-0.368321	-0.0397072	-0.323908	-0.6998	0.317389	0.0680361	0.1083	0.0297422	-0.0140142	-0.469813	0.183316	-0.399014	-0.150895	-0.124206	-0.572654	-0.370657	-0.0697255	-0.402342	-0.445768	-0.0383682	-0.253369	-0.153646	-0.104571	-0.214995	-0.00899696	-0.388013	0.0297775	0.0298271	-0.356272
3.74025	3.08076	4.06375	3.69494	3.67207	3.53935	3.57209	3.00765	3.46087	3.63365	3.42204	3.63739	3.32718	3.43304	3.08281	2.85868	3.49432	3.39465	2.52988	3.1895	3.14244	2.96856	3.82568	3.52703	3.70552	3.59493	3.60065	3.43029	3.34647	3.49321	3.43664	3.70647	3.41676	3.32635	3.62281	2.6141	2.88657	3.74124	3.79399	3.32971	3.49767	3.59297	3.55778	3.30772	3.29317	3.69675	3.23241	3.39056	2.80617	3.18252
-1.10614	-0.297333	-1.75488	-1.22547	-0.601826	-0.917776	-0.723504	-0.552845	-1.3737	-1.04051	-0.535065	-0.618703	-2.1087	-0.698669	-1.03543	-1.07108	-0.873896	-1.24617	-0.524286	-1.33109	-0.757044	-0.631307	-1.12183	-0.910102	-1.42502	-1.30501	-1.25639	-0.910419	-0.757258	-0.780372	-0.132019	-1.25889	-0.973275	-0.86887	-1.2468	-0.0799694	-0.574071	-1.20999	-0.840316	-0.689115	-0.920041	-0.857525	-0.749218	-0.853336	-0.883639	-0.620402	-0.435002	-0.798239	-0.527486	-1.36588
-0.532302	-1.08416	-1.49962	-0.90755	-1.40994	-0.727542	-1.00041	-1.49788	-1.10349	-1.01739	-1.57965	-0.866766	-2.99745	-0.903888	-0.830689	-2.61186	-1.07839	-1.32264	-1.45414	-0.803773	-0.743894	-0.832827	-0.671589	-0.596561	-0.9464	-0.743003	-0.626277	-1.15198	-0.455639	-0.711714	-1.19276	-0.743271	-1.02914	-0.966476	-0.583107	-0.794261	-0.796595	-0.701787	-1.31653	-1.06434	-0.681119	-0.80243	-1.16075	-0.808312	-0.664518	-0.567084	-0.752149	-0.755211	-0.972939	-0.612639
0.689993	-0.620182	-1.27564	0.495027	-0.173817	0.43257	0.126801	-0.341141	-0.012476	0.110114	-0.395828	0.225769	-0.431846	-0.0897317	0.385861	-2.60628	0.180691	0.28031	-0.19894	0.19357	0.246385	-0.170464	0.157014	0.134763	0.231722	-0.0725794	-0.049675	-0.173736	0.37438	0.239861	-0.176538	0.0901232	0.0169883	-0.571203	0.561157	-0.555392	-0.109748	0.241101	0.00292015	-0.482568	0.273291	0.121815	0.0847168	0.0722971	0.25415	0.575802	0.111964	-0.354891	-0.209159	0.0538135
-1.444	-2.14942	-2.45591	-0.803887	-1.44623	-0.883822	-1.06116	-1.56941	-0.714676	-1.24655	-0.742155	-0.593208	-1.05283	-0.934469	-0.761248	-2.87938	-1.07323	-0.815727	-1.14089	-0.779378	-0.810237	-0.827154	-0.977414	-1.21872	-1.47116	-0.0820637	-0.411644	-0.627959	-1.07039	-0.997133	-1.45563	0.145999	-1.09072	-1.18589	-0.827648	-2.67642	-1.1064	-0.920053	-1.0619	-1.65001	-1.06262	-1.14018	-0.758098	-0.876906	-1.17535	-0.512695	-1.26924	-1.13875	-2.08168	-1.14021
0.268758	0.217626	1.01621	0.105979	0.417328	0.241656	0.28005	0.558459	-0.00860119	0.11981	0.0783415	0.251686	0.275318	0.158669	0.26978	0.75293	-0.00775814	0.0303912	0.283283	0.151267	0.381389	0.418446	0.281832	0.350371	0.209675	0.226124	0.331162	0.514427	0.336443	0.485516	-0.0252614	0.0969553	0.307918	0.278246	0.131644	-0.000512123	0.361865	0.110338	0.334794	0.358358	0.215465	0.304603	0.288817	0.0571518	0.0771642	0.151496	0.275098	0.184801	0.263497	0.0727754
-0.0218086	-0.230965	1.01679	-2.60363	0.0364928	-2.87688	0.80757	0.386895	-0.0753908	-0.393034	0.485262	-0.751453	-0.534969	0.0778728	-1.06221	-1.08497	-2.88755	-2.34472	-1.41614	0.567325	-0.30942	-2.82677	1.14301	0.648123	-2.38812	-1.06141	-2.56858	-1.34291	-3.16337	0.454411	-3.54896	-3.69615	-3.25734	2.68232	-3.55576	0.517649	0.108634	-0.090488	-2.61171	-0.146468	-2.7226	-2.63944	-2.05131	-1.81818	1.53041	0.613633	0.613351	-0.859204	-1.82544	-0.131801
-1.88259	-0.914258	-0.914286	-3.10157	-1.78804	-2.07731	-1.34547	-1.42603	-2.67103	-1.80661	-1.37273	-1.6983	-2.13165	-2.07821	-1.6414	-1.34323	-2.03697	-1.33233	-1.42216	-1.60416	-1.45313	-1.55431	-2.4461	-1.6985	-1.66989	-1.85475	-1.40922	-1.6954	-1.53582	-1.56634	-3.4098	-1.83418	-1.74202	-1.42866	-2.01346	-1.17419	-1.16941	-1.48527	-1.7202	-1.29831	-1.62945	-1.3449	-1.91429	-3.45341	-3.40036	-1.9441	-1.5613	-1.40187	-1.21767	-1.45875
-0.586292	-0.294958	1.80262	0.147504	0.367507	0.521523	1.09204	-0.0570979	0.0419779	1.74131	0.229763	0.213808	0.579094	-0.633288	-0.591377	0.210967	-0.229882	-0.178713	0.173841	-0.240694	0.0115342	1.71562	1.1976	-0.032692	0.622684	-0.0126009	0.22706	-0.164433	-0.322761	-0.572113	3.4883	-0.197198	0.722499	1.74223	-0.00693655	0.421015	0.0868292	0.400775	0.374806	0.260317	0.000276566	0.0511408	-0.385104	-0.126653	0.150165	0.0336952	0.575765	1.1009	0.0307961	-0.00549841
-0.756233	-0.701592	-1.0368	-0.793664	-0.643466	-0.615396	-0.69577	-0.658154	-1.11521	-0.821107	-0.643814	-0.885566	-1.30896	-0.904717	-1.51616	-0.674106	-0.968801	-1.00857	-0.749318	-1.47716	-1.03814	-0.703099	-1.04763	-0.656268	-1.00116	-0.619236	-0.661199	-0.396162	-0.672276	-0.792601	-1.07923	-0.501349	-0.914194	-0.0357904	-0.720371	-0.857632	-0.374506	-0.857957	-0.898193	-0.583076	-0.837443	-0.932456	-0.876784	-0.983404	-0.58844	-0.772152	-0.826742	-0.503616	-0.100821	-1.19721
2.2445	2.12921	2.29113	2.29941	1.62399	2.20894	2.07861	2.03873	1.76928	2.05396	1.75148	1.86064	0.776911	1.87541	1.50724	1.50184	2.08372	2.23807	1.45382	1.56949	1.69849	1.69702	1.94073	1.91547	1.53962	2.20935	1.8869	1.91288	2.16901	2.02178	1.00044	2.04143	1.74093	1.87882	2.1512	3.09156	1.3457	1.84182	1.78391	1.71292	1.95257	2.31109	1.96274	1.77021	1.747	2.07886	1.86055	1.22708	2.4682	2.36792
-2.76574	0.0347018	2.86041	-1.48953	-0.696689	-0.372784	1.43426	0.496343	-0.692702	-0.96522	-0.540255	-0.821111	-0.817511	-0.593983	-2.81875	-0.827963	-0.154034	-2.75843	-0.842317	-2.27718	-3.07699	-1.30261	-2.40228	1.30522	-1.07947	-0.611908	-1.19862	-0.461181	-3.12566	-2.44605	-2.66199	-0.871698	-2.94049	-0.425941	-0.739534	-0.544204	-0.695759	-1.32906	-2.67557	0.0415444	-0.562821	-0.860807	-2.52596	-0.903126	-2.76079	-1.27581	-0.889753	1.60894	-0.761266	-1.25873
0.361192	1.30883	1.75225	0.0656462	1.59873	0.278975	0.466486	1.66349	0.129714	0.389551	1.04042	0.0579653	0.469516	0.535223	0.273277	1.74924	-0.000597954	0.165728	0.86001	-0.0854387	0.781133	0.5819	0.11928	0.597321	0.750227	0.613258	0.730124	1.27613	0.434938	0.903369	0.705163	0.650464	0.785179	1.615	0.338198	0.847295	0.773793	0.169723	0.891084	1.01123	0.259593	0.513577	0.76632	-0.0301256	0.180822	0.813179	1.05448	1.27706	1.08055	0.721293
1.63992	1.81832	2.44379	1.6698	2.25592	1.71585	1.73341	1.80326	1.36486	1.38888	2.11479	1.74188	1.59647	1.53929	1.37381	2.35316	1.27665	1.20673	1.67363	1.13645	1.50712	1.69306	1.36746	1.7049	1.49092	1.82282	1.93051	2.11851	1.41686	1.85859	1.14501	1.96638	1.55124	2.14904	1.40222	1.37677	1.77828	1.704	1.86699	1.83908	1.92265	1.80127	1.9887	1.44174	1.54059	1.6758	1.68653	1.95729	1.89624	1.6752
-1.54998	-0.404102	-0.0933747	-1.68787	-0.660339	-1.6731	-1.2609	-0.80653	-1.85244	-1.98609	-1.73738	-1.09109	-1.49032	-1.661	-1.35334	-0.352493	-1.83655	-1.36605	-1.06615	-1.7344	-0.982359	-0.674356	-1.53373	-0.915099	-1.39464	-1.46461	-1.19197	-0.780338	-1.79187	-1.20249	-1.35063	-1.57829	-1.07343	-1.13653	-1.42417	-1.39383	-0.647196	-1.78447	-0.544767	-0.329765	-1.58653	-1.14345	-0.98772	-1.3657	-1.79143	-1.39327	-0.810499	-1.55228	-1.01216	-2.09726
4.61976	3.68122	3.07789	4.53377	4.31076	4.64318	4.55414	4.08199	3.73244	4.14039	3.83299	4.53568	3.23643	4.34823	4.46044	4.19082	3.87156	4.20165	4.0726	3.98398	4.4273	4.45505	4.10366	4.32083	4.26191	4.44144	4.5528	4.11135	3.87697	4.09145	3.59801	4.273	3.99539	4.00737	4.26554	3.7757	3.42549	4.36141	4.60042	4.21363	4.93003	4.54857	4.45877	4.43075	4.20465	4.75323	4.24332	3.60028	4.76376	4.18362
3.37374	2.44718	2.86882	4.06229	3.78108	4.36963	4.3445	3.57745	4.09493	3.89316	4.22206	3.93205	3.69828	3.83383	2.96816	3.19777	3.63279	3.35201	3.20474	2.63028	3.60907	3.75925	3.53052	3.69641	3.87788	4.56447	4.46849	4.66533	3.4903	3.53601	2.91245	4.60844	3.50741	4.28233	3.49878	2.45321	3.21777	4.09357	4.07243	3.54897	3.94877	3.70315	3.57878	3.83382	3.72203	4.243	3.72695	4.29696	3.09885	3.45439
-0.604511	-1.17002	-1.66274	-0.850147	-0.977539	-0.878794	-0.987456	-1.29474	-1.31929	-1.0373	-0.889896	-0.593255	-1.28135	-0.91716	-0.695846	-1.29516	-0.930256	-0.831302	-0.983193	-0.793113	-1.12825	-1.00363	-0.834364	-0.829992	-0.859365	-0.898307	-0.849455	-0.931924	-0.820239	-0.743825	-1.00571	-0.993434	-0.92873	-1.04307	-0.647016	-1.16902	-0.892402	-0.858353	-0.868882	-0.963473	-0.916493	-0.874884	-0.732447	-0.75097	-0.674555	-0.781199	-0.67946	-0.816902	-0.2605	-1.04849
-0.0431747	-0.344076	-0.263487	-2.12906	-0.0404296	-0.751469	-0.400652	-0.0761533	-0.655804	-0.676668	-0.801458	-0.429371	-0.610573	-2.39305	-1.08129	-0.433422	-1.42953	-0.387072	-0.728436	-0.663346	-0.958996	-0.385819	-0.952246	-0.653224	-0.496258	-0.260171	0.0334816	-0.315896	-2.46265	-0.338108	-1.00355	-0.223848	-0.35417	-0.281814	-0.541769	-0.940477	-2.7734	-0.673641	-0.0658398	-0.116883	-0.95171	-0.223693	-0.416102	-3.96518	-0.822693	-0.473686	-0.489827	-0.261422	-0.561214	-0.346135
-1.81558	-2.2645	-3.0537	-1.77252	-1.72139	-1.7368	-1.58028	-2.76367	-1.42051	-3.06239	-2.85809	-1.36821	-3.59862	-2.55212	-3.23186	-2.95745	-2.17761	-3.67568	-2.74514	-1.64177	-2.90982	-2.78806	-3.02549	-1.86912	-3.0636	-2.04299	-1.76246	-2.32584	-1.67542	-2.79867	-2.07725	-1.34064	-1.3676	-2.50337	-1.79706	-3.84973	-2.41417	-1.61103	-2.26748	-2.48447	-1.47077	-2.02972	-2.7524	-1.73722	-1.66882	-1.8327	-2.2938	-1.71078	-1.4376	-1.4622
1.89567	2.38052	1.58151	1.78556	2.24921	1.83313	1.79677	2.14994	1.56223	1.77481	1.71293	1.93958	1.37607	1.61891	1.83024	2.28723	1.42848	1.77933	1.78593	1.74228	1.65137	2.10922	1.65879	1.90956	1.92732	2.13376	2.28428	2.40035	1.85081	2.10347	1.37894	1.98139	1.87744	2.03566	1.75019	1.22088	2.19041	1.65924	2.34543	2.67765	1.82992	2.28587	2.27449	1.57381	2.01632	2.06835	1.79295	2.17794	1.90487	1.7795
1.18733	0.516091	-0.386162	1.24496	0.944933	1.33131	1.11845	0.738933	1.02944	1.26436	1.12648	1.06762	0.69438	0.85874	0.619619	0.708179	1.21598	1.29126	0.669971	1.37597	1.09244	0.534095	1.06268	1.0878	1.00558	1.45026	1.25795	1.35586	1.20862	1.13688	0.333243	1.43945	0.771819	0.665172	1.11473	0.246874	0.554953	1.4038	0.962247	0.823282	1.28995	1.10394	1.09944	1.12732	1.28562	1.36205	0.943225	0.830821	0.0596743	0.825995
-0.316022	-0.123156	0.337395	-0.0331039	0.735485	-0.176727	0.0945396	0.300823	0.108707	0.00273752	0.658051	-0.318087	0.140629	-0.0956721	-2.1092	0.775702	-0.0667229	-0.318763	0.0693493	-0.401104	-0.175521	-0.135017	-0.0565424	-0.266838	0.0305519	-0.48809	-0.0520449	0.214604	-0.211226	0.310061	-0.119986	-0.0178452	-0.0185666	0.355671	0.0326095	-0.11878	-0.273234	-0.0775371	0.372174	0.184536	-0.158626	0.092104	0.367699	0.19329	0.234077	-0.071847	0.0918617	0.127983	-0.0157452	0.0375104
1.40899	0.245756	-1.19445	1.35242	0.576133	1.17384	1.21007	-0.0143209	0.276411	0.412798	0.494319	0.599331	0.064189	0.821917	0.227595	-0.472654	0.838619	0.828245	0.0783615	0.347709	0.775495	0.503695	0.861472	0.999382	0.846399	0.391105	0.507143	0.349656	0.798606	0.953493	-0.0022912	0.560534	0.647734	0.464933	1.0327	-0.514841	0.120542	1.01401	0.867554	0.218954	1.15957	0.787095	0.793756	0.568814	0.586746	0.892661	0.0730343	0.163851	1.09165	0.56737
0.965888	-0.191009	0.334412	1.10742	0.210381	1.04495	0.810989	0.0566373	0.246736	0.503891	-0.334725	-0.0362377	-0.531417	0.306053	-0.277455	-0.508834	0.726481	1.00644	-0.126256	0.773923	0.415386	-0.0368767	0.980558	0.572472	0.47651	0.122151	-0.0178957	0.294907	1.14048	0.754371	-0.392061	0.259915	0.329119	0.0447683	1.11491	-0.475389	0.0583153	0.74093	0.675299	0.00698709	0.631034	0.744334	0.418494	0.463404	0.748206	0.734822	-0.137854	-0.388681	0.559162	0.498767
-1.79171	-2.15735	-1.11743	-2.07555	-1.4629	-1.42147	-1.06546	-1.47389	-3.53022	-1.83632	-1.90933	-1.73167	-3.15773	-1.58529	-2.72604	-1.40197	-2.46653	-3.17482	-1.44874	-2.43157	-3.31644	-1.4363	-1.10367	-1.51354	-1.27943	-2.11416	-1.6511	-1.75419	-3.37569	-1.65914	-1.26691	-1.73483	-1.332	-0.936268	-1.74724	0.288523	-1.28152	-1.53742	-1.4464	-1.26323	-1.39896	-1.03751	-1.37463	-2.86949	-1.6827	-1.46154	-1.43218	-1.85398	-0.754091	-1.21554
-0.37298	-1.04519	-0.894391	-0.510754	-0.666377	-0.574293	-0.602787	-0.843151	-0.699503	-0.870239	-0.729071	-0.784059	-0.862992	-0.434426	-1.5181	-1.02212	-0.480655	-0.364797	-0.948639	-1.02076	-0.891451	-0.447036	-0.862991	-0.691807	-0.961126	-0.986147	-1.12309	-0.964186	-0.612977	-0.599637	-3.32574	-0.51581	-0.645359	-1.05153	-0.731361	-0.715831	-1.02351	-0.784592	-0.898211	-1.17639	-0.476344	-0.489719	-1.08556	-0.835709	-0.920204	-0.811476	-1.05654	-1.15191	-1.34539	-0.985265
3.2983	2.08004	1.50068	3.26252	2.22461	3.43072	3.40662	2.2574	2.76543	3.23343	2.35182	2.94135	1.58637	3.03376	2.1569	1.7016	3.18879	3.09957	2.28631	2.38507	2.77992	2.46712	3.00441	3.14682	2.71159	2.92746	2.91011	2.86083	3.16105	3.15058	2.27111	3.05081	2.8376	2.81033	3.38235	1.84893	2.34692	3.28896	3.21241	2.66263	3.25349	3.03159	2.60055	3.08986	2.99259	3.48403	2.63264	2.28224	2.68738	2.6251
0.54008	1.34559	0.59529	0.356945	0.866859	0.400423	0.509995	1.03996	0.427286	0.464254	0.656373	0.721571	0.254419	0.48582	0.34869	1.01198	0.336626	0.179871	0.719854	0.252393	0.624524	0.813403	0.488215	0.711473	0.615988	0.933543	0.917439	1.12694	0.446136	0.846292	0.330866	0.998847	0.679629	1.06264	0.550395	0.691757	1.20963	0.663075	0.836848	1.10106	0.578196	0.701289	0.90496	-0.0619736	0.250797	0.716038	0.977033	1.15262	0.968512	0.500894
-0.664085	-1.39192	0.000295162	-3.09048	-0.309639	-3.4378	-1.64002	-0.771303	-3.0042	-1.12577	-0.733137	-1.63306	-0.605485	-2.26941	-0.613244	0.226041	-2.4257	-3.42234	-1.97914	-2.65434	-2.80891	-1.45914	-3.15073	-3.40863	-0.890033	-2.1564	-1.79115	-0.918982	-2.44894	-1.03947	-2.49037	-1.67441	-1.22553	-1.30106	-2.69972	-2.86109	-3.48163	-0.962772	-0.986614	-1.43786	-1.45656	-3.27741	-1.02452	-1.56768	-1.70551	-0.698828	-1.22802	-1.65318	-1.71414	-0.656251
-1.49307	-1.3619	0.202576	-2.51504	0.0421491	-3.38343	-3.00941	-0.299325	-2.45727	-1.11944	-0.32184	-1.49465	-0.201735	-0.681375	-0.593823	0.285683	-3.21765	-1.9435	-3.03175	-2.18681	-0.915041	0.0231905	-3.20793	-1.27225	-0.441051	-2.79364	-1.26734	-0.979037	-2.13881	-0.875465	-2.08982	-2.16005	-1.27169	-1.23294	-1.51479	-2.58742	-2.43397	-1.31576	-0.651287	-1.05294	-0.570467	-1.13961	-0.865147	-3.27325	-2.53254	-1.0848	-0.9942	-2.06948	-1.20777	-0.451838
-0.48686	-0.113709	-1.14604	-0.528535	-0.479558	-0.682485	-0.427243	-0.647033	-1.06381	-0.825058	-0.901943	-0.493276	-0.861472	-0.554367	-0.550989	-0.599451	-0.836247	-0.64653	-0.354644	-1.21596	-0.491965	0.150351	-0.412829	-0.233136	-0.393367	-0.433203	-0.375336	-0.173006	-0.823544	-0.587015	-1.13159	-0.549254	-0.353367	-0.0127277	-0.842105	-0.218163	-0.282867	-0.455978	-0.117245	0.207081	-0.114447	-0.296024	-0.26821	-0.95099	-1.09063	-0.636121	-0.461889	-0.140022	-0.442509	-0.545774
-1.01115	-1.68065	-0.634264	-0.469728	-2.07301	-0.896758	-1.0134	-1.60129	-0.925522	-0.915907	-1.29859	-0.954864	-3.03064	-2.41968	-2.22917	-2.22032	-0.350561	-0.683207	-1.00992	-0.983195	-1.16817	0.25688	-1.05646	-1.32269	-1.36621	-1.38976	-0.828181	-1.55039	-0.699115	-1.54241	-1.22876	-1.27134	-0.762822	-2.02658	-1.379	-2.66817	-1.62218	-0.717729	-1.4921	-0.512022	0.210402	-0.682956	-1.39949	-0.0779762	-0.923137	-1.13002	-1.61673	-2.41004	-1.77677	-1.55416
-1.67505	-2.69415	-1.95989	-0.881946	-1.61381	-1.6481	-1.49557	-3.64001	-1.59603	-1.99144	-1.24949	-1.45542	-3.19237	-1.437	-2.4227	-1.71237	-1.61649	-1.56097	-2.53111	-2.29618	-2.69896	-2.28814	-2.10032	-1.78057	-2.09001	-1.09203	-1.82486	-1.58274	-2.59073	-1.91331	-2.81934	-1.15541	-3.0072	-1.74483	-1.75594	-1.22229	-2.85105	-1.21543	-1.67153	-0.51738	-1.29574	-1.64393	-1.77073	-1.35207	-1.55464	-1.88827	-2.63763	-2.81929	-1.70793	-3.17444
1.323	2.37691	2.75868	1.49805	2.51567	1.19975	1.79794	2.4337	1.40519	1.41396	2.23597	1.76022	1.57678	1.80903	1.66507	2.26273	1.16765	1.08435	2.31674	1.09817	1.7388	2.04522	2.37313	1.69872	1.9862	1.69516	1.81402	1.8836	1.5247	1.8753	2.10232	1.44255	1.96625	2.16986	1.71222	2.9182	2.32142	1.6071	2.31892	2.25387	1.84486	2.08904	2.00882	1.41638	1.40617	2.00116	2.13743	2.44436	2.01272	1.85836
-0.0217676	-1.68561	-2.00983	-0.0899954	-0.261029	0.0788355	0.292197	-1.5129	-0.486119	-0.10376	-0.922213	-0.317017	-1.01465	-1.19244	-0.365756	-2.87709	-0.153131	-0.104152	-3.22555	-0.266238	-0.312828	-0.988798	0.0107365	0.225191	0.170189	-0.546771	-0.169747	-0.360559	0.381644	0.162896	-1.12946	0.152718	0.30228	-0.567992	0.400927	-2.83771	-3.24405	0.0171866	0.200267	0.323668	-0.055439	0.255785	-0.0798864	-0.439382	-0.179474	0.104464	-0.013916	0.111581	-1.45995	-0.41275
0.30205	0.380426	0.789092	-0.256636	0.911593	0.158999	0.194476	0.881295	-0.227873	0.749552	0.289802	0.28483	0.297268	0.240529	-0.175414	0.583554	0.697964	-0.218232	0.518943	0.689039	0.389163	0.426704	0.393345	0.013423	0.0133467	0.452369	0.560826	0.628151	0.83989	0.34318	0.0153947	0.48103	0.0997033	0.388962	0.309071	-0.37395	0.325377	0.488635	0.605946	0.325168	0.394098	0.293978	0.372228	0.0487471	-0.100348	0.449164	0.346193	0.0904036	-0.409927	0.322506
-0.486748	-1.73035	0.327636	0.516461	-1.68421	0.875473	0.242017	-1.7219	-1.12679	1.22626	-0.860428	-1.0235	-2.20651	-1.20344	-2.21917	-2.91949	0.948795	-0.218563	-0.578055	-1.60772	-0.270959	1.4852	0.464184	-0.352852	-1.6122	-0.300334	-1.09918	-0.0116215	0.794162	-0.716957	0.182093	-0.359637	-0.302536	-0.857758	-1.12486	-0.538989	-1.2138	0.227844	-1.36432	-0.446406	-0.59712	-1.02512	-1.54338	0.84902	-1.14324	-1.05096	-1.28609	-2.05204	-0.692484	-1.75871
-0.13676	2.29306	-0.102875	-0.181028	0.5426	-0.511646	-0.243659	1.63179	-0.452819	-0.540311	-0.633959	0.455103	-0.210005	0.0735536	0.419592	1.76446	-0.503825	-0.0738082	1.28674	0.146331	0.611246	1.54921	-0.220024	0.383436	-0.156179	0.408125	0.78114	0.61862	0.0502796	0.104641	0.63844	-0.0239019	0.559412	-0.235042	0.156662	0.931253	2.74082	-0.143024	0.00980282	2.17006	-0.109911	0.189468	0.0994644	-0.274028	-0.135286	-0.278876	1.16948	1.92235	-0.434366	0.0898299
1.6483	1.24657	0.654956	1.67385	1.45293	1.47744	1.37935	1.11278	1.60017	1.75404	1.64954	1.23737	1.14119	1.36833	0.592525	0.481476	1.45371	1.42084	0.305018	1.31109	1.21423	0.729198	1.38789	1.39451	1.18523	1.64868	1.14978	1.58874	1.58406	1.76266	0.6895	1.80988	1.56359	1.51538	1.60003	1.52167	0.961348	1.58581	1.67137	1.4126	0.832216	1.54112	1.46745	1.25629	1.15171	1.66111	1.19339	1.27737	1.36282	1.42252
-0.0685015	-2.76033	-1.8812	-0.258429	-0.244833	-0.275883	-0.063962	-0.173965	0.023632	-0.534481	-0.231453	0.361032	-0.816215	-0.569855	0.0815954	-3.18215	-0.25809	0.113675	-0.302892	0.188282	-3.43653	-3.33854	-0.473447	-2.97312	-0.488952	0.255733	0.184914	0.229241	0.101161	-0.239493	-3.13779	0.355533	-0.0039897	-0.32269	0.212025	-2.83132	-3.16849	0.00816202	0.0781517	-2.75331	-0.149972	0.27247	0.217225	-0.160082	0.237917	0.35008	0.147386	0.122947	-0.324454	-0.152828
2.32089	-0.523746	-1.9134	1.98132	1.43595	1.55286	1.75504	0.554337	1.76854	1.8429	0.907758	1.98309	1.01474	1.47429	1.9868	-0.532161	1.86878	2.10527	-0.525904	1.95056	1.39033	1.03684	1.60543	1.53559	1.61408	1.46795	1.84107	1.18394	1.7299	1.80228	0.758396	1.63725	1.87795	0.742633	2.19261	0.534821	0.767542	2.05095	1.97525	0.975459	2.36993	2.34134	2.06547	1.90722	1.83873	2.08591	1.16029	0.99325	1.50233	1.91378
-1.21642	-1.7476	-0.674234	-1.59291	-0.078609	-1.4698	-1.27446	-1.32358	-2.23962	-1.3016	0.0107164	-1.76885	-1.88923	-1.90523	-1.3806	-1.30277	-3.23291	-3.48387	-3.02158	-2.67968	-1.93903	-1.69743	-2.77304	-1.75951	-1.48929	-2.29224	-0.472428	-0.826949	-1.35725	-0.582127	-2.17713	-2.08617	-3.11462	-0.603363	-0.876647	-2.42389	-2.40421	-1.41905	-1.18374	-1.73127	-1.31824	-1.41861	0.283993	-1.73092	-1.91907	-1.70975	-0.712525	-1.19988	-1.85556	-1.18507
1.34083	1.9327	0.680533	1.26435	1.6295	1.40497	1.36914	1.87569	0.552028	1.11175	1.1716	1.374	0.178789	1.11951	1.06134	1.6853	1.40181	0.824652	1.60945	0.713466	1.45748	1.4394	1.29688	1.61841	1.63808	1.41446	1.46003	1.59243	1.66115	1.48924	1.49996	1.22444	1.36098	1.71555	1.22	1.33537	1.96725	1.01352	1.47191	1.62049	1.5048	1.35655	1.1954	0.773372	1.10517	1.44564	1.54761	1.51074	1.50789	1.42233
1.1434	-0.417048	-0.0324788	1.05463	0.871292	1.35605	1.48879	0.315512	1.21831	1.31053	1.26938	0.691083	0.796117	0.732048	-0.233142	0.150885	0.969074	1.02646	-0.508874	0.209158	0.302146	-0.319931	1.0054	1.05158	0.680655	0.923316	0.893764	0.831129	1.1022	0.992457	0.263079	1.47634	0.928317	0.893863	1.09392	-0.420674	0.0538692	1.66608	1.23775	0.0214086	1.04989	0.807831	0.99701	0.859824	0.683774	1.05866	0.476838	0.666554	-0.26047	0.483055
-1.39033	0.299974	0.0393443	-3.22738	-0.399242	-0.516977	-1.1567	-0.172815	-0.977281	-1.04802	-0.276686	-0.736368	-0.338029	-1.28538	-0.404618	0.293097	-0.503228	-1.86606	-1.51918	-2.50919	-1.20312	-0.884725	-1.5187	-1.14723	-1.07852	-2.52253	-1.00561	-0.79465	-1.33842	-0.451737	-2.79399	-0.899467	-0.632173	-0.805853	-2.42815	-0.629466	-1.0134	-1.68814	-1.02048	-1.27382	-0.526214	-0.809076	-0.640758	-2.3313	-1.13877	-1.33877	-0.680199	-1.2639	-0.838485	-2.60066
-0.504371	-0.526305	-0.454	-0.76062	-0.315666	-0.783352	-0.842882	0.00802755	-0.871114	-0.816497	-0.694669	-0.466674	-1.12557	-0.8967	-0.846128	-0.244618	-1.36646	-1.01719	-0.534409	-1.68032	-0.646517	-0.564553	-1.22824	-0.738915	-0.577271	-0.421866	-0.427647	-0.302405	-1.44668	-0.67437	-1.65236	-0.273969	-0.467917	-0.433147	-1.22966	-0.994381	-0.577983	-0.510802	-0.406792	-0.288911	-0.561955	-0.604917	-0.455413	-1.19987	-1.11228	-0.542288	-0.422347	-0.518155	0.114099	-0.751306
3.95448	3.80468	3.10162	4.0644	3.36273	4.65695	4.55101	3.10976	3.436	4.22446	3.09122	3.56144	2.31468	3.35861	2.73949	4.02711	3.77036	3.73159	3.4795	2.90392	3.61062	3.42683	4.15512	4.4162	4.32212	3.12083	3.45142	3.62355	3.93829	3.93277	3.27498	3.09874	4.14764	4.02173	4.16956	3.1061	2.93647	3.77484	4.59816	3.29688	4.1039	4.23218	3.8803	3.66251	3.59556	3.96628	3.43497	3.47221	4.693	3.37383
-0.893295	-0.333362	-1.09397	-0.900221	-0.805756	-0.964828	-1.35389	-0.542859	-3.17652	-0.829961	-0.466566	-1.16405	-2.97925	-2.06713	-2.3047	-0.452412	-1.49173	-1.06431	-1.81961	-1.74201	-1.23368	-1.13605	-1.11674	-2.33807	-1.32142	-3.40553	-0.965274	-1.2501	-0.757888	-0.197907	-2.71618	-1.07222	-0.897855	-1.39081	-0.635708	0.884528	-0.532239	-1.35723	-0.687897	0.0254703	-0.895274	-0.549253	-0.591524	-2.27763	-0.91904	-0.701063	-0.483671	-1.00146	0.0760994	-0.33129
-1.14998	-2.20031	-0.053514	0.720016	-1.55015	-0.925149	-0.667485	-1.29206	0.600824	-0.0808787	0.320695	-1.14759	-1.18241	0.166098	-2.36692	-3.24572	-0.297946	-2.77364	-3.11586	-0.391885	-0.934618	-3.78976	0.602764	-1.19765	-1.04947	-0.645581	-0.941338	-3.03337	-3.28548	-1.76318	-2.77989	-0.518292	-1.60307	1.24936	-1.67656	-2.52438	-3.00906	1.38057	-2.51809	-1.30043	-0.995171	-2.87958	-2.83381	-0.894048	-1.00672	-0.955398	-0.173749	-2.52653	-1.18698	-0.957268
-0.842326	-2.86503	-2.86762	-0.666411	-3.02435	-0.208459	-0.732601	-1.82248	-0.614717	-0.749	-1.06962	-1.26826	-2.38742	-1.12079	-1.26047	-3.39922	-0.990814	-0.869523	-2.3934	-0.696744	-1.08676	-1.80347	-0.356305	-0.54245	-0.356126	-3.56815	-2.79242	-1.98573	-0.285391	-0.840593	-2.46596	-1.37012	-0.456743	-2.11031	-0.279821	-1.62499	-2.24868	-1.12835	-0.372056	-0.995743	-1.13086	-0.874977	-1.73456	-1.04016	-0.338216	-1.09129	-1.90904	2.19835	-1.58122	-0.790201
4.06656	2.92314	3.45788	3.91575	3.83976	4.1229	3.95977	3.74556	4.12628	3.94944	4.27673	3.679	3.2492	3.40995	3.46296	4.0803	3.96157	4.15248	2.5182	3.91241	3.47281	3.12294	3.89504	3.78913	3.60162	4.45439	4.27933	4.08889	4.16168	4.41078	2.14729	4.45976	3.69295	3.71652	4.1271	2.02019	2.79739	4.41242	4.19952	3.58461	3.71766	4.22256	4.10359	3.72867	3.67144	4.17945	3.6723	4.05578	3.28865	3.71795
-0.0855236	-1.24454	-1.53237	-0.172131	-0.765636	0.0221434	0.0373039	-1.20405	-0.573153	-0.42922	-0.735124	-0.536644	-2.73954	-0.400755	-1.33292	-3.0406	-0.596973	-0.849748	-0.926337	-0.740543	-0.469078	-0.260941	-0.23064	-0.42817	-0.481496	-0.11865	-0.541007	-0.428506	-0.408081	-0.623523	-3.5782	-0.0408516	-0.326556	-0.720028	-0.272544	-0.859253	-0.969023	-0.0109706	-0.255398	-0.743909	-0.424565	-0.349801	-0.653292	-0.64787	-0.673585	-0.299614	-0.490918	-0.50182	-1.4692	-0.684996
-2.89438	-2.45505	-0.769858	-2.63046	-0.580774	-1.89583	-1.73924	-1.16631	-2.81648	-1.51614	-0.555166	-1.33302	-2.62344	-1.96238	-1.8936	-0.83448	-2.65958	-2.67117	-2.72329	-2.4994	-3.0191	-1.75097	-3.20424	-2.28176	-1.68257	-3.02077	-1.24771	-1.1028	-2.92404	-1.59696	-2.18674	-2.22812	-1.66288	-0.418474	-2.35435	-2.42494	-2.34536	-1.9361	-1.04848	-1.3433	-2.6505	-2.24713	-1.14035	-2.85769	-2.28743	-3.07716	-2.4351	-2.04864	-2.89505	-1.29687
-0.15345	1.04914	0.286125	-0.101253	0.75186	-0.18959	-0.151086	0.64738	-0.385836	-0.0858245	0.393839	0.00436306	0.0359821	0.741288	0.11101	0.811215	-0.308459	-0.446751	0.810463	-0.644144	0.316332	0.271791	-0.219194	0.219441	0.481212	0.184644	0.364702	0.529821	-0.215318	0.452517	0.942511	0.0461617	0.541914	1.0163	-0.317165	0.474585	0.725304	-0.164138	0.363842	0.635457	0.147309	-0.0338507	0.627496	-0.33902	-0.533858	0.0985804	0.446281	0.794588	0.0560455	0.202049
2.32336	0.0643735	-0.680229	1.92379	0.634951	2.24085	1.95801	-0.144526	1.76023	2.09503	0.83927	1.8258	0.368394	1.61368	2.13631	-0.659476	1.87353	2.10315	0.37958	2.33071	1.8911	0.467064	2.05787	1.86305	1.84026	2.23174	2.37332	1.60731	2.2058	1.87845	-0.280964	2.54397	1.66649	1.04151	2.05573	-0.640103	-0.390215	1.72098	1.75358	0.801404	1.98887	2.34782	2.182	1.78166	2.2092	2.02671	1.27542	0.518923	0.959325	1.60251
1.92176	0.561278	-1.08814	1.79101	0.16994	1.77403	1.51617	0.527241	1.44804	1.7989	0.239313	1.27627	0.39259	1.93451	0.611107	-3.58292	1.50043	1.7518	0.413778	1.44077	1.20534	-0.667939	1.39201	1.20367	1.20343	1.07996	0.885904	-0.604793	1.68217	1.49245	0.0869679	0.856872	1.41962	0.537408	1.70499	0.2746	-2.9438	1.77477	1.19714	0.350038	1.35619	1.43313	1.38495	1.4348	1.76166	1.73024	0.801545	0.527451	1.46715	1.25098
-0.00204086	-1.30714	-3.08631	0.230065	-0.689763	0.0749912	-0.0451298	-1.54827	0.448126	-0.213	-0.119214	0.597047	-0.780008	0.184178	0.051178	-0.888362	0.0319967	-0.587593	-1.99251	0.200454	-0.238827	-0.918017	0.0412464	-0.0139837	-0.169722	1.90643	1.0889	-0.137806	-0.0543985	-0.115852	-0.653911	1.45025	-0.282212	-0.322435	-0.19796	-3.30688	-1.71822	0.576641	-0.171741	-0.757856	0.13049	-0.0370159	0.10393	0.634995	-0.0687852	0.876462	-0.156881	-0.456294	-0.629423	0.143119
0.379637	0.857	0.540963	0.200626	0.928827	0.388348	0.351244	0.464857	-0.0294228	0.0355535	0.375367	0.324111	-0.31562	0.150417	-0.0301905	0.598039	0.204262	0.0743566	0.364552	0.152227	0.389407	0.639148	0.123211	0.433243	0.298041	0.404332	0.514659	0.638109	0.389744	0.55696	0.0204091	0.339974	0.348266	0.742454	0.207862	0.38923	0.619407	0.299967	0.882442	1.16364	0.491184	0.684293	0.713379	0.208389	0.406758	0.719497	0.518308	0.476219	0.525414	0.0419021
-0.416004	0.23225	0.666223	-0.554263	-0.356453	-0.954678	-0.855199	-0.105356	-1.22741	-0.398005	-0.482921	-0.502945	-3.67917	-0.641988	-0.438185	-0.0121317	-0.376983	-0.889598	-0.110874	-0.75255	0.174015	-0.755065	-0.402142	-0.347942	-0.429194	-2.53482	-0.562353	-0.213358	-0.790014	-0.273125	-2.30725	-1.06923	0.191631	-0.538398	-0.869913	-0.762461	-0.418441	-0.47783	-0.208971	0.0556741	-0.629177	-0.4726	-0.287512	-0.941848	-0.908786	-0.746798	-0.150582	-0.0244408	0.126637	-0.345973
-2.76255	-1.74648	-1.29343	-3.39667	-1.16013	-1.63825	-1.93169	-1.82323	-2.82748	-2.10795	-1.31853	-2.36134	-2.10293	-2.63211	-2.66758	-2.40867	-2.24675	-2.65717	-2.78807	-3.27738	-2.46746	-2.36128	-2.57945	-2.53134	-2.3403	-3.28526	-1.97047	-2.16288	-2.49894	-1.96094	-3.24299	-2.9803	-2.4349	-2.04228	-2.39068	-2.38258	-2.20272	-1.57812	-1.70893	-1.24364	-2.94463	-2.0224	-1.28901	-2.59003	-2.30838	-2.21521	-2.11711	-1.29751	-2.25639	-2.73222
0.388349	-0.349646	-1.35961	0.0837278	-1.31155	0.404323	0.133766	-1.0607	-0.117237	0.46375	-1.11921	0.0558271	-1.20922	-0.804265	-0.626471	-2.30754	-0.0403786	-0.344034	0.233406	0.096755	0.551482	-0.496892	0.668674	0.287283	-0.0961905	-0.24931	-0.665185	-0.81493	-0.103091	-0.915695	-1.12372	-0.397167	-0.719925	-1.27806	-0.265352	-2.62078	-1.51256	-0.0960078	-1.53381	-1.74471	0.0794134	-0.0155888	-0.368446	0.319227	0.0979037	-0.254105	-0.626842	-1.28498	-1.7633	-0.957957
1.35397	1.40235	1.23806	1.13333	1.47639	1.13454	1.2053	1.48571	0.779435	1.20156	1.45394	1.06978	0.456428	0.915961	0.864793	1.22621	0.948462	0.93512	1.43024	0.858736	1.39805	1.11749	0.987774	1.24919	1.15623	0.99324	1.27718	1.298	1.15307	1.45076	1.01259	0.820477	1.16315	1.16285	1.23633	0.920622	1.32706	1.03446	1.36657	1.38094	1.11228	1.3195	1.52503	0.689105	0.726495	1.19531	1.52367	1.24302	2.21673	1.23442
4.6105	0.0384183	1.16864	4.12142	1.10854	5.00508	4.80208	0.586732	3.02538	3.78397	1.13681	4.34475	0.810426	2.73515	4.01875	1.19734	4.34956	4.39362	-0.65794	4.04011	3.37036	-2.80836	4.52486	4.2845	4.72195	2.14154	2.99797	1.99638	4.34966	3.5483	0.848534	2.44591	4.39242	1.12933	4.33559	0.681913	-0.43528	3.70781	3.85797	1.17337	4.54408	4.64054	3.73347	3.95133	4.99395	4.33602	2.86707	1.51065	2.78108	3.20896
-1.422	-0.425581	-0.100877	-1.13228	0.306279	-1.19318	-0.909109	-0.233993	-1.61156	-0.921357	0.0629129	-1.15157	-0.532288	-0.568421	-1.01201	0.903304	-2.56482	-1.21488	-0.102404	-1.63598	-1.03256	-0.760913	-1.21975	-1.19906	-0.426526	-1.27087	-0.599392	-0.123588	-1.4144	-0.519488	-0.605422	-1.40437	-0.717217	-0.480525	-1.25403	-1.24625	-0.847116	-0.916214	-0.299459	-0.596526	-1.01316	-0.94189	-0.0728102	-1.50774	-1.63637	-1.13118	-0.893679	-0.824603	-1.4337	-0.792408
-0.789027	-2.62885	-1.97984	-0.452927	-1.68242	-1.48952	-1.60681	-1.40995	-0.392589	-1.00331	-0.766459	-0.711474	-0.700626	-0.89082	-2.43447	-2.50951	-0.653271	-0.578661	-3.14799	-1.39834	-0.830937	-2.80302	-1.1021	-1.54717	-0.848482	0.635796	0.363008	-0.207782	-0.91375	-1.57836	-3.12618	0.745452	-0.981457	-0.766519	-1.04758	-3.56629	1.28453	-0.34652	-1.39832	-2.39598	0.284912	-1.1953	-0.669711	-0.628503	-1.10833	-0.467821	-1.22873	-0.998292	-3.1578	-1.08215
-0.245551	-1.17933	-3.75626	-0.630173	-1.12517	-0.0881128	-0.211265	-0.850555	-0.343671	0.0417628	-0.883567	-0.871948	-0.952801	-2.58405	-0.80337	-2.42326	0.315404	0.194462	-1.23882	-2.2553	-0.644186	-2.28881	-0.476565	-0.445908	-0.313035	-0.438541	-0.310813	-0.823384	-0.295029	-0.699132	-3.22384	-0.246617	-0.672097	-1.29074	-1.18429	-2.20519	-1.05754	-0.206045	-0.10538	-2.84465	-0.375587	-0.887399	-1.03984	-0.530119	-0.681862	-0.449743	-0.620311	-4.31856	-0.982792	-3.07333
1.90636	-0.959629	-0.183521	2.16609	0.036303	1.89811	1.71075	-1.11782	0.773017	1.65344	-0.165381	1.11752	-0.328952	0.761595	1.41963	-2.47146	1.65756	1.83573	-0.419492	1.79848	1.29361	-1.08548	1.52298	1.34572	1.02604	0.413018	0.635214	-0.501419	2.27344	1.52361	-0.491511	0.0263777	0.86601	-1.23643	2.19909	-2.86962	0.124816	1.72754	0.963921	-0.281272	2.06277	1.54946	1.1101	1.76795	2.15947	1.16002	0.5381	-1.09468	0.470119	0.935672
0.275068	1.41341	0.250669	0.462143	1.0783	0.0441952	0.191339	0.761158	0.00786591	0.517697	0.788573	0.177067	0.239591	1.07195	-0.403185	0.246382	-0.0795307	-0.55198	0.926696	-0.191802	0.466019	0.806715	0.31813	0.499908	-0.0903168	0.459956	0.0101404	0.347933	0.085784	0.55027	0.253635	0.451489	0.420039	0.954322	0.42578	0.439796	1.2768	0.979346	0.53749	1.56135	0.530185	0.265553	-0.0168047	-0.008008	0.152433	0.835652	0.94516	1.525	0.280922	0.324385
-1.79345	0.36934	-1.14969	-1.8504	-1.19037	-2.01709	-2.39313	-1.05036	-3.19971	-2.86355	-0.710204	-0.66784	-0.815873	-2.08044	-1.91848	-0.953304	-3.20466	-2.93639	-0.7806	-2.5643	-0.948697	-3.01633	-1.07052	-2.72901	-2.61683	-0.412434	0.00767899	-1.14809	-2.09006	-2.65987	-3.36232	-0.444916	-2.5501	-1.27205	-2.61442	-2.82262	-0.689122	-1.14249	-2.04556	-0.0325847	-2.61594	-2.52581	-1.15477	-3.12799	-2.42324	-0.617502	-0.945545	-0.17115	-0.91382	-1.56032
-0.126259	1.07304	-0.237799	-0.533678	0.304206	-0.288331	-0.177525	0.636024	-0.768729	-0.586528	-0.680859	-0.133135	-0.549923	-0.4703	0.0289984	0.510865	-0.770008	-0.751483	0.424682	-0.424658	-0.129287	0.404003	-0.272982	0.0533876	-0.206374	0.142303	0.461603	0.497554	-0.26273	0.0803938	-0.161439	-0.194967	0.03122	0.0418119	-0.348643	-0.410343	1.28132	-0.384025	0.0821209	1.31602	-0.179922	0.12194	0.138264	-0.518832	-0.505214	-0.00556374	0.299734	0.919692	-1.07783	-0.577026
-1.82485	-1.75708	-2.41452	-2.28748	-1.12162	-1.46827	-1.97357	-1.57379	-2.76177	-3.33051	-1.57543	-1.71637	-1.78515	-2.1967	-1.86535	-1.51593	-1.93459	-2.10556	-2.72204	-2.96261	-1.52911	-1.35955	-2.01981	-2.17478	-1.42843	-2.33279	-2.22474	-1.1602	-1.96222	-1.52035	-2.21804	-2.5979	-1.7185	-1.82928	-1.78348	-1.82979	-1.99596	-2.17476	-1.38019	-1.80347	-2.03062	-1.42843	-1.86652	-1.83214	-2.47386	-2.78024	-2.92189	-1.84149	-2.48215	-2.38566
1.92025	2.02316	1.76207	1.72186	2.15905	1.9138	1.89727	1.9136	1.59411	1.69488	1.92492	1.81234	1.22055	1.73469	1.65827	2.0484	1.63327	1.82239	1.81726	1.45112	1.66528	1.87526	1.71593	1.8734	1.53964	2.05962	2.13139	2.10337	1.81938	2.066	1.30941	2.10312	1.67246	1.91354	1.73424	1.51862	1.92602	1.94628	2.10893	2.43652	1.97318	2.03771	2.0844	1.80601	1.85589	2.20157	1.95164	1.89188	1.61893	1.58853
-0.521694	-0.145657	0.794744	-0.599077	0.0633636	-0.664802	-0.618737	-0.616272	-1.67663	-0.716166	-0.651155	-0.748475	-0.174643	-1.23222	-0.762195	0.167025	-1.04357	-0.972334	-1.59075	-0.808187	-0.73886	-0.702913	-0.755575	-0.538671	-0.964551	-1.33536	-0.589883	-0.474691	-0.170697	-0.0789261	-1.13208	-1.53459	-0.849014	-0.21507	-0.346854	-1.02078	-0.801519	-0.808422	-0.170345	-0.699445	-0.745051	-0.741256	-0.861343	-0.777445	-0.480891	-0.2063	-0.393338	-0.70027	-2.12284	-0.514683
-2.80401	-2.00574	-2.23041	-2.1509	-2.02807	-2.25713	-2.29864	-2.88759	-2.87807	-3.10077	-2.64813	-2.45104	-1.11127	-1.14514	-2.28383	-1.94517	-3.18488	-2.51229	-2.05131	-3.17826	-1.8056	-2.13753	-2.99573	-3.30814	-2.84893	-1.86874	-1.85011	-2.29675	-2.35002	-1.98802	-2.66697	-2.18056	-2.08982	-2.14938	-1.97049	-2.32799	-1.62753	-1.52126	-1.84926	-1.30811	-1.22378	-2.20685	-2.19312	-2.23126	-3.18969	-1.82187	-1.57504	-1.2477	-2.25418	-2.85051
0.26045	-0.831793	-0.257179	0.288087	-0.395965	0.2681	0.00440407	-0.956595	-0.0670891	0.00603628	-0.258271	0.106268	-0.149207	-0.0869088	-0.299143	-0.709428	-0.203287	0.0317092	-0.0723391	-0.0495834	-0.203791	-0.254242	-0.131798	-0.224497	-0.201813	-0.172011	-0.0591097	-0.383341	0.182982	-0.0993557	-0.365548	-0.202024	-0.264767	-0.113279	0.186039	-0.136501	-0.105153	-0.116432	-0.273961	-0.276882	0.360302	-0.114875	-0.403974	0.106498	0.124941	0.21735	0.0356178	0.0628357	-0.0245323	-0.165259
0.846974	-0.873111	-1.63718	0.62071	-0.423501	0.36095	0.418951	-0.647464	0.336614	0.503476	-0.0558395	0.12188	-0.152229	0.238629	-0.496056	-1.25074	0.429331	0.778173	-0.716926	0.214662	0.237697	-0.365988	0.359457	0.214876	0.0941687	0.309534	-0.0160875	-0.187124	0.633651	0.434978	-0.450357	0.402853	0.176273	-0.347644	0.662227	-1.22692	-0.76923	0.778615	0.117257	-0.428283	0.0809116	0.136643	0.128728	0.12093	0.0216174	0.366712	0.0739412	-0.378288	-0.0414286	0.0155387
2.53843	1.39742	1.94564	2.52803	1.76456	2.61922	2.38268	1.8602	2.04968	1.99033	1.58631	1.9028	1.42555	1.96533	1.46391	1.32796	2.38391	2.69177	1.30914	2.18303	2.07194	1.71952	2.4358	2.25767	2.07565	2.09819	2.05457	2.15708	2.48692	2.13311	0.99343	2.28361	1.97527	1.85832	2.80836	1.32415	1.68142	2.47868	2.30543	1.79806	2.31446	2.39027	1.98409	2.06587	2.28268	2.30167	1.83581	1.57246	1.65369	1.95994
-2.45239	-3.15438	-2.29274	-2.51734	-2.35649	-1.99338	-2.09874	-2.73618	-1.98048	-2.30305	-2.97682	-2.39826	-2.90461	-2.92567	-2.37318	-2.29313	-1.54959	-2.38449	-2.79164	-2.4323	-3.88618	-2.12293	-2.29769	-2.35993	-2.32407	-1.56524	-1.94557	-2.49396	-1.87232	-2.34664	-3.41137	-1.73276	-2.63357	-2.94039	-1.78782	-2.331	-2.80837	-2.78065	-2.43063	-3.02191	-2.11551	-2.14492	-2.66794	-1.98594	-2.45145	-2.50882	-2.37852	-2.19254	-3.04177	-2.56643
0.897945	-2.42498	-3.79944	-0.250891	-0.328562	-0.341576	-0.328781	-2.18309	0.998446	0.600519	0.407048	-1.16159	-0.526563	-0.762541	-1.37669	-2.39029	0.351632	0.492174	-1.30943	0.109684	0.364375	-1.23405	0.154475	0.486217	0.09058	-0.530107	-0.775661	-0.669251	0.492769	0.816703	-2.98429	1.51788	0.865112	-0.198812	0.107169	-2.62578	-1.5027	0.39543	0.0908709	-1.89532	-0.362162	0.214937	-0.107749	0.314566	0.0514159	1.1088	0.0107393	-0.950437	-1.25092	-0.370615
-1.11156	-0.381896	-0.639226	-0.851427	-0.495536	-0.855286	-0.914152	-0.55715	-0.770681	-0.766717	-0.592545	-0.568305	-0.28371	-1.1692	-2.64181	-0.622775	-0.722488	-1.03158	-0.911167	-0.75914	-0.844487	-0.650183	-0.867354	-0.891018	-1.0275	-0.960043	-0.541019	-0.443948	-1.04633	-0.836774	-1.07568	-1.00929	-0.781726	-0.773417	-0.689794	-0.678054	-0.562819	-0.707239	-0.711477	-0.753381	-0.749038	-0.69012	-0.339815	-0.81346	-0.663555	-0.538483	-0.453521	-0.77556	-0.616079	-0.913996
-0.12975	0.370021	-0.19637	-0.335829	0.305707	-0.264314	-0.304476	-0.0287232	0.041419	0.0860496	0.339076	-0.24472	-0.047039	0.221755	-0.223145	0.0218563	-0.328531	-0.349162	0.0385237	-2.36982	0.0297713	-0.0149746	-0.1847	-0.233624	-0.270563	-0.252731	-0.200088	0.155107	-0.471674	-0.00868893	-0.00254107	0.165177	0.196566	0.257039	-0.233698	0.273946	0.177294	0.0784745	-0.00653076	0.503307	-0.521421	-0.135635	0.305772	-0.495841	-0.199172	0.202353	0.344049	0.420574	-0.355486	0.113469
1.79366	2.71005	1.73503	1.39218	2.17354	1.61702	1.79568	2.37677	1.2627	1.39776	1.49046	1.76048	1.12587	1.54395	1.82599	2.23736	1.30084	1.47358	2.0922	1.54785	1.77504	2.10188	1.48219	1.88014	1.69499	1.824	2.11808	2.23241	1.67005	2.03659	1.35432	1.70095	1.97261	2.06063	1.53108	1.50253	2.58371	1.4931	2.1659	2.99993	1.64414	1.9967	1.96947	1.30035	1.39618	1.86942	2.06193	2.53238	1.61855	1.548
-0.563665	-0.789949	-3.044	-0.538876	-0.96814	-0.657396	-0.620442	-0.457001	-0.613561	-0.381527	-0.785359	-0.427772	-2.69712	-1.10944	-0.660893	-0.645829	-0.503689	-0.766191	-0.753392	-0.398298	-0.771773	-0.705737	-0.87775	-0.775318	-0.808285	-0.742352	-0.600996	-0.934319	-0.584478	-0.866984	-0.747871	-0.619665	-0.871695	-1.01641	-0.744078	-0.888869	-0.80477	-0.785543	-0.588058	-1.04143	-0.740335	-0.773773	-0.790698	-0.850789	-0.241384	-0.829078	-0.613832	-0.861565	0.21435	-0.544446
-0.529379	-0.84982	-2.06598	-0.643336	-1.1534	-0.599321	-0.601725	-1.36212	-1.23799	-0.87545	-1.03916	-0.882397	-3.51911	-2.48411	-1.58369	-1.0361	-0.676295	-0.839851	-2.52862	-1.02965	-0.626894	-3.43041	-0.842266	-0.991177	-1.08443	-0.455956	-0.821596	-0.739141	-0.596204	-0.771367	-2.87301	-1.0663	-2.99465	-1.02573	-0.843501	-2.61367	-0.896016	-0.801423	-0.863864	-0.877698	-0.634268	-0.848118	-0.686836	-0.626884	-0.629925	-0.65288	-0.826019	-1.09326	-0.568664	-2.84832
-0.195581	-1.61784	-1.78841	-0.867504	-0.990246	-0.539297	-0.36156	-1.70775	-0.843566	-0.789797	-1.52328	-0.904527	-1.30752	-0.987648	-1.11922	-3.31485	-0.605778	-0.250179	-2.80198	-0.457782	-0.705644	-2.27223	-0.286584	-0.388728	-0.722712	-0.610357	-0.513766	-0.792952	-0.446244	-0.806955	-2.13487	-0.934828	-0.901681	-1.78295	-0.934345	-2.50648	-2.10992	-0.708611	-0.950732	-1.45513	-0.434975	-0.599498	-1.16296	-0.447277	-0.508845	-0.537623	-0.961864	-1.48279	-1.84774	-1.02918
-0.128706	-0.0476317	-0.607046	-0.159028	-0.242177	-0.0331411	-0.190992	0.021646	-0.243991	-0.000702381	-0.278973	0.0205441	-0.270046	-0.522724	-0.434694	-0.194941	-0.179119	-0.0114522	-0.644514	-0.127251	-0.555276	-0.139668	-0.249559	-0.190105	-0.685751	0.174578	0.216866	-0.141776	0.0348778	0.16501	-1.68229	0.222362	-0.104577	-0.235947	-0.0659699	0.210033	-0.348128	-0.320082	-0.0386944	-0.222084	-0.0879154	0.129659	-0.134881	-0.264797	-0.084784	-0.16188	-0.152163	-0.212679	0.0684252	0.192742
-1.26353	-0.263713	-1.28561	-1.35069	-1.20708	-1.34986	-1.18719	-0.703026	-2.90451	-3.16507	-1.52374	-1.02231	-2.40547	-1.48204	-2.95194	-0.939413	-2.65473	-3.37669	-0.847485	-1.27607	-1.12198	-0.679984	-1.22808	-1.07131	-1.25106	-0.8849	-1.24454	-1.39009	-1.11747	-1.3188	-0.148376	-1.43903	-1.20964	-0.933772	-1.3152	-1.0475	-1.1247	-1.34515	-1.09099	-0.254812	-1.14642	-1.06794	-1.14797	-3.12834	-2.80937	-1.18696	-1.03075	-0.564722	-0.879362	-0.996594
-0.65945	-0.493468	-0.43223	-0.765968	-0.191197	-2.56618	-3.52434	-0.144679	-0.406001	-2.66126	-0.588958	-0.521962	-0.52636	-0.774278	-0.834785	-0.443486	-2.6286	-0.385217	-0.841471	-0.36937	-1.11568	-1.01288	-3.02216	-2.5615	-3.17557	0.140617	0.0263014	-0.5922	-1.90668	-0.468782	-1.01852	0.00186729	-0.510746	-0.834845	-0.576274	-0.990132	-0.499814	-3.27126	-0.038559	0.0631948	-2.48578	-0.124129	-0.327372	-2.49513	-0.459855	-0.228682	-0.270707	-1.01066	-2.8622	-0.415663
0.227798	1.1498	0.723377	-0.201672	0.388127	-0.0240612	-0.00935364	1.0127	-0.197564	0.287411	0.096962	-0.0595846	-0.55835	0.21488	-0.0833168	0.298018	-0.226372	0.030127	0.113032	0.0312977	0.300391	0.880615	-0.32675	0.266333	0.0273523	0.0987129	-0.0116329	0.488936	0.0589809	0.478883	-0.195607	-0.402573	0.141366	0.175877	0.0602403	2.60601	0.303452	0.061316	0.351421	0.477331	0.209868	0.515497	0.378682	-0.225759	0.015265	0.214519	0.368713	0.117447	1.00034	0.618728
-1.26705	-1.03928	-2.41938	-0.994175	-1.76907	-1.06159	-1.12245	-1.75079	-1.79935	-1.44166	-1.74666	-0.883881	-1.24605	-1.62124	-1.24978	-1.75506	-1.51174	-1.54405	-1.75579	-1.10577	-1.71204	-0.77096	-1.41061	-1.20009	-1.57794	-0.935977	-0.907944	-1.11037	-1.41519	-1.58708	-1.8227	-1.14334	-1.9595	-1.08497	-0.880323	-1.77391	-1.05142	-1.09228	-1.17424	-1.1738	-1.00449	-1.01728	-1.4003	-1.00338	-1.17828	-0.958649	-1.16127	-0.871643	-1.34588	-1.61328
0.952509	0.456699	-2.67201	0.769947	0.797061	0.607317	1.01577	0.459616	0.362804	0.346706	0.699021	0.594562	-0.0413141	0.433858	0.419323	-0.105513	0.633069	0.682403	0.368219	0.798417	0.877607	0.707161	0.794306	0.765879	0.71778	0.772554	0.895532	0.605379	0.652723	0.833877	0.38821	0.681315	0.522206	0.664474	0.980484	0.331131	0.68974	0.723742	0.991439	0.649094	0.766936	0.787917	0.628421	0.617043	0.626998	0.873461	0.951671	0.743037	0.662615	0.4376
-0.572496	0.142657	-0.262906	-0.663716	-0.191503	-0.350915	-0.330246	-0.0968909	-0.899073	-0.595155	-0.511124	-0.391499	-0.687242	-0.510512	-0.511767	-0.0229568	-0.709632	-0.758708	-0.378173	-0.660976	-0.1105	-0.298743	-0.480262	-0.246658	-0.386266	-0.56037	-0.379276	-0.0583725	-0.526119	-0.323396	-0.580868	-0.848299	-0.430561	0.0537128	-0.470973	-0.744184	-0.152606	-0.36338	-0.351722	0.259653	-0.185863	-0.212645	-0.404707	-0.565386	-0.423439	-0.338984	-0.0686197	0.417604	-0.328699	-0.475195
-1.129	-2.48633	-1.9661	0.0879354	-1.05288	-0.566092	-0.478106	-1.4438	-1.79354	-2.25564	-0.845245	-0.0894041	-3.10178	-0.180606	-1.54544	-2.32929	-1.30841	-0.658407	-1.81914	-1.27972	-2.22493	-1.65918	-0.229076	-0.888428	-1.39703	-1.0829	-1.25821	-1.1039	-0.333522	-1.36701	-2.02924	-1.02344	-1.48502	-1.66168	-1.13103	-2.81114	-1.46998	-0.764942	-1.65543	-1.76933	-1.05903	-1.34712	-1.41021	-0.242234	-0.722352	-1.03373	-0.834474	-1.80396	-1.37965	-1.57063
0.992906	3.05843	0.723759	1.04971	1.7093	1.13898	1.14466	2.43488	0.86433	0.906332	0.534711	1.5511	0.517112	1.08883	0.921228	2.28798	0.599996	0.510952	3.3759	0.630074	2.03414	3.75209	1.18469	1.61845	1.24682	1.71151	1.87843	2.03605	0.861351	1.29987	1.99354	1.22271	1.78174	1.39799	1.3692	2.68141	4.24016	1.18459	1.31577	3.68242	1.16644	1.45102	1.28211	0.459827	0.910053	1.03628	1.96069	3.16472	1.73278	1.53736
-0.0229092	1.31373	0.65025	-0.779956	-0.0503449	-0.726333	-0.515952	0.321989	-1.0279	-0.486953	-0.448256	0.191069	-0.296452	0.366122	0.670025	1.64754	0.258961	-0.942019	0.621881	-0.144622	0.391553	0.452394	-0.234283	0.176213	0.00937176	-0.643474	-0.0232859	-0.010088	-1.04035	0.16793	-0.0926232	-0.797489	0.508319	-0.674167	-1.18351	-0.796062	0.939075	-0.383391	0.107831	0.82707	0.356491	1.48081	1.3354	-0.606187	-0.0788703	-0.0442696	0.311642	0.505482	-1.32574	-0.235764
-3.10368	0.239939	-0.642808	-3.0151	-1.08738	-3.29824	-2.95458	-0.412918	-2.52579	-0.230724	-0.768013	-2.9537	-2.13022	0.196623	-1.73337	-0.641691	-2.09627	-2.17805	-0.506488	-1.64129	-2.02162	-0.804099	-2.9297	-1.08908	-1.35901	-1.56873	-1.3276	-1.20617	-0.933849	-1.17962	-0.747208	-2.79177	-0.956748	-1.03115	-2.57458	-1.45018	-0.041853	-3.86644	-0.798332	-0.84036	-2.90833	-1.28795	-0.847693	-2.12601	-2.7156	-1.01345	-0.514707	-0.422517	0.142484	-0.713824
0.00578499	-0.0325894	1.16391	-0.039525	0.616793	0.0439892	0.289765	0.364097	0.0803576	0.236507	0.264281	-0.00583839	0.212368	0.291364	0.0299559	0.8309	0.157775	-0.0134273	0.199807	-0.219231	0.166018	0.159819	0.222456	0.279257	0.25054	0.0453224	0.13038	0.531372	-0.0765181	0.203081	0.125688	0.116793	0.490352	0.575827	0.157768	0.268574	0.00621796	0.167707	0.430757	0.222565	0.191875	0.131146	-0.0312042	-0.348783	-0.287578	-0.045722	0.190222	0.235802	0.193576	0.00689745
-0.316832	0.727578	0.671193	-0.152526	0.633091	0.0516586	-0.190147	0.334644	-0.578932	0.220007	0.507629	-0.370404	-0.21985	-0.641632	-0.403343	0.9633	-0.885484	-2.63967	0.837852	-2.92544	-0.490667	0.64996	-0.143406	0.184371	-0.00401974	-0.418661	0.0316381	0.25336	-0.562969	0.380887	0.276459	-0.398852	0.311792	1.71417	-0.124857	1.48815	0.810873	-0.068913	0.609859	0.536379	0.135501	0.240515	0.382789	-2.51849	-1.32479	0.0403385	0.230782	0.848809	0.130353	0.428917
0.859183	1.36752	0.743341	0.67326	1.06307	0.645102	0.916834	1.39613	0.6475	0.653761	0.859775	0.828588	0.409866	1.01735	0.715992	1.20039	0.572807	0.475407	1.14615	0.357718	1.0136	1.08776	0.506917	0.888098	0.857492	1.16064	1.24863	1.52175	0.515348	1.02128	1.16953	1.09964	1.18669	1.59076	0.490724	0.651948	1.62632	0.802857	0.987824	1.31766	0.734715	0.677904	1.00759	0.277901	0.285762	0.815754	1.26275	1.34815	1.59917	0.955952
-2.29085	-1.62834	-1.16011	-1.58741	-1.55677	-1.88364	-1.46703	-1.5909	-1.24125	-1.58011	-1.26561	-1.90094	-1.754	-2.05927	-2.75754	-1.52829	-1.09588	-1.42149	-2.38408	-1.93883	-1.35297	-2.32899	-1.62083	-1.40566	-0.903322	-1.55569	-1.48108	-1.54266	-1.3808	-0.94322	-1.52148	-1.57873	-0.865367	-1.99047	-1.51881	-1.79031	-1.35783	-1.29442	-1.17871	-1.3083	-2.61669	-1.38697	-1.26379	-3.45127	-1.83097	-1.4743	-1.37445	-1.5633	-2.54062	-1.79436
0.543058	1.0638	0.533547	0.545811	1.04972	0.692346	1.11085	1.10619	0.383466	0.335084	0.224226	0.887828	0.251327	0.303801	0.466399	1.16029	0.467392	0.578096	1.02027	0.215107	0.554401	1.05478	0.598701	0.942571	0.757506	0.622165	0.876024	0.712129	0.740849	0.76954	0.249102	0.308746	0.669626	0.874832	0.751709	0.654005	1.61705	0.784889	1.05263	1.54796	0.865233	1.04004	0.846416	0.69373	1.01142	0.940332	0.959933	1.49763	0.162095	0.67984
0.363571	0.080503	-0.764734	0.591307	0.404022	0.411641	0.279063	0.335766	0.7507	-0.0763288	0.627262	0.696954	0.346766	0.376218	-0.0560493	-0.375495	0.321166	0.175294	0.441143	0.206692	-0.0609269	0.430759	0.333202	0.261398	-0.0119267	1.74101	1.42283	1.36935	0.277761	0.528387	-0.0742545	1.48277	0.093554	0.724624	-0.00747347	-0.273267	0.788754	0.488705	0.210845	0.421244	0.246304	0.0474043	0.17695	0.800847	0.227688	0.661527	0.627504	0.980943	-0.0352163	0.0866647
-0.247675	-2.34972	-1.82107	-0.339871	-1.01801	-0.358349	-0.454091	-1.32909	-0.353628	-0.503077	-0.169807	-0.628518	-0.550854	-0.807593	-0.676637	-1.4503	-0.263052	-0.843033	-1.34514	-1.35852	-2.96524	-1.31094	-0.538924	-0.770664	-0.816347	-0.0429726	-0.0819702	-0.533009	-0.430812	-0.399703	-0.781883	0.608356	-0.351185	-1.68214	-0.912534	-2.7659	-3.02156	0.0906186	-0.843974	-3.04462	-0.618295	-0.129928	-0.543003	0.0252523	-0.0916696	-0.623554	-1.64695	-2.81421	-1.35263	-0.575679
0.743015	0.851206	0.531181	0.736605	0.893595	0.774974	0.995309	1.10965	0.625326	0.592483	0.830629	0.619087	0.367062	0.484118	0.302728	0.741359	0.610435	0.536232	0.939586	0.392439	0.737883	0.761064	0.722302	0.925089	0.916699	1.04242	1.08746	1.17788	0.538898	0.837525	0.798436	1.06909	0.893717	1.6155	0.754226	1.05856	1.02832	0.829352	0.939509	1.05754	1.21841	0.790711	0.911134	0.406076	0.692735	0.951331	0.968719	0.936297	1.19059	0.709207
-0.123466	0.235135	2.21492	-0.308187	1.73071	-0.0788298	0.222886	1.33422	-0.166896	0.36547	1.32349	-0.126558	0.817032	0.0506291	0.187606	1.70298	-0.239107	0.304573	0.234464	-0.0172443	-0.00681448	-0.484716	-0.368908	-0.0724325	0.250126	-0.53749	0.38773	0.59194	-0.232914	0.711968	-0.216275	-0.597227	0.153555	0.602139	0.0622649	-0.289948	-0.335398	0.0850921	0.76239	0.557681	-0.0338869	0.660756	1.45646	-0.270594	-0.0378833	0.259867	0.240557	0.0183554	-0.825416	0.237231
-1.00831	0.817804	1.43193	-1.44754	0.264912	-0.980762	-1.00041	1.09431	-1.10762	-0.338503	-0.203819	-0.620965	-0.560084	-0.999425	-0.640608	0.755367	-3.44305	-1.04369	-0.885804	-1.13745	-0.938906	-0.813661	-1.17014	-1.01503	-0.9669	-0.391511	-0.282003	-0.00476933	-1.10373	-0.03936	-0.539569	-0.509466	-0.849357	0.386546	-1.23457	-0.444453	-0.178303	-1.05265	-0.256798	0.109686	-0.908783	-0.295484	-0.765885	-1.22136	-1.24994	-0.969307	-0.351243	-0.26938	0.913334	-0.304768
0.0633688	1.18616	0.415062	0.00826645	1.053	-0.108941	-0.0250025	0.60344	-0.412519	0.000201702	-0.099103	0.121964	-0.708727	-0.241106	0.171165	0.735361	-0.186562	-0.291867	0.377015	-0.00366879	0.119121	0.151685	0.0416441	0.156287	0.0832863	0.203215	0.437901	0.571212	-0.0373659	0.341932	0.0245614	0.11215	0.208349	0.461173	-0.343452	0.158947	0.896952	-0.189188	0.870024	1.66153	0.127797	0.534622	0.301589	-0.0749855	0.252225	0.514286	0.583266	0.855844	0.603855	-0.0544953
1.79339	2.50953	2.14709	1.75447	2.57437	1.66668	1.88966	2.40762	1.52576	1.75267	2.34975	1.83974	2.16586	1.90053	2.03778	2.66946	1.45851	1.7412	1.93715	1.02503	1.96064	1.58302	1.78963	2.04939	2.16634	2.03763	1.86595	2.33937	1.76211	2.40392	0.784011	1.89228	2.33924	2.08495	1.49889	2.14544	1.89483	1.9951	2.81193	2.69649	1.76594	2.19789	2.24671	1.36641	1.62059	2.02667	2.39929	2.36573	1.9823	2.2976
-0.707843	-1.9175	-2.29453	-0.726246	-1.08813	-0.98046	-1.19323	-1.05986	-1.59414	-1.24218	-0.983139	-0.255543	-2.15426	-1.15247	-0.761473	-1.53587	-1.00568	-0.747934	-1.32461	-0.793975	-1.12029	-1.36592	-1.04933	-0.928247	-1.40985	-1.10774	-0.796588	-1.78778	-0.928481	-0.615812	-2.74745	-1.23741	-1.4039	-1.91766	-0.57092	-1.24367	-0.829468	-0.98097	-0.877031	-1.46269	-0.71913	-0.752293	-0.949014	-0.740881	-0.573576	-0.512353	-1.02113	-1.74123	-1.07448	-0.87108
1.96236	2.18431	2.22592	2.00492	2.29098	1.86522	1.99373	2.07143	1.76389	2.03469	2.16959	1.73784	1.72269	2.41559	1.52262	2.2852	1.85487	1.8208	2.10892	1.51039	2.11934	2.11467	1.79387	1.98919	2.21357	1.96476	2.10403	2.25208	2.02166	2.32142	2.81125	1.89151	2.27282	2.93321	1.98348	2.0835	2.58022	1.9476	2.18815	1.97337	2.07503	2.07804	2.39473	1.63499	1.85462	2.15405	2.07114	2.41301	2.34819	2.3165
0.195857	0.108609	-0.0185933	-2.48694	-0.0287147	0.117704	0.172597	-0.20906	0.433262	0.219091	-0.37585	-0.498021	-3.34394	-2.6165	-0.477715	0.187998	-2.70913	-0.25408	-0.118915	-2.17894	0.123031	-0.489885	0.417753	0.235565	-0.359188	-0.646636	-0.649795	0.0470991	0.264073	0.0708542	-0.68492	0.299803	-0.445307	0.168918	-0.677167	-0.633091	-0.419405	-0.226595	-0.267793	-0.0417533	0.268218	-0.369375	0.0227098	-2.22018	-1.82153	-0.711245	-0.613326	-0.480358	-0.297247	-0.549439
0.429389	-1.8918	-4.01174	-0.00116253	-0.486146	-0.108755	0.266911	-1.31918	-0.583892	-0.741788	-0.807544	0.220725	-0.628081	-0.760152	-0.703629	-2.60397	-0.0458937	-0.638608	-4.12686	-0.398499	-0.0767999	-3.04393	-0.0538254	0.142221	0.0920601	-0.689274	-0.445993	-0.540787	-0.648358	-0.244193	-0.86501	-0.677224	0.173935	-1.34649	-1.29748	-2.69286	-1.77548	-0.126884	0.259322	-2.11995	0.479556	0.398745	0.211252	0.0255747	-0.1245	-0.527797	-0.814147	-1.85416	-2.12096	-0.845311
-0.202244	1.25957	1.01138	-0.134433	1.18448	-0.21063	0.698956	1.29964	-0.284387	0.100742	0.567159	-0.405119	-0.476583	0.0811543	0.0361137	0.246604	-0.137671	-0.0631213	0.320947	-0.311421	0.342932	0.378158	-0.0811424	0.464601	0.176318	-0.354516	0.0151634	0.299369	-0.25471	0.792079	0.407686	-0.0249367	0.817708	0.82672	0.0990815	-0.434422	0.15505	-0.199398	0.928058	0.863353	-0.135384	1.38756	1.44212	0.00561333	0.112203	0.299886	-0.0474663	0.134692	1.15843	0.609231
0.612689	1.19364	-0.399475	0.382737	0.62467	0.446964	0.521132	1.14097	0.144047	0.45901	0.347382	0.789399	0.125932	0.31215	0.875911	0.743876	0.14722	0.492303	0.643074	0.571905	0.545818	0.493316	0.456531	0.932969	0.70742	0.664804	0.858611	0.721451	0.638961	0.899487	-0.0558	0.617012	0.782966	1.05834	0.522217	0.936333	0.965848	0.39538	0.702593	0.844521	0.897487	0.80887	0.867457	0.394004	0.562996	0.734116	0.980663	1.08741	1.10541	0.754993
3.86847	-0.327172	-2.6463	4.0507	2.30548	3.52007	3.77373	1.07647	2.74755	3.3837	2.14109	3.01808	1.77386	2.60636	2.79651	1.43126	3.22788	3.19217	1.55045	2.91768	2.32914	1.96192	3.32729	3.02915	2.7978	2.55029	2.74089	2.11279	3.19923	2.70744	1.50245	2.76121	3.27291	2.09061	3.24983	-0.577717	-0.137718	3.77268	3.06521	0.0917115	3.37282	3.46259	2.7489	3.02665	3.24583	2.99266	1.60192	1.2001	2.00959	2.95987
-2.05924	-2.97051	-1.52087	-1.08627	-1.12415	-3.43749	-2.26323	-0.682486	-0.339754	-2.13496	-1.92712	-0.485033	-0.932629	-2.27409	-2.29908	-1.10241	-2.77433	-2.27069	-3.71538	-2.5253	-3.57667	-2.65701	-1.20005	-3.06494	-2.7687	0.402429	0.0232229	-0.314949	-1.1624	-2.35961	-2.93383	0.562714	-2.01544	-1.35287	-1.20317	-2.39225	-3.46521	-1.81546	-4.17797	-3.27132	-2.03415	-2.54512	-1.41333	-1.07007	-3.20131	-1.12087	-1.02792	-0.576827	-1.13021	-1.32685
-1.20477	-1.17271	-1.53664	-2.66364	-0.719075	-1.48769	-1.60652	-1.2106	-3.0871	-0.706787	-0.721663	0.331349	-2.3316	-4.01726	0.469965	-2.0592	-3.25654	-2.44837	-3.07322	-2.54327	-2.71157	-1.69897	-2.61307	-2.84426	-0.17592	-0.88641	-1.16433	-1.35581	-2.30458	-0.693057	-1.34661	-2.64123	-2.95307	-1.25674	-2.73024	-2.83993	-2.6544	-2.43222	-2.80977	-1.10564	-1.09818	-1.2289	-0.656907	-1.24144	-2.48473	-0.281889	-1.64057	-0.762913	-1.32263	-2.62267
-0.0316067	-3.13822	-3.82235	-0.579273	-0.619527	-0.665175	-0.139977	-0.757485	-0.531714	-0.268403	-0.59843	-1.10233	-3.01093	-1.05376	-0.422073	-2.22872	-2.79056	-1.23322	-3.47528	0	0.0403018	-0.393921	0.0234118	-0.33756	-0.151409	-1.27966	-0.556602	-1.03453	0.32957	0.712237	-1.96588	-0.732406	-0.139055	-1.39192	0.576328	-2.9754	-1.69797	-0.491051	0.188329	-0.725028	-0.29513	0.639081	0.249554	-0.464334	-0.0938001	-0.0502214	-0.278319	-0.4889	-3.51308	-0.615368
3.86138	1.7948	2.37852	4.29751	3.78911	4.27767	4.30731	2.68042	3.75043	4.0172	3.47695	4.0687	3.02191	3.81932	3.08412	2.11559	4.03177	3.92874	2.5368	2.85666	3.60996	4.17871	4.16736	3.76044	3.98086	4.21098	4.15363	3.68462	3.85488	3.49672	3.20627	4.0247	3.6972	3.89823	3.85826	2.57463	3.2412	4.30668	3.87268	3.27584	4.25298	3.8681	3.47027	3.8195	3.63152	3.83904	3.65998	4.16741	3.03545	3.23142
0.933383	1.16501	0.70494	1.22695	1.20802	1.06068	1.10363	1.08536	0.327495	0.66378	0.579872	1.29066	0.715883	1.15268	0.632341	1.83961	0.626666	0.526252	1.25776	0.202857	0.829512	1.47947	0.991454	1.07435	0.982104	0.778862	1.03728	1.12897	0.76124	0.780094	0.502273	0.582423	1.18203	1.42835	1.08494	1.21995	1.5455	1.06641	1.40331	1.51717	1.46857	1.04968	1.09317	0.66593	0.939359	0.862316	1.15428	1.03098	1.12456	1.18795
0.0813808	-2.18858	-2.62325	-0.194681	-1.18317	-0.150014	-0.728385	-1.88158	-0.804538	-0.530872	-0.627198	-0.780604	-1.06199	-0.64185	-1.04173	-2.52069	-0.713198	-0.43062	-2.41056	-1.13141	-1.25305	-2.99412	-0.519321	-1.11033	-0.976771	-1.01792	-1.42598	-1.42104	-0.417924	-0.771902	-2.03175	-0.884309	-0.86686	-1.51547	-0.4913	-2.92196	-2.5169	-0.508784	-0.673889	-1.85442	-0.653021	-0.546556	-0.816566	-0.414229	-0.0957856	-0.222694	-1.49093	-2.44094	-1.39233	-0.754449
0.788272	-0.567072	-0.712302	0.729259	-0.0857081	0.910045	0.88332	-0.334748	0.358597	0.665537	-0.215687	-0.0645313	-0.547536	0.0627303	0.326769	-2.35402	1.04295	1.0069	0.457125	0.244606	0.543551	0.537333	1.0503	0.817619	0.52578	0.245761	0.367286	0.130312	0.926281	0.420641	-0.503645	0.569809	0.838518	-0.291865	0.620663	-0.81331	-0.633847	1.13658	0.601631	0.00840712	0.873066	0.827585	0.356693	1.36021	2.37341	0.739503	-0.341725	-0.87334	-0.00174618	0.529739
2.2224	3.08721	-2.97807	-0.530293	-2.26645	1.47314	0.222211	-1.46618	-3.19315	-0.651193	-1.5959	0.466039	-2.5581	1.37297	0.310075	0.715767	-2.44553	-2.45199	-2.48246	1.94233	0.457917	-0.762298	1.02486	-0.274921	0.0481062	1.41056	1.56604	-1.87851	-0.254645	0.778663	-2.36747	-1.49288	-0.435176	-2.00877	2.18878	1.74063	-3.0111	0.279219	0.0103111	-2.20815	5.34676	-1.26005	0.286174	2.12472	-2.68314	-1.46391	1.9556	-0.655289	3.04056	2.6673
-0.21623	0.607498	0.530279	-0.401326	0.0600305	-0.316546	-0.344143	0.508582	-0.797692	0.0116696	-0.329822	-0.604016	-0.402718	-0.227005	-0.536099	-0.054657	-0.57723	-0.277184	-0.157353	-0.516768	-0.315255	-0.20222	-0.276117	0.379393	-0.293609	-0.229544	-0.086648	-0.00527	-0.361473	-0.143291	-0.68374	-0.259653	-0.149918	0.035984	-0.325103	0.856554	-0.194461	-0.214594	-0.0125914	0.181565	-0.0429049	0.212247	-0.0482292	-0.552652	-0.46515	-0.197961	-0.318733	-0.239608	0.842744	0.116748
-1.12468	-0.355227	0.09059	-0.812606	-0.407337	-1.2394	-0.748212	-0.561288	-1.13261	-0.00120306	-1.60835	-0.522677	-0.648225	-1.19107	-0.5608	-0.0885	-0.876713	-0.241229	-1.08638	-1.38909	-1.1393	-0.643847	-0.905569	-1.06965	-1.42853	-0.96543	-0.986325	-0.634	-0.912128	-0.926567	-0.982756	-0.87535	-1.02783	-0.652892	-0.342058	0.0930882	-0.712577	-0.936533	-0.785591	-0.800095	-0.742505	-0.502027	-1.00894	-1.0199	0.0228505	-0.729024	-0.573349	-1.0238	0.147297	-0.430783
1.24342	1.47504	1.20695	1.27873	0.697903	1.12613	1.08231	0.870542	0.98164	1.00513	0.245577	1.8257	0.738799	1.10149	1.26867	0.645196	1.17694	1.39011	0.854091	1.17254	0.998902	1.3116	0.991378	1.19649	0.869685	1.53927	1.57547	0.836722	1.30848	1.02978	0.785085	1.21118	1.18465	1.02543	1.16531	0.896564	0.919217	0.855206	0.809081	0.680281	1.31823	1.12268	0.489155	1.2362	1.38875	1.20241	0.999681	1.18531	3.13976	1.68534
0.382091	0.124321	0.227264	0.190609	-0.273709	0.150155	0.505663	0.40716	-0.0127697	0.545804	-0.0681248	0.168272	-0.521004	-0.243942	-0.567334	-0.344713	0.000162125	0.0643659	-0.611571	0.0725365	-0.261386	-0.128702	-0.261668	-0.191813	-0.993282	0.658537	0.331489	0.238471	0.451376	0.591435	-1.58774	0.530479	-0.359282	0.00607204	0.350749	-0.575315	-0.34294	0.213882	0.273269	-0.114216	-0.311317	0.34551	-0.15777	0.0934925	0.266103	0.306332	0.493936	-0.595573	1.23387	0.278138
3.96506	-0.59813	-3.15471	5.22169	5.7806	4.08179	4.00948	4.19752	5.51583	3.52828	5.13123	3.32699	4.30163	3.76638	0.328443	-0.645829	4.22716	3.73672	0.370058	3.21483	2.88049	-0.408702	3.87463	2.03207	2.2609	5.04851	4.47942	4.21966	3.28627	2.98212	0.325089	5.80916	4.03311	4.17361	1.43844	-0.739151	-0.899011	6.03894	4.18651	1.43256	3.13832	3.35608	3.84988	4.57342	3.06919	4.51653	1.72631	1.90397	2.4168	2.67502
4.99503	6.46028	6.58696	4.75755	5.62198	4.95293	5.43115	5.93806	4.88091	4.86422	5.23351	4.65283	4.85091	4.60728	4.31806	6.45941	4.62726	4.45679	4.98707	3.89456	4.87943	4.75591	4.78582	4.92693	5.34923	5.35561	5.2265	5.73376	4.65788	5.2778	4.94914	5.09925	5.52561	5.88454	4.79199	5.19216	5.88266	5.18499	5.73259	5.52441	4.69787	5.2151	5.38099	4.49278	4.78817	5.49137	5.63076	5.82901	5.92201	4.75313
6.37055	2.41324	1.58685	6.48605	5.30964	7.06621	7.11251	4.83824	6.17591	6.39786	5.52827	5.80379	4.05872	5.44375	5.70507	3.42999	5.96391	6.19849	4.54306	5.57646	5.57033	5.23525	6.2226	6.19845	6.39479	5.91383	6.15576	4.69556	6.44874	5.78949	4.468	6.42639	6.27344	5.3336	7.01444	3.73959	3.48019	6.60078	6.03002	4.42828	6.47582	6.70663	6.12881	6.04115	6.47747	6.34607	4.62285	3.49382	4.72344	5.27344
4.84006	4.13629	3.64011	4.77482	4.26149	4.9949	4.83132	3.90868	4.02188	4.42761	3.95179	4.227	3.82777	4.56481	3.73806	3.25003	4.39633	4.44366	3.7276	4.00536	4.07517	4.06093	4.52385	4.3955	4.29214	4.39749	4.18132	4.56033	4.38957	4.44331	3.70823	4.26476	4.33097	3.97877	4.23445	3.48096	3.34423	5.033	4.60703	4.20596	4.49154	4.5973	4.36855	4.1284	4.06475	4.46008	3.98201	3.72295	3.84543	3.92561
1.51274	0.306952	1.27707	2.18814	1.32444	2.19096	2.49625	0.96084	2.0662	2.13134	1.9039	1.93487	1.69804	2.00665	1.14794	0.925829	2.0387	2.23463	1.58377	1.17568	1.62811	1.91865	1.96811	1.74061	2.02419	1.56386	1.83381	1.19641	1.90943	1.36011	2.80827	1.70199	1.82543	2.18913	2.19611	1.64672	1.57852	2.12386	1.91412	2.00829	1.50322	1.39655	1.43947	2.12695	1.83995	1.5979	1.62632	1.29497	1.06	1.83843
1.04681	2.86266	2.83887	1.27731	3.80535	0.625455	1.4424	3.65295	1.84131	1.81204	3.00413	1.2521	2.93005	1.45813	2.065	3.12044	1.34276	1.20803	2.95687	0.885334	3.28772	3.56651	2.02479	2.33324	2.77323	1.95635	2.89525	4.5541	1.0443	2.65761	2.12418	1.99736	3.81854	2.89463	1.84012	1.9871	2.1481	1.54382	3.92472	3.09518	0.773491	2.2858	2.75447	0.941309	1.63958	1.64633	2.68391	2.49989	0.67204	1.94252
0.866511	2.45664	1.0795	0.188922	1.95919	0.24467	0.970248	1.63319	0.0431919	0.922123	1.55988	0.100001	1.82392	3.16557	2.38847	2.19538	1.20246	0.0785813	2.66725	0.335268	2.77045	3.05778	1.17966	1.51425	2.25916	-0.112975	0.572078	1.51866	0.867197	1.80771	3.74319	-0.00321674	2.74124	1.87273	-0.157477	1.74089	1.82877	0.268979	1.28891	1.38898	0.753689	0.872742	1.79639	0.0556202	0.118436	1.1841	1.35375	0.559451	0.931108	2.59814
-1.82229	-2.50482	-3.1104	-2.25897	-2.04873	-1.71319	-2.3079	-2.28545	-2.12722	-2.15845	-2.05774	-2.43107	-2.34511	-2.53772	-2.36055	-2.713	-2.437	-2.11135	-2.34356	-2.15545	-1.93402	-2.25863	-2.67364	-2.08155	-2.3218	-1.43946	-1.54086	-1.59971	-2.00614	-1.9011	-2.59745	-1.61922	-2.37532	-2.02242	-2.36603	-3.6279	-2.14522	-2.93011	-2.32081	-2.18518	-1.94531	-1.71752	-2.06112	-1.98825	-2.22791	-1.91269	-2.8604	-1.42152	-2.19125	-2.43381
1.37316	-0.535786	-0.436265	1.30363	0.0768991	1.61692	1.42197	-0.303874	0.899467	1.23846	0.270866	1.34913	0.16629	0.762713	1.56059	-0.0201664	1.25878	1.07284	-0.053874	1.54715	1.19269	-0.0559225	1.38765	1.48143	1.12273	0.880596	0.932099	0.53723	1.24739	1.12218	-0.371467	0.685023	1.07427	0.078269	1.54302	0.0208187	0.308421	1.05735	1.11596	0.0857778	1.29775	1.27483	0.99197	0.799146	1.05288	1.01702	0.60304	0.0424881	0.569963	0.639921
4.43387	5.69944	5.6015	4.72027	5.08544	4.69611	4.7574	4.61213	4.14179	4.43595	4.74833	4.23104	3.9251	4.42911	3.91935	5.32007	4.25638	4.12176	4.40053	3.52311	4.35801	4.5727	4.35263	4.55171	4.69488	4.68644	4.72938	4.80776	4.29514	4.42886	4.70273	4.60752	4.60432	5.27598	4.616	4.6968	4.63266	4.76253	4.96059	4.5628	4.5249	4.56522	4.64081	4.16516	3.84963	4.70799	4.35284	4.89292	4.76663	4.17874
2.7756	2.04913	0.894483	2.62985	2.21623	3.08069	2.72234	1.82656	2.33915	2.5095	2.35282	2.34378	1.8638	3.23346	2.42107	1.5259	2.73631	2.5622	2.52346	2.16999	2.60346	1.89151	2.58478	2.6501	2.95177	2.25924	2.15654	2.90381	2.75217	2.58164	3.36828	2.58421	3.04147	2.43392	2.93771	1.38997	1.5066	2.50162	2.51875	1.34738	3.42619	2.08894	2.45446	2.40238	2.14983	2.49767	2.31704	1.97474	1.86589	2.61929
0.568829	0.00379896	2.06669	1.65516	0.39328	1.42427	1.49123	0.351914	0.959411	1.20051	0.486923	0.592259	0.643189	-0.207384	-1.13729	-1.10431	1.17902	0.702481	0.495044	0.100171	1.09337	1.63171	0.681248	0.546663	0.304607	0.346029	0.563631	0.538627	0.694833	-0.0380821	0.0709224	2.22703	1.87084	1.95777	0.265657	-0.382874	-0.702994	0.997592	0.288401	0.778725	1.4492	-0.0930567	-0.372546	1.43167	0.635544	0.256113	-0.138641	-0.564418	-0.166613	-0.370991
-0.962059	-1.93989	-1.61181	-0.717584	-1.33991	-0.632335	-0.778913	-2.45566	-1.07018	-0.881642	-2.98948	-0.846071	-0.955886	-1.4864	-3.47062	-2.1456	-0.412323	-2.25118	-1.54361	-3.15977	-1.02734	-1.51359	-2.34365	0.0603333	-0.838561	-0.0707445	-1.55847	-1.41334	-0.578547	-1.32648	-0.465684	-0.76672	-1.44103	0.259549	-0.684382	-2.65712	-2.21699	1.17021	-2.44687	-1.70347	-0.758544	-1.5396	-2.13478	-0.361474	-0.911329	-1.77329	-1.02125	-1.26868	-2.84398	-3.45739
-1.82509	-1.1371	-1.33975	-1.66285	-0.2176	-1.63676	-1.33885	-0.477163	-1.2526	-1.35029	-0.376372	-0.792691	-0.444907	-1.65039	-2.72679	-1.20378	-2.47469	-3.4643	-1.2655	-2.72559	-1.40804	-1.54671	-1.4962	-1.33111	-1.05728	-0.944452	-0.839614	-0.789561	-3.14277	-1.32502	-0.955759	-1.3081	-1.01185	0.0868845	-1.52877	-1.3662	-1.34291	-1.15621	-0.792369	-1.20446	-0.888977	-1.13921	-1.08933	-1.09863	-1.32101	-1.351	-1.00168	-0.87219	-1.59507	-1.21842
3.29995	1.74368	0.558682	1.77389	3.67606	1.16332	1.90385	3.0812	1.22849	2.0927	3.55114	-0.000100136	2.52415	5.19215	4.07776	3.45403	3.88268	2.42566	5.19307	2.32949	4.77608	2.58416	3.07182	3.82133	4.85195	0.868122	0.722029	2.71571	2.90411	3.94891	6.30912	1.4559	5.49189	0.946719	0.67736	1.07497	3.29199	1.51811	2.6893	2.00163	1.96319	2.333	4.132	1.54303	0.844374	2.56436	1.54202	0.608243	2.14795	4.85124
-1.87243	0.0921512	0.314826	-1.50331	0.420782	-2.3288	-1.85372	-0.603302	-3.09002	-2.81651	-3.67781	-1.85022	-1.83564	-2.74364	-3.28565	-0.71242	-2.09036	-1.9847	-1.02128	-2.70489	-2.85717	-1.63758	-3.01611	-1.15636	-1.18205	-1.8888	-1.22606	-0.90903	-2.90783	-0.761425	-1.02313	-1.56513	-0.483131	-0.762718	-1.65348	-1.03713	-1.65103	-2.38242	-0.213417	-0.362643	-2.8103	-1.65073	-1.0375	-3.03848	-2.38908	-1.15214	-1.94289	-1.16715	-0.951412	-0.918587
5.21847	3.49898	5.81556	5.95749	4.069	6.09879	6.23729	3.56876	5.28087	5.63199	4.96056	5.96397	4.65147	4.46596	3.62124	2.53121	5.84211	5.21025	4.83857	4.32538	4.93819	6.93377	5.45187	5.29161	4.97096	5.09922	5.74734	4.6332	5.43395	4.5008	4.86363	5.20959	5.14169	4.62338	5.1669	4.50249	4.46358	6.14477	5.10692	4.73769	6.18068	4.82685	4.20818	5.74372	5.33885	5.43171	4.25757	3.20103	4.70985	4.18761
6.75044	6.01804	8.28829	8.36759	6.86849	8.08416	8.51081	5.93593	7.39967	7.90175	7.16598	7.2768	6.05287	5.93948	4.70211	4.32852	7.66669	6.91092	6.56442	5.86301	8.25137	9.17236	8.06864	8.10384	8.35113	7.40573	8.08489	7.44983	6.84695	5.86506	6.80163	6.95014	7.47973	7.16347	6.42357	6.31243	5.80268	7.59041	6.47581	6.87371	7.41616	6.34739	5.94753	8.03058	7.48276	7.12106	7.27149	6.09511	6.30824	5.5371
5.21658	3.77314	7.24692	6.70985	4.58842	6.13464	6.3942	4.76559	5.96949	6.43505	5.32309	5.52837	4.36589	3.96183	3.27285	3.41543	5.95937	5.50833	4.88507	4.49236	5.28262	6.91282	6.3708	6.10032	5.64715	5.3965	5.99257	5.31424	5.30496	4.18103	4.31469	5.07526	5.53114	4.23687	4.39941	3.83535	3.9724	5.89654	4.38029	5.06722	5.71673	4.76054	4.19602	6.64518	6.1169	5.44182	5.62778	4.17555	4.72093	3.833
1.70924	0.443979	2.78429	2.53085	0.854729	2.78602	3.08151	0.691191	1.7457	2.15636	1.36237	1.99027	1.14625	0.544363	-0.131525	-0.707567	2.55765	1.89969	1.66047	0.205514	1.31714	3.47034	2.43062	2.03235	1.85976	1.48297	2.0867	1.48217	2.39741	1.37274	1.73346	1.33892	1.88917	1.19116	0.914219	0.716665	0.408414	2.46362	1.04628	1.61277	2.26111	1.32739	0.805415	2.57264	2.02677	1.44624	1.27318	0.182938	1.14378	0.66947
-0.323497	1.03384	3.26998	-0.242102	0.111306	-0.0552254	0.277014	0.382145	-0.499609	-0.374927	0.0320635	-0.728268	-0.138919	-0.124221	-0.467478	1.48948	-0.702441	-0.686882	-0.107658	-0.644735	0.194141	0.977257	-0.617483	-0.175571	-0.331715	-0.404222	-0.0475969	0.0985813	-0.742517	-0.158706	0.651709	-0.212942	0.431799	0.456322	-0.937884	-0.171304	0.309017	0.0270371	-0.765615	0.641524	-0.148471	-0.425021	-0.277737	-0.0381527	-0.11237	0.0270672	0.672696	0.488929	-2.50352	-0.382308
-2.57521	-2.26617	-2.18813	-2.11834	-1.80219	-1.6127	-1.8345	-2.17131	-1.57044	-0.0840106	-2.06117	-1.76643	-1.43686	-2.22604	-2.5379	-1.15714	-2.03276	-1.56257	1.55394	-1.66919	-3.01366	-1.80672	-1.85845	-1.81065	-1.72682	-1.79335	-2.16049	-2.49684	-1.85215	-1.979	-1.10678	-2.26089	-2.01215	-1.50941	-1.80557	-1.49869	-1.94837	-2.12448	-2.05468	-0.721925	-1.50019	-1.9755	-3.76812	-2.55866	-1.84203	-0.962441	-2.33222	-0.651	-3.25292	-2.06776
-0.142987	-0.257952	0.103719	0.248324	0.231923	0.0350838	-0.176506	-0.354926	-0.414304	-0.674282	-0.311438	-0.247512	-0.721607	-0.116148	-0.556736	-0.428818	-0.0460463	-0.173368	-0.609478	-0.391937	7.20024e-05	-0.051897	-0.0430298	-0.059145	0.069108	0.130349	0.075798	-0.26188	-0.180352	-0.306109	-0.13575	0.185301	0.15065	-0.145776	-0.55559	-0.714911	-0.575039	0.11542	-0.0848875	-0.128982	0.0314217	-0.229258	-0.407697	0.0287361	-0.804758	-0.296475	-0.00440025	0.379146	0.717628	-0.0953584
-0.522143	2.46347	0.243203	-0.369064	1.01317	-0.469251	-0.136171	0.303593	-3.25298	0.237368	0.0935364	-0.128954	0.517075	0.209301	0.581285	1.76921	-0.465242	-2.14915	0.797603	-0.775006	0.663109	0.237612	-0.0377369	0.122089	0.174935	-0.633148	-0.106753	-0.0938845	-0.102076	0.534481	0.853346	-0.713999	0.197932	-0.220348	-0.22837	-0.136247	0.221735	1.16861	-0.220155	0.601296	-0.0362558	0.393997	0.457055	-0.45813	-0.197976	0.279293	1.16008	0.353561	-0.546763	0.434273
3.97551	5.39206	6.07955	3.60472	4.98261	3.35429	4.00632	5.11244	3.52997	3.76048	4.81611	3.54393	3.3407	3.32366	3.20429	4.69047	3.6355	3.5477	3.53276	2.63665	3.89086	3.3904	3.53718	3.75653	4.01177	3.3917	3.94267	4.47783	3.22069	4.56696	3.59092	3.81868	4.17955	4.38706	4.08297	3.51159	3.42679	3.53368	4.53528	4.5224	3.425	4.77437	5.15301	3.33358	3.73032	4.13327	3.46102	3.99804	4.61254	4.64395
-1.33597	-0.0647092	0.91314	-1.17448	-0.0754533	-1.63559	-0.497864	0.256303	-2.1863	-1.51123	-0.84388	-1.4325	-2.90322	-1.47612	-2.62659	-0.778428	-0.738931	-1.44849	-1.07352	-1.91492	-0.885344	-0.753082	-2.07648	-1.73314	-1.08483	-1.16581	-1.33699	-0.660641	-2.10814	-1.36806	-1.28188	-0.905386	-0.0840163	-0.142428	-2.58316	-1.70974	-2.33748	-0.908821	0.929871	1.27184	-1.75463	0.169031	-1.19178	-1.77617	-2.9366	-3.16754	-1.37527	-1.63941	-1.03239	-1.33827
1.82587	0.374271	5.03712	1.64108	3.04895	1.63458	1.96596	2.6457	1.10876	1.47916	2.26375	1.25989	1.00461	1.01609	0.872034	2.78876	1.9256	1.32337	-0.884144	1.04757	2.00468	-0.0386705	2.1612	1.67497	2.0855	0.472617	1.24093	2.08744	1.25038	1.87915	0.812839	1.17936	1.60489	2.37037	1.53585	2.60535	0.0163107	1.8438	1.44975	1.53315	1.49737	2.18383	1.38158	0.847456	0.263917	0.652016	1.8104	0.780137	1.46406	2.4316
-1.19912	-3.42789	1.85115	-2.17361	-0.0607533	-1.70682	-1.38031	0.0859113	-1.9577	-2.17669	-0.308618	-2.10847	-1.40369	-0.751594	-2.10639	0.702124	-2.23877	-2.19935	-2.91077	-2.63624	-2.03729	-2.12187	-1.67296	-1.10315	-0.909027	-2.56943	-0.800982	0.21815	-0.623395	-0.182974	-2.51301	-1.46555	-1.45959	0.518131	-1.78037	-1.17377	-3.00353	-1.62626	-3.23943	-1.64899	-0.388132	-0.492685	-0.629858	-0.857103	-1.11698	-0.615625	-2.55517	-3.73358	-0.904446	-0.166473
3.12507	1.73878	6.14027	2.64049	4.08816	2.47938	2.69533	3.67886	2.36776	2.6974	3.9577	2.85836	2.89301	2.2274	2.67915	4.64918	2.98312	2.6547	1.06111	3.16972	3.45895	1.4768	2.96858	2.83215	3.06711	1.34636	2.14715	3.01748	2.64154	3.26227	1.954	2.27067	2.95558	3.2386	3.0405	3.41007	1.61285	2.19805	1.98131	2.24689	2.63131	2.94159	2.55622	2.465	2.14846	1.90772	3.32132	2.4307	2.69604	4.18128
1.09151	-0.432687	3.02315	-0.523928	1.16043	0.3205	0.326191	0.790888	-2.81828	-0.538011	0.922421	-0.0402365	0.558099	0.089623	-2.231	1.915	-0.186553	0.0726409	-3.40623	0.359904	1.24655	-3.22127	-3.0889	-2.96139	-3.51716	-3.37595	-0.378104	0.173965	-0.0767546	0.700403	0.322815	-0.751859	-0.81518	0.605045	0.499257	0.701722	-1.55346	-0.0612845	-0.0731192	0.12429	0.751381	-0.158937	-0.287591	-0.179084	-0.0526252	-0.109159	0.661489	-0.0455189	0.504515	1.50612
7.43703	5.26702	3.30636	8.17934	6.33825	7.09361	7.95457	5.69395	7.25073	7.37956	6.33557	6.10577	5.14594	5.53811	5.15267	3.71832	7.65618	8.22519	5.42696	8.3019	7.49672	6.43978	7.87199	8.50665	7.93571	5.76061	5.44766	5.66753	7.45842	6.61748	5.69492	6.13637	5.95197	5.37721	7.66659	4.79312	5.52882	7.61591	6.06386	5.12109	6.99408	5.67044	5.99696	7.82022	7.4636	6.58961	7.01382	5.63123	6.26087	6.41562
4.38886	5.12108	4.23446	4.60051	3.93141	4.08949	4.34462	3.67167	4.64473	4.16923	4.65597	4.44302	3.88645	4.91554	2.61279	3.26207	4.39664	3.36856	4.11715	3.38442	4.31832	5.02839	3.87931	3.91352	3.48688	5.26668	4.56599	4.58809	3.61948	3.35215	4.27667	5.60362	3.93837	3.90094	3.59226	4.27076	3.82251	5.09198	4.38562	3.39517	4.36404	4.3273	4.10308	4.50117	3.35825	4.13938	3.57564	3.07527	2.91115	3.1581
1.56125	0.61435	0.746894	2.3289	1.59529	1.93445	2.01518	1.93324	2.18738	1.91119	2.18898	2.24338	2.19717	2.38897	1.60757	1.78766	1.84399	1.44612	-2.91313	1.59889	1.64953	0.724377	1.47376	1.26178	1.59744	2.87669	2.44266	2.67058	1.5372	1.55231	0.624369	2.70511	1.80269	2.14321	1.44641	-2.60387	0.215214	2.62512	1.9964	1.04839	1.51886	1.99962	2.37932	1.78213	1.63858	1.87449	1.73465	1.2287	2.73764	1.51944
7.6703	6.40097	4.19939	7.40148	6.31133	7.23967	7.40881	6.12187	6.88862	7.24254	6.4883	6.8766	6.07777	7.20792	6.65363	5.66362	7.05404	7.35738	6.18077	6.92916	7.07603	6.54955	6.92731	7.09597	6.79821	7.16591	6.8713	6.7262	7.53366	7.53098	6.19627	7.10553	7.1075	6.40868	7.54054	4.83319	6.32391	7.45313	7.30442	6.88383	6.9179	7.3614	7.19505	6.99905	6.99915	7.55784	6.9	6.69909	6.51173	6.74877
4.71999	5.49088	8.96177	4.85599	7.76628	3.91908	5.23021	4.29758	4.69039	4.75771	4.37247	3.53321	4.08035	4.06571	3.83668	4.86014	5.02569	5.23712	5.07566	3.10311	5.13718	6.40558	6.37116	6.28081	5.69456	4.84897	5.94361	7.02509	5.08566	5.39647	6.24513	4.44307	6.66452	4.10517	2.57558	4.42837	4.73665	4.98036	4.37741	5.32879	4.91603	5.88403	5.50133	4.01148	3.19033	5.26856	5.41135	4.32865	5.72405	5.35381
5.43888	6.28406	10.3919	5.56221	8.58989	4.59181	5.95362	5.18421	5.3827	5.20122	4.91661	3.93745	4.63479	4.71284	4.23635	6.09749	5.61233	5.69252	5.67667	3.78684	6.01411	7.27522	7.03468	6.93535	6.19756	5.45733	6.4671	8.15753	5.65538	5.95225	6.71659	5.17949	7.40243	4.78929	3.17765	5.21091	5.37612	5.58156	4.96149	5.9282	5.35713	6.42843	6.09478	4.46882	3.48215	5.73975	6.00471	5.12498	6.4101	6.01123
4.81869	5.76062	9.31353	4.99555	8.0812	4.1045	5.27091	4.44308	4.66918	4.76884	4.28208	3.31707	3.99756	4.24941	3.69929	5.64077	4.94641	5.1915	5.09319	2.9499	5.59355	6.85086	6.49251	6.51123	5.84746	4.819	5.89659	7.55497	4.95306	5.34178	6.15608	4.51786	6.80362	4.15705	2.27422	4.54952	4.73497	5.08113	4.42673	5.35707	4.98011	5.97958	5.63598	3.9515	2.86448	5.29319	5.43812	4.46686	6.02046	5.29005
2.76539	2.68736	4.95199	3.84274	2.45515	3.65848	3.48588	2.77355	3.12625	2.77542	2.39907	3.22217	1.54811	1.96574	0.340477	1.21916	3.4654	3.26769	3.33113	2.00696	2.91052	4.91071	3.52177	3.37767	3.027	3.24296	3.52575	2.91933	3.31381	2.18164	2.79721	3.15534	3.60711	2.58554	2.00719	2.34314	1.62098	3.51097	2.76076	3.74239	3.77183	2.85232	2.29501	3.15474	2.23889	2.22966	2.7453	1.47667	2.07864	0.962286
1.93605	0.41331	3.0747	4.11211	2.22523	3.24569	3.93291	1.53115	3.31929	3.41911	3.0601	3.73542	2.93639	1.92204	0.901912	0.424998	3.49183	2.84088	2.68664	0.830149	2.11659	4.19904	3.56948	3.4499	3.236	3.20691	3.75764	2.7284	2.60062	1.56749	1.65252	3.06677	3.11363	2.39493	2.49509	1.96697	1.92797	3.13834	1.90239	2.36337	2.33853	1.40495	1.2355	4.77859	4.49661	3.6292	3.28234	1.99427	2.02485	1.51742
5.19331	3.89097	6.37765	5.84059	4.60794	5.30615	5.6963	4.01257	5.65106	5.0487	5.40793	5.05067	4.4116	4.67841	2.43733	2.18538	6.02821	5.58982	4.38523	4.5629	5.42914	6.09392	5.71664	5.70084	5.39316	5.21682	5.14046	4.91317	5.487	4.70094	5.16131	5.87317	5.76561	5.21376	4.4545	3.60298	3.73446	6.17488	4.74465	5.50455	5.40958	4.60336	4.55186	5.53654	4.94525	4.93033	4.83011	3.55984	4.9214	4.23877
4.97372	3.21942	6.83482	7.13418	5.34504	6.86435	7.4531	4.87369	5.94982	6.10901	5.68511	6.01944	5.14464	4.2847	3.21738	2.89695	5.53212	4.96014	4.23468	3.84548	5.1062	7.14195	6.41411	6.02604	6.03217	5.61004	6.43198	5.68362	5.15418	4.04166	4.92628	5.57181	6.33276	6.2462	4.3269	3.75105	3.61318	5.97375	5.17379	5.2775	5.99051	4.678	4.19359	6.91659	6.40269	5.9399	5.22517	4.03362	5.01406	4.35966
3.45966	2.41729	5.29947	3.97882	2.62607	3.71789	4.40504	2.14257	3.58514	3.44317	3.41905	4.31113	3.32903	3.0932	2.06312	1.61514	4.36152	3.7038	3.45308	2.50508	3.93387	5.82881	3.89115	3.93371	3.92614	3.56948	4.34464	3.35912	3.95359	3.30687	3.85232	3.45283	3.74339	3.25873	3.28201	3.11993	2.76926	4.71596	3.79906	4.01088	4.64833	3.53962	3.20481	3.27138	2.80907	2.27118	2.60017	1.81046	3.54402	2.76749
9.16069	8.22142	10.1296	9.6842	8.40535	9.75786	10.0806	8.18894	9.19569	9.17821	8.86852	9.47797	8.46041	8.3155	7.14806	6.59592	9.94388	9.32921	8.95043	8.5036	9.40244	11.1266	9.75412	9.59939	9.40737	9.43143	9.59512	9.00954	9.70158	8.73707	9.33105	9.63327	9.88577	9.19765	8.99815	9.24302	8.5867	10.172	9.07798	9.62026	10.0303	9.20786	8.84376	9.30758	8.6163	8.10329	8.10164	7.31145	8.43239	7.87229
4.18402	3.41894	5.89292	5.10539	3.5494	4.99651	5.3368	3.23657	3.82974	4.20163	3.57712	4.33193	3.34914	2.95086	1.88961	1.57346	4.49719	3.98799	3.81885	3.20245	4.27354	6.26839	4.65835	4.4193	4.12063	4.14645	4.41321	4.07201	4.45854	3.43538	3.94591	4.09329	4.40143	3.8326	3.44338	3.81947	3.21905	4.89622	3.86203	4.50203	4.97657	3.94193	3.3607	4.69133	3.97399	3.59901	3.88608	2.82691	3.34914	3.00815
-0.352283	1.52376	-2.50017	0.523127	3.42584	-0.765692	0.271482	0.722742	-2.65126	-0.934742	-0.628527	-0.226972	1.28374	2.1179	2.62885	2.73322	-3.10318	-0.451084	0.720591	-0.260195	1.80451	2.80217	1.26186	1.47987	2.49203	-0.578287	0.63533	0.704942	-0.0347805	0.676795	1.49115	-1.26089	1.04695	-0.24824	-0.950468	0.809443	0.102282	-0.0517306	0.754702	0.673176	0.711273	0.347788	1.12147	-0.0943232	-2.83124	1.1618	0.800587	0.903221	0.234085	2.81845
6.40905	5.44104	7.84671	7.00152	5.46217	7.48625	7.81712	5.911	6.53261	6.61152	6.13939	6.46571	5.14475	5.13436	3.72922	3.59445	7.76085	7.22072	6.72812	5.27798	6.62749	8.83569	7.34782	7.15716	6.79419	7.02135	7.13301	6.70082	7.06143	5.96643	6.68568	7.10684	7.7036	6.97686	6.26253	6.7841	5.79341	7.47547	6.33407	7.07663	7.83488	6.84753	6.46305	6.43797	5.43265	5.19327	5.4908	4.77279	5.95329	4.95335
5.47488	4.4997	6.6846	6.43441	4.68615	6.20446	6.90471	4.47572	5.82666	5.92123	5.40677	6.05693	4.78637	4.60524	3.32127	3.05744	6.45604	5.8188	5.59921	4.32787	5.74096	7.80285	6.5258	6.23369	5.94682	6.02489	6.57176	5.82905	5.69927	4.84349	5.58913	5.64184	6.30757	5.45024	4.64254	5.16095	4.07819	6.24097	5.39113	5.78532	5.95506	5.11091	4.46505	6.03098	5.41598	4.74667	5.03146	3.71445	5.05281	4.41758
0.0522232	-1.45814	-2.39134	-0.420299	-3.56569	0.00959301	-0.638217	-2.85927	-1.53519	-0.881422	-2.89901	-0.357854	-2.87426	-1.51896	-0.535116	-1.11449	-0.347815	-0.254506	-2.30415	-0.723025	-1.44898	-3.87794	-0.638335	-0.661173	-0.608554	-1.20418	-1.21609	-3.62845	-0.248919	-0.544623	-3.7465	-1.21689	-1.16665	-1.92676	-0.49151	-2.92096	-2.58778	-0.89159	-0.868037	-3.31816	-0.311111	-0.454967	-1.3996	-0.600021	-0.521713	-0.589146	-2.26292	-3.22083	-1.7217	-0.892877
0.166979	0.570582	1.23156	-2.19553	0.189041	-0.0986071	-0.445721	-0.13209	-3.29305	0.933472	-0.10985	0.18766	-0.554867	-0.585667	-0.220386	0.427781	-2.64214	-3.2944	-0.296501	-1.70782	0.41337	0.377135	0.745539	0.0356989	-0.163044	-0.553024	-0.0236855	-0.212729	0.423184	0.255994	1.50662	-0.184462	0.471086	-0.0280704	-0.106027	0.212887	-0.0787716	0.252032	0.0882788	0.474906	-0.104113	-0.0105057	-2.38419e-05	-2.02676	-0.0336623	0.0768518	0.353517	0.547681	0.329686	-0.384585
0.123348	0.459665	0.14138	0.0272102	0.46525	0.289176	0.299631	0.405732	-0.0930901	0.423006	-0.0279293	-0.215087	-0.549042	0.00469542	-0.45785	0.417788	-0.0361786	-0.290139	0.261436	-0.497267	0.35382	0.457979	0.425907	0.313417	0.0777245	-0.288116	0.0917749	0.747652	-0.0093317	0.443954	0.291393	-0.132577	0.548627	0.355808	-0.14221	1.13885	-0.197276	0.0983901	0.718375	0.471844	0.964004	0.568708	0.36293	-0.420116	-0.366451	-0.187737	0.131305	0.619443	0.139808	0.381874
3.33295	5.23598	5.97813	3.35752	5.45758	3.07582	3.46254	5.56389	4.03728	3.77153	5.12786	3.51528	5.12127	4.57394	3.09593	5.47358	2.67039	2.51389	3.79198	2.66027	3.7031	4.95141	3.15051	3.42497	3.76437	4.18824	4.17702	5.11317	2.9819	4.21341	3.97232	4.3869	4.22924	4.9011	3.71532	3.23679	5.19347	5.11043	4.54823	4.92926	4.69088	3.72892	5.14109	3.04309	2.59042	4.01669	4.30559	5.28432	5.77971	3.77146
-0.203436	-0.87971	-1.60214	-0.79165	-0.569933	-0.572399	-0.590687	-0.854201	-0.58716	-0.813069	-0.573423	-0.628577	-0.770507	-0.324537	-0.332944	-0.227128	-0.687334	-0.389111	-0.741192	-0.670932	-0.839997	-0.970283	-0.439146	-0.524719	-0.501345	-0.566141	-0.616161	-0.614668	-0.401016	-0.404477	-0.786165	-0.623713	-0.718028	-1.16347	-0.141136	-0.915613	-0.858585	-0.327342	-0.711477	-0.87515	-0.458282	-0.477808	-0.467862	-0.470343	-0.567997	-0.420976	-0.788259	-0.641569	-0.687854	-0.496545
1.45004	-0.650865	-0.586637	1.47258	0.783576	1.65259	1.2024	-0.131114	1.1828	0.841892	0.911887	0.142195	0.0724192	0.317276	-0.0947695	-0.693887	1.2433	0.992578	-0.814431	1.20098	0.49143	0.253881	1.07011	0.986479	0.538583	0.996509	0.698378	0.867428	1.35187	0.493967	-0.669304	1.21143	0.853962	0.830847	1.18173	-1.70028	-0.450086	1.04863	0.985537	-0.112051	0.692616	1.05985	0.71956	0.490602	0.357431	0.764049	-0.00547314	0.365955	0.0384264	0.143883
-1.14515	-1.89083	-0.0363517	-0.3525	-2.42698	-0.512453	0.101039	-1.67391	-0.575951	-0.259212	-1.38803	-0.780419	-0.736732	-2.7275	-2.26872	-2.9141	-0.918793	-0.530843	-1.45092	-1.27492	-0.886211	1.01526	-0.497218	-0.810108	-0.725988	-0.946118	-0.383827	-1.3116	-0.933718	-2.03811	-1.45144	-1.05212	-1.21712	-1.16418	-1.88823	-1.67945	-1.89323	-0.618879	-1.55365	-1.08845	-0.495762	-1.04427	-2.80972	-0.650971	-1.09097	-1.93187	-1.6385	-2.99251	-0.748505	-1.46331
-0.0229912	2.9724	0.32942	-0.361979	2.65902	0.229813	0.885916	2.64443	0.813877	0.0625501	1.61432	1.25956	1.9983	1.4541	1.25496	2.51453	-0.317493	-1.33143	2.85184	0.62742	1.26309	2.99509	0.666546	1.19395	0.628968	2.51768	2.74148	3.14089	-0.321054	1.67816	2.15164	1.58915	2.02185	1.97385	-0.755238	2.01605	2.47313	1.32641	2.06384	2.95711	2.7727	2.35435	2.03499	1.4842	0.38676	1.32704	1.04884	2.35776	-0.741517	0.164171
3.69844	2.15888	4.75403	4.92202	2.99289	4.72211	5.14842	2.41023	3.66556	4.1093	3.48306	4.20455	2.75562	2.60506	0.717647	0.867141	3.31808	2.58306	2.59401	2.12839	3.51545	5.92551	4.48246	4.07147	3.92941	3.90067	4.52786	3.84633	3.96859	2.79005	3.62303	3.47132	4.01784	3.27144	2.68489	2.66232	2.20006	3.68607	2.27249	2.75307	4.65884	3.03396	2.77472	4.16452	3.81825	2.96656	3.13538	2.19346	3.01063	2.48205
1.02034	0.726413	3.21354	0.45069	2.55679	0.873759	1.34255	2.59279	1.20234	0.916584	2.63115	0.146233	0.797095	0.0665746	0.350688	2.24187	0.847473	0.330138	-1.01531	-0.169535	0.853487	-0.653986	0.80174	0.555371	0.867315	0.292403	1.43312	2.00894	0.897745	1.87195	0.116703	0.665094	1.31362	2.04732	1.0447	1.69653	-0.593439	0.845248	1.50776	1.82143	0.999315	1.66668	1.95181	0.218898	-0.118092	0.5289	1.65509	0.30096	3.0602	1.64265
2.3357	3.42394	4.01425	2.57046	3.57005	2.55482	3.04632	3.42813	2.10045	2.45732	3.17626	2.30175	2.0955	2.19503	2.16518	3.29177	2.30894	2.28677	2.06847	1.62783	2.59902	1.86027	2.4328	2.52516	2.61311	1.97165	2.4084	2.72787	2.16457	2.81304	1.99716	2.48394	2.73527	2.40299	2.68979	2.10311	2.29976	2.72049	3.29306	3.20441	2.12078	2.93203	3.15644	1.73653	2.26789	2.30609	1.59905	2.17931	3.01778	3.69499
0.89754	-1.11157	2.75539	0.424644	2.06883	0.255636	1.23362	1.82559	-0.157684	0.260676	1.82928	0.451559	0.47443	0.147043	0.836509	1.71812	1.23742	0.924398	-4.0506	-2.45912	1.5094	-3.54032	0.923001	1.01533	1.53416	-0.642447	0.927705	1.40402	0.819802	1.54597	-0.911715	1.29152	1.27394	1.98901	1.96778	1.88264	0.371145	1.38841	1.12365	1.39372	-3.19609	1.12572	1.20883	-2.31525	1.70745	1.42124	1.4555	0.266483	0.693183	1.4246
6.2575	6.41643	5.56142	6.78729	6.14008	6.3835	6.41783	6.21741	6.31435	6.0858	6.36764	6.45475	5.93799	6.22294	5.48393	5.72106	6.20553	6.04191	4.82353	5.61939	5.89925	4.95452	5.97544	5.94327	5.97086	7.63159	7.41926	7.10668	6.08021	6.19793	4.95069	7.28681	6.2485	7.05022	6.24239	4.08787	4.7912	6.63825	6.46022	5.46651	6.53023	6.39515	6.44372	6.19728	5.80607	6.42682	6.18665	6.32771	6.25314	6.23107
-1.41737	-0.0146966	2.90494	-0.880172	1.64985	-0.83562	-0.190818	1.82422	0.0270004	-0.0316281	0.80617	-0.356008	1.99569	0.0284133	0.347239	1.8734	-0.562239	-0.442382	0.191046	-0.149627	0.0986266	0.0385313	-0.716274	-0.341413	0.469658	-1.32733	-0.688823	0.947561	-0.798422	0.17025	-0.805536	-0.70416	0.382516	0.429551	-0.618013	-0.740815	-0.187194	-0.0995345	1.41324	0.400084	-1.02583	0.274607	0.338732	-0.67692	-0.403132	0.0346327	-0.307026	-0.714028	-1.03952	-0.249981
5.32074	4.57913	5.77986	5.35952	5.42709	5.30649	5.41518	5.18418	5.05475	4.86388	5.17695	4.73828	4.58965	5.12565	4.30638	4.7675	5.05141	4.77074	4.49748	4.39565	4.63569	4.91625	5.26575	5.01689	4.76159	5.45172	5.24779	5.44896	5.07136	4.94715	3.9868	5.52994	5.05642	5.29122	4.95997	3.88696	4.38151	5.46234	5.26404	4.85421	5.05437	5.0976	4.90894	4.80219	4.48059	4.92686	4.48572	4.52836	4.17869	4.43461
3.53748	3.18607	4.24788	2.99493	2.60458	3.37939	3.00837	2.72818	2.95777	2.87749	2.48814	2.6818	2.04943	2.60706	2.10615	1.87472	2.51135	2.83097	2.09646	2.49104	1.89006	3.11779	3.00654	2.82234	2.43745	3.58764	3.40982	2.93759	3.58763	3.20494	1.09668	4.09246	2.68306	3.11331	3.24313	2.85736	1.33803	3.31815	2.80713	2.18775	3.26465	2.77129	2.27877	3.02651	2.87394	3.45938	2.25898	2.49299	1.5815	2.6571
0.354539	1.74162	5.07746	0.43439	3.05585	0.76375	1.16177	2.65365	0.928766	1.30827	2.05791	0.886867	2.33459	1.48035	1.16909	3.38537	0.797419	0.763308	0.915637	0.910386	0.928502	0.795614	0.861472	0.937504	1.81005	0.0315962	1.13119	1.93326	0.677933	1.52466	0.713538	0.223506	0.767135	1.51946	0.765946	0.726849	0.660319	1.11216	2.29367	1.578	0.65395	1.23732	1.70879	0.330679	0.431192	1.24715	1.0553	0.857223	0.304646	1.18338
0.83664	3.12998	5.87831	2.90561	5.84428	3.20067	3.74226	4.22488	2.68999	3.94185	2.83879	3.62303	5.71183	4.37119	3.11153	5.03769	2.8838	2.52113	2.34689	2.61554	2.58404	3.50313	2.14928	3.41648	5.29098	1.16009	1.78784	3.75398	1.54595	1.09043	5.06566	0.830133	3.81871	2.10588	0.271057	2.15199	2.08712	3.2405	6.17027	2.68763	1.172	2.1827	1.68828	2.57873	2.09746	4.12758	3.05539	1.84423	2.08541	3.2208
4.66667	6.036	6.11421	4.39271	5.01511	4.29623	4.63966	6.00228	4.44846	4.94518	4.25631	4.36774	3.85776	4.24929	4.21601	4.83241	4.13665	4.39249	4.74002	4.3725	4.84406	4.98555	4.19634	4.84294	4.45525	5.35103	5.16584	5.2659	4.02939	4.70334	4.15596	5.15835	4.90188	5.04209	4.32782	6.23715	4.79944	4.70904	5.0821	5.35796	4.18933	5.05534	4.97407	4.30763	4.28532	4.73509	5.2322	4.65888	4.77071	4.55925
0.578544	0.542141	0.347502	-0.0911827	-1.30756	0.744075	0.830475	-0.914308	0.0152006	0.578338	-0.179182	0.820479	-0.0909462	-0.376983	-0.706218	-1.6565	0.517279	0.215317	-0.0632772	-0.0385103	0.613478	1.01574	0.0784883	0.146626	-0.377463	-0.0153961	0.185786	-0.71822	0.629736	-0.0624828	-0.49847	0.175008	0.371889	-0.359763	-0.252991	-0.704354	-0.345587	0.862416	-0.293393	0.648011	0.833097	0.0444202	-0.715104	-0.00729942	0.735821	-0.469714	-0.68363	-1.49687	-0.304064	-0.411012
-1.18372	2.39369	2.16102	-1.08042	1.42121	-1.00319	0.817876	2.48344	-0.935492	-0.415678	0.104772	-1.20724	-1.21377	-1.62133	-0.562811	-0.281077	-1.57533	-0.432524	0.970778	-2.59116	0.174973	0.819986	-1.07034	0.585065	0.233171	-1.60649	-0.172453	0.654314	-1.42832	0.556868	0.834418	-1.06629	0.978361	0.700628	-1.48398	-0.995415	-0.0801868	-0.965768	1.05984	1.52788	-0.776239	1.66353	2.06089	-1.398	-0.932887	-0.324705	-0.61195	-0.556957	1.91381	0.193088
0.84437	0.527845	-0.450857	0.639685	0.170828	0.724066	0.720613	0.880231	0.625744	0.841879	0.446917	0.504224	0.0368176	0.749986	0.428167	0.175401	0.797742	0.777837	0.127755	0.509703	0.476645	0.138007	0.472681	0.626957	0.441131	0.588858	0.33369	0.537223	0.857888	0.822289	-0.118601	0.880059	0.631698	0.175056	0.935041	1.14717	0.150379	0.611204	0.604399	0.2627	0.835823	0.80562	0.559793	0.576209	0.519139	0.76287	0.689777	0.176666	0.547648	0.835264
1.97595	1.68063	0.569922	1.94743	1.16151	2.02768	1.76914	2.05845	1.72466	1.95445	1.47973	1.58323	0.708325	1.64477	1.20329	0.941655	1.80677	1.93195	0.96274	1.57225	1.32042	1.2764	1.60157	1.73143	1.38252	1.6193	1.33928	1.46174	2.03563	1.89262	0.90758	1.76191	1.59856	1.12116	2.03538	2.30676	1.10409	1.65703	1.61925	1.21647	1.78547	1.8965	1.44708	1.55353	1.59584	1.75546	1.77713	1.42941	1.56317	1.80823
-1.41729	-0.776319	-0.716798	-1.30037	-2.04527	-3.37358	-1.55219	-1.62889	-2.51161	-0.915006	-2.41903	-1.86951	-3.24798	-2.98651	-0.912024	-1.40359	-3.43616	-2.90558	0.858568	-1.59863	-0.9792	1.33932	-1.6302	-0.571524	-0.482653	-3.65223	-3.50415	-1.85243	-2.06629	-0.701311	-0.421369	-1.40222	-0.91537	-1.80414	-1.20014	-0.179325	0.556167	-1.91317	-1.07856	0.358941	-1.18946	-0.734794	-0.760924	-1.53006	-1.32066	-1.5882	0.270589	-0.239075	-0.80024	-3.13684
1.1671	2.16333	1.5016	1.01626	1.87706	0.882509	1.31634	2.18169	0.988218	0.957202	1.4671	1.30259	0.939202	1.10742	1.07909	1.94067	0.760561	0.975538	1.61649	0.927589	1.16848	1.30943	0.953639	1.4224	1.08392	1.39927	1.52962	1.54631	1.12761	1.59416	1.18	1.16401	1.42338	1.74462	1.21826	1.72223	2.0726	1.155	1.71081	2.03691	1.23458	1.64205	1.58314	0.939208	1.11751	1.57464	1.6243	1.76927	1.62658	1.50108
-0.0241661	0.892265	2.40745	-0.193471	0.837546	-0.0917664	-0.171661	1.18694	-0.456809	-0.230312	0.18658	-0.676906	-0.838588	-1.20728	-0.816796	1.16061	-0.140542	-0.691884	-1.49522	-0.715194	0.0655103	-1.18618	-0.0382814	-0.133684	0.130983	-0.699893	0.0635471	0.434946	-0.245135	0.157687	-0.576172	-0.64833	-0.014915	0.196591	-0.499105	-0.905927	-1.32773	-0.0831122	0.365644	0.174268	0.0260973	0.489503	0.73754	-0.129531	-0.0327001	0.460837	-0.37674	0.406354	-0.783875	-0.38082
3.70214	4.43225	3.56951	3.64528	3.89849	3.95466	3.70877	4.09399	3.15977	3.57756	3.70596	3.37272	2.17378	3.02074	3.08044	3.74928	3.11769	3.26106	3.73605	3.46784	3.40115	3.76967	3.38803	3.59453	3.60369	3.53167	3.93678	3.69595	3.68361	3.51497	2.78833	3.42574	3.43817	4.20293	3.91312	3.50595	4.4251	3.64656	4.11549	4.33444	3.76519	3.68302	3.68731	3.03525	3.3228	3.8199	3.82118	3.89721	3.7887	3.24551
3.31553	3.88942	3.9912	2.99372	3.43865	3.25894	3.35934	3.94717	2.48843	3.00624	2.92263	2.9832	2.13602	2.72362	2.64671	3.33922	2.67787	2.66727	3.11717	2.57149	2.88841	3.4684	2.89529	3.11598	2.76219	3.33955	3.55013	3.66747	2.99914	3.26123	2.12605	3.11554	3.09247	4.04608	2.96889	2.9096	3.70528	3.32426	3.65025	4.0459	3.3025	3.35142	3.31496	2.74309	2.78463	3.46312	3.40654	3.11092	3.59043	2.78825
-2.38498	-2.86143	-2.63603	-1.93458	-2.69679	-1.86561	-2.12796	-3.12763	-2.89021	-1.99596	-2.74829	-1.98681	-2.90961	-2.17274	-1.86399	-2.19486	-2.19054	-1.69454	-2.27132	-1.06971	-2.09655	-2.47677	-2.24014	-2.10887	-1.97959	-2.01456	-2.49989	-1.77031	-2.30808	-3.43162	-2.99046	-2.48063	-2.36705	-2.69963	-2.37964	-1.69612	-2.20514	-1.95523	-2.43141	-2.37084	-1.97515	-2.30971	-2.10497	-1.75283	-2.14858	-1.87018	-2.5818	-2.03568	-2.20855	-2.32264
-0.0918922	-1.80855	0.392736	0.749567	-0.762144	1.33834	1.54923	-0.991443	0.619961	0.932111	0.243664	0.553588	0.365869	-0.968567	-1.26364	-2.28041	1.18556	0.413938	0.0796452	-0.898049	-0.55719	1.52237	0.754643	0.303767	-0.298431	0.309724	0.997313	0.31565	0.853198	-0.333832	-0.305784	-0.0313148	0.14143	-0.183417	0.155111	-0.729298	-0.404752	0.615469	-1.0491	-0.376233	0.768317	-0.259712	-1.21105	1.00864	0.955179	-0.191094	-0.273411	-1.49768	-0.196944	-0.572901
2.91077	2.97572	2.65461	3.01562	2.5948	2.78207	2.72543	2.8745	3.01048	2.57302	2.91418	2.84289	2.44183	2.81945	2.2362	2.10039	2.48007	2.27927	2.70895	2.30661	2.74301	2.61897	2.54482	2.65231	2.45993	3.85235	3.27845	3.577	2.44761	2.63786	2.39776	3.90812	2.49657	2.90465	2.65291	1.91284	2.6395	3.20393	2.68094	2.83427	2.57306	2.85206	2.78947	2.86083	2.3945	3.44386	2.67837	3.48654	2.16483	2.45164
2.19052	1.45481	0.43184	2.3686	1.74635	2.58	2.37349	1.70928	2.35276	2.40381	2.21726	2.3996	4.16527	2.14709	2.22443	1.10206	3.4128	3.17865	2.05359	3.23189	2.72615	1.8575	2.87527	2.68814	2.67234	1.85201	1.58929	1.53965	2.64194	1.61274	1.48218	2.67788	1.90258	0.948271	2.32361	0.518402	1.9445	2.26573	1.28252	0.598183	1.69812	1.33542	1.26275	3.53799	1.89667	2.08907	2.65794	1.8334	1.94681	1.47422
1.03018	0.752388	0.0329833	0.833685	1.30947	1.01323	1.29729	1.28011	0.599343	1.11676	1.024	1.3947	0.47794	2.18384	1.38947	1.44605	0.876871	0.602911	1.71324	0.60492	1.50363	1.61369	1.03659	1.52044	1.72521	1.34252	1.5585	1.65707	0.972487	1.30563	2.29294	1.1481	1.90613	1.95013	0.807077	1.31271	1.87778	1.08922	1.46734	1.34522	1.35756	1.18216	1.39458	0.623544	0.791727	1.10827	1.4012	1.40458	1.41655	1.78681
-0.986463	-3.54642	-1.15922	-0.519025	-1.07022	-0.747084	-0.784235	-1.25685	-0.298306	-3.23626	-0.968932	-0.124267	-0.821607	-3.49748	-2.3623	-0.0312262	-0.318174	-0.158455	-2.11463	-2.53732	-0.792868	-0.253796	-0.70312	-0.57651	-1.06481	0.811977	-0.129662	-0.501146	-0.0820007	-0.999698	-3.60115	0.38128	-1.12262	-1.31793	-1.40816	-2.1366	-2.55527	-0.689644	-1.29299	-1.77292	-1.22389	-1.45157	-0.902944	-0.462985	-2.33726	-0.93042	-2.5206	-2.55054	-1.58129	-0.752009
-0.671381	-0.510526	0.691785	-0.867592	-0.757766	-0.548759	-0.475934	-0.850748	-1.11992	-0.387728	-1.16966	-0.944751	-1.21594	-0.853883	-0.852343	-0.0279379	-0.789057	-0.962655	-0.105125	-1.59667	-0.283973	-0.414316	-0.568916	-0.715953	-0.251333	-0.963903	-0.764697	-0.567016	-0.692995	-0.723889	0.234835	-0.641047	0.0742269	-0.44589	-0.67348	0.184632	-0.741527	-0.76518	-0.48772	-0.54719	-0.390476	-0.547821	-0.674367	-1.21452	-0.614563	-0.613702	-0.101104	-0.477552	-0.924851	-0.810251
-2.66695	-3.25578	-1.82189	-2.45283	-0.599115	-2.59293	-2.59311	-2.02174	-3.32286	-2.71134	0.194459	-3.26976	-2.13904	-2.27131	-2.812	-1.55865	-1.94096	-2.73386	-2.63802	-1.95359	-2.41821	-3.18371	-2.31598	-2.81579	-2.12703	-2.85283	-2.36106	-2.02418	-2.45152	-1.93411	-2.89685	-2.87503	-2.71026	-2.33158	-2.47614	-3.18739	-3.1664	-1.54056	-2.56374	-2.84226	-2.97818	-2.35569	-1.7901	-3.12696	-2.36776	-2.6186	-1.43663	-2.89477	-2.57209	-2.53836
-1.18422	-0.966284	-1.02181	-0.936529	-1.24834	-1.85715	-0.739446	-1.33399	-2.4324	-2.12996	-0.509076	-1.30557	-2.62461	-3.31202	-2.67196	-1.29035	-1.82844	-3.19732	-0.911984	-2.32835	-0.706681	-0.965587	-1.05049	-1.34651	-0.515865	-1.89042	-1.0696	-1.28263	-0.777434	-1.09875	-0.653442	-1.91555	-3.21305	-1.26509	-2.79351	-1.18901	-1.00282	-0.890008	-1.25737	-1.45583	-1.4175	-1.37142	-1.33385	-2.23347	-1.55352	-1.29655	-1.15825	-1.28174	-0.792474	-3.41472
-0.191486	-2.1816	-0.571355	-0.578459	-2.67798	-0.704722	-1.06963	-2.4589	-2.11098	-0.820725	-1.12791	1.43878	1.44541	0.145403	1.05923	-2.45988	-0.293514	-0.719678	1.6829	0.448465	-0.380274	-2.00539	-0.185054	-0.187251	0.227173	1.56625	1.43912	-0.38663	0.0216646	-0.537322	-2.71205	0.402884	-0.39376	-1.98694	-0.553583	-2.21408	-1.14655	-0.760608	-0.829601	-0.903231	0.261971	-0.293811	-0.712773	0.061471	0.353448	0.00203037	-0.874438	-3.47812	-1.31401	-0.0195899
-0.0297699	-0.792	0.443162	0.180478	-0.301301	-0.253081	0.571649	-0.999596	-0.769278	1.07641	0.0144424	-0.623112	-0.677228	-1.38259	-0.852571	-0.406045	-0.953446	-1.09744	-0.289635	-1.03492	0.81396	1.63064	-0.169956	-0.118412	0.136905	-0.991102	0.0530415	-0.114555	-0.172217	-1.05163	-0.598924	-0.912089	-0.414245	1.95076	-0.415257	-0.283264	1.14237	-0.740743	0.801406	1.29716	-0.504238	-1.09609	-1.71312	-1.46448	-0.417096	-0.0759821	1.75206	0.613284	-0.262714	0.299601
1.34639	3.28084	5.60675	3.34696	5.63179	3.15312	3.6773	4.24505	3.02854	4.21628	3.10063	3.72062	6.20013	4.43522	3.83098	4.87198	3.14793	2.92366	2.54481	2.75804	2.63971	3.48412	2.38625	3.18486	4.88058	1.43253	1.80964	3.73548	2.12409	1.38498	4.82042	1.29087	3.95626	2.57762	0.725875	2.55042	2.01309	3.2802	6.04939	2.60421	1.69094	2.13662	2.07324	3.1105	1.85344	4.24457	3.29728	2.23911	2.29152	3.46149
0.334183	1.08429	1.59812	0.556606	0.788983	0.300908	0.507192	0.832413	0.326969	-0.0368514	0.559425	0.0937138	-0.574446	0.513413	-0.0346022	0.613118	0.206822	0.0625196	0.86283	-0.564358	0.446757	0.867186	0.21102	0.555648	0.632026	0.650805	0.76062	0.759835	0.297847	0.394462	0.690388	0.544229	0.772465	1.08408	0.383271	0.979793	0.952288	0.465127	0.918232	1.0045	0.224865	0.514565	0.723683	-0.062849	-0.145447	0.546454	0.727296	0.747823	0.472973	0.320734
5.50002	7.07898	7.65899	5.67544	6.47981	5.77608	5.84498	6.55818	5.56941	5.63707	6.05892	5.28305	5.61392	5.60725	5.00889	6.77133	5.23353	5.159	6.12562	4.64293	5.5739	6.23069	5.58926	5.75301	5.92161	5.97713	5.89386	6.30427	5.45843	5.84595	6.05343	5.8833	5.61585	7.31975	5.60642	6.28145	6.5332	5.85447	6.24918	6.08365	5.71791	5.77881	5.88599	5.26257	5.16223	6.05714	5.89432	6.63448	7.44773	6.15112
2.77948	4.14429	3.86085	3.22626	3.54505	3.0377	3.3428	3.62188	3.25814	3.58024	3.4334	3.12332	3.60759	3.37609	2.56409	3.7376	2.78486	2.91611	3.22622	2.02597	2.90386	2.9793	2.73635	3.24295	3.24916	3.61431	3.66564	3.79209	2.61751	2.88866	2.99538	3.6613	3.13075	4.36184	2.98311	3.8332	3.92008	3.28012	3.67565	3.0097	2.76705	3.08616	3.04562	2.71537	2.54959	3.24235	3.30664	3.35523	4.86817	3.07554
0.0053606	0.076386	0.0802836	-0.234291	-0.0903745	-0.312199	0.093545	-0.0323434	-2.91235	-0.251341	1.63018	0.0596209	-2.71428	1.09659	-2.99772	-2.38839	-2.29611	-0.181485	-0.0328503	-2.3196	0.301619	-0.275937	-2.35947	0.140675	-0.0875187	-3.40151	0.0599089	-0.435549	-2.62436	-0.00204849	0.176404	-3.58288	-1.98929	-0.0150375	0.300653	0.200493	1.40063	0.699675	-0.173676	-0.213171	0.166188	-0.0395775	0.0457516	-3.1714	-2.86856	0.161238	-0.422358	0.0690613	-0.3024	0.018621
3.54879	3.66115	3.05036	3.17032	3.38992	3.16669	3.47575	4.20923	2.55077	3.06258	3.41208	2.96334	2.3255	2.9226	2.90271	3.35358	3.03739	3.34172	3.6793	2.92404	3.42643	3.71315	3.31083	3.65587	3.28674	3.34203	3.41937	3.40322	3.09117	3.45459	2.87988	2.99478	3.21439	3.58478	3.25608	3.89956	3.74674	3.43004	3.70563	3.66519	3.40273	3.59163	3.68811	2.70742	2.52807	3.31384	3.64868	3.34375	4.52286	3.61898
2.85238	4.80398	3.38011	3.05252	4.71196	2.82499	3.15214	4.25598	3.04967	3.37976	4.63961	2.84647	3.94104	3.79494	3.34109	5.05306	2.82921	2.63911	4.11496	2.20508	3.56625	3.72375	2.86372	3.14964	3.61741	2.62298	3.42161	3.91436	2.97342	3.93278	4.16506	2.82419	3.59964	3.76653	3.02104	3.366	4.04798	3.30676	3.83792	3.91711	3.28337	3.21748	3.99972	2.74488	2.61938	3.52041	3.66798	4.7617	3.94549	3.83918
1.29914	1.62274	1.60318	1.21555	1.13361	1.25728	1.08906	1.1484	1.22643	0.924757	0.98656	0.771556	0.741449	0.907978	0.799479	0.8686	1.08101	1.04251	1.07795	0.87103	1.34579	0.987341	0.771972	0.964439	1.07754	1.44383	1.17266	1.35005	0.937556	0.841962	0.524482	1.43399	0.904054	0.977335	1.06093	0.186415	1.17459	1.29617	0.565969	1.74638	0.953318	0.951802	0.81762	0.90656	0.947596	1.22498	1.26853	1.84811	0.763595	0.896074
0.523833	0.621779	0.746948	0.64321	1.55629	0.854699	1.14397	1.66571	0.484288	1.08704	0.752164	0.640471	0.607543	0.405109	0.729416	1.41896	0.302459	0.136364	1.22694	0.129227	1.52213	1.60544	1.01056	1.13499	1.079	0.385098	0.785385	0.880622	0.657064	0.905865	0.765262	0.684329	1.59318	1.61968	0.605009	1.3495	1.27653	0.531816	0.886986	1.30899	1.05481	1.54668	1.18415	0.640352	1.00316	0.868907	1.5384	1.08552	1.14697	1.13046
4.01683	3.3667	2.30276	4.08307	3.07142	4.00331	4.17377	3.25567	3.65236	3.64945	2.91419	3.61016	3.49567	3.9682	2.77256	3.08958	3.77136	3.59191	3.23745	3.49019	3.11459	3.30054	3.80699	3.53489	3.2112	3.72083	3.58793	3.60787	3.74658	3.60357	2.0029	3.8281	3.88255	2.92459	3.88102	3.702	2.40449	4.11391	3.98316	1.99826	3.94593	3.56648	3.21482	3.58976	3.46808	3.45999	2.55198	1.92085	3.04013	3.26237
-1.83185	-2.87429	-2.86801	-2.28602	-2.70176	-2.21217	-1.93779	-1.15186	-1.42862	-1.9414	-3.54485	-1.58584	-0.789562	-1.29768	-2.25088	-2.23899	-2.38515	-1.54246	-2.88715	-2.05856	-2.68608	-2.95004	-2.24678	-2.78646	-3.3314	-1.39634	-2.27604	-0.740997	-1.52239	-2.25389	-2.11626	-1.25124	-2.5078	-2.4114	-2.39349	-2.74203	-3.11863	-1.85148	-2.81325	-2.62896	-1.51678	-3.32723	-2.81541	-1.58343	-1.67812	-2.54107	-2.63963	-1.64897	-2.98147	-1.86136
2.06409	2.41989	3.75845	2.26285	2.98685	2.39277	2.57638	2.91447	1.81955	2.47358	2.69866	1.86172	1.71682	2.38963	1.63264	3.42653	1.40784	1.24012	2.39681	0.938296	2.46135	2.41315	2.04423	2.29181	2.66454	1.74693	1.93022	2.65337	2.00964	2.52076	3.1915	1.92151	2.95534	3.95083	2.11319	2.77392	2.42946	2.27774	2.75606	2.64721	2.19342	2.53314	2.53434	1.56155	1.23051	2.06638	2.61314	2.69071	2.50596	2.50021
3.19913	4.59296	4.09761	3.20712	4.21647	3.37044	3.52841	4.3643	2.78486	2.95608	3.23534	3.31551	2.92546	3.27816	2.97782	4.72665	2.94729	3.04734	3.89533	2.57272	3.48622	3.78897	3.17914	3.59207	3.47659	3.54972	3.83586	4.2109	3.18724	3.19074	3.16922	3.31981	3.68097	3.88004	3.22164	3.58819	4.37322	3.265	4.36094	5.23458	3.52708	3.85777	3.75453	2.97888	3.08877	3.80742	3.55062	4.19373	3.88153	3.29631
7.52124	4.56241	3.29711	7.49815	5.23647	7.07454	7.28043	4.66518	6.33967	6.35718	4.61283	7.13862	5.16983	6.56248	6.345	4.06286	6.95178	7.52295	4.08956	6.40613	6.41537	4.70235	6.57596	6.7319	6.81266	6.06005	5.98736	5.12076	6.83815	6.50965	4.15871	5.98921	6.15066	5.16519	7.49877	3.75563	3.8653	6.88936	6.52329	4.99179	6.57319	6.83408	6.37412	6.78747	6.68215	6.85739	6.04051	5.08851	5.18635	6.72092
-0.388661	-1.44699	-2.42556	-0.340582	-0.939382	-0.109933	-0.245812	-1.49049	-0.64419	-0.400112	-0.584366	-0.173149	-0.936425	-0.251212	-0.563056	-1.50533	-0.410085	-0.412523	-0.988465	-0.729899	-0.605116	-1.07156	-0.71732	-0.567366	-0.206121	-0.405156	-0.406961	-0.757258	-0.744349	-0.54143	-0.102554	-0.272749	-0.324513	-0.579414	-0.607743	-1.48049	-1.19649	-0.608126	-0.957538	-1.46884	0.368526	-0.514004	-0.491776	-0.197601	-0.162899	-0.513586	-0.852809	-0.866383	-0.637934	-0.318847
-0.710666	-0.457118	0.435036	-0.32831	-0.110532	-0.390781	-0.39888	-0.111516	-1.19896	-0.46348	-0.43746	-0.380958	0.47216	-0.299778	-0.530568	-0.0215645	-0.516707	-0.574438	-0.0977459	-2.21475	-0.382571	-0.569144	-0.271618	-0.508874	-0.496688	-0.624296	-0.51848	0.000397682	-0.840794	-0.235168	0.138052	-0.677915	-0.443046	-0.30731	-1.12319	-0.7592	-0.812993	-0.695356	-0.115571	-0.684822	-0.808519	-0.549206	-0.424968	-0.680488	-0.700418	-0.44193	-0.353365	-0.53197	-0.829511	-0.220485
6.38146	7.2872	6.50901	6.11245	7.11881	5.8496	5.89987	7.27667	6.4847	5.94479	6.48695	6.5312	6.67844	6.33518	5.14607	7.22233	5.76462	5.21851	5.26729	4.96386	5.83375	5.55336	6.24612	5.4944	5.43265	7.02093	6.65675	7.17078	5.68876	6.00109	6.1562	6.71789	6.06848	6.69362	5.89266	4.87371	6.39427	7.24325	5.85865	6.74372	6.6757	6.2972	6.19299	6.29667	5.64465	5.99028	6.04134	7.25854	7.10055	5.97989
-0.795617	0.0819116	-3.59982	-0.564471	1.6491	-3.43106	-0.49724	-1.48677	-2.71504	-0.503638	-1.02459	-1.00294	0.519708	0.951342	2.25318	2.34122	-2.85801	-2.53109	0.0354939	-3.14452	0.00085783	1.16993	0.277291	0.185652	0.384098	-1.19928	-0.121066	-0.505808	-0.549499	-0.0249929	0.212503	-1.27203	0.173956	-1.30849	-2.1664	-1.32966	-1.02313	-0.552002	-0.955159	-1.1777	-0.319021	-0.591741	-0.267118	-3.13052	-3.13183	-0.211404	-0.404294	-1.44516	0.000216484	1.65081
7.27634	3.7644	2.75177	7.1479	5.41488	7.76925	7.5511	5.68626	6.69943	6.92684	5.66217	5.94975	5.01634	4.55323	4.478	0.789969	6.92173	6.68537	2.92892	7.36106	7.26206	5.78499	7.08121	7.18609	7.19803	5.9676	5.76226	6.18375	6.25883	5.13854	3.09158	6.79838	6.09934	5.50838	5.76753	0.645851	3.26049	6.92603	5.14756	3.86543	6.92742	5.35353	4.96288	6.88322	6.12832	5.4473	5.81673	4.98605	4.88598	4.93717
1.31094	1.48431	2.12849	1.33971	2.34222	1.81115	1.90821	2.35911	1.12789	2.39494	1.69027	1.36931	1.19026	1.34384	1.5639	2.27216	1.14597	0.943154	1.72065	0.717799	2.32939	2.15726	2.28046	1.94304	2.04492	1.26042	1.6247	1.73628	1.06153	1.41151	2.49512	1.56288	2.4561	2.40056	1.2595	2.1494	1.70689	1.65669	1.98716	2.43239	1.99079	2.06512	1.76416	1.13101	1.43552	1.80303	2.27712	2.00553	2.25228	1.91647
-1.96485	-1.83897	-0.912614	-1.70241	-1.26476	-1.53486	-1.84627	-1.86075	-2.41933	-2.07953	-2.53492	-3.69084	-2.41393	-3.23383	-2.38663	-1.15949	-1.8652	-2.36639	-1.82381	-1.80518	-1.81636	-1.54366	-1.91277	-1.7896	-1.97859	-2.51679	-2.21232	-1.92208	-1.99539	-2.18863	-1.42286	-2.24938	-1.72031	-1.10473	-2.55295	-1.2871	-1.71586	-2.07794	-1.79324	-2.14797	-1.65357	-1.70568	-2.09089	-2.32384	-2.22723	-2.09528	-1.94467	-1.59827	-2.79623	-2.03927
-2.45521	-2.56498	-0.493298	-3.06154	0.027844	-2.543	-1.40819	-1.00176	-2.5472	-3.08237	0.230386	-2.30299	-3.09988	-3.35457	-2.97596	-3.23021	-2.85227	-2.30419	-2.35266	-0.961949	-3.09198	-3.00945	-2.80771	-2.35816	-1.31987	-3.65723	-0.379416	-0.266217	-2.11879	-0.953175	-2.86341	-1.49215	-2.64119	-1.03328	-1.11858	-2.88317	-2.68636	-0.824131	-1.1605	-1.57201	-1.13223	-0.865929	0.331189	-3.2643	-2.29979	-2.90951	-1.36501	-1.44746	-3.88556	-2.12935
1.93776	2.84128	2.22487	1.86767	2.23235	1.92277	2.12756	2.62446	1.46172	1.7019	1.79217	1.63699	1.28521	1.67086	1.41316	2.12476	1.64267	1.68376	1.99726	1.55838	1.78927	2.05882	1.71464	2.10759	1.83522	1.87072	2.01907	2.13378	1.8634	2.0262	1.45079	1.88173	1.92339	2.57668	1.96411	2.33488	2.22028	1.92832	2.20898	2.44553	1.83428	1.90303	1.911	1.47942	1.69617	1.97501	2.13637	2.1828	2.45267	1.994
2.74537	4.24889	5.25306	2.85707	3.40771	3.32961	3.23542	3.69346	1.77262	2.36124	2.51185	2.60692	2.21273	1.7129	2.27219	4.91394	2.64688	2.2657	3.72335	1.77637	3.2215	3.4524	2.59839	3.55264	3.84108	3.11368	3.3317	3.25396	2.41287	2.92427	3.34072	2.40421	3.35452	3.54789	2.57948	4.31257	3.16626	2.38093	3.71699	4.1773	3.29742	3.06573	2.7982	1.78925	2.87885	3.56084	3.55158	3.78308	2.11388	1.78799
1.50963	3.88949	0.168384	1.17829	2.63765	1.3219	1.73392	2.77233	2.04593	1.3822	2.61127	2.4641	2.42236	2.32291	2.03278	3.22276	1.57095	1.23166	3.66828	1.04425	2.72317	3.41395	1.50741	2.03142	1.717	2.86775	2.75365	3.84724	1.64025	2.49786	2.58648	2.45701	2.75668	2.37422	1.70627	2.47395	3.44875	1.82032	3.50055	2.85366	2.12181	2.65327	2.46766	2.24187	1.69667	2.87583	2.20732	2.67684	0.4505	1.63619
1.10234	1.02239	2.56827	1.07426	1.83513	0.832837	1.09432	2.18516	0.512328	0.802279	1.53113	0.860462	1.16279	0.766716	1.04634	2.23505	0.325362	0.100624	0.834158	0.63024	0.91407	0.157384	0.854449	1.06913	1.08043	0.514675	0.804451	1.18859	0.893572	1.30661	0.482714	0.345862	1.08933	1.05001	0.971904	-0.13507	0.0898199	1.2224	1.45066	1.05151	1.01293	1.31572	1.38764	0.753342	1.19878	0.881434	1.08994	0.00569725	0.812778	1.22724
-0.777104	-1.37875	-1.2612	-0.560339	-1.21453	-0.196291	-1.24314	-1.58178	-0.400607	-0.582698	-1.42993	-0.964441	-0.579655	-0.758778	-1.60801	-2.3148	-0.782565	-0.885222	-2.93245	-1.3787	-0.894852	-1.57248	-0.984726	-1.23855	-1.57927	-0.806787	-1.24471	-0.959418	-0.312243	-0.552845	-1.98393	-0.787249	-1.10202	-0.35922	-0.197789	-1.52472	-1.59748	-0.684298	-0.611413	-1.31379	0.070363	-1.07529	-1.14662	-0.738524	-1.17478	-0.626392	-0.212084	-0.255647	-0.780235	-0.350761
5.07416	5.07573	4.94182	4.88103	5.38543	5.31125	5.3849	5.57718	5.16514	4.78394	5.64562	5.01802	4.98866	5.31565	4.27829	4.36062	4.85877	4.68774	5.08417	4.52681	4.56157	5.40889	4.91514	4.81987	4.52167	5.83066	5.61332	6.25757	4.7601	5.03333	3.81611	6.01871	4.91999	5.33281	4.73953	3.47371	5.05614	5.45912	5.30016	5.53723	4.69913	5.0565	5.49487	4.57752	4.2257	5.01604	4.79687	5.53015	3.53807	4.39855
-0.566706	-3.10911	-2.90133	-0.0819883	-0.960376	-0.753904	0.0071516	-1.41667	-1.25309	-0.29426	-1.49179	-0.665163	-0.809728	-1.17124	-0.593211	-1.49006	-0.592992	-0.907553	-2.83752	-1.41604	-0.551678	-0.728248	-0.144964	0.0748215	-0.259013	-1.41586	-0.704117	-0.663547	-0.459975	-0.0717859	-0.33505	-1.18688	-0.141421	-0.584901	-0.143198	-0.0684319	-1.68037	-0.848442	0.334086	-1.86606	-0.504069	-0.180637	-1.0429	-1.01026	-0.278983	-0.751505	-1.17595	-2.09126	-1.21294	-0.579287
0.106326	-1.81667	1.00984	0.742248	-0.681747	1.31611	1.17501	-0.814337	0.430699	0.71938	-0.149802	0.409541	-0.294785	-0.983613	-1.45216	-3.19047	0.730461	0.408359	-0.15354	-0.809093	-0.214971	1.75214	0.758085	0.434616	0.528489	-0.0209389	0.403096	0.13052	0.691537	-0.229565	0.0399632	-0.200722	0.360792	-0.26599	-0.156566	-0.470332	-0.693834	0.70485	-0.722759	-0.161019	0.757136	-0.0640974	-0.401724	0.642359	0.212697	-0.621055	-0.389846	-1.65619	-0.315932	-0.881271
-0.107688	2.15708	3.24511	-0.122846	1.76494	-0.380383	0.450092	2.17321	-0.100838	0.319944	0.902058	0.466128	0.4214	-0.124833	0.642401	2.32206	-0.600417	-0.633563	1.41128	-0.715423	0.827501	1.24389	0.0772667	0.527933	0.583592	1.08671	1.17387	1.20131	-0.337368	0.761686	-0.0740647	0.39187	0.79671	1.39159	-0.138513	1.62453	1.52007	0.0307031	1.08925	1.49643	0.204279	0.714484	0.86362	-0.0944424	0.216345	0.652627	1.11758	0.79896	1.52788	0.817954
0.619551	1.04615	2.176	0.153477	1.22479	0.38408	0.689255	1.22455	0.23537	0.874665	0.55385	0.280652	0.303428	0.0435605	0.871137	1.94076	0.155416	0.182689	1.30395	0.0067234	1.41507	0.647735	0.646148	0.528254	0.681623	0.136805	0.445833	1.07613	0.386846	0.759611	1.26034	0.0562468	0.777753	1.39174	0.750884	1.91054	0.40265	0.908367	1.25086	1.1555	0.680746	1.67097	1.03938	0.5393	0.817129	0.785336	1.13056	0.454063	0.906594	1.13382
2.186	1.86163	2.05933	2.53516	1.66541	2.4061	2.37009	2.13445	2.70285	2.17799	2.164	2.55062	2.09237	2.54795	1.9224	1.58687	2.20542	2.16075	2.03958	1.91048	2.06339	2.48327	2.08905	2.21308	1.95734	3.34759	3.12112	2.81035	2.22943	2.11659	1.92105	3.33523	2.20975	2.88612	2.34968	2.02391	2.76505	2.57134	2.37679	1.88197	2.06702	2.25406	2.13042	2.42906	2.34305	2.4033	2.24424	2.50811	1.98007	2.0041
5.29354	6.30803	6.32724	5.20689	5.50623	5.38288	5.7013	6.13056	4.82436	5.39036	5.15546	5.35796	4.27927	4.98764	4.98735	5.10347	4.96448	4.9006	5.66278	4.56325	5.14491	5.90114	4.98695	5.61021	5.39161	5.66995	5.88878	5.77145	5.28821	5.39519	5.04429	5.45173	5.52687	6.32666	5.44121	5.38328	6.21266	5.21596	5.68182	5.81045	5.4833	5.41039	5.37952	4.70775	4.92593	5.42627	5.74608	5.88761	5.51058	5.14374
0.310438	1.10497	0.960844	-0.139361	0.642136	-0.212076	-0.181431	1.18099	-0.0793543	0.0507741	0.0585432	0.214515	-0.34452	0.0897136	-0.0316639	0.889781	-0.266885	0.251999	0.358037	0.204572	0.127596	0.692989	-0.0988617	0.143816	-0.203044	-0.129046	0.215299	0.524457	0.08885	0.576438	-0.110921	-0.347338	0.327371	0.495202	0.0414586	0.399795	1.04107	-0.0217957	0.565936	0.995945	-0.0352659	0.353481	0.55132	-0.216538	-0.0484204	0.345497	0.364357	0.660297	0.754193	0.548622
-1.62817	0.931752	1.04592	-1.22407	-0.378507	-1.08501	0.0364733	0.726587	-1.10448	-0.727721	-0.940968	-1.42407	-1.02104	-1.05241	-1.14884	-0.311977	-1.54549	-1.1513	-0.975274	-1.16316	-0.775564	-0.223007	-1.24837	-1.45241	-2.02996	-1.29205	-0.748075	-0.109094	-1.59351	-0.94508	-1.68924	-0.532076	-0.476732	0.743883	-1.37229	-0.363491	0.559151	-1.28149	-0.191853	0.339182	-2.02924	-0.729304	-1.04369	-1.63998	-1.71426	-0.684278	-0.419021	0.515854	0.408901	-0.892268
4.9281	3.80561	1.21942	5.94064	3.36595	5.53876	5.56588	1.99053	4.93215	5.19339	4.76499	4.91867	3.7484	2.98549	2.03909	0.268691	5.92793	4.39501	0.560921	3.79618	4.49011	2.47177	4.11777	3.44735	3.07134	4.95239	5.06812	2.95304	4.27851	2.7801	1.8806	5.0636	3.27816	2.87222	4.31473	2.72093	0.501575	5.73417	4.07881	2.05223	5.97552	3.70955	2.92457	5.74231	5.08563	4.43798	3.85117	1.6222	3.09778	2.38052
-0.409602	-0.876954	-1.42331	-0.886423	-0.270391	-1.61461	-1.11302	-0.656469	-0.630479	-0.953688	-0.360415	-0.970335	-1.11518	1.11247	0.402309	-0.0872984	-0.273929	-1.26056	0.477501	-0.76143	0.329724	-0.44373	-0.538076	-0.220287	0.424528	-0.595509	-0.788691	-0.457465	-0.604472	-0.0766039	1.45671	-3.75009	0.680442	-0.469515	-0.648087	-0.510888	-0.0994673	-1.43645	-0.514792	-0.411924	-0.59627	-0.774651	-0.116714	-1.09362	-0.799999	-0.762022	-0.806685	-0.81084	-0.233164	0.534404
-0.847029	0.746761	-1.44271	-1.03152	2.21847	-1.32514	-1.01266	-0.801343	-2.89614	-1.6333	-1.10564	-0.81973	0.828894	1.41248	2.66069	2.79966	-2.07189	-1.9379	-0.0134811	-2.09895	0.198783	1.10729	-0.0344801	0.791992	0.827909	-1.57739	-0.337296	-0.0840712	-0.741674	-0.102818	0.155289	-1.83895	0.0508895	-1.37704	-2.71955	-2.84452	-0.607963	-0.661249	-0.574823	-1.30032	-0.481961	-0.711292	-0.0907888	-1.22001	-0.943161	0.338028	0.0975609	-0.970207	-0.597306	2.36368
-1.85283	-2.09354	-0.915369	-3.41537	1.23325	-1.90869	-1.07011	0.670952	1.54623	0.49144	1.59875	-2.99564	-0.465226	-0.409558	-0.914842	-3.40477	-0.388515	-3.18908	0.90831	-2.12147	1.48458	3.05607	1.78149	1.385	1.70427	0.551642	-0.314408	0.211685	0.179501	1.44348	2.37768	-2.14869	0.401881	0.28826	-2.5191	0.425585	1.39983	1.60996	1.22551	1.98864	0.517021	1.79673	1.52016	-3.89029	-3.6596	0.949016	1.3668	0.00952148	0.538807	1.34856
-1.80485	-0.503156	0.884902	-2.86361	0.72554	-2.13895	-1.46639	-0.060226	-2.84634	-1.71655	-0.195441	-1.40339	-0.0312653	-0.164938	0.406964	1.14536	-1.57926	-2.29741	-0.634081	-1.98948	-0.609024	-0.213364	-1.08968	-0.846152	-0.415526	-2.49266	-0.791455	-0.0774488	-3.09159	-0.378757	-0.715005	-1.86744	-0.45491	-0.303763	-2.73366	-2.12626	-1.61828	-1.17183	-0.919298	-0.762748	-1.17124	-1.0265	-0.354285	-2.5721	-2.29962	-1.17353	-0.938973	-1.07539	-1.19862	0.344289
4.67845	5.48733	4.21945	5.00604	4.25974	4.3844	4.37992	3.75744	5.25334	4.42355	5.32866	4.69198	4.58734	5.18912	3.22542	3.76079	4.45549	3.69418	4.45045	3.60329	4.23807	5.30375	3.99368	4.11185	3.72305	5.58601	4.7508	4.35603	3.77309	3.59482	4.29541	5.86615	3.66928	3.67555	4.16105	4.57775	4.37306	5.35995	4.42743	3.28681	4.68891	4.38399	4.31963	4.87438	3.60536	4.99692	3.92803	3.55405	3.10962	3.83877
0.183446	0.456645	3.39332	-0.218841	2.4827	0.21935	0.402656	1.99877	0.181673	0.694976	2.26942	-0.0816689	1.5871	0.22109	0.355761	1.94619	-0.152015	0.0144935	0.0911417	0.332934	0.44154	-0.191519	0.283496	0.338833	0.978435	-0.423979	1.36493	1.83014	0.164296	1.23231	-0.226927	-0.00589657	0.478028	1.56164	0.498128	-0.306723	-0.346363	0.626132	1.5908	1.30909	0.220135	0.816688	2.01965	-0.209186	-0.0721831	0.576462	0.759189	0.670047	-0.367459	0.720115
0.7288	-0.622512	-0.196943	0.603653	-0.0586009	0.645961	0.753639	0.276832	0.71595	0.737334	-0.839612	0.465151	0.0744085	-0.415902	-0.0243311	0.512597	0.756069	0.529963	-2.47417	0.644743	0.411932	-2.70741	0.985559	0.674926	0.763141	0.0631065	0.335978	0.575145	0.64972	0.403261	-0.799713	-0.135839	0.880535	-0.200242	0.769585	-3.0328	-0.553911	0.891868	1.05484	-0.551693	0.928964	1.63252	0.934631	0.407868	0.846755	0.500966	0.0924902	0.211017	-0.0907745	0.553907
-2.85537	-0.858768	1.36156	-2.44862	-0.0912137	-1.20323	-0.952164	0.284574	-3.94617	-2.67926	-0.61418	-1.5787	-0.632471	-2.92585	-2.68781	0.456231	-2.80903	-2.88822	-0.406733	-2.35685	-3.01293	-1.3163	-3.65734	-0.665772	-0.480821	-2.61477	-1.07754	-0.0182667	-0.626194	-0.444028	-2.68784	-0.824654	-0.133305	-0.612907	-1.87269	-1.06671	-3.17405	-0.599737	-0.226779	-1.02571	-3.06094	-0.781915	-0.543167	-2.47374	-2.94186	-1.37323	-1.00077	-1.61324	-2.58426	-0.176406
-1.46151	0.270654	1.40407	-1.42834	-0.434456	-0.881701	-0.0428591	1.15874	-1.05907	-0.368946	-0.151837	-0.739001	0.300704	-0.694198	-3.08221	1.37972	-0.940083	-0.86935	-0.467717	-2.26207	0.407832	-0.230932	-0.913972	-0.398526	0.426731	-1.7261	-0.583184	0.282845	-1.36361	-0.653772	-0.745488	-0.865376	0.891036	1.40206	-0.995097	-1.05404	-0.874626	-0.95863	1.29474	0.493199	-0.780599	0.129754	0.777221	-1.23185	-1.3547	-0.869929	-0.105493	-0.366711	-1.23714	-0.195882
1.85041	-0.30876	-0.440522	1.8444	0.325387	1.58381	1.50327	0.0551267	1.00229	1.11665	0.198562	1.43558	-0.0985823	0.959814	0.833681	-0.174442	1.40242	1.60509	0.0764799	1.39558	1.05111	0.509284	1.22182	1.23878	1.16091	1.24809	1.00921	0.711718	1.66598	1.37783	-0.207946	1.05533	0.925581	0.369695	1.68575	-0.516158	0.490264	1.44917	1.12557	0.369065	1.32316	1.2508	0.980765	1.2951	1.40477	1.36118	0.793782	0.085391	0.445027	0.664536
0.557522	1.22239	1.33676	0.857885	1.33772	0.800244	1.01981	1.22235	0.423118	0.584621	0.789362	0.558817	0.356438	0.754572	0.377811	1.46994	0.32588	0.533881	0.999786	0.107668	0.703522	1.26411	0.699176	1.03008	0.885234	0.840554	0.896682	1.1825	0.512719	0.814025	0.463915	0.458009	0.98629	1.75545	0.4711	1.01747	0.848125	0.724355	1.21092	1.4128	0.713235	0.890548	0.760854	0.545264	0.212578	0.920256	0.783386	0.959194	0.665989	-0.0272355
7.33629	6.64847	6.52644	6.99186	6.61091	7.21939	7.33045	7.04786	6.6722	6.84695	6.44955	7.0118	6.21744	6.46463	6.12547	6.67392	6.69694	6.6657	6.16096	7.06783	7.04278	6.58004	6.99542	6.95235	6.69173	7.1192	7.22317	7.00391	6.76701	7.05192	5.37271	7.13292	6.85961	6.81609	7.23047	5.48676	6.862	7.37608	7.01843	6.86304	7.18445	7.2707	7.36421	6.97261	6.98069	7.25253	6.89791	6.57483	5.66626	6.17855
4.17828	4.71011	5.47771	3.9782	4.50442	4.03437	4.07553	4.70621	3.6033	3.85979	3.91656	3.95655	2.98619	3.74797	3.63425	4.31504	3.82795	3.82044	4.19759	3.47853	3.83794	4.35583	3.87759	4.11577	3.89735	4.25065	4.27066	4.46972	4.03709	4.33091	3.2368	3.98196	4.04603	4.76155	3.85297	3.86598	4.48709	4.09391	4.42854	4.72343	3.94654	4.30978	4.26231	3.63387	3.85112	4.33168	4.06971	3.88572	4.24204	3.80357
1.01867	0.733963	-0.0268683	1.05641	0.867537	1.00281	1.00219	0.990058	0.752899	1.13763	0.791248	1.01643	0.8652	0.56057	0.878133	0.696453	0.921709	1.15293	0.999206	1.28257	1.13211	0.967463	1.08884	0.878738	1.03108	0.516266	0.848264	0.513998	1.12678	0.84949	0.881339	0.553192	0.841991	0.195775	1.0191	0.820501	0.853405	0.778174	0.92958	0.708535	0.990156	0.914763	0.833566	0.988338	0.956224	0.815517	0.933203	0.635975	0.948508	0.957548
1.92929	-1.84345	-3.0914	1.70435	0.598726	1.73853	1.48094	-0.0863776	0.924573	1.28575	0.637748	1.13615	0.0477238	1.0941	0.334053	-1.04789	1.2395	1.63334	-0.822717	0.492738	0.726176	0.0527687	1.1663	1.16086	1.35898	1.18059	0.959551	0.778605	1.34611	1.2155	0.258391	1.34939	1.15997	0.576519	1.52144	-2.22663	-3.38683	1.64352	1.50879	-0.280385	1.28335	1.01568	0.774022	1.04737	1.08731	1.54293	0.761355	0.146737	-0.0785675	1.00262
-1.00918	-2.47195	-3.11216	-2.57485	-0.963569	-2.35967	-1.66732	-1.82369	-2.80638	-1.55795	-0.858564	-2.23672	-1.96332	0.904557	-0.226796	-0.801497	-0.227019	-0.839812	0.600144	-2.02418	0.288105	-0.953305	-1.16359	-0.80022	-0.118805	-2.42217	-2.15388	-1.3133	-2.60939	-0.968627	1.29037	-2.49913	0.274452	-2.47396	-2.16089	-2.55603	-2.17537	-2.72773	-1.35202	-1.16745	-0.986988	-1.55096	-0.658135	-2.27196	-2.00837	-2.65402	-2.97209	-2.87487	-1.50752	0.441165
0.553905	1.08263	1.19782	0.738495	1.08735	0.204173	0.062664	1.2407	-0.202326	0.265051	0.646041	-0.121404	0.372358	0.229119	0.186105	1.58131	0.444386	0.694451	0.72035	0.0145235	-0.0653062	0.436411	0.263098	0.513592	0.0886345	0.289742	0.242772	0.803586	0.578776	0.849819	-0.0640521	0.464717	0.378804	0.844481	0.478752	0.908319	0.687399	0.311518	0.636836	0.641329	0.209868	0.419081	0.355922	-0.304215	-0.0677238	0.37048	0.554481	0.497664	0.942642	0.719517
-2.48499	-3.24801	-3.31863	-1.81565	-2.90152	-2.20427	-2.12041	-0.741158	-1.52322	-1.87259	-2.01377	-2.49792	-2.15845	-1.35712	-2.29657	-2.61519	-1.02364	-1.1613	-2.53856	-3.07532	-1.93164	-0.332498	-2.08671	-2.01703	-2.66413	-1.5651	-2.05121	-1.38006	-1.37834	-2.2005	-1.92918	-1.94862	-2.52256	-2.87387	-2.12168	-2.8749	-2.81277	-1.47737	-2.49777	-2.21576	-1.23933	-1.55572	-1.78815	-1.46564	-2.70769	-1.69538	-3.12646	-2.42649	-2.16808	-2.12383
1.25684	0.886131	0.293841	1.77599	1.40265	1.47367	1.42467	0.913996	1.29376	1.37104	1.26632	1.14672	0.744227	1.34881	0.415242	0.394117	1.17352	1.00605	0.631325	0.328672	0.818974	1.10924	1.11221	1.10336	1.09237	1.47167	1.38874	1.44129	1.23065	1.16533	1.16967	1.47586	1.22797	1.14165	1.51371	0.893044	0.99854	1.55887	1.30267	0.873659	1.43908	1.2534	1.36227	1.14705	0.931754	1.29574	0.770937	1.08932	0.83497	1.27955
4.50646	3.29395	3.08689	4.49711	3.96455	4.34956	4.39769	3.42703	3.4099	3.72464	3.46555	3.97203	2.86218	3.87386	3.44878	2.94237	3.7729	4.02745	3.55808	3.21375	4.28683	3.78193	4.05336	4.31472	4.46561	3.75657	3.82393	3.82718	3.92781	3.81993	3.45281	3.73409	3.92584	4.12162	3.94877	3.07796	3.20595	4.13591	4.23092	3.81086	4.21094	4.06083	4.02149	3.64587	3.33279	4.08043	3.62239	3.47338	3.91403	3.81501
4.94034	2.85597	2.57153	5.00416	3.05216	4.84623	4.94726	2.7075	4.77592	4.77319	3.88779	4.44234	2.8547	4.78716	4.31648	2.15363	4.51262	5.02056	4.0312	3.80021	4.0785	5.09389	4.71126	4.7251	4.77823	5.14842	4.95727	4.49174	5.11537	5.09615	3.00308	5.47268	4.45611	4.73327	4.52198	2.36361	3.59387	4.44629	4.49614	4.13433	4.77093	4.86622	4.79111	4.13679	4.43996	4.61127	3.73718	4.53775	5.08113	4.33978
-0.129128	-0.45177	2.03055	0.00841045	0.657586	0.471996	0.642675	0.863806	-0.343775	0.38365	0.234556	-0.0659752	0.358125	-0.870985	-0.260994	3.15595	-0.902787	-1.27064	-0.045229	-0.81534	-0.267841	-0.443667	-0.300334	-0.251374	0.352703	-0.544022	0.223989	0.28367	-0.991278	-0.271321	-1.71604	-0.275772	-0.0558305	1.1849	0.517605	-0.498669	-1.26974	0.443624	0.863706	0.1373	0.517115	0.507202	0.220784	0.0674505	0.384743	0.517174	0.0909948	-0.4144	-0.488243	-0.571016
1.53907	-0.295341	-0.528103	1.20798	1.16714	1.64231	1.6371	1.12963	1.87174	1.65964	1.40531	1.51177	1.64194	0.963564	1.82868	-2.12048	1.86989	1.4394	-3.38712	2.38185	1.36382	0.145329	1.50626	1.48855	1.19404	1.41252	1.52468	1.79966	1.06211	1.48124	-1.84901	1.78178	1.02494	0.974965	1.89603	0.591953	-2.38557	1.62186	1.33543	0.0457873	1.7875	1.42575	0.609765	1.71024	1.86798	1.72297	1.2705	0.543161	0.783109	1.11967
0.821074	2.95055	1.00858	0.440926	1.50139	0.307627	0.79335	1.25604	-2.24943	-2.62937	0.259701	0.882174	0.594375	0.806185	1.49522	1.93625	0.968656	-2.55157	2.47195	0.121421	1.14893	2.6882	0.518119	0.661099	0.698935	0.691186	0.903589	1.71894	0.769496	0.532384	1.80218	0.688893	1.08661	0.72771	0.713657	2.10191	2.72881	0.624818	0.79693	2.73512	0.801208	0.801673	0.393659	1.1909	0.302196	-1.96404	1.01317	1.83239	-0.744007	1.59769
0.453597	-2.98606	-3.14095	0.357465	-0.497268	3.83531	3.81109	1.79948	0.448823	0.0283227	-2.00231	0.414479	-0.330877	0.476927	-1.08721	-2.37819	0.39038	0.555276	-2.32851	2.30247	2.19716	2.5656	0.740693	0.140859	0.0601177	3.08058	2.70973	2.64034	0.821831	0.150494	-2.44083	0.619941	-0.264013	-0.158967	0.449469	0.694306	-0.51758	0.277779	-0.221021	-2.71545	1.01791	0.474883	0.176012	2.30503	1.9601	2.10191	-2.4144	-3.49469	0.671906	1.1104
2.62297	3.41423	2.55608	2.09804	2.80517	2.55065	2.65388	3.25742	1.74497	2.48345	2.39718	2.37581	1.38023	2.232	2.33137	3.35855	1.89819	1.89117	2.77366	2.18838	2.75884	2.91065	2.27704	2.78567	2.60898	2.63409	2.80314	2.79176	2.54053	2.80562	2.22033	2.47327	2.85202	2.78621	2.41637	2.14731	2.92888	2.39664	2.79988	2.87832	2.689	2.70984	2.46933	1.85255	2.25129	2.76354	2.86196	2.91989	2.8146	2.50942
-2.59434	0.831082	-1.21119	-1.5445	-0.0495877	-1.7139	-0.966412	0.378109	-2.07441	-1.05228	-0.577868	-1.60877	-1.12744	0.206127	-1.55316	1.2578	-1.38383	-3.33674	-0.461535	-2.09101	-0.287894	0.212552	-0.363144	-1.09372	-0.495454	-1.91377	-1.17235	-0.160724	-2.06984	-1.05776	-0.319236	-1.35868	-0.00032568	-0.528275	-2.91604	-0.876902	-0.146398	-1.46457	-0.484862	-0.369338	-1.81197	-0.751995	-0.438178	-1.63771	-2.95229	-1.67673	-0.710132	-1.13972	-1.89211	-0.91667
2.0305	0.704219	-3.25569	1.61078	0.858145	1.61591	1.75457	0.465067	1.12144	1.31022	0.587253	1.0578	0.396249	0.802827	0.965047	0.237634	1.51751	1.58941	0.51796	1.37593	1.57247	1.18246	1.58729	1.83308	1.53645	0.996606	1.14468	1.09059	1.53958	1.63495	0.773892	1.31011	1.71642	0.947076	1.36961	0.0919809	0.601705	1.76693	1.6137	1.18264	1.39048	1.89554	1.41982	1.2745	1.33783	1.47628	1.11982	0.709105	0.386925	1.23042
2.01941	2.76484	1.39903	1.92267	2.27502	2.10677	1.92177	2.94521	1.6803	2.39666	2.15263	1.92293	1.38533	1.88553	1.51703	1.97924	1.71078	1.75749	1.94698	1.41826	1.65626	2.06109	1.79876	1.72184	1.56813	2.1949	2.27464	2.3509	1.64894	2.15173	1.7937	2.16015	1.99899	2.2892	1.69163	3.49474	1.99789	1.72184	2.3045	2.12523	1.97358	2.31763	2.24212	1.73748	1.20585	1.89302	2.07476	2.25969	2.69407	2.55501
4.72447	5.09004	3.93157	4.4837	4.78855	4.36635	4.61656	5.23468	3.72385	4.11107	4.41156	4.64945	3.61517	4.73615	4.4746	4.95611	4.17461	4.23751	5.12045	3.97196	4.66278	5.07879	4.23388	4.73471	4.60971	4.56157	4.81537	4.78126	4.36234	4.87097	4.16314	4.29818	4.66399	5.00813	4.38007	4.67583	5.09032	4.37517	4.96163	5.13657	4.70884	4.8816	4.89598	3.94629	3.84139	4.60454	4.75415	4.94831	5.5497	4.68901
-0.550941	-0.602436	-0.445127	-0.384817	0.418576	0.0512037	-0.00638676	0.0447192	-2.82302	-0.0849442	-0.247466	-0.383066	-0.598358	-0.838696	-0.597761	0.586451	-0.89365	-2.95433	-1.0747	-2.64399	-0.219501	-1.04743	0.497261	0.111109	-0.225557	-2.59364	-0.852348	-0.261188	-0.813162	-0.355928	0.36886	-1.22684	-0.113487	0.367116	-0.703236	-0.500377	-1.42887	-0.462854	-0.0490551	-0.189463	0.125287	-0.139147	-0.313117	-0.547925	-0.742541	-0.443474	-0.972323	-1.16006	-1.34077	-1.07933
2.41706	2.67036	2.95549	2.38505	3.03459	2.35626	2.42707	3.27438	2.10328	2.20204	2.60335	2.56746	2.00317	2.33085	2.17052	3.11539	1.87824	2.25661	2.50769	2.02364	2.29682	1.90705	1.8386	2.43802	2.09188	2.8871	2.83927	2.56375	2.35138	2.86588	1.85141	2.84276	2.53545	2.32237	2.40401	2.59892	2.57304	2.53347	2.95099	2.88085	2.49386	3.12386	2.9919	2.09509	2.04766	2.94863	2.50106	2.50927	3.3087	3.04708
-2.49812	-2.31528	0.52506	-1.71669	-2.72623	-2.25648	-3.11744	0.392757	-2.95163	0.822804	-2.20157	-2.52712	-3.06082	-1.61263	-1.93096	0.209032	-2.53908	-3.95256	-2.7692	-2.66623	-0.722112	-2.02724	-1.09095	-0.858686	-2.43467	-2.60307	-1.46603	-1.9991	-1.8013	0.0209322	-2.23372	-2.44534	-2.287	1.41061	0.21134	1.44404	-2.18051	-1.05975	-2.72393	-1.4542	-1.0181	-0.596414	-1.64012	1.26744	-2.70452	-0.151081	-0.115427	-0.348114	0.808243	0.675823
2.96222	3.19428	2.35867	2.7542	3.43925	2.80406	2.88828	3.06447	2.0423	2.45416	3.29285	2.52957	1.67758	2.6226	2.53909	2.59973	2.29901	2.5456	2.77546	2.20331	2.65737	2.95121	2.57461	2.86293	2.77101	2.50042	2.80409	2.9259	2.44842	2.97945	2.11835	2.48928	2.66369	3.49558	2.82962	2.72145	3.0534	2.75509	3.349	3.21549	2.93247	3.04793	3.52606	2.40852	2.51511	2.96143	2.81807	3.01094	3.08394	3.00221
-0.0472336	1.12994	1.50551	-0.312542	0.932222	-0.00126553	0.168746	1.44213	0.0741234	0.273213	0.322223	-0.334233	-1.07982	-0.651552	-0.270135	0.706429	-0.172946	0.26573	0.269613	0.0619364	-0.141438	0.286261	0.350739	0.17144	0.257219	-0.551167	0.04564	0.309425	0.369813	0.689182	0.614224	0.127621	0.632525	0.164583	0.519179	-0.480265	-0.408146	-0.148255	0.833622	0.728358	0.123094	1.35967	1.51609	-0.0480947	0.325658	0.0849466	-0.163545	-0.261908	0.386137	0.449349
0.248579	2.20791	2.51232	0.266214	2.08864	0.289889	1.35945	2.7168	0.00898933	0.822736	0.947521	0.249914	-0.280002	0.585554	0.258234	1.24284	0.304726	0.252305	1.19924	0.00935841	0.852813	1.01713	0.558519	0.927086	0.99109	-0.0273876	0.67225	1.05286	0.352498	1.29513	1.18471	0.28003	1.51135	1.26909	0.357276	0.216844	0.292993	0.220622	1.72546	1.5386	0.464463	2.35524	2.70767	0.251527	0.413696	0.665239	-0.269835	0.200858	1.25864	1.25768
-1.03823	-0.787773	1.70018	-3.97973	0.406269	-0.750226	-0.940692	0.152542	-2.55336	-0.643217	0.406894	-0.492531	0.650491	-0.208508	-0.176969	1.72254	-2.6424	-1.93323	-2.67944	-0.337047	-0.306592	-1.08403	-1.02467	-0.840872	-0.247175	-3.24721	-1.04072	-0.22875	-1.18106	-0.488788	-2.29231	-3.10696	-0.66367	-0.55644	-0.676477	-2.42203	-0.595438	-0.709675	-0.0104017	-0.435056	-0.443627	-0.669394	-0.457142	-0.555258	-0.784433	-0.481228	-0.363248	-0.932353	-1.21338	-0.744251
0.332749	2.95557	0.591767	1.19488	3.01222	1.17821	2.6873	3.70215	1.5191	2.25106	1.74619	0.740094	1.80489	1.80512	-2.3859	0.653264	0.586223	0.52229	1.83664	-0.475269	1.8484	3.61858	1.96156	3.03136	2.04421	1.73349	1.8835	2.50828	0.321399	0.895553	0.279755	2.0467	1.39818	2.57091	1.13138	2.33148	3.94462	2.5562	0.83559	3.83701	0.676849	0.751165	0.250681	1.24107	2.00433	2.49959	1.84419	3.47731	0.244328	-0.00945139
2.27925	1.42707	2.16422	2.63205	2.91891	2.37538	2.5502	2.44532	2.19607	2.30788	2.45719	2.06212	2.7291	2.44817	1.79511	3.85504	2.08047	2.08421	2.0868	1.34319	1.86419	2.23227	2.13311	2.25044	2.63831	2.30213	2.21813	2.50822	2.11517	2.26057	2.14313	2.25161	2.16482	3.52791	2.60449	2.12599	2.09252	2.57935	2.91287	2.08559	2.13495	2.19911	2.13383	1.98634	1.84169	2.53367	2.28801	2.05742	2.06528	2.32525
1.92877	1.28375	1.78565	2.32933	1.41552	2.25715	2.29507	0.69342	1.71545	2.02385	1.63863	1.11206	1.10125	1.41411	0.406603	1.38663	1.95829	1.92664	0.629331	0.89802	1.01748	0.967038	1.92949	1.3735	1.65028	1.22264	1.40794	1.1736	2.36976	2.23738	0.283453	1.58625	1.639	1.54389	2.88946	0.305017	1.1379	2.42892	2.03664	1.1183	1.0195	1.62187	1.46264	1.03574	1.56439	1.80288	1.00335	1.21993	0.704731	1.28727
5.3909	3.19493	3.37473	5.37227	4.29183	3.96613	4.93429	3.96906	3.92516	3.95285	3.49254	4.52985	3.79684	5.08416	3.91169	3.40757	4.61061	5.06428	3.93875	4.10922	4.71035	3.51914	3.78854	4.32292	4.57556	3.90174	3.99908	3.4883	4.88061	4.0021	3.38391	3.59029	4.60288	3.22967	4.53786	3.07184	2.83484	4.56023	4.77126	4.30716	4.84332	4.64711	4.52118	4.5603	4.2805	4.23548	3.1739	2.63856	3.21246	4.20411
-0.186197	-0.589964	-1.30745	-3.36534	-0.381321	-1.99087	-2.26623	-0.497508	-2.89964	-3.11999	-0.354615	-0.848333	-0.647429	-0.527171	-0.612705	-1.338	-2.74678	-0.301973	-0.784918	-2.3874	-3.11807	-0.425294	-0.299727	-0.0927877	-0.199641	-3.44087	-0.692595	-0.0763693	-0.0138359	0.079854	-1.07575	-0.43527	-0.218013	-0.273304	0.069634	-1.26685	-0.581063	-0.623085	-0.141373	-0.493802	-0.477303	-0.129726	0.209538	-2.21302	-0.61787	-0.180012	-0.255978	-0.430305	-0.498728	-0.680552
6.11983	5.4727	5.84606	6.32866	5.03415	6.37249	6.1439	5.19946	5.88456	5.85751	5.40803	5.86637	5.07974	5.62723	4.97895	4.60341	6.00537	6.02871	4.25428	5.1909	5.13738	4.65258	5.70019	5.54948	5.5436	6.38383	6.09184	5.72117	5.91907	5.68012	4.42971	6.42894	5.29709	5.60247	6.1324	4.03311	4.55034	6.04832	5.80008	4.41323	5.95004	5.7846	5.65769	5.84585	5.59362	6.05672	5.1213	5.19874	5.21126	5.33312
-2.88518	-0.63906	-0.689539	-2.30982	0.896642	-2.85385	-2.6323	-0.528999	-3.17129	-3.57072	0.192496	0.148455	1.16827	-0.016005	0.991076	0.85606	-3.2296	-2.06906	-0.603546	-2.3807	-1.50343	-0.156417	-2.88325	-2.00401	0.447902	-3.663	-2.83978	-0.438675	-3.97196	-0.412726	-3.07228	-3.23356	-2.4525	-1.31352	-2.82715	-2.66113	-0.947577	-2.14405	0.000453949	-0.923485	-2.47032	-0.516205	-0.419685	-1.94603	-2.44632	0.0703974	-2.20948	-2.54919	-0.624903	1.0838
-2.46602	1.41388	1.45817	-1.97689	3.101	-3.64094	1.86979	0.54237	-1.80719	0.777582	1.54936	1.23713	2.81669	1.58194	1.8774	0.871016	-2.5759	1.11672	-2.67429	0.348141	-3.72783	1.00287	-2.76731	0.0741682	0.471642	-2.2232	-2.73146	1.52099	-1.99776	-2.40741	2.64799	-3.67941	0.0381761	1.24366	-2.97218	-2.22875	-2.47402	-2.82512	1.56074	-2.7688	1.87427	-0.0304794	2.13176	0.532926	0.0168824	0.302873	-2.50169	-2.10752	0.045929	0.600767
1.6263	1.63776	2.9765	1.56123	1.95718	1.81132	2.0601	2.121	1.32856	2.30844	1.76033	1.49885	1.06885	1.32014	1.60475	3.0006	1.36263	1.55428	2.6532	0.935004	1.61517	2.10066	2.01903	2.08201	2.26959	0.889898	1.04523	1.09322	1.80883	1.97431	2.0113	1.72123	2.25669	3.39908	1.7919	3.09639	2.28313	0.975412	1.26195	1.83334	2.22523	2.19567	1.74963	0.996698	1.40955	1.50375	2.21157	2.33739	1.61547	1.84898
2.36425	0.809536	0.558788	3.36379	2.71679	3.662	3.51933	1.99694	3.27611	3.16052	2.95562	2.79244	2.91505	3.01653	1.95205	1.2232	3.06222	2.83175	0.9126	2.49658	2.11791	1.76435	3.00846	2.43931	2.11067	3.74813	3.38017	3.59553	2.96863	2.73015	1.34716	4.11796	2.34195	2.72556	2.38993	0.260951	1.26073	3.65492	2.56301	1.62042	2.7578	3.01651	2.61411	2.95806	2.65666	3.10408	2.09979	2.85578	2.11314	2.80232
1.80884	2.61768	3.43819	1.82709	2.65067	0.0526133	0.709518	1.23901	0.629096	1.17597	2.07897	-0.282368	-0.62519	-0.826988	-0.629121	0.558866	1.80933	1.27785	1.57013	0.950574	2.20179	2.09851	0.698326	0.895976	0.9866	1.69571	2.05167	2.78131	0.949965	1.87434	1.2926	2.08203	2.47626	2.9394	0.220187	0.292445	-0.251732	2.53731	3.34245	3.30294	2.30717	3.15222	3.2777	0.741585	1.53894	1.74059	2.04585	2.32063	1.85339	1.42319
-0.434568	-0.0721164	0.0937839	-0.686039	-0.224175	-0.416085	-0.414926	-0.29348	-0.808124	-0.583973	-0.388769	-0.258419	-0.0366554	-0.607622	-0.0600977	-0.30024	-0.563679	-0.615304	-0.655035	-0.704411	-0.530059	-0.231693	-0.658272	-0.490284	-0.477816	-0.306266	-0.288658	-0.313764	-0.594399	-0.440701	-0.867359	-0.316969	-0.514036	-0.245138	-0.421461	-0.468395	-0.371837	-0.694342	-0.291998	-0.273228	-0.464048	-0.337475	-0.301307	-0.792203	-0.399758	-0.275425	-0.255096	-0.478976	-0.561661	-0.221382
7.11543	5.60206	5.01325	7.36562	7.06606	6.96504	7.09489	6.08365	6.4553	6.95214	7.15288	7.29677	6.76181	7.2786	6.80596	6.33736	6.42918	6.68756	6.4091	6.68875	6.79397	6.4882	6.71646	6.97265	6.52719	6.68414	6.83698	6.67718	6.82233	6.96508	6.1659	6.93723	6.60246	6.83916	7.48434	5.61854	6.27018	7.33273	7.48299	6.88376	7.36434	7.15391	7.22216	7.19916	7.48186	7.73296	6.60949	6.39145	6.39705	6.70365
-0.0492926	-3.51254	-3.36004	-0.469994	-0.939042	-0.380435	-0.659639	-2.25111	-0.822186	-0.98676	-0.680688	-0.424373	-1.50559	-0.830225	-1.17535	-2.54008	-0.478544	0.193208	-1.98827	-0.404985	-1.4268	-2.69118	-0.801252	-1.12323	-0.83079	-0.795834	-0.787487	-1.47132	-0.563428	-0.930048	-2.29487	-0.493382	-1.03171	-1.6695	-0.528668	-2.14135	-1.6488	-0.888067	-1.26277	-1.64336	-0.606998	-0.900909	-0.939616	-0.396537	-0.0692029	-0.561323	-1.3431	-2.02592	-1.89158	-1.25665
0.0699072	-0.296321	-0.0861554	0.252395	-0.779788	-0.0400877	0.548809	-0.0314832	-0.0298271	0.252964	-0.658712	0.160302	-0.644519	-0.2658	0.0469246	-1.18902	0.00759983	0.19499	0.698909	0.363261	-0.404397	0.498918	-0.0227957	0.0384064	0.532474	0.391686	0.279588	-0.50904	0.0864487	0.164294	-0.0822835	0.396246	-0.2101	0.112604	0.265343	0.387207	-0.756276	-0.103911	-0.535843	-0.597307	0.371441	-0.109058	0.0488205	-0.0216322	0.298971	-0.0447397	0.640972	-0.158857	0.392927	0.414774
-0.249936	-3.1483	-2.41772	-1.25006	-2.77287	-1.06286	-0.777906	-2.72823	-1.18019	-0.774974	-2.48722	-1.38057	-2.96482	-1.63498	-1.57648	-2.90866	-1.03474	-0.713613	-1.94243	-0.992446	-1.02547	-1.64151	-1.14852	-1.08207	-1.4646	-1.61639	-1.87322	-2.13494	-0.314103	-0.712477	-2.75394	-1.38409	-1.07725	-2.39459	-0.552591	-2.69959	-1.24464	-1.40727	-1.43726	-1.92454	-1.63551	-1.13171	-1.39583	-1.32484	-0.551558	-0.630895	-1.74039	-2.44301	-2.27537	-1.43821
1.97742	3.12857	2.42141	2.33941	2.47614	2.17524	2.40669	2.16925	1.90783	2.44922	2.49095	1.85303	1.85025	2.23614	1.47066	1.78105	1.70771	1.6342	2.07715	1.49367	2.19517	2.30228	3.43415	1.97981	2.57453	2.49224	2.44528	2.47647	1.63488	1.80086	4.38499	2.65603	2.60824	3.03017	2.23533	2.47055	2.50589	2.38455	2.47847	2.45312	2.92735	2.11343	2.22422	1.8367	1.63524	2.07665	2.14815	2.95187	1.70658	1.94029
2.01682	2.52981	2.40649	1.67794	2.13985	1.98622	1.89491	2.49332	1.42289	1.68271	2.04652	1.63561	1.34098	1.75271	1.2995	2.11012	1.41058	1.74212	2.03091	1.58582	1.83472	1.71572	1.43383	1.85216	1.90254	2.20331	2.28699	2.19021	1.71704	2.02773	1.13299	2.13941	1.95006	2.05285	1.70873	2.29184	1.8995	1.7756	2.323	2.01292	1.91507	1.99953	1.88759	1.40544	1.24407	2.02684	2.12362	2.09949	2.81026	2.1959
-1.90966	-0.706501	-1.25559	-1.57197	-0.0802321	-1.57885	-1.21894	-0.0963378	-1.64466	-0.112421	-1.19265	-1.76738	-0.836843	-1.54012	-1.25926	-0.377234	-1.44842	-2.0838	-0.256481	-1.39166	-0.820783	-0.795858	-0.476671	-1.13341	-1.28587	-1.85498	-1.3436	-1.23969	-1.89532	-1.21714	0.870647	-1.57424	-0.728767	-0.75979	-1.89014	-0.785048	-0.61517	-1.62933	-0.829839	-0.495686	-1.6913	-1.10047	-1.28389	-1.72941	-1.96386	-1.23603	-0.929396	-0.865241	-0.898273	-1.46496
0.913568	-0.143046	3.93148	2.04706	0.547898	1.27169	1.32421	0.528673	0.765918	0.504397	0.739134	0.644944	0.303715	0.46643	-0.676425	-1.1142	1.76719	1.60155	1.0131	0.164789	0.702044	1.65072	1.10376	0.759929	0.294378	1.14647	1.01494	0.835718	1.04545	0.0983171	0.51966	1.24574	1.01341	0.587797	0.455106	0.0542288	0.305043	1.49181	0.151745	0.55894	1.36989	0.340122	-0.106158	1.83256	0.598427	0.537982	0.416016	-0.529439	0.125947	-0.0145307
-1.9486	-3.00891	-2.31012	-0.917998	-2.21339	-1.55904	-1.2065	-2.62459	-1.13816	-0.849946	-0.917133	-0.849286	-1.37897	-0.821867	-1.66885	-2.30469	-0.740682	-1.98607	-2.25871	-2.03908	-0.791152	-1.58772	-2.15643	-1.42352	-1.28282	-1.53666	-1.40046	-2.82618	-1.13218	-1.1623	-2.57155	-1.43094	-0.991553	-1.7215	-1.43142	-2.41886	-2.69421	0.414347	-1.48464	-2.62797	-0.617067	-1.32627	-1.72896	-0.41571	-0.486721	-1.00471	-1.32148	-2.55468	-2.14145	-1.93478
0.508057	-0.513661	-0.294421	-2.23508	-0.572856	-0.931971	-0.635404	-0.934516	-3.5506	-2.34331	-0.343472	-0.839924	-2.92321	0.255481	-3.31237	-2.83905	-2.7233	-2.80133	-0.207471	-2.78753	-2.85383	-0.48877	-0.602511	0.0950994	-0.0241833	-0.685443	-0.46096	-0.569946	-0.689663	-0.453056	0.804741	-2.54661	0.0547681	-0.550801	-0.957741	-1.32018	-0.194443	-1.09322	-0.890216	-0.617975	-0.39194	-1.07566	-0.504545	-2.61271	-2.35027	-0.424977	-0.493895	-0.137396	-3.09319	0.00224066
3.91813	3.48996	3.57173	4.1189	3.84772	3.79515	4.13278	3.52361	3.52368	3.14618	3.56528	3.72322	3.49425	4.11011	3.17351	2.97074	3.51984	3.41985	3.15585	2.71349	3.54998	3.52348	3.60304	3.84447	3.98534	4.29309	4.03518	4.27667	3.2319	3.31949	3.33178	4.41201	3.90757	4.4227	3.4977	2.818	3.10451	3.9179	3.93236	3.22034	3.82203	3.81335	3.73733	3.03407	2.60782	3.24527	3.14462	3.30522	3.03884	3.54593
4.56977	4.82681	9.77412	5.83571	3.83481	4.42907	5.0707	3.44376	5.45229	5.399	5.95157	5.06888	4.34504	5.6732	2.55876	4.52749	5.1699	4.93157	4.08458	4.9469	4.83596	5.53335	6.4438	4.49584	4.45696	5.19834	5.09285	3.85391	4.4346	4.06722	4.00293	4.58516	4.26269	5.74545	3.569	4.38366	3.12415	6.88383	3.75188	4.20513	5.74052	3.97223	3.81226	5.14931	3.93667	5.07394	4.37041	3.73736	4.04258	4.17627
5.28938	6.40642	5.50779	5.27969	6.1258	5.36951	5.4057	6.4156	4.73859	5.11846	5.27354	5.28631	4.50411	5.12412	5.04398	6.14699	5.03781	5.08945	5.85304	4.54331	5.3839	5.70744	5.18548	5.4199	5.11071	5.36004	5.60307	6.03864	5.37465	5.59673	5.01251	5.17765	5.56901	5.8463	5.42224	5.26744	6.11046	5.23749	6.18809	6.87428	5.46552	5.84615	5.66298	5.05747	5.21486	5.8312	5.85805	5.98519	6.23265	5.17882
4.27139	4.74189	2.10151	4.87282	4.13627	4.09421	4.04324	4.04285	5.41692	4.27319	5.45135	5.03677	4.99175	5.55891	3.30871	3.70129	4.21816	3.6499	4.49679	3.68327	3.93564	4.4901	3.87675	3.90191	3.39334	6.40931	5.62444	5.43901	3.96493	4.1222	3.9189	6.02259	3.83378	3.97085	4.19074	3.92267	3.91492	5.29298	4.71672	3.41412	4.05415	4.29001	4.35172	5.21721	3.8599	5.45659	3.71607	3.70967	3.32702	3.86842
1.14277	1.6126	3.27689	0.935821	2.05034	1.26813	1.60351	2.31738	0.693429	1.53657	1.29359	1.27141	1.11949	0.959625	1.69184	3.89795	0.568398	0.779455	1.80036	0.894887	1.98457	2.06097	1.40308	1.86655	1.8347	1.09502	1.51278	1.90672	1.19612	1.6386	1.2377	1.03176	1.72846	2.0953	0.940367	1.90377	1.69279	1.05174	1.97089	2.42243	1.69386	1.86394	1.58694	1.19978	1.70714	1.71693	1.85881	1.57514	1.48049	1.08676
5.40797	6.14155	5.8329	5.0977	5.9169	5.31409	5.47767	6.07636	4.97205	5.22106	5.65018	5.39245	4.78976	5.55145	5.3203	5.77551	4.93064	4.94334	5.971	4.78844	5.49862	5.97528	5.11244	5.5959	5.59984	5.82613	5.95608	6.08199	5.19753	5.71942	5.62071	5.70683	5.68069	6.19034	5.30465	5.53119	6.14849	5.32086	5.76133	6.03433	5.70108	5.50017	5.74788	4.89635	4.87987	5.60489	5.97265	6.24968	6.13918	5.5222
3.20056	3.65218	5.4197	1.89488	3.77891	0.973516	1.40533	2.6858	1.11926	2.4334	3.49714	0.952497	3.06877	5.4859	4.26186	3.87504	4.14394	2.50454	4.73295	2.75765	4.38725	2.72214	3.19519	3.96889	4.38656	1.32839	2.00991	3.29118	3.42323	4.12817	6.01004	1.75784	4.46003	1.04261	1.32103	2.39949	3.49301	1.35967	2.37872	1.84516	2.56925	2.15393	3.75704	1.60549	1.59644	3.06561	1.93989	0.262021	3.80995	4.91407
-0.718716	1.50008	4.33389	-0.879437	1.68559	-0.406587	-0.521148	-0.0887599	-1.01358	-0.366998	-0.282513	-0.579202	1.42236	0.416711	0.959668	2.65927	-1.19104	-0.592853	0.0725164	-0.466499	-0.258868	0.576913	-0.00836658	0.280572	0.79464	-1.01262	-0.528109	0.0713472	-0.806688	-0.321769	0.139373	-1.56754	-0.347254	-0.60804	-2.60206	-0.513565	-0.184731	-0.262208	1.01867	-0.130642	-0.943079	-0.567371	-0.0995283	-0.819428	-0.843035	0.333565	0.21301	-0.572117	-1.11822	1.20611
-0.0930824	0.300656	1.05046	0.0579958	0.405759	0.10861	0.284539	0.64238	0.083744	0.575675	0.400615	0.409836	0.0642338	0.350336	-0.286831	0.544506	-0.0226746	0.0450139	0.45488	-0.226097	0.0451064	0.361439	0.0902138	0.449755	0.0999947	0.373662	0.51312	0.261503	0.235822	0.365146	0.189984	0.475148	0.526871	1.51057	0.309927	0.904037	0.979261	0.160037	0.486032	0.574144	0.31524	0.46316	0.250735	0.0371294	0.0549245	0.386329	0.519043	0.929507	1.0982	0.514368
0.874897	0.568512	0.689494	0.845004	0.712581	0.974209	0.68547	0.605133	0.63301	0.778797	0.657584	0.420088	-0.084939	0.398626	0.00757027	0.448999	0.530864	0.878705	0.0206871	0.29745	0.153631	0.546916	0.530143	0.572093	0.55985	0.67485	0.497575	0.806714	0.692555	0.576109	0.011703	0.759232	0.474243	0.860127	0.740188	1.98793	-0.0315571	0.575358	0.730272	0.519575	0.9654	0.928981	0.747431	0.494232	0.473036	0.77031	0.495016	0.467772	1.30501	1.44098
1.00081	2.1721	5.81516	1.40911	3.78257	1.61582	2.01204	2.96808	1.82721	2.31546	2.26892	2.1532	4.2435	2.88087	2.20789	3.94887	1.1039	1.55459	1.73098	1.82075	1.59713	1.66539	1.24633	1.66307	2.7673	0.683461	1.16547	2.60727	1.17008	1.73647	1.57033	0.707497	1.69583	1.94141	1.23815	0.7564	1.02352	1.84553	3.55663	1.83108	1.15184	1.84228	1.6723	1.41522	1.40484	2.44694	1.24206	0.895468	1.0564	2.07738
3.05499	2.89231	2.85208	3.42056	2.92541	3.22699	3.30822	3.05964	3.47189	3.10949	3.36762	3.52929	3.29238	3.41362	2.96804	2.64711	3.04623	2.93377	2.46143	2.88653	3.05479	2.6411	2.82187	2.87961	2.7896	4.58891	4.11782	4.15111	3.18793	3.12429	2.3017	4.3153	3.27837	3.9834	3.25207	2.50966	2.08921	3.50961	3.41979	2.8697	3.4857	3.33719	3.4714	3.59975	3.40501	3.5131	2.80248	2.70727	3.38608	3.31784
1.20667	-0.229893	0.129925	1.55457	0.0459495	1.81193	1.43745	0.479647	1.26506	1.18227	0.888466	1.97568	0.728897	1.25159	1.36083	-0.166477	1.27356	0.938767	-0.0298109	1.92777	0.85088	-0.0866556	1.0624	0.77564	0.731047	2.50905	2.0898	1.52149	1.62364	0.915547	-0.123542	2.13572	0.964809	0.46364	1.71905	-0.424451	-0.322224	1.4268	0.929241	-0.28785	1.55304	0.984817	1.01786	2.00104	1.70031	1.27305	0.514376	-0.215106	0.483402	0.893148
1.08021	1.272	2.16296	1.25185	1.18936	1.22847	1.10281	1.15025	1.06778	1.14079	0.935552	0.827081	0.940838	0.992445	0.54082	0.661939	0.992375	0.906194	1.00699	0.618385	0.811944	1.02207	1.16047	1.05254	0.714243	1.46646	1.16401	1.27999	1.23332	1.13481	0.868114	1.37161	0.776241	1.24752	0.922651	0.56316	0.885071	1.27626	0.898515	0.99033	1.16023	0.89567	0.740331	1.14099	0.86984	1.32138	0.992007	1.19382	1.45703	1.16006
2.6111	2.51739	3.91817	2.20136	2.75015	2.98803	2.82976	3.6546	2.32475	3.36476	2.39348	2.52889	2.21498	2.13474	2.23971	3.6013	2.38302	2.43349	2.40186	2.64699	2.86142	2.9178	2.7998	3.07386	2.82095	2.46681	2.64803	2.84963	2.38713	2.82399	3.13068	2.49821	2.93105	2.70471	2.50828	3.06455	2.7297	2.64912	2.76317	2.87541	2.61593	2.94073	2.45121	2.25022	2.41135	2.58619	2.73751	2.70785	3.12443	2.49894
2.03509	2.07493	1.98321	2.00963	2.86007	1.96818	1.84678	2.88113	1.7473	1.9765	2.46259	2.14003	1.76216	2.41096	1.71697	2.56057	1.81366	2.2248	2.23528	1.94788	1.81597	2.43368	1.80011	2.1838	1.94643	2.06427	1.98091	2.28095	2.02106	2.30779	1.00869	1.92126	2.09446	2.32037	2.41167	3.45822	2.647	2.0056	2.71338	2.74068	2.31879	2.5514	2.42071	2.20949	2.39095	2.75841	2.44042	2.34367	2.31415	2.57284
-1.47063	-1.82988	-4.38018	-1.6358	-2.76529	-1.34618	-1.50242	-2.10387	-1.88084	-1.44513	-2.37065	-1.30049	-1.67264	-3.413	-2.06002	-1.90429	-1.18268	-2.56649	-2.06721	-1.20265	-1.4281	-2.48389	-2.61478	-1.78048	-3.92406	-1.35995	-1.48052	-1.9388	-1.54237	-1.85923	-1.58491	-1.15382	-4.23614	-1.65027	-1.56339	-3.12536	-2.00656	-1.50039	-1.1805	-1.88532	-1.42989	-1.58663	-2.73204	-3.08016	-2.77127	-1.59169	-1.50867	-2.96569	-1.73499	-2.16673
0.58821	-0.983466	-0.698351	0.728073	-0.0197043	0.653213	0.365202	0.192231	1.20043	0.520136	1.05162	0.8405	0.664438	0.601541	0.32205	-2.5471	0.475858	0.0157542	-0.672841	0.629988	0.119142	-0.102993	0.465787	0.0192194	-0.133301	1.92047	1.6709	1.15057	0.449241	0.268466	-0.714085	2.14884	0.265126	0.834254	0.365878	-0.79257	-0.841195	0.811469	0.410593	-0.157564	0.278013	0.755633	0.798282	0.922429	0.493265	1.26589	0.443857	0.901541	-0.491791	0.54373
1.80644	2.44155	3.27564	1.66311	2.31696	1.65725	1.72818	2.35222	1.71565	1.84693	2.22366	1.23096	1.47523	1.96791	1.41584	2.43947	1.76069	1.71311	1.99591	1.29616	1.7188	1.8898	1.5426	1.91384	1.81935	1.97163	2.00232	2.34909	1.90044	2.04675	1.87731	2.12971	2.09334	3.11511	2.07905	2.29568	2.70887	1.69992	2.04429	2.0871	1.4308	1.96367	1.97985	1.43111	1.62396	2.1443	1.84545	2.12031	2.59151	2.11777
0.0695019	0.860459	0.356039	-0.0676661	0.287899	-0.0291748	-0.0686178	0.608141	-0.280737	-0.162745	-0.0413313	-0.154606	-0.0321198	-0.145689	-0.40213	0.650352	-0.373573	-0.219961	0.604034	-0.294086	0.0651193	0.478708	-0.240691	0.0801029	-0.0798883	0.268078	0.221894	0.254248	-0.0287619	0.111435	0.139141	0.227657	0.184252	0.1298	0.0487666	0.433944	0.761896	0.0450053	0.296466	0.658773	-0.189561	0.0587616	0.00200558	-0.518092	-0.276202	0.0559464	0.478324	0.537924	-0.184367	-0.00969267
2.99895	2.17356	3.15522	3.52603	2.99643	3.84488	3.77181	2.94541	3.33339	3.24074	2.89964	3.02927	2.3496	2.91575	2.40433	1.83001	3.09269	2.84576	2.31333	2.31702	2.6418	3.06185	3.21246	3.11446	3.22254	3.60338	3.46349	3.38719	3.09135	2.8542	2.11089	3.82966	3.46072	3.56654	3.53496	2.53925	2.76344	3.49736	3.71442	2.82604	3.28583	3.27821	3.11981	3.11302	2.8245	3.3931	2.93885	3.13698	1.87666	2.62769
2.78653	3.87633	3.03402	2.56116	3.23553	2.68592	2.93236	3.57802	2.25876	2.51314	2.6941	2.8538	2.27103	2.6719	2.87706	3.47717	2.31283	2.34701	3.12894	2.3066	2.87443	3.11937	2.61219	3.01209	2.88099	2.98529	3.26864	3.30314	2.62465	3.10039	2.59712	2.89441	3.00842	3.56861	2.67096	3.0338	3.41177	2.60003	3.14622	3.74747	2.8443	2.96558	3.13325	2.29481	2.41303	3.0047	3.23552	3.48996	3.63836	2.8378
1.58122	1.60399	2.59618	1.45635	1.62168	1.6676	1.67039	1.32854	1.12151	1.6627	1.38086	0.75343	0.122415	0.64149	0.297513	1.11035	1.00661	1.08809	1.47172	0.73105	1.95915	1.74217	1.30121	1.34016	1.95302	0.924274	1.80933	1.39788	1.31421	1.00018	0.670996	0.916981	1.34153	2.094	1.49578	1.31027	3.20441	1.24352	1.66476	2.16602	1.30844	1.62732	1.24807	0.779184	1.14959	1.3913	1.87002	1.82931	1.26397	0.799001
2.4912	2.81858	1.49645	2.47134	2.83827	2.51023	2.7507	2.90441	2.50607	2.78939	2.77124	2.48888	2.3188	2.27491	2.11883	2.65077	2.29652	2.29641	2.71895	2.08874	2.24094	2.7526	2.40816	2.53208	2.37849	2.90319	2.80861	3.09161	2.57941	2.60497	2.27455	2.85107	2.60884	3.04244	2.59289	2.86698	3.36153	2.5431	2.89208	3.05731	2.57003	2.56918	2.62324	2.19187	2.37609	2.69073	2.79317	2.95303	3.48153	2.40893
0.544562	-0.607481	-2.87042	0.843758	-1.29193	0.966349	0.497262	-1.54018	0.135503	0.400563	-0.882122	-2.4737	-1.79387	-1.39544	-2.7464	-3.08217	0.33607	-0.0541377	-1.61062	0.934761	0.478862	-1.74658	0.770319	0.812611	0.313313	-0.0522966	-0.813508	-1.00757	-0.122206	-0.894826	-3.20679	-0.930758	-1.99354	-2.00522	-0.244275	-2.06789	-2.69126	-0.575359	-3.65922	-2.83874	-0.108477	-2.15102	-3.14662	0.378598	-0.4533	-1.16059	-0.363802	-1.15223	-1.13433	-1.12685
8.8256	7.17213	6.01612	8.65673	7.29757	8.93118	8.92952	7.94988	7.9931	8.01959	7.49342	8.59364	7.16746	7.33292	7.26783	5.34202	8.48052	8.55826	8.01353	8.68344	8.2662	7.85155	8.23207	8.40486	7.96612	8.41991	8.26704	7.88915	8.41832	7.61998	5.46615	8.35667	7.75142	6.83816	7.39413	5.34231	6.81102	7.97958	8.03369	5.88771	8.42747	8.27814	7.52481	8.81606	7.88734	7.13667	7.31736	6.58155	6.67665	7.41844
8.66828	7.09105	5.94867	8.68018	7.26981	8.8813	8.86976	7.83731	7.79168	8.00381	7.28509	8.51182	7.18304	7.14367	7.33486	5.39534	8.3422	8.4428	7.99604	8.54009	8.12013	7.70176	8.17348	8.36403	7.90879	8.32737	8.22531	7.75293	8.43506	7.59827	5.41061	8.09588	7.66745	6.63661	7.13414	5.54088	6.65673	7.70366	7.93613	5.85784	8.25083	8.21972	7.42747	8.57774	7.68101	6.99344	7.11319	6.42043	6.47126	7.35819
9.12311	7.69745	6.20494	8.94587	7.66978	9.16878	9.1616	8.4183	8.46491	8.47588	7.99985	8.95528	7.57149	7.65583	7.74385	5.77605	8.7933	8.97583	8.6551	9.25816	8.47484	8.15781	8.67023	8.7574	8.19931	8.76075	8.63096	8.16231	9.10269	8.2819	6.09686	8.58304	8.03282	7.01563	8.13562	5.90124	7.59723	8.3449	8.24107	6.39993	8.55631	8.60472	7.90327	9.33899	8.79483	7.83429	7.83364	7.21903	7.13967	7.94969
1.66915	1.11399	0.230072	1.41581	1.14341	1.49173	1.32586	1.43871	0.992058	1.26946	1.19286	1.20478	0.579935	1.30038	1.2308	1.14148	1.30046	1.46877	1.38504	1.35501	1.07935	1.19064	1.22411	1.35456	1.10286	1.08686	1.10725	1.12749	1.60526	1.53101	0.546824	1.03784	1.10747	0.940613	1.58713	0.939019	1.37175	1.31136	1.44722	1.16217	1.48681	1.51064	1.50733	1.3336	1.38801	1.64881	1.22209	1.21933	1.62358	1.35271
4.34091	0.72964	1.26794	5.01524	3.12402	5.14791	4.47074	4.39679	5.27123	4.37706	4.70982	5.34914	4.6913	4.16038	4.51755	1.18681	4.75275	3.99482	1.29042	4.76931	3.49122	1.59535	4.04966	3.46482	3.20467	6.68913	6.08666	6.12308	4.2139	3.04748	0.985133	6.51884	3.48094	4.88556	4.67128	1.58253	2.36738	4.81814	4.0181	1.86349	5.09867	3.88282	3.80216	4.91964	4.12074	4.78328	3.61337	4.19545	3.92167	3.74498
-2.09269	0.233903	2.03546	-1.95784	-0.567196	-2.11179	-1.66174	0.86019	-2.79511	-1.8149	-1.4059	-2.95715	-1.73655	-1.70533	-2.83865	1.08647	-2.49301	-1.69488	-1.23983	-3.21137	-0.56326	-1.3648	-1.51275	-1.52873	-0.682916	-2.05506	-1.66748	-0.266501	-3.16527	-1.50618	-2.68695	-2.01053	-0.421746	-0.0179405	-1.89279	-0.968606	-0.887518	-1.96342	-1.38259	-0.622844	-2.24422	-0.858754	-0.653051	-1.71445	-2.05955	-1.71694	-0.0244026	-0.918864	-1.88508	-1.14914
-0.671304	1.73395	3.90994	1.47369	3.18371	0.704715	1.46558	3.28809	1.39116	1.82563	1.47848	1.80594	3.8031	2.60265	1.50652	2.49594	0.212352	0.52645	-0.316292	0.999668	0.539038	1.89897	0.37478	0.736567	1.95308	0.753414	0.367413	1.51123	-0.0679216	0.904969	1.29781	0.93999	1.40656	2.27942	1.77106	1.10839	1.89899	1.93421	3.03159	1.59129	0.65186	1.76084	1.06749	0.80681	0.89511	2.54151	1.95218	2.39052	2.141	0.657007
-2.52983	-3.39054	-1.4595	-2.68547	-1.24981	-0.999554	-3.08817	-2.37932	-3.57398	-2.53588	-2.58018	-2.55624	-1.65839	-2.82886	-2.46035	-1.13305	-2.47371	-2.92985	-3.18964	-2.59671	-2.09271	-2.70749	-2.1256	-2.08205	-3.22697	-3.11578	-0.648675	-2.87742	-3.02637	-2.48011	-3.39658	-3.99701	-2.7843	-2.39156	-3.19366	-2.6696	-3.0547	-1.72555	-1.26389	-1.99427	-1.98724	-1.25763	0.372965	-2.61268	-2.4768	-2.54726	-3.70116	-2.01987	-2.49386	-3.95445
1.37969	0.535074	0.207366	1.40057	0.773273	1.13231	0.926009	0.631177	0.934345	1.31365	0.868147	0.641591	0.51933	0.769705	0.458958	0.170056	0.510432	0.876588	-0.514878	0.656805	0.286933	0.416039	0.789327	0.96708	0.825743	0.834028	0.7459	0.41995	1.3538	1.10525	-0.515102	0.830189	0.689602	0.673717	1.51136	2.0728	0.37365	0.710636	0.607031	0.160891	0.925316	1.24875	1.01585	0.68413	0.785728	1.15669	0.842633	0.520067	1.51751	1.73845
3.12837	5.01118	2.86986	3.51237	4.35966	3.16732	3.27469	4.1851	4.19846	3.27975	4.50203	3.96474	4.10414	4.14244	3.71892	3.23117	2.98993	2.2943	3.06461	2.88826	3.60296	3.98252	2.83272	3.49912	3.34831	5.18962	4.70972	5.18729	2.48603	3.42033	3.44331	4.99514	3.52951	4.71406	2.27018	2.49707	4.33625	3.90549	3.89617	4.79015	3.1022	3.56446	3.91009	3.61931	2.80111	4.56548	4.43247	5.8007	2.9089	3.61418
0.355888	2.10975	0.811205	-0.670579	0.155146	-0.728843	-0.456461	0.383548	-0.304217	-0.397189	-0.260192	0.496447	-0.427602	0.210329	0.356	0.453038	-0.413866	-0.278755	1.28388	-0.407813	-0.06743	0.458357	-0.448446	0.381791	-0.0610037	-0.531467	-0.512163	-0.281623	-1.0766	-0.0504093	0.227116	-2.46425	0.0540261	-0.577647	-1.40441	1.07205	1.51486	-0.66626	-0.824419	0.425741	1.17512	1.17571	0.284593	0.255716	0.0965371	0.0406342	0.830116	-0.214011	-1.09362	-0.33346
1.22328	2.31106	1.67843	1.53408	2.48712	-0.0570135	1.28098	2.8363	-1.88946	0.776518	3.46758	-3.01591	-1.64194	3.36322	3.03918	2.27975	1.56913	1.2028	2.35626	1.18701	1.71852	1.65911	0.777736	1.43344	1.56929	-2.54477	1.39729	2.57526	1.00212	2.39179	2.80951	-2.68348	2.44532	3.40506	-2.32175	1.52942	3.38698	2.18912	2.63815	3.13915	0.810475	-3.26334	2.68298	1.75349	1.4678	1.59454	2.78632	3.8988	1.77754	2.71963
1.35954	1.22582	1.60545	1.63279	1.61169	1.48178	1.50261	1.68387	1.62222	1.27776	1.33904	1.44544	1.23933	1.16288	1.57401	1.68215	1.40816	1.24546	1.57237	1.29224	1.38034	1.4744	1.3181	1.36199	1.25593	1.86401	1.76532	1.74351	1.36902	1.36736	0.813951	2.01864	1.21756	1.332	1.30813	1.46287	1.38453	1.5258	1.22756	1.18587	1.36355	1.23962	1.19472	1.52069	1.40444	1.35715	1.27569	1.50572	0.961119	1.67729
0.79052	1.08488	1.09842	1.149	1.64797	1.10218	1.5844	1.26556	1.51067	2.40826	1.95773	1.28734	0.667027	1.09588	0.453201	1.68148	0.771182	0.381643	1.58553	0.0994663	1.20686	1.96431	1.62658	1.47104	1.83925	1.18603	1.41972	1.64158	0.95216	1.15719	2.15502	1.37097	1.74358	2.9694	1.20659	1.57839	2.14976	1.42696	1.71429	1.81441	1.05993	1.29249	1.31275	0.635521	0.985135	1.2751	1.96936	2.11976	1.24043	0.850611
4.26589	3.48689	3.28277	4.1191	3.6612	4.0692	3.94184	3.45198	3.18903	3.70477	3.56553	3.75521	2.57283	3.78706	3.52901	3.26317	3.68157	3.93744	3.61835	3.54475	3.63439	3.6165	3.73085	3.81655	3.55057	3.54575	3.6716	3.65205	4.11718	4.03566	2.89171	3.47179	3.51147	4.20206	4.0971	3.35613	3.91018	3.85224	3.91787	3.63148	3.98938	3.917	3.97212	3.72665	3.68728	4.13654	3.7904	3.45718	3.84037	3.46569
-1.46857	0.808253	-2.05193	-1.69726	2.14621	-2.31104	-1.27094	-1.23623	-1.62499	-2.45381	-1.83155	-1.12505	0.465491	1.38305	2.15229	2.66603	-2.95073	-2.63406	0.401846	-1.66507	0.0403752	1.1987	-0.103472	1.11038	0.884016	-1.98794	-0.0459538	0.23296	-0.806213	0.0211296	0.32143	-2.02283	-0.053988	-1.07614	-2.33434	-2.37144	-0.52042	-0.701787	-0.382559	-1.78052	-0.184917	-0.777343	-0.214554	-1.98669	-1.87874	0.294547	0.488998	-2.29796	-0.731682	1.98155
4.03835	4.03746	5.22089	3.13087	4.16318	3.95124	4.02336	4.19723	3.00049	3.86628	3.48848	3.9861	3.59467	3.18502	3.73105	4.25877	3.04158	3.36039	3.30156	3.99437	3.90705	4.07407	4.00687	4.06886	4.0537	3.60405	3.8891	4.16432	3.73124	3.72912	3.60248	3.37861	4.0258	4.06626	3.37296	3.79907	3.72025	3.61702	4.21675	4.14886	3.97613	4.22713	3.56846	3.35444	3.78265	3.83465	3.8121	3.93565	4.09448	3.54767
-2.42812	-0.680828	2.39006	-1.6665	0.766117	-2.28946	-1.15622	0.697783	-1.30987	-2.96296	-0.273417	-1.54772	0.143169	-1.03003	-1.1619	0.447784	-3.20383	-1.37698	-0.993577	-2.14606	-1.5587	-1.17682	-3.45079	-0.945024	-0.373422	-2.05709	-1.37829	0.133265	-3.00005	-0.551643	-1.43122	-1.47145	-0.734775	-0.406204	-0.924481	-2.41407	-1.0748	-1.09989	0.358891	-0.740217	-2.36436	-0.93722	-0.729995	-3.49919	-2.53057	-0.71207	-0.769134	-1.14153	-2.90007	-1.19966
0.481547	0.546866	-1.58527	1.35884	-0.0579238	1.65204	0.814322	0.0134664	1.83039	1.28692	0.672156	1.01914	0.240825	1.41674	-1.58059	-2.51367	1.38829	0.256692	-0.119501	-0.182418	0.0305867	0.368279	0.383528	-0.202598	-0.13313	2.17873	1.43432	1.34673	0.404259	0.0168352	-1.44775	2.48268	-0.102816	0.0951672	-1.17437	-1.93427	1.47515	1.30954	-1.03555	0.914299	0.959031	-0.406286	0.189634	1.68899	0.941278	0.483367	-0.88436	0.981706	0.111211	0.516774
1.60468	4.74919	2.35702	0.806392	4.85367	0.822385	1.70746	4.01864	1.69097	2.16581	2.53762	0.521716	1.31505	1.40504	0.182618	1.38312	1.00858	1.63321	0.267318	0.0354996	3.05634	1.90008	0.877574	2.27635	2.30327	2.20767	2.45692	3.8379	1.93694	2.06207	2.72775	2.09548	2.54831	4.69382	3.92737	3.10517	5.21338	3.12042	3.0184	7.40606	-0.0982695	2.77734	1.70338	0.511681	1.72389	2.97021	4.16146	6.61812	-0.00845718	0.919951
-3.34768	-1.18739	-0.862423	-1.90257	-1.46968	-1.79438	-2.00167	-1.23038	-2.56904	-3.25009	-1.55319	-2.29932	-1.86111	-1.97548	-2.38545	-1.46528	-1.90021	-1.42568	-1.35492	-2.04524	-1.66287	-1.5105	-2.98654	-2.99152	-3.25839	-3.54709	-1.99643	-1.82264	-3.00041	-2.0903	-1.96142	-2.82213	-2.26896	-1.81755	-2.24586	-1.47572	-1.3062	-1.75064	-1.47647	-1.13806	-2.88379	-1.73773	-1.6439	-2.67751	-2.03866	-1.9352	-1.62965	-2.92943	-3.29402	-2.77612
4.40356	5.40307	5.09734	4.18037	5.1457	4.32371	4.52092	5.0863	3.97093	4.21031	4.52808	4.31828	3.67657	4.0826	3.90495	4.91932	3.89325	3.90082	4.8703	3.88425	4.37089	4.86868	4.23732	4.39815	4.32085	4.72965	4.91187	5.03967	4.25554	4.53913	4.30766	4.44669	4.68498	5.36471	4.27355	4.43641	5.20426	4.38868	5.08571	5.62245	4.28106	4.62624	4.66772	3.74547	3.86803	4.55795	4.77509	5.03009	4.62599	4.36468
2.31412	3.19416	2.24606	2.40788	3.3138	2.34238	2.53122	3.08574	1.68705	2.01994	2.06557	2.1362	1.43879	2.04603	1.82363	3.06211	1.94002	2.04802	2.55668	1.73484	2.43559	2.85066	2.01314	2.52545	2.30488	2.36538	2.80565	3.09956	2.28431	2.52162	1.97495	2.27145	2.7375	3.25437	2.47129	2.78946	3.1315	2.19764	3.49396	4.09551	2.38758	2.87506	2.66929	1.95093	2.18456	2.84578	2.7746	2.84654	3.23822	2.76674
0.149388	2.48214	2.59349	0.044261	0.445311	0.0380096	0.143517	1.17401	-0.0812378	-0.366276	-0.321157	0.183258	-0.563491	0.204744	0.0436268	2.5019	0.14734	-0.169866	0.851988	-0.344321	0.187698	0.741513	0.185217	0.429151	-0.108236	0.279262	0.566491	0.774306	0.238461	0.360882	0.30661	0.113002	0.467749	0.231558	0.316987	0.637238	1.61054	0.0959249	0.119631	1.51393	0.490322	0.339451	0.118551	-0.199164	-0.134809	-0.0739508	0.624108	1.62833	1.11827	0.203741
0.233655	1.91247	1.45346	0.560661	1.08852	0.577985	0.886959	1.09032	0.284636	0.417397	0.809377	0.793342	0.327374	0.0846229	0.294367	1.00362	-0.104842	-0.122397	0.956988	-0.476126	0.613533	1.41234	0.463353	0.861981	0.822656	1.02555	1.21201	1.37192	0.325644	0.653652	0.871461	0.967419	0.710993	1.5958	0.107861	0.920546	1.1373	0.801458	1.25742	1.49872	0.730756	0.738111	0.864845	-0.13824	0.1024	0.608594	1.03898	1.41934	0.935401	0.325035
3.48858	3.5876	5.54081	3.65123	6.47713	3.92149	4.43495	5.48761	4.10241	4.78129	6.12071	3.70496	5.18634	3.80612	3.73923	5.3878	3.49181	3.26797	3.73371	3.06946	3.81024	3.6692	3.43662	3.68194	4.73477	2.90721	4.76774	5.22062	3.482	4.71466	3.86005	3.28568	3.89691	5.29517	4.0447	3.06273	3.14383	4.36684	5.55457	4.71332	3.40143	4.22933	5.50157	3.20278	3.62445	4.34572	4.60645	4.59653	3.15316	3.95299
1.53964	2.86919	0.363773	2.02468	2.83503	1.96865	2.05736	2.41146	1.86863	2.2112	2.37848	1.79422	1.97158	1.95024	0.934544	2.25347	1.52453	1.25412	2.3923	0.515786	2.33734	2.90259	1.82815	2.09747	1.97863	1.62683	1.44972	2.92526	1.48585	1.85263	2.21984	1.69318	2.01437	2.42197	2.11345	1.65408	2.88128	2.64728	2.42269	3.04481	1.87219	1.88884	1.96368	1.5995	1.80279	2.29536	2.46418	3.55279	1.43014	1.4888
1.55817	1.02953	1.4758	1.34765	1.93353	1.45276	1.92547	1.49488	1.45906	2.02769	2.03078	1.28607	1.20275	2.94858	2.07348	1.83422	1.83492	1.16332	2.67373	0.588393	2.21221	1.67917	1.79423	1.833	2.75898	1.51351	1.73338	1.86157	1.45895	1.82703	3.78675	1.32685	2.65253	2.64795	1.29878	1.83112	2.47906	1.30875	1.97195	1.57562	1.43986	1.67627	2.03048	1.15785	1.29112	1.76754	1.57998	1.51779	1.48243	2.65663
0.10126	0.347965	1.20441	0.415957	0.0134921	0.408401	0.220169	-0.285715	-0.105394	0.196035	-0.240314	0.205115	0.284732	0.133636	0.162319	0.625293	-0.0234022	-0.105655	-0.508565	-0.0408192	-0.441339	-0.41076	0.0765343	0.148872	-0.173055	0.644699	0.648065	0.170263	0.415621	0.295081	-0.723604	0.262552	-0.141605	-0.0765915	0.630407	-0.68731	-0.348371	0.0654397	0.426172	-0.486012	0.0138292	0.254986	0.141077	0.408679	0.307785	0.296281	-0.161074	-0.552835	0.00240517	-0.217698
3.012	2.47321	2.1154	3.14483	2.91905	3.15813	3.20194	2.5598	2.97417	2.83836	3.02999	3.12172	2.56063	3.17161	2.51908	2.33853	2.90601	2.781	2.68055	2.51029	2.77352	3.10227	2.93118	2.84485	2.65985	3.40889	3.17404	3.26357	2.9662	2.96571	2.21652	3.38402	2.83712	3.26792	2.84918	2.43152	2.53028	3.37012	3.169	2.8391	3.3185	2.89486	2.92097	3.06859	2.81295	3.35766	2.90314	2.96091	2.73212	2.74564
-3.2669	-0.452412	-0.240452	-0.846977	-0.879936	-0.889909	-1.50167	-0.34776	-2.07498	-0.915922	-1.03124	-1.61597	-2.11689	-2.58734	-2.18784	-0.800593	-2.61977	-2.20337	-0.882264	-2.78483	-0.720142	-1.6221	-2.251	-2.46977	-0.923726	-2.81147	-1.18443	-0.817441	-2.11031	-0.873318	-1.69251	0.371391	-0.793242	-0.829901	-2.69268	-0.673497	-0.698201	-0.660349	-0.893592	-0.732603	-2.18377	-1.10022	-0.804667	0.663453	-2.87863	-1.37827	-0.791345	-1.35152	-0.72418	-0.939474
2.5712	2.4715	1.8144	2.72189	2.94508	2.64186	2.76505	3.13821	2.2834	2.74286	2.50331	2.46968	1.7938	2.50306	1.83752	2.93579	2.33504	2.44047	2.90821	1.67486	2.86007	3.04659	2.47183	2.52559	2.62923	2.58524	2.79356	2.76753	2.67657	2.58634	2.11634	2.50118	2.84566	2.72773	2.86599	2.5131	2.99389	2.72194	3.14817	3.4888	2.37793	2.95813	2.8556	2.19824	2.37225	2.99176	2.85238	3.01296	3.25991	2.5317
0.662374	1.91916	1.32556	0.775704	3.1111	0.990102	1.43901	2.4503	0.740488	1.30393	2.68565	0.749764	1.64652	0.883097	1.01584	3.21847	0.866971	0.783291	1.30144	0.620572	1.46611	1.09703	0.866333	1.31032	1.67939	0.375873	1.66803	2.26218	0.820601	1.88397	0.857859	0.560478	1.611	2.54638	0.945442	1.82883	0.842044	1.14148	2.53137	2.29292	0.961355	1.65061	2.3762	0.497166	0.331865	1.03665	1.58154	1.13917	0.383489	1.38362
1.19933	2.00292	2.14116	1.57227	1.60818	1.29012	2.28626	1.09936	1.17822	1.53781	1.56632	1.51883	0.739272	1.2552	0.654406	0.811564	0.88698	0.610012	2.07261	0.189049	1.45576	1.9954	1.25559	1.47217	1.86144	1.36488	1.86832	1.62585	0.993258	1.61939	1.55904	1.14805	1.42878	2.43002	1.37454	1.85913	1.9553	1.89434	2.03712	2.28015	1.13189	1.35298	1.94415	0.734014	1.0578	1.55582	1.704	1.56253	2.15752	1.62462
-0.493717	-1.26087	-1.88978	-1.05674	-1.28185	-1.26019	-1.16491	-1.24248	-1.26142	-1.21815	-1.55243	-0.634099	-2.38812	-0.650788	-1.45615	-1.42014	-0.970842	-1.01602	-0.720243	-1.18681	-3.02673	-0.827141	-1.16317	-1.2719	-1.03383	-1.05995	-0.880424	-1.22003	-0.52793	-0.98276	-2.7132	-1.09013	-0.922411	-1.24668	-0.704503	-1.44134	-0.931033	-1.25207	-1.02718	-1.0333	-0.821264	-1.05668	-1.04668	-1.30165	-1.11373	-1.00766	-1.25448	-1.47353	-0.713404	-0.768656
-2.75887	-1.7423	-1.51875	-3.87601	-1.20899	-1.78129	-1.79518	-0.811337	-2.59835	-0.314771	-1.31807	-1.27104	-2.14159	-2.41914	-2.10861	-0.542635	-3.26695	-2.39426	-0.373856	-2.32091	-1.34288	-0.84631	-0.919654	-1.48114	-1.6239	-1.65261	-2.26301	-1.13778	-3.13114	-1.3496	0.033299	-3.3252	-1.21955	-1.60997	-2.30251	-1.85541	-1.17997	-4.07156	-1.63006	-1.39547	-1.57132	-1.2009	-1.79339	-3.33066	-1.6371	-2.46752	-1.27959	-1.85642	-1.60126	-2.69023
0.82937	1.27845	1.69177	0.529306	1.21914	0.617406	0.82228	1.83052	0.587744	1.19497	1.01492	1.00688	0.476701	0.782204	0.670347	1.55513	0.4803	0.673079	0.740733	0.408877	0.705602	0.584865	0.800417	1.16564	0.42547	1.56577	1.47041	1.50285	0.732423	1.39205	0.19785	1.3386	0.875655	0.951905	1.09697	1.37512	1.1064	0.599174	1.42321	1.37093	1.24697	1.34062	1.26703	0.747219	0.808307	1.18349	1.45587	1.11769	2.46556	1.63575
-0.919811	-2.12842	-3.84347	-0.911917	-3.48426	-1.53665	-1.42724	-2.28292	-1.33098	-1.7227	-3.67396	-1.52576	-1.74567	-1.36456	-2.00605	-2.35158	-1.36841	-1.93035	-2.09195	-1.23184	-1.88739	-1.80176	-0.871162	-1.52108	-1.77739	-1.6771	-2.01661	-1.96381	-1.13255	-1.20647	-2.37543	-1.88346	-1.80778	-3.4802	-0.802525	-3.25317	-3.04431	-1.16704	-1.15509	-2.52412	-1.56693	-1.14433	-2.03007	-1.35972	-1.24725	-1.08758	-2.49586	-2.70841	-2.78153	-2.35333
3.41146	3.47421	0.5127	3.87098	2.83969	3.0568	3.26674	2.69472	4.2393	3.238	3.86535	4.0343	3.56378	4.32323	2.32988	2.29508	3.39676	2.69895	3.56242	2.57316	3.11754	3.58684	2.96185	2.8941	2.37013	5.52917	4.8104	4.51491	2.80528	3.09399	2.89711	5.06589	2.91795	3.10912	2.65041	2.44963	2.43194	4.31557	3.90396	2.40999	3.20176	3.41509	3.40976	4.31058	2.87758	4.23556	2.7131	2.43702	2.0238	2.89727
-2.65354	-1.29311	1.59172	-1.88078	0.33633	-2.03222	-1.01322	-0.284304	-0.851254	-0.656115	-0.147601	-1.39047	0.579125	-0.819678	-1.67432	0.721433	-2.21004	-1.77613	-1.44382	-1.53848	-3.04078	-1.21497	-2.5518	-1.22257	-0.4942	-2.3889	-2.03764	-0.521426	-2.08341	-1.48033	-1.88313	-2.013	-2.3361	-0.872342	-2.48966	-2.24891	-2.35577	-1.30974	-0.20069	-1.2802	-2.3009	-1.41208	-1.18548	-3.35901	-1.71901	-0.931603	-1.68507	-1.62978	-2.04725	-1.3392
6.17644	8.23605	8.49683	6.44181	7.01777	6.49674	6.69788	7.29941	6.13535	6.32981	6.70547	5.89494	6.18491	6.25401	5.66106	7.44042	6.02692	5.79749	6.03898	5.46938	6.21299	6.58071	6.21166	6.4087	6.41778	6.73227	6.69487	6.90391	6.28431	6.3605	6.08378	6.577	6.37083	7.28808	6.62793	6.55092	7.39468	6.80042	6.76438	7.25748	6.31546	6.25306	6.32797	5.68703	5.53086	6.54826	6.81439	7.46317	7.3778	6.41727
-0.642883	-0.849858	-1.53356	-0.854355	-0.0435262	-0.533577	-0.356537	0.0841565	-1.14226	-0.563201	-0.266923	-0.971107	-0.779848	-0.537617	-0.99615	-0.434165	-0.889664	-1.30916	-0.046505	-0.866659	-0.485594	0.21275	-0.854893	-0.253276	-0.498628	-0.65523	-0.671088	-0.264703	-0.738034	-0.379487	-0.575614	-0.830752	-0.55616	0.107613	-0.664028	-0.251422	-0.702129	-0.816053	-0.257854	-0.199171	-0.67279	-0.614402	-0.531736	-0.680073	-0.627419	-0.176336	-0.291018	-0.184702	-0.746418	-0.452614
5.71138	5.90551	5.54801	5.90359	6.46783	5.78685	5.83386	6.3009	5.08584	5.40668	5.29051	5.44691	4.64941	5.36617	5.01993	6.02321	5.33139	5.27568	5.84969	4.78246	5.73073	5.89424	5.47518	5.70025	5.57221	5.50348	5.80232	6.07872	5.63719	5.53364	4.7717	5.45292	5.90703	6.26165	5.8116	5.50776	6.06324	5.6896	6.70865	7.21949	5.72139	6.08015	5.87752	5.40184	5.52913	6.07388	6.03406	5.88123	6.31381	5.83487
-1.2278	-2.31111	-2.33135	-1.28542	-2.30616	-1.26588	-1.47945	-2.21982	-1.43121	-1.3293	-2.35428	-0.0364971	-1.62728	-1.2144	-0.93163	-3.64636	-1.57146	-2.12034	-2.12768	-1.02267	-1.40645	-3.40378	-1.45221	-1.37459	-1.55506	0.225728	-0.249287	-0.610216	-1.61013	-2.08642	-2.68369	-0.796796	-2.14066	-2.32361	-1.50625	-1.65215	-2.15139	-1.65671	-1.65111	-2.6005	-1.37456	-1.56772	-1.46153	-1.2835	-0.703573	-0.941102	-1.97769	-3.04587	-2.3616	-1.95517
-0.360712	0.215684	-0.159601	-0.309538	0.364713	-0.0838346	0.0784235	0.289133	-0.427608	0.241543	0.242307	0.198844	-0.257102	0.306554	-0.00678253	0.278486	0.0508156	-0.342713	0.416897	-0.482351	0.0398088	0.207874	0.650738	0.2101	0.487937	0.364363	0.61614	0.49045	-0.244023	0.234664	1.13611	0.232892	0.539203	0.757435	-0.33683	0.549157	0.52376	-0.233776	0.482574	0.850813	0.258785	0.142331	0.150923	-0.412694	-0.353771	0.219784	0.505324	0.357329	-0.583557	0.20138
2.52972	3.16578	4.01022	2.3221	2.45291	2.39326	2.58499	2.89232	1.94014	2.36251	2.16643	2.21321	1.76608	2.31796	2.07172	2.81995	2.3232	2.50738	2.81298	2.0192	2.23555	2.59621	2.24633	2.6101	2.22152	2.39566	2.47925	2.54369	2.47022	2.70564	2.08162	2.3442	2.46085	3.01459	2.56984	2.68621	2.8543	2.34827	2.75189	2.6304	2.45983	2.5877	2.41742	1.9283	2.18416	2.47339	2.69217	2.68873	2.95608	2.46355
0.425915	1.08307	1.0338	0.345967	1.09353	0.41412	0.774506	1.50398	-0.0149536	0.491562	0.355175	0.767216	-0.133435	0.690179	0.349405	3.37712	-0.00965977	0.21469	0.419604	-0.175996	0.444673	0.608959	0.235959	0.679146	0.366362	1.43847	1.23341	0.699938	0.106892	0.721899	0.997248	0.603862	0.453866	0.684075	-0.158862	1.2259	0.32273	-0.171979	0.412108	0.657145	0.381766	0.579371	0.580868	0.0262203	-0.306634	-0.26413	0.951412	1.353	-0.169883	0.16469
-0.526982	2.59236	3.10001	-1.13591	0.578569	-0.42457	-0.321859	2.09637	-0.758287	-0.257246	-0.861961	-0.165631	1.08982	-0.817414	0.154409	1.81734	-0.955592	-0.730327	0.0363779	-0.138082	-0.1827	-0.216792	-0.378326	0.250189	-0.0932465	-0.748723	0.0014019	0.642076	-0.964874	-0.346966	-0.404476	-2.36605	-0.845008	-0.701249	-0.730761	0.35523	-0.605536	-1.14016	0.240278	1.09154	0.527215	-0.775406	-1.37711	-0.127103	0.0448289	-0.0901012	-0.661592	-0.418845	-0.782329	0.612607
-0.251913	0.789418	4.67239	0.105793	3.65229	-0.0994482	0.622133	1.45173	0.0461159	0.27898	2.65272	0.52177	1.32789	0.962027	1.03054	1.41856	-0.152327	-0.27909	-0.178988	0.210911	0.269269	0.423497	-0.169701	0.346972	1.67297	-0.652955	1.53704	1.88657	-1.01872	0.996017	-0.0613475	-0.367275	0.00271654	2.14138	0.359769	-0.728167	-0.997415	0.613521	2.97269	1.86932	-0.203233	0.848949	2.68248	0.0618057	-0.0941005	0.850473	0.778761	0.706206	-0.88696	0.0643353
-0.497667	0.439602	0.444308	-0.327495	0.218137	-0.204189	0.0331688	0.150888	-0.711646	-0.139756	-0.302995	-0.293205	-0.804987	-0.398594	-0.626533	-0.0198994	-0.683131	-0.695427	0.0518274	-0.710991	-0.0876374	0.00871849	-0.227202	0.12019	0.012557	-0.0628014	0.169511	0.381947	-0.747107	-0.268291	-0.232418	-0.173618	-0.0719132	0.291569	-0.408883	0.106974	0.331622	-0.443722	0.0925684	0.324205	-0.212478	-0.23324	-0.224593	-0.475337	-0.695734	-0.35786	-0.133121	0.0399685	-0.0684938	-0.305783
-1.75863	-0.603573	0.0495257	-1.00099	-1.36577	-1.56252	-1.43876	-0.554937	-3.20658	-1.55994	-2.95736	-1.32134	-1.29186	-2.8206	-1.70135	-0.702379	-2.2403	-2.0775	-0.96547	-1.71232	-2.76656	-1.14507	-2.84459	-1.52686	-1.92699	-3.07035	-1.19115	-1.15337	-2.11129	-1.71436	-2.30248	-1.56068	-1.04981	-0.869309	-1.8566	-1.29995	-1.5342	-2.79366	-1.73177	-1.0189	-2.78585	-1.56221	-1.62698	-2.7122	-2.68984	-2.20261	-1.28557	-1.3731	-1.1857	-2.17447
2.06662	3.34567	2.50213	1.89677	3.12066	1.83572	2.11529	2.59522	1.97956	1.95754	3.31474	1.94392	1.67112	2.09498	1.76829	3.27623	1.42315	1.40043	2.30814	1.74317	1.97557	2.8383	1.55555	1.97989	1.7872	2.66722	2.80299	2.5786	1.23434	2.70957	2.2458	2.62365	1.95301	2.92086	2.1427	3.10813	2.11566	2.12919	2.67688	2.66228	3.16902	2.19276	3.07485	1.81173	1.62844	2.41026	2.50575	3.12667	3.96492	3.23497
1.54929	1.70351	1.28428	1.57479	1.95604	1.25699	1.75833	1.40082	1.62739	1.67553	1.98057	1.34918	1.36592	1.88226	1.27185	1.67675	1.43	1.44247	2.24348	-1.74312	1.68182	2.19073	1.66006	1.9399	1.97715	1.47559	1.45489	1.8103	1.56938	1.53471	2.28498	1.51616	1.91442	2.3034	1.52078	1.48137	2.0981	1.53214	1.68671	1.55673	1.27775	1.09774	1.59698	1.7841	0.882596	1.39941	1.73609	1.81325	1.76708	1.85574
-0.867059	-0.333082	1.62626	-0.859843	0.983395	-0.485879	-0.522487	0.604596	-2.73097	-0.515931	0.848919	-0.427297	0.505101	-0.418976	-0.71078	1.22958	-2.61243	-0.0569367	-0.493086	-0.439273	-0.469832	-0.632548	-0.917132	-0.902018	-0.240333	-3.35221	-0.270554	0.234797	-0.921394	0.234179	-1.39584	-0.808017	-0.268967	0.383083	-0.508817	-2.05561	-1.22324	-0.0221725	0.534511	0.120287	-0.621762	-0.066699	0.513329	-0.913315	-1.20235	-0.666594	-0.204927	-0.327136	-1.23175	-0.265721
3.7715	6.12227	4.07472	3.69823	4.38107	3.77046	4.07906	4.86564	3.17045	3.85254	3.85513	3.52875	3.14506	4.12076	3.57913	4.18167	3.51953	3.37959	4.52019	3.00587	3.97194	4.35437	3.71478	4.20053	4.10203	4.30399	4.24858	4.55775	3.6149	4.02214	4.50138	4.0348	4.36876	5.62282	3.40983	4.79903	5.11143	3.64059	4.24742	4.75099	3.87201	4.04151	4.06982	3.31262	3.37273	3.98615	4.12952	4.51714	4.7685	4.35882
0.231558	0.411986	0.149686	0.33467	1.0293	0.313431	0.413751	0.870936	0.179276	0.558217	0.519841	0.617109	0.568691	0.397871	0.3994	1.00451	0.0875101	0.0718999	1.25685	0.0845404	1.1016	1.50815	0.417134	0.498413	0.719227	0.087492	0.506918	0.743547	0.0801001	0.531168	0.525898	0.283956	0.899065	0.677526	0.263211	0.729106	1.12669	0.373115	0.84738	0.750065	0.627164	0.642029	0.632378	0.233757	0.524387	0.557848	1.14048	0.83969	0.734556	0.553328
-2.26164	-1.89337	-2.42234	-3.15257	-1.64676	-3.14275	-2.85986	-1.79434	-2.37729	-2.51366	-2.3939	-2.8811	-2.50242	-3.10116	-2.28369	-1.67122	-2.97019	-2.89604	-1.63139	-1.51935	-2.08746	-2.01816	-3.50162	-2.78591	-2.71257	-2.21218	-2.01408	-2.13267	-2.91096	-2.59162	-3.72428	-2.66646	-2.80813	-2.59326	-2.96578	-2.02101	-1.59064	-2.75162	-2.22322	-1.67891	-2.21526	-2.1407	-2.88706	-2.47721	-2.58387	-2.27344	-1.61225	-1.45575	-2.74534	-3.54041
3.16706	3.73885	3.90256	2.9508	3.71329	3.09696	3.09997	3.87394	2.46186	2.43815	2.97286	2.97596	2.40366	3.16341	2.67713	3.74364	2.47482	2.74239	3.318	2.4309	3.13539	3.37148	2.8718	3.15125	3.25449	3.04236	3.29475	3.20378	2.85529	3.21914	2.82818	2.92482	3.26387	3.72074	2.95923	3.28001	3.48461	3.06454	3.59509	3.97556	2.99096	3.46592	3.40795	2.59267	2.92292	3.27944	3.26184	3.07941	3.18362	3.19356
0.487995	0.207144	0.0435843	0.352877	0.0485215	0.466889	0.475965	-0.0867648	0.235732	0.355692	0.351746	-0.197364	-0.73118	0.110083	0.136744	0.0263424	0.323469	0.595809	0.26667	0.261818	0.141087	0.386117	0.488848	0.345285	0.217077	0.502748	0.572254	0.495539	0.529535	0.330804	-0.34312	0.39791	0.203129	0.513375	0.33954	-0.245609	0.343774	0.330185	0.341561	0.297594	0.404957	0.176304	0.267433	0.495284	0.0323081	0.124022	0.418476	0.227626	0.450158	0.252113
-0.2324	-0.89882	-0.928677	-0.432906	-0.781519	-0.317554	-0.249545	-0.667765	-0.340569	-0.867824	-1.21175	-0.391941	-0.922641	-0.37457	-0.377434	-1.12192	-0.337926	-0.445443	-0.86141	-0.330983	-0.577269	-0.740363	0.0834618	-0.184092	-0.135495	-0.566947	-0.428164	-1.13352	0.0300388	-0.303273	-3.08912	-0.502827	-0.79287	-0.658596	-0.362482	0.108184	-1.19852	-0.245469	-0.73812	-1.75692	-0.0476923	-0.320527	-0.474607	-0.858598	-0.185428	-0.411101	-0.768294	-0.936561	0.67595	-0.554471
1.22985	2.40477	3.34965	1.20643	2.56985	0.618645	0.894558	2.24354	2.10218	0.642256	2.67959	2.3953	1.87371	1.72788	1.42716	3.26498	0.952466	-0.255313	0.665869	0.806649	1.17893	1.33033	0.846174	0.469074	1.00323	2.9883	2.94451	2.73058	0.34116	1.46517	0.827589	3.00852	1.22386	1.89036	0.760318	0.382964	0.518163	2.56044	1.95301	2.69805	2.24353	2.07373	2.60312	2.22924	1.51409	1.84339	1.40261	2.29768	-0.284605	1.07252
-3.21301	-2.84749	-2.33908	-2.1222	-0.706405	-2.9002	-1.11655	-1.9699	-3.11386	-1.26385	-2.00813	-2.67457	-1.30771	-1.8594	-0.864551	-1.0236	-2.37813	-2.51158	-3.58974	-1.93218	-0.780494	-1.14876	-2.74445	-2.40852	-0.702162	-2.25839	-1.78675	-1.34833	-2.52227	-2.10546	-1.11181	-1.60964	-1.2128	-0.776635	-2.60308	-2.88635	-2.88603	-1.6185	-1.44467	-2.3865	-2.00224	-2.20304	-1.76725	-3.37481	-1.61373	-1.89786	-1.59987	-2.44163	-2.86978	-1.132
2.45209	0.769822	1.29496	2.35739	2.50608	2.30147	2.26106	2.29894	2.20088	2.86315	1.46156	2.22828	2.78907	1.97283	1.37335	0.434501	2.15045	1.60916	2.01705	1.07217	2.15712	1.95252	2.42817	1.9812	1.98754	2.41387	1.95541	2.70269	2.40079	2.11912	2.45308	2.00305	2.05916	2.54123	2.53006	0.851417	-3.82306	2.77268	2.22489	0.440588	3.10117	2.29306	1.69162	2.38251	2.21502	2.39678	1.53418	0.879828	1.99939	2.35392
-0.129996	-0.521262	0.776835	-0.0140095	1.72033	-2.66389	0.313798	0.584078	-0.886788	0.315636	1.03554	-0.522413	1.29744	-0.258059	-0.0389109	0.395607	-0.299244	-0.286326	-0.24828	-0.243092	-1.78898	0.618458	-2.06587	-0.398537	0.258036	-2.5546	0.215178	0.714945	-3.24936	0.694104	0.414556	-2.91555	0.124206	0.388975	-0.23888	-0.725795	-2.7143	-0.016644	0.708437	0.160275	-4.08827	-0.192907	0.8544	0.697087	-2.15618	0.430638	-0.509691	-0.825784	-3.48293	-0.00652552
4.14087	3.4944	3.27754	4.45466	4.00942	4.37258	4.55811	3.6802	4.19862	4.26865	4.13062	3.90215	3.7346	3.82199	3.35947	3.5447	4.03443	4.01182	3.03492	3.49032	3.63174	3.58093	4.05234	4.22251	4.05018	4.38248	4.25358	4.43982	4.29707	4.21329	3.30768	4.58061	4.20138	4.45275	4.65214	3.13374	3.41533	4.51914	4.60539	3.66401	4.15017	4.19541	4.03086	3.90659	3.9995	4.37459	3.63004	3.86618	3.11332	3.73798
0.725463	-0.0973659	-2.22725	0.834031	0.531474	0.885464	0.628483	0.0493417	0.0315762	0.373558	0.447508	0.299318	-0.605984	0.412632	0.147783	-0.330184	0.282152	0.469125	-0.0193539	0.517417	0.264117	0.339935	0.368211	0.676851	0.308004	0.310601	0.360736	0.299561	0.519597	0.720949	-0.174825	0.0110216	0.336865	0.0443916	0.854775	-0.461463	0.351407	0.230943	0.4529	-0.12743	0.854904	0.446604	0.794288	0.438775	0.644892	0.753405	0.661382	0.420812	0.696274	0.519
0.152093	-2.31086	-3.96368	-0.47006	-1.32095	-0.2327	-0.213043	-1.32331	-0.832756	-0.47825	-1.54008	-0.569021	-2.90728	-1.08304	-0.805902	-2.31572	-0.466537	-0.263548	-2.82464	-0.145406	-0.784008	-1.06488	-0.360318	-0.604251	-0.304437	-1.74845	-1.11733	-1.49567	-0.41301	-0.275495	-2.6952	-1.53122	-0.534299	-1.46509	-0.440436	-2.47759	-1.57401	-0.776214	-0.747725	-1.59177	-0.210223	-0.153627	-0.0667515	-0.287004	-0.0370145	-0.559553	-0.807898	-0.817069	-1.89093	-0.909363
-0.426799	0.54174	1.2644	-0.703546	0.417158	-0.626004	-0.621122	0.196928	-0.764579	-0.160448	-0.315077	-0.485151	-0.559187	-0.395486	0.115766	0.874851	-0.931748	-0.900034	0.777362	-0.952583	0.228	0.68861	-0.316622	0.347311	-0.0313644	-0.635757	-0.225594	0.167642	-0.609635	-0.0533724	0.271539	-0.411687	0.159014	0.214344	-0.749403	0.630809	0.682878	-0.499483	-0.0242777	0.851583	-0.190129	0.053771	-0.235478	-1.04661	-0.739359	-0.283525	0.484772	0.629302	0.640193	0.0457606
1.08201	1.84146	0.770708	0.719996	1.41	0.625684	0.658621	1.47687	0.730862	0.810934	1.01873	0.586431	1.27792	1.06017	0.347772	1.10307	0.569657	-0.487679	1.76178	-0.193831	1.55858	1.03715	0.778001	0.763838	0.94256	0.878442	0.277817	1.48265	0.0605965	0.431166	1.47744	0.25561	0.865779	1.57875	0.190513	0.813319	0.819807	1.35163	1.04655	0.874415	1.50427	0.895632	0.818708	0.55699	0.196683	0.994609	0.927465	-0.429718	-0.53053	0.258284
2.44348	3.81556	3.59967	2.01557	4.93014	2.82806	2.54375	4.29129	1.98644	2.81249	3.84789	2.34811	4.04638	3.05559	2.25856	4.51712	1.17033	1.12769	4.17154	1.09264	2.4662	3.78058	1.89282	3.08995	3.80124	2.01319	3.49738	4.10971	0.959056	3.09378	3.57593	2.01878	2.66661	3.72462	1.90965	3.56409	3.86542	2.1046	3.90094	3.74968	2.4285	3.09005	3.7387	1.67739	1.31045	2.9191	3.32377	4.31178	4.30394	3.18419
1.0227	-0.0737872	0.193831	1.35682	0.573257	1.39984	1.15492	0.275087	0.484737	0.757901	0.634213	0.518573	-0.348492	0.59242	-0.0221224	0.0302372	0.790178	0.726332	-0.1772	-0.405503	0.0743117	-0.823772	0.587479	0.856524	0.674826	0.184572	0.208275	0.110092	1.00296	0.551668	-0.0770869	0.932742	0.748214	1.10623	0.555011	-0.0497704	-0.104505	0.618258	0.64591	-0.0551438	0.783134	0.516136	0.2693	0.424087	0.393679	0.645986	0.151367	0.00879669	0.134433	0.440908
-0.399772	-0.458305	-0.0832238	-0.0726328	0.808483	-0.349012	-0.396592	-0.167677	-0.167048	-0.470914	0.711767	0.0717878	0.434145	0.167997	-0.297411	0.260802	-0.676614	-0.867528	-0.792477	0.0694637	-0.36007	-0.312878	-0.225713	-0.196235	-0.214615	-0.200617	-0.307268	0.270803	-0.818377	-0.087039	-0.0853448	0.184786	-0.144028	0.338711	-0.500148	-0.271232	-0.799518	-0.334533	0.741716	0.718791	-0.115622	0.012085	0.0658493	-0.291324	-0.141554	0.345881	-0.257936	-0.749255	-0.863372	-0.448514
1.08024	2.76461	0.548812	1.66998	1.88236	1.57097	1.88272	2.39843	2.02732	2.69452	2.25536	1.74684	1.90854	1.74839	1.38821	2.35064	1.13981	1.0594	2.40887	0.760984	2.4128	3.85562	1.31263	2.10931	1.92615	2.01217	2.37939	1.83151	1.70249	1.81063	1.40951	2.14933	1.56235	3.65067	1.73339	2.61826	3.88207	1.4892	1.98885	3.42094	1.47	1.71133	1.65875	1.61129	1.95294	2.23915	2.77184	3.34082	2.49782	1.7047
-0.191651	1.11992	-2.00171	-0.745392	0.310552	-0.875296	-0.367585	0.483444	-1.08171	-0.249476	0.325675	0.331355	-0.309183	0.228218	0.00545311	0.227186	-0.470747	-1.10066	0.670711	-3.22812	0.254622	0.29882	-0.995778	0.0421972	0.453125	0.254283	0.524794	0.705161	-0.963391	0.56752	0.593795	0.247346	0.61304	0.685833	-0.825252	0.366125	-0.191144	-0.255013	0.517303	0.416371	0.0450077	-0.0228071	0.4354	-0.75698	-0.555999	0.366129	0.509568	0.623401	1.90946	0.571158
-1.54809	-2.32107	-3.37122	-2.43391	-2.80169	-1.30071	-1.80168	-1.96993	-1.86426	-2.21356	-2.88015	-1.3287	-3.58573	-1.82931	-1.91856	-2.72995	-2.08862	-2.62802	-2.50107	-2.37241	-1.90042	-1.73967	-2.48074	-1.71251	-1.95207	-1.8227	-4.00716	-2.07303	-1.65304	-1.88375	-3.37094	-2.56385	-2.02178	-1.61557	-2.19454	-2.0192	-2.48396	-3.29365	-1.73094	-2.2064	-1.34557	-1.60077	-1.96042	-2.70899	-2.95271	-2.40335	-2.07995	-3.26471	-1.78553	-1.89145
0.101096	0.0174794	0.391435	0.129608	0.691378	0.109302	0.178684	0.257847	-0.135337	0.205307	0.263299	-0.0708055	-0.622973	0.165664	-0.764688	0.27135	0.0305233	-0.0798659	0.83187	-0.732408	0.628455	1.34282	0.536105	0.355721	0.510451	0.368917	0.503417	0.709062	-0.118235	0.199367	1.13766	0.506187	0.763538	1.0393	-0.171677	-0.229423	0.644131	0.37454	0.348136	0.985125	0.461614	0.042202	0.0598459	-0.171706	-0.241632	-0.0363541	0.935622	0.803664	-0.440299	-0.266215
4.60436	5.64428	5.71075	4.57911	5.0887	4.24396	4.43479	5.23901	4.8094	4.25147	5.17584	5.20525	4.59256	4.84823	4.90405	5.46901	4.85627	4.3411	5.2086	3.61584	4.21321	5.02746	4.30758	4.71124	4.56486	5.23654	5.38171	4.10294	4.92462	5.07545	4.85747	5.01682	4.98984	4.76403	5.13697	4.76661	5.60028	4.38812	5.13457	5.46387	4.65141	5.14944	5.3277	3.92522	4.47652	5.06037	5.64357	5.60297	5.39559	5.0901
0.136964	-0.0201879	0.899479	0.0811377	1.84035	0.495131	-0.262934	1.55337	-2.74337	0.163859	1.71177	-0.407872	-0.814802	-1.16045	-1.0337	0.230166	-0.275403	-2.37833	-0.605803	-2.59383	0.179096	-0.151338	0.18862	0.262769	0.250198	-0.595631	-0.165198	0.571913	-0.607825	0.266698	-0.271971	-0.539882	-0.685296	0.808392	-0.305527	0.721072	-0.8431	0.273409	1.03827	0.744483	0.245055	-0.164194	0.455639	-0.454784	-0.260841	0.488149	1.05812	0.299298	1.38859	0.834142
-0.851178	-0.458633	0.507221	-0.330677	0.181857	-0.685122	-0.794283	-0.389975	-0.926901	-0.544826	-1.05047	-0.256403	-0.992481	-0.219479	0.00307369	-0.134767	-0.597945	-1.14144	0.324876	-0.894387	-0.503192	-0.440142	-0.316745	-0.391826	-0.74263	-0.431876	-0.391756	-0.302277	-0.888994	-0.268862	-0.764741	-0.544626	-0.415867	-0.144145	-0.319956	-0.671377	-0.473783	0.0699916	-0.170271	0.888282	0.0517912	-0.0785084	-0.342663	-0.364799	-0.298476	0.314448	0.303741	0.153859	-1.18853	-0.329348
-1.43441	-1.04305	-2.0368	-1.44405	-1.42378	-1.64467	-1.90247	-1.41291	-2.20156	-1.11238	-1.62628	-0.998298	-2.54005	-2.87252	-1.08818	-1.10409	-2.31723	-1.17085	-1.25126	-1.53001	-1.42023	-0.683867	-1.26847	-1.56976	-1.32841	-1.54778	-1.2445	-1.37372	-1.49945	-1.11254	-1.22881	-1.33609	-1.23306	-1.63427	-1.04276	-1.38397	-0.77413	-1.27578	-1.12711	-0.82642	-1.5557	-1.21593	-1.18927	-2.86032	-1.26979	-1.32123	-1.00673	-0.98741	-1.8171	-1.46652
-0.442468	-0.963467	-2.9256	-0.365342	-3.31897	-0.21244	-2.37578	-0.65397	-2.65577	-0.801659	-3.00809	-0.182262	-2.1967	-2.74167	-0.101485	-2.31332	-0.713973	-0.805678	-2.64791	-0.0488434	-2.67207	-2.20587	0.0377798	0.599491	-3.10048	-0.614615	-0.374305	-3.05748	-0.443415	-1.29768	-3.01552	-2.47667	-0.21794	-2.97029	-0.193211	-2.18823	-1.62896	-0.532887	-0.572391	-2.61226	-0.315815	-0.551414	-1.07893	-0.818775	-0.264331	-0.555138	-2.63481	-2.08548	-2.59392	-2.87047
1.73903	1.37595	1.42495	1.88991	1.66769	1.68382	1.97693	1.57252	1.8133	1.71672	1.54191	1.87345	1.28647	1.9237	1.11633	1.54999	1.68548	1.62563	1.96115	1.18962	1.37829	2.42976	1.5379	1.59727	1.51478	2.11278	1.9547	2.00197	1.74979	1.58556	0.906158	2.12804	1.58225	1.7914	1.6705	1.3627	1.83419	1.95272	1.89357	1.53463	1.73432	1.67041	1.63357	1.61558	1.41987	1.69029	1.60348	1.27774	0.992089	1.28905
2.41769	2.76165	2.66203	2.82565	2.7082	2.75961	2.92874	2.90215	2.68823	2.46732	2.83563	2.34599	2.38809	2.24502	1.75501	2.0759	2.35674	2.12859	2.19885	1.76699	2.06622	2.87612	2.59642	2.37554	2.32023	2.79375	2.66223	3.07531	2.38557	2.10179	2.02039	2.86795	2.5876	3.18501	2.8823	1.77208	2.99362	2.93279	2.53621	2.75596	2.64937	2.47296	2.51431	2.17753	2.18749	2.38734	2.73432	3.22782	1.43307	2.27717
6.17386	1.51605	4.27083	8.06751	6.94659	5.31786	5.34427	8.46142	9.55381	6.50837	8.53696	7.82961	8.97354	6.77259	5.97351	4.48988	6.75386	4.17361	5.26247	5.24826	4.9531	2.62254	5.27823	4.27023	3.16188	9.69408	9.5383	9.14678	4.45872	6.08162	4.06565	10.0834	4.00079	8.40013	5.5433	1.01341	1.88546	7.79806	6.99343	5.53558	4.64249	6.11281	7.8925	8.79808	6.51604	8.28583	7.86881	8.5421	5.88353	7.65662
4.31182	5.55129	6.0689	0.915133	2.4928	3.65357	4.14917	5.10388	2.60351	2.97496	4.21139	3.41635	3.31385	2.97977	3.31915	4.88415	3.45314	3.34274	3.46861	1.81534	2.87075	2.29645	3.48847	3.74362	4.11074	2.61942	3.44965	4.02653	3.39419	4.47448	3.07411	3.7112	3.74456	3.51021	4.1765	3.41158	3.65646	3.16256	4.22033	4.35033	2.42093	3.7374	4.30173	3.32193	3.7406	4.09228	2.93928	3.58016	3.77225	4.25795
-1.59462	-0.447936	-0.618309	-1.64866	-0.663246	-0.953808	-1.5009	-0.576139	-1.61562	-1.26123	-0.89101	-1.64481	-1.89187	-0.06498	-3.00957	-0.795477	-1.47213	-2.08774	-1.13123	-2.47376	-2.74532	-1.22222	-2.75185	-1.36213	-1.55281	-3.24136	-1.22866	-0.698898	-1.76217	-0.669649	-3.28314	-1.79821	-1.66695	-0.946909	-1.89324	-0.909525	-0.755567	-1.40909	-0.807197	-0.879756	-1.78239	-1.17273	-0.550697	-2.71649	-2.17225	-1.01121	-0.913979	-0.358647	-0.503576	-1.50424
1.53988	2.30287	1.06435	1.38195	2.17331	1.15995	1.55044	2.89028	0.85088	1.13605	1.6097	1.7431	1.0043	1.50587	1.6738	1.95991	1.04458	1.06913	2.35355	1.54173	2.03608	2.12811	1.32556	1.91059	1.89328	1.79358	2.17735	2.15802	1.18346	1.92231	1.6988	1.45793	1.76485	2.09712	1.37087	2.00454	2.3556	1.37917	2.02774	2.58209	1.60056	1.68288	2.19522	0.911888	1.00977	1.64556	2.28419	2.3325	2.73798	1.65766
-1.40374	-1.06503	-0.413447	-0.528962	-0.387975	-0.396303	-0.211693	-0.400257	-0.454602	1.06951	-0.474693	0.561147	-0.110441	-1.16644	-1.09227	0.0993948	-0.982615	-0.661006	-0.566537	-0.118686	-0.647015	-0.555718	0.108667	-0.786197	-0.612752	-0.969836	-0.646812	-1.43541	-0.872809	-0.596696	2.42387	-0.994251	0.237806	-1.29753	-0.918723	-0.525724	-0.804605	-0.373207	-0.449224	-0.47297	-0.399126	-0.74636	-0.837417	-0.530663	0.00722265	-0.662522	-0.493852	0.171129	-1.01828	-0.829006
5.87231	5.478	4.97928	5.68358	5.46565	5.77879	5.96254	5.64853	5.53241	5.32999	5.35888	5.46129	5.56176	5.48672	4.73101	5.21578	5.29459	5.50004	3.47697	4.75416	5.23779	4.49414	5.47775	5.53233	5.60529	5.85616	5.38976	5.84824	5.07077	5.55789	4.53247	5.90509	5.69165	5.61408	5.4059	4.05285	4.60375	5.89646	5.75282	4.75074	5.81279	5.81052	5.50862	5.3717	5.14621	5.67971	4.91142	4.7164	4.93741	5.42249
2.15016	2.61521	2.51189	1.90314	2.42606	2.14647	2.11843	2.46265	1.7416	2.01075	2.2963	1.96356	1.40319	2.32653	1.83665	2.43037	1.98126	1.92316	2.50929	1.67005	2.12811	2.27119	2.02449	2.31738	2.17275	2.29252	2.33453	2.46229	2.17465	2.41666	2.36176	2.15726	2.41593	2.53026	2.07925	1.86044	2.63272	2.04824	2.44307	2.50228	2.2919	2.34099	2.4455	1.86129	1.85533	2.21578	2.28766	2.38817	2.44312	2.09388
3.28987	3.73422	3.78777	3.1011	3.66374	3.3247	3.23398	3.7236	2.96441	3.26203	3.53094	3.16839	2.60525	3.53526	3.12335	3.54925	3.19311	3.03658	3.5124	2.90456	3.2744	3.43729	3.07353	3.26822	3.08592	3.58497	3.55326	3.71277	3.3978	3.45976	3.33363	3.41375	3.37151	3.99318	3.34489	3.57397	3.53424	3.27712	3.47697	3.4522	3.53993	3.4792	3.60014	3.04982	3.01279	3.48514	3.40994	3.24271	3.57574	3.2844
-0.160611	0.798696	0.648733	-0.233235	0.567372	-0.411459	-0.105611	0.408765	-0.310941	-0.206548	0.332717	-0.324284	-0.100468	-0.147494	-0.207082	0.59202	-0.161744	-0.118376	-0.0306597	-0.310657	-0.0778852	0.0787401	-0.134683	0.0128489	-0.0748863	0.0138998	0.131645	0.269223	-0.143066	0.046875	-0.313612	-0.0400229	-0.214448	0.1503	-0.161336	-0.0818892	0.240567	-0.220746	0.148537	0.901279	-0.356616	-0.0920305	0.193487	0.00642776	-0.0990996	-0.000368118	0.0650253	0.401813	-0.0638723	0.00956106
3.58241	4.08368	4.33716	3.47643	4.03828	3.48046	3.69937	4.3014	3.07897	3.19236	3.48372	3.52987	2.94946	3.47678	3.5673	4.07293	3.16549	3.31135	3.89646	3.27474	3.40495	3.73487	3.37803	3.49488	3.32588	3.66689	3.94427	3.69982	3.46728	3.87444	3.23593	3.48463	3.50315	4.28508	3.36044	3.48826	3.94644	3.53163	3.97125	4.34861	3.65323	3.92021	3.83267	3.21466	3.6644	3.94966	3.64449	3.48911	3.59857	3.68924
-0.152094	1.47925	0.544291	-0.362288	0.720294	-0.319112	-0.224319	0.521778	-0.244062	-0.162385	0.571793	0.0642185	-0.318721	0.00455618	-0.321054	0.660405	-2.80917	-2.03312	0.338089	-0.607127	0.589124	1.29466	-0.231486	0.166874	-0.133156	-0.037528	-0.0506687	0.123986	-0.726655	-0.450651	0.347973	-0.1318	-0.0509286	0.517558	-0.376893	-0.318996	1.4585	0.28758	-0.402037	1.95448	0.126978	-0.187718	-0.271569	-0.108151	-0.0237918	0.177771	0.665113	1.78244	-0.803675	-0.233034
3.55207	4.7276	4.55551	3.4102	4.27266	3.32894	3.65827	4.41816	3.35563	3.61091	3.46257	3.52805	3.43375	3.3112	3.58922	3.9211	3.37729	3.55475	4.17706	3.41069	3.5989	4.29086	3.567	3.81163	3.50086	3.8769	3.94442	4.07969	3.42625	3.78145	3.51478	3.58552	3.60996	3.8931	3.44552	3.53689	4.70745	3.68928	3.96424	4.74073	3.50138	3.81626	3.76855	3.23538	3.21928	3.80211	3.96954	4.41063	3.93496	3.56376
3.59808	4.20596	4.07495	3.50576	4.53997	3.6568	3.60914	4.70136	2.79102	2.79934	3.50017	3.62887	2.90775	3.44673	3.43684	4.28628	3.01514	3.16028	3.9152	2.96673	3.46251	3.87588	3.22414	3.64563	3.69105	3.47676	3.90365	3.80765	3.31167	3.90316	3.04654	3.34024	3.68607	4.23458	3.43845	3.66644	4.01481	3.42493	4.27545	4.72447	3.36249	4.14754	4.04502	3.02018	3.38152	4.00397	3.70979	3.70941	3.92285	3.75696
1.55347	0.631229	0.75945	1.15744	0.865647	1.48469	1.39245	0.574979	0.978757	1.03144	0.679946	0.95759	0.611358	1.02799	1.01115	0.0782576	1.15434	1.19266	0.256803	1.00554	0.923408	0.631615	1.28116	1.26733	1.10479	1.06016	1.04727	0.892731	1.28882	1.23908	0.489661	1.18887	1.18654	0.811893	1.08184	0.441525	0.361501	1.28256	1.11627	0.666719	1.31469	1.35048	1.11596	1.0964	1.1446	1.33843	0.67032	0.671082	0.647972	1.19795
-1.14195	0.77623	-0.443062	-0.920077	-0.647243	-1.05006	-1.29218	-0.874307	-1.0797	-0.451421	-0.832104	-1.00333	-2.30734	-2.42539	-0.519969	-0.298762	-2.71322	-1.13627	-0.846272	-1.14205	-0.613739	-0.733417	-1.23088	-1.40648	-3.08413	-1.44513	-0.801338	-0.710544	-3.11421	-0.599795	-3.02026	-0.96136	-0.840531	-0.594429	-1.12843	-3.08403	-0.504789	-2.40382	-0.731591	-0.783643	-0.688016	-0.776587	-0.66203	-2.44835	-0.950205	-1.17933	-0.991008	-0.488054	-1.46772	-3.08332
3.64669	3.25254	3.25922	3.41886	3.04001	3.52381	3.13566	3.27389	3.57735	3.30196	3.58989	3.75728	3.26764	3.55862	2.6113	2.55225	2.84015	2.38279	3.0052	2.7837	3.03787	3.3869	3.02031	3.09881	2.60621	4.52128	3.93087	4.26045	3.27186	3.36296	2.49854	4.72844	2.88619	3.55193	3.25819	1.98056	3.16137	3.81084	3.19958	3.22295	3.59256	3.3728	3.25865	3.75424	3.32068	4.36612	3.2363	3.95341	3.15664	3.10512
0.633327	1.2339	0.83581	0.59542	1.19101	0.679402	0.840393	1.51114	-0.323744	-0.252649	0.293493	0.655772	0.36955	0.737169	0.440019	1.14916	0.143688	0.0426278	0.871141	-0.239794	0.769866	1.16992	0.538868	0.778285	0.719426	0.545324	0.92041	1.06334	0.0945864	0.727224	0.447303	0.504644	0.922111	1.73013	0.30885	0.72135	0.814249	0.547466	1.35596	1.71832	0.708591	0.984861	1.0692	-0.0181751	0.0734277	0.805472	0.595635	0.618608	1.18951	0.947209
1.62546	2.53316	2.46441	1.78607	1.85334	1.52659	1.57702	2.19318	0.994433	1.01494	1.51725	1.41451	0.653015	1.3497	1.52531	2.07809	1.28214	1.7954	1.74827	1.25017	1.44249	1.58057	1.05878	1.71964	1.34678	1.23766	1.28625	1.67366	1.41009	1.6801	1.24821	0.911506	1.08632	2.35498	1.62283	2.09918	2.07108	1.29926	1.68569	1.69717	1.98835	1.74382	1.73845	1.59943	1.3299	1.77041	1.8831	1.66145	2.90289	2.00308
-1.90994	0.897361	-2.44074	-2.17804	-2.99614	-2.14318	-1.99382	-3.93091	-2.66578	-1.34005	-1.76511	-1.8912	-3.25939	-2.29173	-2.40969	-2.85955	-2.86782	-3.02569	-3.34349	-3.92326	-1.7524	0.114507	-2.17693	-1.47456	-0.190807	-3.46847	-1.89143	-1.84259	-2.27599	-1.89751	-2.42411	-3.04559	-2.30702	-0.175537	-1.24278	0.940883	0.0203037	-2.31848	-0.0963554	1.776	-1.18276	-1.48713	-2.41809	-2.00581	0.575236	0.276958	-0.77664	0.604712	-2.40615	-2.89799
-1.77319	-0.847716	-1.60211	-1.26149	-1.09382	-0.49534	-0.622546	-2.1179	-0.781073	-1.31792	-1.69316	-1.49228	-1.68536	-3.58559	-2.05367	-2.32225	-2.14806	-1.9094	-1.00588	-3.14674	-0.702919	-0.0848246	-1.9564	-1.46837	-1.85292	-2.00912	-1.94561	-2.15612	-1.4657	-1.01859	-0.616274	-1.53096	-1.4106	-1.56775	-1.96026	0.105763	-0.486712	-0.844671	-1.71967	0.445043	-1.71161	-1.23763	-2.57853	-1.36713	-0.830137	-1.806	-0.711026	-0.856647	-1.43944	-1.25799
-2.21136	-1.04512	-1.30893	-0.629391	-2.96558	-1.00906	-3.71974	-0.480807	-3.36157	-0.393887	-3.25319	-2.52464	-1.31013	-2.95902	-2.28627	-0.827496	-3.10185	-2.30576	-0.56688	-2.46081	-2.70595	-0.508497	-2.90732	-0.989872	-2.43194	-0.831059	-1.23993	-0.506342	-0.639933	-0.919108	-0.422585	-3.64734	-1.1693	-1.12031	-1.06788	-0.812434	-0.489904	-0.851541	-2.71452	-0.394885	-0.472285	-0.578792	-1.21221	-2.25286	-1.55926	-1.2752	-0.909278	-0.186441	0.493674	-1.93814
0.063199	-1.13749	-2.13193	-0.159467	-0.365055	-0.322056	-0.695236	-0.861237	0.610856	-0.0164638	0.214135	0.200419	0.162166	0.16908	0.0728827	-0.766497	0.457666	0.0165105	-3.55959	-0.216564	-0.755497	-0.923359	-0.62254	-1.18799	-0.962468	0.846685	0.523077	0.462339	-0.367234	-0.537031	-2.32422	1.08081	-1.13722	-0.554571	-0.32408	-2.25749	-1.76692	0.118884	-0.851021	-0.855044	-0.746684	-1.09637	-0.392378	0.37536	-0.143496	0.239463	-0.356799	-0.398095	-1.19476	0.166659
-0.995982	0.785535	-0.685998	-0.547358	-0.388635	-1.96226	-2.12107	-0.336208	-2.21749	-1.25264	-0.262125	-2.78612	-0.909753	-0.50774	-2.51661	-1.16108	-2.69538	-1.93213	-0.540236	-1.63354	-3.4303	0.152489	-0.51792	-2.07069	0.764915	-2.45169	-1.11784	-0.651848	-1.38808	0.395036	-1.00736	-1.19483	-0.793394	-0.523964	-3.09049	-3.28099	-1.14125	-0.761641	-1.00626	0.741164	-2.53838	-1.15615	-0.50418	-2.86864	-2.44975	-0.448389	-0.325948	0.691452	-3.16205	-1.09271
-3.19742	-1.85216	1.04579	-2.55638	0.562244	-0.627714	-3.00199	-0.895658	-3.06623	-3.49348	-0.0423727	-2.31742	0.205011	-2.87337	-2.41056	-0.93931	-3.23534	-2.73853	-0.192736	-1.99749	-3.23878	-3.19039	-2.4558	-0.637383	-2.57891	-3.88608	-2.42498	-0.950719	0.238303	0.211178	-3.57935	-3.26947	-0.373984	-0.620273	-0.692571	-2.96329	-1.95639	-0.764116	-0.142839	-0.755069	-2.73992	-0.515253	-3.26593	-2.80238	-2.56348	-0.256158	-3.56259	-1.13044	-2.43676	-1.43105
0.0927553	0.33722	0.474124	-0.217656	0.741774	0.0967417	0.363277	0.848415	-0.209265	-0.151694	0.49474	-0.531172	0.112128	-0.306067	-0.205947	0.45147	0.038805	0.0856719	-0.157922	-0.397591	-0.0458045	-0.177931	-0.0228033	0.0379648	0.137302	0.0981293	-0.0311985	0.519341	0.276596	0.512625	-0.215374	0.258671	0.309901	0.115313	0.11323	-0.479228	-0.0760021	0.135547	0.396514	0.298121	-0.178416	0.616081	0.899168	-0.340187	-0.399834	0.0693913	-0.0502205	0.350176	-0.0496464	0.105702
0.567952	1.45322	1.12224	0.581294	1.49932	0.746193	1.04328	1.49582	0.129824	0.625286	0.893446	0.478335	0.109316	0.18926	0.453479	0.881259	0.392642	0.648392	0.820566	0.417852	0.725283	0.95998	0.561897	0.933809	0.884528	0.538653	0.935845	1.10256	0.481257	1.14746	0.496737	0.702836	1.1277	1.25643	0.513346	0.0761442	1.03015	0.430442	1.30007	1.34777	0.739138	1.48939	1.73175	0.345728	0.574128	1.00718	0.571215	0.824044	1.23902	0.816357
-0.905118	-1.93596	-3.42404	-1.89031	-3.14548	-1.5912	-0.828317	-1.65151	-1.57815	-2.82139	-2.57109	-1.49163	-2.64063	-1.65883	-1.41984	-2.77311	-1.81063	-1.04732	-1.89483	-2.59408	-0.865081	-3.38992	-1.97912	-1.62672	-1.75097	-1.31049	-1.38142	-1.43342	-0.980969	-1.19513	-2.99186	-1.07043	-2.13104	-1.63429	-1.29027	-2.8879	-1.21198	-0.617273	-1.6108	-3.19871	-1.08114	-1.47779	-1.77123	-2.78365	-1.53987	-1.2393	-1.46204	-1.1849	-1.41235	-1.75173
2.42911	2.07735	2.89813	2.73066	3.29492	2.75042	2.85915	2.78477	2.47325	2.72585	2.45961	3.24393	2.38669	2.54923	2.3849	2.61823	2.47284	2.33296	2.45793	1.88017	2.19192	2.50631	2.6846	2.77496	2.64179	3.06292	3.47332	3.14132	2.4671	2.49974	1.89384	2.7456	2.86641	3.75293	2.87841	2.2387	3.54232	2.81586	3.23153	3.5335	2.95633	2.90615	2.6637	2.7677	2.87733	3.03623	2.96753	3.01196	1.49754	2.2677
-0.128697	-0.740073	-0.0832934	-0.286081	-0.6153	-0.116016	0.131779	-0.783512	-0.012393	-0.404435	-0.832835	-0.368048	-2.6233	-0.3813	-0.474451	-1.05321	-0.0658875	-0.150167	-0.260272	-0.547148	-0.260489	-0.628236	-0.25204	-0.159974	-0.160397	-0.0885334	-0.286217	-0.294876	-0.312166	-0.199364	-2.43352	-0.141227	-0.0636039	-0.594922	-0.0841889	-0.74472	-0.496343	-0.119391	0.216606	-0.484644	-0.0593033	-0.213426	-0.446786	-0.565003	-0.596986	-0.587101	-0.585513	-2.20514	-0.905991	-0.568922
1.5826	0.021111	2.87865	3.30349	1.54442	3.20164	3.77771	1.1209	1.90196	2.1406	1.74927	2.48421	1.44488	1.04452	-0.474423	-0.461372	2.44853	1.9339	1.32806	0.392817	1.77061	3.70506	2.90231	2.40026	2.45412	2.07756	2.81993	1.8253	2.19294	1.34058	2.11702	1.27112	2.01725	1.44401	0.962245	0.495186	0.116795	2.56609	1.55912	1.82778	2.11679	1.02512	0.810863	2.74608	2.17644	1.78703	1.20716	0.354958	1.17154	0.729409
-1.20418	-2.51736	-1.81891	-1.45393	-3.94897	-1.73396	-1.56639	-2.03698	-1.68467	-1.61961	-1.73177	-1.26764	-1.29984	-1.44972	-2.57748	-1.74221	-1.34706	-1.84511	-1.89937	-3.57086	-2.6761	-3.49995	-1.54068	-2.56758	-1.48187	-1.7047	-3.33285	-1.9956	-1.4109	-1.7591	-2.67859	-1.34042	-2.34359	-2.33502	-1.50441	-3.11304	-2.83472	-1.80536	-2.27219	-2.43995	-1.63248	-1.86653	-2.07017	-2.44075	-1.37491	-1.82236	-1.95562	-2.80612	-2.19195	-1.93344
2.48223	3.21276	4.81146	2.69707	3.48335	2.26972	2.97053	3.59491	2.149	2.66819	1.98479	3.26743	2.45136	1.75542	1.21644	0.890299	3.27461	3.15491	2.85265	1.36216	3.45882	4.83786	3.32261	2.98847	2.87854	2.8954	3.19696	2.98053	2.94845	2.49563	3.21681	2.07647	3.18292	2.78823	0.859341	2.12083	5.2907	3.00947	2.41113	4.96232	3.01213	2.88482	2.71432	2.96312	1.41484	1.89755	2.8864	3.45125	2.7631	2.56671
-1.08599	-0.0955005	2.748	-0.86265	1.14355	-0.752316	-0.487512	0.545796	-0.649299	-0.163473	0.160728	-0.479795	0.859479	-0.279095	-0.222136	1.46241	-1.087	-0.745149	-0.275662	-0.703245	-0.579812	-0.257797	-0.94412	-0.541333	0.40541	-2.83563	-0.972221	0.267967	-0.822598	-0.806492	-0.665301	-0.72954	-0.817491	-0.220821	-0.943113	-0.619671	-1.44197	-0.546806	0.749804	-0.488577	-1.04028	-0.717412	-0.634549	-0.820292	-0.800994	-0.361525	-0.658504	-0.786554	-0.934793	-0.246613
0.943103	2.64905	4.01972	1.14563	4.00352	1.26445	2.31659	3.91762	1.55679	2.07063	3.49547	0.982231	1.72355	0.34524	1.17404	4.31413	1.03961	0.913154	1.37386	-0.353545	1.42976	1.19303	1.01878	1.37915	2.18583	0.924685	2.03804	2.87007	0.474434	2.54613	1.52848	1.53566	2.37966	3.90838	0.601902	0.675638	0.910125	1.37771	3.20057	2.95376	1.47713	3.41412	3.43048	1.4065	2.09529	2.34988	2.06418	2.55303	1.35187	1.9688
-0.637478	-2.70182	2.30631	-1.65226	-0.195826	-1.35011	-0.499727	-0.224591	-3.02296	-1.86491	-0.768104	-1.47208	-1.70323	-1.78947	-2.00445	-0.0436163	-1.07425	-2.34833	-2.08599	-1.99558	-0.215472	-2.42634	-1.3205	-1.65506	-0.66474	-3.07011	-1.89433	-0.721822	-2.02595	-1.19701	-1.85769	-2.44556	-1.52774	0.0612564	-2.40618	-1.33428	-2.11931	-1.3612	-1.07159	-0.925069	-1.55251	-0.647191	-1.39272	-2.65618	-3.6185	-2.32275	-1.11236	-2.11406	-2.01606	-0.816205
0.879997	2.07767	1.01397	0.707148	1.86103	0.801908	1.04498	2.03507	0.482066	0.457385	1.13086	0.934354	0.853653	0.849484	0.903267	1.90269	0.553704	0.752485	1.35095	0.696553	1.00406	1.4893	0.729581	1.27694	1.18312	1.15168	1.42367	1.4677	0.854812	1.28741	1.02001	1.0562	1.20533	1.76022	1.10052	1.76967	1.95442	0.917359	1.61006	1.92079	1.21868	1.47609	1.47481	0.62425	0.801472	1.32037	1.4579	1.82554	1.68994	1.34442
0.321782	-3.12217	-1.56288	4.05797	-0.107079	4.34937	3.37155	0.979798	4.73115	3.63112	4.21268	5.40164	3.70551	2.79546	3.09573	-2.35828	4.18616	2.8098	-4.17032	2.47254	3.39279	-2.42673	1.77744	2.19431	2.02976	3.48872	3.62429	2.43364	-1.99573	0.574789	2.02961	2.478	2.31431	2.47587	1.9964	-2.96077	-2.48769	2.45705	3.08881	-1.13658	3.14196	0.451229	1.36341	4.21069	2.38657	1.02107	3.46769	0.928675	2.27218	0.978605
0.749949	2.36037	5.71106	1.08571	3.84305	1.1405	1.58457	2.92337	1.39123	1.9897	3.55659	1.73476	3.58416	2.1575	2.32914	3.64288	1.06158	1.12997	1.81142	1.65525	1.98716	1.89042	1.21581	1.58045	1.87775	0.836836	2.39932	2.58766	1.84508	2.55382	0.939856	1.17642	1.47955	3.10952	1.85721	1.63635	0.784649	1.48692	2.75018	2.39333	1.5317	2.01929	2.89613	1.30546	2.0339	1.68613	1.71666	1.51714	0.707632	2.47475
1.03037	1.04675	0.716363	0.486405	0.883131	0.75602	0.869913	0.923134	0.527142	1.01355	0.832207	0.709788	0.176447	0.543629	0.971488	1.10166	0.54219	0.626718	1.15042	0.928905	0.896468	1.04898	0.680264	0.803146	0.697934	0.776442	0.68026	0.803967	0.889612	1.14764	1.04713	0.53084	0.765967	0.764267	0.804812	1.0241	1.30231	0.751707	0.7895	0.965308	0.525483	0.728625	0.697481	0.507313	0.838186	0.947652	0.863522	1.10754	0.884915	1.09491
2.44076	3.20877	3.06398	2.3891	2.58931	2.21227	2.55386	2.72622	2.07792	2.29611	2.30576	2.37024	1.78764	2.5543	2.25254	2.74285	1.98949	1.95436	2.84573	2.02865	2.37274	2.80747	1.99586	2.33194	1.95906	2.86207	2.89606	2.89252	2.23995	2.55372	2.45598	2.68078	2.36024	2.93474	2.42446	2.04476	2.81591	2.59384	2.4589	2.79423	2.39237	2.47341	2.37742	2.26607	2.44516	2.98028	2.58913	2.75413	2.85425	2.46535
0.78124	4.39489	3.91425	1.99293	4.64425	1.11937	3.21002	4.97142	0.526212	1.76757	2.81111	0.912332	0.824791	0.757555	1.3687	3.12491	0.150503	1.48746	1.71829	0.143951	1.55973	2.19672	0.767316	2.26712	1.76198	0.856554	2.49	3.51271	1.13621	3.28693	2.64828	0.992758	3.32387	3.04699	1.48597	1.42185	1.51405	0.586917	3.67681	3.7365	1.09612	4.1045	4.38789	1.37292	2.03998	2.48966	1.36549	1.53919	4.28842	3.51877
-0.400195	1.79223	1.34727	-0.505497	1.94395	-0.400009	1.20066	2.46044	-0.389409	0.652692	1.30748	-0.526913	-0.0162039	-0.594262	0.224083	1.33607	-1.22277	0.5757	0.829831	-0.682179	0.961709	0.634612	0.193925	1.1486	0.956756	-0.840199	0.0133858	0.838924	-0.416535	1.54034	0.670078	-0.0415974	1.50464	0.73997	-0.161899	-0.443433	0.468208	-0.773015	1.85054	1.72735	-0.0141068	2.23244	2.52803	-0.0523195	0.429925	0.461163	0.0349798	-0.0349617	-0.164202	1.02133
-0.422618	-1.48863	-2.86037	-0.764864	-1.51512	-0.397989	-0.654149	-1.99632	-0.890877	-0.942788	-1.33025	-0.738989	-1.75345	-1.97925	-0.825639	-2.30585	-0.854435	-0.5456	-1.83489	-0.270763	-1.3388	-1.59237	-1.00202	-1.03826	-0.891438	-1.01134	-0.925418	-1.16992	-0.29886	-0.621162	-1.60688	-0.678215	-0.900359	-1.63657	-0.663281	-3.14308	-1.49251	-0.794818	-0.898775	-1.55917	-0.786706	-0.648196	-1.14217	-1.02363	-0.608747	-1.0452	-1.38007	-1.18058	-1.9279	-1.01754
2.41848	2.56517	2.27775	2.14953	2.57942	2.46828	2.57046	2.60567	2.26043	2.67382	2.68921	2.42017	2.05171	2.43534	2.16394	2.57002	2.30853	2.24608	2.64027	1.8902	2.34577	2.38738	2.66699	2.49455	2.43905	2.49373	2.58497	2.7108	2.29466	2.57282	2.82378	2.69368	2.69697	2.95349	2.40537	2.22303	2.7299	2.39671	2.73894	2.61058	2.37219	2.69971	2.84481	2.20412	2.31998	2.43018	2.50654	2.41055	2.57123	2.59607
8.10246	6.53374	6.32499	8.05317	7.54544	7.84211	7.90478	7.36347	7.5776	7.95322	8.04139	8.05941	7.68306	8.09965	8.18384	7.60933	7.90749	8.17504	7.49616	7.62935	7.88251	7.3702	7.77608	7.67558	7.38123	7.8424	7.6304	7.49685	8.10385	8.10027	6.80198	7.53545	7.60304	7.33955	8.41208	6.82995	7.31699	8.14015	8.20247	7.65273	8.00179	8.03316	8.02899	8.03562	8.35879	8.50789	7.67053	6.95948	7.92933	7.89465
3.70567	3.61552	2.86111	3.5689	4.34417	3.58083	3.46448	4.09607	2.85151	3.43032	4.37853	3.34624	2.86047	3.44394	3.21778	3.9082	3.17889	3.38279	4.30853	3.11398	3.48295	4.03151	3.29356	3.5161	3.41741	2.60238	3.24769	3.82908	3.58355	3.93359	3.35655	2.4678	3.12584	3.67663	3.97566	3.81652	4.11938	3.47439	3.9929	3.95785	3.60476	3.66625	4.10067	3.43447	3.71414	4.2362	3.81334	3.72069	4.74201	3.41204
-1.65232	-0.84158	2.21888	-3.47345	0.283298	-1.28965	-1.03018	-0.108328	-1.39336	-0.545589	-0.24194	-2.12735	-1.10684	-2.76091	-0.380727	0.872632	-1.77453	-1.82417	-2.55144	-2.95197	-0.824826	-2.48884	-1.75535	-1.29123	-1.2824	-2.27973	-1.86238	-0.953931	-1.43318	-0.396085	-3.02423	-3.25175	0.105628	-0.680408	-1.1851	-1.12944	-2.95471	-1.03257	-1.22589	-0.912115	-1.06974	-1.10331	-1.51651	-3.32982	-3.57283	-2.62152	-1.37835	0.39244	-1.23568	-0.836648
7.85128	2.0438	0.591325	8.72721	6.37628	8.67423	8.47429	6.35131	8.15068	8.45016	6.59741	7.4921	6.68167	6.02552	5.83344	1.00385	8.20324	7.81915	3.81053	8.8603	8.45055	5.09117	8.33527	8.13859	7.51627	7.19415	6.97947	6.37119	7.61195	5.83576	3.43078	7.25488	6.45204	5.28778	7.25456	1.1547	3.16961	8.30734	6.12275	3.63246	8.3943	6.41205	5.6608	8.47617	8.00505	6.7461	7.41089	4.35984	6.10935	5.83378
-3.01535	-1.8053	-0.420017	-1.92782	-0.564742	-1.76604	-1.74547	-0.759156	-3.04068	-1.74666	-0.93041	-1.63482	-1.12021	-1.18051	-1.66181	-0.620905	-3.49135	-2.43356	-1.46295	-2.24042	-1.94807	-1.56072	-1.54873	-1.8192	-1.62504	-1.85913	-1.75836	-1.06584	-2.99549	-1.57164	-1.99294	-1.7591	-1.46708	-0.700359	-1.84919	-1.51297	-0.980103	-1.91208	-1.46216	-1.29643	-1.76064	-1.4208	-1.37688	-1.9388	-1.82358	-1.60309	-1.51236	-1.4032	-1.99661	-1.28474
3.112	2.68934	0.921206	3.36944	2.17619	3.75908	3.27372	2.52703	2.87905	3.53744	2.47909	3.26007	2.70698	1.94178	2.80679	2.38461	3.60521	3.483	3.08961	3.76871	3.23403	3.09411	3.3948	3.35799	3.0133	2.55007	2.56651	2.40641	3.44913	2.53163	1.88281	2.36747	2.02741	1.66225	2.67404	0.759281	2.47408	2.9808	1.89262	2.08069	3.44448	2.29557	2.10763	3.88493	4.01426	2.54467	2.96149	3.06897	1.76578	2.21591
0.0764017	0.0100999	0.723163	0.735739	1.74136	1.07148	1.6333	1.25583	-2.11536	2.39207	1.18911	1.90114	1.86049	1.31828	1.82394	1.84809	-0.0916586	-0.115551	0.835061	0.764557	1.70031	1.74494	1.66041	0.851757	1.34475	-0.127999	0.741714	1.0855	0.60482	0.94111	2.88822	0.0201502	1.37936	1.98133	1.07908	1.7816	1.41607	0.667507	1.61676	1.88364	1.16808	2.24181	1.80218	0.435059	1.16461	1.34545	1.30605	1.73735	0.329874	0.317006
2.26337	0.762576	0.0580058	3.37591	2.76767	4.20343	4.19479	2.4088	3.35568	3.15049	2.68024	2.56369	2.19817	2.46316	1.51775	1.99091	2.84572	2.71157	1.73291	2.8992	2.57867	2.73466	2.88135	2.56278	2.6389	3.2702	3.03787	3.09362	3.01541	2.61812	1.15304	3.27845	2.63506	3.45061	3.29437	2.10129	2.23033	3.57982	2.58014	1.8305	2.67643	2.67093	2.59993	3.27415	3.11862	3.21934	1.8034	2.1876	1.90418	2.35762
1.74535	2.36825	3.01153	1.64485	2.6085	1.72023	1.90521	2.71567	1.85634	1.81358	2.26498	1.70411	1.85608	1.86504	1.79844	3.02563	1.67151	1.6739	2.04938	1.52017	2.15536	1.74637	1.73939	1.834	1.90658	1.99805	2.01869	2.32067	1.77684	2.20799	1.83749	2.22343	2.16462	2.44279	1.95937	2.11641	2.02114	1.97271	2.27044	2.35761	1.43554	1.99772	2.1146	1.40115	1.69522	1.86315	2.28982	2.34842	1.7284	2.01265
-0.528163	-0.0506053	0.536287	-0.935783	-0.169733	-0.445924	-0.396529	0.09168	-0.681604	-0.664696	-0.551227	-0.851483	-0.984822	-0.735315	-1.30246	0.305907	-1.14321	-1.03265	-0.502481	-1.15971	-0.528367	-0.553118	-0.652374	-0.444437	-0.512352	-0.740695	-0.616538	-0.0757704	-0.67656	-0.436956	-0.892378	-0.522989	-0.486447	0.0657434	-0.578712	-0.216464	-0.314414	-0.739628	-0.264724	-0.246066	-0.505587	-0.369697	-0.288522	-1.06391	-0.781034	-0.669556	-0.279122	-0.238485	-0.186329	-0.612308
2.25279	1.13718	0.429619	2.48091	1.01984	2.59459	2.49778	0.928868	2.00093	2.32013	2.01765	2.45853	1.38667	2.18311	1.83692	-0.521361	2.54128	2.67783	-0.79769	2.14329	1.57471	1.75226	2.55636	2.62459	2.19416	2.39348	2.0804	1.9879	1.92304	1.68538	1.09788	2.15404	1.99301	1.53889	1.39065	1.93884	-2.72275	2.36104	2.07046	0.132862	2.93774	2.2532	1.67368	2.64257	2.50451	2.19476	1.33628	0.6542	1.49001	2.36984
-3.26304	-1.69237	1.53387	-3.64339	-0.514664	-2.91155	-3.23707	-0.175244	-1.8291	-3.60305	-1.43947	-2.38577	-0.356049	-2.66675	-2.92329	0.041831	-2.24027	-1.81107	-1.79997	-2.69783	-1.6053	-3.33976	-2.18483	-3.49447	-0.521224	-1.91669	-2.30571	-0.0825243	-2.1865	-3.19163	-2.52948	-1.87658	-1.80236	-3.32597	-2.8324	-2.25185	-3.36465	-2.34373	-0.68488	-1.75707	-3.43077	-2.64312	-0.988505	-2.75243	-2.87641	-2.84002	-1.3567	-2.60045	-2.32737	-1.4715
3.75398	2.34896	1.54347	3.40137	2.8628	2.74466	3.05062	1.31776	3.11514	3.39636	2.47219	3.40299	1.61594	3.02928	2.05478	0.0771713	3.41172	3.41764	-0.584435	2.71922	2.71776	0.862352	3.56575	3.44578	3.31287	3.34671	3.51691	2.15943	3.35378	3.25895	0.596042	3.44787	3.88535	2.32405	3.0355	-0.0507383	1.79244	3.70596	3.76179	2.14797	3.45829	4.41821	3.95258	3.70853	3.48237	3.90552	1.86796	2.55842	2.43576	3.16839
-2.22987	-0.769496	0.671291	-2.70519	-0.623892	-2.08797	-2.19913	-0.473068	-2.65987	-2.56718	-2.4142	-2.92383	-2.46317	-3.09949	-2.60894	0.618136	-2.9379	-3.0378	-0.347	-1.72776	-0.942095	-0.997682	-2.27645	-2.35384	-1.09426	-3.22174	-2.48738	-0.998616	-2.7647	-1.3716	-2.84532	-1.7022	-0.985687	-1.32922	-1.76214	-0.76282	-0.97192	-2.41755	-1.46563	-1.04529	-2.78027	-1.1088	-2.24969	-2.05237	-2.4528	-1.20134	-1.04305	-1.47027	-1.10561	-3.05514
2.10098	3.5137	3.76702	2.04621	2.46498	2.23287	1.95225	2.93083	1.99645	2.41334	1.79251	1.88552	1.35804	2.18045	1.64196	2.61681	1.83503	2.00244	2.30554	1.87316	2.10814	2.4994	2.14496	2.4682	2.03141	2.38917	2.22204	2.44677	1.91725	2.21267	2.59926	2.46648	2.28676	2.45679	2.20526	4.01814	2.60838	2.1798	2.40609	2.82823	2.33734	2.40829	2.33278	1.82298	1.9628	2.18987	2.33717	2.42906	3.36599	2.71075
1.59288	1.55909	3.17145	2.45472	1.86533	1.86182	1.58153	0.840418	2.24577	2.09416	1.86321	1.48304	1.42827	2.21526	0.969999	0.655385	1.80552	1.98568	0.00291157	0.902904	1.4844	0.477305	1.62264	1.58877	1.3626	2.55599	2.01318	2.02918	1.50497	1.27144	0.713644	2.54081	1.44189	2.45485	2.04224	0.862632	0.195859	2.70261	1.44108	0.324749	1.32196	0.991323	1.21313	1.82617	1.26901	2.38704	1.95454	1.31862	3.30645	2.58066
-0.75922	-0.74437	-3.2716	-2.70042	-3.74987	-3.13589	-0.999207	-0.816844	-0.701473	-0.767848	0.358799	-0.886954	-2.59364	-2.51555	-1.51827	-3.23749	-1.89569	-0.879854	-2.68639	-1.8578	-0.383469	-0.998508	-0.793098	-0.69615	-0.561177	-2.83794	-0.918198	-0.87193	-0.571359	-1.00442	-2.73445	-2.6725	-0.945607	-0.849845	-0.248244	-1.27067	-2.59311	-0.1734	-0.730357	-0.722372	-1.42857	-0.382836	-1.31131	-2.02837	-0.978461	-0.187709	-0.951888	-0.520211	-2.62001	-0.399341
-0.522202	-1.09149	-2.10282	-0.420384	-0.627869	-0.506247	-0.884202	-1.39654	-0.989958	-0.663549	-0.967567	-1.15445	-2.28669	-0.912764	-2.08214	-1.69903	-0.881901	-1.00872	-2.25228	-0.974224	-1.20019	-0.915971	-0.646002	-0.855582	-1.12874	-0.727189	-1.14012	-0.789912	-0.514482	-0.925921	-2.49405	-0.846598	-0.754426	-0.737325	-0.592018	0.300541	-1.5965	-0.959625	-1.00909	-1.23485	-0.752155	-0.568204	-0.835424	-1.0765	-1.70356	-0.81692	-1.48552	-1.08915	-0.924433	-0.604764
8.02197	5.20972	4.61634	8.2019	6.49965	8.44728	8.43402	5.2495	6.41321	7.78744	5.38872	7.20034	3.2238	5.85351	7.01165	4.74285	8.03509	7.88725	3.25832	7.38997	7.82994	3.6431	8.09763	7.7281	8.2796	6.69166	7.14228	5.44762	8.05612	7.85486	5.51005	6.34445	8.40515	6.27078	8.00111	4.07009	2.2241	8.07834	8.63081	7.11927	7.78041	8.54538	8.22789	7.03063	7.56219	7.42668	7.35249	6.02227	6.19995	6.68009
-0.229554	-1.09371	-1.51397	0.11569	-1.28095	0.106962	-0.707093	-1.18004	-0.243991	-0.614279	-1.46937	-0.669023	-0.14054	-0.929935	-0.62836	-0.974597	-0.075861	0.000545979	-0.416209	0.430686	-0.670764	-1.34075	-0.347434	-0.852512	-0.942071	-0.404695	-1.01876	-1.06301	-0.454161	-1.47316	-3.35818	-1.3779	-1.24042	-1.78265	-0.933968	-2.59822	-1.34777	-0.759868	-1.64953	-1.47785	-0.431649	-1.19608	-1.13981	-0.214778	-0.855762	-1.46533	-1.15507	-1.60812	-0.656074	-1.24964
1.21466	1.76539	2.14498	1.06817	1.65842	1.15936	1.62969	2.10493	1.04925	1.45254	1.42468	1.49132	1.24252	1.18952	1.29121	2.05967	1.08409	1.16762	1.64549	0.828675	1.34347	1.62183	1.37478	1.67798	1.56277	1.63882	1.82462	1.92598	1.26299	1.5741	1.43303	1.65719	1.69516	2.69839	1.23288	2.07489	2.35194	1.57633	1.91281	1.94497	1.5022	1.71494	1.78988	1.07117	1.16667	1.41745	1.82968	1.94092	2.39346	1.84035
5.05508	0.544063	0.218831	4.48716	3.5555	4.62416	4.74889	2.69375	4.56968	4.82336	4.22846	4.39826	3.89457	3.92018	3.91181	-0.233059	4.3519	3.71336	2.15021	4.58338	5.14379	4.71556	4.53364	4.43064	4.29979	4.12647	4.06486	3.86937	4.29239	3.74059	2.01827	4.88257	4.1505	4.32348	3.94779	-0.214682	1.43527	5.33629	3.95549	0.894511	4.84929	4.46605	4.00356	4.84974	4.85129	4.45965	3.80311	2.29491	3.34184	3.86408
0.773994	1.71766	1.95773	0.448906	0.885108	0.616463	0.855058	1.56442	0.234677	0.964534	0.625976	0.702967	0.328233	0.976377	0.849367	1.24074	0.8304	0.581364	1.03953	0.621334	0.722736	1.1716	1.07347	0.965573	0.688918	1.04114	1.09949	1.20593	1.0182	0.993752	1.48981	0.825973	1.06838	1.64479	0.862368	1.81854	2.18558	0.698452	0.843344	1.09248	0.78074	0.966454	0.915145	0.635917	0.635517	0.91209	0.948277	1.16287	1.49328	1.05576
1.58285	4.54706	2.12712	1.74562	2.43721	1.59387	2.31347	3.14637	1.02768	1.48216	1.76741	1.42075	0.830323	2.08103	0.827559	2.04753	1.07952	1.06248	2.26602	0.536638	1.72612	2.56657	1.51838	2.00907	1.77011	2.44129	2.5057	2.77264	1.25632	1.82981	2.51627	2.28565	2.37308	3.89821	1.29973	2.72415	2.68256	1.98642	2.38068	3.16696	1.87925	2.19886	2.13839	1.12284	0.708622	1.87964	2.12536	2.96248	2.98299	1.79098
-1.20259	-1.04658	-0.861913	-0.883599	-0.327318	-1.0918	-0.892961	-0.735528	-0.672714	-0.785182	-0.391191	-0.610205	-0.350862	-0.776021	-0.578011	-0.279733	-1.10493	-1.16418	-0.294891	-2.44328	-0.863552	-0.712764	-1.23696	-0.885115	-0.820796	-0.309201	-0.385958	-0.321054	-1.24264	-0.755285	-0.504206	-0.353818	-0.841741	-0.484894	-1.15925	-0.835142	-0.759976	-0.878053	-0.517391	-0.825697	-1.03361	-0.837104	-0.549922	-0.849239	-1.07255	-0.582564	-0.690344	-0.771914	-0.956677	-0.649891
-0.780272	-4.04284	-0.703886	-1.73593	-2.05891	-0.89652	-1.47672	-2.60004	-1.38616	-1.77312	-2.74658	-0.92919	-1.13685	-2.97665	-2.21279	-1.83672	-2.71779	-1.53574	-1.93223	-1.69198	-2.31853	-3.73384	-0.355141	-1.75668	-1.6873	-1.34732	-1.63165	-2.23471	-1.9181	-3.02957	-2.01105	-1.35423	-2.26657	-3.22222	-1.79184	-3.18196	-2.086	-3.4151	-1.89648	-3.5127	-0.223012	-2.1862	-3.46935	-0.205395	-1.00781	-2.00078	-2.58234	-2.9888	-2.89721	-2.37651
1.28954	-0.233286	-0.792456	2.14338	1.58127	2.05286	2.10713	1.04615	1.07017	1.06447	0.870424	1.40211	0.196485	-0.0615802	-0.044508	-1.47346	2.26022	2.15558	-2.62009	0.757319	1.12467	-1.23939	0.843781	0.853079	1.19034	3.54556	3.22718	3.67583	1.58678	0.781968	-3.35901	3.08131	2.36112	2.42566	1.26547	-0.717692	-2.77188	2.74438	2.20827	1.98693	2.78436	2.62854	2.71636	1.65024	1.59723	2.00381	1.06486	0.877185	-0.0392513	0.571072
2.72528	-0.0335412	0.764433	1.81973	1.622	2.37739	2.01196	0.959209	2.18266	2.0742	1.04234	2.49599	1.6059	1.60134	2.09205	0.593058	2.11559	2.12227	1.46048	1.99184	1.92257	1.80293	1.9929	1.79979	1.65915	3.28637	2.9079	2.14916	2.18351	1.47979	1.2819	3.01326	1.46646	1.5793	1.56193	0.882605	0.499816	1.94189	1.3521	0.351975	2.3815	2.27839	1.95254	2.66546	2.48283	2.66109	1.12278	0.498248	0.717679	1.72746
5.1638	5.54968	4.23091	5.17373	5.78946	5.34954	5.30245	6.06127	4.38009	4.69802	4.56759	5.1048	4.00616	4.7388	4.71352	5.54505	4.66707	4.79979	5.21074	4.58144	5.22775	5.38968	4.92217	5.30571	5.00988	5.01523	5.3405	5.59743	5.10942	5.31174	4.19017	4.85859	5.33464	5.32015	5.14276	4.71727	5.90614	4.93293	5.73687	6.30535	5.18357	5.49756	5.49328	4.77895	5.09419	5.45775	5.24247	5.37115	5.00231	5.10236
-1.24941	2.36054	2.28044	-0.830844	-0.265331	-0.876958	0.701841	-1.02653	1.39923	2.51964	1.50758	-2.60035	-1.24328	-2.5088	-1.29454	-1.11942	-1.2752	1.18113	-0.825675	-1.45086	-0.998366	-0.851287	-0.899108	-1.53943	-0.779729	-3.23538	-1.82589	-1.05239	-0.469385	-0.426009	-0.256044	-1.42375	-0.6168	3.74774	0.172388	-0.810506	-0.2501	-0.785046	-0.177277	-0.53368	-0.922169	0.650485	-0.520775	-3.69017	-1.39999	-3.64249	-0.84783	-0.806063	1.38627	2.56517
-0.711493	-3.03551	-3.06426	1.27773	-2.38269	0.908246	0.427682	-2.44438	-0.864954	-0.885361	-3.52166	-0.415449	-1.33301	-0.415046	-3.05343	-2.28703	-1.15555	-1.34528	-1.499	-0.00701427	-0.968633	-2.37371	0.0248804	-0.0707626	-0.822383	-1.33005	-1.81965	-1.54261	1.40412	-0.836114	-1.84954	-2.1091	-1.56405	-2.30094	1.38602	-2.25122	-1.61537	-0.196846	-1.05213	-2.70832	-0.571949	-1.89103	-1.66241	-0.708449	-1.04534	-0.979561	-1.98792	-3.03151	-1.90042	-2.07492
0.953932	2.05139	2.29669	0.861875	1.99908	0.816757	1.04716	1.96693	0.621693	1.10591	1.43021	1.05073	0.806473	1.04444	1.08158	2.71826	0.698369	0.74625	1.32647	0.565061	1.16336	1.00146	0.730061	1.05827	1.00776	1.12984	1.31688	1.77463	1.03312	1.32389	0.642057	1.08559	1.30622	1.46728	0.710319	1.68846	0.748306	0.870717	1.74826	1.64759	1.02056	1.34323	1.44412	0.661056	0.87104	1.44657	1.33681	1.08377	1.641	1.81827
0.679669	1.07542	1.31611	0.905607	1.33771	0.936872	1.44206	1.47971	0.283893	0.583869	0.913108	0.178618	-0.0816584	0.254628	-0.17228	1.13691	0.931537	0.581904	0.0353403	-0.490213	0.816896	0.331351	0.945077	0.882819	1.15764	0.459538	0.995418	1.04743	0.516438	0.959472	0.446242	0.914667	1.51273	1.76208	0.735422	0.148667	0.155293	0.963002	1.64344	1.41403	0.908221	1.46371	1.74708	0.0657625	0.408259	0.878613	0.53419	0.850929	1.47177	0.911692
3.84663	4.45002	4.64803	3.59725	4.18622	3.75006	3.72198	4.46605	3.24196	3.54878	3.65494	3.7367	2.67921	3.72725	3.4905	4.34905	3.49319	3.55101	4.0052	3.40756	3.55533	3.9979	3.50604	3.77831	3.49674	3.87082	4.00778	3.99271	3.81449	4.17637	3.19836	3.62457	3.87188	4.42423	3.82702	3.77978	4.41592	3.70741	4.31133	4.6598	3.72268	4.20117	4.00111	3.38708	3.80948	4.12156	4.05117	3.71139	4.17559	3.62961
-0.256807	-2.05989	-3.21533	-0.888669	-2.48071	-0.436164	-0.18197	-3.33646	-1.29727	-1.13416	-2.86008	-0.581712	-1.2582	-1.94384	-0.283113	-2.10067	-0.47765	-0.15731	-1.58155	-0.21133	-0.429419	-2.94974	-0.413061	-0.561602	-0.584712	-1.96261	-1.45361	-2.22283	0.0444775	-0.440548	-2.6657	-1.51849	-0.527372	-2.79558	-0.317008	-3.17769	-2.37764	-1.18787	-1.17159	-2.01878	-0.608012	-0.406318	-1.15711	-0.556747	-0.189318	-1.01334	-1.89429	-2.84775	-1.97344	-0.877701
-0.841736	0.331264	0.871948	-1.01735	0.248173	-2.61394	-0.827931	-0.0900006	-0.942204	-0.402301	0.326792	-0.953706	-0.0593014	-0.463112	-0.658049	0.485553	-1.09716	-1.27646	0.112548	-0.526356	-0.353268	-0.402382	-2.10729	-0.578088	-0.845421	-2.22267	-0.748819	-0.312264	-0.925642	-0.15704	-1.23965	-1.19027	-0.492542	-0.493521	-0.197564	-0.178336	0.127017	-0.502164	-0.246915	-0.192835	-2.42646	-0.58854	-0.128635	-2.53166	-1.7783	-0.775326	-0.167669	-0.620574	-0.754726	-0.357036
-0.27058	-0.686038	-2.98179	0.196701	-0.451629	-0.235852	-0.05371	-0.762104	-0.236636	-0.407225	0.120875	-0.0562258	-0.382669	0.0284133	0.1247	-0.630044	-0.414506	-0.469331	-0.268714	-0.315901	0.197365	0.021575	-0.35331	0.104594	0.0979385	-0.115585	-0.116508	-0.494071	-0.0884438	-0.480385	-0.419497	-0.313108	-0.239192	-0.474967	-0.145298	0.101578	-0.133382	-0.1971	-0.611829	-0.365706	-0.0665398	-0.462972	-0.702298	-0.183353	-0.164861	-0.146778	-0.212939	-0.570091	-0.593934	0.211399
0.463902	0.693904	-0.345695	0.102914	0.92593	0.386353	0.437958	0.611722	-0.311201	0.173314	0.53736	-0.175224	-0.32248	-0.107347	-0.176443	0.503034	-0.173629	0.212801	0.0248547	-0.10603	0.344661	0.24375	0.082531	0.411599	0.672132	-0.483665	0.0955095	0.369451	0.379499	0.815257	-0.355748	-0.117848	0.483543	0.350735	0.18935	-0.522918	0.13015	0.0517373	0.980862	0.799138	0.281561	0.904281	1.22994	0.0147848	0.154729	0.457363	0.375604	0.540493	0.577538	0.221687
4.90256	5.65995	6.14078	4.71333	5.60678	4.66107	5.1196	5.8074	4.75587	4.68009	5.36197	4.65926	4.5948	4.55577	4.43915	5.20884	4.48819	4.45737	5.1618	4.30519	5.15318	5.26234	4.74235	5.17719	5.38431	5.34181	5.40025	5.86055	4.5939	4.98465	4.68482	5.48416	5.35091	5.95067	4.6825	5.0654	5.46109	5.07979	5.3592	5.6178	4.74858	5.07583	5.52342	4.24684	4.02321	5.0008	5.36875	5.70675	4.96479	4.66512
1.88131	2.41387	0.221035	1.3886	2.1358	1.73611	1.72401	2.2205	2.08289	2.2677	2.07427	2.02262	1.70536	1.82484	1.88413	2.27835	1.77157	2.00445	2.04742	1.98275	1.97944	1.93449	1.64069	1.69525	2.00021	1.85602	2.18045	1.7028	2.10583	2.14448	1.92853	1.98965	1.99499	1.90818	2.36779	2.38192	2.64056	1.78992	2.11428	2.39625	2.12988	1.99123	2.00724	1.22698	1.98476	2.0181	2.33411	2.47676	2.47456	2.41646
1.99913	1.43512	1.28529	2.13196	1.74258	1.79989	1.72811	1.62986	2.77454	1.62518	2.2195	2.28472	1.72257	2.03559	1.15932	0.939537	1.84867	1.79375	1.20928	1.46354	1.30594	1.20135	1.57123	1.62527	1.48079	3.5035	2.90274	2.77515	1.72658	1.95266	1.15987	3.63784	1.70276	2.23368	1.59088	1.32301	0.987174	2.1524	1.7004	1.47317	1.73209	1.80867	1.96006	2.0788	1.52266	2.19672	1.69388	1.87039	2.07714	1.97747
-0.626095	-0.0414758	0.480923	-0.747544	-0.43008	-0.597585	-0.708236	-0.290379	-0.892195	-0.575402	-0.571059	-0.76283	-1.33048	-1.09046	-1.07959	-0.40703	-1.00089	-0.606399	-0.442583	-0.891828	-0.623615	-0.375811	-0.985727	-0.43259	-0.995889	-0.566899	-0.763555	-0.461205	-0.668931	-0.391791	-0.557662	-0.537894	-0.601216	-0.285254	-0.881073	1.07211	-0.768474	-0.826076	-0.437477	-0.298982	-0.301663	-0.215464	-0.443944	-0.863381	-1.16722	-0.594765	-0.580281	-0.636631	0.276744	0.363198
0.390298	1.00832	1.16239	0.431242	0.80774	0.568766	0.577221	1.0706	0.229714	0.810835	0.650492	0.239614	0.192884	0.749605	0.498059	1.0508	0.491929	0.467879	0.867482	0.231556	0.660603	0.716877	0.363045	0.654422	0.713133	0.241832	0.479522	0.588705	0.508156	0.645597	1.01864	0.211084	0.614169	0.746475	0.525997	1.21872	1.35692	0.271793	0.658973	0.822976	0.484306	0.736379	0.709324	0.167672	0.180848	0.321707	0.800724	1.13697	1.88327	1.16826
-1.43058	-0.90721	-1.21704	-3.30271	-1.37351	-1.5907	-1.36558	-1.08472	-2.72814	-1.67296	-3.40066	-1.19775	-3.80582	-1.10476	-1.46551	-1.34869	-1.40127	-1.28313	-0.835535	-1.89351	-1.35507	-0.502883	-3.57323	-1.32498	-1.40182	-1.19271	-1.29797	-1.25834	-1.4942	-1.35063	-0.541433	-1.15304	-1.0912	-1.52323	-1.73546	-1.24539	-0.359608	-1.96011	-1.67465	-1.34289	-1.64263	-1.42105	-1.37294	0.0433054	-1.4112	-1.4107	-1.3518	-1.18173	-1.25544	-1.13803
0.186723	-1.01845	-1.23165	0.323885	0.296781	0.616201	0.419726	-0.707157	0.775244	0.68501	0.341858	1.13252	0.700978	0.808074	0.816604	-3.06843	0.117494	-0.0750966	0.663184	0.460779	2.12319	0.414482	-0.0442648	0.736754	0.72297	1.46052	1.38369	0.760139	-0.052515	0.255368	0.919652	1.00231	0.287723	0.181222	0.116516	0.465989	0.0891113	0.430748	1.40136	0.349542	0.559615	1.12712	0.860191	1.13094	0.993672	1.22687	0.510168	-0.224524	-0.573753	-0.0320344
-0.338727	-1.0415	-3.08076	-0.284166	-1.23135	-0.0083046	-0.34546	-1.53202	-0.735719	-0.50976	-1.18888	-0.747458	-1.13455	-1.03789	-0.989853	-2.4416	-0.58328	-0.387415	-1.1912	-0.685447	-1.0508	-1.03975	-0.515817	-0.397217	-1.07163	-0.802361	-1.13369	-0.496895	-0.592795	-0.482784	-1.79964	-0.336478	-0.713404	-1.05938	-0.579463	-1.6849	-0.788479	-0.394113	-0.420687	-1.04077	-1.19941	-1.01594	-1.33915	-0.787745	-0.562386	-0.709189	-1.39202	-1.95087	-1.56552	-0.993914
0.703569	-1.35878	-3.73275	0.442289	-1.08021	0.377418	0.148496	-1.09023	-0.209853	0.388033	-0.814417	0.165609	-0.957223	0.433186	0.16264	-1.16282	0.263753	0.395683	-0.200619	0.0810366	0.219734	-0.156654	0.0397129	-0.0716419	-0.149823	-0.0580759	-0.174274	-0.382942	0.581776	0.250132	-0.689827	-0.131577	-0.0669484	-0.807319	0.714916	-1.55017	-0.377645	0.319588	-0.279293	-1.13906	-0.0724134	-0.0352554	-0.282523	0.246764	0.389928	0.376859	-0.26392	-1.28011	-0.458686	-0.0302196
1.1677	2.2297	1.1517	0.896996	1.49612	0.959443	1.28197	1.73705	0.438683	0.809844	0.827991	0.432326	-0.0931997	0.57206	0.0754642	1.13141	0.569353	0.55086	1.40453	0.403261	0.865842	1.57707	0.913784	1.20865	1.14292	1.02642	1.03374	1.46585	0.794121	1.26733	0.59279	0.815266	1.10224	1.84833	1.00403	1.3033	1.86988	1.0342	1.72647	2.2396	0.930106	1.12105	1.38584	0.353766	0.37845	1.29832	1.12424	1.49892	1.5132	0.791808
-1.00664	-0.508124	1.102	-0.914361	0.609789	-0.748892	-0.577019	0.278087	-0.994705	-0.501976	-0.293426	-0.880645	-0.0632868	-0.770586	-0.336817	1.545	-1.26396	-1.0428	-0.287493	-0.735162	-0.236891	-0.568895	-0.940701	-0.496708	-0.441274	-1.47807	-1.08356	0.171444	-0.888793	-0.300007	-1.05499	-1.2236	-0.244617	-0.0210648	-1.00586	-0.824058	-1.0497	-0.677444	0.156576	-0.303421	-0.877895	-0.410608	-0.52028	-0.957637	-1.45448	-0.61342	-0.25766	-0.767602	-1.46609	-0.231246
3.00461	3.78896	3.93284	2.45569	3.10661	2.91082	2.80786	3.12243	2.11388	2.53747	3.13447	1.99748	1.97741	3.31157	2.50368	2.86664	2.79112	2.57925	3.76083	2.03141	2.92583	3.20036	2.93824	3.32176	3.44871	2.67447	2.6609	3.0834	2.76944	3.0927	4.17745	2.78637	3.6396	4.3567	2.69442	2.7227	3.50164	2.20754	2.58162	2.76724	3.18869	3.00577	3.39984	2.55102	2.62953	3.27831	2.87927	3.66025	3.29265	3.38148
3.66939	2.5358	2.4159	3.36546	3.12786	3.54158	3.42153	3.34901	3.32909	3.36054	3.29081	3.1566	2.54949	3.44837	2.33662	2.81344	3.37084	3.57627	2.28591	2.7776	2.89923	2.53222	3.0162	3.12002	3.02843	3.33411	3.13621	3.2986	3.35108	3.24924	2.09431	3.56197	3.20707	3.13669	3.29525	3.77706	2.59419	3.5431	3.52069	2.94932	3.18513	3.39737	3.32295	3.01977	3.02004	3.64739	2.8877	2.60808	2.85486	3.35919
0.0379753	5.19185	3.95349	-0.0469942	2.87918	0.135467	1.04808	2.82744	0.674809	0.392273	4.03999	1.03524	0.368099	1.43367	-0.195611	1.07069	-0.0629845	0.795783	3.219	0.714528	2.24625	3.96362	-0.262531	0.00762653	1.40001	0.587075	0.0391989	1.36855	-0.369197	0.0422897	1.29	0.0658646	-0.24789	3.54104	-0.392592	2.41254	2.99009	1.32342	0.495912	1.20985	-0.0596991	0.821503	0.363567	0.0307341	0.85658	1.61323	1.87155	4.91631	1.12809	0.516022
0.5032	-0.118455	-0.64663	0.339303	0.12484	0.243881	0.221991	0.309391	0.00737476	0.175372	0.19604	0.392489	-0.548435	0.114239	0.157446	0.0434399	0.099227	0.277237	0.137317	0.343396	0.287206	0.0650501	0.21625	0.220973	0.110493	0.118274	0.182322	-0.0577078	0.392807	0.369521	-0.476958	0.022542	0.0754876	-0.181974	0.570617	-0.155948	0.165523	0.167824	0.272988	0.0998816	0.393218	0.357957	0.333485	0.271257	0.402094	0.395098	0.305405	-0.0268383	0.386331	0.233777
0.217313	0.531706	1.14163	0.263285	0.97957	0.241185	0.319055	0.716386	0.587954	0.51962	0.935308	0.57734	0.922491	0.099504	0.257628	0.998841	-0.0504131	0.118163	0.50152	0.200864	0.195193	0.52348	-0.171185	0.121233	0.127249	0.44922	0.690819	0.990863	0.110395	0.547785	-0.983167	0.591613	-0.0654168	0.656799	0.215845	0.320482	0.527549	0.331142	0.706186	0.547179	0.251421	0.35382	0.811691	0.226585	0.406709	0.556482	0.540726	0.386763	-0.150217	0.275593
-0.388209	0.810794	0.654759	-0.527274	0.0555558	-0.411636	-0.391277	0.751608	-0.346788	-0.396352	0.444996	-0.54207	-1.17457	-0.274072	-0.355293	0.504165	-0.495765	-0.3875	-0.00821972	-0.590519	-0.191253	0.371788	-0.617599	0.0913286	-0.1062	-0.499386	-0.121922	-0.0557165	-0.532725	0.110841	-0.474425	-0.415398	-0.445924	0.56342	0.00258207	0.0605631	1.58269	-0.396822	-0.454679	0.220271	-0.669801	-0.249464	0.074338	-0.488334	-0.707208	-0.234214	-0.101104	0.905893	0.485909	0.24475
0.694737	1.49696	1.53455	0.655239	1.36879	0.860133	0.911111	1.44068	0.0358887	-0.146006	0.46881	0.464134	0.742246	0.602426	0.404576	0.958765	0.460309	0.111567	0.814525	0.234121	0.841655	1.4086	0.609816	0.918577	0.862221	1.11981	1.08703	1.32495	0.242236	0.559992	0.256073	0.642645	1.12248	1.97537	0.486078	0.88394	0.845485	0.844817	1.65165	2.21351	0.846206	1.24932	0.89503	0.0601044	-0.250378	0.366718	0.749515	0.836182	0.0522423	-0.0122561
0.095561	-0.766314	-1.20464	0.173521	-0.276591	0.352859	0.100365	-0.663965	-0.0393009	0.0238776	-0.061409	-0.21226	-0.453601	0.550521	0.120408	-0.275855	0.0990677	0.259006	0.0351353	0.159869	0.0777144	-0.642059	-0.0701027	-0.304746	0.0726328	-0.00971222	-0.075882	-0.454874	0.166288	0.346985	0.617957	0.169543	0.196656	-0.6028	0.326395	-1.01317	-0.688585	0.0433431	-0.10538	-0.651443	0.0809641	-0.0414085	0.0677347	-0.0133018	0.288745	0.162025	-0.312451	-0.33881	-0.207487	0.314643
-0.00684071	0.37693	0.893539	-1.19294	1.87959	0.123681	0.376941	0.786958	0.0167694	0.261212	0.852728	-0.285906	0.694029	-0.185791	0.404817	2.04357	-0.289917	-0.982698	-0.00816727	-0.719017	0.199719	-0.322507	-0.200563	0.261463	0.487965	-0.728359	-0.177257	0.921558	-0.378425	0.568836	-0.199913	-0.389935	0.294909	0.852695	-0.406278	-0.205289	-0.447673	0.0727124	1.16504	0.916188	0.456655	0.401681	0.495899	-1.34472	-0.987329	-0.0170946	-0.0383987	-0.523	1.23121	0.952698
4.04031	4.4119	4.03683	3.76537	4.38697	3.98935	4.13325	4.40519	3.6599	4.15228	4.4813	3.94893	3.51363	4.10564	3.90256	4.525	3.66593	3.8025	4.39587	3.51209	3.80284	4.05262	4.16923	3.84952	4.09984	3.99407	4.20828	4.17393	4.15349	4.42007	4.83842	4.00954	4.37224	4.57048	4.09152	4.13997	4.53919	3.75665	4.49845	4.50511	4.18145	4.42007	4.58791	3.46918	3.60713	4.20496	4.22672	4.09016	4.21944	4.31044
1.56934	1.77171	1.66633	1.49689	1.98251	1.50791	1.72562	1.87257	1.20926	1.71141	1.74584	1.482	1.04808	1.74189	1.34696	1.69934	1.51571	1.51434	1.72773	1.08282	1.45326	1.62202	1.79229	1.53039	1.78406	1.62991	1.80064	1.74737	1.59082	1.69864	1.92984	1.56509	1.74056	2.03401	1.50495	1.25975	1.87204	1.47566	1.84721	1.92	1.76181	1.80018	1.99034	1.30401	1.41481	1.64073	1.77033	1.44467	2.10561	1.58452
2.01466	2.29158	2.13479	1.89835	2.36598	1.96448	2.20303	2.30961	1.71382	2.32872	2.15036	1.88496	1.62107	1.94022	1.66478	2.09986	1.87916	1.93036	2.188	1.45319	1.92827	2.04331	2.26443	1.98545	2.13754	2.02518	2.26124	2.38056	1.93587	2.22969	2.89232	2.01535	2.32813	2.59369	1.82515	1.82406	2.19439	1.88078	2.31852	2.354	2.03502	2.15775	2.3153	1.56673	1.65641	1.95696	2.17677	1.85343	2.34714	2.09442
3.55373	4.23202	3.82386	3.50146	4.13156	3.70045	3.88159	4.17936	3.22947	3.82437	3.90582	3.59721	3.43046	3.77052	3.43754	3.72693	3.56946	3.5905	3.8721	3.2017	3.39692	3.85201	3.96487	3.64131	3.66301	3.73098	3.8774	3.96668	3.83823	3.93985	4.49118	3.71823	3.9394	4.57271	3.7647	3.7458	4.18829	3.53702	4.07834	4.21647	3.71921	3.94598	3.93355	3.28979	3.81121	3.93537	3.92009	3.56125	4.1186	3.88606
0.116626	-0.861575	-0.393073	0.189752	-0.432765	0.0194483	0.238756	-0.643779	-0.0490456	-0.324071	0.063138	0.149526	-0.191875	0.256822	-2.85063	-0.634617	0.155191	0.0133471	-0.359116	0.047699	-0.26067	-0.180706	0.0391817	0.120297	0.20929	0.208537	0.0228596	-0.158691	0.0353546	0.122445	0.313978	0.305139	-0.0329928	0.0894012	0.14633	-0.444184	-0.179873	0.121112	-0.260473	-0.499336	-0.348891	0.090621	-0.032279	0.0190802	0.247593	-0.0195255	-0.406882	-0.530023	-0.681167	-0.103697
1.4489	1.91369	2.21547	1.31353	0.677605	1.40566	1.60102	2.09704	1.59678	1.41314	1.57545	1.39797	1.54551	2.03223	1.03261	0.776172	1.03268	1.05111	1.03025	0.806434	1.02203	1.35178	1.56809	1.5684	1.18001	2.42978	1.86632	1.57648	1.51476	1.53728	1.14768	2.06361	1.2317	1.29372	1.83814	1.31743	0.783217	1.63912	1.00376	0.914804	1.48799	1.37796	1.2763	1.34093	1.01026	1.8344	1.48377	1.62905	2.10952	1.82788
-1.68247	-0.0754695	4.99209	-1.30989	0.106187	-1.84064	-1.21881	-0.494848	0.391383	-0.537545	-0.727407	-0.637196	1.21522	-0.258968	-1.41727	-0.535131	-0.663527	-1.15605	-3.03677	-1.71932	-1.15481	-1.31001	-2.93285	-1.28418	-1.51861	-1.84027	-1.58301	-1.0318	-0.580112	-1.03039	2.26244	-1.35125	-2.91625	-1.06353	-1.58363	0.276843	3.10485	-0.924585	0.413678	3.90308	1.42008	-1.74894	-0.957394	-0.663113	-1.75135	-0.75766	0.884824	3.56723	-1.98013	-0.640264
5.57894	6.54232	5.73571	5.63505	6.54012	5.37768	5.78111	6.50798	5.64771	5.58969	6.40567	5.8559	5.83005	5.8259	5.54119	6.66055	5.33698	5.17248	5.97788	4.87619	5.79555	6.01121	5.43879	5.66983	5.69992	6.22451	6.22504	6.45653	5.30906	6.03964	5.94976	6.10326	5.73939	6.40751	5.50809	5.52808	6.04957	5.90471	6.05355	6.28404	5.79277	5.94521	6.35538	5.32532	5.28716	5.95581	6.13114	6.40621	5.00697	5.73543
-0.373438	0.262496	-0.265083	-0.794818	-0.279312	-0.580177	-0.515171	0.000319958	-0.821577	-0.404751	-0.25391	-0.475569	-1.19939	-0.83863	-0.375061	-0.211855	-0.825687	-0.558494	-0.535994	-0.430209	-0.110116	-0.302231	-0.625274	-0.430594	-0.482641	-0.687285	-0.397221	-0.323284	-0.691892	-0.190926	-1.3324	-0.969934	-0.561842	-0.43017	-0.392396	-0.507925	0.141077	-0.643082	-0.397188	-0.309519	-0.345256	-0.431648	0.0172386	-0.584055	-0.333977	-0.336669	-0.218255	0.0800381	0.142032	-0.415614
4.65243	5.12359	3.38557	4.23389	4.94957	4.29263	4.42316	5.36204	3.82128	4.09137	4.34708	4.41943	3.65677	4.39665	4.52256	4.79547	3.92684	4.13126	4.73839	3.95186	4.41294	4.82699	4.1142	4.42588	4.24586	4.50235	4.82909	4.72369	4.46781	4.84932	4.11356	4.3417	4.59033	5.27613	4.36365	4.58871	4.91587	4.23302	5.09019	5.47012	4.38678	4.86837	4.84137	4.14625	4.47086	4.84951	4.68987	4.70334	4.73873	4.55827
-0.286953	0.711724	1.22711	0.200891	0.582292	-0.244454	-0.0310774	0.920447	0.275812	0.72996	1.44962	0.188211	-0.139287	0.652326	0.105819	0.746809	-0.163662	-0.30104	0.128304	-0.0815077	0.0802712	0.238576	0.817883	0.057621	-0.307855	0.202727	0.30875	0.439067	-0.251586	0.00785542	-0.114014	-0.123028	0.133166	1.36455	-0.709939	-0.332287	0.304427	1.50776	0.303824	0.9518	0.160914	-0.0205517	0.106983	0.175804	0.278759	0.585587	0.449998	0.434304	0.206139	-0.223096
1.07047	2.06575	2.43535	1.16336	1.79551	0.996732	1.58184	2.01227	1.05815	1.30096	1.42024	1.37274	1.02834	1.3373	1.03308	1.67558	0.829416	0.595492	1.69052	0.527514	1.4167	1.96745	1.07753	1.65166	1.60119	1.80352	1.73239	1.8989	1.04362	1.22831	1.33723	1.54402	1.37556	2.20237	1.0516	1.83374	2.61147	1.18809	1.74176	2.22608	1.43244	1.43406	1.3837	0.800943	0.995335	1.62147	2.08597	2.46369	2.24693	1.31734
2.17903	3.1289	3.20386	1.82983	2.58937	1.9688	2.33638	2.7196	1.8563	2.05781	2.22544	2.03794	1.79591	2.00164	1.91491	2.48648	1.80167	1.91314	2.36576	1.67123	2.16098	2.3765	2.03492	2.4319	2.04344	2.13405	2.24955	2.56881	2.17827	2.63163	1.8692	2.26188	2.34112	2.75318	1.93539	2.46502	2.70101	2.01725	2.69999	2.94454	2.11551	2.42985	2.38536	1.64265	1.89313	2.42399	2.37045	2.33782	2.72148	2.26292
4.93661	6.22639	6.10186	4.62568	5.41522	4.66307	5.00392	5.75836	4.47754	4.65167	4.79158	4.59609	3.97776	4.62403	4.46711	5.47956	4.51121	4.51931	5.33712	4.3799	4.77983	5.42521	4.52623	5.09414	4.62441	4.86694	4.9624	5.39588	4.69714	5.16828	4.5311	4.85156	4.90321	5.88031	4.67129	5.36244	5.85383	4.73325	5.56439	6.25157	4.83934	5.12469	5.25919	4.42575	4.48324	5.21852	5.22691	5.37343	5.74016	4.7669
3.95029	-0.109715	-0.699949	3.89998	2.96588	3.55459	3.45882	2.69547	4.16198	3.65233	3.90033	3.59097	2.92225	3.52482	2.48556	1.50073	3.80282	3.62703	2.24069	3.1721	2.97146	3.6602	3.10856	2.80574	2.55213	4.9249	4.57433	4.2638	3.44475	3.28244	-0.117797	5.23873	3.08455	3.95636	3.1558	-0.497599	1.54599	4.10791	3.35323	2.16026	3.51386	3.26329	3.55304	3.59959	3.09215	4.05439	2.97139	3.00429	1.95526	3.54668
2.55062	1.96037	2.60077	2.57565	2.3464	2.43509	2.59646	2.07075	2.36573	2.23671	2.26936	2.2616	2.11354	2.05502	1.67503	2.13961	2.31578	2.21666	1.74097	2.16199	2.16537	1.96453	2.30651	2.26756	2.1728	2.2731	2.28852	2.34766	2.61544	2.41442	1.44931	2.42075	2.32852	2.28446	2.51422	1.60155	2.01796	2.61742	2.5089	1.74908	2.20185	2.4273	2.303	2.0467	2.32114	2.16243	2.13906	2.26282	1.66768	2.12985
1.55447	1.90077	1.41331	1.20724	1.81306	1.20107	1.38803	1.87872	0.544956	1.03341	1.08253	1.15001	1.06714	1.13365	1.3982	1.74746	0.746181	0.934428	1.34521	0.442948	1.16374	1.54306	0.781459	1.35659	1.04492	1.24363	1.42834	1.51236	0.99538	1.50036	0.488798	1.11588	1.26833	2.11693	0.91261	1.28848	1.53551	1.10307	1.79782	2.09297	1.22749	1.60335	1.53958	0.716938	0.393299	1.48153	1.40042	1.23806	1.28458	1.05743
-1.978	1.0842	-1.29197	-1.10572	1.15568	-2.38544	-2.58955	1.9718	0.861796	-0.921852	2.10001	-2.91971	-0.140717	1.27105	-1.98601	-0.89113	-2.00701	-3.39011	-2.10574	-2.68287	-1.93315	0.174091	-2.86796	-2.33773	-2.68636	0.142759	-0.991127	-0.0356503	-1.96546	-1.79597	0.590971	0.672093	-2.35159	2.4328	-2.70326	-2.293	0.507845	3.20941	-1.72361	2.77174	-2.43502	-3.18255	-2.07899	-1.49272	-2.94188	1.49533	-0.500792	2.13522	-2.39635	-0.819321
-1.49223	-0.183715	0.82663	-2.46493	0.306523	-1.8426	-0.976644	-0.100011	-1.48961	-1.03349	0.65316	-1.55615	-1.41734	-1.59579	-1.83221	-0.498251	-1.98307	-1.68118	-0.780639	-2.35548	-0.99506	-0.781485	-1.17822	-1.14945	-1.00556	-1.99559	-0.962265	-0.652961	-2.63069	-0.675883	-1.55435	-1.31797	-1.24226	-0.342573	-1.17341	-0.908538	-0.379861	-1.28152	-1.27997	-0.891648	-1.44439	-1.27305	-0.409945	-1.47068	-1.93191	-1.35309	-0.692941	-0.843826	-1.0994	-1.38457
1.24919	1.85185	1.99097	1.11704	1.59405	1.29057	1.37109	1.87692	0.947078	1.3434	1.22818	1.18962	0.912049	1.31128	1.16899	1.78944	1.11557	1.18651	1.31827	0.93632	1.2574	1.69255	1.29192	2.03075	1.12875	1.4517	1.59036	1.73561	1.55943	1.67624	0.916201	1.36853	1.49933	2.79229	1.48492	1.68097	2.20666	1.31721	1.4463	1.81203	1.17483	1.53046	1.36545	0.985242	1.04725	1.38829	1.51897	1.49387	2.30391	1.87518
2.95045	3.2623	3.4532	3.34122	3.71821	3.1121	3.34138	3.83472	2.54043	2.85592	3.09374	2.37134	2.33016	2.2422	1.81002	3.62506	2.59384	2.28525	3.36085	1.94239	3.42083	3.9235	3.03002	3.28836	3.41028	3.10007	3.40685	3.69412	2.594	2.84886	2.56518	3.09169	3.58071	3.56986	3.12765	3.37209	3.72159	3.15736	3.98583	4.58194	2.9525	3.16967	3.49292	2.0378	2.21823	2.83438	3.53352	3.40434	3.56544	2.75317
-1.23845	-0.105315	0.41886	-1.71626	-0.0851045	-3.11291	-1.03033	-0.738077	-3.12386	-2.32778	-1.22854	-1.15755	-2.17644	-1.92364	-1.96623	-2.51796	-3.26664	-3.55805	-1.07536	-2.66532	-3.60043	-0.088026	-2.26672	-3.02097	-0.427796	-1.49188	-0.76478	-0.544494	-3.44184	-0.827697	-0.393252	-1.14676	-0.0538888	-1.22948	-2.61617	-1.24423	-1.10543	-1.16123	-0.362299	-0.760898	-3.19265	-1.054	-0.947729	-2.89472	-2.69247	-0.961989	-1.35751	-1.39788	-1.23837	-1.86534
2.05003	2.32704	2.41621	1.7758	2.37706	2.11276	2.14468	2.17336	1.3189	2.10858	2.06404	1.34555	1.11632	1.64227	1.54006	1.91058	1.87616	1.84029	1.54362	0.838777	1.60604	1.75967	1.97524	1.91256	2.06227	1.3494	1.77232	2.21971	2.0054	2.2711	2.39988	1.56389	2.19993	2.67177	1.77507	1.34177	1.62794	1.78213	2.55053	2.25688	1.9028	2.1988	2.32237	1.25666	1.26557	1.57593	1.65529	1.49111	2.36233	1.95324
1.85041	2.03323	2.03882	1.8438	2.12227	1.88045	2.11526	1.95507	1.47596	1.89304	2.26117	1.42394	1.42401	1.17763	1.19194	1.76632	1.54054	1.76401	0.964284	1.24357	1.21813	1.03667	1.69403	1.42429	1.61761	0.910504	1.53722	1.83618	1.83389	2.094	1.37263	1.3724	1.87119	1.9398	1.92063	0.694593	1.04334	1.67876	2.3461	1.96394	1.3874	2.07138	2.24627	1.1937	1.64982	1.54135	1.38145	1.48656	1.45316	1.6803
2.48107	2.87881	2.56606	2.24525	2.48363	2.45272	2.57283	2.61616	2.05158	2.92019	2.64437	2.21988	1.95628	2.51688	2.22605	2.48898	2.23171	2.2746	2.59121	2.20009	2.45842	2.4859	2.7333	2.35733	2.517	2.55689	2.61752	2.64422	2.69425	2.51212	3.32125	2.44047	2.78725	3.26041	2.44097	2.41104	2.92565	2.17473	2.82259	2.92184	2.39945	2.56375	2.72895	2.11754	2.45162	2.37709	2.615	2.37014	3.00335	2.63459
-1.98822	-2.36973	0.483988	-2.59938	-0.913295	-3.25721	-2.57078	-0.991965	-2.05981	-3.149	-1.1637	-3.54764	-2.42271	-2.54049	-1.79342	-0.00948715	-1.56131	-1.69574	-1.98273	-2.18903	-1.29737	-1.98422	-2.12258	-2.00932	-1.76068	-2.34928	-3.05985	-1.33798	-2.31556	-1.62312	-3.24834	-2.10319	-1.91536	-1.48181	-1.93623	-1.63161	-3.42712	-1.8815	-1.92331	-1.85901	-1.94919	-1.75932	-2.38896	-2.29516	-2.39531	-2.20348	-1.65871	-2.03032	-2.52329	-1.71973
2.67232	2.91407	2.83394	2.40979	2.79876	2.04536	2.74687	2.75658	2.00484	2.87752	3.09857	2.36588	1.32945	2.50142	2.04256	2.37654	2.54227	2.57363	3.03353	1.7441	2.77735	3.00695	2.73325	2.47397	2.62031	2.93767	2.86822	2.87194	2.39993	2.7219	3.47944	2.55943	2.95959	3.1729	2.71536	2.35366	2.86403	2.75861	2.98225	2.99956	2.63057	2.87586	2.96204	2.0693	2.40685	2.87771	2.75105	2.79894	3.08594	2.76333
1.70694	-0.78719	-0.176328	2.30224	1.16375	2.66144	2.62821	0.866983	1.7328	1.70359	0.97628	1.33752	0.457413	1.25432	0.365962	-0.703652	2.11239	1.87114	-0.294643	1.99733	1.48424	1.79376	1.70969	1.14787	1.07213	2.04824	1.80632	1.48798	2.00446	1.26483	-0.658484	1.55377	0.67594	1.90776	2.32842	1.27375	0.598593	2.17086	1.46621	0.627464	1.68767	1.30482	1.05431	2.00734	1.94343	1.90425	0.605423	0.501881	1.03021	1.29799
0.0310068	0.778348	0.919472	-0.13772	0.205546	-0.462154	0.191472	0.646434	-0.592307	-0.00560522	-0.899486	0.316904	-0.64197	-0.191062	0.191062	1.20373	-0.510646	-0.35605	0.579471	-0.189858	-0.0635896	0.217452	-0.208205	0.379284	0.0642014	0.197922	0.360116	0.435709	0.0264635	0.386972	-0.401352	0.223847	0.272314	0.31923	0.165008	0.646317	0.331741	-0.401908	0.0758343	0.209631	0.530251	0.166746	-0.147489	-0.570783	-0.445937	0.12042	0.0421257	-0.234712	1.50473	0.675645
2.06835	0.800564	-0.460599	1.62074	1.07013	1.8854	1.81676	0.318449	1.65318	1.89756	1.38758	1.86614	0.288193	1.8317	1.51697	-0.643578	1.98814	1.82156	0.567356	1.89134	1.78738	-0.529489	1.70481	1.70114	1.65377	2.25855	2.3118	1.02043	1.85613	1.84348	1.68221	2.43755	1.85624	1.50809	1.36906	-2.85538	0.530571	2.01291	1.50855	0.657983	1.67067	1.85567	1.8871	1.76272	1.71728	2.0005	1.22856	1.58241	1.20701	1.70939
-1.63743	0.241695	-0.740724	-0.834985	-0.519422	-1.46029	-1.39289	-0.485026	-0.909943	-0.888442	-0.837612	-1.27753	-1.12238	-2.80186	-2.73803	0.203366	-0.708159	-2.67787	-2.9091	-2.25813	-0.786733	-0.83919	-2.28958	-2.70906	-0.793198	-1.83306	-1.41029	-1.18171	-1.06743	-2.54202	-2.3487	-0.829508	-1.8859	-0.854	-3.30628	-0.644524	-0.838258	-0.128397	-1.92446	-0.360482	-1.5298	-1.98926	-1.78722	-1.28417	-1.243	-1.20988	-0.689015	-0.0797882	-1.49144	-2.65155
-0.163737	-0.480855	-1.05538	-0.225631	-1.16301	-0.350424	-0.37274	-0.887002	-0.644319	-0.704838	-1.31044	-0.232978	-1.25241	-0.52142	-0.266924	-1.10647	-0.682372	-0.0543189	-0.321732	-0.407558	-0.667443	-0.492815	-0.38531	-0.541162	-0.563934	-0.156171	-0.384833	-0.49708	-0.38024	-0.368115	-1.34649	-0.437364	-0.672439	-0.930005	-0.228674	-1.04465	-0.430624	-0.613461	-0.585851	-0.906879	-0.665939	-0.603197	-0.509291	-0.444573	-0.649716	-0.294944	-0.912893	-0.495826	0.243576	-0.509076
0.28306	1.38783	4.16889	0.952783	2.95193	0.724627	1.29876	1.93674	1.03693	1.72918	1.64351	1.22886	3.64334	2.02307	1.31812	2.39641	0.20528	0.643853	0.857791	0.763051	0.919257	0.902053	0.534049	0.984835	1.97204	0.359055	0.531911	1.64306	0.540259	0.870933	0.431208	0.104178	0.772502	1.20802	0.485494	0.293565	0.286351	1.30602	3.03415	0.556192	0.569013	0.970479	0.774487	0.59617	0.957689	1.89088	1.48587	0.923187	1.15187	1.62225
-0.655069	-1.09263	-1.17921	-0.948442	-1.43122	-1.02172	-0.851905	-1.29909	-1.19282	-0.990154	-1.24519	-0.906911	-1.4536	-1.22932	-1.03786	-1.09462	-1.28975	-0.744942	-1.18666	-1.09371	-0.891901	-1.22477	-1.1067	-0.990861	-1.39937	-0.933153	-1.21126	-1.20194	-0.819952	-1.13603	-1.56406	-1.42818	-1.21965	-1.20399	-1.00903	-1.6028	-0.904927	-1.00272	-1.16141	-1.31801	-1.0515	-0.882455	-1.03417	-1.11951	-1.05744	-1.17021	-1.13174	-1.26384	-1.00279	-1.08352
-3.38182	-0.711237	-3.18285	-2.43898	-0.428186	-1.16012	-0.804274	-0.754082	-2.43245	-3.4944	-0.181415	-0.490096	-1.9591	-2.40091	-0.772138	-0.431959	-2.32386	-0.457198	-3.09494	-2.77085	-1.98233	-0.757476	-0.998967	-2.09978	-0.231504	-3.22715	-2.89666	-0.521351	-2.89748	-0.0634804	0.346993	-0.369631	-0.594128	-0.511574	-0.677055	-0.0381479	-0.134425	-2.42025	-0.347197	-0.139247	-0.476642	-0.506532	-0.36713	-3.04777	-2.67329	-0.325587	-0.19673	-0.212523	-0.452542	-2.89016
-3.46159	-0.855898	-1.38985	-3.08095	-0.769775	-3.05726	-1.81768	-0.0789123	-2.02092	-1.17079	-1.34828	-2.14178	-1.10361	-2.69656	-1.81006	-0.23696	-3.06021	-1.97688	-0.848509	-2.77927	-1.733	-1.00069	-1.7424	-1.65302	-1.98316	-2.24745	-1.76942	-0.994823	-3.20255	-1.5214	-1.666	-1.00759	-1.34471	-1.25367	-3.15159	-0.0217133	-1.00997	-2.47176	-1.33165	-0.936283	-3.35731	-1.53104	-1.88945	-2.67525	-2.31884	-2.20421	-1.51304	-1.9374	-1.00296	-1.29728
3.55845	4.81121	5.69841	3.82757	5.29558	3.75092	4.54851	5.50455	3.58942	3.91616	4.96351	3.58527	3.57683	3.65228	2.97219	4.78263	3.49654	3.25195	3.53329	2.5954	3.89593	4.1481	3.7198	3.94409	4.35709	3.80305	4.18497	4.99271	3.22304	4.69622	3.97306	4.00083	4.95357	5.27777	3.57724	4.49542	3.57375	3.69297	5.45452	5.03088	4.09994	5.16062	5.33104	3.52271	3.84499	4.26147	4.0609	4.10929	4.5678	3.97192
1.49092	0.874439	-3.43676	1.26376	2.50244	0.530178	1.12691	0.917227	2.46434	0.669782	1.86678	1.29551	2.04766	1.7565	1.08284	-0.0226736	1.06206	0.686734	1.12134	1.44061	0.866428	0.684659	1.47026	1.10369	0.929151	2.47165	2.65595	0.469337	0.282456	1.06488	1.22582	2.035	1.45985	-0.38301	1.34028	0.789865	0.252835	1.88332	1.84842	0.464365	0.401106	1.81967	1.04185	1.39837	0.556574	1.57254	0.942409	0.189453	0.205763	1.79611
-1.56166	-2.64758	-0.950333	-1.42039	0.17116	-3.31872	-1.5631	-0.811308	-3.17394	-2.61874	-1.56504	-2.72591	-3.26088	-2.49325	-1.79176	-1.43626	-3.1732	-2.42225	-2.43761	-1.56997	-2.85826	-0.334162	-1.72618	-1.80679	-1.99228	-2.1678	-2.33389	-0.498722	-2.81299	-1.45719	-2.68405	-1.78608	-1.62116	-0.131688	-1.87176	-2.69503	-3.38552	-1.99175	0.817845	1.03997	-1.70967	-0.526474	-1.17012	-2.26936	-2.16813	-0.662852	-2.4201	-2.82451	-1.8302	-1.82534
-2.75752	0.93223	-2.64491	-2.56499	-0.960667	-0.762503	-1.02849	0.0486617	-2.605	-0.508612	-0.932408	-1.24622	-0.00897026	-1.88289	-2.29032	0.639351	-0.767932	-3.32373	-1.23704	-2.6823	-0.760359	-0.728134	-2.87277	-0.99967	-0.06563	-1.83281	-3.58947	-3.39498	-4.11789	-1.7779	-1.53854	-2.90574	0.0116897	-1.12752	-1.02086	2.50178	-0.220839	-1.42093	-0.320787	-0.860687	-2.64216	-1.43456	-1.0779	0.253233	-3.42633	-1.55777	-1.08437	-1.00859	3.10464	2.31749
-0.411053	-0.474949	-1.02839	-0.817924	-0.373538	-1.05027	-0.925014	0.0180535	-1.50446	-1.06142	-0.507724	-0.776921	-2.02663	-0.495998	-0.74584	-0.228996	-2.02776	-1.51755	-0.824892	-1.45148	-0.990002	-0.489489	-1.25838	-0.325829	-1.59025	-0.102187	-0.452408	-0.198249	-0.407248	-0.343559	-1.38154	-1.08508	-0.328282	-0.0602207	-1.36901	-0.707928	0.20388	-1.21541	-0.599051	0.141085	-0.725295	-0.568787	-0.077157	-0.715224	-1.10957	-0.61051	-0.405444	0.0476522	0.0217085	-1.04061
0.576429	0.624527	0.575024	0.401875	1.05568	0.540732	0.507028	1.18592	0.213129	0.575314	0.837913	0.537716	0.172785	1.23733	0.940052	0.893659	0.641017	0.112019	1.18015	0.24726	1.01917	0.746827	0.667167	1.00631	1.11001	0.750096	0.84372	0.955777	0.655179	0.861612	1.56535	0.424654	1.10423	1.07168	0.719683	0.742469	0.990415	0.539971	0.797391	0.967487	0.950055	0.800867	0.880172	0.308875	0.391209	0.824007	0.893584	0.622423	1.18711	1.10675
-2.50381	-0.00931692	-1.22178	-0.877346	-0.348513	-3.19212	-1.3343	-1.31859	-0.949264	-0.738308	-0.579163	-3.44839	-2.4946	-3.13364	-2.3916	-1.56468	-1.17896	-2.03966	-1.17831	-2.12449	-0.628824	0.475374	-2.82419	-2.92941	-1.16906	-3.10172	-0.927826	-0.440074	-2.35582	-1.12959	0.0460944	-2.43517	-1.3745	-0.377023	-2.33923	-1.71537	-1.20874	-0.949578	-0.620195	-0.754612	-3.16149	-0.910436	-1.05732	-2.79708	-2.85365	-0.702377	-0.0708885	-0.341208	-1.1898	-1.11151
-0.63804	0.374729	2.04145	-0.448609	2.01549	-0.32953	-0.0262461	0.826624	-0.215125	0.0740886	1.89396	-0.308684	1.16242	0.271259	0.131797	1.61842	-0.421609	-0.515402	0.307539	-0.370475	-0.100421	-0.115939	-0.342687	-0.073494	0.511821	-0.798162	0.256751	0.905472	-0.596803	0.732105	0.220991	-0.59092	0.0202613	1.09522	-0.309922	-0.334445	-0.590022	0.0913844	1.14382	0.439669	0.0301037	0.015708	1.54837	-0.82651	-0.534507	-0.0305653	0.267007	0.251051	1.03947	0.653444
0.515613	0.367625	-0.24213	0.397305	0.139328	0.269984	0.241915	-0.104999	-0.0424261	0.298913	0.585338	0.560939	-0.547947	0.486674	0.419572	-0.130319	0.0612345	0.265761	0.683737	0.135369	0.253651	0.0786686	0.0271063	0.240668	-0.131033	0.215386	0.195271	0.0498304	0.456455	0.406815	-0.605949	-0.101224	0.0999637	-0.0690222	0.66825	-0.176824	0.639888	0.173388	0.230428	0.0799518	-0.176992	-0.317885	-0.160486	0.447434	0.712519	0.612974	0.427607	-0.257684	0.11093	0.09238
1.07204	-2.65826	-3.32329	1.98413	-0.262022	0.540365	0.456511	-1.06958	2.07851	-0.387201	1.57045	3.04569	1.72744	2.41115	-0.105584	-3.16713	0.406022	-0.438125	-2.28577	-0.361109	-0.83575	0.858805	0.927117	-0.19855	-1.16834	4.73479	4.33481	2.78156	0.890399	-0.183748	-3.49398	4.12502	-0.633764	-0.59611	0.0212541	-2.10946	-3.3545	2.51789	0.429721	3.02148	1.099	1.22048	2.10704	3.75619	1.16701	2.77606	0.721647	-0.421475	-0.405405	2.07789
4.47329	3.91258	3.30642	4.23893	4.43532	4.90494	4.80723	3.87942	4.02953	4.39065	4.07359	4.5578	4.31077	4.43629	4.21764	4.35802	4.38122	4.62877	4.28338	4.33894	4.34265	4.02711	4.27042	4.44928	4.36876	4.0998	4.15156	4.52921	4.47628	4.63719	4.1124	4.16014	4.51471	4.73007	4.20624	4.19194	4.17397	4.45273	5.12946	4.22002	4.96255	4.69715	4.49736	4.52115	4.2688	4.65043	4.35194	4.00367	4.47165	4.09602
0.838787	1.00058	2.13103	0.3761	1.88008	0.61974	0.969444	1.34772	0.124987	0.799604	1.55564	0.499243	1.00223	0.262109	0.747717	1.25428	0.595292	0.88346	0.718648	0.0294285	0.660574	0.476131	0.589651	0.769474	0.906837	0.000852585	0.597445	1.07417	0.819986	1.10896	0.700022	0.413587	1.07486	1.28534	0.809839	0.777346	0.2112	0.70585	1.49829	1.20688	0.628511	1.19893	1.5622	0.0758677	0.508246	0.480215	0.960606	0.710447	0.693259	0.930271
1.84015	0.297577	-3.99113	2.3639	1.77476	2.26523	2.01818	2.00982	3.07587	2.18819	2.95569	2.1224	2.54307	2.36168	1.15631	-2.7212	2.05727	1.44187	-0.905557	1.87126	1.58314	0.908375	1.70597	1.76503	1.63372	3.61981	2.82889	3.44988	1.56753	1.58476	-0.241265	3.89055	1.60053	2.50923	1.81242	-1.15961	0.307762	2.36378	1.75674	1.6177	2.04986	1.95565	2.38476	2.23736	1.88306	2.84211	2.27198	2.92575	0.599836	1.68658
2.9373	3.82475	2.49453	2.77168	3.02522	2.76647	2.9121	3.1712	2.37598	2.45549	2.6292	2.50537	2.03384	2.14652	2.22936	2.82903	2.677	2.82326	2.98112	2.44585	2.74411	2.62455	2.67565	2.83129	2.53454	2.05387	2.24063	2.54428	3.11219	3.15188	2.51382	2.27999	2.99052	2.45058	2.97431	2.04125	3.09165	2.61795	3.0788	3.58216	2.65312	3.20911	3.11924	2.33639	2.62587	2.61267	2.84127	3.61301	2.44844	2.68381
-2.89539	-0.913828	-1.15416	-4.25318	-1.33654	-1.71694	-0.875338	-1.26047	-0.989192	-1.43415	-0.937954	-1.92217	-2.48138	-3.59854	-1.72849	-0.704359	-2.06242	-3.45198	-1.37266	-0.547031	-1.2013	-1.02126	-2.81456	-1.59377	-2.72978	-1.08914	-1.00206	-1.30202	-2.82982	-0.896738	-1.71738	-1.5418	-3.6578	-1.41915	-2.49603	-1.04913	-0.974213	-1.31473	-1.48881	-0.694403	-0.958755	-1.22513	-1.17538	-2.93244	-2.15954	-1.27465	-0.842632	-1.51313	-1.55788	-1.74335
1.99169	1.62415	2.83647	1.55758	0.33853	1.78699	1.91232	0.680069	1.50631	1.94775	1.11748	1.77488	0.931553	0.657826	0.140246	-0.520339	2.27264	1.94697	1.58438	1.34939	1.99393	3.01817	1.71459	1.556	1.21347	1.303	1.67538	1.31904	2.13102	1.2855	1.14656	1.56493	1.88026	1.17843	1.13551	1.02711	1.01228	2.19402	1.14168	1.82577	2.33712	1.55954	0.948197	1.70724	1.05385	0.635867	0.744775	0.155647	0.906542	0.703605
3.80479	5.006	3.42633	3.43158	4.3579	3.65842	3.6615	4.52996	3.09558	3.32164	3.58259	3.23073	3.13779	3.34607	3.32083	4.16757	3.21234	3.31056	3.99028	3.14458	3.67239	3.94792	3.37027	3.9119	4.00529	3.47684	3.6483	3.99536	3.47773	4.02908	3.55865	3.45226	3.70038	4.24053	3.53173	3.91983	4.38521	3.39987	4.19516	4.60809	3.73592	3.95647	4.04274	2.96802	3.10735	3.82868	3.9461	4.21335	4.23405	3.51261
-0.874518	1.70919	1.87634	-0.251482	1.79046	-1.12601	0.515771	2.17662	-0.592172	0.0418859	1.11728	-0.760724	-2.07304	-3.0277	-0.426024	0.789015	-2.30237	-0.591075	1.02048	-0.212651	0.0848517	0.478495	0.115611	0.157269	0.00581455	-2.85959	-0.0467834	0.687518	-0.811568	0.620408	0.492534	-0.562461	0.867358	0.532415	-0.617301	-0.356624	0.407278	-2.16519	1.03662	1.22335	-0.136976	1.4403	1.81902	-0.12029	-0.0768619	-0.0603638	-0.447066	-0.330273	0.846718	0.633672
1.03871	2.37901	1.02274	1.10851	2.76522	1.27665	1.47793	2.67138	0.492072	0.810014	1.06343	0.163064	0.274583	0.819891	0.333183	1.77613	-0.0339165	0.530865	1.44627	1.15075	1.57251	1.96395	1.13107	1.34154	1.79418	1.07549	0.815042	2.17515	1.15795	1.34693	1.18395	0.889292	1.40211	2.84723	1.39866	0.920528	2.39558	1.89248	1.24838	2.56637	1.40667	1.33976	1.33407	0.0981016	-0.276043	0.883786	1.86187	2.1335	1.17916	0.983553
3.57184	1.84895	1.1006	3.22219	2.55718	3.16849	3.19917	2.13629	3.14104	2.98165	2.68153	2.9423	2.42909	2.88778	2.65775	1.14977	3.17959	3.06667	2.05006	2.96532	2.85127	2.2451	3.09665	3.01737	2.89616	3.4345	3.20829	2.8839	3.07399	2.56125	1.61365	3.54681	2.66457	2.7244	3.17573	1.08602	2.17257	3.32762	2.67467	2.15722	3.19877	3.15359	2.89063	3.27143	3.08864	3.44372	2.60386	2.67962	2.2462	2.40321
1.18433	0.623896	0.713595	1.40918	0.527482	1.58711	1.37259	1.10884	1.14773	1.5021	0.784993	0.888768	0.550483	1.1624	0.549129	0.630095	1.16392	1.22502	-0.260675	0.678516	0.826673	0.809828	0.941916	1.00932	0.831903	1.27045	0.897572	0.987607	1.44508	1.10525	0.398698	1.36692	1.12476	1.01196	1.34985	3.8617	0.0533428	1.14107	0.973391	0.349826	0.798708	1.14494	0.691055	0.829827	0.503746	0.987746	0.851359	0.826179	1.46233	2.56611
1.64948	2.06652	1.75693	1.5952	2.51736	2.00039	2.05252	2.97775	1.2441	1.38257	2.14696	1.40784	1.2339	1.2456	0.903399	2.20986	1.42689	1.3463	1.68444	1.24338	2.20552	2.2588	1.72353	1.97241	1.90049	1.70296	2.07331	2.48831	1.59202	1.72784	0.842459	1.80812	1.91603	2.63317	2.01658	1.3874	1.98	2.02505	2.68505	2.82254	1.96539	2.03851	2.15015	1.31852	1.5823	2.12284	2.10592	1.79546	2.99622	1.97487
1.49403	2.60977	3.7475	2.70287	2.76856	2.3611	3.02435	2.17954	2.39182	2.57001	2.83537	2.4399	2.04099	3.3823	2.49333	2.33834	2.59748	2.15391	3.01702	0.696246	2.60316	3.03727	2.16717	2.43979	3.50161	2.09868	2.54054	2.21205	1.80464	2.21457	3.57622	2.46692	3.12268	3.81082	2.42446	2.91618	3.04655	2.81848	3.13363	2.51226	2.61094	2.3752	2.52163	2.33385	2.70534	2.58945	2.48931	2.53843	2.10836	3.0492
3.13122	3.64829	4.89714	3.15341	3.42838	3.13044	3.0718	3.63812	2.39932	2.58509	2.82012	2.77104	2.17872	2.53831	2.29125	3.2819	2.664	2.73849	3.05769	2.28278	2.85266	3.24541	2.88279	3.08753	2.93196	3.14005	3.2748	3.13562	2.92881	3.02486	2.25617	2.85244	2.94575	3.72935	2.90451	3.20828	3.21013	3.14577	3.5896	4.01441	3.12514	3.28965	3.19054	2.49451	2.47263	2.92516	2.92517	2.98518	3.16224	2.50499
0.913356	1.7061	1.45161	0.856593	1.70033	1.30068	1.22307	1.36781	0.74753	0.795979	1.2298	1.04922	0.705555	1.26909	0.839138	1.62497	0.921117	0.768732	1.55399	0.151595	1.34712	1.84264	0.864731	1.32236	1.38463	1.19273	1.43508	1.76919	0.845189	1.23794	1.76528	1.43593	1.33742	1.985	0.908586	1.31683	1.53204	1.06485	1.34446	1.56279	1.18849	0.946925	1.15418	0.734548	0.767516	1.21982	1.37694	1.79615	1.19959	1.25643
4.52414	3.44031	2.85259	4.83576	4.14869	4.79863	5.01136	3.7863	4.35504	4.24445	4.25457	4.1087	3.58286	4.47833	3.26506	2.79953	4.29501	4.23717	3.59554	3.36169	4.41722	5.13423	4.42833	4.50664	4.48428	4.54183	4.48303	4.50703	4.31854	4.2845	4.05732	4.73438	4.42881	5.34615	4.81378	4.32901	3.52811	4.75057	4.67948	4.05692	4.51043	4.45762	4.27317	3.91637	3.94376	4.49792	4.01996	4.24841	4.14439	4.3782
5.02635	5.55026	4.53591	5.05258	5.26467	5.13091	5.19744	5.63913	4.43198	4.58047	4.71613	4.82857	4.04009	4.64967	4.3314	5.63141	4.65216	4.82234	5.00632	4.33487	4.92482	5.18221	4.75309	5.05577	4.86167	4.88515	5.10545	5.32936	4.89358	5.10319	4.2858	4.94008	5.10422	5.24279	5.18581	4.68184	5.29487	5.05073	5.52232	5.83211	4.97729	5.28243	5.32592	4.48361	4.74524	5.13503	5.06524	5.35508	5.76695	5.46561
-1.5494	-0.407483	-1.30093	-1.66464	-1.27467	-0.422694	-1.06548	-1.04699	-0.901573	-3.74772	-2.85985	-1.6339	-2.58761	-1.91644	-2.20222	-2.58655	-3.09644	-2.41176	-0.578346	-2.12846	-1.26758	-0.958238	-1.06953	-1.1416	-1.07964	-1.50375	-1.04839	-0.993608	-1.08803	-1.59333	-0.305835	-1.16194	-1.01427	-1.46971	-1.31956	-1.06758	-0.936061	-1.08384	-1.03406	-0.844561	-1.20489	-2.20952	-1.36248	-2.68879	-1.25842	-1.44532	-0.979114	-1.24731	-1.01894	-0.732523
-0.831213	1.10987	3.0406	-1.10407	1.11826	-1.30774	-0.209106	2.10354	-1.07668	-0.665573	0.0525122	-2.79771	0.383666	-0.555993	-0.156696	2.35208	-0.928639	-2.54921	0.0449152	-0.247427	0.778092	-0.0189219	-0.501547	0.120665	0.82099	-1.18325	-0.177545	1.36095	-0.699128	0.0868416	-0.0210252	-0.999697	1.01908	1.14976	-1.02642	-0.482609	-0.0209475	-0.722085	1.33812	0.786972	-0.557532	0.621222	1.12418	-0.904996	-0.858043	0.255141	0.774292	0.209002	-0.969383	0.400638
-0.599758	-0.224554	0.00488997	-0.832956	0.337372	-1.19935	-0.836535	-0.48395	-1.05334	-0.738408	0.116019	-1.37229	-0.980869	-1.20347	-1.33626	-0.662402	-2.87613	-1.12995	-0.941812	-2.64494	-1.07691	-1.50291	-0.875607	-1.06801	-0.896205	-1.19265	-0.507726	-0.0804691	-0.788299	-0.41836	-0.738318	-0.857818	-0.817912	-0.704512	-1.21636	-1.27992	-1.57074	-0.675271	-0.456197	-0.755596	-0.580378	0.0312939	0.805365	-0.784745	-0.741415	-0.596421	-0.766814	-0.799287	-1.28239	-0.774453
-0.298627	0.706658	0.0808501	-0.22792	0.256349	-0.224856	-0.0892401	0.388275	-0.579804	-0.384254	-0.0332279	0.122999	-0.235624	-0.260072	-0.640908	0.370016	-0.871611	-0.779975	-0.0183754	-0.704087	-0.264228	-0.00981617	-0.253648	-0.0602055	-0.240868	0.0636587	0.414536	0.434196	-0.333678	0.133766	-0.364736	0.00127411	-0.00698233	0.396985	-0.246333	-0.14296	0.00358677	-0.0225739	0.188154	0.407601	-0.0964737	-0.0144625	0.407998	-0.395884	-0.539895	-0.272446	0.118031	0.0353346	0.225412	-0.37658
0.753959	1.95408	1.54179	0.972803	1.48356	0.61207	0.892199	1.38781	0.561667	0.73689	1.15329	0.96719	1.28264	0.910464	0.530684	1.25405	0.402385	0.311916	1.20979	0.267994	0.868149	1.45924	0.503135	1.0523	1.18256	0.945289	1.11678	1.27231	0.608529	0.782626	0.758658	0.983507	0.97508	1.79898	0.818479	1.20304	1.23571	0.953159	1.4653	1.24627	1.01317	1.0858	1.28324	0.506506	0.509299	1.07783	1.08561	1.3541	1.65458	0.976019
1.02098	1.58913	1.18949	0.594459	1.56972	0.519239	0.796738	1.62513	0.66921	0.751049	1.57339	0.869868	1.08872	2.2097	1.66707	1.42161	1.11707	0.727555	1.84089	0.583834	1.59747	1.34656	0.917746	1.46305	1.55554	1.19712	1.42124	1.63123	1.02832	1.50659	2.64395	1.30715	2.03007	1.70175	0.773758	1.64622	2.00672	0.919134	1.28017	1.23007	1.19039	1.12147	1.65378	0.612864	0.557111	1.0424	1.06599	1.21713	1.10306	1.82442
1.74345	1.93033	3.21584	1.99667	3.20777	2.39311	2.75453	2.54358	1.58121	2.23794	2.29325	1.84682	3.18879	2.25331	1.77764	2.76716	1.51492	1.70315	1.33101	1.20901	1.85157	2.20554	1.81047	2.09506	2.83982	1.59198	1.91471	2.63727	1.51768	2.06958	1.8617	1.66566	2.25836	2.71198	1.99497	0.965858	1.20651	2.20733	3.33177	1.89033	2.57358	2.06865	2.26178	1.58103	1.58123	2.33174	1.95228	1.71972	1.96758	2.0732
2.19903	3.4664	1.86274	2.48158	2.95649	1.93918	1.95024	3.5515	3.41155	2.32697	3.69985	2.59854	2.98868	2.81003	1.21686	1.46767	2.02263	1.94696	1.37043	1.47243	1.48358	1.46806	1.78125	1.72124	1.01441	4.5481	4.05848	4.62141	1.85272	2.11866	1.22552	4.54398	1.96728	3.81696	1.77888	2.51766	2.82087	1.69955	1.62249	2.60117	1.62689	2.2876	2.55576	2.81396	1.39162	3.21247	3.15307	4.96656	2.35736	2.71413
1.88391	2.38401	4.49411	1.47224	4.79061	1.76166	2.42765	3.40336	1.81331	2.57225	4.49214	1.7169	3.45317	2.31797	2.48661	3.67107	1.7459	1.89478	2.22241	1.99022	2.17382	1.76994	1.8227	1.94277	2.85515	1.10717	3.32686	3.69001	1.99422	3.16733	1.91254	1.51609	1.95009	3.70947	2.52098	1.3	1.32475	2.37979	3.70078	3.06955	1.64902	2.55636	4.42566	1.25586	1.45501	2.49543	2.65794	2.61571	1.48715	2.80435
3.41713	3.20131	2.26881	3.92172	3.50993	3.61222	3.6512	2.87724	3.66174	3.52885	3.72659	3.64969	3.03278	3.53467	2.65803	2.31792	3.59812	3.42821	3.00731	2.82034	3.11208	3.39501	3.45338	3.13314	2.94507	4.25002	3.99276	3.98025	3.48364	3.3134	2.76772	4.22506	3.09067	4.17696	3.67475	2.37998	3.16345	3.83175	3.37013	3.18964	3.41963	3.24553	3.32809	3.47842	3.46772	3.92202	3.26958	3.52341	2.89499	3.04725
0.356541	0.81981	1.18031	1.21674	1.01549	1.0575	1.05636	1.67392	1.41026	3.29211	1.16679	1.91307	3.295	-2.61187	0.269284	1.81556	1.65941	1.37209	1.35293	1.03423	1.00055	1.11327	1.38667	0.728016	1.67376	0.604654	0.797617	0.0493822	0.486083	0.747337	6.60662	0.739025	3.41947	2.26731	1.12634	2.56859	0.965413	1.05528	0.854167	1.57325	1.20115	1.09968	1.12589	1.36476	0.993275	0.128626	1.86093	2.43247	-0.228827	0.947523
-2.74045	-0.338204	-3.74252	-0.496058	-3.2424	-0.560033	-1.06708	-1.68424	-2.64169	-0.985281	-2.50678	-0.604727	-1.94701	-3.02595	-0.856669	-3.47501	-1.16187	-2.43047	-2.8582	-2.29581	-2.65552	-2.97531	-3.16195	-1.01843	-3.52276	-0.4723	-0.723348	-0.965316	-2.28865	-2.97863	-3.04315	-0.503392	-1.8908	-3.20865	-0.532264	-0.978347	-0.0962601	-0.714129	-0.784851	-0.536153	-0.901101	-1.31481	-2.78939	-0.947658	-0.764588	-1.03217	-0.753095	-1.26917	-1.3378	-3.03533
0.13004	-0.590398	-1.644	0.570439	0.0916743	0.0713844	0.145336	-0.221369	1.00657	0.49125	0.518488	0.745395	0.251141	1.13974	-1.37128	-0.81683	0.270453	-0.353099	0.832497	-1.00217	-0.261205	1.20564	-0.109626	-0.224734	-0.482052	1.41747	0.849629	0.526984	-0.0298386	0.246239	-2.22482	1.35758	-0.195712	-0.511259	0.317529	-0.947145	-0.273024	0.814606	0.309773	-0.462428	-0.178685	-0.191542	0.211169	0.503301	-0.211755	0.635223	0.0455141	-0.545097	-0.681481	0.302805
-0.496048	-1.18535	-0.631873	-0.719325	-2.56094	-0.671406	-1.01158	-1.34045	-0.884535	-0.671009	-1.57814	-0.909674	-2.0756	-3.05686	-0.554666	-3.21332	-0.607364	-0.53552	-0.810602	-0.355951	-2.65606	-0.0852947	-1.12557	-1.05201	-0.384063	-0.771788	-0.772884	-1.4398	-0.433617	-0.891468	-4.38464	-1.08998	-0.960241	-0.514434	-0.0446124	-0.0580654	-1.21318	-0.850335	-1.46869	-1.82394	-0.547523	-1.24457	-1.49233	-0.836408	-2.57873	-1.01159	-0.885468	-2.12198	-0.317887	-0.767043
2.53405	2.8845	1.92304	2.14481	2.49811	2.17665	2.29593	2.76961	1.88046	2.37954	2.4222	2.61379	1.98992	2.10489	2.4435	2.71628	2.06175	2.06243	2.76999	2.32424	2.3166	2.69902	2.15817	2.43005	2.10681	2.43537	2.44615	2.32105	2.44542	2.56834	2.04223	2.25337	2.20475	2.5597	2.4839	2.51539	3.01009	2.15143	2.50129	2.98824	2.25525	2.5399	2.60342	2.06028	2.32383	2.64826	2.75992	2.99835	2.85653	2.52235
0.652515	0.491484	-2.67372	0.586648	-0.473596	0.673453	1.28192	-0.661351	-0.301633	0.60079	-3.26067	0.109206	-2.23383	-2.64624	0.876396	-2.93771	0.544687	0.0950055	-2.92212	1.78817	2.08253	-2.97486	1.59928	1.61212	1.55894	-0.416535	0.15147	-0.647539	0.848855	1.36705	0.50459	0.40236	1.41623	-0.997992	0.299384	-1.09564	0.221837	1.07313	1.06524	0.752693	0.69247	1.58102	1.81385	0.5904	1.01643	0.322475	1.26398	1.07185	-0.644653	0.515485
-0.222971	0.606341	0.74156	-0.361567	0.170576	-0.361424	-0.146824	0.456469	-1.44166	-0.494393	-0.501012	-0.74436	-1.35435	-0.886122	-0.734559	-0.3635	-0.568324	-0.581458	-0.267343	-1.21066	-0.145675	0.115417	-0.386003	-0.128036	-0.0716	-0.186945	0.0749416	-0.00578785	-0.497309	-0.20497	-0.733531	-0.249761	-0.0519834	0.466545	-0.505992	-0.355838	-0.233292	-0.176749	0.123449	0.13069	0.0447464	-0.167109	0.122797	-0.844252	-1.5923	-0.410517	-0.141838	-0.00143528	0.115254	-0.634078
-0.648459	-0.924699	-1.29955	-0.814931	-0.90766	-0.689209	-0.63803	-0.965565	-0.811863	-1.06726	-0.848776	-0.677188	-1.17501	-1.26212	-0.712739	-1.08317	-0.975993	-0.792908	-1.14557	-0.715096	-0.716681	-0.803699	-0.833567	-0.646409	-0.763212	-0.685861	-0.570246	-0.590751	-0.781508	-0.693681	-1.78201	-0.683882	-0.461278	-0.788518	-0.80935	-1.00096	-0.939713	-0.921821	-0.725256	-0.874211	-0.603806	-0.630244	-0.751163	-1.05622	-0.909058	-0.894352	-0.894279	-0.89186	0.788032	-0.621016
1.78092	0.822192	0.174503	1.65092	1.23931	1.89125	1.47754	0.819954	1.27128	1.50952	1.03409	1.01955	0.232759	1.17602	-0.0592594	0.240908	1.41029	1.6287	0.0899458	0.763972	0.355998	0.492436	1.18818	1.36758	1.11379	1.4717	1.06169	1.44032	1.63659	1.24664	-0.194386	1.7361	1.22248	1.25759	1.29858	0.559145	-0.424918	1.39833	1.18635	0.66599	1.42859	1.46209	1.31267	0.916959	0.585174	1.48628	0.820342	1.16366	1.75545	2.05564
3.61287	2.81322	1.64141	3.45934	2.86632	3.43526	3.33849	2.9361	2.7277	2.8769	3.0181	3.41384	2.38084	3.32848	3.13746	2.67258	3.08023	3.40398	3.2253	3.00824	3.20379	3.25321	3.13873	3.43666	3.18005	3.21419	3.38024	3.00797	3.27576	3.53846	2.4266	2.90884	2.97556	2.84203	3.61973	2.46328	3.17729	3.09393	3.23267	3.11458	3.43497	3.29332	3.27678	3.09867	3.20228	3.5638	3.15047	3.01189	3.45931	3.22843
3.30418	3.34224	3.35852	3.5112	3.7642	3.16959	3.951	3.56837	3.52307	3.70093	4.02016	2.90709	2.75928	3.37122	2.4917	3.02866	3.12916	2.5999	3.65375	2.51974	3.41263	3.61521	3.24862	3.53546	3.28196	3.68486	3.71335	4.05465	3.38546	3.8412	3.78469	3.57616	3.63241	4.45178	3.32875	3.2994	3.54148	3.85616	3.99849	3.90741	3.21739	3.47889	3.69718	3.00519	2.92113	3.84526	3.42577	3.48858	3.26511	3.05952
1.24519	2.85643	2.30907	1.77398	1.9371	0.368486	1.71145	2.43797	2.55188	1.63251	2.67521	2.39187	2.21859	2.47444	1.92728	2.37175	1.68468	1.42237	2.229	1.7343	2.02722	2.97657	1.28724	1.54974	1.98522	2.34005	2.85253	1.73795	1.34788	2.16458	2.77981	2.23853	2.46023	2.61287	2.71887	2.23058	3.19547	2.14446	2.56817	3.17598	1.3539	2.41034	2.72118	1.70652	2.33935	2.28239	2.2033	2.41028	1.66501	2.2031
2.77172	4.40981	5.25132	2.23158	4.18179	2.82955	2.7859	3.90802	2.39798	2.79398	3.36514	1.32404	2.2396	2.09476	2.07203	4.58289	1.79479	2.38955	3.00586	1.8002	2.86554	2.28585	2.18052	3.09217	3.26161	2.27815	2.72646	2.84828	1.92273	2.63416	2.86949	2.10221	2.86655	2.65431	2.89985	3.82921	3.15577	2.86603	3.564	3.97105	2.40752	3.19529	3.10678	1.82782	1.72209	2.66606	3.50871	4.21532	3.22261	2.8982
-2.54277	-0.732147	0.921202	-2.92623	-0.166362	-3.78009	-2.53695	0.0246491	-3.15491	-2.46	-0.368052	-2.64455	-2.74598	-3.25055	-2.33052	1.15955	-2.3922	-2.16751	-2.26466	-2.87469	-2.84104	-1.36932	-2.81664	-2.42577	-0.462153	-3.33196	-1.24691	-0.25313	-2.96318	-0.898727	-3.05852	-3.07579	-0.116906	-0.458031	-2.83667	-0.667036	-1.28818	-3.14667	-0.439491	-0.278265	-2.48365	-0.775131	-0.471408	-2.03075	-2.27854	-2.80848	-0.528523	-0.814864	-2.46053	-0.629695
-2.81745	0.0385623	-0.667014	0.231056	-1.72778	-2.08324	-2.71484	-0.226815	-3.24453	-2.86235	-3.13538	-3.57507	-2.95543	-2.73017	-2.16611	-0.93338	-2.32183	-1.86056	-1.59808	-2.85858	-3.45662	-1.40394	-2.94122	-2.3075	-2.81513	-2.82379	-2.31461	-1.50097	-3.36338	-2.57311	-3.00678	-3.513	-2.92667	-1.91519	-2.60617	1.05295	0.483084	-2.918	-2.37363	0.280624	-2.67004	-2.5155	-2.8859	-2.91491	-2.94234	-2.54454	-2.44037	-0.173625	-0.103225	-0.849634
1.72594	2.94204	2.83831	1.75861	2.81659	1.83101	2.24309	2.93278	1.86814	1.92034	2.56409	0.932636	0.853102	0.327589	0.709512	1.84994	1.86232	1.72686	1.31978	1.15193	1.96911	1.58953	1.60032	1.85685	2.13468	1.83166	2.24389	2.77708	1.76227	2.37687	1.4083	2.40853	2.0988	2.72375	1.94551	1.32598	1.75461	1.63038	2.49358	2.48889	1.72341	2.75219	3.5547	1.39125	1.86176	2.10096	1.87838	3.0772	3.07535	2.32207
0.327237	0.419638	0.567644	0.446396	0.849027	0.289195	0.499373	0.677354	0.399632	0.223403	0.735803	-0.112375	-0.0203161	-0.309958	-0.545798	0.594427	0.307539	0.290785	-0.666049	-0.265744	0.20051	-0.546959	0.0498552	-0.0494413	0.456282	0.356247	0.481778	0.896733	0.0845919	0.60591	-0.99379	0.877419	0.427495	0.626551	0.368398	-0.982238	-0.399273	0.299358	0.623319	0.503376	-0.0756645	0.545891	1.57255	0.00872135	-0.238615	0.461918	0.340122	1.29836	-0.608494	-0.126586
-1.40876	0.274097	2.45854	-1.2995	1.75686	-1.30262	-0.948532	0.477584	-0.99693	-0.62744	1.48458	-1.10704	0.988618	-0.398293	-0.48686	-0.108473	-1.10575	-1.22555	-0.995094	-0.703321	-1.36111	-1.08028	-2.04539	-1.01019	0.219762	-2.45905	-0.250964	0.112788	-1.63596	-0.200553	-1.05723	-1.65571	-2.06355	0.234766	-0.629741	-0.320811	-1.71616	-0.568403	1.11815	0.610838	-1.3801	-0.49586	0.667533	-1.16848	-1.19164	0.406968	-0.863213	-0.760091	-1.90888	-0.32449
2.01813	2.90245	2.95956	1.99658	2.7029	2.4515	2.56689	3.01599	1.69046	1.82494	1.82146	2.13995	0.99439	2.40998	1.78945	2.68645	1.49723	2.02981	2.21408	1.30924	2.04032	2.68065	1.8973	2.11341	2.16085	1.96269	2.81278	2.62382	1.76792	2.42675	2.3375	1.99328	2.43766	3.35902	1.99831	1.8975	2.45531	2.34769	2.83273	3.25749	2.2404	2.52393	2.75737	1.42996	1.51435	2.44352	2.13147	2.25085	2.56255	2.16694
-0.341003	1.72185	2.09895	-0.261145	0.495975	-0.10707	-0.0582323	0.717844	-0.134376	0.0856481	0.0131311	0.231514	0.186468	-0.0690913	0.0308342	1.83105	-0.63838	-0.464562	-0.641063	-0.240068	0.393346	-0.517233	-0.34593	-0.111141	0.215598	0.0469112	0.0872431	0.325342	-0.309654	-0.0718279	-0.336791	0.0332222	0.228347	0.165513	-0.276316	0.0496731	-0.0218573	0.0892491	0.345454	0.426731	-0.138885	0.16251	0.261136	-0.0667734	-0.183882	0.0300083	0.424714	0.486571	-0.351267	-0.0203319
1.67113	1.51508	-0.0456777	1.83321	0.8624	1.60847	1.763	1.19924	1.24909	1.41324	1.21395	1.74911	1.16735	1.3484	1.22411	0.698673	1.53557	1.16552	2.31516	0.762156	2.03291	2.03341	1.56319	1.58116	1.61727	1.17555	1.16819	1.31617	1.68977	1.62787	1.58662	1.01972	1.83073	1.0033	1.57406	1.81404	1.51457	1.62799	1.42286	0.950963	1.97971	1.60912	1.2131	1.50325	1.4	1.38149	1.97848	0.707057	0.515611	1.15874
1.30718	2.20988	1.36725	1.29773	1.78022	1.26326	1.34778	1.89074	1.28987	1.34226	1.60393	1.41426	1.11135	1.32534	1.17964	1.49162	1.13289	1.03528	1.75036	0.988858	1.50414	1.63213	1.11221	1.41287	1.40524	1.90464	1.87456	2.02066	1.19431	1.55004	1.46961	1.92657	1.5165	2.22099	1.2065	1.45106	1.88962	1.5158	1.59417	1.9787	1.42801	1.43752	1.59079	1.23474	1.05834	1.67903	1.75688	2.23969	1.6745	1.30242
0.330683	0.209652	1.49547	0.497175	2.83764	0.612142	0.870314	1.50539	0.281721	1.17101	2.42322	0.341961	1.7577	0.646263	0.489644	2.60679	0.629036	0.131614	0.152522	0.65707	0.786723	-0.197362	-2.65161	0.395946	1.31374	0.434628	1.5412	1.29312	0.735646	1.16146	0.305254	-0.62306	0.261143	1.59448	0.777974	1.09961	-0.39688	0.740324	1.99824	1.81272	0.206648	0.921136	1.83511	-0.474472	0.428603	0.578971	0.996167	0.726276	0.103843	1.08991
0.989128	0.159356	-0.619557	1.07431	0.548031	1.14712	0.847797	0.359606	0.273412	0.58926	0.567595	0.365032	-0.46911	0.759125	0.49353	-0.089118	0.595571	1.03998	0.313755	0.556183	0.613365	0.719063	0.541365	0.559938	0.72873	0.171891	0.323162	0.245127	1.01412	0.492489	0.346749	0.513161	0.800942	0.289056	0.915036	0.624108	1.54343	0.565593	0.654441	0.26844	0.665562	0.739913	0.38905	0.326094	0.348552	0.583361	0.42343	0.591278	0.127535	0.706447
-1.08269	-0.518771	-0.121094	-1.58308	-0.914281	-1.6109	-1.67101	-0.774387	-2.67436	-1.38777	-1.23969	-0.759128	-1.37693	-0.625574	-0.8838	-0.697762	-1.84669	-1.48473	-0.585154	-1.27046	-0.928803	-0.70259	-1.38012	-0.789832	-1.30467	-1.15661	-0.911026	-0.83042	-1.22951	-0.640332	-1.08498	-1.14841	-0.815446	-1.08427	-1.24663	-0.700446	-0.908377	-1.34017	-1.14347	-0.775347	-0.985538	-0.814356	-1.11895	-1.31861	-1.42863	-1.06704	-0.891892	-0.856259	0.209316	-0.935172
-3.28443	0.301658	0.0397115	-0.819536	-0.494906	-1.41729	0.540778	0.326236	-0.783093	0.594181	-0.546741	-0.11833	2.06641	0.145923	-1.0428	0.0337362	-2.36763	0.0811715	-0.453417	-0.452168	-0.0857167	0.195021	-1.55556	-0.0889692	0.877761	-1.03479	-0.796218	-0.39827	-0.999318	-0.226339	-0.45676	-1.16222	-1.03472	0.332932	-1.05209	-0.329857	0.97037	-0.970388	-0.78964	-0.114633	0.186104	-0.931337	-0.48756	-1.32412	-2.91881	-0.775216	-0.396585	0.455503	0.533451	-0.189656
0.111842	1.27811	1.13216	0.811147	0.731637	-0.0914993	-0.0970106	1.35275	0.22808	0.251402	0.646347	0.125566	-0.195854	0.062921	0.28731	1.23608	1.31475	0.131834	0.453507	0.623611	-0.029202	0.840952	0.750756	0.735401	0.481235	-0.0833015	0.14421	0.627268	-0.12354	0.281227	1.18407	-0.218324	0.193051	1.41368	-0.348513	0.205419	1.8488	-0.116798	-0.150776	0.779457	-0.205467	0.273319	0.469696	0.75011	-0.104677	0.046154	0.0482998	1.38011	1.12922	0.716955
-1.20527	0.71931	0.323533	-1.61041	-0.295681	-1.27011	-1.22444	0.727129	-0.40737	-0.420957	-0.0809336	-0.811943	-0.842001	-0.650047	-0.869617	0.506336	-0.718814	-1.29712	-0.269048	-0.93345	-0.699364	0.467754	-1.29438	-0.0463591	-0.727462	-0.828411	-0.694796	-0.175275	-1.34328	-0.189899	-0.393552	-0.871754	-0.406362	1.04701	-1.16036	-0.455378	1.60244	-1.13783	-0.949172	0.204129	-1.49415	-0.458533	-0.146165	-1.23813	-1.11585	-0.472676	-0.4566	0.490318	0.918339	-0.161499
-2.88764	-0.705721	-1.37024	-3.06419	-1.59874	-2.126	-1.91987	-1.6208	-3.12813	-1.816	-2.16095	-2.02697	-1.04421	-1.67144	-1.77915	-1.03704	-1.5044	-1.60478	-1.00634	-2.23278	-1.39914	-1.36541	-1.77173	-1.93726	-1.55749	-2.08535	-1.61626	-1.46057	-2.27073	-1.91759	-1.18688	-2.15081	-1.27343	-1.192	-2.27538	-1.05515	-1.13628	-1.66383	-1.42656	-0.725286	-1.12731	-1.4756	-1.50986	-1.92137	-1.86856	-2.07074	-0.983551	-0.725099	-1.92814	-2.00998
1.19006	3.65584	3.78516	1.31943	1.86539	1.18159	1.04809	2.71984	0.897006	1.31625	1.49511	1.1142	0.812073	1.05531	1.35982	2.51004	0.841745	1.02323	2.1381	1.02343	1.56212	1.97614	0.969958	1.86705	1.3715	0.992151	1.24157	1.53665	1.25138	1.75614	1.56202	1.15103	2.03104	2.051	1.3065	4.18875	2.85084	1.07177	1.9959	2.54724	1.35922	1.85574	1.82761	0.795214	0.946601	1.45219	2.18671	2.14524	3.19695	1.94351
-2.70585	-2.83509	-1.38411	-3.06734	-1.29072	-2.0351	-1.79069	-1.65339	-2.71764	-2.09805	-1.45954	-2.13991	-2.67718	-2.91253	-2.39242	-1.69678	-2.50311	-3.61907	-2.34656	-2.70852	-2.53825	-2.50055	-3.44105	-2.54836	-3.00289	-2.76322	-3.36294	-1.62928	-3.5146	-2.23839	-2.48838	-3.37646	-2.36313	-1.76043	-3.32005	-3.01821	-2.7396	-2.3156	-1.61259	-1.74978	-2.84286	-3.47852	-2.32982	-2.95521	-2.83982	-1.90141	-3.04639	-2.65627	-3.16294	-2.96536
2.00689	-1.17829	-1.18324	1.74983	0.601504	2.00764	1.62529	0.195423	1.75176	1.50945	1.07961	1.66136	0.916372	1.19654	1.05336	-0.690833	2.0607	2.16572	-0.30232	1.62861	0.669364	0.172853	1.92919	1.58027	1.18111	-0.115594	-0.276202	-0.487006	2.4082	1.68305	-0.12423	2.27632	1.32367	1.70811	2.22752	0.201359	0.27879	1.96459	1.40711	-0.164114	2.22195	1.66621	1.09901	2.08502	2.04289	1.93224	0.751998	0.65124	0.577363	1.09722
-0.602194	-0.989724	-0.605298	-0.1363	-0.342028	-0.146001	-0.135915	-0.771718	-0.541233	-0.484882	-0.436049	-0.864797	-1.51295	-0.578555	-1.78959	-0.777432	-0.801254	-0.745674	-0.668488	-1.43046	-0.834373	-0.414469	-0.313312	-0.418629	-0.242216	-0.300815	-0.352752	-0.304834	-0.470824	-0.59192	-1.75698	-0.167248	-0.47744	0.0354586	-0.290137	-0.79419	-0.570275	-0.276398	-0.243792	-0.625437	-0.203069	-0.439633	-0.417453	-0.370786	-0.572704	-0.48698	-0.618762	-0.60846	-0.887184	-0.513948
-1.8259	-2.74276	-0.219737	-3.38319	-0.65699	-2.43004	-2.60294	-3.39062	-2.53692	-2.67376	-0.448899	-3.03976	-0.668717	-2.56156	-1.91587	-0.949568	-2.81965	-1.99843	-1.43459	-2.44898	-2.64066	-2.38889	-3.03082	-1.31742	-2.97561	-3.05901	-1.26787	-1.31029	-2.86252	-0.516315	-1.12009	-2.84735	-2.78452	-1.35834	-2.35915	-3.4967	-1.96309	-3.31127	-1.10205	-1.35132	-3.13676	-2.18384	-0.718245	-1.88099	-0.927591	-2.38354	-3.00044	-1.55651	-2.1425	-1.87176
4.08781	2.90604	2.62157	4.38551	3.68156	4.54689	4.67715	3.62684	3.86638	4.29707	3.87504	4.57392	3.36376	3.63861	3.69877	3.493	3.83235	3.75789	3.48095	3.47262	3.77059	4.28045	4.0415	4.1385	4.16738	4.21192	4.11742	4.21755	3.96403	3.78452	3.82908	4.16666	4.02811	4.25972	4.23981	3.26401	3.71519	4.36708	4.31012	3.39391	4.75964	4.00988	3.68807	4.03012	4.419	4.26734	4.07189	3.73034	3.60636	3.43731
3.21971	3.62008	4.56162	2.96079	3.612	3.13859	3.33006	3.94199	2.19624	2.62199	2.75074	3.1484	1.94514	3.19324	2.93532	3.71147	2.73006	2.60923	3.34696	2.59518	3.28394	3.51291	2.8618	3.21588	2.60013	2.80336	3.36661	3.40248	3.1685	3.26095	2.84209	2.70039	3.2843	4.05275	2.90225	2.84136	3.62535	2.98937	3.59665	3.84659	3.08409	3.2998	3.32827	2.69939	2.75636	3.41419	3.32016	2.84407	3.81954	3.16663
1.23499	1.43229	2.18531	1.28488	0.822896	1.37948	1.25733	0.273407	1.07255	1.35308	0.920019	0.786393	0.558567	0.72052	0.183304	0.438712	0.995507	1.10332	0.00320339	0.429275	0.559817	-0.0124626	1.01548	0.773833	0.928629	0.976802	0.736629	1.07479	1.20531	1.20043	0.333292	1.05773	1.03173	1.5218	1.37883	0.472569	-0.289083	1.20312	1.1487	-0.092977	1.46342	1.10077	0.881523	0.723545	1.21998	1.0496	1.13325	1.05035	1.03857	1.14664
-0.542767	3.61541	2.44378	-0.38419	1.55544	-2.48872	-0.565251	2.03798	-0.168552	-0.561393	-0.182019	-0.174619	-0.142532	0.0666518	0.646792	0.375578	-2.99391	-0.79695	0.764215	-2.63433	1.33124	0.498679	-0.428711	-0.55138	0.0273981	-0.449566	-0.190689	1.69096	-0.41607	-0.0456362	0.0413098	-0.353443	0.331826	0.740488	1.5323	0.000504494	0.253262	-0.247208	-0.337324	2.29605	-0.743619	-0.543103	-0.222213	-1.76352	-0.423129	-0.147665	1.47485	3.65562	-1.29743	0.208644
-0.135666	-0.0882525	0.0906663	-0.719748	-0.223691	-0.722827	-0.395026	-0.231511	-0.689561	0.145699	-0.430564	-0.331366	-0.33802	-0.185112	-0.0291595	0.0398741	-0.961044	-0.971249	0.167617	-0.735427	1.11058	1.68534	-0.233633	-0.0712395	-0.288449	-0.920158	-0.300698	0.154211	-0.281342	0.181317	0.152949	-0.456314	0.320874	0.11944	-0.436763	-0.299583	0.375601	0.112931	0.241829	0.629019	-0.082489	0.947803	0.18659	-2.14748	-0.895357	-0.305861	-0.453247	-0.287515	0.458589	-0.0196357
6.27265	6.73743	3.8592	6.69009	7.14051	6.54421	6.09285	5.65002	5.70772	4.77653	5.19354	6.02404	4.63866	5.6268	3.66728	1.87988	4.97236	4.04394	3.39672	5.33514	5.72291	4.48503	6.49315	5.87673	5.75036	7.15082	6.47996	6.66201	5.70444	5.40509	5.57417	6.92809	6.2168	6.46837	6.39131	3.88895	3.79668	6.23505	6.83634	6.3834	6.00129	6.36189	6.42872	6.08814	5.35416	6.08916	4.90533	6.53318	4.22357	4.36034
-1.7826	1.24838	-0.428537	-2.57749	-0.235032	-2.9789	-0.0156479	-0.986479	-3.01463	0.575454	-2.96735	-0.23025	0.665518	-2.33536	-1.495	-2.26116	-2.35935	-2.21897	-0.246598	0.289503	1.73376	1.94939	-1.86705	4.11202	0.402637	-0.304872	-0.568201	-0.456709	-2.80919	0.794433	1.29024	-3.29007	1.77457	-1.14856	-0.801977	2.40436	1.2803	-2.51885	0.346864	3.95533	-0.538846	0.549781	-0.529406	0.0142183	0.556781	1.17106	0.344353	2.01705	-2.89336	0.946694
0.171156	-1.22201	-2.93547	-0.261318	-0.782959	-0.630302	-0.627444	-1.26743	-0.648629	-0.685805	-0.761847	0.348358	-0.877161	-0.265915	0.379065	-2.0789	-0.648808	-0.251045	-2.60334	0.200898	0.302723	-0.899387	0.082696	0.107147	0.37726	0.284211	0.301017	-0.34667	-0.199518	-0.189689	-3.00743	-0.239244	-0.109818	-0.620965	-0.00692034	-2.15982	-0.880635	-0.49626	-0.289361	-0.665912	-0.273703	0.170849	-0.182713	-0.0895796	-0.171008	0.215332	-0.277406	-0.470757	-1.58156	-0.622761
6.32315	7.7425	5.92525	6.06976	6.56548	6.29428	6.41425	6.59943	5.69015	6.1388	6.2637	5.66594	5.96859	6.06205	5.812	5.99314	5.94373	5.67079	6.53108	5.59599	6.13304	6.71918	6.13803	6.46186	6.2381	5.70045	5.64257	6.56115	6.12445	6.40605	6.34137	5.58656	6.18626	6.23208	6.18562	5.75181	6.65735	6.49215	6.47174	6.95047	5.962	6.38049	6.38594	5.40271	5.53117	6.23407	6.29793	7.49372	5.24544	5.79284
2.93817	3.9735	3.80274	2.66126	3.5024	2.76164	2.9941	3.70439	2.24505	2.8792	2.65551	2.97579	2.25034	2.69767	3.16431	3.44248	2.65575	2.65994	3.44194	2.79506	2.90572	3.34892	2.85373	3.11594	2.77496	3.12941	3.33124	3.56606	2.9446	3.17403	2.99224	2.84758	3.11221	3.40616	2.80859	2.87586	3.78584	2.85475	3.3839	4.18941	2.9661	3.25444	3.24547	2.60799	2.91166	3.13804	3.30631	3.47525	3.37804	2.73134
-1.65685	-0.974391	-0.251181	-1.82751	-1.34779	-1.82339	-1.66777	-0.660058	-2.28157	-1.48047	-2.45087	-1.48472	-2.19034	-1.67385	-1.13088	-0.345038	-1.80061	-1.74588	-1.37354	-1.59399	-1.37984	-1.75581	-1.76178	-1.38475	-1.16312	-1.87138	-1.66595	-1.3291	-1.7589	-1.76138	-1.89436	-1.98806	-1.30939	-1.50521	-1.75415	-1.87609	-1.37512	-1.80389	-1.16824	-0.643884	-1.56108	-1.72141	-1.33213	-1.90356	-1.69654	-1.76133	-1.09183	-1.88941	-2.44449	-1.96239
3.37911	1.51082	0.325792	2.95925	2.69619	2.92849	3.05379	1.81035	2.50684	2.79311	2.21775	2.34853	1.84655	2.88057	2.19128	1.45	2.99072	2.89637	2.21236	2.71246	2.48656	1.70539	2.93295	2.89168	2.77156	2.61713	2.79782	2.35079	2.92452	3.05343	2.71563	2.69814	3.02736	1.96132	2.52833	0.792452	1.96529	3.17706	2.58149	1.98285	2.82938	2.82948	2.58724	2.52497	2.44415	2.64405	1.78868	1.78275	1.99969	2.7904
-0.290179	-0.736173	-3.8647	-0.181883	-0.355008	-3.13635	-1.232	-0.142872	-2.15415	-2.95284	-0.203872	-2.78401	-1.44964	1.22032	0.220922	-0.227763	0.0527601	-0.636638	0.599463	-2.50388	0.32718	-2.80055	-0.259534	-0.0213118	0.539261	-3.16629	-3.04622	-0.515777	-0.303495	0.203242	1.72281	-2.82918	0.640448	-1.0747	-0.650143	-2.11238	-0.325548	-3.29517	-0.989102	-0.0870728	-1.66591	-0.252824	-0.136336	-3.2045	-2.79326	-0.349874	-1.32039	-0.404251	-3.06977	0.846488
-0.349724	0.516235	0.403728	-0.24233	1.70324	-0.187728	0.170248	0.7106	-0.484067	0.655782	0.970697	-0.109958	1.3044	1.24601	0.467731	1.3087	0.0437126	-0.326109	0.459126	-0.265936	0.793885	0.253451	0.291836	0.561854	1.06904	-0.545989	-0.371428	0.386931	-0.38959	0.425259	0.967924	-0.476524	0.605942	0.918534	-0.0212846	0.714804	1.18797	-0.00989199	1.54114	1.95044	0.246751	0.619917	1.25493	-0.396767	0.136049	0.760539	0.250939	0.444616	-1.46053	1.03525
-1.82959	-1.4779	-3.11038	-1.52355	-1.63895	-2.95437	-1.38499	-1.11088	-2.19493	-1.49935	-1.32368	-2.93739	-0.92226	-3.20523	-2.38585	-0.933182	-2.83508	-1.99294	-2.16071	-2.32962	-1.66526	-1.27155	-1.38989	-1.58983	-2.56169	-1.46612	-1.10268	-0.882535	-1.5168	-0.637644	-1.39195	-1.47429	-1.26481	-1.32718	-1.16292	-2.76898	-0.238408	-1.33499	-1.11139	-0.668649	-1.45677	-1.25563	-1.17048	-1.28965	-1.47753	-1.55446	-1.14434	-1.70623	-2.64727	-1.85501
1.31449	1.71085	1.70594	1.18698	1.68173	1.25935	1.35907	1.62198	1.04318	1.15338	1.37781	1.32086	0.842774	1.55326	1.20163	1.60235	1.22772	1.18219	1.75692	0.99732	1.36875	1.66238	1.17939	1.48574	1.42728	1.4956	1.64988	1.53832	1.44429	1.69605	1.54804	1.3362	1.66204	1.73608	1.28364	1.22503	1.85077	1.2951	1.64195	1.69795	1.49333	1.57001	1.60423	0.992901	1.10069	1.36408	1.57377	1.47824	1.54544	1.36167
-2.68954	0.949634	1.99228	-0.494702	0.528135	0.207621	0.251849	-0.771911	-0.878896	0.717556	-0.602639	-0.306806	1.40472	0.0694394	-0.529023	-0.173909	-1.10024	-0.404436	-0.714858	-1.72553	-2.63876	-0.140173	-0.170008	-2.40154	-0.260986	-1.86778	-0.490252	-1.10834	-1.86978	-2.33829	0.596088	-3.27657	-1.34424	-1.03006	-3.02694	0.623306	-2.47575	-1.08949	0.572742	-1.06446	-0.363435	-0.724896	-1.52258	-0.271301	-0.779058	-0.571191	-0.717855	-0.827865	-1.59569	-0.886282
0.780637	0.74705	0.964905	0.598145	0.821084	0.72367	0.881544	0.719162	0.807413	1.04117	0.935512	0.448618	0.646411	0.879661	0.175515	0.615905	0.799469	0.544955	0.699011	0.332408	0.789628	0.862336	0.652697	0.79159	0.555743	0.895915	0.806154	1.11939	0.949688	1.06986	0.541933	1.08079	1.06469	1.18628	0.899188	1.07881	1.39038	0.867252	0.864273	0.885935	0.619948	0.924571	1.06901	0.173285	0.47254	0.808504	1.07445	1.20307	0.87104	1.00572
0.70417	1.77803	2.73678	0.55605	1.5182	1.02114	0.906944	1.35958	0.608124	0.646404	0.959737	0.829736	-1.948	0.730617	-2.72282	-1.36261	0.558716	0.715786	0.884814	0.876194	0.495483	0.972043	0.919795	0.789359	0.707042	0.594005	1.09796	1.02561	0.580786	0.966634	0.136024	0.870287	0.661042	1.10605	1.04245	1.01339	-3.25892	0.825796	1.02318	-2.55272	1.27197	1.00018	1.0687	0.777588	0.783447	0.934258	1.00615	-2.7687	1.28887	-2.63912
-0.255963	-0.00947428	0.23981	-0.0931139	0.166822	-0.544295	-0.0786285	-0.164028	0.073554	0.0251918	0.20724	0.181616	-0.503023	0.0377717	-0.192129	0.162479	-0.237992	-0.0459905	0.229532	-0.242826	-0.136381	0.102562	-0.403324	0.0151978	0.180734	0.200263	0.226912	-0.0443268	-0.516289	0.0947876	0.116095	0.147639	0.213405	-0.0569372	-0.033814	-0.215276	0.188343	-0.0675216	0.468807	0.201583	-0.582226	-0.0558271	-0.0332241	-0.567973	-0.39643	0.0666513	0.00897408	0.4185	-0.143736	0.0128932
0.476536	1.20904	1.67812	0.532037	1.34037	0.822651	0.607271	1.5733	0.376381	0.707868	0.987726	0.271694	0.617875	0.314952	0.462787	1.7909	0.374913	0.242221	0.8663	0.333566	0.71422	0.67607	0.516832	0.519233	0.528554	0.830055	0.696664	1.24771	0.631139	0.91447	0.905159	0.860303	0.728199	1.41025	0.734714	1.14453	0.673155	0.812291	0.82403	1.08131	0.402838	0.700089	0.73935	0.124287	0.434576	0.793336	1.0666	1.35046	0.999423	0.743953
0.131742	0.629133	0.250358	-0.150424	0.170554	-0.0105038	0.0376253	0.409874	-0.773148	0.0256619	-0.21833	-0.0435991	-1.08436	0.0561252	0.254701	0.676479	-0.506812	-0.4209	0.291461	-0.0915117	0.106822	0.10252	-0.23333	0.116729	-0.017662	-0.532853	-0.181491	-0.164894	-0.206635	0.199583	-0.516885	-0.227639	0.336318	0.401258	-0.231391	0.609619	0.0819607	-0.0462337	0.241606	0.297787	0.236841	0.427753	0.105201	-0.253485	-0.0759463	0.132842	0.124955	-0.0675735	0.370704	0.421348
0.0473289	-0.893346	-0.76962	0.158687	-0.237856	0.408851	0.131352	-0.391821	0.103298	0.104554	-0.618494	-0.142243	-0.428871	-0.178785	-0.858054	0.365665	0.0720844	-0.413202	-0.271958	-0.520385	-0.277731	-0.751783	0.241991	-0.157641	-0.264725	-0.37196	-0.256135	0.262415	0.351751	0.181961	-0.755544	0.0449228	-0.237324	-0.152347	0.33146	-0.915266	-1.25823	0.334583	-0.0497389	-1.39871	0.165066	-0.251601	-0.357183	-0.311602	0.0949664	0.037138	-0.573029	-1.26414	-0.309748	-0.455333
2.97337	3.46325	2.54648	2.83736	3.57361	2.98873	3.05686	3.83407	2.1083	2.1262	2.59204	2.83863	1.95126	2.72163	2.40512	3.45037	2.25626	2.31037	3.08564	2.05404	2.69575	3.28094	2.60362	2.89005	2.86717	3.03111	3.3839	3.23206	2.51637	3.01815	2.56988	2.65321	2.96791	3.85077	2.60567	2.9484	3.10355	2.70263	3.59595	4.00636	2.89403	3.37191	3.14751	2.23058	2.34248	3.00684	2.94081	2.99454	3.08778	2.73842
-1.91149	-1.24614	-0.891523	-1.94576	-1.15218	-2.51644	-0.748361	-1.41607	-2.74048	-2.24049	-0.806691	-0.806396	-3.76357	0.227676	-2.51995	-1.62746	-3.23151	-2.18754	-0.879849	-2.54727	-2.37723	-0.568963	-2.11951	-0.63798	-0.450378	-1.80231	-1.14228	-0.861799	-2.90498	-1.12138	-0.619835	-0.562232	-0.567758	-0.805413	-1.4474	-2.58822	-1.15068	-0.902969	-0.349878	-1.17314	-2.21418	-1.10605	-2.47695	-2.85602	-0.76684	-2.84761	-2.96754	-0.836772	-0.825494	-3.29467
3.43134	3.16284	4.10837	3.66326	3.90684	3.87719	4.17692	3.68279	3.80778	3.60457	3.71787	3.68892	3.54923	3.63696	3.18602	3.86497	3.39807	3.2299	4.36803	2.94091	3.15319	4.81755	3.82452	3.94681	4.03479	3.83503	4.02556	4.11492	3.74666	3.80199	2.99568	3.8506	3.65473	3.98299	4.18759	2.92231	4.7109	3.84372	4.20515	3.73886	3.69736	3.78163	3.48514	3.72204	3.95239	4.21158	3.78278	4.51179	3.15609	3.37393
0.959668	0.292505	0.387591	0.809726	0.403119	0.841978	0.859417	0.403787	0.48648	0.769504	0.545791	0.642844	0.016428	0.600058	0.363758	0.202337	0.685452	0.639971	0.532946	0.430627	0.602726	0.754422	0.68403	0.815598	0.601645	0.713473	0.753046	0.611786	0.849978	0.783652	0.306845	0.758346	0.653286	0.613381	0.682317	0.215622	0.697012	0.809628	0.615637	0.209049	0.764426	0.768997	0.755557	0.493448	0.754667	0.808166	0.589927	0.634801	0.714843	0.768425
3.5608	3.1438	2.81829	3.4003	3.16119	3.32795	3.29936	3.48381	3.06059	3.25744	3.26536	2.93282	2.39693	3.04704	2.60605	2.64799	3.25052	3.32915	2.41442	2.95836	2.76901	2.34529	2.88227	2.8789	2.49008	3.23337	3.00109	3.25005	3.47895	3.41936	2.51175	3.39361	3.07606	3.15059	3.2756	3.70421	2.72532	3.15491	3.26221	2.89239	3.12546	3.48872	3.33829	2.92698	3.01687	3.37038	2.92784	2.91868	3.7591	3.42574
1.36065	1.26511	0.772932	0.838015	1.36974	0.757648	0.781704	1.50862	0.182458	0.701852	0.877419	1.50497	0.583814	1.19101	1.3067	1.18831	0.757022	0.715737	1.74472	0.964777	0.927122	1.49602	0.435025	0.831518	1.00315	0.883253	1.58156	0.844321	0.850335	1.29802	0.553734	0.561456	1.08708	1.06779	1.42745	1.51813	1.89824	0.921902	1.57231	1.72254	1.24973	1.82411	1.73282	0.663647	0.726946	1.58089	1.26583	1.54766	1.45972	1.6118
4.49445	6.6621	4.80081	4.65599	5.67867	4.08592	4.66161	5.08413	4.81308	4.94715	5.85595	4.40653	4.82181	5.10729	3.99331	5.01523	4.06735	3.53546	4.35878	3.15239	4.98755	5.30131	4.43726	4.67763	4.76768	5.23603	5.10607	5.38267	3.82447	5.23418	5.56888	5.16845	4.94803	5.9903	4.30025	4.05889	4.71631	5.48585	5.1577	5.1526	4.39379	4.53028	5.19293	3.98243	3.8745	5.44736	5.32628	6.79363	4.18035	5.01584
3.38447	2.05806	2.45272	3.87395	2.79006	3.36115	4.03422	2.39768	2.66815	2.95025	2.66998	2.89693	2.28723	2.69477	2.25157	2.48129	3.07226	3.16148	2.40544	2.11252	2.77394	2.48911	3.06957	3.02705	3.22341	2.82867	3.0681	2.68935	3.28846	2.46626	2.67302	2.72624	2.95486	3.24959	3.91333	2.12658	2.63813	3.68351	3.00894	2.42338	2.85096	2.8187	2.46529	2.78485	3.1142	3.16629	2.71021	2.09215	2.87976	2.63824
1.76715	2.48806	3.19603	1.68123	2.71657	1.7637	1.87463	2.81858	1.59951	1.95542	2.21197	1.67005	1.76884	1.71491	1.64433	3.00669	1.55612	1.67357	2.07305	1.34611	2.15692	1.83401	1.71627	1.90922	1.96497	1.98996	2.05009	2.33339	1.6602	2.10363	1.80413	2.06841	2.11118	2.54686	1.86323	2.30883	1.96376	1.91811	2.28302	2.39669	1.55082	1.94518	2.06813	1.21115	1.34131	1.81723	2.32559	2.66854	2.10528	2.07254
2.6161	3.34708	1.50687	2.28872	3.07377	2.35063	2.56089	3.4295	1.87339	1.80304	2.50363	2.47717	1.74206	2.47249	2.26793	3.06223	2.08216	2.14915	2.81263	2.01383	2.47386	2.86586	2.17194	2.71077	2.52004	2.64226	2.9249	2.8834	2.30055	2.70153	1.6487	2.36272	2.64317	3.28631	2.48857	2.66173	3.13766	2.49461	3.15551	3.57893	2.38416	2.86097	2.79571	2.03823	2.51598	2.76194	2.88726	2.71058	3.13171	2.77521
2.45018	2.97546	2.94207	2.31983	3.1128	2.5036	2.57053	3.29238	1.36401	1.56478	2.42334	2.42657	1.6311	2.4041	2.23602	2.8489	1.94788	2.0696	2.58425	1.70142	2.51552	3.10071	2.03961	2.72948	2.55075	2.60488	2.85159	2.84513	2.03651	2.5022	1.82192	2.40345	2.8585	3.50338	1.88977	2.46155	2.51597	2.18416	3.16888	3.391	2.31221	2.85191	2.86685	1.61037	1.78138	2.43004	2.59285	2.5576	2.98269	2.63944
3.87899	1.07308	0.834918	2.35857	2.71782	2.98167	3.28801	2.67088	3.39864	2.06832	3.3376	2.39661	3.48992	2.70931	1.05809	2.34981	2.82931	3.21733	2.2625	2.66964	0.2871	2.10742	3.25197	2.19922	1.6033	4.64288	4.44979	4.49969	2.30188	2.84949	-0.420358	4.58934	3.13434	2.57945	1.86466	-0.342434	2.22247	2.69818	4.15211	1.21713	2.28671	2.5437	2.02701	2.86736	1.52079	3.02087	0.805852	0.363419	1.1253	2.50775
5.16275	4.93098	3.08973	4.73682	3.53676	4.71501	4.77262	3.83399	4.65099	4.42568	4.2783	4.74442	3.80285	4.59655	3.89618	4.09953	4.48582	4.36177	5.15784	4.05277	4.02993	5.64709	4.62969	4.03856	3.66677	4.96498	4.63266	4.50418	5.35623	4.47508	4.60654	5.07032	4.09109	3.93318	5.25218	6.68483	5.24344	5.09534	4.05766	4.12366	4.60794	4.67412	3.68167	4.90241	4.39224	4.57153	4.51347	3.60604	3.10099	3.94187
2.72419	2.90243	1.51081	2.56085	2.61538	2.73959	2.8119	2.70836	1.67997	2.53891	2.546	2.1594	1.82165	1.77582	1.87185	2.71379	1.47499	1.73331	3.01927	1.809	2.67526	2.84495	2.22269	2.49416	3.01132	2.12792	2.84615	2.65361	2.18281	2.34386	2.24113	1.97675	2.46461	3.52649	2.5508	2.71578	3.9178	2.3992	2.98795	3.28576	2.56627	2.43474	2.42823	1.76975	2.10846	2.52434	3.13146	2.93675	2.63881	2.5673
-0.322061	1.07405	0.749395	-0.753168	0.561126	-0.458598	-0.287632	1.0725	-0.571485	-0.213866	0.235641	-0.432657	0.145016	-0.449973	-0.764123	0.491398	-0.879264	-0.562778	0.109974	-0.828435	-0.12817	0.387349	-0.6094	-0.0156832	-0.0686817	-0.668669	-0.172906	0.33956	-0.577806	-0.137097	-0.0699515	-0.53415	-0.580627	0.297933	-0.429562	0.169987	1.04192	-0.74325	0.0130148	0.463573	-0.76899	-0.126701	0.119068	-0.59425	-0.649228	-0.210256	-0.09235	0.644449	0.953422	0.0747256
2.24548	3.4707	4.56906	2.88993	4.27145	2.70697	3.15018	3.92246	2.24704	2.89145	3.61883	2.06248	2.71918	2.45935	1.92375	4.26283	2.14667	2.07618	1.77636	1.53192	2.8831	2.84948	2.59586	2.4035	3.18321	2.35113	2.68471	3.19187	2.36205	3.12793	2.57341	2.72702	2.62668	4.50527	2.87583	3.44845	1.94491	2.86333	3.27621	3.80619	2.46509	2.59877	2.80566	2.32098	2.33193	2.65298	2.82932	3.48102	3.6301	3.34708
1.31228	0.608713	-3.13629	1.95605	1.04097	1.75311	1.68339	0.798754	2.14527	1.81645	1.76684	1.97956	1.3485	1.43829	1.3447	-0.474977	1.45259	1.34664	-0.0581589	0.872235	1.2724	1.00519	1.04341	1.27683	1.53345	2.52134	2.32027	1.95055	1.33317	1.57288	0.0944352	2.7343	1.37416	1.64477	1.95791	-0.530675	0.447049	1.78828	1.53206	1.21138	1.05806	1.47312	1.82037	1.67831	1.72457	2.10436	1.60446	1.63779	0.61499	1.02357
-0.0137539	0.779692	-0.599854	-0.253182	0.111712	-0.406087	-0.404671	0.651127	-0.77421	-0.311598	-0.394668	0.0440159	-1.07795	0.0409093	-0.249721	0.225075	-0.47543	-0.636752	0.0392094	-0.35557	-0.243424	0.227038	-0.543038	-0.241949	-0.497085	0.118258	0.419951	0.231098	-0.0183935	0.404432	-0.393097	0.150958	0.0884252	0.138771	-0.291954	0.0600729	0.621614	-0.425516	0.140841	0.549143	-0.167366	0.170279	0.226882	-0.313989	-0.280142	0.146149	0.175623	0.53559	0.210426	0.0357499
2.68619	3.15927	3.00591	2.39346	2.96974	2.46694	2.56524	3.2424	2.38035	2.52079	3.01035	2.65514	2.09859	3.07875	2.71568	3.06594	2.51071	2.39185	2.93394	2.30389	2.68266	2.72693	2.33373	2.5594	2.51229	2.9948	2.91819	2.89673	2.70908	2.93832	2.66798	2.78688	2.7637	3.2453	2.75146	3.07331	3.00476	2.52872	2.86069	2.81929	2.68776	2.87346	2.96587	2.42993	2.41977	2.72136	2.84184	2.67185	3.27471	3.06402
-2.07476	3.85711	1.67912	0.313445	2.99102	0.455979	0.544714	3.12054	-3.15617	-2.90333	1.79605	0.227204	1.46098	-1.90243	0.364688	2.72852	0.363222	-2.87365	-1.4603	-3.08605	1.20365	0.326885	-2.58237	0.622643	0.754539	0.509716	-2.58955	2.02968	0.0628033	0.928472	1.4136	1.86969	1.60478	2.00774	-2.24716	0.186234	2.7968	0.850069	1.33712	3.6094	0.371387	0.804059	0.879635	-1.82774	-0.00843	0.898857	1.72547	4.22426	-2.58459	1.1271
0.474573	0.721958	1.22089	0.192364	1.23489	0.87339	0.812002	0.98027	0.157213	0.412137	1.36883	-0.234294	-0.0955849	-0.461649	0.00436687	0.739217	0.46359	0.51377	-0.31183	-0.762598	-0.00852633	-0.0437374	0.714525	0.403728	0.676698	-0.354672	0.783315	0.527246	0.469977	0.981182	-0.00785112	0.224169	0.861356	0.770461	0.7092	-0.736602	-0.206377	0.298855	1.35597	1.23721	0.0963917	1.09403	1.32254	-0.296429	-0.0386043	0.394867	0.423918	0.428879	0.799763	0.793996
-0.650852	-1.80932	-3.14029	-0.0899105	-0.00858927	-1.03602	-1.54718	-0.0175452	-0.257364	-0.956234	-0.519169	-2.20055	-0.586398	-0.836244	-2.47095	-2.10964	-0.494131	-0.729506	-2.39896	-0.479984	-2.55179	-2.38894	-1.08443	-2.63531	-2.2742	-0.329118	-1.16174	-1.28606	-0.587214	-1.01445	-2.80639	0.174596	-2.16275	-0.721542	-2.70136	-2.6353	0.0689964	-0.022306	-0.417043	0.231924	-2.90221	-0.0960026	-0.238402	-0.0363178	-0.578226	-0.239739	-2.08918	-2.84455	-0.769214	-2.64519
1.99159	-0.093329	-0.42739	1.51915	0.134663	1.6718	1.36816	-0.0770926	0.951291	1.11144	0.127165	1.97242	0.307747	1.15014	1.44982	-0.195605	1.18299	1.62089	-0.314799	1.26957	1.22412	0.210165	1.43589	1.3258	1.13593	1.82593	1.67647	0.951239	1.6625	1.25357	-0.18114	1.41564	1.10802	0.765317	1.46571	-0.0313606	0.290428	1.37717	1.22634	0.504967	1.61869	1.35436	1.12185	1.32773	1.25703	1.41178	0.796477	1.03365	0.995841	1.06298
1.31897	1.89283	1.75694	0.942677	2.14237	1.42759	1.34078	2.18148	0.692383	0.668867	1.04222	1.31699	0.468815	1.57673	0.85874	2.11988	1.4381	0.883013	1.61831	1.48197	1.33615	1.85053	1.03006	1.41266	1.33236	1.48819	1.74127	1.86309	1.43038	1.67115	1.17561	1.34823	1.47414	2.61014	1.10161	1.33978	1.76091	1.25822	2.03808	2.44035	1.28222	1.77641	1.72157	0.949158	1.33761	1.78429	1.62284	1.02574	1.74953	1.06642
0.145815	0.899283	0.61852	-0.100359	0.194251	0.101465	0.1956	0.324072	-0.194744	0.187738	-0.267857	0.434608	-0.276927	0.0295119	0.257556	0.616168	-0.0827255	0.220781	0.308374	0.134856	-0.0398345	0.490096	0.0395584	0.3114	-0.138983	0.344585	0.564519	0.53983	0.239236	0.437085	0.211307	0.0271845	0.139316	0.22669	0.254547	-0.162837	1.01414	0.195588	0.363155	0.749251	0.393369	0.556046	0.256667	0.07759	0.507014	0.439503	0.377767	0.256045	0.567936	0.222404
-0.185859	-1.25485	-1.49294	-0.075181	-1.14792	-0.51764	-0.463041	-0.596237	-1.00286	-0.488398	-0.95159	-0.652877	-3.12818	-1.09423	-1.1057	-1.43865	-0.291804	-0.418689	-1.18492	-3.03967	-0.5099	-1.09198	-0.473616	-0.47823	-1.0434	-0.757344	-0.880451	-0.639343	-0.0655737	-0.407776	-1.76197	-1.32939	-1.32848	-0.55185	-0.692673	-1.56255	-0.925397	-0.552498	-1.01778	-1.42879	-0.580614	-0.816813	-0.952307	-0.451628	-0.104054	-0.830472	-0.674133	-1.0094	-0.396662	-1.11804
1.13583	1.98767	1.69983	0.87923	1.66457	0.939234	1.21952	2.00776	0.750873	0.855794	1.14371	0.855229	0.408365	1.04023	1.04773	1.64389	0.695431	0.603415	1.41901	0.868531	1.17546	1.37594	0.919146	1.4564	0.986253	1.24702	1.43378	1.56414	0.99136	1.29058	0.856295	1.02465	1.28942	1.60136	0.981996	1.62716	1.78794	1.02505	1.59574	1.82429	1.21681	1.54565	1.45188	0.800218	0.770671	1.3475	1.38812	1.37592	1.53319	1.12365
0.164373	-0.440308	-2.21429	-0.184286	-0.895114	-0.184608	-0.234084	-0.772907	-0.620205	-0.453281	-0.603009	-0.468433	-0.793939	-0.637322	-0.824285	-1.67088	-0.228896	0.00102663	-1.0024	-0.00311089	-0.825268	-1.0061	0.147861	-0.434661	-0.606722	-0.521642	-0.411371	-0.671659	0.0393915	-0.278725	-1.95409	-0.126047	-0.774024	-1.18029	0.346944	-1.06385	-0.40883	-0.203946	-0.425692	-0.901948	0.477135	-0.264455	-0.574698	-0.480728	-0.475478	0.0404472	-0.400206	-0.449848	-0.919864	-0.428943
-3.25366	-0.606203	-0.891738	-2.7506	-0.540242	-2.34626	-0.959867	-0.330598	-3.38544	-3.02812	-0.276354	-2.74992	-3.51915	-2.72112	-2.82953	-0.644013	-2.43938	-2.78066	-2.11919	-2.14702	-0.867909	-0.59647	-0.992909	-2.15133	-0.531617	-2.28354	-0.972178	-0.768012	-2.5348	-0.815704	-2.86205	-2.27041	-0.826008	-0.87366	-0.93066	-0.388516	-0.565961	-0.659269	-0.531145	-0.330942	-3.8382	-1.11674	-0.3419	-0.389792	-2.05784	-0.884286	-0.330276	-0.0670919	-0.0709648	-0.782221
0.0862665	1.49835	2.83143	0.761908	3.49957	0.837179	1.12962	2.43536	1.08094	1.98865	1.93126	1.42648	3.76644	2.09382	1.74953	2.78877	0.902906	1.02902	0.886599	0.804356	1.06632	1.06164	0.29087	1.3838	2.61688	-0.294147	0.209913	2.0241	0.363924	0.776246	0.636218	-0.266887	0.899338	1.06016	-0.0278754	-0.7318	0.0938072	0.920675	3.1762	1.74756	-0.106234	0.754364	0.861629	0.502251	0.292633	1.82095	0.766562	0.286979	0.331681	1.60209
1.58262	1.34364	-2.6685	1.23012	1.46481	1.04013	1.77308	1.05168	1.91486	1.15943	1.4173	1.14557	2.83147	1.84542	-2.73728	-3.0138	1.38828	1.59291	-3.19446	1.50838	1.44738	0.52643	1.09792	1.44789	1.40217	1.67976	1.05351	2.71462	1.95246	1.70912	1.30902	2.22992	2.18091	0.96686	1.06623	1.91945	0.758216	1.96853	0.337299	-2.99367	0.70187	1.46621	-2.19039	1.40146	1.67238	1.13442	1.83878	-3.23665	1.42613	1.58813
2.37841	0.0140424	1.49175	3.77425	1.70609	3.84265	3.47186	0.586436	3.38558	3.43349	3.39152	2.34696	1.59208	1.78153	0.771913	0.404041	3.51792	3.14646	2.29032	3.70676	3.26018	0.380212	2.93519	2.94729	3.1634	2.50706	2.45106	1.31788	3.16682	2.02982	1.20829	2.88598	2.02858	2.5551	2.52899	1.00045	-0.830581	4.13474	1.92321	1.09296	2.87536	2.00563	1.4103	3.01473	3.46631	3.11323	2.74152	0.213842	1.16926	0.882541
-0.272257	0.526268	0.554862	-0.6067	0.857652	-0.416673	0.226479	0.630979	-0.390272	-0.249493	0.359617	-0.272907	-0.0711355	-0.214214	-0.0690012	0.654873	-0.332226	-0.357709	0.173628	-0.782578	-0.150454	0.288006	-0.294074	-0.0576296	-0.148584	-0.143253	0.14713	0.761569	-0.225993	0.493983	-0.128312	-0.0113535	0.561094	0.823451	-0.684281	-0.509935	0.0487585	-0.353504	0.503265	0.741973	-0.400401	0.502992	0.967942	-0.722907	-0.571434	-0.167961	-0.0721741	0.342887	0.109416	0.37218
2.16965	2.45974	3.31073	2.34596	3.24866	2.07247	2.4097	2.81466	1.93157	2.07596	3.38146	2.32519	2.13757	2.04908	2.35672	3.38699	2.09835	2.00439	2.41838	2.12745	2.30088	2.18642	1.97394	2.22399	2.18541	2.33263	2.62776	2.68088	2.28941	2.70693	1.77259	2.24974	2.14902	2.66301	2.38057	2.18889	2.5416	2.41981	2.72727	2.66725	2.34963	2.47425	3.14227	2.0865	2.18486	2.47093	2.66715	2.60287	1.63372	2.38088
0.120191	1.06329	1.10685	0.164386	0.708443	0.0266466	0.297644	0.716376	0.0961046	0.365099	0.301503	0.385335	0.148725	-0.00394106	0.00860119	1.07937	-0.110809	-0.177009	0.413351	-0.359229	0.294695	0.675048	-0.0529985	0.208605	0.424243	0.545764	0.570665	0.791592	0.0408249	-0.0385351	-0.0485902	0.402064	0.732756	1.09033	0.104001	0.289741	1.02301	0.173344	0.674346	1.15005	0.184586	0.650797	0.367692	-0.10837	0.136444	0.453056	0.86932	1.04326	0.770109	0.26672
2.0293	3.20736	3.03354	1.82058	2.27778	2.03607	2.02938	2.72889	1.52852	1.87758	1.66935	1.89171	1.25532	1.92874	1.87018	2.13643	1.65931	1.69053	2.14652	1.72448	1.78051	2.27787	1.86775	2.22384	1.81104	2.19709	2.34333	2.2417	2.10089	2.34541	1.65623	2.02769	2.10152	2.57124	2.07169	2.09245	2.66243	1.98886	2.31467	2.58988	1.97984	2.16188	2.0768	1.58157	1.73425	2.23866	2.30862	2.13683	2.74987	1.7873
1.12751	0.73773	1.39811	1.07661	0.748946	1.12461	1.02502	0.619455	0.928283	0.862961	0.797394	1.05805	0.441872	1.03739	0.641762	0.267746	0.973225	0.907588	0.717058	0.494356	0.674086	1.04236	0.788449	0.772542	0.229813	1.11874	1.12795	1.10574	0.89353	0.765943	0.47336	1.23921	0.939227	1.62517	0.714648	0.610514	0.404442	1.21031	0.918332	0.568384	1.26886	1.11398	0.907808	0.761159	0.573782	0.812395	0.674052	0.483859	1.04403	0.956187
2.8152	3.13352	0.140234	2.73078	1.67413	2.77817	2.32083	2.13298	2.00942	2.52065	1.7066	2.29564	1.1995	2.08082	1.92155	0.91835	2.39117	2.68478	0.597315	1.9663	1.46272	0.600259	1.91767	1.93177	1.59978	1.91802	1.69356	1.54926	2.62895	2.41413	0.820939	1.83111	1.6703	1.39338	2.60768	2.44846	0.820283	2.02935	2.10057	1.45355	2.22155	2.49665	2.05367	2.37484	2.42732	2.64372	1.68191	1.03715	3.41818	2.83569
3.94733	2.98369	2.37312	3.86076	3.37405	3.95462	3.84663	3.13355	3.18773	3.6594	3.58663	3.27082	2.54548	3.56053	3.11357	2.7034	3.45376	3.69392	2.91705	3.21738	3.54183	3.26381	3.58281	3.47654	3.45501	3.13182	3.34893	3.34079	3.68507	3.75057	2.58272	3.17146	3.09028	3.46402	3.85122	2.58908	2.86141	3.62175	3.39216	3.11712	3.53296	3.4376	3.67349	3.50032	3.6007	4.05784	3.29098	3.20197	4.13246	3.47597
1.73822	4.17748	4.78897	1.4887	4.20708	1.41014	3.00609	4.18967	1.69744	1.99474	3.5832	1.18309	1.46134	1.11681	1.3539	2.97235	1.83731	2.06401	2.73837	1.01384	2.45008	2.53011	1.59069	2.48353	2.64059	1.68098	2.9196	3.66765	1.47113	3.32443	2.21721	2.68828	3.05831	3.70272	1.5043	1.56206	2.83211	1.65949	3.696	4.18931	1.46968	3.86919	4.93977	1.03191	1.52786	2.30648	2.31069	3.30614	3.97995	2.79319
0.729676	-0.294301	0.239691	0.672174	0.455781	0.840632	0.898583	0.432284	0.557138	0.68804	0.449125	0.811636	0.470303	0.457518	0.391441	0.343548	0.572147	0.583465	-0.409685	0.390646	0.396529	0.0640945	0.438072	0.398038	0.232639	1.0442	0.796309	0.931382	0.695839	0.753423	-0.402808	0.890707	0.598252	1.1438	0.39573	-0.37441	-0.508044	0.757824	0.73159	-0.241053	0.760285	0.868601	0.879089	0.480787	0.51335	0.713307	0.1118	0.14759	0.314021	0.416358
[truncated: 1,984 more rows]
[truncated: 52 more columns]
