# Supplementary material for: Spatial proteomics of ovarian cancer precursors delineates early disease changes and drug targets
Source: Mol Syst Biol. 2025 Nov 13;22(1):7–41. doi: 10.1038/s44320-025-00168-4 (PMC12759074; doi:10.1038/s44320-025-00168-4)
Supplement: Supplementary file 20 — Dataset EV14 [file 44320_2025_168_MOESM20_ESM.xlsx]

## Sheet: Legend
Dataset EV14. Student's t-test results used for differential abundance analysis of invasive stroma and NFT stroma samples and visualized in the volcano plot figure 5C.

## Sheet: Dataset EV14
Genes	Protein.Group	Protein.Ids	Protein.Names	First Protein Description	Matrisome category	T-test difference (IC stroma vs. NFTE stroma, log2)	T-test statistic (IC stroma vs. NFTE stroma)	T-test p-value, (-log10)	T-test q-value, (-log10)
IGKV3-7	A0A075B6H7	A0A075B6H7;A0A0C4DH90;A0A0C4DH55;P01624	KV37_HUMAN	Probable non-functional immunoglobulin kappa variable 3-7		0.208597	0.63131	0.275463	0.608937
IGLV4-69	A0A075B6H9	A0A075B6H9	LV469_HUMAN	Immunoglobulin lambda variable 4-69		0.160522	0.476243	0.196754	0.707204
IGLV8-61	A0A075B6I0	A0A075B6I0	LV861_HUMAN	Immunoglobulin lambda variable 8-61		-0.195806	-0.484711	0.200861	0.701554
IGLV7-46	A0A075B6I9	A0A075B6I9	LV746_HUMAN	Immunoglobulin lambda variable 7-46		-0.464559	-2.29192	1.59247	0.0354797
IGLV2-18	A0A075B6J9	A0A075B6J9	LV218_HUMAN	Immunoglobulin lambda variable 2-18		-0.487075	-1.72752	1.04868	0.121146
IGLV3-12	A0A075B6K2	A0A075B6K2	LV312_HUMAN	Immunoglobulin lambda variable 3-12		0.379135	0.967411	0.471912	0.413408
IGLV3-10	A0A075B6K4	A0A075B6K4;A0A075B6K0	LV310_HUMAN	Immunoglobulin lambda variable 3-10		-0.007543	-0.0257638	0.00898039	0.98483
IGLV3-9	A0A075B6K5	A0A075B6K5	LV39_HUMAN	Immunoglobulin lambda variable 3-9		-0.415313	-1.45531	0.821094	0.199161
IGKV2-28;IGKV2D-28	A0A075B6P5;P01615	A0A075B6P5;P01615	KV228_HUMAN;KVD28_HUMAN	Immunoglobulin kappa variable 2-28		-0.426813	-2.15973	1.45667	0.0488593
IGHV3-64	A0A075B6Q5	A0A075B6Q5	HV364_HUMAN	Immunoglobulin heavy variable 3-64		-0.286297	-1.52009	0.873149	0.178349
IGKV2-24;IGKV2D-24	A0A075B6R9;A0A0C4DH68	A0A075B6R9;A0A0C4DH68	KV224_HUMAN;KVD24_HUMAN	Probable non-functional immunoglobulin kappa variable 2D-24		-1.46315	-3.34847	2.84402	0.00163728
IGKV2D-29	A0A075B6S2	A2NJV5;A0A075B6S2	KVD29_HUMAN	Immunoglobulin kappa variable 2D-29		-0.383147	-1.32141	0.71771	0.24736
IGKV1-27	A0A075B6S5	A0A0C4DH69;A0A075B6S5;A0A0C4DH67	KV127_HUMAN	Immunoglobulin kappa variable 1-27		-0.399937	-1.64085	0.973707	0.142858
IGHV3OR16-12	A0A075B7B8	A0A075B7B8	A0A075B7B8_HUMAN	Immunoglobulin heavy variable 3/OR16-12 (non-functional) (Fragment)		-0.43739	-1.79662	1.11011	0.106021
IGHV1OR15-1	A0A075B7D0	A0A075B7D0	A0A075B7D0_HUMAN	Immunoglobulin heavy variable 1/OR15-1 (non-functional) (Fragment)		0.0818687	0.152746	0.0559475	0.910137
IGHV3OR15-7	A0A075B7D8	A0A075B7D8	A0A075B7D8_HUMAN	Immunoglobulin heavy variable 3/OR15-7 (pseudogene) (Fragment)		-0.355353	-1.11203	0.567488	0.340882
IGLV5-45	A0A087WSX0	A0A087WSX0	LV545_HUMAN	Immunoglobulin lambda variable 5-45		-0.523683	-1.86852	1.17559	0.091352
IGKV3D-15	A0A087WSY6	A0A087WSY6	KVD15_HUMAN	Immunoglobulin kappa variable 3D-15		-0.438672	-1.94868	1.25044	0.0774615
IGKV2-40;IGKV2D-40	A0A087WW87;P01614	P01614;A0A087WW87	KV240_HUMAN;KVD40_HUMAN	Immunoglobulin kappa variable 2-40		-0.644962	-3.01889	2.42405	0.00473348
IGKV3-11;IGKV3D-11	A0A0A0MRZ8;P04433	A0A0A0MRZ8;P04433	KV311_HUMAN;KVD11_HUMAN	Immunoglobulin kappa variable 3D-11		-0.103737	-0.414753	0.167585	0.746929
IGHV3-49	A0A0A0MS15	A0A0B4J1V6;A0A0A0MS15	HV349_HUMAN	Immunoglobulin heavy variable 3-49		-0.318101	-1.91966	1.22312	0.0824473
IGLV1-36	A0A0B4J1U3	A0A0B4J1U3	LV136_HUMAN	Immunoglobulin lambda variable 1-36		-0.599892	-1.20983	0.635916	0.295252
IGHV6-1	A0A0B4J1U7	A0A0B4J1U7	HV601_HUMAN	Immunoglobulin heavy variable 6-1		-0.57461	-2.60885	1.93793	0.0155676
IGHV3-15	A0A0B4J1V0	A0A0B4J1V0	HV315_HUMAN	Immunoglobulin heavy variable 3-15		-0.560527	-2.39232	1.69891	0.0274605
IGHV3-74	A0A0B4J1X5	A0A0B4J1X5;A0A075B7E8	HV374_HUMAN	Immunoglobulin heavy variable 3-74		-0.891778	-3.86221	3.54433	0.000336895
IGHV3-43	A0A0B4J1X8	A0A0B4J1X8	HV343_HUMAN	Immunoglobulin heavy variable 3-43		-0.198403	-0.640698	0.280468	0.603061
IGLV9-49	A0A0B4J1Y8	A0A0B4J1Y8	LV949_HUMAN	Immunoglobulin lambda variable 9-49		-0.340287	-0.817683	0.379984	0.496324
IGHV3-72	A0A0B4J1Y9	A0A0B4J1Y9	HV372_HUMAN	Immunoglobulin heavy variable 3-72		-0.828499	-2.53515	1.85515	0.0188465
GATD3;GATD3B	A0A0B4J2D5;P0DPI2	P0DPI2;A0A0B4J2D5	GAL3A_HUMAN;GAL3B_HUMAN	Putative glutamine amidotransferase-like class 1 domain-containing protein 3B, mitochondrial		-0.214716	-2.05064	1.34843	0.0623195
IGKV6-21	A0A0C4DH24	A0A0C4DH24	KV621_HUMAN	Immunoglobulin kappa variable 6-21		-0.545513	-2.02164	1.32025	0.0661041
IGKV3D-20	A0A0C4DH25	A0A0C4DH25	KVD20_HUMAN	Immunoglobulin kappa variable 3D-20		-0.416532	-1.33294	0.726386	0.242933
IGHV1-3	A0A0C4DH29	A0A0C4DH29	HV103_HUMAN	Immunoglobulin heavy variable 1-3		-0.284547	-0.920704	0.44247	0.437648
IGHV1-18	A0A0C4DH31	A0A0C4DH31	HV118_HUMAN	Immunoglobulin heavy variable 1-18		-0.394889	-1.6296	0.964149	0.146014
IGHV4-28	A0A0C4DH34	A0A0C4DH34	HV428_HUMAN	Immunoglobulin heavy variable 4-28		0.10647	0.401792	0.161583	0.755339
IGHV3-35	A0A0C4DH35	A0A0C4DH35	HV335_HUMAN	Probable non-functional immunoglobulin heavy variable 3-35		0.329862	0.95169	0.461925	0.421171
IGHV3-38	A0A0C4DH36	A0A0C4DH36	HV338_HUMAN	Probable non-functional immunoglobulin heavy variable 3-38		-0.626029	-2.4588	1.77094	0.0231078
IGHV5-51	A0A0C4DH38	A0A0C4DH38	HV551_HUMAN	Immunoglobulin heavy variable 5-51		-0.139316	-0.68907	0.30669	0.573171
IGHV4-30-4;IGHV4-34;IGHV4-38-2;IGHV4-39;IGHV4-59;IGHV4-61	A0A0C4DH41;P01824;P01825;P06331;P0DP06;P0DP08	P0DP06;P0DP08;P01824;P01825;A0A0C4DH41;A0A0J9YWU9;P06331	HV434_HUMAN;HV439_HUMAN;HV459_HUMAN;HV461_HUMAN;HVD34_HUMAN;HVD82_HUMAN	Immunoglobulin heavy variable 4-61		-0.0832685	-0.432487	0.17588	0.735564
IGHV2-70D	A0A0C4DH43	A0A0C4DH43	HV70D_HUMAN	Immunoglobulin heavy variable 2-70D		-0.119079	-0.259216	0.098876	0.846343
	A0A0G2JRQ6	A0A0G2JRQ6	A0A0G2JRQ6_HUMAN	Ig-like domain-containing protein (Fragment)		-0.50807	-1.86479	1.17216	0.0920262
IGHV3-64D	A0A0J9YX35	A0A0J9YX35	HV64D_HUMAN	Immunoglobulin heavy variable 3-64D		-0.376254	-2.26715	1.56664	0.0377236
IGHV5-10-1	A0A0J9YXX1	A0A0J9YXX1	HV5X1_HUMAN	Immunoglobulin heavy variable 5-10-1		-0.23417	-0.666624	0.294431	0.586805
	A0A0J9YY99	A0A0J9YY99	A0A0J9YY99_HUMAN	Ig-like domain-containing protein (Fragment)		-0.252887	-0.78515	0.360951	0.517346
RBM47	A0AV96	A0AV96	RBM47_HUMAN	RNA-binding protein 47		1.02505	3.87572	3.56343	0.000331226
IFT56	A0AVF1	A0AVF1	IFT56_HUMAN	Intraflagellar transport protein 56		-0.00465687	-0.0241604	0.00841619	0.985427
TMEM129	A0AVI4	A0AVI4	TM129_HUMAN	E3 ubiquitin-protein ligase TM129		0.00953337	0.039398	0.0138069	0.977723
UBA6	A0AVT1	A0AVT1	UBA6_HUMAN	Ubiquitin-like modifier-activating enzyme 6		0.341611	4.33188	4.22619	5.10774e-05
ESYT2	A0FGR8	A0FGR8	ESYT2_HUMAN	Extended synaptotagmin-2		-0.0990889	-1.29127	0.695227	0.259234
SHTN1	A0MZ66	A0MZ66	SHOT1_HUMAN	Shootin-1		0.41368	1.88109	1.1872	0.0891194
ARHGAP10	A1A4S6	A1A4S6	RHG10_HUMAN	Rho GTPase-activating protein 10		-0.584358	-3.24227	2.70602	0.00231579
ARHGEF37	A1IGU5	A1IGU5	ARH37_HUMAN	Rho guanine nucleotide exchange factor 37		-0.484005	-2.52984	1.84924	0.0190904
MEX3A	A1L020	Q86XN8;Q6ZN04;Q5U5Q3;A1L020	MEX3A_HUMAN	RNA-binding protein MEX3A		0.0967076	0.593682	0.255681	0.63313
ILVBL	A1L0T0	A1L0T0	HACL2_HUMAN	2-hydroxyacyl-CoA lyase 2		-0.0610568	-0.901603	0.43063	0.448592
PLEKHG3	A1L390	A1L390	PKHG3_HUMAN	Pleckstrin homology domain-containing family G member 3		-0.412044	-3.11032	2.53807	0.00356062
SSC5D	A1L4H1	A1L4H1	SRCRL_HUMAN	Soluble scavenger receptor cysteine-rich domain-containing protein SSC5D		-0.99741	-5.9839	6.83897	0
SH3PXD2B	A1X283	A1X283	SPD2B_HUMAN	SH3 and PX domain-containing protein 2B		0.157748	1.61178	0.949081	0.150853
NBAS	A2RRP1	A2RRP1	NBAS_HUMAN	NBAS subunit of NRZ tethering complex		0.159852	3.07628	2.4954	0.00397126
TARS3	A2RTX5	A2RTX5	SYTC2_HUMAN	Threonine--tRNA ligase 2, cytoplasmic		-0.669336	-5.3041	5.73309	0
VWA8	A3KMH1	A3KMH1	VWA8_HUMAN	von Willebrand factor A domain-containing protein 8		-0.11073	-1.38707	0.767695	0.222456
SBNO1	A3KN83	A3KN83	SBNO1_HUMAN	Protein strawberry notch homolog 1		0.0679072	0.503665	0.210134	0.68968
CRPPA	A4D126	A4D126	ISPD_HUMAN	D-ribitol-5-phosphate cytidylyltransferase		-0.190868	-0.539962	0.228199	0.667313
WDR91	A4D1P6	A4D1P6	WDR91_HUMAN	WD repeat-containing protein 91		-0.00775306	-0.136935	0.049851	0.920128
VPS37C	A5D8V6	A5D8V6	VP37C_HUMAN	Vacuolar protein sorting-associated protein 37C		0.186484	2.02367	1.32221	0.0658154
TRAPPC13	A5PLN9	A5PLN9	TPC13_HUMAN	Trafficking protein particle complex subunit 13		0.227747	1.83825	1.14783	0.0974407
CNOT1	A5YKK6	A5YKK6	CNOT1_HUMAN	CCR4-NOT transcription complex subunit 1		0.0310309	0.645505	0.283041	0.60076
CCDC88B	A6NC98	A6NC98	CC88B_HUMAN	Coiled-coil domain-containing protein 88B		0.944527	3.52107	3.07343	0.000955191
MAP1LC3B;MAP1LC3B2	A6NCE7;Q9GZQ8	Q9GZQ8;A6NCE7	MLP3B_HUMAN;MP3B2_HUMAN	Microtubule-associated proteins 1A/1B light chain 3 beta 2		0.232266	0.949709	0.460672	0.422119
PGP	A6NDG6	A6NDG6	PGP_HUMAN	Glycerol-3-phosphate phosphatase		0.37828	3.11022	2.53794	0.00356082
RIMOC1	A6NDU8	A6NDU8	RIMC1_HUMAN	RAB7A-interacting MON1-CCZ1 complex subunit 1		0.200896	1.91125	1.21525	0.0839849
TUBAL3	A6NHL2	A6NHL2	TBAL3_HUMAN	Tubulin alpha chain-like 3		-0.192797	-1.58508	0.926699	0.158476
SMCHD1	A6NHR9	A6NHR9	SMHD1_HUMAN	Structural maintenance of chromosomes flexible hinge domain-containing protein 1		0.0616011	1.05412	0.528418	0.369027
ARHGAP42	A6NI28	A6NI28	RHG42_HUMAN	Rho GTPase-activating protein 42		-0.141584	-0.826969	0.385478	0.490905
UNC119B	A6NIH7	A6NIH7;Q13432	U119B_HUMAN	Protein unc-119 homolog B		-0.325693	-2.57467	1.89936	0.01702
COL6A6	A6NMZ7	A6NMZ7	CO6A6_HUMAN	Collagen alpha-6(VI) chain	Collagens	-0.698669	-3.44345	2.9695	0.00122783
LRRIQ3	A6PVS8	A6PVS8	LRIQ3_HUMAN	Leucine-rich repeat and IQ domain-containing protein 3		0.204217	0.539982	0.228209	0.66742
ZSWIM8	A7E2V4	A7E2V4	ZSWM8_HUMAN	Zinc finger SWIM domain-containing protein 8		0.399455	2.35252	1.65638	0.030525
POM121C	A8CG34	Q96HA1;A6NF01;A8CG34	P121C_HUMAN	Nuclear envelope pore membrane protein POM 121C		-0.069545	-0.313176	0.121898	0.812565
A2ML1	A8K2U0	A8K2U0	A2ML1_HUMAN	Alpha-2-macroglobulin-like protein 1	ECM-regulators	0.649893	1.50159	0.858152	0.184222
PHF20L1	A8MW92	A8MW92	P20L1_HUMAN	PHD finger protein 20-like protein 1		-0.100665	-0.437009	0.17801	0.733282
SNRPG;SNRPGP15	A8MWD9;P62308	A8MWD9;P62308	RUXGL_HUMAN;RUXG_HUMAN	Putative small nuclear ribonucleoprotein G-like protein 15		0.146679	1.69862	1.02342	0.127984
NUDT19	A8MXV4	A8MXV4	NUD19_HUMAN	Acyl-coenzyme A diphosphatase NUDT19		-0.0425577	-0.326711	0.127807	0.804684
MIF4GD	A9UHW6	A9UHW6	MI4GD_HUMAN	MIF4G domain-containing protein		-0.120273	-1.32646	0.721508	0.24542
MYO1G	B0I1T2	B0I1T2	MYO1G_HUMAN	Unconventional myosin-Ig		0.816807	5.77652	6.49836	0
GPR89A;GPR89B	B7ZAQ6;P0CG08	P0CG08;B7ZAQ6	GPHRA_HUMAN;GPHRB_HUMAN	Golgi pH regulator A		-0.206995	-2.31487	1.61654	0.0335254
PPP1R3G	B7ZBB8	B7ZBB8	PP13G_HUMAN	Protein phosphatase 1 regulatory subunit 3G		-0.764496	-2.77216	2.12645	0.00991235
HNRNPCL1;HNRNPCL3;HNRNPCL4	B7ZW38;O60812;P0DMR1	B7ZW38;O60812;P0DMR1	HNRC1_HUMAN;HNRC3_HUMAN;HNRC4_HUMAN	Heterogeneous nuclear ribonucleoprotein C-like 3		-0.0715089	-0.401743	0.161561	0.755251
IGLL5	B9A064	P0CF74;P0DOY2;B9A064;A0M8Q6;P0CG04	IGLL5_HUMAN	Immunoglobulin lambda-like polypeptide 5		-0.411413	-1.8154	1.12707	0.101954
WASH2P;WASH3P	C4AMC7;Q6VEQ5	C4AMC7;A8K0Z3;Q6VEQ5;Q9NQA3;A8MWX3	WASH2_HUMAN;WASH3_HUMAN	Putative WAS protein family homolog 3		0.241033	3.54714	3.10862	0.000886928
MCRIP1	C9JLW8	C9JLW8	MCRI1_HUMAN	Mapk-regulated corepressor-interacting protein 1		-0.0119054	-0.092525	0.0331078	0.947548
CFAP99	D6REC4	D6REC4	CFA99_HUMAN	Cilia- and flagella-associated protein 99		-0.629713	-2.10007	1.39704	0.056
PROB1	E7EW31	E7EW31	PROB1_HUMAN	Proline-rich basic protein 1		-0.0952975	-0.202064	0.0754242	0.883036
NACA	E9PAV3	E9PAV3	NACAM_HUMAN	Nascent polypeptide-associated complex subunit alpha, muscle-specific form		0.216924	2.10514	1.40207	0.0553104
C11orf98	E9PRG8	E9PRG8	CK098_HUMAN	Uncharacterized protein C11orf98		0.306666	2.18824	1.48554	0.0456603
CROCC2	H7BZ55	H7BZ55	CRCC2_HUMAN	Ciliary rootlet coiled-coil protein 2		0.264172	0.59414	0.255919	0.632966
DCDC1	M0R2J8	M0R2J8	DCDC1_HUMAN	Doublecortin domain-containing protein 1		-1.60966	-7.02216	8.57018	0
DNASE2	O00115	O00115	DNS2A_HUMAN	Deoxyribonuclease-2-alpha		1.27889	7.9907	10.1973	0
AGPS	O00116	O00116	ADAS_HUMAN	Alkyldihydroxyacetonephosphate synthase, peroxisomal		0.351376	3.916	3.62056	0.000269576
KIF2A	O00139	O00139	KIF2A_HUMAN	Kinesin-like protein KIF2A		0.386867	4.35625	4.26252	4.50523e-05
TK2	O00142	O00142	KITM_HUMAN	Thymidine kinase 2, mitochondrial		-0.144338	-2.03721	1.33535	0.0640829
DDX39A	O00148	O00148	DX39A_HUMAN	ATP-dependent RNA helicase DDX39A		1.06374	7.7705	9.82789	0
PDLIM1	O00151	O00151	PDLI1_HUMAN	PDZ and LIM domain protein 1		0.162524	1.14645	0.591224	0.324813
ACOT7	O00154	O00154	BACH_HUMAN	Cytosolic acyl coenzyme A thioester hydrolase		0.768172	8.31893	10.7465	0
MYO1C	O00159	O00159	MYO1C_HUMAN	Unconventional myosin-Ic		-0.71093	-5.33895	5.78896	0
MYO1F	O00160	O00160	MYO1F_HUMAN	Unconventional myosin-If		1.21706	6.74843	8.11097	0
SNAP23	O00161	O00161	SNP23_HUMAN	Synaptosomal-associated protein 23		0.284729	4.80105	4.9397	4.00802e-06
HAX1	O00165	O00165	HAX1_HUMAN	HCLS1-associated protein X-1		-0.0877469	-0.967753	0.472131	0.41346
FXYD1	O00168	O00168	PLM_HUMAN	Phospholemman		-1.18764	-4.46827	4.43058	3.04569e-05
AIP	O00170	O00170	AIP_HUMAN	AH receptor-interacting protein		0.131747	1.82021	1.13143	0.100901
GTPBP1	O00178	O00178	GTPB1_HUMAN	GTP-binding protein 1		0.0666345	1.10918	0.565539	0.342066
LGALS9	O00182	O00182	LEG9_HUMAN	Galectin-9	ECM-affiliated	1.16481	6.42649	7.57288	0
STXBP3	O00186	O00186	STXB3_HUMAN	Syntaxin-binding protein 3		-0.231842	-3.24618	2.71105	0.0022929
ARVCF	O00192	O00192	ARVC_HUMAN	Splicing regulator ARVCF		0.0038704	0.0226241	0.00787623	0.986426
SMAP	O00193	O00193	SMAP_HUMAN	Small acidic protein		-0.126761	-0.771091	0.35283	0.525428
AP3B1	O00203	Q13367;O00203	AP3B1_HUMAN	AP-3 complex subunit beta-1		0.165719	2.88551	2.26131	0.00715983
APBB1	O00213	O00213	APBB1_HUMAN	Amyloid beta precursor protein binding family B member 1		-0.720847	-4.50914	4.49234	3.11688e-05
LGALS8	O00214	O00214	LEG8_HUMAN	Galectin-8	ECM-affiliated	0.0719719	0.618451	0.268654	0.617405
NDUFS8	O00217	O00217	NDUS8_HUMAN	NADH dehydrogenase [ubiquinone] iron-sulfur protein 8, mitochondrial		0.0971372	1.16565	0.604625	0.316117
NFKBIE	O00221	O00221	IKBE_HUMAN	NF-kappa-B inhibitor epsilon		0.108401	0.819492	0.381052	0.495259
PSMD11	O00231	O00231	PSD11_HUMAN	26S proteasome non-ATPase regulatory subunit 11		0.320805	4.87225	5.05039	4.21496e-06
PSMD12	O00232	O00232	PSD12_HUMAN	26S proteasome non-ATPase regulatory subunit 12		0.245528	5.2919	5.71357	0
PSMD9	O00233	O00233	PSMD9_HUMAN	26S proteasome non-ATPase regulatory subunit 9		0.280303	3.61037	3.19453	0.000705215
ATOX1	O00244	O00244	ATOX1_HUMAN	Copper transport protein ATOX1		0.38504	4.22251	4.06426	8.37696e-05
MEN1	O00255	O00255	MEN1_HUMAN	Menin		-0.398349	-2.30037	1.60131	0.0346886
GET1	O00258	O00258	GET1_HUMAN	Guided entry of tail-anchored proteins factor 1		0.00903348	0.052293	0.0184193	0.970104
PGRMC1	O00264	O00264	PGRC1_HUMAN	Membrane-associated progesterone receptor component 1		-1.49762	-9.72479	13.0635	0
SUPT5H	O00267	O00267	SPT5H_HUMAN	Transcription elongation factor SPT5		-0.0587406	-0.646734	0.2837	0.600128
TAF4	O00268	O00268	TAF4_HUMAN	Transcription initiation factor TFIID subunit 4		-0.358676	-3.96705	3.69336	0.000227664
DFFA	O00273	O00273	DFFA_HUMAN	DNA fragmentation factor subunit alpha		-0.0875659	-0.971415	0.474468	0.411717
HIP1	O00291	O00291	HIP1_HUMAN	Huntingtin-interacting protein 1		0.207078	2.67928	2.01838	0.0128213
LEFTY2	O00292	O00292;O75610	LFTY2_HUMAN	Left-right determination factor 2	Secreted-factors	-0.596008	-2.32269	1.62478	0.0328762
CLIC1	O00299	O00299	CLIC1_HUMAN	Chloride intracellular channel protein 1		0.557357	5.51086	6.06598	0
EIF3F	O00303	O00303	EIF3F_HUMAN	Eukaryotic translation initiation factor 3 subunit F		0.188228	2.96335	2.35577	0.00560687
PIK3CD	O00329	O00329	PK3CD_HUMAN	Phosphatidylinositol 4,5-bisphosphate 3-kinase catalytic subunit delta isoform		1.04309	6.2471	7.27444	0
PDHX	O00330	O00330	ODPX_HUMAN	Pyruvate dehydrogenase protein X component, mitochondrial		-0.125157	-1.8454	1.15437	0.0959773
MATN2	O00339	O00339	MATN2_HUMAN	Matrilin-2	ECM-glycoproteins	-0.133781	-0.701887	0.31376	0.565434
QSOX1	O00391	O00391	QSOX1_HUMAN	Sulfhydryl oxidase 1		0.0412036	0.340502	0.133885	0.795856
DCTN6	O00399	O00399	DCTN6_HUMAN	Dynactin subunit 6		0.548495	1.86011	1.16785	0.0930105
SLC33A1	O00400	O00400	ACATN_HUMAN	Acetyl-coenzyme A transporter 1		0.00125653	0.00634491	0.00219468	0.996287
WASL	O00401	O00401	WASL_HUMAN	Actin nucleation-promoting factor WASL		-0.0860051	-0.677669	0.300443	0.579823
PDE2A	O00408	O00408	PDE2A_HUMAN	cGMP-dependent 3',5'-cyclic phosphodiesterase		-0.679601	-4.44645	4.39771	4.34057e-05
IPO5	O00410	O00410	IPO5_HUMAN	Importin-5		0.272894	3.19255	2.64226	0.00274799
EEF2K	O00418	O00418	EF2K_HUMAN	Eukaryotic elongation factor 2 kinase		0.0714761	0.344395	0.135611	0.793181
SAP18	O00422	O00422	SAP18_HUMAN	Histone deacetylase complex subunit SAP18		-0.12304	-1.51954	0.872699	0.178483
EML1	O00423	O00423	EMAL1_HUMAN	Echinoderm microtubule-associated protein-like 1		-0.335179	-3.25168	2.71814	0.00226712
DNM1L	O00429	O00429	DNM1L_HUMAN	Dynamin-1-like protein		-0.0148819	-0.169445	0.0624638	0.899222
RTCA	O00442	O00442	RTCA_HUMAN	RNA 3'-terminal phosphate cyclase		0.344517	6.53381	7.75194	0
PIK3C2A	O00443	O00443	P3C2A_HUMAN	Phosphatidylinositol 4-phosphate 3-kinase C2 domain-containing subunit alpha		-0.0526377	-0.823103	0.383188	0.493347
LST1	O00453	O00453	LST1_HUMAN	Leukocyte-specific transcript 1 protein		0.886072	3.57965	3.15269	0.000786153
PIK3R2	O00459	O00459	P85B_HUMAN	Phosphatidylinositol 3-kinase regulatory subunit beta		0.0717945	0.638626	0.279361	0.604041
GOLIM4	O00461	O00461	GOLI4_HUMAN	Golgi integral membrane protein 4		0.325908	2.56624	1.8899	0.0173732
MANBA	O00462	O00462	MANBA_HUMAN	Beta-mannosidase		0.0592799	0.328121	0.128426	0.803872
AGRN	O00468	O00468	AGRIN_HUMAN	Agrin	ECM-glycoproteins	0.103722	0.815493	0.378692	0.497606
PLOD2	O00469	O00469	PLOD2_HUMAN	Procollagen-lysine,2-oxoglutarate 5-dioxygenase 2	ECM-regulators	1.68009	5.4526	5.97183	0
MEIS1	O00470	O00470;O14770	MEIS1_HUMAN	Homeobox protein Meis1		-1.23292	-8.34945	10.7975	0
EXOC5	O00471	O00471	EXOC5_HUMAN	Exocyst complex component 5		0.0231669	0.285006	0.109772	0.830937
BTN3A3	O00478	O00478	BT3A3_HUMAN	Butyrophilin subfamily 3 member A3		-0.353194	-3.7676	3.41153	0.000414797
HMGN4	O00479	O00479;P05204	HMGN4_HUMAN	High mobility group nucleosome-binding domain-containing protein 4		-0.13371	-0.757429	0.344997	0.533303
NDUFA4	O00483	O00483	NDUA4_HUMAN	Cytochrome c oxidase subunit NDUFA4		-0.0152284	-0.11981	0.0433286	0.930953
PSMD14	O00487	O00487	PSDE_HUMAN	26S proteasome non-ATPase regulatory subunit 14		0.32855	4.83027	4.98506	4.07747e-06
BIN1	O00499	O00499	BIN1_HUMAN	Myc box-dependent-interacting protein 1		-0.624071	-6.91417	8.38887	0
KPNA3	O00505	O00505	IMA4_HUMAN	Importin subunit alpha-4		0.496697	3.54502	3.10575	0.000889378
STK25	O00506	O00506	STK25_HUMAN	Serine/threonine-protein kinase 25		0.311035	1.61327	0.950337	0.150535
KRIT1	O00522	O00522	KRIT1_HUMAN	Krev interaction trapped protein 1		0.219536	2.11111	1.408	0.0545329
CHL1	O00533	O00533	NCHL1_HUMAN	Neural cell adhesion molecule L1-like protein		0.685413	3.07891	2.49868	0.00393165
VWA5A	O00534	O00534	VMA5A_HUMAN	von Willebrand factor A domain-containing protein 5A	ECM-glycoproteins	0.304944	2.84269	2.20998	0.00808183
PES1	O00541	O00541	PESC_HUMAN	Pescadillo homolog		0.202993	2.45379	1.76547	0.0234079
SDCBP	O00560	O00560	SDCB1_HUMAN	Syntenin-1		0.493835	4.84873	5.01376	4.1365e-06
PITPNM1	O00562	O00562	PITM1_HUMAN	Membrane-associated phosphatidylinositol transfer protein 1		0.583493	3.78089	3.43009	0.000404385
NOP56	O00567	O00567	NOP56_HUMAN	Nucleolar protein 56		-0.0162541	-0.185793	0.0689209	0.89165
DDX3X	O00571	O15523;O00571	DDX3X_HUMAN	ATP-dependent RNA helicase DDX3X		0.516735	6.20363	7.2023	0
RNASET2	O00584	O00584	RNT2_HUMAN	Ribonuclease T2		0.524709	2.88526	2.261	0.00716688
PODXL	O00592	O00592	PODXL_HUMAN	Podocalyxin		-0.293373	-1.62302	0.958574	0.147839
PIR	O00625	O00625	PIR_HUMAN	Pirin		-0.601182	-5.7452	6.44714	0
KPNA4	O00629	O00629	IMA3_HUMAN	Importin subunit alpha-3		0.174207	2.43916	1.74953	0.0242779
NTN3	O00634	O00634	NET3_HUMAN	Netrin-3	ECM-glycoproteins	-1.1006	-4.53739	4.53515	3.18302e-05
TRIM38	O00635	O00635	TRI38_HUMAN	E3 ubiquitin-protein ligase TRIM38		0.175457	1.4009	0.778395	0.21748
NFIB	O00712	O00712	NFIB_HUMAN	Nuclear factor 1 B-type		-0.621587	-6.53556	7.75487	0
PPP6C	O00743	O00743	PPP6_HUMAN	Serine/threonine-protein phosphatase 6 catalytic subunit		0.265781	1.00764	0.49783	0.392569
PIK3C2B	O00750	O00750	P3C2B_HUMAN	Phosphatidylinositol 4-phosphate 3-kinase C2 domain-containing subunit beta		0.0193017	0.105306	0.0378694	0.939623
MAN2B1	O00754	O00754	MA2B1_HUMAN	Lysosomal alpha-mannosidase		0.974487	11.496	15.8606	0
PDXK	O00764	O00764	PDXK_HUMAN	Pyridoxal kinase		0.333668	3.59379	3.17192	0.000750562
PLPP1	O14494	O14494	PLPP1_HUMAN	Phospholipid phosphatase 1		-0.226039	-1.34845	0.738127	0.237079
PLPP3	O14495	O14495	PLPP3_HUMAN	Phospholipid phosphatase 3		-1.08645	-7.68137	9.67819	0
ARID1A	O14497	O14497	ARI1A_HUMAN	AT-rich interactive domain-containing protein 1A		-0.015352	-0.207694	0.0776921	0.879915
ISLR	O14498	O14498	ISLR_HUMAN	Immunoglobulin superfamily containing leucine-rich repeat protein		-0.111878	-0.45717	0.187584	0.719772
C2CD2L	O14523	O14523	C2C2L_HUMAN	Phospholipid transfer protein C2CD2L		0.416716	2.85808	2.22838	0.00769699
NEMP1	O14524	O14524	NEMP1_HUMAN	Nuclear envelope integral membrane protein 1		-0.288169	-1.33549	0.728314	0.241942
TXNDC9	O14530	O14530	TXND9_HUMAN	Thioredoxin domain-containing protein 9		0.38165	3.61409	3.19961	0.00069397
DPYSL4	O14531	O14531	DPYL4_HUMAN	Dihydropyrimidinase-related protein 4		-0.152185	-0.946938	0.458922	0.423511
TRAFD1	O14545	O14545	TRAD1_HUMAN	TRAF-type zinc finger domain-containing protein 1		0.770136	5.27437	5.68553	0
COX7A2L	O14548	O14548	COX7R_HUMAN	Cytochrome c oxidase subunit 7A-related protein, mitochondrial		0.467297	1.40872	0.784478	0.214984
HSPB6	O14558	O14558	HSPB6_HUMAN	Heat shock protein beta-6		-2.25321	-6.09571	7.02357	0
NDUFAB1	O14561	O14561	ACPM_HUMAN	Acyl carrier protein, mitochondrial		-0.0665632	-0.312459	0.121586	0.813055
UBFD1	O14562	O14562	UBFD1_HUMAN	Ubiquitin domain-containing protein UBFD1		0.349534	2.09664	1.39365	0.0564371
CIT	O14578	O14578	CTRO_HUMAN	Citron Rho-interacting kinase		0.191755	0.725906	0.327149	0.551756
COPE	O14579	O14579	COPE_HUMAN	Coatomer subunit epsilon		0.535961	5.34597	5.80023	0
AP3D1	O14617	O14617	AP3D1_HUMAN	AP-3 complex subunit delta-1		0.117684	2.41389	1.72214	0.0259546
CCS	O14618	O14618	CCS_HUMAN	Copper chaperone for superoxide dismutase		0.0675139	0.686245	0.305138	0.574787
ABLIM1	O14639	O14639	ABLM1_HUMAN	Actin-binding LIM protein 1		-0.115682	-0.95949	0.46687	0.41737
CHD2	O14647	Q8TD26;Q9HCK8;Q3L8U1;O14647;Q9P2D1;O14646	CHD2_HUMAN	Chromodomain-helicase-DNA-binding protein 2		-0.265621	-2.67966	2.01882	0.0128015
TOR1A	O14656	O14656	TOR1A_HUMAN	Torsin-1A		0.287008	4.83614	4.99417	4.08998e-06
TOR1B	O14657	O14657	TOR1B_HUMAN	Torsin-1B		0.893174	4.05594	3.82121	0.000164689
STX16	O14662	O14662	STX16_HUMAN	Syntaxin-16		0.635411	5.98611	6.84262	0
ADAM10	O14672	O14672	ADA10_HUMAN	Disintegrin and metalloproteinase domain-containing protein 10	ECM-regulators	-0.00929704	-0.127427	0.0462194	0.925827
ABCD4	O14678	O14678	ABCD4_HUMAN	Lysosomal cobalamin transporter ABCD4		0.4491	2.47019	1.7834	0.0224142
EI24	O14681	O14681	EI24_HUMAN	Etoposide-induced protein 2.4 homolog		-0.195985	-0.951067	0.461531	0.421418
APAF1	O14727	O14727	APAF_HUMAN	Apoptotic protease-activating factor 1		0.520975	2.26068	1.55992	0.0382662
IMPA2	O14732	O14732	IMPA2_HUMAN	Inositol monophosphatase 2		0.0627473	0.356531	0.14102	0.78577
MAP2K7	O14733	O14733	MP2K7_HUMAN	Dual specificity mitogen-activated protein kinase kinase 7		0.218073	0.936853	0.452572	0.42876
ACOT8	O14734	O14734	ACOT8_HUMAN	Acyl-coenzyme A thioesterase 8		0.710721	3.94802	3.66618	0.000249017
CDIPT	O14735	O14735	CDIPT_HUMAN	CDP-diacylglycerol--inositol 3-phosphatidyltransferase		-0.362063	-4.49603	4.47251	3.09013e-05
PDCD5	O14737	O14737	PDCD5_HUMAN	Programmed cell death protein 5		0.137153	1.36174	0.748253	0.232231
PRMT5	O14744	O14744	ANM5_HUMAN	Protein arginine N-methyltransferase 5		0.356788	4.53342	4.52914	3.17181e-05
NHERF1	O14745	O14745	NHRF1_HUMAN	Na(+)/H(+) exchange regulatory cofactor NHE-RF1		0.27892	1.6998	1.02445	0.127686
FPGT	O14772	O14772	FPGT_HUMAN	Fucose-1-phosphate guanylyltransferase		0.101426	0.477566	0.197395	0.706507
TPP1	O14773	O14773	TPP1_HUMAN	Tripeptidyl-peptidase 1		0.57171	5.5455	6.12208	0
TCERG1	O14776	O14776	TCRG1_HUMAN	Transcription elongation regulator 1		-0.00832867	-0.120114	0.0434434	0.930995
NRP1	O14786	O14786	NRP1_HUMAN	Neuropilin-1		-0.289121	-2.95238	2.34236	0.0057793
TNPO2	O14787	O14787	TNPO2_HUMAN	Transportin-2		-0.273801	-3.15915	2.59976	0.00306747
APOL1	O14791	O14791	APOL1_HUMAN	Apolipoprotein L1		-0.0799331	-0.371742	0.147862	0.776402
UNC13B	O14795	O14795	UN13B_HUMAN	Protein unc-13 homolog B		-0.259466	-1.92119	1.22456	0.0821678
POLR3A	O14802	O14802	RPC1_HUMAN	DNA-directed RNA polymerase III subunit RPC1		-0.394803	-1.83031	1.14061	0.0990169
PSMA7	O14818	O14818	PSA7_HUMAN	Proteasome subunit alpha type-7		0.317124	4.7538	4.86658	7.8125e-06
SCAMP3	O14828	O14828	SCAM3_HUMAN	Secretory carrier-associated membrane protein 3		0.397226	4.01736	3.76555	0.000199454
OPLAH	O14841	O14841	OPLA_HUMAN	5-oxoprolinase		0.254254	2.95012	2.3396	0.00580948
BCKDK	O14874	O14874	BCKD_HUMAN	[3-methyl-2-oxobutanoate dehydrogenase [lipoamide]] kinase, mitochondrial		0.347156	1.82816	1.13864	0.0993799
IFIT3	O14879	O14879	IFIT3_HUMAN	Interferon-induced protein with tetratricopeptide repeats 3		0.704187	5.2744	5.68558	0
MGST3	O14880	O14880	MGST3_HUMAN	Glutathione S-transferase 3, mitochondrial		-0.370616	-4.75643	4.87065	7.82014e-06
IRF6	O14896	O14896	IRF6_HUMAN	Interferon regulatory factor 6		-0.548475	-2.49299	1.80846	0.0210538
TAX1BP3	O14907	O14907	TX1B3_HUMAN	Tax1-binding protein 3		-0.0663386	-0.519413	0.217922	0.679617
GIPC1	O14908	Q8TF64;O14908	GIPC1_HUMAN	PDZ domain-containing protein GIPC1		0.17902	2.1611	1.45806	0.0487232
IKBKB	O14920	O14920	IKKB_HUMAN	Inhibitor of nuclear factor kappa-B kinase subunit beta		0.0684163	1.15195	0.595053	0.322208
TIMM23	O14925	O14925;Q5SRD1	TIM23_HUMAN	Mitochondrial import inner membrane translocase subunit Tim23		-0.016297	-0.090254	0.0322666	0.948381
HAT1	O14929	O14929	HAT1_HUMAN	Histone acetyltransferase type B catalytic subunit		0.344027	3.034	2.44276	0.00454249
UBE2L6	O14933	O14933	UB2L6_HUMAN	Ubiquitin/ISG15-conjugating enzyme E2 L6		0.575698	4.62757	4.67253	1.83655e-05
CASK	O14936	O14936	CSKP_HUMAN	Peripheral plasma membrane protein CASK		0.0934811	1.2115	0.63711	0.294574
PLD2	O14939	O14939	PLD2_HUMAN	Phospholipase D2		-0.432313	-3.48826	3.02935	0.00105933
UQCRQ	O14949	O14949	QCR8_HUMAN	Cytochrome b-c1 complex subunit 8		-0.120366	-1.31134	0.710168	0.250947
MYL12A;MYL12B	O14950;P19105	P19105;O14950	ML12A_HUMAN;ML12B_HUMAN	Myosin regulatory light chain 12B		0.298275	2.7199	2.06537	0.0113695
HGS	O14964	O14964	HGS_HUMAN	Hepatocyte growth factor-regulated tyrosine kinase substrate		-0.00437235	-0.092629	0.0331464	0.947603
RAB29	O14966	O14966	RAB7L_HUMAN	Ras-related protein Rab-7L1		-0.370515	-1.9436	1.24564	0.0783251
VPS26C	O14972	O14972	VP26C_HUMAN	Vacuolar protein sorting-associated protein 26C		0.166954	1.57883	0.921495	0.160233
PPP1R12A	O14974	O14974	MYPT1_HUMAN	Protein phosphatase 1 regulatory subunit 12A		-0.261388	-1.61186	0.949148	0.150866
GAK	O14976	O14976	GAK_HUMAN	Cyclin-G-associated kinase		0.306529	5.30107	5.72824	0
HNRNPDL	O14979	O14979	HNRDL_HUMAN	Heterogeneous nuclear ribonucleoprotein D-like		-0.238755	-2.20733	1.50499	0.0435522
XPO1	O14980	O14980	XPO1_HUMAN	Exportin-1		-0.0602641	-1.10036	0.559528	0.346074
BTAF1	O14981	O14981	BTAF1_HUMAN	TATA-binding protein-associated factor 172		-0.0317868	-0.215879	0.081006	0.874655
SPTBN2	O15020	O15020	SPTN2_HUMAN	Spectrin beta chain, non-erythrocytic 2		-0.449824	-1.82275	1.13373	0.100392
SEC16A	O15027	O15027	SC16A_HUMAN	Protein transport protein Sec16A		0.263688	3.60306	3.18456	0.000729531
PLXNB2	O15031	O15031	PLXB2_HUMAN	Plexin-B2	ECM-affiliated	-0.112517	-1.85461	1.1628	0.0939847
KHNYN	O15037	O15037	KHNYN_HUMAN	Protein KHNYN		0.338045	1.55398	0.90091	0.167745
TECPR2	O15040	O15040	TCPR2_HUMAN	Tectonin beta-propeller repeat-containing protein 2		-0.214343	-1.88343	1.18937	0.0887381
U2SURP	O15042	O15042	SR140_HUMAN	U2 snRNP-associated SURP motif-containing protein		0.171011	2.35961	1.66391	0.029967
SETD1A	O15047	O15047	SET1A_HUMAN	Histone-lysine N-methyltransferase SETD1A		-0.453023	-4.44166	4.3905	4.31535e-05
TRANK1	O15050	O15050	TRNK1_HUMAN	TPR and ankyrin repeat-containing protein 1		-0.315866	-1.17255	0.609474	0.312545
SYNM	O15061	O15061	SYNEM_HUMAN	Synemin		-1.15299	-3.55326	3.1169	0.000870237
PFAS	O15067	O15067	PUR4_HUMAN	Phosphoribosylformylglycinamidine synthase		0.185355	2.39169	1.69823	0.0274752
DCLK1	O15075	O15075	DCLK1_HUMAN	Serine/threonine-protein kinase DCLK1		0.841523	2.91648	2.29872	0.00650486
ANKRD28	O15084	Q8N8A2;O15084	ANR28_HUMAN	Serine/threonine-protein phosphatase 6 regulatory ankyrin repeat subunit A		0.562482	4.00105	3.74211	0.000205544
ARHGEF11	O15085	O15085	ARHGB_HUMAN	Rho guanine nucleotide exchange factor 11		0.139701	1.02415	0.508616	0.384675
PRORP	O15091	O15091	MRPP3_HUMAN	Mitochondrial ribonuclease P catalytic subunit		0.20776	1.63921	0.972307	0.143368
CHUK	O15111	O15111	IKKA_HUMAN	Inhibitor of nuclear factor kappa-B kinase subunit alpha		0.457226	4.74361	4.85084	7.77454e-06
LSM1	O15116	O15116	LSM1_HUMAN	U6 snRNA-associated Sm-like protein LSm1		0.0278366	0.433223	0.176226	0.735192
FYB1	O15117	O15117	FYB1_HUMAN	FYN-binding protein 1		1.62269	7.412	9.22543	0
NPC1	O15118	O15118	NPC1_HUMAN	NPC intracellular cholesterol transporter 1		0.175339	1.45822	0.823403	0.19835
DEGS1	O15121	O15121	DEGS1_HUMAN	Sphingolipid delta(4)-desaturase DES1		0.335926	2.48385	1.79839	0.0216506
SCAMP1	O15126	O15126	SCAM1_HUMAN	Secretory carrier-associated membrane protein 1		-0.0196249	-0.130147	0.0472557	0.923839
SCAMP2	O15127	O15127	SCAM2_HUMAN	Secretory carrier-associated membrane protein 2		0.672455	6.25041	7.27993	0
ARPC1B	O15143	O15143	ARC1B_HUMAN	Actin-related protein 2/3 complex subunit 1B		1.20806	9.88195	13.3178	0
ARPC2	O15144	O15144	ARPC2_HUMAN	Actin-related protein 2/3 complex subunit 2		0.712968	9.62562	12.9024	0
ARPC3	O15145	O15145	ARPC3_HUMAN	Actin-related protein 2/3 complex subunit 3		0.864248	8.34027	10.7821	0
BET1	O15155	O15155	BET1_HUMAN	BET1 homolog		-0.00169545	-0.00854781	0.00295924	0.994593
POLR1C	O15160	O15160	RPAC1_HUMAN	DNA-directed RNA polymerases I and III subunit RPAC1		0.0714775	0.934553	0.451128	0.430185
PGRMC2	O15173	O15173	PGRC2_HUMAN	Membrane-associated progesterone receptor component 2		-0.20075	-2.97163	2.36589	0.00547732
RGL2	O15211	O15211	RGL2_HUMAN	Ral guanine nucleotide dissociation stimulator-like 2		0.0508617	0.540096	0.228266	0.667442
PFDN6	O15212	O15212	PFD6_HUMAN	Prefoldin subunit 6		-0.0639256	-0.879032	0.416788	0.461962
WDR46	O15213	O15213	WDR46_HUMAN	WD repeat-containing protein 46		0.264754	0.829174	0.386787	0.489902
LAMA5	O15230	O15230	LAMA5_HUMAN	Laminin subunit alpha-5	ECM-glycoproteins	-1.03135	-3.91757	3.62279	0.00026718
ZNF185	O15231	O15231	ZN185_HUMAN	Zinc finger protein 185		-0.815505	-4.68654	4.76294	1.50659e-05
CLIC2	O15247	O15247	CLIC2_HUMAN	Chloride intracellular channel protein 2		-0.553177	-4.2274	4.07146	7.80195e-05
ACOX3	O15254	O15254	ACOX3_HUMAN	Peroxisomal acyl-coenzyme A oxidase 3		0.180746	0.850591	0.399577	0.478268
RER1	O15258	O15258	RER1_HUMAN	Protein RER1		0.351246	3.87851	3.56738	0.000332487
SURF4	O15260	O15260	SURF4_HUMAN	Surfeit locus protein 4		-0.0962874	-0.922148	0.44337	0.436753
MAPK13	O15264	O15264	MK13_HUMAN	Mitogen-activated protein kinase 13		1.64527	5.14526	5.47987	4.93827e-06
SPTLC1	O15269	O15269	SPTC1_HUMAN	Serine palmitoyltransferase 1		0.0418374	0.61893	0.268907	0.617163
SPTLC2	O15270	O15270	SPTC2_HUMAN	Serine palmitoyltransferase 2		0.272791	3.32256	2.81012	0.00183534
OGT	O15294	O15294	OGT1_HUMAN	UDP-N-acetylglucosamine--peptide N-acetylglucosaminyltransferase 110 kDa subunit		0.0898953	2.34913	1.65277	0.0308031
PMM2	O15305	O15305	PMM2_HUMAN	Phosphomannomutase 2		0.937261	7.26877	8.98461	0
INPP4B	O15327	O15327	INP4B_HUMAN	Inositol polyphosphate 4-phosphatase type II		-0.104477	-0.593328	0.255497	0.633279
MID1	O15344	O15344	TRI18_HUMAN	E3 ubiquitin-protein ligase Midline-1		0.0208975	0.19213	0.0714446	0.887794
HMGB3	O15347	O15347	HMGB3_HUMAN	High mobility group protein B3		0.848075	4.32846	4.2211	5.40541e-05
PPM1G	O15355	O15355	PPM1G_HUMAN	Protein phosphatase 1G		0.16746	2.11939	1.41624	0.0536623
INPPL1	O15357	O15357	SHIP2_HUMAN	Phosphatidylinositol 3,4,5-trisphosphate 5-phosphatase 2		0.250545	2.79672	2.1554	0.00924809
EIF3D	O15371	O15371	EIF3D_HUMAN	Eukaryotic translation initiation factor 3 subunit D		0.221247	3.21048	2.66519	0.00256518
EIF3H	O15372	O15372	EIF3H_HUMAN	Eukaryotic translation initiation factor 3 subunit H		0.0304492	0.636026	0.277974	0.605831
HDAC3	O15379	O15379	HDAC3_HUMAN	Histone deacetylase 3		0.0508888	0.159275	0.0584857	0.905454
NVL	O15381	O15381	NVL_HUMAN	Nuclear valosin-containing protein-like		0.0491313	0.424329	0.172052	0.740976
BCAT2	O15382	O15382	BCAT2_HUMAN	Branched-chain-amino-acid aminotransferase, mitochondrial		-0.268036	-2.23908	1.53759	0.0403132
IPO8	O15397	O15397	IPO8_HUMAN	Importin-8		0.205651	2.36416	1.66876	0.029622
STX7	O15400	O15400	STX7_HUMAN	Syntaxin-7		0.244834	3.43174	2.95391	0.00127129
TNRC18	O15417	O15417	TNC18_HUMAN	Trinucleotide repeat-containing gene 18 protein		-0.883158	-4.92978	5.14024	4.38116e-06
SLC16A3	O15427	O15427	MOT4_HUMAN	Monocarboxylate transporter 4		0.984504	5.09984	5.40788	4.77327e-06
ABCC4	O15439	O15439	MRP4_HUMAN	ATP-binding cassette sub-family C member 4		-0.132705	-1.53908	0.888657	0.172149
POLR1G	O15446	O15446	RPA34_HUMAN	DNA-directed RNA polymerase I subunit RPA34		-0.0806888	-0.348605	0.137482	0.790651
TLR3	O15455	O15455	TLR3_HUMAN	Toll-like receptor 3		-0.142865	-0.639423	0.279786	0.603517
P4HA2	O15460	O15460	P4HA2_HUMAN	Prolyl 4-hydroxylase subunit alpha-2	ECM-regulators	1.49005	5.2424	5.63445	0
CAPN5	O15484	O15484	CAN5_HUMAN	Calpain-5		-0.898063	-6.18552	7.17228	0
YKT6	O15498	O15498	YKT6_HUMAN	Synaptobrevin homolog YKT6		0.21242	4.38847	4.31067	4.22421e-05
ARPC5	O15511	O15511	ARPC5_HUMAN	Actin-related protein 2/3 complex subunit 5		0.759899	8.22254	10.5854	0
POLR2D	O15514	O15514	RPB4_HUMAN	DNA-directed RNA polymerase II subunit RPB4		-0.282607	-1.20445	0.632073	0.297699
PDPK1	O15530	O15530	PDPK1_HUMAN	3-phosphoinositide-dependent protein kinase 1		0.021542	0.137615	0.0501119	0.919849
TAPBP	O15533	O15533	TPSN_HUMAN	Tapasin		0.866182	5.20121	5.5688	5.06329e-06
DHX15	O43143	O43143	DHX15_HUMAN	ATP-dependent RNA helicase DHX15		0.0106043	0.141996	0.051795	0.917031
RNMT	O43148	O43148	MCES_HUMAN	mRNA cap guanine-N7 methyltransferase		-0.0920701	-0.508348	0.212442	0.686962
ZZEF1	O43149	O43149	ZZEF1_HUMAN	Zinc finger ZZ-type and EF-hand domain-containing protein 1		0.223713	5.12093	5.44128	4.86027e-06
ASAP2	O43150	O43150	ASAP2_HUMAN	Arf-GAP with SH3 domain, ANK repeat and PH domain-containing protein 2		0.477914	2.30516	1.60634	0.0343011
RRP8	O43159	O43159	RRP8_HUMAN	Ribosomal RNA-processing protein 8		0.306923	1.45547	0.82122	0.199158
CYB5B	O43169	O43169	CYB5B_HUMAN	Cytochrome b5 type B		-0.0497456	-0.551809	0.234183	0.660129
PRPF4	O43172	O43172	PRP4_HUMAN	U4/U6 small nuclear ribonucleoprotein Prp4		0.0873971	1.41113	0.786352	0.214039
PHGDH	O43175	O43175	SERA_HUMAN	D-3-phosphoglycerate dehydrogenase		-0.132782	-0.754541	0.343349	0.534702
NDUFS4	O43181	O43181	NDUS4_HUMAN	NADH dehydrogenase [ubiquinone] iron-sulfur protein 4, mitochondrial		0.0493038	0.427118	0.173358	0.73911
ARHGAP6	O43182	O43182	RHG06_HUMAN	Rho GTPase-activating protein 6		-0.82457	-5.25182	5.6495	0
PHF1	O43189	O43189	PHF1_HUMAN	PHD finger protein 1		-0.339604	-1.78364	1.09846	0.108691
SEPTIN4	O43236	O43236	SEPT4_HUMAN	Septin-4		0.599969	3.95144	3.67106	0.000244255
DYNC1LI2	O43237	O43237	DC1L2_HUMAN	Cytoplasmic dynein 1 light intermediate chain 2		0.0526433	0.730638	0.329808	0.54874
PSMD3	O43242	O43242	PSMD3_HUMAN	26S proteasome non-ATPase regulatory subunit 3		0.285632	4.78245	4.91089	7.92079e-06
RBFOX2	O43251	O43251	RFOX2_HUMAN	RNA binding protein fox-1 homolog 2		-0.344035	-3.95838	3.68097	0.000236998
PAPSS1	O43252	O43252	PAPS1_HUMAN	Bifunctional 3'-phosphoadenosine 5'-phosphosulfate synthase 1		0.598464	5.788	6.51716	0
ZW10	O43264	O43264	ZW10_HUMAN	Centromere/kinetochore protein zw10 homolog		0.297207	3.75233	3.39025	0.0004284
EFS	O43281	O43281	EFS_HUMAN	Embryonal Fyn-associated substrate		-0.573203	-3.67096	3.2776	0.000538012
B4GALT5	O43286	O43286	B4GT5_HUMAN	Beta-1,4-galactosyltransferase 5		0.425313	3.08833	2.51047	0.00380135
SART1	O43290	O43290	SNUT1_HUMAN	U4/U6.U5 tri-snRNP-associated protein 1		-0.0328906	-0.46001	0.188942	0.71779
GPAA1	O43292	O43292	GPAA1_HUMAN	Glycosylphosphatidylinositol anchor attachment 1 protein		-0.0432522	-0.579917	0.248554	0.641827
DAPK3	O43293	O43293	DAPK3_HUMAN	Death-associated protein kinase 3		0.441002	2.38245	1.68832	0.0281715
TGFB1I1	O43294	O43294	TGFI1_HUMAN	Transforming growth factor beta-1-induced transcript 1 protein		-0.331973	-1.58295	0.924924	0.158968
AP5Z1	O43299	O43299	AP5Z1_HUMAN	AP-5 complex subunit zeta-1		0.356057	3.38618	2.89361	0.00144703
HSPA12A	O43301	O43301	HS12A_HUMAN	Heat shock 70 kDa protein 12A		-0.975101	-5.24906	5.6451	0
PPIP5K2	O43314	Q6PFW1;O43314	VIP2_HUMAN	Inositol hexakisphosphate and diphosphoinositol-pentakisphosphate kinase 2		0.475809	3.16149	2.60273	0.00305312
MAP3K7	O43318	O43318	M3K7_HUMAN	Mitogen-activated protein kinase kinase kinase 7		0.0602297	0.424388	0.17208	0.741064
EEF1E1	O43324	O43324	MCA3_HUMAN	Eukaryotic translation elongation factor 1 epsilon-1		0.31091	3.50749	3.05517	0.000997821
RASA4	O43374	C9J798;O43374	RASL2_HUMAN	Ras GTPase-activating protein 4		0.0863193	0.574782	0.245911	0.644964
HNRNPR	O43390	O43390	HNRPR_HUMAN	Heterogeneous nuclear ribonucleoprotein R		-0.122286	-1.36962	0.754276	0.229241
PRPF3	O43395	O43395	PRPF3_HUMAN	U4/U6 small nuclear ribonucleoprotein Prp3		0.0714191	1.4005	0.778087	0.217597
TXNL1	O43396	O43396	TXNL1_HUMAN	Thioredoxin-like protein 1		0.217091	3.36321	2.86336	0.0015551
TPD52L2	O43399	O43399	TPD54_HUMAN	Tumor protein D54		-0.0183194	-0.233086	0.0880359	0.863256
EMC8	O43402	O43402	EMC8_HUMAN	ER membrane protein complex subunit 8		0.204211	2.33495	1.63774	0.0318882
ERI3	O43414	O43414	ERI3_HUMAN	ERI1 exoribonuclease 3		0.136357	0.794409	0.366334	0.511061
SYNJ1	O43426	O43426	SYNJ1_HUMAN	Synaptojanin-1		-0.0551218	-0.361499	0.143247	0.782737
FIBP	O43427	O43427	FIBP_HUMAN	Acidic fibroblast growth factor intracellular-binding protein		-0.142481	-2.52662	1.84567	0.0192748
EIF4G3	O43432	O43432	IF4G3_HUMAN	Eukaryotic translation initiation factor 4 gamma 3		0.453293	4.64745	4.70296	1.47465e-05
PPIH	O43447	O43447	PPIH_HUMAN	Peptidyl-prolyl cis-trans isomerase H		0.175557	2.52388	1.84262	0.0194046
HTRA2	O43464	O43464;P83110	HTRA2_HUMAN	Serine protease HTRA2, mitochondrial		-0.241828	-3.18229	2.62919	0.00282684
AKR7A2	O43488	O43488	ARK72_HUMAN	Aflatoxin B1 aldehyde reductase member 2		-0.481314	-5.28744	5.70643	0
EPB41L2	O43491	O43491	E41L2_HUMAN	Band 4.1-like protein 2		-0.248784	-2.76622	2.11948	0.0100468
TGOLN2	O43493	O43493	TGON2_HUMAN	Trans-Golgi network integral membrane protein 2		0.13271	0.732497	0.330855	0.547968
B4GAT1	O43505	O43505	B4GA1_HUMAN	Beta-1,4-glucuronyltransferase 1		-0.777138	-4.93978	5.15588	4.41501e-06
WIPF1	O43516	O43516	WIPF1_HUMAN	WAS/WASL-interacting protein family member 1		1.01773	6.64354	7.93536	0
FOXO3	O43524	O43524	FOXO3_HUMAN	Forkhead box protein O3		0.289322	1.84517	1.15415	0.0959796
SGCE	O43556	O43556	SGCE_HUMAN	Epsilon-sarcoglycan		-0.0136963	-0.0822671	0.0293196	0.953069
RGS14	O43566	O43566	RGS14_HUMAN	Regulator of G-protein signaling 14		0.83717	4.69119	4.7701	1.51515e-05
AKAP10	O43572	O43572	AKA10_HUMAN	A-kinase anchor protein 10, mitochondrial		-0.0402841	-0.546821	0.231658	0.66317
DENR	O43583	O43583	DENR_HUMAN	Density-regulated protein		0.149897	0.966213	0.471148	0.413937
XPOT	O43592	O43592	XPOT_HUMAN	Exportin-T		0.219413	3.85569	3.53513	0.000338558
DNPH1	O43598	O43598	DNPH1_HUMAN	2'-deoxynucleoside 5'-phosphate N-hydrolase 1		-0.00922105	-0.0824253	0.0293778	0.953089
TIMM44	O43615	O43615	TIM44_HUMAN	Mitochondrial import inner membrane translocase subunit TIM44		0.218057	3.11537	2.54442	0.00350297
TRAPPC3	O43617	O43617	TPPC3_HUMAN	Trafficking protein particle complex subunit 3		0.246195	3.34802	2.84343	0.00163848
CHMP2A	O43633	O43633	CHM2A_HUMAN	Charged multivesicular body protein 2a		0.0224464	0.464689	0.191186	0.714877
NCK2	O43639	O43639	NCK2_HUMAN	Cytoplasmic protein NCK2		0.0792126	1.14145	0.587752	0.327106
PLRG1	O43660	O43660	PLRG1_HUMAN	Pleiotropic regulator 1		-0.00673748	-0.130419	0.0473595	0.923758
RGS10	O43665	O43665	RGS10_HUMAN	Regulator of G-protein signaling 10		0.545199	3.44431	2.97063	0.00122275
ZNF207	O43670	O43670	ZN207_HUMAN	BUB3-interacting and GLEBS motif-containing protein ZNF207		-0.16628	-2.38748	1.69371	0.0277879
NDUFB5	O43674	O43674	NDUB5_HUMAN	NADH dehydrogenase [ubiquinone] 1 beta subcomplex subunit 5, mitochondrial		0.0242688	0.205702	0.0768888	0.880899
NDUFB3	O43676	O43676	NDUB3_HUMAN	NADH dehydrogenase [ubiquinone] 1 beta subcomplex subunit 3		0.447635	2.88388	2.25935	0.00719231
NDUFA2	O43678	O43678	NDUA2_HUMAN	NADH dehydrogenase [ubiquinone] 1 alpha subcomplex subunit 2		-0.0246375	-0.199951	0.0745752	0.884057
LDB2	O43679	O43679	LDB2_HUMAN	LIM domain-binding protein 2		-0.278255	-2.64701	1.98136	0.014029
GET3	O43681	O43681	GET3_HUMAN	ATPase GET3		0.153707	2.02859	1.32698	0.0651623
BUB3	O43684	O43684	BUB3_HUMAN	Mitotic checkpoint protein BUB3		0.0115027	0.146882	0.0536782	0.913548
ACTN4	O43707	O43707	ACTN4_HUMAN	Alpha-actinin-4		0.209191	1.32061	0.717108	0.247562
GSTZ1	O43708	O43708	MAAI_HUMAN	Maleylacetoacetate isomerase		-0.112744	-0.969275	0.473102	0.412502
BUD23	O43709	O43709	BUD23_HUMAN	Probable 18S rRNA (guanine-N(7))-methyltransferase		-0.00792556	-0.0457629	0.0160778	0.974194
GATC	O43716	O43716	GATC_HUMAN	Glutamyl-tRNA(Gln) amidotransferase subunit C, mitochondrial		0.0268721	0.283783	0.109251	0.831569
HTATSF1	O43719	O43719	HTSF1_HUMAN	HIV Tat-specific factor 1		0.0879364	1.32595	0.721118	0.245611
PRKAB2	O43741	O43741	AAKB2_HUMAN	5'-AMP-activated protein kinase subunit beta-2		-0.697326	-3.74269	3.37684	0.000440983
AP1G1	O43747	O43747	AP1G1_HUMAN	AP-1 complex subunit gamma-1		0.225533	3.96009	3.68341	0.000234674
STX6	O43752	O43752	STX6_HUMAN	Syntaxin-6		0.504178	2.98164	2.37817	0.00531485
SYNGR1	O43759	O43759	SNG1_HUMAN	Synaptogyrin-1		-0.977642	-6.26009	7.296	0
SYNGR2	O43760	O43760	SNG2_HUMAN	Synaptogyrin-2		0.316568	2.20681	1.50446	0.0435826
SGTA	O43765	O43765	SGTA_HUMAN	Small glutamine-rich tetratricopeptide repeat-containing protein alpha		-0.139305	-1.06696	0.536987	0.36268
ENSA	O43768	O43768;P56211	ENSA_HUMAN	Alpha-endosulfine		-0.098144	-0.893579	0.425691	0.453734
SLC25A20	O43772	O43772	MCAT_HUMAN	Mitochondrial carnitine/acylcarnitine carrier protein		0.15995	1.75531	1.07321	0.114852
NARS1	O43776	O43776	SYNC_HUMAN	Asparagine--tRNA ligase, cytoplasmic		0.225538	2.36407	1.66867	0.0296173
MYO1B	O43795	O43795	MYO1B_HUMAN	Unconventional myosin-Ib		0.3624	3.03414	2.44293	0.00454297
NUDT21	O43809	O43809	CPSF5_HUMAN	Cleavage and polyadenylation specificity factor subunit 5		-0.0060917	-0.0805515	0.0286889	0.954023
LANCL1	O43813	O43813	LANC1_HUMAN	Glutathione S-transferase LANCL1		-0.200919	-2.21088	1.50862	0.0431971
STRN	O43815	O43815	STRN_HUMAN	Striatin		0.254177	4.53185	4.52675	3.16901e-05
RRP9	O43818	O43818	U3IP2_HUMAN	U3 small nucleolar RNA-interacting protein 2		-0.260824	-2.33279	1.63545	0.032049
SCO2	O43819	O43819	SCO2_HUMAN	Protein SCO2 homolog, mitochondrial		0.850557	3.87667	3.56478	0.000331646
CFAP410	O43822	O43822	CF410_HUMAN	Cilia- and flagella-associated protein 410		-0.308011	-2.32582	1.62809	0.0325577
AKAP8	O43823	O43823	AKAP8_HUMAN	A-kinase anchor protein 8		-0.33309	-2.52088	1.83929	0.0195486
IDH3B	O43837	O43837	IDH3B_HUMAN	Isocitrate dehydrogenase [NAD] subunit beta, mitochondrial		0.0571843	0.744056	0.337387	0.541522
NRDC	O43847	O43847	NRDC_HUMAN	Nardilysin		0.797953	6.31168	7.38174	0
CALU	O43852	O43852	CALU_HUMAN	Calumenin		0.623063	4.80605	4.94746	4.0201e-06
AHCYL1	O43865	O43865	SAHH2_HUMAN	S-adenosylhomocysteine hydrolase-like protein 1		-0.00809212	-0.105937	0.0381055	0.939192
CD5L	O43866	O43866	CD5L_HUMAN	CD5 antigen-like		0.185304	0.993237	0.48849	0.400113
KIF1C	O43896	O43896	KIF1C_HUMAN	Kinesin-like protein KIF1C		0.361919	1.53399	0.884495	0.173762
ORC5	O43913	O43913	ORC5_HUMAN	Origin recognition complex subunit 5		-0.348466	-2.26136	1.56062	0.038206
TYROBP	O43914	O43914	TYOBP_HUMAN	TYRO protein tyrosine kinase-binding protein		1.08183	6.20987	7.21265	0
NDUFS5	O43920	O43920	NDUS5_HUMAN	NADH dehydrogenase [ubiquinone] iron-sulfur protein 5		-0.0436491	-0.597834	0.257842	0.630436
PDE6D	O43924	O43924	PDE6D_HUMAN	Retinal rod rhodopsin-sensitive cGMP 3',5'-cyclic phosphodiesterase subunit delta		-0.363754	-5.71681	6.40077	0
RAD21	O60216	O60216	RAD21_HUMAN	Double-strand-break repair protein rad21 homolog		-0.379823	-6.05811	6.96142	0
TIMM8A	O60220	O60220	TIM8A_HUMAN	Mitochondrial import inner membrane translocase subunit Tim8 A		-0.155296	-1.52495	0.87711	0.176792
KALRN	O60229	O60229	KALRN_HUMAN	Kalirin		-0.841521	-3.61036	3.19451	0.000704816
DHX16	O60231	O60231	DHX16_HUMAN	Pre-mRNA-splicing factor ATP-dependent RNA helicase DHX16		0.01261	0.174606	0.064494	0.897
ZNRD2	O60232	O60232	ZNRD2_HUMAN	Protein ZNRD2		0.550573	2.86044	2.2312	0.00766983
GMFG	O60234	O60234	GMFG_HUMAN	Glia maturation factor gamma		1.22281	9.27405	12.3283	0
PPP1R12B	O60237	O60237	MYPT2_HUMAN	Protein phosphatase 1 regulatory subunit 12B		-0.486512	-2.37001	1.67501	0.0291212
HS6ST1	O60243	O60243	H6ST1_HUMAN	Heparan-sulfate 6-O-sulfotransferase 1		-0.401336	-2.18264	1.47985	0.0462341
MED14	O60244	O60244	MED14_HUMAN	Mediator of RNA polymerase II transcription subunit 14		0.166907	1.15787	0.599181	0.31962
PRPSAP2	O60256	O60256	KPRB_HUMAN	Phosphoribosyl pyrophosphate synthase-associated protein 2		-0.107301	-1.73263	1.05317	0.120105
GNG7	O60262	O60262	GBG7_HUMAN	Guanine nucleotide-binding protein G(I)/G(S)/G(O) subunit gamma-7		-0.940413	-5.81092	6.5547	0
SMARCA5	O60264	O60264;P28370	SMCA5_HUMAN	SWI/SNF-related matrix-associated actin-dependent regulator of chromatin subfamily A member 5		-0.0426678	-0.649812	0.285353	0.597765
SPAG9	O60271	O60271	JIP4_HUMAN	C-Jun-amino-terminal kinase-interacting protein 4		-0.0841505	-1.82375	1.13464	0.100238
ZNF292	O60281	O60281	ZN292_HUMAN	Zinc finger protein 292		-0.136796	-0.553306	0.234942	0.659196
URB1	O60287	O60287	NPA1P_HUMAN	Nucleolar pre-ribosomal-associated protein 1		0.0669564	0.306214	0.118879	0.816698
AQR	O60306	O60306	AQR_HUMAN	RNA helicase aquarius		-0.0328266	-0.49322	0.205011	0.695475
OPA1	O60313	O60313	OPA1_HUMAN	Dynamin-like 120 kDa protein, mitochondrial		-0.105034	-1.99326	1.29291	0.0702651
ZEB2	O60315	O60315	ZEB2_HUMAN	Zinc finger E-box-binding homeobox 2		-0.19675	-1.81661	1.12817	0.101709
MCM3AP	O60318	O60318	GANP_HUMAN	Germinal-center associated nuclear protein		-0.130174	-0.872742	0.41296	0.465475
PIP5K1C	O60331	O60331	PI51C_HUMAN	Phosphatidylinositol 4-phosphate 5-kinase type-1 gamma		-0.46497	-4.44862	4.40097	4.01003e-05
KIF1B	O60333	O60333	KIF1B_HUMAN	Kinesin-like protein KIF1B		1.01586	3.8065	3.46594	0.000387654
KDM1A	O60341	O60341	KDM1A_HUMAN	Lysine-specific histone demethylase 1A		-0.405147	-3.47243	3.00815	0.00112997
TBC1D4	O60343	O60343	TBCD4_HUMAN	TBC1 domain family member 4		0.0514378	0.42539	0.172549	0.740473
PPL	O60437	O60437	PEPL_HUMAN	Periplakin		0.0381747	0.220528	0.0828966	0.871599
GSDME	O60443	O60443	GSDME_HUMAN	Gasdermin-E		-0.358784	-3.00618	2.40836	0.00493851
LY75	O60449	O60449	LY75_HUMAN	Lymphocyte antigen 75		0.658964	3.59726	3.17665	0.000740991
NRP2	O60462	O60462	NRP2_HUMAN	Neuropilin-2		0.654274	3.22168	2.67955	0.00244902
MAN1A2	O60476	O60476	MA1A2_HUMAN	Mannosyl-oligosaccharide 1,2-alpha-mannosidase IB		0.358202	2.0963	1.39331	0.0564292
PLXNC1	O60486	O60486	PLXC1_HUMAN	Plexin-C1	ECM-affiliated	0.379887	2.58929	1.91582	0.0163812
ACSL4	O60488	O60488	ACSL4_HUMAN	Long-chain-fatty-acid--CoA ligase 4		0.395672	3.0326	2.44102	0.00455458
SNX3	O60493	O60493	SNX3_HUMAN	Sorting nexin-3		0.163459	2.29498	1.59567	0.0352513
DOK2	O60496	O60496	DOK2_HUMAN	Docking protein 2		1.43261	6.74495	8.10514	0
OGA	O60502	O60502	OGA_HUMAN	Protein O-GlcNAcase		0.0762932	0.958466	0.46622	0.417944
SORBS3	O60504	O60504	VINEX_HUMAN	Vinexin		-0.619601	-5.10388	5.41428	4.79616e-06
SYNCRIP	O60506	O60506	HNRPQ_HUMAN	Heterogeneous nuclear ribonucleoprotein Q		0.405316	4.16682	3.98251	0.000110868
CDC40	O60508	O60508	PRP17_HUMAN	Pre-mRNA-processing factor 17		0.116445	1.65087	0.982257	0.140638
RANBP6	O60518	O60518	RNBP6_HUMAN	Ran-binding protein 6		0.271979	1.28882	0.693409	0.260358
NEMF	O60524	O60524	NEMF_HUMAN	Ribosome quality control complex subunit NEMF		0.147697	2.20793	1.50561	0.0435117
GMDS	O60547	O60547	GMDS_HUMAN	GDP-mannose 4,6 dehydratase		0.598491	4.01731	3.76548	0.000199317
NMT2	O60551	O60551	NMT2_HUMAN	Glycylpeptide N-tetradecanoyltransferase 2		-0.473615	-3.65625	3.25736	0.000578397
PLOD3	O60568	O60568	PLOD3_HUMAN	Multifunctional procollagen lysine hydroxylase and glycosyltransferase LH3	ECM-regulators	0.714971	5.75039	6.45563	0
EIF4E2	O60573	O60573	IF4E2_HUMAN	Eukaryotic translation initiation factor 4E type 2		0.144299	0.84832	0.398214	0.479252
TLR2	O60603	O60603	TLR2_HUMAN	Toll-like receptor 2		1.33454	5.68025	6.34112	0
DIAPH1	O60610	O60610	DIAP1_HUMAN	Protein diaphanous homolog 1		0.606853	6.96658	8.47685	0
SELENOF	O60613	O60613	SEP15_HUMAN	Selenoprotein F		0.199826	0.874567	0.414069	0.464645
EXOC3	O60645	O60645	EXOC3_HUMAN	Exocyst complex component 3		0.0442281	1.16446	0.60379	0.316669
PDE8A	O60658	O60658	PDE8A_HUMAN	High affinity cAMP-specific and IBMX-insensitive 3',5'-cyclic phosphodiesterase 8A		-0.243968	-1.90936	1.21348	0.084252
PLIN3	O60664	O60664	PLIN3_HUMAN	Perilipin-3		0.174221	1.75208	1.07035	0.115599
PRMT3	O60678	O60678	ANM3_HUMAN	Protein arginine N-methyltransferase 3		0.375824	1.21822	0.641928	0.291908
KPNA6	O60684	O60684	IMA7_HUMAN	Importin subunit alpha-7		0.156668	1.89455	1.19969	0.0867313
SRPX2	O60687	O60687	SRPX2_HUMAN	Sushi repeat-containing protein SRPX2	ECM-glycoproteins	0.650086	2.51923	1.83746	0.0196286
UGDH	O60701	O60701	UGDH_HUMAN	UDP-glucose 6-dehydrogenase		0.0772791	0.769001	0.351627	0.526695
ABCC9	O60706	O60706	ABCC9_HUMAN	ATP-binding cassette sub-family C member 9		-0.537581	-4.3852	4.30579	4.22078e-05
LPXN	O60711	O60711	LPXN_HUMAN	Leupaxin		0.885736	2.7291	2.07608	0.0111184
CTNND1	O60716	O60716	CTND1_HUMAN	Catenin delta-1		0.191898	2.26007	1.55929	0.0383171
ICMT	O60725	O60725	ICMT_HUMAN	Protein-S-isoprenylcysteine O-methyltransferase		0.203216	2.12111	1.41795	0.0535273
SNX2	O60749	Q13596;O60749	SNX2_HUMAN	Sorting nexin-2		0.153004	1.97716	1.2775	0.0727706
DPM1	O60762	O60762	DPM1_HUMAN	Dolichol-phosphate mannosyltransferase subunit 1		0.143653	1.89089	1.19629	0.0874567
USO1	O60763	O60763	USO1_HUMAN	General vesicular transport factor p115		0.561461	5.31755	5.75464	0
TOM1	O60784	O60784	TOM1_HUMAN	Target of Myb1 membrane trafficking protein		0.188044	2.13491	1.43175	0.0517289
H2BC10;H2BC12;H2BC14;H2BC15;H2BC18;H2BC5;H2BC9	O60814;P58876;P62807;Q5QNW6;Q93079;Q99877;Q99879	Q99879;P57053;Q5QNW6;Q16778;O60814;P62807;P23527;P06899;Q99880;Q99877;P33778;Q93079;Q8N257;Q96A08;P58876	H2B1C_HUMAN;H2B1D_HUMAN;H2B1H_HUMAN;H2B1K_HUMAN;H2B1M_HUMAN;H2B1N_HUMAN;H2B2F_HUMAN	Histone H2B type 1-K		-0.390017	-4.25015	4.10501	6.9697e-05
PFKFB2	O60825	O60825	F262_HUMAN	6-phosphofructo-2-kinase/fructose-2,6-bisphosphatase 2		0.507266	3.10754	2.53457	0.00359418
CCDC22	O60826	O60826	CCD22_HUMAN	Coiled-coil domain-containing protein 22		0.0239973	0.545899	0.231192	0.66344
PRAF2	O60831	O60831	PRAF2_HUMAN	PRA1 family protein 2		-0.0285981	-0.293711	0.113494	0.825556
DKC1	O60832	O60832	DKC1_HUMAN	H/ACA ribonucleoprotein complex subunit DKC1		0.240005	2.87997	2.25464	0.00725771
EIF5B	O60841	O60841	IF2P_HUMAN	Eukaryotic translation initiation factor 5B		0.408858	5.00773	5.26254	4.57666e-06
EDF1	O60869	O60869	EDF1_HUMAN	Endothelial differentiation-related factor 1		0.0682108	0.405557	0.163321	0.753118
DIAPH2	O60879	O60879	DIAP2_HUMAN	Protein diaphanous homolog 2		-0.0658574	-0.514858	0.215662	0.682551
DNAJA2	O60884	O60884	DNJA2_HUMAN	DnaJ homolog subfamily A member 2		0.00260781	0.037239	0.0130392	0.978921
BRD4	O60885	Q15059;O60885	BRD4_HUMAN	Bromodomain-containing protein 4		-0.177664	-2.49383	1.80938	0.0210025
CUTA	O60888	O60888	CUTA_HUMAN	Protein CutA		-0.0545624	-0.410313	0.165523	0.749611
PFDN1	O60925	O60925	PFD1_HUMAN	Prefoldin subunit 1		-0.0410666	-0.742724	0.336633	0.542205
NBN	O60934	O60934	NBN_HUMAN	Nibrin		0.224851	3.42678	2.94733	0.001301
NOL3	O60936	O60936	NOL3_HUMAN	Nucleolar protein 3		-0.981086	-5.58639	6.18842	0
DTNB	O60941	O60941	DTNB_HUMAN	Dystrobrevin beta		-0.881123	-2.84608	2.21404	0.00799672
ABCB7	O75027	O75027	ABCB7_HUMAN	Iron-sulfur clusters transporter ABCB7, mitochondrial		0.128122	0.855151	0.40232	0.476152
SRGAP2	O75044	O75044;Q7Z6B7	SRGP2_HUMAN	SLIT-ROBO Rho GTPase-activating protein 2		0.715249	3.11586	2.54504	0.00349909
DENND4B	O75064	O75064	DEN4B_HUMAN	DENN domain-containing protein 4B		0.485112	2.78618	2.14295	0.00950759
WDR1	O75083	O75083	WDR1_HUMAN	WD repeat-containing protein 1		0.275938	2.3033	1.60439	0.0344593
FZD7	O75084	O75084	FZD7_HUMAN	Frizzled-7		-0.467428	-2.38291	1.68882	0.0281453
SLIT3	O75094	O75094	SLIT3_HUMAN	Slit homolog 3 protein	ECM-glycoproteins	0.0985404	0.523652	0.220032	0.677559
ATP9A	O75110	O75110	ATP9A_HUMAN	Probable phospholipid-transporting ATPase IIA		0.364585	1.76616	1.08286	0.112319
LDB3	O75112	O75112	LDB3_HUMAN	LIM domain-binding protein 3		-0.508013	-1.38975	0.769768	0.22163
ROCK2	O75116	O75116	ROCK2_HUMAN	Rho-associated protein kinase 2		-0.103877	-1.42801	0.799555	0.208076
CLASP2	O75122	O75122	CLAP2_HUMAN	CLIP-associating protein 2		-0.216267	-3.14504	2.58187	0.00320333
CPNE3	O75131	O75131	CPNE3_HUMAN	Copine-3		-0.211511	-2.88347	2.25885	0.00719799
HIP1R	O75146	O75146	HIP1R_HUMAN	Huntingtin-interacting protein 1-related protein		0.550274	3.36816	2.86986	0.0015202
OBSL1	O75147	O75147	OBSL1_HUMAN	Obscurin-like protein 1		-0.549023	-4.98958	5.23401	4.53001e-06
RNF40	O75150	O75150	BRE1B_HUMAN	E3 ubiquitin-protein ligase BRE1B		-0.0882564	-1.56138	0.907019	0.165635
PHF2	O75151	O75151	PHF2_HUMAN	Lysine-specific demethylase PHF2		-0.631809	-5.67586	6.33397	0
ZC3H11A	O75152	O75152	ZC11A_HUMAN	Zinc finger CCCH domain-containing protein 11A		0.0529717	0.686659	0.305365	0.574569
CLUH	O75153	O75153	CLU_HUMAN	Clustered mitochondria protein homolog		0.177384	1.04552	0.522701	0.373478
CAND2	O75155	O75155	CAND2_HUMAN	Cullin-associated NEDD8-dissociated protein 2		-0.398305	-3.16848	2.6116	0.00298131
DNAJC13	O75165	O75165	DJC13_HUMAN	DnaJ homolog subfamily C member 13		0.173902	3.6042	3.18612	0.000718644
PHACTR2	O75167	O75167	PHAR2_HUMAN	Phosphatase and actin regulator 2		0.388375	2.67192	2.00991	0.0131083
PPP6R2	O75170	O75170	PP6R2_HUMAN	Serine/threonine-protein phosphatase 6 regulatory subunit 2		0.0877802	0.888696	0.422695	0.456391
ADAMTS4	O75173	O75173	ATS4_HUMAN	A disintegrin and metalloproteinase with thrombospondin motifs 4	ECM-regulators	1.11646	3.03635	2.44567	0.00452757
CNOT3	O75175	O75175	CNOT3_HUMAN	CCR4-NOT transcription complex subunit 3		0.0493341	0.472362	0.194879	0.709934
ANKRD17	O75179	O75179	ANR17_HUMAN	Ankyrin repeat domain-containing protein 17		0.355524	2.64295	1.97673	0.014153
SIN3B	O75182	O75182	SIN3B_HUMAN	Paired amphipathic helix protein Sin3b		-0.191892	-1.45782	0.823084	0.198471
DNAJB6	O75190	O75190	DNJB6_HUMAN	DnaJ homolog subfamily B member 6		-0.145479	-0.979124	0.479405	0.40765
XYLB	O75191	O75191	XYLB_HUMAN	Xylulose kinase		0.0631301	0.499739	0.208204	0.692204
COQ9	O75208	O75208	COQ9_HUMAN	Ubiquinone biosynthesis protein COQ9, mitochondrial		-0.31496	-1.12643	0.577373	0.333705
GGCT	O75223	O75223	GGCT_HUMAN	Gamma-glutamylcyclotransferase		0.69332	3.01927	2.42452	0.00473269
NDUFS7	O75251	O75251	NDUS7_HUMAN	NADH dehydrogenase [ubiquinone] iron-sulfur protein 7, mitochondrial		0.0858175	1.15554	0.597555	0.320679
NDUFS2	O75306	O75306	NDUS2_HUMAN	NADH dehydrogenase [ubiquinone] iron-sulfur protein 2, mitochondrial		0.0117877	0.20594	0.0769846	0.880848
ZPR1	O75312	O75312	ZPR1_HUMAN	Zinc finger protein ZPR1		0.216917	2.43469	1.74468	0.0245423
USP12	O75317	O75317;P62068	UBP12_HUMAN	Ubiquitin carboxyl-terminal hydrolase 12		-0.109527	-0.668276	0.295327	0.585716
NIPSNAP2	O75323	O75323	NIPS2_HUMAN	Protein NipSnap homolog 2		-0.428334	-5.37587	5.84824	0
CILP	O75339	O75339	CILP1_HUMAN	Cartilage intermediate layer protein 1	ECM-glycoproteins	0.776069	2.4839	1.79845	0.0216555
PDCD6	O75340	O75340	PDCD6_HUMAN	Programmed cell death protein 6		-0.200363	-2.56082	1.88382	0.0175827
ALOX12B	O75342	O75342	LX12B_HUMAN	Arachidonate 12-lipoxygenase, 12R-type		0.135095	0.32351	0.126405	0.806741
TBCA	O75347	O75347	TBCA_HUMAN	Tubulin-specific chaperone A		0.0727321	0.771361	0.352985	0.525327
ATP6V1G1	O75348	O75348	VATG1_HUMAN	V-type proton ATPase subunit G 1		0.788185	8.07311	10.3354	0
VPS4B	O75351	O75351	VPS4B_HUMAN	Vacuolar protein sorting-associated protein 4B		0.324827	4.75818	4.87334	7.82779e-06
MPDU1	O75352	O75352	MPU1_HUMAN	Mannose-P-dolichol utilization defect 1 protein		0.720361	6.01522	6.89061	0
MACROH2A1	O75367	O75367	H2AY_HUMAN	Core histone macro-H2A.1		-0.350928	-3.47611	3.01308	0.00111733
SH3BGRL	O75368	O75368	SH3L1_HUMAN	Adapter SH3BGRL		-0.169868	-1.43932	0.808452	0.204162
FLNB	O75369	O75369	FLNB_HUMAN	Filamin-B		0.133055	1.10894	0.565376	0.342134
NCOR1	O75376	O75376;Q9Y618	NCOR1_HUMAN	Nuclear receptor corepressor 1		-0.16622	-3.16761	2.6105	0.00299113
NDUFS6	O75380	O75380	NDUS6_HUMAN	NADH dehydrogenase [ubiquinone] iron-sulfur protein 6, mitochondrial		0.550147	2.87456	2.24814	0.0073777
PEX14	O75381	O75381	PEX14_HUMAN	Peroxisomal membrane protein PEX14		0.614999	2.42727	1.73662	0.0250489
TRIM3	O75382	O75382	TRIM3_HUMAN	Tripartite motif-containing protein 3		-0.0191868	-0.168653	0.0621531	0.899479
TULP3	O75386	O75386	TULP3_HUMAN	Tubby-related protein 3		-0.754852	-5.97245	6.8201	0
CS	O75390	O75390	CISY_HUMAN	Citrate synthase, mitochondrial		0.192313	2.21853	1.51646	0.04244
SPAG7	O75391	O75391	SPAG7_HUMAN	Sperm-associated antigen 7		0.00728277	0.0508478	0.0179	0.971033
SEC22B	O75396	O75396	SC22B_HUMAN	Vesicle-trafficking protein SEC22b		0.326151	3.67634	3.285	0.000530516
PRPF40A	O75400	O75400	PR40A_HUMAN	Pre-mRNA-processing factor 40 homolog A		0.0284777	0.36709	0.145762	0.779532
TACC1	O75410	O75410;O95359	TACC1_HUMAN	Transforming acidic coiled-coil-containing protein 1		-0.352199	-4.41387	4.34874	4.26579e-05
LRCH4	O75427	O75427	LRCH4_HUMAN	Leucine-rich repeat and calponin homology domain-containing protein 4		0.375871	5.64747	6.28771	0
MTX2	O75431	O75431	MTX2_HUMAN	Metaxin-2		0.100958	1.37745	0.760286	0.226222
VPS26A	O75436	O75436	VP26A_HUMAN	Vacuolar protein sorting-associated protein 26A		0.0630306	1.02311	0.507935	0.385184
NDUFB1	O75438	O75438	NDUB1_HUMAN	NADH dehydrogenase [ubiquinone] 1 beta subcomplex subunit 1		0.0462021	0.269988	0.103403	0.840104
PMPCB	O75439	O75439	MPPB_HUMAN	Mitochondrial-processing peptidase subunit beta		0.095289	1.27604	0.683969	0.265847
MED24	O75448	O75448	MED24_HUMAN	Mediator of RNA polymerase II transcription subunit 24		0.139517	1.07443	0.541995	0.3594
PSIP1	O75475	O75475	PSIP1_HUMAN	PC4 and SFRS1-interacting protein		-0.625613	-6.08751	7.01001	0
ERLIN1	O75477	O75477	ERLN1_HUMAN	Erlin-1		-0.621885	-6.76829	8.14424	0
GPC4	O75487	O75487	GPC4_HUMAN	Glypican-4	ECM-affiliated	0.050687	0.228616	0.0862012	0.866095
NDUFS3	O75489	O75489	NDUS3_HUMAN	NADH dehydrogenase [ubiquinone] iron-sulfur protein 3, mitochondrial		0.053444	0.74964	0.340558	0.537949
SRSF10	O75494	O75494	SRS10_HUMAN	Serine/arginine-rich splicing factor 10		-0.0417838	-0.581193	0.249212	0.641212
CLN5	O75503	O75503	CLN5_HUMAN	Ceroid-lipofuscinosis neuronal protein 5		0.582296	3.63772	3.23194	0.000625287
HSBP1	O75506	O75506	HSBP1_HUMAN	Heat shock factor-binding protein 1		-0.259701	-1.77517	1.09089	0.110436
ECI2	O75521	O75521	ECI2_HUMAN	Enoyl-CoA delta isomerase 2		-0.341237	-2.84467	2.21234	0.00803441
KHDRBS3	O75525	O75525	KHDR3_HUMAN	KH domain-containing, RNA-binding, signal transduction-associated protein 3		-0.0899563	-0.64016	0.28018	0.603248
EED	O75530	O75530	EED_HUMAN	Polycomb protein EED		0.244201	1.16237	0.602325	0.317442
BANF1	O75531	O75531	BAF_HUMAN	Barrier-to-autointegration factor		-0.709955	-7.06111	8.63561	0
SF3B1	O75533	O75533	SF3B1_HUMAN	Splicing factor 3B subunit 1		0.0812196	1.38905	0.769226	0.221891
CSDE1	O75534	O75534	CSDE1_HUMAN	Cold shock domain-containing protein E1		0.326097	4.45736	4.41414	3.69128e-05
STX11	O75558	O75558	STX11_HUMAN	Syntaxin-11		1.0618	4.92218	5.12834	4.3573e-06
SKAP2	O75563	O75563	SKAP2_HUMAN	Src kinase-associated phosphoprotein 2		1.2128	5.08091	5.37795	4.72255e-06
PRKRA	O75569	O75569	PRKRA_HUMAN	Interferon-inducible double-stranded RNA-dependent protein kinase activator A		0.189362	2.48408	1.79864	0.0216561
LRP6	O75581	O75581	LRP6_HUMAN	Low-density lipoprotein receptor-related protein 6		-0.481721	-2.65325	1.9885	0.0137582
RPS6KA5	O75582	O75582	KS6A5_HUMAN	Ribosomal protein S6 kinase alpha-5		-0.557831	-3.55086	3.11365	0.000871965
MED6	O75586	O75586	MED6_HUMAN	Mediator of RNA polymerase II transcription subunit 6		-0.0760035	-0.793466	0.365784	0.511706
MYCBP2	O75592	O75592	MYCB2_HUMAN	E3 ubiquitin-protein ligase MYCBP2		0.0799861	0.738474	0.334227	0.544491
LYPLA1	O75608	O75608	LYPA1_HUMAN	Acyl-protein thioesterase 1		0.742158	7.80163	9.88016	0
REM1	O75628	O75628	REM1_HUMAN	GTP-binding protein REM 1		-0.685176	-3.50597	3.05311	0.00100054
SERPINB7	O75635	O75635	SPB7_HUMAN	Serpin B7	ECM-regulators	-0.00939448	-0.0310509	0.010846	0.982259
FCN3	O75636	O75636	FCN3_HUMAN	Ficolin-3	ECM-affiliated	0.261412	1.79461	1.10831	0.10627
SNRNP200	O75643	O75643	U520_HUMAN	U5 small nuclear ribonucleoprotein 200 kDa helicase		-0.0464008	-0.77798	0.356801	0.521225
TIPRL	O75663	O75663	TIPRL_HUMAN	TIP41-like protein		-0.0849812	-1.27975	0.686706	0.264292
RPS6KA4	O75676	O75676	KS6A4_HUMAN	Ribosomal protein S6 kinase alpha-4		0.00448038	0.0573673	0.0202469	0.967534
SURF6	O75683	O75683	SURF6_HUMAN	Surfeit locus protein 6		0.38414	1.35318	0.741721	0.235176
PPM1B	O75688	O75688	PPM1B_HUMAN	Protein phosphatase 1B		-0.0310158	-0.254815	0.0970364	0.849566
ADAP1	O75689	O75689	ADAP1_HUMAN	Arf-GAP with dual PH domain-containing protein 1		0.400386	1.42368	0.796159	0.209477
UTP20	O75691	O75691	UTP20_HUMAN	Small subunit processome component 20 homolog		0.0596885	0.54972	0.233125	0.661488
NUP155	O75694	O75694	NU155_HUMAN	Nuclear pore complex protein Nup155		-0.148298	-2.6989	2.04102	0.0120839
RP2	O75695	O75695	XRP2_HUMAN	Protein XRP2		0.138026	1.78548	1.10011	0.108304
WDHD1	O75717	O75717	WDHD1_HUMAN	WD repeat and HMG-box DNA-binding protein 1		-0.814175	-2.99627	2.39615	0.0050879
CRTAP	O75718	O75718	CRTAP_HUMAN	Cartilage-associated protein		0.899379	4.672	4.74061	1.49254e-05
SLC25A12	O75746	O75746	S2512_HUMAN	Electrogenic aspartate/glutamate antiporter SLC25A12, mitochondrial		-0.243723	-2.97091	2.36502	0.00548512
SLC22A3	O75751	O75751	S22A3_HUMAN	Solute carrier family 22 member 3		-1.32228	-4.69215	4.77157	1.13744e-05
PALM	O75781	O75781	PALM_HUMAN	Paralemmin-1		-1.03609	-6.5044	7.70283	0
ATP6AP2	O75787	O75787	RENR_HUMAN	Renin receptor		0.161189	0.993414	0.488605	0.400072
GRAP2	O75791	O75791	GRAP2_HUMAN	GRB2-related adapter protein 2		0.926155	4.31971	4.20809	5.35433e-05
RNASEH2A	O75792	O75792	RNH2A_HUMAN	Ribonuclease H2 subunit A		0.0792834	0.523297	0.219855	0.677491
POP7	O75817	O75817	POP7_HUMAN	Ribonuclease P protein subunit p20		-0.0886486	-0.43191	0.175608	0.735933
EIF3G	O75821	O75821	EIF3G_HUMAN	Eukaryotic translation initiation factor 3 subunit G		0.148034	1.91563	1.21935	0.0832489
EIF3J	O75822	O75822	EIF3J_HUMAN	Eukaryotic translation initiation factor 3 subunit J		0.316353	3.15039	2.58865	0.00315146
CBR3	O75828	O75828	CBR3_HUMAN	Carbonyl reductase [NADPH] 3		-0.521005	-4.76558	4.88478	7.83546e-06
PSMD10	O75832	O75832	PSD10_HUMAN	26S proteasome non-ATPase regulatory subunit 10		-0.161772	-2.42876	1.73824	0.0249539
AP1G2	O75843	O75843	AP1G2_HUMAN	AP-1 complex subunit gamma-like 2		0.866713	4.36281	4.27231	4.51977e-05
ZMPSTE24	O75844	O75844	FACE1_HUMAN	CAAX prenyl protease 1 homolog		0.27614	2.79693	2.15565	0.00924377
IDH1	O75874	O75874	IDHC_HUMAN	Isocitrate dehydrogenase [NADP] cytoplasmic		-0.386995	-3.19189	2.64143	0.00275106
GATB	O75879	O75879	GATB_HUMAN	Glutamyl-tRNA(Gln) amidotransferase subunit B, mitochondrial		0.337775	1.83624	1.146	0.0977693
SCO1	O75880	O75880	SCO1_HUMAN	Protein SCO1 homolog, mitochondrial		0.0216229	0.114197	0.0412086	0.934172
CYP7B1	O75881	O75881	CP7B1_HUMAN	Cytochrome P450 7B1		0.266676	2.11822	1.41507	0.0537877
ATRN	O75882	O75882	ATRN_HUMAN	Attractin		-0.261402	-1.78343	1.09828	0.108682
RBBP9	O75884	O75884	RBBP9_HUMAN	Serine hydrolase RBBP9		0.0492706	0.594159	0.255929	0.633071
STAM2	O75886	O75886	STAM2_HUMAN	Signal transducing adapter molecule 2		-0.154546	-1.86551	1.17282	0.0919624
TNFSF13	O75888	O75888	TNF13_HUMAN	Tumor necrosis factor ligand superfamily member 13	Secreted-factors	-1.07177	-3.37013	2.87246	0.0015159
ALDH1L1	O75891	O75891	AL1L1_HUMAN	Cytosolic 10-formyltetrahydrofolate dehydrogenase		-0.943109	-3.49952	3.04446	0.00102547
MMP23B	O75900	O75900	MMP23_HUMAN	Matrix metalloproteinase-23	ECM-regulators	-0.633584	-1.68896	1.01504	0.130482
CCNK	O75909	O75909	CCNK_HUMAN	Cyclin-K		0.152733	1.18462	0.617984	0.307305
ARL6IP5	O75915	O75915	PRAF3_HUMAN	PRA1 family protein 3		-0.32872	-2.90222	2.28145	0.00680471
DYSF	O75923	O75923	DYSF_HUMAN	Dysferlin		0.0173129	0.106541	0.0383319	0.938801
PIAS2	O75928	Q9Y6X2;O75928	PIAS2_HUMAN	E3 SUMO-protein ligase PIAS2		-0.20335	-1.58312	0.925068	0.15896
BCAS2	O75934	O75934	SPF27_HUMAN	Pre-mRNA-splicing factor SPF27		-0.115198	-2.11513	1.412	0.054066
DCTN3	O75935	O75935	DCTN3_HUMAN	Dynactin subunit 3		0.0589192	1.18803	0.620394	0.305615
DNAJC8	O75937	O75937	DNJC8_HUMAN	DnaJ homolog subfamily C member 8		-0.118798	-1.35595	0.74383	0.234286
SMNDC1	O75940	O75940	SPF30_HUMAN	Survival of motor neuron-related-splicing factor 30		-0.252711	-1.64148	0.97424	0.142745
ATP5PD	O75947	O75947	ATP5H_HUMAN	ATP synthase subunit d, mitochondrial		-0.0913073	-0.976057	0.477439	0.409255
TSPAN9	O75954	O75954	TSN9_HUMAN	Tetraspanin-9		-0.782306	-4.96503	5.19546	4.47427e-06
FLOT1	O75955	O75955	FLOT1_HUMAN	Flotillin-1		0.175777	2.07472	1.37202	0.0590519
TRIO	O75962	O75962	TRIO_HUMAN	Triple functional domain protein		0.0420997	0.432715	0.175987	0.735503
ATP5MG	O75964	O75964	ATP5L_HUMAN	ATP synthase subunit g, mitochondrial		-0.0843114	-1.07047	0.539338	0.361316
MPDZ	O75970	O75970	MPDZ_HUMAN	Multiple PDZ domain protein		-0.470918	-1.88661	1.19232	0.0881899
CPD	O75976	O75976	CBPD_HUMAN	Carboxypeptidase D		0.348384	1.09065	0.552938	0.350997
SASH3	O75995	O75995	SASH3_HUMAN	SAM and SH3 domain-containing protein 3		1.1603	5.91183	6.72033	0
GLRX3	O76003	O76003	GLRX3_HUMAN	Glutaredoxin-3		0.660125	7.97016	10.1629	0
RSL1D1	O76021	O76021	RL1D1_HUMAN	Ribosomal L1 domain-containing protein 1		0.220562	2.122	1.41884	0.0534491
WFS1	O76024	O76024	WFS1_HUMAN	Wolframin		-1.34805	-8.69873	11.3789	0
ANXA9	O76027	O76027	ANXA9_HUMAN	Annexin A9	ECM-affiliated	-0.67096	-2.14766	1.44453	0.0502079
CLPX	O76031	O76031	CLPX_HUMAN	ATP-dependent Clp protease ATP-binding subunit clpX-like, mitochondrial		0.337673	2.07649	1.37376	0.0588478
TM7SF2	O76062	O76062	ERG24_HUMAN	Delta(14)-sterol reductase TM7SF2		-1.59357	-6.06925	6.97984	0
SNCG	O76070	O76070	SYUG_HUMAN	Gamma-synuclein		-0.438295	-1.95483	1.25627	0.0764054
CIAO1	O76071	O76071	CIAO1_HUMAN	Probable cytosolic iron-sulfur protein assembly protein CIAO1		0.247501	2.04662	1.34452	0.0628143
PDE5A	O76074	O76074	PDE5A_HUMAN	cGMP-specific 3',5'-cyclic phosphodiesterase		-1.0896	-5.65737	6.30384	0
SRP72	O76094	O76094	SRP72_HUMAN	Signal recognition particle subunit SRP72		0.344308	4.58793	4.61202	2.16022e-05
DDAH1	O94760	O94760	DDAH1_HUMAN	N(G),N(G)-dimethylarginine dimethylaminohydrolase 1		-0.334221	-2.28221	1.58232	0.0363351
URI1	O94763	O94763	RMP_HUMAN	Unconventional prefoldin RPB5 interactor 1		0.0402791	0.346613	0.136596	0.791783
B3GAT3	O94766	Q9NPZ5;O94766	B3GA3_HUMAN	Galactosylgalactosylxylosylprotein 3-beta-glucuronosyltransferase 3		0.460331	2.53141	1.85099	0.0190211
STK17B	O94768	O94768	ST17B_HUMAN	Serine/threonine-protein kinase 17B		0.731687	4.82165	4.97167	4.05268e-06
ECM2	O94769	O94769	ECM2_HUMAN	Extracellular matrix protein 2	ECM-glycoproteins	-1.02504	-6.19524	7.18838	0
MTA2	O94776	O94776	MTA2_HUMAN	Metastasis-associated protein MTA2		0.233165	2.95473	2.34523	0.00574144
ALDH1A2	O94788	O94788	AL1A2_HUMAN	Retinal dehydrogenase 2		-2.51016	-7.99823	10.2099	0
STK10	O94804	O94804	STK10_HUMAN	Serine/threonine-protein kinase 10		0.993633	8.53278	11.103	0
TPPP	O94811	O94811	TPPP_HUMAN	Tubulin polymerization-promoting protein		-1.07045	-4.01955	3.76872	0.0002
SLIT2	O94813	O94813	SLIT2_HUMAN	Slit homolog 2 protein	ECM-glycoproteins	-1.25599	-5.19948	5.56604	5.04414e-06
KBTBD11	O94819	O94819	KBTBB_HUMAN	Kelch repeat and BTB domain-containing protein 11		-1.66707	-8.62105	11.2498	0
LTN1	O94822	O94822	LTN1_HUMAN	E3 ubiquitin-protein ligase listerin		0.0156429	0.16292	0.0599084	0.902983
TOMM70	O94826	O94826	TOM70_HUMAN	Mitochondrial import receptor subunit TOM70		-0.16018	-2.11999	1.41684	0.0536462
IPO13	O94829	O94829	IPO13_HUMAN	Importin-13		0.1302	1.03387	0.515006	0.379564
DDHD2	O94830	O94830	DDHD2_HUMAN	Phospholipase DDHD2		-0.0111311	-0.132899	0.0483062	0.92236
MYO1D	O94832	O94832	MYO1D_HUMAN	Unconventional myosin-Id		0.636515	5.07444	5.36773	4.69484e-06
TOX4	O94842	O94842	TOX4_HUMAN	TOX high mobility group box family member 4		0.237166	1.39522	0.773993	0.219549
MICAL2	O94851	O94851	MICA2_HUMAN	[F-actin]-monooxygenase MICAL2		0.904079	3.61118	3.19564	0.000701476
SEC24D	O94855	O94855	SC24D_HUMAN	Protein transport protein Sec24D		0.714541	5.6038	6.21669	0
NFASC	O94856	O94856	NFASC_HUMAN	Neurofascin		-0.665278	-2.07952	1.37675	0.0584662
FCHSD2	O94868	O94868	FCSD2_HUMAN	F-BAR and double SH3 domains protein 2		0.364901	3.11347	2.54203	0.00352533
UFL1	O94874	Q92845;O94874	UFL1_HUMAN	E3 UFM1-protein ligase 1		0.180009	2.56292	1.88617	0.0174844
SORBS2	O94875	O94875	SRBS2_HUMAN	Sorbin and SH3 domain-containing protein 2		-0.467974	-1.33936	0.731237	0.240507
PHF14	O94880	O94880	PHF14_HUMAN	PHD finger protein 14		-0.251584	-2.09642	1.39344	0.0564407
TMEM63A	O94886	O94886	CSCL1_HUMAN	CSC1-like protein 1		0.494145	3.18951	2.63839	0.00276546
FARP2	O94887	O94887	FARP2_HUMAN	FERM, ARHGEF and pleckstrin domain-containing protein 2		0.452369	2.95028	2.3398	0.00581197
UBXN7	O94888	O94888	UBXN7_HUMAN	UBX domain-containing protein 7		-0.307656	-5.86588	6.64484	0
SUN1	O94901	O94901	SUN1_HUMAN	SUN domain-containing protein 1		-0.847435	-8.82331	11.5854	0
PLPBP	O94903	O94903	PLPHP_HUMAN	Pyridoxal phosphate homeostasis protein		0.0485691	0.652742	0.286928	0.596126
ERLIN2	O94905	O94905	ERLN2_HUMAN	Erlin-2		-0.597593	-8.10915	10.3957	0
PRPF6	O94906	O94906	PRP6_HUMAN	Pre-mRNA-processing factor 6		-0.102883	-1.44725	0.814713	0.201665
ADGRL1	O94910	O94910	AGRL1_HUMAN	Adhesion G protein-coupled receptor L1		-0.419627	-4.25175	4.10737	6.67678e-05
ABCA8	O94911	O94911	ABCA8_HUMAN	ABC-type organic anion transporter ABCA8		-1.27855	-5.19328	5.55617	5.02513e-06
PCF11	O94913	O94913	PCF11_HUMAN	Pre-mRNA cleavage complex 2 protein Pcf11		-0.142422	-0.651424	0.286219	0.59683
FRYL	O94915	O94915	FRYL_HUMAN	Protein furry homolog-like		0.288595	3.16983	2.61332	0.00295652
ENDOD1	O94919	O94919	ENDD1_HUMAN	Endonuclease domain-containing 1 protein		0.0962235	0.843169	0.395128	0.481508
GLS	O94925	O94925	GLSK_HUMAN	Glutaminase kidney isoform, mitochondrial		0.536465	4.55004	4.55436	2.13333e-05
HAUS5	O94927	O94927	HAUS5_HUMAN	HAUS augmin-like complex subunit 5		0.0305413	0.202041	0.0754148	0.882904
FBXO21	O94952	O94952	FBX21_HUMAN	F-box only protein 21		-0.279809	-1.42856	0.79999	0.207879
KDM4B	O94953	O94953	KDM4B_HUMAN	Lysine-specific demethylase 4B		0.0630134	0.202965	0.0757864	0.882527
USP19	O94966	O94966	UBP19_HUMAN	Ubiquitin carboxyl-terminal hydrolase 19		0.0806376	1.50455	0.860544	0.183287
AP2A2	O94973	O94973	AP2A2_HUMAN	AP-2 complex subunit alpha-2		0.105061	1.71506	1.03776	0.123943
SEC31A	O94979	O94979	SC31A_HUMAN	Protein transport protein Sec31A		0.521149	5.61859	6.24073	0
CLSTN1	O94985	O94985	CSTN1_HUMAN	Calsyntenin-1		-0.0645401	-0.327145	0.127998	0.804456
ARHGEF15	O94989	O94989	ARHGF_HUMAN	Rho guanine nucleotide exchange factor 15		-0.0864902	-0.585427	0.2514	0.638272
HEXIM1	O94992	O94992	HEXI1_HUMAN	Protein HEXIM1		-0.318008	-2.85912	2.22963	0.00769155
UBR5	O95071	O95071	UBR5_HUMAN	E3 ubiquitin-protein ligase UBR5		0.117434	2.00447	1.30368	0.0686002
AGFG2	O95081	O95081	AGFG2_HUMAN	Arf-GAP domain and FG repeat-containing protein 2		-0.289294	-1.62506	0.960303	0.14726
SCAF4	O95104	O95104	SCAF4_HUMAN	SR-related and CTD-associated factor 4		-0.585528	-3.08217	2.50275	0.00388113
S1PR2	O95136	O95136	S1PR2_HUMAN	Sphingosine 1-phosphate receptor 2		-0.87032	-5.96802	6.81281	0
MFN2	O95140	O95140	MFN2_HUMAN	Mitofusin-2		-0.202819	-2.82868	2.19329	0.00840049
UBE4B	O95155	O95155	UBE4B_HUMAN	Ubiquitin conjugation factor E4 B		0.0567502	0.349455	0.13786	0.790201
ZFPL1	O95159	O95159	ZFPL1_HUMAN	Zinc finger protein-like 1		0.495431	2.55334	1.87544	0.0179436
ELP1	O95163	O95163	ELP1_HUMAN	Elongator complex protein 1		-0.0357077	-0.508984	0.212756	0.686801
NDUFA3	O95167	O95167	NDUA3_HUMAN	NADH dehydrogenase [ubiquinone] 1 alpha subcomplex subunit 3		0.186657	2.20574	1.50337	0.0437062
NDUFB4	O95168	O95168	NDUB4_HUMAN	NADH dehydrogenase [ubiquinone] 1 beta subcomplex subunit 4		0.0369778	0.386243	0.154449	0.766293
NDUFB8	O95169	O95169	NDUB8_HUMAN	NADH dehydrogenase [ubiquinone] 1 beta subcomplex subunit 8, mitochondrial		0.00117531	0.0164813	0.00572378	0.989839
NDUFB2	O95178	O95178	NDUB2_HUMAN	NADH dehydrogenase [ubiquinone] 1 beta subcomplex subunit 2, mitochondrial		0.649581	2.73497	2.08292	0.0109198
NDUFA7	O95182	O95182	NDUA7_HUMAN	NADH dehydrogenase [ubiquinone] 1 alpha subcomplex subunit 7		0.173619	1.33079	0.724763	0.243664
VAMP5	O95183	O95183	VAMP5_HUMAN	Vesicle-associated membrane protein 5		-0.240902	-2.45025	1.7616	0.023612
RTN3	O95197	O95197	RTN3_HUMAN	Reticulon-3		0.188246	1.05819	0.531127	0.367211
LETM1	O95202	O95202	LETM1_HUMAN	Mitochondrial proton/calcium exchanger protein		0.341101	4.65658	4.71697	1.48423e-05
EPN2	O95208	O95208	EPN2_HUMAN	Epsin-2		-0.258732	-2.80094	2.16039	0.00912742
STBD1	O95210	O95210	STBD1_HUMAN	Starch-binding domain-containing protein 1		-0.321527	-1.90909	1.21324	0.0842821
ZRANB2	O95218	O95218	ZRAB2_HUMAN	Zinc finger Ran-binding domain-containing protein 2		-0.31187	-2.60077	1.92878	0.0159476
SNX4	O95219	O95219	SNX4_HUMAN	Sorting nexin-4		0.402729	5.57063	6.16283	0
LUC7L3	O95232	O95232	LC7L3_HUMAN	Luc7-like protein 3		-0.0332109	-0.360695	0.142886	0.783289
APOL3	O95236	O95236	APOL3_HUMAN	Apolipoprotein L3		0.357982	1.68728	1.01358	0.130924
SBF1	O95248	O95248	MTMR5_HUMAN	Myotubularin-related protein 5		-0.0414141	-0.836537	0.391168	0.485196
GOSR1	O95249	O95249	GOSR1_HUMAN	Golgi SNAP receptor complex member 1		0.146557	0.720235	0.323972	0.555299
KAT7	O95251	O95251	KAT7_HUMAN	Histone acetyltransferase KAT7		-0.655697	-3.54078	3.10002	0.000898901
ATE1	O95260	O95260	ATE1_HUMAN	Arginyl-tRNA--protein transferase 1		-0.0173151	-0.104584	0.0375989	0.939926
VAPB	O95292	O95292	VAPB_HUMAN	Vesicle-associated membrane protein-associated protein B/C		-0.0978701	-1.10753	0.564418	0.342514
SNAPIN	O95295	O95295	SNAPN_HUMAN	SNARE-associated protein Snapin		-0.07358	-0.685344	0.304643	0.57518
MPZL1	O95297	O95297	MPZL1_HUMAN	Myelin protein zero-like protein 1		-0.233884	-1.14853	0.592668	0.323951
NDUFC2	O95298	O95298	NDUC2_HUMAN	NADH dehydrogenase [ubiquinone] 1 subunit C2		0.39525	0.937512	0.452985	0.428521
NDUFA10	O95299	O95299	NDUAA_HUMAN	NADH dehydrogenase [ubiquinone] 1 alpha subcomplex subunit 10, mitochondrial		0.118228	1.55437	0.901227	0.167663
FKBP9	O95302	O95302	FKBP9_HUMAN	Peptidyl-prolyl cis-trans isomerase FKBP9		1.01921	4.8828	5.06683	4.2508e-06
CELF2	O95319	O95319	CELF2_HUMAN	CUGBP Elav-like family member 2		0.0109172	0.0733696	0.0260577	0.958038
PGLS	O95336	O95336	6PGL_HUMAN	6-phosphogluconolactonase		0.237121	2.14646	1.44332	0.0503865
PAPSS2	O95340	O95340	PAPS2_HUMAN	Bifunctional 3'-phosphoadenosine 5'-phosphosulfate synthase 2		0.712148	4.94	5.15623	4.41989e-06
SMC2	O95347	O95347	SMC2_HUMAN	Structural maintenance of chromosomes protein 2		1.08135	4.0658	3.83548	0.000163036
ATG7	O95352	O95352	ATG7_HUMAN	Ubiquitin-like modifier-activating enzyme ATG7		0.270379	4.47328	4.43815	3.05603e-05
TACC2	O95359	O95359	TACC2_HUMAN	Transforming acidic coiled-coil-containing protein 2		0.327479	1.58833	0.929414	0.1577
FARS2	O95363	O95363	SYFM_HUMAN	Phenylalanine--tRNA ligase, mitochondrial		-0.0152264	-0.127514	0.0462524	0.925899
LYPLA2	O95372	O95372	LYPA2_HUMAN	Acyl-protein thioesterase 2		1.13024	7.07022	8.65091	0
IPO7	O95373	O95373	IPO7_HUMAN	Importin-7		0.393104	5.06778	5.3572	4.662e-06
ARIH2	O95376	O95376	ARI2_HUMAN	E3 ubiquitin-protein ligase ARIH2		0.0830435	0.762701	0.348012	0.530369
MAP3K6	O95382	O95382	M3K6_HUMAN	Mitogen-activated protein kinase kinase kinase 6		0.261656	2.31965	1.62158	0.0331053
GDF11	O95390	O95390	GDF11_HUMAN	Growth/differentiation factor 11	Secreted-factors	-0.56856	-1.72639	1.04769	0.121386
PGM3	O95394	O95394	AGM1_HUMAN	Phosphoacetylglucosamine mutase		0.473059	5.10518	5.41634	4.81348e-06
MOCS3	O95396	O95396	MOCS3_HUMAN	Adenylyltransferase and sulfurtransferase MOCS3		-0.171942	-1.44036	0.809273	0.203911
CD2BP2	O95400	O95400	CD2B2_HUMAN	CD2 antigen cytoplasmic tail-binding protein 2		-0.102784	-1.45646	0.822004	0.198861
SVIL	O95425	O95425	SVIL_HUMAN	Supervillin		-0.276821	-2.09463	1.39166	0.056573
PAPLN	O95428	O95428	PPN_HUMAN	Papilin	ECM-glycoproteins	-1.00359	-5.55228	6.13307	0
AHSA1	O95433	O95433	AHSA1_HUMAN	Activator of 90 kDa heat shock protein ATPase homolog 1		0.202274	2.7668	2.12016	0.0100397
APOM	O95445	O95445	APOM_HUMAN	Apolipoprotein M		0.1155	0.545705	0.231094	0.663356
PARN	O95453	O95453	PARN_HUMAN	Poly(A)-specific ribonuclease PARN		-0.115873	-0.628819	0.27414	0.610446
PSMG1	O95456	O95456	PSMG1_HUMAN	Proteasome assembly chaperone 1		0.269733	2.16435	1.46134	0.0483074
FMNL1	O95466	O95466	FMNL1_HUMAN	Formin-like protein 1		1.017	7.22366	8.90877	0
SGPL1	O95470	O95470	SGPL1_HUMAN	Sphingosine-1-phosphate lyase 1		1.08022	6.19173	7.18257	0
CTDNEP1	O95476	O95476	CNEP1_HUMAN	CTD nuclear envelope phosphatase 1		-0.0768483	-0.57982	0.248504	0.641785
ABCA1	O95477	O95477	ABCA1_HUMAN	Phospholipid-transporting ATPase ABCA1		-0.340316	-1.24282	0.659684	0.28091
H6PD	O95479	O95479	G6PE_HUMAN	GDH/6PGL endoplasmic bifunctional protein		-0.0041152	-0.0576653	0.0203545	0.967425
SEC24A	O95486	O95486	SC24A_HUMAN	Protein transport protein Sec24A		0.682608	5.69681	6.36813	0
SEC24B	O95487	O95487	SC24B_HUMAN	Protein transport protein Sec24B		0.0361034	0.847181	0.397531	0.479575
ADGRL2	O95490	O95490	AGRL2_HUMAN	Adhesion G protein-coupled receptor L2		-0.0845008	-0.307785	0.119559	0.81558
MPC2	O95563	O95563	MPC2_HUMAN	Mitochondrial pyruvate carrier 2		-0.0735386	-0.31323	0.121921	0.812661
ETHE1	O95571	O95571	ETHE1_HUMAN	Persulfide dioxygenase ETHE1, mitochondrial		0.47275	4.89811	5.09073	4.29185e-06
ACSL3	O95573	O95573	ACSL3_HUMAN	Fatty acid CoA ligase Acsl3		0.122651	1.83799	1.1476	0.0974674
POLR1A	O95602	O95602	RPA1_HUMAN	DNA-directed RNA polymerase I subunit RPA1		-0.0286443	-0.310465	0.12072	0.813947
PCNT	O95613	O95613	PCNT_HUMAN	Pericentrin		0.152054	1.47749	0.838766	0.192086
ADCY5	O95622	O95622	ADCY5_HUMAN	Adenylate cyclase type 5		-0.274374	-1.41866	0.792234	0.211196
STAMBP	O95630	O95630	STABP_HUMAN	STAM-binding protein		0.0421529	0.718062	0.322757	0.556522
NFATC1	O95644	O95644	NFAC1_HUMAN	Nuclear factor of activated T-cells, cytoplasmic 1		0.274217	2.1983	1.49577	0.0445032
ASMTL	O95671	O95671	ASML_HUMAN	Probable bifunctional dTTP/UTP pyrophosphatase/methyltransferase protein		0.0578284	0.355424	0.140525	0.786307
CDS2	O95674	O95674	CDS2_HUMAN	Phosphatidate cytidylyltransferase 2		0.40927	1.70134	1.02579	0.127307
CEP43	O95684	O95684	CEP43_HUMAN	Centrosomal protein 43		-0.0118857	-0.0403009	0.0141284	0.977434
PPP1R3D	O95685	O95685	PPR3D_HUMAN	Protein phosphatase 1 regulatory subunit 3D		-0.186846	-1.02082	0.50643	0.386361
BRD1	O95696	O95696	BRD1_HUMAN	Bromodomain-containing protein 1		-0.455256	-4.31823	4.20589	5.33752e-05
HERC2	O95714	O95714	HERC2_HUMAN	E3 ubiquitin-protein ligase HERC2		0.565014	2.68425	2.02411	0.0126445
RAB3D	O95716	P20337;O95716;Q96E17	RAB3D_HUMAN	Ras-related protein Rab-3D		0.165767	1.50491	0.860836	0.183194
SNAP29	O95721	O95721	SNP29_HUMAN	Synaptosomal-associated protein 29		0.187039	2.54713	1.86851	0.0182268
OXSR1	O95747	O95747	OXSR1_HUMAN	Serine/threonine-protein kinase OSR1		0.339145	5.2787	5.69244	0
GGPS1	O95749	O95749	GGPPS_HUMAN	Geranylgeranyl pyrophosphate synthase		-0.0598049	-0.555884	0.236251	0.65788
HSPA4L	O95757	O95757	HS74L_HUMAN	Heat shock 70 kDa protein 4L		-0.186714	-0.68576	0.304872	0.575053
PTBP3	O95758	O95758	PTBP3_HUMAN	Polypyrimidine tract-binding protein 3		0.711826	2.59349	1.92056	0.0162406
IL33	O95760	O95760	IL33_HUMAN	Interleukin-33		-1.30362	-5.69077	6.35827	0
STARD3NL	O95772	O95772	STR3N_HUMAN	STARD3 N-terminal-like protein		0.0272115	0.19819	0.0738688	0.885057
LSM8	O95777	O95777	LSM8_HUMAN	U6 snRNA-associated Sm-like protein LSm8		-0.104185	-1.19615	0.626157	0.3016
AP2A1	O95782	O95782	AP2A1_HUMAN	AP-2 complex subunit alpha-1		-0.0168542	-0.243756	0.0924381	0.856228
WIZ	O95785	O95785	WIZ_HUMAN	Protein Wiz		-0.189434	-1.01	0.499367	0.391593
RIGI	O95786	O95786	RIGI_HUMAN	Antiviral innate immune response receptor RIG-I		0.606884	6.08383	7.00392	0
STAU1	O95793	O95793	STAU1_HUMAN	Double-stranded RNA-binding protein Staufen homolog 1		0.13588	1.75118	1.06955	0.115769
TTC4	O95801	O95801	TTC4_HUMAN	Tetratricopeptide repeat protein 4		0.173593	0.648346	0.284565	0.598855
CAVIN2	O95810	O95810	CAVN2_HUMAN	Caveolae-associated protein 2		-1.7948	-7.37303	9.15991	0
BAG2	O95816	O95816	BAG2_HUMAN	BAG family molecular chaperone regulator 2		-0.0349599	-0.19492	0.0725594	0.886148
BAG3	O95817	O95817	BAG3_HUMAN	BAG family molecular chaperone regulator 3		-0.213758	-1.7323	1.05288	0.120175
MAP4K4	O95819	O95819	M4K4_HUMAN	Mitogen-activated protein kinase kinase kinase kinase 4		0.18495	1.76128	1.07851	0.113447
MLYCD	O95822	O95822	DCMC_HUMAN	Malonyl-CoA decarboxylase, mitochondrial		-0.150277	-2.07187	1.36922	0.0593866
CRYZL1	O95825	O95825	QORL1_HUMAN	Quinone oxidoreductase-like protein 1		-0.139267	-1.21313	0.638275	0.293815
AIFM1	O95831	O95831	AIFM1_HUMAN	Apoptosis-inducing factor 1, mitochondrial		-0.027024	-0.245643	0.0932202	0.855024
CLDN1	O95832	O95832	CLD1_HUMAN	Claudin-1		-0.409316	-1.45658	0.822107	0.198901
CLIC3	O95833	O95833	CLIC3_HUMAN	Chloride intracellular channel protein 3		1.05038	4.11486	3.90668	0.000143781
EML2	O95834	O95834	EMAL2_HUMAN	Echinoderm microtubule-associated protein-like 2		0.0590866	0.582893	0.25009	0.640257
GNA14	O95837	O95837	GNA14_HUMAN	Guanine nucleotide-binding protein subunit alpha-14		-0.516051	-1.9474	1.24924	0.0776757
NUDT14	O95848	O95848	NUD14_HUMAN	Uridine diphosphate glucose pyrophosphatase NUDT14		0.19283	0.830271	0.387439	0.4892
BPNT1	O95861	O95861	BPNT1_HUMAN	3'(2'),5'-bisphosphate nucleotidase 1		-0.0260553	-0.273629	0.104941	0.83817
DDAH2	O95865	O95865	DDAH2_HUMAN	N(G),N(G)-dimethylarginine dimethylaminohydrolase 2		-0.700376	-5.82509	6.57791	0
ABHD16A	O95870	O95870	ABHGA_HUMAN	Phosphatidylserine lipase ABHD16A		-0.0362823	-0.46052	0.189186	0.717605
C6orf47	O95873	O95873	CF047_HUMAN	Uncharacterized protein C6orf47		-0.02974	-0.27603	0.105957	0.836841
TXNDC12	O95881	O95881	TXD12_HUMAN	Thioredoxin domain-containing protein 12		0.306913	2.93835	2.32526	0.00605359
SYF2	O95926	O95926	SYF2_HUMAN	Pre-mRNA-splicing factor SYF2		-0.271167	-1.53149	0.882449	0.174561
CBX7	O95931	O95931	CBX7_HUMAN	Chromobox protein homolog 7		-0.94124	-6.57432	7.81962	0
EFEMP2	O95967	O95967	FBLN4_HUMAN	EGF-containing fibulin-like extracellular matrix protein 2	ECM-glycoproteins	0.184134	1.22098	0.64391	0.29076
SCGB1D2	O95969	O95969	SG1D2_HUMAN	Secretoglobin family 1D member 2		0.0770763	0.247014	0.0937892	0.854277
RECK	O95980	O95980	RECK_HUMAN	Reversion-inducing cysteine-rich protein with Kazal motifs		-0.882877	-6.3639	7.46862	0
MBD3	O95983	O95983	MBD3_HUMAN	Methyl-CpG-binding domain protein 3		-0.160139	-0.839044	0.392663	0.483755
NUDT3	O95989	O95989	NUDT3_HUMAN	Diphosphoinositol polyphosphate phosphohydrolase 1		-0.0762627	-1.03607	0.516455	0.378463
AGR2	O95994	O95994	AGR2_HUMAN	Anterior gradient protein 2 homolog		-2.92125	-7.30558	9.04649	0
BCL10	O95999	O95999	BCL10_HUMAN	B-cell lymphoma/leukemia 10		0.108635	0.733607	0.331481	0.547362
NDUFB10	O96000	O96000	NDUBA_HUMAN	NADH dehydrogenase [ubiquinone] 1 beta subcomplex subunit 10		0.170135	1.90294	1.2075	0.0853646
CLPTM1	O96005	O96005	CLPT1_HUMAN	Putative lipid scramblase CLPTM1		0.134507	1.32007	0.716701	0.247772
ZBED1	O96006	O96006	ZBED1_HUMAN	E3 SUMO-protein ligase ZBED1		0.100667	0.666735	0.294491	0.586825
TOMM40	O96008	O96008	TOM40_HUMAN	Mitochondrial import receptor subunit TOM40 homolog		0.262953	3.43574	2.95924	0.0012549
PEX11B	O96011	O96011	PX11B_HUMAN	Peroxisomal membrane protein 11B		0.27375	2.27329	1.57303	0.0371619
PAK4	O96013	O96013	PAK4_HUMAN	Serine/threonine-protein kinase PAK 4		-0.414156	-4.50722	4.48943	3.1115e-05
WNT11	O96014	O96014	WNT11_HUMAN	Protein Wnt-11	Secreted-factors	0.065046	0.263926	0.100852	0.843318
ACTL6A	O96019	O96019	ACL6A_HUMAN	Actin-like protein 6A		0.0381023	0.560562	0.238632	0.654776
MT-CYB	P00156	P00156	CYB_HUMAN	Cytochrome b		-0.320258	-2.87194	2.245	0.00742217
CYB5A	P00167	P00167	CYB5_HUMAN	Cytochrome b5		-0.00874607	-0.0887432	0.0317078	0.949057
ADH1B	P00325	P00325;P08319	ADH1B_HUMAN	All-trans-retinol dehydrogenase [NAD(+)] ADH1B		-1.94325	-4.2845	4.15582	6.18238e-05
LDHA	P00338	P00338	LDHA_HUMAN	L-lactate dehydrogenase A chain		0.635961	5.46335	5.98919	0
ALDH1A1	P00352	P00352	AL1A1_HUMAN	Aldehyde dehydrogenase 1A1		-1.66899	-8.0485	10.2942	0
CYB5R3	P00387	P00387	NB5R3_HUMAN	NADH-cytochrome b5 reductase 3		-0.459669	-5.29136	5.71271	0
GSR	P00390	P00390	GSHR_HUMAN	Glutathione reductase, mitochondrial		0.0461942	0.53419	0.2253	0.670215
MT-CO1	P00395	P00395	COX1_HUMAN	Cytochrome c oxidase subunit 1		0.141993	0.705924	0.315998	0.563215
MT-CO2	P00403	P00403	COX2_HUMAN	Cytochrome c oxidase subunit 2		0.173962	2.55771	1.88033	0.0177254
SOD1	P00441	P00441	SODC_HUMAN	Superoxide dismutase [Cu-Zn]		-0.390388	-3.9407	3.65573	0.000255875
CP	P00450	P00450	CERU_HUMAN	Ceruloplasmin		-0.464657	-2.5403	1.86089	0.0185644
F13A1	P00488	P00488	F13A_HUMAN	Coagulation factor XIII A chain	ECM-regulators	1.33298	7.07742	8.663	0
PNP	P00491	P00491	PNPH_HUMAN	Purine nucleoside phosphorylase		1.25822	6.63068	7.91385	0
HPRT1	P00492	P00492	HPRT_HUMAN	Hypoxanthine-guanine phosphoribosyltransferase		0.193849	1.70852	1.03204	0.125613
GOT2	P00505	P00505	AATM_HUMAN	Aspartate aminotransferase, mitochondrial		-0.227514	-2.18098	1.47816	0.046408
ABL1	P00519	P00519	ABL1_HUMAN	Tyrosine-protein kinase ABL1		-0.228103	-2.12246	1.41931	0.0533965
EGFR	P00533	P00533	EGFR_HUMAN	Epidermal growth factor receptor		-0.978431	-9.35913	12.4677	0
PGK1	P00558	P00558	PGK1_HUMAN	Phosphoglycerate kinase 1		0.289839	2.78022	2.13594	0.00964246
AK1	P00568	P00568	KAD1_HUMAN	Adenylate kinase isoenzyme 1		-0.58203	-4.58832	4.61262	2.16216e-05
F2	P00734	P00734	THRB_HUMAN	Prothrombin	ECM-regulators	-0.299156	-1.64737	0.979264	0.141453
C1R	P00736	P00736	C1R_HUMAN	Complement C1r subcomponent		0.138952	0.994615	0.489381	0.399502
HP	P00738	P00738	HPT_HUMAN	Haptoglobin		0.11071	0.354869	0.140277	0.786506
HPR	P00739	P00739	HPTR_HUMAN	Haptoglobin-related protein		-0.00120272	-0.00462281	0.00159792	0.997426
F9	P00740	P00740	FA9_HUMAN	Coagulation factor IX	ECM-regulators	-0.210979	-0.916086	0.439597	0.440077
F10	P00742	P00742	FA10_HUMAN	Coagulation factor X	ECM-regulators	-0.0985351	-0.439779	0.179318	0.731501
CFD	P00746	P00746	CFAD_HUMAN	Complement factor D		-0.589104	-3.37656	2.88092	0.00148049
F12	P00748	P00748	FA12_HUMAN	Coagulation factor XII	ECM-regulators	-0.228597	-1.33283	0.726303	0.242917
PLAT	P00750	P00750	TPA_HUMAN	Tissue-type plasminogen activator	ECM-regulators	-0.699398	-2.98704	2.38481	0.00523037
CFB	P00751	P00751	CFAB_HUMAN	Complement factor B		-0.330042	-1.78476	1.09947	0.108436
ADA	P00813	P00813	ADA_HUMAN	Adenosine deaminase		0.643498	4.71128	4.80099	1.15053e-05
MT-ATP6	P00846	P00846	ATP6_HUMAN	ATP synthase subunit a		-0.067612	-0.518842	0.217638	0.679971
CA1	P00915	P00915	CAH1_HUMAN	Carbonic anhydrase 1		0.743944	1.59692	0.936595	0.155354
CA2	P00918	P00918	CAH2_HUMAN	Carbonic anhydrase 2		0.780544	2.24014	1.53868	0.0402132
ASS1	P00966	P00966	ASSY_HUMAN	Argininosuccinate synthase		0.236925	1.30026	0.701896	0.255808
OAS1	P00973	P00973	OAS1_HUMAN	2'-5'-oligoadenylate synthase 1		1.018	4.61667	4.65587	1.82482e-05
SERPINC1	P01008	P01008	ANT3_HUMAN	Antithrombin-III	ECM-regulators	-0.981944	-5.60413	6.21722	0
SERPINA1	P01009	P01009	A1AT_HUMAN	Alpha-1-antitrypsin	ECM-regulators	-0.647613	-2.95748	2.34859	0.00569323
SERPINA3	P01011	P01011	AACT_HUMAN	Alpha-1-antichymotrypsin	ECM-regulators	-0.749625	-3.47128	3.00661	0.00113519
AGT	P01019	P01019	ANGT_HUMAN	Angiotensinogen	ECM-regulators	-0.731058	-3.82921	3.49782	0.000358879
A2M	P01023	P20742;P01023	A2MG_HUMAN	Alpha-2-macroglobulin	ECM-regulators	-0.0208308	-0.0833022	0.0297005	0.952643
C3	P01024	P01024	CO3_HUMAN	Complement C3		-0.364832	-2.0025	1.30178	0.0688561
C5	P01031	P01031	CO5_HUMAN	Complement C5		-0.133252	-0.724604	0.326419	0.552565
TIMP1	P01033	P01033	TIMP1_HUMAN	Metalloproteinase inhibitor 1	ECM-regulators	0.822724	3.93904	3.65336	0.000255541
CST3	P01034	P01034	CYTC_HUMAN	Cystatin-C	ECM-regulators	0.0447855	0.386843	0.154723	0.7659
CST4	P01036	P01036;P01037;P09228	CYTS_HUMAN	Cystatin-S	ECM-regulators	0.614384	2.82564	2.18967	0.00846285
CSTA	P01040	P01040	CYTA_HUMAN	Cystatin-A	ECM-regulators	0.741223	2.70151	2.04404	0.0119814
KNG1	P01042	P01042	KNG1_HUMAN	Kininogen-1	ECM-regulators	-0.503743	-2.61951	1.95003	0.015127
NRAS	P01111	P01111;P01112	RASN_HUMAN	GTPase NRas		0.0267867	0.404867	0.163002	0.753576
KRAS	P01116	P01116	RASK_HUMAN	GTPase KRas		-0.191905	-2.45381	1.76548	0.0234162
TGFB1	P01137	P01137	TGFB1_HUMAN	Transforming growth factor beta-1 proprotein	Secreted-factors	1.06245	6.66031	7.96341	0
IGF2	P01344	P01344	IGF2_HUMAN	Insulin-like growth factor II	Secreted-factors	-0.256682	-1.31563	0.713373	0.249534
JCHAIN	P01591	P01591	IGJ_HUMAN	Immunoglobulin J chain		0.0424423	0.187898	0.069758	0.890156
IGKV1-33;IGKV1D-33	P01593;P01594	P01593;P01594	KV133_HUMAN;KVD33_HUMAN	Immunoglobulin kappa variable 1D-33		-0.627926	-2.10055	1.39753	0.0559462
IGKV1-39;IGKV1D-39	P01597;P04432	P04432;P01597;A0A0C4DH73;A0A0C4DH72;P01611	KV139_HUMAN;KVD39_HUMAN	Immunoglobulin kappa variable 1-39		-0.401076	-1.55408	0.900993	0.167738
IGKV1-17	P01599	P01599	KV117_HUMAN	Immunoglobulin kappa variable 1-17		-0.306235	-0.984002	0.482538	0.40509
IGKV1-5	P01602	P01602	KV105_HUMAN	Immunoglobulin kappa variable 1-5		0.0417978	0.182931	0.0677849	0.8932
IGKV3-20	P01619	P01619	KV320_HUMAN	Immunoglobulin kappa variable 3-20		-0.331131	-1.49067	0.849343	0.187884
IGLV1-47	P01700	P01700	LV147_HUMAN	Immunoglobulin lambda variable 1-47		-0.186413	-0.875796	0.414817	0.463978
IGLV1-51	P01701	P01701	LV151_HUMAN	Immunoglobulin lambda variable 1-51		-0.462733	-2.56911	1.89312	0.0172471
IGLV1-40	P01703	P01703	LV140_HUMAN	Immunoglobulin lambda variable 1-40		-0.09772	-0.399085	0.160336	0.756774
IGLV2-11	P01706	P01709;P01706	LV211_HUMAN	Immunoglobulin lambda variable 2-11		-0.44235	-1.95512	1.25654	0.076427
IGLV3-19	P01714	P01714	LV319_HUMAN	Immunoglobulin lambda variable 3-19		0.463395	1.8854	1.1912	0.0884085
IGLV3-25	P01717	P01717	LV325_HUMAN	Immunoglobulin lambda variable 3-25		-0.144224	-0.7651	0.349387	0.52894
IGLV6-57	P01721	P01721	LV657_HUMAN	Immunoglobulin lambda variable 6-57		-0.379248	-1.30836	0.707941	0.252319
CD8A	P01732	P01732	CD8A_HUMAN	T-cell surface glycoprotein CD8 alpha chain		0.474642	2.2881	1.58846	0.0358059
IGHV1-69	P01742	P01742	HV169_HUMAN	Immunoglobulin heavy variable 1-69		-0.120047	-0.400035	0.160773	0.756339
IGHV1-46	P01743	P01743	HV146_HUMAN	Immunoglobulin heavy variable 1-46		-0.320274	-1.74172	1.06119	0.118095
IGHV3-13	P01766	P01766	HV313_HUMAN	Immunoglobulin heavy variable 3-13		-0.273449	-1.17513	0.611284	0.31158
IGHV3-30;IGHV3-30-5	P01768;P0DP03	P01768;A0A0J9YY99;P01772;P0DP03	HV330_HUMAN;HVC05_HUMAN	Immunoglobulin heavy variable 3-30		-0.311952	-1.36191	0.748379	0.23232
IGHV3-7	P01780	P01780	HV307_HUMAN	Immunoglobulin heavy variable 3-7		-0.342192	-1.48453	0.844408	0.18968
IGHV2-5	P01817	P01817	HV205_HUMAN	Immunoglobulin heavy variable 2-5		-0.107395	-0.674713	0.29883	0.581863
PIGR	P01833	P01833	PIGR_HUMAN	Polymeric immunoglobulin receptor		0.431204	1.34372	0.734538	0.23877
IGKC	P01834	P01834	IGKC_HUMAN	Immunoglobulin kappa constant		-0.36677	-1.7573	1.07498	0.114409
IGHG1	P01857	P01859;P01857	IGHG1_HUMAN	Immunoglobulin heavy constant gamma 1		-0.367942	-1.61407	0.951018	0.150296
IGHG2	P01859	P01859	IGHG2_HUMAN	Immunoglobulin heavy constant gamma 2		-0.497096	-2.54459	1.86567	0.0183787
IGHG3	P01860	P01860	IGHG3_HUMAN	Immunoglobulin heavy constant gamma 3		-0.0760494	-0.331374	0.129856	0.80201
IGHG4	P01861	P01861	IGHG4_HUMAN	Immunoglobulin heavy constant gamma 4		-0.606155	-1.84431	1.15337	0.0961483
IGHM	P01871	P01871	IGHM_HUMAN	Immunoglobulin heavy constant mu		0.351494	1.24256	0.659498	0.280989
IGHA1	P01876	P01877;P01876	IGHA1_HUMAN	Immunoglobulin heavy constant alpha 1		-0.466245	-0.980162	0.480071	0.407127
IGHA2	P01877	P01877	IGHA2_HUMAN	Immunoglobulin heavy constant alpha 2		-0.450384	-1.2169	0.640978	0.292289
IGHD	P01880	P01880	IGHD_HUMAN	Immunoglobulin heavy constant delta		-0.27465	-0.601696	0.259857	0.627763
HLA-B	P01889	P01889;P04439	HLAB_HUMAN	HLA class I histocompatibility antigen, B alpha chain		0.925943	6.14912	7.11196	0
HLA-H	P01893	P01893	HLAH_HUMAN	Putative HLA class I histocompatibility antigen, alpha chain H		0.819947	3.32276	2.81038	0.00183626
HLA-DRA	P01903	P01903;P01906	DRA_HUMAN	HLA class II histocompatibility antigen, DR alpha chain		0.648088	2.74725	2.09725	0.0105662
HLA-DQA1	P01909	P01909	DQA1_HUMAN	HLA class II histocompatibility antigen, DQ alpha 1 chain		1.18601	3.7937	3.44801	0.000395092
HLA-DRB1	P01911	P01911	DRB1_HUMAN	HLA class II histocompatibility antigen, DRB1 beta chain		0.775521	3.52696	3.08137	0.000942466
HLA-DQB1	P01920	P01920	DQB1_HUMAN	HLA class II histocompatibility antigen, DQ beta 1 chain		1.15732	2.96645	2.35955	0.00556387
HBD	P02042	P02042	HBD_HUMAN	Hemoglobin subunit delta		0.664482	1.2917	0.695546	0.25907
COL1A1	P02452	P02452	CO1A1_HUMAN	Collagen alpha-1(I) chain	Collagens	-0.435873	-2.47635	1.79015	0.0220613
COL3A1	P02461	P02461	CO3A1_HUMAN	Collagen alpha-1(III) chain	Collagens	-1.42038	-6.25513	7.28777	0
COL4A1	P02462	P02462;P29400	CO4A1_HUMAN	Collagen alpha-1(IV) chain	Collagens	-0.682385	-4.00089	3.74188	0.000205405
CRYAB	P02511	P02511	CRYAB_HUMAN	Alpha-crystallin B chain		-0.786759	-3.74566	3.38097	0.000436975
LMNA	P02545	P02545	LMNA_HUMAN	Prelamin-A/C		-0.814168	-6.38178	7.49839	0
SPTA1	P02549	P02549	SPTA1_HUMAN	Spectrin alpha chain, erythrocytic 1		0.634606	1.51742	0.870976	0.179022
APOA1	P02647	P02647	APOA1_HUMAN	Apolipoprotein A-I		-0.622448	-2.58358	1.90938	0.0166404
APOE	P02649	P02649	APOE_HUMAN	Apolipoprotein E		-0.0402656	-0.177425	0.0656063	0.89629
APOA2	P02652	P02652	APOA2_HUMAN	Apolipoprotein A-II		-0.333681	-1.42189	0.794763	0.210046
APOC1	P02654	P02654	APOC1_HUMAN	Apolipoprotein C-I		-0.408422	-1.8929	1.19815	0.0870066
APOC2	P02655	P02655	APOC2_HUMAN	Apolipoprotein C-II		-0.0201194	-0.0682109	0.0241767	0.960986
APOC3	P02656	P02656	APOC3_HUMAN	Apolipoprotein C-III		-0.17913	-0.664502	0.29328	0.588149
FGA	P02671	P02671	FIBA_HUMAN	Fibrinogen alpha chain	ECM-glycoproteins	0.844586	3.0885	2.51069	0.00380126
FGB	P02675	P02675	FIBB_HUMAN	Fibrinogen beta chain	ECM-glycoproteins	0.947832	3.22902	2.68898	0.00240654
FGG	P02679	P02679	FIBG_HUMAN	Fibrinogen gamma chain	ECM-glycoproteins	0.943492	3.13536	2.56963	0.00330387
SLC4A1	P02730	P02730	B3AT_HUMAN	Band 3 anion transport protein		0.397252	0.731402	0.330238	0.548698
CRP	P02741	P02741	CRP_HUMAN	C-reactive protein		-0.12021	-0.250288	0.0951496	0.852873
APCS	P02743	P02743	SAMP_HUMAN	Serum amyloid P-component		-0.33998	-0.854738	0.402071	0.476368
C1QA	P02745	P02745	C1QA_HUMAN	Complement C1q subcomponent subunit A	ECM-affiliated	0.265053	1.49303	0.851246	0.187168
C1QB	P02746	P02746	C1QB_HUMAN	Complement C1q subcomponent subunit B	ECM-affiliated	0.272042	1.70698	1.0307	0.125968
C1QC	P02747	P02747	C1QC_HUMAN	Complement C1q subcomponent subunit C	ECM-affiliated	0.322388	1.5592	0.905213	0.166322
APOH	P02749	P02749	APOH_HUMAN	Beta-2-glycoprotein 1		-0.531234	-2.56406	1.88745	0.0174437
LRG1	P02750	P02750	A2GL_HUMAN	Leucine-rich alpha-2-glycoprotein	ECM-glycoproteins	-0.784088	-3.26714	2.73811	0.00214873
AMBP	P02760	P02760	AMBP_HUMAN	Protein AMBP	ECM-regulators	-0.861792	-4.89969	5.09319	4.30108e-06
ORM1	P02763	P02763	A1AG1_HUMAN	Alpha-1-acid glycoprotein 1		-0.794924	-3.28801	2.76515	0.00200592
AHSG	P02765	P02765	FETUA_HUMAN	Alpha-2-HS-glycoprotein		-0.442697	-2.06885	1.36626	0.0597707
TTR	P02766	P02766	TTHY_HUMAN	Transthyretin		-0.633945	-3.2283	2.68805	0.00240922
ALB	P02768	P02768	ALBU_HUMAN	Albumin		-0.759083	-4.26513	4.12715	6.71756e-05
GC	P02774	P02774	VTDB_HUMAN	Vitamin D-binding protein		-0.612779	-3.21515	2.67117	0.00250143
PPBP	P02775	P02775	CXCL7_HUMAN	Platelet basic protein	Secreted-factors	1.03749	3.32046	2.80738	0.00185155
TFRC	P02786	P02786	TFR1_HUMAN	Transferrin receptor protein 1		0.386584	2.09957	1.39655	0.0560612
TF	P02787	P02787	TRFE_HUMAN	Serotransferrin		-0.771321	-3.46525	2.99856	0.00116274
HPX	P02790	P02790	HEMO_HUMAN	Hemopexin	ECM-affiliated	-0.757345	-3.81942	3.48407	0.000367702
FTL	P02792	P02792	FRIL_HUMAN	Ferritin light chain		0.0351835	0.110949	0.0399861	0.936167
FTH1	P02794	P02794	FRIH_HUMAN	Ferritin heavy chain		-0.371924	-1.64214	0.974802	0.142625
ESR1	P03372	P03372	ESR1_HUMAN	Estrogen receptor		-1.81032	-9.53746	12.7589	0
MT-ND1	P03886	P03886	NU1M_HUMAN	NADH-ubiquinone oxidoreductase chain 1		0.0882996	0.708738	0.31756	0.561645
MT-ND2	P03891	P03891	NU2M_HUMAN	NADH-ubiquinone oxidoreductase chain 2		0.127612	1.13599	0.583972	0.32951
MT-ND3	P03897	P03897	NU3M_HUMAN	NADH-ubiquinone oxidoreductase chain 3		0.760802	2.01406	1.31292	0.0671648
MT-ND4	P03905	P03905	NU4M_HUMAN	NADH-ubiquinone oxidoreductase chain 4		0.140668	1.39268	0.77203	0.22052
MT-ND6	P03923	P03923	NU6M_HUMAN	NADH-ubiquinone oxidoreductase chain 6		-0.0454602	-0.248569	0.0944349	0.85394
ANG	P03950	P03950	ANGI_HUMAN	Angiogenin		-0.192511	-0.917382	0.440403	0.43925
F11	P03951	P03951	FA11_HUMAN	Coagulation factor XI		0.0278669	0.135446	0.0492807	0.920947
KLKB1	P03952	P03952	KLKB1_HUMAN	Plasma kallikrein		-0.252929	-1.59127	0.931867	0.156915
SLPI	P03973	P03973	SLPI_HUMAN	Antileukoproteinase	ECM-regulators	0.272659	0.673098	0.29795	0.582918
C4BPA	P04003	P04003	C4BPA_HUMAN	C4b-binding protein alpha chain		0.554513	2.40788	1.71566	0.0263905
VTN	P04004	P04004	VTNC_HUMAN	Vitronectin	ECM-glycoproteins	-0.49193	-1.70453	1.02856	0.126524
CAT	P04040	P04040	CATA_HUMAN	Catalase		0.396571	1.50637	0.862017	0.182673
GBA1	P04062	P04062	GBA1_HUMAN	Lysosomal acid glucosylceramidase		0.878604	3.08876	2.51101	0.00380289
FUCA1	P04066	P04066	FUCO_HUMAN	Tissue alpha-L-fucosidase		0.323731	3.31313	2.79781	0.001882
PROC	P04070	P04070	PROC_HUMAN	Vitamin K-dependent protein C		-0.0512307	-0.344573	0.13569	0.793157
ALDOA	P04075	P04075	ALDOA_HUMAN	Fructose-bisphosphate aldolase A		0.225498	1.99567	1.29522	0.0699247
CSTB	P04080	P04080	CYTB_HUMAN	Cystatin-B	ECM-regulators	0.250012	1.81125	1.12331	0.10278
ANXA1	P04083	P04083	ANXA1_HUMAN	Annexin A1	ECM-affiliated	1.19559	6.53895	7.76053	0
APOB	P04114	P04114	APOB_HUMAN	Apolipoprotein B-100		0.320364	1.45745	0.822792	0.198572
NR3C1	P04150	P04150	GCR_HUMAN	Glucocorticoid receptor		-0.159908	-2.67726	2.01606	0.0128915
PRNP	P04156	P04156	PRIO_HUMAN	Major prion protein		-0.894633	-6.93701	8.42721	0
SOD2	P04179	P04179	SODM_HUMAN	Superoxide dismutase [Mn], mitochondrial		0.504756	2.29359	1.59421	0.0353555
LCAT	P04180	P04180	LCAT_HUMAN	Phosphatidylcholine-sterol acyltransferase		-0.627075	-3.40998	2.92506	0.00134796
OAT	P04181	P04181	OAT_HUMAN	Ornithine aminotransferase, mitochondrial		-0.0796861	-0.958102	0.465989	0.417844
HRG	P04196	P04196	HRG_HUMAN	Histidine-rich glycoprotein	ECM-regulators	-0.320571	-1.86091	1.16859	0.0928617
THY1	P04216	P04216	THY1_HUMAN	Thy-1 membrane glycoprotein		1.30279	5.05234	5.33283	4.63499e-06
A1BG	P04217	P04217	A1BG_HUMAN	Alpha-1B-glycoprotein		-0.801181	-3.80112	3.4584	0.000391626
CD74	P04233	P04233	HG2A_HUMAN	HLA class II histocompatibility antigen gamma chain		0.906461	3.89642	3.59275	0.000295918
VWF	P04275	P04275	VWF_HUMAN	von Willebrand factor	ECM-glycoproteins	0.551594	2.56501	1.88851	0.0174065
SHBG	P04278	P04278	SHBG_HUMAN	Sex hormone-binding globulin		-0.404445	-2.99209	2.391	0.00516696
TUBB4A	P04350	P04350	TBB4A_HUMAN	Tubulin beta-4A chain		-0.0780803	-0.472188	0.194795	0.709948
GAPDH	P04406	P04406	G3P_HUMAN	Glyceraldehyde-3-phosphate dehydrogenase		0.257476	2.23191	1.5302	0.0410213
ASL	P04424	P04424	ARLY_HUMAN	Argininosuccinate lyase		-0.182862	-2.76926	2.12305	0.0100032
IGKV1-16	P04430	P04430	KV116_HUMAN	Immunoglobulin kappa variable 1-16		-0.202867	-0.815115	0.378469	0.497593
HLA-A	P04439	P04439	HLAA_HUMAN	HLA class I histocompatibility antigen, A alpha chain		0.544777	4.01198	3.75783	0.000201361
HLA-DPB1	P04440	P04440	DPB1_HUMAN	HLA class II histocompatibility antigen, DP beta 1 chain		1.07282	2.5759	1.90074	0.0169874
ERBB2	P04626	P04626	ERBB2_HUMAN	Receptor tyrosine-protein kinase erbB-2		-0.0952312	-0.364037	0.144388	0.781785
CAPNS1	P04632	Q96L46;P04632	CPNS1_HUMAN	Calpain small subunit 1		0.0751298	0.738566	0.334279	0.544524
HSPB1	P04792	P04792	HSPB1_HUMAN	Heat shock protein beta-1		-0.496974	-3.14283	2.57908	0.00321735
CYBB	P04839	P04839	CY24B_HUMAN	Cytochrome b-245 heavy chain		1.39394	6.45949	7.62791	0
RPN1	P04843	P04843	RPN1_HUMAN	Dolichyl-diphosphooligosaccharide--protein glycosyltransferase subunit 1		0.232936	2.04106	1.33909	0.0635665
RPN2	P04844	P04844	RPN2_HUMAN	Dolichyl-diphosphooligosaccharide--protein glycosyltransferase subunit 2		0.116455	1.08309	0.547826	0.355176
GNAI2	P04899	P04899	GNAI2_HUMAN	Guanine nucleotide-binding protein G(i) subunit alpha-2		-0.189948	-2.00719	1.3063	0.0681754
SLC4A2	P04920	P04920;P48751	B3A2_HUMAN	Anion exchange protein 2		0.025375	0.104428	0.0375408	0.939758
ATP1A1	P05023	P05023	AT1A1_HUMAN	Sodium/potassium-transporting ATPase subunit alpha-1		0.000476374	0.00554512	0.00191743	0.996797
ATP1B1	P05026	P05026	AT1B1_HUMAN	Sodium/potassium-transporting ATPase subunit beta-1		-0.664723	-4.05131	3.81452	0.000167247
APP	P05067	P05067	A4_HUMAN	Amyloid-beta precursor protein		-0.0110649	-0.114894	0.0414715	0.934067
ARG1	P05089	P05089	ARGI1_HUMAN	Arginase-1		0.473642	1.67466	1.00268	0.13436
APOD	P05090	P05090	APOD_HUMAN	Apolipoprotein D		-0.117392	-0.614547	0.266596	0.619523
ALDH2	P05091	P05091;O94788	ALDH2_HUMAN	Aldehyde dehydrogenase, mitochondrial		-0.213768	-1.2965	0.699104	0.25729
ITGB3	P05106	P05106	ITB3_HUMAN	Integrin beta-3		0.57888	2.07188	1.36923	0.0594049
ITGB2	P05107	P05107	ITB2_HUMAN	Integrin beta-2		1.21317	6.14424	7.10388	0
S100A8	P05109	P05109	S10A8_HUMAN	Protein S100-A8	Secreted-factors	1.28136	3.2303	2.69062	0.00240231
HMGN1	P05114	P05114	HMGN1_HUMAN	Non-histone chromosomal protein HMG-14		0.0935057	0.460253	0.189058	0.717709
SLC25A5	P05141	P05141;P12236;P12235;Q9H0C2	ADT2_HUMAN	ADP/ATP translocase 2		0.461259	4.19889	4.02953	0.00010355
SERPINA5	P05154	P05154	IPSP_HUMAN	Plasma serine protease inhibitor	ECM-regulators	-0.676387	-4.81776	4.96563	4.04858e-06
SERPING1	P05155	P05155	IC1_HUMAN	Plasma protease C1 inhibitor	ECM-regulators	-0.197019	-1.01661	0.50368	0.3885
CFI	P05156	P05156	CFAI_HUMAN	Complement factor I		-0.315804	-2.20696	1.50462	0.0435785
F13B	P05160	P05160	F13B_HUMAN	Coagulation factor XIII B chain	ECM-regulators	0.0173891	0.0861209	0.0307393	0.950702
ISG15	P05161	P05161	ISG15_HUMAN	Ubiquitin-like protein ISG15		1.89767	7.04891	8.61511	0
MPO	P05164	P05164	PERM_HUMAN	Myeloperoxidase		0.508512	1.31366	0.7119	0.250082
PCCA	P05165	P05165	PCCA_HUMAN	Propionyl-CoA carboxylase alpha chain, mitochondrial		-0.397784	-7.09657	8.69518	0
PCCB	P05166	P05166	PCCB_HUMAN	Propionyl-CoA carboxylase beta chain, mitochondrial		-0.477416	-7.60628	9.55202	0
ALPL	P05186	P05186	PPBT_HUMAN	Alkaline phosphatase, tissue-nonspecific isozyme		1.31212	5.18806	5.54787	5.01253e-06
EIF2S1	P05198	P05198	IF2A_HUMAN	Eukaryotic translation initiation factor 2 subunit 1		0.603466	8.08843	10.3611	0
ICAM1	P05362	P05362	ICAM1_HUMAN	Intercellular adhesion molecule 1		0.660568	3.79904	3.45548	0.000391144
RPLP1	P05386	P05386	RLA1_HUMAN	Large ribosomal subunit protein P1		0.274572	2.3628	1.66732	0.0297282
RPLP2	P05387	P05387	RLA2_HUMAN	Large ribosomal subunit protein P2		0.333177	2.95481	2.34533	0.0057439
RPLP0	P05388	P05388	RLA0_HUMAN	Large ribosomal subunit protein uL10		0.392325	3.39867	2.91009	0.00139221
JUN	P05412	P05412	JUN_HUMAN	Transcription factor Jun		-0.389159	-4.0246	3.77598	0.000192308
FABP3	P05413	P05413	FABPH_HUMAN	Fatty acid-binding protein, heart		-0.442565	-1.95773	1.25901	0.0759917
SSB	P05455	P05455	LA_HUMAN	Lupus La protein		0.0173703	0.19632	0.0731196	0.885755
SERPINA7	P05543	P05543	THBG_HUMAN	Thyroxine-binding globulin	ECM-regulators	-0.798141	-4.51358	4.49907	3.13043e-05
SERPIND1	P05546	P05546	HEP2_HUMAN	Heparin cofactor 2	ECM-regulators	-0.457755	-2.73596	2.08406	0.0108974
ITGB1	P05556	P05556	ITB1_HUMAN	Integrin beta-1		-0.175077	-1.43351	0.80388	0.206157
PRKCB	P05771	P05771	KPCB_HUMAN	Protein kinase C beta type		-0.0968277	-0.487422	0.202181	0.699672
COL5A2	P05997	P05997	CO5A2_HUMAN	Collagen alpha-2(V) chain	Collagens	-0.936471	-5.43271	5.93975	0
UROD	P06132	P06132	DCUP_HUMAN	Uroporphyrinogen decarboxylase		0.271185	2.65583	1.99145	0.013695
INSR	P06213	P06213	INSR_HUMAN	Insulin receptor		0.135465	1.00836	0.498298	0.392344
FYN	P06241	P06241	FYN_HUMAN	Tyrosine-protein kinase Fyn		-0.13197	-1.57455	0.917936	0.161437
BCHE	P06276	P06276	CHLE_HUMAN	Cholinesterase		-0.786698	-3.44174	2.96721	0.00123355
GLA	P06280	P06280	AGAL_HUMAN	Alpha-galactosidase A		0.296083	3.20543	2.65873	0.00262488
IGKV2-30	P06310	P06310	KV230_HUMAN	Immunoglobulin kappa variable 2-30		-0.261657	-1.06458	0.535392	0.364002
IGKV4-1	P06312	P06312	KV401_HUMAN	Immunoglobulin kappa variable 4-1		-0.203842	-0.756236	0.344316	0.533583
HLA-DOA	P06340	P06340	DOA_HUMAN	HLA class II histocompatibility antigen, DO alpha chain		0.639876	3.41155	2.92714	0.00134241
RB1	P06400	P06400	RB_HUMAN	Retinoblastoma-associated protein		0.577458	3.26509	2.73546	0.00216512
PGR	P06401	P06401	PRGR_HUMAN	Progesterone receptor		-1.36797	-4.86147	5.03359	4.18848e-06
PTMA	P06454	P06454	PTMA_HUMAN	Prothymosin alpha		0.79422	3.89388	3.58915	0.000300829
CDK1	P06493	P06493	CDK1_HUMAN	Cyclin-dependent kinase 1		0.769198	2.48736	1.80226	0.0214145
ATP5F1B	P06576	P06576	ATPB_HUMAN	ATP synthase subunit beta, mitochondrial		-0.135238	-1.85685	1.16486	0.0935586
C2	P06681	P06681	CO2_HUMAN	Complement C2		-0.229108	-1.34584	0.736148	0.237941
S100A9	P06702	P06702	S10A9_HUMAN	Protein S100-A9	Secreted-factors	1.14061	3.07025	2.48786	0.00403402
S100A6	P06703	P06703	S10A6_HUMAN	Protein S100-A6	Secreted-factors	-0.214858	-2.23199	1.53028	0.0410308
APOA4	P06727	P06727	APOA4_HUMAN	Apolipoprotein A-IV		-0.476592	-2.21867	1.5166	0.0424395
EIF4E	P06730	P06730	IF4E_HUMAN	Eukaryotic translation initiation factor 4E		0.375255	4.10118	3.88678	0.000151105
ENO1	P06733	P06733	ENOA_HUMAN	Alpha-enolase		0.652505	5.21056	5.58369	5.10856e-06
PYGL	P06737	P06737	PYGL_HUMAN	Glycogen phosphorylase, liver form		0.144778	1.44855	0.815738	0.201246
GPI	P06744	P06744	G6PI_HUMAN	Glucose-6-phosphate isomerase		0.306151	2.52014	1.83847	0.0195864
POLB	P06746	P06746	DPOLB_HUMAN	DNA polymerase beta		1.54004	4.24689	4.1002	7.55858e-05
NPM1	P06748	P06748	NPM_HUMAN	Nucleophosmin		0.257822	2.81496	2.17699	0.00873978
TPM3	P06753	P06753	TPM3_HUMAN	Tropomyosin alpha-3 chain		1.17344	9.8377	13.2463	0
ITGAV	P06756	P06756	ITAV_HUMAN	Integrin alpha-V		0.0927032	1.13287	0.581813	0.330933
HEXA	P06865	P06865	HEXA_HUMAN	Beta-hexosaminidase subunit alpha		0.660243	6.41768	7.55819	0
SERPINE2	P07093	P07093	GDN_HUMAN	Glia-derived nexin	ECM-regulators	0.142573	0.646578	0.283616	0.600149
EPHX1	P07099	P07099	HYEP_HUMAN	Epoxide hydrolase 1		-0.909539	-8.31777	10.7446	0
TH	P07101	P07101	TY3H_HUMAN	Tyrosine 3-monooxygenase		-0.416503	-2.14901	1.44589	0.0500477
DBI	P07108	P07108	ACBP_HUMAN	Acyl-CoA-binding protein		0.225334	1.7808	1.09592	0.109224
GPX1	P07203	P07203	GPX1_HUMAN	Glutathione peroxidase 1		0.799161	6.47935	7.66103	0
PGK2	P07205	P07205	PGK2_HUMAN	Phosphoglycerate kinase 2		0.100783	1.00727	0.497586	0.392728
PROS1	P07225	P07225	PROS_HUMAN	Vitamin K-dependent protein S		0.136073	0.800129	0.369673	0.507585
P4HB	P07237	P07237	PDIA1_HUMAN	Protein disulfide-isomerase		0.86739	6.10351	7.03647	0
H1-0	P07305	P07305	H10_HUMAN	Histone H1.0		-1.8517	-8.94836	11.7922	0
ACYP1	P07311	P07311	ACYP1_HUMAN	Acylphosphatase-1		-0.610624	-6.15756	7.12594	0
FES	P07332	P16591;P07332	FES_HUMAN	Tyrosine-protein kinase Fes/Fps		0.510894	3.7086	3.32955	0.000476021
CSF1R	P07333	P07333	CSF1R_HUMAN	Macrophage colony-stimulating factor 1 receptor		-0.355087	-1.8421	1.15135	0.0966655
CTSD	P07339	P07339	CATD_HUMAN	Cathepsin D	ECM-regulators	0.300598	1.98719	1.28709	0.071257
ANXA2	P07355	P07355;A6NMY6	ANXA2_HUMAN	Annexin A2	ECM-affiliated	0.32604	2.06591	1.36337	0.0601824
C8A	P07357	P07357	CO8A_HUMAN	Complement component C8 alpha chain		-0.235359	-1.40676	0.782952	0.215688
C8B	P07358	P07358	CO8B_HUMAN	Complement component C8 beta chain		-0.388913	-2.15945	1.45639	0.0488741
GP1BA	P07359	P07359	GP1BA_HUMAN	Platelet glycoprotein Ib alpha chain		0.909957	2.54787	1.86934	0.0181954
C8G	P07360	P07360	CO8G_HUMAN	Complement component C8 gamma chain		-0.386879	-2.01999	1.31865	0.0663026
CAPN1	P07384	P07384	CAN1_HUMAN	Calpain-1 catalytic subunit		-0.00233092	-0.0342555	0.0119804	0.980641
CA3	P07451	P07451	CAH3_HUMAN	Carbonic anhydrase 3		0.64435	1.53306	0.883734	0.174038
DCN	P07585	P07585	PGS2_HUMAN	Decorin	Proteoglycans	-2.11102	-7.25882	8.96788	0
PSAP	P07602	P07602	SAP_HUMAN	Prosaposin		0.197187	2.18374	1.48097	0.0460968
HEXB	P07686	P07686	HEXB_HUMAN	Beta-hexosaminidase subunit beta		0.658023	6.1339	7.08677	0
CTSL	P07711	P07711	CATL1_HUMAN	Procathepsin L		0.410081	2.94484	2.33316	0.00591475
BPGM	P07738	P07738	PMGE_HUMAN	Bisphosphoglycerate mutase		0.576981	1.88938	1.19489	0.0877107
APRT	P07741	P07741	APT_HUMAN	Adenine phosphoribosyltransferase		0.0540012	0.546474	0.231483	0.663207
CD3E	P07766	P07766	CD3E_HUMAN	T-cell surface glycoprotein CD3 epsilon chain		1.37447	5.20067	5.56793	5.05051e-06
EPRS1	P07814	P07814	SYEP_HUMAN	Bifunctional glutamate/proline--tRNA ligase		0.32563	4.51004	4.4937	3.12229e-05
CTSB	P07858	P07858	CATB_HUMAN	Cathepsin B	ECM-regulators	1.01996	6.01188	6.88511	0
HSP90AA1	P07900	P07900	HS90A_HUMAN	Heat shock protein HSP 90-alpha		0.208983	1.89639	1.2014	0.0864633
GALT	P07902	P07902	GALT_HUMAN	Galactose-1-phosphate uridylyltransferase		-0.0139819	-0.108365	0.0390157	0.937661
HNRNPC	P07910	P07910	HNRPC_HUMAN	Heterogeneous nuclear ribonucleoproteins C1/C2		0.0582517	0.596045	0.25691	0.631795
UQCRH	P07919	P07919	QCR6_HUMAN	Cytochrome b-c1 complex subunit 6, mitochondrial		0.138012	1.11183	0.567356	0.340924
LAMB1	P07942	P07942	LAMB1_HUMAN	Laminin subunit beta-1	ECM-glycoproteins	0.648706	3.63891	3.23357	0.000624064
YES1	P07947	P07947	YES_HUMAN	Tyrosine-protein kinase Yes		0.0200632	0.130841	0.0475203	0.923684
LYN	P07948	P07948	LYN_HUMAN	Tyrosine-protein kinase Lyn		0.353142	2.89891	2.27746	0.0068605
FH	P07954	P07954	FUMH_HUMAN	Fumarate hydratase, mitochondrial		0.218871	2.42855	1.73801	0.0249648
RNASE1	P07998	P07998	RNAS1_HUMAN	Ribonuclease pancreatic		0.360088	1.63909	0.972209	0.143339
ZFX;ZFY	P08048;P17010	P08048;P17010	ZFX_HUMAN;ZFY_HUMAN	Zinc finger Y-chromosomal protein		-0.255653	-1.298	0.70022	0.256745
IGF1R	P08069	P08069	IGF1R_HUMAN	Insulin-like growth factor 1 receptor		-0.584798	-3.95639	3.67813	0.000242105
ANXA6	P08133	P08133	ANXA6_HUMAN	Annexin A6	ECM-affiliated	0.180101	1.42199	0.794839	0.210058
RHOC	P08134	P08134	RHOC_HUMAN	Rho-related GTP-binding protein RhoC		0.0143151	0.117948	0.0426245	0.932118
CD55	P08174	P08174	DAF_HUMAN	Complement decay-accelerating factor		-0.235243	-0.964148	0.469833	0.41499
ABCB1	P08183	P08183	MDR1_HUMAN	ATP-dependent translocase ABCB1		-0.64886	-3.76147	3.40299	0.000420544
SERPINA6	P08185	P08185	CBG_HUMAN	Corticosteroid-binding globulin	ECM-regulators	-0.83362	-4.43198	4.37594	4.29752e-05
SLC3A2	P08195	P08195	4F2_HUMAN	4F2 cell-surface antigen heavy chain		1.2531	7.33114	9.08948	0
GUSB	P08236	P08236	BGLR_HUMAN	Beta-glucuronidase		0.672513	6.27063	7.31351	0
PFKM	P08237	P08237	PFKAM_HUMAN	ATP-dependent 6-phosphofructokinase, muscle type		-0.404617	-3.54324	3.10334	0.000894997
HSP90AB1	P08238	P08238	HS90B_HUMAN	Heat shock protein HSP 90-beta		0.346184	3.25033	2.7164	0.0022699
SRPRA	P08240	P08240	SRPRA_HUMAN	Signal recognition particle receptor subunit alpha		0.613881	6.54611	7.77248	0
ASNS	P08243	P08243	ASNS_HUMAN	Asparagine synthetase [glutamine-hydrolyzing]		1.07395	5.44535	5.96014	0
ELANE	P08246	P08246	ELNE_HUMAN	Neutrophil elastase	ECM-regulators	0.965423	1.88918	1.1947	0.0877177
MMP2	P08253	P08253	MMP2_HUMAN	72 kDa type IV collagenase	ECM-regulators	-0.207412	-1.04236	0.52061	0.375267
SOD3	P08294	P08294	SODE_HUMAN	Extracellular superoxide dismutase [Cu-Zn]		-2.46104	-9.04817	11.9569	0
CTSG	P08311	P08311	CATG_HUMAN	Cathepsin G	ECM-regulators	0.0171012	0.037693	0.0132005	0.97884
HMBS	P08397	P08397	HEM3_HUMAN	Porphobilinogen deaminase		0.465623	2.4718	1.78516	0.022312
MME	P08473	P08473	NEP_HUMAN	Neprilysin		0.0523267	0.279864	0.107584	0.834068
MGP	P08493	P08493	MGP_HUMAN	Matrix Gla protein	ECM-glycoproteins	0.411688	1.2667	0.677104	0.270126
ITGA2B	P08514	P08514	ITA2B_HUMAN	Integrin alpha-IIb		0.994452	3.08681	2.50856	0.00383032
LPA	P08519	P08519	APOA_HUMAN	Apolipoprotein(a)	ECM-regulators	1.4177	3.25025	2.71629	0.0022688
PDHA1	P08559	P08559;P29803	ODPA_HUMAN	Pyruvate dehydrogenase E1 component subunit alpha, somatic form, mitochondrial		-0.133933	-2.08932	1.38641	0.0572409
PLEK	P08567	P08567	PLEK_HUMAN	Pleckstrin		1.70352	7.69512	9.70129	0
CD14	P08571	P08571	CD14_HUMAN	Monocyte differentiation antigen CD14		0.325513	2.13819	1.43502	0.0513418
COL4A2	P08572	P08572	CO4A2_HUMAN	Collagen alpha-2(IV) chain	Collagens	-0.626307	-3.26377	2.73375	0.00217862
CYC1	P08574	P08574	CY1_HUMAN	Cytochrome c1, heme protein, mitochondrial		-0.0926131	-0.931179	0.449013	0.432169
PTPRC	P08575	P08575	PTPRC_HUMAN	Receptor-type tyrosine-protein phosphatase C		1.41121	7.37193	9.15805	0
SNRPB2	P08579	P08579	RU2B_HUMAN	U2 small nuclear ribonucleoprotein B''		0.0117275	0.136934	0.0498507	0.919978
MELTF	P08582	P08582	TRFM_HUMAN	Melanotransferrin		-0.855911	-5.06811	5.35771	4.66744e-06
MYL3	P08590	P08590	MYL3_HUMAN	Myosin light chain 3		0.179101	0.613354	0.265968	0.620302
CFH	P08603	P08603	CFAH_HUMAN	Complement factor H		0.0509229	0.312436	0.121576	0.812942
SNRNP70	P08621	P08621	RU17_HUMAN	U1 small nuclear ribonucleoprotein 70 kDa		0.0397919	0.581629	0.249437	0.641068
HCK	P08631	P08631	HCK_HUMAN	Tyrosine-protein kinase HCK		1.60323	6.37352	7.48463	0
FCGR3A	P08637	P08637;O75015	FCG3A_HUMAN	Low affinity immunoglobulin gamma Fc region receptor III-A		1.23755	6.70751	8.04243	0
ITGA5	P08648	P08648	ITA5_HUMAN	Integrin alpha-5		0.101136	0.611982	0.265247	0.621069
NFIC	P08651	Q14938;Q12857;O00712;P08651	NFIC_HUMAN	Nuclear factor 1 C-type		-1.04569	-10.579	14.432	0
SERPINF2	P08697	P08697	A2AP_HUMAN	Alpha-2-antiplasmin	ECM-regulators	-0.335457	-1.58766	0.928853	0.157846
RPS17	P08708	P08708	RS17_HUMAN	Small ribosomal subunit protein eS17		0.384918	3.67737	3.28642	0.000530828
GNAI3	P08754	P08754	GNAI3_HUMAN	Guanine nucleotide-binding protein G(i) subunit alpha-3		0.0544441	0.688498	0.306375	0.573404
ANXA5	P08758	P08758	ANXA5_HUMAN	Annexin A5	ECM-affiliated	-0.305447	-3.07576	2.49474	0.00398384
STS	P08842	P08842	STS_HUMAN	Steryl-sulfatase		-0.183927	-0.827438	0.385757	0.490632
RPSA	P08865	A0A8I5KQE6;P08865	RSSA_HUMAN	Small ribosomal subunit protein uS2		0.401147	3.74049	3.37378	0.000440191
CD63	P08962	P08962	CD63_HUMAN	CD63 antigen		0.184985	1.44983	0.816754	0.200823
MRPL3	P09001	P09001	RM03_HUMAN	Large ribosomal subunit protein uL3m		0.297021	1.48533	0.845051	0.189504
SNRPA	P09012	P09012	SNRPA_HUMAN	U1 small nuclear ribonucleoprotein A		-0.125379	-2.07829	1.37554	0.0586076
FGF2	P09038	P09038	FGF2_HUMAN	Fibroblast growth factor 2	Secreted-factors	-1.50425	-6.37811	7.49228	0
ENO2	P09104	P09104	ENOG_HUMAN	Gamma-enolase		-0.238847	-1.4885	0.847599	0.188519
HBQ1	P09105	P09105	HBAT_HUMAN	Hemoglobin subunit theta-1		0.534656	1.9525	1.25406	0.0768707
ACAA1	P09110	P09110	THIK_HUMAN	3-ketoacyl-CoA thiolase, peroxisomal		0.476939	4.03833	3.79577	0.000179806
DBH	P09172	P09172	DOPO_HUMAN	Dopamine beta-hydroxylase		-0.512118	-3.30467	2.78679	0.00191729
GSTP1	P09211	P09211	GSTP1_HUMAN	Glutathione S-transferase P		-0.121384	-1.11432	0.569055	0.339904
SNRPC	P09234	P09234	RU1C_HUMAN	U1 small nuclear ribonucleoprotein C		0.646315	2.20094	1.49846	0.0442167
LGALS1	P09382	P09382	LEG1_HUMAN	Galectin-1	ECM-affiliated	-0.151726	-0.964493	0.470053	0.414843
QDPR	P09417	P09417	DHPR_HUMAN	Dihydropteridine reductase		-0.305378	-3.68812	3.30124	0.000510288
HMGB1	P09429	P09429;P26583	HMGB1_HUMAN	High mobility group protein B1		-0.401071	-3.87785	3.56645	0.000332066
RBP1	P09455	P09455	RET1_HUMAN	Retinol-binding protein 1		-0.996918	-5.64415	6.28232	0
FBP1	P09467	O00757;P09467	F16P1_HUMAN	Fructose-1,6-bisphosphatase 1		0.668879	3.09419	2.51781	0.00375159
GNAO1	P09471	P09471	GNAO_HUMAN	Guanine nucleotide-binding protein G(o) subunit alpha		-1.32717	-5.05859	5.34269	4.65116e-06
SPARC	P09486	P09486	SPRC_HUMAN	SPARC	ECM-glycoproteins	0.889382	3.82561	3.49276	0.000358432
GSTM1	P09488	P46439;P09488	GSTM1_HUMAN	Glutathione S-transferase Mu 1		-1.59866	-4.04197	3.80104	0.000177654
TPM1	P09493	P09493	TPM1_HUMAN	Tropomyosin alpha-1 chain		0.0115924	0.0296632	0.0103556	0.982989
CLTA	P09496	P09496	CLCA_HUMAN	Clathrin light chain A		0.414285	4.17681	3.99714	0.000111601
CLTB	P09497	P09497	CLCB_HUMAN	Clathrin light chain B		-0.0232331	-0.274386	0.105262	0.837926
ANXA4	P09525	P09525	ANXA4_HUMAN	Annexin A4	ECM-affiliated	-0.151424	-1.18365	0.617299	0.307731
CNP	P09543	P09543	CN37_HUMAN	2',3'-cyclic-nucleotide 3'-phosphodiesterase		0.0191579	0.325195	0.127142	0.805596
HMOX1	P09601	P09601	HMOX1_HUMAN	Heme oxygenase 1		1.42317	6.74203	8.10024	0
PDGFRB	P09619	P09619	PGFRB_HUMAN	Platelet-derived growth factor receptor beta		-0.792708	-4.72051	4.81521	7.67754e-06
DLD	P09622	P09622	DLDH_HUMAN	Dihydrolipoyl dehydrogenase, mitochondrial		0.239695	3.09197	2.51502	0.00377717
HNRNPA1	P09651	A0A2R8Y4L2;P09651	ROA1_HUMAN	Heterogeneous nuclear ribonucleoprotein A1		0.319492	2.94226	2.33002	0.00595143
SNRPA1	P09661	P09661	RU2A_HUMAN	U2 small nuclear ribonucleoprotein A'		0.117509	1.51002	0.864968	0.18132
CTSH	P09668	P09668	CATH_HUMAN	Pro-cathepsin H	ECM-regulators	0.659491	3.6134	3.19866	0.000695455
COX6C	P09669	P09669	COX6C_HUMAN	Cytochrome c oxidase subunit 6C		0.297711	2.78732	2.1443	0.00947301
TACSTD2	P09758	P09758	TACD2_HUMAN	Tumor-associated calcium signal transducer 2		0.590629	1.9598	1.26098	0.0757315
C1S	P09871	P09871	C1S_HUMAN	Complement C1s subcomponent		0.0955141	0.607528	0.262909	0.623899
PARP1	P09874	P09874	PARP1_HUMAN	Poly [ADP-ribose] polymerase 1		0.397648	3.69685	3.31329	0.000497935
IFIT2	P09913	P09913	IFIT2_HUMAN	Interferon-induced protein with tetratricopeptide repeats 2		0.348871	2.62212	1.95299	0.0150502
IFIT1	P09914	P09914	IFIT1_HUMAN	Interferon-induced protein with tetratricopeptide repeats 1		0.782551	5.09897	5.40651	4.76758e-06
ALOX5	P09917	P09917	LOX5_HUMAN	Polyunsaturated fatty acid 5-lipoxygenase		0.905927	3.37686	2.88131	0.00148072
UCHL1	P09936	P09936	UCHL1_HUMAN	Ubiquitin carboxyl-terminal hydrolase isozyme L1		1.29797	4.70494	4.79123	1.14286e-05
LTA4H	P09960	P09960	LKHA4_HUMAN	Leukotriene A-4 hydrolase		0.229254	2.26592	1.56536	0.0377983
ALDOC	P09972	P09972	ALDOC_HUMAN	Fructose-bisphosphate aldolase C		-0.476827	-3.56279	3.12981	0.000839534
C4A	P0C0L4	P0C0L4	CO4A_HUMAN	Complement C4-A		-0.288645	-1.61792	0.954261	0.149193
H2AZ1;H2AZ2	P0C0S5;Q71UI9	P0C0S5;Q71UI9	H2AV_HUMAN;H2AZ_HUMAN	Histone H2A.Z		-0.708751	-4.69016	4.76851	1.51086e-05
FBXO45	P0C2W1	P0C2W1	FBSP1_HUMAN	F-box/SPRY domain-containing protein 1		0.235776	1.33794	0.730164	0.240885
JMJD7	P0C870	P0C870	JMJD7_HUMAN	Bifunctional peptidase and (3S)-lysyl hydroxylase JMJD7		-0.253127	-1.99388	1.2935	0.0701738
POLR2M	P0CAP2	P0CAP2	GRL1A_HUMAN	DNA-directed RNA polymerase II subunit GRINL1A		0.786597	3.1006	2.52585	0.00366757
DERPC	P0CG12	P0CG12	DERPC_HUMAN	Decreased expression in renal and prostate cancer protein		-0.14871	-0.817587	0.379927	0.496289
LIMS3;LIMS4	P0CW19;P0CW20	P0CW19;P0CW20	LIMS3_HUMAN;LIMS4_HUMAN	LIM and senescent cell antigen-like-containing domain protein 3		-0.439963	-2.15293	1.44983	0.0496347
TRAPPC2;TRAPPC2B	P0DI81;P0DI82	P0DI82;P0DI81	TPC2A_HUMAN;TPC2B_HUMAN	Trafficking protein particle complex subunit 2		-0.0461248	-0.349909	0.138063	0.790102
SULT1A3;SULT1A4	P0DMM9;P0DMN0	P0DMN0;P0DMM9	ST1A3_HUMAN;ST1A4_HUMAN	Sulfotransferase 1A3		-0.121691	-0.782798	0.359588	0.518712
HSPA1A;HSPA1B	P0DMV8;P0DMV9	P0DMV9;P0DMV8	HS71A_HUMAN;HS71B_HUMAN	Heat shock 70 kDa protein 1A		-0.951541	-7.85048	9.96214	0
IGLC2	P0DOY2	P0DOY3;P0DOY2	IGLC2_HUMAN	Immunoglobulin lambda constant 2		-0.260965	-1.07084	0.53959	0.361173
IGHV3-43D	P0DP04	P01782;P0DP04	HV43D_HUMAN	Immunoglobulin heavy variable 3-43D		-0.265114	-0.863628	0.407435	0.470849
CALM1;CALM2;CALM3	P0DP23;P0DP24;P0DP25	P0DP24;P0DP25;P0DP23	CALM1_HUMAN;CALM2_HUMAN;CALM3_HUMAN	Calmodulin-1		0.0205023	0.265345	0.101448	0.842964
POLR1D	P0DPB6	P0DPB6	RPAC2_HUMAN	DNA-directed RNA polymerases I and III subunit RPAC2		-0.0203507	-0.162306	0.0596683	0.903357
ZFTRAF1	P0DTL6	P0DTL6;E9PQ42	ZTRF1_HUMAN	Zinc finger TRAF-type-containing protein 1		-0.104098	-0.684179	0.304005	0.575785
FDX1	P10109	P10109	ADX_HUMAN	Adrenodoxin, mitochondrial		0.348149	1.49964	0.856575	0.184922
RAP2A	P10114	P10114	RAP2A_HUMAN	Ras-related protein Rap-2a		-0.0493168	-0.712639	0.319731	0.559572
SRGN	P10124	P10124	SRGN_HUMAN	Serglycin	Proteoglycans	1.85772	6.00983	6.88172	0
RNASE2	P10153	P10153	RNAS2_HUMAN	Non-secretory ribonuclease		1.49319	2.96386	2.35638	0.00560481
RO60	P10155	P10155	RO60_HUMAN	RNA-binding protein RO60		-0.0146148	-0.197583	0.0736257	0.885279
GAA	P10253	P10253	LYAG_HUMAN	Lysosomal alpha-glucosidase		0.641258	5.20943	5.58189	5.09554e-06
RRAS	P10301	P10301	RRAS_HUMAN	Ras-related protein R-Ras		-0.885684	-5.2277	5.61101	5.16796e-06
HLA-C	P10321	P10321	HLAC_HUMAN	HLA class I histocompatibility antigen, C alpha chain		0.809778	3.33333	2.8242	0.00175365
ARAF	P10398	P10398	ARAF_HUMAN	Serine/threonine-protein kinase A-Raf		0.224177	4.59736	4.6264	1.80832e-05
H1-4	P10412	Q02539;P16402;P10412;P16401;P16403	H14_HUMAN	Histone H1.4		-0.323544	-2.80913	2.17008	0.00889051
BCL2	P10415	P10415	BCL2_HUMAN	Apoptosis regulator Bcl-2		-1.09539	-7.15922	8.80047	0
DLAT	P10515	P10515	ODP2_HUMAN	Dihydrolipoyllysine-residue acetyltransferase component of pyruvate dehydrogenase complex, mitochondrial		-0.13721	-2.07442	1.37173	0.0590769
PTPRF	P10586	P10586	PTPRF_HUMAN	Receptor-type tyrosine-protein phosphatase F		-0.363387	-3.43098	2.95291	0.00127484
NR2F1	P10589	P10589	COT1_HUMAN	COUP transcription factor 1		-0.970802	-7.00796	8.54633	0
TXN	P10599	P10599	THIO_HUMAN	Thioredoxin		0.333274	2.40552	1.71311	0.0265345
TGFB3	P10600	P10600	TGFB3_HUMAN	Transforming growth factor beta-3 proprotein	Secreted-factors	0.262076	2.21834	1.51626	0.0424431
COX5B	P10606	P10606	COX5B_HUMAN	Cytochrome c oxidase subunit 5B, mitochondrial		0.322704	3.66926	3.27525	0.000542056
CTSA	P10619	P10619	PPGB_HUMAN	Lysosomal protective protein	ECM-regulators	0.961599	7.68015	9.67614	0
MGST1	P10620	P10620	MGST1_HUMAN	Microsomal glutathione S-transferase 1		0.375697	1.66943	0.998174	0.135738
C7	P10643	P10643	CO7_HUMAN	Complement component C7		-0.644856	-3.44784	2.97534	0.00121128
PRKAR1A	P10644	P10644	KAP0_HUMAN	cAMP-dependent protein kinase type I-alpha regulatory subunit		0.143016	1.98402	1.28405	0.071719
TFPI	P10646	P10646	TFPI1_HUMAN	Tissue factor pathway inhibitor		-0.771028	-4.00598	3.74919	0.000203943
UROS	P10746	P10746	HEM4_HUMAN	Uroporphyrinogen-III synthase		0.913047	3.30121	2.7823	0.00193433
ESD	P10768	P10768	ESTD_HUMAN	S-formylglutathione hydrolase		-0.289687	-2.54622	1.86749	0.0182801
HSPD1	P10809	P10809	CH60_HUMAN	60 kDa heat shock protein, mitochondrial		0.256131	2.32008	1.62203	0.0330718
CLU	P10909	P10909	CLUS_HUMAN	Clusterin		-0.668164	-2.50789	1.8249	0.0202422
HSPA5	P11021	P11021	BIP_HUMAN	Endoplasmic reticulum chaperone BiP		0.688639	4.98684	5.2297	4.51977e-06
LAMC1	P11047	P11047	LAMC1_HUMAN	Laminin subunit gamma-1	ECM-glycoproteins	-0.71979	-3.2149	2.67086	0.00250786
ACP2	P11117	P11117	PPAL_HUMAN	Lysosomal acid phosphatase		0.867216	6.96272	8.47038	0
MAP2	P11137	P11137	MTAP2_HUMAN	Microtubule-associated protein 2		0.499457	2.01395	1.31282	0.0671639
HSPA8	P11142	P11142;P54652	HSP7C_HUMAN	Heat shock cognate 71 kDa protein		0.524918	5.67055	6.32531	0
SLC2A1	P11166	P11166	GTR1_HUMAN	Solute carrier family 2, facilitated glucose transporter member 1		0.806294	2.33146	1.63404	0.0321566
SLC2A3	P11169	Q8TDB8;P11169	GTR3_HUMAN	Solute carrier family 2, facilitated glucose transporter member 3		1.09129	4.78171	4.90973	7.90514e-06
EPB41	P11171	P11171	EPB41_HUMAN	Protein 4.1		0.545305	1.81882	1.13017	0.101186
UMPS	P11172	P11172	UMPS_HUMAN	Uridine 5'-monophosphate synthase		0.333995	4.46408	4.42427	3.71308e-05
PDHB	P11177	P11177	ODPB_HUMAN	Pyruvate dehydrogenase E1 component subunit beta, mitochondrial		-0.162943	-2.02789	1.3263	0.0652255
DBT	P11182	P11182	ODB2_HUMAN	Lipoamide acyltransferase component of branched-chain alpha-keto acid dehydrogenase complex, mitochondrial		-0.20213	-3.10731	2.53428	0.00359436
ITGAM	P11215	P11215	ITAM_HUMAN	Integrin alpha-M		0.895051	4.05644	3.82194	0.000164804
PYGB	P11216	P06737;P11217;P11216	PYGB_HUMAN	Glycogen phosphorylase, brain form		-0.443294	-3.73826	3.37068	0.000442319
PYGM	P11217	P11217	PYGM_HUMAN	Glycogen phosphorylase, muscle form		-1.2006	-10.0486	13.5863	0
MBL2	P11226	P11226	MBL2_HUMAN	Mannose-binding protein C	ECM-affiliated	0.318932	1.09021	0.55264	0.351212
RALA	P11233	P11233	RALA_HUMAN	Ras-related protein Ral-A		-0.120757	-1.5522	0.899446	0.168327
RALB	P11234	P11234	RALB_HUMAN	Ras-related protein Ral-B		0.00341254	0.0397116	0.0139186	0.9776
BCR	P11274	P11274	BCR_HUMAN	Breakpoint cluster region protein		-0.0317373	-0.229068	0.0863866	0.865849
SPTB	P11277	P11277	SPTB1_HUMAN	Spectrin beta chain, erythrocytic		0.529527	1.56194	0.907478	0.16548
LAMP1	P11279	P11279	LAMP1_HUMAN	Lysosome-associated membrane glycoprotein 1		0.312032	3.39935	2.91099	0.00139022
ERG	P11308	P11308	ERG_HUMAN	Transcriptional regulator ERG		-0.361932	-1.95494	1.25637	0.0764091
ACADM	P11310	P11310	ACADM_HUMAN	Medium-chain specific acyl-CoA dehydrogenase, mitochondrial		0.369182	3.99145	3.72832	0.000215198
FGFR1	P11362	P11362;P21802;P22607;P22455	FGFR1_HUMAN	Fibroblast growth factor receptor 1		-0.665618	-3.77662	3.42412	0.000410693
TOP1	P11387	P11387	TOP1_HUMAN	DNA topoisomerase 1		0.163198	1.87964	1.18587	0.0893131
G6PD	P11413	P11413	G6PD_HUMAN	Glucose-6-phosphate 1-dehydrogenase		0.028089	0.364421	0.14456	0.781573
UBL4A	P11441	P11441	UBL4A_HUMAN	Ubiquitin-like protein 4A		-0.0465714	-0.646554	0.283603	0.600053
PC	P11498	P11498	PYC_HUMAN	Pyruvate carboxylase, mitochondrial		0.0718523	0.700217	0.312836	0.566305
DMD	P11532	P11532	DMD_HUMAN	Dystrophin		-0.842702	-4.04143	3.80025	0.000177531
MTHFD1	P11586	P11586	C1TC_HUMAN	C-1-tetrahydrofolate synthase, cytoplasmic		0.501547	5.5032	6.05358	0
IGF2R	P11717	P11717	MPRI_HUMAN	Cation-independent mannose-6-phosphate receptor		0.382984	5.5331	6.10198	0
ADH5	P11766	P11766	ADHX_HUMAN	Alcohol dehydrogenase class-3		-0.412033	-3.69573	3.31175	0.0005
CDK4	P11802	P11802	CDK4_HUMAN	Cyclin-dependent kinase 4		-0.0386754	-0.512246	0.214368	0.684505
PRPS2	P11908	P21108;P11908;P60891	PRPS2_HUMAN	Ribose-phosphate pyrophosphokinase 2		-0.00017294	-0.00201688	0.000696434	0.998819
PABPC1	P11940	P11940;Q4VXU2	PABP1_HUMAN	Polyadenylate-binding protein 1		0.522518	5.6622	6.31171	0
PCNA	P12004	P12004	PCNA_HUMAN	Proliferating cell nuclear antigen		0.460569	3.45042	2.97877	0.00120533
HARS1	P12081	P12081;P49590	HARS1_HUMAN	Histidine--tRNA ligase, cytoplasmic		0.301589	3.34441	2.8387	0.00165336
COL11A1	P12107	P12107	COBA1_HUMAN	Collagen alpha-1(XI) chain	Collagens	-1.95068	-7.5195	9.40615	0
COL6A1	P12109	P12109	CO6A1_HUMAN	Collagen alpha-1(VI) chain	Collagens	-1.35355	-7.05297	8.62193	0
COL6A2	P12110	P12110	CO6A2_HUMAN	Collagen alpha-2(VI) chain	Collagens	-1.31238	-6.78969	8.1801	0
COL6A3	P12111	P12111	CO6A3_HUMAN	Collagen alpha-3(VI) chain	Collagens	-1.26436	-6.87431	8.32199	0
SLC25A4	P12235	P12235	ADT1_HUMAN	ADP/ATP translocase 1		-0.266828	-2.21268	1.51047	0.0429945
SLC25A6	P12236	P12236	ADT3_HUMAN	ADP/ATP translocase 3		0.215921	1.98044	1.28064	0.072277
IMPDH2	P12268	P12268	IMDH2_HUMAN	Inosine-5'-monophosphate dehydrogenase 2		0.196649	2.03148	1.32979	0.0647553
TPR	P12270	P12270	TPR_HUMAN	Nucleoprotein TPR		-0.167006	-2.54339	1.86433	0.0184465
PIP	P12273	P12273	PIP_HUMAN	Prolactin-inducible protein		0.240206	0.733931	0.331663	0.547201
CKB	P12277	P12277	KCRB_HUMAN	Creatine kinase B-type		-1.94864	-5.52353	6.08649	0
FCGR1A	P12314	P12314	FCGR1_HUMAN	High affinity immunoglobulin gamma Fc receptor I		1.6032	7.14184	8.77125	0
ANXA3	P12429	P12429	ANXA3_HUMAN	Annexin A3	ECM-affiliated	0.849736	3.56856	3.13763	0.000826281
CKMT1B	P12532	P12532	KCRU_HUMAN	Creatine kinase U-type, mitochondrial		0.529804	1.91131	1.21531	0.0839977
GZMA	P12544	P12544	GRAA_HUMAN	Granzyme A		0.73757	3.59572	3.17456	0.000746907
BCKDHA	P12694	P12694	ODBA_HUMAN	2-oxoisovalerate dehydrogenase subunit alpha, mitochondrial		-0.402742	-4.44488	4.39535	4.32973e-05
RNASE3	P12724	P12724	ECP_HUMAN	Eosinophil cationic protein		0.975322	2.4092	1.71708	0.0262935
SKI	P12755	P12755	SKI_HUMAN	Ski oncogene		0.232494	1.21033	0.63627	0.295054
ACTN1	P12814	P12814;P35609	ACTN1_HUMAN	Alpha-actinin-1		0.556545	2.64767	1.98211	0.0140053
ACE	P12821	P12821	ACE_HUMAN	Angiotensin-converting enzyme		0.620252	3.0451	2.45654	0.00440302
MYL4	P12829	P12829	MYL4_HUMAN	Myosin light chain 4		1.64836	2.86977	2.24239	0.00747076
CDH1	P12830	P12830	CADH1_HUMAN	Cadherin-1		-0.259361	-1.03486	0.515659	0.378982
SRC	P12931	P12931;P07947;P06241	SRC_HUMAN	Proto-oncogene tyrosine-protein kinase Src		-0.0877663	-1.23926	0.657105	0.282657
PEPD	P12955	P12955	PEPD_HUMAN	Xaa-Pro dipeptidase		0.586592	5.27459	5.68588	0
XRCC6	P12956	P12956	XRCC6_HUMAN	X-ray repair cross-complementing protein 6		-0.264268	-3.06558	2.48203	0.00410004
XRCC5	P13010	P13010	XRCC5_HUMAN	X-ray repair cross-complementing protein 5		-0.161343	-2.11395	1.41083	0.0542066
COX4I1	P13073	P13073	COX41_HUMAN	Cytochrome c oxidase subunit 4 isoform 1, mitochondrial		0.216769	2.29374	1.59436	0.0353472
GP1BB	P13224	P13224	GP1BB_HUMAN	Platelet glycoprotein Ib beta chain		1.26416	3.72079	3.34643	0.000461081
LAMP2	P13473	P13473	LAMP2_HUMAN	Lysosome-associated membrane glycoprotein 2		0.416598	3.85719	3.53725	0.000338983
RNH1	P13489	P13489	RINI_HUMAN	Ribonuclease inhibitor		0.0170461	0.152498	0.0558515	0.910196
CYBA	P13498	P13498	CY24A_HUMAN	Cytochrome b-245 light chain		1.78686	7.47399	9.32964	0
NCAM1	P13591	P13591	NCAM1_HUMAN	Neural cell adhesion molecule 1		-1.1711	-4.47294	4.43763	3.05344e-05
ICAM2	P13598	P13598	ICAM2_HUMAN	Intercellular adhesion molecule 2		0.0380052	0.308656	0.119936	0.814981
VCAN	P13611	P13611	CSPG2_HUMAN	Versican core protein	Proteoglycans	2.42195	6.32189	7.39872	0
ITGA4	P13612	P13612	ITA4_HUMAN	Integrin alpha-4		0.985149	6.48172	7.66499	0
EEF2	P13639	P13639	EF2_HUMAN	Elongation factor 2		0.656864	6.61329	7.88476	0
PDIA4	P13667	P13667	PDIA4_HUMAN	Protein disulfide-isomerase A4		0.743179	5.08044	5.3772	4.71143e-06
C6	P13671	P13671	CO6_HUMAN	Complement component C6		-0.223648	-1.15876	0.599801	0.319221
P4HA1	P13674	P13674	P4HA1_HUMAN	Prolyl 4-hydroxylase subunit alpha-1	ECM-regulators	0.604426	3.66004	3.26257	0.000570099
ACP5	P13686	P13686	PPA5_HUMAN	Tartrate-resistant acid phosphatase type 5		0.312603	1.69763	1.02256	0.128184
CEACAM1	P13688	P06731;P31997;P13688	CEAM1_HUMAN	Carcinoembryonic antigen-related cell adhesion molecule 1		-0.202997	-0.723434	0.325763	0.553341
TPT1	P13693	Q56UQ5;P13693	TCTP_HUMAN	Translationally-controlled tumor protein		0.600314	5.87938	6.667	0
ALAD	P13716	P13716	HEM2_HUMAN	Delta-aminolevulinic acid dehydratase		0.119215	0.713665	0.320303	0.559023
HLA-E	P13747	P13747	HLAE_HUMAN	HLA class I histocompatibility antigen, alpha chain E		0.104859	1.27827	0.685617	0.264874
LCP1	P13796	P13796	PLSL_HUMAN	Plastin-2		1.41613	7.84157	9.94719	0
PLS3	P13797	P13797	PLST_HUMAN	Plastin-3		0.640558	4.61647	4.65557	1.82149e-05
APEH	P13798	P13798	ACPH_HUMAN	Acylamino-acid-releasing enzyme		0.547415	4.26783	4.13114	6.73298e-05
ETFA	P13804	P13804	ETFA_HUMAN	Electron transfer flavoprotein subunit alpha, mitochondrial		-0.0254771	-0.319108	0.124481	0.808945
GYS1	P13807	P13807	GYS1_HUMAN	Glycogen [starch] synthase, muscle		-0.384342	-4.46202	4.42116	3.70682e-05
PRKAR2A	P13861	P13861	KAP2_HUMAN	cAMP-dependent protein kinase type II-alpha regulatory subunit		-0.284231	-3.89339	3.58845	0.000300637
GTF2F2	P13984	P13984	T2FB_HUMAN	General transcription factor IIF subunit 2		0.201723	1.99671	1.29622	0.0698163
CD59	P13987	P13987	CD59_HUMAN	CD59 glycoprotein		-0.318852	-1.9553	1.25671	0.0764106
YJU2B	P13994	P13994	YJU2B_HUMAN	Probable splicing factor YJU2B		0.486971	1.37266	0.756607	0.228185
MTHFD2	P13995	P13995	MTDC_HUMAN	Bifunctional methylenetetrahydrofolate dehydrogenase/cyclohydrolase, mitochondrial		0.865617	3.625	3.21452	0.000660571
MIF	P14174	P14174	MIF_HUMAN	Macrophage migration inhibitory factor		0.297169	0.682016	0.30282	0.577314
FOLR2	P14207	P14207	FOLR2_HUMAN	Folate receptor beta		0.509573	2.3147	1.61637	0.0335275
CD99	P14209	P14209	CD99_HUMAN	CD99 antigen		-0.39809	-1.82591	1.1366	0.0998594
PRF1	P14222	P14222	PERF_HUMAN	Perforin-1		0.337743	1.68241	1.00936	0.132329
PRKCSH	P14314	P14314	GLU2B_HUMAN	Glucosidase 2 subunit beta		0.34499	3.03945	2.44952	0.0044863
HCLS1	P14317	P14317	HCLS1_HUMAN	Hematopoietic lineage cell-specific protein		1.3077	8.358	10.8117	0
FDPS	P14324	P14324	FPPS_HUMAN	Farnesyl pyrophosphate synthase		0.475449	3.94515	3.66208	0.000256209
TRIM27	P14373	P14373	TRI27_HUMAN	Zinc finger protein RFP		-0.366022	-3.22982	2.69	0.00240385
CPM	P14384	P14384	CBPM_HUMAN	Carboxypeptidase M		1.05572	5.96144	6.80197	0
COX7A2	P14406	P14406	CX7A2_HUMAN	Cytochrome c oxidase subunit 7A2, mitochondrial		0.337295	2.84995	2.21865	0.0079048
ATP1B2	P14415	P14415	AT1B2_HUMAN	Sodium/potassium-transporting ATPase subunit beta-2		-1.04164	-7.0039	8.53952	0
DRD2	P14416	P14416	DRD2_HUMAN	D(2) dopamine receptor		-0.0627734	-0.341852	0.134483	0.795
NID1	P14543	P14543	NID1_HUMAN	Nidogen-1	ECM-glycoproteins	-0.972012	-3.96816	3.69496	0.000225166
AKR1A1	P14550	P14550	AK1A1_HUMAN	Aldo-keto reductase family 1 member A1		0.122884	1.16328	0.602962	0.31721
NCF1	P14598	A8MVU1;A6NI72;P14598	NCF1_HUMAN	Neutrophil cytosol factor 1		1.06022	5.01173	5.26884	4.60299e-06
PKM	P14618	P14618	KPYM_HUMAN	Pyruvate kinase PKM		0.631009	4.87395	5.05303	4.2328e-06
ACYP2	P14621	P14621	ACYP2_HUMAN	Acylphosphatase-2		0.39643	5.2457	5.63973	0
HSP90B1	P14625	P14625	ENPL_HUMAN	Endoplasmin		0.473949	3.36597	2.86699	0.00153422
MYL6B	P14649	P14649	MYL6B_HUMAN	Myosin light chain 6B		-0.188815	-1.37425	0.757824	0.227537
SLC2A4	P14672	P14672	GLUT4_HUMAN	Solute carrier family 2, facilitated glucose transporter member 4		-1.05757	-6.4254	7.57107	0
SNRPB	P14678	P14678	RSMB_HUMAN	Small nuclear ribonucleoprotein-associated proteins B and B'		-0.00466585	-0.0455831	0.0160135	0.974188
IDE	P14735	P14735	IDE_HUMAN	Insulin-degrading enzyme		0.641377	4.31824	4.20591	5.34171e-05
MMP9	P14780	P14780	MMP9_HUMAN	Matrix metalloproteinase-9	ECM-regulators	0.46185	1.10229	0.56084	0.345034
COX6B1	P14854	P14854	CX6B1_HUMAN	Cytochrome c oxidase subunit 6B1		0.051329	0.417443	0.168837	0.745597
POU2F1	P14859	P14859;Q9UKI9	PO2F1_HUMAN	POU domain, class 2, transcription factor 1		0.19327	1.68944	1.01545	0.130427
HNRNPL	P14866	P14866	HNRPL_HUMAN	Heterogeneous nuclear ribonucleoprotein L		0.0511548	0.506967	0.211761	0.687479
DARS1	P14868	P14868	SYDC_HUMAN	Aspartate--tRNA ligase, cytoplasmic		0.267337	3.13589	2.5703	0.00329618
JUP	P14923	P14923	PLAK_HUMAN	Junction plakoglobin		0.357499	1.44875	0.815899	0.201212
UQCRB	P14927	P14927	QCR7_HUMAN	Cytochrome b-c1 complex subunit 7		-0.136155	-1.32989	0.724086	0.244012
BRAF	P15056	P15056	BRAF_HUMAN	Serine/threonine-protein kinase B-raf		0.0733413	0.593757	0.25572	0.63318
CPA3	P15088	P15088	CBPA3_HUMAN	Mast cell carboxypeptidase A		-1.60618	-2.37334	1.67857	0.0288328
FABP4	P15090	P15090	FABP4_HUMAN	Fatty acid-binding protein, adipocyte		-0.261084	-0.577797	0.247462	0.643011
GLUL	P15104	P15104	GLNA_HUMAN	Glutamine synthetase		0.58615	3.32226	2.80973	0.00183643
AKR1B1	P15121	P15121	ALDR_HUMAN	Aldo-keto reductase family 1 member B1		-0.0480518	-0.551161	0.233855	0.660557
ANPEP	P15144	P15144	AMPN_HUMAN	Aminopeptidase N		1.19119	4.77852	4.9048	7.87402e-06
PVR	P15151	P15151	PVR_HUMAN	Poliovirus receptor		-0.358393	-2.1496	1.44648	0.0499924
RAC2	P15153	P15153	RAC2_HUMAN	Ras-related C3 botulinum toxin substrate 2		1.71876	6.57685	7.82385	0
CPN1	P15169	P15169	CBPN_HUMAN	Carboxypeptidase N catalytic chain		-0.0772113	-0.378458	0.150905	0.771395
GSPT1	P15170	P15170	ERF3A_HUMAN	Eukaryotic peptide chain release factor GTP-binding subunit ERF3A		0.364596	5.16575	5.51239	4.98753e-06
PGAM2	P15259	P15259	PGAM2_HUMAN	Phosphoglycerate mutase 2		-0.179495	-0.85248	0.400713	0.477551
ARSA	P15289	P15289	ARSA_HUMAN	Arylsulfatase A		0.355068	1.99997	1.29935	0.0692802
B4GALT1	P15291	P15291	B4GT1_HUMAN	Beta-1,4-galactosyltransferase 1		0.804705	4.66165	4.72473	1.48837e-05
EZR	P15311	P15311	EZRI_HUMAN	Ezrin		0.619211	4.52075	4.50992	3.1441e-05
ATP6V1B1	P15313	P15313	VATB1_HUMAN	V-type proton ATPase subunit B, kidney isoform		0.475944	1.39861	0.776623	0.218303
UCHL3	P15374	P15374	UCHL3_HUMAN	Ubiquitin carboxyl-terminal hydrolase isozyme L3		0.421824	3.17323	2.61765	0.0029256
VAV1	P15498	P15498	VAV_HUMAN	Proto-oncogene vav		1.56514	6.6491	7.94466	0
ELN	P15502	P15502	ELN_HUMAN	Elastin	ECM-glycoproteins	0.219324	0.499405	0.208041	0.692239
NME1	P15531	P15531	NDKA_HUMAN	Nucleoside diphosphate kinase A		0.712313	5.94488	6.77471	0
NQO1	P15559	P15559	NQO1_HUMAN	NAD(P)H dehydrogenase [quinone] 1		0.240281	0.975865	0.477316	0.409278
GNS	P15586	P15586	GNS_HUMAN	N-acetylglucosamine-6-sulfatase		0.529576	6.77807	8.16063	0
PHKG2	P15735	P15735	PHKG2_HUMAN	Phosphorylase b kinase gamma catalytic chain, liver/testis isoform		-0.349974	-1.7782	1.09359	0.109775
IGLL1	P15814	P15814	IGLL1_HUMAN	Immunoglobulin lambda-like polypeptide 1		-0.477442	-1.92172	1.22505	0.0821178
ARSB	P15848	P15848	ARSB_HUMAN	Arylsulfatase B		0.587445	4.09778	3.88184	0.000153627
RPS2	P15880	P15880	RS2_HUMAN	Small ribosomal subunit protein uS5		0.50609	5.5069	6.05957	0
DSP	P15924	P15924	DESP_HUMAN	Desmoplakin		0.462361	1.49378	0.851847	0.186955
RPA2	P15927	P15927	RFA2_HUMAN	Replication protein A 32 kDa subunit		-0.166422	-2.72	2.06549	0.0113708
TIMP2	P16035	P16035	TIMP2_HUMAN	Metalloproteinase inhibitor 2	ECM-regulators	0.118668	0.871384	0.412135	0.466208
NPR1	P16066	P16066	ANPRA_HUMAN	Atrial natriuretic peptide receptor 1		-0.538767	-3.41259	2.92852	0.00133823
CD44	P16070	P16070	CD44_HUMAN	CD44 antigen		0.404218	1.84043	1.14982	0.0970373
NQO2	P16083	P16083	NQO2_HUMAN	Ribosyldihydronicotinamide dehydrogenase [quinone]		-0.157571	-0.97851	0.479011	0.407981
SELP	P16109	P16109	LYAM3_HUMAN	P-selectin		0.638426	3.64093	3.23634	0.000622478
ITGB4	P16144	P16144	ITB4_HUMAN	Integrin beta-4		-0.761557	-3.04926	2.4617	0.0043486
SPN	P16150	P16150	LEUK_HUMAN	Leukosialin		1.66573	5.2741	5.6851	0
CBR1	P16152	P16152	CBR1_HUMAN	Carbonyl reductase [NADPH] 1		-0.389523	-4.0362	3.7927	0.00018232
ANK1	P16157	P16157	ANK1_HUMAN	Ankyrin-1		0.617487	1.46657	0.830044	0.19556
ACADS	P16219	P16219	ACADS_HUMAN	Short-chain specific acyl-CoA dehydrogenase, mitochondrial		-0.27837	-2.69763	2.03956	0.0121242
CREB1	P16220	P18846;P16220	CREB1_HUMAN	Cyclic AMP-responsive element-binding protein 1		-0.298456	-2.7288	2.07573	0.011125
PDGFRA	P16234	P16234	PGFRA_HUMAN	Platelet-derived growth factor receptor alpha		-0.898133	-4.52961	4.52336	3.16067e-05
GLB1	P16278	P16278	BGAL_HUMAN	Beta-galactosidase		0.942039	8.64624	11.2917	0
PECAM1	P16284	P16284	PECA1_HUMAN	Platelet endothelial cell adhesion molecule		0.39566	3.09352	2.51697	0.00375895
PPP3CB	P16298	P16298	PP2BB_HUMAN	Serine/threonine-protein phosphatase 2B catalytic subunit beta isoform		-0.194067	-1.81881	1.13015	0.101162
NCK1	P16333	P16333	NCK1_HUMAN	Cytoplasmic protein NCK1		-0.054043	-0.851381	0.400052	0.478095
H1-5	P16401	P16401	H15_HUMAN	Histone H1.5		1.84386	9.07802	12.0061	0
EPCAM	P16422	P16422	EPCAM_HUMAN	Epithelial cell adhesion molecule		0.210118	0.689003	0.306653	0.573115
POR	P16435	P16435	NCPR_HUMAN	NADPH--cytochrome P450 reductase		-0.0416235	-0.532521	0.224462	0.671484
EPB42	P16452	P16452	EPB42_HUMAN	Protein 4.2		0.292625	0.746901	0.339001	0.539568
MGMT	P16455	P16455	MGMT_HUMAN	Methylated-DNA--protein-cysteine methyltransferase		-0.606714	-4.1311	3.93033	0.000130152
FER	P16591	P16591	FER_HUMAN	Tyrosine-protein kinase Fer		0.119187	1.08534	0.549345	0.353915
ATP2A2	P16615	P16615	AT2A2_HUMAN	Sarcoplasmic/endoplasmic reticulum calcium ATPase 2		0.170213	2.14222	1.43907	0.0508639
CD36	P16671	P16671	CD36_HUMAN	Platelet glycoprotein 4		0.0608232	0.347053	0.136792	0.791678
PLCG2	P16885	P16885	PLCG2_HUMAN	1-phosphatidylinositol 4,5-bisphosphate phosphodiesterase gamma-2		0.437327	4.11007	3.8997	0.000143472
FAH	P16930	P16930	FAAA_HUMAN	Fumarylacetoacetase		-0.173607	-1.64255	0.975151	0.14259
STMN1	P16949	P16949	STMN1_HUMAN	Stathmin		0.758148	4.40176	4.33058	4.24837e-05
YBX3	P16989	P16989	YBOX3_HUMAN	Y-box-binding protein 3		0.528668	2.85514	2.22487	0.00777796
ZNF22	P17026	P17026	ZNF22_HUMAN	Zinc finger protein 22		-0.113195	-0.935292	0.451591	0.429768
ZKSCAN1	P17029	P17029	ZKSC1_HUMAN	Zinc finger protein with KRAB and SCAN domains 1		-0.437764	-2.94193	2.32962	0.00595911
NAGA	P17050	P17050	NAGAB_HUMAN	Alpha-N-acetylgalactosaminidase		0.427247	3.70747	3.32799	0.000478107
HSPA6	P17066	P48741;P17066	HSP76_HUMAN	Heat shock 70 kDa protein 6		0.51457	4.50698	4.48906	3.10881e-05
HMGA1	P17096	P17096	HMGA1_HUMAN	High mobility group protein HMG-I/HMG-Y		1.19917	3.98671	3.72153	0.000217304
TMEM11	P17152	P17152	TMM11_HUMAN	Transmembrane protein 11, mitochondrial		-0.105389	-1.73063	1.05141	0.120497
GOT1	P17174	P17174	AATC_HUMAN	Aspartate aminotransferase, cytoplasmic		0.192803	1.81356	1.1254	0.10225
BPI	P17213	P17213	BPI_HUMAN	Bactericidal permeability-increasing protein		0.574568	1.48826	0.847404	0.188562
PRKCA	P17252	P17252	KPCA_HUMAN	Protein kinase C alpha type		-0.117932	-1.68674	1.01311	0.131051
JUNB	P17275	P17275	JUNB_HUMAN	Transcription factor JunB		0.569656	1.97728	1.27762	0.0727684
ITGA2	P17301	P17301	ITA2_HUMAN	Integrin alpha-2		0.293253	2.6618	1.99829	0.0134751
SMPD1	P17405	P17405	ASM_HUMAN	Sphingomyelin phosphodiesterase		0.366407	2.96664	2.35978	0.0055611
UBTF	P17480	P17480	UBF1_HUMAN	Nucleolar transcription factor 1		-0.0861387	-1.33923	0.731137	0.240398
HOXB6	P17509	P09630;P31267;P09067;P20719;P31274;P09629;P28356;Q00444;P17481;P31268;P31273;P17482;P17509	HXB6_HUMAN	Homeobox protein Hox-B6		-1.41243	-5.83317	6.59117	0
JUND	P17535	P17535	JUND_HUMAN	Transcription factor JunD		-0.0573514	-0.248018	0.094206	0.853963
CKMT2	P17540	P17540	KCRS_HUMAN	Creatine kinase S-type, mitochondrial		-0.448936	-2.34151	1.64468	0.031377
PRKACA	P17612	P22694;P17612	KAPCA_HUMAN	cAMP-dependent protein kinase catalytic subunit alpha		-0.168079	-2.29113	1.59163	0.0355164
CAPN2	P17655	P17655	CAN2_HUMAN	Calpain-2 catalytic subunit		0.126032	1.31894	0.715858	0.248194
DES	P17661	P17661	DESM_HUMAN	Desmin		-1.18943	-2.00441	1.30362	0.0685905
CEBPB	P17676	P17676	CEBPB_HUMAN	CCAAT/enhancer-binding protein beta		0.297305	1.42917	0.800466	0.207707
HLA-G	P17693	P17693	HLAG_HUMAN	HLA class I histocompatibility antigen, alpha chain G		0.898725	3.97458	3.70415	0.000224
PTPN2	P17706	P17706	PTN2_HUMAN	Tyrosine-protein phosphatase non-receptor type 2		0.814099	4.46886	4.43148	3.04826e-05
CTPS1	P17812	Q9NRF8;P17812	PYRG1_HUMAN	CTP synthase 1		-0.190251	-1.51528	0.869239	0.179554
ENG	P17813	P17813	EGLN_HUMAN	Endoglin		-0.103445	-0.557661	0.237155	0.65677
DDX5	P17844	P17844	DDX5_HUMAN	Probable ATP-dependent RNA helicase DDX5		0.634152	5.66991	6.32427	0
PFKL	P17858	P08237;P17858	PFKAL_HUMAN	ATP-dependent 6-phosphofructokinase, liver type		0.17986	2.11223	1.40911	0.0543945
GM2A	P17900	P17900	SAP3_HUMAN	Ganglioside GM2 activator		0.467911	2.60378	1.93219	0.0158082
LGALS3	P17931	P17931	LEG3_HUMAN	Galectin-3	ECM-affiliated	-0.446531	-4.12576	3.92255	0.00013266
FLT1	P17948	P17948	VGFR1_HUMAN	Vascular endothelial growth factor receptor 1		-0.119735	-0.702279	0.313977	0.565262
PSMC3	P17980	P17980	PRS6A_HUMAN	26S proteasome regulatory subunit 6A		0.276922	4.35359	4.25855	4.50161e-05
TCP1	P17987	P17987	TCPA_HUMAN	T-complex protein 1 subunit alpha		0.241178	3.38119	2.88702	0.00146467
PTPN1	P18031	P18031	PTN1_HUMAN	Tyrosine-protein phosphatase non-receptor type 1		0.537921	7.20058	8.86999	0
ERCC2	P18074	P18074	ERCC2_HUMAN	General transcription and DNA repair factor IIH helicase subunit XPD		0.0345062	0.262691	0.100333	0.844304
RPL35A	P18077	P18077	RL35A_HUMAN	Large ribosomal subunit protein eL33		0.426063	5.31428	5.74941	0
ITGB5	P18084	P18084	ITB5_HUMAN	Integrin beta-5		0.958527	5.46873	5.99787	0
ARF4	P18085	P18085	ARF4_HUMAN	ADP-ribosylation factor 4		0.612924	7.17721	8.8307	0
RPL7	P18124	P18124	RL7_HUMAN	Large ribosomal subunit protein uL30		0.613252	5.38692	5.86602	0
VCL	P18206	P18206	VINC_HUMAN	Vinculin		0.0144247	0.0885159	0.0316237	0.949103
LBP	P18428	P18428	LBP_HUMAN	Lipopolysaccharide-binding protein		-0.348037	-1.78297	1.09786	0.10877
PTPRA	P18433	P18433	PTPRA_HUMAN	Receptor-type tyrosine-protein phosphatase alpha		-0.472689	-7.651	9.62717	0
NAT1	P18440	P18440	ARY1_HUMAN	Arylamine N-acetyltransferase 1		0.855272	3.87814	3.56686	0.000332276
ITGB6	P18564	P18564	ITB6_HUMAN	Integrin beta-6		-0.375836	-2.52722	1.84633	0.0192523
SON	P18583	P18583	SON_HUMAN	Protein SON		-0.022314	-0.322246	0.125852	0.806859
NELFE	P18615	P18615	NELFE_HUMAN	Negative elongation factor E		-0.0150644	-0.174031	0.0642674	0.897174
RPL17	P18621	P18621	RL17_HUMAN	Large ribosomal subunit protein uL22		0.535274	5.11768	5.43614	4.85437e-06
PGAM1	P18669	P18669	PGAM1_HUMAN	Phosphoglycerate mutase 1		-0.0402173	-0.311607	0.121216	0.813385
RCC1	P18754	P18754	RCC1_HUMAN	Regulator of chromosome condensation		0.341354	3.09693	2.52125	0.00370962
SDC1	P18827	P18827	SDC1_HUMAN	Syndecan-1	ECM-affiliated	1.27315	3.93619	3.6493	0.000257477
LIG1	P18858	P18858	DNLI1_HUMAN	DNA ligase 1		0.561165	2.25421	1.55322	0.0388262
ATP5PF	P18859	P18859	ATP5J_HUMAN	ATP synthase-coupling factor 6, mitochondrial		-0.218668	-2.11561	1.41248	0.0540264
XRCC1	P18887	P18887	XRCC1_HUMAN	DNA repair protein XRCC1		-0.0864669	-1.20137	0.629878	0.299215
PAM	P19021	P19021	AMD_HUMAN	Peptidyl-glycine alpha-amidating monooxygenase		0.479287	2.56247	1.88566	0.0174994
CDH2	P19022	P19022	CADH2_HUMAN	Cadherin-2		0.765495	2.6142	1.944	0.0153228
GNAZ	P19086	P19086	GNAZ_HUMAN	Guanine nucleotide-binding protein G(z) subunit alpha		-0.992343	-4.37057	4.28391	4.52708e-05
PLCG1	P19174	P19174	PLCG1_HUMAN	1-phosphatidylinositol 4,5-bisphosphate phosphodiesterase gamma-1		-0.164841	-2.19133	1.48868	0.0452889
CD58	P19256	P19256	LFA3_HUMAN	Lymphocyte function-associated antigen 3		0.248367	1.93227	1.23497	0.0802551
VCAM1	P19320	P19320	VCAM1_HUMAN	Vascular cell adhesion protein 1		1.5283	6.18783	7.17611	0
NCL	P19338	P19338	NUCL_HUMAN	Nucleolin		-0.0315626	-0.3114	0.121126	0.813433
HK1	P19367	P19367	HXK1_HUMAN	Hexokinase-1		0.234618	2.72585	2.07229	0.0112153
POLR2C	P19387	P19387	RPB3_HUMAN	DNA-directed RNA polymerase II subunit RPB3		-0.0972813	-1.6191	0.955259	0.14897
POLR2E	P19388	P19388	RPAB1_HUMAN	DNA-directed RNA polymerases I, II, and III subunit RPABC1		0.0510839	0.721476	0.324666	0.554521
NDUFV2	P19404	P19404	NDUV2_HUMAN	NADH dehydrogenase [ubiquinone] flavoprotein 2, mitochondrial		0.0219824	0.25474	0.0970051	0.849484
GGT1	P19440	A6NGU5;P19440	GGT1_HUMAN	Glutathione hydrolase 1 proenzyme		1.0834	3.33813	2.83047	0.00170825
TRIM21	P19474	P19474	RO52_HUMAN	E3 ubiquitin-protein ligase TRIM21		0.348874	5.05719	5.34048	4.64576e-06
EIF2AK2	P19525	P19525	E2AK2_HUMAN	Interferon-induced, double-stranded RNA-activated protein kinase		0.471659	5.42021	5.9196	0
TFE3	P19532	P19532	TFE3_HUMAN	Transcription factor E3		0.0336064	0.274068	0.105127	0.838062
WT1	P19544	P19544	WT1_HUMAN	Wilms tumor protein		-0.482036	-2.86217	2.23328	0.00763306
SRM	P19623	P19623	SPEE_HUMAN	Spermidine synthase		0.222598	2.01223	1.31116	0.0673552
SLC9A1	P19634	P19634	SL9A1_HUMAN	Sodium/hydrogen exchanger 1		-0.761792	-4.26808	4.13152	6.73813e-05
ORM2	P19652	P19652	A1AG2_HUMAN	Alpha-1-acid glycoprotein 2		-0.776506	-3.66054	3.26326	0.000568102
CSNK2A2	P19784	P19784	CSK22_HUMAN	Casein kinase II subunit alpha'		-0.0221355	-0.211812	0.0793569	0.876825
RXRA	P19793	P19793	RXRA_HUMAN	Retinoic acid receptor RXR-alpha		-0.583797	-3.96145	3.68536	0.00023219
ITIH2	P19823	P19823	ITIH2_HUMAN	Inter-alpha-trypsin inhibitor heavy chain H2	ECM-regulators	0.219703	1.11589	0.570135	0.339224
ITIH1	P19827	P19827	ITIH1_HUMAN	Inter-alpha-trypsin inhibitor heavy chain H1	ECM-regulators	0.595181	2.77654	2.13161	0.00976325
NFKB1	P19838	P19838	NFKB1_HUMAN	Nuclear factor NF-kappa-B p105 subunit		0.0818711	1.17075	0.608204	0.313348
NCF2	P19878	P19878	NCF2_HUMAN	Neutrophil cytosol factor 2		1.03591	5.10344	5.41358	4.78469e-06
TYMP	P19971	P19971	TYPH_HUMAN	Thymidine phosphorylase		1.91874	8.44204	10.9519	0
ATP2B1	P20020	P20020	AT2B1_HUMAN	Plasma membrane calcium-transporting ATPase 1		0.114613	1.10732	0.564271	0.342566
HLA-DPA1	P20036	P20036	DPA1_HUMAN	HLA class II histocompatibility antigen, DP alpha 1 chain		1.1915	4.76673	4.88655	7.84314e-06
EIF2S2	P20042	P20042	IF2B_HUMAN	Eukaryotic translation initiation factor 2 subunit 2		0.670426	7.62567	9.5846	0
ANXA7	P20073	P20073	ANXA7_HUMAN	Annexin A7	ECM-affiliated	-0.0334262	-0.501552	0.209095	0.691098
AZU1	P20160	P20160	CAP7_HUMAN	Azurocidin		0.456616	0.926476	0.446071	0.434827
TBP	P20226	Q6SJ96;P20226	TBP_HUMAN	TATA-box-binding protein		-0.184436	-1.64711	0.979042	0.141464
TPSAB1;TPSB2	P20231;Q15661	Q15661;P20231	TRYB1_HUMAN;TRYB2_HUMAN	Tryptase beta-2		-2.38875	-5.15532	5.49584	4.96278e-06
BTF3	P20290	P20290	BTF3_HUMAN	Transcription factor BTF3		0.0966617	0.940641	0.454953	0.427123
ALOX5AP	P20292	P20292	AL5AP_HUMAN	Arachidonate 5-lipoxygenase-activating protein		1.44397	6.24556	7.27188	0
RAB4A	P20338	P20338	RAB4A_HUMAN	Ras-related protein Rab-4A		0.017504	0.329849	0.129185	0.802921
RAB5A	P20339	P20339	RAB5A_HUMAN	Ras-related protein Rab-5A		0.318975	4.89945	5.09283	4.29646e-06
RAB6A	P20340	Q9NRW1;P20340;Q9H0N0	RAB6A_HUMAN	Ras-related protein Rab-6A		0.324627	4.09939	3.88418	0.000153737
MSH3	P20585	P20585	MSH3_HUMAN	DNA mismatch repair protein Msh3		0.213697	0.710831	0.318724	0.560627
MX1	P20591	P20591	MX1_HUMAN	Interferon-induced GTP-binding protein Mx1		1.70252	6.19593	7.18954	0
MX2	P20592	P20592	MX2_HUMAN	Interferon-induced GTP-binding protein Mx2		1.34185	8.17409	10.5044	0
NPR2	P20594	P20594	ANPRB_HUMAN	Atrial natriuretic peptide receptor 2		-0.869185	-6.41344	7.55113	0
PSMB1	P20618	P20618	PSB1_HUMAN	Proteasome subunit beta type-1		0.235359	4.46159	4.42051	3.7037e-05
M6PR	P20645	P20645	MPRD_HUMAN	Cation-dependent mannose-6-phosphate receptor		0.418044	2.10397	1.40091	0.0554632
H2AC7	P20671	P0C0S8;P04908;Q6FI13;P20671;Q9BTM1;Q99878;Q7L7L0;Q93077;Q16777;Q96KK5	H2A1D_HUMAN	Histone H2A type 1-D		-0.433686	-5.07428	5.36747	4.68933e-06
COX5A	P20674	P20674	COX5A_HUMAN	Cytochrome c oxidase subunit 5A, mitochondrial		0.1406	1.51486	0.868896	0.179664
LMNB1	P20700	P20700	LMNB1_HUMAN	Lamin-B1		0.522443	4.42531	4.36593	4.28689e-05
ITGAL	P20701	P20701	ITAL_HUMAN	Integrin alpha-L		-0.0456004	-0.278527	0.107016	0.835082
ITGAX	P20702	P20702	ITAX_HUMAN	Integrin alpha-X		1.25136	4.52375	4.51447	3.14685e-05
PZP	P20742	P20742	PZP_HUMAN	Pregnancy zone protein	ECM-regulators	0.0401696	0.188808	0.0701204	0.889691
OGN	P20774	P20774	MIME_HUMAN	Mimecan	Proteoglycans	-3.17611	-8.64465	11.2891	0
CAST	P20810	P20810	ICAL_HUMAN	Calpastatin		0.163558	1.957	1.25832	0.0760909
IMPDH1	P20839	P20839	IMDH1_HUMAN	Inosine-5'-monophosphate dehydrogenase 1		0.905781	6.309	7.37728	0
C4BPB	P20851	P20851	C4BPB_HUMAN	C4b-binding protein beta chain		0.434696	1.51173	0.86636	0.180739
COL5A1	P20908	P20908	CO5A1_HUMAN	Collagen alpha-1(V) chain	Collagens	-0.705568	-5.19691	5.56196	5.03145e-06
AGA	P20933	P20933	ASPG_HUMAN	N(4)-(beta-N-acetylglucosaminyl)-L-asparaginase		1.08889	6.1144	7.05448	0
RASA1	P20936	P20936	RASA1_HUMAN	Ras GTPase-activating protein 1		-0.0745037	-1.42674	0.798562	0.208458
PTMS	P20962	P20962	PTMS_HUMAN	Parathymosin		0.355475	1.86964	1.17663	0.0911721
CDK11B	P21127	Q9UQ88;P21127	CD11B_HUMAN	Cyclin-dependent kinase 11B		0.180527	2.3068	1.60806	0.0341848
GSTM3	P21266	P21266	GSTM3_HUMAN	Glutathione S-transferase Mu 3		-0.795411	-4.72507	4.82224	7.71456e-06
ATP6V1B2	P21281	P21281	VATB2_HUMAN	V-type proton ATPase subunit B, brain isoform		0.539842	6.79255	8.1849	0
ATP6V1C1	P21283	P21283	VATC1_HUMAN	V-type proton ATPase subunit C 1		0.43164	4.83652	4.99478	4.09836e-06
CSRP1	P21291	P21291	CSRP1_HUMAN	Cysteine and glycine-rich protein 1		-0.163624	-0.527493	0.221948	0.675008
