# Supplementary material for: Spatial proteomics of ovarian cancer precursors delineates early disease changes and drug targets
Source: Mol Syst Biol. 2025 Nov 13;22(1):7–41. doi: 10.1038/s44320-025-00168-4 (PMC12759074; doi:10.1038/s44320-025-00168-4)
Supplement: Supplementary file 21 — Dataset EV15 [file 44320_2025_168_MOESM21_ESM.xlsx]

## Sheet: Legend
Dataset EV15. Student's t-test results used for differential abundance analysis of invasive stroma and NFT stroma samples and visualized in the volcano plot figure 5C, focusing on matrisome proteins only.

## Sheet: Dataset EV15
Gene	Protein Group	Protein ID	Protein name	First protein description	Matrisome category	T-test difference (IC stroma vs. NFTE stroma, log2)	T-test statistic	T-test p-value, (-log10)	T-test q-value, (-log10)
CLEC18A;CLEC18B;CLEC18C	A5D8T8;Q6UXF7;Q8NCF0	Q8NCF0;A5D8T8;Q6UXF7	CL18A_HUMAN;CL18B_HUMAN;CL18C_HUMAN	C-type lectin domain family 18 member A	ECM-affiliated	0.163671	0.641668	0.529305	0.435637
COL6A6	A6NMZ7	A6NMZ7	CO6A6_HUMAN	Collagen alpha-6(VI) chain	Collagens	-0.725659	-2.34344	2.99315	0.00426277
A2ML1	A8K2U0	A8K2U0	A2ML1_HUMAN	Alpha-2-macroglobulin-like protein 1	ECM-regulators	0.640583	1.13321	0.759756	0.164087
LGALS9	O00182	O00182	LEG9_HUMAN	Galectin-9	ECM-affiliated	1.1532	4.14276	7.63774	0
LGALS8	O00214	O00214	LEG8_HUMAN	Galectin-8	ECM-affiliated	-0.0317914	-0.136988	0.091177	0.880099
LEFTY2	O00292	O00292;O75610	LFTY2_HUMAN	Left-right determination factor 2	Secreted-factors	-0.998645	-2.50823	2.84537	0.00193548
MATN2	O00339	O00339	MATN2_HUMAN	Matrilin-2	ECM-glycoproteins	-0.160771	-0.559723	0.404439	0.502457
AGRN	O00468	O00468	AGRIN_HUMAN	Agrin	ECM-glycoproteins	0.0767312	0.342517	0.26878	0.688932
PLOD2	O00469	O00469	PLOD2_HUMAN	Procollagen-lysine,2-oxoglutarate 5-dioxygenase 2	ECM-regulators	1.91025	4.46039	6.56818	0
VWA5A	O00534	O00534	VMA5A_HUMAN	von Willebrand factor A domain-containing protein 5A	ECM-glycoproteins	0.277954	1.3656	2.02443	0.0925477
CCL21	O00585	O00585	CCL21_HUMAN	C-C motif chemokine 21	Secreted-factors	-0.58084	-1.87081	2.11177	0.0209348
FCN1	O00602	O00602	FCN1_HUMAN	Ficolin-1	ECM-affiliated	0.0404779	0.129022	0.070352	0.881938
NTN3	O00634	O00634	NET3_HUMAN	Netrin-3	ECM-glycoproteins	-1.32305	-3.91324	6.14038	0
WNT7A	O00755	O00755	WNT7A_HUMAN	Protein Wnt-7a	Secreted-factors	0.224845	0.696908	0.499326	0.39817
ADAM10	O14672	O14672	ADA10_HUMAN	Disintegrin and metalloproteinase domain-containing protein 10	ECM-regulators	-0.0362873	-0.22387	0.250879	0.79725
WNT9A	O14904	O14904	WNT9A_HUMAN	Protein Wnt-9a	Secreted-factors	0.298415	0.898327	0.690746	0.272139
PLXNB2	O15031	O15031	PLXB2_HUMAN	Plexin-B2	ECM-affiliated	-0.139508	-0.929429	2.14105	0.256774
SEMA3E	O15041	O15041	SEM3E_HUMAN	Semaphorin-3E	ECM-affiliated	-0.308937	-1.19548	1.2518	0.144137
ANGPT2	O15123	O15123	ANGP2_HUMAN	Angiopoietin-2	Secreted-factors	0.384324	1.04456	0.804589	0.198503
LAMA5	O15230	O15230	LAMA5_HUMAN	Laminin subunit alpha-5	ECM-glycoproteins	-1.05834	-2.89728	3.72541	0.0004
P4HA2	O15460	O15460	P4HA2_HUMAN	Prolyl 4-hydroxylase subunit alpha-2	ECM-regulators	1.4764	3.80933	5.46196	0
PLXNB1	O43157	O43157	PLXB1_HUMAN	Plexin-B1	ECM-affiliated	-0.398112	-1.03437	0.775723	0.202865
DHH	O43323	O43323	DHH_HUMAN	Desert hedgehog protein	Secreted-factors	-0.358438	-1.18605	1.08859	0.146551
COCH	O43405	O43405	COCH_HUMAN	Cochlin	ECM-glycoproteins	0.12647	0.334093	0.186086	0.69386
TNFSF12	O43508	O43508	TNF12_HUMAN	Tumor necrosis factor ligand superfamily member 12	Secreted-factors	-0.263564	-0.840725	0.653667	0.303976
TGM5	O43548	O43548	TGM5_HUMAN	Protein-glutamine gamma-glutamyltransferase 5	ECM-regulators	0.00853579	0.024985	0.0123597	0.973746
CXCL13	O43927	O43927	CXL13_HUMAN	C-X-C motif chemokine 13	Secreted-factors	0.647134	1.82581	1.86434	0.0239788
PLXNC1	O60486	O60486	PLXC1_HUMAN	Plexin-C1	ECM-affiliated	0.340742	1.47041	1.91281	0.0703111
PLOD3	O60568	O60568	PLOD3_HUMAN	Multifunctional procollagen lysine hydroxylase and glycosyltransferase LH3	ECM-regulators	0.687981	3.23116	7.01843	0.000148148
SRPX2	O60687	O60687	SRPX2_HUMAN	Sushi repeat-containing protein SRPX2	ECM-glycoproteins	0.54272	1.41137	1.21166	0.0815763
PLXNA2	O75051	O75051	PLXA2_HUMAN	Plexin-A2	ECM-affiliated	-0.24204	-0.867311	0.740565	0.290816
SDC3	O75056	O75056	SDC3_HUMAN	Syndecan-3	ECM-affiliated	-0.657349	-2.91212	5.61197	0.000378947
SLIT3	O75094	O75094	SLIT3_HUMAN	Slit homolog 3 protein	ECM-glycoproteins	-0.0875479	-0.291927	0.178462	0.734803
MEGF6	O75095	O75095	MEGF6_HUMAN	Multiple epidermal growth factor-like domains protein 6	Secreted-factors	-0.270669	-0.602071	0.354681	0.465229
ADAMTS4	O75173	O75173	ATS4_HUMAN	A disintegrin and metalloproteinase with thrombospondin motifs 4	ECM-regulators	0.994366	2.01313	1.84293	0.0128521
CILP	O75339	O75339	CILP1_HUMAN	Cartilage intermediate layer protein 1	ECM-glycoproteins	0.710517	1.69547	1.52499	0.0357612
GPC4	O75487	O75487	GPC4_HUMAN	Glypican-4	ECM-affiliated	0.0553981	0.164136	0.0880996	0.854427
SERPINB7	O75635	O75635	SPB7_HUMAN	Serpin B7	ECM-regulators	0.0259918	0.0608798	0.0283032	0.942736
FCN3	O75636	O75636	FCN3_HUMAN	Ficolin-3	ECM-affiliated	0.294669	1.06717	1.00134	0.190021
TNFSF13	O75888	O75888	TNF13_HUMAN	Tumor necrosis factor ligand superfamily member 13	Secreted-factors	-1.20491	-2.843	3.34669	0.000609524
MMP23B	O75900	O75900	MMP23_HUMAN	Matrix metalloproteinase-23	ECM-regulators	-0.491352	-1.03462	0.709598	0.203417
ANXA9	O76027	O76027	ANXA9_HUMAN	Annexin A9	ECM-affiliated	-0.640452	-1.44977	1.18063	0.0738087
FGF18	O76093	O76093	FGF18_HUMAN	Fibroblast growth factor 18	Secreted-factors	-0.15155	-0.619994	0.525173	0.452043
ECM2	O94769	O94769	ECM2_HUMAN	Extracellular matrix protein 2	ECM-glycoproteins	-1.05203	-3.8974	7.18121	0
SLIT2	O94813	O94813	SLIT2_HUMAN	Slit homolog 2 protein	ECM-glycoproteins	-1.22126	-3.63839	5.53872	0
GDF11	O95390	O95390	GDF11_HUMAN	Growth/differentiation factor 11	Secreted-factors	-0.795981	-1.82249	1.66825	0.0240842
PAPLN	O95428	O95428	PPN_HUMAN	Papilin	ECM-glycoproteins	-1.03282	-3.55753	5.93018	0
NTN1	O95631	O95631	NET1_HUMAN	Netrin-1	ECM-glycoproteins	-0.794743	-2.58322	3.49502	0.00151261
ANGPTL1	O95841	O95841	ANGL1_HUMAN	Angiopoietin-related protein 1	Secreted-factors	-0.0610297	-0.240715	0.159606	0.782564
EFEMP2	O95967	O95967	FBLN4_HUMAN	EGF-containing fibulin-like extracellular matrix protein 2	ECM-glycoproteins	0.157144	0.63642	0.538755	0.438164
WNT11	O96014	O96014	WNT11_HUMAN	Protein Wnt-11	Secreted-factors	-0.121401	-0.325358	0.181543	0.702558
F13A1	P00488	P00488	F13A_HUMAN	Coagulation factor XIII A chain	ECM-regulators	1.30599	4.62018	8.784	0
F2	P00734	P00734	THRB_HUMAN	Prothrombin	ECM-regulators	-0.326147	-1.15508	1.10281	0.156959
F9	P00740	P00740	FA9_HUMAN	Coagulation factor IX	ECM-regulators	-0.23797	-0.723027	0.518113	0.382655
F10	P00742	P00742	FA10_HUMAN	Coagulation factor X	ECM-regulators	-0.0219935	-0.0656712	0.0335169	0.941024
PLG	P00747	Cont_P06868;P00747	PLMN_HUMAN	Plasminogen	ECM-regulators	-0.23009	-0.745216	0.560778	0.368941
F12	P00748	P00748	FA12_HUMAN	Coagulation factor XII	ECM-regulators	-0.255587	-0.919121	0.805248	0.262611
PLAU	P00749	P00749	UROK_HUMAN	Urokinase-type plasminogen activator	ECM-regulators	0.431602	1.68082	2.10387	0.0372878
PLAT	P00750	P00750	TPA_HUMAN	Tissue-type plasminogen activator	ECM-regulators	-0.849803	-2.33701	2.68188	0.00426087
SERPINC1	P01008	P01008	ANT3_HUMAN	Antithrombin-III	ECM-regulators	-1.00893	-3.65677	6.43137	0
SERPINA1	P01009	P01009	A1AT_HUMAN	Alpha-1-antitrypsin	ECM-regulators	-0.674603	-2.1332	2.54986	0.00861935
SERPINA3	P01011	P01011	AACT_HUMAN	Alpha-1-antichymotrypsin	ECM-regulators	-0.776615	-2.4632	3.1904	0.00248062
AGT	P01019	P01019	ANGT_HUMAN	Angiotensinogen	ECM-regulators	-0.758048	-2.59652	3.66793	0.00150427
A2M	P01023	P20742;P01023	A2MG_HUMAN	Alpha-2-macroglobulin	ECM-regulators	-0.0478211	-0.135306	0.0700757	0.880135
TIMP1	P01033	P01033	TIMP1_HUMAN	Metalloproteinase inhibitor 1	ECM-regulators	0.81273	2.62412	3.56297	0.00144828
CST3	P01034	P01034	CYTC_HUMAN	Cystatin-C	ECM-regulators	0.0177952	0.0860261	0.061321	0.920079
CST4	P01036	P01036;P01037;P09228	CYTS_HUMAN	Cystatin-S	ECM-regulators	0.728426	2.22426	2.65434	0.0064698
CST1	P01037	P01037	CYTN_HUMAN	Cystatin-SN	ECM-regulators	0.294183	0.958444	0.79453	0.241948
CSTA	P01040	P01040	CYTA_HUMAN	Cystatin-A	ECM-regulators	0.714233	1.8699	1.85285	0.0208432
KNG1	P01042	P01042	KNG1_HUMAN	Kininogen-1	ECM-regulators	-0.530733	-1.83815	2.17359	0.0230588
TGFB1	P01137	P01137	TGFB1_HUMAN	Transforming growth factor beta-1 proprotein	Secreted-factors	1.0138	4.05001	8.10398	0
IGF2	P01344	P01344	IGF2_HUMAN	Insulin-like growth factor II	Secreted-factors	-0.284135	-1.05559	1.00691	0.194329
COL1A1	P02452	P02452	CO1A1_HUMAN	Collagen alpha-1(I) chain	Collagens	-0.462863	-1.62422	1.81871	0.0438679
COL2A1	P02458	P02458	CO2A1_HUMAN	Collagen alpha-1(II) chain	Collagens	0.410697	0.752883	0.443203	0.363245
COL3A1	P02461	P02461	CO3A1_HUMAN	Collagen alpha-1(III) chain	Collagens	-1.44737	-4.31991	7.12635	0
COL4A1	P02462	P02462;P29400	CO4A1_HUMAN	Collagen alpha-1(IV) chain	Collagens	-0.709375	-2.66699	4.13995	0.00122807
FGA	P02671	P02671	FIBA_HUMAN	Fibrinogen alpha chain	ECM-glycoproteins	0.817596	2.20038	2.41384	0.00684211
FGB	P02675	P02675	FIBB_HUMAN	Fibrinogen beta chain	ECM-glycoproteins	0.920842	2.35867	2.61465	0.004
FGG	P02679	P02679	FIBG_HUMAN	Fibrinogen gamma chain	ECM-glycoproteins	0.916501	2.3053	2.50008	0.00476056
C1QA	P02745	P02745	C1QA_HUMAN	Complement C1q subcomponent subunit A	ECM-affiliated	0.238063	0.862195	0.740649	0.293565
C1QB	P02746	P02746	C1QB_HUMAN	Complement C1q subcomponent subunit B	ECM-affiliated	0.245052	0.950403	0.899717	0.245442
C1QC	P02747	P02747	C1QC_HUMAN	Complement C1q subcomponent subunit C	ECM-affiliated	0.295397	0.974387	0.820055	0.233579
LRG1	P02750	P02750	A2GL_HUMAN	Leucine-rich alpha-2-glycoprotein	ECM-glycoproteins	-0.811079	-2.37942	2.86868	0.00367164
FN1	P02751	Cont_P07589;P02751	FINC_HUMAN	Fibronectin	ECM-glycoproteins	1.36806	3.87572	5.89951	0
AMBP	P02760	P02760	AMBP_HUMAN	Protein AMBP	ECM-regulators	-0.888782	-3.23338	5.38019	0.00015
PPBP	P02775	P02775	CXCL7_HUMAN	Platelet basic protein	Secreted-factors	0.995725	2.32048	2.43232	0.0044539
PF4	P02776	P02776	PLF4_HUMAN	Platelet factor 4	Secreted-factors	0.297228	0.849122	0.620882	0.301148
CXCL10	P02778	P02778	CXL10_HUMAN	C-X-C motif chemokine 10	Secreted-factors	0.370703	1.02347	0.788446	0.208512
HPX	P02790	P02790	HEMO_HUMAN	Hemopexin	ECM-affiliated	-0.784335	-2.63205	3.68532	0.00146087
SLPI	P03973	P03973	SLPI_HUMAN	Antileukoproteinase	ECM-regulators	0.311467	0.602864	0.339375	0.465708
VTN	P04004	P04004	VTNC_HUMAN	Vitronectin	ECM-glycoproteins	-0.518921	-1.34114	1.12089	0.0986557
CSTB	P04080	P04080	CYTB_HUMAN	Cystatin-B	ECM-regulators	0.223022	0.991683	1.10032	0.224265
ANXA1	P04083	P04083	ANXA1_HUMAN	Annexin A1	ECM-affiliated	1.1686	4.3284	8.32271	0
HRG	P04196	P04196	HRG_HUMAN	Histidine-rich glycoprotein	ECM-regulators	-0.347561	-1.25706	1.27003	0.122598
S100B	P04271	P04271	S100B_HUMAN	Protein S100-B	Secreted-factors	0.0332187	0.123453	0.0731783	0.886744
VWF	P04275	P04275	VWF_HUMAN	von Willebrand factor	ECM-glycoproteins	0.577505	1.69351	1.70307	0.035802
S100A8	P05109	P05109	S10A8_HUMAN	Protein S100-A8	Secreted-factors	1.25437	2.49856	2.5503	0.002048
SERPINB2	P05120	P05120	PAI2_HUMAN	Plasminogen activator inhibitor 2	ECM-regulators	0.45	1.34315	1.2184	0.0982222
SERPINE1	P05121	P05121	PAI1_HUMAN	Plasminogen activator inhibitor 1	ECM-regulators	0.603809	1.71052	1.6928	0.03392
SERPINA5	P05154	P05154	IPSP_HUMAN	Plasma serine protease inhibitor	ECM-regulators	-0.703378	-2.89698	5.1339	0.00039604
SERPING1	P05155	P05155	IC1_HUMAN	Plasma protease C1 inhibitor	ECM-regulators	-0.224009	-0.763019	0.598695	0.356558
F13B	P05160	P05160	F13B_HUMAN	Coagulation factor XIII B chain	ECM-regulators	-0.0128842	-0.0431797	0.0229897	0.95845
CLEC3B	P05452	Cont_Q2KIS7;P05452	TETN_HUMAN	Tetranectin	ECM-affiliated	-0.290659	-0.995557	0.86836	0.223613
SERPINA7	P05543	P05543	THBG_HUMAN	Thyroxine-binding globulin	ECM-regulators	-0.825131	-2.93521	4.56318	0.000351648
SERPIND1	P05546	P05546	HEP2_HUMAN	Heparin cofactor 2	ECM-regulators	-0.484745	-1.79679	2.22477	0.0258763
COL5A2	P05997	P05997	CO5A2_HUMAN	Collagen alpha-2(V) chain	Collagens	-0.963461	-3.37365	5.55336	5.26316e-05
S100A9	P06702	P06702	S10A9_HUMAN	Protein S100-A9	Secreted-factors	1.11362	2.33346	2.34193	0.00425899
S100A6	P06703	P06703	S10A6_HUMAN	Protein S100-A6	Secreted-factors	-0.241849	-1.25314	1.92868	0.123765
SERPINE2	P07093	P07093	GDN_HUMAN	Glia-derived nexin	ECM-regulators	0.202558	0.570672	0.366393	0.492736
CTSD	P07339	P07339	CATD_HUMAN	Cathepsin D	ECM-regulators	0.273608	1.10291	1.15649	0.175085
ANXA2	P07355	P07355;A6NMY6	ANXA2_HUMAN	Annexin A2	ECM-affiliated	0.299049	1.21261	1.33776	0.138062
DCN	P07585	P07585	PGS2_HUMAN	Decorin	Proteoglycans	-2.13801	-5.46817	9.11667	0
CTSB	P07858	P07858	CATB_HUMAN	Cathepsin B	ECM-regulators	0.992968	3.8572	7.37441	0
LAMB1	P07942	P07942	LAMB1_HUMAN	Laminin subunit beta-1	ECM-glycoproteins	0.621715	2.26486	3.12972	0.00550685
THBS1	P07996	Cont_Q28178;P07996	TSP1_HUMAN	Thrombospondin-1	ECM-glycoproteins	1.36846	4.28616	7.26407	0
COL1A2	P08123	Cont_P02465;P08123	CO1A2_HUMAN	Collagen alpha-2(I) chain	Collagens	-1.26154	-3.93759	6.41296	0
ANXA6	P08133	P08133	ANXA6_HUMAN	Annexin A6	ECM-affiliated	0.15311	0.703071	0.701736	0.397069
SERPINA6	P08185	P08185	CBG_HUMAN	Corticosteroid-binding globulin	ECM-regulators	-0.864081	-2.96463	4.49824	0.000355556
ELANE	P08246	P08246	ELNE_HUMAN	Neutrophil elastase	ECM-regulators	0.912073	1.41748	1.00583	0.0811502
MMP2	P08253	P08253	MMP2_HUMAN	72 kDa type IV collagenase	ECM-regulators	-0.262085	-0.93782	0.825133	0.252142
CTSG	P08311	P08311	CATG_HUMAN	Cathepsin G	ECM-regulators	-0.00988911	-0.0177193	0.00751219	0.980026
MGP	P08493	P08493	MGP_HUMAN	Matrix Gla protein	ECM-glycoproteins	0.384698	0.916226	0.630795	0.263782
LPA	P08519	P08519	APOA_HUMAN	Apolipoprotein(a)	ECM-regulators	1.44613	2.67823	2.76381	0.00123894
COL4A2	P08572	P08572	CO4A2_HUMAN	Collagen alpha-2(IV) chain	Collagens	-0.653297	-2.24926	2.95198	0.00594595
FGF4	P08620	P08620	FGF4_HUMAN	Fibroblast growth factor 4	Secreted-factors	-0.145423	-0.53558	0.39792	0.517901
SERPINF2	P08697	P08697	A2AP_HUMAN	Alpha-2-antiplasmin	ECM-regulators	-0.362447	-1.17422	1.05696	0.150936
F7	P08709	P08709	FA7_HUMAN	Coagulation factor VII	ECM-regulators	-0.156546	-0.51073	0.345346	0.54028
ANXA5	P08758	P08758	ANXA5_HUMAN	Annexin A5	ECM-affiliated	-0.332438	-1.76778	3.42239	0.0280606
FGF2	P09038	P09038	FGF2_HUMAN	Fibroblast growth factor 2	Secreted-factors	-1.53348	-4.51713	7.5343	0
MMP7	P09237	P09237	MMP7_HUMAN	Matrilysin	ECM-regulators	0.762645	1.39458	1.03043	0.0858228
MMP10	P09238	P08254;P09238	MMP10_HUMAN	Stromelysin-2	ECM-regulators	-0.0607171	-0.179442	0.0969974	0.84162
LGALS1	P09382	P09382	LEG1_HUMAN	Galectin-1	ECM-affiliated	-0.178716	-0.734131	0.66195	0.376468
SPARC	P09486	P09486	SPRC_HUMAN	SPARC	ECM-glycoproteins	0.903439	2.43158	2.81597	0.0029697
ANXA4	P09525	P09525	ANXA4_HUMAN	Annexin A4	ECM-affiliated	-0.178415	-0.817468	0.863949	0.318792
INHBB	P09529	P09529	INHBB_HUMAN	Inhibin beta B chain	Secreted-factors	-0.0603511	-0.177479	0.0956186	0.841982
WNT2	P09544	P09544	WNT2_HUMAN	Protein Wnt-2	Secreted-factors	0.0827448	0.27676	0.168096	0.751611
CSF1	P09603	P09603	CSF1_HUMAN	Macrophage colony-stimulating factor 1	Secreted-factors	0.27064	0.973649	0.873689	0.23318
CTSH	P09668	P09668	CATH_HUMAN	Pro-cathepsin H	ECM-regulators	0.634437	2.2731	3.102	0.00524138
FREM3	P0C091	P0C091	FREM3_HUMAN	FRAS1-related extracellular matrix protein 3	ECM-affiliated	0.247053	0.380002	0.183725	0.655704
SRGN	P10124	P10124	SRGN_HUMAN	Serglycin	Proteoglycans	1.85665	4.24041	6.0412	0
SPP1	P10451	P10451	OSTP_HUMAN	Osteopontin	ECM-glycoproteins	0.216741	0.689552	0.500206	0.403119
TGFB3	P10600	P10600	TGFB3_HUMAN	Transforming growth factor beta-3 proprotein	Secreted-factors	0.281583	1.22002	1.44965	0.135398
CTSA	P10619	P10619	PPGB_HUMAN	Lysosomal protective protein	ECM-regulators	0.914029	4.16808	9.64576	0
HAPLN1	P10915	P10915	HPLN1_HUMAN	Hyaluronan and proteoglycan link protein 1	Proteoglycans	0.474039	0.848104	0.514366	0.300862
LAMC1	P11047	P11047	LAMC1_HUMAN	Laminin subunit gamma-1	ECM-glycoproteins	-0.74678	-2.32073	2.86847	0.00448571
MBL2	P11226	P11226	MBL2_HUMAN	Mannose-binding protein C	ECM-affiliated	0.445262	1.11402	0.845382	0.169922
COL11A1	P12107	P12107	COBA1_HUMAN	Collagen alpha-1(XI) chain	Collagens	-1.98808	-5.42026	9.2926	0
COL6A1	P12109	P12109	CO6A1_HUMAN	Collagen alpha-1(VI) chain	Collagens	-1.38054	-4.66554	8.61207	0
COL6A2	P12110	P12110	CO6A2_HUMAN	Collagen alpha-2(VI) chain	Collagens	-1.33937	-4.49294	8.13186	0
COL6A3	P12111	P12111	CO6A3_HUMAN	Collagen alpha-3(VI) chain	Collagens	-1.29135	-4.46063	8.22174	0
ANXA3	P12429	P12429	ANXA3_HUMAN	Annexin A3	ECM-affiliated	0.822746	2.46505	3.07139	0.0025
VCAN	P13611	P13611	CSPG2_HUMAN	Versican core protein	Proteoglycans	2.39496	5.04902	7.52505	0
P4HA1	P13674	P13674	P4HA1_HUMAN	Prolyl 4-hydroxylase subunit alpha-1	ECM-regulators	0.577436	2.25388	3.31332	0.00585034
PRG2	P13727	P13727	PRG2_HUMAN	Bone marrow proteoglycan	Proteoglycans	0.373314	0.684844	0.392461	0.403899
NID1	P14543	P14543	NID1_HUMAN	Nidogen-1	ECM-glycoproteins	-0.999003	-2.90678	3.88456	0.000412371
MMP9	P14780	P14780	MMP9_HUMAN	Matrix metalloproteinase-9	ECM-regulators	0.446447	0.846533	0.522099	0.300281
ELN	P15502	P15502	ELN_HUMAN	Elastin	ECM-glycoproteins	0.205788	0.370122	0.184778	0.662171
MUC1	P15941	P15941	MUC1_HUMAN	Mucin-1	ECM-affiliated	0.642134	1.46678	1.2057	0.0712389
TIMP2	P16035	P16035	TIMP2_HUMAN	Metalloproteinase inhibitor 2	ECM-regulators	0.0237037	0.093388	0.0564732	0.917124
ACAN	P16112	P16112	PGCA_HUMAN	Aggrecan core protein	Proteoglycans	-0.15791	-0.483816	0.311351	0.564535
LGALS3	P17931	P17931	LEG3_HUMAN	Galectin-3	ECM-affiliated	-0.473521	-2.3537	4.75278	0.00405882
IGFBP3	P17936	P17936	IBP3_HUMAN	Insulin-like growth factor-binding protein 3	ECM-glycoproteins	-0.081899	-0.253858	0.146123	0.773609
IGFBP2	P18065	Cont_P13384;P18065	IBP2_HUMAN	Insulin-like growth factor-binding protein 2	ECM-glycoproteins	1.06175	2.81804	3.50771	0.00062963
IL1RN	P18510	P18510	IL1RA_HUMAN	Interleukin-1 receptor antagonist protein	Secreted-factors	0.464837	1.26018	1.04988	0.122524
SDC1	P18827	P18827	SDC1_HUMAN	Syndecan-1	ECM-affiliated	1.41348	3.37212	4.37096	5.19481e-05
ITIH2	P19823	P19823	ITIH2_HUMAN	Inter-alpha-trypsin inhibitor heavy chain H2	ECM-regulators	0.192713	0.649514	0.479784	0.430221
ITIH1	P19827	P19827	ITIH1_HUMAN	Inter-alpha-trypsin inhibitor heavy chain H1	ECM-regulators	0.56819	1.8148	2.00364	0.0245864
PI3	P19957	P19957	ELAF_HUMAN	Elafin	ECM-regulators	0.527187	1.19516	0.893965	0.143726
ANXA7	P20073	P20073	ANXA7_HUMAN	Annexin A7	ECM-affiliated	-0.0604165	-0.382748	0.521946	0.653965
PZP	P20742	P20742	PZP_HUMAN	Pregnancy zone protein	ECM-regulators	0.0662516	0.199365	0.109847	0.818917
OGN	P20774	P20774	MIME_HUMAN	Mimecan	Proteoglycans	-3.2031	-6.78445	11.2275	0
COL5A1	P20908	P20908	CO5A1_HUMAN	Collagen alpha-1(V) chain	Collagens	-0.732558	-3.00161	5.38482	0.000363636
MDK	P21741	P21741	MK_HUMAN	Midkine	Secreted-factors	-0.176474	-0.422201	0.235789	0.61629
FGF7	P21781	P21781	FGF7_HUMAN	Fibroblast growth factor 7	Secreted-factors	-0.542469	-1.58782	1.5436	0.0490185
BGN	P21810	P21810	PGS1_HUMAN	Biglycan	Proteoglycans	-0.45848	-1.26947	1.07344	0.120256
MATN1	P21941	P21941	MATN1_HUMAN	Cartilage matrix protein	ECM-glycoproteins	-0.126981	-0.305688	0.161961	0.721298
TGM2	P21980	P21980	TGM2_HUMAN	Protein-glutamine gamma-glutamyltransferase 2	ECM-regulators	-1.88466	-4.72702	7.37822	0
TNXB	P22105	P22105	TENX_HUMAN	Tenascin-X	ECM-glycoproteins	-1.83061	-4.73418	7.50469	0
IGFBP4	P22692	P22692	IBP4_HUMAN	Insulin-like growth factor-binding protein 4	ECM-glycoproteins	-0.426065	-1.12107	0.874194	0.169032
TGM1	P22735	P22735	TGM1_HUMAN	Protein-glutamine gamma-glutamyltransferase K	ECM-regulators	0.311265	0.644007	0.376643	0.434468
CPN2	P22792	P22792	CPN2_HUMAN	Carboxypeptidase N subunit 2	ECM-regulators	-0.263318	-0.987311	0.922107	0.226046
MMP8	P22894	P22894	MMP8_HUMAN	Neutrophil collagenase	ECM-regulators	0.303454	0.589669	0.330513	0.475743
FBLN1	P23142	Cont_A0A3Q1MJB2;P23142	FBLN1_HUMAN	Fibulin-1	ECM-glycoproteins	-0.235313	-0.686394	0.472967	0.404654
S100A1	P23297	P23297	S10A1_HUMAN	Protein S100-A1	Secreted-factors	0.785825	1.68436	1.44075	0.0368431
LAMA2	P24043	P24043	LAMA2_HUMAN	Laminin subunit alpha-2	ECM-glycoproteins	-0.592371	-1.96928	2.33941	0.0148276
MMP11	P24347	P24347	MMP11_HUMAN	Stromelysin-3	ECM-regulators	1.21339	3.5553	5.29564	0
IGFBP6	P24592	P24592	IBP6_HUMAN	Insulin-like growth factor-binding protein 6	ECM-glycoproteins	-0.899742	-2.8384	3.95279	0.000603774
IGFBP5	P24593	P24593	IBP5_HUMAN	Insulin-like growth factor-binding protein 5	ECM-glycoproteins	-0.608781	-1.81151	1.90411	0.02475
TNC	P24821	P24821	TENA_HUMAN	Tenascin	ECM-glycoproteins	1.79498	5.03723	8.53676	0
COL8A2	P25067	P25067	CO8A2_HUMAN	Collagen alpha-2(VIII) chain	Collagens	0.876222	2.55923	3.20102	0.00166667
LAMA1	P25391	P25391	LAMA1_HUMAN	Laminin subunit alpha-1	ECM-glycoproteins	0.916894	2.13826	2.14578	0.00851948
CTSS	P25774	P25774	CATS_HUMAN	Cathepsin S	ECM-regulators	1.09042	4.09405	7.78773	0
S100P	P25815	P25815	S100P_HUMAN	Protein S100-P	Secreted-factors	1.00718	1.91997	1.67732	0.0180899
COL5A3	P25940	P25940	CO5A3_HUMAN	Collagen alpha-3(V) chain	Collagens	-0.133318	-0.321149	0.171458	0.706091
S100A4	P26447	P26447	S10A4_HUMAN	Protein S100-A4	Secreted-factors	0.189115	0.693856	0.55654	0.400204
MST1	P26927	P26927	HGFL_HUMAN	Hepatocyte growth factor-like protein	Secreted-factors	-0.413942	-1.6486	2.0885	0.0408612
ANXA13	P27216	P27216	ANX13_HUMAN	Annexin A13	ECM-affiliated	-0.757994	-1.92428	1.90423	0.0178757
COL8A1	P27658	P27658	CO8A1_HUMAN	Collagen alpha-1(VIII) chain	Collagens	2.0681	3.9528	5.07312	0
LOX	P28300	P28300	LYOX_HUMAN	Protein-lysine 6-oxidase	ECM-regulators	0.714804	2.17332	2.55375	0.00766013
S100A2	P29034	P29034	S10A2_HUMAN	Protein S100-A2	Secreted-factors	1.109	1.9051	1.60118	0.0192
PCSK6	P29122	P29122	PCSK6_HUMAN	Proprotein convertase subtilisin/kexin type 6	ECM-regulators	-0.0261241	-0.0959557	0.0555274	0.915725
COL4A5	P29400	P29400	CO4A5_HUMAN	Collagen alpha-5(IV) chain	Collagens	-2.22091	-3.94184	4.92637	0
SERPINB3	P29508	P29508	SPB3_HUMAN	Serpin B3	ECM-regulators	0.588207	1.16842	0.823265	0.152387
SERPINA4	P29622	P29622	KAIN_HUMAN	Kallistatin	ECM-regulators	-0.5709	-2.21959	3.22335	0.00656
SERPINB1	P30740	P30740	ILEU_HUMAN	Leukocyte elastase inhibitor	ECM-regulators	0.390188	1.82725	2.96041	0.0238936
S100A7	P31151	P31151	S10A7_HUMAN	Protein S100-A7	Secreted-factors	0.967847	2.05215	1.93285	0.011575
SDC4	P31431	P31431	SDC4_HUMAN	Syndecan-4	ECM-affiliated	-0.624706	-1.97328	2.25995	0.0146127
S100A11	P31949	P31949	S10AB_HUMAN	Protein S100-A11	Secreted-factors	1.24427	4.63047	9.16332	0
S100A3	P33764	P33764	S10A3_HUMAN	Protein S100-A3	Secreted-factors	0.517648	1.51705	1.44282	0.0612909
SDC2	P34741	P34741	SDC2_HUMAN	Syndecan-2	ECM-affiliated	0.329337	0.851031	0.592003	0.300706
GPC1	P35052	P35052	GPC1_HUMAN	Glypican-1	ECM-affiliated	0.0517764	0.253429	0.206569	0.770492
BTC	P35070	P35070	BTC_HUMAN	Probetacellulin	Secreted-factors	-0.29257	-1.1829	1.28575	0.147414
SERPINB6	P35237	P35237	SPB6_HUMAN	Serpin B6	ECM-regulators	-0.45932	-2.52794	6.24663	0.00183607
THBS2	P35442	P35442	TSP2_HUMAN	Thrombospondin-2	ECM-glycoproteins	2.01942	4.69186	7.05032	0
THBS4	P35443	Cont_Q3SWW8;P35443	TSP4_HUMAN	Thrombospondin-4	ECM-glycoproteins	0.50547	1.47206	1.37418	0.0702679
FBN1	P35555	P35555	FBN1_HUMAN	Fibrillin-1	ECM-glycoproteins	-0.710249	-1.98656	2.10978	0.0138605
FBN2	P35556	P35556	FBN2_HUMAN	Fibrillin-2	ECM-glycoproteins	1.49372	2.86391	3.10338	0.00054902
TIMP3	P35625	P35625	TIMP3_HUMAN	Metalloproteinase inhibitor 3	ECM-regulators	-0.747952	-1.01582	0.611526	0.212362
IGFALS	P35858	P35858	ALS_HUMAN	Insulin-like growth factor-binding protein complex acid labile subunit	ECM-glycoproteins	-0.331326	-1.14476	1.06769	0.160248
SERPINB5	P36952	P36952	SPB5_HUMAN	Serpin B5	ECM-regulators	0.71615	1.60027	1.35833	0.0473803
SERPINF1	P36955	P36955	PEDF_HUMAN	Pigment epithelium-derived factor	ECM-regulators	-0.258725	-0.898933	0.760373	0.272532
COL15A1	P39059	P39059	COFA1_HUMAN	Collagen alpha-1(XV) chain	Collagens	-1.10227	-2.92499	3.7141	0.000340426
COL18A1	P39060	P39060	COIA1_HUMAN	Collagen alpha-1(XVIII) chain	Collagens	-0.717891	-2.90095	5.04398	0.00040404
MMP12	P39900	P39900	MMP12_HUMAN	Macrophage metalloelastase	ECM-regulators	-0.385594	-1.04833	0.808802	0.197297
WNT5A	P41221	P41221	WNT5A_HUMAN	Protein Wnt-5a	Secreted-factors	-0.061126	-0.258075	0.182574	0.77034
CXCL12	P48061	P48061	SDF1_HUMAN	Stromal cell-derived factor 1	Secreted-factors	-0.0722701	-0.14674	0.0682592	0.869896
SERPINB4	P48594	P48594	SPB4_HUMAN	Serpin B4	ECM-regulators	0.55053	1.23188	0.928298	0.13062
SERPINB10	P48595	P48595	SPB10_HUMAN	Serpin B10	ECM-regulators	0.241913	0.65038	0.423205	0.430515
MASP1	P48740	P48740	MASP1_HUMAN	Mannan-binding lectin serine protease 1	ECM-regulators	-0.427314	-1.46204	1.52046	0.0717368
LMAN1	P49257	P49257	LMAN1_HUMAN	Protein ERGIC-53	ECM-affiliated	0.50158	2.43248	4.81894	0.0029313
THBS3	P49746	P49746	TSP3_HUMAN	Thrombospondin-3	ECM-glycoproteins	0.662411	2.53979	3.9129	0.00168595
COMP	P49747	P49747	COMP_HUMAN	Cartilage oligomeric matrix protein	ECM-glycoproteins	1.41021	2.83123	3.10227	0.000635514
VEGFB	P49765	P49765	VEGFB_HUMAN	Vascular endothelial growth factor B	Secreted-factors	-0.940189	-2.44142	2.77782	0.00283077
MMP14	P50281	P50281	MMP14_HUMAN	Matrix metalloproteinase-14	ECM-regulators	0.888364	2.85076	4.028	0.000538462
SERPINB8	P50452	P50452	SPB8_HUMAN	Serpin B8	ECM-regulators	1.01052	3.86665	7.30116	0
SERPINB9	P50453	P50453	SPB9_HUMAN	Serpin B9	ECM-regulators	-0.33605	-1.57041	2.33712	0.0516147
SERPINH1	P50454	P50454	SERPH_HUMAN	Serpin H1	ECM-regulators	1.19345	3.67936	5.7574	0
TNFSF10	P50591	P50591	TNF10_HUMAN	Tumor necrosis factor ligand superfamily member 10	Secreted-factors	-0.0955234	-0.266644	0.147029	0.762165
ANXA11	P50995	P50995	ANX11_HUMAN	Annexin A11	ECM-affiliated	0.18733	1.08839	1.9252	0.181077
MMP15	P51511	P51511	MMP15_HUMAN	Matrix metalloproteinase-15	ECM-regulators	0.185235	0.541434	0.349363	0.514404
HCFC1	P51610	P51610	HCFC1_HUMAN	Host cell factor 1	Secreted-factors	-0.295055	-1.86638	5.37541	0.0209677
PLXNA3	P51805	P51805	PLXA3_HUMAN	Plexin-A3	ECM-affiliated	-0.182097	-0.729455	0.641013	0.379359
LUM	P51884	Cont_Q05443;P51884	LUM_HUMAN	Lumican	Proteoglycans	-1.78235	-5.09651	8.76379	0
PRELP	P51888	P51888	PRELP_HUMAN	Prolargin	Proteoglycans	-1.10082	-2.58598	2.88544	0.00152542
CTSC	P53634	P53634	CATC_HUMAN	Dipeptidyl peptidase 1	ECM-regulators	0.952953	4.32802	10.0943	0
MFAP2	P55001	P55001	MFAP2_HUMAN	Microfibrillar-associated protein 2	ECM-glycoproteins	-0.294857	-0.901337	0.700345	0.271759
MFAP1	P55081	P55081	MFAP1_HUMAN	Microfibrillar-associated protein 1	ECM-glycoproteins	-0.169273	-0.954559	1.48624	0.243661
MFAP4	P55083	P55083	MFAP4_HUMAN	Microfibril-associated glycoprotein 4	ECM-glycoproteins	-1.38261	-2.69567	2.84409	0.00123636
INHBC	P55103	P55103	INHBC_HUMAN	Inhibin beta C chain	Secreted-factors	-0.510099	-1.31644	1.09017	0.106098
LAMB2	P55268	P55268	LAMB2_HUMAN	Laminin subunit beta-2	ECM-glycoproteins	-1.50736	-3.69767	5.09302	0
CCL18	P55774	P55774	CCL18_HUMAN	C-C motif chemokine 18	Secreted-factors	0.115835	0.465402	0.356801	0.577299
WNT4	P56705	P56705	WNT4_HUMAN	Protein Wnt-4	Secreted-factors	-1.55734	-4.52892	7.50549	0
PRSS12	P56730	P56730	NETR_HUMAN	Neurotrypsin	ECM-regulators	-0.267992	-0.739405	0.506645	0.373032
INHBE	P58166	P58166	INHBE_HUMAN	Inhibin beta E chain	Secreted-factors	-0.342429	-1.19098	1.13679	0.145061
LOXL3	P58215	P58215	LOXL3_HUMAN	Lysyl oxidase homolog 3	ECM-regulators	-0.00104422	-0.00283138	0.0013424	0.996574
S100A10	P60903	P60903	S10AA_HUMAN	Protein S100-A10	Secreted-factors	0.306669	0.847965	0.609116	0.300037
TGFB2	P61812	P61812	TGFB2_HUMAN	Transforming growth factor beta-2 proprotein	Secreted-factors	0.785815	2.51309	3.31029	0.00195122
RELN	P78509	P78509	RELN_HUMAN	Reelin	ECM-glycoproteins	-0.575479	-2.03183	2.57641	0.0122945
ADAM17	P78536	P78536	ADA17_HUMAN	Disintegrin and metalloproteinase domain-containing protein 17	ECM-regulators	0.316083	2.01657	6.16253	0.0126905
SRPX	P78539	P78539	SRPX_HUMAN	Sushi repeat-containing protein SRPX	ECM-glycoproteins	-1.62796	-3.16422	3.6371	0.000144578
S100A12	P80511	P80511	S10AC_HUMAN	Protein S100-A12	Secreted-factors	0.211238	0.493336	0.282052	0.557437
ADAMTSL3	P82987	P82987	ATL3_HUMAN	ADAMTS-like protein 3	ECM-regulators	-0.449771	-1.25753	1.06461	0.122988
HTRA3	P83110	P83110	HTRA3_HUMAN	Serine protease HTRA3	ECM-regulators	0.89758	1.63846	1.30354	0.0420095
MUC5AC	P98088	P98088	MUC5A_HUMAN	Mucin-5AC	ECM-affiliated	-0.196994	-0.582708	0.385779	0.481433
FBLN2	P98095	P98095	FBLN2_HUMAN	Fibulin-2	ECM-glycoproteins	1.2407	2.92659	3.49899	0.000344086
HSPG2	P98160	P98160	PGBM_HUMAN	Basement membrane-specific heparan sulfate proteoglycan core protein	Proteoglycans	-0.437781	-1.59669	1.83098	0.0479252
COL7A1	Q02388	Q02388	CO7A1_HUMAN	Collagen alpha-1(VII) chain	Collagens	-0.576067	-1.27148	0.96584	0.12
PLOD1	Q02809	Q02809	PLOD1_HUMAN	Procollagen-lysine,2-oxoglutarate 5-dioxygenase 1	ECM-regulators	0.951598	3.36926	5.59249	5.12821e-05
COL10A1	Q03692	Q03692	COAA1_HUMAN	Collagen alpha-1(X) chain	Collagens	2.37726	4.81164	6.91943	0
HGFAC	Q04756	Q04756	HGFA_HUMAN	Hepatocyte growth factor activator	Secreted-factors	-0.301233	-1.19699	1.28621	0.144077
CLC	Q05315	Q05315	LEG10_HUMAN	Galectin-10	ECM-affiliated	0.848336	1.7688	1.53312	0.0281624
COL14A1	Q05707	Q05707	COEA1_HUMAN	Collagen alpha-1(XIV) chain	Collagens	-0.878686	-2.07263	2.05671	0.0110064
ITIH3	Q06033	Q06033	ITIH3_HUMAN	Inter-alpha-trypsin inhibitor heavy chain H3	ECM-regulators	0.530765	1.65702	1.71702	0.0398846
FMOD	Q06828	Cont_P13605;Q06828	FMOD_HUMAN	Fibromodulin	Proteoglycans	-0.0758011	-0.218206	0.118965	0.802393
COL16A1	Q07092	Q07092	COGA1_HUMAN	Collagen alpha-1(XVI) chain	Collagens	0.279378	0.613159	0.361195	0.457171
TCHH	Q07283	Q07283	TRHY_HUMAN	Trichohyalin	Secreted-factors	0.738076	1.42077	1.0769	0.0805862
DPT	Q07507	Q07507	DERM_HUMAN	Dermatopontin	ECM-glycoproteins	-2.32749	-5.88964	10.0199	0
TGM3	Q08188	Q08188	TGM3_HUMAN	Protein-glutamine gamma-glutamyltransferase E	ECM-regulators	-0.0133281	-0.0291743	0.0130786	0.970983
LOXL1	Q08397	Q08397	LOXL1_HUMAN	Lysyl oxidase homolog 1	ECM-regulators	1.54856	3.72858	5.11095	0
MFGE8	Q08431	Q08431	MFGM_HUMAN	Lactadherin	ECM-glycoproteins	-0.172947	-0.479615	0.292825	0.567415
EFEMP1	Q12805	Q12805	FBLN3_HUMAN	EGF-containing fibulin-like extracellular matrix protein 1	ECM-glycoproteins	0.163867	0.447934	0.267593	0.59201
FSTL1	Q12841	Q12841	FSTL1_HUMAN	Follistatin-related protein 1	Secreted-factors	0.103351	0.475071	0.416905	0.570864
OVGP1	Q12889	Q12889	OVGP1_HUMAN	Oviduct-specific glycoprotein	ECM-affiliated	-4.11385	-6.86291	10.6097	0
MMRN1	Q13201	Q13201	MMRN1_HUMAN	Multimerin-1	ECM-glycoproteins	-0.507314	-1.50832	1.44337	0.0625946
SEMA3B	Q13214	Q13214	SEM3B_HUMAN	Semaphorin-3B	ECM-affiliated	-0.947486	-2.06503	1.97397	0.0111392
PAPPA	Q13219	Q13219	PAPP1_HUMAN	Pappalysin-1	ECM-regulators	-1.68399	-4.61577	7.45991	0
SEMA3F	Q13275	Q13275	SEM3F_HUMAN	Semaphorin-3F	ECM-affiliated	0.188858	0.623866	0.449283	0.44946
MFAP5	Q13361	Q13361	MFAP5_HUMAN	Microfibrillar-associated protein 5	ECM-glycoproteins	-0.909142	-2.68658	3.47573	0.00125
ADAM9	Q13443	Q13443	ADAM9_HUMAN	Disintegrin and metalloproteinase domain-containing protein 9	ECM-regulators	0.578251	1.88815	2.16353	0.0199126
ADAM15	Q13444	Q13444	ADA15_HUMAN	Disintegrin and metalloproteinase domain-containing protein 15	ECM-regulators	-0.662056	-2.20248	2.78131	0.00686093
LAMB3	Q13751	Q13751	LAMB3_HUMAN	Laminin subunit beta-3	ECM-glycoproteins	-0.296027	-0.698025	0.437931	0.398256
LAMC2	Q13753	Q13753	LAMC2_HUMAN	Laminin subunit gamma-2	ECM-glycoproteins	-0.563269	-1.3002	1.01628	0.111142
IL16	Q14005	Q14005	IL16_HUMAN	Pro-interleukin-16	Secreted-factors	1.05578	4.08219	7.95552	0
COL4A6	Q14031	Q14031	CO4A6_HUMAN	Collagen alpha-6(IV) chain	Collagens	-2.41061	-4.87826	7.057	0
COL9A2	Q14055	Q14055	CO9A2_HUMAN	Collagen alpha-2(IX) chain	Collagens	-0.122753	-0.44788	0.315578	0.590613
NID2	Q14112	Q14112	NID2_HUMAN	Nidogen-2	ECM-glycoproteins	-0.234643	-0.806907	0.650284	0.322842
IL18	Q14116	Q14116	IL18_HUMAN	Interleukin-18	Secreted-factors	1.60641	4.75069	8.1062	0
EBI3	Q14213	Q14213	IL27B_HUMAN	Interleukin-27 subunit beta	Secreted-factors	-0.242816	-0.725978	0.51615	0.381174
FGL2	Q14314	Q14314	FGL2_HUMAN	Fibroleukin	ECM-glycoproteins	0.281407	0.90426	0.725989	0.27079
GAS6	Q14393	Q14393	GAS6_HUMAN	Growth arrest-specific protein 6	ECM-glycoproteins	-0.22166	-0.832109	0.725846	0.309447
SPARCL1	Q14515	Q14515	SPRL1_HUMAN	SPARC-like protein 1	ECM-glycoproteins	-0.420226	-1.73797	2.35617	0.030794
HABP2	Q14520	Q14520	HABP2_HUMAN	Hyaluronan-binding protein 2	ECM-regulators	0.20142	1.06345	1.55194	0.191366
SEMA3A	Q14563	Q14563	SEM3A_HUMAN	Semaphorin-3A	ECM-affiliated	0.131206	0.357882	0.204469	0.674693
ITIH4	Q14624	Q14624	ITIH4_HUMAN	Inter-alpha-trypsin inhibitor heavy chain H4	ECM-regulators	-0.204419	-0.708719	0.549002	0.393037
LTBP1	Q14766	Q14766	LTBP1_HUMAN	Latent-transforming growth factor beta-binding protein 1	ECM-glycoproteins	-0.421418	-1.48214	1.5865	0.0680538
LTBP2	Q14767	Q14767	LTBP2_HUMAN	Latent-transforming growth factor beta-binding protein 2	ECM-glycoproteins	1.12446	3.12043	4.20698	0.000282353
POSTN	Q15063	Q15063	POSTN_HUMAN	Periostin	ECM-glycoproteins	-2.37688	-5.1047	7.69692	0
PCOLCE	Q15113	Q15113	PCOC1_HUMAN	Procollagen C-endopeptidase enhancer 1	ECM-glycoproteins	-0.111326	-0.340359	0.203555	0.688232
FCN2	Q15485	Q15485	FCN2_HUMAN	Ficolin-2	ECM-affiliated	0.328361	1.11512	1.01469	0.17052
TGFBI	Q15582	Q15582	BGH3_HUMAN	Transforming growth factor-beta-induced protein ig-h3	ECM-glycoproteins	-0.0586447	-0.231538	0.152784	0.789986
CST6	Q15828	Q15828	CYTM_HUMAN	Cystatin-M	ECM-regulators	0.154526	0.355256	0.189566	0.676097
ADIPOQ	Q15848	Q15848	ADIPO_HUMAN	Adiponectin	ECM-glycoproteins	-0.836904	-2.39783	2.86008	0.00336842
IGFBP7	Q16270	Q16270	IBP7_HUMAN	Insulin-like growth factor-binding protein 7	ECM-glycoproteins	0.712087	3.21697	6.6481	0.000146341
LAMA4	Q16363	Q16363	LAMA4_HUMAN	Laminin subunit alpha-4	ECM-glycoproteins	-0.460518	-1.32093	1.1606	0.1048
ECM1	Q16610	Q16610	ECM1_HUMAN	Extracellular matrix protein 1	ECM-glycoproteins	-0.119232	-0.464227	0.346588	0.577114
CTF1	Q16619	Q16619	CTF1_HUMAN	Cardiotrophin-1	Secreted-factors	-0.634285	-2.28978	3.15778	0.00497222
LAMA3	Q16787	Q16787	LAMA3_HUMAN	Laminin subunit alpha-3	ECM-glycoproteins	-0.945078	-2.92843	4.09482	0.000347826
C17orf58	Q2M2W7	Q2M2W7	CQ058_HUMAN	UPF0450 protein C17orf58	ECM-regulators	-0.499251	-1.17055	0.880453	0.152104
COL28A1	Q2UY09	Q2UY09	COSA1_HUMAN	Collagen alpha-1(XXVIII) chain	Collagens	-0.648757	-1.14089	0.765588	0.161484
FNDC1	Q4ZHG4	Q4ZHG4	FNDC1_HUMAN	Fibronectin type III domain-containing protein 1	ECM-glycoproteins	0.163442	0.451587	0.271584	0.589354
VWA3B	Q502W6	Q502W6	VWA3B_HUMAN	von Willebrand factor A domain-containing protein 3B	ECM-glycoproteins	0.524012	1.13636	0.817703	0.163072
FBLN7	Q53RD9	Q53RD9	FBLN7_HUMAN	Fibulin-7	ECM-glycoproteins	-2.44739	-5.70025	9.25741	0
VWA2	Q5GFL6	Q5GFL6	VWA2_HUMAN	von Willebrand factor A domain-containing protein 2	ECM-glycoproteins	-0.605295	-1.41423	1.15436	0.0815556
FREM1	Q5H8C1	Q5H8C1	FREM1_HUMAN	FRAS1-related extracellular matrix protein 1	ECM-affiliated	-0.629985	-2.0545	2.46107	0.0115472
COLEC12	Q5KU26	Q5KU26	COL12_HUMAN	Collectin-12	ECM-affiliated	0.418068	1.28465	1.16272	0.115952
FREM2	Q5SZK8	Q5SZK8	FREM2_HUMAN	FRAS1-related extracellular matrix protein 2	ECM-affiliated	-2.01257	-4.26848	5.91521	0
ANXA8L1	Q5VT79	Q5VT79;P13928	AXA81_HUMAN	Annexin A8-like protein 1	ECM-affiliated	0.400899	1.06926	0.823371	0.1903
LGALS9C	Q6DKI2	Q3B8N2;Q6DKI2	LEG9C_HUMAN	Galectin-9C	ECM-affiliated	1.52395	4.37443	7.08965	0
SFRP4	Q6FHJ7	Q6FHJ7	SFRP4_HUMAN	Secreted frizzled-related protein 4	Secreted-factors	-1.44198	-3.93505	5.90625	0
OGFOD2	Q6N063	Q6N063	OGFD2_HUMAN	2-oxoglutarate and iron-dependent oxygenase domain-containing protein 2	ECM-regulators	0.11982	0.539499	0.480847	0.515016
VWA1	Q6PCB0	Q6PCB0	VWA1_HUMAN	von Willebrand factor A domain-containing protein 1	ECM-glycoproteins	-0.259959	-1.058	1.09889	0.193595
CSPG4	Q6UVK1	Q6UVK1	CSPG4_HUMAN	Chondroitin sulfate proteoglycan 4	ECM-affiliated	0.405278	1.24024	1.10161	0.127626
PLXDC2	Q6UX71	Q6UX71	PXDC2_HUMAN	Plexin domain-containing protein 2	ECM-affiliated	-0.0754719	-0.375493	0.339223	0.659243
CRELD2	Q6UXH1	Q6UXH1	CREL2_HUMAN	Protein disulfide isomerase CRELD2	ECM-glycoproteins	0.826262	2.6903	3.72506	0.00122523
PAMR1	Q6UXH9	Q6UXH9	PAMR1_HUMAN	Inactive serine protease PAMR1	ECM-regulators	-0.414763	-1.13296	0.904838	0.163583
NPNT	Q6UXI9	Q6UXI9	NPNT_HUMAN	Nephronectin	ECM-glycoproteins	-0.464444	-1.24568	1.02656	0.125984
ADAMTSL4	Q6UY14	Q6UY14	ATL4_HUMAN	ADAMTS-like protein 4	ECM-regulators	-1.14854	-4.64794	9.89002	0
CD109	Q6YHK3	Q6YHK3	CD109_HUMAN	CD109 antigen	ECM-regulators	-0.121236	-0.512021	0.421264	0.540249
ADAMTSL5	Q6ZMM2	Q6ZMM2	ATL5_HUMAN	ADAMTS-like protein 5	ECM-regulators	-2.24372	-5.81564	9.9621	0
THSD4	Q6ZMP0	Q6ZMP0	THSD4_HUMAN	Thrombospondin type-1 domain-containing protein 4	ECM-glycoproteins	0.527351	1.35556	1.13538	0.0948595
KCP	Q6ZWJ8	Q6ZWJ8	KCP_HUMAN	Kielin/chordin-like protein	ECM-glycoproteins	-0.565481	-1.66195	1.65763	0.0392657
FBN3	Q75N90	Q75N90	FBN3_HUMAN	Fibrillin-3	ECM-glycoproteins	0.377364	0.72274	0.42592	0.381769
PODN	Q7Z5L7	Q7Z5L7	PODN_HUMAN	Podocan	Proteoglycans	-1.3928	-3.96945	6.13207	0
BMP8A	Q7Z5Y6	Q7Z5Y6	BMP8A_HUMAN	Bone morphogenetic protein 8A	Secreted-factors	-0.0123671	-0.0440585	0.0242604	0.959419
ABI3BP	Q7Z7G0	Q7Z7G0	TARSH_HUMAN	Target of Nesh-SH3	ECM-glycoproteins	-1.3122	-3.45237	4.76055	5.33333e-05
MEGF8	Q7Z7M0	Q7Z7M0	MEGF8_HUMAN	Multiple epidermal growth factor-like domains protein 8	Secreted-factors	-0.173493	-0.661838	0.539046	0.422715
S100A7A	Q86SG5	Q86SG5	S1A7A_HUMAN	Protein S100-A7A	Secreted-factors	0.770832	1.88823	1.81709	0.020022
CLEC14A	Q86T13	Q86T13	CLC14_HUMAN	C-type lectin domain family 14 member A	ECM-affiliated	-0.089113	-0.236352	0.125599	0.785981
ITIH5	Q86UX2	Q86UX2	ITIH5_HUMAN	Inter-alpha-trypsin inhibitor heavy chain H5	ECM-regulators	-0.56545	-2.02135	2.58304	0.0125301
SERPINA9	Q86WD7	Q86WD7	SPA9_HUMAN	Serpin A9	ECM-regulators	-0.321244	-1.26807	1.3921	0.120287
FRAS1	Q86XX4	Q86XX4	FRAS1_HUMAN	Extracellular matrix organizing protein FRAS1	ECM-glycoproteins	-1.48109	-4.09016	6.29286	0
CRLF3	Q8IUI8	Q8IUI8	CRLF3_HUMAN	Cytokine receptor-like factor 3	Secreted-factors	0.894767	3.64652	7.1215	0
PLXDC1	Q8IUK5	Q8IUK5	PLDX1_HUMAN	Plexin domain-containing protein 1	ECM-affiliated	-0.149002	-0.553541	0.417826	0.507353
CILP2	Q8IUL8	Q8IUL8	CILP2_HUMAN	Cartilage intermediate layer protein 2	ECM-glycoproteins	0.307726	0.993918	0.831264	0.223721
AEBP1	Q8IUX7	Q8IUX7	AEBP1_HUMAN	Adipocyte enhancer-binding protein 1	ECM-glycoproteins	-0.187947	-0.685792	0.545608	0.403978
EGFL6	Q8IUX8	Q8IUX8	EGFL6_HUMAN	Epidermal growth factor-like protein 6	Secreted-factors	-0.227316	-0.700783	0.501394	0.398109
SERPINA12	Q8IW75	Q8IW75	SPA12_HUMAN	Serpin A12	ECM-regulators	0.247685	0.650917	0.419185	0.431233
SULF2	Q8IWU5	Q8IWU5	SULF2_HUMAN	Extracellular sulfatase Sulf-2	ECM-regulators	0.171541	0.515616	0.33351	0.537958
SULF1	Q8IWU6	Q8IWU6	SULF1_HUMAN	Extracellular sulfatase Sulf-1	ECM-regulators	1.55076	3.64302	4.87863	0
LGI2	Q8N0V4	Q8N0V4	LGI2_HUMAN	Leucine-rich repeat LGI family member 2	ECM-glycoproteins	-0.699461	-1.96269	2.07507	0.0151771
LGI4	Q8N135	Q8N135	LGI4_HUMAN	Leucine-rich repeat LGI family member 4	ECM-glycoproteins	-0.348523	-0.811864	0.531277	0.32006
VWDE	Q8N2E2	Q8N2E2	VWDE_HUMAN	von Willebrand factor D and EGF domain-containing protein	ECM-glycoproteins	-0.0208453	-0.0686355	0.0367559	0.93957
LTBP4	Q8N2S1	Q8N2S1	LTBP4_HUMAN	Latent-transforming growth factor beta-binding protein 4	ECM-glycoproteins	0.0138217	0.032932	0.0151737	0.968691
SFRP1	Q8N474	Q8N474	SFRP1_HUMAN	Secreted frizzled-related protein 1	Secreted-factors	-2.37108	-7.13391	13.8354	0
OGFOD1	Q8N543	Q8N543	OGFD1_HUMAN	Prolyl 3-hydroxylase OGFOD1	ECM-regulators	0.218251	1.0071	1.17694	0.217137
ADAMTSL1	Q8N6G6	Q8N6G6	ATL1_HUMAN	ADAMTS-like protein 1	ECM-regulators	-0.919006	-2.48955	2.93109	0.00212698
HMCN2	Q8NDA2	Q8NDA2	HMCN2_HUMAN	Hemicentin-2	ECM-glycoproteins	-0.537626	-1.68887	1.77486	0.0363547
COL22A1	Q8NFW1	Q8NFW1	COMA1_HUMAN	Collagen alpha-1(XXII) chain	Collagens	-1.55575	-4.50561	7.43292	0
ANGPTL6	Q8NI99	Q8NI99	ANGL6_HUMAN	Angiopoietin-related protein 6	Secreted-factors	-1.3072	-2.99379	3.57389	0.000359551
IL17D	Q8TAD2	Q8TAD2	IL17D_HUMAN	Interleukin-17D	Secreted-factors	0.125419	0.310107	0.166291	0.717445
ADAMTS16	Q8TE57	Q8TE57	ATS16_HUMAN	A disintegrin and metalloproteinase with thrombospondin motifs 16	ECM-regulators	0.0770504	0.20159	0.104685	0.818262
SNED1	Q8TER0	Q8TER0	SNED1_HUMAN	Sushi, nidogen and EGF-like domain-containing protein 1	ECM-glycoproteins	-1.0642	-4.11478	8.04451	0
WFIKKN2	Q8TEU8	Q8TEU8	WFKN2_HUMAN	WAP, Kazal, immunoglobulin, Kunitz and NTR domain-containing protein 2	Secreted-factors	0.235107	0.700775	0.491798	0.396971
TSKU	Q8WUA8	Q8WUA8	TSK_HUMAN	Tsukushi	ECM-glycoproteins	-0.826712	-1.89222	1.76557	0.0199337
ITLN1	Q8WWA0	Q8WWA0	ITLN1_HUMAN	Intelectin-1	ECM-affiliated	0.0386973	0.123032	0.0667747	0.885182
HPSE2	Q8WWQ2	Q8WWQ2	HPSE2_HUMAN	Inactive heparanase-2	ECM-regulators	-1.59379	-2.86021	3.02601	0.000543689
OIT3	Q8WWZ8	Q8WWZ8	OIT3_HUMAN	Oncoprotein-induced transcript 3 protein	ECM-glycoproteins	0.12187	0.373397	0.227383	0.659902
MUC16	Q8WXI7	Q8WXI7	MUC16_HUMAN	Mucin-16	ECM-affiliated	-0.269675	-0.489187	0.257715	0.560299
SPOCK2	Q92563	Q92563	TICN2_HUMAN	Testican-2	Proteoglycans	0.357861	1.06841	0.875637	0.190069
PXDN	Q92626	Q92626	PXDN_HUMAN	Peroxidasin homolog	ECM-glycoproteins	1.23503	3.98727	6.68163	0
HTRA1	Q92743	Q92743	HTRA1_HUMAN	Serine protease HTRA1	ECM-regulators	0.656391	1.38964	1.07991	0.0867731
FRZB	Q92765	Q92765	SFRP3_HUMAN	Secreted frizzled-related protein 3	Secreted-factors	0.103772	0.253542	0.131682	0.772188
SEMA4D	Q92854	Q92854	SEM4D_HUMAN	Semaphorin-4D	ECM-affiliated	-0.402528	-1.12096	0.900597	0.1685
PRG4	Q92954	Q92954	PRG4_HUMAN	Proteoglycan 4	Proteoglycans	0.548751	1.66893	1.70537	0.0386408
WNT2B	Q93097	Q93097	WNT2B_HUMAN	Protein Wnt-2b	Secreted-factors	-0.64784	-1.5467	1.33007	0.0560548
EMID1	Q96A84	Q96A84	EMID1_HUMAN	EMI domain-containing protein 1	ECM-glycoproteins	-0.193321	-0.431842	0.236338	0.607689
CTHRC1	Q96CG8	Q96CG8	CTHR1_HUMAN	Collagen triple helix repeat-containing protein 1	ECM-glycoproteins	1.6385	4.40018	6.8914	0
MUCL1	Q96DR8	Q96DR8	MUCL1_HUMAN	Mucin-like protein 1	ECM-affiliated	0.0763803	0.154905	0.072317	0.863728
PIK3IP1	Q96FE7	Q96FE7	P3IP1_HUMAN	Phosphoinositide-3-kinase-interacting protein 1	Secreted-factors	-0.219937	-0.888996	0.85051	0.277429
S100A16	Q96FQ6	Q96FQ6	S10AG_HUMAN	Protein S100-A16	Secreted-factors	0.885055	2.912	4.23815	0.000375
CRELD1	Q96HD1	Q96HD1	CREL1_HUMAN	Protein disulfide isomerase CRELD1	ECM-glycoproteins	0.697293	2.02947	2.23385	0.0122927
SFRP2	Q96HF1	Q96HF1	SFRP2_HUMAN	Secreted frizzled-related protein 2	Secreted-factors	0.522163	1.80296	2.10494	0.0253679
NGLY1	Q96IV0	Q96IV0	NGLY1_HUMAN	Peptide-N(4)-(N-acetyl-beta-glucosaminyl)asparagine amidase	ECM-regulators	-0.0265156	-0.131678	0.0998665	0.882744
LOXL4	Q96JB6	Q96JB6	LOXL4_HUMAN	Lysyl oxidase homolog 4	ECM-regulators	0.416412	1.37142	1.34282	0.0914812
ZFP91	Q96JP5	Q96JP5	ZFP91_HUMAN	E3 ubiquitin-protein ligase ZFP91	Secreted-factors	0.131164	0.473508	0.335667	0.571041
SERPINB11	Q96P15	Q96P15	SPB11_HUMAN	Serpin B11	ECM-regulators	-0.310534	-1.15493	1.14834	0.156441
COL21A1	Q96P44	Q96P44	COLA1_HUMAN	Collagen alpha-1(XXI) chain	Collagens	-3.88513	-6.34595	9.51601	0
SERPINB12	Q96P63	Q96P63	SPB12_HUMAN	Serpin B12	ECM-regulators	0.405239	0.819385	0.51052	0.318242
HMCN1	Q96RW7	Q96RW7	HMCN1_HUMAN	Hemicentin-1	ECM-glycoproteins	0.75408	2.00437	2.07715	0.0131696
HAPLN3	Q96S86	Q96S86	HPLN3_HUMAN	Hyaluronan and proteoglycan link protein 3	Proteoglycans	2.69119	6.00503	9.7596	0
MMP19	Q99542	Q99542	MMP19_HUMAN	Matrix metalloproteinase-19	ECM-regulators	0.537144	1.46283	1.3093	0.071859
SERPINI1	Q99574	Q99574	NEUS_HUMAN	Neuroserpin	ECM-regulators	0.139347	0.542817	0.423002	0.515652
S100A13	Q99584	Q99584	S10AD_HUMAN	Protein S100-A13	Secreted-factors	0.100364	0.408046	0.305883	0.629731
COL12A1	Q99715	Q99715	COCA1_HUMAN	Collagen alpha-1(XII) chain	Collagens	-0.0614265	-0.166811	0.0863582	0.85303
CCL19	Q99731	Q99731	CCL19_HUMAN	C-C motif chemokine 19	Secreted-factors	0.151815	0.38593	0.216962	0.65205
OMD	Q99983	Q99983	OMD_HUMAN	Osteomodulin	Proteoglycans	-1.41505	-3.7573	5.43286	0
SEMA3C	Q99985	Q99985	SEM3C_HUMAN	Semaphorin-3C	ECM-affiliated	0.313838	0.89737	0.669794	0.271987
GDF15	Q99988	Q99988	GDF15_HUMAN	Growth/differentiation factor 15	Secreted-factors	0.0160688	0.0548845	0.0297201	0.947852
CHRDL1	Q9BU40	Q9BU40	CRDL1_HUMAN	Chordin-like protein 1	Secreted-factors	-0.0652888	-0.246416	0.158826	0.777458
SPON2	Q9BUD6	Q9BUD6	SPON2_HUMAN	Spondin-2	ECM-glycoproteins	0.41173	1.43039	1.48922	0.0782857
COLEC11	Q9BWP8	Q9BWP8	COL11_HUMAN	Collectin-11	ECM-affiliated	0.138649	0.417028	0.257105	0.620838
C1QTNF6	Q9BXI9	Q9BXI9	C1QT6_HUMAN	Complement C1q tumor necrosis factor-related protein 6	ECM-affiliated	0.345888	1.09673	0.944169	0.177684
C1QTNF5	Q9BXJ0	Q9BXJ0	C1QT5_HUMAN	Complement C1q tumor necrosis factor-related protein 5	ECM-affiliated	-0.343115	-0.762841	0.480563	0.35568
C1QTNF7	Q9BXJ2	Q9BXJ2	C1QT7_HUMAN	Complement C1q tumor necrosis factor-related protein 7	ECM-affiliated	-0.604965	-2.01725	2.43335	0.0127186
C1QTNF3	Q9BXJ4	Q9BXJ4	C1QT3_HUMAN	Complement C1q tumor necrosis factor-related protein 3	ECM-affiliated	0.32432	0.906919	0.671451	0.269623
ASPN	Q9BXN1	Q9BXN1	ASPN_HUMAN	Asporin	Proteoglycans	-2.26688	-5.34618	8.52648	0
EMILIN2	Q9BXX0	Q9BXX0	EMIL2_HUMAN	EMILIN-2	ECM-glycoproteins	-0.363736	-1.79345	3.09601	0.0260923
ANGPTL4	Q9BY76	Q9BY76	ANGL4_HUMAN	Angiopoietin-related protein 4	Secreted-factors	-0.286195	-0.765107	0.521884	0.355679
SEMA4C	Q9C0C4	Q9C0C4	SEM4C_HUMAN	Semaphorin-4C	ECM-affiliated	-0.862758	-3.02959	4.7363	0.000321839
TINAGL1	Q9GZM7	Q9GZM7	TINAL_HUMAN	Tubulointerstitial nephritis antigen-like	ECM-glycoproteins	-1.29594	-3.70002	5.53271	0
WNT10A	Q9GZT5	Q9GZT5	WN10A_HUMAN	Protein Wnt-10a	Secreted-factors	-0.0382169	-0.0892237	0.0420393	0.918211
EGLN1	Q9GZT9	Q9GZT9	EGLN1_HUMAN	Egl nine homolog 1	ECM-regulators	0.114001	0.638804	0.819244	0.437118
WNT5B	Q9H1J7	Q9H1J7	WNT5B_HUMAN	Protein Wnt-5b	Secreted-factors	-0.446189	-1.6417	1.92494	0.0417714
MEGF9	Q9H1U4	Q9H1U4	MEGF9_HUMAN	Multiple epidermal growth factor-like domains protein 9	Secreted-factors	-2.19566	-4.16956	5.48257	0
MMP28	Q9H239	Q9H239	MMP28_HUMAN	Matrix metalloproteinase-28	ECM-regulators	-1.52303	-3.61253	4.83886	0
CHRD	Q9H2X0	Q9H2X0	CHRD_HUMAN	Chordin	Secreted-factors	-0.786445	-2.00557	2.03316	0.0132235
SEMA4A	Q9H3S1	Q9H3S1	SEM4A_HUMAN	Semaphorin-4A	ECM-affiliated	0.643063	2.04183	2.39061	0.0120247
SMOC2	Q9H3U7	Q9H3U7	SMOC2_HUMAN	SPARC-related modular calcium-binding protein 2	ECM-glycoproteins	-0.859342	-2.90161	4.29921	0.000408163
SMOC1	Q9H4F8	Q9H4F8	SMOC1_HUMAN	SPARC-related modular calcium-binding protein 1	ECM-glycoproteins	-0.785741	-2.76694	4.13571	0.000844037
MMRN2	Q9H8L6	Q9H8L6	MMRN2_HUMAN	Multimerin-2	ECM-glycoproteins	-0.0157656	-0.0612371	0.0359353	0.944279
MUC5B	Q9HC84	Q9HC84	MUC5B_HUMAN	Mucin-5B	ECM-affiliated	0.263366	0.46729	0.242475	0.576835
SPON1	Q9HCB6	Q9HCB6	SPON1_HUMAN	Spondin-1	ECM-glycoproteins	-0.545177	-1.37015	1.1404	0.0916167
PLXNA4	Q9HCM2	O75051;Q9HCM2	PLXA4_HUMAN	Plexin-A4	ECM-affiliated	0.118123	0.296539	0.158888	0.730962
FGF22	Q9HCT0	Q9HCT0	FGF22_HUMAN	Fibroblast growth factor 22	Secreted-factors	-0.233166	-0.887461	0.803325	0.277575
S100A14	Q9HCY8	Q9HCY8	S10AE_HUMAN	Protein S100-A14	Secreted-factors	0.658479	1.41354	1.1131	0.0813957
CD209	Q9NNX6	Q9NNX6	CD209_HUMAN	CD209 antigen	ECM-affiliated	0.53357	1.45499	1.29987	0.0728908
MMP25	Q9NPA2	Q9NPA2	MMP25_HUMAN	Matrix metalloproteinase-25	ECM-regulators	0.102078	0.340412	0.21362	0.68986
SEMA4B	Q9NPR2	Q9NPR2	SEM4B_HUMAN	Semaphorin-4B	ECM-affiliated	-0.932913	-3.06063	4.56191	0.00027907
MXRA5	Q9NR99	Q9NR99	MXRA5_HUMAN	Matrix-remodeling-associated protein 5	ECM-glycoproteins	1.98084	5.25348	8.78445	0
PDGFC	Q9NRA1	Q9NRA1	PDGFC_HUMAN	Platelet-derived growth factor C	Secreted-factors	0.360543	1.15581	1.02563	0.157289
LTBP3	Q9NS15	Q9NS15	LTBP3_HUMAN	Latent-transforming growth factor beta-binding protein 3	ECM-glycoproteins	0.820479	2.29399	2.63173	0.00481119
SEMA3G	Q9NS98	Q9NS98	SEM3G_HUMAN	Semaphorin-3G	ECM-affiliated	-0.494353	-1.58081	1.6261	0.0500829
EMILIN3	Q9NT22	Q9NT22	EMIL3_HUMAN	EMILIN-3	ECM-glycoproteins	-1.1258	-3.33782	4.85217	5.06329e-05
P4HTM	Q9NXG6	Q9NXG6	P4HTM_HUMAN	Transmembrane prolyl 4-hydroxylase	ECM-regulators	0.199599	0.812476	0.75475	0.320565
CTSZ	Q9UBR2	Q9UBR2	CATZ_HUMAN	Cathepsin Z	ECM-regulators	0.928098	4.32751	10.3941	0
CTSF	Q9UBX1	Q9UBX1	CATF_HUMAN	Cathepsin F	ECM-regulators	-0.796857	-2.11796	2.2603	0.00894872
FBLN5	Q9UBX5	Q9UBX5	FBLN5_HUMAN	Fibulin-5	ECM-glycoproteins	0.926871	1.90597	1.70647	0.0192179
DMBT1	Q9UGM3	Q9UGM3	DMBT1_HUMAN	Deleted in malignant brain tumors 1 protein	ECM-glycoproteins	0.321314	0.590084	0.325424	0.476602
EGFL7	Q9UHF1	Q9UHF1	EGFL7_HUMAN	Epidermal growth factor-like protein 7	Secreted-factors	-0.350078	-1.11509	0.969834	0.169972
ADAMTS1	Q9UHI8	Q9UHI8	ATS1_HUMAN	A disintegrin and metalloproteinase with thrombospondin motifs 1	ECM-regulators	0.222266	0.653581	0.445662	0.42985
SERPINB13	Q9UIV8	Q9UIV8	SPB13_HUMAN	Serpin B13	ECM-regulators	0.18585	0.547717	0.355996	0.511788
PLXNA1	Q9UIW2	Q9UIW2	PLXA1_HUMAN	Plexin-A1	ECM-affiliated	-0.137779	-0.814572	1.29234	0.319916
ANXA10	Q9UJ72	Q9UJ72	ANX10_HUMAN	Annexin A10	ECM-affiliated	0.970698	2.02522	1.88195	0.0124364
SERPINA10	Q9UK55	Q9UK55	ZPI_HUMAN	Protein Z-dependent protease inhibitor	ECM-regulators	-0.162166	-0.542544	0.378588	0.514663
ANGPTL2	Q9UKU9	Q8NI99;Q9UKU9	ANGL2_HUMAN	Angiopoietin-related protein 2	Secreted-factors	0.0228139	0.0921339	0.0566469	0.916821
ADAMTS5	Q9UNA0	Q9UNA0	ATS5_HUMAN	A disintegrin and metalloproteinase with thrombospondin motifs 5	ECM-regulators	-0.537547	-1.51198	1.40065	0.0621176
CLEC11A	Q9Y240	Q9Y240	CLC11_HUMAN	C-type lectin domain family 11 member A	ECM-affiliated	-0.392988	-1.15485	0.969115	0.155883
HPSE	Q9Y251	Q9Y251	HPSE_HUMAN	Heparanase	ECM-regulators	0.0529957	0.129464	0.0631985	0.883365
PRG3	Q9Y2Y8	Q9Y2Y8	PRG3_HUMAN	Proteoglycan 3	Proteoglycans	0.146557	0.396532	0.23004	0.640943
PLXND1	Q9Y4D7	Q9Y4D7	PLXD1_HUMAN	Plexin-D1	ECM-affiliated	-0.492734	-1.59258	1.65703	0.0483721
LOXL2	Q9Y4K0	Q9Y4K0	LOXL2_HUMAN	Lysyl oxidase homolog 2	ECM-regulators	0.798623	2.48225	3.18274	0.00229921
ST14	Q9Y5Y6	Q9Y5Y6	ST14_HUMAN	Suppressor of tumorigenicity 14 protein	ECM-regulators	0.66855	1.92812	2.05339	0.0175227
HCFC2	Q9Y5Z7	Q9Y5Z7	HCFC2_HUMAN	Host cell factor 2	Secreted-factors	-0.0542461	-0.154483	0.0810525	0.86229
GPC6	Q9Y625	Q9Y625	GPC6_HUMAN	Glypican-6	ECM-affiliated	0.740622	1.77694	1.64081	0.027449
EMILIN1	Q9Y6C2	Q9Y6C2	EMIL1_HUMAN	EMILIN-1	ECM-glycoproteins	-0.522994	-2.04511	2.857	0.0119255
WNT6	Q9Y6F9	Q9Y6F9	WNT6_HUMAN	Protein Wnt-6	Secreted-factors	-1.63315	-3.15436	3.61126	0.000190476
LAMC3	Q9Y6N6	Q9Y6N6	LAMC3_HUMAN	Laminin subunit gamma-3	ECM-glycoproteins	-0.110713	-0.213101	0.100839	0.806876
