# Supplementary material for: Spatial proteomics of ovarian cancer precursors delineates early disease changes and drug targets
Source: Mol Syst Biol. 2025 Nov 13;22(1):7–41. doi: 10.1038/s44320-025-00168-4 (PMC12759074; doi:10.1038/s44320-025-00168-4)
Supplement: Supplementary file 22 — Dataset EV16 [file 44320_2025_168_MOESM22_ESM.xlsx]

## Sheet: Legend
Dataset EV16. Results of support vector machine (SVM) classification in stromal samples to prioritize proteins significantly upregulated in the invasive stroma.

## Sheet: Dataset EV16
Rank by support vector machine (SVM)	W29AW29B_epistroma	W29AW29B_tumorstroma	W29C_epistroma	W29C_tumorstroma	W29G_epistroma	W29G_tumorstroma	W29H_epistroma	W29H_tumorstroma	W31XW31Y_epistroma	W31XW31Y_tumorstroma	W31YW31X_epistroma	W31YW31X_tumorstroma	W29EW29F_epistroma	W29EW29F_tumorstroma	W29IW29J_epistroma	W29IW29J_tumorstroma	W30A_epistroma	W30A_tumorstroma	W30B_epistroma	W30B_tumorstroma	W30C_epistroma	W30C_tumorstroma	W30E_epistroma	W30E_tumorstroma	W30GW30H_epistroma	W30GW30H_tumorstroma	W30L_epistroma	W30L_tumorstroma	W30M_epistroma	W30M_tumorstroma	W30V_epistroma	W30V_tumorstroma	W30DW30F_tumorstroma	W30JW30K_epistroma	W30JW30K_tumorstroma	W30KW30J_epistroma	W30O_epistroma	W30P_epistroma	W30P_tumorstroma	W30FW30D_epistroma	W30FW30D_tumorstroma	W30XW30W_epistroma	W30XW30W_tumorstroma	W31AA_epistroma	W31AA_tumorstroma	W31AL_epistroma	W31AL_tumorstroma	W31C_epistroma	W31C_tumorstroma
1	-0.191342	-3.04161	-0.0410705	-0.558045	-0.107651	-2.09342	-0.719856	-2.55563	-0.158713	-1.15867	-0.510221	-1.48662	0.532777	-2.02245	0.377613	-2.24314	-0.26564	-3.14921	0.135638	-1.12588	-0.223631	-1.98195	-0.814072	-0.802727	0.206164	-2.05581	0.0392318	-2.39683	0.590646	-3.1594	-0.146176	-0.221696	-2.10975	-0.73655	-2.68227	-1.02958	0.495828	-0.123517	-3.29685	-0.753356	-2.25771	-1.32978	-2.1855	-0.140131	-3.10169	-1.20924	-1.11832	-0.65367	-2.26116
2	3.79829	-2.04296	4.57451	0.184567	3.10549	1.72951	3.70004	-0.130143	4.60175	1.85652	3.67925	0.584114	2.18349	-2.2803	5.35473	-2.87275	7.77982	3.12132	4.92508	-0.421803	0.493686	-1.64653	1.75299	4.24514	0.707676	-1.88398	2.84474	-0.0874672	6.49589	1.09023	5.71702	1.54613	-0.632248	2.48204	0.109486	3.83032	5.8154	5.5295	-0.470845	3.25368	-0.731709	4.05428	-1.33427	2.54297	0.76403	0.431719	2.74871	0.906509	-3.09791
3	8.04809	0.865928	8.88346	6.68649	8.87977	6.68349	8.23442	6.73813	7.66769	6.7419	6.16022	1.17378	8.26352	3.96271	8.91672	5.32369	8.45917	7.62589	7.44362	6.71496	7.74528	3.49171	7.45762	5.77137	7.43107	3.43707	8.5045	4.01678	8.66981	5.92222	8.57445	7.02358	4.62199	6.48019	6.23927	7.0987	8.82349	8.05365	3.46395	8.45983	5.28747	7.49845	3.81469	6.60616	6.06014	7.21098	7.32657	8.02063	2.96723
4	5.1249	1.49402	6.09688	3.67617	5.7443	2.32272	5.01589	4.90571	5.09426	3.80863	3.12019	0.438622	5.98822	0.713102	3.8526	2.70429	4.24168	3.18096	5.20185	3.29681	4.41185	1.94153	5.26635	3.35582	4.49123	0.76903	5.93133	2.43655	6.25102	3.18599	5.84059	4.71546	1.88435	3.46862	2.70911	3.63613	5.53269	5.49227	2.82959	5.1204	3.52678	4.06833	2.10579	3.12098	3.03286	3.69406	3.87012	4.19632	1.09083
5	0.487131	-2.81301	1.97617	-1.15808	1.73321	-0.720196	0.878343	0.00553703	1.52081	-3.40884	0.132088	-3.00914	0.931152	-3.18532	0.261624	-0.469302	0.537371	-0.348676	2.16939	-0.273847	0.377458	-3.98308	0.739341	-0.601686	0.500833	-4.01372	1.55748	-0.689704	1.92749	-0.15142	1.27301	0.00937557	-2.42352	-0.318465	-0.973559	-0.207213	1.41397	0.864017	-1.40324	0.746274	-1.76221	-0.461355	-1.29338	0.363353	-0.0626497	-0.469013	-0.253034	0.625952	-1.279
6	7.12326	-0.293344	7.98357	5.39365	7.01511	3.63686	7.31193	6.55075	5.67665	5.34539	4.86026	-2.24965	7.24251	1.65444	7.88936	0.4424	7.68154	7.09317	5.61504	6.04604	6.79203	2.60132	6.44486	4.42656	7.873	-0.854657	7.36819	1.10265	6.2894	4.05439	7.25166	5.81094	3.56349	5.44795	5.15064	6.34751	7.17373	6.73767	0.963581	7.07301	4.59379	7.49335	1.90087	4.84861	3.05852	6.60879	7.0008	7.07848	-1.03125
7	0.842274	-2.40391	-0.0171304	-0.761745	0.718497	-1.48824	-0.841198	-2.36225	0.396388	-1.66522	-0.752385	-2.58432	-0.00727463	-2.76431	0.29928	-2.99201	-0.450861	-0.40085	-0.080256	-1.69502	0.619612	-2.27875	-1.04444	-1.36619	-0.942356	-3.36041	-0.00849295	-1.98916	0.687021	-0.405766	0.839835	-0.735696	-1.9914	-0.569475	-2.82941	-1.02504	1.27076	0.00696373	-2.70308	0.0483389	-2.54819	-0.696275	-2.11998	0.467307	-1.1325	-0.409733	-0.135446	-1.26574	-1.85553
8	2.64029	3.87427	2.17181	5.24035	3.0336	4.62347	2.07018	3.98861	2.5237	4.10661	3.19029	4.68706	1.23061	4.32372	1.14906	4.0131	2.01672	3.91086	2.26265	4.45348	1.09239	3.63686	2.22152	4.20822	2.08616	4.13287	2.30176	4.134	2.70401	4.00012	1.77567	3.19658	4.57393	4.67478	3.64596	1.35741	2.05881	1.92103	4.75996	1.60069	3.23156	3.25316	5.00664	3.75637	4.29658	0.53444	1.49697	3.6517	4.83484
9	0.561274	3.90334	0.370234	3.53423	0.381702	2.67469	0.458899	2.50567	0.485505	2.09363	1.92229	3.60539	0.455432	1.70601	0.391893	1.75326	0.960261	1.6271	0.141574	2.26419	0.761841	1.41835	0.489488	2.36725	0.791472	0.975467	1.05853	1.97092	1.0072	2.4468	0.261568	1.51712	0.978535	0.7677	2.88881	0.124115	0.395409	0.273293	3.77322	0.493406	1.90795	1.76617	2.40611	2.254	2.03864	0.38927	1.08416	1.41891	2.79135
10	2.4192	-2.85887	-0.374047	-3.20832	1.67869	-1.13399	-2.45683	-2.38638	0.641636	-1.27172	1.50768	0.885698	-1.33227	-3.22653	1.99875	-0.529779	1.14876	0.157727	1.66002	-1.53474	-0.121311	-3.27546	-1.29013	-1.52517	2.36529	-2.34741	0.476381	-1.82383	5.62227	0.547593	2.22299	-1.18643	-0.393139	3.41139	0.970608	0.496548	1.67025	1.27162	1.46383	2.56014	-1.01564	3.19398	-0.657124	2.6228	-2.46444	2.39536	-2.36206	2.39856	-1.99464
11	0.249028	-1.69172	-0.264052	-3.25548	0.215136	-2.13263	-1.45145	-2.75829	-0.182257	-2.81403	-1.38426	-0.944558	-0.287531	-1.97804	-0.666605	-3.64542	-0.514432	-0.498933	-0.954719	-3.28468	-0.115585	-2.79372	-1.01415	-1.44317	-0.315003	-3.11795	-0.694428	-2.93384	-0.0356035	-1.13818	-0.501747	-0.311666	-2.46973	-1.35086	-2.42241	-1.34994	-0.361507	-0.488778	-2.53905	-0.696446	-3.02884	-1.20565	-2.20363	-0.596556	-2.3931	-0.379121	-0.698703	-0.5281	-2.15312
12	4.8073	1.44324	4.27766	1.41875	5.21062	0.91892	3.10912	1.27753	4.52035	0.870655	2.86986	1.36727	4.40985	-0.505758	4.09653	-2.2862	4.64876	4.83157	2.391	2.34015	4.48299	0.909462	2.64866	1.61293	4.5121	-0.167826	3.90497	1.55768	4.81958	3.99489	4.0496	4.6135	1.7728	3.15191	1.31312	2.536	4.79175	3.66713	2.34641	3.79865	0.347111	3.91359	0.646488	4.68981	1.91858	4.03883	3.87985	4.85329	2.21571
13	-1.19443	0.740815	-1.33993	1.12233	-1.61212	0.606083	-2.16317	0.409138	-1.57463	-0.492184	-0.503363	0.879987	-1.0041	-0.0732918	-0.900568	-0.816742	-1.22389	-0.599034	-1.80041	0.501678	-1.08508	-1.13718	-1.6146	0.5452	-1.01321	-0.404665	-0.836394	0.103065	-1.07941	0.696795	-1.21667	-0.846594	-0.534822	-1.27395	0.298623	-3.02266	-1.32439	-1.53368	0.98371	-2.50593	-0.156124	-0.310091	0.699445	-0.708598	0	-3.38227	-0.278899	0.0496583	0.861308
14	1.13991	4.29433	1.30188	4.31374	1.46999	4.2498	1.64053	3.63619	1.15783	1.78378	0.479945	4.48406	1.0999	1.52604	-0.297125	1.42555	1.14268	2.29545	1.17415	3.21384	0.607768	1.5894	1.73841	4.39197	0.778408	1.17758	1.57487	3.33807	1.75263	3.6919	1.50478	2.62736	2.81518	1.72271	2.79424	1.32481	1.20196	0.718755	4.09194	1.1479	2.71943	2.13287	4.38513	1.16208	2.23146	0.320463	1.02917	3.11148	4.28334
15	-2.65194	2.6357	-3.20527	1.98956	-2.37054	0.41542	-3.34548	0.503003	-2.0774	-2.51597	-1.65171	-1.32951	-2.21847	-2.2077	-1.82401	-0.743706	-1.86981	-0.99973	-0.736572	0.236346	-2.56091	1.93072	-0.535422	1.16594	-2.01576	3.12226	-0.497087	4.03041	-1.94991	-0.417106	-2.45409	2.28284	0.880029	-0.371239	1.42743	-2.38312	-3.15609	0.764769	0.761439	-2.7153	0.644789	-0.51126	2.26828	-3.12978	-0.121463	-2.28145	-3.03338	-0.403074	-0.0283985
16	2.84545	0.529622	2.70867	0.758512	3.16503	-0.373649	1.676	0.648173	2.71271	-0.517258	1.01723	-3.07159	2.64038	1.35952	2.46265	0.46004	2.3636	2.09181	2.33668	0.178836	2.96209	0.102273	1.90115	0.7561	1.73363	1.04854	2.28431	0.194565	2.08039	1.12199	2.94171	1.39287	0.607735	0.941886	-0.105189	1.35961	3.1299	2.57735	-0.652298	2.78057	-0.129634	1.38958	0.946786	2.09471	0.75598	1.92867	2.44696	1.27898	-0.0733433
17	6.25501	0.791349	6.93149	5.22866	6.58588	5.14461	6.56739	5.71329	5.63582	5.14125	4.35071	0.983788	6.92832	4.54616	7.22847	4.68168	6.50885	6.0222	5.52344	5.31233	6.27031	3.06051	5.8364	4.42361	5.74503	3.84982	6.34497	3.1085	5.96347	4.12976	6.77346	5.15404	3.68577	4.7455	5.23869	5.9086	6.94176	6.21321	2.44148	6.76741	3.96035	6.23308	3.30832	5.04592	4.4638	5.25948	5.69373	6.17681	2.13138
18	7.71805	3.57171	7.6544	5.54668	7.28009	4.99737	6.42342	4.75355	7.31422	5.23006	6.69718	4.23279	7.01206	4.24174	6.46255	4.93487	6.69987	6.92228	6.30952	5.46453	6.97149	4.21964	6.19195	5.64879	7.67528	4.13276	7.08653	5.37611	6.8487	6.63554	6.88575	7.13487	5.35066	5.55719	4.86502	5.99065	6.52286	6.67209	3.70488	6.39808	4.24322	6.34173	4.19162	6.41804	4.84654	7.16435	6.72137	6.64076	4.85265
19	-0.25195	-2.90613	-0.328616	-2.85772	-0.428278	-2.09563	-1.1657	-2.00549	-0.260468	-2.99709	-1.26936	-1.89094	-1.04699	-2.64093	-0.940609	-3.27364	-1.18132	-3.02539	-0.255938	-2.43422	-0.571877	-2.85781	-0.657909	-1.39625	-0.4182	-2.50936	-1.09758	-2.69371	-0.533607	-0.856403	-0.445958	-0.54574	-1.97899	-1.77865	-1.9568	-0.908065	-0.689739	-0.656427	-2.29982	-0.678789	-2.76055	-1.38047	-2.59936	-0.774899	-2.29626	-2.16455	-3.0013	-1.43191	-2.32845
20	-3.47395	1.95372	0.469692	3.30123	0.661522	3.45273	-1.63234	1.93677	0.402802	1.52121	-1.76677	2.89845	0.423506	-2.82418	-3.01145	0.559404	-3.03152	0.86416	0.759181	2.37345	0.196137	1.47452	2.07244	2.49133	-1.96927	3.06426	1.04723	3.99372	0.646894	1.14105	-1.92046	1.17634	4.48641	-1.49085	1.83796	-2.30877	0.0119848	-0.173285	2.57267	0.519059	2.68547	2.22068	4.70865	-3.54319	2.74919	0.063796	0.129381	1.20192	5.75618
21	0.299404	-3.55606	-0.239625	-2.39353	-0.121816	-2.47114	-1.05499	-1.0694	0.054327	-2.86718	-0.500152	-2.70046	-0.297762	-2.77853	0.165938	-1.10206	-0.186792	-0.343844	-0.202188	-1.05401	-0.053793	-1.77272	-0.351069	-0.782774	-0.427124	-2.33123	-0.390873	-2.77907	0.00760365	-0.457974	-0.316076	-0.332067	-1.80785	-0.879713	-2.38664	-0.675272	-0.148608	-0.386062	-1.22729	-0.529159	-2.67619	-0.619461	-2.28017	-0.0334425	-3.21148	-0.219598	-0.365039	-0.261119	-1.1328
22	-2.59106	-0.397905	-1.77148	0.317935	-3.42435	-0.396979	-1.30992	0.0396681	-2.80971	-0.811769	-2.15477	0.269399	-2.32077	-1.85597	-3.04891	-2.2735	-2.7216	-1.04386	-2.87558	-0.490469	-2.18902	-2.40939	-2.28295	-0.43839	-1.00531	-1.35612	-2.21362	-0.686553	-1.34542	0.259242	-2.94744	-0.635593	-0.517664	-3.26202	-0.257519	-2.6826	-2.72416	-2.07085	0.0899115	-2.6691	-0.906105	-2.0097	-0.341662	-0.893776	-0.475889	-2.23634	-3.01396	-0.610679	0.0151672
23	1.94536	2.92401	1.84661	4.33712	2.15781	3.73249	2.30898	4.14646	2.01652	2.55924	1.99777	4.21551	1.79842	2.90647	1.19705	3.3259	2.12096	2.9159	1.94418	3.44194	1.98198	1.61346	2.09911	3.79427	2.7931	3.88263	2.65138	3.26854	2.03296	3.86851	1.62229	2.42529	2.92519	1.18177	3.50578	1.68633	1.86984	1.8256	3.31663	2.07068	3.12796	2.73254	3.84037	2.2876	3.23379	1.6701	2.03266	2.65832	3.36033
24	0.279801	-2.60767	0.0962653	-1.40786	0.101457	-1.20214	-0.818838	-1.91655	-0.161654	-1.49052	-0.116059	-1.00044	0.141707	-0.578255	-0.30623	-0.699982	0.123437	-0.694158	0.0852265	-0.762357	0.36457	-1.82982	-0.340847	-1.3759	-0.236982	-1.31892	-0.263037	-1.82758	0.0887709	-1.06207	-0.390833	-0.293332	-1.62193	-0.658836	-1.33144	-0.788696	0.58453	-0.295886	-1.49234	-0.671932	-2.64412	-0.35917	-1.43615	-0.452441	-1.91249	-0.130254	-0.563389	-0.652615	-1.59011
25	-0.34156	-3.06239	-0.650078	-2.61372	-0.585946	-1.39667	-1.06162	-3.23269	-0.507524	-2.17627	-1.2362	-2.53201	-0.885918	-3.19766	-0.443168	-2.40508	-0.960754	-1.28458	-1.08893	-2.29185	-0.538349	-4.11286	-1.48237	-2.49854	-0.633834	-1.78115	-1.15084	-1.83871	-0.832342	-1.08472	-0.877263	-0.977338	-1.93606	-1.08826	-3.12064	-0.935952	-0.738982	-1.10856	-3.36299	-0.317663	-2.37979	-1.38457	-1.97468	-1.21784	-1.29251	-0.622573	-1.11231	-0.645964	-1.94575
26	-3.18013	2.66466	-2.69917	1.07633	-2.85614	1.02997	-1.22613	-0.132697	-1.37213	0.203399	-0.895321	0.617716	-2.82522	-0.841395	-2.37745	-0.944299	-2.93205	-0.263801	-2.83827	0.477036	-2.78085	-1.37029	-1.2687	0.0773921	-0.747974	-0.807349	-0.90273	-0.355899	-1.8962	-0.468575	-2.83124	-0.43459	-0.879379	-2.32671	-0.457625	-1.98024	-1.55241	-3.09591	-0.359586	-2.30006	-0.56069	0.387674	0.245599	-0.497664	-0.260779	-2.02127	-1.26809	-0.38334	-0.332416
27	1.93502	5.06357	1.64494	4.51729	1.61569	4.52185	1.78118	3.72392	1.35869	1.52157	1.25151	3.14228	1.89759	2.89055	1.07026	2.76262	1.71459	2.75021	1.93044	4.01142	1.60447	2.27814	2.89102	4.18632	1.68081	3.09957	1.85665	4.57363	1.74519	5.20119	1.13018	2.58396	3.56829	4.35079	3.49271	1.65846	1.6785	1.49837	4.17352	1.12793	2.52868	2.57883	4.50495	1.64698	2.87547	0.960128	1.68502	3.66491	4.36292
28	0.177357	2.29482	0.256836	2.51136	0.0235133	1.50557	0.105569	1.9269	0.20085	1.6095	0.423512	2.15109	-0.119646	1.92773	-0.311299	0.460855	0.290479	1.01684	-0.078114	1.34995	0.138236	0.46127	-0.243214	1.26559	0.370807	1.05004	0.693018	1.24594	0.137878	1.98169	-0.229722	0.707661	0.420222	-0.343531	1.33922	-0.454002	0.13672	0.0299273	1.60312	-0.316213	0.894654	1.14565	1.68174	0.961328	1.13066	-0.251464	0.566705	0.957067	1.65237
29	-0.634408	3.3152	-0.947828	1.42847	-1.1022	2.43572	-0.992934	0.193233	-2.52292	0.443895	-0.421288	2.52201	-0.868356	0.197097	-0.191007	0.213597	-0.377644	0.930611	-0.93379	1.70472	-0.565794	0.0399032	-0.796951	1.63336	-0.849917	0.246507	-0.524923	1.17129	-0.282024	1.38559	-0.806721	0.53262	0.471151	-0.598545	0.777025	-1.08792	-0.484241	-0.838671	2.29126	-0.303867	0.871526	1.71674	1.46429	0.592129	1.09691	-1.6618	-0.752397	0.914895	1.57532
30	1.26597	0.0250998	1.75919	-0.347662	0.880085	-0.03967	1.50707	1.06922	0.415789	-3.25215	0.848881	-2.05641	0.533895	-2.61091	1.14969	-3.22564	0.0203333	0.210949	1.58989	0.169256	0.941536	-2.93002	0.828873	0.636289	1.22756	-2.61028	3.1323	-2.25376	0.7975	0.701685	0.808506	0.993044	-2.00036	0.284254	-2.61584	1.21663	0.856253	1.24484	-2.4466	0.855955	0.929445	0.366059	-2.56345	-1.83202	-3.0854	1.13516	0.774035	0.259656	-1.90566
31	0.736454	-2.0907	1.04153	-0.589493	1.25737	-0.470695	0.356781	0.129226	0.149949	-0.645581	-0.236417	-2.62735	0.629602	-2.68774	0.176567	-2.20995	0.698408	0.166522	0.881136	0.17818	0.985729	-3.23194	0.574646	-0.405196	0.894338	-2.41372	0.525635	-1.7231	0.315349	0.261765	0.57842	0.482374	-2.60378	-0.486549	-0.340015	0.233412	0.587615	0.558142	-1.0628	0.331853	-1.89434	0.455339	-2.66219	-0.0961733	-2.66433	0.0679007	0.0252743	-0.187613	-2.9273
32	-0.18814	0.331662	-0.251787	1.02412	-0.310018	1.00162	-0.256894	0.718514	0.0310593	0.57949	-0.0568199	1.37888	-0.422185	0.9901	-0.615493	0.739833	0.405067	0.467452	-0.2007	0.969181	-0.194003	1.13924	0.0867167	1.29104	-0.218232	1.03336	0.0600667	1.57352	0.212554	0.566639	-0.225947	0.22893	0.869774	-0.0762997	0.652557	-0.367239	-0.259474	-0.454819	1.0524	0.0497227	0.829957	0.703866	1.38799	0.246042	0.756886	-0.549371	-0.134233	0.318612	0.917508
33	0.604516	-2.6005	0.478376	-0.732191	0.637886	-1.36235	0.413131	-0.510983	0.72434	-0.683429	-0.106043	-2.86504	0.462841	-2.56915	0.0455918	-3.45291	-0.0234432	-0.569475	1.66145	0.582374	0.273303	-2.22581	2.09903	-1.06118	0.167272	-1.8596	1.73063	-2.73219	0.333062	0.814157	0.959161	0.466045	-2.11808	-0.91229	0.0462103	0.557396	0.193086	1.04548	-1.52707	0.624681	-1.27777	0.195789	-1.94734	-0.811585	-0.437559	0.335279	0.676924	-1.23486	-2.20679
34	2.28871	4.54712	2.76824	5.19587	2.07539	4.08217	2.50065	4.58803	2.76548	3.71146	2.90858	4.14688	1.89679	3.23891	1.71184	3.52425	2.32533	3.64573	2.42647	3.94122	2.01293	3.36919	2.46399	4.42792	2.88806	2.96899	3.24771	3.84107	2.44525	4.15419	2.0201	3.27128	2.95809	2.96244	3.60512	1.99222	2.69269	2.37661	4.92294	2.22551	2.98395	2.9073	3.9423	3.50553	3.3519	1.59241	2.43833	3.69419	4.08294
35	3.04919	3.65471	3.20876	5.02217	3.03054	4.58817	3.13341	4.78033	3.02206	4.00127	3.92964	5.22299	2.88949	4.26715	2.2615	3.95627	2.98762	3.72703	2.87245	4.25813	3.10676	4.22599	3.02694	4.25012	3.19755	4.31544	3.50392	4.30143	3.55887	4.26114	2.84316	3.79789	5.02385	4.31633	3.9991	2.8489	2.72484	2.94572	4.88023	2.6048	4.19147	3.78586	4.82399	3.76963	3.8142	2.32397	2.8474	3.38383	5.27503
36	-2.7174	1.00409	-1.48802	0.429309	-2.56048	0.490586	-1.14858	-0.183747	-2.13513	-2.22138	-0.990221	0.280452	-1.80058	0.0766325	-2.02429	0.7895	-2.93687	-0.28698	-0.45908	-0.0565639	-2.59821	0.549864	-0.828935	0.345479	-2.8222	0.754254	-0.427778	1.36365	-2.91103	-0.437121	-0.094008	-0.367447	2.54854	1.01372	-0.449343	-0.994832	-2.65911	-1.14034	0.748031	-3.08624	0.112483	-0.435354	1.08408	-2.59418	0.465518	-1.93793	-0.553266	-0.712311	2.39853
37	-1.60805	1.1595	-3.24474	1.03575	-0.796523	0.271961	-2.92143	-0.0547209	-1.22779	0.028964	-0.0302334	1.31529	-1.51897	-0.481899	-2.6169	0.019155	-0.965776	-0.305905	-2.59521	0.266322	-2.49817	-0.654077	-1.66469	0.179833	-3.00125	-1.35083	-0.974669	-0.37843	-0.895733	-0.0928659	-2.60491	-0.896048	-0.813245	-0.827785	0.625593	-2.04365	-3.0752	-2.47427	2.26451	-1.47569	-0.0363255	-0.523149	-0.242884	0.299104	-0.065465	-1.99227	-2.19458	-0.827837	0.371579
38	-2.29877	-0.503603	-2.31228	1.70294	-2.99865	0.449726	-0.777293	0.14072	-2.29565	-0.616218	-1.19469	-2.43408	-3.49016	-0.0543118	-1.73287	0.668111	-3.00573	-0.414531	-0.258533	1.55669	-1.72456	0.737109	-0.580952	0.489835	0.379048	2.45694	0.227228	2.31605	-2.3374	0.481356	-2.81184	0.555182	2.63898	-1.68378	0.318564	-1.36942	-2.08907	-0.549213	1.41435	-0.777269	-0.649007	-0.680446	1.66706	-1.52951	-0.218148	-2.41808	-0.615425	0.197093	1.30418
39	5.10279	2.44892	5.35033	3.77743	5.43724	3.49155	4.87333	4.01718	5.53941	3.00797	4.15821	2.87193	5.00169	2.7997	4.77708	4.4187	4.75874	4.69276	5.42977	3.96285	5.07137	2.21628	5.70965	4.30077	6.17453	3.52942	5.41945	3.92573	5.0835	5.06723	5.0824	5.72588	3.7611	4.90577	3.10243	5.01676	5.04975	5.52554	4.10311	5.34187	3.27202	4.67766	3.37856	4.06958	3.81176	4.40382	4.42466	4.67645	3.42493
40	2.10317	0.0910816	2.32234	0.346516	2.10366	-0.785632	0.856758	-0.0246611	1.29312	-0.268723	0.8963	-2.41291	1.71785	-0.26731	1.8549	-0.852962	1.64688	1.13566	0.662483	-0.157649	2.40678	-0.430583	0.229123	-0.752837	2.37559	0.39227	1.9247	0.103045	2.33828	1.37152	1.86623	1.4375	-0.832534	0.840958	-0.88736	0.877337	1.98032	1.15993	0.583379	1.35298	-0.13953	1.10223	-0.553919	1.2299	0.0740204	1.56345	1.29428	1.47254	0.0695915
41	-2.353	2.31007	-1.81115	-0.256984	-1.90625	1.19238	-2.72762	-1.26518	-2.77943	-1.67632	-2.86009	1.2564	-2.6846	-1.08765	-2.84651	-1.13228	-1.38884	-0.573295	-1.8056	0.0772691	-2.67591	-2.41038	-1.80779	0.465656	-2.87524	-0.620064	-3.22772	-0.238526	-1.96871	-0.391632	-1.61617	-1.43946	-0.656714	-1.51424	-0.663439	-3.19842	-1.5819	-1.80002	1.25744	-2.51978	0.139724	0.474741	0.612177	-1.22827	0.458975	-3.22982	-2.58763	-0.905701	0.682105
42	0.663788	-3.4004	0.395463	-0.743978	1.82407	-1.11123	-0.0210981	-1.22103	0.43091	-0.509403	-0.484633	-2.50369	0.197307	-3.07883	1.15488	-0.681912	0.440073	-0.0341072	1.11471	0.185499	0.857794	-3.57689	0.260737	-0.853479	0.169847	-1.03994	0.16446	-1.76232	0.978196	0.0320902	0.961694	-0.0108538	-1.68753	-0.224207	-0.362423	0.403801	-0.149693	-0.424573	-2.111	-0.928576	-1.58735	-0.094265	-2.55082	0.556388	-0.692021	0.359721	0.286373	-0.0242858	-3.09022
43	2.08071	4.76871	1.62849	5.10083	1.9672	3.73555	1.89705	4.63286	1.8925	3.5134	2.45267	3.841	1.80619	2.37459	2.04664	2.00246	1.9466	2.96477	1.35663	4.03378	2.12756	1.97346	1.71884	4.19306	2.69748	1.59221	2.57695	3.45387	1.92452	4.68708	1.35413	2.77291	2.87786	1.85799	3.58007	0.883645	1.96183	1.46974	4.10692	1.23401	2.9709	2.9541	3.95471	2.92034	3.11878	1.02491	2.31916	3.44685	3.83804
44	1.76716	3.55746	1.60134	3.83963	1.8943	3.35765	1.25562	2.91102	1.92032	2.18346	2.08296	3.46256	1.32332	2.79477	1.12633	2.72461	1.77526	2.51075	2.20877	3.29762	1.38525	2.17072	1.90843	3.66766	1.65835	2.45265	2.30965	3.44141	2.25341	3.03594	1.30474	2.33796	3.34745	2.71597	2.38882	1.25279	1.83634	1.67098	3.76809	1.3775	2.45906	2.43927	3.54062	2.32198	2.88118	0.662148	1.71972	2.63899	3.86559
45	-2.64388	1.1958	-2.44619	0.14385	-2.77442	0.356836	-2.7352	-0.227332	-2.68008	-2.82617	-2.72611	1.32948	-2.11337	-1.82677	-2.62338	-3.43052	-3.07268	-0.352532	-2.97132	0.0906405	-2.55279	-2.7077	-2.59743	0.0255656	-2.37965	-1.02072	-2.77252	0.106053	-2.35079	-0.209989	-3.20701	-3.49124	-0.552714	-3.0849	0.0650301	-2.3028	-2.75051	-1.66309	0.0736074	-1.70689	-0.111199	-1.84122	0.340112	-0.604279	0.191419	-1.88803	-0.968713	-0.567441	0.664844
46	2.14831	-2.83075	1.78309	0.436149	1.69669	0.263591	1.33014	-0.0993948	1.50983	0.262086	0.0304308	0.00590324	1.57138	-0.0292435	1.72386	0.427467	1.49377	0.860934	1.5121	1.14655	1.78463	-0.313894	1.3826	0.093348	1.87177	0.0688686	1.4773	0.299901	1.57825	0.428679	1.10048	0.852282	-0.287257	0.398229	0.265211	0.907344	2.23689	1.66914	-0.089819	1.07504	-0.333868	1.64856	-0.327829	1.59651	0.702403	1.09309	1.25601	1.27511	-0.627225
47	-1.80291	0.791183	-3.01298	0.201093	-1.88781	0.674154	-3.02789	-0.866652	-2.90523	-2.78029	-2.84828	0.694825	-3.37694	-0.531389	-2.65901	-0.949716	-2.80739	-1.52986	-1.56974	-0.736058	-2.1408	-2.42438	-1.9051	-0.584283	-1.40358	0.268302	-1.91194	-0.21181	-1.79992	-1.0749	-2.22472	-1.33245	-1.37745	-0.846791	-0.947658	-2.14329	-1.69183	-1.8126	0.0488262	-1.79013	-0.535415	-1.05643	0.118721	-2.12958	-0.769703	-2.29378	-1.67445	-1.07887	0.410115
48	-0.549254	1.26889	-0.585307	1.48114	-0.607718	1.0441	-0.464008	1.16166	-0.383213	0.511946	-0.241693	1.07754	-0.935159	0.0527668	-0.581865	0.0167279	-0.620402	0.00686264	-0.89312	0.92136	-0.81251	0.131303	-0.482878	0.751773	-0.304265	-0.421399	0.0227208	0.284507	-0.70327	1.05847	-0.890443	-0.152124	0.0222702	-1.04325	0.419919	-0.582631	-0.499982	-0.682974	1.0495	-0.905794	0.390339	0.466973	1.00913	-0.116241	0.49452	-1.8571	-0.72097	0.107956	0.836711
49	1.13131	4.18013	1.26077	3.64707	1.25322	4.22646	1.2432	2.62083	1.0326	1.02052	0.926227	2.94043	0.757228	2.39647	1.05366	2.65342	1.17367	2.01596	0.631619	2.69922	0.756653	1.98295	1.4073	3.12821	1.56575	2.47991	0.64876	3.30983	1.62729	4.14299	1.47013	2.29131	1.72861	3.52001	2.91222	1.04257	0.734435	0.213867	2.95905	0.101867	1.27376	2.24605	3.11949	1.29545	2.35672	0.753489	1.5283	2.75937	2.89795
50	-0.799178	-0.411396	-0.391111	-0.0784225	-2.19877	-0.00402069	-3.02938	-0.121405	-2.89695	-0.849524	-0.373035	-0.99115	-2.78786	-0.388055	-2.53445	0.385007	-0.394017	0.874537	-3.01732	-0.308077	-1.25475	-0.946429	-0.992085	-0.0403676	-2.89915	-0.873799	-0.564479	1.12548	-3.0181	-0.242761	-2.75291	-0.17091	0.953602	-2.49157	-0.648161	-3.09703	-1.01541	-3.1632	-0.489152	-2.4215	-0.348849	-0.395096	0.561798	-2.89651	-2.46621	-2.1077	-2.18789	-0.445652	0.764389
51	-0.203391	1.62187	-0.34925	2.25416	-0.194466	2.79263	-0.305668	1.4482	-0.351315	0.0440254	-0.459557	1.506	-1.16249	0.982013	-0.62576	0.867131	0.317828	1.06638	-0.590735	1.18269	-0.283201	0.731006	0.161148	1.22357	0.0146074	0.735662	-0.575853	2.11167	0.261401	2.78945	0.0459552	0.738642	0.227188	0.206636	1.14594	-0.397762	-0.691857	-0.947024	0.873103	-1.34411	-0.206768	1.04423	1.33333	-0.28324	0.769073	-0.446739	0.250533	1.64251	1.3729
52	0.584367	-2.36438	0.357808	-0.713636	0.980297	-3.11656	-0.32826	-0.995377	-0.314929	-0.725234	-2.80557	-2.16951	-0.224065	-2.56635	-0.404605	-3.05272	0.0673456	-0.0667658	-0.199481	-0.375443	0.470963	-2.86447	-0.00158501	-0.863942	0.256989	-2.41987	0.145089	-3.46133	0.0527	-0.0355902	-0.232487	0.0775528	-1.71571	-0.855416	-3.02271	-0.293277	0.311245	-0.047266	-2.3517	-0.0832224	-3.08054	-0.173152	-1.2342	-0.313179	-2.42247	-0.218926	-0.160724	-0.144945	-1.98203
53	-0.0845075	0.691257	-3.04044	1.40641	-0.161808	1.03824	-0.406808	0.596139	0.551346	0.346684	0.200934	1.61719	-2.57859	1.16768	-2.33742	0.973722	-0.0482807	0.460513	-2.39254	1.04702	-0.0183411	0.910594	0.104184	1.3769	-2.84917	1.41678	-2.2957	1.67258	0.660213	0.766427	-0.323077	0.645345	1.50359	0.205839	0.405367	-1.76316	-0.282824	-2.44273	1.75207	-0.14016	0.930091	0.652552	1.65626	0.628686	0.860869	-2.40648	-0.470622	0.206032	1.62562
54	7.47314	3.02637	7.30415	5.72509	7.97479	6.01845	6.78317	5.80289	6.12535	5.07657	4.68794	0.959901	6.98201	3.0811	7.41748	6.01751	7.20512	7.30765	6.21707	6.52752	6.39217	3.15251	7.00113	5.99197	5.94403	3.52795	7.12319	4.24975	7.20292	5.2243	6.9815	5.72478	5.2482	5.25681	5.45387	5.89272	7.41491	6.77838	3.38024	7.12579	4.06096	6.21853	3.8405	6.06229	5.35602	5.79924	5.9982	6.67961	4.75235
55	0.859179	1.60016	0.931951	3.42131	1.19564	2.78249	0.824229	2.82637	0.925362	1.70675	1.0178	3.3884	0.927255	1.45362	0.676992	1.32955	0.990236	1.78901	0.625337	2.60595	0.953936	0.918787	0.763224	3.02998	1.12195	1.1095	1.33864	2.67724	1.23686	2.63762	0.59544	1.31413	1.40132	0.754327	1.99342	0.0777693	1.1389	0.569056	3.20796	0.649622	1.65851	1.43581	2.76128	1.2048	1.97087	0.119469	0.937698	2.14256	3.01267
56	3.68538	5.81541	3.80748	6.78734	4.12703	5.8198	4.18616	6.26143	3.88056	5.24657	3.94083	5.55773	3.55209	3.88589	3.12588	3.90172	3.56052	4.84439	3.15668	5.56439	3.61533	3.92098	3.48842	5.77876	4.22121	3.41129	4.564	5.09763	3.67694	5.76299	3.30105	4.6232	4.85868	3.524	4.90374	3.03573	3.63488	3.32703	5.69571	3.50287	4.89915	4.66806	6.02667	4.3452	4.44177	2.88577	3.62793	5.03118	5.48493
57	6.56736	1.86145	6.64229	5.61985	7.27175	5.17043	6.25965	5.66899	5.97939	4.11895	5.57845	3.59992	6.02419	4.69525	5.63288	5.46777	6.3465	6.50441	6.16329	5.03933	6.58208	4.52892	6.62914	5.8172	7.19095	3.74764	6.79795	4.81259	6.75133	6.39023	6.13943	6.62355	3.75597	5.09428	4.38308	5.83125	6.44063	6.59794	4.52525	5.75142	4.29048	6.06387	4.1493	6.17822	5.05613	5.46213	5.49423	6.76103	3.68529
58	-0.986919	2.43563	-0.924177	1.73142	-0.797647	2.81563	-0.85175	0.245492	-1.03165	-1.15354	-1.48662	-0.111146	-1.51504	1.12296	-2.19804	1.05251	-0.94644	0.342793	-1.35703	0.998085	-1.29498	0.895346	-0.86354	1.18422	-1.30747	0.187267	-0.768607	1.9122	-0.500731	2.32231	-1.29973	-0.047226	-0.294807	2.28464	0.512954	-3.44982	-2.52801	-2.56875	0.707673	-1.30962	-0.883524	-0.139284	1.5064	-0.988342	-0.250672	-2.02386	-0.521356	1.0947	0.653285
59	-0.152919	0.67833	-0.0860829	2.01345	0.0178151	1.04279	-0.400326	1.11142	0.0656395	1.36463	1.38071	1.47863	0.103996	0.611308	-0.209516	0.48597	0.415739	1.17866	-0.296525	0.730702	-0.256256	1.02885	-0.273779	1.40213	0.155222	1.45543	0.18727	2.33475	0.522259	1.51635	-0.298492	1.03802	0.706766	-1.08969	1.14049	-1.10004	-0.281807	0.00711155	1.03731	-0.625116	1.47769	0.135747	1.90367	0.297734	0.535048	-0.318299	-0.606289	-0.0368667	0.469528
60	-1.38977	2.03943	-1.99693	0.0303097	-3.23594	0.0201864	-2.92421	-0.540431	-1.6994	-1.14528	-2.8399	1.28594	-2.42677	-0.138579	0.714343	-1.0003	-2.11345	-2.60314	-2.63626	-0.864403	-2.26603	-1.1503	-2.94282	-0.521951	-2.97047	-2.40812	-2.38521	-0.688209	-3.3162	-0.448213	-2.62165	-1.3728	-1.47431	-1.62755	-0.861992	-2.13724	-2.8199	-3.14508	-0.0789318	-2.08891	-0.452324	-1.43774	-0.202649	-3.26715	-0.645408	-2.30478	-3.03146	-0.898405	0.168868
61	0.23478	4.22809	0.109252	3.18939	0.34101	3.15963	0.75855	4.18071	1.21084	0.428329	1.56837	1.24062	-0.00270081	3.37118	0.770948	4.19614	-0.138628	1.50963	0.83654	1.71232	-0.235863	1.35093	0.26861	4.02464	-0.216085	3.25754	1.52058	1.59416	0.215809	0.624987	0.129009	1.89071	5.17846	1.49893	1.624	0.568334	0.214277	0.583975	3.14671	-0.0206804	2.05935	1.88396	3.74048	0.141739	0.823684	0.784086	0.105178	0.495671	3.99015
62	2.82373	-2.21042	3.58896	2.1151	3.33099	2.79597	3.59828	2.1357	2.78369	1.84854	2.7844	0.924091	3.13905	-2.74306	3.63377	0.781242	3.72118	2.64425	3.70494	1.16915	1.47482	1.69386	3.54976	1.95232	-0.18546	-2.3694	2.79786	-0.0170765	4.48179	2.58122	4.50147	2.18944	-0.15906	2.72853	1.39616	3.39088	3.73638	2.86256	1.4593	2.11802	0.973639	2.62671	-0.353222	1.65213	2.73651	1.51023	1.83072	4.07106	0.0639505
63	0.741367	-2.59582	1	-0.981714	1.17189	-1.20799	0.219244	-0.741402	-2.05616	-2.51185	-1.26073	-2.21911	0.396354	-1.45844	0.991181	-1.51407	0.894222	0.422934	0.197168	-0.663798	0.0111284	-3.32403	-0.728012	-1.52163	-0.0677681	-3.56022	-0.378197	-2.95713	0.167031	-2.98651	0.476873	-0.883116	-0.890076	-0.763487	-1.34295	-0.0325422	1.21571	0.404385	-2.54656	0.857918	-2.58649	0.466667	-1.57358	-1.0149	-1.72677	-1.08134	-0.327311	0.437603	-1.45449
64	-1.21195	2.73314	-1.14325	2.06708	-1.09707	0.809772	-0.913189	1.6253	-0.931439	1.04885	-0.263588	0.0614586	-1.04547	-0.842913	-0.646901	-0.847764	-2.74392	0.329383	-2.20958	0.456559	-1.50263	-0.996305	-1.45297	0.718362	-0.453235	-1.4487	-0.371241	0.995156	-1.10459	0.928952	-1.07021	0.684447	-0.497941	-1.53804	0.733768	-3.76206	-1.46757	-1.51186	0.0359821	-1.23682	-0.139022	-0.421944	1.03934	0.262251	-0.39454	-1.22828	-0.478745	-0.0332007	0.293029
65	0.246067	2.72946	0.309219	2.23651	0.348764	1.78884	0.330269	1.71403	0.338956	0.697083	0.758842	2.27158	0.0405092	1.44323	-0.49545	1.08304	0.544938	0.805372	0.385087	1.7004	0.180419	0.874804	0.2016	1.99802	0.508266	0.849861	0.196927	1.00601	1.03314	1.75924	0.0486979	0.467428	1.18563	0.366585	0.947396	-0.210736	0.462952	-0.00775909	1.94671	0.301677	1.02392	1.15388	1.90271	0.919768	1.16262	-0.167197	0.321683	0.952915	2.14713
66	-0.395418	0.927766	-0.471347	0.627872	-0.645074	1.39351	-0.699777	-0.50458	-0.196752	-0.151138	-0.136106	1.94274	-1.17237	1.62642	-0.628473	1.39068	-0.654531	0.378268	-0.499313	0.559588	-0.345479	0.114049	-0.825666	0.469148	-0.137833	2.50804	-0.747105	1.89118	0.0541401	0.0607624	-0.576011	-0.249845	1.96122	-0.163901	0.0318298	-1.00307	-0.673198	-0.78945	1.08534	-0.668649	0.476367	0.562643	1.71444	0.100642	1.02589	-0.5862	-0.595243	0.172684	2.70752
67	1.80148	2.63162	0.962638	5.16388	1.02793	4.35083	1.77472	2.67834	0.697313	1.37527	1.53975	1.55305	1.06886	0.419499	0.0919194	2.1326	1.00148	2.41289	2.45713	4.18167	2.07028	2.78868	2.29822	5.17741	4.10388	5.48083	3.31758	7.79038	0.177238	1.9648	0.609955	3.24769	6.88027	0.362381	2.72398	1.55469	0.65684	2.08582	5.46786	2.50594	4.25321	2.17945	6.77086	0.858382	3.63377	0.252533	2.38215	2.90447	5.55083
68	1.40348	0.404528	1.71081	0.356162	2.01748	0.811834	1.3488	1.02919	2.15128	0.789126	1.38629	0.00345421	1.33385	0.122371	1.98419	0.145863	1.1863	0.840668	2.75851	1.86526	1.75698	-0.062614	2.33847	0.947237	1.89556	-0.0547695	1.62396	0.096468	1.82855	1.27928	2.09932	1.55053	0.0470438	0.85424	0.899117	1.56312	1.66653	1.74852	0.619922	1.44169	0.174061	0.990316	0.338142	0.964604	0.621847	1.36372	1.03671	1.39283	0.79287
69	4.02675	1.33929	3.5274	2.4678	4.03901	2.17805	3.25145	2.5414	3.51569	2.0666	2.75587	1.332	3.28868	1.52459	3.45154	2.05563	3.59557	3.02363	3.72971	3.15467	3.58648	1.78647	3.61333	2.90784	3.52952	1.69747	3.5409	2.21737	3.51092	3.18992	3.42355	3.76072	1.78126	2.74057	2.02486	2.84381	3.23692	3.08054	2.56693	2.8988	1.86141	2.98751	1.79008	3.02482	2.38924	2.72794	2.57383	3.12469	1.92532
70	0.38025	3.66792	-0.0625939	2.79292	0.424893	2.33096	0.265414	2.41014	0.0939283	1.64733	0.355795	2.11613	-0.0917311	0.243323	0.389354	0.0409999	0.407399	1.08806	-0.174514	2.17391	0.29763	-0.165999	0.196849	2.04524	0.674635	-0.0789089	0.823293	1.69341	0.495643	2.28107	-0.110911	0.853941	0.932197	0.00337887	1.7974	-1.089	0.358212	-0.0679445	2.12777	-0.40766	1.48548	1.16598	2.0792	0.781344	1.42604	-0.427535	0.521301	1.4617	2.22171
71	-2.5517	0.945893	-2.43352	-0.31368	-2.87853	-0.140881	-2.55169	-2.39808	-2.44705	-2.03876	-2.5365	0.788068	-3.20539	-0.194818	-3.12574	-0.765163	-2.70679	-0.984641	-2.35011	-0.654846	-2.02037	-1.55137	-1.49946	-0.84562	-1.33666	-0.704466	-2.34823	-0.660975	-1.99405	-2.76878	-3.60237	-0.92386	-1.20812	-0.734774	-1.26843	-2.49189	-2.78313	-1.60422	0.190267	-2.79338	-2.25439	-0.732196	-0.337826	-2.20349	-1.1466	-2.61056	-2.56401	-2.66113	-0.0696831
72	-2.04577	1.6219	-2.29441	0.467612	-2.11616	0.0402536	-1.91446	0.14351	-1.69974	-0.57572	-1.22802	0.577632	-2.46918	-1.40199	-2.03768	-0.768178	-1.4524	-1.01899	-2.11153	-0.369667	-2.29837	-1.42558	-2.49761	0.133737	-1.51539	-0.390685	-1.37001	-0.372317	-0.968108	-0.753263	-2.32784	-1.2508	-1.15612	-0.548029	-0.579946	-2.35668	-2.08815	-2.05387	-0.037529	-2.89039	-0.933516	-0.868736	-0.110956	-0.961824	-0.522914	-2.38007	-2.79464	-1.03094	-0.155973
73	3.38071	-1.33302	2.60453	0.261852	-2.57731	-1.65589	0.088829	-0.989697	3.62967	-2.98788	-0.986897	-3.04298	-0.476068	-1.86211	2.25244	-1.2582	2.62232	2.80081	2.18007	-0.293408	1.61203	-1.23385	1.31106	-0.95153	0.614171	-2.98481	0.0775552	1.03346	1.84901	0.240043	3.51744	0.964589	0.0727644	-0.39022	-2.02693	0.172976	4.54825	2.45387	-0.19097	2.30735	-3.10902	1.41674	-0.28102	2.53404	-3.02466	1.18963	1.01984	2.76716	0.847444
74	-0.161951	0.251948	-0.169177	1.43232	-0.115736	1.28852	0.0492697	1.21363	-0.0868073	0.101188	-0.127932	1.376	-0.384966	0.803837	-0.319341	0.470214	-0.254936	0.188633	0.21868	1.22657	-0.0013361	0.19995	0.183259	1.09194	0.161759	1.17864	0.0306392	1.54795	0.0841675	1.20586	-0.393562	0.317857	1.44085	-0.72509	0.697752	-0.306184	-0.0446396	0.00897408	0.952523	-0.32536	0.687752	0.715694	1.1636	0.0582666	0.569586	-2.01861	0.1	0.309431	1.31222
75	0.335315	0.428571	-0.616582	1.66122	-0.292768	1.29872	-0.407681	1.80641	-0.542206	0.75449	0.955645	1.49355	-0.303793	0.967464	-0.505833	0.460027	-0.589721	0.258176	-0.448978	1.22782	0.0984259	1.37974	-0.455216	1.32273	0.129486	1.19816	0.161507	0.98412	0.21867	1.40775	-0.516018	0.830602	1.26818	2.02657	1.08416	-0.226379	0.273042	-0.468729	1.96439	-0.70118	0.991043	0.926542	1.56556	0.44646	0.723436	-1.18213	-0.397547	0.598307	2.00192
76	-1.37841	0.213449	-1.56206	0.150776	-0.975918	0.420795	-2.13259	-1.58037	-1.73707	-1.37911	-1.44731	0.786302	-1.64215	-1.11343	-1.72215	-1.0277	-1.35614	-0.853662	-1.90392	0.0332103	-1.16501	-1.04611	-1.46269	-0.312856	-1.68924	-0.542742	-1.5531	-0.196437	-1.00571	-0.494711	-1.79454	-1.2595	-0.116179	-0.879139	-1.02259	-1.98513	-2.54371	-2.91427	0.0530977	-1.76823	-0.600739	-0.471421	0.33461	-1.65156	-0.884731	-2.18532	-1.75208	-1.66619	0.641998
77	0.229673	1.49064	-0.169378	1.40362	0.539826	1.31098	-0.225502	1.03422	0.223742	-0.163637	0.00557041	1.75953	-0.432829	1.2819	-0.233455	2.00754	0.359721	0.7521	0.214992	0.927781	0.115012	1.64588	-0.142108	1.66468	0.536141	1.31749	0.0402799	1.79167	0.458456	0.988503	-0.0419974	0.885679	1.1876	1.2967	0.203955	-0.16088	0.0517979	-0.462363	1.96843	-0.199025	1.23838	0.459715	2.52516	0.867656	1.72517	-0.503314	0.0966835	0.382494	1.93276
78	-2.13191	-0.972278	-3.87189	0.750027	-2.20729	-0.363086	-2.02961	-0.153255	-1.59944	-0.595342	-0.97042	0.491984	-3.16784	-1.44233	-2.05036	-1.05035	-1.87149	-0.739242	-2.28979	-0.388936	-1.46147	-1.79228	-2.09541	-0.288375	-1.75173	-1.92779	-1.60676	-0.605848	-1.75428	0.224189	-1.9805	-1.03462	-1.36866	-2.05406	-0.0805349	-1.87102	-3.1912	-2.41224	0.731887	-1.39864	-0.965318	-0.760527	-0.154817	-0.549196	-0.767066	-1.47906	-1.29744	-0.843258	-0.138412
79	2.52016	-0.405626	2.08004	0.945164	2.44639	0.187661	1.84397	0.97999	2.0014	0.428623	1.74839	-0.489545	1.93381	0.531762	2.38713	0.699583	2.18178	1.94988	2.48121	1.95108	2.33914	-0.220036	2.74671	1.52511	2.23223	-0.122761	1.91814	1.18572	2.26438	2.44342	1.87993	2.30419	0.781073	1.33016	0.825303	1.9348	2.10733	2.4276	1.40347	2.06943	0.926912	1.95734	0.660275	1.60707	1.5856	1.73479	1.61416	2.22978	0.49644
80	-1.00719	1.23449	-1.9103	1.12653	-1.05869	-0.0650711	-1.14585	0.905534	-1.2814	-0.156717	-0.799777	-0.0161724	-1.2609	-0.868422	-1.13173	-1.14065	-1.20026	-0.741169	-1.31725	0.201628	-0.737488	-1.43634	-1.37493	0.518511	-0.37748	-0.994143	-0.761775	0.195191	-0.775879	0.975909	-1.436	-0.637801	-0.395326	-1.21241	0.0878115	-2.56701	-1.12823	-1.94327	0.363035	-1.54603	-0.259815	-0.727323	0.602766	-1.01325	0.0207491	-2.93149	-0.911752	-0.113851	0.645916
81	-1.88647	1.29027	-1.68032	0.360235	-0.517362	1.01106	-1.39043	0.509145	-0.827135	0.760244	-2.51631	1.6972	-2.75366	-0.740464	-2.1547	-0.574129	-1.30434	-0.424211	-2.34047	-0.158094	-1.57193	-0.718099	-1.66086	1.08143	-1.18674	-1.42794	-0.670545	-0.478623	-0.881607	-1.23262	-2.60309	-1.22047	-0.789481	-0.544216	-0.515143	-1.22851	-1.39652	-1.79456	1.6952	-0.689186	1.99659	-1.34	0.856052	-0.807303	-0.379558	-2.90549	-2.89289	-0.0934176	0.561082
82	-0.677714	2.15094	-0.0952353	2.10067	-0.920465	2.5088	-0.50843	1.258	-0.585127	-3.1126	-1.83365	0.958946	-2.03074	1.17267	-0.156231	0.711013	0.239514	0.115436	-2.99807	1.03129	-0.678234	0.553463	-0.359715	1.01601	-0.440795	0.674732	-1.92081	1.60767	0.138532	2.08044	-0.0220151	0.217115	-0.0681229	1.21756	1.11772	-2.01206	-0.78939	-1.27563	0.678261	-2.14835	-0.623983	0.679727	1.70574	-0.664142	0.444568	-2.34665	0.0737028	0.701843	1.32785
83	-0.0551085	4.94699	0.26204	3.9625	0.106095	1.78392	0.129857	2.79344	0.697367	1.38812	1.09673	1.5885	-0.0920429	-0.0268068	0.267331	0.656016	-0.0457973	1.78259	-0.403491	2.23034	-0.885387	-0.00041914	-0.16453	2.62498	0.536276	-0.72996	0.810683	2.25363	0.0722752	2.9439	0.16008	1.12795	0.968356	-0.516122	0.922984	-2.30654	-0.433095	-0.899663	2.05583	-0.582449	0.7693	0.885248	1.99495	1.6768	0.39504	-0.588541	0.746028	0.954881	1.66117
84	8.5254	4.37087	9.17421	7.60893	8.90656	7.82399	8.59552	7.90803	8.0304	7.45997	6.73502	3.37533	8.93237	6.74924	9.04713	7.64457	8.85306	8.59848	7.85079	7.69939	8.19668	5.32936	8.07639	7.35364	7.96851	5.97165	8.90747	6.20406	8.75131	6.76821	8.95427	7.59592	6.98098	6.91328	7.40442	7.83365	9.12469	8.49506	6.40252	8.74153	6.261	8.35524	6.22843	7.07523	6.82	7.4462	7.92943	8.36895	6.47403
85	1.35983	2.45133	1.32103	3.39725	1.60744	2.89714	1.41658	2.87896	1.45036	2.07184	1.60607	3.06732	1.16667	2.02034	0.678723	1.96802	1.23858	2.1076	1.60304	2.50386	1.38613	1.75323	1.47818	3.32729	1.76755	1.88489	1.8115	2.38716	1.57174	2.48676	1.14037	1.95392	2.36889	2.13908	2.20645	0.978411	1.33024	1.27702	3.39928	0.935472	2.03713	1.86174	3.07737	1.51779	2.03332	0.659146	0.945683	2.19395	2.97814
86	1.05162	3.02188	0.743412	2.2494	0.913124	2.23179	0.0777426	1.84446	1.13676	0.831907	1.04387	2.20291	0.410573	1.55778	0.215364	1.72594	0.683497	0.960672	0.855256	2.04691	0.893082	1.44038	0.649415	2.45009	0.853125	1.81452	1.04354	2.11756	1.40296	1.92399	0.29458	1.41164	2.19261	1.9756	0.976829	-0.116642	0.712028	0.351892	2.75508	0.300781	1.01273	1.35012	2.56827	0.882713	1.1191	-0.0560741	0.301656	1.08153	2.48856
87	-1.29543	1.10123	-2.30869	0.616735	-1.63706	0.232176	-1.40587	0.79388	-1.38056	-1.35711	-1.46109	-0.32832	-1.92279	-0.628457	-3.01916	-0.548966	-1.05432	-0.895939	-1.74613	-0.30919	-2.49736	-1.49342	-1.11523	0.141023	-0.996902	-0.112407	-1.08436	-0.50733	-1.16889	-0.148526	-1.37241	-1.07561	-0.581676	-0.728558	-0.522451	-1.84686	-1.25655	-1.38455	0.279174	-1.15942	-0.900143	-0.810141	0.00630093	-1.55975	-0.238265	-2.64412	-1.79028	-0.670642	0.023098
88	-2.03053	-0.597372	-3.30317	0.0449305	-3.84562	0.726737	0.0960369	0.0220346	-2.13209	-2.4617	-0.4217	0.689352	-3.20176	0.0395336	-1.8237	0.978841	-2.36062	-3.01189	-0.387113	1.05298	-3.14802	-0.977731	-2.96582	1.20819	-1.686	0.26911	-2.79838	1.02545	-2.67098	-0.183715	-2.61451	0.0834227	-0.214276	1.24212	-0.246883	-1.6314	-2.82656	-3.73342	-0.0345459	-2.31732	-0.535676	-3.21936	0.282043	-2.68163	0.365066	-2.89652	-2.09657	1.26244	0.183785
89	0.0413527	1.85317	0.360657	1.83653	0.0138545	2.04131	-0.0499277	1.88423	0.641881	1.01403	0.346938	1.73662	-0.457026	0.548818	-2.1549	1.13013	0.0197964	0.610132	1.35996	2.30404	-0.428054	1.08833	0.031642	2.21248	0.716443	0.921846	0.287959	1.51584	0.916868	1.82799	0.0614772	0.876381	1.96038	1.68602	1.45874	-0.106169	0.453064	0.377274	2.54369	-0.135134	1.09031	0.180868	2.28688	0.393491	0.576226	-0.0567207	0.359992	0.427886	2.18844
90	-2.71237	-0.414937	-1.52282	1.20685	-2.87153	-0.196812	-2.54493	0.333217	0.324052	1.2285	0.1187	1.02599	-3.20928	-0.451365	-3.91589	0.0761018	-1.93642	0.557523	-2.85219	-0.0949044	-1.74913	-2.23957	-3.47065	-0.829923	-2.6829	-0.680122	-3.33013	-0.539167	-2.01993	-0.158266	-2.88893	0.347877	-2.65615	-0.254065	1.41457	-2.26737	-2.65866	-3.16292	0.310515	-2.22254	0.0711126	0.641383	-2.34805	1.03447	0.284757	-2.16025	0.598337	0.0447383	0.371744
91	-2.62191	2.13452	-2.14404	1.55924	-2.06742	0.442838	-1.9501	0.907351	-3.30207	1.14252	-3.60917	1.77156	-3.18879	-1.94777	-1.79145	0.133529	-2.50683	-2.63431	-1.04702	0.427302	-2.2305	-3.48644	-2.51897	0.76161	-2.79763	0.622517	-1.94049	-2.47893	-1.94385	-1.14545	-2.44627	-2.45083	-0.590054	1.12359	1.16039	-1.2634	-2.85784	-3.00283	1.39081	-1.33996	0.463944	0.940068	0.591443	-2.9747	0.39605	-2.64976	-2.70519	0.604407	1.15664
92	-2.07651	-0.795353	-1.98431	-0.151614	-2.16731	-0.190449	-1.71902	-0.611023	-1.36873	-1.53015	-1.46632	-0.799023	-2.58331	-0.27241	-2.32776	0.038156	-2.64959	-0.503119	-1.28809	-1.13256	-0.830672	-1.14026	-1.86343	0.215523	-1.83166	-0.624452	-1.62516	-0.150634	-2.81728	-0.713208	-2.19342	-1.41828	-0.234179	0.275835	-1.54265	-1.9114	-2.73169	-1.95158	1.01437	-1.53696	-0.737294	-1.37468	0.333852	-2.40331	-0.966862	-2.05773	-2.32407	-1.11634	-0.453314
93	-0.472762	1.27143	-0.297865	0.916989	0.320508	0.857725	-0.473161	-0.348102	-0.227786	0.118193	-0.679761	1.31306	-0.626052	0.106156	-0.912659	1.69215	0.863111	1.98274	-0.591666	0.194663	-0.640182	1.4304	-0.821049	1.29743	-0.513795	0.854904	-0.575234	2.03218	-0.339982	0.418367	-0.700879	0.718433	0.530741	0.238115	-0.0283518	-0.598443	-0.644236	-0.775658	2.03934	-0.659048	1.06971	0.497128	2.19349	-0.218294	0.181961	-0.867475	0.385101	0.191418	-0.545269
94	1.24361	3.11347	1.43356	4.11557	0.830998	3.98513	1.92505	3.14485	1.4277	2.99028	1.59284	3.29037	1.40304	3.10905	0.941754	3.79903	2.14869	2.88285	2.20581	4.89787	1.17763	2.18511	2.20011	3.37823	2.01663	2.41556	1.74098	3.4795	1.049	3.01589	1.03958	1.92381	2.76204	1.04288	2.63583	0.971735	1.43254	0.959355	3.85834	1.39158	3.46438	4.0683	3.75817	2.83509	3.14094	0.898248	1.78473	3.49855	3.51563
95	8.45989	3.36323	7.70551	4.78931	8.05823	4.38507	6.25116	5.14059	8.20892	2.68612	4.15487	2.34776	6.03675	0.629882	7.45572	4.32298	7.52233	7.99307	7.39608	4.71722	6.46513	4.81352	6.60578	6.3889	6.95513	0.752584	5.74511	6.74006	8.87107	6.09335	8.62705	6.9768	6.41432	5.62788	3.43131	5.93868	8.84722	8.06827	6.04233	7.28287	4.82086	6.88856	5.41364	7.59522	4.72396	6.74888	6.74402	7.61883	5.71154
96	-2.41824	-0.936584	-1.38825	0.260625	-1.50836	0.710296	-1.82492	-0.437147	-1.43318	-1.06721	0.340832	1.42773	-3.23704	-0.309353	-2.63851	0.445071	-0.239241	-0.385833	-1.66431	0.183047	-1.93651	-0.258308	-1.15594	-0.0446792	-2.33855	0.121057	-1.26741	0.0149803	-1.53646	-0.176759	-3.3707	-1.39925	-0.877569	-1.52127	-0.354235	-2.06218	-2.16415	-3.11357	0.49788	-2.4057	0.328971	1.3462	0.204536	-1.71934	0.0775852	-2.76798	-2.17273	-1.0131	0.306079
97	0.000524998	1.08593	-0.0916038	1.75191	0.0759845	0.960037	-0.284553	1.63303	-0.0892372	0.246833	-0.275098	1.2309	-0.309239	0.993069	-0.853184	1.27563	-0.153105	0.121086	-0.532606	0.957952	-0.0577908	-0.520603	-0.237556	0.982022	0.0903006	2.08237	0.305154	0.993102	0.31269	1.50121	-0.456675	0.24577	0.381772	-0.411659	0.662036	-0.549926	0.23096	-0.603313	0.900678	-0.394209	0.283024	0.443695	1.21431	0.020752	0.306083	-0.465689	-0.112871	0.444371	1.01566
98	-0.492589	1.57685	-0.263955	1.57001	-0.410938	2.44819	-0.16563	0.965671	-0.608606	-0.0708885	-1.2306	3.17826	-0.763077	1.11959	-1.68304	1.14168	0.0542221	0.6196	0.0713563	2.29946	-0.49845	-0.100271	0.19716	1.94792	-1.13233	0.066638	-0.223946	0.562275	-0.904805	1.31924	-0.809274	-0.540258	0.0886497	-1.22103	0.232832	-1.08735	-0.567232	-0.649002	1.76058	-0.828292	0.504364	1.59777	1.56955	0.301281	0.847005	-1.34506	-0.141776	0.71039	0.663584
99	-1.22057	3.17954	-0.723925	1.96007	-0.630077	2.1564	0.110742	0.94689	-0.18041	2.05592	0.163118	2.04333	-0.501955	0.343227	-0.0932069	0.27105	-0.592371	0.579279	-1.07787	1.29133	-0.665088	-0.744607	-0.501414	0.913147	-0.441506	0.0802603	0.0976272	0.784402	-0.750325	0.600151	-0.578645	0.312112	-0.451879	-0.668683	0.811889	-2.26298	-0.55624	-0.686168	1.2788	-1.00334	0.508875	1.39028	1.17334	0.331032	0.462619	-0.730477	0.11619	0.888209	1.0252
100	-0.0600028	-2.8289	-0.732422	-2.45636	-0.230621	-2.56791	-1.21353	-2.34803	-0.406115	-2.72363	-1.80913	-1.19795	-0.417366	-1.42937	-0.154911	-2.5933	-0.289158	-0.475091	-2.91914	-1.87906	0.177812	-2.57135	-1.31575	-2.31199	-0.140501	-2.11018	-0.990709	-1.63447	-0.332504	-0.895686	-0.458473	-0.735861	-2.83705	-1.60261	-2.77559	-1.16775	-0.304821	-1.37264	-2.29664	-0.609421	-2.10328	-0.737324	-2.77939	-0.384296	-3.02069	-0.389189	-0.655122	-0.334597	-2.65145
101	-1.23745	0.910021	-3.29392	0.248696	-1.27535	0.212937	-1.40641	-0.0740662	-1.09738	-0.248266	-1.04658	0.396701	-1.55377	-0.936275	-2.111	-2.04302	-1.56742	-1.0361	-1.42535	-0.310952	-1.13883	-1.51698	-2.18041	0.195629	-1.08293	-1.11464	-1.09944	-0.531159	-1.69667	-0.189081	-0.954276	-1.07574	-0.80047	-1.11071	-0.618684	-2.45281	-2.62371	-1.56732	0.100246	-2.62632	-0.73543	-0.728634	-0.12664	-1.37796	-0.970586	-2.25775	-0.747115	-1.0524	-0.119567
102	-0.670254	1.90087	-0.703597	1.29361	-0.280336	0.936783	-2.1581	0.989639	-0.251699	0.565331	-0.284271	1.39951	-3.14628	-0.340904	-0.382853	-0.40003	-0.793229	-0.130712	-3.13887	0.578567	-0.78806	-1.33491	-0.605271	0.86668	-0.332311	-0.955785	0.174989	0.504605	-0.346254	0.774748	-0.81504	-0.389114	-0.0649862	-0.860914	0.452934	-2.58192	-0.73954	-2.63503	0.996888	-2.68036	0.0430183	0.0963964	0.858105	-0.209491	0.341168	-1.93328	-0.703899	0.0757556	1.03517
103	2.04721	-0.165919	2.00065	0.6356	1.78936	0.387314	1.08603	0.339282	1.61118	-0.038353	1.09452	-0.00451088	1.4627	0.228662	1.452	0.741803	1.34572	1.27054	1.49756	1.05549	1.79932	-0.147018	1.25808	0.853291	1.86226	0.757718	1.64633	0.753383	1.59866	1.24218	1.39337	1.63866	0.347541	0.815866	0.148253	0.974411	1.53473	1.42748	0.457333	1.11369	0.105925	1.22384	0.0881557	0.957297	0.191058	1.13388	1.00767	1.55445	0.550008
104	0.696765	-3.32025	1.89857	-0.294256	0.782095	0.319786	2.1018	0.652005	1.16223	-2.63101	0.219328	0.185236	1.06783	-1.55142	1.09526	-0.212801	1.09714	0.369465	1.98241	-2.1334	1.29567	-3.47876	3.24121	1.00155	1.5359	-1.39729	1.90091	-1.68671	0.606727	0.670239	1.90004	2.23657	-0.571849	0.659946	-0.941378	2.16498	1.02844	2.69199	-2.26214	2.12574	0.155267	0.547907	-0.842379	0.113167	0.595121	0.553217	0.873519	0.130368	-1.84871
105	3.5555	0.0519495	3.52999	2.06046	3.30391	1.09782	2.16314	2.10523	2.81199	1.24601	2.76972	0.169265	2.60446	0.861251	2.32609	1.52692	2.66691	2.6728	2.59088	2.19323	2.93604	0.92138	2.56075	2.24155	3.29822	0.639187	3.10472	1.63599	2.87088	2.68266	2.60873	3.35646	1.36662	1.94583	1.54763	2.19871	3.16057	2.69685	1.21752	2.31145	0.588706	2.4215	0.841427	2.23869	1.32331	2.56347	2.39491	2.8148	1.2902
106	1.82182	-1.51725	2.24508	0.750799	2.42864	0.269123	1.6117	1.19531	1.7836	0.489077	1.02328	-0.555873	1.93077	-0.157093	1.24356	0.688862	2.47905	1.47933	1.55416	1.23532	2.51024	-0.82198	1.80301	1.27748	2.86954	0.344403	2.45795	0.782167	2.09226	1.54169	2.06549	2.122	1.00342	0.99105	1.03241	2.04331	2.42125	2.30316	0.172883	1.89408	1.26692	1.81979	0.12907	0.853656	0.846835	1.37106	1.75427	1.68118	-0.954316
107	1.52436	-0.410881	1.2484	-0.244369	1.49518	-0.0379734	0.912503	0.326745	1.23454	0.0619478	0.613645	-0.945612	1.03832	-0.696746	0.93348	-0.185607	0.974078	0.573131	1.89863	1.0118	0.822564	-0.461577	1.74795	0.821002	0.75293	-0.282423	1.13851	-0.310378	1.10667	1.23718	1.41425	1.25945	0.531964	0.36169	0.449286	0.947834	1.28209	1.63407	-0.778515	0.907026	0.0921955	0.695017	-0.496507	0.613898	0.553366	0.501545	0.557054	0.558173	-0.656934
108	-0.345962	2.71838	-0.227943	1.86566	-2.32965	2.37017	-0.0848112	-0.0412989	0.00097847	-0.082303	0.201357	0.545509	-1.62834	0.916396	-2.28473	0.731198	-0.304808	0.137019	-0.200101	2.03473	-0.282736	0.102238	-0.150698	1.22408	1.70881	0.520716	-0.0500464	2.68037	-0.468111	0.0392065	-2.8371	0.129814	3.91777	-0.926592	0.492085	0.767036	-0.559919	-2.02954	1.81644	-0.561028	0.466801	0.855896	2.42133	0.496234	0.694234	-2.59896	-0.408945	0.285715	3.54937
109	4.06527	-3.99853	4.20695	2.61569	3.72561	1.40866	2.83129	2.28181	3.19368	1.83409	2.74107	1.60119	3.28816	1.70263	2.9741	2.19444	3.45119	2.90742	2.79976	2.45656	3.33257	1.56337	2.96396	2.57421	3.42633	0.129736	3.96985	0.476029	3.64833	3.01032	3.12492	3.27014	1.46225	2.38043	2.13538	2.43023	3.47214	3.19851	1.86206	2.94364	1.86138	2.97652	-0.407462	2.85687	2.00434	2.80137	2.74797	2.44394	0.897111
110	-2.51901	-0.960339	-3.26464	-0.827493	-1.41743	-0.594106	-2.13206	-2.41067	-2.4285	-2.32175	-2.49958	-0.367491	-2.50657	-0.0311651	-2.1351	-1.05376	-3.28688	-1.19198	-2.35633	-0.704222	-2.52525	-3.15265	-0.921475	-0.814153	-2.5971	-0.615925	-3.40052	-0.759912	-2.29311	-1.4989	-2.59417	-1.40219	-0.367534	-0.0846157	-3.37752	-3.03399	-1.94313	-3.21868	0.194618	-2.0781	-0.184266	-2.39534	-0.485772	-3.37518	-1.57699	-2.51396	-0.588036	-1.52266	-0.763712
111	2.96852	5.52592	2.38783	4.49201	3.0351	4.24021	2.48172	3.50587	1.49964	2.29983	2.22946	4.75282	1.85507	3.15804	1.85662	2.51837	2.30442	3.37123	2.52761	3.19205	2.05606	2.93041	2.30495	3.13791	3.07635	3.42322	3.06319	4.35537	2.68303	3.3682	1.92609	2.94354	4.47747	3.59344	2.7437	2.08586	1.86804	2.15961	4.52324	1.87907	4.4484	2.79166	4.93725	3.04187	3.411	1.89931	2.48309	3.04194	4.68406
112	-0.441235	2.31606	-0.292363	2.32571	-0.123987	1.15881	-0.131384	2.03468	-0.133087	1.22265	0.405964	1.78835	-0.361325	0.459721	-0.314055	0.11658	-0.218783	0.621442	-0.548697	1.24924	-0.463469	0.281919	-0.388175	1.57882	-0.133415	-0.322568	0.288546	0.823987	0.305612	1.80979	-0.728236	0.246914	0.513201	1.41031	0.87458	-0.944977	-0.281491	-0.668982	1.59697	-0.490514	0.252284	0.360834	1.15327	0.662667	0.455934	-1.00013	-0.252888	0.557734	1.20393
113	1.4692	3.06539	1.05578	2.91846	1.27013	3.48209	0.936735	2.30079	1.29271	1.20882	1.08363	2.63353	0.768867	2.01025	1.10391	1.90213	0.998446	1.44934	1.19988	2.52284	1.37464	1.54267	1.38103	2.67855	1.24072	2.0558	1.26658	2.89381	1.46019	2.90527	0.770647	1.74074	2.03071	3.33253	2.07545	0.84621	1.23408	0.874574	2.87641	0.928261	1.67222	2.16925	2.84394	0.998881	2.04877	0.433994	1.15364	2.1233	2.93309
114	-0.931143	2.07238	-1.7187	0.22207	-1.09739	0.468818	-1.28776	0.606868	-0.676232	0.682483	0.133107	1.19945	-0.977829	-0.317702	-1.42945	-0.893961	-1.43553	-0.138946	-1.83912	0.251537	-0.803439	-0.0125241	-1.0134	0.501447	-0.599078	-0.365717	-0.539347	0.16768	0.568301	0.173081	-1.64352	-0.421011	-0.786366	-0.914201	-0.0740509	-1.55821	-1.13954	-1.40427	0.671487	-1.49276	-0.338185	-0.588504	0.511223	-0.0863657	-0.280377	-1.29461	-0.66733	-0.212751	0.402129
115	-1.2252	0.173725	-0.976029	0.616491	-0.987634	0.0981941	-1.52782	0.203633	-0.975976	-0.472058	-0.433716	1.07324	-1.9379	0.049778	-1.57956	-0.528394	-1.09585	-0.316905	-1.02141	0.220183	-1.28107	-0.544493	-1.20163	0.00307131	-1.07753	-0.579661	-0.719052	-0.212208	-0.737648	0.188609	-1.40947	-0.853703	-0.562453	-1.06286	-0.570475	-1.54158	-1.09905	-1.00646	-0.0232592	-2.78541	-0.562514	-0.847276	-0.170596	-0.797738	-0.607606	-1.98662	-1.24483	-0.712509	0.0402555
116	0.999913	-3.32383	0.63837	0.0888081	1.65679	-0.421363	0.68838	0.459722	0.474542	-0.543821	0.791025	-1.31227	0.95819	-0.523708	0.338977	-3.34446	1.02425	0.716655	0.391312	-0.656105	1.71315	0.169765	0.794812	-0.329179	1.50997	-0.908837	1.20012	-0.323399	1.29868	1.1923	0.76335	1.72842	-1.04366	0.271893	-2.29393	0.737385	1.12498	0.835141	-0.967202	0.723041	-0.735001	1.01087	-0.341186	0.679948	-0.577106	0.559961	0.826704	1.06126	-1.48477
117	-0.559986	0.444285	-0.559624	2.1845	-3.22992	1.78896	-0.22252	1.20967	-0.0994425	-0.0181837	-0.566805	2.40299	-0.541656	0.974092	-0.739175	0.0813508	-0.536608	0.159893	-0.514222	1.05937	-0.814024	-0.503232	-0.428593	1.1751	0.218232	0.136549	0.529561	0.865046	-2.96222	0.52098	-0.941472	0.18001	0.104832	-0.385586	0.671144	-1.13344	0.101738	-0.573168	1.88873	-0.733663	0.648467	0.649207	1.58548	-0.170316	0.712544	-1.28045	-0.471273	0.759193	1.89528
118	0.279945	-2.59196	0.202007	-1.14691	0.0462852	-2.69679	-0.598956	-1.30494	-0.864267	-2.6721	-0.424545	-2.16883	-0.169244	-0.255743	-0.505138	-0.89615	-0.461093	-1.30877	-0.563143	-1.52847	0.119866	-4.1887	0.0319901	-1.62805	0.253098	-1.02853	0.0435004	-2.95352	-0.749031	-0.907866	-0.748663	-0.530322	-2.03829	-2.41501	-2.91232	-0.741521	-0.475964	-0.676121	-2.55025	-2.17916	-2.56115	-1.1331	-1.4204	-1.13646	-3.12216	0.0449991	-0.409787	-1.03593	-1.92772
119	1.06332	1.3541	0.345169	2.26941	0.450213	1.96537	0.126933	1.7006	0.275599	1.88415	3.30028	2.36531	1.26274	2.81943	0.391688	3.2903	1.30357	2.36878	0.136489	1.86243	1.00053	3.80412	0.199529	2.35632	0.0190296	2.09623	0.46614	1.77329	1.0292	2.05781	0.153895	1.46158	0.821601	1.30195	2.23047	0.30629	0.201505	-0.093955	2.98287	0.364111	2.25265	1.0443	2.16264	2.9616	1.39618	0.668129	1.07032	1.1909	1.63595
120	0.0891166	3.51972	0.033401	2.07516	-0.17484	2.50539	-0.0170965	1.04278	0.641726	0.481629	0.00987244	2.49199	-0.540133	1.56346	-0.659003	1.4764	0.20117	0.693213	1.33618	1.54508	-0.204034	-0.0131364	0.594616	1.87519	0.0379934	1.78752	0.227865	1.88075	0.479787	1.12504	0.00383234	0.930106	1.06111	1.89872	1.27142	-0.195902	0.356143	-0.139296	2.50639	0.555067	1.07248	1.16906	2.09034	0.820913	1.2306	-0.731712	-0.257133	0.777793	2.11047
121	-2.82357	-0.612537	-2.72166	-0.432431	-2.37695	-1.85523	-2.93686	-0.41981	-2.51022	-0.891238	-2.34068	-1.59091	-2.69223	-2.65603	-2.30481	-2.48575	-2.34972	-2.7001	-2.07546	-0.840745	-2.18925	-2.89324	-2.8177	-0.929188	-1.75748	-2.1541	-2.21767	-1.66406	-2.05785	-0.120763	-2.65322	-1.78188	-1.23722	-2.46881	-1.4899	-2.10213	-3.19705	-3.21839	-1.12092	-3.71401	-1.21466	-2.55439	-0.906207	-2.87403	-1.05589	-2.89143	-1.56062	-1.13915	-0.988115
122	-0.555475	-0.126886	-1.10996	0.25403	-0.624047	0.426705	-1.02894	0.114977	-0.279218	0.0836506	-0.614481	0.596106	-0.887369	-0.232403	-1.0757	-0.122102	-0.19152	-0.16066	-0.819535	-0.158267	-0.410555	1.88652	-0.565	0.425189	-0.378736	-0.0370855	-0.289231	0.816003	-1.17338	-0.118107	-0.889044	-0.156041	0.921173	-0.701498	0.12237	-0.698824	-1.05828	-0.667444	0.153634	-0.785815	1.37103	-0.191295	0.275285	-0.296575	-0.118571	-2.14753	-0.347707	-0.248967	0.407184
123	0.437809	1.70286	0.472921	1.92432	0.467772	1.95764	0.202297	0.885907	0.0496998	0.253225	-0.167764	1.22911	0.385198	1.10516	0.0880027	1.37303	0.683534	1.48199	-0.241155	1.26982	-0.0931215	1.33275	0.17522	1.07708	0.323689	1.03672	0.718253	1.80342	0.810471	1.51425	0.218357	0.770206	1.02094	1.1859	0.910456	0.216041	0.626097	0.320122	3.11035	0.474325	1.87378	1.17769	1.72389	0.907163	1.14377	0.122388	1.0499	1.03754	0.711176
124	0.945436	-2.74182	1.91514	-0.140606	0.645812	-0.761574	1.77543	1.1466	2.30045	0.715446	1.95824	-2.77381	0.578598	-1.69163	-0.033011	0.709753	0.952407	-3.18962	4.28152	2.1658	0.862214	-2.44287	3.60134	0.172753	0.120312	-0.477297	2.15332	-2.37052	1.21885	1.69279	3.5871	2.32136	0.101955	0.413802	0.866656	3.99001	0.930953	3.4515	-1.32485	1.16064	0.216382	1.06248	-2.03996	0.0450611	0.30221	0.0188446	0.0955496	0.110731	-0.388256
125	-1.59168	0.103622	-3.426	-0.188226	-1.36411	-0.238267	-1.04578	-0.811813	-1.50584	-1.16256	-3.02532	-0.333645	-2.80755	-0.500224	-2.59891	-0.73137	-1.1381	-1.51903	-1.63665	-0.345394	-1.12172	-1.52676	-1.43438	-0.302637	-1.22632	-0.823309	-1.39989	-0.960957	-1.4567	-0.760038	-2.2657	-1.38948	-1.34801	-1.65802	-0.505136	-3.04165	-1.12541	-1.321	-0.331017	-1.52894	-0.635559	-0.48264	0.107096	-2.80076	-0.397202	-2.20211	-1.15852	-0.851397	0.0333853
126	0.986526	-4.10388	1.02491	-0.828858	1.2136	-1.19662	-0.0991545	-0.964023	0.841934	-2.01128	0.338611	-2.55357	0.619877	-0.43386	0.254381	-0.17061	0.680985	0.265624	0.98724	0.38324	1.08056	-2.46773	0.572675	-0.0304475	0.7718	-0.31539	0.464984	0.292181	0.942028	0.306922	0.844429	0.98896	0.0765743	-0.445406	-0.534551	0.0635204	1.04712	0.732808	-0.685019	0.705094	-1.13318	0.287894	-1.11651	0.0669279	-0.583774	0.442286	0.353527	0.447918	-0.285047
127	2.20369	-0.908639	1.90607	0.911716	2.21318	0.52761	1.8355	1.22033	1.83696	0.976602	1.33124	-0.520902	2.12099	-0.150138	1.68503	0.405371	2.0531	1.29073	0.133871	-0.143236	2.54154	-0.0633016	2.47907	2.1917	2.40403	0.546245	2.16175	0.220204	2.49746	1.36043	2.18329	2.20972	0.91339	0.948201	1.31782	1.73131	2.3767	2.36874	0.572418	1.81191	0.832491	1.63935	0.412678	0.999049	0.738786	1.3078	1.04215	1.28166	0.15044
128	5.89432	-1.44272	6.24002	4.68268	6.40534	4.6224	5.02123	4.87461	5.78428	4.40008	4.39787	0.707156	5.66642	-0.154626	5.09037	2.34525	5.75469	5.75815	6.31494	6.78447	5.86221	1.66256	5.95486	5.78751	5.65854	1.86493	5.91493	3.69749	6.04112	5.82088	5.03725	5.00488	3.3161	4.18974	4.25736	4.94994	6.14093	5.43084	3.46744	5.55282	3.8065	5.62628	3.15871	5.22404	5.60232	4.94179	4.87772	6.12307	1.94108
129	2.42608	0.146479	2.73019	1.39315	2.77264	0.657442	1.71301	1.11048	2.94999	0.556993	2.04931	-0.178278	2.16684	1.06361	0.999514	2.28982	2.52698	2.1818	2.56866	2.2668	2.23671	0.141616	2.12909	1.98184	2.31408	0.387543	2.50571	0.634743	2.39659	1.68141	2.16405	2.3516	0.593521	1.42099	1.11198	1.59107	2.52271	2.16031	1.5552	2.10121	1.01532	2.09054	0.447059	1.76434	1.12759	1.68073	1.64425	1.82179	-0.216887
130	0.0919681	0.473124	0.0917945	1.77862	0.886161	3.72268	-0.0533476	0.648092	-0.784266	-0.207376	-0.889087	0.586054	0.240284	1.25989	-0.255536	1.01025	0.441047	0.677011	-2.73834	1.39869	0.756668	-0.792634	-0.238705	1.41717	-0.343474	2.99242	0.263113	3.70057	-0.106462	0.117075	0.0654283	1.39817	3.45411	-1.04012	0.941615	-0.890096	-0.303243	-0.505074	0.865925	0.18638	1.98731	1.79829	4.28939	0.260884	0.185269	-0.119981	0.982361	0.965976	2.84194
131	0.978044	4.18885	2.14917	4.95446	1.32491	5.30361	0.609953	2.95183	1.08793	0.88502	0.892261	3.29484	0.210787	1.87047	0.200371	2.42924	0.891219	1.87161	1.10602	3.85648	1.26954	2.70921	1.1955	3.53059	1.66247	1.78151	0.784079	4.12081	1.37163	4.6493	1.47119	2.76714	1.80134	4.65926	3.74776	1.37321	0.403476	0.181352	2.57403	0.66334	1.25006	2.54888	3.6353	0.27157	2.01295	-0.213652	1.321	3.63084	3.17072
132	3.01208	3.88165	2.8903	4.52084	2.97612	4.26589	2.71999	4.04551	3.16539	3.32095	3.15773	4.17368	2.63714	3.71528	2.33395	3.70848	2.91844	3.31517	3.69262	4.13971	2.70839	3.02799	3.47844	4.37749	2.991	3.66765	3.41222	4.25185	3.25464	4.07402	2.66697	3.47617	4.33922	3.04222	3.51268	2.80663	2.73378	3.07773	3.97767	2.69659	3.57863	3.31955	4.08282	3.09691	3.75531	2.05153	2.6699	3.20912	4.51307
133	2.57521	1.76635	3.9305	2.01631	4.04819	0.918623	3.46932	3.53224	2.52255	1.65231	1.91623	0.573973	3.57821	2.4425	3.76318	0.612731	3.05909	3.27302	2.75653	1.66165	3.30015	1.26922	3.08872	3.0387	2.70549	-0.563127	4.3319	1.47728	3.15087	1.67172	3.11301	3.39071	0.475992	1.54009	0.897628	2.49428	3.9206	2.69759	1.55107	3.67724	1.3013	2.27797	2.11589	2.19466	0.811506	2.52649	2.90087	3.26823	0.114886
134	-2.56147	0.758984	-3.09227	1.39579	-0.477055	0.766353	-2.48293	1.16468	-0.536757	0.361352	-0.289458	0.932497	-1.68859	-0.558992	-0.774327	-0.0424581	-0.7314	-0.0328398	-3.0539	0.416923	0.103615	-0.504094	0.0266542	0.485053	-0.447365	-0.728483	-0.451645	0.321857	-0.562403	0.8716	-2.47998	-0.428575	-0.143329	-0.152753	0.472384	-1.98413	-0.3826	-0.967491	0.895549	-2.30914	0.143002	0.171887	0.657163	-0.268883	0.130404	-0.3201	-0.538642	0.283207	0.851322
135	0.730526	3.9298	0.485764	3.01861	0.794131	2.54381	0.831177	2.19952	0.960265	2.28769	1.23106	3.27002	0.156157	1.25535	0.765997	0.786913	0.410074	1.46956	-0.233838	2.19655	0.661214	-0.410958	0.441406	2.16329	0.925307	0.778152	1.05394	1.58958	0.649426	2.30802	0.375224	1.57496	0.81045	0.133006	1.90526	0.616205	0.830897	-0.142985	2.06868	0.350281	1.66427	1.57426	2.08126	1.44393	1.90363	-0.112163	0.601299	1.64464	2.45124
136	-0.325339	0.517805	-0.212818	1.32338	-0.263708	0.63578	-2.37639	0.234257	0.0466433	0.577304	0.344007	1.93914	-0.404959	0.949784	-0.718586	0.47013	0.0861664	0.284556	-0.383684	0.249886	0.0312586	0.914275	-0.511253	0.263248	-0.0518637	0.489189	1.36577	0.985614	0.239252	0.718474	-0.359855	0.556772	0.615711	-0.175925	1.20286	-0.504974	-0.0524712	-0.643669	0.831956	-0.0508518	1.33753	0.235459	1.68962	0.166635	1.80127	-0.640433	-0.320139	-0.0651307	0.821265
137	-0.293683	-1.68708	-0.889293	0.144023	-0.787326	0.224932	-2.97037	-0.19001	-0.492122	-0.436684	-0.394999	0.598955	-0.521626	0.15347	-2.97338	0.359656	-0.694638	-0.168792	-0.833311	-0.150941	-0.890951	-0.211604	-0.976426	-0.279458	-0.230136	0.976029	-0.574699	1.13978	-0.48784	0.145446	-2.59783	-0.389216	1.31334	-0.647725	0.0929203	-3.48028	-0.92391	-0.542356	1.20546	-0.725684	-0.107932	-0.608486	0.907562	-0.547539	-0.00691795	-1.9561	-0.374565	-0.375374	1.7001
138	1.08511	3.63896	1.33614	3.83119	0.867477	1.72973	1.15909	2.02519	1.06052	1.67027	2.48238	3.05979	0.954031	3.75743	1.18561	4.30655	1.42794	2.09035	1.04205	1.9683	0.769592	1.75245	0.929283	1.71207	0.51953	2.77201	1.68101	2.79853	1.60073	1.68354	2.01197	2.1295	4.68652	1.27193	3.08649	1.09333	1.05635	1.19646	4.24763	1.48838	2.72253	2.20465	3.87565	2.85775	2.40142	0.771621	1.08196	1.08447	4.05111
139	-0.229994	1.539	-0.547299	0.72737	-0.420461	0.529115	-0.680838	-0.174356	-0.309554	-0.498958	-0.260781	1.04478	-0.871465	0.929543	-0.896163	0.921129	-0.192719	0.0782566	-0.386293	0.511412	-0.476301	0.332468	-0.208941	0.69794	-0.572896	0.950332	-0.302321	1.2359	0.0853786	0.0259409	-0.94833	-0.00604534	0.891452	1.01103	-0.13767	-0.59656	-0.390774	-0.570745	1.99116	-0.334058	0.264186	-0.0317812	1.0339	-0.35475	0.712648	-0.216592	-0.118356	-0.00539446	1.18101
140	2.18839	-0.152787	1.6754	0.444876	1.87735	0.255095	1.03503	0.267885	2.14802	0.367976	1.28484	-0.0256739	1.24328	-0.162618	1.32599	0.442684	1.55979	1.24555	2.07539	1.29501	1.79583	-0.120212	1.61838	1.24891	1.64221	0.557882	1.57433	0.889285	1.89419	1.38326	1.426	1.68925	1.2958	1.36668	0.519366	1.00641	1.35721	1.56691	1.21732	1.42554	0.214387	1.26391	0.439646	1.35112	0.99439	1.42433	1.1176	1.17159	0.496642
141	0.946754	5.98566	1.24195	4.15326	1.34604	3.25556	1.47498	3.69731	1.91036	3.64438	2.29221	3.81281	1.12187	1.96361	1.71167	2.12294	1.33972	1.98737	1.0863	2.93143	1.97841	1.00078	1.37916	3.59312	2.03372	1.0521	1.68408	2.77765	1.80721	3.15755	1.40374	1.96361	1.77929	1.07847	3.10129	0.460721	1.24011	1.17307	3.08591	0.800638	1.96749	2.63274	3.1502	2.31227	2.63734	0.696551	1.80849	3.19778	4.34526
142	5.25188	0.493433	4.64341	3.86571	4.8297	3.02593	4.65342	4.36918	4.57386	3.9548	4.05488	-0.0631275	4.41218	2.30239	4.6398	4.94808	4.65754	4.40941	4.37593	4.21314	4.42572	2.0792	5.08532	4.80707	4.1243	1.70272	5.53345	1.27883	5.12479	4.26498	4.94801	4.73713	2.55706	3.71268	3.49099	4.29572	4.95739	5.01913	1.43819	4.66755	3.49543	4.97902	1.33085	4.14663	4.00125	3.33918	4.00905	4.71571	0.849763
143	-1.98092	0.51177	-1.52765	0.0780106	-2.98272	1.19581	-2.15364	-0.196088	-2.55187	-2.72884	-2.55057	-0.251991	-2.13417	-0.539717	-3.38148	-0.463045	-2.56233	-2.37479	-1.8579	-0.415748	-1.06429	0.132629	-2.46922	-0.287896	-1.14158	-0.365385	-2.49352	0.375416	-2.86085	1.20546	-1.13752	-1.03794	-1.05133	0.356365	-0.192132	-2.44485	-2.34803	-2.47996	-0.307906	-1.877	-0.828627	-0.864158	0.00458908	-1.83948	-2.45239	-2.75202	-2.48293	0.151344	-0.0389709
144	-1.20712	0.565181	-1.67023	0.759322	-1.42711	0.326262	-3.49143	0.290231	-1.10463	-0.737879	-0.913898	1.56225	-2.52952	-0.379939	-1.31926	-1.23346	-1.0393	-0.952147	-3.33831	0.598957	-1.44517	-3.2067	-1.23889	-0.383844	-1.02315	-1.38495	-1.11273	-0.723097	-1.53717	0.772248	-1.67876	-1.22661	-0.654737	-1.73295	-0.0872564	-2.19068	-1.44029	-2.40781	0.147239	-1.56875	-0.0846262	0.0673733	0.399679	-0.861229	-0.233138	-3.0412	-1.05904	-0.488694	0.193419
145	-1.53793	0.448218	-1.90725	0.335855	-1.75019	-0.404081	-1.93113	-0.0214052	-1.4429	-0.96688	-1.58589	0.311832	-2.30714	-1.29504	-2.21014	-1.91586	-1.52152	-1.36311	-1.14536	-0.220088	-1.82334	-1.49863	-1.25028	-0.267128	-1.28623	-1.92617	-1.61459	-0.911014	-1.75236	0.0553455	-2.82126	-1.03622	-1.0551	-1.79757	-0.691119	-2.74013	-1.58268	-1.78634	-0.0502539	-1.74936	-1.05274	-0.829333	-0.0964527	-1.49132	-0.803725	-2.66808	-2.32105	-0.953689	-0.0873423
146	-1.30948	-0.174988	-1.70929	1.49949	-1.86139	0.896011	-1.68703	1.17983	-1.99706	-1.04688	-1.45994	-1.34641	-1.08743	-0.96942	-2.31474	-1.50117	-2.50029	-1.86056	-1.68034	0.162171	-2.33777	-0.984492	-1.29829	0.703494	-1.72665	-2.64584	-1.79335	1.18958	-1.57212	1.63429	-1.63775	0.305244	-1.21352	-0.36717	-0.285092	-2.74238	-2.72746	-2.41702	-0.0765839	-1.99623	-1.0506	-1.66938	1.07283	-1.30039	-1.23926	-1.98414	-2.5802	-0.540394	0.043788
147	6.0409	4.64731	6.28096	5.08463	6.385	4.87156	6.04652	5.51423	5.84635	4.94491	6.38093	4.28003	6.01266	5.31062	4.92512	4.6808	5.66399	5.61693	6.22193	6.18861	5.99962	6.33104	6.23173	4.85444	6.10174	4.41739	6.17827	4.42483	6.31814	5.71814	5.67589	5.59808	4.3075	5.84343	5.46899	5.80715	5.86279	5.97439	4.58945	5.48865	4.33002	5.31249	4.87832	6.08593	5.09199	5.17457	5.16321	5.40595	3.71986
148	0.195439	2.14189	-0.679482	2.22548	-0.0817132	2.89593	-0.631095	1.12283	0.000579834	-0.30191	-0.00204182	2.42742	-3.46289	0.768584	-1.06977	1.67497	-0.0182724	0.781788	-0.770883	1.48638	-0.418232	0.519037	-0.586431	1.90858	-0.227639	-0.357135	-0.340466	1.9759	0.545519	1.84194	-0.667766	0.417513	-0.0895815	-0.0234041	1.23965	-0.968195	-0.298979	-0.335329	1.88786	-0.654307	0.419998	1.01984	1.50374	0.226333	0.844049	-0.870965	-3.24733	0.866045	1.45174
149	0.073338	2.48952	-0.151941	2.04092	0.126713	1.66641	-0.0831547	1.46421	0.0490389	0.877261	0.185334	1.87291	-0.178823	0.386645	0.0391755	-0.252198	-0.245005	0.359747	-0.288025	0.93571	-0.0995798	-0.155346	-0.394482	1.08573	0.238771	-0.0679436	0.282254	0.941998	0.241621	1.71788	-0.172319	0.537346	0.280505	-0.454577	0.858738	-0.701148	0.205925	-0.269343	1.0247	-0.337555	0.484097	0.495286	1.35713	0.322758	0.876144	-0.347202	-0.0326147	0.720228	1.52142
150	-1.81072	-0.567367	-1.88367	-0.231957	-2.35903	-0.889142	-1.9462	-0.319929	-2.68509	-0.943702	-1.78444	-0.451676	-2.55274	-1.34582	-2.41443	-1.55168	-1.7555	-1.39699	-1.92822	-0.785295	-1.62175	-2.09679	-1.9812	-0.788599	-1.43653	-1.1926	-1.46927	-0.901978	-2.14369	-0.493085	-2.8271	-1.40793	-1.36075	-1.7474	-0.818914	-2.33629	-1.52999	-1.83072	-0.93047	-2.63529	-1.28417	-1.40307	-0.69794	-1.65887	-0.817967	-1.20497	-1.78881	-1.02955	-0.520045
151	-1.71286	-0.980987	-1.41572	0.22998	-1.3733	0.235849	-1.56092	-1.05193	-1.59178	-0.776613	-1.40541	-0.207303	-1.38813	-0.1043	-1.33524	-0.56334	-0.352768	-1.17625	-1.60552	-0.895916	-1.76198	0.931575	-1.3715	-0.276194	-1.71363	-0.347716	-1.43217	-0.111368	-1.41579	-1.02247	-1.63113	-0.958549	-0.603091	-0.527435	-1.23874	-1.79469	-1.47479	-1.68351	0.706394	-1.92421	-0.264423	-1.06135	-0.480374	-1.28066	-0.786572	-1.96181	-1.72852	-0.875178	0.122878
152	-1.26471	1.67867	-1.2721	-0.124244	-0.676157	1.49092	-0.975329	-0.011117	-0.563404	0.360933	-0.559493	1.54965	-0.879799	-0.315536	-2.66869	0.00158644	-0.790069	0.536352	-1.47663	0.626615	-1.23028	-0.684559	-0.66263	1.88566	-0.81859	-0.607172	-0.761468	0.877517	-0.505091	1.03864	-1.13357	-0.59245	-0.104561	-0.866298	0.099226	-0.656039	-0.101423	-1.47367	2.02701	-1.53688	0.349188	1.02727	1.01399	0.483619	0.111341	-1.27478	-0.798925	0.746647	0.717464
153	0.144643	1.01254	-0.0431037	1.55958	0.114019	1.8234	0.0573025	0.709793	0.0861273	-0.0151501	0.0197887	1.02648	-0.368652	0.681441	0.163005	1.13766	-0.291573	0.39273	0.238117	1.26803	-0.313724	-0.230958	0.431279	1.41146	-0.0529594	1.56038	-0.0809541	2.00849	0.33532	1.85896	-0.275477	0.317024	1.87133	1.17641	0.466038	-0.279254	-0.120777	0.096612	1.68859	-0.225288	0.596801	0.647527	1.91562	-0.00692558	1.14471	-2.96377	0.161	0.813351	2.12457
154	3.03875	4.27281	2.93514	4.94365	3.16979	4.7345	2.80432	4.29288	2.65261	3.25977	2.64204	4.7873	2.77007	3.48101	2.52396	3.14485	2.81279	3.59658	2.77628	4.57697	2.48307	2.99019	2.96566	4.5289	2.85486	3.03112	3.48356	4.44977	3.9859	4.67536	2.54686	3.4122	3.41157	3.49695	3.97763	2.13455	3.04496	2.71569	4.67103	2.5917	3.20991	3.94842	4.31291	3.26684	3.73439	2.40287	2.88087	3.99238	4.39291
155	-0.0557971	-2.20301	-0.369492	-1.82606	-0.130181	-1.3644	-1.09554	-2.07237	-0.286021	-1.40396	-0.644807	-2.71333	-0.2006	-1.8578	-0.898306	-1.50219	-0.542226	-1.79597	-0.184111	-0.63082	0.0977268	-2.2774	-0.129574	-0.903389	0.39691	-0.914661	-0.308858	-1.17254	1.95477	-1.15848	-1.24397	-0.506128	-1.76738	-1.23972	-1.47248	-0.509242	-0.543527	-0.288481	-1.21062	-0.489552	-1.04677	-0.55834	-1.83071	-1.63945	-1.25552	-1.04454	-1.80383	-0.715994	-0.89957
156	-3.15579	1.67417	0.604324	1.89975	-0.614666	1.77887	-0.367942	1.38393	-0.142385	1.18403	0.357339	2.60206	-3.10274	0.313568	-0.525762	0.355238	-0.354256	0.210198	-2.5845	1.66143	-2.4366	0.0976071	0.0706244	1.67655	0.0768642	-2.58648	0.323628	1.05912	0.2963	1.06316	-1.4819	0.760692	0.930541	2.32027	1.20271	-0.381254	0.158427	-0.123963	2.51649	-0.662285	0.674172	1.13711	1.67292	0.42972	0.815145	-2.21699	-0.664941	0.457615	1.68748
157	1.26899	2.09531	1.58742	2.86818	1.55375	2.76341	1.45684	2.47906	1.41866	2.13216	1.44051	2.79825	1.33376	2.0222	0.762245	2.44235	1.30272	1.77094	1.26837	2.1648	1.51467	1.34918	1.45194	2.78765	1.86214	2.14904	1.78424	2.26907	1.87056	2.19767	1.03278	1.87787	1.97328	1.32532	1.81218	0.819919	1.17357	1.15217	2.44484	1.08184	1.86796	1.9829	2.38822	1.50293	1.79835	1.00899	1.29185	1.83301	2.31877
158	9.02241	6.29072	8.81298	7.60778	9.13672	8.28206	8.07684	7.63414	8.76923	7.22769	7.46763	5.51195	8.5408	8.16572	8.73985	8.08407	8.35598	8.07574	8.66937	8.23292	8.55166	5.52708	8.55941	7.32175	7.57064	7.07848	8.17674	6.27202	8.70298	7.78623	8.91434	7.41415	6.8437	7.04749	7.35776	7.75177	9.23419	8.6491	5.54128	8.80886	6.41963	7.44699	6.96184	8.5814	8.14516	8.01832	8.30949	7.50872	6.63821
159	-0.644931	1.14655	-0.861104	0.558386	-3.01498	0.242187	-0.858463	0.467512	-0.778109	0.000927925	-0.328407	0.655484	-1.03688	0.264729	-0.469936	-0.169863	-2.59568	-0.7358	-2.49949	0.0315061	-0.792308	-1.17872	-0.987526	-0.00992441	-0.0210571	0.394471	-0.305003	0.191483	-2.468	0.132784	-2.7505	-0.497847	-0.358424	-0.383888	0.0657558	-2.88581	-0.538201	-3.17951	0.340828	-0.910265	-0.124506	0.00413418	0.2005	-3.51103	-0.430718	-3.30248	-2.2864	-0.555434	0.41734
160	1.56997	-0.161662	1.45987	0.387112	1.82246	0.0283127	0.983209	0.411587	1.52473	0.22652	0.897418	0.149765	1.31907	0.0983076	1.60357	0.176596	1.51155	1.23235	1.13006	0.881	1.38073	-0.310539	0.887769	0.561865	1.71953	0.575875	1.25451	0.470096	1.57326	1.25339	0.89742	1.2945	0.304638	0.940802	0.297607	0.7475	1.56837	1.24951	0.128564	0.864695	0.363249	1.16301	-0.0353031	1.13206	0.217816	0.928905	1.11246	1.75073	0.0720539
161	-2.22889	-0.614267	-1.99948	-1.40591	-2.83708	-1.05746	-2.81428	-1.70801	-2.35281	-1.77096	-2.71131	-0.967715	-2.36914	-2.01184	-2.47479	-2.26635	-2.70344	-1.96565	-2.84196	-1.72161	-2.15903	-2.16919	-2.30942	-1.02997	-2.14344	-1.25832	-2.11356	-1.63281	-2.16224	-1.42655	-2.95133	-2.01274	-2.09166	-1.66916	-1.74293	-3.30441	-2.98732	-2.31874	-1.21481	-2.90063	-1.42831	-1.23855	-0.916047	-2.3739	-1.40026	-2.07269	-2.41165	-1.92298	-1.17419
162	-2.16229	1.85681	-1.72411	-1.07297	-2.40416	0.314069	-2.38577	-2.10268	-0.685143	-2.66753	-1.25574	2.14614	-2.91358	0.145777	-2.38006	-0.242022	-2.14108	-2.53025	-1.08475	-0.568058	-1.97199	-0.899863	-3.062	-1.02328	-2.53019	1.15536	-3.14742	0.83576	-1.95929	-2.33988	-3.5095	-2.19725	1.47056	0.192626	-2.74803	-1.71938	-2.67802	-2.35751	0.30082	-2.06872	-0.896122	-3.14605	0.655165	-2.22421	-0.883992	-2.46323	-2.21712	-2.48945	2.70063
163	0.70001	0.669823	0.664676	2.46647	-0.104569	1.72109	1.09648	2.26927	0.574933	1.68792	0.707975	2.38465	0.414737	0.969485	0.521608	0.529854	0.471321	1.0572	0.94955	1.17003	0.625072	0.47794	0.671041	1.06965	1.04134	1.63893	0.693363	2.24048	-0.0465784	2.25475	0.52675	1.08095	2.13763	-0.569383	1.84589	0.643845	0.377268	0.861132	0.830028	0.763893	1.60969	1.13749	1.90018	0.6092	1.50643	0.394055	0.930767	1.29547	2.30199
164	1.41997	-2.60888	1.38418	0.207653	1.61	-0.487655	0.293315	-0.273349	1.0371	-0.672839	0.0817757	-0.979173	0.84907	-0.461636	1.3499	0.268885	1.58439	1.26977	0.627563	0.480055	1.71159	-0.526502	0.598528	0.253213	1.67462	0.0748339	1.01871	0.26113	1.63617	0.880075	1.06687	1.20485	0.0762854	1.3139	-0.210529	0.450004	1.29473	1.00326	-0.0285234	1.0673	-0.557773	0.977989	-0.162749	1.06522	0.39891	0.977989	0.951797	1.35465	0.160946
165	-3.18348	-0.630575	-2.5956	-0.166752	-2.85954	-1.56392	-3.00537	-1.31625	-2.72591	-2.67664	-2.59248	-1.68589	-2.64269	-1.58275	-2.66303	-0.830032	-2.64829	-1.27689	-2.29889	-1.58839	-3.00412	-1.96694	-2.23745	0.262425	-2.54673	-1.99239	-2.24053	-0.816061	-1.53463	-1.95232	-2.2834	-2.14424	-0.592804	-2.90625	-2.78179	-1.96894	-2.9787	-2.16427	0.926644	-2.87848	-2.51676	-2.34021	-0.513236	-2.67392	-1.831	-2.08294	-2.99726	-2.91688	-2.20239
166	-0.6387	0.239394	-1.00393	0.338152	-1.06976	0.700221	-1.64576	-0.209059	-1.04858	-1.50825	-1.64735	-0.241624	-0.688142	0.206045	-1.53155	-0.0589652	-1.61285	-0.470333	-1.63906	-0.0245576	-1.05374	-0.784	-1.86207	0.38908	-0.856469	0.605425	-0.677985	0.361245	-0.621758	0.138679	-1.29715	-0.135294	-0.341208	0.407376	-1.11506	-1.9163	-1.7696	-1.91421	1.37992	-0.759916	-0.762947	-0.497787	0.538321	-1.17453	-0.809564	-1.86225	-1.18817	-0.822924	-0.0585346
167	4.98434	2.82508	4.64274	3.22361	4.83485	2.55495	3.37383	2.8462	4.23728	2.16489	3.79046	2.05269	3.9333	1.92877	3.91311	2.53984	4.32752	4.33037	3.91784	3.24216	4.47255	2.3457	3.65412	4.13172	3.73591	1.30959	3.91531	3.37224	4.65221	4.4739	4.21161	4.71301	2.56129	3.26686	2.27835	2.91148	4.31779	4.08003	2.71777	3.93197	1.86582	3.62982	2.35489	4.20068	2.85553	3.40893	3.12909	4.58473	2.41676
168	1.57707	2.79	1.09434	2.49734	1.25295	2.9768	0.457877	1.28118	1.5652	0.793244	1.63645	2.41838	0.968589	2.08708	0.984682	2.10066	0.818417	1.25171	1.78765	1.77348	1.21518	1.78867	1.24244	2.26321	1.2195	2.67416	1.42346	3.69723	1.28654	2.06164	0.723251	2.08452	2.21062	2.13666	1.48906	0.714541	1.20185	1.03409	3.27288	0.808654	1.56333	1.12821	3.02773	1.70232	1.82789	0.944572	1.01805	1.53841	3.20469
169	2.35879	-2.8001	2.29588	1.27149	2.25691	0.594685	1.7279	1.48263	1.81181	0.301965	1.36635	-2.1406	1.63026	-2.87429	1.26782	0.40621	2.24678	1.20092	3.14596	3.04819	1.61421	-0.769049	3.08031	2.50894	1.71938	-2.75087	2.53566	0.293746	1.73889	1.88943	1.76084	2.26798	1.4746	0.104136	0.806384	1.91631	2.08128	2.4884	-0.684062	2.24138	-0.828737	1.61885	-1.23845	1.36922	0.662372	0.471008	0.506586	1.24571	-1.22637
170	-0.883358	0.98168	-0.803852	0.627703	-0.959306	0.413477	-0.915093	0.200228	-0.858369	-0.0434542	-1.28559	0.596077	-0.645357	-0.215416	-0.64797	-0.508431	-2.62694	-0.374156	-2.15105	0.0557446	-0.836755	-0.980894	-1.0062	0.369658	-0.613728	-0.201174	-0.569391	0.121298	-0.675476	-0.00292873	-0.896	-0.518508	-0.414953	-0.742774	-0.00813198	-1.97255	-1.01776	-1.15609	0.0848684	-0.721598	-0.29701	-0.292785	0.473467	-0.734744	-0.15408	-2.2889	-1.775	-0.439959	0.720496
171	-2.93639	-2.75403	-0.250309	0.0164747	-2.417	-0.322394	-0.261992	-0.340903	-2.10748	0.107066	0.110456	-1.85186	-2.87302	-2.13529	-2.26107	0.176144	-2.53841	-0.546109	-2.96458	-2.29773	-2.27465	-0.67266	-3.77802	-0.0334897	-3.3458	-0.184626	1.52012	0.722663	-3.0788	-0.489527	-2.39832	-0.245239	0.878726	-3.29817	-3.00351	-2.26788	-2.66373	-3.16709	0.408484	-2.68685	-0.0785809	-2.11693	0.938653	-3.40073	0.904058	-1.10181	-2.90307	-3.21052	0.186786
172	2.11857	-0.813536	1.94725	0.480152	1.97957	0.859428	1.53179	0.380033	1.45186	0.452819	2.06922	-1.93934	1.56072	0.56596	1.49719	-0.435421	1.51591	1.31306	1.32942	-0.261022	1.8155	0.147896	1.05962	1.021	1.8815	-1.98954	1.97193	0.734356	1.6317	1.64637	1.53307	2.00772	0.7896	1.83799	0.470822	1.32117	1.86589	1.71515	0.741458	1.36039	1.9814	1.43441	0.628913	0.898458	-2.42595	1.52648	1.13479	1.19746	-0.535323
173	8.21877	4.89094	8.35814	6.80987	8.65282	5.58169	6.49695	5.52944	7.37594	3.28403	5.98822	4.91278	8.09537	3.4105	7.44639	3.87562	8.22153	8.38922	6.94113	5.79139	8.18946	5.57098	6.5472	6.75438	8.17762	2.49156	8.2755	7.50359	8.05592	8.48931	7.12891	7.70416	6.28442	6.57078	4.18348	6.12396	7.98679	7.38797	6.61052	7.76651	5.52	8.18216	6.89378	7.5354	5.62662	7.28312	7.41379	8.722	5.11311
174	-1.05027	0.965036	-2.68854	1.01602	-0.930649	0.415938	-1.11003	0.510205	-2.8857	-0.484299	-1.03308	0.85915	-2.68403	-1.28948	-2.12291	-1.38634	-1.1034	-0.436621	-1.93965	0.277773	-1.0314	-1.1624	-1.29428	0.858095	-0.657455	-2.69464	-1.04254	-0.0662422	-1.26653	0.126802	-3.37371	-0.835464	-0.62708	-1.10884	-0.294408	-1.97583	-0.80067	-2.30367	0.482	-0.885638	-0.542727	-0.42303	0.379217	-0.925292	-0.205867	-1.53432	-2.46275	-0.2845	0.655446
175	2.44959	0.704222	2.63716	1.33005	2.80014	1.26105	2.08467	2.15837	2.63412	1.4469	2.31782	-0.35143	2.60156	-0.645509	2.19971	1.98477	2.68026	2.30378	2.64295	2.33167	2.05638	1.15881	2.35679	2.02249	1.56715	-3.17788	2.55821	0.517179	3.21325	1.9351	2.74085	2.47224	0.916349	1.86085	1.86963	2.17737	2.66423	2.18639	1.72935	2.44673	1.45151	2.35438	0.0856924	2.49571	0.943661	2.36025	2.01557	2.34478	0.178566
176	0.978231	-3.19466	0.92139	-0.70516	2.44198	0.718841	1.21945	0.495474	1.55572	2.12243	1.14806	-2.82015	2.21462	-0.399541	3.40479	1.16955	2.09674	1.6761	0.524391	1.72824	1.1569	-4.41517	1.59122	0.356737	0.711861	0.396684	1.17475	-0.592103	2.12265	-0.218238	2.35962	0.18794	0.11128	1.23672	1.05236	1.12201	2.70369	1.13012	-0.866034	1.86753	0.266275	2.58817	-0.0411921	0.025486	0.259526	1.78111	1.22584	1.98289	0.232331
177	-2.58327	-1.11524	-2.9395	-0.459562	-2.30327	0.253275	-1.93718	-1.20756	-1.96619	-1.04338	-2.61236	-0.067029	-2.62526	-0.696327	-2.51118	-0.768173	-3.08062	-1.87354	-1.99799	-0.651052	-2.52687	-1.60508	-0.804847	-0.770078	-1.87765	-0.742517	-1.49683	-0.551965	-2.78902	-1.62803	-2.1895	-1.92673	-1.67525	-0.63212	-1.50652	-3.57303	-2.20779	-2.12563	-0.186705	-1.52851	-1.25322	-0.935967	-0.275832	-0.973625	-0.80849	-2.273	-1.76633	-1.22024	-0.404733
178	1.37317	-0.867454	0.883297	-0.96211	0.475235	-0.948018	0.144509	-0.814639	1.40859	-1.02401	0.266173	-0.875333	0.587566	-1.27389	0.785764	-0.607164	0.670348	0.314419	0.801046	0.00736189	1.08454	-1.68482	0.726714	0.0686707	0.742191	-0.62847	0.505018	-0.172461	0.884892	0.386368	0.385326	0.84682	0.0663128	1.03178	-0.585387	-0.387422	0.979829	0.551759	0.361749	0.457148	-1.14255	0.568459	-0.581542	-0.544475	-0.115258	0.450264	0.860905	0.291847	-0.722295
179	2.72042	2.75345	2.29273	3.94305	2.23866	4.30215	2.05711	2.19008	2.45564	1.51716	2.31996	3.55697	1.8684	3.28868	1.80985	3.42403	2.3214	2.99392	2.49575	3.6726	2.02119	2.77222	2.48654	3.72175	2.24727	3.93902	2.38672	4.72215	2.83767	2.96144	1.75771	2.89828	3.64369	3.23453	2.49622	1.6981	1.97575	2.02553	4.44002	2.05076	2.77751	2.755	3.86046	2.68306	3.01806	1.80144	2.14706	2.61966	4.30956
180	1.68036	2.61982	1.75978	2.97665	1.81914	2.95994	1.23036	2.22196	1.75907	1.57983	1.69617	3.12093	1.20632	2.67009	1.04438	2.74681	1.51593	1.77709	1.67192	2.30496	1.38529	1.94964	1.59197	2.98963	1.32066	2.8337	1.85144	3.13403	2.1186	1.76692	1.19465	2.57947	2.57152	1.18115	1.75755	1.31056	1.79791	1.42623	3.59101	1.47532	2.12355	2.19944	2.89667	1.37026	1.84543	0.472876	1.13509	1.81523	3.18343
181	0.64461	1.31752	0.668874	3.00689	0.585891	1.50107	0.540208	3.17172	0.529946	1.15191	0.650695	1.57603	0.363748	1.05189	0.181035	0.273715	0.646546	0.873838	0.353385	2.11593	0.533402	0.123233	0.543305	2.39959	1.04535	0.476727	1.1508	1.76594	0.671389	2.88384	0.652945	1.21075	1.50219	0.0565443	1.68067	0.476249	0.704769	0.532542	1.93159	0.451859	1.12921	0.947524	2.27974	0.477488	1.27283	0.0484314	0.780669	1.32565	2.24358
182	-0.120027	0.945795	0.00372076	0.943304	0.257202	0.666831	-0.495191	0.64835	-0.194807	-0.15962	-0.506927	1.13323	-0.8252	0.990033	-1.87767	0.882478	-0.0195026	0.105601	-0.169197	0.59713	-0.429635	0.337388	-0.196107	2.19777	0.0516491	1.07833	0.128249	0.920697	0.411009	0.644208	-3.70482	0.317818	1.11096	0.501191	-0.323296	-0.861123	-2.20585	-0.477815	0.991796	-1.31849	0.186458	0.0161629	1.08085	-0.44527	0.399331	-1.0584	-0.0438299	-0.239573	0.907818
183	-2.16424	-1.58157	-2.72026	-0.610208	-1.35255	-0.507114	-2.43162	-1.95506	-1.96608	-1.72671	-2.55542	-0.229714	-3.008	-1.09987	-2.43173	-0.284965	-2.8961	-0.93714	-1.65132	-0.570521	-1.35165	-1.86724	-3.21034	-0.347968	-2.57249	-0.503196	-1.42602	-0.118804	-3.49812	-2.49028	-2.80025	-1.87283	-0.0183859	-0.264096	-2.48324	-2.70568	-3.22641	-2.42045	0.388518	-2.26058	-0.819924	-1.27469	0.355619	-2.05175	-1.51889	-2.51895	-3.1059	-2.00881	-0.249002
184	0.736228	-0.934184	0.528739	-0.197651	0.671483	-0.510202	0.162137	-0.253048	0.22529	-0.169641	0.279875	-1.00885	0.286348	-0.44085	0.436362	-0.0415254	0.425613	-0.354405	0.42714	-0.185498	0.719809	-0.8704	0.398495	-0.179103	0.712126	-0.554649	0.493799	-0.404193	0.689526	0.0649548	0.439614	0.600671	-0.750422	0.794375	-0.464865	-0.176023	0.368094	0.431524	-0.542097	0.0449638	-0.605577	0.0203209	-0.882416	-0.0843258	-0.201614	-0.208145	-0.267454	-0.186302	-0.733792
185	-2.68223	1.63616	-1.70228	0.218999	-0.997685	0.616761	-3.51213	-0.473459	-2.03022	-0.572242	-2.17738	0.626163	-1.99088	-0.254551	-3.07845	-1.08378	-2.84308	-0.3712	-0.986984	0.325504	-0.49286	-2.88705	-0.621908	-0.129311	-2.18004	-3.02122	-0.402575	-0.641393	-1.32328	-0.281748	-2.7285	-1.09575	-1.35109	-3.05541	-0.27457	-2.74856	-3.06212	-2.27214	-0.12854	-2.93654	-0.72082	-0.219563	-0.191195	-0.811653	-0.51333	-2.6954	-2.45233	-0.80779	-0.105988
186	0.100593	1.4017	0.0838752	1.12211	0.207365	1.39613	0.0884562	0.657975	0.444997	0.38706	0.273938	1.52775	-0.134755	1.21574	0.0767045	1.10016	0.129559	0.331661	0.49439	1.00012	0.123855	0.294433	0.555021	1.1231	0.0978937	1.85612	0.501612	1.57016	0.63039	1.12112	0.0363889	0.799698	1.52204	0.794375	0.385324	0.311505	0.138194	0.156032	1.49303	0.0265455	0.781129	0.693047	1.4038	0.310846	0.749356	-0.329698	0.287652	0.485006	1.4976
187	-2.3978	-1.7119	-2.36745	-0.856975	-2.55351	-0.678642	-3.08404	-0.523841	-2.15908	-1.84063	-2.69267	-0.8987	-2.75799	-0.505711	-2.69165	-0.272962	-2.28257	-2.47783	-0.75826	-0.572482	-2.38774	-0.665904	-2.22214	-0.246911	-2.80851	-0.098485	-3.5729	-0.605676	-2.11086	-0.748401	-2.76553	-0.920672	-0.336601	-0.0203447	-3.14666	-2.4507	-3.0394	-2.65957	-0.744602	-2.24994	-0.832384	-0.339842	-0.46104	-2.5157	-1.91833	-2.07825	-0.652741	-0.562263	-0.601928
188	8.86508	6.22327	8.83643	7.58002	9.08684	8.1695	7.87543	7.42581	8.68741	7.24327	7.27837	5.56527	8.40248	8.14823	8.59651	7.93427	8.29738	8.01841	8.57683	8.0967	8.56839	5.47154	8.29863	7.12021	7.31065	6.92418	7.90082	6.24216	8.52634	7.68889	8.67602	7.27092	6.68258	6.8421	7.40257	7.67624	8.96081	8.5457	5.47677	8.77755	6.5531	7.36199	6.76534	8.50803	8.19902	7.96348	8.26145	7.51016	6.67242
189	0.551343	5.35206	0.590637	3.36607	0.969293	2.98584	1.01251	2.19863	1.06246	2.39482	1.61505	3.55531	0.857702	1.06782	0.966806	1.02813	0.985375	1.91967	0.281061	2.27703	0.811267	0.774466	0.426251	2.00305	0.942452	0.927773	1.30932	1.96232	0.929458	1.97021	0.428954	1.52463	1.11937	0.675485	1.89711	0.050662	0.928807	0.454524	2.49745	0.295444	1.30065	1.85889	2.17437	2.0319	1.5897	0.175431	0.958177	1.85269	2.5901
190	-0.125256	1.024	-0.596921	0.871339	-0.253055	1.40468	-0.487743	0.376362	-0.25706	0.205245	-0.315268	0.661329	-0.81898	0.262156	-0.772015	0.619868	-0.485497	0.0409393	-0.419204	0.68333	-0.444471	-0.00902319	-0.331405	0.781529	-0.253056	1.30938	-0.546089	0.847891	-0.493482	0.380487	-0.495975	0.0672235	0.906599	1.32426	0.11499	-0.62362	-0.208354	-0.387177	2.22007	-0.508965	0.0678244	0.0675745	0.873865	-0.236543	0.0752144	-0.287645	-0.489276	-0.238355	0.660958
191	0.0668082	1.05144	0.142237	2.03054	-2.95809	0.916265	-0.803047	1.17626	-0.346816	1.35767	-0.123354	0.565538	-0.23896	-0.0960979	-0.186672	0.850976	-3.06127	0.367657	-2.99631	1.05872	-2.9139	0.475484	-2.74473	0.872571	-0.0623732	-2.20461	0.180518	0.544593	-3.36003	1.11582	0.795362	0.708117	-0.563634	-3.04459	0.939302	-2.78802	0.411937	-0.730155	0.558905	-0.732233	0.175267	0.102949	1.05947	0.494027	-0.0214272	-2.77049	-0.295729	0.674405	0.870245
192	3.52975	6.25273	3.51376	5.7678	3.28136	5.89608	4.12102	5.26858	3.69088	5.1815	4.70865	5.64351	2.73067	3.94417	2.71669	5.18393	3.27442	3.874	4.43771	5.45694	3.11524	4.03325	4.58965	5.3847	3.89183	5.46092	5.30759	5.31358	4.96639	5.40251	3.14137	4.29416	5.54647	6.15055	4.58333	3.82154	3.3315	4.23547	5.69717	3.49152	5.02211	4.39449	5.11704	3.85966	4.82876	2.22808	3.2102	3.90314	6.20824
193	0.900374	-2.93215	0.598536	-0.769996	0.582961	-0.758042	-0.126112	-0.673697	0.341207	-0.896994	0.567891	-0.992887	0.324037	-0.0484371	0.137456	0.0758643	0.163616	-0.0402021	0.191389	-0.0391717	0.71511	-0.628899	0.0711689	-0.323722	0.891422	-0.11019	0.51675	-0.754742	0.203094	-0.0211039	0.345039	0.654338	-1.01796	-0.0878477	-1.00379	0.00989246	0.528945	0.150531	-0.63418	0.0137978	-0.644302	0.141085	-0.786358	0.0320625	-0.474196	-0.0364418	-0.250592	0.200945	-0.950787
194	-0.319746	-2.18424	0.223172	-0.884207	-0.0366893	-2.42075	0.49926	0.567275	-0.169725	0.0416832	-1.44949	-2.40424	0.483692	-2.81868	-1.19053	-3.1287	-0.440589	-0.32982	0.217709	-0.441454	-0.375121	-3.89746	0.404888	-0.305748	-0.701592	-1.56498	0.26138	-3.46497	-0.0105953	-3.03561	0.397188	-0.395848	-3.18302	-0.823694	-0.726693	-0.30173	0.134802	0.448572	-1.38369	0.136127	-1.7013	-0.404207	-1.96348	-0.984363	-0.283554	-2.76278	-0.833962	-0.944223	-2.65862
195	1.88459	-2.44841	1.37917	0.00128937	1.51358	-0.417928	0.526487	-0.246884	1.21025	-0.108184	0.88645	-1.04498	1.07664	0.171827	0.230489	0.832843	0.808801	0.807026	1.386	1.19228	1.34978	-0.527918	1.29964	1.14355	1.1145	-0.45803	0.98884	0.0755711	1.48677	0.325288	0.808588	1.18585	0.0372744	1.14366	0.637278	0.487567	1.32158	1.30183	0.666162	0.638021	-0.904366	0.617827	-0.49573	0.503432	0.270496	0.789783	0.900546	0.932275	-0.705142
196	-0.57159	-2.90739	-0.741964	-1.66213	-0.759623	-3.42371	-1.17863	-1.3647	-0.732493	-1.92038	-1.19109	-2.1641	-1.07553	-2.18983	-0.913347	-1.71307	-1.084	-1.02537	-1.06765	-2.65877	-0.840012	-1.87806	-1.04792	-1.40088	-0.563998	-1.70086	-0.826186	-1.91357	-0.839589	-0.967084	-0.815448	-0.628359	-2.20715	-1.33229	-3.1286	-1.08962	-0.747418	-1.16113	-2.05103	-1.20578	-2.49939	-1.12675	-2.91461	-1.30629	-1.71022	-1.34008	-1.25361	-0.770464	-1.44396
197	0.513567	-2.77503	0.606873	-0.368929	0.673967	-0.85265	0.249278	0.0402555	0.783566	-0.355421	0.724873	-1.05925	0.581729	-0.221393	0.87165	-0.585133	0.437763	-0.317272	0.0986495	-0.0515056	1.12419	-0.919995	0.553183	-0.538319	1.36271	-0.157486	1	-0.505718	1.02207	0.413774	1.41637	1.50019	-0.169117	0.574288	-0.0609646	0.865116	1.39039	1.2453	0.203692	0.777472	-0.161558	0.874818	-0.301198	0.0535135	-0.951624	0.422361	0.242354	0.395245	-0.165435
198	9.31992	6.47954	9.10211	7.97999	9.37432	8.75049	8.54865	8.14057	9.13087	7.63172	7.79054	5.94598	8.85358	8.80729	9.31458	8.39033	8.79413	8.30893	9.01022	8.50608	9.23602	6.15779	8.78579	7.49923	8.31213	7.86469	8.54206	6.78425	8.83182	8.16469	9.43726	8.11177	7.48118	7.51051	7.84623	8.30686	9.4458	9.04108	5.98367	9.25423	7.10342	8.1744	7.62886	8.80642	8.6048	8.30881	8.667	7.88042	7.14284
199	3.64736	5.04059	3.40206	5.15984	3.80952	4.87477	3.35141	4.54501	3.7901	3.80883	3.91281	4.87715	3.04455	4.23136	2.99058	4.26878	3.36652	3.8257	4.3248	4.93455	3.35107	3.6364	4.11447	5.26245	3.58721	4.31687	3.94165	4.78013	4.01622	4.44488	3.41082	4.31455	4.92655	3.65516	3.75464	3.15625	3.41804	3.51724	4.95516	3.38177	4.35563	4.02225	4.89157	3.78164	4.33956	2.67007	3.02222	3.93388	5.27963
200	-1.49225	2.66204	-3.03083	2.76019	-3.30966	3.43049	-1.89333	3.38334	3.23382	4.47433	-2.50942	4.65973	-1.63951	1.32244	-2.5564	-1.8768	-2.04271	1.76936	-3.11604	-2.91022	-3.35074	-3.51697	-2.70244	5.55557	1.16469	2.22328	6.10111	2.64793	-2.02468	2.96466	-3.34569	2.74363	2.26399	6.01904	2.50475	2.7228	-2.63923	-2.73428	-2.02353	2.39807	3.8246	-2.17629	3.85252	0.671581	3.17531	1.62044	2.01579	-2.69083	1.67554
201	6.10844	2.02992	5.52248	4.49559	5.6952	3.95309	4.91617	4.71149	5.34138	3.8164	5.39553	3.31156	5.26063	4.33048	5.23512	4.47399	5.25614	5.00888	5.27067	4.45962	5.71122	3.76261	5.06832	4.66688	6.07782	4.23802	5.44718	4.63862	5.4186	5.23292	5.33238	5.9205	4.47352	4.6517	4.17109	4.7629	5.34727	5.26717	4.10773	4.84116	3.69551	5.20033	3.98312	4.68631	3.85878	5.18538	4.94363	5.21245	4.35481
202	-0.575026	-1.92957	-0.705906	-1.64357	-0.358016	-1.4466	-1.01263	-1.50948	-0.735229	-1.50329	-1.03222	-2.2768	-0.783617	-1.38073	-1.03489	-0.97027	-1.13123	-1.19888	-0.601881	-1.74954	-0.986012	-2.07214	-0.652661	-1.81624	-0.773409	-1.73795	-0.851671	-1.6229	-0.737213	-1.12264	-0.950008	-0.643149	-1.99343	-1.33724	-1.26568	-0.936137	-1.03336	-0.467102	-1.91784	-0.993328	-1.97772	-1.11151	-1.44258	-1.2065	-1.29852	-1.07241	-1.17984	-0.87846	-1.77276
203	0.189964	1.16814	-1.0367	2.1898	0.329224	1.11915	0.100511	0.993448	-0.110309	0.754258	-0.0510864	2.2135	-0.229633	0.144014	-0.662597	-0.0899882	-0.0766602	0.597586	-0.478895	1.26533	-0.24509	-0.138984	-0.187189	1.33629	-0.229772	-0.180219	0.269874	1.30051	0.732162	0.757318	-1.24644	0.260385	-0.26085	1.60205	1.42138	-0.249104	0.802134	-0.584517	1.48691	-0.407356	0.691735	0.19755	1.38674	0.169096	1.23217	-1.09784	-0.200367	0.593441	2.07668
204	0.351532	2.34148	-0.0853906	1.43016	-0.00410509	1.59936	0.185715	0.931195	0.297589	0.203708	-0.0343752	1.68132	-0.159168	0.467696	0.132436	1.27756	0.113759	0.353627	0.823355	1.34233	0.215063	0.158966	0.96967	2.23825	0.112295	1.72243	0.126148	2.17221	0.93621	1.20117	-0.210737	0.837868	1.87376	1.65921	0.324993	-0.355512	0.0328703	0.366398	2.91183	0.200031	1.00512	0.596789	2.23397	0.0677032	1.20749	-0.0595922	0.141774	0.596175	1.70952
205	-0.390838	-1.93778	-0.461311	-1.47612	-0.647925	-2.17848	0.109279	-0.534661	-1.09922	-1.58808	-1.79461	-2.4183	0.161349	-2.04129	1.25099	-1.6688	0.282004	-1.0454	-1.67702	-2.13989	0.280444	-4.02629	-0.837021	-1.69123	0.231592	-1.23765	-0.197764	-1.84007	-0.80066	-1.49676	0.522575	-0.13686	-1.48772	-1.15181	-2.9912	-0.898921	-0.416356	-0.474505	-2.395	-0.539966	-2.70173	0.232838	-2.72728	-1.83428	-1.83507	-0.878844	-1.3003	-0.36569	-3.05875
206	2.99623	1.54181	2.49636	1.93093	2.73735	1.30326	2.15918	1.63554	2.39743	1.77225	2.09343	1.61854	2.65787	0.864954	2.64451	1.38945	2.62638	2.07488	2.21256	1.95043	2.52925	0.739907	2.34682	1.88188	2.2057	1.48631	2.44604	1.70071	2.39153	2.07756	2.29458	2.63745	1.74486	2.17112	1.51556	2.2531	2.51717	2.46534	1.32376	2.28154	1.44219	2.16161	1.49707	2.02675	1.61078	2.59022	2.04347	2.30886	1.90742
207	3.75525	5.97301	3.98382	5.6058	3.95647	5.83674	3.67316	5.10423	3.76086	3.63706	3.78699	4.95256	3.55682	3.68548	2.65182	4.38062	3.8437	4.46671	4.05252	5.33648	3.35637	4.03399	4.20357	5.76137	3.75375	3.84121	3.89013	5.4152	4.37545	5.59246	3.62098	4.53895	4.37144	4.93864	4.39265	3.34408	3.7261	3.45826	5.67627	3.55345	4.14471	4.30524	5.25646	3.73059	3.99927	2.95488	3.49149	4.5903	5.19765
208	2.46662	-0.65073	1.70836	1.29934	2.26858	1.08237	1.64574	1.00128	1.73867	1.53136	1.75799	-0.108476	2.01236	1.29822	1.8932	1.22302	2.29428	1.59687	1.86849	1.74029	2.01698	1.13921	1.81767	1.41129	1.72019	1.1438	2.34401	0.989832	2.09496	1.09022	2.04966	1.74347	0.347361	1.27978	1.08806	1.52015	2.53431	2.15848	0.577085	1.88035	0.921646	1.77258	0.239493	1.6357	1.22618	1.80323	1.81115	1.03041	0.475291
209	0.107972	0.420489	0.149537	-0.0593719	0.462245	-1.31613	-0.583865	-1.00196	0.0209999	-1.55467	-0.444103	-1.51166	-0.41929	-1.41753	-0.802107	-1.43225	-0.351176	-1.01881	0.153574	0.0244412	-0.694967	-1.72948	0.216238	-1.51849	-0.797051	-1.89566	0.327299	-1.35971	-0.0555344	-1.09504	0.269675	0.184061	-1.71166	-1.30898	-0.608291	-0.308517	0.632564	0.157024	-1.78292	-0.251359	-1.49291	-0.740581	-1.39022	-0.343627	-1.10479	-0.581327	-0.746383	-0.810264	-1.76217
210	2.12609	-2.48314	1.86059	0.908938	1.94407	0.24581	1.00831	0.778468	1.31175	0.107953	1.2288	-0.877954	1.29978	-0.670535	0.549158	0.285287	1.2902	1.4686	1.43006	1.12238	1.47944	0.319319	1.55213	1.06012	1.69795	-2.81924	1.84068	0.103932	1.55886	1.03544	1.14565	1.82041	0.408887	0.292271	0.651389	1.12773	1.4132	1.50133	0.000297546	0.925735	-0.0035181	1.09737	-0.757339	1.07019	0.236777	1.33345	1.05648	1.35083	-3.30938
211	-0.514689	-3.10065	1.43398	-2.53	1.11379	-3.06872	-0.781213	-3.1222	-0.239852	-1.27278	-0.280341	-1.92132	-1.09526	-1.34682	0.0494056	-2.25602	0.148784	-0.712762	-1.08059	-1.19884	1.53746	-1.78861	-1.90635	-1.81734	1.56253	-2.21991	0.000316143	-2.49323	-0.296441	-1.40099	-0.610175	-0.702082	-2.36023	-1.52959	-2.24823	-2.56301	-0.36554	-1.10699	-2.49418	-1.06315	-2.34946	-0.863245	-2.24072	-1.33288	-2.34701	-0.36517	-0.680264	-1.11019	-1.83723
212	0.246307	3.14317	-0.0923371	1.266	0.152578	1.8597	-0.49556	0.943318	-0.880899	0.257461	0.257501	2.90819	-0.195777	0.573091	-1.94411	0.146544	0.0439463	-0.232985	-0.533849	1.08876	-0.0462885	-0.528126	-0.421407	0.78988	0.128675	0.157192	0.471376	0.897962	0.0558376	0.865655	-0.0692973	0.514792	0.342256	-0.0889158	0.430715	-0.740039	-0.449529	-0.387303	2.67933	-0.299457	0.30505	0.614861	1.06177	-0.318948	0.8395	-0.666008	-0.521718	0.380831	1.43752
213	-1.25224	0.470182	-1.2707	0.781955	-1.19109	-0.0785875	-1.62412	0.499133	-1.30572	-0.350914	-0.989394	0.492436	-1.51316	-0.670879	-1.32836	-1.08439	-1.08536	-0.596867	-1.6483	0.280636	-1.64667	-1.63815	-1.26426	0.240675	-0.950788	-1.41456	-0.999607	-0.534455	-0.939384	0.567373	-0.466883	-0.998607	-1.03656	-1.59316	-0.0503235	-1.40883	-1.32456	-1.25333	0.117319	-1.1498	-0.780261	-0.730688	-0.177863	-0.692603	-0.237399	-2.3857	-1.16061	-0.555421	0.093749
214	-1.78485	0.0590057	-1.71613	0.00298023	-2.49027	0.871359	-1.73458	-0.927518	-1.03456	-2.44442	-0.983162	0.341536	-3.14053	0.44924	-3.1014	0.369298	-2.34952	-2.66866	-2.31319	-1.89882	-2.95273	-0.99426	-1.36538	-1.79451	-2.3821	0.798283	-2.75701	0.982235	-1.44551	-0.366415	-1.57426	-0.718756	0.148529	-0.902902	-1.69454	-2.08879	-2.02514	-3.06588	-0.0496235	-2.82487	-0.665297	-0.634672	0.587722	-3.02573	-0.704344	-2.50277	-2.90489	-2.52183	0.857293
215	-2.95286	1.19758	-1.96504	0.233876	-1.50298	0.0711546	-2.51304	-0.207954	-1.1893	-0.326186	-1.05364	0.525822	-2.67269	-1.3618	-2.74462	-1.19063	-1.84426	-0.839644	-2.8984	-0.117134	-1.83282	-0.623323	-1.67134	-0.375965	-1.69762	-2.45595	-1.54347	-0.0694866	-1.4915	-0.912939	-1.5842	-0.716912	-1.62165	-1.77707	0.0241632	-1.89009	-1.46081	-1.82565	0.217058	-1.75871	-0.779884	-0.618595	-0.357594	-1.1396	-1.54102	-2.61567	-2.38883	-0.743984	0.115836
216	-1.21582	0.301745	-1.82709	0.415402	-2.61405	0.3794	-2.44856	-0.863132	-0.869072	-0.0445757	-0.480853	0.646613	-2.96636	-0.927942	-1.0087	-2.07513	-3.12934	-0.714946	-2.22452	-0.562482	-2.87325	-2.73965	-1.03577	-0.911505	-1.22562	-0.471887	-1.04408	-0.227349	-1.03884	-0.636245	-3.35062	-0.616209	-0.520743	-1.28796	-0.293781	-2.91806	-3.20008	-2.40009	0.0663843	-2.72398	-0.651819	-0.703946	-0.0734215	-0.319694	-0.536147	-2.12585	-2.26776	-0.934556	0.284056
217	3.80448	0.791448	3.26382	3.19604	3.36199	1.82132	2.7988	2.41495	2.74164	2.21273	2.79025	1.4568	3.20092	2.11867	2.95043	1.95611	3.25504	2.75571	2.94193	2.67664	3.28113	1.60525	3.0317	2.45418	2.90234	2.28536	3.50573	2.15599	3.36787	2.95739	2.83537	3.07425	1.72202	2.43149	2.00709	2.64321	3.58097	3.41949	2.13734	2.54554	1.43471	3.06004	1.71442	2.93234	2.36691	2.79198	2.83605	2.89259	2.14037
218	-3.14473	-0.166521	-3.67015	-0.181238	0.244953	0.508891	-2.29393	-0.222892	-2.41342	-2.32592	-3.54371	0.0471621	-3.06453	-0.137407	-1.86506	-0.338054	-3.7979	-2.02932	0.963498	1.31894	-2.77549	0.0917954	-2.31503	0.329944	-2.80991	-0.0864782	-0.620127	-0.247908	-1.95547	-0.278126	-2.34972	-0.594865	-0.41744	0.403977	-0.164484	-3.02512	-1.97824	-2.94182	0.137745	-3.19027	-2.39468	-2.00811	0.0829239	-3.17769	-0.521062	-2.68997	-2.81551	0.29789	0.0640869
219	-3.19012	-0.677555	-2.5229	-1.10202	-3.63148	0.00871658	-1.15506	-1.3071	-1.7664	-2.71196	-1.47757	0.231078	-2.79162	-0.527688	-3.3772	-2.25171	-3.50874	-3.65367	-2.02901	-2.49458	-3.71823	-1.31047	-2.02885	-1.79628	-0.449556	0.132751	-2.52051	1.4887	-3.19148	-0.442604	-2.84603	-1.94637	-0.258528	-2.64675	-3.5348	-3.45122	-1.93413	-2.58087	-1.60467	-2.21794	-0.651685	-1.96404	0.936813	-0.937119	-0.286265	-1.25651	-1.70686	-3.08785	-1.11334
220	3.08063	3.86819	3.03484	4.38271	2.92736	4.08838	2.91983	3.72514	3.42135	3.54593	3.4316	4.32339	2.75506	3.67606	2.55333	3.73589	2.96635	3.44789	3.58238	4.16361	2.67506	3.10495	3.3416	4.29918	2.9771	3.5079	3.29559	4.10563	3.4422	3.90291	2.84034	3.35461	3.9066	3.32874	3.55048	2.71665	2.93574	3.12117	4.25983	2.85198	3.42873	3.06376	3.93089	3.30584	3.7614	2.4432	2.93476	3.45291	4.48136
221	-0.0894723	1.6208	0.278721	0.501448	-0.0905232	1.51739	-0.0303259	0.0283728	0.303635	-0.107838	0.310763	0.961642	-0.272398	0.937134	-0.436029	0.478664	-0.23517	0.320781	0.49328	1.10314	-0.0945559	1.10292	0.363915	1.20047	0.0375614	1.697	0.00165606	1.1257	-0.221996	0.61067	-0.205613	0.358656	0.894447	-0.0768461	0.686712	0.126233	-0.132393	-0.112358	1.80761	0.110165	0.917803	0.460713	0.793802	-0.0457392	0.917353	-0.103167	-0.369556	0.33154	0.901993
222	-0.809834	1.37661	-0.758114	0.920002	-0.543349	0.610274	-0.910964	-0.152705	-0.705048	-0.00305748	-0.63588	1.71493	-1.20368	-0.135311	-0.678742	-0.336377	-0.816798	-0.331653	-1.2286	0.515214	-0.755459	-0.994058	-1.02086	0.462532	-0.829354	-0.782246	-0.480282	0.0808973	-0.602387	-0.258861	-0.859362	-0.335941	-0.505452	-1.09525	0.162036	-1.3019	-0.539646	-1.15961	1.22243	-0.628467	-0.140125	0.340648	0.704394	-0.310992	0.0978127	-0.939742	-0.693989	0.0437131	1.13394
223	-0.795019	-0.210521	-1.29545	0.283205	-2.67687	-0.364069	-0.996609	0.178486	-1.10911	-0.271986	-0.339013	-0.302089	-1.22425	-0.588773	-2.55856	-1.13242	-1.56464	-0.410203	-1.19802	-0.558951	-1.28172	-0.13791	-1.37529	-0.286928	-1.27746	-0.790154	-1.19969	-0.644804	-1.38808	-0.0169888	-2.80507	-0.659493	-0.856453	-1.18995	-0.054348	-3.08034	-0.186399	-2.0759	-0.413803	-2.11154	-0.700395	-0.618663	-0.716132	-0.395708	-0.630054	-2.85217	-1.07931	-0.83414	-0.157154
224	-1.08807	0.800318	-1.26371	-0.0235243	-1.59838	-0.326976	-1.70374	-0.314277	-2.47742	-0.843554	-2.72487	0.0496979	-0.7897	-0.404999	-2.59553	-1.43661	-2.67636	-0.603662	-1.9281	-0.466395	-0.87396	-2.6304	-1.8052	-0.562347	-1.52712	-1.96623	-1.45546	-0.951619	-0.834715	-0.355995	-1.76617	-1.035	-1.49237	-2.7163	-0.588042	-2.39482	-1.87586	-2.82104	-0.684841	-1.80011	-0.752165	-1.40812	-0.372993	-2.73604	-0.591176	-1.40526	-1.22417	-0.837465	-0.218676
225	2.78646	0.686061	2.7097	5.27002	2.26244	3.98682	2.42898	2.79083	2.30469	2.01083	2.65303	2.92008	2.3432	3.50354	1.69667	3.9985	2.2277	3.18898	2.92476	4.1354	2.181	2.50222	2.95488	4.69124	2.77264	4.5401	3.15246	6.5477	2.52497	3.70753	2.56811	4.22899	4.36831	1.8969	2.70048	1.8119	2.01748	2.15589	4.07517	2.25307	3.15407	3.31887	5.2178	2.81999	4.14834	1.9645	2.02854	2.77461	4.84579
226	7.63384	3.58096	8.33559	6.64847	7.29916	6.02614	7.33447	6.47629	6.28136	5.20617	5.67281	3.88826	7.71647	5.57914	8.35832	6.6723	7.99589	8.04533	6.01007	6.0113	7.59175	5.75585	6.33912	5.86081	7.8431	5.79628	7.81307	5.50541	7.26959	6.25838	7.91849	6.86709	5.89338	6.63171	6.61567	6.7864	7.51316	6.34752	5.55936	7.08902	5.74325	6.8651	5.89294	6.41868	5.95718	7.24439	7.35718	7.67857	5.72257
227	3.95079	1.81807	3.55762	3.17301	2.9502	1.64995	3.19888	2.61291	3.57858	1.67617	3.16398	0.247103	3.47201	-0.432253	2.77564	1.09487	3.68965	3.42249	3.59617	2.5032	3.48712	0.656971	3.65061	2.80764	3.21201	2.05989	3.90312	2.53229	3.7338	4.214	3.80681	4.183	2.82057	2.8066	2.33816	2.91069	3.70057	3.54297	1.15753	3.24346	1.58805	3.24043	2.06904	3.53361	3.49218	2.70611	2.97024	3.15864	2.01605
228	0.562832	-2.10712	0.485221	0.0818348	0.986858	-0.211803	0.261648	0.540326	0.764308	-0.618368	0.76375	-1.06087	0.659266	-0.151312	0.816046	-0.213352	0.342155	0.565864	0.531447	-0.121389	0.319266	-2.68805	0.739082	0.0503535	0.60366	-1.56581	0.0714469	-1.1321	0.905196	0.686913	0.511343	0.489471	-0.892443	-0.061408	-0.0173388	0.269921	0.465919	0.612788	-0.815394	0.471253	-0.65064	0.518473	-1.52189	0.918072	-0.615873	-0.0619993	-0.0899038	0.71684	-0.873195
229	-0.400049	-0.323152	-2.16414	0.583732	-1.78251	0.129681	-2.82529	1.46296	-2.49912	-0.2921	-0.853093	-1.63363	-2.79484	-2.69899	-0.645984	-1.31878	-0.60198	-0.397417	-0.968252	-0.292253	-2.92236	-3.1109	-2.81769	0.672461	-2.57036	-1.09783	-0.807821	-0.886298	-0.677138	1.82268	-3.0854	-2.9997	-0.321065	-0.980882	1.0933	-2.54681	-3.04857	-2.58982	0.155343	-1.51317	0.126106	-1.08801	0.855663	-2.9396	0.563652	-1.46054	0.064539	-0.407653	0.347981
230	-1.40091	0.0337725	-1.89509	0.392873	-1.78455	-0.54622	-1.86737	0.135248	-0.538465	-0.458425	-1.44383	-0.253164	-1.6802	-1.43282	-1.23647	-1.76499	-1.44094	-1.43896	-1.9909	-0.655987	-1.37884	-2.57734	-1.46789	-0.391466	-0.893553	-1.57274	-1.5781	-0.844529	-1.53422	0.384216	-2.36867	-1.28799	-0.727316	-2.24324	-0.810314	-1.91193	-1.54473	-2.55629	-0.684439	-2.67669	-0.803032	-0.815754	-0.46406	-1.5485	-0.494045	-2.52298	-1.56439	-1.19014	-0.132884
231	0.310747	1.35993	-0.1195	1.76586	0.379189	2.17211	-0.310223	0.879084	-0.0478525	-0.486124	0.0415535	2.04413	0.0222187	0.813411	-2.38009	1.4764	0.368834	0.658832	0.870505	1.25756	-0.656371	0.753539	-0.0767689	1.60957	0.108965	0.0418587	0.0802112	1.57213	0.660879	1.28055	-3.20489	0.193403	0.201249	0.310585	0.90141	-0.680996	-0.0515871	-1.23156	1.47419	-0.49077	0.236681	1.10238	1.2457	0.479988	0.572343	-0.669818	-0.495525	0.573923	1.17984
232	0.843214	2.50603	1.34513	2.05087	1.3655	1.63135	1.08206	1.67176	1.17946	0.961164	1.4501	1.63344	0.584006	1.91487	0.825837	2.10066	1.24655	2.46232	1.37579	2.17802	0.503741	1.77954	1.14728	3.11697	1.36099	2.48621	1.37239	2.42993	1.11031	1.66638	0.675135	1.49799	2.33098	1.95694	1.40498	1.06684	0.66976	0.915769	3.5129	1.47725	2.22676	1.11417	2.83576	1.66834	1.31802	0.293704	0.793526	1.57911	1.66669
233	-1.92801	0.876977	-1.87728	0.286316	-2.74522	0.582283	-3.25209	-0.368984	-1.93047	-0.447275	-2.33083	0.940045	-2.54298	-0.698204	-2.23403	-0.777647	-1.71112	-1.18045	-1.62462	-0.573112	-1.62887	-2.9773	-0.543501	-0.393174	-1.16576	-1.34247	0.00445604	-0.065917	-1.23495	-0.532434	-0.157835	-0.627352	-1.03787	-1.87438	-0.796202	-2.71792	-2.09215	-2.27012	-0.0780792	-1.788	-0.587426	-0.581948	0.304561	-1.58244	-1.06843	-3.00629	-2.10459	-0.862977	-0.0402584
234	-0.374606	-0.23555	-2.44144	0.0868635	-2.15437	0.164555	-2.81433	-0.185472	-2.33943	-3.13156	-0.70407	0.0441151	-3.00853	-0.520444	-2.37389	-2.3986	-2.84778	-3.13702	-3.11011	-0.0731063	0.00532436	-3.34401	-2.95336	-0.17163	-1.80599	-0.352912	-2.89139	0.235369	-0.323529	-0.0356197	-2.22884	-0.227429	-0.265757	-0.219386	-0.555327	-3.49452	-2.93856	-2.19445	-0.0428848	-0.678631	-0.38558	-0.123708	0.292061	-3.01519	-1.0452	-1.93417	-0.568847	-2.99798	-0.0417566
235	-0.0223575	1.68964	-0.811846	0.179548	-1.04296	0.927951	-0.929421	-0.114787	-0.0669813	-0.936383	-0.275412	1.95662	-3.18719	1.47364	-1.18568	1.1609	-0.967191	-0.752509	0.0940709	0.686527	-0.468074	1.40955	0.411521	1.00357	-1.06312	1.69623	-1.0208	1.82747	-0.597716	-0.377412	-1.01695	-0.364347	1.64892	-1.88837	-0.386393	-0.946685	-0.988537	-0.400378	0.975369	-0.486072	0.431046	0.846118	1.90291	-0.433016	1.31752	-1.49381	-1.2722	-0.370607	1.83486
236	-1.40257	-0.122386	-3.07025	0.23907	-4.49037	1.08849	-2.95428	0.155358	-2.50987	-3.39033	-3.65183	0.20363	-2.26454	0.0809374	-2.75626	-0.357364	-2.43923	-4.81144	-2.81257	0.12884	-3.46687	-2.5647	-4.58975	0.142768	-3.00338	-0.273686	-2.63725	0.466698	-3.00226	-0.0606327	-2.72127	0.0865498	-2.18245	1.18936	-2.1454	-4.11942	-1.94782	-3.02948	0.732957	-2.63484	-2.52671	-0.192673	0.206881	-3.7426	-3.0742	-2.24683	-2.48382	-0.258133	-0.00152779
237	-0.267185	1.91962	-0.216437	1.30518	-0.0358529	0.507207	-0.581608	0.13521	-0.111375	-0.212377	-0.751212	0.96634	-0.963105	0.354635	-0.651093	0.229611	-0.16643	-0.200459	-0.279518	0.520416	-0.691762	-0.330669	-0.212261	1.3458	-0.671002	0.598207	-0.30749	1.3198	0.473906	0.0605326	-0.217825	0.575427	1.21654	0.944526	-0.20621	-1.0866	-0.351032	-0.228339	1.38759	-0.226535	0.357738	-0.00793362	1.14335	-0.294657	0.285571	-0.873971	-0.651446	-0.145744	1.56955
238	-1.53744	-1.03889	-1.76727	0.997867	-2.35643	-0.871317	-1.63304	1.15488	-2.26011	-1.98451	-2.70069	-1.89107	-1.71812	-2.72698	-1.77841	-2.19726	-1.73681	-1.7157	-1.87639	0.0883775	-1.85666	-2.05476	-2.08976	0.184926	-0.990412	-2.26162	-1.55422	-0.689743	-2.12239	0.825095	-2.62497	-1.37376	-1.57792	-2.24341	-0.960407	-2.76722	-2.66851	-2.77778	-0.221012	-3.04179	-1.13647	-2.08968	-0.0584936	-1.95885	-0.887087	-2.44266	-1.7855	-0.918857	-0.200936
239	-2.27753	-0.218696	-3.86747	0.338057	-2.25286	-0.669568	-3.12687	0.371106	-2.08755	-2.69701	-2.76574	-2.22927	-2.20054	-2.42208	-0.905529	-2.90327	-3.06648	-1.21025	-1.99154	0.0775533	-2.17291	-2.95274	-1.2894	-0.549688	-0.942078	-2.22864	-0.626969	-1.18769	-0.856725	0.592608	-2.21931	-1.95296	-1.18531	-2.64645	-0.83892	-2.68853	-2.57019	-2.64698	-0.594732	-2.51773	-0.523454	-2.16376	-0.326425	-3.12341	-0.756825	-2.56429	-0.991671	-0.510154	-0.093317
240	0.24275	-3.44893	0.40561	-1.21132	0.0247159	-1.54082	0.268729	0.840211	-0.614944	-2.76771	0.483182	-2.19129	0.143729	-3.0101	-0.198531	-3.06017	0.601357	-0.676274	-0.263925	-2.84754	-0.254691	-2.78441	-0.0977602	1.89663	-0.399194	-1.64928	1.28869	-0.14604	-0.526094	-2.10096	-0.407275	0.177653	-2.49836	-0.939569	-2.68948	-0.282686	0.189989	-0.0788374	-1.97538	-0.285387	-0.36118	-0.945479	-2.30493	-0.8544	-0.521235	-0.800609	-0.612693	-0.386653	-1.13352
241	0.518587	-1.28827	4.21421	0.203134	4.55491	1.31199	4.81489	4.3534	5.57724	3.76574	2.93016	-2.18835	4.24644	-2.8988	2.52896	-2.19421	1.90134	2.13938	3.73819	2.77741	-1.8624	2.09054	2.68075	2.95947	2.17291	-2.22024	2.65421	-0.752258	3.41747	1.62483	4.30897	1.29855	1.19082	2.64302	-0.50456	2.67732	2.9265	3.15374	1.43274	3.08122	3.00494	2.50493	2.16641	1.73872	3.09665	1.8139	3.09773	3.69659	-0.337748
242	1.22311	-0.925157	1.30878	0.0415659	1.16941	0.0493708	0.931975	0.343294	1.09353	0.249375	0.817307	-0.860437	1.19985	0.1396	0.357274	-0.300345	0.847937	0.518741	1.77884	1.36813	1.06378	-0.686524	1.61874	0.860164	1.27301	-0.059824	1.15325	0.286818	0.858802	0.723868	0.769251	1.11682	0.172407	0.102591	0.5093	1.11007	1.08019	1.33681	-0.649622	0.765582	0.227633	0.541002	-0.843939	0.602265	0.702651	0.651361	0.711492	1.13647	-0.676053
243	-1.10787	-1.1953	-2.71797	0.0922251	-1.3897	-0.607695	-1.61455	-0.274424	-1.04397	-0.825817	-0.70826	-1.43388	-2.92752	-0.527987	-1.46116	-0.92732	-3.22782	-0.827137	-1.18382	-0.38027	-1.67468	-1.05263	-2.76697	-0.261016	-3.04905	-0.464165	-0.997031	-0.883919	-1.68098	-0.495918	-2.58165	-1.2246	-1.21398	-1.57725	-0.971533	-2.33801	-2.55818	-3.22065	-0.475293	-2.89001	-0.509428	-1.28765	-0.36556	-1.04663	-0.779981	-2.72354	-3.04555	-1.55637	-0.510302
244	-2.10356	2.92592	-1.28131	1.25365	-1.29063	0.551584	-0.548012	0.15087	-0.590592	1.33975	-0.337487	1.28999	-1.42457	-0.550736	-1.01904	-0.538572	-1.62202	-0.165442	-2.09622	0.234498	-1.34015	-1.87425	-1.87187	-0.270779	-1.69241	-1.03632	-0.930566	-0.350878	-1.47312	-0.720573	-1.47394	-0.165016	-1.33874	-1.22839	-0.184657	-2.12922	-1.33724	-2.90167	0.1682	-1.36481	-0.467879	0.0232449	0.446017	0.0409126	-0.453115	-3.28313	-1.3125	-0.268673	0.547474
245	0.20386	2.01446	0.138257	1.52098	0.0338778	2.31961	-0.0788851	1.07291	0.0403843	0.053277	-0.139296	1.9323	0.0302401	0.691313	-0.000203609	0.171557	0.0322247	0.269935	0.0717607	1.06448	0.438695	0.351376	0.572599	1.32685	0.390233	0.307364	0.369548	1.29682	-0.151673	0.819773	-0.0463777	0.699795	0.736658	1.02272	0.760707	0.0521011	-0.23161	-0.579873	2.10123	-0.0879002	0.661672	0.887479	1.71557	-0.625012	0.62092	-0.0941238	0.383102	0.406865	1.50916
246	4.53771	1.54255	5.17149	3.43424	5.35345	4.72898	5.35497	4.85054	5.52474	4.75153	4.29508	1.35675	4.81303	1.4426	4.82573	1.82787	4.17357	3.31429	6.9386	6.46685	4.34723	1.04606	6.72159	5.36915	4.84778	2.63483	5.0153	2.2478	5.37418	4.06357	5.01792	5.06076	4.4576	4.29251	5.15605	5.56668	4.85315	5.89346	2.52403	4.91191	4.12589	3.76455	3.03544	3.8717	4.01624	3.86967	3.67542	4.20862	0.00997829
247	1.42449	0.355731	-3.11786	-0.325238	0.917346	0.172172	-0.239441	0.0753603	-0.638312	-0.694098	-0.230057	-0.0131359	-2.18042	0.285548	-2.94182	1.62188	-3.55187	1.53604	-3.92471	1.62007	-2.75672	-0.394482	1.40946	1.57762	0.224803	0.203734	-2.35391	0.664922	-2.98946	0.519464	-2.9166	-3.6749	0.379874	-2.52175	-0.163456	0.18316	-1.81293	0.04564	0.111474	-2.67449	0.436787	-2.9764	1.12889	-0.382587	0.0730925	-0.434729	-0.432854	-3.40855	-0.069768
248	-0.0754523	0.829464	-0.450453	1.16786	-0.21113	0.963166	-0.306531	0.500338	-0.0973101	-0.0109062	-0.0795088	0.824804	-0.271942	0.325809	-0.726158	0.520525	-0.170171	-0.0389633	0.106211	1.10534	-0.092659	-0.0673833	0.191392	1.30705	-0.507774	0.316213	-0.156342	1.12629	-0.124893	1.22936	-0.624632	0.109518	0.605037	0.480254	0.541248	-0.239834	-0.187255	-0.344285	0.964104	-0.402961	0.231332	0.429943	1.16991	-0.0258198	0.453687	-0.587019	-0.201064	0.179361	1.19418
249	-0.638155	1.64711	-1.00035	0.549488	-1.04363	0.580506	-0.749295	-0.365057	-1.35169	-1.02643	-0.919394	0.808522	-1.29701	-0.694844	-2.38393	-0.880591	-0.882121	-0.776423	-1.29601	-0.288927	-1.01298	-0.410363	-0.98656	-0.217596	-0.871984	-0.904287	-0.354297	-0.0117865	-0.643297	-0.0969152	-1.26874	-0.609462	-0.566292	-0.906873	-0.508557	-1.49177	-1.02078	-1.55648	0.170886	-1.45759	-0.705298	-0.770029	0.14961	-0.847988	-0.426074	-1.95262	-1.04556	-0.503701	0.72412
250	-1.87109	-1.09544	-2.61866	-0.944657	-2.5349	-1.5364	-2.79787	-2.1956	-1.82616	-1.28214	-1.87246	-1.02511	-2.96275	-0.908797	-2.57007	-1.28427	-2.01687	-2.48007	-3.06724	-1.72169	-2.34457	-1.83577	-2.44111	-1.67887	-3.56398	-1.18335	-2.21714	-0.943915	-1.80642	-1.2922	-3.49987	-1.32293	-1.8492	-1.22042	-1.6514	-2.51878	-1.55267	-3.05632	-1.36364	-3.36414	-1.43391	-1.48314	-0.698471	-2.82558	-1.20293	-1.63807	-2.40383	-1.34439	-1.2278
251	3.96395	4.94326	3.80683	5.4176	4.00326	5.04143	3.77911	4.78772	4.00159	4.11347	4.08271	4.87963	3.60276	4.60117	3.28794	4.57861	3.72443	4.20076	4.6188	5.11886	3.64946	3.91573	4.36635	5.36451	3.89103	4.48362	4.26345	4.9957	4.21025	4.77145	3.59135	4.4348	5.04456	4.17354	4.2929	3.74933	3.8455	4.1044	4.94726	3.59682	4.33832	4.13872	4.97116	4.0816	4.57216	3.02331	3.73021	4.23209	5.36418
252	-0.184309	0.944899	0.191429	1.34917	-0.65407	1.26107	1.48753	1.89525	1.37081	1.2431	0.923078	1.44475	0.86508	1.24957	-0.570166	1.42297	-0.507992	1.46001	0.930294	0.869049	0.0532541	2.34059	1.20166	1.77396	1.26225	2.08112	0.513148	1.60177	0.0734777	1.49004	0.903975	0.791681	1.86269	-0.0428848	1.27242	0.949668	0.790598	0.894358	1.80557	1.02146	2.61593	0.00650406	1.95443	1.3017	1.28504	0.218564	1.02111	0.808099	1.64852
253	2.09169	1.28688	1.86845	1.14692	2.36144	0.793033	1.55422	0.77951	0.976862	-0.0400085	0.937409	-1.32088	1.39927	-0.795523	1.36773	0.384973	2.27059	1.6132	2.09541	1.89442	1.40478	-0.277524	2.23738	1.51962	1.69927	-0.114916	2.30567	0.783431	1.95929	1.3045	1.27402	1.64005	0.990461	0.204905	0.573333	1.63425	1.91143	2.41711	0.11068	1.10944	0.0587397	1.37119	0.0201921	1.26388	0.724169	-0.0305357	0.470322	1.58023	-0.218297
254	0.755449	-2.19675	0.214235	-0.44585	0.484731	-0.54635	0.654859	-0.424992	0.333084	-0.0944853	-0.141322	-2.45391	0.246261	-0.354253	0.291549	-0.32872	0.350486	-0.257029	1.13949	0.175214	0.117759	-1.33384	1.20245	-0.504019	-0.211382	-0.956082	0.0669093	-0.358149	0.422181	-0.385082	0.0373006	-0.0114403	-0.519394	-0.784411	-0.36165	0.17293	0.716862	0.479465	-1.93329	0.221131	-0.336751	-0.15554	-0.977722	0.062006	-0.330676	0.312343	-0.180857	0.225128	-0.949903
255	-2.04963	1.80847	-2.95649	-0.204452	-3.08084	0.156943	-3.12956	-1.29875	-2.04621	-0.295819	-2.95247	0.211762	-2.17998	-1.64779	-2.83537	-2.55634	-1.88688	-0.411603	-2.33448	0.261246	-2.96361	-2.96849	-3.56344	-2.74339	-1.88005	-2.46339	-2.67565	-1.37275	-2.89261	-0.727086	-2.54833	-2.4224	-2.53381	-2.23539	-0.813801	-2.47722	-2.14131	-2.41306	-1.36096	-3.13651	-1.48467	-0.895547	-0.237649	-0.74873	-0.418694	-2.86221	-2.56434	-1.15979	-0.376163
256	1.22883	-2.74769	1.45495	-0.318913	0.924992	-0.341983	0.120141	-0.611805	0.358105	-1.05049	0.284444	-1.30054	0.102384	-0.144025	-0.443618	-0.0980573	1.04713	0.646445	0.260482	-0.643547	0.587233	-0.0640416	-0.00967789	-0.486382	0.76374	-0.74259	0.758211	-0.257312	0.335464	-0.228112	-0.161989	0.599084	-0.105983	-0.634854	-0.58828	-0.0514469	0.66863	0.926253	-0.815773	0.0789413	-1.07152	0.176034	-1.23527	0.391086	-0.366515	0.129879	-0.0876579	0.702721	-0.203138
257	-1.66079	0.890594	-1.57465	-0.247848	-1.5769	0.499148	-1.41848	-1.07102	-1.06955	-1.18212	-1.63555	-0.117587	-1.23034	-0.741814	-2.1507	-0.856166	-1.10573	-1.6691	-1.00948	-0.5497	-1.75534	-1.47331	-0.895687	0.602402	-1.10574	-0.440194	-1.52905	-0.27282	-0.616295	-0.334685	-1.53041	-1.08187	-0.229144	-0.0992403	-1.07266	-1.37245	-2.10327	-1.87996	1.24752	-1.17074	-0.545259	-0.995534	-0.205274	-1.70542	-0.919059	-2.32952	-1.54666	-1.69178	0.0410385
258	-2.71487	0.314314	-0.66329	-0.184693	-1.21175	0.658423	-0.699352	-0.40602	0.0572672	2.12664	0.280628	0.203668	-2.68413	-0.301235	-0.395749	0.427539	-1.43165	0.987382	-0.785323	-0.0544991	-0.865984	-0.395832	-0.959474	0.816528	-0.87558	1.23782	-0.773226	0.269685	0.461612	-0.226141	-1.22585	-0.497737	0.717653	0.904289	-0.466787	-1.32458	-3.66949	-1.01204	1.79002	-0.168997	-0.0969019	0.0516748	0.722097	-2.29934	-0.385096	-1.18048	0.676075	-1.17362	0.12682
259	-0.811509	1.70653	-1.2913	0.575125	-0.775218	1.4265	-1.02388	-0.0630989	-0.445368	-0.499855	-0.86472	0.925299	-2.35219	-0.733623	-1.08103	-0.581142	-1.04623	-0.857279	-0.142046	0.339001	-0.970396	-0.478641	-0.306721	0.870142	-1.05807	0.0891514	-0.855492	0.494004	-0.633275	-0.504466	-1.12309	-0.691828	-0.0072298	1.28417	-0.400345	-0.884678	-1.16553	-0.462868	1.91595	-1.37714	0.00785065	-0.428604	0.849841	-1.13841	-0.337924	-1.64551	-0.432743	-0.853032	1.05512
260	-2.92206	-0.629597	-2.03412	-0.726572	-2.79931	-1.2052	-2.65479	-0.693565	-1.18444	-2.3134	-1.29354	-0.853032	-2.47589	-1.00069	-2.47379	-0.94198	-2.77648	-2.32442	-1.77687	-0.945595	-2.50234	-1.35426	-0.834461	0.0161338	-2.48989	-0.693297	-0.908124	-0.452327	-1.00789	-0.971142	-2.33782	-0.932812	-0.455642	-0.791042	-1.05903	-0.657813	-2.79967	-2.32081	-0.441113	-2.27211	-1.00836	-2.71485	-0.613279	-2.78002	-1.35407	-2.86139	-2.20431	-2.40218	-0.533786
261	2.23868	1.05217	1.58915	3.55565	1.59508	3.4653	1.53179	2.03002	2.20311	1.30228	1.77776	3.21407	1.55335	3.10123	1.59521	3.14148	1.78558	1.95204	2.49256	3.13426	1.92703	2.0414	2.1217	3.43775	2.02088	4.09573	2.12682	4.78881	1.96782	2.6313	1.48997	3.20121	3.97383	3.24163	1.87044	1.34553	1.76395	1.79516	3.54762	1.63982	2.30447	2.733	4.02469	1.88608	2.60031	1.22352	1.5577	2.04361	4.64955
262	0.273206	0.997766	0.891985	2.05158	1.27702	1.58801	-2.37643	1.32983	2.07673	1.92072	1.45299	2.01802	-0.0313749	0.987243	0.820977	1.97745	1.78432	1.45437	0.121465	1.42927	0.738154	2.94914	0.222896	2.46493	1.25558	1.68352	0.864668	2.26796	1.44359	2.06359	0.533333	1.62293	1.9995	0.700712	0.672189	0.227905	1.14809	0.810266	3.0591	0.919678	2.08726	1.39698	2.20669	0.0624237	0.557907	-0.358092	0.431078	1.42805	1.88613
263	2.42319	3.73701	3.2604	3.86255	3.3689	3.75915	2.79353	3.10007	2.44061	3.37114	2.5979	5.04515	2.60928	3.49669	1.73366	3.42644	3.3302	3.66179	3.05149	3.04169	3.74057	2.98043	3.33067	4.50066	2.2878	4.83784	2.73244	5.21384	3.13855	3.39122	2.50431	3.26489	4.44392	2.13398	2.74121	2.39588	2.62592	2.7199	3.97145	2.38354	7.54963	3.52101	4.32539	1.87677	3.26977	2.17973	2.33619	2.28084	3.67667
264	0.567099	0.686413	0.246828	1.5686	0.534794	1.49282	0.21134	0.551494	0.563788	0.396818	0.281681	0.935146	-2.18009	1.14681	0.147183	1.33843	0.0586386	0.697096	0.831818	1.33204	0.11259	0.69084	0.73208	0.748697	0.225198	2.3276	0.44419	2.26807	0.430376	0.859913	-0.288417	0.855212	3.63701	-0.543781	0.878384	0.568746	0.300895	0.643895	1.75202	0.458938	1.36657	0.969628	2.2666	0.236543	1.27433	-0.240529	0.373525	0.378173	3.54986
265	4.34435	8.24345	4.11799	6.10759	3.99034	6.5089	4.64626	4.75576	4.79168	4.34942	4.56645	5.41162	4.35782	5.54215	3.5931	5.80739	4.53471	4.68286	5.78719	5.82401	3.93144	4.68586	5.17746	4.58877	2.6567	6.11895	4.21835	7.50112	4.40979	5.8622	4.14732	4.37722	8.14454	4.22488	5.02055	4.99167	3.92641	4.50729	6.09073	4.89331	5.80575	5.20035	8.03336	4.38112	5.42128	3.68217	4.22748	4.56064	8.15363
266	-1.39853	-0.220001	-2.03709	0.817956	-1.58638	-0.696506	-1.75245	1.48239	-3.68201	-1.377	-1.85306	-1.1382	-2.12341	-1.89447	-1.741	-2.15892	-1.5993	-1.57193	-0.911541	0.353614	-1.67168	-2.47127	-1.80604	0.376646	-0.97674	-2.50593	-1.39999	-0.740728	-1.34475	1.1892	-2.75383	-1.49476	-0.606744	-2.05364	-0.0362921	-0.237468	-1.74221	-2.05213	0.415668	-2.69073	-0.760903	-1.8853	0.374808	-2.01345	-0.620526	-1.79886	-0.741408	-0.109715	0.329288
267	-3.1088	-0.595935	-0.747473	-0.189616	-2.38301	-0.424314	-2.35249	-3.43771	-2.7176	-0.179835	-2.86512	-1.31913	-2.84085	-0.678282	-2.69456	0.161592	-3.1175	-0.405642	-2.61292	-0.626583	-2.11478	-0.103683	-2.73784	-0.284984	0.097105	0.0683136	-2.02779	0.831186	-0.152388	-2.32716	-0.796331	-2.47928	1.03599	0.358378	-3.2031	0.765972	-2.09391	-2.81454	0.844679	-3.00994	0.29669	-3.31843	0.72082	-2.95568	-0.43852	-2.63663	-2.88343	-2.15688	0.995205
268	0.557996	2.02686	0.221893	1.90894	0.484518	1.99568	0.213455	1.18114	0.233562	0.529745	0.669929	1.91917	0.0596857	1.01219	-0.0290189	0.814418	0.243183	0.859848	0.862723	1.6199	0.568273	0.766092	0.853209	2.0986	0.514705	1.04125	0.366885	1.39555	0.535101	1.02774	0.0681491	1.09066	1.53921	1.45139	1.00716	0.275554	0.284554	0.548295	2.2459	0.218203	0.929441	1.09197	1.84293	0.394639	0.835326	-0.364022	0.107811	0.614178	1.91594
269	1.64816	-0.458835	2.61464	2.04984	3.16135	0.363956	1.49968	1.69898	2.72812	0.0566397	1.48205	0.815087	1.61362	2.66552	3.31518	0.273664	2.61933	2.73752	1.44465	0.536076	1.25893	0.767311	1.6135	1.58927	2.50412	-0.119895	2.95469	0.230082	3.34561	2.82098	3.19684	2.54386	1.81135	1.48875	0.765893	2.18259	2.35323	1.67437	1.07062	1.68781	1.44729	2.5401	0.266851	2.57982	-0.730955	0.986183	1.86954	2.96134	-0.211736
270	2.79031	3.41375	2.70799	3.95368	2.91064	3.84421	2.41322	3.36084	2.76528	3.01555	2.64882	3.55293	2.14954	2.98085	2.0465	3.11358	2.51941	3.0364	3.19752	3.83141	2.57739	2.79775	2.95888	4.22989	2.75839	3.19793	2.83402	3.63353	2.87704	3.35225	2.3585	3.22989	3.84847	3.02019	2.98076	2.15951	2.57139	2.49677	3.60248	2.00871	2.9146	2.94862	3.75395	2.59334	3.19505	1.65039	2.06663	2.80893	4.2385
271	2.31039	-3.26804	2.66433	1.07171	2.62646	0.365459	1.56859	1.17802	1.66176	1.03887	1.46359	-0.31007	1.83165	0.76768	1.50778	1.3479	2.15828	1.79783	1.53719	1.35655	2.27209	0.621075	1.72922	1.13226	2.53112	0.960867	2.16919	0.732088	2.06553	1.85346	1.59147	2.05296	0.677598	0.986746	0.676549	1.17009	2.23213	1.83878	0.681303	1.50022	0.728419	1.80706	0.383554	1.20664	0.235347	1.42479	1.39005	1.72874	0.633797
272	0.527487	1.77007	0.653422	3.14785	0.817685	1.83758	0.365462	2.56394	0.517558	1.81793	0.780968	2.77672	0.68932	0.304704	0.71349	0.0351567	-2.41479	1.42336	0.684093	1.63689	0.86898	0.366183	-0.420315	2.07807	0.95448	-0.129426	0.937485	2.19704	0.482156	2.09653	-0.376197	0.85645	0.988426	0.474681	1.85199	0.895659	0.438497	0.497374	1.90549	0.283859	1.03411	0.57687	1.46019	1.16831	1.67224	-0.0819101	0.71056	1.45627	2.4454
273	-0.984949	-0.00185204	-1.04815	0.843704	-2.3212	0.0330505	-1.01941	0.579443	-2.95105	-0.475234	-0.701487	0.348873	-0.6822	-0.64418	-2.59968	-1.36877	-0.723701	-0.719934	-2.76987	0.148939	-3.26651	-1.13782	-1.0092	0.375514	-0.833277	-1.18043	-0.792044	0.187613	-1.24683	0.752505	-3.11481	-0.696772	-0.388066	-0.857984	-0.172686	-3.01528	-2.66707	-3.25772	0.17382	-2.45556	-0.637055	-0.576303	0.347036	-0.798271	-0.203962	-2.00782	-2.71614	-0.354825	0.343108
274	2.0563	2.92393	1.1682	2.82831	1.8728	2.96127	1.13024	1.76205	1.4675	0.841894	1.31282	2.6319	1.1881	2.05837	1.47925	2.14282	1.98465	1.69627	1.8291	2.75874	1.71663	2.12722	1.68004	2.718	1.61334	3.04326	1.66148	3.89419	1.8325	2.03888	1.30545	2.56353	2.76222	2.30312	1.25519	0.861089	1.37238	1.27701	3.12165	1.08389	2.28838	1.96859	3.32759	1.60671	2.15132	0.977862	0.672612	1.90088	3.74311
275	0.147512	-2.71121	-0.313747	-0.628829	-0.174892	-1.91892	-0.738444	-0.539968	-0.248775	-1.44536	-0.695519	-2.16707	-0.418261	-2.78433	-0.348566	-2.24748	-0.677349	-0.721169	-0.546369	-1.12755	-0.430094	-2.48131	-0.290637	-1.1859	-0.352161	-1.38134	-0.690905	-1.25904	-0.331491	-0.678197	-0.298262	-0.283844	-1.76377	-1.52075	-3.77261	-0.574075	-0.581895	-0.141582	-1.76371	-0.379506	-1.48892	-0.975806	-1.73314	-0.870497	-1.475	-0.476506	-0.283013	-0.540883	-1.94948
276	-1.43286	-0.604049	-1.92678	-0.751956	-3.26356	-0.107168	-2.61875	-0.621501	-2.46054	-1.44818	-2.47351	0.325099	-2.63323	-2.67583	-2.43613	-1.73783	-2.25429	-0.606726	-2.73283	-0.907809	-2.46251	-2.42091	-2.73996	-0.781498	-1.99976	-2.56971	-3.56915	-2.0869	-3.11171	-1.89965	-3.62871	-3.3176	-1.07812	-1.71187	-0.479979	-2.6643	-2.63117	-2.34706	-0.739592	-2.74622	-1.04296	-1.05879	-0.867073	-1.37615	-0.87926	-2.70172	-2.05521	-0.695235	-0.412493
277	-3.08676	-0.653543	-0.0587916	-0.653976	-0.864823	-0.143174	-2.32138	-0.646437	-1.02428	-0.362855	-0.968616	0.176044	-3.03842	-0.121369	-1.45178	-0.31269	-0.401733	-0.479102	-3.38003	-0.293762	-0.85779	-0.931731	-3.42719	-0.738325	-0.298206	-0.293317	-0.679742	-0.168952	-0.573669	-0.752224	-0.552806	-0.999915	-0.246139	-0.372114	-0.546236	-3.03263	-2.71264	-3.10889	0.100861	-1.88547	-0.551921	-0.463309	-0.185199	-3.09784	-0.409626	-2.6153	-2.05756	-0.183271	-0.0479765
278	1.33957	3.5515	1.09207	2.36055	1.47367	2.64956	0.77717	1.43431	1.447	1.17972	1.09433	4.06789	0.628681	1.95254	0.951307	2.29349	1.52698	1.94432	1.34448	2.25049	1.32946	1.29863	1.23451	2.5789	1.11687	1.96025	1.2489	2.80675	1.96937	1.84836	1.29805	1.99441	1.83729	1.85133	1.36105	1.10456	1.46856	0.830361	2.79041	1.40865	1.88032	1.85288	3.11621	1.49205	1.76768	0.593908	1.08819	1.64738	2.48683
279	0.477581	1.3447	0.326921	1.47779	0.334981	1.13838	0.23221	1.26074	0.315512	0.517739	0.103567	0.91229	0.153951	0.812747	0.0411458	0.637479	0.336416	0.483644	0.384828	1.21371	0.376777	0.309325	0.359765	1.63812	0.339328	0.75293	0.502733	1.04723	0.403378	1.54387	-0.00767183	0.559868	0.88483	0.289454	0.719077	-0.274595	0.306231	0.0858631	0.892438	0.226848	0.534981	0.547172	1.00439	0.280496	0.607859	-0.404122	0.304087	0.597085	1.10043
280	-2.65899	0.163192	-3.39866	-0.0817356	-2.59806	-0.193208	-3.45003	0.254294	0.297053	0.579429	-2.39847	0.777262	-1.87093	-2.57947	-1.88033	-0.253961	-0.179243	0.0196276	-3.62128	-0.503162	-3.00241	-2.92987	-2.3676	-0.278548	-0.426075	-0.27949	-0.359003	-0.00627899	-2.44524	0.179282	-0.553157	-0.617668	-0.245608	-0.0352383	-0.231186	-2.55511	-1.38023	-1.43093	0.241091	-3.5439	-0.43541	-0.0417128	-0.340587	0.21767	0.0433807	-2.18375	-2.28687	-0.0453362	0.105545
281	-0.694217	1.09393	-0.42791	0.817367	-0.454756	1.0138	-0.357896	0.247825	-0.290239	0.115337	-0.430897	0.869253	-0.475703	0.4172	-0.730896	0.0632319	-0.549015	-0.151225	0.17451	0.583945	-0.536867	-0.249425	0.118777	0.592307	-0.358998	0.263722	-0.155321	0.93313	-0.120135	0.0226383	-0.544044	-0.00560665	0.768608	-0.172132	0.125104	-0.35078	-0.551075	-0.253185	0.978212	-0.501035	0.418483	0.147637	0.649488	-0.241569	0.119097	-0.921603	-0.64981	-0.178483	1.02495
282	1.34664	1.29374	1.06376	2.17361	1.66883	2.00582	0.418855	1.44033	0.849373	0.779748	1.71999	2.04806	1.09004	1.7302	-0.423453	1.71511	1.61037	2.10685	0.606365	2.05485	0.984534	2.29107	0.408869	2.17799	0.311316	2.82699	1.761	2.97138	2.14502	1.28388	0.598813	1.66156	3.45746	0.331302	1.46102	0.231299	1.094	0.89727	2.12613	0.375488	1.38037	1.72094	2.67074	2.05004	1.18765	0.358486	0.701018	0.910142	3.84423
283	0.372972	-0.134317	-0.112538	1.72677	0.0182443	0.825578	-0.759838	-0.24262	-0.113836	-0.557828	-0.033165	0.656164	-0.6462	-0.0977631	-0.349057	0.374571	-0.00662422	0.0984497	0.35648	0.990558	-0.0598288	-0.645631	-0.180928	1.2925	-0.0978041	1.6472	-0.151371	2.72977	0.509228	1.0227	-0.250624	1.06813	1.17569	-0.427126	-0.290143	-3.0986	-0.252308	-0.256659	0.561468	-0.488067	0.0961552	-0.196272	1.95267	-0.0310926	0.686955	-0.508349	-0.645061	-0.352858	2.11115
284	0.411408	-1.59184	-0.880898	-3.09364	-0.267574	-1.98388	-3.01555	-1.84751	0.780322	-2.94731	-2.12342	-2.54365	-1.4683	-2.68518	0.154073	-1.87365	-0.60713	-0.857728	-1.18837	-2.58126	-0.492728	-2.67763	-1.6539	-2.00619	-1.50349	-1.86003	-0.816468	-1.778	0.0197268	-1.48763	1.27771	0.275317	-2.24625	-3.01181	-3.83577	-1.33828	0.157108	-0.470551	-1.13154	0.317946	-2.30031	-1.69993	-1.77281	-0.676967	-1.77825	-0.135985	-0.442599	-1.34152	-2.4293
285	-1.99299	1.34478	-1.58966	-0.780494	-1.79793	0.247862	-1.54432	-0.868811	-3.13011	-1.3171	-2.24707	0.164679	-3.17818	-2.35335	-2.53671	-3.21216	-0.303083	-1.36749	-2.9459	-0.620685	-1.87621	-2.23953	-2.67595	-0.847041	-2.81988	-2.72057	-3.21572	-0.736573	-2.22811	-1.02608	-1.94702	-1.23862	-1.2505	-1.38412	-0.915321	-3.00449	-3.00774	-2.98824	-0.250403	-3.39111	-0.431183	-0.440809	-0.274874	-2.34085	-0.968797	-2.86068	-2.59052	-1.27687	-0.636838
286	-0.062345	-2.76035	-0.164963	-0.0982132	-0.692412	-1.24138	0.0488558	-0.45466	-0.290981	-0.216844	-0.402216	-1.67001	-0.440111	-0.646004	-0.81382	-2.36645	-0.378997	-2.93138	0.164442	-0.0106606	-0.33007	-3.08146	0.0258713	-0.82016	-0.613864	-3.43459	-0.156921	-2.64805	-0.32629	-0.47786	-0.0580335	-0.718125	-1.22169	-0.732926	-0.44649	-0.0130177	0.355685	0.475196	-1.48587	-0.479836	-0.754129	-0.0151081	-1.57292	-0.613354	-0.427559	-0.694076	-0.989369	-0.861353	-1.25034
287	-1.59728	0.0548658	-2.62831	-0.346777	-1.7894	-2.31784	-2.84397	-0.308179	-2.07445	-0.608488	-2.82778	-0.779636	-1.61051	-2.38713	-1.64387	-2.45498	-3.46715	-2.81534	-2.49602	-0.966524	-2.04044	-1.05916	-2.60006	-0.87474	-2.72223	-1.09076	-3.79382	-0.967001	-2.18462	-0.456825	-2.51389	-2.29642	-1.29436	-2.68838	-0.587511	-2.61623	-1.02629	-3.04899	-1.07428	-2.21117	-1.05583	-1.60837	-0.799083	-0.759244	-3.47513	-2.68848	-1.12911	-0.968189	-0.901824
288	1.5198	3.03328	1.65429	2.82589	1.4053	2.76589	1.48893	2.37669	1.93582	1.63701	1.94373	2.43266	1.22793	2.46893	1.15459	2.27774	2.49703	2.09582	1.94462	2.22737	1.65803	2.16325	1.6453	2.65346	1.88872	2.58887	1.80426	2.63819	2.12037	2.27024	1.51466	2.27864	2.70651	2.38356	1.79317	1.05882	1.171	1.55706	2.88464	1.29289	3.0398	1.90409	2.92828	1.79677	1.89088	0.802861	1.35383	1.76974	2.55777
289	0.527947	-1.84726	-3.01874	0.881901	-3.54265	0.00254536	-2.40311	0.834935	-0.443659	0.684784	-1.71832	1.09757	1.04505	-2.8484	-2.30432	-0.212427	0.241857	1.39675	-2.55624	-1.23995	0.315162	3.43797	-2.86653	-0.124403	-2.69801	0.32679	-3.36039	1.30836	-0.311337	1.05487	-2.80447	0.544171	0.885762	0.355341	1.39116	-1.95399	-3.19228	-2.89932	-0.509979	-2.40149	-2.67872	-3.37866	0.357127	2.36672	0.583723	-0.0908289	-2.3758	-2.22661	1.62957
290	-0.326458	1.22953	0.189894	1.66723	0.276149	0.945386	-0.651753	1.52146	-0.106519	0.656866	0.0308666	1.13991	-0.0879869	0.653194	-0.253859	0.127786	0.525013	0.550556	-0.623499	1.03461	-0.170046	-0.206075	-0.506438	0.841625	0.299391	-0.153563	0.0729737	0.564167	0.119814	1.35738	-0.333707	0.197443	-0.0865393	-0.520724	0.842292	-1.83709	0.0383425	-0.336716	0.917215	-0.393479	0.313399	0.559221	1.03367	0.477834	0.680128	-0.46833	0.0496788	0.722992	1.33151
291	-0.0531316	-4.14318	-1.09382	-2.46266	-0.85732	-2.39604	-1.09644	-2.3465	-1.20498	-3.57826	-1.50027	-2.62239	-0.974457	-1.79025	-0.936026	-1.40899	-1.02462	-1.35498	-1.36693	-1.79117	-0.180769	-2.95663	-1.18135	-1.91099	-0.376084	-0.977183	-1.21011	-1.54022	-1.36	-1.13441	-1.22656	-0.353415	-2.18086	-1.90454	-2.24094	-1.09132	-0.880313	-1.13905	-1.55275	-1.40219	-2.90624	-0.880128	-2.40498	-1.40198	-1.5924	-0.703578	-0.793577	-1.00651	-2.6282
292	0.400825	1.65764	0.389371	2.06188	0.341453	1.5627	0.115559	1.27453	0.421068	1.31509	0.684421	1.9299	0.0102062	1.30064	-0.210001	0.839164	0.123384	0.97623	0.489255	1.50153	-0.0450325	0.317691	0.323558	1.40667	0.342285	0.788288	0.732831	1.51128	0.631696	1.4361	-0.279521	0.757987	0.617032	0.385289	0.643628	-0.570352	0.493996	0.263802	2.10364	-0.36552	0.11257	0.848713	1.10878	0.829391	0.750278	-0.737346	-0.0352449	0.988138	1.67003
293	0.376478	-0.0989532	0.235291	1.23573	0.0804038	1.5681	0.230367	0.806533	0.566492	0.358341	0.880302	1.12068	0.11564	1.01538	-0.170483	1.39166	0.264568	0.483252	0.472663	1.098	0.155717	0.979792	0.44466	0.891745	0.278547	1.76595	0.501318	1.98922	0.82048	0.837869	-0.085444	0.630463	2.01484	0.740518	0.635652	0.33645	0.152943	0.221556	1.86565	0.13812	0.924717	0.753778	1.51379	0.253887	1.06939	-0.151372	0.30877	0.180348	2.3428
294	-2.65049	-0.709203	-2.99427	-0.772931	-1.43328	-0.397825	-2.35424	-0.903801	-3.03446	-2.29093	-3.34677	-0.584208	-3.01095	-0.502865	-2.05949	-1.19988	-0.771111	-2.82162	-2.80937	-0.177317	-2.96631	-2.52003	-1.05713	-1.0696	-3.0495	-0.165094	0.152595	0.00120926	-1.20479	-1.0021	-2.12306	-2.90296	-0.198971	-0.559367	0.24309	-2.8311	-2.85302	-2.61364	-0.17675	-2.38889	-2.66831	-0.68951	-0.19747	-2.4567	-0.628158	-2.57807	-2.25349	-1.28471	-0.0592346
295	-1.73219	0.9088	-1.64616	0.70986	-2.83754	1.61821	-0.518278	-0.177047	-1.63414	-0.218774	-2.3431	0.769105	-1.17608	0.470967	-2.92946	-0.322235	-2.21862	-0.353609	-1.33243	0.427533	-2.37741	-1.2816	-0.565707	-0.174777	-2.08976	-0.859923	-2.68516	-0.694905	-2.5902	0.470145	-1.51231	-1.21307	-3.80005	-1.44772	0.115442	-2.70686	-2.50548	-2.32864	-0.605454	-2.45912	-0.670132	0.72858	0.207566	-0.854954	-0.34222	-2.14144	-0.135042	-0.0834317	-0.480554
296	-2.35629	-1.44261	-2.37489	-1.05538	-3.14078	-1.55866	-2.45105	-1.25279	-2.0179	-2.63478	-3.33843	-0.979314	-1.63519	-1.10576	-2.30713	-1.31834	-1.9056	-2.24148	-2.89817	-1.38679	-2.58241	-3.68042	-2.47235	-1.37308	-1.64561	-0.559634	-3.28899	-0.530655	-1.8521	-1.48507	-2.56774	-1.80017	-0.287896	-2.19136	-3.10911	-2.68444	-2.68992	-2.16923	-1.25951	-2.41336	-1.53067	-2.66017	-0.9717	-2.79486	-2.77223	-2.39241	-2.33271	-2.83599	0.00125217
297	-0.358412	0.229932	-0.190338	1.02259	-0.185702	1.4051	-0.181741	0.807702	-0.126919	-0.0935621	-0.328195	0.850252	-0.237608	0.548112	-0.494586	0.282738	-0.193663	0.268677	-0.358094	0.85042	-0.276714	0.174017	0.167697	1.14315	-0.523064	0.491309	-0.226552	1.07639	0.0940876	1.20388	-0.691777	0.192317	0.594365	1.70557	0.38915	-0.769564	-0.553073	-0.60822	0.999092	-0.796659	0.21906	0.603484	1.20172	-0.664239	0.317489	-0.48127	-0.660454	0.322716	1.07089
298	-2.88458	-4.01495	-2.30769	-0.890153	-2.67897	-0.0510263	-1.50031	-1.0223	-2.06772	-1.48879	-1.6952	-0.0710497	-3.90992	-0.655139	-2.31916	-0.892518	-2.56105	-1.60738	-0.625756	-2.94345	-2.17957	-0.800113	-1.969	-3.21828	-0.862032	-0.0443001	-3.32649	0.379464	-2.53807	-0.344207	-3.17614	-1.95766	-0.324847	-1.8136	-0.833011	-2.92636	-1.89506	-1.20362	-0.105461	-1.62749	-0.915962	-3.31538	0.27237	-1.06296	-0.561589	-2.67136	-1.02348	-1.42202	0.306532
299	1.07729	-0.571103	2.66152	0.795571	1.11268	-0.39462	1.54159	2.73377	1.41875	1.42577	3.07632	-2.03992	1.26883	-2.86919	0.355443	-0.597727	1.4404	1.07013	2.0865	1.21018	1.40212	1.17395	1.78696	1.75973	1.56929	-0.839562	2.4174	-0.334376	1.74822	1.37291	1.46827	2.15626	-0.152557	0.857856	0.990017	1.39468	1.47768	2.04001	0.067049	0.889145	1.0894	0.95224	-1.44811	0.274809	-0.714271	0.448986	0.258808	0.792895	-1.90743
300	1.04378	-1.36258	0.776957	-0.113289	0.566494	-0.315277	0.420355	0.0848808	0.297477	-0.092	0.373334	-1.08081	0.489614	-0.564744	0.271081	-0.133469	0.48336	0.20379	0.558999	0.156646	0.766985	-0.389429	0.605598	0.135952	0.838734	-0.501776	0.975777	-0.0439653	0.35642	0.390147	0.219204	0.644191	-0.116138	0.32941	-0.0954962	0.258548	0.491507	0.675198	-0.0388689	0.418856	-0.394605	0.337089	-0.76038	0.0707979	-0.277257	0.146682	0.295274	0.506586	-0.212077
301	2.94217	5.52766	3.01331	3.71792	3.53515	4.02565	1.85636	2.65257	2.78252	2.27296	1.84761	5.08387	2.70717	3.87554	1.83279	3.68492	2.72229	3.9507	3.36314	3.59773	2.5462	3.40165	2.60696	4.03148	2.75599	3.43371	2.57809	4.56162	3.57293	3.05962	1.88752	3.83832	4.04523	2.48472	2.2291	2.4233	2.68725	2.47102	4.32973	2.73151	3.2703	3.57469	4.61643	2.80076	3.01373	1.33564	2.42878	3.31379	4.35823
302	1.90375	0.0982742	2.45849	1.47396	2.86699	1.19917	1.81654	1.117	1.51312	0.517642	1.38903	-0.533721	2.17268	-0.142462	2.05375	2.02628	1.83359	1.18175	2.2977	1.83175	2.13779	-0.597556	1.75651	2.39135	2.50493	0.866047	2.36802	1.01178	1.96318	1.31573	2.10562	2.18173	0.76403	1.40105	1.2118	1.86574	2.18917	2.2752	2.07315	1.49238	0.215634	1.76441	1.365	1.74471	1.36155	1.62117	1.46362	1.19922	0.272922
303	-0.331995	-0.681216	-0.890318	2.60476	-1.79618	0.182821	-0.785171	-0.586926	-1.47171	-0.696706	-3.65453	-0.604505	-1.04849	-1.12182	-1.85968	-1.22046	-0.59585	-1.42241	-0.829753	0.334589	-2.74379	-1.28339	0.243154	1.94662	-0.431452	-1.2762	-0.719349	4.06345	-0.886744	0.407896	-0.255374	2.34315	-1.26201	-0.662265	-0.215797	-2.63912	-2.21898	-2.34869	0.669034	-0.998276	0.319784	-0.34404	2.89088	-1.2926	-0.032196	-0.938402	-0.965675	-0.247506	1.94085
304	4.21363	2.57736	4.23932	3.38163	4.20885	3.58786	3.7361	3.05491	3.78576	3.5559	4.10291	3.25951	3.83165	3.38964	3.54661	3.53306	3.93089	3.32082	3.97029	3.95164	3.87991	2.06382	4.03085	3.40819	4.05753	2.67195	4.31107	2.38258	4.22144	3.47624	3.68804	3.73746	2.183	3.41097	3.43047	3.39682	4.13972	3.90467	3.6792	3.31874	2.58214	3.82902	2.72575	3.46267	2.89642	3.4001	3.40772	3.77896	3.03671
305	-3.09453	-0.145414	-1.77158	-0.254529	-1.56049	-0.426969	-1.99794	-0.78969	-1.45923	-1.05998	-1.04581	-0.450974	-2.80351	-1.31077	-2.21015	-1.3282	-1.42483	-1.51542	-1.60966	-0.722072	-2.5838	-1.93201	-1.55636	-0.216763	-1.67268	-0.712648	-1.71492	-0.912116	-1.48513	-1.11546	-2.66921	-1.32561	-1.14105	-1.62577	-0.761431	-2.66132	-1.3079	-2.56857	-1.60408	-1.05431	-1.01282	-1.24815	-0.847184	-1.35508	-1.3129	-1.92741	-1.90244	-1.56906	-0.898651
306	-2.84078	-1.24415	-1.75832	-0.898778	-1.57575	-0.47915	-2.61342	-1.17735	-1.09544	-2.08136	-2.39728	-0.372704	-2.28525	-0.221674	-2.26449	-0.613791	-0.795751	-1.51428	-1.40314	-0.794009	-2.06508	0.0942273	-3.5769	-1.12637	-1.7902	-0.912511	-3.33069	-1.01115	-1.29581	-1.53197	-2.13876	-2.19004	-1.59427	-1.23042	-1.42064	-2.59309	-1.19881	-2.68209	-0.604296	-2.89019	-0.294552	-2.06694	-1.09061	-1.769	-0.942266	-1.72308	-1.76536	-1.08891	-1.27786
307	2.44229	4.84366	3.04618	4.58166	2.91251	4.25465	2.33078	3.75955	2.23808	2.77941	2.59406	4.43276	2.20695	1.92854	1.58834	3.08199	2.71976	3.29283	2.60059	3.53565	2.49538	2.63434	2.92976	4.98886	3.05234	2.21236	3.06049	4.19051	2.74059	3.06708	2.41926	2.93046	3.74317	4.00094	3.11593	2.21688	2.45305	2.09866	4.97174	2.23092	3.19644	2.42763	4.50092	2.44069	3.24559	1.65169	2.55125	3.34986	4.98612
308	-0.723007	-2.36882	-0.75567	-3.47727	-1.33111	-2.12808	-1.24724	-2.74992	-1.35017	-1.68544	-1.22986	-2.13151	-1.30812	-1.93976	-1.17542	-1.56924	-0.747259	-1.66777	-1.42763	-1.62004	-0.999218	-2.31451	-1.68071	-2.99661	-0.626019	-2.68058	-0.969875	-2.1398	-1.29142	-1.76865	-1.26144	-0.810097	-2.1489	-2.41069	-2.13951	-1.33212	-1.0368	-1.43161	-1.79631	-1.60286	-2.0793	-1.47896	-1.8914	-1.49529	-2.23692	-1.06732	-1.5585	-1.18481	-2.09886
309	-2.98688	1.29599	-3.19506	0.344675	-3.06031	-0.563215	1.68655	0.028595	-2.23717	0.15577	-1.11466	-0.163049	-2.42479	-1.06437	-2.349	-2.16197	-3.29941	-0.830965	-2.7773	-0.359179	-2.66368	-2.19833	-1.2658	-0.322608	-1.93069	-1.81337	-1.08852	-0.754301	-1.66002	0.0829287	-2.41875	-0.910332	-0.889911	-1.90208	-0.402391	-2.25085	-1.96097	-2.42451	-0.298261	-1.63064	-0.532627	-0.748728	-0.336277	-0.966398	-0.724879	-1.89054	-2.69352	-0.833507	-0.442353
310	-2.96833	-0.912123	-2.91162	-0.553093	-1.61315	-0.676488	-2.53068	-0.725908	-3.23807	-3.16513	-2.45042	-1.06311	-2.41823	-2.3768	-2.81008	-2.51199	-2.80079	-1.32254	-1.92134	-0.585535	-1.84934	-3.19788	-1.12852	-0.963994	-2.52553	-2.52527	-2.38047	-0.89224	-1.17701	-0.144329	-3.67428	-2.30047	-1.52721	-1.75244	-1.31245	-3.67178	-2.60502	-2.87218	-0.850877	-2.06452	-1.18638	-2.39917	-0.438634	-2.73868	-1.56851	-2.21658	-2.78802	-1.87295	-0.598111
311	-0.667295	-2.59571	-2.23429	0.0629988	-2.39261	-0.144255	-2.68342	-3.11583	-2.75226	-2.49687	-0.218494	-0.0367222	-2.46497	-0.614087	-3.01897	0.0366263	-2.63361	-2.16785	-2.15883	-2.09408	-3.42557	-0.749896	-2.29222	0.942111	-2.1451	0.15992	-2.31544	0.343999	-0.892678	-0.0258284	-0.988688	-0.0619001	-0.0239916	-0.0458508	-2.18859	-2.92964	-2.10144	-2.68114	0.671651	-1.95105	-0.23183	-2.44974	-2.14847	-0.397463	-0.497992	-3.10527	-1.11585	-0.274821	0.570393
312	-0.865034	-2.95533	-1.62189	-2.65039	-1.01969	-2.76244	-2.24585	-2.50096	0.766361	-2.76998	-1.60606	-2.68563	-1.32433	-2.61555	-0.8813	-2.2162	-1.7851	-3.10538	-0.748991	-2.19877	-1.28087	-2.05363	-1.20353	-2.77466	-2.19089	-3.14068	-1.90531	-2.48578	-1.67139	-0.778401	-1.61962	-2.25862	-2.28103	-2.84091	-2.28226	-1.27632	-0.700075	-1.0476	-2.08394	-1.28674	-2.23076	-0.913364	-2.95965	-1.46444	-0.776966	-1.37747	-1.65722	-1.73687	-2.96778
313	-2.86794	-0.197888	-2.20071	-0.258286	-2.25633	-0.39058	-2.55118	-0.54505	-3.08905	-2.93373	-3.03072	0.238651	-1.87687	-0.789688	-2.93651	-3.20299	-2.71383	-2.43753	-2.69458	-1.1109	-2.63716	-3.64675	-1.26676	-0.605217	-2.7242	-2.35098	-1.03379	-0.916361	-3.09238	-0.568572	-3.22917	-1.0911	-1.31061	-1.80709	-0.239324	-3.11861	-2.42962	-3.41459	-0.183398	-2.82774	-0.0896387	-0.723904	-0.740503	-3.28304	-0.742969	-2.06513	-2.95589	-0.686958	-0.669025
314	-2.45674	1.86632	-1.72453	0.646543	-1.82668	0.047883	-0.767512	-0.00688076	-1.21487	0.639355	-0.684973	0.891364	-2.14975	-1.29164	-1.48206	-0.982447	-2.4279	-0.384579	-2.13944	-0.177656	-1.95007	-1.8222	-1.81026	-0.388746	-2.31315	-1.65747	-1.11258	-0.895886	-2.02539	-0.924057	-2.64739	-0.654124	-1.36763	-1.67642	-0.73417	-2.76479	-2.03185	-2.4991	-0.594633	-1.96589	-1.18812	-0.6408	-0.341553	-0.543939	-1.33509	-2.28865	-2.71435	-0.536809	-0.0648699
315	0.651926	2.39511	0.568878	1.54619	0.670868	2.37588	0.269762	0.838772	0.814921	0.456779	0.334209	3.13857	0.410799	1.88507	0.287823	1.24906	0.5939	0.682512	1.01091	1.71616	0.530743	0.410305	0.737161	1.06558	0.720532	1.96199	0.557883	1.88609	0.726724	1.19355	0.221984	0.666401	1.76797	0.998609	0.628866	0.13627	0.791738	0.521572	2.17324	0.329274	1.03645	1.4255	2.20069	0.638304	1.07337	-0.159571	0.260152	0.850951	2.63158
316	-2.56364	0.203461	-3.01612	-0.500012	-3.38687	-0.96974	-2.70554	-1.03933	-2.44332	-0.684718	-2.08727	-0.620314	-2.60062	-1.51137	-2.89639	-1.23983	-1.14598	-1.2097	-1.95236	-1.06287	-2.18611	-2.7139	-2.53286	-0.711339	-1.60597	-1.52305	-1.96877	-1.31544	-1.89089	-1.34707	-3.09621	-1.32482	-1.88273	-0.650597	-1.42888	-2.33703	-2.74832	-3.8482	-0.237341	-1.44084	-0.837297	-1.25077	-0.931625	-1.58404	-2.76026	-2.83781	-2.41549	-1.55969	-1.15851
317	-3.21466	-1.01737	-0.949473	1.46589	-2.64404	2.30398	0.945538	2.24073	-3.29702	-0.0804873	1.40575	-0.721199	-2.67608	-2.97055	-2.61978	0.40661	-3.46163	-3.60187	0.392224	0.30812	-1.83748	0.651899	0.874839	2.9164	-2.65465	0.775299	3.40657	3.15605	-3.019	-1.81757	-1.39445	1.77281	2.39737	-2.02551	-0.676882	0.351796	-2.00562	-0.641683	2.86053	-1.07689	0.652719	-1.59619	3.08414	-3.20135	1.33206	-1.98545	-2.16834	-3.49606	2.76883
318	0.626194	-3.26249	0.155084	-0.175934	0.0967879	-0.986994	-0.500151	-0.666823	0.396322	-0.567852	-0.625447	-2.43404	0.01439	-2.54651	-0.34208	-2.81141	0.0700779	0.201681	-0.439809	-0.197016	-0.515024	-0.804081	-0.474479	-0.862889	-1.12098	-2.59192	0.0702777	-3.13067	0.755064	0.472672	0.123849	-0.250318	-1.59201	-1.75012	-1.1624	-1.06534	0.466011	-0.306764	-2.40388	-0.303848	-1.5593	0.106293	-1.69758	0.54651	-0.509836	-0.140714	-0.0846853	-0.423232	-1.8029
319	-1.98172	0.843574	-2.78403	-0.137963	-1.51699	-0.131027	-3.42786	-1.07484	-1.29033	-0.43508	-1.01087	-0.251546	-2.35987	-2.44585	-2.19355	-0.987608	-1.93831	-0.965215	-1.73101	-0.319888	-2.25349	-1.69329	-1.6936	-0.810234	-3.09033	-1.84765	-1.2521	-1.11742	-1.80238	-0.966842	-2.75599	-1.13035	-1.22025	-0.555273	-0.55939	-3.1676	-1.95732	-1.7496	-0.275643	-1.77686	-1.02333	-1.26306	-0.59312	-0.956569	-0.734787	-2.36298	-2.45464	-0.879487	-0.484367
320	0.173813	0.604022	-0.205732	2.96923	0.435356	2.97662	0.897618	1.75504	1.43516	2.05853	1.58881	2.68447	-0.25721	3.00402	0.68384	3.22761	0.790449	0.738589	2.76715	3.48467	-0.18772	2.21257	1.7919	2.45745	-0.578732	2.74058	1.52357	3.34143	3.04821	2.29641	1.58248	1.60452	2.61991	-0.370679	1.91953	1.45003	1.06693	1.63647	2.98593	1.1847	1.50131	1.66381	2.51	2.67146	3.22182	-1.44095	0.659304	1.39022	3.10893
321	0.526152	1.14447	0.966406	-0.358398	1.33836	0.0621643	0.593749	0.133987	0.475053	0.051878	0.816796	-2.3849	0.00233459	-3.04918	0.342427	0.163532	0.812944	0.269998	0.846972	0.815083	1.00106	-0.377216	1.13918	0.0711532	1.9644	-0.0436411	1.03165	-0.228227	0.635674	-0.0378904	0.559717	0.510516	-2.12014	0.286172	0.1399	0.355121	0.815322	0.92611	-2.48906	0.450372	1.65791	0.212704	-2.97357	-0.101144	-0.57355	-0.326245	-0.232708	0.421209	-2.34986
322	3.61925	-0.948195	3.02	2.17316	3.61682	1.61748	2.89936	2.51589	2.92548	2.01768	2.54788	0.88658	2.88465	2.6314	2.91588	2.92911	2.84072	2.62697	2.72879	2.14656	3.5656	1.55734	2.85353	2.23099	3.59839	2.73238	3.28698	1.92548	3.17853	3.00071	2.69997	3.51081	2.0681	2.62551	2.1938	2.59531	3.64062	2.66151	1.89184	2.44333	1.40022	3.06894	1.706	2.69467	2.29266	2.69671	2.66449	3.03469	1.3257
323	-0.533905	0.820552	-1.11005	1.39828	0.725177	0.848542	-0.653374	0.239253	0.058341	-0.331521	-0.142824	0.736985	-1.67203	0.2988	-2.8811	2.32993	-0.397049	0.497825	-0.940142	1.02001	-0.630548	-0.917032	-1.15441	1.11421	0.17292	1.8915	0.0384688	1.73224	0.592159	1.12318	0.720212	1.04817	1.70928	1.99353	0.116657	-2.22617	0.621622	-1.15092	1.5048	-1.22818	-0.441083	0.159801	1.99594	0.434856	-0.157736	-1.9427	-1.45774	0.432839	2.43668
324	-3.11616	-0.392411	0.387303	-1.41757	-3.40683	0.105372	-3.34438	-2.19066	-2.68763	-3.05355	-3.11014	-0.763449	-2.51862	-1.4459	-2.99409	-1.17142	-2.48317	-1.80811	-2.57433	-1.1572	-3.23004	-2.94585	-3.10027	-1.43159	-1.44316	0.750538	-2.466	0.664942	-2.34499	-2.62448	-2.4774	-2.26706	0.0885248	0.267613	1.4014	-2.15604	-2.36908	-2.9248	1.68873	-3.0557	-2.17099	-2.8319	0.132642	-2.63452	-2.02269	-2.40393	-3.50261	-2.48403	1.1802
325	-0.346547	-0.439098	-0.298195	-0.426432	-0.302222	-0.0884018	-2.24381	-0.226243	-2.18503	-1.45328	-2.80487	-1.42742	-2.61565	-0.294817	-2.66712	-0.338133	-2.10937	-0.215328	0.127054	-0.0898643	-3.13427	-3.28622	-2.39433	0.242712	-2.71325	-0.32699	0.0773854	-0.282519	-2.65807	-0.491243	-1.85298	-0.317298	-0.191308	0.0937023	-3.0887	-2.14632	-2.6998	-2.23174	-0.0918703	-2.50293	-0.676997	-0.537016	-0.0678339	-2.43508	-0.0262642	-1.78297	-0.269769	-0.89703	-0.49353
326	2.01937	0.398969	1.78049	0.893563	1.72041	0.355578	1.21497	0.941355	1.54163	0.489867	1.46377	0.428955	1.54701	1.34542	1.75582	0.974936	1.55663	1.10158	1.30759	0.986519	1.70131	0.670035	1.44534	0.96426	2.13705	1.10419	1.49386	0.857464	3.71363	1.39473	1.81016	1.90082	0.965516	0.809449	0.899205	1.23119	1.62468	1.68227	0.46944	1.32452	0.588602	1.4206	0.571797	1.52775	0.638807	1.40733	1.12904	1.40407	0.681197
327	-3.05099	0.45464	-2.56393	0.621237	-2.57443	0.292208	-2.80493	0.472586	-2.60474	-3.23418	-2.307	0.499843	-2.75668	-2.66175	-2.50027	0.0524793	0.0573769	-2.2233	-2.31764	0.27306	-1.86089	-3.75921	-2.47871	0.681489	-2.5645	-2.88069	1.42292	-0.205338	-2.47924	0.113717	-1.74959	0.0180311	0.526126	0.444586	-2.74428	-2.8334	-2.57773	-2.44855	1.54306	-2.80414	0.567487	-3.23025	0.919312	-1.64948	-2.86997	-2.70502	-1.79894	-1.81003	0.380064
328	-0.953643	1.25078	-0.695353	0.608422	-3.08038	1.56798	-2.15594	-1.79525	-0.232937	-0.807405	-0.727067	1.87802	-2.80166	0.836827	-1.71859	0.393532	-1.16117	-0.708295	0.508281	1.32377	-0.183675	0.278211	-0.191401	0.257248	-0.537112	3.10052	-0.405762	2.36954	-0.528981	-0.570886	-3.06457	-0.728169	1.91828	1.29587	-0.256871	-1.24598	0.209573	-0.732505	1.31682	-0.52625	0.172297	-0.0942936	1.38321	-0.99241	0.241736	-2.27643	-2.97931	-0.574379	2.85378
329	-0.14819	0.102227	-0.268167	1.22911	-0.29678	1.93449	0.639647	1.28388	-0.179087	0.478294	-0.146791	1.24395	-0.282016	1.86351	-0.675305	1.28932	0.0853882	0.658986	0.28892	1.87779	-0.0739727	0.608057	0.672717	2.46047	-0.655847	0.614491	0.997684	0.592053	-0.227843	0.746656	-0.403332	0.113754	0.301463	-1.08198	0.102327	-0.339261	-0.00588799	-0.136543	1.66263	-0.262485	1.15552	1.99061	1.54037	0.0352726	0.866935	-0.554296	0.111429	0.607752	0.579295
330	-0.716649	-3.00168	-0.374116	-2.48959	-0.497426	-2.38958	-0.509344	-2.68961	-0.524324	-2.39757	-0.491289	-1.94028	-2.5766	-1.85388	-0.156907	-0.458736	-2.18313	-2.05831	-2.66296	-3.5648	-2.77071	-3.00635	-0.183065	-2.97639	-0.388174	-2.74329	-0.063664	-2.80592	-0.565746	0.179758	0.0852132	0.617544	-1.74483	-0.859327	-2.32038	-2.29508	-0.591182	-0.25941	-3.41237	-0.0677958	-2.77135	-0.940799	-1.35487	-3.15032	-3.11826	-2.32774	-2.85493	0.0440803	-2.42237
331	-0.761516	1.31987	-0.882941	1.07317	-2.5167	1.06224	-0.317281	0.294852	-0.142939	0.379542	-0.0571661	1.46051	-3.52642	-0.320477	0.336317	-0.272248	-0.880061	-0.197209	-2.69163	0.330005	-1.69905	-0.0941653	-2.88716	0.554066	-0.625648	-0.773178	-2.28678	0.336054	0.464671	0.310969	-2.77967	-0.224877	0.783979	0.703721	0.339959	-2.905	-0.255218	-0.140054	1.13737	-2.70528	0.142356	-0.0637341	0.718347	0.193627	0.00539207	-0.357599	-2.44388	0.231266	0.761743
332	-2.01339	0.398209	-2.90546	-0.143141	-3.06929	1.52122	-0.888567	-0.7087	-0.929458	-1.33473	-1.2643	0.503472	-1.27747	-0.128123	-2.86538	0.175621	-1.18961	-1.08463	-0.266059	0.430204	-1.61486	-0.386064	-0.603035	0.610714	-2.19731	1.02445	-1.09298	0.683173	-2.36075	-0.126476	-2.30709	-1.0228	0.567183	2.56883	-1.43786	-0.631229	-1.00273	-0.746716	2.73682	-1.13975	-0.245754	-0.517665	0.709181	-3.14529	-0.345966	-2.22646	-3.00583	-0.709735	0.215245
333	-0.415172	-2.69973	-0.00229788	-0.822855	0.756132	-1.30262	-0.222927	-0.88959	-0.525035	-2.80369	-0.803858	-0.915266	-0.445123	-1.36206	-0.623273	-0.2812	-0.244838	0.306087	-2.48336	-3.19199	0.0414801	-2.88601	-0.291107	-1.34043	0.569273	-3.77292	-0.204105	-3.32109	0.38558	-0.417298	-0.26067	-0.0467949	-2.7662	-1.00304	-2.7711	-0.312593	-0.492002	-0.079196	-1.13565	-0.736755	-3.69645	-0.431856	-1.45051	-0.520149	-2.00864	-0.542892	-0.646136	0.367079	-1.77401
334	-0.0806584	0.434164	-0.544416	0.825324	0.137419	0.55446	-0.941433	-0.0223083	-0.00391865	-0.622581	-0.176424	1.4659	-0.860688	1.34244	-1.253	1.13442	-0.424225	-0.0626593	-0.467932	0.380574	-0.419677	0.00419188	-0.686336	0.705018	-0.185975	1.25627	-0.466526	1.23733	1.51987	0.162992	-0.493247	-0.363386	0.888615	-0.883449	0.0612211	-0.476254	-0.346392	-0.964835	1.49489	-0.410186	0.0113573	0.296742	1.16821	0.467329	0.284088	-1.07741	-0.753132	-0.0608087	1.06796
335	-1.04728	-0.317428	-1.52731	-0.52141	-3.15922	-0.35899	-2.47377	-1.24502	-0.689157	-0.97659	-0.699039	-0.0974636	-2.83212	-0.283869	-1.77214	-0.206256	-1.44149	-1.05935	-1.35541	-0.480123	-0.296203	-1.15866	-1.58564	-1.32667	-2.38164	-0.0339746	-1.2187	0.716914	-0.932851	-0.539439	-3.70846	-1.17734	0.666799	-0.826211	-1.29227	-3.16553	-0.638044	-3.02978	0.134996	-2.29937	-0.558061	-0.979462	0.0885277	-0.924562	-1.20481	-3.05529	-3.04215	-0.551975	0.861605
336	-0.838689	1.14248	-0.913611	0.687472	-1.54862	-0.241974	-3.06121	-0.0748787	-0.925554	0.435658	-0.174274	0.287064	-2.75344	-0.303843	-1.03756	-0.855446	-1.0154	-0.533566	-1.62074	-0.341381	-1.17838	-0.568508	-0.496883	-0.516692	-1.18235	-0.227324	-0.747074	-0.611375	-1.17899	-0.00105953	-0.854296	-0.522013	-1.29631	-0.897006	0.0207787	-3.22587	-1.20678	-1.24596	0.553951	-3.23875	-0.483998	-0.514441	-0.332114	-0.0562286	-0.711205	-2.2185	-0.900235	-0.599337	-0.0898438
337	-1.89531	-0.587821	-1.74633	-1.15947	-1.7706	-0.898193	-2.14192	-1.41247	-3.41181	-3.24613	-2.55728	-1.29535	-1.83992	-1.20274	-2.93015	-1.27798	-2.60929	-3.41538	-2.94688	-1.47887	-2.22782	-1.90049	-2.52611	-1.33396	-1.37527	-1.03874	-1.55348	-0.753742	-1.31517	-1.38249	-2.36793	-1.65772	-1.81521	-3.42364	-2.70141	-2.96636	-4.04465	-3.18086	-1.29069	-2.86066	-2.3593	-2.44406	-1.42373	-2.98407	-1.05019	-2.211	-2.4552	-2.27042	-1.01111
338	9.6681	6.08566	10.1506	8.99434	9.6015	8.95775	9.74505	9.2224	9.27512	9.2062	8.58817	5.41146	10.2828	8.67407	10.381	9.05955	10.0287	10.1011	8.9668	8.94581	9.64071	7.71004	9.18306	8.3384	9.10576	8.79995	9.60106	8.02973	9.47472	8.6163	9.99533	8.93929	8.56349	8.53223	8.88513	8.99443	9.57217	9.43885	7.64637	10.0551	8.37891	9.42612	8.11085	8.54958	8.31937	9.68913	9.62087	9.543	8.2698
339	4.17231	6.35416	3.76097	5.29282	3.55983	5.44463	3.61371	4.95683	3.71953	3.40092	3.45836	4.8604	3.69579	3.68494	2.69307	3.62292	3.66108	4.12139	3.64116	4.8216	3.35403	3.65185	4.02142	4.87066	4.25948	3.69425	3.73084	4.90672	3.70051	5.41443	3.43185	4.41075	4.26019	4.98338	4.70791	3.3571	3.61289	3.57861	5.35024	3.06629	3.7757	4.28935	5.23161	3.45901	3.61212	3.01527	3.54241	4.29183	5.01386
340	0.824354	0.465037	1.3868	2.67966	0.404626	2.31938	1.5071	2.3072	1.41478	1.84963	1.95044	1.18238	0.397161	1.21246	-0.287893	2.73942	0.592016	0.725589	2.36246	3.10891	-0.112574	1.70792	2.53076	3.02303	0.315294	2.23179	1.79467	3.55352	0.973469	1.92667	0.912221	2.39427	4.31001	1.51803	2.01982	1.83007	0.6193	1.87702	3.12432	0.927288	2.63572	1.84126	2.90744	-0.0597057	2.60233	-0.384577	0.461704	1.0173	3.99118
341	2.29221	2.9635	2.36116	3.33851	2.34216	3.12529	1.77172	3.05376	2.42886	2.60423	2.19501	3.21212	1.95056	2.75614	1.89442	2.70621	2.34516	2.38868	2.57707	3.17513	2.28574	2.36513	2.41124	3.04372	2.36821	3.13365	2.4062	3.42687	2.35346	3.09781	2.0912	2.67915	2.86781	2.04949	2.48184	2.09072	2.37968	2.10064	3.115	2.20335	2.54591	2.70996	3.06275	2.21498	2.68806	1.60406	2.281	2.59204	3.32289
342	2.13263	4.20363	1.70416	3.32126	2.19936	3.567	1.84582	3.12199	2.14655	2.16634	1.33184	3.07065	2.10648	1.97228	1.60829	1.79819	1.94368	1.9828	1.97749	2.90066	2.03181	1.94196	2.35404	2.76491	2.2364	1.9923	2.04633	3.31743	2.1497	3.86296	1.60093	2.37434	2.4114	2.92174	2.75721	1.32562	2.1211	1.72407	3.3768	1.58322	2.18672	2.15837	3.43985	1.79079	2.16911	1.58045	1.94242	2.50785	3.28515
343	1.17815	-1.05283	0.829703	0.166155	0.784254	-0.0987959	0.646331	0.373756	0.743649	0.012949	-0.0630007	-1.09839	0.621154	-0.395801	0.741277	0.257826	0.660787	-0.254715	0.819728	0.200943	0.773724	-0.737255	0.873734	0.243286	0.65368	-0.195863	0.920998	-0.161195	0.629436	0.272401	0.857693	0.844559	0.245637	0.58628	-0.271461	0.593473	0.660097	1.07206	-0.228008	0.577071	-0.135046	0.654634	0.184464	-0.295107	-0.0845575	0.224998	0.20085	-0.17682	-0.251704
344	0.283071	3.10604	0.918154	3.80978	1.04272	2.76754	1.16468	2.07198	1.60208	3.82667	2.22852	2.9587	0.96319	1.03878	0.860775	1.29416	0.414773	2.7265	-0.044683	2.36787	0.497258	0.697146	-0.0641413	1.54376	0.148631	0.361261	1.11784	2.13188	0.169274	1.12305	0.600525	2.09843	0.549129	0.702519	2.47201	-0.320286	0.186314	-0.345304	1.97088	0.400799	1.15497	2.11672	2.25349	2.41894	1.89194	0.15158	0.861279	1.82697	2.30433
345	1.50476	-3.61505	1.26247	0.325459	1.79924	0.469105	0.821813	0.692652	0.89316	-2.62471	1.10312	0.801801	0.841416	-3.00753	0.352911	0.111732	1.42251	0.991541	0.898671	0.983968	1.14043	-2.81866	0.654432	0.235483	1.17119	-3.02877	0.986629	-2.63088	1.31797	1.12434	0.587031	1.17964	0.540559	0.618641	0.26236	0.577466	1.39655	0.596962	0.00264454	1.50061	-2.36547	0.859726	0.960158	0.854927	1.18972	0.644195	0.528047	1.02899	-2.14888
346	-0.503439	3.34144	0.52559	0.528106	0.0109801	1.20461	0.756561	0.182645	-2.33053	-0.609254	-0.217515	0.394535	-2.59425	0.316112	-2.64211	1.87546	-0.192266	0.4054	-1.02362	1.26644	0.193588	1.9505	-0.771387	2.8435	0.760605	3.15282	0.330435	1.3791	-0.720842	-0.312634	-2.96219	0.0639238	1.38346	2.45605	0.277372	-0.147676	-0.627212	-0.696256	2.1473	-0.30603	0.672396	-0.727196	2.51784	-1.03002	0.595809	-0.778551	-0.931564	-0.901026	-0.768933
347	1.20616	-0.0918188	1.11803	0.0649853	1.4071	-0.00457287	0.770003	0.218464	0.957397	0.21113	0.166247	-2.54083	0.818101	0.627863	0.967504	0.592441	1.01364	0.771198	0.780242	0.409389	1.3701	-0.458257	1.09331	0.574018	0.97516	0.410162	1.0434	0.163373	1.04766	0.76427	0.789341	0.785956	-0.15224	0.590316	0.141163	0.670249	1.26128	1.08136	0.259464	0.781592	-0.0632591	1.03786	0.541065	0.776193	0.211369	0.556521	0.565799	1.01574	-0.17695
348	-0.412794	5.28833	-0.904948	2.59498	-0.47119	2.76752	-2.71372	-0.624226	-1.6218	-1.79435	-2.81313	3.77504	-1.50926	-1.01062	-1.24298	-2.59203	-0.00329971	-1.31084	-2.49301	0.19753	-1.12329	-2.77288	-2.80983	0.952606	-0.0250711	-1.48678	-0.578756	-0.0417919	-0.801173	0.0418081	-1.10355	-0.643955	-0.519135	-1.28681	-0.502651	-1.8896	-0.0946331	-1.31813	0.975894	-1.20788	-0.460711	-1.52101	2.24698	-2.46338	0.00151539	-1.22577	0.181922	0.201169	1.50049
349	2.78224	-1.28578	2.61371	1.48298	2.86368	1.10703	2.30155	2.13503	1.89546	1.64634	1.52345	-2.5146	2.67702	-0.951114	2.58481	0.027451	2.59662	2.29944	1.56191	1.77251	1.83131	0.497683	2.12385	2.61015	2.04733	0.422448	3.15734	1.65795	2.70979	1.08909	2.27605	1.75963	0.976468	1.06552	1.06504	1.28734	2.95086	2.10304	0.612502	2.26814	1.00381	2.29829	1.01707	1.9628	2.4237	1.76403	1.95681	2.21301	0.377989
350	-1.64934	1.52974	-2.40216	0.566379	-1.9541	1.18854	-2.91364	-1.60861	-2.39104	-1.95286	-2.3524	-1.9397	-2.87468	-1.11896	-1.85148	-1.31515	-2.18544	-1.41339	-3.16813	-1.88113	-1.84525	-2.07386	-2.46155	-1.58823	-2.17633	-1.58807	-2.76386	-0.882355	-2.00826	0.720572	-3.28856	-1.27067	-2.45778	-1.18318	-2.15133	-2.59024	-2.33999	-2.14822	-0.973326	-3.14622	-1.86392	-0.939881	-0.065135	-3.15509	-1.36881	-3.12615	-1.68667	-1.33445	-1.94933
351	-0.566157	-3.19171	-0.608495	-2.42378	-0.364148	-1.45521	-1.34772	-2.09923	-1.18328	-0.952316	-0.725794	-2.09371	-1.07132	-2.42913	-0.861636	-2.61732	-0.864855	-0.820414	-0.887402	-1.15523	-0.73505	-3.02019	-0.921189	-3.0068	-0.492533	-1.36444	-0.87433	-1.39834	-0.688252	-0.976547	-0.853201	-0.771785	-1.19471	-1.93899	-3.16536	-0.839839	-0.676227	-1.02398	-1.99867	-1.30293	-3.17885	-1.00514	-1.85856	-0.945716	-2.63003	-1.2568	-1.03023	-0.572971	-1.45157
352	-0.773942	0.537616	-0.946811	0.0327549	-1.05277	1.11473	-1.03085	-0.111712	-0.42076	-1.99467	-1.16499	-0.26594	-0.833448	-0.00240803	-1.31574	-0.36001	-0.815342	-1.10162	-0.615147	-0.0388408	-0.669858	-0.654179	-0.665313	-0.270522	-0.618067	-0.126142	-0.868392	0.36411	-0.955029	0.114606	-0.318555	-0.255587	0.0168772	-0.44473	-0.658348	-1.42483	-1.07518	-0.765462	1.04506	-1.48709	-0.372502	-0.514906	0.115382	-1.6541	0.303086	-2.32675	-0.751364	-1.21024	0.344296
353	4.00928	3.62056	3.87369	5.11948	3.98337	6.11364	2.75433	2.78753	4.80581	3.0058	4.0064	5.97816	3.36257	6.13161	3.50519	6.19949	3.85118	4.1973	4.81811	5.72733	3.8897	5.07609	3.8036	4.77336	3.58219	6.65745	3.55167	7.09331	4.55039	4.60467	3.43548	3.93227	5.87247	4.29205	3.53007	2.79636	4.0463	3.51159	6.5991	3.74436	4.10257	4.34313	6.28694	4.28811	5.0429	3.21161	3.42301	4.40933	7.0768
354	-2.55861	-0.456981	-1.84926	-0.41134	-2.63069	-0.281457	-2.43664	-0.737342	-2.52011	-1.01409	-0.763287	-0.0659885	-2.17927	-0.638532	-0.554366	-0.736376	-1.01411	-1.07693	-1.62692	-0.333766	-1.34456	-3.26447	-3.5379	-0.644098	-0.943701	-0.550591	-1.04348	-0.42695	-0.828744	-0.747196	-3.36869	-0.927953	-0.720689	-2.86378	-1.03762	-3.11154	0.109731	-3.66463	-0.432458	-0.848658	-0.71118	-0.516783	-0.480212	-2.47551	-0.780424	-2.46978	-1.42421	-1.05158	-0.287704
355	-2.47696	-0.718076	-1.90352	-1.088	-1.73805	0.256077	-2.87965	-1.53972	-1.84226	-1.0184	-1.86253	0.96584	-2.78549	-1.06569	-2.71817	-0.456126	-2.56357	-1.61796	-1.53281	0.0981774	-2.49789	-2.49816	-1.39009	0.242534	-2.7306	-1.72443	-1.82534	-0.860691	-1.89259	-0.717691	-2.00861	-2.04319	-0.840134	-1.78237	-2.57648	-2.1077	-2.13937	-1.58201	0.327387	-1.0576	-0.810684	0.318043	0.108369	-2.61008	-0.756199	-2.48586	-1.88848	-1.35622	-1.07001
356	-1.03099	-3.46229	-1.12917	-1.99595	-1.06033	-1.88763	-1.34747	-2.21356	0.1391	-1.56705	-1.0797	-1.34601	-1.51118	-1.61732	-0.966253	-2.70661	-1.32831	-1.44544	0.475193	-0.266446	-1.4768	-2.62277	-0.59405	-1.84001	-1.32974	-2.20693	-1.45955	-3.18551	-1.09905	-1.20011	-1.18522	-0.663623	-2.81744	-1.99077	-1.81076	-1.70978	-1.16321	-1.27275	-2.39708	-0.931907	-1.69678	-1.72932	-2.77446	-1.76401	-2.83031	-1.3203	-2.74848	-1.4329	-2.7377
357	-0.0933747	-2.23264	-0.0256362	-0.044795	-2.98478	0.189315	-2.7436	-0.0631514	-2.33309	-1.38941	1.35502	-0.0578318	0.113044	0.751644	-2.74683	-2.53356	-0.135631	0.648882	-2.52856	-0.172006	-0.170161	1.78374	-2.34923	-0.5911	-0.473637	-0.058094	-3.34375	0.297245	-2.47321	0.125083	-2.49021	-0.0723953	-0.142101	-3.79888	0.477359	-0.15119	-3.24116	-2.80828	-0.140247	-1.95612	-0.324372	-1.98301	-0.22341	1.06512	-0.607409	-0.65271	-0.0284042	-1.80015	0.311662
358	0.814206	1.68782	0.791953	1.8473	0.941682	1.4805	0.366539	1.39706	0.5949	0.152335	0.361801	1.74895	0.409599	1.43014	0.275244	1.59614	0.836464	0.950236	0.820411	1.57324	0.835309	1.0508	0.610463	1.82908	0.861239	1.63742	0.773437	1.97961	1.06614	1.41469	0.569931	1.22516	1.67165	1.95729	0.623153	0.222646	0.448361	0.690792	2.63094	0.509144	0.884419	0.952309	1.85984	0.42733	0.950415	0.110236	0.510312	1.06042	2.19166
359	1.05409	2.46984	0.986043	1.83403	0.0976434	1.54185	0.285275	1.46955	0.143881	0.622443	1.37783	1.34138	0.77409	1.40547	-0.0532508	0.891673	0.690619	1.2894	1.04994	1.48944	0.560205	2.00658	0.759829	1.89773	0.66067	1.25954	0.902117	1.74634	0.596704	1.44192	0.339978	0.778473	2.36061	1.60425	1.25548	0.13839	0.658276	0.768508	2.28863	0.396214	1.13883	0.808927	1.65353	1.41126	0.953973	-0.0461483	0.821131	1.06043	1.13983
360	-2.72168	-0.495255	-2.3544	-0.270561	-2.39619	-0.834126	-2.25739	-0.414446	-1.15743	-2.09695	-3.32142	-0.664549	-2.86078	-2.17162	-2.36345	-2.27852	-2.65141	-1.57295	-1.91736	-0.759025	-3.02525	-3.42447	-3.09836	0.0651221	-2.48571	-2.47005	-1.73894	-0.958985	-2.65143	-0.878934	-2.50741	-2.25837	-1.78649	-2.36258	-1.23157	-3.07184	-2.66662	-2.66576	-0.329541	-1.89488	-3.02573	-1.59648	-0.852342	-3.21823	-0.799004	-2.23281	-2.53081	-1.08223	-0.623344
361	2.2887	3.45189	2.93501	3.95442	3.07722	3.50727	3.13103	4.0352	2.7282	3.03447	2.66865	3.82805	2.54673	3.18924	2.11255	3.52684	2.83475	3.32659	2.86287	3.36037	2.58778	3.14397	2.80351	4.1441	2.99204	3.22907	3.02004	3.43994	2.77781	3.38806	2.46675	2.88503	3.71037	2.88069	3.55772	2.76786	2.80284	2.87653	4.16548	3.00371	3.90911	3.22559	3.59131	3.05989	3.00327	1.85322	2.31068	3.29898	3.74134
362	-2.73944	-0.979491	-3.47572	-0.562281	-3.54186	-0.842197	-2.39075	-1.49858	-1.5355	-2.21641	-2.01192	-1.40331	-3.20415	-1.12477	-2.32059	-1.8474	-2.66698	-1.5629	-1.64829	-1.25931	-3.06722	-1.02574	-2.16783	-0.914755	-2.22001	-1.2046	-1.34759	-0.140209	-2.88856	-0.94605	-2.44989	-0.49522	-1.0314	0.0830135	-3.21379	-2.66375	-2.34308	-2.97938	-1.19463	-2.3463	-1.04405	-1.49236	-0.47261	-2.39043	-1.87433	-1.32536	-3.04799	-1.90493	-0.737096
363	1.38687	4.05976	1.47568	2.1756	1.38713	3.05203	0.980747	1.63583	1.2898	0.872302	1.19002	2.67997	0.902029	2.29029	1.07985	2.20865	1.09386	1.48112	1.24162	1.88042	1.38472	1.62295	1.35377	2.5346	1.48301	3.11829	1.26893	2.93156	1.63473	2.08903	0.893488	1.72967	2.40739	3.56778	1.35507	0.51377	1.00373	0.890551	4.08611	1.1703	1.73709	1.94912	2.87978	1.2416	1.37134	1.07943	1.23813	1.59487	2.24901
364	6.31664	6.12066	6.48491	5.34436	6.57803	5.53165	5.9683	5.54875	6.04197	5.13997	5.76194	4.77334	6.06566	4.40646	5.24732	4.8851	5.8241	5.65322	6.6333	6.06494	6.05241	4.49064	6.63169	6.08607	6.30891	4.81779	6.24548	4.79755	6.22554	5.91911	5.94412	6.3342	5.46089	5.5821	4.80713	5.68999	6.00087	6.46344	6.09721	5.75371	4.72971	5.66306	5.06347	5.33363	4.95414	5.38062	5.19549	5.85079	4.96042
365	-3.2397	-1.3698	-2.10445	-0.79805	-2.31964	-0.620768	-2.57615	-0.943991	-2.10124	-2.3662	-2.87262	-1.37049	-2.72695	-1.35818	-2.22654	-1.74597	-2.65084	-1.20943	-1.56535	-1.01931	-2.59499	-1.03915	-2.03988	-1.28089	-2.21008	-1.95652	-2.54632	-1.10378	-0.423803	-0.778978	-2.83482	-2.54104	-1.03844	-0.886885	-1.16666	-3.00018	-1.88402	-1.52018	-1.27776	-2.35451	-1.64673	-1.02097	-0.535119	-2.38298	-1.62036	-2.9852	-2.31657	-1.43262	-1.11994
366	0.390114	1.60797	0.36268	1.29273	0.407341	1.42599	0.0843773	0.616123	0.566445	1.02922	0.443804	1.67743	0.189645	0.513862	0.0229239	0.409293	0.488008	0.726659	0.261095	1.14618	0.314382	0.673346	-0.23528	1.48927	0.0527964	0.504157	-0.140909	0.783544	0.930328	0.858008	0.224707	0.841688	1.78738	0.340381	0.921345	-0.270329	0.397511	0.203423	2.14378	0.332108	1.26258	0.766449	1.7682	0.959284	0.747998	0.0402613	0.339132	0.76266	1.9831
367	-0.179028	-0.250476	-0.851326	0.0691414	-0.245087	0.0918493	-1.26204	-0.380642	-0.229887	0.0658436	-0.575457	0.295259	-1.10371	0.241747	-0.76461	0.298022	-0.567772	-0.204482	-0.292558	0.33304	-0.640541	-0.351509	-0.726406	0.891612	-0.605196	0.508377	-0.449605	0.770141	-0.124287	0.0625792	-0.853863	-0.105942	0.276389	0.490283	-0.530133	-1.41818	-0.371507	-1.36834	1.14832	-0.651589	1.01391	-0.480746	0.722771	-0.493119	-0.471065	-1.33229	-1.02797	0.0519166	0.353206
368	0.0433545	0.560727	0.0549941	1.06207	0.0159526	0.979568	-0.302094	0.534559	0.17996	0.0962114	0.875993	0.981147	-0.248176	0.962645	-0.587724	0.504309	-0.0952911	0.590833	0.434108	0.873592	-0.0819836	1.00344	0.248907	1.4999	-0.140658	0.992758	0.0330234	1.01977	0.422817	0.888915	-0.240745	0.37606	1.05674	0.426884	0.213971	-0.378259	-0.0257969	0.0945072	1.70501	-0.124023	0.419319	0.39935	0.93049	0.474409	0.487556	-0.407086	-0.550878	0.0555215	0.81483
369	-1.21864	-0.5467	-1.15912	-0.0064249	-1.13382	-0.465395	-1.31638	-0.713932	-1.13606	-1.17996	-2.46161	-0.368773	-1.43663	-0.335967	-2.3564	-0.155946	-1.00649	-0.678174	-1.19068	-1.04217	-1.07948	-1.62856	-0.494531	-0.0922589	-0.884351	-0.0841198	-1.12799	-0.160033	-0.816903	-0.543767	-1.24575	-0.710715	0.314443	-0.637178	-0.963016	-1.05503	-1.36479	-1.04729	0.410973	-0.854855	0.111331	-0.592099	0.182585	-2.72337	-0.708435	-3.23326	-1.38947	-0.906523	0.101487
370	1.26885	-2.72068	2.14038	0.0481901	0.745908	-0.737395	2.16225	1.71117	3.22129	1.78767	2.54585	-1.97185	0.466306	-1.62157	-0.304689	1.09132	1.05102	-1.05872	4.98426	3.12533	1.02373	-2.45848	4.32777	-0.112514	0.197761	-2.93701	2.71505	3.4058	1.37451	2.36846	3.85447	3.05354	-0.159326	-0.0345669	1.75087	4.69156	1.35549	3.93032	-1.79872	2.01845	0.301562	1.78088	-2.17424	0.255556	1.07334	0.264139	0.413301	-0.667934	-0.461285
371	0.249221	0.416562	0.297148	0.992334	0.170713	1.90558	-0.20383	-0.557906	0.78261	-0.193863	0.399973	2.03281	0.118301	1.78525	0.255063	1.92415	-0.0715551	0.157273	0.931352	1.47405	0.54297	1.01273	0.271338	0.913691	0.474907	2.94949	0.190286	2.49871	0.644763	0.542904	-0.126593	0.177705	2.19406	0.0468645	0.210277	-0.358365	-0.0977249	-0.33644	1.517	0.453856	1.04531	0.831667	1.6936	0.407209	1.08633	-0.422542	-0.0389853	0.353208	2.70461
372	2.51769	-1.6388	2.13757	1.74616	1.75841	0.886524	1.85229	1.04848	2.15869	1.07497	1.609	-0.362229	1.92906	-0.373722	2.00698	1.26936	1.72933	1.7237	1.71742	1.52771	1.86324	0.819324	1.83999	1.22623	2.36911	1.035	2.24811	1.35978	2.64543	2.32689	2.00549	2.36339	1.2554	1.87316	1.31119	1.49334	1.9125	2.06307	0.489298	1.83699	0.7415	1.81248	0.93046	2.20118	1.42564	1.74316	1.72053	1.73692	0.756874
373	2.86918	3.38487	2.13069	3.39942	2.46545	3.50831	1.6042	2.3704	2.49294	1.95461	2.5033	3.17659	2.07855	2.82756	2.16366	3.02397	2.57192	2.31419	2.48033	3.57375	2.6875	3.01244	2.39265	3.74198	2.32965	3.51755	2.3832	4.48893	2.65724	2.88438	2.02539	3.26661	3.02979	3.49455	2.42273	1.41102	2.54714	1.89067	3.92394	1.71876	2.79082	2.86134	3.86293	2.45965	2.60009	1.70567	1.7724	2.56881	4.12506
374	0.0586314	-1.21405	0.0258384	-1.07701	-0.147026	-1.14571	-0.26833	-0.903148	-0.62179	-3.03901	-0.791174	-3.01374	-0.158669	-1.43437	-0.213137	-1.19314	-0.0842237	-0.552434	-0.382651	-0.61223	0.0474777	-3.36182	-0.48525	-0.608119	0.0623837	-1.62365	-0.413064	-0.974541	0.248615	-0.486706	-0.117907	-0.291823	-1.03067	-0.820569	-1.41416	-0.56718	0.0913105	-0.504245	-0.623469	-0.390522	-2.20722	-0.509616	-0.791808	-0.459459	-0.605225	-0.201648	-0.515636	-0.674399	-1.03693
375	0.719778	-2.3455	-0.21571	-2.04992	0.552341	-2.86409	-0.464884	-2.68044	0.603445	-2.41995	-1.27654	-3.88073	-3.01734	-2.27052	-0.0746713	-0.141648	-0.0875902	-0.0280724	0.0274987	-3.07672	0.375807	-3.16369	-0.332314	-1.96514	-0.170028	-1.66337	0.0163465	-2.34766	0.191945	0.0899076	1.67473	1.63706	-1.90966	-2.89253	-2.07307	-3.40653	1.75342	0.908637	0.69456	0.954588	-1.2149	-0.403788	-2.64484	-0.786611	-3.03918	-0.0099411	0.319091	-2.37505	-1.94494
376	0.883454	2.65892	1.16165	2.50582	1.02995	2.70252	0.888985	1.48275	0.769184	1.54984	0.919631	2.80941	0.536689	1.37326	0.560621	1.3742	0.80421	1.72125	1.41728	1.98616	0.681594	1.00275	1.14344	2.61855	1.00694	1.70266	1.17264	1.44016	0.880146	1.97693	0.589821	1.4199	2.59075	1.39939	1.49584	0.909429	1.39995	1.14583	2.27681	0.743307	2.25591	2.08612	1.87851	1.36422	1.38858	-0.0899143	0.617774	1.87146	1.66124
377	2.26019	-3.09908	1.94997	0.609757	2.76353	0.725561	-2.31572	0.960116	-2.25544	0.339554	0.48781	-2.54539	2.08386	-2.03089	2.55473	0.482636	2.25459	1.50705	0.930131	1.15356	2.06461	-3.73694	1.84014	0.978517	0.772117	-1.95637	1.48015	-1.08101	1.84179	-3.08574	2.10531	0.896645	0.604806	1.18229	-2.34941	0.896244	2.84037	-3.12726	0.0946922	2.98065	-0.0832157	2.00719	-2.62758	0.62771	-2.36513	1.27106	1.0084	2.18106	-0.541777
378	2.54504	-0.369142	2.27594	1.6084	2.46007	1.28335	1.90557	1.36716	2.14792	1.22643	1.83772	0.166209	2.23708	1.06516	1.95293	1.39722	2.1508	1.76037	2.07912	1.80655	2.46026	0.85279	2.0461	1.67917	2.61539	0.985406	2.38216	1.4676	2.29764	1.83686	2.1093	2.4332	2.21067	1.34505	1.45528	1.77526	2.16991	2.02601	0.831516	1.87773	0.931654	1.85709	1.07893	1.6462	1.33746	1.71698	1.68781	1.79342	1.87028
379	2.26089	4.03305	2.4191	3.29706	2.59831	3.24666	1.90329	2.83938	2.03732	1.77705	2.52433	3.59646	1.46812	2.549	0.994716	2.64567	2.16813	2.77416	1.99639	2.99714	2.14297	3.25243	2.12426	4.43443	2.2897	2.69691	2.4749	3.03153	2.46893	2.79576	1.65983	2.34386	2.95286	2.8768	2.37892	1.70088	1.92889	1.92447	3.82257	1.76721	2.31167	2.44519	3.48627	2.45815	2.71136	1.27457	1.44279	2.48345	3.84787
380	0.00531816	-0.296753	-0.422212	-3.04094	-0.499179	-2.9761	-2.02724	-2.60996	1.61437	1.50564	0.280108	-2.6888	-0.233231	1.83508	0.504885	-1.77287	-0.0611506	0.336794	1.81572	-0.0428596	0.154999	-2.27757	0.605629	-1.50334	-0.377076	-0.879098	-0.563447	-0.518913	0.537479	-0.451354	0.159746	0.27951	-1.82444	-0.94317	-3.33758	-0.94005	-0.0618362	-0.548474	-3.10109	0.263898	-2.88006	-0.0949612	-3.03751	0.504578	-0.515599	-0.168349	-0.873587	0.0222001	-2.16431
381	0.0447106	0.818893	-0.206042	1.03051	-0.113569	0.853965	-0.160321	0.712513	0.239816	-0.258492	0.139261	0.830337	-2.35452	0.490271	-0.550707	1.52718	-0.107583	-0.0235348	0.211936	0.467757	-0.593321	0.408902	0.0709457	1.00115	-0.200386	1.72596	0.484742	2.3388	0.402486	-0.01015	-0.00987673	0.45525	2.04459	-0.432837	0.218808	0.0458269	0.074954	-0.0225716	1.28985	0.16299	0.296423	0.179896	1.48721	0.541067	0.582302	-2.13575	-0.577504	-0.498271	2.49618
382	-0.889184	3.0226	-0.706403	1.45376	-0.546772	0.877983	-0.565557	0.301448	-0.304198	0.919708	-0.14439	1.63234	-1.02672	-0.123481	-0.646825	-0.0252786	-0.820217	0.515031	-3.31276	0.611738	-0.689263	-0.604373	-0.526794	0.262775	-0.766606	-1.17452	-0.349644	-0.104259	-0.764776	-0.37313	-0.722017	-0.0840454	-0.524405	-0.563954	-0.216138	-0.403734	-0.506271	-2.80415	0.562621	-0.803073	-0.148888	0.214642	0.515491	0.276454	-0.229182	-2.45753	-0.685865	-0.124641	0.756458
383	-2.22848	-0.70179	-2.78074	-0.773546	-2.46532	-0.682837	-2.11572	-2.9314	-2.05589	-2.03311	-1.27554	-0.669694	-3.19284	-0.543692	-2.37332	-0.306211	-3.17099	-2.97636	-1.33673	-0.675333	-2.4872	-0.82656	-1.97506	-0.707136	-2.41438	-0.294827	-3.2039	0.0949144	-2.24982	-0.890965	-2.45013	-1.63245	-0.41631	-1.95806	-2.68786	-2.62682	-2.93232	-2.88144	-0.501983	-0.984017	-2.7165	-1.0107	-0.323957	-1.09652	-3.36608	-2.97218	-2.77081	-2.85164	-0.149599
384	0.585153	-1.08501	0.239974	-1.00134	0.609866	-0.728515	-0.0334959	-0.978494	0.231424	-1.14899	-0.669559	-2.13761	0.0199051	0.385588	0.153175	-0.264373	0.792578	0.0134306	0.000154018	-0.471159	0.0302429	-1.0628	-0.194422	-0.794461	-0.0888453	-1.24511	0.101154	-1.3604	0.354921	-0.107027	0.417502	0.0233746	-1.02283	-1.39246	-0.744922	-1.53059	0.918891	-0.0927095	-1.71731	0.511079	-1.36528	-0.203832	-1.17087	-0.573713	-0.966846	-0.683172	-0.055233	0.0611224	-1.22072
385	-0.0792089	-3.19081	-0.168664	-0.676313	-0.128724	-1.1422	-0.0429993	-0.570717	-0.192065	-0.573424	-0.431344	-2.73802	-0.358371	-2.76679	-0.788582	-0.719561	-0.178346	-0.58008	-0.311947	-0.636631	-0.265707	-2.58967	-0.0161276	-0.686147	-0.410618	-1.45535	-0.0854163	-0.986784	-0.0689936	-0.865	-0.122704	-0.0395908	-0.775803	-2.00045	-0.598336	-0.274199	-0.306743	-0.0435791	-2.91485	-0.395771	-1.03801	-0.900705	-2.93056	-0.347081	-0.553543	-0.761068	-0.749473	-0.782835	-2.85499
386	-2.12616	-0.152357	-2.81608	0.310884	-0.533427	-0.121918	-2.41998	-0.848705	-2.64664	-2.10535	-2.40696	0.0160275	-2.72971	-2.16688	-1.93133	-0.451273	-3.45365	-0.527905	-2.87482	-0.0537848	-2.7592	-0.699934	-2.6573	0.171865	-0.678328	-2.4702	-0.709178	0.794613	-3.03946	-1.96052	-3.09288	-0.433595	-3.11818	-0.20451	-2.93713	-2.73105	-0.650573	-1.65071	-0.105408	-3.27729	-3.11964	-3.31758	0.323619	-0.488997	-0.554289	-2.33941	-0.903545	-2.48141	-0.0320387
387	-1.43136	1.32053	-1.06782	-0.0682945	-0.879469	1.05877	-1.02074	-0.800247	-1.24847	-0.960813	-0.917701	-0.142046	-1.48521	-0.823092	-1.10674	0.00951147	-1.12446	-1.92034	-1.04258	0.234677	-1.46018	-1.62832	-0.32933	1.22748	-1.19578	0.826605	-1.08433	0.7235	-1.75373	-0.782274	-1.5417	-0.406799	0.778004	0.779739	-1.13564	-1.7346	-1.7336	-0.946416	2.73505	-1.25353	-0.71778	-0.561977	1.29618	-1.88784	-0.756553	-1.90177	-1.65679	-1.27023	0.0478325
388	3.39594	4.37221	3.36336	4.52668	3.57599	4.69649	2.8686	3.37606	3.4911	2.98569	3.41287	4.89658	3.00758	4.04752	2.62914	4.02149	3.30304	3.58621	3.79919	4.55467	3.32057	3.23014	3.52256	4.36364	3.39814	4.64068	3.46216	5.6189	3.80259	4.01595	3.07716	4.0849	4.45588	4.25237	3.15718	2.81038	3.42787	3.27647	5.42535	3.00122	3.3727	3.65877	5.08611	3.68635	3.81469	2.60999	2.61981	3.71232	5.57083
389	-0.633852	-2.27304	0.24523	-1.37659	0.157233	-1.59274	-0.593813	-0.374779	-0.170222	-1.53752	-0.593651	-3.07625	-0.580006	-2.54593	-0.245054	-1.15064	-0.0747709	-0.44761	0.173063	-1.37642	-0.204505	-2.25485	-0.313473	-0.918051	0.457643	-2.08829	0.402365	-1.13519	0.0831184	-0.2049	-0.442122	0.458599	-0.696176	-1.14688	-2.88565	-0.606022	-0.726841	-0.502454	-1.79353	-0.0355234	-0.526438	-0.485019	-1.77332	-0.856714	-0.830487	-1.07992	-0.869946	-0.280671	-1.17463
390	1.81999	1.63618	1.1034	2.25968	1.54692	2.02144	0.773329	1.74394	1.53169	0.924224	1.38283	1.74402	0.814713	2.2036	1.21756	2.22214	1.06099	1.94384	1.44566	1.91209	0.998395	1.74525	1.38093	2.92442	1.4511	2.98334	1.5113	2.16765	1.25734	2.12095	0.965112	2.02801	1.8447	1.34165	1.3302	0.732051	0.694905	1.02567	2.39071	1.15695	1.40527	1.48971	1.97078	1.79996	1.89104	0.782461	0.941972	1.41954	1.57081
391	1.72706	3.44214	1.96224	2.58802	1.72934	2.4716	1.3508	2.15845	1.42981	1.32616	2.6135	2.2973	1.77742	2.71135	0.638812	1.95221	1.85509	2.33618	1.83643	2.44215	1.61054	2.96731	1.52335	3.01467	1.64944	2.4959	1.86673	2.55984	1.89403	2.39324	1.20769	2.00046	2.7596	2.28217	1.94006	1.41924	1.59214	1.44125	3.69998	1.5738	2.34548	1.73003	2.81389	2.13389	2.10075	1.33318	1.4383	1.70392	2.33737
392	-1.22048	-0.442196	-1.14412	-3.10068	-1.79955	-1.2967	-2.19054	-2.77028	-2.14633	-2.904	-2.71314	-1.23366	-2.45672	1.01075	-1.54221	1.57184	-1.5063	-0.373032	-2.236	-1.50866	-4.02355	-0.360441	-1.19947	-1.32054	-1.02363	0.823621	-3.0868	0.743258	-0.913954	-0.499505	-1.43179	-1.31073	0.0230751	-0.429401	-0.489231	-3.26976	-2.42833	-2.1115	1.28025	-2.92693	0.913502	-1.44963	0.569925	-0.696967	-1.05859	-2.22241	-2.57438	-2.38589	-1.53443
393	-0.583675	1.77316	-0.600859	1.40449	-0.836451	0.6239	-0.883291	0.726439	-0.507536	-0.00301552	-0.511376	0.834314	-0.636461	-0.896893	-0.699449	-0.785738	-0.48875	-0.374319	-0.515532	0.570884	-0.737729	-1.04029	-0.857656	0.573562	-0.307437	-1.04033	-0.362265	0.22047	-0.665406	1.27948	-0.692985	-0.374822	-0.50413	-0.318149	0.218841	-0.748227	-0.771314	-0.819975	0.560575	-0.814516	-0.0439463	-0.359554	0.848432	-0.39605	0.0173836	-0.952877	-0.52346	0.259419	0.699112
394	1.23551	1.29734	1.26476	3.07543	1.48219	3.00357	0.575813	1.20415	0.338661	0.334812	0.954597	1.94606	0.0263672	1.59845	1.20717	2.19646	1.25498	1.9038	1.32495	2.51892	1.29129	1.24488	1.09204	3.33083	1.57517	2.66304	2.08964	2.95069	1.68218	1.59549	0.196376	1.16127	2.39565	1.55	1.58358	0.755389	1.20861	1.04775	3.15228	0.663484	1.45649	1.95791	2.89146	0.484276	1.89468	0.348041	0.267914	1.45425	3.24265
395	-2.61755	1.82326	-2.43933	-0.58385	-2.7857	0.238461	-2.01288	-2.73557	-2.40243	-1.07865	-2.25928	0.60898	-1.99441	-1.64606	-2.46515	-2.32383	-2.13451	-2.0946	-1.94277	-1.30343	-2.22662	-2.29164	-2.06014	-1.10066	-1.92411	-1.55441	-1.84465	-0.508746	-2.15004	-1.721	-2.64077	-1.51488	-1.33385	0.418754	-1.29939	-2.3629	-2.17055	-2.25239	-0.277384	-2.64777	-1.58216	-1.34221	-0.440585	-2.0437	-1.18986	-2.19478	-2.15548	-1.76732	-0.4202
396	2.26471	3.30074	2.12314	2.72674	2.15559	2.92128	1.81776	2.36991	1.95992	1.80381	2.43947	3.27156	1.84521	2.69141	1.57134	3.0951	2.17505	2.24679	2.30512	3.06287	2.01568	2.58587	2.28018	3.09464	2.16248	3.36255	2.51502	3.61248	2.39673	2.63008	1.55489	2.36437	3.44137	2.11023	2.2538	1.89727	2.00962	2.04505	3.09974	1.86506	2.566	2.63823	2.87439	1.90407	2.46018	1.45573	1.81425	2.35764	3.90198
397	3.35387	1.1746	3.21054	3.10182	3.4322	2.32826	2.80167	2.33889	2.79148	1.42589	2.2216	1.51828	2.94435	0.789395	2.59028	1.53564	2.72887	2.88184	2.77686	2.70659	2.9842	0.585213	3.11569	2.56235	3.21206	0.470081	3.08872	2.80668	3.2248	3.09577	2.77881	2.87078	1.40544	2.24362	1.39534	2.30059	2.97696	2.98526	2.57727	2.63954	1.34941	2.79572	2.36713	2.72107	1.67473	2.50728	2.20959	2.89991	2.34257
398	2.92209	1.03904	1.97598	1.93222	2.58293	1.2914	2.26641	1.18306	2.67159	1.66612	1.73604	0.762989	2.17587	1.61266	2.04826	2.03545	2.1168	1.76877	3.53584	2.49293	2.31685	1.34283	3.21601	2.0629	1.73843	0.76727	2.13905	0.736293	2.65701	2.21396	2.76374	2.93857	0.760398	1.08852	1.48099	2.35684	2.19862	2.72838	1.15384	2.2844	1.40458	1.54255	0.709298	1.917	1.45274	1.65967	1.46012	1.06751	0.213305
399	2.04364	2.81396	1.5735	2.80494	1.88552	2.93192	1.0348	1.7277	1.98213	1.13823	1.53978	2.77936	1.29957	2.47297	1.60134	2.42151	1.72935	1.83451	2.17442	2.76987	1.82785	1.5032	1.84218	2.62991	1.82296	3.14209	1.86566	3.57864	2.15833	2.44442	1.55887	2.30629	2.79782	2.4069	1.52671	0.983278	1.58878	1.48306	3.16287	1.45175	1.82208	2.23468	3.21934	1.66867	2.28237	1.36714	1.55736	2.0201	3.51835
400	1.0768	1.28857	0.863394	2.17124	1.00745	2.36726	0.565807	1.27158	1.10995	0.913882	0.984189	2.07262	0.613988	1.50313	0.752973	1.72182	0.853484	1.29274	1.40115	1.81147	0.988146	1.08094	1.25895	2.24381	1.27703	2.22188	1.11452	2.30511	1.49419	1.73623	0.722525	1.59785	2.08769	2.06078	1.25886	0.654868	0.883814	0.8967	2.83377	0.954317	1.21907	1.36994	2.12951	1.07881	1.52374	0.523047	0.78854	1.19128	2.24142
401	-1.29626	0.477179	-3.27649	0.352362	-2.87736	0.0328617	-3.05918	-0.18112	-1.31905	-0.141505	-0.54667	0.455614	-2.1491	-2.12617	-2.22943	0.255709	-2.74527	-0.33143	-3.13512	-0.635267	-3.05978	-1.93606	-3.48101	-0.749345	-1.33829	-2.10721	-1.1186	-0.668624	-0.294959	-0.603727	-2.13598	-0.807324	-2.73201	-0.836936	-0.266829	-3.15602	-0.673193	-2.6041	-0.134887	-0.782171	-0.757856	-0.506159	-0.214666	-0.314407	-0.668072	-1.97011	-3.27278	-0.617354	0.06359
402	0.442549	-2.57944	0.096415	-1.21165	0.323081	-1.12485	-0.65057	-2.59669	-0.175611	-2.73879	-0.253319	-1.15303	-0.666463	-1.14566	-0.313207	-1.11455	-0.0183725	0.000130653	-0.0455899	0.0882316	0.296038	-2.35669	-0.595862	-0.725271	0.079051	-0.608346	-0.0546107	-0.4391	0.247333	-0.646751	0.1485	0.0426722	-0.730837	-1.12006	-0.941685	-0.161005	0.0799685	-0.260569	-1.42709	-0.183085	-0.523375	0.12349	-1.2444	-0.236677	-0.90432	-0.468419	-0.33196	-0.285768	-0.713233
403	2.33759	3.41115	2.32735	3.78442	2.49721	3.72056	2.17092	3.35347	2.54917	2.39013	2.20369	3.95137	1.9724	2.62348	1.90306	2.85198	2.36679	2.53516	2.64924	3.49866	2.31091	1.79768	2.74287	3.96892	2.43797	2.67311	2.52489	3.42141	2.77844	3.24155	2.20189	2.77643	2.95382	2.32714	2.84022	2.0177	2.4711	2.33893	4.01471	1.92837	2.63881	2.90513	3.54371	2.31206	2.96589	1.52508	1.88501	2.74265	3.78597
404	-0.570264	-0.331944	-0.475154	0.384798	-0.563091	0.346318	-1.12485	-0.425059	-0.742589	-0.962918	-0.622003	0.0565491	-0.941133	0.192951	-1.83099	0.0202346	-0.517456	-0.233876	-0.400978	0.207705	-0.640117	-0.0345778	-0.622873	0.93505	-0.894257	0.630059	-0.586465	0.50997	-0.480039	-0.302866	-1.64136	-0.73218	0.489322	0.241409	-0.806783	-1.26415	-1.03878	-0.990191	0.838672	-1.19049	-0.152971	-0.784109	-0.0139027	-0.385607	-0.461884	-2.17605	-1.05527	-0.50833	0.553573
405	-2.5485	-2.33141	-2.06381	-1.13788	-2.53684	-1.25149	-2.51554	-1.4282	-3.56039	-2.74511	-2.83818	-2.77357	-1.90333	-0.730911	-3.39002	-1.72953	-2.96142	-1.97546	-2.19405	-1.12102	-1.5752	-1.32248	-3.81347	-0.984777	-2.64555	-0.447008	-2.18996	-0.470835	-1.6988	-1.33329	-2.45655	-1.47724	-0.5631	-0.609879	-3.01826	-2.63729	-1.22536	-1.95609	-0.960402	-2.95616	-1.33745	-2.09783	-0.838772	-3.57237	-3.42943	-2.76228	-2.58525	-1.91015	-0.692657
406	1.03559	2.40564	0.532346	2.1903	0.825283	1.67991	0.208728	1.69636	0.67484	1.06246	0.396814	1.42421	0.655576	0.87083	0.0858483	0.70865	0.713554	1.01646	0.250317	1.41794	0.953321	0.760951	0.616332	1.76894	0.986345	0.478654	0.903012	1.5912	0.904019	1.82362	0.174142	0.757694	0.972597	1.0641	1.23605	0.14668	1.10996	0.613079	1.79156	0.698246	1.21811	1.47894	2.04426	0.741865	1.09014	0.520962	0.850327	1.40369	1.73316
407	3.76864	1.37521	3.37844	2.86739	3.37404	2.46848	3.22478	2.82225	3.1179	2.48932	3.02249	1.3197	3.23988	2.20224	3.02174	2.47762	3.22055	3.00578	3.68396	3.22767	3.20732	1.67458	3.74955	3.208	3.35223	2.44003	3.52478	2.54154	3.47428	3.15205	3.3697	3.7212	2.94177	2.61703	2.61539	3.36253	3.76862	3.68999	2.50091	3.0667	2.7352	3.12911	2.02974	2.72556	2.88671	2.47556	2.56324	2.74206	2.10842
408	-0.330178	3.37461	-0.979659	0.888782	-0.219027	2.42856	-0.674546	-0.721241	0.0099659	1.15005	-0.682709	1.98727	-0.895308	0.18856	-0.0816617	0.0157266	-0.254423	0.0163746	-0.499259	0.985847	-0.83154	-0.343547	-2.14371	-0.217653	-0.554255	-0.338082	-0.942999	1.47586	0.802723	-1.11569	-0.0288281	0.187378	-0.156695	-0.41149	0.392959	-0.833556	-0.222854	-0.579873	0.585708	-1.55932	-0.738378	0.232605	1.34249	0.178168	-0.10162	-2.26978	-0.965796	0.306971	1.55966
409	-0.521911	4.60849	-0.723191	1.9958	-0.201044	0.243427	-0.929841	-0.141792	-0.403605	1.48258	0.551416	2.8292	-1.13076	0.224698	-0.410079	0.809432	0.115537	0.904261	-0.763155	0.415118	-0.673354	0.200302	-1.3648	-0.124444	-3.17154	0.0827227	-0.0650468	0.253675	-0.667571	0.161891	-0.721154	0.611044	-0.309967	-0.747381	1.39983	-0.625285	-0.1131	-1.07893	2.26795	-0.344633	0.355814	0.0868807	-0.182797	1.07821	0.194198	-0.226596	-0.0443153	-0.102891	0.832439
410	1.38542	0.26659	2.08025	0.540397	1.92241	0.210033	0.840278	0.261841	1.19564	-0.103688	0.364421	-0.556487	0.868124	0.0924931	1.61201	0.681875	0.895893	0.882186	1.14378	0.303524	1.60106	-0.439686	0.778178	0.789858	1.11312	0.175443	2.24441	0.618699	1.70741	-0.181236	1.75325	1.16451	0.655145	0.510178	-3.36374	0.66867	1.99541	1.31539	0.486763	1.42746	-0.0531969	0.616644	0.591392	1.28436	0.643099	1.50716	1.09824	0.689966	0.345579
411	-2.07875	-0.88104	-3.19008	0.036602	-1.80501	0.241902	-1.60756	-0.0241575	-3.36371	-1.65637	-2.23718	0.1985	-3.03625	-2.94032	-2.29264	-2.41729	-2.00003	-1.74793	-1.55946	0.635179	-1.8034	-2.12004	-0.69387	0.258064	-1.13148	-2.07308	-1.24588	-0.21124	0.312242	-1.30047	-2.84824	-1.94177	-1.45959	-1.5762	-0.20906	-3.11855	-2.12836	-1.75874	0.418815	-2.33069	-0.951797	-0.849752	-0.892768	-2.63348	-0.831104	-3.40178	-1.87341	-0.849716	-0.0181408
412	-0.119217	0.783346	-0.226928	0.673461	-0.167922	0.580778	-0.625542	0.295338	-0.045125	0.0819321	-0.429849	0.815241	-0.335023	0.110482	-0.467391	-0.185638	-0.298383	-0.064085	-0.305778	0.490946	-0.424225	-0.305976	-0.155806	0.37174	-0.202969	0.269735	-0.20319	0.424586	-0.0506525	0.365328	-0.459028	0.0473909	0.392199	-0.279103	0.219229	-0.69683	-0.474	-0.467921	0.375441	-0.33871	0.0977793	0.287245	0.587381	0.0550852	0.378197	-0.676331	-0.308431	0.187239	0.843731
413	-1.55314	0.08918	-1.77982	-0.479463	-1.79107	-0.231671	-1.94773	-1.22631	-1.91178	-1.65305	-1.27484	-0.0693579	-1.79004	-0.931832	-2.2085	-1.11284	-1.85962	-1.57779	-1.76064	-0.56467	-1.72532	-1.94663	-1.62622	-0.703856	-1.80084	-1.24489	-1.47984	-0.450688	-1.50252	-0.91526	-2.03341	-1.2191	-1.6073	-1.45194	-1.08925	-1.35329	-1.24656	-1.89433	-0.317586	-2.16783	-2.09998	-1.44418	-0.59906	-1.62099	-1.3994	-1.79606	-2.00053	-1.42868	-0.689729
414	1.77024	0.931657	1.87144	1.15562	1.87749	0.997792	1.21786	1.19292	1.5788	0.812004	1.56173	0.620105	1.68291	0.668419	1.42504	0.917458	1.58446	0.822068	1.76444	1.55884	2.01444	0.867924	1.78967	1.37153	1.60028	1.20059	1.72546	1.12514	1.76719	1.12715	1.38197	1.49265	1.22742	1.73892	1.07055	1.36847	1.44942	1.72726	1.35839	1.46905	1.07586	1.37497	1.00549	1.97094	0.996121	1.4365	1.19587	1.04693	1.14318
415	-1.85527	0.611238	-1.77863	-0.284096	-1.4563	-0.796366	-2.06054	-0.415117	-1.64444	-1.46047	-1.87895	-0.502581	-2.16733	-0.778762	-2.22862	-1.86608	-1.86258	-1.6292	-1.55425	-0.657199	-1.79552	-3.17052	-1.91133	-0.417365	-1.8428	-2.11673	-1.80179	-1.06307	-1.53134	-0.429209	-1.96911	-1.56093	-1.44897	-1.95686	-0.924944	-2.52828	-1.75399	-2.51797	-0.620541	-3.28386	-1.71611	-1.2931	-0.610024	-2.31657	-1.49399	-2.10355	-1.97164	-1.27002	-0.764205
416	2.51558	3.40455	2.17806	3.42739	2.35286	3.72291	1.75057	2.27552	2.20323	1.80731	2.06392	3.0322	1.61111	2.74122	1.88511	2.89654	1.81928	2.43033	2.60037	2.65457	1.81803	2.0982	2.42628	3.63497	2.34627	3.12297	2.24862	3.83494	2.40895	2.96916	1.50054	2.68176	2.81457	2.45094	1.67177	1.60232	1.84051	1.79488	3.48965	1.64222	2.27339	2.18727	3.4205	2.2775	2.40076	1.71037	1.87179	2.13952	3.18312
417	0.278185	-2.52524	-0.0384345	-0.872958	0.0555291	-1.54939	-0.720797	-0.486478	-0.605007	-1.00176	-0.507145	-3.26029	-0.652914	-2.31133	-1.07499	-2.29039	-0.395418	-0.86715	-0.768455	-1.07727	-0.28459	-2.25559	-0.681563	-1.03187	-0.314794	-2.40675	-0.311622	-1.4701	-0.377513	-0.555147	-0.315955	0.0547848	-2.539	-1.02149	-1.0758	-0.746338	-0.29974	-0.196355	-1.51307	-0.936371	-1.29009	-0.870568	-1.31362	-0.975032	-1.31713	-0.613106	-0.784007	-0.823708	-1.25499
418	-3.06748	-1.19996	-0.408699	-0.786354	-3.4718	-0.687974	-2.69635	-0.861285	-1.54462	-1.4845	-2.10869	-0.247713	-2.02748	-0.800427	-1.24626	-0.491587	-2.97456	-1.54189	-0.865604	-0.739298	-2.26088	-1.28395	-1.65073	-0.672628	-1.13534	-0.578407	-1.77043	-0.61863	-1.90663	-1.02529	-2.80956	-1.66193	-0.656118	0.110632	-1.11582	-1.83068	-1.21387	-1.09892	0.693023	-3.32176	-0.833067	-0.862522	-0.400499	-3.38506	-1.08965	-2.27396	-1.09323	-1.21283	-0.79389
419	-2.76338	-0.361587	-2.53792	0.231724	-2.24922	-0.427832	-1.9179	-0.071085	-0.728872	0.220145	-3.08861	-0.112812	-2.89815	-0.402586	-2.23527	-2.79075	-2.29762	-0.511022	-2.97666	-0.412748	-3.1814	-2.67027	-1.1935	-0.378576	-1.35985	-2.0887	-0.957771	-0.00453758	-3.186	-0.000636101	0.971633	-0.821846	-0.672833	-2.26469	-0.526965	-2.71316	-2.16713	-0.84171	-0.609492	-3.31991	1.50682	-0.631912	-0.380225	-3.45388	-2.15874	-2.26921	-1.87336	-0.497348	-0.321225
420	-0.0315738	3.06611	-0.404992	1.82264	-0.77488	1.3756	0.322685	0.337365	0.43767	2.06888	0.623283	3.05997	-2.1966	0.977275	-0.0925593	0.155098	-2.40391	0.892567	-0.687726	1.04172	-2.69165	-3.76546	-0.665385	0.113929	-1.98215	-0.145233	0.433829	0.132342	-3.4523	0.0284052	-0.286245	0.61126	-0.255018	0.0132484	0.355348	-2.51128	-2.29223	-2.505	0.974459	-3.14198	0.788207	0.836698	0.768666	1.27214	0.260906	-3.8049	0.138948	0.84812	0.799351
421	4.0016	3.70094	3.58783	4.66811	3.86396	4.86215	3.17932	3.72331	3.40632	3.19802	3.48077	4.3375	3.27262	4.14246	3.201	4.18044	3.49417	4.11491	3.7263	4.33913	3.61106	3.61957	3.65501	4.72412	3.70824	4.65266	3.59703	4.99241	4.01142	4.30416	3.0663	4.10616	4.4755	4.60488	3.64005	3.2088	3.40005	3.53522	5.37462	3.15886	3.91675	3.91685	4.68902	3.32922	3.97918	3.06069	3.25237	3.67916	4.75704
422	-0.21218	2.90646	-0.492673	0.745423	-0.206919	1.27296	-0.392653	0.111504	0.154048	0.555522	-0.223006	2.10413	-0.425087	0.111715	-0.0891185	0.110569	-0.235559	0.264116	-0.690855	0.350493	-0.602786	-0.402883	-1.01012	-0.159057	0.259097	0.271935	-0.213832	0.654542	0.347378	0.26574	-0.387679	0.378702	0.177452	0.0582705	-0.034318	-1.19852	-0.50384	-0.715775	0.508291	-0.248552	0.243942	0.546622	1.01171	0.0364456	0.136094	-0.667707	-0.26112	0.616761	0.887079
423	-0.245663	-3.25757	-0.209095	-2.19212	-0.00689745	-0.321783	-3.23403	-2.74969	-0.00666523	-2.45153	-2.58748	-1.58163	-0.653689	-1.2909	0.00757647	-2.70727	0.161683	-2.48473	-0.365151	-1.37358	-0.310081	-3.47144	-3.11845	-3.2494	-0.0167046	-2.32747	-0.335725	-2.98758	-0.040307	-0.817515	-0.7205	-0.277658	-2.72142	-2.49694	-2.05351	-3.3077	-0.608918	-1.06819	-0.487164	-0.0538673	-2.72452	-2.16776	-2.02709	-0.344823	-2.73809	-0.626448	-0.974217	-0.180315	-3.41986
424	0.529554	0.866369	1.35112	3.32243	1.38375	4.03433	1.60284	1.88691	0.915691	1.86512	1.93983	0.823195	0.646506	1.98882	-0.418849	3.8511	2.08547	2.15383	1.98295	2.85205	0.454733	0.340683	2.24945	3.05451	1.30789	4.21207	2.75336	4.22133	0.952357	0.5121	1.33934	2.77707	3.73946	0.615167	1.93654	1.4881	0.991924	2.61288	5.24543	0.998313	2.53656	1.8575	4.52123	0.381598	2.3695	-0.357435	-0.53537	0.444965	4.14087
425	-2.34218	0.626115	-2.69175	-0.131236	0.152618	-0.498755	-2.34495	0.109725	-0.0357933	-2.76101	-3.43535	0.399682	-2.76364	0.289635	-1.92781	0.412424	-3.75536	-2.80799	0.162062	0.380523	-2.35934	-2.95238	-3.34044	0.672384	-0.0198956	1.05756	-2.45869	0.537681	0.147047	0.487361	-2.96618	-0.62321	0.71726	0.777847	0.165943	-2.17415	-2.88656	-2.72162	0.183868	-1.90352	-3.52686	-0.0414677	0.720335	-3.47739	0.643971	-2.27448	-2.41818	-3.65737	0.29954
426	-2.95451	-0.617136	-2.93135	-0.230029	-1.80321	0.00158882	-2.49655	-0.135633	-1.77121	-1.84667	-2.82381	-0.474082	-2.14955	-3.14365	-2.70272	-0.363951	-0.869006	-0.421996	-2.47586	-0.424242	-2.76993	-3.05867	-2.89271	-0.390064	-0.754153	-0.298507	-0.462107	0.0533762	-2.26346	-0.0804806	-0.291518	-0.606807	0.195058	0.299873	-3.52615	-2.30344	-2.84112	-3.76369	-0.385909	-1.56692	0.20829	-1.52904	-0.10594	-1.22752	-0.631351	-0.0919838	-1.88429	-0.478327	0.0292587
427	0.202165	0.354886	-0.0780444	0.219838	-0.106656	0.299844	-2.49924	1.7709	0.235218	-3.03349	1.2313	-2.19669	-3.02687	0.119331	-2.44801	-0.0434184	-2.71488	0.0221024	-3.01684	-0.0917783	-2.91179	0.237333	-3.2067	0.468559	0.47716	1.66808	0.896837	0.171146	0.441696	0.307171	-2.82555	0.438717	0.331211	0.0684385	1.75338	-3.16743	-2.6859	-0.315771	0.342907	-2.77611	-2.36768	-1.95525	0.197716	-2.12098	1.65483	-2.56212	-2.76358	-2.45089	0.251709
428	0.198946	-2.22015	-1.0801	-0.969378	-0.385293	-2.83397	-1.10746	-1.5255	-0.643984	-3.09796	-0.956986	-1.78365	-0.532486	-2.42823	0.186543	-2.21351	-0.186463	-0.339841	0.100622	-0.536291	-0.634096	-1.00241	-0.623454	-1.22327	-0.264014	-2.41493	-0.735869	-1.08399	0.0203409	-0.916706	-0.654531	-0.0340796	-3.55478	-1.32224	-1.34015	-1.40896	-0.133456	-0.837296	-2.95079	-1.48574	-2.30271	-0.684532	-2.58254	0.123602	-1.09043	-1.03723	-0.385107	-0.494813	-1.2629
429	4.69125	5.07541	4.81223	5.98888	4.29146	5.41631	4.89682	5.99667	4.58213	4.88203	5.24199	5.18516	4.12764	4.51096	3.20881	5.53383	4.56116	4.8773	5.4855	5.72644	3.9578	5.62981	5.3712	6.47389	4.47675	4.98376	5.68301	5.53692	4.6693	5.45435	4.08071	5.72484	7.05578	4.55119	5.178	4.79709	4.16705	5.16292	6.397	4.54132	5.69152	4.97309	5.6302	4.27278	4.82871	3.04489	4.0199	4.44578	6.45092
430	0.681826	3.76787	0.633927	1.45888	0.607625	2.30763	0.362893	0.406521	1.38082	0.113823	0.743637	3.1145	0.0453815	2.36214	0.679622	2.07422	0.699798	0.899078	1.54195	1.773	0.651631	1.0201	0.665602	1.05068	0.851138	3.20755	0.792622	2.97479	1.1613	0.76316	0.574965	0.889805	2.35044	0.947061	0.332558	0.268475	0.884878	0.463058	2.09877	0.351033	0.776153	1.19941	2.42055	0.888786	1.40609	-0.556058	0.497092	0.86705	3.50834
431	0.50288	1.77607	0.643555	2.35289	0.230353	2.02978	0.297309	1.73224	0.218899	-0.332636	0.253008	0.583323	0.180015	0.543943	-0.0667262	0.826839	0.236089	0.666778	0.0236011	1.23581	0.146061	1.11654	0.844012	1.84619	0.621119	0.095953	0.13739	1.96388	0.81859	2.42935	0.48715	1.00622	0.949137	0.981161	1.40445	0.250045	-0.429951	0.146466	0.90185	0.143037	-0.0766897	0.865188	1.80518	0.214308	0.668761	-0.462425	0.59242	1.00963	1.15895
432	1.3639	1.7762	1.1725	2.18728	1.08805	2.51388	1.07196	1.60782	1.47818	0.999432	1.24213	2.1106	0.820845	1.76867	0.984009	1.54195	1.07754	1.19354	1.64874	1.89008	1.26094	1.24092	1.36676	2.22822	1.39476	2.34006	1.35216	2.42123	1.51008	1.84456	1.03748	1.85212	2.03142	1.99742	1.33152	0.806691	1.06102	1.19843	2.56597	0.986277	1.53578	1.64768	2.29509	1.24173	1.68747	0.703557	1.02637	1.25666	2.24203
433	0.756332	0.301762	0.211066	-0.0305071	0.893213	-0.633902	-0.360011	-0.916296	0.68661	-0.645723	0.186851	-1.33754	0.232821	-1.24004	0.777865	-0.012466	0.912805	0.532396	0.233814	0.384286	0.379402	-1.05112	0.27116	0.0873513	0.333563	-0.667351	0.48385	-0.231731	1.18513	0.261492	0.45267	0.541022	-0.862082	-0.464763	-0.81727	-0.233301	0.533272	0.36941	-1.05979	0.233883	-0.243279	0.424945	-0.684355	0.719856	-0.38943	-0.382879	0.0143328	0.900393	-0.569221
434	-2.57764	-0.493117	-0.305917	-0.433642	-2.57131	-0.193988	-0.610474	1.19337	-0.735214	-0.600652	0.320343	-0.876595	-3.10487	-1.90102	-2.26118	-2.65089	-3.40409	-2.75019	-0.399767	-1.12204	-2.62812	-0.935484	-2.41932	-0.107251	-2.13211	-1.02447	-0.30811	1.46743	-2.07415	-1.59073	-1.84365	0.142179	1.61325	-2.96769	-2.20822	0.209488	-2.81642	-2.04027	1.06747	-2.79753	0.292741	-2.18648	1.51263	-1.58373	-2.63585	-2.34976	-2.12294	-0.582148	0.849632
435	3.012	0.414836	2.88703	1.98434	2.98371	2.46517	2.09316	1.84733	2.47124	1.25973	2.21553	1.08828	2.45145	0.749496	2.02272	0.832778	2.04158	1.7094	2.16749	1.89303	2.76228	0.881867	2.03386	1.87697	2.78418	1.08774	2.22651	1.83787	2.49706	2.31509	2.47311	2.9212	1.2993	3.78902	1.46237	1.78577	2.16689	1.85158	0.897965	1.87763	0.998845	2.15693	1.80462	1.72744	1.0793	2.39279	1.85884	2.04623	1.23424
436	-0.671856	-2.46703	-0.261543	-1.66922	-1.18987	-1.93283	-0.990879	-1.41897	-0.0437498	-1.29504	-0.778684	-3.19698	-1.30699	-1.57416	-0.679669	-0.901904	-0.99404	-1.15521	-0.0394454	-0.834645	-0.245564	-2.87206	-1.15039	-2.35671	-0.308965	-1.2622	-1.20856	-2.45039	-0.0510893	-0.569314	-0.0904679	-0.0985508	-2.59877	-1.9422	-1.66698	-0.804293	-0.281054	-0.808861	-1.69257	-0.306473	-1.43929	-0.935841	-1.34696	-1.34569	-0.984129	-1.25019	-0.614654	-1.49471	-2.37999
437	0.375336	-0.0517187	0.385287	1.71754	0.227555	1.22735	0.175934	1.48695	0.213607	0.57459	0.433687	0.845451	0.0180359	0.533609	-0.00446844	0.53401	0.369396	0.583755	0.153097	1.42327	0.326673	0.369296	0.260017	1.30132	0.695274	0.684029	0.525649	0.743392	0.713628	1.39174	0.210343	0.577242	0.806551	-0.218858	0.666692	0.00283718	0.19767	0.0512018	1.43557	0.259052	0.265117	0.706325	1.2666	0.272757	0.864975	0.178936	0.196854	0.735651	1.24536
438	1.52907	-0.46737	1.9199	0.923491	1.64519	-0.797719	0.647825	0.830104	1.69331	-2.20904	0.405316	-1.93261	1.35178	-3.19582	0.98085	-2.46577	0.482041	0.472106	1.65318	-0.00825834	0.979805	-1.66545	1.16131	1.46298	0.927274	-1.40236	2.17246	1.25915	1.62522	-0.124115	0.804238	0.741017	0.906513	-0.378655	-1.4549	-0.169102	2.25796	1.43184	-0.140864	1.44971	-1.36874	-0.465996	0.394951	1.36121	-0.368648	0.0829077	0.889254	2.04273	1.68732
439	2.35326	2.559	2.16089	3.10901	2.59318	2.98017	2.0633	2.81084	2.5022	2.32972	2.25451	3.01348	2.2628	4.02073	1.68795	4.5456	2.35455	2.68529	2.75174	3.84446	2.18196	3.78646	2.77139	3.31617	2.30849	4.20333	3.27887	3.86101	3.1966	3.35046	2.09812	2.54362	3.48737	2.14508	2.39311	2.39622	2.47132	2.7814	3.70233	2.13812	2.97696	2.96897	3.06852	2.39542	3.33836	0.896874	2.6015	3.10735	3.05231
440	1.64685	-0.312035	1.62883	1.09379	1.85814	0.201073	1.26654	1.05261	0.317792	0.132648	0.451981	-0.523955	1.30358	-0.66225	1.2574	0.486399	1.19401	0.648204	1.24597	1.2112	1.48521	-0.608376	1.41418	1.31444	1.35823	-0.182631	1.24579	0.272267	0.968124	0.980979	0.588876	1.04153	0.628105	0.409265	0.690582	0.816896	1.89316	1.56327	0.381141	0.912294	-0.0789442	1.03631	-0.0613413	0.775087	0.405279	0.422955	0.506366	1.04072	-0.094491
441	2.26515	-0.185997	1.77699	1.38034	2.09094	0.650636	1.73692	1.5283	2.04173	0.348422	1.96641	-0.473646	2.04842	0.719538	1.94776	-0.29697	1.82872	1.76339	2.50802	1.3642	1.98947	1.74314	2.6403	1.99168	1.54556	0.798025	2.21007	1.0423	1.94617	2.14852	1.861	2.27798	1.84456	1.57784	1.15315	1.64015	1.71266	2.00348	0.594963	1.82447	1.43839	1.94308	-0.092617	1.89502	1.77923	1.57252	1.66511	1.72325	-0.701247
442	-0.131644	-1.07648	-0.483725	-0.628127	-0.183827	-2.39015	-1.03919	-0.831752	-0.834352	-2.9149	-0.0646858	-2.80841	-0.324419	-2.29387	-1.06561	-1.04529	-0.555373	-0.735112	-0.640184	-0.430765	-0.578481	-3.48276	-0.405328	-0.3674	-0.695834	-2.62147	-0.302927	-1.31657	-0.548627	-0.436275	-1.11641	-0.643394	-2.79409	-0.887196	-0.737803	-0.855745	-0.608511	-0.561623	-1.05713	-0.762381	-2.55679	-0.734076	-1.5065	-0.666327	-2.43897	-1.06171	-0.889592	-0.893591	-2.29663
443	1.62851	1.67766	2.00122	3.54001	1.86511	2.38527	1.56568	2.15382	1.8541	1.48906	1.51627	1.71289	0.631084	1.98414	1.13814	3.12949	1.37	1.86278	1.90858	2.38124	1.06923	1.39763	2.12419	2.53959	1.55294	3.52997	2.02995	4.42634	1.98722	2.5504	1.54078	2.4096	5.12292	1.76899	1.51063	1.46026	1.52836	1.99288	3.70303	1.49145	1.52353	1.97079	3.99447	1.45511	2.84343	0.285199	1.01366	2.14242	5.39453
444	0.0301948	-0.515682	-0.0793557	-0.516412	-2.53147	-0.168982	-2.84084	-2.24468	-2.9979	-1.45112	-0.711386	-0.780828	-3.25137	-0.451855	0.165711	-0.838666	-0.573305	-0.244108	-2.92163	-0.77529	0.0269642	-0.78502	-2.24369	0.0128217	-2.22283	-0.0591869	-0.424567	0.0800266	-0.514424	-0.472857	-3.32598	-1.22791	0.0137539	-0.207448	-2.13172	-3.63165	-2.73223	-2.12209	1.06995	-2.97453	-0.163739	-0.0327539	-0.303985	-1.38896	-0.354497	-2.15696	-0.359941	-0.577494	0.775761
445	-2.39982	-0.875361	-2.37516	-0.677907	-2.55231	-0.289555	-3.18082	-0.892461	-1.68238	-2.2491	-3.10608	-2.50887	-2.4629	-0.840521	-0.620538	-1.42757	-2.97872	-2.49513	-2.25445	-2.56758	-2.41734	-2.863	-2.82883	-0.0717406	-0.912321	-0.309866	-0.850599	-0.618059	-2.27303	-0.838818	-2.73463	-0.670063	-0.858522	0.0849085	-1.04271	-2.04769	-3.09542	-1.96389	0.158231	-2.34182	-2.94506	-0.356697	-0.527027	-2.31794	-0.810044	-1.81267	-0.93453	-2.16471	-0.770173
446	-0.0882878	1.53817	-2.75959	0.717726	-0.335514	0.726436	-0.865201	0.0844297	0.421334	-0.27095	0.241098	0.812679	-2.08682	0.682131	-0.559058	0.460966	-0.274496	0.0722351	1.36662	0.761117	-0.233231	-0.0679364	0.424555	0.901726	0.75942	0.915987	0.0367665	1.91603	-0.303272	0.728534	-2.84118	0.485037	0.740425	0.141378	0.0553617	-0.172969	-2.70151	1.10279	1.81258	0.155996	0.157731	-3.21749	1.2801	0.34108	0.271626	-0.120825	0.218946	0.00527143	1.21717
447	1.09475	-1.8025	-0.0946441	-0.0183496	-0.136033	-1.8509	1.08219	0.547769	-0.98599	-0.466333	-0.627836	-3.28399	0.411916	-1.15725	0.166104	-1.00153	0.278378	0.200201	-0.280642	-0.325481	0.626103	-2.85666	1.72063	0.284785	0.283675	-1.23524	0.592592	-1.51101	-0.0866537	0.15367	0.41284	1.38628	-0.688287	-0.880085	0.105967	0.385839	0.766603	1.12603	-1.86109	0.155354	-0.526629	1.40465	-1.28892	0.358713	-0.0696049	0.359886	0.86769	0.761984	-0.815006
448	0.495248	0.954368	0.304596	-1.08604	0.399051	-0.860065	-0.134871	-0.769176	-0.364231	-0.774357	-0.581237	-1.02679	0.140967	-1.00766	-0.0266376	-1.10119	0.248046	-0.107932	-0.915931	-0.985819	0.258997	-2.38876	-0.503233	-1.52834	-0.00998497	-1.05309	-0.0977559	-0.906478	0.317227	0.370093	-0.113636	0.186014	-0.873659	-0.142879	-0.819871	-0.265734	0.462709	0.118162	-0.336115	0.161778	-3.24246	-0.0340338	-1.3007	-0.160506	-0.713173	-0.0566139	-0.105111	0.0667834	-1.48394
449	1.54492	0.744006	1.28623	1.8733	1.73355	2.18779	0.731389	1.47769	1.24151	1.32866	1.42374	1.90443	1.02293	2.01645	1.12743	2.2825	1.23287	1.27829	0.837685	2.01225	1.47948	1.64716	0.597121	2.07196	1.40853	2.09507	1.60154	2.20519	1.37895	1.57049	0.792082	1.75549	3.22784	0.633927	1.54464	0.0973501	0.974815	0.786353	2.56489	0.626063	0.903501	1.37326	2.32696	1.24647	1.37931	1.05736	1.03723	1.24652	3.56426
450	-1.6053	-0.0244942	-1.85074	-0.974872	-1.77091	-0.602665	-1.32821	-1.30586	-1.37905	-0.760196	-1.07123	0.120028	-2.04039	-2.44369	-2.91236	-0.779985	-1.40796	-1.38079	-1.62418	-1.0722	-3.39547	-1.21028	-1.07617	-0.49763	-1.40057	-0.787294	-1.57952	-0.88672	-1.03632	-1.12628	-2.48615	-1.49037	-1.2969	-0.941601	-1.25252	-2.04536	-2.65806	-1.52559	-0.319592	-2.93099	-1.57773	-1.2765	-0.551695	-1.97866	-1.0772	-3.17523	-2.24417	-1.45495	-0.784009
451	-1.00846	0.598135	-1.45416	0.0145311	-1.06456	1.05932	-0.323628	0.0597868	-0.636346	-0.781772	-0.515342	0.676268	-0.65853	-0.116866	-0.87703	0.700273	-1.17047	-0.617841	-0.578947	0.168496	-1.20995	-0.332624	-0.669008	1.5306	-0.983855	1.8699	-0.940666	0.588447	-1.21864	0.115254	-1.13986	-0.195197	0.752468	1.28918	-0.12389	-0.891063	-1.48366	-0.551434	2.41605	0.782938	-0.114491	0.0553846	1.1895	-2.3796	-0.0143661	-0.748075	-1.19881	-0.689134	0.230197
452	0.515004	2.08301	0.09481	1.37959	0.333343	1.41809	-0.819916	0.630946	-0.2265	-0.248324	-0.299721	0.783829	0.0855999	0.13433	-0.991759	0.209074	-0.210062	0.198608	-0.307533	1.15639	-0.767048	0.0117726	0.420807	1.42696	-0.468187	-0.707282	0.00777578	0.862309	0.119708	1.27685	-0.773738	-0.00867653	0.365525	0.836555	0.22012	-0.769742	-1.00687	-1.11726	0.842997	-0.793224	-0.851262	0.0238085	0.78878	-0.02314	-0.182877	-0.807012	-0.354338	0.50618	0.887856
453	3.68352	4.96972	3.7131	5.00519	3.93759	4.80184	3.79135	4.60599	3.80707	3.82421	3.66133	4.37702	3.31311	3.954	2.94986	4.19625	3.48779	4.19488	4.52078	5.04985	3.37959	3.67731	4.49107	5.31414	3.73021	4.18475	4.19334	4.61549	3.75735	4.38694	3.34567	4.26595	4.74415	3.68393	3.92522	3.59826	3.32248	3.8955	4.85961	3.2957	4.11353	3.74059	4.49765	3.63706	4.04191	2.59329	3.01681	3.9541	4.90949
454	2.19279	0.17289	2.18379	1.60411	2.33243	1.69325	2.18303	1.6097	2.25729	1.5682	2.19554	0.799625	2.25096	1.74691	1.9863	1.46955	1.82482	1.75798	2.68172	2.24008	2.09676	1.04703	2.70139	1.36937	2.26011	1.84658	2.20685	1.57226	1.8711	1.73028	2.08216	1.97259	1.49468	2.41131	1.96752	2.16278	2.16392	2.79451	2.84203	2.00144	0.995548	1.77006	0.779221	2.14864	2.11614	2.05505	1.79917	1.94212	1.80744
455	-1.67563	0.589429	-1.34707	0.730994	-2.35819	-0.271115	-3.28082	-2.25369	-1.67463	-2.38569	-1.58333	-0.542488	-2.80811	-0.8691	-2.29725	-1.40506	-1.62977	-1.07243	-1.63934	-0.565259	-2.67764	-0.962206	-1.36238	-0.279122	-1.47698	-1.38358	-2.91819	0.0216751	-2.57251	-0.776083	-2.57118	-0.874663	-0.905	-0.580574	-0.697816	-2.2252	-2.04035	-1.57643	-0.397069	-3.40799	-2.22256	-0.0812426	0.236939	-2.20108	-1.57723	-1.77786	-1.04281	-0.784925	-0.329047
456	-2.59943	-1.34454	-2.48867	-0.47012	-2.87227	-2.07199	-2.40483	-1.66738	-1.98133	-2.25965	-1.37033	0.587695	-2.54305	0.699944	-1.91295	-0.61614	-2.0282	-2.20717	-2.45191	-0.481391	-1.84244	-0.170123	-1.69859	-0.168171	-2.12082	-0.0344152	-0.691492	-0.0381689	-1.43667	-1.77883	-2.50012	-1.75322	-1.00023	-0.100838	-0.807086	-3.48833	-1.92194	-1.85396	-0.627841	-1.93798	-1.44977	-2.19141	0.0435858	-3.45187	-0.0683107	-2.21702	-3.1936	-0.894584	-1.09135
457	3.79397	0.0714588	3.79161	2.74622	3.80547	2.93783	3.63129	3.13585	3.87899	2.96429	3.46669	1.0082	3.48972	2.2047	3.46595	2.71165	3.36825	3.15485	4.2797	4.02623	3.5505	1.80153	4.54913	3.37001	3.74074	2.67029	3.84411	3.01058	3.49056	3.72987	3.63875	4.14725	3.43717	2.57052	3.20316	3.68249	3.67846	4.26322	2.25597	3.45437	2.92456	3.65497	2.1152	2.94789	3.30418	2.87235	2.97576	3.46203	2.35874
458	0.222529	-1.51623	-0.282081	-1.23882	0.407519	-0.730061	-0.509638	-1.43687	-0.0478973	-1.75059	-0.821012	-1.67219	-0.344659	-2.03028	-0.096046	-1.03133	-0.18224	-0.281993	-0.177687	-0.699755	-0.0212393	-2.35218	-0.687019	-1.13837	0.0630121	-1.0205	-0.788564	-0.561491	0.00800419	-0.646369	-0.276474	-0.233174	-0.223105	-1.13346	-0.63649	-0.632257	0.202661	-0.353586	-1.36012	-0.16185	-1.38843	-0.363335	-0.955995	-0.034235	-0.718271	-0.108494	-0.799874	-0.132068	0.0997305
459	3.42861	3.54223	2.98074	4.14377	3.41109	4.52665	2.57524	3.15567	3.54917	2.79534	3.04334	4.15497	2.68308	3.68033	2.71095	3.6254	2.96664	3.23526	3.38402	3.83351	3.00773	2.54224	3.20898	4.25373	3.44303	4.34571	3.1946	4.66258	3.26224	3.84719	2.77109	3.80234	3.63004	3.52247	3.01013	2.48122	2.98418	2.75345	4.07234	2.87894	3.22465	3.29639	4.60747	3.08984	3.58573	2.76517	2.97241	3.18629	4.22358
460	4.43671	1.62917	5.02985	3.75067	4.17483	3.60405	5.58102	5.60382	5.22126	5.14618	5.71947	1.06464	4.29871	3.25633	3.70196	4.13854	3.86784	3.16132	6.75545	5.31544	3.89771	3.45735	6.33663	4.16689	4.31695	2.23611	5.51595	2.43419	4.08037	4.34102	5.31798	5.5401	3.1805	3.61374	4.53218	5.91086	4.13054	5.81541	2.64522	4.61698	4.50672	3.64373	2.78623	3.24603	3.93885	3.6189	3.41801	4.03017	0.989476
461	-1.35317	0.181228	-1.53163	-0.350126	-1.46756	-0.474342	-1.7687	-1.59666	-0.915495	-1.43009	-1.5263	-0.182562	-1.77627	-0.913965	-1.67798	-0.441838	-1.40983	-1.28502	-1.21515	-0.436568	-1.65854	-1.28971	-1.37555	-0.652937	-1.24766	-0.379742	-1.58731	0.054553	-1.31102	-0.726301	-1.26742	-1.11579	-1.29013	-0.641326	-1.76403	-1.79099	-1.79218	-1.60354	-0.370378	-1.83078	-1.16665	-1.0231	-0.782053	-0.841908	-0.900366	-2.12106	-1.48068	-1.0253	-0.283893
462	0.0815358	1.18394	-0.337822	1.74439	-0.0670323	0.768137	-2.38388	-0.953454	-0.36788	-1.11471	-0.471614	0.155573	-3.13753	-0.195963	-0.568683	-0.15061	-0.21986	0.0303192	-0.304108	0.909002	-0.821943	-0.630062	-0.292083	1.87198	-0.911106	-0.430451	-0.290016	2.6302	0.101932	0.537258	-0.360787	0.656818	-0.961074	0.0204678	-0.526586	-1.52818	-1.21287	-0.989184	0.795514	-1.16867	-1.02958	-0.589764	1.65391	-0.137357	0.299985	-0.772437	-0.753016	-0.0160527	1.28658
463	0.924732	-1.30813	0.780493	0.584163	1.30819	-0.522874	0.462587	0.0919018	-0.585906	-0.584498	-0.316376	-2.49902	0.741745	-1.15119	0.853659	-1.04051	1.08434	0.382276	0.908104	0.218781	1.14022	-0.613872	0.174074	-0.568129	1.26846	-2.41515	1.29203	0.243651	0.920812	-0.255893	0.478613	0.822629	-0.631751	-0.818459	-0.655537	-0.29731	0.722302	-0.0578852	-1.33777	0.0965147	-0.813295	-0.0428467	-0.321493	-0.230563	-0.403342	-0.178234	0.188353	0.159961	-0.673138
464	0.348095	-1.21705	0.000982761	-0.57979	0.176785	-0.149874	-0.165114	-0.668595	0.100331	-0.780956	-0.302685	-1.10332	-0.405233	-0.916746	-0.292097	-0.649052	-0.295409	-0.727335	0.873079	0.241331	-0.154129	-1.38069	1.13113	-0.236997	-0.0449972	-0.929077	-0.0601249	-0.685535	-0.29241	-0.473778	0.00480127	0.277303	-0.899015	-0.67387	-0.287735	0.283682	-0.381816	0.529655	-0.716348	-0.202411	-0.560043	-0.216919	-1.02338	-0.305634	-0.405199	-0.0277872	-0.439602	-0.247832	-1.30049
465	-0.793742	0.218609	-3.18582	-0.215632	-2.96472	-0.0545778	-1.70722	-0.82091	-0.974751	-2.73142	-1.38044	-0.140509	-1.06792	0.0110226	-0.699259	-0.229601	-2.35846	-1.02821	-0.43633	-0.25615	-3.08337	-0.370961	-0.192642	0.933829	-1.11335	-0.411846	-0.945287	0.186353	-0.447563	-0.551391	-1.06313	-0.784673	-0.186464	-1.03978	-0.957021	-1.22139	-1.404	-0.946504	0.648284	-1.49442	-0.65438	-0.516392	0.56191	-2.29395	-0.587597	-2.43036	-1.02706	-0.292557	0.439861
466	1.18971	0.998362	1.20596	2.01951	1.34452	2.76707	0.948071	0.675431	1.7267	0.577341	1.22354	2.45791	0.660279	3.52808	0.686493	3.98461	1.3086	1.35644	1.96097	2.37982	0.994685	2.05447	1.42546	1.88159	1.5457	4.50762	1.38175	4.06673	1.44195	1.54352	0.558102	1.31376	3.42687	2.10362	1.10903	1.04144	1.16644	1.22671	3.15563	1.20269	1.96186	1.37613	3.3908	1.30593	2.07859	0.401313	0.642148	1.35085	4.24114
467	-0.919209	-3.07493	0.324318	-2.93067	-0.0589786	-2.33678	-0.2765	0.960517	0.352684	-0.335784	1.14522	-4.1569	-1.07027	-2.94635	-0.614153	-2.21661	-0.645096	-0.84799	0.513477	-1.67608	-1.2868	-1.46681	-1.59885	-0.943661	-0.4827	-2.86824	0.148647	-2.74583	-0.209409	-0.0482912	-0.708729	0.262698	-2.90151	-0.968309	-2.17252	-0.346349	-0.99986	-0.826902	-2.36609	-0.57617	-1.42728	-1.75477	-4.00943	-1.32228	-2.11957	-2.94428	-1.49489	-0.398646	-1.46992
468	-0.089747	-0.896522	-0.567574	-3.04602	0.413225	-1.0576	-2.43091	-2.52603	0.404549	-2.95345	3.1925	-2.78567	-0.614419	3.09471	2.37421	-0.989378	1.01161	-0.938246	0.937287	-2.4802	-0.332779	-2.94644	-0.401126	-0.495587	0.110413	-0.379779	-0.505712	-0.721724	3.71801	-2.39248	0.522841	-2.39284	-0.769927	-0.158913	-2.45446	0.155666	-0.399787	-0.0882931	-2.17989	0.449441	-2.83339	0.0644608	-0.41826	0.650657	-0.0170479	1.44592	-2.51578	1.34092	0.775434
469	0.0608563	0.490717	-0.178247	0.827558	-0.389713	2.03337	-0.717664	0.394863	0.102221	0.271309	0.335372	1.50693	-0.928448	0.946725	-0.189003	0.507486	0.124862	-0.383061	1.31312	1.57331	0.29195	-0.52222	0.352573	1.93233	-0.0371885	2.01342	-0.151424	1.05403	0.19743	0.483271	-0.24603	0.338251	1.59315	2.63747	0.631457	-0.335485	-0.216101	0.101047	2.21974	-0.222621	1.00066	0.556252	2.16534	-0.448422	0.664006	-1.25346	0.134449	-0.405978	1.14743
470	-0.579214	-2.43828	-0.650177	-0.620888	-0.535449	-0.91326	-0.18409	-0.255729	-0.874242	-0.135794	-0.935095	-2.57114	-0.48783	-2.56623	-0.673161	-2.48375	-0.428988	-1.0003	-0.303989	0.118623	-0.386487	-2.26358	1.0678	-0.187038	-1.08567	-1.76189	-0.296289	-2.54664	-0.354367	-1.28448	-0.260418	-0.679468	-2.13899	-0.995864	-0.401735	0.148833	-0.701407	-0.135107	-1.92933	-2.3867	-1.40003	-0.239248	-2.94335	-1.0012	-0.963868	-0.498524	-0.431631	-0.694482	-1.22705
471	2.33088	0.6134	2.09838	1.22257	1.73122	0.898932	1.50261	1.15881	1.10461	0.393302	1.48857	-0.294333	1.64196	0.703123	1.29605	0.765537	1.66303	0.994301	1.59555	1.14689	2.08395	0.571967	1.46432	1.11764	2.27189	0.849718	2.2172	0.988602	1.32325	1.70045	1.24906	1.98412	1.00602	1.13202	0.880829	1.35077	1.80577	1.89539	1.35977	0.825086	0.782417	1.61108	0.272929	0.963788	0.453197	1.03842	1.44796	1.55667	0.83674
472	-1.18421	-1.17603	-1.58594	-0.483206	-1.86353	-0.161908	-0.963855	-1.20873	-1.35697	-0.545358	-2.04823	0.452848	-0.694519	1.26678	-1.40352	0.470182	-1.29852	-1.24343	-0.538118	0.548605	-1.22309	0.418172	-1.73483	-2.02094	-1.25374	0.410974	-2.62398	-0.3258	-1.15995	-0.804406	-1.6107	-1.3985	-0.164293	-1.62748	0.116838	-1.82524	-1.61907	-1.74019	0.0346842	-1.54418	-0.967685	-0.630779	-0.586263	-2.5218	-0.801082	-1.3526	-2.36133	-3.33335	-1.02776
473	2.61862	3.44626	2.2543	3.97486	2.63897	3.68107	2.30557	2.86547	3.07837	3.53609	3.27242	3.82221	2.42808	3.38296	2.5075	3.3889	2.01836	3.11014	2.64345	3.40018	2.43607	3.16488	2.43553	4.07021	2.21272	3.66215	2.64057	3.54134	2.85587	2.94475	2.54746	3.2443	2.80785	3.70268	2.81495	1.92688	2.54376	2.13207	3.95539	2.11914	2.55721	2.98794	3.45167	3.5531	2.86271	1.95922	2.16544	2.91142	3.30708
474	-0.591057	-2.27922	-0.408189	-0.734731	-0.404171	-2.69092	-0.292369	-0.209912	-0.601048	-1.21309	0.0157642	-2.65371	-0.797198	-2.92179	-2.23139	-2.11917	-0.68769	-2.92893	-0.00254107	-0.182786	-0.646442	-1.74704	0.210798	-0.316902	-0.276379	-2.19393	-0.316672	-1.9384	-0.8177	-2.66174	-0.511299	-0.240271	-0.936577	-2.28611	-0.307755	-0.39478	-0.302892	0.0975895	-1.88622	-0.309536	-0.815235	-0.684334	-1.94532	-2.67215	-2.12172	-0.908821	-1.44466	-0.618714	-3.68261
475	-1.1502	-2.56674	-1.53037	-1.92512	-0.90278	-2.6554	-3.22343	2.2085	-3.39528	-4.29195	0.411388	-2.41941	-2.31634	-2.53898	0.493124	-2.39015	0.243511	-3.09382	0.0389781	-2.38301	-0.728014	-3.71863	-0.674462	2.31606	-0.999749	-2.6294	-1.31076	-2.97573	1.55918	-2.67967	-0.387317	-2.34119	-3.15969	1.56273	-2.35263	-2.90768	0.147233	-0.0481396	-2.13495	0.114855	-2.51732	-0.886781	-3.42033	1.33991	-3.34903	-0.703244	-1.65123	1.16189	-2.62198
476	0.816355	2.4506	0.309723	1.535	0.589623	1.55674	0.319111	0.694571	0.456249	0.363657	0.178266	2.11069	0.2157	1.45613	0.0631433	0.880253	0.770051	0.791245	0.386269	1.4199	0.52018	1.32127	0.258992	1.87533	0.92739	0.670104	1.10553	1.53981	0.956254	1.3008	0.637575	1.06281	0.716213	1.27743	0.91997	0.361457	0.802186	0.62984	2.34812	0.250457	0.640944	0.741005	1.72022	0.340808	1.31533	-0.0433311	0.827883	0.685137	0.80801
477	1.1913	-1.43088	1.85026	0.458957	1.26921	-0.365932	0.557981	0.253542	0.374508	-0.466073	-0.276255	-2.22367	0.959802	-0.809472	1.25624	0.156057	1.15435	0.648688	0.816728	-0.0149713	0.834985	-0.650795	0.987092	1.29655	1.68309	1.15977	1.2401	0.649526	0.811159	-0.549432	0.678439	0.118103	-0.233575	-0.211482	-0.229491	-0.0837154	1.27573	0.791568	-0.319485	1.03348	-0.0824203	1.10843	0.0932245	0.521276	0.888741	0.388472	0.828362	1.25755	-0.806547
478	-1.88072	-1.14909	-2.77639	-1.05618	-2.29049	-0.480983	-2.93172	-2.32027	-1.49358	-1.55993	-2.82934	-0.299535	-2.38449	-1.13027	-1.6652	-1.3455	-2.25324	-2.92431	-2.24397	-1.3167	-1.89021	-2.07305	-2.49703	-1.85166	-2.15888	-0.236795	-2.85627	-0.744308	-1.94499	-1.73362	-2.5537	-1.53192	-2.06729	-1.28815	-2.58451	-2.22737	-2.52413	-2.99715	-1.99514	-2.67613	-1.11637	-1.38155	-0.976261	-1.73017	-2.14379	-2.12858	-1.9262	-1.95508	-0.619064
479	-0.0928931	2.9517	-0.105176	1.47172	0.170543	1.75755	-0.0372429	0.822934	-0.33195	0.746152	-0.537777	0.983418	0.0500364	-0.0729065	0.169178	-0.181289	0.0226526	0.322864	-0.1097	0.902877	-2.79933	0.022532	-0.26366	1.3445	0.317946	-0.247416	0.25526	1.4361	0.219016	1.57587	-0.330939	0.116941	0.0566645	0.733566	0.422571	-0.382284	-0.084034	-0.518942	1.33669	-0.161237	-0.202502	-0.152286	0.876187	-0.623195	-0.431631	0.245918	0.58141	0.152088	0.878501
480	-0.808321	0.245744	-1.00266	0.430408	-0.901635	0.216423	0.113867	0.442322	-1.4879	-0.757965	-0.894507	0.121239	-2.88167	-0.674954	-0.907894	0.0314317	-0.842167	-0.740986	-2.68016	-0.269559	-1.2784	-1.2677	0.131933	0.0568967	-0.333809	-0.15589	-0.77614	-0.00696754	-0.48952	0.259347	-1.08262	-0.62679	-0.328711	-1.22104	-0.330136	-0.163774	-0.697837	-0.706515	0.206625	-1.33983	-0.479442	-0.588928	0.0265007	-0.918804	-0.318188	-2.64057	-0.958892	-0.415123	0.229632
481	0.27504	0.646018	0.223547	1.23899	0.196266	1.0715	-0.224612	0.53748	0.144053	0.265971	-0.0513382	1.40353	-0.472784	0.459139	-0.421874	0.377598	0.169423	0.283352	0.210727	1.24589	-0.244112	-0.292419	-0.00255203	1.04004	-0.396586	0.142112	0.0275664	1.07693	0.424561	0.595808	-0.796941	-0.266301	0.604943	0.67028	0.565775	-0.750332	0.2743	-0.0222797	1.36187	-0.383354	0.104309	0.834536	0.873639	0.119102	0.486935	-0.518868	-0.389831	0.472916	1.60946
482	1.73588	-0.253501	1.36423	1.47736	1.84785	1.46182	1.95548	1.54603	1.68737	1.70217	1.09827	-2.15806	1.93018	-1.75607	2.43827	0.377847	1.63016	1.30366	1.66199	2.14343	1.19544	-2.79976	1.98453	1.45856	2.07254	-0.733026	1.81902	0.430105	2.06301	0.871184	1.80852	2.00045	0.805311	1.15395	1.66949	1.04871	1.75676	1.65314	1.10174	1.98409	0.577459	1.40898	1.00144	1.82924	1.03623	1.34033	0.94665	1.60386	0.86314
483	1.25762	-2.46477	1.42815	0.828324	1.48819	0.196189	1.04606	0.972593	0.665628	0.947837	0.486452	-1.21136	1.3731	-0.318886	0.880245	0.415661	0.926821	1.0053	0.96371	0.871417	1.00405	0.00678301	1.24478	0.760969	0.957926	-1.09162	1.28534	-0.586914	1.19418	0.831117	0.736985	1.00395	0.422053	1.1349	0.907098	1.03548	1.39381	1.36225	0.744734	0.91934	0.515301	1.11955	-0.485367	0.54043	0.297947	0.44544	0.731558	0.950655	-2.46953
484	4.76255	-0.106317	4.80999	3.70994	4.59249	3.47221	4.30496	4.43284	4.34355	3.78375	4.57775	1.8049	4.31222	3.20617	4.13	3.64694	4.77402	3.77344	5.33752	5.11124	3.87482	3.10527	5.03002	4.44359	4.47695	2.88581	5.13929	2.99468	4.77227	4.46502	4.59861	5.26665	4.08985	3.32711	4.03199	4.47691	4.63232	4.98011	2.66786	3.93016	3.83902	4.2409	2.14456	3.37523	3.57626	3.11564	3.45558	3.60633	2.13925
485	-2.57707	0.528384	-3.44028	-0.184281	-2.87048	-0.513139	-2.75899	-0.567159	-1.97327	-0.858953	-2.52399	0.0861492	-2.64094	-2.91703	-2.113	-2.63426	-3.16619	-3.22516	-3.30296	-0.901557	-2.11974	-2.62495	-0.383533	-0.567671	-2.06293	-2.82956	-1.71018	-0.853597	-2.39993	-0.542884	-2.56825	-0.74852	-1.23815	-2.32106	-1.08047	-2.0782	-3.0525	-2.44308	-0.288202	-2.36702	-3.33292	-2.94567	-0.522263	-2.88751	-0.81371	-2.21734	-2.74042	-2.08321	-0.314421
486	-0.0887971	0.901312	-0.236948	0.9814	-0.297961	0.745323	-0.638853	0.637511	-0.396817	-0.0791235	0.147058	0.754024	-0.182646	0.307936	-0.191142	0.202011	0.0656023	0.0777617	-0.205601	0.666039	-0.116508	0.267645	-0.190309	1.08104	0.0157757	0.20084	0.0316281	0.462055	0.221221	1.02501	-0.308118	0.0687218	0.226254	1.46441	0.239985	-0.780377	-0.517498	-0.323788	1.5257	-0.358397	0.179239	-0.0209608	0.678313	0.00276184	0.167274	-0.679173	-0.249482	0.102271	0.700122
487	1.96395	3.47064	1.83747	3.02678	1.96924	3.15077	1.68326	2.35269	1.84565	1.82907	1.84961	3.17662	1.6164	2.22523	1.40253	2.06653	1.84017	2.07459	2.23942	2.67716	1.79353	1.86506	2.27116	3.03045	2.03974	2.23121	2.11527	2.781	1.82632	2.32955	1.30942	2.09471	2.93069	2.47612	2.14492	1.74553	1.7512	1.91897	2.98356	1.65999	2.46217	2.26354	2.97184	1.86295	2.2549	1.24767	1.59198	2.07029	3.01789
488	0.357656	2.02226	0.221847	1.36144	0.367685	1.67904	0.109632	1.10978	0.457233	0.168578	-0.488867	0.706383	-0.0807714	0.993855	-0.0243163	0.841028	0.0901604	0.303776	0.806283	1.12783	0.553768	-0.90605	0.992553	1.76601	0.59601	1.20622	-2.71261	1.71404	0.780421	2.08695	0.238232	0.996392	1.34683	0.808285	0.774332	0.146842	0.0996733	0.120111	0.76847	-0.374977	0.58238	1.11177	1.75656	-0.73015	0.799697	-3.3234	0.381847	1.18718	1.54612
489	5.77574	6.01031	5.79129	6.85033	5.58323	6.84017	5.73145	6.54639	6.0315	5.89028	5.9606	6.83049	5.39727	6.13006	4.93261	6.24373	5.56269	5.80954	6.47398	6.8003	5.44239	6.01068	6.30601	6.8911	5.68459	6.31702	6.10187	6.66835	6.06827	6.6168	5.42359	6.23329	6.66836	5.37781	6.31459	5.64916	5.65621	6.08696	6.58052	5.53684	6.06844	6.06745	6.52352	5.79755	6.24208	4.94277	5.41541	5.80493	6.77334
490	0.316005	1.14764	0.174935	1.1281	0.403915	1.21327	-0.00280285	1.18908	-0.0369473	0.56418	0.660372	1.00432	-0.144534	0.920352	-2.79429	0.501917	0.51555	0.584317	0.773149	0.999784	0.30687	0.733945	0.682345	1.15115	0.372837	1.02593	0.504192	1.29446	0.40379	1.01927	0.112832	0.968703	1.24647	1.17981	0.224428	-0.051548	-1.86472	0.486418	2.05405	0.128569	0.977384	0.993271	1.31917	0.0619917	0.653347	-0.578931	0.0912571	0.316389	1.11219
491	-0.0508704	-1.54646	-0.183625	-0.707802	-0.152806	-0.996903	-0.269887	-0.0290871	-0.452921	-0.490624	-0.672888	-1.28037	-0.202768	-1.19296	-1.3021	-1.07843	-0.415021	-0.706726	0.206492	-0.189238	-0.297478	-0.720954	0.811102	-1.19854	-0.736028	-2.31657	0.28778	-2.26656	-0.342787	-0.281584	0.123527	-0.346075	-1.99278	-0.98179	-0.272025	-0.121361	-0.494602	-0.0939837	-2.31452	-0.505837	-2.40522	-0.469456	-1.403	-0.471517	-0.527614	-0.387099	-0.127363	-0.944758	-0.906631
492	-2.63381	0.143904	-2.85309	0.160458	-0.605401	0.112384	-2.87828	-0.459057	-2.23407	-0.276811	-1.11648	0.236959	-2.59314	-1.05502	-2.60887	-1.40486	-3.00383	-0.528939	-2.77993	-0.343759	-3.06856	-2.50043	-2.08039	-0.536361	-2.84397	-2.32875	-1.01755	-0.327438	-0.924236	-1.07161	-2.67296	-2.01492	-1.18111	-0.823321	-0.596117	-2.79147	-1.82941	-1.95672	-0.409922	-1.48904	-2.26495	-0.784818	-0.48676	-0.877784	-1.04011	-1.60326	-3.34801	-0.752976	-0.254982
493	0.194764	-3.51213	0.386312	-0.37955	0.280534	-1.21608	0.531867	0.0215063	0.772644	-0.719779	0.318883	-0.718431	0.0922804	-2.67566	0.256874	-0.685499	0.16515	-0.0601006	2.1559	0.205965	0.0789356	-0.592983	1.653	0.161161	-0.0214539	-1.45077	0.773802	-0.373538	0.405998	0.36535	0.733269	1.15394	-0.194144	-0.258585	-0.515929	1.13939	0.412704	1.34205	0.148932	0.342184	0.0711575	0.00346661	0.371707	0.0141153	0.199256	-0.49006	0.114813	0.0335298	-0.822168
494	3.74888	4.83011	3.56645	4.58288	3.53449	4.75035	3.43937	3.60329	3.70365	3.49398	3.44591	4.09103	3.43758	4.32924	3.46711	4.52338	3.6909	3.61048	4.12636	4.42346	3.55959	3.57571	3.78826	4.3767	3.62203	4.9749	3.88644	5.12505	3.77689	4.02997	3.33366	4.07959	4.67278	4.3058	3.51876	3.27844	3.67634	3.67827	5.40463	3.39891	4.02561	3.8119	4.86409	3.47619	3.78419	3.25692	3.52073	3.65376	4.93403
495	-1.71313	-2.16614	-2.02179	-1.70718	-1.93764	-3.08743	-3.25598	-1.62439	-1.7156	-1.9228	-3.03026	-2.56997	-2.28319	-2.02633	-2.75488	0.347025	-2.05303	-0.0811863	-3.12967	-2.033	-2.14265	-3.38831	-3.3264	0.308059	-1.06628	0.287758	-2.89035	2.16032	-0.907253	-1.95681	-1.90754	0.554437	0.866862	-2.75172	-3.44202	-2.80183	-1.7215	-1.42285	1.03133	-2.21428	-0.944561	-2.96246	0.483833	-1.49389	-2.60357	-2.96075	-1.44945	-2.00212	0.684706
496	0.720638	1.02155	0.799457	1.8665	1.06024	1.9979	0.568029	0.892884	0.816068	0.667772	0.539814	1.58889	0.362742	1.37913	0.185647	1.83796	1.13446	1.18862	0.634563	1.22439	0.790399	0.82619	0.887074	2.10328	0.781515	1.54398	0.728978	1.69331	1.33032	1.44557	0.738627	1.14639	1.34767	1.5178	0.937528	0.452728	1.10969	0.682199	3.48845	0.884356	1.27416	1.3123	2.063	1.10405	1.72021	0.0717487	0.663121	1.05087	1.81984
497	2.6266	-3.12169	2.86561	1.42869	3.04846	1.99051	2.17405	1.60808	2.65842	1.0822	2.05246	0.422352	2.25048	1.35616	2.42372	1.1307	2.49057	2.29162	3.01969	2.96253	2.67223	1.12054	2.98573	2.13505	2.98592	1.1706	2.38599	1.71227	2.70459	2.5282	2.68073	3.18316	2.20522	1.71865	1.2728	2.02681	2.27455	2.46836	1.32384	2.34802	1.6819	2.53279	1.17051	1.81802	1.57943	1.69682	1.7295	2.45234	1.24636
498	-3.27355	-2.32736	-2.84471	-1.79579	-2.71928	-1.94366	-2.73122	-2.46786	-1.50615	-1.62182	-1.69681	-1.3562	-2.78063	-1.00335	-2.29864	-0.689988	-2.58279	-2.03201	-1.45582	-1.02787	-2.38068	-2.74114	-1.41194	-1.84122	-1.59216	-0.965506	-2.78723	-0.479618	-2.60567	-2.07748	-3.25511	-2.39371	-0.162781	-2.46687	-0.980697	-2.20282	-3.47853	-2.67706	-1.54267	-2.98409	-2.87449	-3.03694	-1.20889	-3.13526	-1.16687	-2.83934	-1.93658	-3.13999	-0.451851
499	1.66769	3.00813	2.07179	2.59933	1.42799	2.90953	1.85211	2.16778	2.74501	2.38715	2.28314	3.23488	1.70936	2.599	1.72144	2.57949	1.42607	1.44973	2.3761	3.44381	1.95269	1.64118	2.47145	3.5698	1.71119	3.42025	1.90927	3.90933	2.25364	2.06785	1.5691	2.37305	3.9532	2.14602	2.5747	1.50257	2.22872	2.17081	3.44681	1.927	2.14762	2.04582	3.30363	1.83803	2.57492	1.66093	1.69495	2.71724	3.79565
500	-0.247749	0.241989	-0.456706	1.17452	-0.18322	0.657668	-0.464544	0.940656	-0.197347	2.09808e-05	-0.156941	0.840765	-0.498156	0.277898	-0.384426	0.0136666	-0.386644	-0.412006	-0.141791	0.621603	-0.401221	-0.325454	-0.102855	1.05885	-0.256498	-0.207265	-0.050467	0.123393	0.179914	0.776665	-0.494942	0.41675	0.114156	-0.184261	0.265593	-0.487713	0.0267878	-0.355034	0.973598	-0.360273	0.133822	0.39955	1.00214	0.00964069	0.105791	-0.862546	-0.51296	0.130705	0.756338
501	4.16186	-3.19451	5.37793	6.09082	4.28733	4.52971	5.59957	5.27195	3.50259	4.36185	3.90109	-0.475898	4.28744	0.52224	3.27125	-0.176183	3.99854	2.37052	5.29797	4.56343	3.41961	0.386017	6.0119	4.65721	1.61494	-0.631557	6.2361	1.81688	3.41382	4.1113	4.6717	4.79401	2.16612	2.78764	3.97738	5.0733	3.8656	5.35898	-0.116968	3.36508	2.87517	5.07526	2.44845	2.83051	4.79502	3.09509	2.44384	3.23471	-0.666852
502	2.16468	1.58877	1.66944	2.96447	1.8563	2.88691	1.46146	1.63985	2.20476	1.48628	1.8425	2.83463	1.51809	2.69203	1.81032	2.72444	1.76436	1.95214	2.34298	2.86593	1.93517	1.75981	2.1801	2.96061	1.80745	3.49582	1.83337	3.99503	2.11815	2.46962	1.45524	2.51519	3.49449	2.51636	1.79388	1.39411	1.83743	1.77253	2.92085	1.62842	2.08203	2.23	3.42279	1.81091	2.26463	1.51449	1.67445	2.09108	3.9012
503	-0.0158677	0.768423	0.160203	0.994815	0.62083	0.79543	-0.0900936	0.351264	0.350173	0.584307	0.740262	-0.352564	-2.28888	1.70761	-0.295281	2.34937	-0.411984	-0.232381	0.329486	0.253466	-2.89347	-0.0549684	0.362618	0.754864	-0.209194	2.12443	0.931674	2.70404	0.422253	0.758809	0.150813	0.791631	2.80479	-2.66295	-0.603573	0.348978	-2.62813	0.323914	1.86115	-1.09778	0.623851	0.258722	1.91259	-0.0933352	0.298511	-1.24032	-0.695235	0.0897002	2.06157
504	0.661719	1.51563	0.514244	1.28906	0.350336	2.14431	0.126817	0.594513	0.814301	0.0635166	0.611743	2.51203	0.167298	1.98734	-0.0183234	1.5207	0.472792	0.38351	1.31791	1.71878	0.757202	0.730039	0.933043	1.42361	0.647952	2.08276	0.711225	1.8288	0.639426	0.840671	0.0554509	0.7103	1.52804	1.14691	0.757867	0.517118	0.484672	0.556904	1.61035	0.339647	0.900431	1.07497	1.74706	0.426486	1.2456	-0.477096	0.13763	0.569664	2.18711
505	-0.467281	0.274898	-3.14772	0.000574112	-3.12235	-0.439116	-2.85591	-0.592417	-1.41581	-0.545256	-2.50637	0.395972	-3.6124	-2.27939	-3.3005	-1.22662	-3.7309	-0.780412	-2.4179	-0.575211	-2.99665	-3.58262	-1.47166	-0.817461	-3.04378	-2.80403	-0.76561	-1.05354	-1.18105	-0.763105	-1.4694	-0.421349	-1.39103	-1.3433	-0.392058	-2.55648	-3.19864	-1.25978	-0.024725	-1.57161	-2.94378	-1.77246	-0.474124	-0.706447	-1.42408	-3.28009	-2.5189	-1.15186	-0.32478
506	-1.45552	2.49349	-2.46838	0.593511	-1.08411	0.223859	-1.30962	-0.10122	-2.79317	-1.04661	-2.92116	1.04256	-1.71425	-2.28109	-2.85172	-3.12958	-1.63145	-1.17278	-1.86454	-0.61016	-1.29984	-2.99988	-2.45776	-0.196812	-1.00859	-2.4819	-0.835404	-0.527797	-0.79423	-1.25509	-2.74313	-2.77899	0.65459	-0.86484	0.0116062	-1.56258	-1.12818	-3.09833	-0.00784111	-1.32753	-0.61529	-1.00304	-0.285202	-2.49321	-0.319012	-2.51318	-2.33887	-0.683846	0.477245
507	-2.08176	0.324128	-0.844746	-1.05556	-1.35698	-0.22275	-3.32013	-3.29802	-1.14574	-1.23163	-2.70978	-0.532448	-3.03174	-0.813289	-1.6559	-0.912555	-2.55413	-1.81736	-2.82268	-0.809603	-1.97795	-1.84608	-1.35793	-0.385713	-3.1854	-1.26674	-1.87525	-0.634583	-2.25626	-1.36556	-2.47262	-1.92513	-1.11095	-0.814863	-1.57569	-3.00077	-2.76489	-2.32484	0.473753	-2.66567	-2.56635	-1.37663	-0.691743	-1.20273	-1.3833	-2.51321	-2.73699	-1.75222	-0.640117
508	0.985076	-0.437699	0.885505	0.224504	1.11559	-0.00256062	0.442338	-0.0749664	0.111066	-0.487307	0.197435	-2.39422	1.10324	0.609306	0.301026	0.769851	1.1742	0.635401	0.495225	0.474082	1.05962	-0.442717	0.772554	0.191731	0.79717	-0.366393	1.33374	0.392725	1.14857	0.618113	1.45848	1.01698	-0.61119	0.369092	0.152937	0.68378	1.26955	0.689869	-0.153584	0.332803	0.245322	0.864369	0.0579405	0.513179	0.462654	0.30622	0.612204	0.617507	-0.434389
509	-0.772417	0.702875	-0.409767	0.384936	-0.116965	0.197016	-0.441336	0.364073	-0.598975	-0.63494	0.393458	0.579755	-0.835961	0.731301	-2.11357	1.2774	-0.631889	0.559886	0.0547051	0.418801	-0.535658	0.86088	-0.254093	1.21	-0.242642	0.599636	-0.245059	1.11746	0.0246248	0.0361404	-0.77535	0.149926	0.644881	1.01502	-0.27672	-0.638021	-0.75041	-0.570163	1.8987	-0.386964	0.13413	-0.704693	0.904342	0.551499	0.201003	-2.0877	-1.27237	-0.286953	0.448843
510	2.07674	0.44933	3.04445	1.62786	1.24855	0.801658	2.35192	2.78155	2.26987	1.67752	2.88949	-0.285759	2.03563	0.0924387	0.43922	0.990995	1.35511	0.92265	2.93866	2.19115	0.686234	0.751991	3.09013	1.98416	1.37106	-1.10969	3.58067	0.068368	1.42753	1.5584	1.93605	2.29186	-0.115365	1.33327	1.86875	2.83872	1.79212	2.5665	1.59424	1.76683	1.1275	1.02969	-0.160439	0.941277	0.810633	0.947408	1.4615	0.779563	-1.12741
511	2.36646	3.58533	2.50221	3.55887	2.27801	3.14685	2.01531	3.52218	2.50079	2.1978	2.18379	3.55692	2.15864	2.57056	2.18387	2.41894	2.09784	2.29503	2.58209	3.02465	2.42275	1.83351	2.45249	3.14661	2.55708	2.80906	2.61697	3.05156	2.62513	3.40369	2.18477	2.74841	2.86502	2.00456	2.59194	1.88274	2.13851	2.16206	3.13916	2.30921	2.5519	2.68228	3.27802	2.16636	2.70592	1.65654	2.17246	2.60203	3.25748
512	-3.18539	-0.179914	-2.75218	-0.618196	-3.10216	-1.74047	-2.30628	-0.778368	-1.6234	-1.67834	-2.89659	-1.30558	-2.26471	-2.24312	-2.60025	-2.47093	-2.34628	-3.32836	-3.00468	-1.55737	-2.64455	-3.44113	-2.63038	-1.06525	-2.82823	-2.73197	-1.81612	-1.57343	-1.71145	-0.809948	-2.91023	-2.11642	-1.70012	-2.90765	-2.03125	-2.64528	-1.82266	-4.2943	-1.56772	-3.03857	-2.73999	-2.79338	-1.21737	-2.43353	-2.06213	-2.65901	-2.39569	-1.40186	-0.733181
513	4.60037	5.37195	4.33661	5.45591	4.52925	5.41848	4.05467	4.6688	4.49388	3.7368	4.21731	5.08926	3.95353	5.02248	3.94067	5.1012	4.36122	4.43047	4.97911	5.38344	4.38888	4.36859	4.64944	5.8483	4.45006	5.47171	4.58584	6.00677	4.55657	4.92914	3.84374	4.83543	5.29224	4.99683	4.1577	3.80225	4.34903	4.34092	5.63282	4.10957	4.89422	4.61735	5.55703	4.14865	4.3971	3.66663	3.92811	4.44733	5.58102
514	-3.33056	-0.990388	-2.70486	-0.908823	-2.0358	-0.96893	-1.64576	-0.862837	-1.78606	-2.84195	-3.43831	-0.334535	-2.17926	-0.793529	-2.90158	-1.90507	-2.7302	-1.92719	-1.98691	-1.00564	-3.00078	-3.2966	-3.02688	-0.969938	-2.27526	-1.57583	-2.12144	-1.45776	-2.27123	-0.996036	-1.6448	-2.38496	-3.58949	-2.69341	-0.998613	-2.78666	-3.03011	-2.31341	-1.188	-1.97321	-1.21995	-1.0452	-1.10677	-2.71028	-1.05977	-2.1157	-1.97826	-1.36449	-1.26618
515	-2.10216	-0.430219	-0.958423	-0.192792	-3.38027	0.252402	-1.06176	-0.896082	-0.907851	0.417002	-1.2532	-0.617183	-1.43626	-1.01111	-2.85784	-0.976855	-3.14058	-1.46248	-1.22988	-0.560261	-2.52454	-3.01658	-3.02652	-0.598608	-2.84281	-1.32732	-1.08617	-0.391296	-2.03824	-1.44985	-1.46865	-1.19159	-2.43879	-1.77919	-0.70005	-1.53758	-0.869238	-2.84915	-0.906689	-1.21171	-0.925239	-0.990433	-0.689563	-1.50918	-0.488424	-2.87839	-1.34049	-0.880573	-0.853061
516	-2.4368	-0.222107	-1.84986	-0.614343	-2.33581	-1.13479	-2.68801	-0.888844	-2.29406	-2.24787	-1.34345	-0.649192	-2.45675	-1.10093	-2.15677	-2.34113	-2.77278	-0.551842	-3.10632	-1.17747	-3.13235	-3.81677	-2.73807	-1.69454	-2.38529	-3.2188	-3.55122	-1.41633	-1.73995	-1.30535	-2.02545	-1.10174	-1.73997	-2.0223	-0.913605	-2.27423	-2.84579	-1.60491	-0.78248	-2.40915	-2.34244	-1.47223	-1.10635	-1.37033	-1.32367	-2.30057	-2.63219	-3.09823	-0.755411
517	-1.36486	-0.675731	-1.26414	0.481373	-2.79924	-0.479121	-2.09377	-1.42432	-2.91401	-1.9115	-2.35855	-1.26633	-1.64803	-2.5408	-3.23395	-0.101643	-1.60227	-1.88266	-1.91834	-0.154952	-2.67965	-2.96841	-1.58333	0.351908	-1.69525	-2.422	-1.79459	1.42429	-1.43416	-0.908696	-2.17109	-0.385373	-2.56236	-3.2527	-1.00944	-2.89775	-2.20364	-2.57236	-0.891834	-2.84396	-2.72824	-2.0297	0.570114	-2.28359	-1.26845	-2.70582	-3.67647	-1.4752	-0.135467
518	-1.75478	-0.48354	-2.09485	-0.413661	-1.11366	-0.159584	-1.89859	-0.873911	-1.23184	-1.02511	-1.72936	-0.849689	-1.61114	-1.55904	-1.89817	-0.699009	-1.23067	-1.20599	-1.59043	-0.604021	-1.43734	-1.54492	-0.87356	-0.663395	-1.23053	-0.991908	-1.3207	-0.868423	-1.04829	-0.213544	-1.80521	-1.04281	-1.07307	-0.617913	-0.542155	-3.1811	-1.52093	-2.0152	-0.854286	-1.63093	-1.59696	-0.996669	-0.641878	-2.00032	-0.903977	-1.79629	-1.36319	-0.824408	-0.545091
519	4.09295	5.10467	3.97268	5.26496	4.03254	5.14995	3.8363	4.94492	4.62971	4.78804	4.42936	5.36103	3.4935	4.67419	3.6796	4.8571	4.02638	4.15732	4.68661	5.12139	3.89874	3.48944	4.47087	5.32509	4.17759	4.95956	4.48884	5.15617	4.56535	4.89848	4.04231	4.87109	4.98404	4.61948	4.42899	3.78349	4.19233	4.20381	5.11599	3.86719	4.895	4.4263	5.24375	4.33814	4.65563	2.96499	3.58148	4.54271	5.23997
520	0.507243	1.23545	0.0168853	0.952349	-0.00653315	1.51318	0.0043869	0.199264	0.390112	-0.28429	0.224419	1.05971	-0.206601	0.510219	0.260992	0.925508	0.0250416	-0.0934229	0.120418	0.868227	0.222184	-0.049993	-0.144592	0.978798	0.217965	1.30852	0.175366	1.38026	0.240242	0.812739	-0.118264	0.622976	0.922447	1.12503	0.336084	-0.283284	0.240146	0.001194	1.03106	-0.148355	0.269038	0.610171	1.45709	0.164196	0.287058	0.309856	0.0962696	0.411044	1.30031
521	-3.26917	-0.856021	-2.05344	-0.224967	-2.53807	-0.590111	-2.09694	-0.702409	-3.06235	-0.512126	-0.675149	-0.522452	-3.24185	-2.20367	-2.8383	-1.15917	-2.44871	-1.61968	-0.84482	-0.519356	-2.30264	-2.91636	-2.67336	-0.290752	-2.41848	-0.502209	-1.95601	-0.410728	-0.349231	-0.278032	-2.56241	-2.63025	-0.448112	-1.29042	-0.774729	-2.89937	-2.54263	-3.50601	-0.502642	-2.91459	-2.41195	-2.03676	-0.712859	-3.13393	-3.37037	-2.68097	-1.92772	-0.497155	-0.264958
522	1.26727	2.70995	1.31961	2.10572	1.20227	2.34446	1.14189	1.56096	1.54833	1.08857	1.472	1.84552	0.8897	1.8427	0.583934	2.19997	1.20143	1.71081	2.05299	2.24267	1.17696	1.39816	1.74676	2.68597	1.2281	2.87892	1.38525	2.6104	1.70794	1.64512	0.899218	1.89895	2.72584	2.61777	1.24702	1.04089	1.19832	1.36861	3.6142	1.18478	1.86003	1.20699	2.61704	1.24148	1.87226	0.51197	0.870928	1.2412	2.27543
523	-1.77985	0.0305595	-1.72036	-0.505267	-2.11887	-1.19324	-2.79418	-0.445848	-2.83523	-2.98074	-2.006	-1.06028	-1.48514	-3.07683	-2.67155	-0.830983	-1.62912	-2.89073	-2.50427	-1.02702	-2.46223	-2.82365	-2.07874	-0.839308	-2.21793	-2.85842	-1.94779	-1.3074	-1.55104	-0.591408	-2.8748	-1.80732	-1.95271	-1.79178	-2.15005	-2.49777	-4.03466	-2.38224	-1.1639	-2.14503	-1.40866	-2.73869	-0.819334	-2.5657	-1.25636	-3.26908	-2.60737	-1.30808	-1.11107
524	0.0705457	0.0368032	-0.377431	0.614419	-0.082788	0.968211	-0.684988	-0.540138	0.0424623	-0.489694	-0.335595	0.680797	-0.709724	0.576863	-0.368238	0.636522	-0.149078	-0.0967531	0.391768	0.841324	-0.129395	-0.100511	0.00777817	0.525408	-0.172136	1.54877	-0.186863	1.70033	0.0955858	0.399683	-0.420557	0.271915	1.18184	-0.706994	-0.467182	-0.615	-0.134749	-0.416014	0.898499	-0.147216	-0.0879488	0.356794	1.21757	0.069602	0.596844	-0.643756	-0.476109	0.0978246	2.08632
525	-0.896491	0.991415	-1.31418	-0.18849	-2.95914	0.634147	-1.16317	-0.841968	-2.68463	-2.66399	-1.99446	-0.581247	-0.895896	-0.781808	-2.35274	-0.784552	-1.41114	-1.43124	-0.737516	-0.89215	-0.945708	-1.25696	-1.04319	-0.829041	-0.686719	-0.474762	-1.05186	0.486587	-3.09913	-0.388442	-1.04736	-0.660036	-0.738735	-0.25909	-0.85637	-1.37577	-1.44885	-1.05269	1.11939	-3.12286	-0.697168	-0.629498	-0.0966492	-1.83883	-0.778459	-2.48088	-2.10261	-0.763224	-0.112888
526	-0.456053	-3.08827	-0.165374	-1.42388	-0.210332	-1.51422	-1.10074	-1.92072	-0.952521	-2.71257	-0.910863	-2.05527	-0.92226	-1.83778	-0.964369	-1.49631	-0.331792	-0.534517	-0.881601	-0.839179	-0.471527	-3.4602	-1.2264	-1.24766	-0.48624	-1.18782	-0.596771	-1.56057	0.00161362	-0.732066	-0.532076	-0.56893	-1.25728	-0.639897	-1.72004	-3.32318	-0.476324	-0.692744	-1.62582	-0.788851	-3.42868	-1.04037	-1.72693	-0.872543	-1.19916	-0.895865	-1.15285	-0.783961	-1.89845
527	0.978586	2.04405	0.566756	1.3311	0.560806	2.10047	-0.143448	0.269709	0.805227	-0.124003	0.601007	1.67426	0.372932	1.58202	0.408761	1.44876	0.810832	0.232085	0.821548	1.69593	0.622555	1.02915	0.342474	1.38459	0.688411	1.92576	0.536265	2.29995	0.895667	1.41952	0.195384	0.995877	1.48749	2.96275	0.176433	-0.561152	0.179408	0.182812	2.35932	0.193602	1.53746	0.998087	1.99475	0.452898	0.710181	0.511911	0.0887098	0.485558	2.18033
528	6.51995	6.19985	6.22601	6.87569	6.49983	6.93162	5.77389	6.40442	5.84154	6.02882	6.19675	6.16307	6.00402	6.68326	5.65241	6.9517	6.26194	6.34772	5.94992	6.90492	6.25778	6.4023	5.7893	6.71568	6.36212	6.9248	6.68932	7.33479	6.23751	6.64736	5.50098	6.51155	7.75587	5.61628	6.39934	5.27114	6.12126	5.97624	7.27907	5.5878	6.03544	6.19793	6.97373	5.88383	6.31212	5.39897	5.81549	6.22755	8.06849
529	-0.615126	-0.08494	-0.432484	-0.0349817	-0.887195	0.467338	-0.71169	-0.371716	-0.597755	-0.495139	-0.986902	0.189368	-1.12882	-0.431085	-0.96316	-0.343108	-0.918489	-0.716399	-0.480443	0.0151477	-0.983618	-0.209889	-0.186442	-0.0217843	-0.640225	0.0324745	-0.32004	0.0355453	-0.556033	-0.425494	-0.85844	-0.272765	-0.13676	-0.278514	-0.32903	-0.767622	-0.85519	-0.44943	0.612948	-0.888763	0.481605	-0.130799	0.0837984	-0.847974	-0.503296	-0.877289	-0.509183	-0.499487	0.20648
530	-0.475983	-0.652096	-0.356027	-1.99974	-0.016295	-2.08212	-1.73798	-2.34782	-1.03464	-3.61118	-1.52167	0.10636	-1.17605	-2.05883	-0.743229	-0.696697	-0.90112	-1.0489	-1.36487	-1.91601	-0.3992	-3.10668	-0.793471	-1.57959	-0.421704	-2.31823	-0.464439	-1.63527	0.11336	-1.51707	-1.90435	-1.67132	-1.34887	-1.37722	-2.32919	-2.86433	-0.617484	-0.865972	-0.687195	-0.331258	-2.33722	-0.897454	-1.71619	-0.974517	-1.46589	-1.01431	-1.45295	-0.959566	-2.7747
531	0.221448	-0.0625076	-0.0287499	1.17085	0.292383	0.621849	-0.502273	0.656481	0.145196	-0.104055	-0.837258	1.30679	-0.480024	0.215169	-1.01418	-0.154409	0.246891	-0.223185	-0.202554	0.57804	-0.0667992	0.199056	-0.424951	0.939474	0.194017	-0.0442219	0.240545	0.477077	0.35114	0.397223	-0.30249	0.105576	-0.299574	-0.490295	0.436574	-0.767203	-0.150749	-0.81468	0.483602	-0.154773	0.498405	0.50604	0.937767	-0.00553322	0.411391	-0.54771	0.0124159	-0.0159745	0.760895
532	3.96831	4.34932	3.85447	4.69128	3.976	5.19783	3.25419	3.99585	3.70435	3.20529	4.25547	4.3516	3.57982	4.67237	3.06229	4.58689	3.83868	4.21165	4.55346	4.90152	3.74824	4.56231	4.23755	6.10641	3.58634	5.37888	3.83775	5.13531	4.14752	4.33124	3.41089	4.26363	4.77929	5.13934	3.86345	3.21421	3.2906	3.8969	5.56459	3.40151	4.03841	4.05536	5.24491	4.33435	4.44458	3.1148	3.32085	3.53454	4.95546
533	2.93135	3.89785	2.96475	4.35441	3.00605	4.14641	2.37851	2.60022	2.75007	2.46071	2.98364	3.68585	2.65016	3.0012	1.97518	3.70801	2.85791	2.46647	2.94998	4.03162	2.74657	2.48517	3.11335	4.398	2.76947	3.79531	2.94844	5.68614	3.21027	3.19443	2.44719	3.7434	3.05163	2.82836	2.48322	1.87647	2.69617	2.68314	4.82645	2.36464	2.60716	2.78075	4.0825	2.795	3.33462	2.32888	2.14562	2.60418	4.56552
534	2.38733	0.706443	2.52485	2.05657	2.78555	2.04147	2.4365	2.35798	2.5752	4.22549	2.28179	1.27199	3.47308	2.20578	3.28831	2.09002	2.99917	2.78196	2.10147	1.88342	2.77528	1.54311	2.88063	1.43187	2.50012	2.21195	2.46289	0.982501	1.97363	1.52417	3.63626	2.36655	2.09555	2.31765	1.64312	2.63352	2.99789	2.45611	0.889669	3.29804	1.88851	2.74063	1.76449	2.35798	1.88815	3.17581	2.57719	3.32591	2.17929
535	1.50775	2.40309	1.49596	2.65244	2.01669	2.6913	1.21163	1.83099	1.54491	1.25049	1.47854	2.44209	1.20625	1.87283	0.774219	2.38978	2.40436	2.15454	1.50989	2.08005	1.19486	2.55605	1.76563	2.88416	1.43601	1.97434	1.85386	2.81671	2.2663	2.02558	1.22928	2.08051	2.26768	2.62311	1.69212	1.14735	1.74084	1.36091	3.74433	1.37022	2.44366	1.95755	2.63691	1.96051	2.38756	0.661609	1.30624	1.89347	2.66621
536	0.615728	0.213662	1.52885	3.39913	0.243216	1.426	1.16889	1.69204	-0.0433216	-0.107605	0.263181	-0.954906	0.499848	-0.196964	-0.0102859	1.73137	0.856348	1.42381	0.913818	1.38791	0.250754	2.89897	1.63457	2.49602	0.176765	2.67205	1.74068	4.01593	-0.25017	1.40338	0.605882	1.29489	4.34473	0.0243607	0.607483	1.16349	0.0677471	1.28984	2.78146	1.30295	2.47987	1.61507	3.81532	-0.143909	3.07293	-0.947129	0.374681	0.837571	2.69975
537	5.14406	0.430693	5.37499	4.45405	4.9757	4.36653	5.12032	5.00976	5.24912	4.82421	5.55274	2.08609	4.87254	3.4051	4.82294	4.41591	5.26044	4.43077	5.88755	5.7168	4.2438	3.88749	5.52161	5.30228	4.90783	3.06832	5.75738	3.86548	5.30416	5.06487	5.19769	5.82152	4.75933	3.99771	4.85384	5.11756	5.42838	5.56644	3.21446	4.66324	4.68577	4.8382	2.72881	4.09619	4.43395	3.97865	4.20706	4.52282	2.76526
538	0.657694	-1.20203	-0.357938	-0.602657	-0.400352	-0.686578	-0.234795	-0.879062	-0.332081	-1.13413	-0.0863552	-1.25898	0.255248	-0.0815229	0.0466132	-0.847712	-0.320298	-0.407552	-0.0603204	-0.502026	-0.0593233	0.193873	0.0605841	-1.08599	-0.182888	-0.677056	-0.0390191	-1.24078	-0.761217	-0.716382	-0.0798364	-0.136551	-2.01301	-0.939651	-0.816011	-0.510421	-0.47644	0.171063	-0.67811	-1.12809	-1.1905	-0.859281	-1.65339	0.0179329	-0.76708	-0.222086	-0.668608	-0.822387	-1.86644
539	2.10313	2.21873	1.96133	2.87578	2.0805	3.01656	1.43871	1.95644	2.33291	1.54381	1.75952	2.90365	1.66029	2.61934	1.80179	2.68445	2.01857	2.11766	2.31766	2.68833	1.98667	1.79744	2.06598	2.7505	2.15999	3.30668	2.17085	3.61242	2.50223	2.5586	1.68486	2.42365	2.9926	2.46908	1.72077	1.34728	1.76507	1.69005	3.26781	1.75075	2.02275	2.36866	3.37376	1.91152	2.36093	1.40155	1.8605	2.07977	3.52293
540	1.62732	-1.86955	1.89298	-2.40944	-0.547699	-2.4632	-0.118697	-0.23834	1.09473	-0.500339	0.521457	-2.13845	0.124763	-0.0512466	2.10196	0.287824	1.1665	0.684469	-0.175069	-0.408487	-0.0359583	0.764889	-2.25233	-0.69842	0.00930786	-0.170122	0.503592	-0.0588932	0.0866241	0.13187	-0.0358653	0.452127	-2.18648	0.15097	-1.36752	0.0386763	0.793856	0.41626	-0.680573	0.934106	-3.17371	0.835701	-0.800764	0.661201	-0.457184	-0.179744	0.583922	-0.908062	-2.18534
541	2.3247	1.70089	1.64343	6.30573	0.300851	3.08749	1.6231	2.72285	-2.50179	2.30244	-2.24696	-1.19835	1.63052	-2.50836	-2.838	-2.30042	1.66943	0.173023	2.26194	4.10949	-3.00525	-0.626331	2.93397	5.63189	2.20698	-1.78408	1.37199	7.32016	0.275413	3.12828	2.65777	5.31112	1.25004	0.00288296	1.91101	-0.733767	-0.437684	0.392908	3.86156	0.71012	2.85279	2.68667	6.54937	1.5767	2.58543	0.841758	1.25456	1.25782	5.05089
542	0.0600448	0.171727	-0.0247817	0.852813	-0.306103	1.96397	-0.369078	-0.493238	0.6307	-0.149776	0.208259	1.93439	-0.443542	1.43892	0.202751	1.78173	-0.0961208	-0.0465584	0.657589	0.96239	0.183614	0.699368	0.178843	0.248555	0.333168	3.00827	0.0541377	2.55438	0.165597	0.360884	-0.175753	-0.00139713	2.1845	-0.0635281	0.135839	-0.367277	0.117549	-0.0139046	1.11383	0.341337	0.796642	0.708898	1.67977	0.512068	1.0229	-0.228608	-0.65166	0.578549	2.88282
543	1.77966	2.40172	1.90186	2.74742	1.79941	3.47856	1.11142	1.90813	1.59635	0.890553	2.21574	2.21746	1.1398	2.4182	0.593058	2.79909	1.64228	1.87973	2.69075	3.11641	1.38965	2.5772	2.48839	4.38181	1.47624	2.95001	2.18358	3.55128	2.15475	2.39981	1.22111	2.15712	3.22463	3.35383	1.42602	0.958623	1.52212	1.34595	4.91965	1.1843	2.04459	1.82706	3.24058	1.96654	2.38176	0.617268	1.26677	1.3718	3.30594
544	-1.56408	-0.7131	-2.01112	-1.09178	-2.9674	-0.805937	-2.78186	-1.74123	-1.32217	-1.21832	-1.98427	-0.998492	-2.00918	-1.75491	-1.34756	-1.28398	-2.42234	-1.31043	-1.78467	-0.688526	-1.57379	-1.9053	-0.940267	-1.085	-3.0855	-0.808538	-0.720222	-1.03319	-1.48503	-1.22481	-2.22589	-1.2558	-1.162	-1.05125	-1.50757	-2.20127	-3.06486	-1.85539	-0.793715	-2.77037	-1.1683	-1.17517	-0.667967	-3.3324	-1.54294	-2.24398	0.919752	-1.19457	-0.818764
545	0.445384	2.78692	0.422461	2.39885	0.495432	3.04899	0.0927305	1.08824	0.425511	-0.219772	0.720259	1.41277	0.365009	1.35142	0.0657783	1.24965	0.682423	1.10071	0.222077	1.39663	0.485832	1.24564	0.482776	1.75269	0.533783	0.560447	0.417783	1.92291	0.739971	2.96909	0.349802	0.942719	0.463008	1.62947	1.44559	0.0283155	0.42816	0.183372	0.910671	-0.173643	-0.00390244	0.87135	1.4002	0.203273	0.858586	0.14355	0.598175	1.46001	1.38816
546	-0.564931	0.789508	-0.402367	0.162755	-0.58566	0.288751	-0.759059	-0.502476	-0.336776	-0.0667486	-0.50915	0.708063	-2.18846	0.492864	-0.611845	0.240751	-0.68757	-0.0861683	-0.264922	0.291786	-0.623242	-0.248868	-0.48889	0.332849	-0.297726	0.279313	-0.321869	0.378551	-0.091363	-0.221443	-1.1436	-0.126999	0.350578	-0.0646	-0.23943	-0.325692	-0.344894	-0.469923	0.65591	-0.494112	-0.0935574	-0.0654478	0.138206	-0.155985	-0.111211	-1.65546	-0.528906	-0.487765	0.452748
547	1.11016	1.72621	1.01284	2.01055	1.50622	1.69999	0.831271	1.37052	1.22482	0.765784	1.40379	1.7949	0.9814	1.70618	0.208015	2.07515	0.988634	1.49425	1.4422	2.11296	0.978523	1.82621	1.63868	2.4686	1.08509	1.7995	1.26201	1.94711	1.464	1.4156	0.832822	1.4973	2.0583	1.57043	1.20185	0.928109	0.986577	1.15042	2.80869	0.955997	1.83885	1.37683	1.96209	1.15244	1.41033	0.428097	0.889036	1.17791	2.11629
548	0.799055	2.37637	0.151219	1.81208	0.544971	2.24014	0.452277	1.60865	0.345669	0.398518	-0.0247774	1.38685	0.715215	0.36767	0.00248861	0.383873	0.551626	0.700828	0.47171	1.23133	0.392859	0.23306	0.641481	1.23088	1.05685	0.413763	0.639246	1.75153	0.534723	2.19897	0.0336366	0.874187	0.997178	1.78463	1.49114	0.28139	0.514642	0.519902	2.04835	0.0984011	0.477592	0.826912	1.7968	0.434556	0.773458	-0.0575819	0.360751	1.16989	1.84768
549	1.044	1.00749	0.803026	0.429481	0.887142	-0.162763	0.351993	-0.288777	0.42015	0.485091	0.885152	-1.68256	0.769188	-0.576727	0.656593	0.197513	0.99098	0.859217	0.888664	1.21233	0.835371	-0.205092	0.840462	0.127127	0.404306	-0.677704	0.815199	-0.327344	1.20144	0.0830383	0.165412	0.245279	-0.656549	0.432433	0.541734	0.419498	0.723392	0.597146	1.19955	0.366162	-0.83962	0.207617	-0.602711	0.828347	0.136798	0.14729	-0.0639315	0.259038	-1.12381
550	0.715827	1.01145	0.471878	1.65313	0.621685	1.28413	0.315879	1.13463	0.506666	0.240707	0.273456	2.09733	0.501333	1.39144	0.343242	0.670407	0.229671	0.569308	0.069325	0.792181	0.732303	0.313842	0.114662	0.79418	0.799436	1.06028	0.705867	1.13046	0.686146	1.19499	0.307209	0.832395	1.12852	0.281378	0.658461	0.293231	0.611378	0.586595	1.25517	0.208833	0.669688	1.23454	1.43615	0.452904	1.17501	0.315278	0.63543	0.750911	1.60679
551	-0.0786452	0.332096	-2.04347	0.264364	-3.13854	0.887185	-2.7242	-2.00787	0.628608	1.78634	1.37488	0.876712	-2.76587	-0.50421	-2.75967	-0.636658	-3.59801	-0.538624	-0.135076	0.641568	-2.87916	-1.07573	0.836514	0.217967	0.131489	-0.445213	0.411285	0.0343742	-2.6523	1.06096	-2.33838	0.22044	0.244964	-0.712356	1.42184	-2.49485	-2.71979	0.268968	0.223152	-3.29961	-2.5551	-1.85346	-0.1184	-0.0994272	1.73551	-1.94574	-2.57196	-2.49388	0.218366
552	-0.0573764	-2.23221	-0.113726	-0.279428	0.124412	-1.09024	-0.376543	-0.833871	-0.81496	-0.972041	0.334268	-2.31775	-0.343936	-2.59971	-1.02045	-1.25168	-0.427444	-0.56381	-0.340741	-0.127305	-0.31796	-2.84208	-0.0131636	-0.296541	-0.30375	-1.66856	-0.245709	-0.400979	-0.34595	-0.505545	-0.529991	-0.0990906	-1.4977	-1.38837	-0.851448	-0.517252	-0.0641756	-0.176167	-2.29859	-0.880275	-1.32047	-0.897204	-1.4851	-0.196363	-1.43754	-1.05487	-0.918214	-0.831035	-0.887897
553	-0.511353	-3.0869	-0.620436	-2.31004	-0.415595	-0.877272	-0.672206	-2.77627	-0.0287895	-1.87906	-0.160358	-2.09468	-0.642313	-0.493621	-0.357084	-0.299263	-0.593592	-3.47717	-0.501606	-1.03044	-0.340526	-2.371	-0.654999	-0.846999	-0.186419	-0.611235	-0.735246	-0.968708	-0.497751	-0.605445	-0.436119	-0.355201	-0.724767	-1.22064	-2.87578	-0.491448	-0.162966	-0.448646	-0.801381	-0.422847	-1.73205	-0.575068	-0.540178	-0.462527	-0.699412	-0.152746	-0.479297	-0.322479	-0.387483
554	-0.191405	0.929361	-0.371027	0.365768	-0.206093	1.0838	-0.263047	0.585716	-0.366473	-1.11434	-0.139367	0.674096	-0.435481	0.143962	-0.534099	0.604307	-0.493696	0.00342083	-0.249921	0.288054	-0.399391	-0.413496	-0.212652	1.04702	0.179089	1.85015	-0.199661	0.604589	-0.394293	0.335757	-0.390059	0.0432653	1.16804	0.856747	-0.125235	-0.624975	-0.794791	-0.182413	1.9943	-0.630198	-0.147223	0.282001	1.22356	-3.80074	0.155661	-0.678095	-0.555536	-0.43308	-0.0192137
555	5.41527	6.09016	6.11374	4.37921	6.30434	3.90095	5.36461	5.10128	6.13957	4.7117	4.60067	2.70115	5.9024	4.99075	4.3818	7.16629	5.57577	5.08058	5.34869	4.97697	5.56728	4.92456	5.41234	5.10698	5.34341	4.73104	6.34193	5.12201	6.45619	4.4696	5.84199	5.70919	3.46318	5.08069	4.45573	5.4141	6.57645	5.76685	4.69853	5.66001	4.42382	5.01556	4.86196	5.13786	5.10035	4.82662	4.81857	5.77984	3.98526
556	-0.425813	0.87229	-0.388582	0.708257	-0.793161	0.905611	0.111982	0.295939	-0.32497	-0.356394	-2.80014	0.785897	-0.452278	0.370449	-0.337649	-0.100229	-0.135377	-0.608818	-0.224785	-0.460432	-0.0127935	-0.397153	0.0662975	0.253742	-0.225022	0.602348	-0.194226	0.676869	-0.0932531	0.710863	-1.01938	-0.0513201	0.587396	-0.294048	0.151563	-0.700603	-1.03693	-1.54072	0.391128	-0.207827	0.166968	0.051692	0.783086	-2.95981	0.339889	-0.644507	-0.286384	-1.47109	0.188056
557	0.61129	0.0487585	0.0821967	1.66552	0.363078	1.43141	0.990132	1.56935	0.816117	0.607118	0.694961	1.79033	0.176981	1.02498	0.120354	1.23239	0.609566	0.784364	0.989182	1.56825	0.504191	0.354617	1.25488	1.94786	0.787467	1.53789	0.898687	2.27198	0.831638	1.50546	0.485451	1.53815	1.91595	1.81662	1.16289	0.119965	0.916489	0.860307	1.95082	0.364436	0.811611	1.11751	1.90801	0.842632	1.52611	0.177979	0.53476	0.863277	1.87906
558	-0.975312	-0.463862	-1.03956	-0.256911	-0.636837	-0.285351	-1.70545	-0.659558	-0.86382	-0.0710058	-0.444632	-0.23352	-3.03099	-0.0187721	-2.80199	0.162225	-1.18191	-2.95015	-0.696932	-0.454895	-0.989244	-0.640476	-1.0307	-0.58922	-0.858046	-0.0169868	-0.498995	-0.0909538	-0.787642	-0.678659	-1.34537	-0.638553	0.216107	-2.37405	-0.672044	-1.29562	-3.12525	-1.66349	0.000968933	-0.912414	-0.632087	-0.780252	-0.0616636	-0.558597	-0.690289	-1.14664	-1.11672	-2.82401	-0.253549
559	-1.09829	1.08934	-1.24947	0.888171	-0.742051	0.372962	-1.46748	0.443463	-0.995974	-0.290427	-0.950324	0.305065	0.459402	-0.583261	-1.32394	-0.837448	-0.754432	-0.688443	-0.737647	0.33546	-1.08938	-3.2297	-0.699096	0.36919	-0.907104	-1.49367	-0.801601	0.00730705	-0.70976	0.586898	-1.26851	-0.442964	-0.764116	-1.01159	-0.0951262	-2.54892	-0.958629	-0.211895	0.343152	-2.39099	-0.426663	-0.478032	0.389028	-0.624222	-0.085104	-1.48365	-0.792126	-0.37658	0.46465
560	0.0361934	0.923335	-0.0769887	0.877584	-0.205916	0.740952	-0.2272	0.473437	-0.148686	-0.0402384	-0.0127888	0.761951	-0.10146	0.121522	-0.254237	0.311259	-0.0107794	0.0347347	0.263364	0.612994	-0.00973225	-0.252684	0.162723	0.633896	0.0151701	0.508021	-0.0235839	1.2856	-0.0811081	0.454906	0.104702	0.277111	0.663962	0.306966	0.172179	-0.212117	-0.0974474	0.0751238	1.18939	-0.209938	0.263638	0.209881	0.9115	-0.102952	0.0213375	-0.316014	-0.161813	-0.0121617	0.978389
561	3.57591	0.600394	3.11549	3.00641	3.13403	2.14254	2.59058	2.35847	2.52413	1.90678	3.01527	1.61993	3.051	2.36455	2.76888	1.93791	3.05685	2.88118	2.8666	2.69457	3.05786	2.77656	2.90089	2.44492	2.70484	2.23274	3.37422	2.36717	3.10489	2.84866	2.62325	2.92153	2.0449	2.37053	2.15617	2.41244	3.34858	3.18778	2.03834	2.40465	1.53652	2.96704	1.70011	3.12939	2.29154	2.56394	2.57922	2.70912	2.39065
562	1.16189	1.76218	0.47824	1.96083	0.695274	1.93161	0.148321	0.590965	0.310696	-0.192755	-0.124122	1.0223	0.158062	0.976472	0.595809	1.05273	0.718974	0.483613	0.797668	1.41384	0.846449	-0.0118032	0.491796	1.15916	0.552617	1.55823	0.646089	2.84167	0.571394	0.897067	0.508322	1.28141	1.30041	0.735522	0.46341	-0.214873	0.830201	0.241692	2.26433	-0.0270119	0.475652	0.90093	2.28758	0.0644321	0.788445	-0.491213	-0.125964	0.610943	2.32297
563	0.128303	-4.12895	-0.102182	0.0653801	-0.0703397	0.158222	0.107373	-0.0907326	0.53663	-0.755985	-0.43515	-1.90142	-0.197806	-0.15071	0.244702	-2.98972	-0.349544	-0.379331	0.505197	0.573012	0.234495	-3.10597	0.558278	0.160906	0.388532	-2.46735	0.205324	-2.69698	0.125536	0.478644	-0.0618072	0.627559	0.385097	0.0463839	-0.210364	-0.200082	0.0103178	0.193101	-3.09574	0.108061	0.143845	-0.409756	-2.48669	0.102512	0.471543	0.144456	-0.139935	-0.0765862	-0.365206
564	3.40214	4.37263	3.03681	3.99379	3.16702	4.27259	2.52701	3.06866	3.36092	2.46921	3.02576	3.85956	2.83787	3.76199	2.98196	3.83569	3.07333	3.22668	3.48409	3.97315	3.15042	3.00317	3.20732	4.075	3.22042	4.33718	3.19727	4.73523	3.50029	3.70087	2.83858	3.57669	3.97721	3.80119	2.80644	2.42868	3.03279	2.89247	4.6329	2.79776	3.23816	3.46602	4.38575	3.10874	3.50747	2.63451	2.82387	3.40341	4.66376
565	0.345881	1.10129	-0.228686	1.26205	0.220286	1.35737	0.151902	0.643375	-0.383258	-0.133443	-0.2302	0.813755	-0.102229	-0.718596	-0.545489	-0.404416	-0.488391	0.203987	-0.0911651	0.719705	0.0803766	-0.780347	0.392166	0.684267	0.509838	0.66269	-0.176504	1.81698	-0.417389	1.47351	-0.910394	-0.0820217	1.18556	0.500638	1.03641	0.0667686	0.339389	0.248522	0.846111	-0.732512	0.602837	0.253175	1.57008	-0.000406265	0.528237	-0.00791454	0.103156	0.760685	2.26788
566	-1.3741	-1.76523	-2.14904	-1.08726	-1.81706	-0.583104	-2.08907	-1.02859	-1.43496	-1.85705	-1.51405	-0.879169	-2.11496	-0.751411	-2.37369	-1.31881	-1.86578	-1.74235	-1.01377	-1.01548	-1.69394	-1.14749	-1.45677	-0.651081	-1.57117	-0.633996	-1.35985	-0.695015	-1.35366	-1.13911	-1.7165	-1.10891	-0.493209	-1.3338	-1.73807	-2.25654	-1.80732	-1.84748	-0.273783	-1.41989	-1.11016	-0.940888	-0.585934	-2.16366	-1.36443	-2.9977	-2.36889	-1.68106	-0.727089
567	5.13341	6.37646	4.78193	5.72543	4.86861	6.09055	4.56129	4.9323	4.77169	4.03799	4.75873	5.64949	4.5715	5.4893	4.43632	5.65773	4.65013	4.73403	5.1164	5.73965	4.83047	4.59203	5.05431	6.36391	4.84779	6.12128	4.93041	6.63589	5.11485	5.52061	4.52402	5.496	5.63558	6.111	4.64767	4.2113	4.69415	4.68206	7.00058	4.29596	4.99602	5.02202	6.20081	4.56498	4.92298	4.09364	4.35351	5.03001	6.17716
568	2.06346	0.20906	2.75652	1.05006	2.35571	0.271785	1.7752	0.980101	1.79156	0.772765	0.396821	-2.44006	2.12714	-0.731755	2.80119	0.504632	1.99193	2.64185	0.510743	0.697128	1.31826	-0.304451	0.765894	0.440918	1.37749	-0.622818	1.52086	-0.27811	1.53212	0.831566	1.99637	1.40127	0.368798	0.996909	0.701777	1.34515	1.63493	1.09159	0.257614	1.87731	0.412615	0.639841	0.0774527	0.724833	0.358817	1.53007	1.80425	1.59314	-2.29488
569	-0.0563045	0.850398	-0.39644	0.854029	-0.27272	0.654104	-0.0495176	0.674286	0.0365992	0.269181	0.282408	0.804916	-0.842504	-0.142894	-0.712161	-0.196389	-0.362346	-0.0949249	0.325108	0.680141	-0.347491	0.0534177	0.498798	0.856036	-0.297388	-0.102363	-0.139118	0.616514	-0.198415	0.447544	-0.389452	0.127953	0.534434	0.54277	0.28685	-0.572212	-0.629459	-0.203171	0.630054	-0.332398	0.103209	0.382817	0.654472	-0.0560694	0.486992	-0.902299	-0.659184	-0.0896239	0.938456
570	1.21235	2.38028	0.765477	1.95781	1.11783	2.80744	0.531039	1.13243	1.38416	0.983817	0.354275	2.51007	0.80595	1.74282	1.03307	2.23619	1.23109	1.24405	1.23898	2.24721	1.29426	1.04136	0.885315	1.45855	0.956846	1.80551	0.938767	1.75133	1.61747	1.84138	0.973288	1.63437	0.694488	3.12455	1.32378	0.657818	1.46744	0.957875	3.2015	0.789327	2.26066	1.61541	3.43309	1.13351	1.63449	0.621696	0.974098	1.34576	2.0208
571	-0.598882	0.212523	-1.02161	-0.802752	-0.0415854	-0.690435	-0.43784	0.321204	-2.7934	1.68373	-0.48315	1.6143	-3.48295	-0.460672	-2.58749	3.14793	-0.948892	-0.830608	-3.77466	0.53541	0.0101318	0.59863	-1.03673	1.8419	0.783692	2.73355	-0.486475	-0.771235	-2.32802	-0.916588	-0.99693	0.22448	0.329608	-2.71851	0.510368	-0.894882	-2.8923	-1.64696	-2.79033	-2.43539	-0.290048	-1.97289	1.34002	-1.89788	0.935493	-2.77049	-2.38879	-2.60815	-2.7288
572	-1.2609	0.0699186	-1.21089	-0.291663	-1.10743	-0.221513	-1.63261	-0.705222	-0.746815	-1.55934	-1.39548	-0.254484	-1.9285	-0.437373	-3.1345	-0.410375	-0.881989	-0.723643	-0.532159	-0.179553	-0.695009	-1.09731	-0.857024	-0.244343	-0.71344	-0.140355	-1.31634	-0.204955	-1.00838	-0.596517	-1.72761	-0.699268	-0.157989	-0.375923	-1.54562	-2.21361	-3.17975	-1.08616	0.120318	-1.07176	-0.72197	-0.711529	-0.239597	-1.69022	-0.881746	-2.00622	-1.36347	-1.54804	0.0227566
573	-0.864461	-1.40039	-1.14899	-1.56225	-0.779534	-1.65703	-0.928248	-1.68608	-1.18327	-1.07964	-1.43295	-2.25863	-1.0373	-2.14947	-1.0873	-1.4951	-0.917369	-1.51771	-1.47402	-1.72768	-0.958872	-2.4722	-1.50312	-2.39554	-0.731984	-2.3515	-1.17459	-2.82712	-0.982203	-1.53005	-1.30081	-1.54889	-1.09464	-1.58745	-1.47388	-1.1947	-0.983939	-1.24481	-1.73211	-1.2155	-2.45293	-0.810597	-1.06793	-1.71977	-1.90144	-1.38478	-1.10409	-1.24382	-2.17168
574	0.915776	0.714231	0.679357	1.56736	0.651746	1.21792	-0.109231	0.993987	0.347412	0.201035	0.694615	1.05141	0.353601	1.14752	0.0267777	1.2592	0.438446	0.874233	0.061049	1.09692	0.520215	0.663057	0.269512	2.01428	0.571031	1.13302	0.765825	1.30254	1.15569	1.21157	0.36541	0.818676	1.76144	1.5132	0.944097	-0.0944967	0.621236	0.224781	2.28296	0.228415	0.42619	0.711219	1.55906	0.893786	0.434216	-0.249046	0.0584593	0.638532	1.73048
575	0.501041	1.08077	0.363701	1.07196	0.310848	1.16389	-0.142292	0.314072	0.39355	-0.0805464	0.198261	1.25919	0.307156	0.994035	-0.152995	0.912839	0.186989	0.314703	0.47898	1.08644	0.744308	-0.0083909	0.347713	1.11011	0.463203	1.74916	0.300783	2.23138	0.296557	0.798878	0.2493	0.84152	1.35456	1.37936	0.226956	-0.173129	-0.0652685	0.0156279	3.04543	0.133547	0.541081	0.692228	1.76519	-0.0969849	0.495664	0.248846	0.34654	0.663352	1.95589
576	-3.54217	-0.468866	-2.28997	-1.56087	-2.23963	-2.14481	-2.51213	-2.483	-2.13562	-2.22678	-2.35153	-0.446087	-3.0908	-1.95116	-2.15525	-1.67554	-2.42115	-2.10558	-3.10967	-2.08895	-2.71357	-1.42431	-2.34473	-1.88415	-2.07351	-2.9404	-3.97492	-0.964453	-1.83546	-1.95816	-2.46747	-1.84493	-1.97223	-2.69253	-2.00228	-3.48537	-2.67272	-2.55605	-0.658831	-1.99497	-1.66348	-1.75569	-1.9346	-1.92721	-1.84997	-3.09517	-3.06044	-2.31731	-1.01038
577	0.00122309	-1.5138	-0.711257	-0.680034	-0.333754	-1.37557	-0.759825	-1.38256	-0.72893	-1.24729	-0.852942	-2.74819	-0.545494	-2.71183	-0.401362	-2.03971	-0.162681	-0.613091	-0.360893	-0.449181	-0.31291	-3.36485	-0.732082	-1.29936	-0.757838	-1.84246	-0.511449	-1.07081	-0.159467	-0.901544	-0.349002	-0.260144	-1.22064	-1.4769	-0.902411	-0.533804	0.0882864	-0.394238	-1.63083	-1.02556	-0.916923	0.0950031	-1.06323	-0.684025	-0.894688	-0.871095	-0.463004	-0.568959	-0.933804
578	1.73493	2.2905	1.18106	2.9993	1.30793	2.2539	1.01789	1.5069	1.49761	0.763753	1.53262	1.86418	1.15086	1.62031	1.21943	1.33191	0.978466	1.66231	1.50115	2.12431	1.26668	1.15192	1.46554	2.42618	1.48253	1.73774	1.40908	3.78123	1.24282	2.1676	1.31217	2.74987	1.38692	1.53596	1.34965	0.842761	0.966901	1.17798	2.18424	0.876731	1.4677	1.60948	3.31531	1.71082	1.53997	0.927456	1.10133	1.51732	2.86134
579	-2.70709	-0.319618	-2.24858	-2.41654	-1.37631	-0.775375	-2.81003	-0.753637	-0.987819	-2.08724	-2.2525	-0.881113	-3.1419	-0.477384	-2.42676	-0.468768	-2.37876	-2.99501	-1.06536	-0.779993	-3.2181	-2.57663	-1.97683	-0.641803	-3.23162	-0.373336	-1.75199	-0.606597	-0.720142	-0.809856	-2.71682	-0.882809	-0.475545	-2.76848	-1.08005	-2.84717	-0.956945	-0.845895	-0.803187	-1.67767	-3.05862	-2.28306	-0.330317	-0.656201	-0.758175	-2.39787	-2.65645	-2.02147	-0.145751
580	0.0563598	1.30368	0.210758	1.39176	-2.12601	0.14457	-0.105856	1.46206	0.263409	0.905716	0.527589	0.882427	-2.18832	-0.887886	-2.36845	0.129296	0.0927114	0.200134	-0.225993	0.71891	-0.463281	0.358623	-0.151052	0.629393	-0.0918503	-0.584877	0.37155	1.20025	0.130605	1.07662	0.309045	0.69359	-0.576464	-0.265469	0.818421	-2.618	0.08004	-0.50027	1.42536	-0.101958	0.279727	0.339117	0.899826	0.365067	0.0657625	-1.85064	-1.54139	0.0024581	0.639967
581	-0.00543928	1.28598	0.0218139	1.49469	-0.00508738	1.63183	-0.200645	0.707879	-0.229522	-0.416353	0.215859	0.416535	-0.0773878	0.473128	-0.255002	0.610676	0.0427608	0.285939	-0.105052	0.643139	-0.121376	0.468614	0.177809	1.31032	0.275588	0.422504	-0.00223589	1.24767	0.140124	1.70354	0.103888	0.577365	0.396842	1.52927	0.81116	-0.132109	-0.39992	-0.213561	0.699154	-0.404119	0.159652	0.389692	0.947371	0.228877	0.412743	-0.166139	-0.11897	0.732175	0.901524
582	0.0275521	1.93658	0.82837	0.483264	-0.215941	0.937278	-0.67585	-0.10221	0.371767	-0.0592012	0.285567	0.970979	0.26115	0.928512	-0.247588	0.697085	0.115827	0.0308218	0.307775	0.497675	0.215575	0.0172658	0.146792	1.25524	-2.05004	1.18763	0.263797	1.78293	0.0935488	0.164925	-0.405757	0.232773	1.42026	-2.12886	-0.229606	-0.439872	0.0963459	0.241293	1.00772	-0.245038	0.469375	0.518897	1.14047	-0.165833	0.0509033	-1.48543	-0.517225	0.0193429	1.51966
583	0.237148	1.94991	0.0223413	1.32242	0.284281	1.31208	0.31934	0.694534	0.223704	0.535448	0.513127	1.19747	0.13222	0.622583	0.10349	0.539864	0.158045	0.620785	0.628126	0.974217	0.115192	-0.18213	0.53704	0.873557	0.278079	0.71455	0.513571	1.04623	0.54657	0.753162	0.12468	0.592056	0.607947	0.498477	0.872055	0.240513	0.23128	0.481514	1.17352	0.0001297	0.658339	0.715281	1.28417	0.282305	1.01761	-0.697524	0.217101	0.470572	1.55043
584	-1.06077	0.618813	-1.21779	0.0652256	-1.16891	0.262385	-1.31344	-0.486137	-1.10052	-1.07899	-0.872131	0.127481	-2.90592	-0.72406	-1.27604	-0.76366	-1.34915	-1.15599	-1.36424	-0.497916	-1.0549	-1.29021	-1.26895	0.0253959	-1.23932	-0.585177	-1.46567	-0.468765	-1.12095	0.288934	-1.18991	-0.751235	-0.886071	0.641069	-0.89147	-1.60199	-1.24639	-1.15177	-0.416342	-1.50404	-1.03058	-0.570011	-0.196905	-1.28002	-0.903741	-1.37635	-1.0374	-0.580283	-0.0927734
585	-0.0727401	1.95468	-0.0561604	1.7624	-0.031364	2.29958	-0.313274	0.391364	-0.232275	-0.292364	-0.246798	0.547698	-0.372744	0.420588	-0.389625	0.433615	-0.018774	0.319424	-0.32961	0.782722	-0.095665	0.534198	-0.12464	1.05832	0.11135	-0.111468	-0.0537086	1.27825	0.134871	2.21237	-0.412203	0.145716	-0.0202551	0.782053	0.685749	-0.380624	-0.0269461	-0.315749	0.268574	-0.968439	-0.148229	0.271215	0.687108	-0.0561657	0.00757599	-0.494271	-0.101502	0.725476	0.518564
586	0.626515	-0.288366	0.633132	-0.133335	0.840491	-0.529473	-0.250181	-0.373693	0.481076	-0.845019	-0.0271931	-0.602889	0.540007	-0.650871	-0.464612	-0.716493	-0.00810146	0.183196	0.328679	0.179406	-0.0721464	-0.748718	0.884945	0.70316	0.126367	-1.30938	0.391756	-1.04591	0.405839	0.24688	-0.343582	0.39712	-0.778172	-0.466223	-0.86584	-0.650121	0.570286	0.231907	-0.39823	0.292326	-3.24533	-0.542266	-0.646589	0.364341	-0.766572	-0.0523129	-0.0689039	0.564741	-1.07174
587	1.94216	3.28614	1.8011	2.91872	1.92577	3.04786	1.94008	2.4057	1.8797	1.91631	1.99975	3.19556	1.73179	2.20156	1.57659	1.97889	1.86329	2.0162	2.24751	2.66444	1.91018	1.89842	2.42618	2.92639	2.13587	2.2886	2.16987	2.74193	1.71105	2.37602	1.49943	2.14062	2.61057	2.09924	2.41009	1.85039	1.8258	2.07334	3.04039	1.74578	2.57774	2.43889	2.94295	1.90537	2.3577	1.41865	1.53169	2.13721	3.00379
588	1.15074	2.57129	1.01812	2.30929	1.0223	2.29912	0.705434	1.57093	1.22632	0.866702	1.17914	2.88819	0.758653	1.47865	0.62148	1.23398	0.853964	1.11739	1.37931	2.1184	1.16645	0.702985	1.28834	1.95087	0.886826	1.01576	1.06788	2.0319	1.29607	1.70554	0.75933	1.72405	1.34592	2.01183	1.51056	0.60925	1.10341	0.997816	2.48052	0.616651	1.19212	1.66952	2.20212	1.1318	1.49693	0.778481	0.97473	1.43984	2.3185
589	0.173895	0.924852	-0.623709	0.259868	-0.52079	0.654176	-0.94416	-0.307535	0.366666	-0.236222	0.500827	1.81747	0.319244	0.774062	-0.088202	0.684912	-0.11038	0.118993	-0.394009	0.333683	-0.90702	-0.0316949	-0.594744	-0.19057	-1.007	1.20653	-0.186229	1.21139	0.631999	1.59682	-0.507912	0.23321	0.767632	-0.954906	-0.327377	-0.626137	-0.200131	-0.355413	0.628865	-0.413406	-0.103848	0.845397	0.868143	0.605305	0.564994	-0.540324	-0.460245	0.363787	1.11526
590	-1.36129	-0.580332	-3.44655	-0.882	-2.40278	-0.389392	-2.34114	-1.14019	-0.870757	-0.983372	-2.1055	-0.759419	-1.39172	-0.878493	-1.56517	-1.13458	-2.89825	-0.781683	-1.08944	0.419955	-1.43298	-0.856937	-0.972301	-0.564126	-1.45023	-0.728835	-1.18103	-0.558524	-3.85539	-0.246455	-2.29695	-1.39317	-1.07604	-0.36314	-1.43012	-1.54719	-1.03695	-0.959172	-0.412534	-1.25716	-1.00355	-1.37711	-0.835423	-1.43871	-1.16316	-1.33954	-1.50931	-1.34924	-0.680983
591	-0.274802	1.22333	-0.548331	0.500031	-0.18022	0.288275	-0.947979	0.0379047	-0.398482	-0.547008	-0.785369	0.508533	-0.31154	-0.234164	-1.16075	-0.257452	-0.402268	-0.310872	-0.558189	-0.101902	-0.528498	-0.881657	-1.43878	-0.0843434	-0.502622	-0.0533133	-0.488223	0.0284109	-0.216318	0.0999908	-0.995607	-0.178704	-0.25638	-0.465936	-0.334389	0.0149908	-0.892019	-2.66948	0.161847	-0.76229	-0.411502	-0.297443	0.20457	-0.600557	-0.437057	-0.43906	-0.638405	-0.473506	-0.313951
592	0.260173	0.689665	0.164513	1.36322	0.096602	0.935627	-0.328778	0.0416174	0.297561	-0.648498	-0.1064	0.905293	-0.126278	0.529197	0.0527511	0.384203	0.165547	0.192907	0.452679	0.914982	0.0959682	0.0854897	0.314896	0.944769	-0.166945	1.16441	0.00797319	2.04584	0.403305	0.563008	0.0232892	0.791765	1.11799	0.974693	-0.0337563	-0.267976	0.263993	0.0867414	1.77174	0.23166	0.509843	0.530453	1.80612	-0.0728979	0.485996	-0.200748	-0.2163	0.190891	1.63205
593	-1.53771	0.184375	-1.32299	0.148559	-1.19366	-0.210188	-1.22758	-0.521624	-0.907762	-0.743356	-2.08832	0.240467	-1.51921	-0.735645	-1.43583	-1.15982	-1.53907	-1.04788	-1.95938	-0.497168	-1.66023	-1.53418	-1.69257	-0.311279	-0.821776	-1.14379	-1.04175	-1.29082	-0.969619	-0.712648	-1.57757	-1.45679	-1.60314	-1.21999	-0.707893	-1.23348	-0.816086	-1.30109	1.00145	-1.27118	-0.664911	-0.47596	-0.160859	-1.29651	-0.701247	-3.15382	-1.42446	-0.414998	0.13469
594	-0.1418	-2.7092	-0.153152	-0.941234	-0.780353	-1.14189	-0.523444	-1.08765	-0.735358	-1.24385	-1.63557	-1.87717	-0.971937	-1.41469	-0.424156	-1.58503	-0.71364	-0.769673	0.0308757	-1.27629	-0.517275	-1.67923	-0.439076	-1.4943	-0.535027	-1.35739	-0.583277	-1.13523	-1.30115	-1.32117	-1.10996	-0.861809	-1.0379	-1.59407	-0.744077	-0.747289	-0.526716	-0.0250874	-1.48717	-0.896141	-1.42737	-0.840095	-1.54751	-0.896825	-0.871196	-1.05104	-0.753649	-0.606575	-0.988778
595	-0.465248	1.2726	0.108756	0.532475	-0.0331988	-0.423725	-0.139651	0.688963	-0.122341	-0.614124	-0.795961	-0.21774	-1.04253	-0.139726	-2.30144	0.455658	-0.44909	0.300769	-0.274535	0.439334	-0.758521	-0.495736	-0.184694	2.33479	0.199423	2.07459	0.337898	1.7938	0.028163	0.0362062	-0.867882	-0.122453	2.08097	0.959052	-2.31197	-0.415932	-0.784715	-0.463336	2.08963	0.152075	2.18013	-0.134624	1.06507	-2.00006	0.243406	-1.17423	-0.379875	-0.877475	-0.904611
596	-3.67656	-1.39016	-2.03772	-1.5544	-2.06962	-1.64915	-2.9202	-1.55678	-1.97192	-2.77521	-2.38697	-2.51599	-2.41117	-2.14151	-2.91506	-0.925328	-1.70812	-1.8376	-1.5582	-1.24383	-2.36348	-2.27929	-2.36027	-0.0889592	-3.28282	-1.4209	-1.79443	-1.19751	-2.06051	-2.30445	-3.15675	-1.72679	-0.92755	-1.19224	-2.25465	-2.57686	-2.92015	-2.45457	-0.518439	-2.40661	-1.66039	-1.85315	-0.813803	-2.51978	-2.27325	-2.34941	-1.42468	-2.10078	-1.79805
597	1.54078	-2.55272	1.91152	1.6466	1.59751	1.04444	1.36271	1.62932	1.12899	1.03117	1.64916	-1.0865	1.86629	-1.81837	0.949524	1.12476	1.2174	1.00155	1.53666	1.48959	1.99811	0.157587	1.90028	1.94846	2.3385	-0.177744	3.01781	0.264728	1.46461	1.02467	1.46348	1.39252	0.280998	0.663661	0.955783	1.37859	1.62419	1.70406	-0.269982	1.70147	0.962919	1.17927	-0.132386	0.0742874	0.318472	0.531914	1.4572	1.07139	-2.90512
598	-0.956324	1.33733	-1.17217	-0.108804	-0.58954	0.149044	-1.27868	-0.660287	-1.21343	-0.842078	-0.882087	-0.057025	-1.12748	-0.645495	-2.8388	-0.839457	-1.0605	-0.59502	-1.57675	-0.396448	-0.983867	-1.34849	-0.921723	-0.0968738	-1.0664	-1.69967	-0.636659	-0.301625	-0.429213	-0.186352	-2.82181	-0.906441	-0.455628	-0.706701	-2.02701	-2.75247	-3.19055	-1.47715	0.357166	-3.19676	-0.354601	-0.539587	-0.205397	-0.686673	-0.924809	-1.95113	-1.8538	-0.673658	-0.106514
599	-2.55756	0.80152	-2.81581	0.44881	-2.38234	0.907308	-2.34074	0.83642	0.862257	-2.09014	-3.06023	0.429706	-2.10029	0.505499	-2.39918	-0.130579	-3.25319	-0.40134	0.757589	0.765798	-2.66968	-2.8628	0.156513	1.1132	-3.00912	0.710158	1.31745	0.820073	-0.159616	-0.0788841	1.51643	0.0839443	0.530358	2.18896	-2.77381	-2.96009	-2.19487	-2.78115	1.14593	-2.04791	0.244992	1.20946	0.817849	-2.34363	0.189568	-3.33095	-2.55057	-2.08508	0.913556
600	-1.74053	-0.810228	-2.47227	-1.14155	-1.71497	-0.663985	-3.01208	-1.50334	-1.16394	-2.81178	-2.0256	-0.943462	-2.42735	-0.138662	-2.59415	-0.856097	-1.67391	-1.76085	-1.75977	-1.40916	-2.60393	-1.17369	-1.73193	-0.85501	-2.26594	-0.925303	-2.45476	-0.957149	-1.45442	-1.44706	-2.07007	-1.58839	-1.00551	-0.355004	-1.84079	-1.21736	-1.54034	-2.36368	-0.364585	-1.59829	-1.18414	-1.66196	-0.249434	-3.24508	-1.61944	-2.56477	-1.94315	-1.87235	-1.34771
601	-1.33343	0.0408792	-2.65391	-1.06662	-2.85037	0.615791	-2.73379	-0.748922	-1.38715	-3.11339	-3.48857	-1.27325	-2.49817	-1.10702	-2.61412	-2.45524	-1.62302	-1.53687	-3.08674	-1.10704	-0.95257	-1.09258	-2.92076	-1.40906	-0.840117	-0.845588	-1.6642	-0.762324	-1.53201	-1.16013	-1.43669	-1.16699	-0.916335	-1.51107	-1.14772	-1.97966	-2.94532	-2.65335	1.72106	-3.32736	-1.64481	-1.39002	-0.657948	-3.31539	-2.93915	-1.53666	-2.13643	-0.940681	-2.14927
602	-2.82377	0.107257	-1.80928	-1.03831	-2.14635	-0.665859	-2.55299	-1.74156	-1.24534	-1.41192	-1.82406	-0.696127	-1.56836	-0.200826	-2.13521	-0.630856	-1.8362	-1.74918	-2.31877	-0.549555	-2.22891	-0.226099	-1.80129	-0.777429	-2.80056	-0.422039	-1.90932	-0.20101	-1.09131	-1.32428	-1.19876	-1.1664	-0.1446	0.0422115	-2.62985	-2.67983	-1.62796	-2.93349	-0.0352468	-2.48401	-1.18005	-0.946956	-0.650661	-1.40895	-2.63599	-2.76346	-2.9323	-1.15707	-0.620573
603	-3.15681	-0.0143766	-1.95609	-0.881992	-1.64219	-0.507311	-2.17133	-0.952783	-2.89277	-2.64276	-1.49016	-0.303669	-2.90898	-0.686606	-3.02846	-0.891025	-2.90418	-2.5613	-1.53889	-0.864934	-1.0843	-1.98145	-1.22282	0.139387	-2.97841	-0.386537	-1.38816	-0.692463	-0.971622	-1.08284	-2.82228	-1.12825	-0.661286	0.372468	-0.990576	-2.53192	-2.41997	-1.41074	0.304116	-3.37718	-1.26606	-0.969231	-0.242987	-3.09567	-2.20417	-2.6118	-3.18144	-1.15	-0.610808
604	-3.31575	0.298465	-1.20947	0.0490961	-1.7938	-0.175124	-2.58997	-0.144784	-0.374903	-0.523319	-2.31622	-0.180991	-1.51845	-3.15344	-2.14026	-2.40674	-0.730167	-1.15005	-3.46805	-0.144155	-2.79567	-3.32118	-2.57577	-0.513415	-2.55615	-1.98556	-2.99687	-0.857996	-0.390167	0.0901699	-2.69133	-2.97552	-0.0184622	-0.686317	-0.129615	-1.79153	-1.86166	-1.67445	-0.0286884	-3.05556	0.0358229	-0.388023	-0.340696	-2.95373	-0.323929	-2.05751	-2.31511	-0.258421	-0.0242186
605	-0.225813	-2.08556	-0.608617	-1.2049	-0.192446	-1.66414	-0.807136	-1.18953	-0.563392	-1.69322	-2.50168	-3.33122	-0.794151	-1.68271	-0.214344	-1.35985	-0.878114	-0.781816	-0.76188	-0.826149	-0.165525	-1.54595	-0.47547	-1.15298	-0.486774	-1.22505	-0.597657	-1.17485	-0.511198	-0.88075	-0.925359	-0.767724	-0.918426	-1.55706	-3.08295	-1.11758	-0.628891	-0.860358	-1.93072	-0.691041	-1.66189	-0.78139	-1.39326	-0.860811	-1.01038	-0.411157	-0.875636	-0.710269	-1.15535
606	-0.698543	0.690305	-0.61297	0.155598	-0.640646	0.57247	-0.512543	-0.879631	-0.130185	-0.0661573	-0.580232	0.64516	-0.691793	0.238708	-0.197629	-0.0218692	0.0731125	-0.49716	-0.323111	-0.419469	-0.58217	-0.304691	-0.624371	0.359896	-0.471863	0.500931	-0.410462	1.11332	-0.225522	-0.273431	-0.482171	-0.0760603	0.087657	0.329477	-0.51249	-0.636097	-0.698813	-0.574867	0.644058	-0.652702	0.241984	-0.244906	0.48894	-0.181417	0.273148	-0.58494	-0.874436	-0.0568223	1.3469
607	-1.97813	-0.422072	-2.16164	-1.45812	-1.9692	-1.39052	-2.24074	-2.24832	-2.25918	-1.37952	-2.07672	-1.41477	-2.70164	-1.95616	-1.74946	-1.46425	-2.37678	-1.69659	-2.27806	-1.7928	-1.79401	-2.18237	-1.90236	-1.97888	-2.0305	-0.466629	-2.6359	-0.613325	-2.0647	-1.80342	-1.95245	-1.54406	-1.16259	-1.69263	-2.45417	-2.25998	-2.95142	-2.00114	-1.40048	-2.91087	-1.44955	-1.80481	-0.765415	-2.53553	-1.39066	-2.90569	-2.18312	-2.40198	-0.796777
608	2.60234	3.47018	2.62257	4.19443	1.1866	4.86886	3.34496	3.70964	3.76435	2.68717	2.9722	4.24741	2.6821	3.96583	3.53622	3.71489	1.24112	2.84308	3.14583	2.09623	2.94851	1.2541	3.30511	2.60783	4.15047	4.97653	3.16269	4.85599	1.69514	4.121	2.61465	3.99145	3.84492	0.905564	3.31844	2.68253	-0.452019	1.58806	4.00042	3.16448	3.67464	3.49807	4.45384	2.38423	3.45101	3.08886	3.15428	2.05162	3.0969
609	5.13714	2.84614	5.1604	3.36238	5.05177	3.03969	4.85966	4.02851	4.61794	2.91493	4.92187	2.32356	4.57291	4.18338	3.85663	5.32641	4.83516	4.88785	5.39789	4.83551	5.2487	3.06401	5.67542	5.21687	4.69848	3.86133	4.64345	4.51865	5.04644	5.05253	4.23506	4.88875	4.7999	5.45197	3.85869	4.82794	4.6653	5.36317	5.53276	4.73958	3.87556	5.15148	4.2103	4.22574	4.11511	4.12918	4.23403	4.88691	3.24202
610	0.74961	-0.829349	0.792927	-0.950306	0.562665	0.355626	-0.196732	0.643794	0.663328	-2.27637	0.377872	-2.19001	0.0663404	0.217863	0.0376925	0.31183	0.513156	-2.61966	0.872252	0.368649	0.435554	-0.754142	0.780521	0.619284	0.665362	0.422946	0.407601	0.469631	0.700029	0.567639	0.214417	0.665483	0.289968	1.02201	0.499271	-0.0158253	0.589638	0.376738	0.600483	0.154116	-2.34285	0.406174	0.561464	0.288238	-2.85268	0.271214	0.190838	0.395918	0.264679
611	-0.791939	-0.397408	-3.38237	0.323439	-0.917017	0.361309	-2.47764	-0.689407	-2.62982	-0.564734	-3.35964	0.119868	-2.40649	-0.344008	-1.96667	0.347195	-0.778531	-0.46666	-0.833546	0.121544	-2.34155	-0.586166	-0.813324	-0.0570855	-0.675064	-0.163352	-0.516549	0.092556	-0.400402	-0.112145	-2.31224	-0.735087	-1.38875	-0.512645	-0.715952	-0.805934	-0.378009	-0.397644	1.25431	-0.968537	-1.39016	0.0513601	-0.467434	-0.456167	0.0149517	-2.23058	-2.55375	0.164803	0.702521
612	-2.58081	0.45796	-0.522908	0.268193	-1.10463	0.220155	-2.49462	0.752191	-1.50178	-2.68211	-2.59265	0.505402	1.51146	1.48631	-2.32495	0.211771	-0.537398	0.481925	-1.66608	0.00293875	-2.73929	-0.271451	-0.907495	-0.151344	-0.347636	0.00261688	-0.386878	-0.300847	0.0391083	0.0348454	0.042604	0.897223	-0.639111	-0.200265	-0.856288	-1.39094	-1.97638	-2.29229	0.307094	-0.522779	-0.698984	-0.35795	-0.117582	-0.383347	-0.556825	-2.34861	-2.23556	-2.47092	-0.277298
613	5.09936	6.41538	4.86958	5.917	4.86661	6.13959	4.83961	5.5027	4.83485	4.65503	4.69048	5.37877	4.54848	5.31398	4.36161	5.49486	4.86625	5.49393	5.59128	6.20432	4.72723	4.74575	5.68691	6.43426	4.85901	5.72855	5.27696	6.00212	5.02409	5.78484	4.34511	5.27828	5.9689	5.33562	5.08382	4.69742	4.55391	5.27809	6.16304	4.74072	4.99533	5.09476	5.76399	4.87269	5.29638	4.19257	4.63829	5.33397	5.67799
614	0.428362	0.424289	0.490917	1.33951	0.518974	1.20312	0.263017	0.660562	0.792706	0.628921	0.532576	1.17445	0.147794	1.40903	0.14096	1.74067	0.541038	0.828848	0.336957	1.08732	0.213434	0.586826	0.486701	1.16112	0.439717	1.39414	0.570277	1.13438	0.902672	0.893797	0.332032	0.835327	1.10184	1.10539	0.371272	0.26671	0.129998	0.310548	1.9023	0.477615	1.05221	0.83616	1.37622	0.452165	0.525165	-0.445664	0.25388	0.737375	1.01009
615	0.384697	1.19087	0.263834	1.95296	0.598613	1.05976	0.158021	1.75219	0.674618	0.272176	0.103559	1.60094	0.32553	0.354277	0.286038	0.269176	0.592175	0.520721	0.287941	1.48515	0.443033	0.639169	0.959656	1.41987	0.5761	-0.274611	0.596089	1.06334	0.286378	1.83417	0.123774	0.58535	1.01192	0.386939	1.0421	0.0986595	0.557872	0.597959	1.38113	0.204908	0.478502	0.826237	1.27191	-0.363473	0.850265	0.0556993	0.352178	1.04834	1.48273
616	7.86711	4.47399	7.55773	6.62154	7.44522	6.45406	6.97236	6.62902	7.0522	6.138	7.34263	5.83355	7.11432	6.33295	6.98558	6.78207	7.05121	6.90783	7.41537	7.06997	7.667	6.2572	7.30827	6.89228	7.71705	6.59136	7.65029	7.26815	7.19341	7.45647	7.09732	7.83532	6.96124	6.88257	6.34874	6.87718	7.18027	7.39076	6.2352	6.81741	6.08339	7.24941	5.9255	6.63849	6.16929	6.94766	7.08809	7.35229	7.13163
617	0.269547	0.547481	-0.0421739	1.26423	0.0976949	1.27299	-0.304561	0.0297041	-0.183888	-0.468637	0.198234	0.804767	-0.398997	0.343779	-0.867771	0.667248	0.130306	0.0745573	0.239246	0.978746	-0.0211525	-0.388038	0.38459	1.37859	0.23293	0.880887	0.125862	1.75774	0.238756	0.615634	-0.552663	0.550582	0.412414	0.956499	0.239997	-0.506212	-0.178073	0.00299454	1.86483	-0.719315	-0.00760269	0.415788	1.31776	0.0131216	0.128605	-0.42619	-0.0083437	0.307895	1.33596
618	0.532591	1.44288	0.430558	1.56611	0.638998	1.18341	0.295817	0.947229	0.720447	0.467177	1.25672	1.77064	0.269274	1.03774	0.0669303	1.15064	0.690261	1.02925	0.673431	1.0908	0.423982	0.955505	0.34716	1.59818	0.500343	1.40289	0.905879	1.6687	1.20464	0.997799	0.456958	0.902731	1.59632	1.43524	0.528897	0.0696545	0.298757	0.515605	1.50678	0.532165	0.826144	1.17235	1.80805	0.878682	1.10322	-0.215221	0.216116	0.856267	2.01064
619	1.70362	2.47673	1.81187	3.21303	1.68702	2.99424	2.03169	2.61777	1.98506	2.46277	2.11717	3.20102	1.38923	2.68254	1.38838	2.27944	1.77032	1.97939	2.98242	3.53627	1.65905	2.15121	2.61798	3.07425	1.74413	2.36828	1.97344	2.56786	1.96829	2.58168	1.73198	2.55383	2.81769	2.2175	2.65598	2.01979	1.65708	2.10489	3.09359	1.72257	2.34208	2.51783	2.49725	1.97938	2.49286	0.984437	1.34046	1.92787	2.73709
620	0.228573	-2.24927	-0.664464	-2.65445	-0.174676	-1.09749	-0.915518	-2.8038	-0.833755	-2.46492	-1.14438	-0.617009	0.0661049	-2.09652	-0.891772	-2.45931	-3.00232	-3.17172	-0.0797353	0.984972	-0.128344	-2.71209	0.203409	-1.345	-2.101	-3.16327	-0.977692	-2.75488	-1.13974	-0.469801	-0.868742	-0.155695	-0.618814	-0.211237	-3.86692	-0.464741	0.193736	0.347961	-0.555353	-0.298979	-1.8684	-2.45293	-2.21799	-0.570969	-0.0664358	-0.568404	-0.474953	-2.01572	-2.48701
621	-2.2155	0.063447	-3.06166	-0.294849	-2.33601	-0.257165	-2.75521	-2.32045	-0.493156	-1.73677	-0.755923	-1.20156	0.870429	-0.0878801	-1.88157	-0.0936294	-0.0475464	-0.322752	-0.198727	-0.200557	-2.4197	-2.8242	-2.43349	-0.395729	-1.65288	0.03543	-2.98044	0.84222	0.291249	0.0601349	-2.92742	-0.625667	-0.262959	-0.109262	-3.27692	-2.39924	-1.91629	-2.70914	0.837072	-3.5153	-0.682726	-2.4645	0.452015	-0.150338	-0.27756	-0.262375	-0.157939	-3.35606	0.274656
622	-0.627981	0.272493	-0.728471	0.471891	-0.310793	0.319917	-0.441938	0.232266	-0.230923	-0.377992	-0.366588	0.303392	-0.71106	0.355461	-0.986343	0.201231	-0.599638	-0.450244	0.170878	0.621798	-0.665654	-0.561923	0.025485	0.630111	-0.321289	0.404117	-0.308227	0.411504	-0.441082	0.150466	-0.718345	-0.291764	0.363938	-0.182629	-0.136289	-0.445523	-0.445596	-0.323646	0.606856	-0.216584	0.0361204	-0.225937	0.398522	-0.384896	0.139538	-1.32919	-0.742604	-0.0892024	0.818056
623	-1.19353	0.313947	-3.60685	-0.0890293	-0.311434	0.159372	-0.893539	-0.135965	-0.560771	-0.2778	-1.15067	0.463028	-0.442945	-1.36699	-2.7316	-0.652206	-1.39479	-0.968898	-3.28603	-0.45088	-1.20509	-2.58279	-0.696722	-0.322257	-1.62528	-0.745949	-1.49098	-0.889505	-0.250706	-0.379338	-1.99056	-1.06129	-1.00175	-0.467647	-0.407831	-1.75251	-1.06148	-2.96271	0.102945	-2.5664	-0.198662	-0.417642	-0.191988	-2.82758	-0.882843	-0.556888	-0.506015	-1.01229	-0.602022
624	3.14726	3.7278	3.49746	4.02842	3.31764	4.16691	2.62417	3.23446	2.54694	2.39039	2.37691	3.79499	2.65412	3.51303	1.99881	4.15602	3.15392	3.5199	3.34954	4.03789	2.72734	2.62611	3.29444	4.05346	3.30415	3.98904	3.35452	4.96626	3.22801	3.75433	2.13607	3.11185	3.66648	3.93628	2.76019	2.69006	3.02981	2.82047	4.52663	2.46771	3.12919	2.99881	4.61248	3.07112	3.60169	1.67332	1.97571	3.57979	4.2602
625	1.92274	3.11291	1.91486	3.12681	2.03655	3.26497	1.95189	2.70481	1.10823	0.913331	0.462294	2.01987	1.9226	1.47196	1.20835	1.82205	1.72422	2.2443	2.08112	3.12085	1.8956	1.46923	2.61128	3.20734	2.12201	2.02206	1.82754	2.87321	1.99891	3.81612	1.48952	2.37844	3.33935	3.44618	3.04233	1.71778	1.7314	1.87439	3.19052	1.86146	2.36205	1.87197	3.04811	1.56995	2.41273	1.24207	1.62941	2.65167	3.51129
626	-2.13635	0.137648	-1.99881	-0.965095	-2.31938	-0.738216	-2.74581	-1.31674	-1.58853	-1.96974	-1.8163	-0.52418	-2.59449	-1.28529	-1.71045	-2.05502	-1.69317	-1.81138	-2.16061	-1.1942	-2.14594	-1.94287	-2.43125	-1.15251	-2.34386	-1.68475	-3.23233	-1.54352	-1.40668	-1.32246	-1.70613	-1.72514	-2.24044	-1.68779	-1.77822	-2.25703	-2.91505	-2.64536	-1.41919	-2.60213	-1.9524	-1.37611	-1.37543	-2.39891	-1.60949	-2.15698	-2.69739	-1.77821	-1.41317
627	-0.856718	0.709893	0.0269704	0.43801	-2.57995	0.137381	-0.799013	-0.0705299	-0.488776	-0.701688	-0.167409	0.180563	-1.12001	-0.180019	-0.824152	-0.289693	-0.276106	-0.429942	-0.462348	0.0983434	-0.408092	-0.231586	-0.233186	0.250009	-0.557974	-0.0561476	-0.266817	0.105685	-0.301051	0.00694084	-1.82036	-0.506308	0.381392	-0.0785418	-0.0328398	-0.80553	-0.802889	-0.276356	0.529658	-0.720632	-0.0472164	-0.22285	0.244246	-0.259344	0.164385	-1.20496	-0.0205183	-0.374181	0.239475
628	-1.79141	0.758591	-2.43805	-0.603083	-2.2439	-0.659778	-2.96775	-1.02298	-2.34617	-2.36248	-1.783	0.160444	-1.50102	-1.83055	-1.90807	-3.02136	-1.61152	-1.65106	-2.95274	-0.994207	-2.18222	-3.57889	-1.90045	-0.99821	-1.75973	-3.13151	-1.68434	-1.4747	-1.67368	-2.12754	-3.2509	-1.926	-1.76817	-2.09012	-0.811938	-1.87968	-2.50427	-2.52646	-1.94907	-2.73094	-1.32653	-3.36597	-0.353407	-2.42896	-0.81892	-1.62984	-2.35982	-2.78971	-0.60959
629	3.57088	4.33569	3.38333	4.58025	3.60392	4.15662	3.29057	4.1264	3.46619	3.20631	3.73109	4.36288	3.3095	3.75025	2.90541	4.10951	3.42935	3.72508	3.97977	4.75921	3.47534	3.52994	3.91002	5.13032	3.25961	3.89089	3.58391	4.27065	3.98404	4.1835	3.21569	4.02498	4.15868	4.16093	3.53931	2.95053	3.53743	3.27104	4.95187	3.1257	3.95676	3.89017	4.29924	3.74034	3.93169	2.35348	2.98992	3.87963	4.63297
630	0.182726	-3.21023	0.421895	-0.401321	0.549274	-0.872109	-0.428834	-0.56865	0.686293	-0.288995	0.543141	-0.461539	-0.259567	-0.195133	0.0777822	0.190244	0.0619898	-0.42934	0.288272	-0.0989165	0.352232	-1.26058	0.340972	0.015389	0.527829	-0.681144	0.404679	-0.351288	0.589487	0.00590611	-0.101484	0.132895	-0.658987	-0.340837	-0.357575	-0.265179	0.453071	0.479678	-0.194152	-0.0532351	-2.72556	0.0808964	-0.885426	-0.27382	-0.347566	-0.0391874	-0.161448	0.0435462	-0.420922
631	4.1492	2.87082	4.37281	2.56458	4.7974	2.06136	3.69478	3.03792	4.20738	2.30324	3.25939	2.66642	3.71573	2.66843	2.21623	3.57632	3.59024	4.18272	4.12367	3.15485	3.76944	2.58643	4.03439	4.17339	4.83455	4.7895	4.37093	3.00359	4.02999	3.48917	3.50848	4.47752	3.49776	3.03271	1.98101	3.62692	3.86656	4.54025	3.35075	3.8496	3.13491	3.36192	3.58655	3.18602	2.47533	3.12066	3.26461	3.77781	2.29792
632	-0.231571	-0.0841188	-0.653025	0.114907	-3.01513	0.117455	-2.81603	-0.181596	-0.132641	0.0795574	-2.55141	-0.379386	-1.48407	-0.123046	-0.0193076	-0.147766	-0.345927	-0.141257	-0.79803	0.0791411	-0.819063	-0.208912	-0.184577	1.02248	-0.228065	0.0619555	-0.565151	0.603927	-0.397357	0.785686	-0.00976419	-0.0175428	0.311174	0.274272	-0.0535126	0.0089159	-2.0429	-0.877297	0.477811	-2.1229	-0.448709	-0.0244055	0.539232	-0.674299	-1.09507	-0.0344973	0.32451	0.181304	0.126437
633	-0.141922	-2.76939	-0.12792	-0.92114	0.197238	-1.19983	-0.651978	-1.04816	-0.571861	-1.07432	-0.90319	-2.34296	-0.522996	-1.03901	-0.629027	-0.80723	-0.391913	-0.962008	-0.552897	-0.153124	-0.459461	-1.73871	-0.133733	-0.575779	-0.402957	-0.521025	-0.196951	-0.656451	-0.923903	-1.07773	-0.689471	-0.43171	-1.68872	-1.19468	-1.01982	-0.662512	-0.360015	-0.443398	-1.55876	-1.14333	-1.36265	-0.455086	-1.61664	-0.734654	-1.04836	-0.581299	-0.64887	0.242426	-1.61269
634	-2.12103	1.79775	-2.36854	-0.238602	0.566341	-0.863668	-2.86928	-2.31208	-3.13887	-0.656918	-2.07908	0.784744	-2.71537	-1.36108	-1.86764	-1.28887	-1.52763	-0.674054	-2.39036	-0.452201	-2.65904	-2.56865	-0.78812	-1.03294	-2.20652	-0.785993	-2.38408	-1.36066	-2.12915	-0.785357	-1.64273	-1.24791	-0.856006	-0.120539	-2.24758	-2.96478	-3.02704	-1.97931	-0.882318	-2.89309	-0.963072	-0.939869	-1.32067	-0.934597	-0.418683	-2.21471	-2.56548	-1.68056	-1.7004
635	-0.247519	0.399955	-2.11413	-0.535391	-2.07778	-0.315873	-2.74732	-0.47865	-0.440612	-0.525125	-1.41922	-0.344002	-3.09927	0.160772	-1.18937	0.229038	-0.43976	-1.75286	-1.01744	-0.422993	-2.22821	-1.80673	-2.36753	-0.28683	-0.69124	-0.239891	-2.48641	-0.444923	-2.93122	-0.692927	-2.57147	-0.928931	-2.86583	-3.27093	-0.646653	-4.26129	-0.141648	-2.89768	-1.11901	-3.15186	-2.02488	-0.870033	-0.6148	-2.5128	-2.40789	-2.53264	-2.37972	-0.573266	-0.841323
636	-2.74827	1.19029	0.788781	2.74323	-0.603968	0.706473	0.833694	1.639	0.838651	1.49784	2.45132	-0.498267	-0.621745	-1.02521	-1.40818	0.55087	-1.25357	-0.366477	1.12945	0.393964	-3.79948	-0.0757127	-0.368837	1.77728	0.323689	0.916113	2.03872	3.18524	-0.295747	0.480928	0.0493855	1.56093	3.06824	-0.0632401	-0.027133	0.993319	-0.637966	-0.157103	2.31432	0.124713	1.82278	-0.151414	2.67716	-0.808363	1.27459	-2.16856	-2.66913	-0.046206	1.78169
637	3.13497	4.07734	2.8175	3.81261	2.96718	4.03658	2.32879	2.79623	3.15138	2.31057	2.83238	3.61242	2.71603	3.59412	2.85148	3.58144	2.97764	2.88458	3.37887	3.90983	3.07794	3.05317	3.05032	3.88975	2.9851	4.05329	3.05191	4.57373	3.24161	3.50688	2.70626	3.41552	3.7374	3.74888	2.64684	2.27406	2.93018	2.72117	4.51538	2.65601	3.22897	3.28281	4.21353	3.00517	3.30176	2.50019	2.67431	3.21866	4.43124
638	1.26644	0.636545	1.34961	0.519209	1.64002	0.515849	0.811213	0.390162	0.54667	0.0180817	0.575275	-0.296439	0.881938	0.113963	0.630081	0.524228	0.841696	0.885574	1.2156	1.31757	1.04907	0.367756	1.34381	1.23323	1.25473	-0.192893	1.51858	-0.101728	1.36643	1.02982	0.797433	1.18689	0.503294	0.790658	0.594139	0.534163	1.24239	0.963727	-0.823511	0.412858	0.136161	1.01648	-0.531374	0.375979	0.0455847	0.251526	0.587844	1.03643	-0.357903
639	-0.261923	-0.104576	-0.447879	0.566834	-0.348906	0.686643	-1.01954	-0.242135	-0.152723	-1.14472	-0.266937	-0.210908	-0.488683	0.346925	-0.791478	0.636267	-0.331948	-0.356022	0.175083	0.615633	-0.361043	0.0777612	-0.314847	0.708429	-0.493608	0.912604	-0.272282	1.40154	0.126774	0.0978613	-0.749103	0.193353	0.767369	0.865958	-0.366344	-0.995018	-0.519246	-0.741406	1.71112	-0.352427	-0.0680666	-0.165544	0.882428	-0.362262	-0.362924	-1.01904	-1.05252	-0.289127	0.925509
640	-0.507424	0.497551	-1.04794	-0.0261393	-0.693274	0.22677	-1.19379	-0.502071	-0.721272	-1.1128	-0.612226	1.17215	-0.747677	-0.420248	-0.621291	-0.338065	-0.559872	-1.05997	-0.64425	-0.124568	-0.667058	-0.596769	-0.746852	-0.0621305	-0.389767	0.175881	-0.515049	0.290719	-0.19781	-0.234733	-1.11402	-0.075304	-0.000232697	-0.379852	-0.360306	-1.57176	-0.618909	-0.893414	0.710031	-0.837664	0.131053	0.30184	0.377872	-0.673652	-0.457925	-1.40651	-1.35194	-0.732434	0.407123
641	2.74042	-0.49101	2.21795	2.8741	2.34964	1.90571	2.60625	2.22139	2.10298	2.08996	2.75866	-0.0301065	2.36491	0.941011	1.96323	1.32831	2.29948	1.48659	2.89788	2.65146	1.80461	0.226277	3.36051	1.76738	1.53606	1.23717	3.3827	1.35909	2.4657	2.00455	2.50243	2.96735	1.62066	0.995112	1.99119	2.67395	2.41108	3.27364	0.858231	2.14284	1.35936	2.46679	0.974956	1.742	2.08587	1.69872	2.10849	1.49244	1.89232
642	0.326368	1.02049	1.10481	1.61952	1.04704	1.2037	0.436425	1.25935	0.958252	0.806939	1.15481	1.66247	0.825079	1.79579	0.324662	1.76023	0.97638	1.61558	1.34991	1.91812	0.674692	1.24354	1.14332	2.62165	0.733644	1.58247	0.884369	2.07536	1.28649	1.39337	0.493656	0.907867	2.17987	1.51592	0.87394	0.407845	0.912733	1.24918	3.06743	0.914763	1.16653	0.937261	1.89396	1.21774	1.22925	0.337534	0.637263	1.06659	1.99333
643	-0.0487466	-3.23895	-0.473926	-0.814959	0.11743	-0.518368	-0.25993	-0.742846	-0.696351	-0.892571	-2.52089	-2.83275	0.375688	-1.08664	-2.7004	-3.54063	-0.352662	-0.203414	-0.189077	-0.479614	-0.161695	-3.71588	-0.0438719	-0.807139	-1.00779	-0.790084	-0.008883	-3.52699	-0.100079	-0.778419	-0.431844	-0.172264	-2.80582	-0.611954	-4.06977	-3.3283	0.311507	-0.317431	-2.54451	-0.281615	-1.47365	-0.311303	-1.6588	-0.254274	-1.34467	-0.310573	-0.0460377	-0.41912	-2.03925
644	-0.727554	-2.94983	-0.59445	-2.15922	-1.01417	-2.04847	-1.66592	-2.41677	-0.986504	-2.83714	-1.69224	-2.41211	-1.07804	-2.79707	-1.49268	-2.04176	-1.43599	-0.910822	-1.17335	-1.72166	-1.13589	-2.23769	-1.22998	-1.19862	-1.20778	-1.81481	-1.06519	-1.37616	-0.815355	-1.41087	-1.50886	-1.48784	-1.5625	-1.2184	-2.41317	-1.89272	-1.13769	-1.03973	-1.37779	-1.69866	-0.631529	-1.9301	-1.88338	-1.32732	-2.02522	-1.03467	-1.22279	-1.50326	-1.52993
645	-0.440673	2.58091	-1.49601	0.114387	-1.14457	0.107596	-2.93922	-0.627383	-1.29648	-1.643	-1.65476	0.126315	-1.01396	-3.07335	-1.93916	-2.19382	-1.1966	-0.555119	-2.82064	-0.378051	-1.89262	-1.79676	-2.24282	0.544853	-2.22968	-2.8913	-1.16404	-0.540751	-1.277	-1.1313	-2.55791	-2.04527	-1.85191	-1.64523	-0.0841436	-2.4524	-1.56335	-1.65121	0.617096	-2.10354	-2.17368	-3.31225	-0.939778	-0.722914	0.46546	-2.62626	-1.49192	-1.12623	0.658527
646	0.333768	1.17408	0.237384	2.15056	0.700675	1.88556	-2.05436	1.85249	-0.232275	-0.754573	-1.02574	0.400098	-0.215119	-0.453621	-2.67947	0.081181	0.312523	0.359819	-0.346166	0.915683	-0.474491	-0.211043	-0.337136	1.29199	-0.129021	-0.575645	0.470571	1.1288	0.520563	0.717058	-0.35651	0.765628	0.561448	1.75943	0.0097847	-2.18482	-2.45362	-0.798736	2.45715	-3.0709	-0.39654	-1.76535	1.67417	-1.00125	-0.122402	-2.8776	-2.74161	-0.0434108	1.02468
647	0.785169	1.92802	0.97942	1.67066	0.618944	1.93056	0.742329	1.3188	0.798413	0.711346	0.972736	1.45207	0.45391	0.982455	0.422275	1.3645	0.532416	0.630337	1.4325	1.72332	0.414667	0.602309	1.22977	1.41179	0.665866	1.22901	0.781724	1.70043	0.945849	1.36157	0.435239	1.25011	1.50966	1.95028	1.25358	0.817963	0.270355	0.778002	2.5432	0.540265	0.925117	1.01666	1.90353	0.430851	1.31174	0.265164	0.604529	0.950108	1.86711
648	0.711445	1.66609	0.576201	1.62069	0.524892	1.76989	0.567142	1.31145	0.942543	0.806177	0.840659	1.74089	0.482585	1.51701	0.431756	1.11071	0.551333	0.4455	1.41683	1.53167	0.567577	0.883752	1.31218	1.78696	0.687451	1.48795	0.884328	1.55945	0.605524	1.34732	0.434968	1.1562	1.29367	1.77333	0.975904	0.692121	0.795918	0.940785	1.92709	0.47755	1.12716	1.1614	1.56553	0.38825	1.07058	0.486007	0.629167	0.622052	1.35022
649	-0.219071	0.0754108	-0.805444	-0.452152	-0.557093	-0.645669	-1.01329	-1.03808	-0.675388	-3.08713	-3.76322	-0.447453	-3.35681	-0.509961	-2.94184	-0.862574	-1.99492	-0.915654	-2.68912	-0.352433	-2.48492	-2.24565	-2.97332	-0.459871	-2.65918	-0.852081	-0.430436	-0.702961	-1.04589	-0.948404	-2.73366	-0.859381	-0.660042	-0.474461	-1.92253	-2.2885	-2.74636	-2.99725	-0.728951	-2.53586	-2.31194	-1.02035	-0.780753	-2.93852	-1.04349	-2.53966	-2.7921	-0.690827	-0.624362
650	-1.67496	-0.591521	-2.47268	-0.663177	-0.979078	-0.969804	-3.5269	-1.0358	-2.20396	-2.74011	-2.60698	-0.107471	-1.66586	-1.40842	-3.2604	-1.6986	-1.16241	-1.50797	-2.58766	-1.66084	-1.94794	-2.13855	-2.38381	-0.893518	-1.21391	-1.92984	-1.39632	-1.1348	-1.33127	-1.31619	-2.9734	-1.9005	-3.04258	-1.2345	-1.11759	-2.44711	-1.25152	-3.09201	-0.846431	-2.30086	-1.67681	-2.41124	-1.13421	-1.41804	-1.1099	-3.05162	-2.08239	-2.80806	-0.981721
651	0.316995	1.38145	0.320632	1.01866	0.23219	1.04856	0.179846	0.442224	0.560932	0.208954	0.130764	1.2493	-0.0505257	0.565533	-0.302809	0.907567	0.0709047	0.533864	0.795228	1.13536	0.174159	0.0123382	0.60481	1.57392	0.280507	1.29046	0.370506	1.53437	0.460093	0.629111	-0.0100951	0.730536	1.30541	1.14095	0.315503	0.117384	0.163787	0.31855	2.00864	0.312531	0.831295	0.272551	1.50139	0.487869	1.04112	-0.0917988	0.0902653	0.651382	1.50223
652	2.78013	4.17187	2.56145	3.60666	3.27757	3.42348	2.18191	2.92286	2.83478	2.46732	2.38942	4.41197	2.40757	3.70537	2.15591	3.13943	2.71525	3.68577	2.73843	3.0924	2.47179	2.85451	2.53703	3.05975	2.74546	3.18639	2.78854	3.60066	3.65947	3.39791	2.37872	3.27176	3.48672	2.37833	2.96761	2.38841	3.18574	2.99835	3.68954	2.88375	3.11752	3.27826	3.68937	3.31373	3.2288	1.92825	2.77609	3.72835	3.71682
653	-2.52885	-3.24743	-3.15326	-0.371247	-3.14519	-0.261202	-3.25637	-3.95892	-2.48606	-2.33752	-1.21876	-0.979074	-2.20843	-2.26341	-2.50252	-0.424052	-2.1306	-0.831388	-0.39112	-0.226994	-2.68269	-2.47452	-2.91264	-0.433892	-0.541964	-0.049387	-2.06684	0.060029	-1.55465	-0.491109	-2.74112	-0.37398	-0.306094	-0.148399	-2.33024	-3.09528	-1.77153	-0.543563	-0.138714	-1.81714	-0.585158	-2.71561	-0.0936165	-3.55758	-0.679312	-2.77443	-2.68013	-0.826469	-0.184036
654	2.29698	2.8772	1.81729	2.74243	1.93404	2.97642	1.59897	2.40037	2.19903	1.86385	2.73768	2.74158	1.73132	2.91734	1.67776	2.57025	1.77829	2.33534	2.09774	2.59712	1.88715	2.92103	1.9813	2.68355	1.88377	2.7171	2.00905	2.62981	2.21054	2.50066	1.63517	2.15901	2.47678	3.00924	2.37945	1.48182	1.96628	1.71604	2.67516	1.51899	2.08531	2.10772	2.66793	2.73946	2.30398	1.75794	1.74507	1.94708	2.74459
655	-1.56491	-0.453633	-1.64714	-0.875733	-2.52914	-1.04897	-2.10598	-1.32298	-2.08518	-2.86529	-0.987097	-1.48405	-1.65852	-0.941144	-2.94752	-0.641267	-1.31071	-1.3997	-1.14517	-1.05096	-1.38798	-1.25192	-1.38414	-0.929686	-2.05396	-0.107114	-0.731263	-0.0329762	-1.38286	-1.28371	-1.14845	-1.35453	-0.461718	-0.622424	-0.95929	-3.62724	-1.16402	-2.38614	-0.122492	-2.24938	-0.99722	-0.834276	-0.314716	-1.88969	-1.07887	-3.27522	-1.20686	-1.25594	-0.388989
656	2.99332	3.66645	2.9738	4.26106	3.06673	3.88098	2.99466	3.75094	3.16337	2.91622	3.09217	3.71294	2.71955	3.39223	2.42569	3.44288	2.93169	3.30522	3.64429	4.07213	2.90971	3.03052	3.60995	4.33993	3.12823	3.61131	3.32392	3.79963	3.36601	3.79141	2.79498	3.5169	4.019	3.22222	3.12638	2.85814	2.83459	3.37075	4.16549	2.83817	3.40783	3.38815	3.85174	3.01116	3.34497	2.16455	2.62687	3.18191	3.97428
657	-1.00466	-0.193456	-2.84731	-0.755173	-1.66631	-0.78374	-2.92303	-0.794248	-1.74654	-2.04317	-0.784965	-1.37076	-0.928102	-0.69374	-1.77352	-2.79253	-2.11382	-1.13252	-2.81294	-0.70196	-0.935265	-0.0743804	-2.56002	-0.399575	-1.31101	-0.519218	-2.41285	-0.561709	-0.768771	-0.706037	-1.15577	-0.603177	-0.317234	-0.347573	-1.28341	-2.6493	-1.76503	-2.07565	-1.07377	-2.62589	-1.17481	-1.1747	-0.735913	-0.532936	-1.05648	-2.34857	-2.32586	-2.87298	-0.917257
658	0.488456	0.494271	0.289076	1.15799	0.648126	0.786141	0.158028	1.05123	0.0680037	0.0806589	-0.0556078	0.795385	0.0677729	0.204197	0.107058	0.203094	0.215619	0.368499	0.144057	0.745599	0.357953	0.136604	-0.0743189	1.06799	0.543359	0.796163	0.221892	1.11629	0.411564	0.806926	-0.0992227	0.475953	1.32737	0.0493393	0.391291	-0.330482	0.482095	0.272456	0.892425	0.1693	0.526323	0.499144	1.24559	0.0361996	0.64979	-0.0327969	0.199514	0.549201	1.45791
659	-1.40123	0.238503	-2.92019	-0.126475	-1.04978	0.418343	-1.14784	-0.174735	1.27841	-2.78368	-0.75973	0.0670576	-1.99933	-0.927599	-1.70306	0.362972	-1.70923	-1.55965	-1.09772	-0.0975976	-0.656143	-0.600172	-0.471409	0.941494	-2.60328	1.13036	-1.67897	0.0594845	-0.3059	-0.578813	-1.0714	-0.334278	0.432659	0.719684	-0.809484	-1.10077	-2.30559	-1.28178	1.8434	-0.466573	-1.06434	-0.306055	0.562531	-2.84876	-0.572507	-3.30354	-2.11413	-1.18123	-0.484567
660	1.6447	-2.78983	1.26212	-0.27669	2.37111	-0.283737	0.614772	0.000264168	1.05036	-0.210575	0.42496	-2.13387	1.13268	1.51099	1.35803	1.29893	1.13461	1.30884	1.57627	0.890083	1.23193	-0.975385	1.47129	0.38939	1.63824	1.24751	1.29759	0.344329	1.88651	0.694228	1.45606	2.4937	1.11003	0.116407	-0.135586	0.703779	1.17012	0.668618	-0.067502	1.5359	0.948419	1.21123	0.230486	1.03598	0.318368	0.345878	0.366296	0.894686	-0.210109
661	-1.04164	0.693462	-1.56001	0.225108	-1.8443	-0.40589	-2.48254	-1.08782	-0.981953	-2.69745	-3.10278	-1.88709	-3.11948	-0.923175	-2.11322	0.144493	-1.93919	-0.318175	-1.24242	-0.200723	-3.44624	-0.332324	-0.944018	-0.745883	-2.38948	-0.83798	-0.964068	-0.37658	-1.45668	-0.68631	-3.03983	-0.68451	-1.13573	-0.867528	-1.3446	-0.836627	-2.85172	-2.70627	-0.502185	-2.19731	-2.48956	-2.12047	-0.197879	-0.247931	-1.56444	-1.82689	-1.00772	-0.524149	-0.3849
662	6.58308	4.25878	5.91577	5.16562	6.48127	4.83643	5.17141	5.34754	5.86564	4.81116	5.84182	4.57915	5.19467	4.36378	5.41175	5.45705	5.93357	5.89788	5.65132	5.67832	5.19087	4.05299	5.8522	6.15198	6.17438	4.42681	6.45775	5.2029	6.53183	5.86228	5.691	6.05009	4.82713	5.6063	4.74649	5.02073	6.32601	5.85793	5.85709	5.69315	3.93936	5.1047	4.01968	5.72178	4.87891	4.99588	4.74639	5.92742	4.97338
663	5.19184	6.86156	4.9138	5.93219	5.15848	6.27025	4.96465	5.37423	4.82843	4.91114	4.74199	6.62934	4.68754	5.13925	3.95098	4.98843	4.90972	5.45886	5.60507	6.07753	4.79121	5.01007	5.302	6.36814	4.9685	6.15011	5.38215	5.90872	4.97337	5.64241	4.59105	5.76884	6.09116	6.29285	4.84409	4.38481	4.75119	5.01799	5.38584	4.94088	5.58147	5.38901	6.03338	5.21385	5.36378	4.23833	4.67605	5.58802	6.34127
664	-0.4569	0.0662842	-0.763698	0.168766	-0.841977	0.177804	-0.33156	0.151867	-3.96008	-0.142252	0.846288	0.794411	-0.306133	1.17203	-0.674469	-0.0379386	-0.591699	0.314094	-0.343213	0.143836	-0.706306	1.47304	0.453915	0.708346	-0.710395	0.661658	-0.284736	0.871652	0.346881	0.135493	-0.472321	-0.0961542	0.980969	-0.288963	0.375436	-0.708692	-0.76835	-0.338301	1.79486	-0.555099	0.698005	-0.731672	1.06492	0.564169	-0.0399256	-0.709155	-0.616689	-0.428246	0.363249
665	4.7591	2.33965	4.51716	4.5316	4.41816	3.70522	4.12494	3.84846	3.92782	3.51383	4.05578	2.84181	4.19769	3.71598	3.77792	3.98612	4.35099	3.92069	4.40861	4.23596	4.27893	3.19558	4.45667	3.98019	4.22704	3.8151	4.89791	3.51418	4.53227	4.09836	4.06351	4.39548	3.37456	3.84597	3.48286	3.96971	4.57556	4.61798	3.93345	3.87079	3.11445	4.20213	3.16467	3.97636	3.86834	3.74701	3.91586	3.85067	3.52332
666	-1.89344	-2.31539	1.37992	-1.76786	-1.71382	1.05343	0.561139	-1.73114	-0.165806	-2.69136	-3.0574	-2.78804	-0.858272	-2.45959	-1.99101	-3.22995	0.0741329	-1.95204	-0.351552	-2.65697	-2.57637	-3.55745	1.03994	1.72053	-2.43583	-2.66956	2.11621	-1.11901	-0.276012	-2.52047	-0.107756	-0.907706	-1.82548	-1.79406	-2.64009	-0.478433	-0.825453	-0.869695	-3.74884	0.399657	-0.682224	-1.63998	-2.52737	-2.2439	-2.25236	-2.58917	-2.48069	-2.39452	-2.0799
667	-2.93336	-0.368206	-2.05904	-0.777168	-1.90644	-0.0807304	-3.04433	-0.627293	-2.37726	-2.91547	0.331328	-0.47176	-3.2335	-0.354306	-2.26133	-0.57158	-1.99906	-1.24939	-3.0309	-0.862395	-0.800515	-0.68628	-2.49383	-0.547554	-2.53734	0.225601	-2.88284	-0.456042	-1.32488	-0.586274	-2.64675	-0.735975	-0.160367	0.513322	-0.521275	-3.23272	-3.71772	-3.46952	0.702099	-1.96004	-2.56729	-0.88521	-0.382024	-2.89823	-2.70994	-0.439382	-2.6484	-2.88156	-1.02349
668	3.07486	0.924758	2.93732	2.34511	3.09297	1.77304	2.48231	2.10187	2.67544	1.92515	2.16339	0.488567	2.64465	1.15681	2.39319	2.13624	2.58652	2.20027	3.24877	2.83456	3.04424	1.16473	3.38009	2.69153	2.85287	1.39339	2.89353	2.21951	2.69685	2.71178	2.4745	2.83199	2.79151	1.51286	2.24596	2.69707	2.62368	3.02527	1.54037	2.32537	2.02999	2.41768	1.55118	2.11138	2.18855	2.2907	2.20088	2.18295	2.26499
669	-1.01962	-0.399632	-1.43667	0.231604	-1.26426	-0.991391	-2.146	0.151437	-1.59325	-1.829	-1.77052	-1.13284	-2.25963	-2.13878	-2.49714	-1.46491	-1.95714	-1.37967	-2.04277	-0.483179	-1.22392	-2.11621	-1.88343	-0.119767	-0.70014	-2.58671	-1.22189	-1.34695	-1.04274	0.545412	-1.86513	-1.43228	-0.937732	-1.48472	-0.816846	-2.74201	-2.51063	-2.4179	0.273211	-2.23099	-1.16013	-1.47534	-0.370045	-1.36637	-1.18378	-2.58474	-2.6638	-0.452463	-0.163962
670	-0.00761175	0.662143	-0.341735	0.881283	-0.138943	0.391491	-0.455001	0.38098	-0.369882	-0.138393	-0.275902	0.61201	-0.316737	0.316225	-0.302452	0.318023	-0.151425	-0.0790043	-0.182806	0.509325	-0.179931	-0.613805	-0.0178537	0.59468	0.188864	0.166942	0.0223765	0.331431	-0.00670052	0.419793	-0.845507	0.0648613	-0.0816517	-0.521657	-0.0119505	-0.414819	-0.330698	-0.362745	0.436843	-0.69715	-0.204791	0.0473757	0.311097	-0.630943	0.199713	-0.954691	-0.449691	-0.117532	0.629464
671	0.0488	1.69943	-0.210304	0.445275	-0.317202	1.02475	-0.660902	-0.200755	0.453387	-0.466593	0.0991802	1.15204	-0.264469	0.5736	-0.0994163	0.757432	-0.205083	0.0550222	0.32244	0.488433	-0.364292	0.0485225	-0.317053	0.851705	-0.194167	1.06466	-0.22194	1.4094	0.829628	0.700887	-0.234871	0.131869	1.32104	1.09047	0.150566	-0.436328	0.223927	-0.171703	1.31788	-0.306436	0.156685	0.237866	1.1504	0.212167	0.105162	-0.269546	-0.132037	0.0845675	1.14188
672	-2.92238	0.737998	-1.54028	-0.627314	-3.09921	-0.262741	-1.42415	-1.33065	-2.27561	-1.57575	-2.42835	0.549151	-2.85502	-1.75489	-2.47455	-1.49026	-1.42452	-1.35651	-2.29932	-0.812992	-2.02673	-2.42349	-1.61353	-1.38645	-1.90624	-2.27999	-2.19101	-1.78042	-1.78077	-1.27677	-2.12967	-2.32258	-2.89138	-1.8852	-1.61054	-1.44243	-1.7686	-2.60208	-0.528428	-2.33418	-1.4154	-1.25195	-1.37336	-2.02577	-1.39822	-1.32734	-2.52453	-2.2645	-1.55206
673	1.73669	1.33895	1.53819	2.48353	1.3655	3.22247	0.934621	1.75042	1.9187	1.06453	1.64058	2.12984	1.10486	2.50573	1.59815	2.36062	1.44946	2.0029	2.04304	2.50179	1.3168	1.75973	1.66067	2.58071	1.54737	2.62306	1.57634	2.96641	1.87606	2.45664	1.01016	1.92304	2.59465	3.10882	1.5911	0.850167	1.28426	1.28824	3.2827	1.44125	1.65851	2.00813	2.66657	1.10893	1.44698	0.987231	1.28559	1.91176	2.49625
674	3.35437	1.61563	3.51512	2.87974	3.95269	2.33298	2.7275	2.84322	3.10788	2.37441	3.13481	1.94503	3.25001	2.5536	2.54691	2.96288	3.48967	3.02589	3.17964	3.36362	3.41853	2.33696	3.2537	3.55999	3.65866	2.48305	3.60458	2.55451	3.58603	3.31627	2.8426	3.19944	2.07913	3.1214	2.52567	2.60742	3.66371	3.43497	2.72388	2.59109	1.74564	3.09908	2.32875	3.26875	2.48595	2.84704	2.94807	3.42166	2.88773
675	-0.120747	-1.35763	-0.164783	0.578545	0.152749	1.35286	0.422155	0.0282736	0.958319	0.885952	-0.16237	1.30756	-0.374259	1.09705	0.0896478	1.46579	0.00215435	0.521514	0.621753	0.999406	-0.122673	-0.583348	0.170514	1.95762	0.0974369	1.60814	0.0941625	1.9511	0.961638	0.494879	0.291796	0.613981	1.59423	0.556105	0.452737	0.0935278	0.183012	0.54121	1.51179	0.501334	1.33719	0.245489	1.88902	-0.128078	1.75206	-0.147489	0.551373	-0.134625	1.25693
676	-0.158475	-1.46353	-0.24366	-0.925517	-0.314304	-1.24192	-0.407807	-0.821774	-0.924787	-0.77928	-1.12014	-2.06025	-0.543878	-0.839025	-0.583434	-0.825274	-0.336384	-0.557137	-0.305969	-0.55522	-0.227162	-1.1388	-0.224968	-0.671737	-0.230854	-0.619637	-0.529375	-1.28932	-0.536191	-0.77774	-0.500815	-0.373866	-0.792602	-0.778514	-0.879657	-0.466974	-0.147043	-0.276936	-1.10717	-0.703273	-1.43936	-0.507911	-1.13227	-0.541796	-0.74305	-0.58491	-0.681314	-0.275508	-0.790282
677	-1.5527	-0.00711823	-3.09282	-0.306195	-2.79477	-0.150835	-3.19223	-0.865715	-1.35785	-2.29083	-3.11572	-0.466755	-1.53327	-1.03445	-2.66823	-1.1583	-1.29665	-1.35672	-0.853482	-1.15721	-2.91888	-1.14799	-0.921111	-1.074	-1.25387	-1.06054	-1.00008	-0.231782	-2.05682	-0.714304	-2.01989	-0.81236	-1.43652	-0.729844	-1.1901	-1.93438	-2.92018	-1.53161	-0.261859	-4.01054	-1.02908	-1.4118	-0.689998	-2.71902	-1.02138	-2.47548	-3.98283	-1.18678	-0.918578
678	-1.42288	-0.523535	-1.3394	-0.566735	-1.66979	-0.666854	-2.61052	-0.918956	-2.23159	-1.77028	-2.74781	-0.626661	-3.7084	-0.945215	-2.00491	-1.66118	-1.40721	-1.49247	-3.693	-1.17556	-2.69858	-2.80331	-1.624	-0.723161	-1.63044	-2.81829	-1.40551	-1.22556	-1.26273	-1.1639	-1.74534	-2.31197	-1.67463	-1.59223	-1.43625	-3.07652	-3.34128	-2.92606	-1.0656	-3.13624	-2.35548	-1.37752	-0.773762	-1.55123	-1.10288	-2.42456	-2.52305	-1.90811	-1.23127
679	2.26445	3.33668	2.10544	3.02237	2.24565	2.88263	1.77225	2.53984	1.89228	1.32914	2.03163	2.89296	1.81382	2.59584	1.47052	2.62711	1.84163	1.82399	2.1984	2.74623	2.0434	1.80707	2.12619	2.86037	2.08796	2.51929	2.18751	3.10609	2.56188	2.83557	1.85002	2.45611	2.54945	2.07856	2.05422	1.6708	1.94501	1.8477	3.53529	1.60439	2.05632	2.26005	2.91424	1.75285	2.18438	1.28704	1.36878	2.18642	3.02073
680	4.1471	-0.425346	4.05623	3.27609	3.76014	3.02766	4.24572	4.04105	3.76657	2.98248	3.65953	1.67066	3.8631	2.39287	3.22852	3.89272	3.23246	2.66175	5.17437	4.60757	3.57808	-0.056869	5.44148	4.43996	3.3323	1.81344	4.30507	2.54458	3.78937	3.81446	3.69786	4.33187	3.26644	2.32609	3.76792	4.22371	3.3804	4.80862	0.506104	3.52288	3.19376	3.78061	1.18249	2.76561	3.65238	3.38854	3.18264	3.48147	1.71495
681	-2.51451	-0.153934	-2.72538	0.075181	-3.4374	-0.654292	-2.90637	-2.50231	-0.0546532	0.725747	-2.99034	-1.98298	-2.87176	-0.0944166	0.345923	2.18191	-3.47053	0.512258	-0.055407	-0.112938	-3.55768	1.35117	-2.26385	-0.664967	-0.62547	1.54775	-2.92203	4.33965	-0.263338	-0.267986	0.112493	1.44854	2.2792	-2.46639	-2.57169	-2.53525	-0.519737	-0.546322	2.45553	-3.24905	0.496048	1.24914	0.270066	-2.51313	-0.189987	0.275839	-2.29696	-1.62288	-0.22733
682	-0.939955	-0.609895	-0.692875	-0.495728	-2.50358	-0.24154	-2.32117	-1.07788	-1.21294	-1.47289	-0.411344	-0.458747	-2.48899	-0.284142	-2.26921	-0.396933	-3.29604	-0.107769	-0.870982	-0.11611	-0.776855	-3.31452	-0.949254	0.472516	-2.85458	-0.0807142	-3.78337	-0.101212	-0.83644	-0.52213	-2.34851	-0.907395	-0.284846	-0.289907	-0.63112	-3.11473	-1.03845	-1.03535	0.339561	-3.73175	-0.687205	-2.35358	-0.447731	-2.98012	-0.61982	-2.06452	-2.4948	-1.19663	-0.16835
683	-2.73377	-4.28898	-2.5422	-1.62634	-2.20238	-1.82274	-2.66712	-2.36042	-1.83321	-2.73396	-2.23188	-1.44539	-2.91237	-1.03541	-2.69107	-0.774598	-2.83699	-2.39071	-1.66074	-1.0361	-2.82503	-1.04866	-2.09811	-1.61715	-3.11134	-0.454743	-3.21906	-0.898877	-2.03881	-2.18322	-2.78408	-2.18077	-1.15727	-2.60146	-2.67856	-2.48728	-2.50945	-3.69218	-0.462039	-2.91583	-1.79053	-2.785	-1.34972	-1.98587	-1.38023	-2.45449	-3.01131	-2.06477	-1.79985
684	0.430459	1.72806	0.716908	1.39874	0.783528	1.4225	0.368378	0.950097	0.968939	0.387604	0.219328	1.17355	-0.0445585	1.10917	-0.419706	1.64485	0.587256	0.932277	1.27502	1.71569	0.458979	0.93239	1.17016	2.07939	0.284368	1.40476	0.99862	1.88304	1.00626	1.12626	-0.0399652	0.886073	1.68149	1.30624	0.488512	0.258386	0.775726	0.778769	1.97734	0.638808	1.20935	0.64346	1.7279	0.415497	0.926587	-0.169943	-0.0344629	0.915278	1.49322
685	-0.0831904	-2.67552	-0.220584	-0.592218	-0.159135	-1.96167	-0.677016	-1.68379	0.421444	-1.14665	-0.899265	-2.3429	-0.238388	-0.704296	-0.892193	-0.366747	-0.358984	0.0666304	-0.10016	-0.196202	0.064949	-0.781303	-0.377128	-1.15418	-0.434628	-0.204502	-0.679291	-1.93761	0.134818	-0.885085	-0.491353	-0.463223	-1.845	-2.42314	-1.16867	-1.75547	-0.326856	-1.15878	-2.69238	-0.296106	-2.63317	-0.375912	-1.90583	-0.344385	-1.14451	-0.387409	-0.1243	-0.407871	-2.60346
686	0.650402	-2.15827	0.513711	-0.187056	4.04085	2.13166	0.532564	-2.45691	0.590076	-0.270648	0.611632	-2.87072	0.450664	-2.44158	2.35889	2.79812	0.864596	0.169739	3.33004	2.98411	0.955165	-2.48516	0.822686	0.324629	0.625976	-0.250126	0.474941	-2.36902	1.29341	0.437431	2.4033	2.37939	-2.81717	1.04274	0.929047	1.37788	0.0209341	-0.1648	0.472374	-0.944764	-3.46054	1.78289	0.68631	2.05724	1.42346	0.547393	0.0541477	0.214878	-2.51343
687	3.14703	3.09557	3.18178	4.19361	3.24252	4.41716	2.37768	2.95033	3.0399	2.50043	2.93479	4.12975	2.67087	3.54866	2.27638	3.65232	2.83137	3.12075	3.36078	4.13068	3.20545	2.59669	3.07888	4.29055	3.15906	3.82225	2.91352	4.77517	3.39552	3.66136	2.61206	3.61575	3.52926	4.63704	2.84638	2.25693	2.87551	2.5567	5.3883	2.62577	2.8491	3.3307	4.58778	3.02838	3.43985	2.3544	2.46102	3.38401	4.39085
688	3.12672	-3.25644	3.2175	2.13332	2.79297	1.42617	1.65982	1.72485	2.65726	2.12359	2.19073	1.12114	2.25211	1.32234	1.84305	0.835962	2.12666	2.43812	1.92007	1.87624	2.45656	-2.24114	2.14572	1.93897	2.69703	1.07266	2.47988	1.87855	2.6875	2.34044	2.59879	2.46065	1.54991	2.8897	2.07155	2.06481	2.38324	2.1054	1.31094	1.91016	0.869792	1.96733	1.30428	2.43841	1.53126	2.72099	2.06875	2.45463	1.47176
689	2.51092	2.52066	2.56413	3.62401	2.54792	3.41793	1.77079	2.20629	2.31179	1.49902	2.18074	3.23204	2.0003	2.70886	1.79126	3.08318	2.13705	2.4145	2.61484	3.44333	2.41765	2.03588	2.4742	3.73797	2.6478	3.39895	2.3948	4.47983	2.66308	2.93071	2.04921	3.12326	3.10869	3.60905	1.92953	1.55689	2.17329	1.97706	4.51863	2.07748	2.28926	2.57098	4.11161	2.40673	2.69355	1.53205	1.52643	2.64731	3.72595
690	-0.959125	-0.351447	-2.99149	-0.928923	-1.92697	0.95268	-2.42362	-0.863723	-0.94561	-1.14095	-0.645757	-0.514205	-1.65717	-0.530138	-1.41707	-0.617144	-1.28098	-2.08684	-1.09	-0.386941	-1.43056	-1.80835	-1.3584	0.249074	-1.28298	0.0438414	-2.81368	-0.175057	0.0308018	-1.23318	-1.57631	-0.374457	-0.483393	-0.010685	-1.24754	-1.63322	-2.66828	-1.36896	-0.325429	-2.72873	-1.70923	-3.80816	-0.652636	-1.79925	-0.694146	-2.35445	-2.89423	-1.13419	0.223679
691	0.57136	0.30296	0.870976	1.3222	0.711299	1.95645	0.00728512	0.0331182	0.700802	0.241793	0.790894	2.03035	0.326224	2.32903	0.281788	2.20601	0.52879	1.00181	1.17063	1.7691	0.911572	0.903596	0.712124	1.2257	0.745664	2.9065	0.83181	2.78351	1.02641	1.12987	0.323976	0.538107	2.23624	0.6453	0.474249	0.385377	0.873687	0.710572	2.48203	0.601075	0.949298	0.894505	2.32916	0.595164	0.976165	-0.0504255	0.170076	0.968871	3.05451
692	-0.44435	-1.01263	-0.770217	0.233027	-0.927994	1.18497	-0.878344	-0.48589	-0.279071	-0.908808	-0.489821	0.334705	-0.794992	0.330624	-0.658556	0.147815	-1.06563	-0.652372	-0.386406	0.36249	-0.424396	-0.31314	-0.574893	0.402229	-0.488393	0.929829	-0.374703	0.815699	-0.296006	0.279379	-1.11007	-0.255217	-0.0105877	1.36714	-0.473289	-1.14691	-0.628955	-0.832647	1.09699	-1.04049	-0.238831	-0.0535679	0.680333	-0.944613	-0.415432	-0.827531	-0.946522	-0.20713	0.494092
693	-0.508968	0.389962	-2.58423	-0.113158	-0.76533	-0.101374	-1.16276	-0.669368	-0.999385	-0.656951	-0.969374	0.379453	-3.70731	-0.821864	-3.13154	-0.618218	-1.97697	-2.84176	-3.07068	-0.42208	-3.28458	-2.32964	-0.736197	-0.250309	-0.463798	-0.560549	-0.0633187	-0.0627813	-0.742842	-0.655452	-2.38776	-0.434866	-0.58357	-0.127024	-0.731494	-2.24488	-2.27973	-0.157239	0.343241	-2.80127	-0.01406	-0.401029	-0.103655	-0.90976	-0.69348	-2.43456	-2.45199	-0.799971	-0.134773
694	-0.462544	1.32525	-0.809555	0.189269	-0.737092	0.134163	-0.866538	-0.858183	-0.10817	-0.169885	-0.0995026	0.582306	-0.970952	-0.19499	-0.641173	-0.221893	-0.817476	-0.582576	0.237847	0.277819	-0.815814	-0.795767	-0.254071	-0.363174	-1.10837	0.285856	-0.712712	0.404627	-0.508863	-0.305516	-0.626144	-0.249695	0.701859	-1.62358	-0.59821	-0.759046	-0.769917	-0.717363	-0.065484	-0.607668	-0.284032	-0.0593672	0.32914	-0.369081	-0.271406	-0.833883	-0.62626	0.0342278	1.35352
695	1.38242	2.17398	1.16477	2.00082	1.34292	2.36303	1.00676	1.30759	1.50199	1.04055	1.30693	2.22774	1.04369	1.99088	1.05998	2.06595	1.28025	1.4449	1.71267	2.1057	1.26652	1.3173	1.47398	2.71652	1.32311	2.25628	1.40147	2.4706	1.61139	1.76597	0.871593	1.58684	1.90121	2.66887	1.27027	1.00793	1.27436	1.1735	3.00644	1.00549	1.69753	1.4677	2.31602	1.21301	1.63519	1.01859	1.18123	1.41592	2.31221
696	-1.60825	-0.875085	-1.69416	-0.880157	-1.51214	-0.718175	-3.46596	-0.569484	-0.492243	-0.755644	-2.61882	-0.783373	-2.39994	-0.628418	-2.67939	-2.1618	-0.946618	-2.73287	-0.162969	-0.804324	-2.80761	-1.6533	-0.24217	-0.788455	-3.04123	-0.421668	-0.945323	0.351733	-2.90139	-0.89335	-3.44079	-0.340023	0.0909996	-0.542982	-0.911241	-2.95514	-2.11186	-0.744012	-0.513439	-1.9904	-0.563485	-0.76599	-0.464406	-3.21364	-0.808151	-1.97906	-2.21856	-2.78406	0.547446
697	-0.921042	-0.790769	0.67226	-2.35931	-1.1795	-0.340589	0.0732794	0.952821	0.0682516	-2.81188	1.27115	-2.82489	-0.561629	-3.11346	0.292776	-1.35642	0.545459	-2.62702	0.248278	-2.8108	-0.911438	-2.97609	-0.380552	1.24303	-2.96547	-2.38257	1.05481	-1.21374	-0.0127115	-2.3788	-0.711715	0.632309	-3.02977	-3.01967	-2.82262	0.223074	-0.0766821	-0.312196	-2.67173	-0.535898	-0.168024	-0.730173	-2.81767	-2.31494	-2.58784	-2.22523	-1.32952	-2.44131	-1.08067
698	1.82311	3.25111	1.71748	2.26739	2.01686	2.45318	1.41231	1.90105	1.67444	1.12908	1.45484	3.17054	1.42291	2.80538	0.991424	2.33318	2.14293	2.37921	1.13936	1.43699	1.94216	2.07223	1.92397	3.88268	1.9684	2.55059	1.17257	2.21766	2.50074	2.01105	1.09497	1.78123	2.59954	1.9863	1.49816	1.26279	1.81856	1.78013	3.19977	1.85802	1.90202	2.03622	3.21086	1.69591	2.40196	0.777992	1.32412	2.1355	2.68868
699	-0.954987	-0.922491	-0.798927	-0.0847359	-0.846461	-0.584593	-2.40318	-0.207789	-0.813365	-2.44485	-2.72653	-0.434538	-1.03502	-1.19719	-2.55387	-0.61072	-0.783712	-0.896694	-2.23045	-0.884072	-1.03402	-0.651669	-1.2648	-0.340446	-0.348698	-0.552255	-0.489801	-0.981077	-0.672275	0.172707	-1.56675	-1.13441	-0.781943	-0.797984	-0.735697	-3.453	-3.37405	-3.15551	-0.132732	-2.45391	-1.22519	-0.767303	-0.126483	-3.38989	-1.44119	-2.2704	-2.15823	-0.978773	-0.178504
700	1.33264	1.97443	1.03548	1.97479	1.14478	2.33995	0.834614	1.28443	1.03083	0.468595	1.17494	1.81382	0.755714	1.5712	0.924951	1.60846	1.04305	1.09587	1.49649	1.90791	1.12469	0.917223	1.2274	2.08496	1.1585	2.05539	1.22222	2.20861	1.49232	1.7133	0.898492	1.62498	1.63807	1.90403	1.07147	0.589962	0.957936	0.681471	2.43348	0.829719	1.16063	1.2362	1.95263	1.05421	1.46048	0.602795	1.01131	1.35645	2.00777
701	-2.59645	0.585361	-3.20648	-0.160362	-3.62842	0.126716	-2.12972	-0.458089	-0.795049	-2.14943	-2.66212	-0.249308	-0.617263	-0.571794	-2.85597	-0.183355	-3.86703	-2.56185	-3.62653	-0.403347	-2.46938	-3.18053	-0.639565	-0.191275	-0.675319	-0.453331	-2.30538	0.0345106	-2.38995	-0.262319	-2.15395	-0.662352	-1.65967	0.313505	-3.44961	-2.32894	-2.68754	-0.414561	0.459079	-0.846466	-2.97342	-1.73722	-0.00864792	-1.0618	-0.40878	-2.83333	-1.90647	-2.43485	0.0940065
702	0.0251126	1.40045	-2.45805	-0.441176	-3.0634	0.757158	-2.82319	-0.693633	-1.09268	-3.16482	-0.800821	0.243244	-3.13958	-0.172249	-0.410263	-0.851973	-1.42996	-2.66865	-0.306804	-0.14228	-2.88923	0.693979	-0.731438	-0.253216	-2.25271	-0.306829	-0.5585	-0.139218	-0.396903	-0.157128	-0.247246	-0.354556	-0.693127	-0.470406	-0.634678	-2.65857	-1.61731	-2.66554	0.210928	-2.42047	-0.432461	-0.32329	-0.304104	-2.31583	-0.911747	-3.21743	-3.30279	-1.1425	-0.219731
703	-1.61408	-0.974564	-3.11138	-1.21825	-2.45387	-0.977155	-3.10899	-1.51004	-1.6217	-1.3988	-1.44092	-1.17245	-1.91813	-0.954361	-2.0414	-0.723423	-0.189549	-1.38051	-1.35981	-1.13671	-1.91669	-0.199208	-1.37496	-1.73142	-1.44873	-0.742863	-0.657099	-0.45163	-0.742715	-1.0296	-2.91591	-1.07674	-0.838997	-1.38973	-1.63193	-3.41381	-2.86082	-2.53051	-0.757731	-2.95105	0.541942	-0.361692	-0.241536	-1.32531	-1.1606	-2.18232	-2.02409	-0.585642	-0.616001
704	1.19762	6.08976	1.56536	4.09278	1.82137	3.30027	1.91095	2.40964	2.3288	4.30373	3.01557	4.1188	1.16418	1.88317	1.87717	1.89791	1.37024	2.87692	0.932926	2.95104	1.30341	1.63126	0.910242	2.425	1.41465	1.29098	2.04269	2.2154	1.42735	1.93372	1.51349	2.72442	1.15762	1.42724	2.65066	0.721053	1.23012	1.00981	2.75601	1.39116	1.87891	2.68752	2.52852	3.33694	1.88999	1.18682	1.89692	2.32348	2.38603
705	-0.591806	-2.83361	-1.20916	-1.4493	-0.532628	-1.69635	-1.65017	-3.35579	-0.381577	-2.73858	-1.2675	-2.10219	-1.25418	-1.45379	-0.48384	-1.36897	-0.574276	-0.65224	-1.24733	-1.21872	-0.804476	-1.33704	-1.5864	-1.2682	-0.663517	-1.20066	-1.24167	-1.26243	-0.468615	-1.43659	-0.887092	-0.737582	-1.17673	-1.66582	-3.87342	-1.50258	-0.956353	-1.03535	-1.55676	-0.550855	-3.05151	-1.26827	-1.4436	-0.715574	-1.92469	-0.836812	-3.04142	-1.0354	-2.27917
706	2.35252	2.8717	2.26736	3.23182	2.50626	3.30678	1.9748	2.32973	2.60463	2.02535	2.25329	3.35217	1.93356	2.80911	1.81248	2.90387	2.16721	2.62488	2.65641	3.09871	2.21704	2.25641	2.3775	3.33783	2.38046	3.00956	2.57275	3.85576	2.69055	3.0266	2.06361	2.64565	3.12349	2.89557	2.16401	1.87334	2.33963	2.10568	3.80288	2.27549	2.55919	2.6384	3.12213	2.6205	2.83904	1.68433	1.83724	2.85834	3.56473
707	1.90196	2.76848	1.56746	3.13778	1.66752	2.24334	0.50251	1.50183	1.69037	0.91633	1.17028	2.16616	1.02623	1.80333	0.82054	1.95612	1.49699	1.56703	1.35392	2.3218	1.41768	1.00481	1.72162	3.00121	0.980558	1.60456	1.48674	3.99318	1.99364	2.21476	1.17405	2.52668	1.64444	1.79575	1.31182	0.345393	1.50324	1.46775	2.68072	1.01388	1.20227	1.642	3.08149	1.68463	1.42309	1.08987	1.16143	1.95198	2.78727
708	-0.885137	0.831824	-1.16438	-0.205799	-0.885256	0.103173	-1.23284	-0.425364	-0.879617	-1.05872	-1.01679	0.0238123	-0.759905	-0.832273	-1.69937	-0.858735	-1.24048	-0.991235	-0.716697	0.007792	-1.09673	-1.39626	-0.722465	0.849376	-1.05429	-0.300833	-0.977553	0.0270452	-0.0315914	-0.306515	-1.18116	-0.607828	0.0706205	1.03173	-0.330505	-0.656309	-1.41345	-0.0561724	0.511277	-1.29895	-0.647326	-0.826358	0.422559	-1.55072	-0.778113	-1.27029	-0.936107	-1.36469	-0.107446
709	-1.0237	-0.850886	-2.67489	-0.485066	-3.22176	-0.11053	-1.01263	-1.05329	-0.562662	-1.00427	-3.0269	-0.262174	-1.15761	0	-0.587901	-0.130069	-2.99002	-3.77822	-0.472412	-0.412662	-1.03287	-0.122326	-0.648191	-0.42229	-2.54267	0.324909	-0.406188	0.054924	-1.9228	-0.803897	-2.14518	-1.08705	0.0449066	-0.914372	-0.781438	-1.16257	-2.15608	-0.72767	-0.420996	-1.03326	-0.229874	-0.723808	-0.125492	-2.59485	-0.70982	-0.681135	-1.1433	-1.30963	0.129495
710	3.35678	2.97566	3.23531	4.0857	2.18929	4.61514	2.6185	3.32368	3.41997	2.80131	3.29653	4.17224	2.35976	3.89226	2.68478	3.96463	2.33004	3.09076	3.54992	3.55482	2.78754	2.78019	3.4304	4.56176	3.39235	4.06162	3.41263	4.78699	2.91115	3.91033	2.48302	3.82001	3.7209	4.31089	2.87883	2.59281	2.87306	3.14013	4.541	2.87036	3.06665	3.40975	4.54705	3.23838	3.5341	2.78946	2.906	3.70005	4.62252
711	1.63011	-3.1354	1.34797	0.843384	0.848936	0.00107956	1.40166	1.04634	1.66731	1.04986	1.51804	-2.12367	1.05082	-2.73957	1.21016	0.368388	1.12641	0.254733	2.48401	1.884	1.51961	-0.417853	2.50062	1.72716	1.99538	0.17908	1.65663	0.691089	1.31486	0.884584	1.44356	2.33116	0.701449	0.778101	1.37977	1.95804	0.741736	1.97947	-0.771663	0.92484	1.03248	1.26878	0.0567808	0.853618	1.79388	0.904684	0.639819	0.413054	-0.587456
712	4.84554	2.51209	4.61602	4.63424	4.41699	3.73655	4.23256	3.93153	4.02321	3.63832	4.21004	2.99397	4.33474	3.87359	3.79935	4.04934	4.4241	3.97987	4.51613	4.34042	4.27793	3.36958	4.50504	4.03576	4.20459	3.87798	4.98951	3.5796	4.53904	4.18305	4.03216	4.4617	3.40415	3.86905	3.67501	4.02023	4.63527	4.64758	3.83805	3.8965	3.13446	4.18465	3.11501	4.13948	3.9843	3.88235	4.055	3.88786	3.58274
713	-1.27177	-3.60033	-1.54101	2.45643	-2.1055	-0.904047	-2.25175	-1.69083	-0.949455	0.525721	1.51775	2.83596	-3.61951	0.554028	-3.55825	1.43122	0.0204315	0.993637	-1.73848	0.57673	-0.672879	0.382358	-1.82008	-0.592541	-2.15783	-0.252966	-0.504626	-1.3962	0.0905905	0.0468655	-1.88841	0.572026	-2.03581	-0.360844	1.91333	-0.52915	-3.05804	-2.32911	2.4062	-0.148008	0.972136	-0.057477	-2.54072	1.60786	1.06355	-0.515234	-1.05142	-2.2405	1.55779
714	-1.82309	-0.670647	-2.25543	-1.29174	-2.53692	-0.509537	-2.79224	-3.08804	-2.05192	-2.16185	-2.90636	-1.36258	-2.41268	-2.51198	-3.3695	-1.14984	-2.59271	-2.07778	-2.22078	-1.31547	-3.11447	-1.42292	-1.69621	-1.132	-2.80092	-0.433489	-3.10814	-1.1559	-2.90861	-1.90212	-2.37235	-2.08159	-1.04194	0.209693	-2.07213	-2.59749	-2.72798	-2.65686	-0.141289	-2.59411	-2.92665	-2.55093	-1.40852	-1.87733	-3.16365	-2.68052	-2.19676	-2.11209	-1.48032
715	-1.23541	-1.31175	-2.10796	-0.964252	-1.29831	-1.01976	-2.87248	-1.0119	-2.29095	-2.68283	-2.88635	-1.31157	-2.55282	-2.59026	-2.19382	-1.27335	-1.39604	-1.56651	-2.31974	-1.23588	-1.58085	-3.30193	-2.60759	-1.11241	-2.86702	-1.17922	-2.43265	-0.962552	-1.82392	-1.03324	-2.96194	-0.854735	-0.989133	-1.04165	-2.4287	-2.2579	-2.47739	-1.98825	-1.23265	-2.15667	-2.01079	-1.24985	-1.02873	-2.52904	-1.23801	-2.14158	-1.72295	-1.20411	-0.733273
716	0.189101	1.41237	0.273468	1.08512	0.442427	0.864525	-0.212947	0.494205	0.142986	0.0306854	0.107639	0.881137	0.0601215	0.568472	-0.476622	0.527927	0.187721	0.532944	0.202244	1.01191	0.123838	0.228314	0.128405	1.52194	0.318943	0.551424	0.305369	0.832246	0.314009	0.659709	-0.261431	0.429581	0.764959	0.519515	0.164964	-0.394889	0.145042	0.0456991	1.67076	-0.198265	0.21583	0.515234	0.850114	0.263145	0.363218	-0.320741	-0.370093	0.308389	0.729561
717	-0.867499	0.516779	-0.728216	-0.283249	-0.683159	-0.455384	-1.12534	-0.45015	-1.17539	-1.25019	-0.70613	-0.132417	-1.13264	-0.858868	-2.48078	-0.896995	-0.951413	-0.495567	-1.17967	-0.682147	-0.638036	-0.680594	-1.34863	-0.487565	-0.962423	-0.810225	-0.680597	-0.756796	-0.874553	-0.469042	-0.938344	-0.587739	-0.838652	-0.911373	-0.728637	-2.5535	-2.5762	-1.8712	0.121347	-2.72454	-0.514326	-0.940107	-0.577441	-0.230131	-0.665038	-2.18325	-1.22399	-1.63853	-0.54814
718	-1.18831	-0.648667	-2.68492	-0.806055	0.269483	-0.561436	-1.53634	-1.32465	-1.58875	-2.51358	-0.444489	-0.396967	-1.40891	-0.991775	-1.61439	-0.952829	-1.79731	-0.598218	-2.33099	-0.685062	-3.30327	-1.42302	-2.88121	-0.643971	-0.894005	-0.699305	-1.5845	-0.776506	-0.844103	-1.03764	-1.43692	-1.5911	-0.913321	-0.394882	-1.77521	-2.65646	-2.24207	-2.94599	-0.525277	-1.59982	-2.75924	-1.23959	-0.623199	-2.29211	-1.08379	-3.64997	-2.74771	-3.42119	-0.656636
719	2.53234	-3.10232	2.53754	1.03258	2.83824	0.0502176	1.20382	0.690606	0.641525	-0.367634	1.19376	1.02028	1.72981	1.0373	2.0656	0.878289	2.53309	1.86623	1.15838	1.77974	3.18105	0.763051	1.8903	1.26163	3.49652	1.33902	2.85011	1.26982	1.29735	0.730362	1.65522	2.21298	0.231349	0.455166	0.913331	1.16229	2.2996	2.35271	1.65881	1.76952	0.445047	1.65125	1.59684	0.731251	0.516606	1.79062	2.10419	1.06833	1.20237
720	-0.559619	1.04881	-0.413166	0.648454	-0.312232	0.572751	-0.725799	-0.176346	-0.229633	-1.04325	-1.06014	0.240481	-1.062	-0.337628	-0.723288	-0.0930171	-0.667777	-0.22411	-0.568545	-0.0190368	-0.340569	-0.468189	-1.08077	0.379611	-0.186803	0.910697	-0.309058	0.821861	0.050045	-0.127527	-0.285835	0.127978	0.125495	-0.543326	-0.284725	-0.380401	-0.289887	-0.438147	1.59808	-0.621341	-0.622682	0.146077	0.61157	-0.121555	0.285247	-1.09692	-0.614674	0.294016	1.01052
721	2.0983	1.86922	2.05573	1.71724	2.2846	1.25376	1.93859	1.34797	2.2135	1.91281	1.88033	1.10018	1.69097	1.45054	1.94824	1.7224	1.7885	1.53333	1.98015	1.65734	1.89348	1.25166	1.88288	1.40274	2.28732	0.967763	2.25915	1.24478	2.56384	1.63674	2.04886	1.9114	0.849339	1.52001	1.31857	1.52274	2.10128	2.00613	1.63554	1.6638	1.16539	1.59536	1.91079	1.97934	1.73685	1.3634	1.10049	1.58653	1.31874
722	2.71462	2.12468	2.47139	3.49182	2.41492	3.48204	2.04299	3.35468	2.64987	1.905	2.76596	2.90048	1.90953	3.44919	1.89251	3.61683	2.45526	2.58401	2.84313	3.19471	2.5067	2.55147	2.53428	3.84001	2.73791	3.8104	2.75161	3.61024	3.13031	3.3905	2.20112	3.30939	3.45388	4.21514	2.58901	2.01547	2.31191	2.19471	4.22682	2.17382	2.25142	2.86394	3.65161	2.13335	2.52058	1.82601	2.13694	2.65231	3.39815
723	0.471873	0.525271	0.61839	1.38851	0.249738	1.09334	0.0916071	0.929294	0.352664	0.29982	1.20666	0.416313	-0.0192471	1.07888	-0.135382	1.03923	0.442033	0.0193043	0.709421	0.691703	0.219118	0.314563	0.654235	1.43792	0.602286	1.54426	1.17651	1.94567	0.805693	0.244615	0.0902667	1.11313	1.78715	0.65176	0.236674	0.491473	-0.147579	0.197135	1.22949	0.0275536	0.965054	0.565735	1.60587	-0.900752	0.834671	-0.437644	0.311325	0.293279	2.63398
724	-0.820985	-1.4104	-1.54509	0.330525	-0.935067	0.089735	-2.96755	-2.51437	-2.13349	-2.4856	-3.8253	-0.324693	-1.31964	-2.82501	-1.58944	0.290268	-0.852431	-0.375794	-1.1338	-0.108253	-0.588617	0.125388	-1.2247	-0.217179	-1.04091	0.202076	-0.899324	0.941787	-0.891737	-1.84334	0.0539966	-1.00627	1.18994	-2.54249	-1.02167	-3.00662	-0.832385	-1.25562	-0.256846	-1.63825	-0.335901	-0.470908	0.586957	-1.10416	-0.686482	-2.07911	-0.804865	-0.759674	1.5328
725	5.69682	7.9336	5.83169	6.79002	5.98162	6.89037	5.65315	6.19964	5.45865	5.67415	5.74196	6.94127	5.29382	6.27781	4.69935	6.46321	5.71316	6.03123	6.2266	6.64805	5.59177	6.11435	6.08605	7.80335	5.78293	6.80065	6.05163	6.46796	5.99342	6.14741	5.36084	6.33462	6.89663	7.81856	5.90085	5.31909	5.39757	5.80367	6.53557	5.29199	5.96373	5.71021	6.55694	5.25353	5.7981	4.7508	5.1775	5.65641	6.55563
726	-1.38378	-1.29069	-2.65783	0.129161	-3.019	-0.953262	-3.6782	-1.53815	-1.55743	-2.40806	-1.75109	0.0851974	-1.78898	-1.61929	-2.45737	-1.40627	-3.81818	-1.87082	-1.88257	0.283822	-1.67433	-2.03182	-1.26852	-0.608899	-1.2644	-0.902128	-3.54158	-1.05114	-1.31537	-2.56505	-2.10858	-2.47118	-1.49464	-1.00898	-3.10945	-3.13154	-1.46788	-2.87733	0.0050745	-2.20518	-0.409734	-2.8066	-1.1301	-1.95806	-2.34634	-2.54338	-2.7876	-1.88964	-0.976007
727	2.98472	3.92076	2.44754	3.21988	2.50094	3.49228	2.10129	2.36963	2.64256	1.80039	2.13907	3.47048	2.40998	3.01481	2.23348	2.88044	2.64926	2.26662	2.64435	3.2667	2.75922	2.27829	2.36186	2.89808	2.53861	3.34062	2.57096	4.19318	2.57489	3.00335	2.04628	3.0326	3.15254	3.27747	2.1522	1.76128	2.68099	2.41099	4.15302	1.70952	2.69776	2.90445	3.71602	2.11772	2.41168	1.93026	2.14661	2.50238	3.66925
728	5.356	7.54467	5.74404	6.95571	5.63442	6.5889	5.63443	6.47303	5.7257	5.76329	5.48201	6.39323	4.89971	5.76438	4.30501	5.91034	5.44298	5.82558	6.65706	7.00465	5.06414	5.32904	6.46601	7.13073	5.30918	5.67086	5.84432	6.30722	5.56341	6.38488	5.41375	6.13457	6.80083	6.26528	6.02303	5.51954	5.04112	5.82755	6.70941	5.23617	5.99015	5.89356	6.46677	5.20368	5.92706	4.15153	4.9202	5.507	6.30247
729	1.36613	-0.483124	1.32735	0.615519	1.57034	0.296885	1.22682	0.82375	1.25261	0.780967	0.779157	-0.169717	1.2984	0.442926	0.64898	0.810087	1.1941	0.920141	1.15861	0.975883	1.31513	0.538453	1.38313	1.5039	1.52858	0.742854	1.18876	0.432845	1.12385	0.472089	0.876054	0.840643	0.780901	0.639028	0.5291	0.884936	1.50688	1.42463	0.384572	1.10051	0.563478	1.21752	0.861643	0.888955	0.710945	0.668943	0.769361	1.19704	0.676177
730	4.00304	4.2814	3.56176	4.53552	3.8621	4.84799	3.1233	3.8109	3.71576	3.06466	3.81748	4.54193	3.37567	4.06828	3.17032	4.11333	3.36089	3.51107	3.92065	4.38956	3.76584	3.27796	3.72051	4.87569	3.83847	4.66923	3.84269	4.96267	4.05525	4.32183	3.28047	4.49544	4.10566	4.66365	3.19715	3.0347	2.9139	3.33541	4.74523	3.17443	3.51771	3.92393	4.91193	3.60573	3.8367	3.39862	3.39375	3.62895	4.76025
731	-1.55036	0.102513	-3.27665	-0.499499	-2.90082	-0.554299	-1.1388	-0.677997	-0.393947	-2.83662	-2.78168	-0.630756	-1.20177	-1.41745	-2.2374	-1.7551	-3.72267	-1.05423	-2.23209	-1.0583	-2.40594	-4.26123	-3.16463	-0.93899	-1.19185	-1.14115	-2.12476	-1.02453	-1.06372	-1.42822	-1.64687	-1.67825	-2.60701	-1.31103	-1.1638	-2.80963	-2.94921	-2.39521	-0.867085	-2.0143	-0.437708	-2.39495	-0.553069	-3.39599	-1.23035	-2.89456	-2.39795	-0.623012	-0.657788
732	-0.0357089	-2.44609	-0.0896535	-0.690653	0.0879245	-0.66554	-0.406345	-1.13289	-0.235575	-2.27043	-0.518725	-0.97997	-0.25258	-0.262029	-0.252545	-0.446243	-0.471295	-1.0777	-0.13792	-0.186268	-0.295387	-1.75521	-0.0386057	-0.321597	-0.219771	-0.264682	-0.314509	-0.645175	0.569406	-0.957093	-0.148064	-0.189767	-0.683311	-0.271147	-0.738656	-0.70952	0.0675001	-0.245014	-0.391018	-0.713124	-1.24412	-0.336857	-0.393761	-0.303741	-0.703989	-0.994981	-1.03488	-0.446392	-0.494376
733	-0.666499	0.539125	-0.587453	0.412308	-2.36211	0	-3.23344	-1.02345	-0.241899	-0.709194	-2.80477	0.0997658	-1.40856	-0.264367	-1.14113	-0.204157	-0.0627279	-0.555057	0.00109053	0.096684	-2.62917	-0.75491	-0.309831	0.0515571	-0.849322	-0.0365572	-0.411593	0.990528	-0.0798206	-0.156119	-2.95447	-0.0560608	-0.0593777	1.05923	-0.717003	-2.97782	-0.935823	-0.646913	1.67551	-1.0092	-0.384139	-0.396418	0.716256	-0.534245	-0.419999	-0.982764	-0.785522	-0.00886869	0.670959
734	-3.1418	1.60932	-0.41413	0.232685	-2.68418	1.05885	-1.80126	0.344378	-2.40326	-3.57586	-2.0297	-1.77699	0.861279	0.738929	-2.91852	0.41716	-0.167079	-0.802186	-0.526364	-0.421723	-2.68828	-2.22963	-0.245934	2.29091	-2.5566	0.550336	0.0236316	3.46338	-0.10893	-0.680838	-2.79814	-0.843907	1.32071	-0.94548	0.211251	0.340881	0.170041	-2.48143	-0.619863	0.612926	0.0263643	0.516744	5.10068	-3.48389	-1.92157	-2.00987	0.0799627	-2.93177	0.463048
735	0.504657	-3.26851	-0.174007	-0.691641	-0.0721097	-0.870081	-0.112923	-0.634696	0.840189	0.401472	-0.249789	-1.03087	-0.29301	-3.12695	0.24687	-1.63165	-0.247905	-0.797415	0.657375	-1.22762	0.199164	-2.43749	1.171	-0.370125	-0.183413	-0.0756369	0.0102162	0.540313	0.213356	0.533673	0.731729	0.916149	0.191857	-0.444054	-0.930583	0.372782	0.137122	0.833797	-0.251997	0.264602	-0.19797	-0.189344	-0.683909	-0.126263	-0.58687	0.590109	0.0906944	-0.0361171	-0.443751
736	-0.604063	-1.30484	-0.942107	-0.358979	-1.41859	-0.724994	-1.37116	-0.355101	-3.14327	0.111811	-0.362864	-1.12689	-2.54358	-0.103092	-1.78382	-0.319837	-1.54348	0.0708876	-0.858716	-0.0324016	-1.32402	-0.892843	-1.4668	-0.106147	-0.964296	-0.136668	-0.988107	-0.194732	-0.953974	-0.791985	-2.36423	-0.711733	-0.543927	-1.02264	-1.01457	-2.08209	-1.41656	0.668118	-0.386729	-2.19745	-0.703896	-0.098484	-0.280808	-3.1712	-0.683657	-1.86901	-1.79736	-0.936291	-0.198771
737	-0.2882	-1.29689	-0.756417	-1.23356	-0.723273	-0.775409	-0.405725	-0.68788	-0.0968285	-2.38423	-0.761268	-1.97348	-0.947423	-2.5939	-0.206953	-3.60811	-0.272459	-0.67905	-0.217538	-1.12377	-0.459075	-2.64627	-0.292507	-0.996367	-0.624703	-2.64316	-0.927045	-0.873519	0.646295	-0.525105	-0.627911	-0.654653	-1.16102	-1.08087	-0.913379	-0.64629	-0.408381	-0.270288	-0.712603	-0.484206	-0.427347	-0.726981	-0.89798	-0.390558	-0.802853	-0.826449	-0.852445	-0.801259	-3.49098
738	-1.48566	5.26669	-1.15364	0.4164	-1.6351	-0.162661	0.475124	-0.586687	-0.461598	1.27545	-0.124263	-0.3652	-0.603243	-2.84994	-1.6629	-1.0775	-3.30191	-1.40899	-1.5908	-0.688029	-0.446777	2.32337	-1.1485	-0.579937	-1.40713	3.3723	-0.727423	4.28739	1.69559	-0.695974	-0.564838	-0.480181	3.82938	-2.75361	-0.949111	-0.41191	-0.973474	-0.969582	-0.973459	-0.694154	1.31263	-0.205233	2.00021	-0.224572	-0.287239	-2.66486	-2.47086	-2.09096	-1.91468
739	-1.72427	-0.452669	-1.6639	-1.69739	-3.36184	-0.728528	-2.58651	-1.77776	-1.61368	-2.11253	-1.93409	-0.769748	-3.19281	-1.58204	-2.77077	-1.69143	-2.86757	-1.89181	-2.72646	-2.13177	-2.82847	-1.7066	-3.36163	-1.99872	-2.03789	-2.90139	-2.0527	-1.11005	-1.5731	-1.21945	-2.66098	-2.47986	-2.56591	-3.00807	-1.59771	-2.04168	-3.26996	-1.74032	-1.4673	-3.58268	-1.78026	-2.07935	-2.19253	-2.26081	-2.07782	-2.73779	-2.07004	-2.46295	-2.16763
740	5.48619	5.78239	5.43594	6.43601	5.57505	6.74779	4.82233	5.41426	5.4619	4.56434	5.25883	6.31693	5.09809	6.00522	4.59973	5.93996	5.30938	5.22033	5.60951	6.38241	5.50799	5.07343	5.3804	6.3299	5.59874	6.37791	5.43465	7.2586	5.74103	5.9244	5.15575	6.10868	6.24734	6.60348	5.07868	4.61316	5.33787	5.04596	7.06532	5.19476	5.5494	5.77205	7.04378	5.30785	5.46377	4.60146	4.49018	5.76274	6.81217
741	0.0142207	0.0194025	-0.0681005	0.788639	0.474472	1.73915	-1.18721	0.193665	0.287452	-0.946173	0.373759	0.529326	-0.0462112	1.31523	-2.37185	1.72426	-0.98123	1.09927	0.41389	0.439368	-0.834703	0.392235	-0.245934	1.65066	-0.592438	1.54532	-0.794966	1.31878	0.940631	0.965514	0.0593324	1.1836	1.59737	1.67907	-0.710969	-1.01789	-0.744684	-0.257825	2.86013	-0.381072	-0.036478	0.544395	1.46641	-0.000536919	0.30919	0.380908	-0.707655	0.295047	1.13997
742	5.71369	3.19595	5.60071	5.20672	5.61276	4.63847	5.17165	4.85845	5.09575	4.46775	4.86104	4.50851	5.14182	3.46508	4.87761	4.37685	5.37228	5.02615	5.62518	5.38098	5.2735	4.06251	5.79495	5.44134	5.18285	4.15078	5.98415	5.03733	5.60145	5.04907	5.04331	5.52301	5.00831	5.21124	4.59654	5.07084	5.50418	5.65783	4.85252	4.86134	4.59815	4.85414	4.32292	4.73304	4.71342	4.51009	4.62806	4.85609	5.31736
743	-1.76463	-0.160087	-0.806821	0.469477	-0.783115	0.695132	-0.826947	-0.0661068	-0.536154	-2.45701	-1.06676	0.513089	-0.845378	-0.255424	-0.770169	-0.335754	-0.614244	-0.384007	-0.655223	0.352528	-0.795553	-0.700005	-0.285635	0.609258	-0.887055	-0.305625	-0.717913	0.698084	-0.632475	0.732801	-0.851243	-0.512644	0.438543	1.1645	-0.0825329	-0.810383	-0.699397	-0.549137	0.855959	-0.888412	-0.349347	-0.0529556	0.441282	-0.873357	-0.276603	-2.1947	-0.31518	-0.0342393	0.725451
744	0.774908	1.84941	0.767126	1.64708	0.554089	1.96323	0.81659	1.09748	1.02518	0.411354	0.840845	1.48486	0.464271	1.42793	0.288077	1.60067	0.725789	0.687308	1.74828	1.64503	0.722157	0.645303	1.51799	2.10857	0.999605	1.98723	0.781834	1.79046	0.990403	1.55602	0.55035	1.251	2.11755	1.87373	1.00866	1.00571	0.475131	1.02182	2.75822	0.676408	1.33472	1.03139	1.72901	0.712798	1.238	0.16698	0.510183	0.716312	1.90705
745	2.94221	3.54316	3.27853	4.38652	3.2225	3.78777	2.63227	3.67414	3.58759	3.75503	3.26398	4.09413	2.95112	3.28902	1.64286	2.56945	3.19955	3.16513	2.6181	3.9415	2.77703	2.84648	2.48757	4.16914	3.47035	2.73027	3.52653	3.28835	3.39192	4.4236	2.64958	2.94007	2.67249	1.98923	3.17228	2.05247	2.82927	2.31279	3.35002	3.16757	3.45738	3.5342	3.75529	2.75749	3.26358	2.77791	3.13341	3.11268	3.67013
746	0.266	0.796684	-0.0878482	0.998078	0.167054	1.0656	0.113874	0.373731	-0.0798359	-0.12313	-0.180099	1.27989	0.0221815	0.498762	-0.37254	0.310572	-0.0987101	0.443172	0.227033	0.767096	0.256955	-0.0299449	0.255714	0.799915	0.25225	0.526849	0.151047	0.655704	0.419568	0.617253	-0.281074	0.38927	0.251399	0.000580788	0.222881	-0.522519	-0.105167	-0.0912237	1.086	-0.468457	0.0408068	0.423415	0.539286	-0.0264511	0.322062	-0.626854	-0.339113	0.294226	0.919895
747	3.79488	4.34956	3.662	4.85018	3.86235	5.03355	2.87477	3.64089	3.80447	2.96798	3.58144	4.45621	3.07543	4.06738	3.02315	4.10839	3.34805	3.80068	3.72622	4.15142	3.445	3.10747	3.54298	4.71817	3.61496	4.28227	3.62209	5.10879	3.63799	4.30644	3.11845	4.28145	3.97156	4.29369	3.20633	2.6611	3.52134	3.27811	4.89436	3.1851	3.03678	3.60344	4.89012	3.4815	3.87558	3.05722	3.39633	3.67414	4.6858
748	0.115491	1.93261	1.6791	1.70269	0.934968	2.36327	-2.49604	0.987851	1.07489	0.227741	1.35435	1.48608	1.69064	1.74941	-2.45013	1.76837	-2.46157	0.88267	1.12079	1.0767	-0.0601749	1.05787	0.630206	1.1817	1.48204	1.85942	0.515231	2.10194	2.52233	1.82985	1.72605	0.8963	1.38902	2.19161	1.04676	0.0426903	-1.2706	0.555885	2.56289	0.0878878	0.310607	0.132342	1.86943	1.17874	1.10329	0.856112	0.914093	0.800396	1.87011
749	2.56106	0.83339	3.52004	3.027	3.86754	2.32913	3.35985	3.09634	2.96804	2.97528	3.15123	1.39314	3.1225	1.06478	2.553	1.99686	3.13236	2.22029	3.9976	3.9393	3.10196	1.40809	4.3207	3.20916	2.56644	1.52818	3.85208	2.00474	3.03331	2.87553	3.05633	3.38156	3.11793	2.48398	3.30015	3.27446	3.23471	3.66184	1.89116	2.79953	2.70017	3.18374	2.19366	2.49566	2.80297	2.414	2.44733	2.44042	2.20654
750	0.877586	-0.529738	0.918892	0.402688	0.580521	0.890944	0.47096	-0.246187	0.416165	0.975627	-1.47175	-0.520764	0.557568	-3.09067	-0.237138	-1.70975	1.07096	0.280622	0.921743	1.22474	-0.314178	-2.32974	0.839802	0.108671	0.0970554	-2.36823	1.53238	-1.51186	1.1358	1.06796	0.210608	0.313181	-2.55349	-0.318637	0.291473	-0.993473	0.996565	0.51469	-2.85132	0.134983	-0.262911	0.982039	-1.36166	1.02162	-0.429599	-0.181815	0.144729	0.691175	-0.296122
751	-1.5615	-1.25289	-1.32224	-0.718038	-2.12829	-1.00157	-2.49257	-0.775508	-1.77059	-2.08285	-1.61567	-1.26925	-1.12396	-1.69207	-1.67458	-1.59866	-2.16543	-2.42562	-1.86565	-1.09151	-1.5732	-2.1211	-1.31918	-1.34096	-1.34766	-1.34976	-3.36347	-0.859682	-1.45601	-0.735639	-1.32344	-1.24714	-0.833006	-1.34221	-1.30411	-2.9621	-2.54897	-2.01787	-0.892028	-2.80395	-1.65751	-1.58432	-0.867744	-2.976	-1.48779	-2.65053	-2.21364	-1.80979	-0.366952
752	0.678352	-1.31067	1.51508	0.252289	1.85758	0.345654	1.91413	0.812877	1.19473	0.301054	1.55144	-2.89049	1.44857	0.0326805	-0.125998	0.600798	0.507431	-0.023509	2.4282	1.6905	0.537593	-1.38682	2.68542	0.578763	-0.997864	1.74261	1.5067	1.29862	1.23454	0.451054	1.78727	0.760846	1.24386	0.482049	0.70495	1.68738	0.997478	2.00041	-0.896691	1.38567	0.156467	0.621296	0.96928	0.252801	1.15791	-1.11483	-1.32515	0.220477	0.827701
753	1.69991	-0.52991	1.41478	0.920981	1.50748	0.821484	1.12305	0.646417	1.2737	1.02096	0.920958	-0.396852	1.11294	0.296349	1.0971	0.347061	1.33252	1.07298	1.44005	1.6953	1.52321	0.140345	1.66272	1.20254	1.24052	0.401649	1.4036	0.646668	1.63379	1.25568	1.22946	1.65407	0.975704	0.652769	1.17326	1.01364	1.29964	1.1238	0.619598	1.22065	0.770048	1.30776	0.345243	1.01274	0.945307	1.08427	0.705726	1.34275	0.474009
754	-0.00986147	-2.92739	0.728419	-0.632884	0.337429	-0.407862	-0.198524	-0.540797	0.221798	-2.4483	-0.501309	-2.46425	-0.136168	-2.66067	0.102695	-2.52938	0.0464926	-0.517858	0.145794	-0.46817	-0.586214	-1.82819	-0.868294	-0.57383	-0.370394	-1.59315	0.717162	-0.707162	1.88093	-0.282076	0.638733	0.0224771	-0.362013	-0.767613	-2.94649	-0.702724	1.0712	0.0501423	-2.14244	0.0482435	-2.33926	-0.834474	-0.511514	-0.466364	-0.697307	-3.07799	-0.740155	-0.235487	0.0193338
755	2.89236	1.42556	2.5978	3.62344	2.68358	3.96399	2.23369	2.75267	3.00728	2.12113	2.91194	3.48981	2.21571	3.17001	2.45183	3.27566	1.98493	2.58757	2.84803	3.21758	2.61451	2.12061	2.71852	3.98174	3.16548	3.63792	2.91142	3.9776	3.04808	3.34703	2.34919	3.50101	2.93356	3.32848	2.32062	1.8042	-0.113263	0.723904	3.04019	2.17568	2.64776	2.93107	4.13074	1.78467	2.84871	2.36108	2.47669	1.29276	2.64006
756	0.0611386	0.365269	-0.563501	0.0865221	-0.517284	0.100677	-0.60582	-0.289844	-0.155768	-0.277791	-0.0504065	0.209805	-0.900761	0.319798	-0.679007	1.91786	-0.10973	-0.178828	-0.670694	0.497982	-0.148007	0.213877	-0.253569	0.603036	-0.260257	0.643055	0.310092	1.01334	0.193019	0.448009	-3.28576	-0.0283813	-0.0253649	0.829427	-0.412669	-0.94108	-0.554508	-1.26755	-0.516429	-0.869844	-0.593411	-0.282751	0.219275	-0.530423	0.550176	-0.463964	-0.817598	-0.658984	0.0200472
757	1.07318	1.75166	0.807647	1.52907	0.925517	2.76737	0.612351	0.765433	1.22842	0.568767	1.15904	1.56434	0.660571	1.77867	0.641017	1.29915	0.805402	1.09438	1.55416	1.64051	0.989625	1.17709	1.14747	2.59661	1.09955	2.21474	0.965661	2.18693	1.07681	1.34573	0.419707	1.19993	1.76847	2.18621	0.756755	0.299275	0.928637	0.926528	3.14014	0.714891	1.71928	1.36854	2.5602	0.970034	1.38634	0.624136	0.797529	1.10429	1.67967
758	1.1702	0.154088	1.03707	-0.0953999	0.459501	-2.64856	1.08398	1.1833	1.11383	-2.64118	0.368957	-2.64396	1.17495	-2.53165	0.0953088	-4.19389	0.804295	-0.0364466	0.885746	-1.44829	-2.27726	-2.10573	1.48679	0.118884	0.0882978	-2.5896	1.70057	2.76194	0.508972	0.645949	0.445503	1.52845	1.38586	-0.234107	-2.97798	0.712934	0.0080843	-2.068	0.37944	0.973508	-3.11017	1.55134	-0.389466	-2.64209	-2.30669	-0.696495	1.1612	-2.65594	-2.35848
759	0.987324	1.37302	1.30524	1.95818	1.30772	1.59774	1.59441	2.09845	1.46294	0.727256	1.23059	1.85141	0.831466	1.73771	0.155886	2.19683	1.75048	1.94887	1.43549	1.98535	1.08549	2.21595	1.57371	3.45299	1.3831	2.41721	1.62412	2.19873	1.33544	1.57417	0.733796	1.55258	2.38191	1.61127	1.07258	1.05152	1.30196	1.30672	3.1524	1.34101	2.1197	1.43165	2.22436	1.08802	1.18683	0.381179	0.953959	1.43716	1.90191
760	-0.270511	1.38706	-0.634182	1.1566	-0.157952	0.843003	-0.386057	0.644594	0.0111952	0.0114756	0.176008	1.42518	-0.396715	1.46398	-0.430502	0.392112	-0.310205	0.0297241	-0.724079	0.850764	-0.332093	-0.305289	-0.314708	0.504793	0.163512	0.713974	-0.23532	0.227861	0.522873	0.539015	-0.399282	0.115438	-0.482649	2.62669	0.351067	-0.976573	-0.147469	-0.537036	1.89645	-0.536737	0.0593929	0.257972	0.708282	-0.0218716	0.492521	-0.815902	-0.523558	0.0339503	0.942219
761	-1.18854	-0.336097	-1.41357	-0.408662	-1.12635	0.568442	-1.38876	-0.657189	-0.340608	-0.918174	-1.45486	0.44448	-1.37259	-0.151312	-1.52699	-0.557085	-1.5948	-1.21257	-0.595634	-0.101248	-0.656264	-1.2684	-0.488245	0.36181	-0.968622	0.110762	-1.25649	0.0975399	-0.547002	-0.446677	-1.47638	-0.392319	-0.225216	0.446425	-1.2652	-0.856946	-1.07115	-1.25194	0.627208	-0.929713	-0.829308	-0.199243	-0.116034	-1.43731	-0.873734	-2.48947	-1.3402	-1.10434	-0.223068
762	0.610115	-1.33836	0.486478	0.132659	0.470037	-0.49677	0.110234	-0.205699	0.398485	-0.300467	-0.0336542	-0.653598	0.198051	-0.101823	0.432869	0.0801635	0.346268	0.133337	0.253583	-0.0522542	0.267858	-0.5976	0.184587	-0.0650468	0.0993109	-0.456222	0.288918	-0.0625353	0.109644	0.025383	0.304988	0.195293	-0.0379305	-0.132784	-0.15256	0.153075	0.458768	0.267469	-0.439653	-0.08811	-0.490129	0.191244	-0.273916	-0.038846	-0.435999	-0.217971	0.0274887	0.301538	0.0414143
763	2.3433	4.54045	1.5172	2.92243	1.87145	2.95104	1.68434	2.26731	1.17996	1.3954	1.51563	2.42472	1.56074	0.921689	0.712994	1.28738	1.55296	1.63641	1.65731	2.6721	1.54461	1.66953	2.21565	2.85875	1.20695	0.71049	1.9157	2.57859	1.70065	2.87249	1.45315	2.41603	2.23385	1.10988	2.03392	1.32015	1.56541	1.71567	2.74909	1.24303	2.1937	1.74249	2.33349	1.65181	2.33942	1.19143	1.52753	2.12955	3.1621
764	0.401389	1.55929	0.803998	1.19991	0.797721	1.19009	0.961549	1.32768	0.733524	0.880747	0.645314	0.900097	0.804003	1.61948	-0.199543	1.28972	1.3276	1.06344	0.729686	1.02243	0.154747	1.93722	0.600767	2.44852	0.62124	1.19152	0.965753	1.63777	1.03801	1.02296	0.711154	0.859387	1.1502	0.991258	0.545791	-0.018178	0.121249	0.449613	1.30724	0.689577	1.13015	0.461891	1.97242	0.605284	0.793631	0.289665	0.441446	0.81149	0.619237
765	-2.46392	-0.434169	-2.48767	-0.670033	-1.93659	-0.219934	-2.01696	-1.47065	-0.975579	-0.212651	-3.11655	-0.388331	-2.82824	-2.89826	-2.72222	-2.48364	-1.99201	-1.04966	-1.23826	-0.412057	-2.38565	-3.04866	-3.69718	-0.811531	-1.11834	-2.76276	-1.05173	-0.757326	-2.97091	-1.22767	-2.96831	-3.4746	-1.31794	-1.46771	-1.60646	-2.50613	-2.54646	-2.4471	-1.0288	-2.08835	-1.2901	-0.647119	-0.285378	-2.68416	-3.07285	-2.78733	-1.84359	-0.780883	-0.617707
766	-1.55084	-0.201364	-1.26429	-0.856106	-1.10156	-1.07914	-1.56459	-0.627086	-1.11736	-1.08941	-0.0351553	-0.915666	-3.87741	-0.701179	-2.17723	1.01098	-0.949179	-0.128159	-0.960103	-0.591467	-1.43548	-0.242563	-1.05326	0.390954	-1.08706	-0.38438	-1.15487	-0.261209	-1.34756	-0.713237	-2.01309	-1.0309	0.491508	0.170705	-0.851095	-1.47514	-1.21192	-0.98298	1.4037	-1.76185	0.2046	-1.00776	-0.213524	-2.32994	-0.792998	-2.50189	-2.88723	-0.821203	-0.648482
767	2.25731	2.54717	2.07486	2.84982	2.05501	3.40671	1.90822	2.3083	2.38798	1.71025	2.18674	2.8443	1.81431	2.80753	1.98261	2.74756	1.93919	2.22713	2.81595	3.13299	2.06321	2.09608	2.53068	3.00349	2.09765	3.00021	2.27795	3.34548	2.49948	2.78092	1.77136	2.69161	3.22359	2.50423	1.97482	1.68955	2.07888	2.09737	3.40821	1.91701	2.73645	2.44622	2.83976	1.69971	2.1416	1.34465	1.68474	2.14795	3.13417
768	-0.535532	-0.897305	-1.06409	-0.26812	-1.17317	0.258523	-2.99287	-0.777635	-0.905669	-3.32297	-0.695073	-0.0993013	-1.13279	0.0633316	-2.80516	0.529252	-1.90594	-0.743396	-0.490104	0.11145	-1.38605	-0.545294	-0.363702	-0.191529	-0.949766	0.859076	-0.625958	1.3369	-0.263926	-0.215074	-1.79236	-0.307424	0.540801	-0.211348	-2.77804	-2.43925	-3.33627	-2.60231	-0.0576744	-2.90395	-3.11404	-0.436809	0.665471	-0.642159	-0.164082	-1.41704	-1.98758	-2.67884	0.97661
769	-1.70664	-1.54015	-1.82045	-0.509551	-1.5593	-1.03586	-1.87631	-0.387569	-1.62895	-1.38726	-1.40577	-0.859977	-1.83962	-0.829499	-1.78205	-1.72253	-1.63566	-1.23482	-1.92192	-0.622692	-1.7213	-2.01276	-2.50296	-1.09714	-1.18511	-1.3856	-2.01698	-1.97419	-1.47455	-0.610038	-2.94094	-1.85597	-1.47734	-2.26515	-2.06935	-3.48811	-1.53833	-1.82497	-0.782486	-1.64575	-1.07208	-1.14476	-0.768949	-1.97572	-1.36687	-2.37081	-1.86259	-1.43426	-0.743737
770	1.34343	2.01236	1.48071	2.39713	1.74586	2.63387	0.667457	1.68931	1.11093	0.018013	1.33964	2.3937	1.01997	1.72033	0.765398	1.79655	1.57159	1.72367	0.996051	2.14181	1.41472	1.08101	1.11901	2.75548	1.53075	2.19993	1.49015	2.87329	1.85329	2.06741	0.914024	1.8725	2.08266	1.73363	1.11086	0.531336	1.12676	1.09616	1.96382	1.1792	1.029	1.67696	2.81905	1.35846	1.38848	1.06339	1.22299	1.01963	2.00744
771	1.44199	2.58367	1.93022	2.24732	0.574029	2.77016	2.63563	2.81593	2.56746	2.27882	2.60915	2.54168	1.74496	2.38118	1.79072	3.20909	1.41114	2.09485	2.58951	2.08172	1.48121	2.84074	2.44128	3.09647	2.89538	3.46292	2.34162	3.5603	1.62941	2.9826	1.8048	2.55987	2.67243	2.03585	2.49982	2.40678	1.78782	2.79178	2.55899	2.5333	4.15211	1.62745	2.94075	2.45027	2.65418	2.09008	1.99116	2.27263	2.80512
772	3.4951	1.77528	3.41877	2.53482	3.63626	2.58959	2.84917	2.49254	3.11695	1.6466	3.16847	1.87153	3.24907	2.4385	2.44149	2.69964	3.12831	2.82121	3.17693	3.2046	3.29438	2.33204	3.25356	3.29393	3.55886	2.61438	3.48612	3.04694	3.529	2.86197	3.18813	3.76151	2.54439	3.05821	2.19271	2.57125	3.32224	3.29557	3.24398	2.7975	1.56155	3.06432	2.57147	2.51754	2.22163	2.60301	2.8222	3.17433	2.5309
773	4.24586	4.18747	3.97682	5.00988	3.98715	5.24652	3.53312	4.01706	4.19568	3.57305	3.91712	4.84728	3.64466	4.45068	3.34542	4.54649	3.73807	4.0862	4.19574	4.321	3.72694	3.53237	3.88839	5.02632	4.11813	4.69621	4.08613	5.40363	4.15183	4.61165	3.46376	4.51278	4.41272	4.84997	3.74277	3.27061	3.7774	3.73876	4.96008	3.6274	3.98935	4.02185	5.06767	3.90297	4.28977	3.56326	3.81971	4.14528	5.07097
774	1.27704	0.823415	1.82622	2.19257	1.77651	2.73062	2.11106	2.39608	1.92244	1.96877	1.88309	2.52057	1.2001	2.56105	0.817404	4.08814	1.43654	2.03578	2.26163	2.17528	1.83582	1.47044	2.35207	4.13427	1.9099	4.14952	1.68636	3.80526	1.74551	1.92017	1.70956	2.51663	3.60297	2.86865	1.83804	1.88561	1.39495	2.33574	3.91684	1.76126	2.60075	2.1043	3.75406	1.06481	2.63215	0.566103	0.992876	1.61524	2.08698
775	-0.0502505	-1.64175	-0.0206971	-2.81137	-0.0476689	-0.797998	-0.385135	-2.61308	-0.616019	-3.55631	-0.798621	-2.16577	-0.179914	-2.36706	0.0927978	-2.43899	-0.121157	0.551425	-1.1942	-1.81177	-0.104191	-2.76509	-0.877454	-0.960159	-0.191165	-0.661478	-0.787526	-0.368953	-0.163013	-0.044445	-0.102527	0.215329	-1.02777	-0.116407	-2.25381	-0.9679	-0.245445	-0.82909	-1.02085	-0.249802	-2.33561	-2.28796	-2.40041	-0.588898	-0.75303	-0.685397	-0.509678	0.543582	-0.392287
776	-0.457329	1.22726	-0.288593	0.395603	0.0124354	0.807748	-0.107563	0.401355	0.145227	0.0603428	-0.397418	0.842082	-0.875626	0.140726	-1.06585	0.195509	-1.5321	-0.341729	0.239205	0.417746	-0.29845	-1.00351	0.318742	1.05353	0.308695	1.2185	-0.0807738	0.454313	0.103288	0.373812	-0.457496	0.18668	0.635095	-0.244815	-0.102562	-1.37388	-2.89231	-1.50004	0.16138	-0.202324	0.312297	-0.048748	0.384042	-1.42915	-0.563899	-1.07251	-0.295695	-1.75765	-1.4547
777	4.23711	4.31143	3.92162	4.69718	4.1949	4.73738	3.74364	4.62202	4.12453	3.57386	4.24035	4.69493	3.72621	4.54805	3.56851	4.28513	4.29314	4.20946	4.24354	4.5177	4.28683	4.89935	4.21229	5.05407	4.26803	4.80665	3.95381	4.88943	4.45696	4.84933	3.56745	4.48244	4.35231	4.59028	4.17159	3.54373	3.86408	3.86123	4.66506	3.71214	4.36927	4.02987	4.65665	4.19288	4.25771	3.59359	3.66181	4.06108	4.70492
778	-1.31965	-2.32514	-1.33165	-1.06609	-2.34549	-0.761352	-1.1926	-0.819034	-0.84025	-2.80084	-2.34296	-0.263846	-2.34129	-0.639647	-2.35848	-0.695245	-2.49451	-0.941911	-0.728413	-1.03677	-3.04635	-0.676119	-0.943699	-0.480287	-1.23031	-0.445642	-1.55175	-0.414191	-2.87572	-1.00012	-0.493825	-1.13923	-0.747007	-0.626327	-2.19504	-3.19347	-2.40254	-0.984344	0.160635	-2.74051	-0.162644	-1.24337	-1.08054	-2.64039	-1.34502	-2.99885	-2.50528	-1.19824	-0.447621
779	2.29583	3.26427	2.02374	2.89158	2.15177	3.3252	1.95079	2.35738	2.01831	1.8883	2.21791	3.11661	1.79175	2.63849	1.71423	2.69922	1.99554	2.2859	2.57277	2.88946	2.24172	1.91335	2.52385	3.28676	2.3976	3.15108	2.39443	3.17286	2.34753	2.64683	1.65633	2.57164	2.96293	3.65884	2.17591	1.82974	2.00017	2.19915	3.43733	1.87817	2.64096	2.4892	2.91968	1.93533	2.55144	1.674	1.95917	2.34409	3.1992
780	-0.945146	-0.16846	-0.763831	-0.33703	-0.844512	-0.54212	-0.995955	-0.691383	-0.827731	-2.14399	-1.7632	-0.128831	-3.39978	-0.69409	-1.08563	-0.500898	-1.10698	-2.58826	-1.19567	-0.366773	-3.31005	-3.02015	-0.758615	-0.110833	-0.951921	-0.237335	-2.97602	-0.399325	-0.412508	-0.400611	-2.22034	-0.901851	-0.225904	-1.09688	-0.641034	-2.60366	-0.902863	-2.11479	-0.0953455	-2.78782	-0.520285	-0.64738	-0.278945	-2.08217	-0.715833	-1.18094	-1.72057	-0.978899	0.204803
781	1.21779	1.4641	0.750705	1.87993	0.724782	1.95731	0.752952	1.71411	1.04547	1.14895	2.3444	1.59154	1.17736	1.99307	0.640254	1.57908	1.04165	1.66517	1.44659	1.975	1.16165	2.70488	1.50989	2.18534	0.950265	2.27418	1.1163	1.61439	1.4659	1.9152	0.711139	1.31987	1.47928	1.47389	1.69813	0.917027	0.952854	1.2687	2.25008	0.834073	1.37505	1.18289	1.81797	2.07784	1.54547	0.506604	0.884112	1.0023	1.89135
782	1.26565	1.49596	-3.0137	1.79659	1.17829	1.88226	-3.10793	0.77844	-0.356206	-2.75518	-2.91301	1.68459	-2.90356	1.49843	0.790042	1.32298	0.937112	1.35708	1.13178	1.51686	0.943838	0.705039	0.926115	1.4142	1.265	1.47071	1.19	2.23608	1.21393	1.35332	-2.12661	1.68263	1.58105	1.50152	0.0293913	-2.62694	-0.845789	-2.59663	2.14295	0.603788	0.816512	1.19519	2.08365	0.742817	1.44018	-2.471	-2.85348	1.27322	2.10841
783	0.363783	1.50616	-2.44351	0.499253	0.106936	0.200097	-2.75624	0.0308704	0.363257	-0.494637	-0.450962	0.597713	-2.69019	-0.14432	-3.05534	0.609654	0.869442	-0.0534229	-0.30356	0.131041	0.556519	1.56754	0.0182838	0.455526	0.0704794	0.188683	0.449193	0.859224	0.171395	0.261395	-2.45924	0.354331	0.809831	0.700524	0.184538	-2.43824	0.296457	0.273495	1.24522	-2.60308	1.5961	0.301296	0.575126	0.268642	0.581306	-3.08891	-1.39918	0.238203	0.628167
784	-0.103778	0.301061	-0.343004	0.608753	-0.535133	0.863298	-0.163338	0.102431	-0.25001	-0.109522	0.0996943	0.514584	-0.533243	-0.165939	-0.213609	-0.435881	-0.377934	-0.0800457	-0.374018	0.360322	-0.449412	-0.454352	0.0148554	0.638972	-0.311573	0.0351877	-0.611415	0.680388	-0.261718	0.751678	-0.473753	-0.45063	0.468839	1.29219	-0.0347576	-0.5589	-0.467896	-0.43686	0.841145	-0.929197	0.0222015	0.0171204	0.705964	-0.692108	0.0987692	-2.29498	-0.222051	0.138493	0.901142
785	0.363933	1.50345	-0.0076232	1.22952	0.264928	1.49561	-0.142082	0.0632668	0.7834	-0.167791	0.176911	1.30666	0.0985136	1.22556	0.292607	1.14798	0.192175	0.47403	0.494246	1.11667	0.44133	-0.146442	0.120114	1.04102	0.515059	2.00831	0.065845	2.05005	0.942323	0.778164	0.0455785	0.810891	1.51622	2.35319	-0.0106688	-0.219734	0.371788	0.213807	3.60807	0.352274	0.643577	1.24994	1.98341	0.190006	0.463567	-0.214693	-0.0549355	0.599937	1.97944
786	-0.583468	-0.429283	-1.57969	-1.7487	-0.690977	-2.26785	-1.30241	-3.48353	-0.753592	-1.07662	-2.62153	-1.66679	-1.86891	-1.78005	-1.63556	-2.82397	-0.231237	-1.57768	-1.09785	-1.89094	-1.78477	-2.82467	-1.15148	-2.47898	-1.61533	-1.81855	-3.08591	-2.98927	0.052496	-2.9095	-0.10712	-1.72331	-1.64268	-2.75111	-2.49943	-2.38929	-0.633551	-0.543004	-2.82399	-1.99756	-2.28508	-1.90445	-1.48663	-1.35077	-2.55466	-2.12577	-2.26985	-2.36897	-2.98158
787	-1.59491	-0.842824	-1.91931	-1.15269	-1.21592	-1.14171	-2.55501	-1.76861	-1.55607	-2.3034	-1.45058	-1.23203	-3.41985	-1.29655	-2.54126	-1.20378	-0.979762	-1.16981	-1.8647	-1.41042	-1.94632	-1.20598	-1.53209	-0.452672	-1.72874	-1.01407	-1.34026	-0.878909	-1.12345	-1.11321	-3.03262	-1.18406	-1.59183	-0.383253	-1.21504	-2.40093	-1.53398	-2.1088	-0.853262	-2.83246	-2.74157	-3.1817	-0.363247	-2.28818	-1.29035	-2.34605	-2.16329	-1.37997	-1.14614
788	0.67334	1.95272	0.688283	1.65058	1.02819	1.90549	0.460122	1.12845	0.447291	0.678104	0.449657	1.96083	0.435197	1.01848	0.389986	0.908589	0.640736	0.638175	1.07952	1.59148	0.764473	0.966088	1.06305	1.89385	0.911221	0.940609	1.00945	1.46563	0.678346	1.00077	0.222561	1.07082	1.61261	1.37026	0.818742	0.494417	0.29116	0.537894	1.62492	0.58401	1.0758	1.25388	1.71811	0.309116	0.737384	0.0868502	0.0513887	0.61903	1.72104
789	3.79376	-0.547878	2.88702	3.36082	3.50064	2.2139	3.15713	2.90953	2.60708	2.2532	2.71052	0.391949	3.01616	1.74198	2.93613	2.39546	3.37261	2.7847	3.33104	3.51457	3.17152	1.37072	3.80823	3.52601	2.34394	2.54948	3.96051	2.31794	3.15946	2.91471	2.93512	3.61821	2.57529	2.86093	2.3043	3.15	3.47211	3.82084	1.99138	2.52493	1.85883	3.26837	2.06511	2.37677	2.64589	2.29194	2.54127	2.47549	2.61862
790	1.77943	-2.33264	1.38636	1.77502	1.24567	1.38386	1.9986	1.55802	1.32117	2.8917	1.98013	-2.62851	1.44856	-3.30634	1.5648	0.758949	1.22183	1.51179	1.92922	3.05839	2.08579	1.36994	2.43267	1.45046	1.24274	1.02567	2.1657	-2.11697	0.977378	-1.81183	1.49973	1.4119	-2.12297	1.79697	3.24405	2.07957	1.4064	1.88543	1.3798	1.61211	1.34121	1.53883	1.13621	-1.86797	0.623502	0.886068	1.86493	2.37631	-2.05641
791	4.50863	6.3435	1.07138	2.80302	3.85912	5.43607	2.68726	4.35211	3.59195	3.37408	3.11447	5.05408	3.51342	3.62079	1.87176	2.52897	3.61237	4.22036	2.86889	4.3703	3.52753	3.13504	3.91394	3.99381	4.35301	3.92391	3.35972	4.73465	2.69644	4.56315	3.4202	4.36976	3.84231	4.14309	4.47839	2.79141	3.4026	2.89119	4.36582	2.76192	2.78319	4.32687	5.26138	2.30187	2.2945	1.83621	2.05694	3.36763	4.2568
792	1.94919	-1.56877	1.69006	0.799011	1.65926	0.570358	0.680302	0.434251	0.92005	0.0987864	0.651731	-0.18108	1.28369	-2.84689	0.912754	-0.246526	1.12841	1.11718	0.77676	0.792731	1.75041	0.0635896	0.834924	0.771756	1.84031	0.0220709	1.29719	1.03182	1.13513	1.41423	0.991937	1.43143	0.887809	0.39447	0.418873	0.610603	1.44703	0.922575	-0.0726175	0.585127	0.00699425	1.37271	0.249876	1.04008	0.0761709	0.939339	1.03452	1.44998	0.673874
793	0.0487647	1.73959	-0.13046	0.715241	-0.0451798	0.184616	-0.552157	-0.181729	0.260556	-0.440843	-0.0703802	0.309557	-0.305524	0.227055	-0.818843	0.323968	-0.262556	0.237391	0.203268	0.719415	-0.348682	0.0691228	0.0557489	1.43914	-0.0818195	0.441884	-0.20528	1.44058	0.553456	0.105681	-0.291948	0.375574	0.549856	-0.302002	-0.0486956	-0.824329	-0.440097	-0.488509	1.30882	-0.325303	-0.39952	-0.0283356	0.794548	0.0840673	0.220448	0.0670252	-0.206887	0.139571	0.774011
794	-2.61454	-0.0870466	-2.64694	0.712144	-2.20215	0.957747	0.719903	0.546409	-0.262326	0.321027	0.228689	0.08111	-3.15544	0.804581	-2.18515	2.14159	-2.81779	-2.64273	1.00497	1.8978	0.352486	-1.08011	1.23196	0.810296	-2.25255	0.283467	0.663679	0.458045	-3.13326	0.54096	-2.88509	0.352935	0.563991	-2.34856	0.664103	0.402623	0.35675	0.944801	-0.00839043	-2.70155	0.895151	0.870217	0.17095	-3.20434	0.771088	-2.05233	0.736882	0.359658	0.165285
795	-0.356091	-0.76951	-0.563884	0.65006	0.0804553	0.623801	-0.479294	-0.240965	-0.217612	-0.472077	-0.117464	0.527454	-1.26755	0.0548124	-0.579145	0.0883775	0.364457	-0.520127	-0.394847	0.581233	-0.283139	0.774492	-0.460443	0.346081	-0.758058	0.0800972	-0.235776	0.370238	0.176586	-0.1481	-0.8382	-0.40068	0.309004	0.674637	-0.390795	-0.612627	-0.469121	-0.848118	0.769177	-0.786695	0.489035	-0.091033	0.641372	-0.648629	0.265998	-2.31975	-0.419231	-0.290694	0.47091
796	-1.00796	-1.26204	-3.29545	-0.408862	-1.28215	-0.878415	-2.46161	-0.580942	0.506947	-2.86995	-2.64253	-2.28551	-2.0298	-2.58181	-3.09851	-1.46646	-2.16043	-0.0662985	-0.636945	-1.01204	-2.06956	-1.28568	-3.42763	-0.773143	-2.87556	-2.71335	-1.99268	-0.721323	-0.822674	-0.395488	-1.14316	-0.00440979	-0.500763	-0.951796	-1.02435	-2.14181	-0.0107222	-2.76006	-0.534245	-2.7964	0.322477	-1.97241	-0.100784	-2.13045	-0.591771	-2.86598	-2.35183	-0.0947213	0.691192
797	-1.46004	0.0234213	-1.67126	-1.03758	-1.61785	-0.327871	-1.92793	-2.31015	-1.30913	-2.13011	-1.53914	-0.175107	-1.74032	-1.22136	-1.53757	-1.52329	-1.63788	-1.0535	-1.62192	-0.985329	-1.62556	-1.83344	-1.78531	-1.02162	-1.57765	-1.10767	-1.60672	-0.259566	-1.28557	-1.07071	-1.80528	-1.48385	-1.62726	-2.07365	-1.83423	-2.24207	-1.28278	-1.80383	0.215732	-2.04595	-1.39778	-1.38586	-0.875592	-1.70708	-1.16047	-2.28953	-1.56109	-0.813149	-0.320322
798	-0.217497	2.12408	0.163836	1.43056	0.219197	1.08991	0.0896559	0.806542	-0.159293	0.834764	0.0209064	1.18053	-0.0323668	0.0465965	0.286315	0.132491	0.0345173	0.301474	-0.185098	0.718842	-0.0808306	-0.166388	-0.0269356	1.2975	0.214787	0.187166	0.154871	0.812085	0.300835	0.435134	-0.317939	0.239524	0.139028	0.884818	0.527191	-0.245821	1.29489	-0.425954	1.12799	-0.0619907	0.430076	0.217834	1.1349	0.193909	0.357685	-0.081008	-0.211164	0.0765634	0.48184
799	0.112907	0.949181	-0.393198	0.523598	-0.347245	1.42478	-0.536268	0.248652	-2.29716	-0.595953	0.0670061	0.993723	-0.450615	0.278708	0.0714221	0.0991101	-0.167469	-0.562042	0.00508738	0.714547	0.333225	-0.279093	-0.107876	1.14377	0.267388	0.519125	-0.107492	1.05517	-0.217789	0.149954	-0.662121	0.335287	0.25373	0.871839	-0.171533	-0.506318	0.118488	-0.23951	1.40992	-0.226748	0.222901	0.583364	0.994423	-0.144587	0.196726	-0.576911	-0.576071	0.305364	1.20063
800	-0.738603	-0.524976	-0.0523295	0.61436	-0.525907	0.0458021	-0.483346	0.13482	-0.237002	-0.375528	0.527521	0.413941	-0.964634	0.130737	-0.896933	0.417025	-0.889519	-0.33556	-0.139801	0.029017	-0.786487	0.111049	-0.14066	-0.199503	-0.308106	0.910544	0.140254	0.67412	-0.631385	0.550388	-0.868701	0.203545	0.0776558	-0.933563	-0.0437241	-0.0797014	-0.501803	-0.495127	0.653011	-0.700202	-0.05513	-0.600062	-0.304485	-0.341228	-0.270512	-1.17947	-0.761886	-0.237077	0.32344
801	4.20361	6.1136	4.29979	5.3024	4.38532	5.1034	4.08571	4.68264	4.47139	4.21183	4.22148	5.23096	3.7914	4.58148	3.16404	5.01935	4.09181	4.4859	4.75123	4.96994	3.95654	4.34664	4.7615	5.64517	4.17965	4.88898	4.61909	5.0557	4.72755	4.72176	4.03038	4.5655	4.98956	4.88485	4.17833	4.01438	4.23802	4.32664	5.7089	3.84818	4.29666	4.3642	5.3738	4.24541	4.37728	3.3105	3.73781	4.39915	5.21413
802	-0.386562	-0.370783	-3.01912	-0.616378	-3.34701	0.107994	-2.79475	-3.17933	-0.627437	-2.43119	-1.05542	-0.392294	-2.81947	-0.830751	-3.29023	-1.06031	-2.15271	-0.379319	-2.32928	-0.474278	-2.56073	-3.02554	-2.80539	-0.678865	-0.188451	-0.0152016	-2.38154	0.102037	-2.23515	-0.228327	-2.43448	-0.0622549	-0.169406	0.00313568	-1.70794	-0.597348	-2.57629	-0.525888	-0.451854	-0.539258	-0.117019	-0.372122	0.307848	-2.70409	-0.423801	-0.85046	-0.607794	-0.739568	-0.289433
803	0.0210195	3.25072	-0.0938239	1.68735	-0.181966	0.755294	-0.170728	0.560649	0.118168	1.80762	0.497016	0.78889	-0.213074	-0.373561	-0.24118	0.0703053	-0.211238	0.7777	-0.0416398	0.988165	-0.170975	-0.104086	-0.0028429	0.305274	-0.0588093	-0.431455	0.0966201	0.450007	-0.0934887	0.916912	-0.277615	0.762465	0.330387	-0.136172	0.680163	-0.465903	-0.159703	-0.0898132	0.694644	-0.209507	0.529754	0.683698	0.496016	0.723242	0.13192	-0.322126	-0.0985088	0.692214	0.774666
804	2.47151	0.327264	3.62624	2.06918	2.74936	3.22394	4.03296	3.93953	2.21546	2.52152	3.92398	-2.03779	3.72419	1.88861	2.75606	0.640606	2.74876	2.65437	2.91713	1.72396	2.52048	-3.64255	2.32918	6.10864	2.03655	-2.48034	6.41406	2.64062	2.46382	1.68293	2.84777	3.5835	1.19328	1.76906	1.99694	3.09067	3.11074	2.16636	-0.0219584	2.78245	2.39235	2.10332	0.610135	0.970648	0.629748	1.34269	1.72068	1.89165	0.507222
805	-0.987412	-0.747209	-0.780282	-0.938128	-1.6516	-1.0018	-2.90377	-0.368356	-1.12997	-1.60002	-2.99735	-1.12041	-3.17733	-0.759803	-2.38972	-0.733068	-0.926591	-0.406244	-1.64096	-0.93886	-0.6441	-0.592514	-1.71281	-0.781492	-2.8066	-0.735367	-0.692847	-1.07151	-1.14199	-1.07243	-2.59131	-1.01907	-1.01959	-0.421636	-2.85276	-2.18272	-2.77159	-2.87519	-0.532809	-2.48218	-2.60791	-0.971519	-0.863594	-2.63251	-0.797979	-1.36289	-2.04151	-1.16784	-1.03049
806	-2.25559	-2.79171	-2.3611	-2.48029	-1.78783	-2.40399	-1.89674	-1.88023	-2.22266	-2.31929	-2.79097	-2.58836	-2.04853	-2.7621	-2.37588	-1.89041	-2.17379	-2.21444	-1.31578	-2.15019	-1.73898	-3.5689	-1.53002	-2.45679	-1.61132	-2.54092	-2.58349	-2.63759	-1.84	-2.79343	-1.88766	-2.23134	-1.93039	-2.67093	-2.52569	-1.89509	-1.81888	-1.75521	-2.60525	-2.23547	-2.93999	-2.21031	-2.12477	-2.03607	-3.0786	-1.75277	-3.10592	-2.06555	-1.93544
807	4.04644	1.99993	3.77724	3.12716	3.90206	2.47187	3.04225	2.7299	3.36882	2.42278	3.43298	2.17081	3.15139	2.67924	3.29854	2.89158	3.53634	3.20031	3.52149	3.32731	3.72514	2.4826	3.35675	3.43893	3.68936	2.67929	3.54642	3.32499	3.65361	3.43395	3.45334	4.0055	3.01945	3.26909	2.59978	2.96331	3.49631	3.51259	3.53602	2.94823	2.16428	3.42277	2.55214	3.03525	2.31622	2.88613	3.04214	3.43969	3.06928
808	-0.67204	-0.181928	-0.591055	0.134083	-0.678805	-0.0414934	-0.766272	-0.121377	-0.460383	-0.69003	-1.02512	-0.288661	-0.928767	0.271939	-1.00699	-0.0619016	-0.778333	-0.510553	-0.730602	0.0264258	-0.0224056	-0.765507	-0.723885	-0.0561996	-0.474093	0.227412	-0.509445	0.454322	-0.432559	0.0324287	-0.864011	-0.413513	0.310254	-0.285081	-0.677604	-0.712595	-0.733705	-0.539149	0.189155	-0.923066	-0.154547	-0.393637	0.142219	-0.464915	-0.336967	-1.69104	-1.62579	-0.430551	0.58613
809	-2.52276	-0.924232	-2.8503	-0.446756	-3.02149	-2.55932	-1.57463	-1.02413	-2.60341	-1.10554	-1.05487	-0.502643	-1.40247	-2.54974	-1.2297	-0.647871	-1.02599	-1.14523	-0.898592	-0.692355	-0.867598	-2.62009	-2.92576	0.167155	-2.90263	-0.253092	-0.499516	-0.178242	-0.608164	-0.561397	-1.26019	0.324292	-1.66313	-0.325482	-1.96787	-2.68984	-1.09596	-2.54937	0.102506	-3.05145	-0.661442	-2.19442	-0.182698	-1.07374	-0.96282	-2.99253	-1.06062	-3.23077	-1.69913
810	-1.6683	-0.640766	-3.44354	1.54346	-2.54254	1.00314	1.62997	1.73947	-2.48983	-0.404997	-0.274853	-2.69845	-0.328232	1.06049	-2.14696	3.28859	1.9054	1.81389	0.801107	0.555456	0.312835	2.4386	-2.65249	0.771857	-3.15762	1.66728	1.80712	2.37296	0.792529	1.78158	-2.98283	1.22649	0.271671	0.909645	1.90802	1.58107	1.58618	-0.545253	1.32071	0.827807	1.82769	0.244091	1.79671	1.28393	-0.212942	-2.27692	-0.837574	0.751917	0.734338
811	1.18854	0.261508	1.90354	2.23417	2.04906	2.45484	0.392406	0.634834	1.08212	0.175943	0.454057	1.81239	0.56728	2.16308	0.313749	2.50256	1.36944	1.59469	1.11368	2.26826	1.5355	0.922875	0.689326	1.75481	1.8219	3.86346	1.4498	3.77175	1.56139	1.5868	0.858575	1.31199	3.54177	0.511106	0.69854	0.327041	1.69835	1.5083	2.9664	1.57804	1.67474	1.57218	2.75053	1.20581	1.57536	0.675198	0.575845	1.3834	3.84743
812	-0.126692	3.54458	-0.085855	0.421518	0.150318	0.714333	-0.415868	0.172784	-0.55267	-0.0786896	0.0104837	1.65941	-0.642158	0.0445232	-0.588315	1.20978	-0.49358	-0.222094	-0.154757	0.442352	-0.609183	0.712637	-0.0101967	0.939918	-0.761377	0.576471	0.224199	1.02584	0.127037	-0.0163174	0.060122	0.304546	0.751079	-3.07853	-0.225211	-2.44678	-0.581882	0.208794	0.0432749	-0.399301	0.728779	0.812778	0.614518	0.175153	-0.146171	-2.34109	-0.838622	-0.187486	-0.256429
813	-2.05611	-0.0438824	-2.76239	-0.460033	-3.20854	-0.332432	0.325644	-0.335443	-1.95286	-0.157161	-0.431093	-0.307695	-2.62559	-0.479448	-0.711867	-0.480858	-2.66707	-0.732044	-0.145982	0.268894	-0.630114	0.0617976	-0.117901	-0.229957	-2.76313	-0.430747	-1.4903	-0.32537	-2.91366	-0.315684	-2.67973	-2.89008	-0.237079	-0.0207844	-2.98025	-0.564995	-2.70253	-0.480658	-0.807364	-2.58003	-0.161016	-0.289691	-0.778675	-0.219516	-0.342957	-3.28433	-0.77772	-2.82373	-0.234191
814	-0.911038	1.28778	-0.963843	-0.146194	-1.19981	-0.957786	-0.913205	-0.488018	-0.670198	0.323554	-0.93364	-0.447618	-1.10939	-0.37865	-2.38563	0.0715518	-0.255202	-0.226986	-0.625426	0.251341	-0.708126	-0.166777	-0.692829	1.35189	-0.639299	0.0664463	-0.735106	0.148637	-0.365289	-0.531711	-0.936668	-0.444019	-0.225749	-0.0427437	-1.8987	-1.20687	-0.606791	-0.491361	0.363508	-1.75029	-0.00133896	-1.29486	-0.373768	-2.15811	-1.6662	-1.67086	-0.644464	-0.399734	0.295014
815	1.69908	2.13891	1.45467	2.31717	1.61184	2.6235	1.33167	1.66657	1.80696	1.09058	1.5055	2.30192	1.21217	2.21211	1.54528	2.20221	1.51051	1.53857	2.1016	2.50053	1.73843	1.60487	1.89443	2.92661	1.60323	2.72044	1.60176	2.80554	1.77181	2.20775	1.25858	2.04687	2.56671	2.80569	1.43079	1.27765	1.54342	1.57186	3.57729	1.28092	1.88623	1.98957	2.78335	1.25703	1.709	1.11742	1.29951	1.73536	2.64139
816	1.19292	-2.76684	1.08999	0.349683	1.21707	0.00784492	0.304892	0.243291	0.322259	-0.163286	0.24715	-2.93278	0.68606	0.229521	0.795415	-0.0760703	0.837985	0.954168	0.440375	0.873017	1.09951	-0.0465417	0.790608	0.32075	1.35611	0.115042	0.607385	0.205446	0.83138	0.926538	0.609167	1.10021	-0.0105486	0.0425711	0.167377	0.360976	0.949664	0.709187	-0.219171	0.564699	-0.354191	0.829468	-2.1113	0.476348	0.180183	0.369429	0.559174	0.935742	0.27623
817	-2.08676	-0.729441	-1.76168	-1.15723	-1.64667	-1.03721	-2.35779	-1.50947	-1.572	-1.56418	-1.59396	-1.20966	-3.35635	-0.613055	-3.02312	-1.22986	-2.00229	-1.46793	-1.95791	-1.38267	-2.1944	-0.202538	-2.1157	-1.01058	-2.82802	-1.89729	-1.81541	-1.23346	-1.27125	-1.32725	-3.24976	-1.24228	-1.36617	-1.24585	-2.39497	-2.00397	-1.54688	-2.88702	-0.435864	-3.12654	-1.17138	-1.63469	-0.986736	-1.35577	-2.7456	-2.36735	-1.34482	-0.938646	-1.47537
818	5.53333	3.16099	5.39878	4.38891	5.27357	4.32941	4.52647	4.80038	5.33985	3.96093	5.31083	4.16069	5.04854	4.24485	4.36691	4.20034	4.91028	5.1605	4.83753	5.03809	5.38196	3.70172	4.98924	4.74371	5.25612	4.13973	5.17462	4.53571	5.35581	4.80953	5.0495	5.61625	4.40516	5.61949	4.34808	4.46073	5.35258	4.46726	4.79289	4.66071	3.35606	4.86421	4.40992	4.56883	3.90458	4.71374	4.40509	4.8283	4.3613
819	0.708098	-3.34295	0.593363	0.0412617	0.956474	0.0712805	0.639292	0.268602	1.06795	-0.542572	0.639576	-0.731387	0.364681	0.282074	0.639122	0.0980887	0.402782	0.377089	0.86406	0.580216	0.737501	-2.32064	0.799123	0.475893	0.945912	0.22512	0.659761	0.191116	0.78603	0.54061	0.998694	1.41479	0.346509	0.000919342	0.0922918	0.378251	0.489722	0.850495	-0.0537596	0.583329	-0.00238895	0.770891	-0.32001	0.155283	0.0267372	0.361938	0.465746	0.799734	-0.0780659
820	-1.03076	-1.33773	-3.4514	-0.327311	-3.22646	-0.369206	-2.95655	-0.82706	-1.09516	-3.10147	-1.86732	-0.26439	-3.45214	-0.44876	-2.29506	-0.793524	-2.54741	-2.59638	-1.13588	-0.655152	-0.470288	-1.24944	-2.27873	-0.473616	-0.949003	0.0632076	-0.792945	-0.456069	-1.12814	-3.16772	-2.92875	-2.5359	0.27349	-0.762862	-0.944431	-2.56348	-0.54085	-1.6075	-0.283999	-2.62825	-0.555102	-0.437083	-0.0874891	-3.45486	-0.889069	-2.98278	-2.66562	-0.591916	0.0218143
821	3.12251	2.92695	3.02126	4.00132	3.14052	3.84342	3.08381	3.87731	2.91635	2.7314	3.8086	3.20602	2.95301	3.82469	1.9907	3.97297	2.91414	3.47433	3.71349	4.10696	2.84324	4.21884	3.68989	4.85722	2.97272	4.09298	3.04648	3.72709	3.24538	3.55983	2.97002	3.70884	4.29374	4.01511	3.27175	3.01506	2.69062	3.10042	4.45635	2.88594	3.73124	3.26007	4.09466	3.6568	3.34311	1.77952	2.49839	3.01996	3.73784
822	-0.154066	2.08304	-0.193951	0.611737	-0.22004	1.68468	-0.870193	-0.376738	-0.346222	-0.20914	-0.522164	1.17168	-0.539406	0.0965872	-0.988529	-0.0141044	-0.230143	-0.217864	0.066608	0.681186	-0.542644	-0.726694	0.26123	0.950902	-0.432026	0.35444	-0.191515	0.868382	-0.208179	0.0998383	-0.426517	0.11855	0.299827	1.39086	-0.414784	-0.647538	-0.681941	-0.330938	1.88504	-0.564987	0.196402	-0.0719795	0.886262	-0.213881	0.0262699	-0.956805	-0.922443	-0.117644	0.774999
823	-0.264352	2.36965	0.4663	0.531603	-0.791249	0.846476	0.0561657	0.456925	-0.800136	-2.92578	-0.768672	0.0632019	-0.296996	2.20457	-2.22599	2.4454	0.407542	0.709593	0.219906	0.30898	-1.39918	3.22879	0.355104	1.20142	-0.249168	1.3238	0.237944	2.1502	-0.705334	0.0910196	-0.0975728	-0.0277786	2.06141	0.51787	-2.45178	-0.182714	0.0855951	-0.342527	1.33073	0.90655	0.832117	0.916837	2.08383	-0.516803	0.00257778	-1.7857	-0.23439	-0.612756	0.0252008
824	1.13776	1.50822	0.799169	1.85024	0.930003	1.7618	1.38069	2.14131	0.535961	0.378099	0.190589	0.571741	0.91472	1.14943	0.386137	2.25598	1.10868	3.16907	1.44709	2.16417	0.750319	2.49166	1.81302	3.64806	0.744678	1.12457	1.44956	2.17696	1.03235	0.829926	1.00583	2.06526	1.73357	-0.350078	0.543774	1.00542	1.40628	0.904453	1.38818	1.25394	1.42563	1.51303	2.0416	-0.249523	2.0132	-0.250587	2.00104	0.532898	1.19835
825	-1.62829	-1.06515	-1.5066	0.0926123	-1.43122	-0.144976	-1.16886	-0.235652	-0.617094	-0.384678	-1.51569	-1.03385	-2.714	-1.11332	-1.91692	-1.3142	-1.3723	-0.947655	-0.694988	-0.445791	-1.67834	-0.89483	-1.10536	0.570481	-1.35226	-1.07546	-0.95905	-0.820144	-0.613469	-0.827907	-1.00035	-1.07352	-0.61004	-1.22423	-0.791624	-1.54319	-1.39734	-0.718998	-1.04555	-1.26136	-0.747231	-1.36284	-0.203594	-0.923734	-0.988249	-2.54779	-2.08195	-0.99003	-0.614874
826	-0.0151706	1.49443	-0.163262	0.661276	0.0949912	0.605909	0.110845	0.261344	-0.0446701	-0.353459	0.163805	0.731229	-0.193988	0.333772	-0.645693	0.512657	-0.033824	0.38758	0.342533	0.607737	0.141078	0.387819	0.414646	0.757204	0.140681	0.661158	0.0657544	0.885528	0.294285	0.509135	-0.0943198	0.474356	0.734106	0.249826	-0.0733223	-0.109887	0.00652122	-0.0688667	2.045	-0.0930223	0.620557	0.225389	1.25313	0.341782	0.18992	-0.37908	-0.409606	0.220026	1.13608
827	-2.29989	-1.27506	-2.41849	-1.2269	-1.46902	-0.841247	-2.8499	-1.69224	-2.14427	-2.18202	-1.80347	-0.554081	-2.98533	-1.25229	-2.96448	-1.67272	-3.17091	-2.44267	-2.21678	-1.70336	-2.36441	-2.0412	-1.77437	-1.44477	-2.34655	-0.936884	-1.98424	-0.94902	-2.21175	-2.23104	-2.86994	-2.19281	-0.96981	-1.41898	-2.19967	-1.51255	-2.54208	-3.33018	-2.019	-2.77051	-2.9521	-1.47749	-0.762259	-2.63148	-2.053	-2.85708	-1.7322	-1.74202	-1.65664
828	2.02427	1.40164	3.02781	1.6929	2.9578	0.911777	1.75197	1.69835	2.7304	1.53774	1.99577	1.48966	2.44444	-1.9637	1.06964	2.04587	1.9684	1.50862	2.34223	1.94289	2.28905	1.8951	2.42609	2.97279	2.05458	1.38512	2.74989	1.91469	2.60932	1.96803	2.49717	2.67363	1.82093	1.82562	1.5003	2.28787	2.18418	1.96379	1.03507	2.39196	1.69794	2.14761	1.47829	1.92353	1.67122	1.94326	1.62117	1.89498	1.25075
829	-0.249738	-0.873611	0.101887	-0.755162	-0.155003	-0.441549	-0.230043	-0.59472	0.183098	-2.61151	0.500461	0.0485697	-0.131783	-1.94697	-0.0718446	-0.305213	-0.188618	-2.90397	-0.384049	-0.111583	0.105403	-3.697	0.0705881	-0.112394	0.149311	-0.337997	-0.277356	-0.466442	0.145497	-0.63779	-0.702204	-0.480925	-0.30003	0.63109	-0.528754	-0.492308	-0.211825	0.112224	-0.615681	0.0690622	-0.082304	-0.198757	-0.0651951	-0.801872	-2.95322	-0.396193	-2.93669	-0.122814	-0.54151
830	-0.214217	0.292336	-0.383865	0.804994	-0.371056	0.31461	-0.617781	0.606725	-0.549145	-0.532126	-0.542736	0.370592	-0.441114	-0.195562	-0.523235	-0.346616	-0.308751	-0.212221	-0.715074	0.329025	-0.271806	-1.28197	-0.621072	0.368931	-0.0936775	-0.352729	-0.444044	0.133212	-0.313657	0.621638	-0.746554	-0.449134	-0.274183	-1.04638	0.0336018	-0.844207	-0.318097	-0.569761	0.247869	-0.565123	-0.34633	-0.12439	0.287424	-0.0415869	-0.0334826	-0.787632	-0.364889	0.0148892	0.381034
831	1.73645	0.638375	2.18093	3.14524	2.17419	2.74364	1.95237	2.5192	1.96982	2.03181	2.08495	2.4234	1.58482	2.54448	0.572206	3.13511	1.95205	2.08826	1.87629	3.26903	1.61919	2.28077	1.89592	2.90556	2.28996	3.14873	2.84444	3.42913	2.1477	2.2251	1.69777	2.57284	3.81494	1.80098	1.81533	1.72795	1.86267	2.05012	3.42043	1.75073	2.57154	2.30552	2.89545	1.21759	2.03031	1.2516	1.34242	2.28745	3.91891
832	-0.791719	-1.80994	-1.41834	-1.10459	-0.655854	-1.16042	-1.94633	-1.36881	-2.34367	-2.71757	-1.04723	-1.71567	-2.36369	-1.46479	-2.79671	-1.39486	-2.82184	-0.921059	-2.7546	-1.21874	-3.46146	-1.47468	-1.11817	-0.717823	-2.90379	-0.929736	-3.28587	-1.66138	-0.713143	-1.53704	-2.5759	-1.2316	-1.27856	-0.979993	-2.29654	-1.76815	-3.17468	-2.9069	-0.541066	-3.05945	-0.78566	-3.00083	-1.17915	-2.08936	-1.58302	-3.38082	-2.89442	-3.30193	-1.34098
833	0.15045	0.737653	-0.302343	0.923938	-0.109908	0.922085	-0.664455	-0.258555	0.069746	-0.630344	0.0265875	1.00171	-0.375887	0.25343	-0.434753	0.305552	0.106741	0.177798	0.0605302	0.4867	-0.0710382	-0.240128	-0.114842	0.75134	0.317277	0.397082	-0.0857978	1.42247	0.196527	0.513349	-0.457538	0.583985	0.203736	0.0981531	-0.160652	-0.563298	-0.00470543	-0.33232	1.0491	-0.562321	-0.177798	0.271471	1.2344	-0.146365	-0.0612783	-0.0837917	0.000613213	0.167195	0.826799
834	0.652153	-2.35217	0.494688	0.244423	0.889985	-0.265654	0.462127	0.0970545	0.739895	-0.139915	0.436575	0.336611	0.227906	-0.0843897	0.562745	0.477524	0.472571	0.40594	0.826499	0.386979	0.783	-2.61915	0.994228	0.128562	0.634503	-0.302162	0.53562	-0.324606	0.750929	0.821287	0.587911	0.866894	-0.164698	-0.277527	0.240023	0.384897	0.57554	0.898763	0.28811	0.534831	0.217978	0.631102	-0.93402	0.213793	0.206142	0.135733	0.142688	0.416131	-0.371174
835	-0.163908	0.115002	-0.153291	0.674926	0.121708	0.62132	-0.343867	0.383027	0.374441	-0.196873	0.441259	0.448418	0.111099	0.569078	-0.425931	0.440393	0.774641	0.597558	0.613827	0.83422	-0.110689	1.19704	0.435637	1.24103	-0.160323	0.791214	-0.0366139	1.23513	0.534293	0.412342	-0.314419	0.497263	0.619479	-0.212719	0.00760078	-0.272983	0.142947	-0.185383	0.956097	-0.0607586	4.00875	0.326715	0.963924	0.21298	0.385825	-0.537566	-0.258656	0.136867	0.75917
836	1.21714	3.48814	0.606937	2.867	1.0793	2.92498	1.28608	2.77187	0.32183	0.857325	0.20128	2.4118	0.907757	-0.863125	-0.113115	-0.421467	0.925643	0.976936	0.541868	2.35271	1.03108	0.177631	0.86784	2.53092	1.2212	-0.325985	1.04241	2.20575	1.27482	2.21323	0.317173	0.806379	0.563109	3.43104	2.43818	0.599712	0.585194	0.850925	2.53572	0.175219	1.38483	1.1633	2.69287	0.277453	1.91509	0.436982	0.718102	1.32573	2.67072
837	-2.19206	-0.199665	-2.54242	-0.291935	-2.82902	-1.76276	-3.72053	-0.980864	-2.8992	-0.840266	-2.22398	-1.67723	-3.19135	-2.66536	-2.91396	-3.15787	-2.31661	-1.60209	-3.14474	-1.06023	-2.46368	-2.04053	-2.18351	-1.28639	-1.73972	-3.15067	-1.95374	-1.93159	-1.77018	-1.65644	-2.44588	-2.51739	-2.20694	-2.93105	-1.55324	-2.24388	-2.75455	-3.14418	-1.7325	-3.13069	-1.96101	-1.82026	-1.47193	-1.70423	-2.88996	-3.22184	-2.67735	-1.64985	-1.62725
838	-0.0749383	-2.95617	0.361701	-3.13496	0.222408	-2.56474	-2.99551	-3.01903	-0.00917244	-2.6028	-0.618715	-2.43327	0.173018	-2.55887	-0.480424	0.158662	-0.179552	-2.8757	0.163485	-0.535198	-0.323837	-3.0475	0.204353	-0.571883	-0.487161	-0.50669	-0.535084	-2.98111	0.113821	-0.174302	-0.712818	-0.196985	-2.73939	0.104489	-3.06103	-0.526293	-0.105123	0.200582	-0.334371	-3.09075	-0.343497	-2.32588	-2.15851	-3.06693	-2.80151	-2.93067	-1.84399	-2.75248	0.00805473
839	0.229822	-0.52702	-0.285311	1.22976	-0.515754	0.729247	-0.414821	0.9443	-0.0242472	0.724976	2.13184	0.970485	0.70124	1.68755	-0.423425	0.299698	0.269017	1.39274	-0.475495	0.710721	0.00456142	2.41177	-0.565222	1.11609	-0.49626	0.508095	-0.271233	0.329839	0.186187	1.11353	-0.126838	0.32731	0.449091	0.550045	1.18351	-0.440287	-0.404869	-0.540365	0.894144	-0.308367	0.687518	-0.168214	0.20338	2.00227	0.195621	-0.0760918	-0.0379562	-0.147505	0.30556
840	-0.231268	-2.17062	-0.615555	-0.881536	-0.614735	-1.77742	-1.31021	-0.928695	-1.04023	-1.88739	-0.487197	-1.41935	-1.78718	-1.71354	-0.580237	-1.29126	-0.68149	-2.62719	-0.879559	-1.61397	-0.429039	-3.37698	-0.870515	-0.604626	-0.366405	-1.67477	-0.757316	-1.56823	-0.782772	-1.16496	-1.18048	-0.725207	-1.48251	-1.02262	-2.77273	-1.37173	-1.16447	-0.916626	-1.25664	-1.13583	-1.25924	-1.229	-1.44613	-2.81981	-2.30945	-0.78426	-1.59217	-1.47014	-1.9187
841	-0.199264	-0.985038	-0.473938	-0.702227	-0.356553	-1.57973	-0.431334	-0.840555	-0.143733	-0.693579	-0.714041	-1.11596	-0.599038	-1.36264	-0.747804	-1.31223	-0.909004	-1.06285	-0.212385	-0.964988	-0.334097	-2.90773	-0.188011	-0.656176	-0.462586	-0.881026	-0.627638	-0.971803	-0.327926	-0.837275	-0.149989	-0.1927	-0.95878	-1.28823	-0.939255	-0.325505	-0.277738	-0.152795	-1.08221	-0.482471	-0.713501	-0.746379	-0.807486	-0.47834	-1.10347	-1.01612	-0.90352	-0.910309	-0.75598
842	6.37325	8.77143	6.59805	7.32798	6.70229	7.6316	6.2191	6.84619	6.07054	6.24513	6.38871	7.61035	6.08721	6.19116	5.5258	6.81323	6.33556	6.5274	6.98173	7.24768	6.41764	6.1447	6.77974	7.77168	6.80443	7.66214	6.99758	7.6418	6.59097	6.58939	5.78531	6.82574	7.72532	7.74864	6.48617	6.07295	6.06726	6.63293	8.00731	6.00109	6.46563	6.50749	7.95027	6.02086	6.4659	5.53225	5.93011	6.37936	7.74136
843	-1.89276	-0.61692	-2.47789	-0.841969	-2.75947	-1.08389	-3.00239	-0.665971	-0.630798	-2.29506	0.362381	-1.45753	-2.48764	-0.727668	-2.80718	-0.336444	-2.25073	-0.340757	-3.06495	-0.518029	-1.36916	-0.558907	-0.359487	-0.321817	-2.74341	-0.883224	-0.705807	-0.788817	-2.25447	-2.2189	-2.87487	-2.05021	-0.574622	-0.454656	-0.252733	-2.7837	-0.690144	-2.35655	-0.369321	-2.56766	-0.652791	-0.000722885	-0.350733	-2.51841	-3.5072	-2.4072	-1.78317	-2.41036	-0.85915
844	0.260004	-2.60598	-0.00322008	-0.054842	-0.116513	-0.52905	0.694597	0.354856	0.376017	0.222395	0.303785	-0.596565	0.51795	-2.26764	-0.160144	-0.69084	-0.498636	-0.852847	1.09615	0.80611	-0.2339	-2.91818	1.28356	-0.0709748	-0.147573	-2.40943	0.316045	-0.470726	-0.471176	-0.130959	0.473634	0.516942	-0.135945	-0.82392	0.602551	0.727184	-0.199968	0.83664	0.0750484	0.547003	-0.070982	-0.0308714	-1.5441	-1.09625	-0.111752	-0.171292	-0.621555	-0.675333	-0.743893
845	1.99046	2.00963	1.54842	2.48376	1.82257	2.70896	1.34644	1.63118	1.93608	1.1861	1.67866	2.40729	1.36112	2.24438	1.60427	2.3344	1.60609	1.80461	2.07347	2.57618	1.80338	1.41525	1.90369	2.54423	1.70759	2.85117	1.69026	3.38425	1.91965	2.23089	1.39863	2.1469	2.79453	1.98939	1.5407	1.27429	1.79314	1.70777	2.8749	1.5499	1.74753	2.06845	2.87789	1.71	2.19582	1.32088	1.4034	1.91086	3.18757
846	-3.04393	-2.14774	-2.99633	-1.33655	-2.93721	-1.46215	-2.29354	-2.25318	-2.7055	-2.44219	-2.42937	-1.50129	-2.90991	-1.4792	-2.25549	-1.78564	-3.37772	-3.13311	-1.96271	-1.7889	-3.21194	-3.66335	-2.46371	-2.10967	-2.8112	-1.32319	-2.55446	-1.29459	-1.93976	-2.62564	-2.37893	-1.99596	-1.1936	-2.3745	-2.91662	-3.04238	-2.65198	-3.05226	-1.42252	-2.0925	-2.06361	-2.16367	-1.83758	-2.36122	-1.44657	-2.46089	-3.05864	-2.81725	-2.57218
847	2.59067	2.38075	3.42297	2.27525	3.57101	2.17628	2.76079	1.76215	3.46733	1.7699	1.64127	1.70934	2.65111	1.81155	2.21001	2.73049	3.05739	2.70592	3.20671	2.57319	2.87227	0.720105	3.15809	2.26463	3.36692	2.26047	3.28639	3.20809	3.34744	2.61298	2.68579	2.78321	2.87041	3.02531	1.59428	2.42559	2.99066	3.03123	3.32234	3.3996	1.97586	2.32495	2.92778	2.6525	1.96514	2.29772	2.29971	2.74476	1.23815
848	-0.110736	-1.21324	-0.405216	-0.686899	-0.349725	-0.882264	-0.582795	-0.894688	-0.606812	-0.829903	-0.748502	-1.35051	-0.20385	-2.88194	-0.844621	-0.8979	-0.457289	-0.756859	-0.672742	-0.780694	-0.567445	-3.13375	-0.648253	-0.598057	-0.681314	-1.06079	-0.0532279	-0.991861	-0.460258	-0.707531	-0.50323	-0.399093	-1.56743	-1.0654	-1.06943	-0.839772	-0.541032	-0.614038	-1.70835	-0.670344	-1.05186	-0.285647	-1.74721	-0.763477	-1.10806	-0.68416	-0.557621	-0.797859	-1.08631
849	2.38265	1.89555	2.45755	3.20582	2.25652	2.67105	1.87584	2.17421	2.52727	1.95064	2.18021	2.64564	1.50652	3.3289	1.64336	3.59932	2.4202	2.76635	2.99796	3.58627	2.05684	2.22909	2.65397	3.49949	2.40785	3.68688	2.5784	4.19823	2.57411	2.61399	1.7583	2.6224	3.60101	2.75848	2.09738	2.09059	2.1117	2.21612	4.05606	2.10954	2.54777	2.81248	3.29155	2.46037	2.84397	1.24635	1.63978	2.74813	4.02716
850	-0.953299	-0.445178	-1.37484	-0.151278	-1.24536	0.349234	-1.18408	-0.404033	-1.09806	-1.17963	-1.49331	-0.035614	-2.49553	-1.27462	-2.7657	-1.16729	-1.17559	-1.05015	-0.95004	-0.246137	-1.42108	-1.68079	-0.85207	-0.323991	-0.963543	-0.679766	-1.01488	-0.313688	-0.736006	-0.455716	-1.5892	-0.973966	-0.431771	0.0384073	-0.654885	-1.61974	-1.38379	-1.45862	-0.270642	-1.461	-0.9586	-0.935586	-0.265024	-1.27367	-0.933892	-2.28184	-2.1659	-0.797764	0.0862751
851	2.60295	3.03161	2.33665	3.19163	2.47714	3.62884	1.86753	2.32534	2.49835	1.81374	2.57726	3.20702	2.0092	2.84202	1.94781	3.08993	2.2966	2.44963	2.71331	2.96319	2.20936	1.90261	2.47005	3.60027	2.43123	3.14381	2.40334	3.79942	2.52773	3.00397	1.84024	2.92276	2.60162	3.33042	2.07024	1.79989	2.32826	2.11614	3.56932	1.98424	2.20221	2.42171	3.38433	2.44611	2.71101	2.10285	2.13706	2.4831	3.50339
852	2.73523	2.22024	2.68428	2.07477	2.82476	2.19239	2.13342	1.72703	2.0784	1.48578	2.10004	1.49789	2.4442	1.46132	2.23945	1.95204	2.5597	2.18527	2.34765	2.50085	2.62025	1.05436	2.48635	2.34192	2.98487	1.94887	2.67584	2.18238	2.58997	2.24551	2.16414	2.57915	1.83461	2.02453	1.95098	2.30452	2.83994	2.65711	1.8501	1.92339	1.62202	2.27866	1.96012	2.0902	1.78428	2.23233	1.91737	2.23636	1.77736
853	1.36729	1.45878	1.22804	2.32053	1.4622	2.18555	0.89652	1.48764	1.67523	0.808297	1.24588	1.96346	1.12473	1.80319	0.854593	1.93917	1.16562	1.2939	1.82449	2.09261	1.37308	1.03746	1.59446	2.23582	1.44299	2.5599	1.39563	2.95021	1.85101	1.92511	1.18106	2.02042	2.35759	2.1311	1.06002	0.922769	1.27055	1.31189	2.76731	1.20401	1.49996	1.66987	2.54793	1.28937	1.69879	0.703518	0.755318	1.36573	2.70034
854	-1.91089	1.68968	-3.76235	-0.040061	-2.42323	-1.23776	-0.891882	-1.19662	-2.23397	-0.704379	-0.981268	-0.131453	-1.85117	-0.959685	-1.36006	0.300391	-0.581242	-0.566053	-1.06281	-0.225514	-1.49495	-0.504299	-3.35299	-0.0990539	-2.20018	-1.63944	-0.775549	-1.00246	-0.861171	-0.408624	-2.30892	-0.919403	-2.85672	-0.732785	-0.0351429	-0.546864	-2.48877	-2.17783	-0.210256	-0.787536	-0.684222	-0.770089	-0.257226	-0.273125	-0.858781	-0.899952	-0.818318	-1.02838	0.143891
855	1.16715	1.51263	1.11473	1.97429	1.23136	2.06971	0.54236	1.17765	1.36764	0.533865	1.51692	2.10918	0.561115	1.73644	0.542176	2.3579	1.2013	1.18389	1.77867	2.39027	0.988699	1.24839	1.47703	3.0936	0.983539	2.85279	1.2933	2.63643	1.63228	1.77617	0.69841	1.37415	2.08075	1.94041	1.03234	0.791694	1.26065	1.15919	3.64261	0.879763	1.02784	1.40181	2.13743	1.39345	1.70489	0.358976	0.483107	1.43709	2.37895
856	-1.00231	2.12575	-2.01737	0.249459	-1.71639	0.418098	-2.49298	-0.167897	-2.40678	-1.92709	-0.616889	0.872055	-2.17848	-3.4737	-2.0873	-2.59451	-1.54906	-0.799406	-2.31996	0.561921	-0.490061	-2.45209	-1.2628	1.00173	-1.60386	-3.14935	-1.4291	-1.26467	-0.112624	-0.368439	-0.758829	-0.338146	-2.94229	-0.533607	0.971514	-2.2261	-0.738842	-1.2039	0.726089	-2.55603	-1.87846	-1.21598	2.06907	-2.78379	-0.0268145	-1.44027	-0.774116	0.0651317	2.20425
857	-1.45461	-0.132957	-2.21882	0.0586214	-2.68785	-0.0518703	0.398603	-1.74451	-2.27661	-2.91076	-1.89265	-0.29334	-1.74525	-0.366792	-2.45651	-0.122707	-2.26594	-2.40181	-2.05517	-0.396381	-2.78756	-1.40298	-1.92481	0.0911126	1.74284	0.277535	-2.39904	-0.218748	-1.85902	-0.320712	-2.97379	-0.810054	-0.00586414	0.659612	-2.68948	-3.1583	0.119012	-3.08896	0.803813	-2.8878	-2.19919	-3.09884	-0.227632	-2.87572	-3.91544	-2.65349	-2.32847	-0.30619	-0.5268
858	1.33266	2.44602	1.34013	2.28491	1.42396	2.1286	0.9146	1.41005	1.11043	0.66308	1.15088	1.9857	0.824457	1.74303	1.06898	1.60899	1.50015	1.20906	1.55834	2.11717	1.4074	1.26658	1.36106	2.02829	1.57035	1.88718	1.47057	2.92736	1.45131	1.62154	0.798715	1.74594	1.8565	2.33243	1.20103	1.05496	1.1664	1.23693	2.46321	1.07497	1.43349	1.67889	2.63979	0.894582	1.45122	0.395426	0.924749	1.55655	2.27567
859	-3.58898	1.91428	-2.55804	-0.580679	-1.90596	0.0177021	-1.85041	-2.99829	-2.1049	-1.39669	-2.66866	-1.42239	-2.87461	-2.73126	-2.71174	-3.63729	-2.56814	-2.7249	-2.46529	-1.85915	-1.66392	-3.44902	-1.96544	-2.0653	-3.28939	-2.22155	-2.19678	-1.34373	-2.10584	-2.16785	-1.80012	-1.96199	-1.88762	-1.04766	-1.97983	-2.70722	-2.51784	-2.85773	-0.184923	-1.86991	-0.0549679	-3.25759	-0.761721	-2.5517	-2.11652	-2.53858	-2.27343	-1.64666	0.0973902
860	2.17794	2.7639	1.82146	2.66587	2.03966	2.89719	1.43558	1.70166	2.10447	1.14997	1.75684	2.57304	1.56638	2.47071	1.81735	2.56041	1.88899	1.91265	2.3545	2.84373	2.01369	1.69315	2.02962	2.81826	2.01447	3.05961	2.08087	3.46819	2.34157	2.4016	1.51877	2.37876	2.60631	2.61053	1.55949	1.14192	1.84043	1.70097	3.2596	1.4597	1.88959	2.13502	2.94337	1.6744	2.15543	1.41505	1.69202	2.00325	3.35263
861	-0.989373	-1.95092	-0.754393	-2.43128	-1.38664	-1.61492	-0.699107	-2.24023	-1.37995	-2.4853	-1.53843	-2.63736	-1.1887	-2.41471	-1.18841	-2.97809	-3.57219	-1.27868	-0.971725	-1.49927	-0.984197	-2.6206	-1.39623	-3.49572	-0.937817	-1.9214	-1.12604	-1.96509	-1.14306	-1.51576	-0.796097	-0.789925	-2.61839	-3.14762	-2.00755	-0.745439	-1.25839	-1.36192	-2.3643	-1.65023	-1.32008	-1.2404	-2.04345	-0.682009	-1.56648	-2.63938	-2.57836	-0.991291	-2.47626
862	3.49796	3.48164	3.20021	3.9352	3.13256	4.26218	2.66279	2.94781	3.43041	3.17723	3.44083	4.25587	3.06697	3.78808	3.16807	3.77501	2.61836	2.98762	3.25805	3.61061	3.30279	2.80194	3.24999	4.53006	3.19767	3.89314	3.27287	4.61483	3.65701	3.77096	2.79998	3.86989	3.42045	3.77237	2.93766	2.66025	2.69405	2.54959	4.08213	2.83718	2.84651	3.03196	4.09205	3.13686	3.36869	2.9532	3.10143	3.03133	4.03686
863	-1.18779	-3.08715	-1.0043	-1.56392	-1.29519	-1.83429	-1.90844	-3.51191	-1.26045	-2.53297	-1.46251	-2.39883	-1.19449	-2.68866	-3.18686	-1.65206	-1.05234	-1.73585	-1.14244	-1.49245	-1.2236	-3.08274	-0.816731	-1.82515	-0.615358	-1.65146	-0.962036	-1.43171	-1.53231	-1.09226	-0.808607	-1.35221	-2.52758	-1.88956	-2.5262	-0.915904	-0.96871	-0.712243	-2.70254	-1.25786	-2.01129	-1.34864	-2.00642	-1.57697	-1.75454	-1.59714	-0.851658	-1.12405	-1.32367
864	-0.835654	0.0102682	-0.978338	0.125017	-0.820006	-0.337316	-2.69467	-0.178849	-1.2122	-2.50262	-0.72273	-0.381313	-1.30164	-0.888305	-2.624	-1.05963	-3.1997	-0.790239	-1.12719	-0.274062	-1.81499	-0.808516	-0.964779	0.0270457	-2.27079	-0.80593	-0.863401	-0.64518	-0.693838	-0.270097	-2.93658	-0.810531	-0.64127	-0.922729	-0.947194	-1.39091	1.03763	-0.423883	-0.281343	-1.84964	-0.900454	-0.778104	-0.538803	-0.767031	-0.533892	-2.64175	-2.13473	-1.01865	-0.343849
865	2.63928	3.58622	2.75519	3.51303	2.6196	3.31837	2.68954	3.2507	2.57569	2.40928	2.74786	3.19213	2.27235	3.19064	1.85846	3.37364	2.30023	2.81057	3.36577	3.63507	2.33634	2.9267	3.36628	4.16319	2.78311	3.28014	3.1678	3.64608	2.8576	2.98893	2.24109	3.21664	3.42788	2.72966	2.70662	2.5447	2.01416	3.03638	4.1211	2.5636	3.26207	2.80241	3.393	2.47826	2.82366	1.20433	1.68881	2.92511	3.70643
866	0.50855	0.903669	0.223356	0.959171	0.342704	0.987941	-0.114166	0.578422	0.402002	0.0619478	0.566245	1.10153	-0.17173	0.804295	-0.198523	1.01343	0.300239	0.446682	0.680151	0.817522	0.283503	0.822775	0.510729	1.56279	0.348985	0.985035	0.429978	1.03491	0.591225	0.806832	0.218318	0.464606	1.07536	1.26429	0.500224	0.0774164	0.19608	0.210414	2.52788	0.0779104	0.777445	0.426971	1.34006	0.477559	0.599289	-2.78244	-0.309114	0.475993	1.28748
867	5.60478	6.1075	5.25395	6.22712	5.51963	6.40854	5.05579	5.7909	5.56804	4.84999	5.68615	5.94544	4.99092	6.12318	4.84486	6.20779	5.23634	5.70946	6.0756	6.42576	5.33086	5.68164	5.90957	6.67394	5.48116	6.41594	5.51802	6.41865	5.97659	6.0093	4.99462	5.88237	6.51183	6.51002	5.4619	5.15651	5.2167	5.49651	7.08931	5.23127	5.62153	5.75106	6.42636	5.44736	5.74233	4.57101	4.90894	5.64235	6.22007
868	0.308647	1.40676	0.967393	1.04185	0.114044	1.68494	0.311821	0.787067	0.301164	-0.135625	0.197626	1.40601	1.37504	0.605689	0.680031	1.07347	0.87466	0.590856	0.166163	0.971038	0.00979424	1.245	-0.0155783	1.89728	-0.172007	2.11625	0.0803638	1.16377	0.0700407	0.731115	0.848384	0.323633	1.64226	1.50006	0.458623	0.462139	-0.141888	-0.0550032	2.68816	0.704146	-0.198204	0.706179	1.74216	0.632763	0.37657	0.107686	0.485726	0.123839	0.736852
869	-0.517887	-2.56103	-0.680986	-1.1254	-0.341896	-1.42253	-0.57513	-0.503724	-0.712038	-2.58731	-0.339874	-1.84685	-0.559427	-3.54329	-0.422307	-0.69907	-0.316836	-0.824735	-0.44528	-0.708811	-0.488508	-3.53988	-0.68582	-0.723168	-0.468125	-0.788931	-0.605353	-1.01759	-0.136572	-0.901383	-0.64677	-0.381502	-0.654614	-1.10809	-2.25027	-3.09422	-0.407627	-0.431314	-1.30992	-0.548124	-2.66403	-0.752811	-1.13092	-1.05585	-0.936001	-0.680775	-0.745664	-0.831516	-0.903336
870	1.71851	-2.8093	1.74393	0.604609	1.34472	0.437987	0.88397	0.764886	1.54531	0.911307	1.58782	0.137058	1.09865	1.31646	0.643645	0.653435	1.56213	1.0755	1.14302	1.06063	1.51147	1.10267	0.761787	0.832494	1.48607	0.660488	1.37732	0.394135	1.56186	0.969663	1.17813	1.28739	-0.186193	0.949428	0.733216	0.72879	1.50069	0.87921	0.285613	1.16136	1.04464	1.09564	0.160587	1.18767	0.680449	1.1299	1.16488	0.964994	-0.131534
871	1.57107	0.621569	1.60303	0.468108	1.7249	0.17143	1.07455	1.01182	0.898985	-0.397968	0.42569	-1.28742	1.24676	-0.995546	1.0795	0.257347	1.36119	1.15219	1.56988	1.40171	1.71461	-0.556419	1.60875	1.38369	1.79691	-0.328427	1.72873	0.736968	1.37237	1.11042	1.25836	1.50275	0.695304	0.709156	0.397975	1.12921	1.15993	1.28621	2.10925	0.829783	0.724845	1.22259	1.54434	0.171029	-0.0285807	0.356099	0.575419	0.987201	0.362378
872	0.0540833	-3.67877	-0.211493	-1.48024	0.167546	-3.05881	-0.771839	-2.32375	-0.485911	-2.47468	-2.82247	-2.03238	-0.368722	-2.40041	-0.00360441	-1.46533	-0.290673	-0.0959148	-1.06604	-0.919987	-0.167856	-2.04639	-0.726822	-2.08552	0.0505695	-1.52212	-0.646063	-0.925378	-0.399278	-0.48237	-0.610254	-0.537807	-0.894297	-0.596968	-2.83737	-3.59052	-0.375773	-0.783628	-0.973855	-0.490054	-0.743465	-0.367602	-1.47225	-0.49585	-0.953228	-0.550112	-0.347775	-0.192716	-0.714702
873	-3.0352	-1.52314	-2.22022	-1.65881	-2.83499	-1.1468	-2.81092	-2.02523	-2.13262	-3.44405	-2.10598	-1.25802	-2.73586	-2.21219	-2.61432	-2.43313	-2.86915	-2.52256	-2.75159	-1.87734	-2.62908	-2.46999	-2.60276	-2.03753	-2.52325	-2.15031	-2.39588	-1.55081	-2.10556	-1.66922	-2.50465	-2.20213	-1.95416	-0.942722	-2.38906	-3.30691	-2.73981	-2.77425	-0.724621	-2.22618	-2.93694	-1.66328	-1.31083	-3.26554	-2.14116	-2.32739	-2.18924	-3.04617	-1.05546
874	-0.0137944	0.45765	-0.481017	0.526484	-0.405083	-0.0556469	-0.938355	0.256697	-0.860607	-0.369039	1.49666	0.166232	0.286411	1.17441	-1.16387	0.491294	-0.0791101	0.77591	-0.589292	0.369182	-0.395524	1.76092	-0.64896	0.855073	-0.932306	0.153199	-0.238794	0.395244	0.299091	0.65145	-0.597375	0.116172	-0.156812	0.464596	0.582129	-0.755229	-0.923553	-0.79972	1.12216	-1.09806	-0.110566	-0.366898	0.0228176	1.24582	0.0421982	-0.397857	-0.201605	-0.664099	0.250981
875	0.079639	0.686068	0.10197	0.868824	0.172538	0.785101	-0.011178	0.390852	0.133325	0.129209	0.348727	0.850451	-0.43745	0.288394	-0.763089	0.461005	0.164155	0.550251	0.403185	0.930142	-0.250131	0.138633	0.41761	1.24903	-0.223767	0.262833	0.0995412	0.760222	0.289415	0.571789	-0.252761	0.083725	0.374061	0.328492	0.429084	-0.187492	-0.0476418	0.205071	1.01413	-0.0242062	0.0333319	-0.235312	0.495763	0.384952	0.517941	-0.47151	-0.152688	0.422685	0.907932
876	-1.53568	-0.35741	-1.76273	-1.19136	-1.77265	-0.592797	-1.81231	-0.940822	-1.47134	-0.0463037	-1.64629	-0.423419	-2.32447	-1.02307	-1.86013	-1.42935	-1.67071	-1.07955	-1.72517	-1.32794	-1.83753	-2.41825	-1.98396	-1.3131	-1.29393	-0.869835	-1.43127	-1.14198	-1.37038	-1.48764	-1.57811	-1.19795	-1.21886	-0.0860062	0.443539	-1.70878	-1.71592	-1.89449	-0.588325	-0.163913	-0.0141478	-1.6858	-0.974307	-1.76873	-0.662905	-0.942414	0.326462	-1.91312	-1.09054
877	-0.864045	1.52805	-0.870594	1.38091	-3.38469	-2.11356	-0.746338	0.950184	-0.646544	-2.93637	-2.27309	1.04609	-1.55198	-0.816627	-2.7883	0.296554	-2.23906	-0.821987	-2.58282	0.533756	-4.02957	-0.990983	-2.13003	-2.14861	-0.629035	-1.79555	0.615319	0.649388	0.29276	0.290296	-0.9677	-0.201584	1.25104	-2.97471	0.045372	-3.6614	-0.849971	0.0227995	0.756253	-0.839992	-2.8023	0.162866	0.627114	-1.17029	0.118651	-2.93616	-1.66149	-0.464198	1.85495
878	-2.10339	0.230769	-2.29831	-0.58844	-1.25878	0.2028	-0.529086	-0.726408	-2.41682	-2.27838	-3.88378	0.950046	-2.12208	0.108321	-2.60588	-3.23801	-3.18534	-2.94557	-0.617449	-2.42746	-2.67798	-0.353233	0.0309086	-1.49933	-1.71576	0.272574	-2.79148	-0.0194197	-2.32522	-0.572831	-2.356	-1.24463	-0.351021	-2.06763	-0.29765	-0.612514	-2.61425	0.0329876	-1.73707	-2.22386	-1.12199	-1.03294	0.333552	-4.10604	-0.576589	-2.08559	-1.86533	-3.66743	0.296425
879	-0.695639	2.74371	0.765592	0.0805006	-2.1741	0.24353	-2.39956	-0.923478	-2.02923	-0.430035	-3.20872	-2.00689	-2.6589	-0.490788	-1.00355	-0.509273	-2.97583	-1.2888	-2.70036	1.59959	-0.486075	-2.64785	-1.88637	0.279504	-2.62674	0.0763102	-0.937739	0.956118	1.23394	-0.321782	-2.91	0.228475	0.571765	1.16897	-0.576172	-2.34859	-2.93102	-2.72593	0.570302	-2.74389	-0.66588	-2.30136	0.842505	0.146314	-1.94126	-2.09318	-2.95512	2.07648	-2.52701
880	-1.17172	0.701923	-2.10405	0.396316	-0.946064	0.174512	-2.62987	0.208236	-0.959233	-0.458914	-0.876044	0.863777	-2.7172	-2.96103	-0.810916	-1.46093	-1.25601	-0.958214	-1.51258	-0.0366197	-0.945142	-3.01963	-1.38375	0.244349	-0.695173	-1.06584	-0.901215	-0.300266	-0.814646	-0.123286	-0.728099	-0.937785	-1.00575	-1.17558	-0.0636826	-1.84172	-1.07208	-1.35855	0.264554	-1.00652	-0.34866	-0.411723	0.214381	-0.745285	-0.0782108	-1.14498	-1.16895	-0.345725	0.472541
881	0.99299	1.05881	0.85919	1.57075	1.09863	1.73133	0.456959	0.864975	1.21724	0.345522	0.680135	1.52069	0.544996	1.44889	0.549496	1.49892	0.974642	1.1501	1.18262	1.68537	0.992972	0.690814	1.01618	1.77142	0.850892	2.09235	0.637062	2.25361	1.20892	1.2885	0.555218	1.24494	1.77137	1.69828	0.746594	0.204096	1.12293	0.819119	2.42362	0.734786	1.23037	1.32296	2.05541	0.794546	1.29363	0.246016	0.212569	1.22644	2.39316
882	2.98334	3.30862	2.71741	3.54574	2.89146	3.91021	2.3425	2.83482	3.0294	2.33126	2.80661	3.6471	2.37312	3.28113	2.36302	3.35188	2.73609	2.99061	3.23476	3.64691	2.75798	2.65805	3.09716	4.05221	2.84746	3.67922	2.7972	4.13179	3.1198	3.39467	2.39309	3.28218	3.75211	4.0092	2.7218	2.30225	2.80699	2.80009	4.10033	2.56487	2.84527	3.11793	3.78585	2.58783	2.8765	2.14693	2.4388	3.11964	4.00782
883	0.925604	0.0776596	0.7599	0.251612	0.851504	0.609019	0.799691	-0.698892	0.640748	0.134638	-0.281197	0.682528	0.816353	-2.55876	0.701163	-3.16616	1.10946	0.872762	0.312571	0.918915	0.783054	-0.738784	0.066906	0.283354	0.946092	-0.286457	1.08903	-0.167376	1.20447	1.19605	0.506143	0.778445	0.473166	0.280064	0.483673	0.67104	1.35773	0.690787	0.243014	1.11249	-0.369972	1.29305	-0.140143	0.765604	0.876228	0.102433	0.0465546	1.23306	0.071579
884	3.53142	5.08558	3.51602	4.38479	3.22239	4.76799	2.71033	3.33664	3.46154	2.56937	3.51561	4.09719	3.04719	3.72986	2.70188	3.93307	2.99258	3.1597	3.78186	3.96115	2.71914	2.96792	3.33511	4.75795	3.24617	3.80186	3.34946	4.884	3.32115	3.90689	2.77866	3.86565	3.39762	4.37968	3.10067	2.67659	3.34716	3.222	4.84218	2.81651	3.13133	3.08174	4.59471	3.24265	3.4587	2.91748	3.16562	3.25767	4.58268
885	-1.2693	-1.01138	-1.89833	-0.994261	-1.57174	-0.874616	-2.59564	-2.84009	-0.94451	-2.61936	-0.933753	-0.792912	-1.60717	-0.955357	-1.61431	-0.949822	-2.62551	-1.39554	-2.65298	-0.887003	-1.39414	-1.66292	-1.93143	-1.37841	-1.51407	-0.617385	-1.82724	-0.247424	-0.909264	-0.39162	-3.44504	-0.378032	-1.34573	-1.0198	-1.16979	-3.87687	-1.51114	-1.61313	0.202429	-3.02911	-3.07664	-1.44451	-0.862568	-1.53977	-1.52306	-2.97658	-1.29854	-1.5249	-0.373033
886	0.221867	1.41475	0.213688	1.01501	0.411448	1.05994	0.252523	0.753872	0.206384	-0.114958	0.34193	1.1464	-0.2019	0.698774	-0.0108342	0.726804	0.192819	0.331266	0.802182	0.99755	0.193119	0.495861	0.69562	1.73861	0.417233	1.05506	0.644125	1.19255	0.80544	0.911289	0.379634	0.741284	1.17562	1.22454	0.629431	0.417274	0.213326	0.637204	1.15192	0.280252	1.0238	0.530868	1.41253	0.334899	0.810049	0.377748	0.08846	0.323809	1.18529
887	5.39011	6.65225	5.99683	4.91815	5.51169	4.34476	5.7348	5.54865	5.22626	4.47183	4.81312	2.35531	6.0885	4.53741	4.61932	6.32643	5.84054	5.50279	5.46629	5.25694	5.62033	5.22224	6.07591	5.69736	4.631	4.00191	6.37204	5.88887	5.68509	4.81328	5.63481	5.20781	3.82199	5.29223	4.6473	6.11605	5.95736	5.15129	4.69629	6.06435	3.75832	5.68653	5.66201	5.34333	4.42045	4.75137	5.18456	6.13861	4.0155
888	2.8873	3.51588	2.74796	3.64325	2.85448	3.50428	2.74421	3.26805	2.95222	2.5567	3.45278	3.73681	2.71452	3.37191	1.83695	3.25174	2.59701	3.15763	3.45074	3.73338	2.56812	3.26451	3.42815	3.78624	2.37101	3.64084	2.90466	3.49818	2.76922	3.27973	2.41668	3.17794	3.63075	3.24429	3.26235	2.52841	2.60175	2.94697	3.7065	2.49832	2.85184	3.09709	3.40807	2.96121	3.20654	2.35201	2.46357	2.8019	3.82919
889	-0.0921082	0.229958	-0.501588	0.32148	-0.301306	0.478424	-0.770296	-0.406788	-0.44911	-1.24161	-0.435117	0.176491	-0.39472	0.099287	-0.722549	0.0703311	-0.334008	-0.522813	-0.187932	0.328786	-0.322273	-0.666684	-0.511053	0.401705	-0.326655	0.699643	-0.422793	1.15755	-0.328551	0.0667381	-0.588992	0.396058	0.501085	0.146192	-1.11736	-0.879638	-0.620321	-0.526077	0.706348	-0.671289	-0.180696	-0.120027	0.937011	-0.653416	-0.376456	-0.72397	-0.953986	-0.396402	0.944343
890	1.05953	3.92042	1.071	1.82734	0.937624	1.71999	0.543564	0.971311	0.534719	0.651273	0.521451	3.14323	0.520008	1.38063	0.0726609	0.877347	0.983237	0.953803	0.74947	1.55121	0.967649	0.293496	0.592685	1.61513	1.0655	0.98831	0.757434	1.83858	1.02031	1.46915	0.551635	1.40569	1.18198	2.36772	0.657331	0.612715	0.681798	0.51138	2.27784	0.537184	0.66766	1.21323	1.90657	0.929654	0.658883	0.221295	0.312303	1.10099	1.89013
891	-2.63287	-0.731054	-2.24453	-0.841416	-2.24438	-0.172939	-2.16612	-1.85236	-1.66202	-2.33805	-2.6895	-1.68199	-2.58211	-2.00594	-3.64153	-1.92852	-2.39457	-1.87097	-3.03213	-1.52294	-2.98061	-2.52178	-2.39556	-1.42344	-2.04492	-1.79245	-2.26241	-1.17361	-1.93713	-0.84791	-2.70133	-2.00736	-3.31123	-0.39708	-1.4918	-2.83929	-2.41449	-3.01124	-1.37208	-3.11845	-3.26652	-1.90891	-1.24556	-3.3242	-3.06913	-2.01392	-2.91579	-1.2363	-1.76153
892	1.33647	0.302839	1.13126	0.500679	1.08501	0.558381	0.540252	0.0658646	1.0935	-0.11833	0.689366	0.450504	0.901077	0.171155	0.747197	0.345615	0.786063	0.620834	1.17861	0.839973	1.06211	-0.202031	0.871497	0.412247	1.0031	0.599019	0.867084	0.87099	1.10663	0.923538	0.854978	0.928746	0.273214	1.15758	0.20206	0.527494	1.00033	1.04364	0.826282	0.588518	0.0525351	0.557073	0.693385	0.603415	0.444698	0.913856	0.442119	0.833343	0.816294
893	0.811875	2.04339	0.505698	1.74933	1.57211	1.06059	0.0848789	0.767401	0.745163	-0.106456	0.425738	1.25525	-1.01198	0.803365	-0.608113	0.856283	-0.38343	0.576626	1.02667	0.8283	1.69185	0.891928	0.668866	1.19463	0.770796	0.977431	0.219858	2.22115	1.44637	1.01862	-1.80216	1.35309	0.952595	1.6307	0.383567	0.269792	-2.7099	0.604226	1.71105	0.108859	0.979747	0.0301895	1.92221	1.03773	0.762467	0.286808	-0.109508	0.683264	1.30531
894	2.79005	4.57175	2.60659	3.70089	2.79865	4.51479	2.95928	3.14993	3.51117	2.54614	3.51911	3.84542	3.28891	3.65425	2.30595	4.04185	3.07191	2.20692	4.10898	4.03497	3.53109	3.26474	3.70464	4.79353	2.64675	4.1196	3.34541	4.58305	3.87608	3.41153	3.24679	3.47678	4.79569	4.06487	3.10625	3.52998	3.33046	2.97845	4.96788	2.82964	3.82666	3.36935	4.5894	2.63707	3.40874	2.32551	2.78852	2.5425	4.07958
895	2.00324	3.55024	1.81935	2.62717	1.86279	2.68441	1.79939	2.36438	1.40656	1.53546	2.10261	2.60941	1.82097	2.14809	1.35258	2.12232	1.6665	1.92897	2.22109	2.69286	2.03377	1.93823	2.33246	3.5987	2.25556	2.97632	1.89708	2.47141	1.70631	2.24127	1.52939	2.42178	2.38246	2.96235	2.16644	1.57259	1.33973	1.49322	2.82846	1.38602	1.88378	2.04067	2.70894	1.80002	2.08431	1.52906	1.55341	1.63498	2.63557
896	1.43747	2.19241	1.48838	2.12441	1.3773	2.10332	1.2943	1.79627	1.41037	1.38097	1.65255	2.10802	0.982332	1.35425	0.58834	1.78869	1.07417	1.48007	1.80953	1.93159	1.26249	1.09587	1.53426	2.62258	1.61721	2.03012	1.47244	2.19635	1.8391	1.88703	1.0306	1.82745	2.05526	1.88562	1.52034	1.37065	0.804332	1.07907	2.31732	1.13101	1.46455	1.50206	2.09827	1.45787	1.48294	0.907565	0.991729	1.52055	2.5174
897	2.70754	2.66898	2.9584	3.09687	2.81462	3.42605	1.9319	1.95906	2.73074	1.8774	2.89275	3.4894	2.22738	3.94559	1.44901	3.89409	2.64033	2.92039	2.52284	3.32907	2.69865	3.09081	2.01833	3.37056	2.69785	3.90373	2.83266	4.02139	3.41957	2.95394	2.4313	2.31368	4.22919	2.2024	2.15255	1.95729	2.84732	2.45644	3.54377	2.17813	2.55035	2.85356	3.87645	2.63943	2.79593	1.78645	2.34754	2.32527	4.03342
898	0.167035	0.717765	0.336725	0.00891209	-0.0475383	-0.667409	-0.685536	0.155163	-0.447515	-0.616999	-1.24789	-0.236114	-0.893163	-0.137453	-0.978501	1.86316	-0.0460529	0.246526	-0.741638	0.229215	-0.0388832	-0.537996	-0.709344	2.43436	-0.23875	1.40982	-0.543581	1.68147	-0.22873	-1.4517	-1.3662	0.201497	0.875434	0.108124	-1.00005	-1.67079	-1.05461	-0.853751	0.585907	-0.410975	1.20561	-0.208985	0.426925	-0.975211	0.399331	-1.2372	-1.3031	0.092978	-0.576962
899	0.529223	-1.23618	0.319408	-1.30645	0.30431	-1.28897	-2.18112	-2.95022	-0.537975	-2.40947	-0.691877	-2.33048	-0.261864	-1.50049	-0.544694	-1.38186	-3.59433	-1.01651	-1.22046	-1.26104	0.288457	0.164108	-1.31998	-0.652627	0.431863	-1.90661	-0.257009	-1.24038	-0.398973	-0.768699	-0.434834	-0.0733337	-1.44276	0.142519	-2.18014	-1.35769	0.261493	-0.592038	-1.48298	-1.16581	-2.22205	-0.682975	-1.19221	-1.0362	-2.86597	-0.0701084	-0.239481	-0.551395	-1.16586
900	2.37584	3.47847	1.98608	2.89958	2.17434	3.05178	1.94004	2.36616	2.21354	1.85614	2.13634	2.65641	1.86196	2.51794	1.72765	2.60902	2.15882	2.15307	2.38352	2.91258	2.31161	1.93013	2.46462	3.23677	2.1119	2.96847	2.21441	3.32886	2.39102	2.64678	1.74093	2.70147	2.59997	3.09231	2.19283	1.71844	2.02186	2.15661	3.203	1.66504	2.18763	2.49927	3.14575	2.02204	2.2627	1.82969	1.97549	2.40766	2.90517
901	1.00687	0.994626	0.646007	1.24296	0.542204	1.22955	0.314827	1.04778	0.62204	0.197536	0.132989	1.0078	-0.151196	0.666023	0.233481	0.961808	0.585827	0.659776	0.698411	1.44048	0.504024	0.279771	0.617824	1.78498	0.455502	1.50558	0.620089	1.53716	0.864081	1.01563	0.133693	0.851357	1.40111	1.69253	0.450156	0.142683	0.415802	0.439611	1.77274	0.232166	0.646834	0.80399	1.19307	0.255652	0.65803	-0.294605	-0.00712395	0.582805	1.39556
902	0.361178	-1.93969	-0.0280395	-0.584902	0.0209346	-0.44072	-0.536464	-0.462289	-0.292836	-0.733709	-0.502617	-1.50095	-0.168612	-0.850218	0.053309	-0.773579	0.271764	-0.497101	-0.272177	-0.327889	0.172726	-1.89316	0.0766983	-0.696692	0.523451	-0.141376	-0.00678396	-0.517631	0.752643	-0.313279	-0.382453	0.317926	-0.187698	-0.549026	-0.82478	-0.394839	-0.259884	-0.0647144	-0.0118713	-0.331325	-1.07307	-0.0629511	-0.441411	-0.291925	-0.875347	-0.383698	-0.620832	0.0527625	-0.386297
903	1.03344	6.15292	3.06185	6.15449	3.40622	4.55706	2.77373	2.97952	3.79863	5.77206	4.5059	5.20762	2.94408	2.49907	2.67196	3.73565	2.27319	5.4006	1.40955	4.09775	1.67929	5.12658	1.03288	2.58947	0.447563	2.35458	3.43766	3.07195	1.44751	1.9497	2.67701	4.40506	2.10638	2.45625	3.48089	1.7011	3.22118	0.69545	2.62991	2.50437	7.97191	3.665	2.65481	5.52269	2.16282	1.96417	3.02095	4.10061	2.0835
904	2.51673	1.53023	2.11132	3.47199	2.29157	3.7142	2.12746	2.46079	2.67224	1.77857	2.41384	3.12603	1.40489	2.51213	1.34698	2.84243	1.68816	2.39483	2.95672	2.95864	1.88086	1.97135	2.67844	3.62377	2.11773	2.78519	1.80598	3.87149	1.81643	2.71663	1.8113	3.14253	2.80194	3.21319	2.26188	2.37793	1.68528	2.19122	3.6401	2.05927	2.4901	2.27231	3.382	2.20018	2.74258	1.29894	1.72534	2.5479	3.37437
905	1.12681	-0.489337	1.1615	0.492112	1.6237	0.715568	0.681157	0.548176	1.11368	0.240289	0.306833	0.42968	0.917315	0.40904	0.96084	0.475307	0.995172	0.886167	1.51883	1.27154	1.0046	-0.141739	1.36898	1.33407	1.08618	0.248918	0.926922	0.304166	1.22253	1.19682	0.545299	0.661112	0.197232	0.275233	0.346902	0.639737	1.25333	1.47729	0.650227	0.800162	0.101847	0.801693	0.195298	0.77668	0.757187	0.757087	0.645209	1.12592	0.41933
906	0.111877	1.98606	0.366428	1.12604	0.104469	0.812798	-0.0648069	1.0985	0.470148	1.12586	0.756088	1.51666	0.0555286	0.0380268	-0.292924	0.947411	-0.00533009	0.558525	1.16854	1.08387	0.0870247	0.0925479	0.515326	1.10922	-0.194228	0.643586	0.880722	0.493655	0.319003	0.461707	-0.294707	0.671981	0.870539	-0.16999	0.568471	0.0887079	0.123484	0.623875	1.15709	0.21688	0.557881	0.926296	0.50256	0.133851	1.05954	-0.472631	0.0943308	0.289857	0.755288
[truncated: 5,486 more rows]
[truncated: 16 more columns]
