# Supplementary material for: Spatial proteomics of ovarian cancer precursors delineates early disease changes and drug targets
Source: Mol Syst Biol. 2025 Nov 13;22(1):7–41. doi: 10.1038/s44320-025-00168-4 (PMC12759074; doi:10.1038/s44320-025-00168-4)
Supplement: Supplementary file 23 — Dataset EV17 [file 44320_2025_168_MOESM23_ESM.xlsx]

## Sheet: Legend
Dataset EV17. Student's t-test results used for differential abundance analysis of STIC and secretory NFTE and visualized in the volcano plot figure 6A.

## Sheet: Datset EV17
Genes	Protein Group	Protein Ids	Protein Names	First Protein Description	T-test difference (STIC vs Secretory FTE, log2)	T-test statistic	T-test p-value, (-log10)	T-test q-value, (-log10)
NUDT4B	A0A024RBG1	A0A024RBG1	NUD4B_HUMAN	Diphosphoinositol polyphosphate phosphohydrolase NUDT4B	-0.459181	-2.12565	1.4146	0.273854
IGKV3-7	A0A075B6H7	A0A075B6H7;A0A0C4DH90;A0A0C4DH55;P01624	KV37_HUMAN	Probable non-functional immunoglobulin kappa variable 3-7	-0.510295	-0.850034	0.398638	0.70044
IGLV7-46	A0A075B6I9	A0A075B6I9	LV746_HUMAN	Immunoglobulin lambda variable 7-46	-0.323854	-0.96358	0.468657	0.657605
IGLV3-10	A0A075B6K4	A0A075B6K4;A0A075B6K0	LV310_HUMAN	Immunoglobulin lambda variable 3-10	-0.116266	-0.300039	0.116117	0.907328
IGKV2-28;IGKV2D-28	A0A075B6P5;P01615	A0A075B6P5;P01615	KV228_HUMAN;KVD28_HUMAN	Immunoglobulin kappa variable 2-28	-0.364265	-1.23978	0.655911	0.552916
IGKV2-24;IGKV2D-24	A0A075B6R9;A0A0C4DH68	A0A075B6R9;A0A0C4DH68	KV224_HUMAN;KVD24_HUMAN	Probable non-functional immunoglobulin kappa variable 2D-24	-0.633571	-1.08128	0.54552	0.611836
IGHV3OR16-12	A0A075B7B8	A0A075B7B8	A0A075B7B8_HUMAN	Immunoglobulin heavy variable 3/OR16-12 (non-functional) (Fragment)	-0.411128	-1.21339	0.636989	0.562056
IGHV1OR15-1	A0A075B7D0	A0A075B7D0	A0A075B7D0_HUMAN	Immunoglobulin heavy variable 1/OR15-1 (non-functional) (Fragment)	-0.559596	-1.02655	0.509239	0.634636
IGKV3D-15	A0A087WSY6	A0A087WSY6	KVD15_HUMAN	Immunoglobulin kappa variable 3D-15	-0.30793	-0.864044	0.407057	0.694722
IGKV2-40;IGKV2D-40	A0A087WW87;P01614	P01614;A0A087WW87	KV240_HUMAN;KVD40_HUMAN	Immunoglobulin kappa variable 2-40	0.288828	1.18884	0.619572	0.571693
CCDC187	A0A096LP49	A0A096LP49	CC187_HUMAN	Coiled-coil domain-containing protein 187	-0.0257783	-0.0750456	0.0266514	0.974936
IGKV3-11;IGKV3D-11	A0A0A0MRZ8;P04433	A0A0A0MRZ8;P04433	KV311_HUMAN;KVD11_HUMAN	Immunoglobulin kappa variable 3D-11	0.584546	1.34689	0.73497	0.516662
IGHV3-49	A0A0A0MS15	A0A0B4J1V6;A0A0A0MS15	HV349_HUMAN	Immunoglobulin heavy variable 3-49	-0.532372	-1.5574	0.90072	0.440454
IGHV6-1	A0A0B4J1U7	A0A0B4J1U7	HV601_HUMAN	Immunoglobulin heavy variable 6-1	-0.334924	-0.88395	0.419127	0.686701
IGHV3-15	A0A0B4J1V0	A0A0B4J1V0	HV315_HUMAN	Immunoglobulin heavy variable 3-15	0.0730236	0.170589	0.0628657	0.947306
IGHV3-43	A0A0B4J1X8	A0A0B4J1X8	HV343_HUMAN	Immunoglobulin heavy variable 3-43	-0.43039	-1.43181	0.80019	0.487563
IGHV3-72	A0A0B4J1Y9	A0A0B4J1Y9	HV372_HUMAN	Immunoglobulin heavy variable 3-72	-0.784687	-1.30858	0.706281	0.529069
GATD3;GATD3B	A0A0B4J2D5;P0DPI2	P0DPI2;A0A0B4J2D5	GAL3A_HUMAN;GAL3B_HUMAN	Putative glutamine amidotransferase-like class 1 domain-containing protein 3B, mitochondrial	-0.0797095	-0.431869	0.175423	0.859647
IGKV3D-20	A0A0C4DH25	A0A0C4DH25	KVD20_HUMAN	Immunoglobulin kappa variable 3D-20	0.0548785	0.13275	0.0482138	0.958905
IGHV1-18	A0A0C4DH31	A0A0C4DH31	HV118_HUMAN	Immunoglobulin heavy variable 1-18	-0.388442	-1.16521	0.602994	0.581112
IGHV3-35	A0A0C4DH35	A0A0C4DH35	HV335_HUMAN	Probable non-functional immunoglobulin heavy variable 3-35	-0.230033	-0.920486	0.441605	0.673629
IGHV5-51	A0A0C4DH38	A0A0C4DH38	HV551_HUMAN	Immunoglobulin heavy variable 5-51	-0.236889	-0.805137	0.372068	0.717921
IGHV4-30-4;IGHV4-34;IGHV4-38-2;IGHV4-39;IGHV4-59;IGHV4-61	A0A0C4DH41;P01824;P01825;P06331;P0DP06;P0DP08	P0DP06;P0DP08;P01824;P01825;A0A0C4DH41;A0A0J9YWU9;P06331	HV434_HUMAN;HV439_HUMAN;HV459_HUMAN;HV461_HUMAN;HVD34_HUMAN;HVD82_HUMAN	Immunoglobulin heavy variable 4-61	-0.416171	-1.61618	0.949431	0.420836
	A0A0G2JRQ6	A0A0G2JRQ6	A0A0G2JRQ6_HUMAN	Ig-like domain-containing protein (Fragment)	-0.280706	-0.873357	0.412689	0.690707
IGHV3-64D	A0A0J9YX35	A0A0J9YX35	HV64D_HUMAN	Immunoglobulin heavy variable 3-64D	-0.542104	-1.74006	1.05551	0.382096
IGHV5-10-1	A0A0J9YXX1	A0A0J9YXX1	HV5X1_HUMAN	Immunoglobulin heavy variable 5-10-1	0.201463	0.567065	0.241688	0.807397
GNG5B	A0A804HLA8	A0A804HLA8;P63218	GBG5B_HUMAN	Guanine nucleotide-binding protein G(I)/G(S)/G(O) subunit gamma-5B	-0.0480934	-0.171334	0.0631582	0.94718
LOC400499	A0A8Q3SIG1	A0A8Q3SIG1	A0A8Q3SIG1_HUMAN	Vitellogenin domain-containing protein	-0.00612364	-0.0283998	0.00990262	0.990377
RBM47	A0AV96	A0AV96	RBM47_HUMAN	RNA-binding protein 47	-0.569615	-5.85168	6.42969	0.000803347
IFT56	A0AVF1	A0AVF1	IFT56_HUMAN	Intraflagellar transport protein 56	-0.815132	-5.85566	6.43585	0.000810127
TMEM129	A0AVI4	A0AVI4	TM129_HUMAN	E3 ubiquitin-protein ligase TM129	-0.018683	-0.114158	0.041164	0.963239
UBA6	A0AVT1	A0AVT1	UBA6_HUMAN	Ubiquitin-like modifier-activating enzyme 6	-0.112603	-1.09198	0.552728	0.608231
ESYT2	A0FGR8	A0FGR8	ESYT2_HUMAN	Extended synaptotagmin-2	-0.100558	-1.09195	0.552704	0.608131
SHTN1	A0MZ66	A0MZ66	SHOT1_HUMAN	Shootin-1	-0.0428937	-0.291757	0.112563	0.910603
TMEM223	A0PJW6	A0PJW6	TM223_HUMAN	Transmembrane protein 223	0.123727	0.74301	0.336344	0.742812
DAPL1	A0PJW8	A0PJW8	DAPL1_HUMAN	Death-associated protein-like 1	-1.34378	-3.08196	2.4761	0.100065
ARHGAP10	A1A4S6	A1A4S6	RHG10_HUMAN	Rho GTPase-activating protein 10	-0.600804	-3.17308	2.58843	0.0894291
ANO9	A1A5B4	A1A5B4	ANO9_HUMAN	Anoctamin-9	-0.472458	-1.66898	0.994081	0.404151
BICDL2	A1A5D9	A1A5D9	BICL2_HUMAN	BICD family-like cargo adapter 2	-0.903259	-3.49662	3.0008	0.0580261
ARHGEF37	A1IGU5	A1IGU5	ARH37_HUMAN	Rho guanine nucleotide exchange factor 37	-1.07182	-5.12341	5.31451	0.00385
MEX3A	A1L020	Q86XN8;Q6ZN04;Q5U5Q3;A1L020	MEX3A_HUMAN	RNA-binding protein MEX3A	0.948583	3.78735	3.38772	0.0379626
ILVBL	A1L0T0	A1L0T0	HACL2_HUMAN	2-hydroxyacyl-CoA lyase 2	-0.0381127	-0.289398	0.111555	0.910648
C1orf226	A1L170	A1L170	CA226_HUMAN	Uncharacterized protein C1orf226	0.785886	2.67358	1.99524	0.160035
PLEKHG3	A1L390	A1L390	PKHG3_HUMAN	Pleckstrin homology domain-containing family G member 3	-0.267072	-3.53527	3.05138	0.0550309
SH3PXD2B	A1X283	A1X283	SPD2B_HUMAN	SH3 and PX domain-containing protein 2B	0.17257	1.63255	0.963186	0.41492
CIBAR1	A1XBS5	A1XBS5	CBAR1_HUMAN	CBY1-interacting BAR domain-containing protein 1	-1.19788	-6.08101	6.78573	0.000663102
MACROD2	A1Z1Q3	A1Z1Q3	MACD2_HUMAN	ADP-ribose glycohydrolase MACROD2	-0.811584	-4.93061	5.02494	0.00528541
CCDC78	A2IDD5	A2IDD5	CCD78_HUMAN	Coiled-coil domain-containing protein 78	-1.96759	-9.09321	11.4484	0
NBAS	A2RRP1	A2RRP1	NBAS_HUMAN	NBAS subunit of NRZ tethering complex	-0.158161	-2.7348	2.06486	0.150768
TARS3	A2RTX5	A2RTX5	SYTC2_HUMAN	Threonine--tRNA ligase 2, cytoplasmic	-0.654806	-4.21305	3.97835	0.0192675
TYW5	A2RUC4	A2RUC4	TYW5_HUMAN	tRNA wybutosine-synthesizing protein 5	0.143889	1.61576	0.949085	0.420944
DENND3	A2RUS2	A2RUS2	DEND3_HUMAN	DENN domain-containing protein 3	-0.363391	-2.11366	1.40279	0.276542
DCDC2B	A2VCK2	A2VCK2	DCD2B_HUMAN	Doublecortin domain-containing protein 2B	-1.13992	-3.95038	3.61077	0.0295055
VWA8	A3KMH1	A3KMH1	VWA8_HUMAN	von Willebrand factor A domain-containing protein 8	0.0386529	0.263303	0.100508	0.919591
SBNO1	A3KN83	A3KN83	SBNO1_HUMAN	Protein strawberry notch homolog 1	0.0938012	0.787004	0.361516	0.726353
CRPPA	A4D126	A4D126	ISPD_HUMAN	D-ribitol-5-phosphate cytidylyltransferase	-0.415391	-1.45121	0.815401	0.480796
GTPBP10	A4D1E9	A4D1E9	GTPBA_HUMAN	GTP-binding protein 10	0.282168	2.08197	1.37178	0.284688
WDR91	A4D1P6	A4D1P6	WDR91_HUMAN	WD repeat-containing protein 91	-0.63499	-5.61694	6.06724	0.00130201
DENND11	A4D1U4	A4D1U4	DEN11_HUMAN	DENN domain-containing protein 11	0.285272	2.18956	1.4782	0.258836
MBLAC1	A4D2B0	A4D2B0	MBLC1_HUMAN	Metallo-beta-lactamase domain-containing protein 1	-0.64903	-2.28889	1.57928	0.237081
MTMR11	A4FU01	A4FU01	MTMRB_HUMAN	Myotubularin-related protein 11	0.107119	0.221452	0.0832079	0.931598
CFAP90	A4QMS7	A4QMS7	CFA90_HUMAN	Cilia- and flagella-associated protein 90	-0.983845	-3.46795	2.96344	0.0601335
VPS37C	A5D8V6	A5D8V6	VP37C_HUMAN	Vacuolar protein sorting-associated protein 37C	-0.502988	-3.19399	2.61446	0.0870871
ODAD3	A5D8V7	A5D8V7	ODAD3_HUMAN	Outer dynein arm-docking complex subunit 3	-2.22136	-6.30759	7.13886	0.000352201
TRAPPC13	A5PLN9	A5PLN9	TPC13_HUMAN	Trafficking protein particle complex subunit 13	-0.252107	-1.8415	1.14579	0.351125
CNOT1	A5YKK6	A5YKK6	CNOT1_HUMAN	CCR4-NOT transcription complex subunit 1	-0.0862547	-1.08345	0.54698	0.61129
CDHR4	A6H8M9	A6H8M9	CDHR4_HUMAN	Cadherin-related family member 4	-1.70106	-8.93864	11.2152	0
PALM3	A6NDB9	A6NDB9	PALM3_HUMAN	Paralemmin-3	-0.405384	-1.53762	0.884566	0.448273
PGP	A6NDG6	A6NDG6	PGP_HUMAN	Glycerol-3-phosphate phosphatase	0.586356	4.09828	3.81656	0.0231893
RIMOC1	A6NDU8	A6NDU8	RIMC1_HUMAN	RAB7A-interacting MON1-CCZ1 complex subunit 1	0.0551304	0.331975	0.130008	0.896733
RCCD1	A6NED2	A6NED2	RCCD1_HUMAN	RCC1 domain-containing protein 1	-0.548765	-3.56606	3.09187	0.0527412
ZNF316	A6NFI3	A6NFI3	ZN316_HUMAN	Zinc finger protein 316	-0.195243	-1.79993	1.10843	0.363775
CFAP73	A6NFT4	A6NFT4	CFA73_HUMAN	Cilia- and flagella-associated protein 73	-1.5414	-6.07249	6.77246	0.000673684
CCDC160	A6NGH7	A6NGH7	CC160_HUMAN	Coiled-coil domain-containing protein 160	0.228505	1.45033	0.814711	0.481071
MROH6	A6NGR9	A6NGR9	MROH6_HUMAN	Maestro heat-like repeat-containing protein family member 6	-0.345748	-1.57812	0.917776	0.434311
TUBAL3	A6NHL2	A6NHL2	TBAL3_HUMAN	Tubulin alpha chain-like 3	-0.0727576	-0.438437	0.178514	0.857074
SMCHD1	A6NHR9	A6NHR9	SMHD1_HUMAN	Structural maintenance of chromosomes flexible hinge domain-containing protein 1	0.207645	1.98675	1.28031	0.310208
UNC119B	A6NIH7	A6NIH7;Q13432	U119B_HUMAN	Protein unc-119 homolog B	-0.618782	-4.66849	4.63638	0.00865597
METTL15	A6NJ78	A6NJ78	MET15_HUMAN	12S rRNA N4-methylcytidine (m4C) methyltransferase	-0.174437	-1.28767	0.69082	0.536916
LIPT2	A6NK58	A6NK58	LIPT2_HUMAN	Putative lipoyltransferase 2, mitochondrial	-0.0782184	-0.383325	0.15298	0.878045
RASSF10	A6NK89	A6NK89	RASFA_HUMAN	Ras association domain-containing protein 10	-0.536699	-1.79013	1.09969	0.366748
CCDC85C	A6NKD9	A6NKD9	CC85C_HUMAN	Coiled-coil domain-containing protein 85C	-0.266809	-1.2976	0.698146	0.532463
ZFP92	A6NM28	A6NM28	ZFP92_HUMAN	Zinc finger protein 92 homolog	-0.299753	-1.67265	0.997219	0.403753
SNTN	A6NMZ2	A6NMZ2	SNTAN_HUMAN	Sentan	-1.64657	-5.7602	6.28817	0.000902256
COL6A6	A6NMZ7	A6NMZ7	CO6A6_HUMAN	Collagen alpha-6(VI) chain	-0.13428	-0.417007	0.168477	0.865586
LRRIQ3	A6PVS8	A6PVS8	LRIQ3_HUMAN	Leucine-rich repeat and IQ domain-containing protein 3	-1.08705	-2.77435	2.1103	0.14401
C4orf47	A7E2U8	A7E2U8	CD047_HUMAN	UPF0602 protein C4orf47	-0.623716	-2.28889	1.57928	0.236989
ZSWIM8	A7E2V4	A7E2V4	ZSWM8_HUMAN	Zinc finger SWIM domain-containing protein 8	-0.0843086	-0.618654	0.268449	0.789751
ARHGAP32	A7KAX9	A7KAX9	RHG32_HUMAN	Rho GTPase-activating protein 32	-0.638602	-4.1488	3.88756	0.0213485
POM121C	A8CG34	Q96HA1;A6NF01;A8CG34	P121C_HUMAN	Nuclear envelope pore membrane protein POM 121C	0.0950772	1.41436	0.786602	0.493487
A2ML1	A8K2U0	A8K2U0	A2ML1_HUMAN	Alpha-2-macroglobulin-like protein 1	0.676158	1.45627	0.819392	0.479264
EFCAB7	A8K855	A8K855	EFCB7_HUMAN	EF-hand calcium-binding domain-containing protein 7	-0.209365	-0.671306	0.29661	0.770999
DDX11L8	A8MPP1	A8MPP1;Q96FC9;Q92771	D11L8_HUMAN	Putative ATP-dependent RNA helicase DDX11-like protein 8	0.884578	3.79495	3.39803	0.0375699
YDJC	A8MPS7	A8MPS7	YDJC_HUMAN	Carbohydrate deacetylase	-1.11506	-5.91422	6.52662	0.000796296
ZBBX	A8MT70	A8MT70	ZBBX_HUMAN	Zinc finger B-box domain-containing protein 1	-0.92127	-4.47496	4.35387	0.0120748
FAM166B	A8MTA8	A8MTA8	F166B_HUMAN	Protein FAM166B	-1.8781	-5.42366	5.77074	0.002
FAM171A2	A8MVW0	A8MVW0	F1712_HUMAN	Protein FAM171A2	0.224101	1.34099	0.730527	0.517965
PHF20L1	A8MW92	A8MW92	P20L1_HUMAN	PHD finger protein 20-like protein 1	-0.0280934	-0.0854458	0.0304684	0.972169
SNRPG;SNRPGP15	A8MWD9;P62308	A8MWD9;P62308	RUXGL_HUMAN;RUXG_HUMAN	Putative small nuclear ribonucleoprotein G-like protein 15	-0.0886013	-0.576193	0.246364	0.804191
NUDT19	A8MXV4	A8MXV4	NUD19_HUMAN	Acyl-coenzyme A diphosphatase NUDT19	0.591275	2.44281	1.74114	0.203454
TTC34	A8MYJ7	A8MYJ7	TTC34_HUMAN	Tetratricopeptide repeat protein 34	-1.04101	-4.40987	4.25978	0.0133254
ODF3B	A8MYP8	A8MYP8	ODF3B_HUMAN	Outer dense fiber protein 3B	-3.8711	-9.69523	12.3461	0
KPNA7	A9QM74	A9QM74	IMA8_HUMAN	Importin subunit alpha-8	1.23947	4.66725	4.63457	0.00863233
MIF4GD	A9UHW6	A9UHW6	MI4GD_HUMAN	MIF4G domain-containing protein	-0.315553	-2.75254	2.0852	0.147665
MYO1G	B0I1T2	B0I1T2	MYO1G_HUMAN	Unconventional myosin-Ig	-0.46145	-2.0205	1.31244	0.3002
FHAD1	B1AJZ9	B1AJZ9	FHAD1_HUMAN	Forkhead-associated domain-containing protein 1	-1.41846	-5.38064	5.70502	0.00216812
ESPN	B1AK53	B1AK53	ESPN_HUMAN	Espin	-0.137627	-0.621726	0.270069	0.789021
GPR89A;GPR89B	B7ZAQ6;P0CG08	P0CG08;B7ZAQ6	GPHRA_HUMAN;GPHRB_HUMAN	Golgi pH regulator A	0.0268849	0.200779	0.0748499	0.93846
PPP1R3G	B7ZBB8	B7ZBB8	PP13G_HUMAN	Protein phosphatase 1 regulatory subunit 3G	-0.995734	-2.68299	2.00588	0.158452
HNRNPCL1;HNRNPCL3;HNRNPCL4	B7ZW38;O60812;P0DMR1	B7ZW38;O60812;P0DMR1	HNRC1_HUMAN;HNRC3_HUMAN;HNRC4_HUMAN	Heterogeneous nuclear ribonucleoprotein C-like 3	-0.201022	-1.13413	0.581451	0.59297
IGLL5	B9A064	P0CF74;P0DOY2;B9A064;A0M8Q6;P0CG04	IGLL5_HUMAN	Immunoglobulin lambda-like polypeptide 5	-0.32337	-0.962575	0.468019	0.6578
WASH2P;WASH3P	C4AMC7;Q6VEQ5	C4AMC7;A8K0Z3;Q6VEQ5;Q9NQA3;A8MWX3	WASH2_HUMAN;WASH3_HUMAN	Putative WAS protein family homolog 3	-0.326568	-4.187	3.94148	0.0200466
UMAD1	C9J7I0	C9J7I0	UMAD1_HUMAN	UBAP1-MVB12-associated (UMA)-domain containing protein 1	-0.60813	-4.44682	4.31312	0.0127766
TMEM238	C9JI98	C9JI98	TM238_HUMAN	Transmembrane protein 238	-0.765834	-2.07211	1.36219	0.286527
MCRIP1	C9JLW8	C9JLW8	MCRI1_HUMAN	Mapk-regulated corepressor-interacting protein 1	0.127376	0.925774	0.444893	0.671149
CFAP99	D6REC4	D6REC4	CFA99_HUMAN	Cilia- and flagella-associated protein 99	-0.150037	-0.473631	0.195299	0.845413
ANKRD65	E5RJM6	E5RJM6	ANR65_HUMAN	Ankyrin repeat domain-containing protein 65	-2.00662	-6.57678	7.55952	0.000125
PROB1	E7EW31	E7EW31	PROB1_HUMAN	Proline-rich basic protein 1	-0.550365	-1.22455	0.644967	0.557705
NACA	E9PAV3	E9PAV3	NACAM_HUMAN	Nascent polypeptide-associated complex subunit alpha, muscle-specific form	-0.139064	-1.02698	0.509517	0.634459
C11orf98	E9PRG8	E9PRG8	CK098_HUMAN	Uncharacterized protein C11orf98	-0.0799487	-0.557702	0.236919	0.811256
STMND1	H3BQB6	H3BQB6	STMD1_HUMAN	Stathmin domain-containing protein 1	-1.40941	-3.4172	2.8977	0.0645719
PIERCE2	H3BRN8	H3BRN8	PIRC2_HUMAN	Piercer of microtubule wall 2 protein	-0.667832	-3.56443	3.08973	0.052815
CROCC2	H7BZ55	H7BZ55	CRCC2_HUMAN	Ciliary rootlet coiled-coil protein 2	-1.50846	-3.6621	3.21925	0.0461412
ASDURF	L0R819	L0R819	ASURF_HUMAN	ASNSD1 upstream open reading frame protein	-0.131869	-0.581998	0.24935	0.803216
DCDC1	M0R2J8	M0R2J8	DCDC1_HUMAN	Doublecortin domain-containing protein 1	-1.44535	-4.22763	3.99904	0.018626
DNASE2	O00115	O00115	DNS2A_HUMAN	Deoxyribonuclease-2-alpha	0.430027	2.42237	1.71929	0.208269
AGPS	O00116	O00116	ADAS_HUMAN	Alkyldihydroxyacetonephosphate synthase, peroxisomal	0.348762	2.37243	1.66636	0.218025
KIF2A	O00139	O00139	KIF2A_HUMAN	Kinesin-like protein KIF2A	-0.131854	-1.0322	0.51294	0.633336
TK2	O00142	O00142	KITM_HUMAN	Thymidine kinase 2, mitochondrial	-0.755343	-4.76195	4.7742	0.00719245
DDX39A	O00148	O00148	DX39A_HUMAN	ATP-dependent RNA helicase DDX39A	1.07188	3.95784	3.62108	0.0292164
PDLIM1	O00151	O00151	PDLI1_HUMAN	PDZ and LIM domain protein 1	-0.124856	-0.844763	0.395485	0.702959
ACOT7	O00154	O00154	BACH_HUMAN	Cytosolic acyl coenzyme A thioester hydrolase	0.959899	4.35717	4.18396	0.0147746
MYO1C	O00159	O00159	MYO1C_HUMAN	Unconventional myosin-Ic	-0.585806	-3.48344	2.98361	0.0589363
MYO1F	O00160	O00160	MYO1F_HUMAN	Unconventional myosin-If	-0.666526	-2.83292	2.1783	0.13469
SNAP23	O00161	O00161	SNP23_HUMAN	Synaptosomal-associated protein 23	-0.32028	-2.66302	1.98332	0.161942
HAX1	O00165	O00165	HAX1_HUMAN	HCLS1-associated protein X-1	0.240466	1.58196	0.920948	0.432851
EYA2	O00167	O00167	EYA2_HUMAN	Eyes absent homolog 2	0.393828	1.74488	1.05973	0.380966
FXYD1	O00168	O00168	PLM_HUMAN	Phospholemman	-1.828	-3.45335	2.94449	0.0615722
AIP	O00170	O00170	AIP_HUMAN	AH receptor-interacting protein	-0.0488607	-0.531005	0.223468	0.821692
GTPBP1	O00178	O00178	GTPB1_HUMAN	GTP-binding protein 1	-0.72985	-7.07035	8.33182	4.49438e-05
LGALS9	O00182	O00182	LEG9_HUMAN	Galectin-9	-0.796849	-4.02009	3.70737	0.0261864
STXBP3	O00186	O00186	STXB3_HUMAN	Syntaxin-binding protein 3	-0.290972	-3.0537	2.44162	0.103309
ARVCF	O00192	O00192	ARVC_HUMAN	Splicing regulator ARVCF	0.195117	1.06063	0.53172	0.620697
SMAP	O00193	O00193	SMAP_HUMAN	Small acidic protein	-0.00811619	-0.0548881	0.0193394	0.982915
RAB27B	O00194	O00194	RB27B_HUMAN	Ras-related protein Rab-27B	-0.594198	-2.28873	1.57912	0.23686
AP3B1	O00203	Q13367;O00203	AP3B1_HUMAN	AP-3 complex subunit beta-1	-0.503777	-7.02787	8.26538	4.12371e-05
APBB1	O00213	O00213	APBB1_HUMAN	Amyloid beta precursor protein binding family B member 1	-1.22017	-5.39402	5.72546	0.00208746
LGALS8	O00214	O00214	LEG8_HUMAN	Galectin-8	-0.49357	-2.81106	2.15283	0.138092
NDUFS8	O00217	O00217	NDUS8_HUMAN	NADH dehydrogenase [ubiquinone] iron-sulfur protein 8, mitochondrial	-0.402732	-2.93776	2.30198	0.119063
NFKBIE	O00221	O00221	IKBE_HUMAN	NF-kappa-B inhibitor epsilon	-0.700672	-4.35365	4.1789	0.0148802
PSMD11	O00231	O00231	PSD11_HUMAN	26S proteasome non-ATPase regulatory subunit 11	-0.21863	-2.48717	1.78894	0.194136
PSMD12	O00232	O00232	PSD12_HUMAN	26S proteasome non-ATPase regulatory subunit 12	-0.20103	-2.29346	1.584	0.23585
PSMD9	O00233	O00233	PSMD9_HUMAN	26S proteasome non-ATPase regulatory subunit 9	0.017879	0.187128	0.0693984	0.941987
ATOX1	O00244	O00244	ATOX1_HUMAN	Copper transport protein ATOX1	-0.200756	-1.64519	0.973859	0.410827
MEN1	O00255	O00255	MEN1_HUMAN	Menin	-0.232401	-2.00944	1.30187	0.302894
CBX4	O00257	O00257	CBX4_HUMAN	E3 SUMO-protein ligase CBX4	-0.273733	-0.985643	0.482733	0.648522
GET1	O00258	O00258	GET1_HUMAN	Guided entry of tail-anchored proteins factor 1	-0.285223	-2.22088	1.50978	0.251922
PGRMC1	O00264	O00264	PGRC1_HUMAN	Membrane-associated progesterone receptor component 1	-0.382851	-3.45922	2.9521	0.0610261
SUPT5H	O00267	O00267	SPT5H_HUMAN	Transcription elongation factor SPT5	0.114561	0.736253	0.332531	0.745986
TAF4	O00268	O00268	TAF4_HUMAN	Transcription initiation factor TFIID subunit 4	0.192759	1.78218	1.09263	0.369507
DFFA	O00273	O00273	DFFA_HUMAN	DNA fragmentation factor subunit alpha	-0.183714	-1.71698	1.0354	0.389326
RFXAP	O00287	O00287	RFXAP_HUMAN	Regulatory factor X-associated protein	-0.188445	-2.16808	1.4567	0.263749
HIP1	O00291	O00291	HIP1_HUMAN	Huntingtin-interacting protein 1	0.174202	1.67228	0.996901	0.403752
CLIC1	O00299	O00299	CLIC1_HUMAN	Chloride intracellular channel protein 1	0.0335262	0.236867	0.0895208	0.926788
EIF3F	O00303	O00303	EIF3F_HUMAN	Eukaryotic translation initiation factor 3 subunit F	-0.129714	-1.18309	0.615523	0.573326
WWP2	O00308	O00308	WWP2_HUMAN	NEDD4-like E3 ubiquitin-protein ligase WWP2	-0.431046	-2.90604	2.26429	0.123684
PIK3CD	O00329	O00329	PK3CD_HUMAN	Phosphatidylinositol 4,5-bisphosphate 3-kinase catalytic subunit delta isoform	-0.477402	-2.67407	1.99579	0.160092
PDHX	O00330	O00330	ODPX_HUMAN	Pyruvate dehydrogenase protein X component, mitochondrial	0.340557	2.01846	1.31049	0.300679
SULT1C2	O00338	O00338	ST1C2_HUMAN	Sulfotransferase 1C2	0.276895	0.989974	0.485514	0.646948
MATN2	O00339	O00339	MATN2_HUMAN	Matrilin-2	-0.356986	-1.36962	0.752207	0.507898
QSOX1	O00391	O00391	QSOX1_HUMAN	Sulfhydryl oxidase 1	0.282255	2.45848	1.75797	0.200308
DCTN6	O00399	O00399	DCTN6_HUMAN	Dynactin subunit 6	0.180317	0.685713	0.304465	0.765313
SLC33A1	O00400	O00400	ACATN_HUMAN	Acetyl-coenzyme A transporter 1	-0.128402	-1.02937	0.511083	0.633998
WASL	O00401	O00401	WASL_HUMAN	Actin nucleation-promoting factor WASL	-0.0609647	-0.484188	0.200407	0.841283
IPO5	O00410	O00410	IPO5_HUMAN	Importin-5	0.179351	1.17726	0.611428	0.576573
POLRMT	O00411	O00411	RPOM_HUMAN	DNA-directed RNA polymerase, mitochondrial	0.2949	1.71438	1.03314	0.389845
EEF2K	O00418	O00418	EF2K_HUMAN	Eukaryotic elongation factor 2 kinase	-0.324475	-1.89934	1.19862	0.334941
SAP18	O00422	O00422	SAP18_HUMAN	Histone deacetylase complex subunit SAP18	0.0992085	0.808515	0.374046	0.716746
EML1	O00423	O00423	EMAL1_HUMAN	Echinoderm microtubule-associated protein-like 1	-0.5673	-2.75759	2.091	0.146799
IGF2BP3	O00425	O00425	IF2B3_HUMAN	Insulin-like growth factor 2 mRNA-binding protein 3	0.464669	0.652809	0.286619	0.776979
DNM1L	O00429	O00429	DNM1L_HUMAN	Dynamin-1-like protein	0.192667	1.29343	0.695065	0.534435
RTCA	O00442	O00442	RTCA_HUMAN	RNA 3'-terminal phosphate cyclase	0.00172796	0.0145342	0.0050402	0.993956
PIK3C2A	O00443	O00443	P3C2A_HUMAN	Phosphatidylinositol 4-phosphate 3-kinase C2 domain-containing subunit alpha	-0.197658	-2.60296	1.91606	0.172199
PIK3R2	O00459	O00459	P85B_HUMAN	Phosphatidylinositol 3-kinase regulatory subunit beta	0.403102	2.31726	1.60865	0.229667
GOLIM4	O00461	O00461	GOLI4_HUMAN	Golgi integral membrane protein 4	0.270443	1.30881	0.706458	0.52903
MANBA	O00462	O00462	MANBA_HUMAN	Beta-mannosidase	-0.0910375	-0.70005	0.312346	0.760467
AGRN	O00468	O00468	AGRIN_HUMAN	Agrin	-0.321334	-1.79571	1.10466	0.365107
PLOD2	O00469	O00469	PLOD2_HUMAN	Procollagen-lysine,2-oxoglutarate 5-dioxygenase 2	0.133557	0.443994	0.181139	0.854487
MEIS1	O00470	O00470;O14770	MEIS1_HUMAN	Homeobox protein Meis1	-0.243249	-1.27773	0.683517	0.540489
EXOC5	O00471	O00471	EXOC5_HUMAN	Exocyst complex component 5	0.102294	1.37039	0.752798	0.507758
BTN3A3	O00478	O00478	BT3A3_HUMAN	Butyrophilin subfamily 3 member A3	-0.440075	-2.19623	1.48491	0.257239
HMGN4	O00479	O00479;P05204	HMGN4_HUMAN	High mobility group nucleosome-binding domain-containing protein 4	-0.674935	-3.18289	2.60063	0.0884641
NDUFA4	O00483	O00483	NDUA4_HUMAN	Cytochrome c oxidase subunit NDUFA4	-0.626498	-2.80196	2.14226	0.139651
PSMD14	O00487	O00487	PSDE_HUMAN	26S proteasome non-ATPase regulatory subunit 14	-0.188721	-1.88123	1.18197	0.339731
ZNF593	O00488	O00488	ZN593_HUMAN	Zinc finger protein 593	0.162619	1.17612	0.610625	0.577064
BIN1	O00499	O00499	BIN1_HUMAN	Myc box-dependent-interacting protein 1	-0.389281	-3.51792	3.02864	0.0563799
KPNA3	O00505	O00505	IMA4_HUMAN	Importin subunit alpha-4	0.34525	3.03803	2.42258	0.105548
STK25	O00506	O00506	STK25_HUMAN	Serine/threonine-protein kinase 25	-0.105538	-0.758256	0.344999	0.736931
BCL9	O00512	O00512	BCL9_HUMAN	B-cell CLL/lymphoma 9 protein	-0.156619	-1.66268	0.988712	0.405659
LAD1	O00515	O00515	LAD1_HUMAN	Ladinin-1	0.176213	0.959662	0.466173	0.658826
FAAH	O00519	O00519	FAAH1_HUMAN	Fatty-acid amide hydrolase 1	-1.23549	-5.32588	5.62153	0.00242045
KRIT1	O00522	O00522	KRIT1_HUMAN	Krev interaction trapped protein 1	-0.0899828	-0.848136	0.397502	0.701086
CHL1	O00533	O00533	NCHL1_HUMAN	Neural cell adhesion molecule L1-like protein	-0.386146	-1.14724	0.590505	0.58728
VWA5A	O00534	O00534	VMA5A_HUMAN	von Willebrand factor A domain-containing protein 5A	-1.17987	-4.18914	3.9445	0.0199948
PES1	O00541	O00541	PESC_HUMAN	Pescadillo homolog	0.106594	0.884918	0.419717	0.686503
EBAG9	O00559	O00559	RCAS1_HUMAN	Receptor-binding cancer antigen expressed on SiSo cells	0.0431884	0.242897	0.0920092	0.925559
SDCBP	O00560	O00560	SDCB1_HUMAN	Syntenin-1	0.031762	0.178789	0.0660949	0.944478
PITPNM1	O00562	O00562	PITM1_HUMAN	Membrane-associated phosphatidylinositol transfer protein 1	-0.414501	-2.34502	1.63758	0.223744
MPHOSPH10	O00566	O00566	MPP10_HUMAN	U3 small nucleolar ribonucleoprotein protein MPP10	0.0228981	0.180099	0.0666124	0.944206
NOP56	O00567	O00567	NOP56_HUMAN	Nucleolar protein 56	-0.261112	-1.6551	0.98226	0.407494
DDX3X	O00571	O15523;O00571	DDX3X_HUMAN	ATP-dependent RNA helicase DDX3X	0.262396	1.84171	1.14598	0.351132
RNASET2	O00584	O00584	RNT2_HUMAN	Ribonuclease T2	-0.0365229	-0.137599	0.0500685	0.957725
PODXL	O00592	O00592	PODXL_HUMAN	Podocalyxin	-0.360592	-1.2743	0.681005	0.542123
PIR	O00625	O00625	PIR_HUMAN	Pirin	-0.230572	-1.00461	0.494953	0.641527
KPNA4	O00629	O00629	IMA3_HUMAN	Importin subunit alpha-3	0.317652	2.52973	1.83527	0.186026
TRIM38	O00635	O00635	TRI38_HUMAN	E3 ubiquitin-protein ligase TRIM38	-0.13746	-1.21178	0.635842	0.562622
NFIB	O00712	O00712	NFIB_HUMAN	Nuclear factor 1 B-type	-0.0180896	-0.152228	0.055705	0.951897
PPP6C	O00743	O00743	PPP6_HUMAN	Serine/threonine-protein phosphatase 6 catalytic subunit	-0.469291	-2.46614	1.76622	0.19879
CES2	O00748	O00748;P22303;Q5XG92	EST2_HUMAN	Cocaine esterase	-0.362928	-1.64588	0.974448	0.41056
PIK3C2B	O00750	O00750	P3C2B_HUMAN	Phosphatidylinositol 4-phosphate 3-kinase C2 domain-containing subunit beta	0.150192	0.904363	0.431634	0.679804
MAN2B1	O00754	O00754	MA2B1_HUMAN	Lysosomal alpha-mannosidase	0.393215	2.8187	2.16172	0.137029
UBE2C	O00762	O00762	UBE2C_HUMAN	Ubiquitin-conjugating enzyme E2 C	1.48674	4.60841	4.54825	0.00955294
PDXK	O00764	O00764	PDXK_HUMAN	Pyridoxal kinase	-0.564423	-3.14769	2.55696	0.0923009
ARID1A	O14497	O14497	ARI1A_HUMAN	AT-rich interactive domain-containing protein 1A	0.106712	0.997242	0.490194	0.644129
ISLR	O14498	O14498	ISLR_HUMAN	Immunoglobulin superfamily containing leucine-rich repeat protein	-0.50591	-1.40174	0.776839	0.498695
C2CD2L	O14523	O14523	C2C2L_HUMAN	Phospholipid transfer protein C2CD2L	-0.441924	-3.06701	2.45784	0.101604
NEMP1	O14524	O14524	NEMP1_HUMAN	Nuclear envelope integral membrane protein 1	-0.168593	-1.09129	0.552256	0.608326
TXNDC9	O14530	O14530	TXND9_HUMAN	Thioredoxin domain-containing protein 9	0.127349	1.14125	0.586358	0.590447
DPYSL4	O14531	O14531	DPYL4_HUMAN	Dihydropyrimidinase-related protein 4	0.342272	0.957055	0.464523	0.659616
TRAFD1	O14545	O14545	TRAD1_HUMAN	TRAF-type zinc finger domain-containing protein 1	0.0713206	1.00991	0.498391	0.639729
COX7A2L	O14548	O14548	COX7R_HUMAN	Cytochrome c oxidase subunit 7A-related protein, mitochondrial	-0.15276	-0.813475	0.376955	0.71419
HSPB6	O14558	O14558	HSPB6_HUMAN	Heat shock protein beta-6	-0.48025	-1.43485	0.802569	0.487132
NDUFAB1	O14561	O14561	ACPM_HUMAN	Acyl carrier protein, mitochondrial	-0.024901	-0.160253	0.058823	0.950002
UBFD1	O14562	O14562	UBFD1_HUMAN	Ubiquitin domain-containing protein UBFD1	0.0493398	0.377353	0.150269	0.880884
CIT	O14578	O14578	CTRO_HUMAN	Citron Rho-interacting kinase	0.400022	1.76122	1.07409	0.375572
COPE	O14579	O14579	COPE_HUMAN	Coatomer subunit epsilon	-0.112489	-1.13961	0.585231	0.591146
RFXANK	O14593	O14593	RFXK_HUMAN	DNA-binding protein RFXANK	-0.247548	-1.53981	0.88635	0.447264
AP3D1	O14617	O14617	AP3D1_HUMAN	AP-3 complex subunit delta-1	-0.380912	-6.02169	6.69347	0.000690355
CCS	O14618	O14618	CCS_HUMAN	Copper chaperone for superoxide dismutase	-0.45666	-2.65925	1.97907	0.162532
ABLIM1	O14639	O14639	ABLM1_HUMAN	Actin-binding LIM protein 1	-0.54916	-3.11465	2.51621	0.0959029
DVL1	O14640	P54792;O14640	DVL1_HUMAN	Segment polarity protein dishevelled homolog DVL-1	-0.647755	-4.42948	4.28807	0.0131098
DVL2	O14641	O14641	DVL2_HUMAN	Segment polarity protein dishevelled homolog DVL-2	-0.303781	-2.04101	1.33211	0.294569
DNALI1	O14645	O14645	IDLC_HUMAN	Axonemal dynein light intermediate polypeptide 1	-1.37944	-4.41926	4.27332	0.0132829
CHD1	O14646	O14646	CHD1_HUMAN	Chromodomain-helicase-DNA-binding protein 1	0.118241	0.491009	0.203725	0.838427
CHD2	O14647	Q8TD26;Q9HCK8;Q3L8U1;O14647;Q9P2D1;O14646	CHD2_HUMAN	Chromodomain-helicase-DNA-binding protein 2	-0.128777	-1.97385	1.26812	0.313461
GOSR2	O14653	O14653	GOSR2_HUMAN	Golgi SNAP receptor complex member 2	-0.161651	-1.15276	0.594326	0.585145
TOR1A	O14656	O14656	TOR1A_HUMAN	Torsin-1A	-0.149381	-1.15161	0.593534	0.585694
TOR1B	O14657	O14657	TOR1B_HUMAN	Torsin-1B	0.151364	0.804944	0.371955	0.717943
STX16	O14662	O14662	STX16_HUMAN	Syntaxin-16	0.160878	0.966005	0.470196	0.656319
ADAM10	O14672	O14672	ADA10_HUMAN	Disintegrin and metalloproteinase domain-containing protein 10	-0.726713	-6.32188	7.16116	0.000356688
ABCD4	O14678	O14678	ABCD4_HUMAN	Lysosomal cobalamin transporter ABCD4	-0.488625	-2.23066	1.5197	0.249972
EI24	O14681	O14681	EI24_HUMAN	Etoposide-induced protein 2.4 homolog	-0.0926685	-0.909285	0.434669	0.679086
TP53I11	O14683	O14683	P5I11_HUMAN	Tumor protein p53-inducible protein 11	0.0218969	0.0875975	0.0312619	0.971557
PTGES	O14684	O14684	PTGES_HUMAN	Prostaglandin E synthase	-0.750855	-1.81715	1.12385	0.358666
KMT2D	O14686	O14686	KMT2D_HUMAN	Histone-lysine N-methyltransferase 2D	-0.154894	-1.36408	0.747991	0.509985
APAF1	O14727	O14727	APAF_HUMAN	Apoptotic protease-activating factor 1	-0.151488	-1.443	0.808949	0.484082
IMPA2	O14732	O14732	IMPA2_HUMAN	Inositol monophosphatase 2	0.666988	2.63809	1.9553	0.166918
MAP2K7	O14733	O14733	MP2K7_HUMAN	Dual specificity mitogen-activated protein kinase kinase 7	-0.144331	-1.0845	0.547683	0.610974
ACOT8	O14734	O14734	ACOT8_HUMAN	Acyl-coenzyme A thioesterase 8	0.559517	3.69278	3.26027	0.0440523
CDIPT	O14735	O14735	CDIPT_HUMAN	CDP-diacylglycerol--inositol 3-phosphatidyltransferase	-0.150244	-1.34285	0.731924	0.517622
PDCD5	O14737	O14737	PDCD5_HUMAN	Programmed cell death protein 5	0.0834772	0.391833	0.156863	0.873791
PRMT5	O14744	O14744	ANM5_HUMAN	Protein arginine N-methyltransferase 5	-0.413182	-3.6585	3.21445	0.0463416
NHERF1	O14745	O14745	NHRF1_HUMAN	Na(+)/H(+) exchange regulatory cofactor NHE-RF1	-0.381205	-2.19784	1.48653	0.256804
CHEK1	O14757	O14757	CHK1_HUMAN	Serine/threonine-protein kinase Chk1	0.759512	3.4621	2.95584	0.0607074
FPGT	O14772	O14772	FPGT_HUMAN	Fucose-1-phosphate guanylyltransferase	-0.173885	-1.68009	1.00359	0.401382
TPP1	O14773	O14773	TPP1_HUMAN	Tripeptidyl-peptidase 1	-0.487621	-2.88904	2.24419	0.125897
TCERG1	O14776	O14776	TCRG1_HUMAN	Transcription elongation regulator 1	0.00379489	0.0444585	0.0156005	0.986545
NDC80	O14777	O14777	NDC80_HUMAN	Kinetochore protein NDC80 homolog	2.07675	4.86203	4.92268	0.00582766
NRP1	O14786	O14786	NRP1_HUMAN	Neuropilin-1	-0.836777	-4.4798	4.36088	0.0120063
TNPO2	O14787	O14787	TNPO2_HUMAN	Transportin-2	-0.0977042	-0.743175	0.336437	0.742818
APOL1	O14791	O14791	APOL1_HUMAN	Apolipoprotein L1	-0.0547636	-0.244594	0.0927113	0.925156
UNC13B	O14795	O14795	UN13B_HUMAN	Protein unc-13 homolog B	-0.254747	-1.4947	0.84993	0.463657
POLR3A	O14802	O14802	RPC1_HUMAN	DNA-directed RNA polymerase III subunit RPC1	-0.112116	-1.3174	0.712851	0.526351
PSMA7	O14818	O14818	PSA7_HUMAN	Proteasome subunit alpha type-7	-0.35732	-4.04384	3.74045	0.0252896
SCAMP3	O14828	O14828	SCAM3_HUMAN	Secretory carrier-associated membrane protein 3	0.264163	1.59054	0.928057	0.429883
PHYH	O14832	O14832	PAHX_HUMAN	Phytanoyl-CoA dioxygenase, peroxisomal	0.46515	1.51692	0.867793	0.454232
OPLAH	O14841	O14841	OPLA_HUMAN	5-oxoprolinase	0.6647	3.07944	2.47302	0.100228
BACH1	O14867	O14867	BACH1_HUMAN	Transcription regulator protein BACH1	-0.245594	-1.20921	0.634006	0.563471
BCKDK	O14874	O14874	BCKD_HUMAN	[3-methyl-2-oxobutanoate dehydrogenase [lipoamide]] kinase, mitochondrial	0.0769583	0.544805	0.230394	0.816471
IFIT3	O14879	O14879	IFIT3_HUMAN	Interferon-induced protein with tetratricopeptide repeats 3	-0.584327	-2.22064	1.50954	0.251925
MGST3	O14880	O14880	MGST3_HUMAN	Glutathione S-transferase 3, mitochondrial	-0.253709	-1.31995	0.714751	0.525731
GEMIN2	O14893	O14893	GEMI2_HUMAN	Gem-associated protein 2	0.364808	2.20315	1.49188	0.255743
IRF6	O14896	O14896	IRF6_HUMAN	Interferon regulatory factor 6	-0.488844	-3.43638	2.92249	0.0629984
TAX1BP3	O14907	O14907	TX1B3_HUMAN	Tax1-binding protein 3	-0.209406	-1.13195	0.579955	0.593729
GIPC1	O14908	Q8TF64;O14908	GIPC1_HUMAN	PDZ domain-containing protein GIPC1	0.297873	1.9985	1.29146	0.30674
IKBKB	O14920	O14920	IKKB_HUMAN	Inhibitor of nuclear factor kappa-B kinase subunit beta	-0.141558	-1.22024	0.641879	0.55972
RGS12	O14924	O14924	RGS12_HUMAN	Regulator of G-protein signaling 12	-0.597028	-3.42229	2.90428	0.0642908
TIMM23	O14925	O14925;Q5SRD1	TIM23_HUMAN	Mitochondrial import inner membrane translocase subunit Tim23	0.578006	3.61519	3.15683	0.0496699
HAT1	O14929	O14929	HAT1_HUMAN	Histone acetyltransferase type B catalytic subunit	0.99737	4.34722	4.16968	0.0149528
UBE2L6	O14933	O14933	UB2L6_HUMAN	Ubiquitin/ISG15-conjugating enzyme E2 L6	0.0339115	0.195891	0.072892	0.939534
CASK	O14936	O14936	CSKP_HUMAN	Peripheral plasma membrane protein CASK	-0.595471	-5.79765	6.34606	0.000831373
PLD2	O14939	O14939	PLD2_HUMAN	Phospholipase D2	-0.406855	-3.02319	2.40459	0.107356
UQCRQ	O14949	O14949	QCR8_HUMAN	Cytochrome b-c1 complex subunit 8	-0.244919	-1.30613	0.704464	0.529877
MYL12A;MYL12B	O14950;P19105	P19105;O14950	ML12A_HUMAN;ML12B_HUMAN	Myosin regulatory light chain 12B	-0.299674	-2.50723	1.81072	0.189531
HGS	O14964	O14964	HGS_HUMAN	Hepatocyte growth factor-regulated tyrosine kinase substrate	-0.155728	-1.81386	1.12089	0.359811
AURKA	O14965	O14965	AURKA_HUMAN	Aurora kinase A	0.165476	0.712296	0.319128	0.756251
RAB29	O14966	O14966	RAB7L_HUMAN	Ras-related protein Rab-7L1	-0.315309	-1.97091	1.26534	0.314026
CLGN	O14967	O14967	CLGN_HUMAN	Calmegin	-0.417967	-1.41097	0.783979	0.494722
VPS26C	O14972	O14972	VP26C_HUMAN	Vacuolar protein sorting-associated protein 26C	-0.222057	-2.25359	1.54306	0.244225
PPP1R12A	O14974	O14974	MYPT1_HUMAN	Protein phosphatase 1 regulatory subunit 12A	-0.00907044	-0.0770095	0.0273699	0.9741
SLC27A2	O14975	O14975	S27A2_HUMAN	Long-chain fatty acid transport protein 2	-1.30876	-4.63996	4.59449	0.0090519
GAK	O14976	O14976	GAK_HUMAN	Cyclin-G-associated kinase	-0.14687	-1.00256	0.493631	0.642425
HNRNPDL	O14979	O14979	HNRDL_HUMAN	Heterogeneous nuclear ribonucleoprotein D-like	-0.300621	-1.79372	1.10289	0.365701
XPO1	O14980	O14980	XPO1_HUMAN	Exportin-1	0.139458	1.33593	0.726715	0.519527
BTAF1	O14981	O14981	BTAF1_HUMAN	TATA-binding protein-associated factor 172	0.083966	0.96107	0.467065	0.658237
ZNF609	O15014	O15014	ZN609_HUMAN	Zinc finger protein 609	-0.121108	-0.569435	0.2429	0.806919
SPTBN2	O15020	O15020	SPTN2_HUMAN	Spectrin beta chain, non-erythrocytic 2	-0.0679204	-0.523777	0.219864	0.824952
MAST4	O15021	O15021	MAST4_HUMAN	Microtubule-associated serine/threonine-protein kinase 4	-0.837201	-5.42945	5.7796	0.002
SEC16A	O15027	O15027	SC16A_HUMAN	Protein transport protein Sec16A	-0.229126	-2.15805	1.4467	0.265646
PLXNB2	O15031	O15031	PLXB2_HUMAN	Plexin-B2	-0.460203	-4.99364	5.11929	0.00472973
AREL1	O15033	O15033	AREL1_HUMAN	Apoptosis-resistant E3 ubiquitin protein ligase 1	0.0972227	0.802719	0.370655	0.718879
KHNYN	O15037	O15037	KHNYN_HUMAN	Protein KHNYN	-0.0955711	-0.889147	0.422299	0.685095
TECPR2	O15040	O15040	TCPR2_HUMAN	Tectonin beta-propeller repeat-containing protein 2	-0.123597	-2.15629	1.44495	0.266099
U2SURP	O15042	O15042	SR140_HUMAN	U2 snRNP-associated SURP motif-containing protein	0.0604678	0.53105	0.223491	0.821786
SETD1A	O15047	O15047	SET1A_HUMAN	Histone-lysine N-methyltransferase SETD1A	-0.270698	-1.97487	1.26907	0.313329
N4BP3	O15049	O15049	N4BP3_HUMAN	NEDD4-binding protein 3	-0.0489771	-0.195109	0.0725792	0.939706
TRANK1	O15050	O15050	TRNK1_HUMAN	TPR and ankyrin repeat-containing protein 1	-0.799021	-3.48884	2.99065	0.0585502
SYNJ2	O15056	O15056	SYNJ2_HUMAN	Synaptojanin-2	-0.396112	-3.56016	3.08411	0.0531351
SYNM	O15061	O15061	SYNEM_HUMAN	Synemin	-0.86257	-2.68306	2.00596	0.158521
KIF3B	O15066	O15066	KIF3B_HUMAN	Kinesin-like protein KIF3B	-0.238504	-1.41704	0.788683	0.492693
PFAS	O15067	O15067	PUR4_HUMAN	Phosphoribosylformylglycinamidine synthase	-0.591586	-3.83716	3.45543	0.0349899
MCF2L	O15068	O15068	MCF2L_HUMAN	Guanine nucleotide exchange factor DBS	-0.497949	-2.21123	1.50003	0.253788
DCLK1	O15075	O15075	DCLK1_HUMAN	Serine/threonine-protein kinase DCLK1	0.44572	1.18238	0.615025	0.573665
CEP290	O15078	O15078	CE290_HUMAN	Centrosomal protein of 290 kDa	-0.650832	-2.90288	2.26055	0.123739
ANKRD28	O15084	Q8N8A2;O15084	ANR28_HUMAN	Serine/threonine-protein phosphatase 6 regulatory ankyrin repeat subunit A	-0.0777801	-0.636798	0.278057	0.782754
ARHGEF11	O15085	O15085	ARHGB_HUMAN	Rho guanine nucleotide exchange factor 11	0.0160869	0.128473	0.0465833	0.959965
PRORP	O15091	O15091	MRPP3_HUMAN	Mitochondrial ribonuclease P catalytic subunit	0.323773	1.89144	1.19135	0.337006
CHUK	O15111	O15111	IKKA_HUMAN	Inhibitor of nuclear factor kappa-B kinase subunit alpha	0.0411898	0.239075	0.0904306	0.926516
LSM1	O15116	O15116	LSM1_HUMAN	U6 snRNA-associated Sm-like protein LSm1	-0.0294411	-0.201495	0.0751375	0.938514
NPC1	O15118	O15118	NPC1_HUMAN	NPC intracellular cholesterol transporter 1	0.471225	4.26501	4.05218	0.0173369
AGPAT2	O15120	O15120	PLCB_HUMAN	1-acyl-sn-glycerol-3-phosphate acyltransferase beta	-0.341882	-1.09656	0.555821	0.606711
DEGS1	O15121	O15121	DEGS1_HUMAN	Sphingolipid delta(4)-desaturase DES1	-0.13021	-0.94255	0.455382	0.663769
SCAMP1	O15126	O15126	SCAM1_HUMAN	Secretory carrier-associated membrane protein 1	-0.342315	-2.79647	2.1359	0.140615
SCAMP2	O15127	O15127	SCAM2_HUMAN	Secretory carrier-associated membrane protein 2	-0.170818	-1.10564	0.561975	0.603576
ARPC1B	O15143	O15143	ARC1B_HUMAN	Actin-related protein 2/3 complex subunit 1B	0.161174	1.46197	0.823893	0.477172
ARPC2	O15144	O15144	ARPC2_HUMAN	Actin-related protein 2/3 complex subunit 2	-0.0631643	-0.681804	0.302327	0.766736
ARPC3	O15145	O15145	ARPC3_HUMAN	Actin-related protein 2/3 complex subunit 3	-0.124167	-1.27962	0.684902	0.539659
BET1	O15155	O15155	BET1_HUMAN	BET1 homolog	0.0583101	0.467572	0.192382	0.847001
POLR1C	O15160	O15160	RPAC1_HUMAN	DNA-directed RNA polymerases I and III subunit RPAC1	0.00174876	0.0204256	0.00709974	0.992043
TRIM24	O15164	O15164	TIF1A_HUMAN	Transcription intermediary factor 1-alpha	0.119914	0.888579	0.421952	0.68535
PGRMC2	O15173	O15173	PGRC2_HUMAN	Membrane-associated progesterone receptor component 2	-0.559987	-4.91998	5.00907	0.00536421
CETN3	O15182	O15182	CETN3_HUMAN	Centrin-3	-1.01126	-6.60618	7.60552	0.000126984
VILL	O15195	O15195	VILL_HUMAN	Villin-like protein	-0.291781	-1.0599	0.531231	0.6207
EPHB6	O15197	O15197	EPHB6_HUMAN	Ephrin type-B receptor 6	0.037437	0.179124	0.0662273	0.944377
RGL2	O15211	O15211	RGL2_HUMAN	Ral guanine nucleotide dissociation stimulator-like 2	-0.122466	-0.62522	0.271914	0.787686
PFDN6	O15212	O15212	PFD6_HUMAN	Prefoldin subunit 6	0.0173746	0.132293	0.0480394	0.959089
WDR46	O15213	O15213	WDR46_HUMAN	WD repeat-containing protein 46	0.0244583	0.238769	0.0903048	0.926472
NKRF	O15226	O15226	NKRF_HUMAN	NF-kappa-B-repressing factor	0.322277	3.42421	2.90676	0.0641766
GNPAT	O15228	O15228	GNPAT_HUMAN	Dihydroxyacetone phosphate acyltransferase	0.135981	1.16878	0.605487	0.580031
LAMA5	O15230	O15230	LAMA5_HUMAN	Laminin subunit alpha-5	-0.438219	-1.9406	1.23691	0.32211
ZNF185	O15231	O15231	ZN185_HUMAN	Zinc finger protein 185	-0.447465	-3.08075	2.47462	0.100161
CASC3	O15234	O15234	CASC3_HUMAN	Protein CASC3	0.126987	1.35469	0.740871	0.513937
MRPS12	O15235	O15235	RT12_HUMAN	Small ribosomal subunit protein uS12m	0.17274	1.34821	0.735972	0.516565
NDUFA1	O15239	O15239	NDUA1_HUMAN	NADH dehydrogenase [ubiquinone] 1 alpha subcomplex subunit 1	-0.132758	-1.08541	0.5483	0.610579
CLIC2	O15247	O15247	CLIC2_HUMAN	Chloride intracellular channel protein 2	0.0684032	0.260439	0.0993079	0.919881
ACOX3	O15254	O15254	ACOX3_HUMAN	Peroxisomal acyl-coenzyme A oxidase 3	-0.407967	-2.33774	1.62998	0.225128
RER1	O15258	O15258	RER1_HUMAN	Protein RER1	0.340741	2.12467	1.41364	0.273926
NPHP1	O15259	O15259	NPHP1_HUMAN	Nephrocystin-1	-1.39455	-5.92721	6.54676	0.000785047
SURF4	O15260	O15260	SURF4_HUMAN	Surfeit locus protein 4	0.00250867	0.0183719	0.00638072	0.992716
MAPK13	O15264	O15264	MK13_HUMAN	Mitogen-activated protein kinase 13	0.0102942	0.0503365	0.017704	0.984689
SPTLC1	O15269	O15269	SPTC1_HUMAN	Serine palmitoyltransferase 1	-0.0742845	-0.69781	0.31111	0.760932
SPTLC2	O15270	O15270	SPTC2_HUMAN	Serine palmitoyltransferase 2	0.120822	1.38996	0.76777	0.502778
OGT	O15294	O15294	OGT1_HUMAN	UDP-N-acetylglucosamine--peptide N-acetylglucosaminyltransferase 110 kDa subunit	-0.0395381	-0.579062	0.247839	0.804025
PMM2	O15305	O15305	PMM2_HUMAN	Phosphomannomutase 2	0.144643	1.04117	0.518835	0.628523
TM9SF1	O15321	O15321	TM9S1_HUMAN	Transmembrane 9 superfamily member 1	-0.361403	-2.14516	1.43389	0.268626
MID1	O15344	O15344	TRI18_HUMAN	E3 ubiquitin-protein ligase Midline-1	-0.148152	-0.651546	0.285941	0.77739
HMGB3	O15347	O15347	HMGB3_HUMAN	High mobility group protein B3	0.394662	1.82491	1.13082	0.35624
PPM1G	O15355	O15355	PPM1G_HUMAN	Protein phosphatase 1G	0.368407	2.24429	1.53357	0.246726
INPPL1	O15357	O15357	SHIP2_HUMAN	Phosphatidylinositol 3,4,5-trisphosphate 5-phosphatase 2	0.023156	0.294016	0.11353	0.909784
EIF3D	O15371	O15371	EIF3D_HUMAN	Eukaryotic translation initiation factor 3 subunit D	-0.107678	-0.978525	0.478175	0.651072
EIF3H	O15372	O15372	EIF3H_HUMAN	Eukaryotic translation initiation factor 3 subunit H	-0.0824292	-1.05479	0.527844	0.622099
HDAC3	O15379	O15379	HDAC3_HUMAN	Histone deacetylase 3	-0.17129	-2.04442	1.3354	0.294414
NVL	O15381	O15381	NVL_HUMAN	Nuclear valosin-containing protein-like	0.310148	2.71187	2.03868	0.154324
BCAT2	O15382	O15382	BCAT2_HUMAN	Branched-chain-amino-acid aminotransferase, mitochondrial	-0.230745	-1.44993	0.814397	0.480947
YY2	O15391	O15391	TYY2_HUMAN	Transcription factor YY2	-0.619177	-1.87879	1.17974	0.340172
IPO8	O15397	O15397	IPO8_HUMAN	Importin-8	0.122868	0.806229	0.372707	0.717408
STX7	O15400	O15400	STX7_HUMAN	Syntaxin-7	-0.215889	-1.40948	0.782826	0.495449
TNRC18	O15417	O15417	TNC18_HUMAN	Trinucleotide repeat-containing gene 18 protein	-0.331397	-1.78609	1.0961	0.36813
SLC16A3	O15427	O15427	MOT4_HUMAN	Monocarboxylate transporter 4	0.0389767	0.167507	0.061657	0.948761
ABCC4	O15439	O15439	MRP4_HUMAN	ATP-binding cassette sub-family C member 4	-0.0186183	-0.0937029	0.0335205	0.969555
POLR1G	O15446	O15446	RPA34_HUMAN	DNA-directed RNA polymerase I subunit RPA34	-0.0570251	-0.363039	0.143811	0.88586
TLR3	O15455	O15455	TLR3_HUMAN	Toll-like receptor 3	-1.15608	-4.36554	4.19597	0.0144986
P4HA2	O15460	O15460	P4HA2_HUMAN	Prolyl 4-hydroxylase subunit alpha-2	0.489191	2.60659	1.9201	0.171648
CAPN5	O15484	O15484	CAN5_HUMAN	Calpain-5	-0.247828	-1.13748	0.583758	0.591723
GYG2	O15488	O15488	GLYG2_HUMAN	Glycogenin-2	-0.663633	-3.41509	2.89497	0.0647245
YKT6	O15498	O15498	YKT6_HUMAN	Synaptobrevin homolog YKT6	0.353079	3.41026	2.88875	0.0651407
NUP42	O15504	O15504	NUP42_HUMAN	Nucleoporin NUP42	-0.111784	-0.779501	0.35718	0.728836
ARPC5	O15511	O15511	ARPC5_HUMAN	Actin-related protein 2/3 complex subunit 5	0.0599349	0.539001	0.227474	0.818752
POLR2D	O15514	O15514	RPB4_HUMAN	DNA-directed RNA polymerase II subunit RPB4	-0.0122021	-0.166719	0.0613483	0.948652
PDPK1	O15530	O15530	PDPK1_HUMAN	3-phosphoinositide-dependent protein kinase 1	-0.340487	-3.86553	3.49417	0.033817
TAPBP	O15533	O15533	TPSN_HUMAN	Tapasin	0.265845	0.922317	0.442742	0.673036
KDM6A	O15550	O14607;O15550	KDM6A_HUMAN	Lysine-specific demethylase 6A	-0.1536	-1.25517	0.667052	0.546604
CLDN3	O15551	P56747;O14493;O15551;O95484	CLD3_HUMAN	Claudin-3	0.599299	3.89474	3.53418	0.0322503
DHX15	O43143	O43143	DHX15_HUMAN	ATP-dependent RNA helicase DHX15	-0.025082	-0.20999	0.0785586	0.934984
RNMT	O43148	O43148	MCES_HUMAN	mRNA cap guanine-N7 methyltransferase	0.273653	2.02683	1.3185	0.298672
ZZEF1	O43149	O43149	ZZEF1_HUMAN	Zinc finger ZZ-type and EF-hand domain-containing protein 1	-0.265964	-2.72563	2.05437	0.152079
ASAP2	O43150	O43150	ASAP2_HUMAN	Arf-GAP with SH3 domain, ANK repeat and PH domain-containing protein 2	-0.293642	-1.65053	0.978388	0.408888
TTI1	O43156	O43156	TTI1_HUMAN	TELO2-interacting protein 1 homolog	0.155585	0.928604	0.446656	0.669995
PLXNB1	O43157	O43157	PLXB1_HUMAN	Plexin-B1	-0.184961	-1.45745	0.820324	0.478986
RRP8	O43159	O43159	RRP8_HUMAN	Ribosomal RNA-processing protein 8	-0.199313	-1.83673	1.14147	0.352834
PJA2	O43164	O43164	PJA2_HUMAN	E3 ubiquitin-protein ligase Praja-2	-0.498249	-2.8166	2.15927	0.137456
SIPA1L1	O43166	O43166	SI1L1_HUMAN	Signal-induced proliferation-associated 1-like protein 1	-0.0393105	-0.527201	0.22157	0.823346
CYB5B	O43169	O43169	CYB5B_HUMAN	Cytochrome b5 type B	-0.301403	-1.66931	0.994368	0.404329
PRPF4	O43172	O43172	PRP4_HUMAN	U4/U6 small nuclear ribonucleoprotein Prp4	0.109597	0.924106	0.443855	0.672081
PHGDH	O43175	O43175	SERA_HUMAN	D-3-phosphoglycerate dehydrogenase	-0.83304	-2.8788	2.23211	0.12788
NDUFS4	O43181	O43181	NDUS4_HUMAN	NADH dehydrogenase [ubiquinone] iron-sulfur protein 4, mitochondrial	-0.594372	-3.67547	3.23711	0.0451771
ARHGAP6	O43182	O43182	RHG06_HUMAN	Rho GTPase-activating protein 6	-1.59114	-4.79381	4.82137	0.00665896
PHF1	O43189	O43189	PHF1_HUMAN	PHD finger protein 1	-0.686324	-3.5267	3.04013	0.0557542
GPR39	O43194	O43194	GPR39_HUMAN	G-protein coupled receptor 39	-0.675933	-2.87704	2.23004	0.128109
DYNC1LI2	O43237	O43237	DC1L2_HUMAN	Cytoplasmic dynein 1 light intermediate chain 2	-0.332796	-2.42524	1.72235	0.207734
PSMD3	O43242	O43242	PSMD3_HUMAN	26S proteasome non-ATPase regulatory subunit 3	-0.239003	-2.31309	1.60432	0.230734
RBFOX2	O43251	O43251	RFOX2_HUMAN	RNA binding protein fox-1 homolog 2	-0.0642619	-0.6111	0.26448	0.793406
PAPSS1	O43252	O43252	PAPS1_HUMAN	Bifunctional 3'-phosphoadenosine 5'-phosphosulfate synthase 1	0.194471	1.20989	0.63449	0.563145
ZW10	O43264	O43264	ZW10_HUMAN	Centromere/kinetochore protein zw10 homolog	0.07211	0.969192	0.472222	0.654929
SPINT1	O43278	O43278	SPIT1_HUMAN	Kunitz-type protease inhibitor 1	0.440699	2.83676	2.18278	0.134003
B4GALT5	O43286	O43286	B4GT5_HUMAN	Beta-1,4-galactosyltransferase 5	0.0744065	0.342896	0.134829	0.89375
SART1	O43290	O43290	SNUT1_HUMAN	U4/U6.U5 tri-snRNP-associated protein 1	0.0408609	0.468642	0.192897	0.846509
SPINT2	O43291	O43291	SPIT2_HUMAN	Kunitz-type protease inhibitor 2	1.12128	3.79859	3.40296	0.0373678
GPAA1	O43292	O43292	GPAA1_HUMAN	Glycosylphosphatidylinositol anchor attachment 1 protein	0.186568	1.33038	0.722555	0.522112
DAPK3	O43293	O43293	DAPK3_HUMAN	Death-associated protein kinase 3	0.361088	1.97235	1.2667	0.31375
TGFB1I1	O43294	O43294	TGFI1_HUMAN	Transforming growth factor beta-1-induced transcript 1 protein	-0.237753	-0.684483	0.303791	0.765827
SRGAP3	O43295	O43295	SRGP3_HUMAN	SLIT-ROBO Rho GTPase-activating protein 3	-0.55612	-5.76376	6.29367	0.00090566
AP5Z1	O43299	O43299	AP5Z1_HUMAN	AP-5 complex subunit zeta-1	-0.205956	-1.51882	0.869323	0.45381
HSPA12A	O43301	O43301	HS12A_HUMAN	Heat shock 70 kDa protein 12A	-0.703601	-1.95262	1.24815	0.318578
CCP110	O43303	O43303	CP110_HUMAN	Centriolar coiled-coil protein of 110 kDa	-0.53101	-3.03287	2.41632	0.106192
PPIP5K2	O43314	Q6PFW1;O43314	VIP2_HUMAN	Inositol hexakisphosphate and diphosphoinositol-pentakisphosphate kinase 2	-0.0581667	-0.698714	0.311608	0.760909
MAP3K7	O43318	O43318	M3K7_HUMAN	Mitogen-activated protein kinase kinase kinase 7	-0.219322	-1.95972	1.25481	0.317081
EEF1E1	O43324	O43324	MCA3_HUMAN	Eukaryotic translation elongation factor 1 epsilon-1	0.024387	0.184907	0.0685166	0.942337
MSI1	O43347	O43347	MSI1H_HUMAN	RNA-binding protein Musashi homolog 1	0.882477	2.14065	1.42943	0.269621
RIPK2	O43353	O43353	RIPK2_HUMAN	Receptor-interacting serine/threonine-protein kinase 2	-0.0378389	-0.140738	0.0512731	0.956242
HNRNPR	O43390	O43390	HNRPR_HUMAN	Heterogeneous nuclear ribonucleoprotein R	-0.0864578	-0.691476	0.307625	0.763335
PRPF3	O43395	O43395	PRPF3_HUMAN	U4/U6 small nuclear ribonucleoprotein Prp3	0.0726374	0.723366	0.325299	0.752022
TXNL1	O43396	O43396	TXNL1_HUMAN	Thioredoxin-like protein 1	-0.321053	-3.01816	2.3985	0.107709
TPD52L2	O43399	O43399	TPD54_HUMAN	Tumor protein D54	0.206849	1.23357	0.651442	0.55486
EMC8	O43402	O43402	EMC8_HUMAN	ER membrane protein complex subunit 8	0.011268	0.18383	0.0680896	0.942701
ERI3	O43414	O43414	ERI3_HUMAN	ERI1 exoribonuclease 3	-0.252749	-2.66451	1.98501	0.161832
THAP12	O43422	O43422	P52K_HUMAN	52 kDa repressor of the inhibitor of the protein kinase	-0.128284	-1.01483	0.501592	0.637941
FIBP	O43427	O43427	FIBP_HUMAN	Acidic fibroblast growth factor intracellular-binding protein	-0.267127	-2.96528	2.33486	0.114843
EIF4G3	O43432	O43432	IF4G3_HUMAN	Eukaryotic translation initiation factor 4 gamma 3	0.0135301	0.135657	0.0493249	0.958137
PPIH	O43447	O43447	PPIH_HUMAN	Peptidyl-prolyl cis-trans isomerase H	-0.0417159	-0.323494	0.12629	0.899784
HTRA2	O43464	O43464;P83110	HTRA2_HUMAN	Serine protease HTRA2, mitochondrial	0.139742	1.00205	0.493301	0.642397
AKR7A2	O43488	O43488	ARK72_HUMAN	Aflatoxin B1 aldehyde reductase member 2	-0.774449	-5.03774	5.18549	0.00441958
EPB41L2	O43491	O43491	E41L2_HUMAN	Band 4.1-like protein 2	-0.192928	-0.901123	0.42964	0.680609
TGOLN2	O43493	O43493	TGON2_HUMAN	Trans-Golgi network integral membrane protein 2	-0.0958664	-0.695477	0.309825	0.762332
LAMTOR5	O43504	O43504	LTOR5_HUMAN	Ragulator complex protein LAMTOR5	-0.080891	-0.634442	0.276803	0.783986
B4GAT1	O43505	O43505	B4GA1_HUMAN	Beta-1,4-glucuronyltransferase 1	-0.328901	-2.6517	1.97058	0.164035
WIPF1	O43516	O43516	WIPF1_HUMAN	WAS/WASL-interacting protein family member 1	-0.347462	-1.52104	0.871123	0.453587
ATP8B1	O43520	O43520	AT8B1_HUMAN	Phospholipid-transporting ATPase IC	-1.02539	-5.18226	5.40347	0.00344792
BCL2L11	O43521	O43521	B2L11_HUMAN	Bcl-2-like protein 11	0.649805	3.0959	2.49317	0.0982326
FOXO3	O43524	O43524	FOXO3_HUMAN	Forkhead box protein O3	-0.0637007	-0.418821	0.169321	0.865331
CHST10	O43529	O43529	CHSTA_HUMAN	Carbohydrate sulfotransferase 10	-0.070144	-0.587593	0.252239	0.801275
RGS14	O43566	O43566	RGS14_HUMAN	Regulator of G-protein signaling 14	-1.10996	-6.12833	6.85937	0.000618785
AKAP10	O43572	O43572	AKA10_HUMAN	A-kinase anchor protein 10, mitochondrial	-0.364391	-2.41275	1.70905	0.210333
DENR	O43583	O43583	DENR_HUMAN	Density-regulated protein	-0.109462	-1.04297	0.520021	0.627509
XPOT	O43592	O43592	XPOT_HUMAN	Exportin-T	0.129706	1.08989	0.551317	0.608761
DNPH1	O43598	O43598	DNPH1_HUMAN	2'-deoxynucleoside 5'-phosphate N-hydrolase 1	-0.44455	-2.07863	1.36853	0.285258
SPRY1	O43609	O43609	SPY1_HUMAN	Protein sprouty homolog 1	-0.355095	-2.27733	1.56739	0.239407
TIMM44	O43615	O43615	TIM44_HUMAN	Mitochondrial import inner membrane translocase subunit TIM44	0.596793	3.41918	2.90026	0.0645586
TRAPPC3	O43617	O43617	TPPC3_HUMAN	Trafficking protein particle complex subunit 3	-0.0305868	-0.27218	0.104244	0.91712
CHMP2A	O43633	O43633	CHM2A_HUMAN	Charged multivesicular body protein 2a	-0.445233	-3.96727	3.63411	0.0287848
NCK2	O43639	O43639	NCK2_HUMAN	Cytoplasmic protein NCK2	-0.0312133	-0.325528	0.12718	0.899164
PLRG1	O43660	O43660	PLRG1_HUMAN	Pleiotropic regulator 1	-0.0735373	-0.840564	0.392981	0.703931
PRC1	O43663	O43663	PRC1_HUMAN	Protein regulator of cytokinesis 1	1.51833	4.77746	4.79714	0.00688337
RGS10	O43665	O43665	RGS10_HUMAN	Regulator of G-protein signaling 10	0.115991	0.609426	0.263602	0.794122
ZNF207	O43670	O43670	ZN207_HUMAN	BUB3-interacting and GLEBS motif-containing protein ZNF207	-0.158072	-1.37236	0.7543	0.507243
NDUFB5	O43674	O43674	NDUB5_HUMAN	NADH dehydrogenase [ubiquinone] 1 beta subcomplex subunit 5, mitochondrial	-0.365347	-3.02106	2.40201	0.107409
NDUFB3	O43676	O43676	NDUB3_HUMAN	NADH dehydrogenase [ubiquinone] 1 beta subcomplex subunit 3	-0.309416	-2.58292	1.89382	0.17574
NDUFA2	O43678	O43678	NDUA2_HUMAN	NADH dehydrogenase [ubiquinone] 1 alpha subcomplex subunit 2	-0.248934	-1.75949	1.07257	0.376008
GET3	O43681	O43681	GET3_HUMAN	ATPase GET3	0.0789347	0.598989	0.258152	0.797222
BUB3	O43684	O43684	BUB3_HUMAN	Mitotic checkpoint protein BUB3	-0.146855	-1.25516	0.667045	0.546491
PLPP2	O43688	O43688	PLPP2_HUMAN	Phospholipid phosphatase 2	-0.340103	-1.12355	0.57419	0.596815
ACTN4	O43707	O43707	ACTN4_HUMAN	Alpha-actinin-4	0.122731	0.756241	0.343851	0.737232
GSTZ1	O43708	O43708	MAAI_HUMAN	Maleylacetoacetate isomerase	-0.444613	-2.59835	1.91094	0.173088
BUD23	O43709	O43709	BUD23_HUMAN	Probable 18S rRNA (guanine-N(7))-methyltransferase	0.0423486	0.400799	0.160977	0.869738
GATC	O43716	O43716	GATC_HUMAN	Glutamyl-tRNA(Gln) amidotransferase subunit C, mitochondrial	0.379151	2.32263	1.61423	0.228583
HTATSF1	O43719	O43719	HTSF1_HUMAN	HIV Tat-specific factor 1	-0.299049	-3.22945	2.65879	0.0834779
KDELR3	O43731	O43731	ERD23_HUMAN	ER lumen protein-retaining receptor 3	0.233542	1.79052	1.10004	0.36676
TRAF3IP2	O43734	O43734	CIKS_HUMAN	E3 ubiquitin ligase TRAF3IP2	0.0303241	0.18631	0.0690737	0.942163
PRKAB2	O43741	O43741	AAKB2_HUMAN	5'-AMP-activated protein kinase subunit beta-2	-0.803589	-4.22888	4.0008	0.0185957
AP1G1	O43747	O43747	AP1G1_HUMAN	AP-1 complex subunit gamma-1	-0.244042	-2.3707	1.66453	0.218041
STX6	O43752	O43752	STX6_HUMAN	Syntaxin-6	0.355415	2.35598	1.64906	0.22129
SYNGR1	O43759	O43759	SNG1_HUMAN	Synaptogyrin-1	-0.735004	-2.83917	2.18561	0.133686
SYNGR2	O43760	O43760	SNG2_HUMAN	Synaptogyrin-2	-0.128628	-0.635779	0.277514	0.783259
SGTA	O43765	O43765	SGTA_HUMAN	Small glutamine-rich tetratricopeptide repeat-containing protein alpha	-0.283986	-2.13818	1.42697	0.270288
ENSA	O43768	O43768;P56211	ENSA_HUMAN	Alpha-endosulfine	-0.166008	-1.31217	0.708951	0.527956
SLC25A20	O43772	O43772	MCAT_HUMAN	Mitochondrial carnitine/acylcarnitine carrier protein	-0.23611	-1.19306	0.622555	0.570021
NARS1	O43776	O43776	SYNC_HUMAN	Asparagine--tRNA ligase, cytoplasmic	-0.266273	-1.86988	1.17159	0.342997
MYO1B	O43795	O43795	MYO1B_HUMAN	Unconventional myosin-Ib	0.454767	1.84622	1.15007	0.350215
SSNA1	O43805	O43805	SSNA1_HUMAN	Microtubule nucleation factor SSNA1	-0.795159	-3.01142	2.39035	0.108628
SLC25A17	O43808	O43808	PM34_HUMAN	Peroxisomal membrane protein PMP34	-0.400864	-1.85186	1.15518	0.348345
NUDT21	O43809	O43809	CPSF5_HUMAN	Cleavage and polyadenylation specificity factor subunit 5	-0.0595612	-0.498632	0.207451	0.83473
LANCL1	O43813	O43813	LANC1_HUMAN	Glutathione S-transferase LANCL1	-0.421621	-2.99513	2.3707	0.110724
STRN	O43815	O43815	STRN_HUMAN	Striatin	-0.0183957	-0.228177	0.0859537	0.929692
RRP9	O43818	O43818	U3IP2_HUMAN	U3 small nucleolar RNA-interacting protein 2	0.021109	0.164158	0.0603466	0.948892
SCO2	O43819	O43819	SCO2_HUMAN	Protein SCO2 homolog, mitochondrial	-0.262836	-0.834856	0.389585	0.70579
CFAP410	O43822	O43822	CF410_HUMAN	Cilia- and flagella-associated protein 410	-0.757413	-5.51743	5.91434	0.00163057
AKAP8	O43823	O43823	AKAP8_HUMAN	A-kinase anchor protein 8	0.140944	1.30372	0.702674	0.530754
GTPBP6	O43824	O43824	GTPB6_HUMAN	Putative GTP-binding protein 6	-0.0895882	-0.644963	0.282413	0.780026
SLC37A4	O43826	O43826	G6PT1_HUMAN	Glucose-6-phosphate exchanger SLC37A4	-0.517815	-3.24185	2.67436	0.0818073
IDH3B	O43837	O43837	IDH3B_HUMAN	Isocitrate dehydrogenase [NAD] subunit beta, mitochondrial	-0.101452	-0.630574	0.27475	0.785714
NRDC	O43847	O43847	NRDC_HUMAN	Nardilysin	0.37859	3.57215	3.09991	0.0522811
CALU	O43852	O43852	CALU_HUMAN	Calumenin	0.480713	2.99967	2.37618	0.1102
ATP9B	O43861	O43861	ATP9B_HUMAN	Probable phospholipid-transporting ATPase IIB	-0.446837	-1.64365	0.97256	0.411139
AHCYL1	O43865	O43865	SAHH2_HUMAN	S-adenosylhomocysteine hydrolase-like protein 1	-0.411789	-3.92906	3.58137	0.0304442
KIF1C	O43896	O43896	KIF1C_HUMAN	Kinesin-like protein KIF1C	0.0826925	0.489953	0.203211	0.838666
ORC5	O43913	O43913	ORC5_HUMAN	Origin recognition complex subunit 5	0.192611	2.35106	1.64391	0.222597
TYROBP	O43914	O43914	TYOBP_HUMAN	TYRO protein tyrosine kinase-binding protein	-0.235731	-1.40081	0.776124	0.498865
NDUFS5	O43920	O43920	NDUS5_HUMAN	NADH dehydrogenase [ubiquinone] iron-sulfur protein 5	-0.397297	-3.4916	2.99424	0.0584416
PDE6D	O43924	O43924	PDE6D_HUMAN	Retinal rod rhodopsin-sensitive cGMP 3',5'-cyclic phosphodiesterase subunit delta	-0.38219	-2.97045	2.34105	0.114301
PEX1	O43933	O43933	PEX1_HUMAN	Peroxisomal ATPase PEX1	0.127919	1.21487	0.63804	0.561684
RAD21	O60216	O60216	RAD21_HUMAN	Double-strand-break repair protein rad21 homolog	-0.198173	-2.14601	1.43474	0.268567
TIMM8A	O60220	O60220	TIM8A_HUMAN	Mitochondrial import inner membrane translocase subunit Tim8 A	0.0114921	0.0717295	0.0254407	0.976509
KALRN	O60229	O60229	KALRN_HUMAN	Kalirin	-0.0541823	-0.267694	0.102353	0.918485
DHX16	O60231	O60231	DHX16_HUMAN	Pre-mRNA-splicing factor ATP-dependent RNA helicase DHX16	0.202195	1.92391	1.22136	0.326894
ZNRD2	O60232	O60232	ZNRD2_HUMAN	Protein ZNRD2	0.185567	1.01096	0.499077	0.639319
GMFG	O60234	O60234	GMFG_HUMAN	Glia maturation factor gamma	-0.302392	-1.5477	0.892782	0.444551
HS6ST1	O60243	O60243	H6ST1_HUMAN	Heparan-sulfate 6-O-sulfotransferase 1	-0.239695	-1.41539	0.787405	0.493085
MED14	O60244	O60244	MED14_HUMAN	Mediator of RNA polymerase II transcription subunit 14	-0.0171916	-0.127832	0.0463394	0.959749
PCDH7	O60245	O60245	PCDH7_HUMAN	Protocadherin-7	-0.75043	-2.86804	2.21946	0.12979
PRPSAP2	O60256	O60256	KPRB_HUMAN	Phosphoribosyl pyrophosphate synthase-associated protein 2	-0.796504	-6.86472	8.01009	3.73832e-05
GNG7	O60262	O60262	GBG7_HUMAN	Guanine nucleotide-binding protein G(I)/G(S)/G(O) subunit gamma-7	-1.33541	-7.26148	8.63058	5.26316e-05
SMARCA5	O60264	O60264;P28370	SMCA5_HUMAN	SWI/SNF-related matrix-associated actin-dependent regulator of chromatin subfamily A member 5	0.21355	1.51312	0.864725	0.455586
GPRIN2	O60269	O60269	GRIN2_HUMAN	G protein-regulated inducer of neurite outgrowth 2	-0.43794	-1.54802	0.893046	0.444473
SPAG9	O60271	O60271	JIP4_HUMAN	C-Jun-amino-terminal kinase-interacting protein 4	-0.173807	-1.84275	1.14692	0.351095
ZNF292	O60281	O60281	ZN292_HUMAN	Zinc finger protein 292	-0.355625	-2.06843	1.35862	0.287155
KIF5C	O60282	O60282	KIF5C_HUMAN	Kinesin heavy chain isoform 5C	0.756992	3.6454	3.19698	0.0470678
URB1	O60287	O60287	NPA1P_HUMAN	Nucleolar pre-ribosomal-associated protein 1	-0.0760557	-0.652625	0.28652	0.776988
SIPA1L3	O60292	O60292	SI1L3_HUMAN	Signal-induced proliferation-associated 1-like protein 3	0.0147983	0.1372	0.0499158	0.957592
LCMT2	O60294	O60294	TYW4_HUMAN	tRNA wybutosine-synthesizing protein 4	-0.161939	-0.992873	0.487379	0.646092
LZTS3	O60299	O60299	LZTS3_HUMAN	Leucine zipper putative tumor suppressor 3	0.0179983	0.118641	0.0428549	0.962175
KATNIP	O60303	O60303	KATIP_HUMAN	Katanin-interacting protein	-0.466521	-1.94906	1.24481	0.319267
AQR	O60306	O60306	AQR_HUMAN	RNA helicase aquarius	-0.121619	-1.13835	0.584358	0.591487
MAST3	O60307	O60307	MAST3_HUMAN	Microtubule-associated serine/threonine-protein kinase 3	0.0412154	0.314467	0.122355	0.903303
OPA1	O60313	O60313	OPA1_HUMAN	Dynamin-like 120 kDa protein, mitochondrial	0.173208	1.12191	0.573065	0.597255
MCM3AP	O60318	O60318	GANP_HUMAN	Germinal-center associated nuclear protein	0.0619069	1.33759	0.727965	0.519304
PIP5K1C	O60331	O60331	PI51C_HUMAN	Phosphatidylinositol 4-phosphate 5-kinase type-1 gamma	-0.323368	-2.06932	1.35948	0.28706
KIF1B	O60333	O60333	KIF1B_HUMAN	Kinesin-like protein KIF1B	0.00805576	0.056222	0.0198198	0.982403
KDM1A	O60341	O60341	KDM1A_HUMAN	Lysine-specific histone demethylase 1A	0.0820915	0.732421	0.330375	0.747212
TBC1D4	O60343	O60343	TBCD4_HUMAN	TBC1 domain family member 4	-0.265353	-1.32788	0.720683	0.522848
FZD6	O60353	O60353	FZD6_HUMAN	Frizzled-6	-0.468539	-2.9322	2.29535	0.119741
PPL	O60437	O60437	PEPL_HUMAN	Periplakin	-0.932625	-4.05839	3.76074	0.0246942
GSDME	O60443	O60443	GSDME_HUMAN	Gasdermin-E	-0.247064	-1.19586	0.624536	0.56901
LY75	O60449	O60449	LY75_HUMAN	Lymphocyte antigen 75	-0.950846	-3.75692	3.34655	0.0397099
MAN1A2	O60476	O60476	MA1A2_HUMAN	Mannosyl-oligosaccharide 1,2-alpha-mannosidase IB	-0.12098	-1.05467	0.527764	0.621804
MPZL2	O60487	O60487	MPZL2_HUMAN	Myelin protein zero-like protein 2	-0.116153	-0.787616	0.361871	0.726279
ACSL4	O60488	O60488	ACSL4_HUMAN	Long-chain-fatty-acid--CoA ligase 4	-0.0654928	-0.427657	0.173448	0.861093
SNX3	O60493	O60493	SNX3_HUMAN	Sorting nexin-3	-0.0873876	-0.816356	0.378648	0.713125
STX10	O60499	O60499	STX10_HUMAN	Syntaxin-10	0.444686	2.45042	1.74931	0.202069
OGA	O60502	O60502	OGA_HUMAN	Protein O-GlcNAcase	-0.101131	-0.989076	0.484937	0.647114
SORBS3	O60504	O60504	VINEX_HUMAN	Vinexin	-0.567479	-2.09717	1.38662	0.280816
SYNCRIP	O60506	O60506	HNRPQ_HUMAN	Heterogeneous nuclear ribonucleoprotein Q	0.18758	1.14958	0.59212	0.586684
CDC40	O60508	O60508	PRP17_HUMAN	Pre-mRNA-processing factor 17	-0.0793699	-0.952302	0.46152	0.660736
B4GALT4	O60513	O60513	B4GT4_HUMAN	Beta-1,4-galactosyltransferase 4	-0.0838739	-0.334678	0.131198	0.895879
RANBP6	O60518	O60518	RNBP6_HUMAN	Ran-binding protein 6	0.0517431	0.222129	0.0834837	0.931533
NEMF	O60524	O60524	NEMF_HUMAN	Ribosome quality control complex subunit NEMF	-0.0122211	-0.141233	0.0514632	0.956564
GMDS	O60547	O60547	GMDS_HUMAN	GDP-mannose 4,6 dehydratase	-0.303987	-1.72403	1.04152	0.387032
NMT2	O60551	O60551	NMT2_HUMAN	Glycylpeptide N-tetradecanoyltransferase 2	-0.412492	-2.42388	1.72091	0.207892
CCNT1	O60563	O60563	CCNT1_HUMAN	Cyclin-T1	-0.943215	-4.15924	3.90227	0.021065
BUB1B	O60566	O60566	BUB1B_HUMAN	Mitotic checkpoint serine/threonine-protein kinase BUB1 beta	1.04086	2.94757	2.31368	0.117542
PLOD3	O60568	O60568	PLOD3_HUMAN	Multifunctional procollagen lysine hydroxylase and glycosyltransferase LH3	0.623416	3.39484	2.86889	0.0668155
EIF4E2	O60573	O60573	IF4E2_HUMAN	Eukaryotic translation initiation factor 4E type 2	0.082783	1.05703	0.529327	0.621242
TLR5	O60602	O60602	TLR5_HUMAN	Toll-like receptor 5	-0.550818	-2.46008	1.75969	0.200167
TLR2	O60603	O60603	TLR2_HUMAN	Toll-like receptor 2	-0.447252	-2.50927	1.81294	0.189527
DIAPH1	O60610	O60610	DIAP1_HUMAN	Protein diaphanous homolog 1	-0.111557	-1.0162	0.502481	0.63757
SELENOF	O60613	O60613	SEP15_HUMAN	Selenoprotein F	-0.00822778	-0.0830218	0.0295761	0.972886
TSPAN1	O60635	O60635	TSN1_HUMAN	Tetraspanin-1	-1.51355	-4.52658	4.42883	0.0111061
TSPAN3	O60637	O60637	TSN3_HUMAN	Tetraspanin-3	-0.563632	-1.81469	1.12164	0.3596
EXOC3	O60645	O60645	EXOC3_HUMAN	Exocyst complex component 3	-0.00118454	-0.0178272	0.0061902	0.992443
PLIN3	O60664	O60664	PLIN3_HUMAN	Perilipin-3	-0.69909	-4.53498	4.44104	0.0109548
RAD1	O60671	O60671	RAD1_HUMAN	Cell cycle checkpoint protein RAD1	-0.133655	-0.531747	0.22384	0.821905
PRMT3	O60678	O60678	ANM3_HUMAN	Protein arginine N-methyltransferase 3	-0.0261301	-0.147132	0.0537347	0.954224
KPNA6	O60684	O60684	IMA7_HUMAN	Importin subunit alpha-7	0.162571	1.36999	0.752494	0.507799
UGDH	O60701	O60701	UGDH_HUMAN	UDP-glucose 6-dehydrogenase	-0.240839	-1.05033	0.524883	0.624218
CTNND1	O60716	O60716	CTND1_HUMAN	Catenin delta-1	-0.202677	-2.28953	1.57994	0.237059
ICMT	O60725	O60725	ICMT_HUMAN	Protein-S-isoprenylcysteine O-methyltransferase	0.0936642	0.638569	0.279	0.782386
PLA2G6	O60733	O60733	PLPL9_HUMAN	85/88 kDa calcium-independent phospholipase A2	-0.10789	-0.594299	0.255713	0.799008
EIF1B	O60739	O60739	EIF1B_HUMAN	Eukaryotic translation initiation factor 1b	0.125372	0.89729	0.427286	0.681788
SNX2	O60749	Q13596;O60749	SNX2_HUMAN	Sorting nexin-2	-0.46364	-3.41968	2.9009	0.0645467
DPM1	O60762	O60762	DPM1_HUMAN	Dolichol-phosphate mannosyltransferase subunit 1	-0.520047	-4.41733	4.27054	0.013279
USO1	O60763	O60763	USO1_HUMAN	General vesicular transport factor p115	-0.142547	-1.14887	0.591633	0.586818
MRPS14	O60783	O60783	RT14_HUMAN	Small ribosomal subunit protein uS14m	0.0497552	0.278191	0.106786	0.915425
TOM1	O60784	O60784	TOM1_HUMAN	Target of Myb1 membrane trafficking protein	-0.905919	-5.45771	5.82283	0.00196296
H2BC10;H2BC12;H2BC14;H2BC15;H2BC18;H2BC5;H2BC9	O60814;P58876;P62807;Q5QNW6;Q93079;Q99877;Q99879	Q99879;P57053;Q5QNW6;Q16778;O60814;P62807;P23527;P06899;Q99880;Q99877;P33778;Q93079;Q8N257;Q96A08;P58876	H2B1C_HUMAN;H2B1D_HUMAN;H2B1H_HUMAN;H2B1K_HUMAN;H2B1M_HUMAN;H2B1N_HUMAN;H2B2F_HUMAN	Histone H2B type 1-K	-0.326983	-2.55068	1.85825	0.18195
PFKFB2	O60825	O60825	F262_HUMAN	6-phosphofructo-2-kinase/fructose-2,6-bisphosphatase 2	0.082716	0.464921	0.19111	0.84736
CCDC22	O60826	O60826	CCD22_HUMAN	Coiled-coil domain-containing protein 22	-0.0757351	-1.0277	0.509987	0.634321
PQBP1	O60828	O60828	PQBP1_HUMAN	Polyglutamine-binding protein 1	0.00437285	0.018196	0.00631918	0.992569
TIMM17B	O60830	O60830	TI17B_HUMAN	Mitochondrial import inner membrane translocase subunit Tim17-B	0.847049	3.50241	3.00835	0.0576268
PRAF2	O60831	O60831	PRAF2_HUMAN	PRA1 family protein 2	0.535429	2.98994	2.36446	0.111487
DKC1	O60832	O60832	DKC1_HUMAN	H/ACA ribonucleoprotein complex subunit DKC1	-0.363177	-2.93245	2.29566	0.119766
EIF5B	O60841	O60841	IF2P_HUMAN	Eukaryotic translation initiation factor 5B	0.261207	2.00383	1.29653	0.304781
TRIM13	O60858	O60858	TRI13_HUMAN	E3 ubiquitin-protein ligase TRIM13	-0.405108	-4.12504	3.85413	0.0222134
EDF1	O60869	O60869	EDF1_HUMAN	Endothelial differentiation-related factor 1	-0.100169	-0.916616	0.439204	0.675237
KIN	O60870	O60870	KIN17_HUMAN	DNA/RNA-binding protein KIN17	0.166811	1.37339	0.755087	0.507113
DIAPH2	O60879	O60879	DIAP2_HUMAN	Protein diaphanous homolog 2	-0.474958	-4.08202	3.79378	0.023899
DNAJA2	O60884	O60884	DNJA2_HUMAN	DnaJ homolog subfamily A member 2	0.0216717	0.177356	0.065529	0.945307
BRD4	O60885	Q15059;O60885	BRD4_HUMAN	Bromodomain-containing protein 4	0.0256673	0.239467	0.0905924	0.926371
CUTA	O60888	O60888	CUTA_HUMAN	Protein CutA	0.0738717	0.552644	0.234354	0.813635
OPHN1	O60890	O60890	OPHN1_HUMAN	Oligophrenin-1	-0.165056	-0.664313	0.29282	0.773427
SMPD2	O60906	O60906	NSMA_HUMAN	Sphingomyelin phosphodiesterase 2	-0.883033	-5.23152	5.4781	0.00302997
PFDN1	O60925	O60925	PFD1_HUMAN	Prefoldin subunit 1	-0.0569819	-0.61958	0.268937	0.789579
PPP1R11	O60927	O60927	PP1RB_HUMAN	E3 ubiquitin-protein ligase PPP1R11	-0.0161413	-0.154415	0.056553	0.951101
NBN	O60934	O60934	NBN_HUMAN	Nibrin	-0.0174913	-0.116591	0.0420812	0.962761
NOL3	O60936	O60936	NOL3_HUMAN	Nucleolar protein 3	-0.366079	-1.7636	1.07619	0.375311
DTNB	O60941	O60941	DTNB_HUMAN	Dystrobrevin beta	-0.57629	-2.53815	1.84449	0.184488
RNGTT	O60942	O60942	MCE1_HUMAN	mRNA-capping enzyme	-0.0558196	-0.359499	0.142224	0.887086
ABCB7	O75027	O75027	ABCB7_HUMAN	Iron-sulfur clusters transporter ABCB7, mitochondrial	0.117226	0.784524	0.360082	0.727123
SRGAP2	O75044	O75044;Q7Z6B7	SRGP2_HUMAN	SLIT-ROBO Rho GTPase-activating protein 2	-0.207284	-0.840794	0.393117	0.703893
NOS1AP	O75052	O75052	CAPON_HUMAN	Carboxyl-terminal PDZ ligand of neuronal nitric oxide synthase protein	0.710893	2.78954	2.12786	0.141835
IGSF3	O75054	O75054	IGSF3_HUMAN	Immunoglobulin superfamily member 3	0.524068	2.48415	1.78566	0.194781
SDC3	O75056	O75056	SDC3_HUMAN	Syndecan-3	-0.636802	-4.4103	4.2604	0.0133333
FAM20B	O75063	O75063	XYLK_HUMAN	Glycosaminoglycan xylosylkinase	-0.247865	-1.74763	1.06215	0.380251
DENND4B	O75064	O75064	DEN4B_HUMAN	DENN domain-containing protein 4B	0.165251	1.21754	0.639946	0.560731
EFCAB14	O75071	O75071	EFC14_HUMAN	EF-hand calcium-binding domain-containing protein 14	-0.0351294	-0.158159	0.0580077	0.950453
WDR1	O75083	O75083	WDR1_HUMAN	WD repeat-containing protein 1	-0.0907617	-0.682141	0.302511	0.767141
FZD7	O75084	O75084	FZD7_HUMAN	Frizzled-7	0.0477359	0.271271	0.10386	0.917606
SLIT3	O75094	O75094	SLIT3_HUMAN	Slit homolog 3 protein	-0.0422402	-0.260519	0.0993417	0.919956
ATP9A	O75110	O75110	ATP9A_HUMAN	Probable phospholipid-transporting ATPase IIA	0.19988	1.34419	0.732932	0.517491
N4BP1	O75113	O75113	N4BP1_HUMAN	NEDD4-binding protein 1	-0.453905	-3.06456	2.45486	0.101737
ROCK2	O75116	O75116	ROCK2_HUMAN	Rho-associated protein kinase 2	-0.105016	-1.20913	0.633954	0.563401
CLASP2	O75122	O75122	CLAP2_HUMAN	CLIP-associating protein 2	-0.26995	-1.93048	1.22747	0.324922
PTCD1	O75127	O75127	PTCD1_HUMAN	Pentatricopeptide repeat-containing protein 1, mitochondrial	0.327941	2.10923	1.39844	0.277783
COBL	O75128	O75128	COBL_HUMAN	Protein cordon-bleu	-0.84825	-5.09086	5.26543	0.00409756
CPNE3	O75131	O75131	CPNE3_HUMAN	Copine-3	-0.0921296	-0.835573	0.390011	0.705477
DEPDC5	O75140	O75140	DEPD5_HUMAN	GATOR complex protein DEPDC5	-0.622445	-4.14711	3.88517	0.0213854
ATG13	O75143	O75143	ATG13_HUMAN	Autophagy-related protein 13	0.186737	1.42337	0.79361	0.490557
ICOSLG	O75144	O75144	ICOSL_HUMAN	ICOS ligand	-0.645432	-2.83252	2.17784	0.134659
HIP1R	O75146	O75146	HIP1R_HUMAN	Huntingtin-interacting protein 1-related protein	0.221948	1.08744	0.549663	0.609582
OBSL1	O75147	O75147	OBSL1_HUMAN	Obscurin-like protein 1	0.116529	0.861372	0.405447	0.69621
RNF40	O75150	O75150	BRE1B_HUMAN	E3 ubiquitin-protein ligase BRE1B	0.0526649	0.496815	0.206561	0.835778
PHF2	O75151	O75151	PHF2_HUMAN	Lysine-specific demethylase PHF2	-0.478158	-4.51094	4.40608	0.011345
ZC3H11A	O75152	O75152	ZC11A_HUMAN	Zinc finger CCCH domain-containing protein 11A	-0.111528	-0.958721	0.465577	0.658803
CLUH	O75153	O75153	CLU_HUMAN	Clustered mitochondria protein homolog	0.127797	1.0547	0.527778	0.622042
CAND2	O75155	O75155	CAND2_HUMAN	Cullin-associated NEDD8-dissociated protein 2	-0.321732	-1.75487	1.0685	0.37777
TSC22D2	O75157	O75157	T22D2_HUMAN	TSC22 domain family protein 2	-0.0508682	-0.190212	0.0706253	0.941548
NPHP4	O75161	O75161	NPHP4_HUMAN	Nephrocystin-4	-0.890088	-4.0256	3.71504	0.0260069
KDM4A	O75164	O75164	KDM4A_HUMAN	Lysine-specific demethylase 4A	0.058567	0.446667	0.182406	0.853659
DNAJC13	O75165	O75165	DJC13_HUMAN	DnaJ homolog subfamily C member 13	-0.0314939	-0.361496	0.143119	0.886304
PHACTR2	O75167	O75167	PHAR2_HUMAN	Phosphatase and actin regulator 2	-0.168118	-0.950866	0.460615	0.661055
PPP6R2	O75170	O75170	PP6R2_HUMAN	Serine/threonine-protein phosphatase 6 regulatory subunit 2	-0.676327	-4.8189	4.85857	0.00638114
CNOT3	O75175	O75175	CNOT3_HUMAN	CCR4-NOT transcription complex subunit 3	-0.0535284	-0.623895	0.271214	0.788246
ANKRD17	O75179	O75179	ANR17_HUMAN	Ankyrin repeat domain-containing protein 17	0.0228753	0.170695	0.0629074	0.947493
SIN3B	O75182	O75182	SIN3B_HUMAN	Paired amphipathic helix protein Sin3b	0.213519	1.66609	0.991619	0.404231
DNAJB6	O75190	O75190	DNJB6_HUMAN	DnaJ homolog subfamily B member 6	-0.782495	-4.20926	3.97298	0.0193447
XYLB	O75191	O75191	XYLB_HUMAN	Xylulose kinase	-0.0554643	-0.254084	0.0966535	0.921291
COQ9	O75208	O75208	COQ9_HUMAN	Ubiquinone biosynthesis protein COQ9, mitochondrial	0.0544262	0.391389	0.15666	0.873976
GGCT	O75223	O75223	GGCT_HUMAN	Gamma-glutamylcyclotransferase	0.105151	0.571256	0.243832	0.806358
NDUFS7	O75251	O75251	NDUS7_HUMAN	NADH dehydrogenase [ubiquinone] iron-sulfur protein 7, mitochondrial	-0.269208	-1.71096	1.03018	0.390796
NDUFS2	O75306	O75306	NDUS2_HUMAN	NADH dehydrogenase [ubiquinone] iron-sulfur protein 2, mitochondrial	-0.260622	-2.05042	1.34119	0.292808
CDH16	O75309	O75309	CAD16_HUMAN	Cadherin-16	-0.533558	-1.70472	1.02478	0.393658
ZPR1	O75312	O75312	ZPR1_HUMAN	Zinc finger protein ZPR1	-0.0249558	-0.219904	0.0825777	0.93199
USP12	O75317	O75317;P62068	UBP12_HUMAN	Ubiquitin carboxyl-terminal hydrolase 12	-0.12474	-0.717844	0.322216	0.754269
DUSP11	O75319	O75319	DUS11_HUMAN	RNA/RNP complex-1-interacting phosphatase	-0.0595974	-0.381982	0.15237	0.878527
NIPSNAP2	O75323	O75323	NIPS2_HUMAN	Protein NipSnap homolog 2	-0.00387792	-0.0242968	0.00845825	0.991284
CILP	O75339	O75339	CILP1_HUMAN	Cartilage intermediate layer protein 1	-0.553354	-2.17639	1.46501	0.261723
PDCD6	O75340	O75340	PDCD6_HUMAN	Programmed cell death protein 6	-0.139704	-0.859221	0.404152	0.696618
ALOX12B	O75342	O75342	LX12B_HUMAN	Arachidonate 12-lipoxygenase, 12R-type	0.477765	1.04904	0.524035	0.624893
TBCA	O75347	O75347	TBCA_HUMAN	Tubulin-specific chaperone A	-0.30767	-2.21513	1.50397	0.253555
ATP6V1G1	O75348	O75348	VATG1_HUMAN	V-type proton ATPase subunit G 1	-0.245575	-1.26945	0.677457	0.543046
VPS4B	O75351	O75351	VPS4B_HUMAN	Vacuolar protein sorting-associated protein 4B	-0.0180238	-0.192453	0.0715188	0.940992
MPDU1	O75352	O75352	MPU1_HUMAN	Mannose-P-dolichol utilization defect 1 protein	-0.177024	-1.09889	0.557393	0.605866
ENTPD5	O75356	O75356	ENTP5_HUMAN	Nucleoside diphosphate phosphatase ENTPD5	0.160812	1.0609	0.5319	0.620636
ZNF217	O75362	O75362	ZN217_HUMAN	Zinc finger protein 217	0.400563	3.92824	3.58024	0.0304416
MACROH2A1	O75367	O75367	H2AY_HUMAN	Core histone macro-H2A.1	-0.386605	-2.69987	2.02503	0.155786
SH3BGRL	O75368	O75368	SH3L1_HUMAN	Adapter SH3BGRL	-0.425465	-3.44822	2.93783	0.0620094
FLNB	O75369	O75369	FLNB_HUMAN	Filamin-B	-0.354834	-2.33706	1.62926	0.225181
NCOR1	O75376	O75376;Q9Y618	NCOR1_HUMAN	Nuclear receptor corepressor 1	-0.218239	-2.62281	1.93819	0.169325
NDUFS6	O75380	O75380	NDUS6_HUMAN	NADH dehydrogenase [ubiquinone] iron-sulfur protein 6, mitochondrial	-0.180357	-1.35923	0.744314	0.512041
PEX14	O75381	O75381	PEX14_HUMAN	Peroxisomal membrane protein PEX14	0.16334	1.76126	1.07412	0.375662
TRIM3	O75382	O75382	TRIM3_HUMAN	Tripartite motif-containing protein 3	-0.104862	-0.836539	0.390585	0.705156
TULP3	O75386	O75386	TULP3_HUMAN	Tubby-related protein 3	-0.353212	-2.10547	1.39475	0.278681
CS	O75390	O75390	CISY_HUMAN	Citrate synthase, mitochondrial	0.649769	3.96925	3.63684	0.0286696
SPAG7	O75391	O75391	SPAG7_HUMAN	Sperm-associated antigen 7	-0.54376	-3.87677	3.50954	0.0331925
SEC22B	O75396	O75396	SC22B_HUMAN	Vesicle-trafficking protein SEC22b	0.0776622	0.640652	0.28011	0.781832
PRPF40A	O75400	O75400	PR40A_HUMAN	Pre-mRNA-processing factor 40 homolog A	0.087897	0.835422	0.389921	0.705466
TACC1	O75410	O75410;O95359	TACC1_HUMAN	Transforming acidic coiled-coil-containing protein 1	-0.985533	-4.21681	3.98369	0.0191429
NME6	O75414	O75414	NDK6_HUMAN	Nucleoside diphosphate kinase 6	0.141323	0.972711	0.474464	0.653719
GIGYF1	O75420	O75420	GGYF1_HUMAN	GRB10-interacting GYF protein 1	-0.0533008	-0.902479	0.430475	0.680132
LRCH4	O75427	O75427	LRCH4_HUMAN	Leucine-rich repeat and calponin homology domain-containing protein 4	-0.0524894	-0.597304	0.257275	0.797789
MTX2	O75431	O75431	MTX2_HUMAN	Metaxin-2	0.162477	1.21353	0.637089	0.562207
VPS26A	O75436	O75436	VP26A_HUMAN	Vacuolar protein sorting-associated protein 26A	-0.128429	-1.02089	0.505539	0.636393
NDUFB1	O75438	O75438	NDUB1_HUMAN	NADH dehydrogenase [ubiquinone] 1 beta subcomplex subunit 1	-0.362333	-2.37072	1.66456	0.218122
PMPCB	O75439	O75439	MPPB_HUMAN	Mitochondrial-processing peptidase subunit beta	0.424248	2.98945	2.36387	0.111532
MED24	O75448	O75448	MED24_HUMAN	Mediator of RNA polymerase II transcription subunit 24	-0.0858956	-0.925779	0.444896	0.67127
KATNA1	O75449	O75449	KTNA1_HUMAN	Katanin p60 ATPase-containing subunit A1	-0.327299	-2.24255	1.53179	0.246927
ZNF324	O75467	Q6AW86;O75467	Z324A_HUMAN	Zinc finger protein 324A	0.998603	1.49487	0.850065	0.463663
PSIP1	O75475	O75475	PSIP1_HUMAN	PC4 and SFRS1-interacting protein	0.0361569	0.197176	0.073406	0.939275
ERLIN1	O75477	O75477	ERLN1_HUMAN	Erlin-1	-0.895323	-5.79003	6.33428	0.000871595
SUPT3H	O75486	O75486	SUPT3_HUMAN	Transcription initiation protein SPT3 homolog	-0.00616465	-0.0433737	0.0152133	0.98688
GPC4	O75487	O75487	GPC4_HUMAN	Glypican-4	0.0873695	0.315512	0.122809	0.902974
NDUFS3	O75489	O75489	NDUS3_HUMAN	NADH dehydrogenase [ubiquinone] iron-sulfur protein 3, mitochondrial	-0.271573	-2.00915	1.30159	0.302837
SRSF10	O75494	O75494	SRS10_HUMAN	Serine/arginine-rich splicing factor 10	-0.15327	-1.53154	0.879625	0.449958
CLN5	O75503	O75503	CLN5_HUMAN	Ceroid-lipofuscinosis neuronal protein 5	-0.560326	-2.67417	1.9959	0.160206
HSBP1	O75506	O75506	HSBP1_HUMAN	Heat shock factor-binding protein 1	-1.406	-9.6874	12.3345	0
ECI2	O75521	O75521	ECI2_HUMAN	Enoyl-CoA delta isomerase 2	-0.0640818	-0.517712	0.216853	0.827041
KHDRBS3	O75525	O75525	KHDR3_HUMAN	KH domain-containing, RNA-binding, signal transduction-associated protein 3	0.0110131	0.0428408	0.0150233	0.986846
TADA3	O75528	O75528	TADA3_HUMAN	Transcriptional adapter 3	-0.0514065	-0.484492	0.200554	0.841319
TAF5L	O75529	O75529	TAF5L_HUMAN	TAF5-like RNA polymerase II p300/CBP-associated factor-associated factor 65 kDa subunit 5L	-0.0655341	-0.712168	0.319056	0.75609
EED	O75530	O75530	EED_HUMAN	Polycomb protein EED	0.145366	1.28264	0.687122	0.538825
BANF1	O75531	O75531	BAF_HUMAN	Barrier-to-autointegration factor	-0.632055	-5.40678	5.74495	0.00206452
SF3B1	O75533	O75533	SF3B1_HUMAN	Splicing factor 3B subunit 1	0.00872849	0.0841859	0.0300044	0.972501
CSDE1	O75534	O75534	CSDE1_HUMAN	Cold shock domain-containing protein E1	0.245044	2.11636	1.40544	0.275796
WBP4	O75554	O75554	WBP4_HUMAN	WW domain-binding protein 4	0.00654783	0.0366379	0.0128167	0.988582
SKAP2	O75563	O75563	SKAP2_HUMAN	Src kinase-associated phosphoprotein 2	-1.22119	-4.94599	5.04793	0.00517345
PRKRA	O75569	O75569	PRKRA_HUMAN	Interferon-inducible double-stranded RNA-dependent protein kinase activator A	0.46044	4.22931	4.00141	0.0186099
MTRF1	O75570	O75570	RF1M_HUMAN	Peptide chain release factor 1, mitochondrial	0.481865	2.02913	1.3207	0.297968
LRP6	O75581	O75581	LRP6_HUMAN	Low-density lipoprotein receptor-related protein 6	0.101228	0.654643	0.287605	0.777062
RPS6KA5	O75582	O75582	KS6A5_HUMAN	Ribosomal protein S6 kinase alpha-5	-0.374291	-2.10777	1.39701	0.278124
MED6	O75586	O75586	MED6_HUMAN	Mediator of RNA polymerase II transcription subunit 6	-0.0319751	-0.225848	0.0850011	0.930116
MYCBP2	O75592	O75592	MYCB2_HUMAN	E3 ubiquitin-protein ligase MYCBP2	-0.219219	-2.82658	2.1709	0.135614
GCAT	O75600	O75600	KBL_HUMAN	2-amino-3-ketobutyrate coenzyme A ligase, mitochondrial	0.478051	1.26445	0.673805	0.544233
SPAG6	O75602	O75602	SPAG6_HUMAN	Sperm-associated antigen 6	-2.8115	-6.26951	7.07943	0.000383234
NPM3	O75607	O75607	NPM3_HUMAN	Nucleoplasmin-3	0.24251	1.25138	0.664299	0.547542
LYPLA1	O75608	O75608	LYPA1_HUMAN	Acyl-protein thioesterase 1	0.133031	0.849599	0.398377	0.700608
ERAL1	O75616	O75616	ERAL1_HUMAN	GTPase Era, mitochondrial	0.213137	1.13923	0.584968	0.591251
REM1	O75628	O75628	REM1_HUMAN	GTP-binding protein REM 1	-0.40734	-2.08097	1.37081	0.284822
SERPINB7	O75635	O75635	SPB7_HUMAN	Serpin B7	0.368373	1.19076	0.620928	0.571005
SNRNP200	O75643	O75643	U520_HUMAN	U5 small nuclear ribonucleoprotein 200 kDa helicase	-0.0674454	-0.640417	0.279985	0.781741
TRMU	O75648	O75648	MTU1_HUMAN	Mitochondrial tRNA-specific 2-thiouridylase 1	-0.0666358	-0.354941	0.140186	0.888503
TIPRL	O75663	O75663	TIPRL_HUMAN	TIP41-like protein	0.151945	1.95575	1.25109	0.318167
OFD1	O75665	O75665	OFD1_HUMAN	Centriole and centriolar satellite protein OFD1	-0.596568	-3.55323	3.07498	0.053692
TOM1L1	O75674	O75674	TM1L1_HUMAN	TOM1-like protein 1	-1.0103	-5.99388	6.65026	0.000716418
RPS6KA4	O75676	O75676	KS6A4_HUMAN	Ribosomal protein S6 kinase alpha-4	-0.339693	-2.53345	1.83935	0.185554
SURF6	O75683	O75683	SURF6_HUMAN	Surfeit locus protein 6	-0.441131	-4.52127	4.4211	0.0111744
PPM1B	O75688	O75688	PPM1B_HUMAN	Protein phosphatase 1B	0.0698923	0.666	0.293733	0.772953
ADAP1	O75689	O75689	ADAP1_HUMAN	Arf-GAP with dual PH domain-containing protein 1	-1.06385	-4.21148	3.97614	0.0192947
UTP20	O75691	O75691	UTP20_HUMAN	Small subunit processome component 20 homolog	-0.112774	-0.938436	0.452802	0.665613
NUP155	O75694	O75694	NU155_HUMAN	Nuclear pore complex protein Nup155	0.128828	1.803	1.11117	0.362791
RP2	O75695	O75695	XRP2_HUMAN	Protein XRP2	-0.247371	-1.53255	0.880448	0.449676
STK16	O75716	O75716	STK16_HUMAN	Serine/threonine-protein kinase 16	-0.144699	-0.981787	0.480262	0.649736
WDHD1	O75717	O75717	WDHD1_HUMAN	WD repeat and HMG-box DNA-binding protein 1	0.457637	2.03675	1.32802	0.296101
CRTAP	O75718	O75718	CRTAP_HUMAN	Cartilage-associated protein	0.509734	4.71414	4.70359	0.0079779
SLC25A12	O75746	O75746	S2512_HUMAN	Electrogenic aspartate/glutamate antiporter SLC25A12, mitochondrial	0.293859	1.52985	0.878254	0.450198
TCEA3	O75764	O75764	TCEA3_HUMAN	Transcription elongation factor A protein 3	-0.480265	-2.15013	1.43883	0.267658
PALM	O75781	O75781	PALM_HUMAN	Paralemmin-1	-1.0328	-3.9534	3.61494	0.0293628
ATP6AP2	O75787	O75787	RENR_HUMAN	Renin receptor	0.0292096	0.424864	0.172141	0.862308
GRAP2	O75791	O75791	GRAP2_HUMAN	GRB2-related adapter protein 2	-1.09911	-5.09646	5.27386	0.00401961
RNASEH2A	O75792	O75792	RNH2A_HUMAN	Ribonuclease H2 subunit A	-0.185974	-1.53058	0.878846	0.449929
CDC123	O75794	O75794	CD123_HUMAN	Cell division cycle protein 123 homolog	0.266277	1.342	0.731287	0.517802
ZMYND10	O75800	O75800	ZMY10_HUMAN	Zinc finger MYND domain-containing protein 10	-1.67452	-4.50521	4.39776	0.0114739
BCAR3	O75815	O75815	BCAR3_HUMAN	Breast cancer anti-estrogen resistance protein 3	0.105804	0.617427	0.267803	0.789871
POP7	O75817	O75817	POP7_HUMAN	Ribonuclease P protein subunit p20	0.114824	1.31798	0.713278	0.526222
RPP40	O75818	O75818	RPP40_HUMAN	Ribonuclease P protein subunit p40	0.398829	3.37671	2.8456	0.0684051
ZNF189	O75820	O75820	ZN189_HUMAN	Zinc finger protein 189	-0.125187	-0.95555	0.463572	0.660089
EIF3G	O75821	O75821	EIF3G_HUMAN	Eukaryotic translation initiation factor 3 subunit G	-0.0526555	-0.487027	0.201786	0.840009
EIF3J	O75822	O75822	EIF3J_HUMAN	Eukaryotic translation initiation factor 3 subunit J	-0.0709865	-0.610175	0.263995	0.793678
CBR3	O75828	O75828	CBR3_HUMAN	Carbonyl reductase [NADPH] 3	-0.441181	-1.58252	0.921411	0.432765
PSMD10	O75832	O75832	PSD10_HUMAN	26S proteasome non-ATPase regulatory subunit 10	-0.0981981	-1.08145	0.545636	0.611839
AP1G2	O75843	O75843	AP1G2_HUMAN	AP-1 complex subunit gamma-like 2	-0.11616	-0.581162	0.24892	0.803437
ZMPSTE24	O75844	O75844	FACE1_HUMAN	CAAX prenyl protease 1 homolog	0.178568	1.45784	0.820627	0.478873
IDH1	O75874	O75874	IDHC_HUMAN	Isocitrate dehydrogenase [NADP] cytoplasmic	0.521357	2.66763	1.98852	0.161242
GATB	O75879	O75879	GATB_HUMAN	Glutamyl-tRNA(Gln) amidotransferase subunit B, mitochondrial	0.198105	1.6662	0.991706	0.404388
SCO1	O75880	O75880	SCO1_HUMAN	Protein SCO1 homolog, mitochondrial	-0.110902	-0.71056	0.318163	0.756556
CYP7B1	O75881	O75881	CP7B1_HUMAN	Cytochrome P450 7B1	-0.843901	-3.44913	2.93901	0.0620236
ATRN	O75882	O75882	ATRN_HUMAN	Attractin	0.268027	1.84687	1.15065	0.350105
RBBP9	O75884	O75884	RBBP9_HUMAN	Serine hydrolase RBBP9	-0.202394	-1.39929	0.774948	0.499474
STAM2	O75886	O75886	STAM2_HUMAN	Signal transducing adapter molecule 2	-0.340488	-3.2001	2.62208	0.0863902
TUSC2	O75896	O75896	TUSC2_HUMAN	Tumor suppressor candidate 2	-0.239366	-2.01999	1.31195	0.300324
DGAT1	O75907	O75907	DGAT1_HUMAN	Diacylglycerol O-acyltransferase 1	0.200982	1.09997	0.558126	0.605845
CCNK	O75909	O75909	CCNK_HUMAN	Cyclin-K	-0.0629666	-0.553803	0.234941	0.813064
DHRS3	O75911	O75911	DHRS3_HUMAN	Short-chain dehydrogenase/reductase 3	0.522757	1.35806	0.74342	0.512171
ARL6IP5	O75915	O75915	PRAF3_HUMAN	PRA1 family protein 3	-0.563479	-3.34329	2.80283	0.071301
PIAS1	O75925	O75925	PIAS1_HUMAN	E3 SUMO-protein ligase PIAS1	-0.32176	-2.24837	1.53773	0.245846
PIAS2	O75928	Q9Y6X2;O75928	PIAS2_HUMAN	E3 SUMO-protein ligase PIAS2	-0.0332843	-0.299084	0.115706	0.907626
BCAS2	O75934	O75934	SPF27_HUMAN	Pre-mRNA-splicing factor SPF27	-0.0469238	-0.445239	0.181729	0.854011
DCTN3	O75935	O75935	DCTN3_HUMAN	Dynactin subunit 3	-0.123985	-1.2606	0.671004	0.54535
BBOX1	O75936	O75936	BODG_HUMAN	Gamma-butyrobetaine dioxygenase	-0.667331	-1.91875	1.21657	0.328922
DNAJC8	O75937	O75937	DNJC8_HUMAN	DnaJ homolog subfamily C member 8	-0.0250753	-0.246827	0.0936366	0.924532
SMNDC1	O75940	O75940	SPF30_HUMAN	Survival of motor neuron-related-splicing factor 30	0.0141369	0.140969	0.0513618	0.956467
RAD17	O75943	O75943	RAD17_HUMAN	Cell cycle checkpoint protein RAD17	-0.269112	-1.62055	0.953097	0.419538
ATP5PD	O75947	O75947	ATP5H_HUMAN	ATP synthase subunit d, mitochondrial	-0.0875259	-0.457941	0.187769	0.850028
TSPAN9	O75954	O75954	TSN9_HUMAN	Tetraspanin-9	-0.458677	-1.93782	1.23431	0.323014
FLOT1	O75955	O75955	FLOT1_HUMAN	Flotillin-1	-0.362759	-2.19919	1.48789	0.256772
TRIO	O75962	O75962	TRIO_HUMAN	Triple functional domain protein	0.314719	2.59872	1.91135	0.173057
ATP5MG	O75964	O75964	ATP5L_HUMAN	ATP synthase subunit g, mitochondrial	-0.17765	-0.925929	0.44499	0.671411
MPDZ	O75970	O75970	MPDZ_HUMAN	Multiple PDZ domain protein	-0.381519	-2.45518	1.75442	0.20081
CPD	O75976	O75976	CBPD_HUMAN	Carboxypeptidase D	-0.379324	-1.6586	0.985238	0.406467
GLRX3	O76003	O76003	GLRX3_HUMAN	Glutaredoxin-3	0.512686	3.25893	2.69585	0.0802102
RSL1D1	O76021	O76021	RL1D1_HUMAN	Ribosomal L1 domain-containing protein 1	0.0462892	0.337981	0.132655	0.894973
WFS1	O76024	O76024	WFS1_HUMAN	Wolframin	-0.576962	-3.08346	2.47794	0.10006
ANXA9	O76027	O76027	ANXA9_HUMAN	Annexin A9	-1.5165	-3.50689	3.01421	0.0572972
CLPX	O76031	O76031	CLPX_HUMAN	ATP-dependent Clp protease ATP-binding subunit clpX-like, mitochondrial	0.339925	3.16939	2.58385	0.0898553
SEC14L2	O76054	O76054	S14L2_HUMAN	SEC14-like protein 2	-0.349443	-1.61856	0.951427	0.419666
TM7SF2	O76062	O76062	ERG24_HUMAN	Delta(14)-sterol reductase TM7SF2	-0.156784	-1.01056	0.498817	0.639492
SNCG	O76070	O76070	SYUG_HUMAN	Gamma-synuclein	-1.35102	-3.4707	2.96703	0.0599713
CIAO1	O76071	O76071	CIAO1_HUMAN	Probable cytosolic iron-sulfur protein assembly protein CIAO1	-0.0383639	-0.520316	0.218145	0.826186
PDE5A	O76074	O76074	PDE5A_HUMAN	cGMP-specific 3',5'-cyclic phosphodiesterase	-0.343362	-1.2871	0.690397	0.537179
DFFB	O76075	O76075	DFFB_HUMAN	DNA fragmentation factor subunit beta	0.0440491	0.297379	0.114973	0.908322
SRP72	O76094	O76094	SRP72_HUMAN	Signal recognition particle subunit SRP72	0.094138	1.01486	0.501607	0.638052
DXO	O77932	O77932	DXO_HUMAN	Decapping and exoribonuclease protein	0.19438	0.954502	0.462909	0.660316
DDAH1	O94760	O94760	DDAH1_HUMAN	N(G),N(G)-dimethylarginine dimethylaminohydrolase 1	-1.4448	-7.29338	8.6804	5.47945e-05
RECQL5	O94762	O94762	RECQ5_HUMAN	ATP-dependent DNA helicase Q5	-0.173865	-1.5264	0.875454	0.451494
URI1	O94763	O94763	RMP_HUMAN	Unconventional prefoldin RPB5 interactor 1	-0.0296837	-0.228784	0.0862021	0.929384
B3GAT3	O94766	Q9NPZ5;O94766	B3GA3_HUMAN	Galactosylgalactosylxylosylprotein 3-beta-glucuronosyltransferase 3	-0.132029	-0.93109	0.448207	0.669011
STK17B	O94768	O94768	ST17B_HUMAN	Serine/threonine-protein kinase 17B	-0.0481437	-0.285823	0.110029	0.912228
MTA2	O94776	O94776	MTA2_HUMAN	Metastasis-associated protein MTA2	0.318782	2.74814	2.08015	0.148408
ALDH1A2	O94788	O94788	AL1A2_HUMAN	Retinal dehydrogenase 2	-2.62598	-8.93088	11.2035	0
STK10	O94804	O94804	STK10_HUMAN	Serine/threonine-protein kinase 10	-0.322871	-1.75191	1.0659	0.378645
GFPT2	O94808	O94808	GFPT2_HUMAN	Glutamine--fructose-6-phosphate aminotransferase [isomerizing] 2	0.435999	2.20502	1.49376	0.255241
TPPP	O94811	O94811	TPPP_HUMAN	Tubulin polymerization-promoting protein	-1.32029	-5.1034	5.28432	0.00397044
SLIT2	O94813	O94813	SLIT2_HUMAN	Slit homolog 2 protein	-0.923644	-3.0304	2.41333	0.106546
KBTBD11	O94819	O94819	KBTBB_HUMAN	Kelch repeat and BTB domain-containing protein 11	-1.65489	-6.02448	6.69781	0.000693878
LTN1	O94822	O94822	LTN1_HUMAN	E3 ubiquitin-protein ligase listerin	0.12243	1.03053	0.511846	0.633549
TOMM70	O94826	O94826	TOM70_HUMAN	Mitochondrial import receptor subunit TOM70	0.155574	1.10192	0.559448	0.605211
IPO13	O94829	O94829	IPO13_HUMAN	Importin-13	-0.156181	-1.42816	0.797337	0.48885
DDHD2	O94830	O94830	DDHD2_HUMAN	Phospholipase DDHD2	-0.176338	-0.944147	0.456386	0.663331
MYO1D	O94832	O94832	MYO1D_HUMAN	Unconventional myosin-Id	-0.532796	-5.62825	6.08465	0.00124746
TOX4	O94842	O94842	TOX4_HUMAN	TOX high mobility group box family member 4	0.00855371	0.0603285	0.0213017	0.980747
SEC24D	O94855	O94855	SC24D_HUMAN	Protein transport protein Sec24D	0.142601	0.985305	0.482516	0.648513
NFASC	O94856	O94856	NFASC_HUMAN	Neurofascin	-0.150728	-0.272461	0.104362	0.917059
SUPT7L	O94864	O94864	ST65G_HUMAN	STAGA complex 65 subunit gamma	-0.0804452	-0.582714	0.249719	0.803104
FCHSD2	O94868	O94868	FCSD2_HUMAN	F-BAR and double SH3 domains protein 2	0.204237	1.77803	1.08895	0.370812
UFL1	O94874	Q92845;O94874	UFL1_HUMAN	E3 UFM1-protein ligase 1	-0.39191	-3.86013	3.48678	0.0340331
SORBS2	O94875	O94875	SRBS2_HUMAN	Sorbin and SH3 domain-containing protein 2	-1.40313	-5.18599	5.40911	0.00341053
TMCC1	O94876	O94876	TMCC1_HUMAN	Transmembrane and coiled-coil domains protein 1	-0.16486	-0.842435	0.394096	0.703379
PHF14	O94880	O94880	PHF14_HUMAN	PHD finger protein 14	-0.425372	-4.15152	3.8914	0.0213249
TMEM63A	O94886	O94886	CSCL1_HUMAN	CSC1-like protein 1	-0.296996	-1.23855	0.65503	0.553325
FARP2	O94887	O94887	FARP2_HUMAN	FERM, ARHGEF and pleckstrin domain-containing protein 2	-0.308853	-2.589	1.90055	0.174763
UBXN7	O94888	O94888	UBXN7_HUMAN	UBX domain-containing protein 7	-0.0115608	-0.0818395	0.0291415	0.973153
LRIG2	O94898	O94898	LRIG2_HUMAN	Leucine-rich repeats and immunoglobulin-like domains protein 2	-0.266865	-1.56298	0.905298	0.437945
SUN1	O94901	O94901	SUN1_HUMAN	SUN domain-containing protein 1	-0.157518	-1.77062	1.08239	0.372936
PLPBP	O94903	O94903	PLPHP_HUMAN	Pyridoxal phosphate homeostasis protein	-0.454611	-3.10179	2.5004	0.0973376
ERLIN2	O94905	O94905	ERLN2_HUMAN	Erlin-2	-0.899794	-5.67546	6.15737	0.00111268
PRPF6	O94906	O94906	PRP6_HUMAN	Pre-mRNA-processing factor 6	-0.0330164	-0.238662	0.0902603	0.926281
ADGRL1	O94910	O94910	AGRL1_HUMAN	Adhesion G protein-coupled receptor L1	-0.270785	-1.54957	0.89431	0.443808
ABCA8	O94911	O94911	ABCA8_HUMAN	ABC-type organic anion transporter ABCA8	-0.730723	-2.38414	1.67871	0.216003
PCF11	O94913	O94913	PCF11_HUMAN	Pre-mRNA cleavage complex 2 protein Pcf11	-0.155179	-2.1701	1.45871	0.263122
FRYL	O94915	O94915	FRYL_HUMAN	Protein furry homolog-like	-0.0563786	-0.532114	0.224023	0.821764
ENDOD1	O94919	O94919	ENDD1_HUMAN	Endonuclease domain-containing 1 protein	-0.188672	-1.17306	0.608485	0.578657
GLCE	O94923	O94923	GLCE_HUMAN	D-glucuronyl C5-epimerase	-0.518704	-2.71195	2.03877	0.154392
GLS	O94925	O94925	GLSK_HUMAN	Glutaminase kidney isoform, mitochondrial	0.170234	0.906236	0.432788	0.679342
HAUS5	O94927	O94927	HAUS5_HUMAN	HAUS augmin-like complex subunit 5	0.0930908	0.487245	0.201892	0.839985
FBXO21	O94952	O94952	FBX21_HUMAN	F-box only protein 21	-1.1033	-4.98569	5.10737	0.00480357
KDM4B	O94953	O94953	KDM4B_HUMAN	Lysine-specific demethylase 4B	-0.166923	-0.746037	0.338056	0.741458
SOGA1	O94964	O94964	SOGA1_HUMAN	Protein SOGA1	0.356425	3.12371	2.52736	0.0945548
USP19	O94966	O94966	UBP19_HUMAN	Ubiquitin carboxyl-terminal hydrolase 19	-0.0980962	-1.25785	0.669001	0.546067
WDR47	O94967	O94967	WDR47_HUMAN	WD repeat-containing protein 47	-0.442701	-2.71239	2.03926	0.154369
AP2A2	O94973	O94973	AP2A2_HUMAN	AP-2 complex subunit alpha-2	-0.418777	-4.75878	4.76951	0.00725564
SEC31A	O94979	O94979	SC31A_HUMAN	Protein transport protein Sec31A	0.032242	0.312723	0.121598	0.903747
CLSTN1	O94985	O94985	CSTN1_HUMAN	Calsyntenin-1	-0.0574013	-0.240518	0.091026	0.926146
FAM13A	O94988	O94988	FA13A_HUMAN	Protein FAM13A	-0.891949	-4.9841	5.10498	0.00482667
HEXIM1	O94992	O94992	HEXI1_HUMAN	Protein HEXIM1	0.191862	1.377	0.757838	0.506199
TJP3	O95049	O95049	ZO3_HUMAN	Tight junction protein ZO-3	-1.03431	-6.00235	6.66341	0.000703518
RPP14	O95059	O95059	RPP14_HUMAN	Ribonuclease P protein subunit p14	0.241786	1.76178	1.07458	0.37561
YIF1A	O95070	O95070	YIF1A_HUMAN	Protein YIF1A	-0.33748	-1.72008	1.0381	0.388098
UBR5	O95071	O95071	UBR5_HUMAN	E3 ubiquitin-protein ligase UBR5	0.142043	2.02454	1.3163	0.299075
AGFG2	O95081	O95081	AGFG2_HUMAN	Arf-GAP domain and FG repeat-containing protein 2	-0.631834	-3.20847	2.63254	0.0856469
SCAF4	O95104	O95104	SCAF4_HUMAN	SR-related and CTD-associated factor 4	-0.0830701	-0.60275	0.260112	0.796006
NDUFB6	O95139	O95139	NDUB6_HUMAN	NADH dehydrogenase [ubiquinone] 1 beta subcomplex subunit 6	-0.321766	-1.07186	0.539209	0.615487
MFN2	O95140	O95140	MFN2_HUMAN	Mitofusin-2	0.135952	1.38712	0.765588	0.502861
SNUPN	O95149	O95149	SPN1_HUMAN	Snurportin-1	-0.508284	-3.12824	2.53294	0.0941647
UBE4B	O95155	O95155	UBE4B_HUMAN	Ubiquitin conjugation factor E4 B	0.248368	1.90162	1.20073	0.334231
ZFPL1	O95159	O95159	ZFPL1_HUMAN	Zinc finger protein-like 1	0.220437	1.91051	1.20894	0.33145
ELP1	O95163	O95163	ELP1_HUMAN	Elongator complex protein 1	-0.234611	-2.56972	1.87922	0.178207
NDUFA3	O95167	O95167	NDUA3_HUMAN	NADH dehydrogenase [ubiquinone] 1 alpha subcomplex subunit 3	-0.389039	-2.69239	2.01654	0.157143
NDUFB4	O95168	O95168	NDUB4_HUMAN	NADH dehydrogenase [ubiquinone] 1 beta subcomplex subunit 4	-0.554013	-4.59882	4.53422	0.00973244
NDUFB8	O95169	O95169	NDUB8_HUMAN	NADH dehydrogenase [ubiquinone] 1 beta subcomplex subunit 8, mitochondrial	-0.472335	-3.44017	2.9274	0.0628675
NDUFB2	O95178	O95178	NDUB2_HUMAN	NADH dehydrogenase [ubiquinone] 1 beta subcomplex subunit 2, mitochondrial	-0.166705	-0.745679	0.337854	0.741581
NDUFA7	O95182	O95182	NDUA7_HUMAN	NADH dehydrogenase [ubiquinone] 1 alpha subcomplex subunit 7	-0.257029	-2.03237	1.32381	0.297154
VAMP5	O95183	O95183	VAMP5_HUMAN	Vesicle-associated membrane protein 5	0.12414	0.377319	0.150253	0.880781
RTN3	O95197	O95197	RTN3_HUMAN	Reticulon-3	-0.0195223	-0.141176	0.0514412	0.95647
LETM1	O95202	O95202	LETM1_HUMAN	Mitochondrial proton/calcium exchanger protein	0.691538	3.29681	2.74371	0.0763238
EPN2	O95208	O95208	EPN2_HUMAN	Epsin-2	-0.182211	-1.06473	0.534448	0.618961
STBD1	O95210	O95210	STBD1_HUMAN	Starch-binding domain-containing protein 1	-0.844627	-3.51859	3.02952	0.0563835
ZRANB2	O95218	O95218	ZRAB2_HUMAN	Zinc finger Ran-binding domain-containing protein 2	-0.180039	-1.69673	1.01788	0.395988
SNX4	O95219	O95219	SNX4_HUMAN	Sorting nexin-4	-0.135153	-0.935779	0.451138	0.66671
LUC7L3	O95232	O95232	LC7L3_HUMAN	Luc7-like protein 3	-0.0954187	-0.694897	0.309506	0.762619
KIF20A	O95235	O95235	KI20A_HUMAN	Kinesin-like protein KIF20A	0.779774	3.33126	2.78749	0.0726628
APOL3	O95236	O95236	APOL3_HUMAN	Apolipoprotein L3	-0.773607	-2.48824	1.7901	0.193894
KIF4A	O95239	O95239;Q2VIQ3	KIF4A_HUMAN	Chromosome-associated kinesin KIF4A	1.3908	4.69453	4.67469	0.00827788
MBD4	O95243	O95243	MBD4_HUMAN	Methyl-CpG-binding domain protein 4	0.232762	2.12416	1.41313	0.274032
SBF1	O95248	O95248	MTMR5_HUMAN	Myotubularin-related protein 5	-0.528233	-4.01854	3.70521	0.0262273
GOSR1	O95249	O95249	GOSR1_HUMAN	Golgi SNAP receptor complex member 1	-0.443766	-2.76977	2.10502	0.144522
KAT7	O95251	O95251	KAT7_HUMAN	Histone acetyltransferase KAT7	-0.246232	-2.07597	1.36594	0.28576
ATE1	O95260	O95260	ATE1_HUMAN	Arginyl-tRNA--protein transferase 1	-0.364643	-2.93266	2.2959	0.119853
VAPB	O95292	O95292	VAPB_HUMAN	Vesicle-associated membrane protein-associated protein B/C	0.127646	1.25989	0.670481	0.545599
RASAL1	O95294	O95294	RASL1_HUMAN	RasGAP-activating-like protein 1	-0.703293	-3.14635	2.5553	0.0923131
SNAPIN	O95295	O95295	SNAPN_HUMAN	SNARE-associated protein Snapin	-0.218566	-2.97526	2.34682	0.11368
MPZL1	O95297	O95297	MPZL1_HUMAN	Myelin protein zero-like protein 1	0.410089	2.28583	1.57613	0.23759
NDUFC2	O95298	O95298	NDUC2_HUMAN	NADH dehydrogenase [ubiquinone] 1 subunit C2	-0.37539	-3.36677	2.83286	0.0691675
NDUFA10	O95299	O95299	NDUAA_HUMAN	NADH dehydrogenase [ubiquinone] 1 alpha subcomplex subunit 10, mitochondrial	-0.358144	-3.04605	2.43231	0.104365
FKBP9	O95302	O95302	FKBP9_HUMAN	Peptidyl-prolyl cis-trans isomerase FKBP9	0.40861	2.50978	1.81349	0.189444
CELF2	O95319	O95319	CELF2_HUMAN	CUGBP Elav-like family member 2	-0.565338	-2.05741	1.34794	0.290594
PGLS	O95336	O95336	6PGL_HUMAN	6-phosphogluconolactonase	-0.118359	-0.760699	0.346392	0.735952
PAPSS2	O95340	O95340	PAPS2_HUMAN	Bifunctional 3'-phosphoadenosine 5'-phosphosulfate synthase 2	-0.0764899	-0.326193	0.127471	0.89884
SMC2	O95347	O95347	SMC2_HUMAN	Structural maintenance of chromosomes protein 2	0.831955	3.28421	2.72776	0.0776034
ATG7	O95352	O95352	ATG7_HUMAN	Ubiquitin-like modifier-activating enzyme ATG7	-0.503657	-4.25881	4.04335	0.0175633
TACC2	O95359	O95359	TACC2_HUMAN	Transforming acidic coiled-coil-containing protein 2	-0.268704	-1.71304	1.03198	0.390105
FARS2	O95363	O95363	SYFM_HUMAN	Phenylalanine--tRNA ligase, mitochondrial	-0.0116636	-0.0882581	0.0315058	0.971507
LYPLA2	O95372	O95372	LYPA2_HUMAN	Acyl-protein thioesterase 2	0.162602	1.05651	0.528981	0.621373
IPO7	O95373	O95373	IPO7_HUMAN	Importin-7	0.0423118	0.407505	0.164071	0.867727
ARIH2	O95376	O95376	ARI2_HUMAN	E3 ubiquitin-protein ligase ARIH2	-0.115214	-0.811196	0.375617	0.715461
TNFAIP8	O95379	O95379	TFIP8_HUMAN	Tumor necrosis factor alpha-induced protein 8	-0.945925	-3.4834	2.98356	0.0588953
MAP3K6	O95382	O95382	M3K6_HUMAN	Mitogen-activated protein kinase kinase kinase 6	-0.416812	-2.1457	1.43443	0.268593
SLU7	O95391	O95391	SLU7_HUMAN	Pre-mRNA-splicing factor SLU7	0.00756377	0.048238	0.0169519	0.985254
PGM3	O95394	O95394	AGM1_HUMAN	Phosphoacetylglucosamine mutase	0.0245822	0.164473	0.0604699	0.949063
MOCS3	O95396	O95396	MOCS3_HUMAN	Adenylyltransferase and sulfurtransferase MOCS3	-0.203059	-1.96654	1.26123	0.314677
CD2BP2	O95400	O95400	CD2B2_HUMAN	CD2 antigen cytoplasmic tail-binding protein 2	-0.0114478	-0.0810483	0.0288508	0.973411
MED26	O95402	O95402	MED26_HUMAN	Mediator of RNA polymerase II transcription subunit 26	0.186681	1.86901	1.17079	0.343289
SVIL	O95425	O95425	SVIL_HUMAN	Supervillin	0.0934063	0.569582	0.242975	0.806945
PIGN	O95427	O95427	PIGN_HUMAN	GPI ethanolamine phosphate transferase 1	-0.265091	-2.09642	1.38588	0.280992
PAPLN	O95428	O95428	PPN_HUMAN	Papilin	-0.667229	-3.78832	3.38904	0.0379093
BAG4	O95429	O95429	BAG4_HUMAN	BAG family molecular chaperone regulator 4	-0.211895	-1.58955	0.927233	0.430146
AHSA1	O95433	O95433	AHSA1_HUMAN	Activator of 90 kDa heat shock protein ATPase homolog 1	-0.149707	-1.05538	0.52823	0.621932
SLC34A2	O95436	O95436	NPT2B_HUMAN	Sodium-dependent phosphate transport protein 2B	-0.673516	-2.55106	1.85866	0.182003
PARN	O95453	O95453	PARN_HUMAN	Poly(A)-specific ribonuclease PARN	0.00676753	0.0645767	0.0228397	0.979469
PSMG1	O95456	O95456	PSMG1_HUMAN	Proteasome assembly chaperone 1	0.0350005	0.23437	0.0884934	0.927576
FMNL1	O95466	O95466	FMNL1_HUMAN	Formin-like protein 1	-0.415761	-1.79267	1.10196	0.365939
SGPL1	O95470	O95470	SGPL1_HUMAN	Sphingosine-1-phosphate lyase 1	0.307625	1.57128	0.912127	0.435996
CTDNEP1	O95476	O95476	CNEP1_HUMAN	CTD nuclear envelope phosphatase 1	-0.168118	-1.53328	0.881037	0.449579
NSA2	O95478	O95478	NSA2_HUMAN	Ribosome biogenesis protein NSA2 homolog	0.00303175	0.0160594	0.00557247	0.993236
H6PD	O95479	O95479	G6PE_HUMAN	GDH/6PGL endoplasmic bifunctional protein	-0.658511	-4.34941	4.17282	0.014894
SEC24A	O95486	O95486	SC24A_HUMAN	Protein transport protein Sec24A	0.00389462	0.0381316	0.0133471	0.987873
SEC24B	O95487	O95487	SC24B_HUMAN	Protein transport protein Sec24B	-0.188261	-2.3436	1.6361	0.224172
ADGRL2	O95490	O95490	AGRL2_HUMAN	Adhesion G protein-coupled receptor L2	-0.256637	-1.4818	0.839622	0.468641
SLC2A10	O95528	O95528	GTR10_HUMAN	Solute carrier family 2, facilitated glucose transporter member 10	0.464826	2.24947	1.53885	0.245515
TDP2	O95551	O95551	TYDP2_HUMAN	Tyrosyl-DNA phosphodiesterase 2	-0.271217	-1.53103	0.879216	0.449784
SFT2D2	O95562	O95562	SFT2B_HUMAN	Vesicle transport protein SFT2B	0.662177	2.48029	1.78149	0.19562
MPC2	O95563	O95563	MPC2_HUMAN	Mitochondrial pyruvate carrier 2	-0.206952	-1.00148	0.492929	0.642669
ETHE1	O95571	O95571	ETHE1_HUMAN	Persulfide dioxygenase ETHE1, mitochondrial	0.0769529	0.469056	0.193096	0.846346
ACSL3	O95573	O95573	ACSL3_HUMAN	Fatty acid CoA ligase Acsl3	0.11319	1.23261	0.650748	0.554751
POLR1A	O95602	O95602	RPA1_HUMAN	DNA-directed RNA polymerase I subunit RPA1	-0.0195019	-0.237518	0.0897888	0.92696
PCNT	O95613	O95613	PCNT_HUMAN	Pericentrin	-0.0109623	-0.0970543	0.0347647	0.968456
YEATS4	O95619	O95619	YETS4_HUMAN	YEATS domain-containing protein 4	-0.168549	-0.899933	0.428909	0.680829
ZBTB11	O95625	O95625	ZBT11_HUMAN	Zinc finger and BTB domain-containing protein 11	0.0180706	0.153572	0.0562257	0.951516
CNOT4	O95628	O95628	CNOT4_HUMAN	CCR4-NOT transcription complex subunit 4	0.130055	1.3864	0.765038	0.503072
STAMBP	O95630	O95630	STABP_HUMAN	STAM-binding protein	-0.140622	-1.34767	0.735562	0.516551
NTN1	O95631	O95631	NET1_HUMAN	Netrin-1	-0.369311	-1.93106	1.22801	0.324745
CPSF4	O95639	O95639	CPSF4_HUMAN	Cleavage and polyadenylation specificity factor subunit 4	-0.121502	-0.809315	0.374514	0.71654
NFATC1	O95644	O95644	NFAC1_HUMAN	Nuclear factor of activated T-cells, cytoplasmic 1	-0.147526	-1.24257	0.657928	0.551547
ASMTL	O95671	O95671	ASML_HUMAN	Probable bifunctional dTTP/UTP pyrophosphatase/methyltransferase protein	-0.537569	-2.63344	1.95009	0.167499
CDS2	O95674	O95674	CDS2_HUMAN	Phosphatidate cytidylyltransferase 2	-0.382702	-2.63342	1.95006	0.167422
EYA4	O95677	O95677	EYA4_HUMAN	Eyes absent homolog 4	-0.767203	-2.20662	1.49537	0.254812
CEP43	O95684	O95684	CEP43_HUMAN	Centrosomal protein 43	-0.223121	-2.36957	1.66335	0.218306
PPP1R3D	O95685	O95685	PPR3D_HUMAN	Protein phosphatase 1 regulatory subunit 3D	0.209905	0.959344	0.465972	0.658894
BRD1	O95696	O95696	BRD1_HUMAN	Bromodomain-containing protein 1	-0.485266	-3.47068	2.967	0.0599234
POP4	O95707	O95707	RPP29_HUMAN	Ribonuclease P protein subunit p29	0.225505	1.23724	0.65408	0.553815
HERC2	O95714	O95714	HERC2_HUMAN	E3 ubiquitin-protein ligase HERC2	0.0651598	1.00649	0.496172	0.641054
RAB3D	O95716	P20337;O95716;Q96E17	RAB3D_HUMAN	Ras-related protein Rab-3D	0.0235513	0.142283	0.0518667	0.956242
SNAP29	O95721	O95721	SNP29_HUMAN	Synaptosomal-associated protein 29	-0.234156	-1.70443	1.02453	0.393701
OXSR1	O95747	O95747	OXSR1_HUMAN	Serine/threonine-protein kinase OSR1	-0.181106	-1.39965	0.775232	0.499351
GGPS1	O95749	O95749	GGPPS_HUMAN	Geranylgeranyl pyrophosphate synthase	0.121197	0.956869	0.464405	0.659625
RAB36	O95755	O95755	RAB36_HUMAN	Ras-related protein Rab-36	-0.859556	-5.24752	5.50238	0.00296703
HSPA4L	O95757	O95757	HS74L_HUMAN	Heat shock 70 kDa protein 4L	-1.82804	-5.89294	6.49361	0.000789238
PTBP3	O95758	O95758	PTBP3_HUMAN	Polypyrimidine tract-binding protein 3	0.0700507	0.665923	0.293691	0.772893
TBC1D8	O95759	O95759	TBCD8_HUMAN	TBC1 domain family member 8	-0.792509	-3.41496	2.89481	0.0646933
STARD3NL	O95772	O95772	STR3N_HUMAN	STARD3 N-terminal-like protein	0.0374468	0.231989	0.0875158	0.928571
LSM8	O95777	O95777	LSM8_HUMAN	U6 snRNA-associated Sm-like protein LSm8	-0.210866	-1.90683	1.20553	0.332512
AP2A1	O95782	O95782	AP2A1_HUMAN	AP-2 complex subunit alpha-1	-0.138896	-1.31275	0.709386	0.528055
WIZ	O95785	O95785	WIZ_HUMAN	Protein Wiz	0.212969	2.10629	1.39556	0.278465
RIGI	O95786	O95786	RIGI_HUMAN	Antiviral innate immune response receptor RIG-I	0.0331924	0.183256	0.0678621	0.942722
STAU1	O95793	O95793	STAU1_HUMAN	Double-stranded RNA-binding protein Staufen homolog 1	0.416472	2.85656	2.20596	0.131746
TTC4	O95801	O95801	TTC4_HUMAN	Tetratricopeptide repeat protein 4	0.115872	0.979575	0.478846	0.650694
CAVIN2	O95810	O95810	CAVN2_HUMAN	Caveolae-associated protein 2	-0.547365	-1.36248	0.746774	0.510485
BAG2	O95816	O95816	BAG2_HUMAN	BAG family molecular chaperone regulator 2	0.0715519	0.260764	0.0994443	0.920047
BAG3	O95817	O95817	BAG3_HUMAN	BAG family molecular chaperone regulator 3	-0.126322	-1.19097	0.621077	0.570998
MAP4K4	O95819	O95819	M4K4_HUMAN	Mitogen-activated protein kinase kinase kinase kinase 4	0.34701	3.19802	2.61948	0.0866838
MLYCD	O95822	O95822	DCMC_HUMAN	Malonyl-CoA decarboxylase, mitochondrial	-0.217715	-1.90357	1.20253	0.33375
CRYZL1	O95825	O95825	QORL1_HUMAN	Quinone oxidoreductase-like protein 1	-0.542665	-5.63227	6.09083	0.00124232
AIFM1	O95831	O95831	AIFM1_HUMAN	Apoptosis-inducing factor 1, mitochondrial	0.269326	1.25012	0.663388	0.547757
CLDN1	O95832	O95832	CLD1_HUMAN	Claudin-1	-1.94024	-6.79415	7.89965	3.6036e-05
CLIC3	O95833	O95833	CLIC3_HUMAN	Chloride intracellular channel protein 3	-0.504562	-1.6707	0.99555	0.404037
EML2	O95834	O95834	EMAL2_HUMAN	Echinoderm microtubule-associated protein-like 2	-1.14873	-5.43157	5.78284	0.002
NUDT14	O95848	O95848	NUD14_HUMAN	Uridine diphosphate glucose pyrophosphatase NUDT14	-0.516241	-2.51876	1.82329	0.188059
TSPAN15	O95858	O95858	TSN15_HUMAN	Tetraspanin-15	-1.14996	-5.66964	6.1484	0.00113684
BPNT1	O95861	O95861	BPNT1_HUMAN	3'(2'),5'-bisphosphate nucleotidase 1	-0.0832562	-0.417337	0.16863	0.86575
DDAH2	O95865	O95865	DDAH2_HUMAN	N(G),N(G)-dimethylarginine dimethylaminohydrolase 2	0.0845087	0.411471	0.165906	0.866883
ABHD16A	O95870	O95870	ABHGA_HUMAN	Phosphatidylserine lipase ABHD16A	0.110406	0.825161	0.38384	0.709904
C6orf47	O95873	O95873	CF047_HUMAN	Uncharacterized protein C6orf47	0.0151163	0.124254	0.0449803	0.960935
TXNDC12	O95881	O95881	TXD12_HUMAN	Thioredoxin domain-containing protein 12	0.197018	1.50436	0.857677	0.459071
TRUB2	O95900	O95900	TRUB2_HUMAN	Pseudouridylate synthase TRUB2, mitochondrial	0.0952354	0.615826	0.266961	0.790632
ECD	O95905	O95905	ECD_HUMAN	Protein ecdysoneless homolog	-0.14959	-0.906005	0.432646	0.679266
SYF2	O95926	O95926	SYF2_HUMAN	Pre-mRNA-splicing factor SYF2	-0.147508	-1.01491	0.501642	0.638144
CBX7	O95931	O95931	CBX7_HUMAN	Chromobox protein homolog 7	-1.12618	-5.51333	5.90806	0.00163291
EFEMP2	O95967	O95967	FBLN4_HUMAN	EGF-containing fibulin-like extracellular matrix protein 2	-0.338368	-0.991935	0.486775	0.646475
SCGB1D2	O95969	O95969	SG1D2_HUMAN	Secretoglobin family 1D member 2	0.107263	0.442455	0.180411	0.855085
MBD3	O95983	O95983	MBD3_HUMAN	Methyl-CpG-binding domain protein 3	0.330033	2.14283	1.43159	0.269311
TOP3B	O95985	O95985	TOP3B_HUMAN	DNA topoisomerase 3-beta-1	-0.368029	-3.45974	2.95278	0.0609952
NUDT3	O95989	O95989	NUDT3_HUMAN	Diphosphoinositol polyphosphate phosphohydrolase 1	-0.0947254	-0.715049	0.320659	0.755527
FAM107A	O95990	O95990	F107A_HUMAN	Actin-associated protein FAM107A	-0.690978	-2.78876	2.12696	0.141711
AGR2	O95994	O95994	AGR2_HUMAN	Anterior gradient protein 2 homolog	-2.81193	-5.28509	5.55946	0.00264804
GAS8	O95995	O95995	DRC4_HUMAN	Dynein regulatory complex subunit 4	-1.84625	-3.91769	3.56571	0.0310151
BCL10	O95999	O95999	BCL10_HUMAN	B-cell lymphoma/leukemia 10	0.0565293	0.544069	0.230024	0.816619
NDUFB10	O96000	O96000	NDUBA_HUMAN	NADH dehydrogenase [ubiquinone] 1 beta subcomplex subunit 10	-0.40743	-2.94711	2.31313	0.117578
CLPTM1	O96005	O96005	CLPT1_HUMAN	Putative lipid scramblase CLPTM1	0.195102	1.56924	0.910453	0.436593
ZBED1	O96006	O96006	ZBED1_HUMAN	E3 SUMO-protein ligase ZBED1	-0.305666	-1.79675	1.10559	0.364805
MOCS2	O96007	O96007	MOC2B_HUMAN	Molybdopterin synthase catalytic subunit	-0.348263	-2.47	1.77038	0.197989
TOMM40	O96008	O96008	TOM40_HUMAN	Mitochondrial import receptor subunit TOM40 homolog	0.478369	2.92772	2.29002	0.120219
PEX11B	O96011	O96011	PX11B_HUMAN	Peroxisomal membrane protein 11B	0.342583	3.47068	2.96699	0.0598757
PAK4	O96013	O96013	PAK4_HUMAN	Serine/threonine-protein kinase PAK 4	-0.0376117	-0.210135	0.0786173	0.934993
DNAL4	O96015	O96015	DNAL4_HUMAN	Dynein axonemal light chain 4	-2.10127	-6.6172	7.62276	0.000128
CHEK2	O96017	O96017	CHK2_HUMAN	Serine/threonine-protein kinase Chk2	0.251998	1.43986	0.806489	0.485037
ACTL6A	O96019	O96019	ACL6A_HUMAN	Actin-like protein 6A	0.0872677	0.742825	0.336239	0.742815
MT-CYB	P00156	P00156	CYB_HUMAN	Cytochrome b	-0.426382	-1.73391	1.05014	0.383942
CYB5A	P00167	P00167	CYB5_HUMAN	Cytochrome b5	-0.340644	-1.69594	1.0172	0.396197
ADH1B	P00325	P00325;P08319	ADH1B_HUMAN	All-trans-retinol dehydrogenase [NAD(+)] ADH1B	-0.0943655	-0.261358	0.0996929	0.919904
ADH1C	P00326	P00326	ADH1G_HUMAN	Alcohol dehydrogenase 1C	-0.616961	-1.5671	0.908687	0.437135
LDHA	P00338	P00338	LDHA_HUMAN	L-lactate dehydrogenase A chain	-0.21201	-1.2249	0.645215	0.557588
ALDH1A1	P00352	P00352	AL1A1_HUMAN	Aldehyde dehydrogenase 1A1	-2.19646	-7.23667	8.59183	5.06329e-05
DHFR	P00374	P00374	DYR_HUMAN	Dihydrofolate reductase	0.98977	2.79722	2.13676	0.140639
CYB5R3	P00387	P00387	NB5R3_HUMAN	NADH-cytochrome b5 reductase 3	-0.507135	-3.21977	2.64666	0.0846296
GSR	P00390	P00390	GSHR_HUMAN	Glutathione reductase, mitochondrial	-0.586713	-3.15607	2.56734	0.0914493
MT-CO1	P00395	P00395	COX1_HUMAN	Cytochrome c oxidase subunit 1	-0.368732	-1.97425	1.26849	0.313395
MT-CO2	P00403	P00403	COX2_HUMAN	Cytochrome c oxidase subunit 2	-0.553601	-2.39282	1.68789	0.214
MT-CO3	P00414	P00414	COX3_HUMAN	Cytochrome c oxidase subunit 3	-0.106883	-0.507659	0.211885	0.8308
SOD1	P00441	P00441	SODC_HUMAN	Superoxide dismutase [Cu-Zn]	-0.382537	-2.35899	1.65222	0.220704
CP	P00450	P00450	CERU_HUMAN	Ceruloplasmin	0.0111428	0.0452896	0.0158973	0.98652
F13A1	P00488	P00488	F13A_HUMAN	Coagulation factor XIII A chain	-0.134227	-0.41833	0.169093	0.865301
PNP	P00491	P00491	PNPH_HUMAN	Purine nucleoside phosphorylase	0.547789	1.8552	1.15822	0.347442
HPRT1	P00492	P00492	HPRT_HUMAN	Hypoxanthine-guanine phosphoribosyltransferase	-0.277231	-1.38616	0.764853	0.502979
GOT2	P00505	P00505	AATM_HUMAN	Aspartate aminotransferase, mitochondrial	-0.208408	-1.27953	0.684832	0.539598
ABL1	P00519	P00519	ABL1_HUMAN	Tyrosine-protein kinase ABL1	-0.40035	-3.95209	3.61314	0.0294276
EGFR	P00533	P00533	EGFR_HUMAN	Epidermal growth factor receptor	-0.448473	-3.28997	2.73504	0.0769672
PGK1	P00558	P00558	PGK1_HUMAN	Phosphoglycerate kinase 1	-0.202832	-1.49305	0.848607	0.464061
AK1	P00568	P00568	KAD1_HUMAN	Adenylate kinase isoenzyme 1	-1.9459	-8.87905	11.125	0
F2	P00734	P00734	THRB_HUMAN	Prothrombin	0.13094	0.543945	0.229961	0.816564
C1R	P00736	P00736	C1R_HUMAN	Complement C1r subcomponent	0.0823187	0.428616	0.173897	0.860677
HP	P00738	P00738	HPT_HUMAN	Haptoglobin	0.169801	0.403103	0.162039	0.869666
F9	P00740	P00740	FA9_HUMAN	Coagulation factor IX	0.133802	0.413581	0.166885	0.866675
CFD	P00746	P00746	CFAD_HUMAN	Complement factor D	-0.468579	-1.83353	1.13858	0.35361
F12	P00748	P00748	FA12_HUMAN	Coagulation factor XII	-0.0449824	-0.156523	0.0573715	0.95049
CFB	P00751	P00751	CFAB_HUMAN	Complement factor B	0.194731	0.872391	0.412103	0.69104
ADA	P00813	P00813	ADA_HUMAN	Adenosine deaminase	-0.0446421	-0.199976	0.0745277	0.938381
MT-ATP6	P00846	P00846	ATP6_HUMAN	ATP synthase subunit a	-0.437127	-1.88906	1.18916	0.337388
CA1	P00915	P00915	CAH1_HUMAN	Carbonic anhydrase 1	0.585885	1.24819	0.661992	0.548864
CA2	P00918	P00918	CAH2_HUMAN	Carbonic anhydrase 2	-0.1271	-0.445541	0.181872	0.854059
ASS1	P00966	P00966	ASSY_HUMAN	Argininosuccinate synthase	-0.472411	-2.16393	1.45256	0.264316
OAS1	P00973	P00973	OAS1_HUMAN	2'-5'-oligoadenylate synthase 1	-0.372009	-1.7914	1.10082	0.366458
SERPINC1	P01008	P01008	ANT3_HUMAN	Antithrombin-III	-0.317913	-1.62328	0.955385	0.418894
SERPINA1	P01009	P01009	A1AT_HUMAN	Alpha-1-antitrypsin	-0.232263	-0.785355	0.360562	0.726664
SERPINA3	P01011	P01011	AACT_HUMAN	Alpha-1-antichymotrypsin	0.0621897	0.189128	0.0701939	0.941779
AGT	P01019	P01019	ANGT_HUMAN	Angiotensinogen	-0.36635	-1.34886	0.736458	0.51629
A2M	P01023	P20742;P01023	A2MG_HUMAN	Alpha-2-macroglobulin	-0.0487462	-0.162833	0.0598293	0.949143
C3	P01024	P01024	CO3_HUMAN	Complement C3	-0.0092245	-0.0357225	0.012492	0.988774
C5	P01031	P01031	CO5_HUMAN	Complement C5	-0.0575589	-0.22498	0.0846469	0.930359
TIMP1	P01033	P01033	TIMP1_HUMAN	Metalloproteinase inhibitor 1	0.94579	3.8728	3.50411	0.0334447
CST3	P01034	P01034	CYTC_HUMAN	Cystatin-C	0.300968	1.82405	1.13005	0.356376
CSTA	P01040	P01040	CYTA_HUMAN	Cystatin-A	0.84733	2.50517	1.80848	0.189801
KNG1	P01042	P01042	KNG1_HUMAN	Kininogen-1	-0.243014	-0.941714	0.454857	0.663984
NRAS	P01111	P01111;P01112	RASN_HUMAN	GTPase NRas	0.156878	1.36911	0.751823	0.507957
HRAS	P01112	P01112	RASH_HUMAN	GTPase HRas	-0.543999	-1.63396	0.96437	0.414374
KRAS	P01116	P01116	RASK_HUMAN	GTPase KRas	0.0519303	0.353679	0.139622	0.888972
TGFB1	P01137	P01137	TGFB1_HUMAN	Transforming growth factor beta-1 proprotein	0.116631	0.474462	0.1957	0.844951
JCHAIN	P01591	P01591	IGJ_HUMAN	Immunoglobulin J chain	-0.304479	-0.718796	0.322747	0.754105
IGKV1-39;IGKV1D-39	P01597;P04432	P04432;P01597;A0A0C4DH73;A0A0C4DH72;P01611	KV139_HUMAN;KVD39_HUMAN	Immunoglobulin kappa variable 1-39	-0.266832	-0.884122	0.419232	0.68683
IGKV1-5	P01602	P01602	KV105_HUMAN	Immunoglobulin kappa variable 1-5	-0.192665	-0.507011	0.211566	0.831012
IGKV3-20	P01619	P01619	KV320_HUMAN	Immunoglobulin kappa variable 3-20	-0.254875	-0.669674	0.295724	0.771524
IGLV1-47	P01700	P01700	LV147_HUMAN	Immunoglobulin lambda variable 1-47	-0.324264	-1.11866	0.570841	0.598947
IGLV1-40	P01703	P01703	LV140_HUMAN	Immunoglobulin lambda variable 1-40	-0.202585	-0.637796	0.278588	0.782276
IGLV3-19	P01714	P01714	LV319_HUMAN	Immunoglobulin lambda variable 3-19	-0.955066	-2.21333	1.50215	0.25372
IGLV3-25	P01717	P01717	LV325_HUMAN	Immunoglobulin lambda variable 3-25	-0.24409	-0.668519	0.295098	0.771928
CD8A	P01732	P01732	CD8A_HUMAN	T-cell surface glycoprotein CD8 alpha chain	-0.832146	-3.38603	2.85756	0.0674273
IGHV1-69	P01742	P01742	HV169_HUMAN	Immunoglobulin heavy variable 1-69	-0.0777389	-0.201773	0.0752488	0.938448
IGHV1-46	P01743	P01743	HV146_HUMAN	Immunoglobulin heavy variable 1-46	-0.188155	-0.814904	0.377794	0.713636
IGHV3-30;IGHV3-30-5	P01768;P0DP03	P01768;A0A0J9YY99;P01772;P0DP03	HV330_HUMAN;HVC05_HUMAN	Immunoglobulin heavy variable 3-30	-0.311969	-1.02254	0.506618	0.636143
IGHV3-7	P01780	P01780	HV307_HUMAN	Immunoglobulin heavy variable 3-7	-0.435366	-1.39903	0.774753	0.499496
PIGR	P01833	P01833	PIGR_HUMAN	Polymeric immunoglobulin receptor	-0.00971264	-0.018163	0.00630764	0.992464
IGKC	P01834	P01834	IGKC_HUMAN	Immunoglobulin kappa constant	-0.368067	-1.01724	0.50316	0.637178
IGHG1	P01857	P01859;P01857	IGHG1_HUMAN	Immunoglobulin heavy constant gamma 1	-0.35118	-0.990315	0.485733	0.646971
IGHG2	P01859	P01859	IGHG2_HUMAN	Immunoglobulin heavy constant gamma 2	-0.365976	-1.11631	0.569236	0.599938
IGHG3	P01860	P01860	IGHG3_HUMAN	Immunoglobulin heavy constant gamma 3	-0.241792	-0.956067	0.463899	0.659827
IGHG4	P01861	P01861	IGHG4_HUMAN	Immunoglobulin heavy constant gamma 4	-0.250638	-0.714316	0.320251	0.755434
IGHM	P01871	P01871	IGHM_HUMAN	Immunoglobulin heavy constant mu	0.0867951	0.242547	0.0918644	0.925679
IGHA1	P01876	P01877;P01876	IGHA1_HUMAN	Immunoglobulin heavy constant alpha 1	-0.234015	-0.441879	0.180139	0.855354
IGHA2	P01877	P01877	IGHA2_HUMAN	Immunoglobulin heavy constant alpha 2	-0.331625	-0.769425	0.351386	0.733194
HLA-B	P01889	P01889;P04439	HLAB_HUMAN	HLA class I histocompatibility antigen, B alpha chain	0.139085	0.369769	0.14684	0.883561
HLA-H	P01893	P01893	HLAH_HUMAN	Putative HLA class I histocompatibility antigen, alpha chain H	0.0374412	0.100489	0.0360432	0.967806
HLA-DRA	P01903	P01903;P01906	DRA_HUMAN	HLA class II histocompatibility antigen, DR alpha chain	-0.919329	-2.1268	1.41573	0.273563
HLA-DQA1	P01909	P01909	DQA1_HUMAN	HLA class II histocompatibility antigen, DQ alpha 1 chain	-0.825911	-1.84521	1.14915	0.350269
HLA-DRB1	P01911	P01911	DRB1_HUMAN	HLA class II histocompatibility antigen, DRB1 beta chain	-0.74008	-1.97456	1.26878	0.313358
HLA-DQB1	P01920	P01920	DQB1_HUMAN	HLA class II histocompatibility antigen, DQ beta 1 chain	-0.792515	-1.74538	1.06017	0.38081
HBD	P02042	P02042	HBD_HUMAN	Hemoglobin subunit delta	0.629847	1.07959	0.544389	0.612058
MB	P02144	P02144	MYG_HUMAN	Myoglobin	-1.25344	-3.54095	3.05884	0.0547563
COL1A1	P02452	P02452	CO1A1_HUMAN	Collagen alpha-1(I) chain	-1.21057	-2.50852	1.81212	0.189561
COL3A1	P02461	P02461	CO3A1_HUMAN	Collagen alpha-1(III) chain	-1.07821	-2.37649	1.67064	0.217223
COL4A1	P02462	P02462;P29400	CO4A1_HUMAN	Collagen alpha-1(IV) chain	-0.681057	-3.11179	2.51268	0.0963701
CRYAB	P02511	P02511	CRYAB_HUMAN	Alpha-crystallin B chain	-0.465317	-1.67129	0.996052	0.404045
LMNA	P02545	P02545	LMNA_HUMAN	Prelamin-A/C	-1.12066	-5.14513	5.34731	0.00365482
SPTA1	P02549	P02549	SPTA1_HUMAN	Spectrin alpha chain, erythrocytic 1	0.480365	1.13844	0.584424	0.591546
APOA1	P02647	P02647	APOA1_HUMAN	Apolipoprotein A-I	-0.381808	-1.26233	0.672263	0.544799
APOE	P02649	P02649	APOE_HUMAN	Apolipoprotein E	0.0742892	0.231555	0.0873375	0.928743
APOA2	P02652	P02652	APOA2_HUMAN	Apolipoprotein A-II	-0.344133	-1.43865	0.805537	0.485673
APOC1	P02654	P02654	APOC1_HUMAN	Apolipoprotein C-I	0.70185	1.94091	1.23719	0.322071
APOC3	P02656	P02656	APOC3_HUMAN	Apolipoprotein C-III	-0.0462029	-0.157502	0.057752	0.950501
FGA	P02671	P02671	FIBA_HUMAN	Fibrinogen alpha chain	0.67073	1.60332	0.938683	0.425659
FGB	P02675	P02675	FIBB_HUMAN	Fibrinogen beta chain	0.829425	1.98186	1.27568	0.31127
FGG	P02679	P02679	FIBG_HUMAN	Fibrinogen gamma chain	0.877436	1.87177	1.17332	0.342631
MBP	P02686	P02686	MBP_HUMAN	Myelin basic protein	-0.598233	-3.08841	2.484	0.0993893
SLC4A1	P02730	P02730	B3AT_HUMAN	Band 3 anion transport protein	0.843585	1.4198	0.79083	0.491752
APCS	P02743	P02743	SAMP_HUMAN	Serum amyloid P-component	-0.223734	-0.711575	0.318727	0.75637
C1QA	P02745	P02745	C1QA_HUMAN	Complement C1q subcomponent subunit A	0.0826073	0.305477	0.118461	0.905413
C1QB	P02746	P02746	C1QB_HUMAN	Complement C1q subcomponent subunit B	0.112467	0.492185	0.204299	0.838242
C1QC	P02747	P02747	C1QC_HUMAN	Complement C1q subcomponent subunit C	0.143991	0.456123	0.186902	0.850195
APOH	P02749	P02749	APOH_HUMAN	Beta-2-glycoprotein 1	0.153424	0.498846	0.207556	0.834831
LRG1	P02750	P02750	A2GL_HUMAN	Leucine-rich alpha-2-glycoprotein	-0.369131	-1.15203	0.593819	0.585538
AMBP	P02760	P02760	AMBP_HUMAN	Protein AMBP	-0.691865	-2.91232	2.27174	0.122849
ORM1	P02763	P02763	A1AG1_HUMAN	Alpha-1-acid glycoprotein 1	-0.319834	-0.799435	0.368739	0.72082
AHSG	P02765	P02765	FETUA_HUMAN	Alpha-2-HS-glycoprotein	-0.202876	-0.895086	0.425934	0.682214
TTR	P02766	P02766	TTHY_HUMAN	Transthyretin	-0.398668	-1.84248	1.14668	0.351009
ALB	P02768	P02768	ALBU_HUMAN	Albumin	-0.443441	-1.78857	1.09831	0.36733
GC	P02774	P02774	VTDB_HUMAN	Vitamin D-binding protein	-0.33969	-1.4314	0.79987	0.487699
TFRC	P02786	P02786	TFR1_HUMAN	Transferrin receptor protein 1	1.29482	4.11466	3.83955	0.0226305
TF	P02787	P02787	TRFE_HUMAN	Serotransferrin	-0.327118	-1.26244	0.67234	0.544848
HPX	P02790	P02790	HEMO_HUMAN	Hemopexin	-0.367526	-1.38619	0.764875	0.503081
FTL	P02792	P02792	FRIL_HUMAN	Ferritin light chain	0.159023	0.423343	0.17143	0.863011
FTH1	P02794	P02794	FRIH_HUMAN	Ferritin heavy chain	-0.314554	-1.1543	0.595396	0.584573
ESR1	P03372	P03372	ESR1_HUMAN	Estrogen receptor	-1.23033	-5.74112	6.25869	0.000962963
MT-ND1	P03886	P03886	NU1M_HUMAN	NADH-ubiquinone oxidoreductase chain 1	-0.388537	-2.78927	2.12756	0.141744
MT-ND2	P03891	P03891	NU2M_HUMAN	NADH-ubiquinone oxidoreductase chain 2	-0.43269	-1.93341	1.2302	0.324089
MT-ND3	P03897	P03897	NU3M_HUMAN	NADH-ubiquinone oxidoreductase chain 3	-0.473662	-1.77661	1.08769	0.370968
MT-ND4	P03905	P03905	NU4M_HUMAN	NADH-ubiquinone oxidoreductase chain 4	-0.479112	-3.86827	3.49791	0.0336875
MT-ND5	P03915	P03915	NU5M_HUMAN	NADH-ubiquinone oxidoreductase chain 5	-0.502783	-2.77547	2.1116	0.143889
MT-ND6	P03923	P03923	NU6M_HUMAN	NADH-ubiquinone oxidoreductase chain 6	-0.673726	-4.82926	4.87396	0.0062643
KLKB1	P03952	P03952	KLKB1_HUMAN	Plasma kallikrein	-0.0492758	-0.215375	0.0807381	0.93308
SLPI	P03973	P03973	SLPI_HUMAN	Antileukoproteinase	0.772924	2.18838	1.47702	0.259118
C4BPA	P04003	P04003	C4BPA_HUMAN	C4b-binding protein alpha chain	0.446869	1.25901	0.669847	0.545935
VTN	P04004	P04004	VTNC_HUMAN	Vitronectin	0.18066	0.573765	0.245118	0.805332
CAT	P04040	P04040	CATA_HUMAN	Catalase	-0.701166	-4.41897	4.2729	0.0132628
GBA1	P04062	P04062	GBA1_HUMAN	Lysosomal acid glucosylceramidase	0.108327	0.847422	0.397074	0.701336
FUCA1	P04066	P04066	FUCO_HUMAN	Tissue alpha-L-fucosidase	-0.479497	-2.6631	1.98342	0.162007
ALDOA	P04075	P04075	ALDOA_HUMAN	Fructose-bisphosphate aldolase A	-0.0546682	-0.371467	0.147606	0.883131
CSTB	P04080	P04080	CYTB_HUMAN	Cystatin-B	-0.18152	-0.825123	0.383817	0.709804
ANXA1	P04083	P04083	ANXA1_HUMAN	Annexin A1	-1.06829	-5.32697	5.6232	0.00242735
APOB	P04114	P04114	APOB_HUMAN	Apolipoprotein B-100	0.373241	1.15388	0.595104	0.584735
NR3C1	P04150	P04150	GCR_HUMAN	Glucocorticoid receptor	-0.800674	-3.31571	2.7677	0.0741445
PRNP	P04156	P04156	PRIO_HUMAN	Major prion protein	-0.33633	-2.58161	1.89237	0.175636
SOD2	P04179	P04179	SODM_HUMAN	Superoxide dismutase [Mn], mitochondrial	-0.917767	-3.4391	2.92601	0.0629099
OAT	P04181	P04181	OAT_HUMAN	Ornithine aminotransferase, mitochondrial	0.924069	3.21378	2.63917	0.0852164
HRG	P04196	P04196	HRG_HUMAN	Histidine-rich glycoprotein	-0.122789	-0.58851	0.252713	0.801092
THY1	P04216	P04216	THY1_HUMAN	Thy-1 membrane glycoprotein	0.555217	1.02584	0.508775	0.635006
A1BG	P04217	P04217	A1BG_HUMAN	Alpha-1B-glycoprotein	-0.461426	-1.63271	0.963324	0.414949
CD74	P04233	P04233	HG2A_HUMAN	HLA class II histocompatibility antigen gamma chain	-1.04886	-2.81433	2.15663	0.137615
TUBB4A	P04350	P04350	TBB4A_HUMAN	Tubulin beta-4A chain	0.129474	0.344199	0.135406	0.893104
GAPDH	P04406	P04406	G3P_HUMAN	Glyceraldehyde-3-phosphate dehydrogenase	-0.0449333	-0.276318	0.105993	0.915816
ASL	P04424	P04424	ARLY_HUMAN	Argininosuccinate lyase	-0.340335	-1.55855	0.901664	0.440044
HLA-A	P04439	P04439	HLAA_HUMAN	HLA class I histocompatibility antigen, A alpha chain	0.351065	1.06884	0.537191	0.616994
HLA-DPB1	P04440	P04440	DPB1_HUMAN	HLA class II histocompatibility antigen, DP beta 1 chain	-1.57042	-2.81461	2.15695	0.137618
ERBB2	P04626	P04626	ERBB2_HUMAN	Receptor tyrosine-protein kinase erbB-2	-0.175932	-1.10094	0.558786	0.605395
CAPNS1	P04632	Q96L46;P04632	CPNS1_HUMAN	Calpain small subunit 1	-0.95027	-5.82563	6.38936	0.000825911
HSPB1	P04792	P04792	HSPB1_HUMAN	Heat shock protein beta-1	-0.621051	-3.19766	2.61904	0.0866712
CYBB	P04839	P04839	CY24B_HUMAN	Cytochrome b-245 heavy chain	-0.539384	-1.83062	1.13596	0.354454
RPN1	P04843	P04843	RPN1_HUMAN	Dolichyl-diphosphooligosaccharide--protein glycosyltransferase subunit 1	-0.0749188	-0.788646	0.362468	0.725937
RPN2	P04844	P04844	RPN2_HUMAN	Dolichyl-diphosphooligosaccharide--protein glycosyltransferase subunit 2	-0.237482	-2.75751	2.09091	0.146756
GNAI2	P04899	P04899	GNAI2_HUMAN	Guanine nucleotide-binding protein G(i) subunit alpha-2	-0.536639	-5.32752	5.62403	0.00243429
SLC4A2	P04920	P04920;P48751	B3A2_HUMAN	Anion exchange protein 2	0.00677667	0.0298382	0.0104101	0.990716
ATP1A1	P05023	P05023	AT1A1_HUMAN	Sodium/potassium-transporting ATPase subunit alpha-1	-0.0636168	-0.471583	0.194312	0.845599
ATP1B1	P05026	P05026	AT1B1_HUMAN	Sodium/potassium-transporting ATPase subunit beta-1	-0.646663	-2.95132	2.31816	0.117217
APP	P05067	P05067	A4_HUMAN	Amyloid-beta precursor protein	0.12766	1.06586	0.535203	0.618331
ARG1	P05089	P05089	ARGI1_HUMAN	Arginase-1	0.74293	2.07964	1.36952	0.28503
APOD	P05090	P05090	APOD_HUMAN	Apolipoprotein D	0.192253	0.739794	0.334527	0.744314
ALDH2	P05091	P05091;O94788	ALDH2_HUMAN	Aldehyde dehydrogenase, mitochondrial	-0.742142	-3.3085	2.75854	0.075096
ITGB2	P05107	P05107	ITB2_HUMAN	Integrin beta-2	-0.678961	-2.28601	1.57631	0.237606
S100A8	P05109	P05109	S10A8_HUMAN	Protein S100-A8	0.631686	1.33598	0.726752	0.519611
HMGN1	P05114	P05114	HMGN1_HUMAN	Non-histone chromosomal protein HMG-14	-0.587036	-4.11967	3.84658	0.0225
SLC25A5	P05141	P05141;P12236;P12235;Q9H0C2	ADT2_HUMAN	ADP/ATP translocase 2	0.770336	4.03967	3.73464	0.0254596
SERPINA5	P05154	P05154	IPSP_HUMAN	Plasma serine protease inhibitor	-0.0106534	-0.0427554	0.0149928	0.986781
SERPING1	P05155	P05155	IC1_HUMAN	Plasma protease C1 inhibitor	0.049649	0.200853	0.0748798	0.938539
CFI	P05156	P05156	CFAI_HUMAN	Complement factor I	-0.00742564	-0.0377132	0.0131985	0.98802
ISG15	P05161	P05161	ISG15_HUMAN	Ubiquitin-like protein ISG15	1.07027	2.92291	2.2843	0.121138
MPO	P05164	P05164	PERM_HUMAN	Myeloperoxidase	0.344622	0.940771	0.454266	0.664356
PCCA	P05165	P05165	PCCA_HUMAN	Propionyl-CoA carboxylase alpha chain, mitochondrial	-0.476722	-3.25219	2.68736	0.0807019
PCCB	P05166	P05166	PCCB_HUMAN	Propionyl-CoA carboxylase beta chain, mitochondrial	-0.484151	-3.05866	2.44766	0.10267
ALPL	P05186	P05186	PPBT_HUMAN	Alkaline phosphatase, tissue-nonspecific isozyme	2.17215	4.54925	4.46184	0.0107231
EIF2S1	P05198	P05198	IF2A_HUMAN	Eukaryotic translation initiation factor 2 subunit 1	0.219981	1.98139	1.27523	0.311379
ICAM1	P05362	P05362	ICAM1_HUMAN	Intercellular adhesion molecule 1	0.297288	1.45312	0.816907	0.479988
RPLP1	P05386	P05386	RLA1_HUMAN	Large ribosomal subunit protein P1	-0.207161	-1.88704	1.1873	0.337908
RPLP2	P05387	P05387	RLA2_HUMAN	Large ribosomal subunit protein P2	-0.286246	-2.61987	1.93491	0.169558
RPLP0	P05388	P05388	RLA0_HUMAN	Large ribosomal subunit protein uL10	-0.273437	-2.22758	1.51658	0.250726
JUN	P05412	P05412	JUN_HUMAN	Transcription factor Jun	0.544247	2.58708	1.89843	0.175159
FABP3	P05413	P05413	FABPH_HUMAN	Fatty acid-binding protein, heart	0.231142	0.750225	0.340431	0.73917
POLR3D	P05423	P05423	RPC4_HUMAN	DNA-directed RNA polymerase III subunit RPC4	-0.161955	-1.21383	0.637303	0.562121
SSB	P05455	P05455	LA_HUMAN	Lupus La protein	-0.0775182	-0.609041	0.263401	0.794276
SERPINA7	P05543	P05543	THBG_HUMAN	Thyroxine-binding globulin	-0.294793	-1.1114	0.565894	0.602108
SERPIND1	P05546	P05546	HEP2_HUMAN	Heparin cofactor 2	-0.217367	-0.860333	0.404821	0.696091
ITGB1	P05556	P05556	ITB1_HUMAN	Integrin beta-1	-0.0142063	-0.109659	0.0394728	0.964661
PRKCB	P05771	P05771	KPCB_HUMAN	Protein kinase C beta type	-0.142887	-0.660688	0.290862	0.774752
COL5A2	P05997	P05997	CO5A2_HUMAN	Collagen alpha-2(V) chain	-0.99689	-2.24371	1.53298	0.246676
UROD	P06132	P06132	DCUP_HUMAN	Uroporphyrinogen decarboxylase	-0.0089289	-0.056508	0.0199228	0.982326
INSR	P06213	P06213	INSR_HUMAN	Insulin receptor	-0.449336	-3.91677	3.56445	0.0310204
FYN	P06241	P06241	FYN_HUMAN	Tyrosine-protein kinase Fyn	-0.923281	-3.74498	3.33044	0.0401797
GLA	P06280	P06280	AGAL_HUMAN	Alpha-galactosidase A	-0.550022	-2.84741	2.19524	0.132821
IGKV2-30	P06310	P06310	KV230_HUMAN	Immunoglobulin kappa variable 2-30	-0.217111	-0.906897	0.433196	0.679141
IGKV4-1	P06312	P06312	KV401_HUMAN	Immunoglobulin kappa variable 4-1	-0.380021	-1.13829	0.584318	0.591401
HLA-DOA	P06340	P06340	DOA_HUMAN	HLA class II histocompatibility antigen, DO alpha chain	-0.959164	-2.80444	2.14514	0.139152
RB1	P06400	P06400	RB_HUMAN	Retinoblastoma-associated protein	0.132417	1.14755	0.590716	0.58733
PGR	P06401	P06401	PRGR_HUMAN	Progesterone receptor	0.39005	1.51994	0.870231	0.453964
PTMA	P06454	P06454	PTMA_HUMAN	Prothymosin alpha	-0.0881841	-0.569878	0.243127	0.806839
CDK1	P06493	P06493	CDK1_HUMAN	Cyclin-dependent kinase 1	1.12573	3.2722	2.71258	0.0787938
ATP5F1B	P06576	P06576	ATPB_HUMAN	ATP synthase subunit beta, mitochondrial	-0.0298745	-0.176582	0.0652239	0.94546
C2	P06681	P06681	CO2_HUMAN	Complement C2	-0.0989006	-0.389746	0.155908	0.875011
S100A9	P06702	P06702	S10A9_HUMAN	Protein S100-A9	0.584315	1.25553	0.667313	0.546514
S100A6	P06703	P06703	S10A6_HUMAN	Protein S100-A6	-0.536574	-1.79464	1.10371	0.365516
APOA4	P06727	P06727	APOA4_HUMAN	Apolipoprotein A-IV	-0.332476	-1.54165	0.887851	0.446513
EIF4E	P06730	P06730	IF4E_HUMAN	Eukaryotic translation initiation factor 4E	-0.120846	-0.94257	0.455395	0.663877
ENO1	P06733	P06733	ENOA_HUMAN	Alpha-enolase	-0.117471	-0.849136	0.3981	0.700776
PYGL	P06737	P06737	PYGL_HUMAN	Glycogen phosphorylase, liver form	-0.105766	-0.583131	0.249934	0.802928
GPI	P06744	P06744	G6PI_HUMAN	Glucose-6-phosphate isomerase	0.118175	0.568931	0.242642	0.806909
POLB	P06746	P06746	DPOLB_HUMAN	DNA polymerase beta	-0.049686	-0.298273	0.115357	0.908083
NPM1	P06748	P06748	NPM_HUMAN	Nucleophosmin	-0.148912	-1.00022	0.492116	0.643175
TPM3	P06753	P06753	TPM3_HUMAN	Tropomyosin alpha-3 chain	0.360198	2.6536	1.97271	0.163686
ITGAV	P06756	P06756	ITAV_HUMAN	Integrin alpha-V	0.171751	1.08899	0.550708	0.609023
HEXA	P06865	P06865	HEXA_HUMAN	Beta-hexosaminidase subunit alpha	-0.0859713	-0.542529	0.229248	0.816949
SERPINE2	P07093	P07093	GDN_HUMAN	Glia-derived nexin	-0.126126	-0.741931	0.335734	0.743205
EPHX1	P07099	P07099	HYEP_HUMAN	Epoxide hydrolase 1	-0.145617	-0.58415	0.25046	0.802606
DBI	P07108	P07108	ACBP_HUMAN	Acyl-CoA-binding protein	-0.36513	-1.81842	1.12498	0.358366
CENPB	P07199	P07199	CENPB_HUMAN	Major centromere autoantigen B	0.0373976	0.30269	0.117258	0.9067
GPX1	P07203	P07203	GPX1_HUMAN	Glutathione peroxidase 1	-0.150082	-0.852712	0.400242	0.699106
PGK2	P07205	P07205	PGK2_HUMAN	Phosphoglycerate kinase 2	-0.18061	-1.17273	0.608251	0.578638
PROS1	P07225	P07225	PROS_HUMAN	Vitamin K-dependent protein S	0.187605	0.812416	0.376333	0.714709
P4HB	P07237	P07237	PDIA1_HUMAN	Protein disulfide-isomerase	0.114255	0.535666	0.225801	0.820015
H1-0	P07305	P07305	H10_HUMAN	Histone H1.0	-1.55105	-5.6538	6.124	0.00117073
ACYP1	P07311	P07311	ACYP1_HUMAN	Acylphosphatase-1	-0.810749	-6.0839	6.79022	0.000666667
CRYGC	P07315	P07315	CRGC_HUMAN	Gamma-crystallin C	0.070182	0.233601	0.0881776	0.927747
FES	P07332	P16591;P07332	FES_HUMAN	Tyrosine-protein kinase Fes/Fps	-0.434068	-3.88176	3.51638	0.0328353
CTSD	P07339	P07339	CATD_HUMAN	Cathepsin D	-0.345495	-2.05129	1.34202	0.292648
ANXA2	P07355	P07355;A6NMY6	ANXA2_HUMAN	Annexin A2	-0.989024	-5.55557	5.97289	0.00150327
C8A	P07357	P07357	CO8A_HUMAN	Complement component C8 alpha chain	0.3631	1.17491	0.609783	0.577661
C8B	P07358	P07358	CO8B_HUMAN	Complement component C8 beta chain	0.00874291	0.0344714	0.0120486	0.989222
C8G	P07360	P07360	CO8G_HUMAN	Complement component C8 gamma chain	-0.110294	-0.360361	0.14261	0.886722
CAPN1	P07384	P07384	CAN1_HUMAN	Calpain-1 catalytic subunit	-0.692748	-5.24576	5.49972	0.00299178
CA3	P07451	P07451	CAH3_HUMAN	Carbonic anhydrase 3	0.429163	1.30685	0.705001	0.52966
DCN	P07585	P07585	PGS2_HUMAN	Decorin	-1.28733	-2.75173	2.08427	0.147662
PSAP	P07602	P07602	SAP_HUMAN	Prosaposin	0.0100229	0.0869216	0.0310125	0.971732
HEXB	P07686	P07686	HEXB_HUMAN	Beta-hexosaminidase subunit beta	-0.0297051	-0.171963	0.0634054	0.947014
CTSL	P07711	P07711	CATL1_HUMAN	Procathepsin L	-0.699165	-3.15471	2.56565	0.0916261
BPGM	P07738	P07738	PMGE_HUMAN	Bisphosphoglycerate mutase	0.220091	0.916491	0.439127	0.67507
APRT	P07741	P07741	APT_HUMAN	Adenine phosphoribosyltransferase	-0.753394	-3.93009	3.58278	0.0304121
EPRS1	P07814	P07814	SYEP_HUMAN	Bifunctional glutamate/proline--tRNA ligase	0.0210306	0.167274	0.0615657	0.948791
CTSB	P07858	P07858	CATB_HUMAN	Cathepsin B	0.234221	1.18754	0.618659	0.571812
HSP90AA1	P07900	P07900	HS90A_HUMAN	Heat shock protein HSP 90-alpha	-0.223406	-1.83628	1.14107	0.352838
GALT	P07902	P07902	GALT_HUMAN	Galactose-1-phosphate uridylyltransferase	-0.468059	-3.3322	2.78869	0.0726876
HNRNPC	P07910	P07910	HNRPC_HUMAN	Heterogeneous nuclear ribonucleoproteins C1/C2	-0.128617	-1.00728	0.496686	0.64077
UQCRH	P07919	P07919	QCR6_HUMAN	Cytochrome b-c1 complex subunit 6, mitochondrial	-0.163043	-0.601708	0.259568	0.796357
LAMB1	P07942	P07942	LAMB1_HUMAN	Laminin subunit beta-1	0.435992	1.27165	0.679065	0.542327
YES1	P07947	P07947	YES_HUMAN	Tyrosine-protein kinase Yes	0.102523	0.857854	0.40333	0.696896
LYN	P07948	P07948	LYN_HUMAN	Tyrosine-protein kinase Lyn	-0.249645	-1.63612	0.966195	0.413689
FH	P07954	P07954	FUMH_HUMAN	Fumarate hydratase, mitochondrial	0.50981	2.45108	1.75001	0.202027
ERCC1	P07992	P07992	ERCC1_HUMAN	DNA excision repair protein ERCC-1	-0.14074	-1.21841	0.640571	0.560273
ZFX;ZFY	P08048;P17010	P08048;P17010	ZFX_HUMAN;ZFY_HUMAN	Zinc finger Y-chromosomal protein	-0.206053	-2.01231	1.30461	0.301984
IGF1R	P08069	P08069	IGF1R_HUMAN	Insulin-like growth factor 1 receptor	-0.420474	-2.35631	1.64941	0.221253
ANXA6	P08133	P08133	ANXA6_HUMAN	Annexin A6	-0.660204	-3.60017	3.13693	0.050532
RHOC	P08134	P08134	RHOC_HUMAN	Rho-related GTP-binding protein RhoC	0.387136	2.28268	1.57289	0.238079
CD55	P08174	P08174	DAF_HUMAN	Complement decay-accelerating factor	-0.0960374	-0.351413	0.138612	0.89014
SERPINA6	P08185	P08185	CBG_HUMAN	Corticosteroid-binding globulin	-0.591548	-2.15487	1.44353	0.266324
SLC3A2	P08195	P08195	4F2_HUMAN	4F2 cell-surface antigen heavy chain	0.507615	2.55394	1.86184	0.181364
GUSB	P08236	P08236	BGLR_HUMAN	Beta-glucuronidase	-0.028449	-0.126472	0.0458222	0.960278
PFKM	P08237	P08237	PFKAM_HUMAN	ATP-dependent 6-phosphofructokinase, muscle type	0.0494585	0.226463	0.0852524	0.930097
HSP90AB1	P08238	P08238	HS90B_HUMAN	Heat shock protein HSP 90-beta	0.359741	2.15142	1.4401	0.267408
SRPRA	P08240	P08240	SRPRA_HUMAN	Signal recognition particle receptor subunit alpha	-0.0923399	-0.881384	0.417565	0.687832
ASNS	P08243	P08243	ASNS_HUMAN	Asparagine synthetase [glutamine-hydrolyzing]	1.3017	4.4105	4.26068	0.0133472
GSTA1	P08263	P08263;Q7RTV2	GSTA1_HUMAN	Glutathione S-transferase A1	-1.67938	-5.18906	5.41375	0.00339842
SOD3	P08294	P08294	SODE_HUMAN	Extracellular superoxide dismutase [Cu-Zn]	-1.26995	-4.12931	3.86012	0.0220697
CTSG	P08311	P08311	CATG_HUMAN	Cathepsin G	0.631688	1.61978	0.952451	0.419519
HMBS	P08397	P08397	HEM3_HUMAN	Porphobilinogen deaminase	-0.0655122	-0.621601	0.270003	0.788976
MME	P08473	P08473	NEP_HUMAN	Neprilysin	-0.0283309	-0.143974	0.0525173	0.955765
PDHA1	P08559	P08559;P29803	ODPA_HUMAN	Pyruvate dehydrogenase E1 component subunit alpha, somatic form, mitochondrial	0.144787	0.848343	0.397625	0.701061
PLEK	P08567	P08567	PLEK_HUMAN	Pleckstrin	-0.208708	-0.822002	0.381975	0.71083
CD14	P08571	P08571	CD14_HUMAN	Monocyte differentiation antigen CD14	-0.799245	-3.40592	2.88315	0.0655
COL4A2	P08572	P08572	CO4A2_HUMAN	Collagen alpha-2(IV) chain	-0.682451	-3.13051	2.53573	0.0939678
CYC1	P08574	P08574	CY1_HUMAN	Cytochrome c1, heme protein, mitochondrial	0.0982763	0.47834	0.197573	0.843208
PTPRC	P08575	P08575	PTPRC_HUMAN	Receptor-type tyrosine-protein phosphatase C	-0.916217	-3.5896	3.12295	0.0508636
SNRPB2	P08579	P08579	RU2B_HUMAN	U2 small nuclear ribonucleoprotein B''	-0.035724	-0.321935	0.125609	0.900353
MELTF	P08582	P08582	TRFM_HUMAN	Melanotransferrin	-0.551688	-1.81363	1.12069	0.3598
MYL3	P08590	P08590	MYL3_HUMAN	Myosin light chain 3	-0.437128	-1.54904	0.893881	0.443982
CFH	P08603	P08603	CFAH_HUMAN	Complement factor H	-0.0808889	-0.294268	0.113638	0.909856
SNRNP70	P08621	P08621	RU17_HUMAN	U1 small nuclear ribonucleoprotein 70 kDa	-0.0916373	-0.956394	0.464105	0.659707
FCGR3A	P08637	P08637;O75015	FCG3A_HUMAN	Low affinity immunoglobulin gamma Fc region receptor III-A	-0.827088	-3.30101	2.74904	0.0757963
ITGA5	P08648	P08648	ITA5_HUMAN	Integrin alpha-5	-0.059756	-0.2338	0.0882592	0.927738
NFIC	P08651	Q14938;Q12857;O00712;P08651	NFIC_HUMAN	Nuclear factor 1 C-type	-0.853609	-6.62777	7.6393	6.50407e-05
SERPINF2	P08697	P08697	A2AP_HUMAN	Alpha-2-antiplasmin	-0.305735	-1.32132	0.715775	0.525333
RPS17	P08708	P08708	RS17_HUMAN	Small ribosomal subunit protein eS17	-0.133296	-1.32186	0.716176	0.525243
GNAI3	P08754	P08754	GNAI3_HUMAN	Guanine nucleotide-binding protein G(i) subunit alpha-3	-0.107224	-0.86474	0.407477	0.694355
ANXA5	P08758	P08758	ANXA5_HUMAN	Annexin A5	-0.921818	-7.121	8.41103	4.7619e-05
STS	P08842	P08842	STS_HUMAN	Steryl-sulfatase	-0.370789	-1.8541	1.15722	0.347628
RPSA	P08865	A0A8I5KQE6;P08865	RSSA_HUMAN	Small ribosomal subunit protein uS2	-0.284024	-2.81483	2.15722	0.137636
CD63	P08962	P08962	CD63_HUMAN	CD63 antigen	0.293055	1.28233	0.686894	0.538779
MRPL3	P09001	P09001	RM03_HUMAN	Large ribosomal subunit protein uL3m	0.0279639	0.200557	0.074761	0.938486
SNRPA	P09012	P09012	SNRPA_HUMAN	U1 small nuclear ribonucleoprotein A	-0.0380441	-0.397809	0.159603	0.871313
FGF2	P09038	P09038	FGF2_HUMAN	Fibroblast growth factor 2	-2.31936	-6.75093	7.83201	3.47826e-05
HOXB5	P09067	P09067	HXB5_HUMAN	Homeobox protein Hox-B5	-1.00132	-2.46439	1.76434	0.199144
ENO2	P09104	P09104	ENOG_HUMAN	Gamma-enolase	0.0332299	0.197554	0.0735571	0.939287
ACAA1	P09110	P09110	THIK_HUMAN	3-ketoacyl-CoA thiolase, peroxisomal	0.0891261	0.41761	0.168757	0.865677
SRP19	P09132	P09132	SRP19_HUMAN	Signal recognition particle 19 kDa protein	0.347121	2.36371	1.65718	0.219922
GSTP1	P09211	P09211	GSTP1_HUMAN	Glutathione S-transferase P	-0.468663	-3.29607	2.74277	0.0763376
SNRPC	P09234	P09234	RU1C_HUMAN	U1 small nuclear ribonucleoprotein C	0.0496699	0.484417	0.200518	0.841239
MMP7	P09237	P09237	MMP7_HUMAN	Matrilysin	0.216594	0.544113	0.230046	0.816714
LGALS1	P09382	P09382	LEG1_HUMAN	Galectin-1	-0.133397	-0.534805	0.22537	0.82038
QDPR	P09417	P09417	DHPR_HUMAN	Dihydropteridine reductase	-0.516395	-3.60033	3.13714	0.0506033
HMGB1	P09429	P09429;P26583	HMGB1_HUMAN	High mobility group protein B1	-0.126165	-0.946454	0.457836	0.66226
RBP1	P09455	P09455	RET1_HUMAN	Retinol-binding protein 1	-0.451714	-1.39218	0.769472	0.501967
FBP1	P09467	O00757;P09467	F16P1_HUMAN	Fructose-1,6-bisphosphatase 1	-0.99952	-3.22518	2.65344	0.0839421
GNAO1	P09471	P09471	GNAO_HUMAN	Guanine nucleotide-binding protein G(o) subunit alpha	-0.558275	-1.52976	0.878182	0.450137
TPM1	P09493	P09493	TPM1_HUMAN	Tropomyosin alpha-1 chain	0.0257723	0.104117	0.0373973	0.966561
CLTA	P09496	P09496	CLCA_HUMAN	Clathrin light chain A	-0.11922	-0.686653	0.304979	0.765402
CLTB	P09497	P09497	CLCB_HUMAN	Clathrin light chain B	-0.221329	-1.38471	0.763744	0.503179
ANXA4	P09525	P09525	ANXA4_HUMAN	Annexin A4	-0.736236	-3.55532	3.07773	0.0535153
CNP	P09543	P09543	CN37_HUMAN	2',3'-cyclic-nucleotide 3'-phosphodiesterase	0.0131553	0.123047	0.0445224	0.961103
HMOX1	P09601	P09601	HMOX1_HUMAN	Heme oxygenase 1	-0.20478	-1.31607	0.711855	0.52687
PDGFRB	P09619	P09619	PGFRB_HUMAN	Platelet-derived growth factor receptor beta	-0.274419	-0.850592	0.398971	0.700192
DLD	P09622	P09622	DLDH_HUMAN	Dihydrolipoyl dehydrogenase, mitochondrial	0.363325	1.95446	1.24987	0.3182
HNRNPA1	P09651	A0A2R8Y4L2;P09651	ROA1_HUMAN	Heterogeneous nuclear ribonucleoprotein A1	0.164853	0.970857	0.473282	0.654142
SNRPA1	P09661	P09661	RU2A_HUMAN	U2 small nuclear ribonucleoprotein A'	-0.018125	-0.162293	0.0596183	0.949261
CTSH	P09668	P09668	CATH_HUMAN	Pro-cathepsin H	-0.485097	-2.15523	1.4439	0.266374
COX6C	P09669	P09669	COX6C_HUMAN	Cytochrome c oxidase subunit 6C	-0.343129	-1.60152	0.937184	0.426287
TACSTD2	P09758	P09758	TACD2_HUMAN	Tumor-associated calcium signal transducer 2	0.0726321	0.287322	0.110669	0.911704
C1S	P09871	P09871	C1S_HUMAN	Complement C1s subcomponent	0.0653064	0.25396	0.0966016	0.921124
PARP1	P09874	P09874	PARP1_HUMAN	Poly [ADP-ribose] polymerase 1	0.525729	3.03451	2.4183	0.105981
POLA1	P09884	P09884	DPOLA_HUMAN	DNA polymerase alpha catalytic subunit	0.0695952	0.586415	0.25163	0.801627
IFIT2	P09913	P09913	IFIT2_HUMAN	Interferon-induced protein with tetratricopeptide repeats 2	-0.822455	-3.14848	2.55794	0.0923355
IFIT1	P09914	P09914	IFIT1_HUMAN	Interferon-induced protein with tetratricopeptide repeats 1	-0.622109	-2.34695	1.6396	0.223261
ALOX5	P09917	P09917	LOX5_HUMAN	Polyunsaturated fatty acid 5-lipoxygenase	-0.702966	-2.71938	2.04724	0.153202
UCHL1	P09936	P09936	UCHL1_HUMAN	Ubiquitin carboxyl-terminal hydrolase isozyme L1	1.03095	1.51988	0.870183	0.453779
FURIN	P09958	P09958	FURIN_HUMAN	Furin	-0.313302	-1.9512	1.24681	0.318927
LTA4H	P09960	P09960	LKHA4_HUMAN	Leukotriene A-4 hydrolase	-0.824794	-4.86558	4.92797	0.00583501
ALDOC	P09972	P09972	ALDOC_HUMAN	Fructose-bisphosphate aldolase C	-0.332824	-1.59358	0.930577	0.429167
C4A	P0C0L4	P0C0L4	CO4A_HUMAN	Complement C4-A	-0.30052	-1.43263	0.800831	0.487489
H2AZ1;H2AZ2	P0C0S5;Q71UI9	P0C0S5;Q71UI9	H2AV_HUMAN;H2AZ_HUMAN	Histone H2A.Z	0.0404364	0.199401	0.0742972	0.938678
TFPT	P0C1Z6	P0C1Z6	TFPT_HUMAN	TCF3 fusion partner	-0.126424	-1.22568	0.645776	0.557606
FBXO45	P0C2W1	P0C2W1	FBSP1_HUMAN	F-box/SPRY domain-containing protein 1	-0.0719508	-0.565047	0.240658	0.808308
ATXN1L	P0C7T5	P0C7T5	ATX1L_HUMAN	Ataxin-1-like	-0.536085	-2.83942	2.18589	0.133698
ZNF688	P0C7X2	P0C7X2	ZN688_HUMAN	Zinc finger protein 688	-0.940274	-5.14214	5.34279	0.00367595
PLA2G4B	P0C869	P0C869	PA24B_HUMAN	Cytosolic phospholipase A2 beta	-0.107559	-0.50307	0.209627	0.832793
JMJD7	P0C870	P0C870	JMJD7_HUMAN	Bifunctional peptidase and (3S)-lysyl hydroxylase JMJD7	-0.565802	-2.9508	2.31754	0.117247
POLR2M	P0CAP2	P0CAP2	GRL1A_HUMAN	DNA-directed RNA polymerase II subunit GRINL1A	-0.850141	-6.57006	7.54901	0.000124031
DERPC	P0CG12	P0CG12	DERPC_HUMAN	Decreased expression in renal and prostate cancer protein	-0.470599	-3.74755	3.3339	0.0400192
ZNF888	P0CJ79	P0CJ79	ZN888_HUMAN	Zinc finger protein 888	-0.107906	-0.690118	0.306879	0.763805
SLC35E2B	P0CK96	P0CK96	S352B_HUMAN	Solute carrier family 35 member E2B	-0.18554	-1.11636	0.569271	0.600024
LIMS3;LIMS4	P0CW19;P0CW20	P0CW19;P0CW20	LIMS3_HUMAN;LIMS4_HUMAN	LIM and senescent cell antigen-like-containing domain protein 3	-0.379125	-1.34209	0.731351	0.517878
TRAPPC2;TRAPPC2B	P0DI81;P0DI82	P0DI82;P0DI81	TPC2A_HUMAN;TPC2B_HUMAN	Trafficking protein particle complex subunit 2	-0.183714	-1.68329	1.00632	0.400357
PET100	P0DJ07	P0DJ07	PT100_HUMAN	Protein PET100 homolog, mitochondrial	-0.730721	-3.14834	2.55776	0.0923065
HSPA1A;HSPA1B	P0DMV8;P0DMV9	P0DMV9;P0DMV8	HS71A_HUMAN;HS71B_HUMAN	Heat shock 70 kDa protein 1A	-0.453863	-3.03031	2.41322	0.106491
IGLC2	P0DOY2	P0DOY3;P0DOY2	IGLC2_HUMAN	Immunoglobulin lambda constant 2	-0.219903	-0.713347	0.319712	0.755862
CALM1;CALM2;CALM3	P0DP23;P0DP24;P0DP25	P0DP24;P0DP25;P0DP23	CALM1_HUMAN;CALM2_HUMAN;CALM3_HUMAN	Calmodulin-1	-0.301579	-3.6612	3.21804	0.0461538
POLR1D	P0DPB6	P0DPB6	RPAC2_HUMAN	DNA-directed RNA polymerases I and III subunit RPAC2	-0.022646	-0.259923	0.0990919	0.920126
EEF1AKMT4-ECE2	P0DPD8	P0DPD7;P0DPD8	EFCE2_HUMAN	EEF1AKMT4-ECE2 readthrough transcript protein	1.45244	4.64142	4.59662	0.00903986
TUBA3C;TUBA3D;TUBA3E	P0DPH7;P0DPH8;Q6PEY2	P0DPH7;Q6PEY2;P0DPH8	TBA3C_HUMAN;TBA3D_HUMAN;TBA3E_HUMAN	Tubulin alpha-3C chain	-0.222847	-0.617565	0.267876	0.789909
ZFTRAF1	P0DTL6	P0DTL6;E9PQ42	ZTRF1_HUMAN	Zinc finger TRAF-type-containing protein 1	0.177838	1.7485	1.06291	0.379984
GLI4	P10075	P10075	GLI4_HUMAN	Zinc finger protein GLI4	-0.123941	-0.637138	0.278238	0.782649
FDX1	P10109	P10109	ADX_HUMAN	Adrenodoxin, mitochondrial	0.0425781	0.322147	0.125701	0.900342
RAP2A	P10114	P10114	RAP2A_HUMAN	Ras-related protein Rap-2a	-0.161741	-1.23283	0.65091	0.554728
RO60	P10155	P10155	RO60_HUMAN	RNA-binding protein RO60	-0.504725	-4.39493	4.23824	0.0137751
GAA	P10253	P10253	LYAG_HUMAN	Lysosomal alpha-glucosidase	-0.619521	-2.71577	2.04312	0.153749
AR	P10275	P10275	ANDR_HUMAN	Androgen receptor	-0.701631	-3.46932	2.96522	0.0600382
RRAS	P10301	P10301	RRAS_HUMAN	Ras-related protein R-Ras	-0.515109	-2.89582	2.25221	0.124879
HLA-C	P10321	P10321	HLAC_HUMAN	HLA class I histocompatibility antigen, C alpha chain	0.311003	0.899331	0.428539	0.680769
ARAF	P10398	P10398	ARAF_HUMAN	Serine/threonine-protein kinase A-Raf	-0.146278	-1.38996	0.767767	0.502664
H1-4	P10412	Q02539;P16402;P10412;P16401;P16403	H14_HUMAN	Histone H1.4	-0.394813	-2.79676	2.13622	0.140605
BCL2	P10415	P10415	BCL2_HUMAN	Apoptosis regulator Bcl-2	-0.492703	-1.88186	1.18255	0.339715
DLAT	P10515	P10515	ODP2_HUMAN	Dihydrolipoyllysine-residue acetyltransferase component of pyruvate dehydrogenase complex, mitochondrial	0.192708	1.28639	0.689875	0.537259
PTPRF	P10586	P10586	PTPRF_HUMAN	Receptor-type tyrosine-protein phosphatase F	0.154623	0.95132	0.460901	0.660961
NR2F6	P10588	P10588	NR2F6_HUMAN	Nuclear receptor subfamily 2 group F member 6	0.167098	1.12067	0.572217	0.59783
NR2F1	P10589	P10589	COT1_HUMAN	COUP transcription factor 1	-1.11804	-6.03816	6.71907	0.000697436
TXN	P10599	P10599	THIO_HUMAN	Thioredoxin	-0.502772	-3.25287	2.68821	0.0806634
COX5B	P10606	P10606	COX5B_HUMAN	Cytochrome c oxidase subunit 5B, mitochondrial	-0.211796	-1.38048	0.760498	0.504639
CTSA	P10619	P10619	PPGB_HUMAN	Lysosomal protective protein	0.8682	5.86464	6.44976	0.000820513
MGST1	P10620	P10620	MGST1_HUMAN	Microsomal glutathione S-transferase 1	-0.272337	-0.692124	0.307981	0.763407
C7	P10643	P10643	CO7_HUMAN	Complement component C7	-0.416767	-1.95953	1.25464	0.317055
PRKAR1A	P10644	P10644	KAP0_HUMAN	cAMP-dependent protein kinase type I-alpha regulatory subunit	-0.0465399	-0.309814	0.120337	0.904353
ALPG	P10696	P10696	PPBN_HUMAN	Alkaline phosphatase, germ cell type	0.0433476	0.0840798	0.0299654	0.972438
UROS	P10746	P10746	HEM4_HUMAN	Uroporphyrinogen-III synthase	-0.20382	-2.25086	1.54027	0.245169
ESD	P10768	P10768	ESTD_HUMAN	S-formylglutathione hydrolase	-0.779662	-5.44778	5.80763	0.00196364
HSPD1	P10809	P10809	CH60_HUMAN	60 kDa heat shock protein, mitochondrial	0.583866	2.66426	1.98472	0.161827
CLU	P10909	P10909	CLUS_HUMAN	Clusterin	-0.621777	-2.45091	1.74983	0.202
HSPA5	P11021	P11021	BIP_HUMAN	Endoplasmic reticulum chaperone BiP	0.107137	0.744298	0.337072	0.742284
LAMC1	P11047	P11047	LAMC1_HUMAN	Laminin subunit gamma-1	-0.313297	-1.43568	0.803219	0.486989
PNMT	P11086	P11086	PNMT_HUMAN	Phenylethanolamine N-methyltransferase	-0.615969	-2.71971	2.04762	0.153187
ACP2	P11117	P11117	PPAL_HUMAN	Lysosomal acid phosphatase	0.166757	1.00313	0.493996	0.642297
MAP2	P11137	P11137	MTAP2_HUMAN	Microtubule-associated protein 2	1.0663	2.90978	2.26873	0.123058
HSPA8	P11142	P11142;P54652	HSP7C_HUMAN	Heat shock cognate 71 kDa protein	-0.0047821	-0.03889	0.0136166	0.988041
SLC2A1	P11166	P11166	GTR1_HUMAN	Solute carrier family 2, facilitated glucose transporter member 1	0.739019	2.58162	1.89238	0.175715
EPB41	P11171	P11171	EPB41_HUMAN	Protein 4.1	0.345006	1.59243	0.929624	0.429284
UMPS	P11172	P11172	UMPS_HUMAN	Uridine 5'-monophosphate synthase	0.291377	2.01511	1.30728	0.301454
PDHB	P11177	P11177	ODPB_HUMAN	Pyruvate dehydrogenase E1 component subunit beta, mitochondrial	0.131975	0.671336	0.296626	0.771104
DBT	P11182	P11182	ODB2_HUMAN	Lipoamide acyltransferase component of branched-chain alpha-keto acid dehydrogenase complex, mitochondrial	-0.00841076	-0.0523166	0.0184147	0.984007
ITGAM	P11215	P11215	ITAM_HUMAN	Integrin alpha-M	-0.654272	-2.49546	1.79793	0.192207
PYGB	P11216	P06737;P11217;P11216	PYGB_HUMAN	Glycogen phosphorylase, brain form	-0.0178508	-0.111969	0.0403404	0.964305
PYGM	P11217	P11217	PYGM_HUMAN	Glycogen phosphorylase, muscle form	0.271853	1.50346	0.856949	0.459463
RALA	P11233	P11233	RALA_HUMAN	Ras-related protein Ral-A	-0.0992066	-0.802359	0.370445	0.719013
RALB	P11234	P11234	RALB_HUMAN	Ras-related protein Ral-B	-0.0920666	-0.706326	0.315816	0.758314
BCR	P11274	P11274	BCR_HUMAN	Breakpoint cluster region protein	-0.440756	-3.04947	2.43648	0.103929
SPTB	P11277	P11277	SPTB1_HUMAN	Spectrin beta chain, erythrocytic	0.00749178	0.0316972	0.0110668	0.990279
LAMP1	P11279	P11279	LAMP1_HUMAN	Lysosome-associated membrane glycoprotein 1	0.415715	2.75481	2.0878	0.147231
ACADM	P11310	P11310	ACADM_HUMAN	Medium-chain specific acyl-CoA dehydrogenase, mitochondrial	-0.193777	-1.16559	0.603261	0.581475
FGFR1	P11362	P11362;P21802;P22607;P22455	FGFR1_HUMAN	Fibroblast growth factor receptor 1	0.244315	1.13535	0.582295	0.592776
TOP1	P11387	P11387	TOP1_HUMAN	DNA topoisomerase 1	0.409465	2.57341	1.8833	0.177519
TOP2A	P11388	P11388	TOP2A_HUMAN	DNA topoisomerase 2-alpha	1.86493	4.32029	4.13109	0.0156713
G6PD	P11413	P11413	G6PD_HUMAN	Glucose-6-phosphate 1-dehydrogenase	0.0303827	0.19765	0.0735958	0.939348
UBL4A	P11441	P11441	UBL4A_HUMAN	Ubiquitin-like protein 4A	-0.0943518	-1.15707	0.597321	0.583576
ESRRA	P11474	P11474	ERR1_HUMAN	Steroid hormone receptor ERR1	0.071972	0.432408	0.175676	0.859768
PC	P11498	P11498	PYC_HUMAN	Pyruvate carboxylase, mitochondrial	0.207019	0.92855	0.446623	0.669913
DMD	P11532	P11532	DMD_HUMAN	Dystrophin	-0.68265	-4.07638	3.78589	0.0241006
MTHFD1	P11586	P11586	C1TC_HUMAN	C-1-tetrahydrofolate synthase, cytoplasmic	-0.121227	-0.76145	0.346821	0.735943
IGF2R	P11717	P11717	MPRI_HUMAN	Cation-independent mannose-6-phosphate receptor	0.167342	1.25115	0.664135	0.547436
ADH5	P11766	P11766	ADHX_HUMAN	Alcohol dehydrogenase class-3	-0.468448	-2.77751	2.11396	0.143715
CDK4	P11802	P11802	CDK4_HUMAN	Cyclin-dependent kinase 4	0.336996	2.44583	1.74438	0.202948
PRPS2	P11908	P21108;P11908;P60891	PRPS2_HUMAN	Ribose-phosphate pyrophosphokinase 2	-0.751417	-5.27864	5.54965	0.00272981
PABPC1	P11940	P11940;Q4VXU2	PABP1_HUMAN	Polyadenylate-binding protein 1	0.26709	1.85068	1.15411	0.348836
PCNA	P12004	P12004	PCNA_HUMAN	Proliferating cell nuclear antigen	0.395976	2.19763	1.48632	0.256779
HARS1	P12081	P12081;P49590	HARS1_HUMAN	Histidine--tRNA ligase, cytoplasmic	-0.433042	-3.59083	3.12458	0.0508537
COL6A1	P12109	P12109	CO6A1_HUMAN	Collagen alpha-1(VI) chain	-0.755835	-2.28879	1.57918	0.236931
COL6A2	P12110	P12110	CO6A2_HUMAN	Collagen alpha-2(VI) chain	-1.00664	-2.25453	1.54401	0.244128
COL6A3	P12111	P12111	CO6A3_HUMAN	Collagen alpha-3(VI) chain	-0.779508	-2.19467	1.48333	0.257556
SLC25A4	P12235	P12235	ADT1_HUMAN	ADP/ATP translocase 1	-0.0529128	-0.306589	0.118941	0.905276
SLC25A6	P12236	P12236	ADT3_HUMAN	ADP/ATP translocase 3	0.481421	2.29539	1.586	0.235387
IMPDH2	P12268	P12268	IMDH2_HUMAN	Inosine-5'-monophosphate dehydrogenase 2	-0.0932063	-0.563587	0.239913	0.80903
TPR	P12270	P12270	TPR_HUMAN	Nucleoprotein TPR	0.073295	0.735651	0.332192	0.746152
PIP	P12273	P12273	PIP_HUMAN	Prolactin-inducible protein	0.843818	2.17879	1.46741	0.260904
CKB	P12277	P12277	KCRB_HUMAN	Creatine kinase B-type	-0.732072	-2.40609	1.70196	0.211545
FCGR1A	P12314	P12314	FCGR1_HUMAN	High affinity immunoglobulin gamma Fc receptor I	-0.552611	-2.51446	1.81859	0.188647
ANXA3	P12429	P12429	ANXA3_HUMAN	Annexin A3	-0.167953	-0.466005	0.19163	0.84712
CKMT1B	P12532	P12532	KCRU_HUMAN	Creatine kinase U-type, mitochondrial	0.818895	2.11756	1.40662	0.275577
BCKDHA	P12694	P12694	ODBA_HUMAN	2-oxoisovalerate dehydrogenase subunit alpha, mitochondrial	-0.237974	-1.50609	0.859062	0.458321
SKI	P12755	P12755	SKI_HUMAN	Ski oncogene	-0.75172	-2.88747	2.24234	0.126107
ACTN1	P12814	P12814;P35609	ACTN1_HUMAN	Alpha-actinin-1	-0.295233	-2.11273	1.40188	0.276787
ACE	P12821	P12821	ACE_HUMAN	Angiotensin-converting enzyme	-0.219832	-0.768115	0.350634	0.733644
MYL4	P12829	P12829	MYL4_HUMAN	Myosin light chain 4	-0.612158	-1.22346	0.644183	0.558157
CDH1	P12830	P12830	CADH1_HUMAN	Cadherin-1	-0.312222	-2.05848	1.34897	0.290354
SRC	P12931	P12931;P07947;P06241	SRC_HUMAN	Proto-oncogene tyrosine-protein kinase Src	0.0899511	0.627888	0.273326	0.786244
PEPD	P12955	P12955	PEPD_HUMAN	Xaa-Pro dipeptidase	0.440615	2.20252	1.49124	0.255898
XRCC6	P12956	P12956	XRCC6_HUMAN	X-ray repair cross-complementing protein 6	-0.602333	-4.64689	4.60465	0.00897731
XRCC5	P13010	P13010	XRCC5_HUMAN	X-ray repair cross-complementing protein 5	-0.502216	-4.3992	4.2444	0.0136474
UNG	P13051	P13051	UNG_HUMAN	Uracil-DNA glycosylase	0.261781	1.21674	0.639378	0.560898
COX4I1	P13073	P13073	COX41_HUMAN	Cytochrome c oxidase subunit 4 isoform 1, mitochondrial	-0.179009	-1.19992	0.627409	0.567389
LAMP2	P13473	P13473	LAMP2_HUMAN	Lysosome-associated membrane glycoprotein 2	0.26226	1.47525	0.834414	0.471679
RNH1	P13489	P13489	RINI_HUMAN	Ribonuclease inhibitor	-0.758588	-4.66992	4.63849	0.00865
CYBA	P13498	P13498	CY24A_HUMAN	Cytochrome b-245 light chain	0.00438124	0.01957	0.00680004	0.992206
NCAM1	P13591	P13591	NCAM1_HUMAN	Neural cell adhesion molecule 1	0.189642	0.410007	0.165228	0.867763
VCAN	P13611	P13611	CSPG2_HUMAN	Versican core protein	0.301728	0.857501	0.403118	0.696757
EEF2	P13639	P13639	EF2_HUMAN	Elongation factor 2	-0.244723	-2.01405	1.30627	0.301823
PDIA4	P13667	P13667	PDIA4_HUMAN	Protein disulfide-isomerase A4	0.425173	2.29329	1.58382	0.235825
C6	P13671	P13671	CO6_HUMAN	Complement component C6	-0.264319	-0.801568	0.369983	0.719427
P4HA1	P13674	P13674	P4HA1_HUMAN	Prolyl 4-hydroxylase subunit alpha-1	0.0586359	0.472092	0.194557	0.845736
CEACAM1	P13688	P06731;P31997;P13688	CEAM1_HUMAN	Carcinoembryonic antigen-related cell adhesion molecule 1	0.583515	1.66938	0.994426	0.404402
TPT1	P13693	Q56UQ5;P13693	TCTP_HUMAN	Translationally-controlled tumor protein	0.0334315	0.253006	0.0962046	0.921533
ALAD	P13716	P13716	HEM2_HUMAN	Delta-aminolevulinic acid dehydratase	-0.728669	-4.56757	4.48855	0.0103723
HLA-E	P13747	P13747	HLAE_HUMAN	HLA class I histocompatibility antigen, alpha chain E	-0.196993	-0.853146	0.400502	0.699161
LCP1	P13796	P13796	PLSL_HUMAN	Plastin-2	-0.46675	-1.6399	0.969386	0.412559
PLS3	P13797	P13797	PLST_HUMAN	Plastin-3	-0.434	-1.75676	1.07016	0.377139
APEH	P13798	P13798	ACPH_HUMAN	Acylamino-acid-releasing enzyme	-0.257116	-1.6209	0.953388	0.419586
ETFA	P13804	P13804	ETFA_HUMAN	Electron transfer flavoprotein subunit alpha, mitochondrial	-0.343369	-2.05295	1.34363	0.291953
GYS1	P13807	P13807	GYS1_HUMAN	Glycogen [starch] synthase, muscle	-0.515088	-2.87997	2.2335	0.127659
PRKAR2A	P13861	P13861	KAP2_HUMAN	cAMP-dependent protein kinase type II-alpha regulatory subunit	-0.386471	-3.75339	3.34178	0.0397115
GTF2F2	P13984	P13984	T2FB_HUMAN	General transcription factor IIF subunit 2	-0.0519463	-0.41716	0.168548	0.865748
CD59	P13987	P13987	CD59_HUMAN	CD59 glycoprotein	-0.246336	-1.42794	0.797172	0.488862
YJU2B	P13994	P13994	YJU2B_HUMAN	Probable splicing factor YJU2B	0.0848208	0.256877	0.0978185	0.92065
MTHFD2	P13995	P13995	MTDC_HUMAN	Bifunctional methylenetetrahydrofolate dehydrogenase/cyclohydrolase, mitochondrial	1.37132	4.68583	4.66189	0.0083906
MIF	P14174	P14174	MIF_HUMAN	Macrophage migration inhibitory factor	-0.463373	-1.07022	0.538111	0.616284
CD99	P14209	P14209	CD99_HUMAN	CD99 antigen	-0.508448	-1.67229	0.996905	0.403859
PRKCSH	P14314	P14314	GLU2B_HUMAN	Glucosidase 2 subunit beta	0.212229	1.10752	0.56325	0.602955
HCLS1	P14317	P14317	HCLS1_HUMAN	Hematopoietic lineage cell-specific protein	-0.132028	-0.408836	0.164686	0.867688
FDPS	P14324	P14324	FPPS_HUMAN	Farnesyl pyrophosphate synthase	0.277724	1.65563	0.982714	0.407302
TRIM27	P14373	P14373	TRI27_HUMAN	Zinc finger protein RFP	0.068186	0.514389	0.215207	0.828158
CPM	P14384	P14384	CBPM_HUMAN	Carboxypeptidase M	0.890503	2.65267	1.97167	0.163858
COX7A2	P14406	P14406	CX7A2_HUMAN	Cytochrome c oxidase subunit 7A2, mitochondrial	-0.494653	-1.9731	1.26741	0.313652
NID1	P14543	P14543	NID1_HUMAN	Nidogen-1	-0.753068	-2.99905	2.37544	0.110296
AKR1A1	P14550	P14550	AK1A1_HUMAN	Aldo-keto reductase family 1 member A1	-0.759795	-4.4437	4.30861	0.0128418
NCF1	P14598	A8MVU1;A6NI72;P14598	NCF1_HUMAN	Neutrophil cytosol factor 1	-0.0267929	-0.154471	0.0565745	0.951315
PKM	P14618	P14618	KPYM_HUMAN	Pyruvate kinase PKM	-0.484628	-3.59902	3.1354	0.0505627
ACYP2	P14621	P14621	ACYP2_HUMAN	Acylphosphatase-2	0.0785281	0.46609	0.19167	0.847322
HSP90B1	P14625	P14625	ENPL_HUMAN	Endoplasmin	-0.0444576	-0.351642	0.138714	0.890223
MYL6B	P14649	P14649	MYL6B_HUMAN	Myosin light chain 6B	-0.0702158	-0.426624	0.172964	0.861569
SLC2A4	P14672	P14672	GLUT4_HUMAN	Solute carrier family 2, facilitated glucose transporter member 4	-0.571151	-2.9114	2.27064	0.123027
SNRPB	P14678	P14678	RSMB_HUMAN	Small nuclear ribonucleoprotein-associated proteins B and B'	-0.114658	-1.02707	0.509579	0.63451
IDE	P14735	P14735	IDE_HUMAN	Insulin-degrading enzyme	0.175146	1.6056	0.940585	0.424809
COX6B1	P14854	P14854	CX6B1_HUMAN	Cytochrome c oxidase subunit 6B1	-0.217086	-1.17609	0.610603	0.576963
POU2F1	P14859	P14859;Q9UKI9	PO2F1_HUMAN	POU domain, class 2, transcription factor 1	-0.0629562	-0.508668	0.212382	0.830471
HNRNPL	P14866	P14866	HNRPL_HUMAN	Heterogeneous nuclear ribonucleoprotein L	-0.0787711	-0.502359	0.209279	0.832915
DARS1	P14868	P14868	SYDC_HUMAN	Aspartate--tRNA ligase, cytoplasmic	0.0335325	0.333436	0.130651	0.896255
JUP	P14923	P14923	PLAK_HUMAN	Junction plakoglobin	-0.457551	-3.35293	2.81515	0.0704775
UQCRB	P14927	P14927	QCR7_HUMAN	Cytochrome b-c1 complex subunit 7	-0.365684	-1.76303	1.07569	0.37514
BRAF	P15056	P15056	BRAF_HUMAN	Serine/threonine-protein kinase B-raf	-0.207743	-1.44261	0.808643	0.48419
GLUL	P15104	P15104	GLNA_HUMAN	Glutamine synthetase	0.419523	2.04323	1.33425	0.29445
AKR1B1	P15121	P15121	ALDR_HUMAN	Aldo-keto reductase family 1 member B1	-0.284354	-1.16086	0.599963	0.582758
ANPEP	P15144	P15144	AMPN_HUMAN	Aminopeptidase N	0.391438	0.983272	0.481212	0.649055
PVR	P15151	P15151	PVR_HUMAN	Poliovirus receptor	-0.555795	-1.92173	1.21933	0.327792
RAC2	P15153	P15153	RAC2_HUMAN	Ras-related C3 botulinum toxin substrate 2	-0.807888	-3.2013	2.62358	0.086259
GSPT1	P15170	P15170	ERF3A_HUMAN	Eukaryotic peptide chain release factor GTP-binding subunit ERF3A	0.162788	1.51567	0.866784	0.454475
PGAM2	P15259	P15259	PGAM2_HUMAN	Phosphoglycerate mutase 2	-0.020061	-0.102728	0.0368786	0.966848
IFNGR1	P15260	P15260	INGR1_HUMAN	Interferon gamma receptor 1	0.102717	0.653167	0.286811	0.776978
ARSA	P15289	P15289	ARSA_HUMAN	Arylsulfatase A	-0.591066	-2.34125	1.63365	0.224621
B4GALT1	P15291	P15291	B4GT1_HUMAN	Beta-1,4-galactosyltransferase 1	-0.091586	-0.511295	0.213678	0.829373
ACP3	P15309	P15309	PPAP_HUMAN	Prostatic acid phosphatase	0.509095	2.09352	1.38305	0.281546
EZR	P15311	P15311	EZRI_HUMAN	Ezrin	-0.483232	-2.59072	1.90247	0.174543
ATP6V1B1	P15313	P15313	VATB1_HUMAN	V-type proton ATPase subunit B, kidney isoform	-0.181968	-0.551187	0.233617	0.813748
FOLR1	P15328	P15328	FOLR1_HUMAN	Folate receptor alpha	0.0499297	0.148454	0.054245	0.953702
ATF2	P15336	P15336	ATF2_HUMAN	Cyclic AMP-dependent transcription factor ATF-2	-0.356547	-3.25294	2.6883	0.0807141
UCHL3	P15374	P15374	UCHL3_HUMAN	Ubiquitin carboxyl-terminal hydrolase isozyme L3	-0.026395	-0.204851	0.0764863	0.93701
FOSL2	P15408	P15408	FOSL2_HUMAN	Fos-related antigen 2	0.493083	2.62334	1.93879	0.169351
VAV1	P15498	P15498	VAV_HUMAN	Proto-oncogene vav	-0.750635	-2.11883	1.40788	0.275421
CD46	P15529	P15529	MCP_HUMAN	Membrane cofactor protein	0.018547	0.0641609	0.022689	0.979487
NME1	P15531	P15531	NDKA_HUMAN	Nucleoside diphosphate kinase A	0.119019	0.588267	0.252588	0.801007
NQO1	P15559	P15559	NQO1_HUMAN	NAD(P)H dehydrogenase [quinone] 1	0.172496	0.431506	0.175252	0.859784
GNS	P15586	P15586	GNS_HUMAN	N-acetylglucosamine-6-sulfatase	0.431722	2.6021	1.91511	0.172355
PHKG2	P15735	P15735	PHKG2_HUMAN	Phosphorylase b kinase gamma catalytic chain, liver/testis isoform	-0.285323	-1.73002	1.04675	0.385243
RPS2	P15880	P15880	RS2_HUMAN	Small ribosomal subunit protein uS5	-0.212427	-2.21416	1.50299	0.253574
ST6GAL1	P15907	P15907	SIAT1_HUMAN	Beta-galactoside alpha-2,6-sialyltransferase 1	0.359021	2.1416	1.43037	0.269622
DSP	P15924	P15924	DESP_HUMAN	Desmoplakin	-0.222542	-1.72	1.03803	0.388032
RPA2	P15927	P15927	RFA2_HUMAN	Replication protein A 32 kDa subunit	-0.391149	-3.5273	3.04092	0.0557174
MUC1	P15941	P15941	MUC1_HUMAN	Mucin-1	-0.407225	-1.8641	1.16632	0.344778
COX7C	P15954	P15954	COX7C_HUMAN	Cytochrome c oxidase subunit 7C, mitochondrial	-0.254279	-1.22835	0.64769	0.556611
NPR1	P16066	P16066	ANPRA_HUMAN	Atrial natriuretic peptide receptor 1	-0.804255	-3.41625	2.89647	0.0646298
CD44	P16070	P16070	CD44_HUMAN	CD44 antigen	-0.667443	-2.3154	1.60672	0.230001
NQO2	P16083	P16083	NQO2_HUMAN	Ribosyldihydronicotinamide dehydrogenase [quinone]	-0.488228	-1.41646	0.788233	0.492798
ITGB4	P16144	P16144	ITB4_HUMAN	Integrin beta-4	-0.543941	-3.08037	2.47416	0.100133
CBR1	P16152	P16152	CBR1_HUMAN	Carbonyl reductase [NADPH] 1	-0.609099	-3.3259	2.78066	0.0731242
ANK1	P16157	P16157	ANK1_HUMAN	Ankyrin-1	-0.061904	-0.142345	0.0518906	0.956321
ACADS	P16219	P16219	ACADS_HUMAN	Short-chain specific acyl-CoA dehydrogenase, mitochondrial	-0.424388	-2.0871	1.37678	0.283152
CREB1	P16220	P18846;P16220	CREB1_HUMAN	Cyclic AMP-responsive element-binding protein 1	-0.0743852	-0.681089	0.301937	0.766993
GLB1	P16278	P16278	BGAL_HUMAN	Beta-galactosidase	0.746334	4.33611	4.15375	0.0152454
PPP3CB	P16298	P16298	PP2BB_HUMAN	Serine/threonine-protein phosphatase 2B catalytic subunit beta isoform	-0.247023	-2.6378	1.95497	0.166897
NCK1	P16333	P16333	NCK1_HUMAN	Cytoplasmic protein NCK1	-0.169997	-2.18429	1.47292	0.259844
GCFC2	P16383	P16383	GCFC2_HUMAN	Intron Large complex component GCFC2	-0.113498	-1.0156	0.502091	0.637773
H1-5	P16401	P16401	H15_HUMAN	Histone H1.5	1.34932	5.69824	6.19251	0.00107914
EPCAM	P16422	P16422	EPCAM_HUMAN	Epithelial cell adhesion molecule	-0.277795	-1.86263	1.16498	0.3452
POR	P16435	P16435	NCPR_HUMAN	NADPH--cytochrome P450 reductase	0.199732	1.55132	0.895741	0.443027
EPB42	P16452	P16452	EPB42_HUMAN	Protein 4.2	0.290906	0.844047	0.395058	0.702989
MGMT	P16455	P16455	MGMT_HUMAN	Methylated-DNA--protein-cysteine methyltransferase	-0.410651	-2.43481	1.73258	0.205437
FER	P16591	P16591	FER_HUMAN	Tyrosine-protein kinase Fer	-0.108715	-0.662488	0.291833	0.774019
ATP2A2	P16615	P16615	AT2A2_HUMAN	Sarcoplasmic/endoplasmic reticulum calcium ATPase 2	-0.0292027	-0.236326	0.089298	0.926888
PLCG2	P16885	P16885	PLCG2_HUMAN	1-phosphatidylinositol 4,5-bisphosphate phosphodiesterase gamma-2	-0.48717	-4.62483	4.5723	0.00922449
FAH	P16930	P16930	FAAA_HUMAN	Fumarylacetoacetase	-1.73783	-7.02289	8.25759	4.0404e-05
STMN1	P16949	P16949	STMN1_HUMAN	Stathmin	1.57336	4.55477	4.46988	0.0106448
YBX3	P16989	P16989	YBOX3_HUMAN	Y-box-binding protein 3	-0.0892215	-0.568616	0.242481	0.80691
ZNF22	P17026	P17026	ZNF22_HUMAN	Zinc finger protein 22	-0.441343	-2.9793	2.35168	0.113104
ZNF24	P17028	P17028	ZNF24_HUMAN	Zinc finger protein 24	-0.0605943	-0.438164	0.178385	0.857019
ZKSCAN1	P17029	P17029	ZKSC1_HUMAN	Zinc finger protein with KRAB and SCAN domains 1	-0.232517	-1.82987	1.13528	0.354586
ZNF26	P17031	P17031	ZNF26_HUMAN	Zinc finger protein 26	1.26253	2.68724	2.01069	0.157888
NAGA	P17050	P17050	NAGAB_HUMAN	Alpha-N-acetylgalactosaminidase	-0.308319	-1.38508	0.764023	0.50306
HSPA6	P17066	P48741;P17066	HSP76_HUMAN	Heat shock 70 kDa protein 6	-0.142182	-1.74382	1.05881	0.381123
HMGA1	P17096	P17096	HMGA1_HUMAN	High mobility group protein HMG-I/HMG-Y	0.105628	0.41357	0.16688	0.866557
TMEM11	P17152	P17152	TMM11_HUMAN	Transmembrane protein 11, mitochondrial	-0.10259	-0.775051	0.354617	0.730687
GOT1	P17174	P17174	AATC_HUMAN	Aspartate aminotransferase, cytoplasmic	0.0296907	0.238696	0.0902747	0.926385
PRKCA	P17252	P17252	KPCA_HUMAN	Protein kinase C alpha type	-0.924585	-4.50966	4.40422	0.0113778
ITGA2	P17301	P17301	ITA2_HUMAN	Integrin alpha-2	-0.172481	-0.971082	0.473426	0.654238
SMPD1	P17405	P17405	ASM_HUMAN	Sphingomyelin phosphodiesterase	-0.571316	-3.52304	3.03535	0.0561028
UBTF	P17480	P17480	UBF1_HUMAN	Nucleolar transcription factor 1	-0.0979492	-0.768235	0.350703	0.733691
HOXB4	P17483	P17483	HXB4_HUMAN	Homeobox protein Hox-B4	-2.31442	-3.3782	2.84751	0.0682252
HOXB6	P17509	P09630;P31267;P09067;P20719;P31274;P09629;P28356;Q00444;P17481;P31268;P31273;P17482;P17509	HXB6_HUMAN	Homeobox protein Hox-B6	-1.08393	-3.24244	2.6751	0.0817947
JUND	P17535	P17535	JUND_HUMAN	Transcription factor JunD	-0.178062	-1.48794	0.844518	0.466381
CKMT2	P17540	P17540	KCRS_HUMAN	Creatine kinase S-type, mitochondrial	-0.113559	-0.409747	0.165108	0.867692
ATF7	P17544	P17544	ATF7_HUMAN	Cyclic AMP-dependent transcription factor ATF-7	-0.0311015	-0.194268	0.0722431	0.940129
NDUFB7	P17568	P17568	NDUB7_HUMAN	NADH dehydrogenase [ubiquinone] 1 beta subcomplex subunit 7	-0.542609	-1.94726	1.24313	0.319894
PRKACA	P17612	P22694;P17612	KAPCA_HUMAN	cAMP-dependent protein kinase catalytic subunit alpha	-0.0555217	-0.538264	0.227104	0.819146
CAPN2	P17655	P17655	CAN2_HUMAN	Calpain-2 catalytic subunit	-0.892302	-4.9969	5.12417	0.00470429
DES	P17661	P17661	DESM_HUMAN	Desmin	-1.05221	-2.45779	1.75723	0.200453
CEBPB	P17676	P17676	CEBPB_HUMAN	CCAAT/enhancer-binding protein beta	-0.133217	-0.659152	0.290033	0.775305
HLA-G	P17693	P17693	HLAG_HUMAN	HLA class I histocompatibility antigen, alpha chain G	-0.014566	-0.0386503	0.0135314	0.987936
PTPN2	P17706	P17706	PTN2_HUMAN	Tyrosine-protein phosphatase non-receptor type 2	0.210984	1.5313	0.879434	0.449869
CTPS1	P17812	Q9NRF8;P17812	PYRG1_HUMAN	CTP synthase 1	0.538253	3.54692	3.06669	0.0541212
ENG	P17813	P17813	EGLN_HUMAN	Endoglin	-0.0891607	-0.302088	0.116999	0.906859
DDX5	P17844	P17844	DDX5_HUMAN	Probable ATP-dependent RNA helicase DDX5	0.318084	1.30099	0.700653	0.53188
PFKL	P17858	P08237;P17858	PFKAL_HUMAN	ATP-dependent 6-phosphofructokinase, liver type	-0.384134	-2.47309	1.77371	0.197272
GM2A	P17900	P17900	SAP3_HUMAN	Ganglioside GM2 activator	0.474297	2.53072	1.83636	0.186
LGALS3	P17931	P17931	LEG3_HUMAN	Galectin-3	-0.896323	-3.60145	3.13863	0.0505515
FLT1	P17948	P17948	VGFR1_HUMAN	Vascular endothelial growth factor receptor 1	-0.358234	-2.16485	1.45347	0.26421
PSMC3	P17980	P17980	PRS6A_HUMAN	26S proteasome regulatory subunit 6A	-0.102636	-1.15715	0.59738	0.583637
TCP1	P17987	P17987	TCPA_HUMAN	T-complex protein 1 subunit alpha	-0.35008	-3.13875	2.5459	0.092987
PTPN1	P18031	P18031	PTN1_HUMAN	Tyrosine-protein phosphatase non-receptor type 1	0.374843	1.8588	1.16149	0.346553
ERCC2	P18074	P18074	ERCC2_HUMAN	General transcription and DNA repair factor IIH helicase subunit XPD	-0.136342	-1.96312	1.25801	0.315798
RPL35A	P18077	P18077	RL35A_HUMAN	Large ribosomal subunit protein eL33	-0.162403	-1.57236	0.91302	0.435846
ITGB5	P18084	P18084	ITB5_HUMAN	Integrin beta-5	0.683024	3.09978	2.49793	0.0976962
ARF4	P18085	P18085	ARF4_HUMAN	ADP-ribosylation factor 4	0.139327	1.23689	0.653832	0.553927
RPL7	P18124	P18124	RL7_HUMAN	Large ribosomal subunit protein uL30	-0.0637345	-0.582008	0.249356	0.803336
VCL	P18206	P18206	VINC_HUMAN	Vinculin	-0.0874805	-0.601322	0.259367	0.796009
LBP	P18428	P18428	LBP_HUMAN	Lipopolysaccharide-binding protein	0.0948968	0.448545	0.183296	0.852582
PTPRA	P18433	P18433	PTPRA_HUMAN	Receptor-type tyrosine-protein phosphatase alpha	-0.178274	-1.55512	0.898851	0.441494
NAT1	P18440	P18440	ARY1_HUMAN	Arylamine N-acetyltransferase 1	-0.967059	-3.83017	3.4459	0.0354575
ITGB6	P18564	P18564	ITB6_HUMAN	Integrin beta-6	-0.0212427	-0.11125	0.04007	0.964272
SON	P18583	P18583	SON_HUMAN	Protein SON	-0.0373825	-0.39979	0.160513	0.870174
NELFE	P18615	P18615	NELFE_HUMAN	Negative elongation factor E	-0.0333932	-0.273569	0.10483	0.916662
RPL17	P18621	P18621	RL17_HUMAN	Large ribosomal subunit protein uL22	-0.0702972	-0.525701	0.220822	0.823757
PGAM1	P18669	P18669	PGAM1_HUMAN	Phosphoglycerate mutase 1	-0.0482908	-0.301147	0.116593	0.907094
RCC1	P18754	P18754	RCC1_HUMAN	Regulator of chromosome condensation	0.35303	2.26104	1.55067	0.242597
SDC1	P18827	P18827	SDC1_HUMAN	Syndecan-1	0.132382	0.413527	0.16686	0.866459
ATF6	P18850	P18850	ATF6A_HUMAN	Cyclic AMP-dependent transcription factor ATF-6 alpha	0.131833	0.991783	0.486677	0.64645
LIG1	P18858	P18858	DNLI1_HUMAN	DNA ligase 1	0.215683	1.43992	0.806531	0.485119
ATP5PF	P18859	P18859	ATP5J_HUMAN	ATP synthase-coupling factor 6, mitochondrial	0.00853737	0.0489734	0.0172153	0.985292
XRCC1	P18887	P18887	XRCC1_HUMAN	DNA repair protein XRCC1	-0.0203912	-0.161822	0.0594344	0.949468
PAM	P19021	P19021	AMD_HUMAN	Peptidyl-glycine alpha-amidating monooxygenase	-0.434701	-2.07882	1.36871	0.285291
CDH2	P19022	P19022	CADH2_HUMAN	Cadherin-2	-1.13612	-2.70946	2.03593	0.154595
GNAZ	P19086	P19086	GNAZ_HUMAN	Guanine nucleotide-binding protein G(z) subunit alpha	-0.710259	-2.63495	1.95177	0.167348
PLCG1	P19174	P19174	PLCG1_HUMAN	1-phosphatidylinositol 4,5-bisphosphate phosphodiesterase gamma-1	0.416141	2.41354	1.70988	0.21014
CD58	P19256	P19256	LFA3_HUMAN	Lymphocyte function-associated antigen 3	-0.0093029	-0.0295573	0.010311	0.990387
NCL	P19338	P19338	NUCL_HUMAN	Nucleolin	0.214632	1.59651	0.933013	0.428156
HK1	P19367	P19367	HXK1_HUMAN	Hexokinase-1	0.175324	1.19012	0.620477	0.571097
POLR2C	P19387	P19387	RPB3_HUMAN	DNA-directed RNA polymerase II subunit RPB3	-0.353787	-3.69711	3.26608	0.0437826
POLR2E	P19388	P19388	RPAB1_HUMAN	DNA-directed RNA polymerases I, II, and III subunit RPABC1	-0.164093	-1.48396	0.84135	0.467547
NDUFV2	P19404	P19404	NDUV2_HUMAN	NADH dehydrogenase [ubiquinone] flavoprotein 2, mitochondrial	-0.391714	-3.02549	2.40737	0.107139
ELK1	P19419	P19419	ELK1_HUMAN	ETS domain-containing protein Elk-1	-0.13492	-0.830465	0.386979	0.707867
GGT1	P19440	A6NGU5;P19440	GGT1_HUMAN	Glutathione hydrolase 1 proenzyme	-0.899021	-2.70322	2.02884	0.155501
ERCC3	P19447	P19447	ERCC3_HUMAN	General transcription and DNA repair factor IIH helicase subunit XPB	-0.0852782	-0.654306	0.287423	0.777048
TRIM21	P19474	P19474	RO52_HUMAN	E3 ubiquitin-protein ligase TRIM21	-0.62618	-4.64447	4.6011	0.00903136
EIF2AK2	P19525	P19525	E2AK2_HUMAN	Interferon-induced, double-stranded RNA-activated protein kinase	0.277807	1.97118	1.26559	0.314009
TFE3	P19532	P19532	TFE3_HUMAN	Transcription factor E3	-0.0669317	-0.467049	0.192131	0.846896
WT1	P19544	P19544	WT1_HUMAN	Wilms tumor protein	-0.231354	-0.829483	0.386397	0.708195
SRM	P19623	P19623	SPEE_HUMAN	Spermidine synthase	-0.0144238	-0.0808143	0.0287649	0.97332
SLC9A1	P19634	P19634	SL9A1_HUMAN	Sodium/hydrogen exchanger 1	-0.838949	-3.0874	2.48276	0.0994931
ORM2	P19652	P19652	A1AG2_HUMAN	Alpha-1-acid glycoprotein 2	-0.222832	-0.824041	0.383178	0.710424
CSNK2A2	P19784	P19784	CSK22_HUMAN	Casein kinase II subunit alpha'	-0.0713433	-0.77614	0.355244	0.730519
RXRA	P19793	P19793	RXRA_HUMAN	Retinoic acid receptor RXR-alpha	-0.443193	-3.19531	2.61611	0.0869351
ITIH2	P19823	P19823	ITIH2_HUMAN	Inter-alpha-trypsin inhibitor heavy chain H2	-0.00581399	-0.024134	0.00840102	0.99127
ITIH1	P19827	P19827	ITIH1_HUMAN	Inter-alpha-trypsin inhibitor heavy chain H1	-0.151331	-0.686448	0.304867	0.765296
NFKB1	P19838	P19838	NFKB1_HUMAN	Nuclear factor NF-kappa-B p105 subunit	-0.761487	-4.90452	4.986	0.00538809
TYMP	P19971	P19971	TYPH_HUMAN	Thymidine phosphorylase	-0.386012	-1.34056	0.730198	0.518028
ATP2B1	P20020	P20020	AT2B1_HUMAN	Plasma membrane calcium-transporting ATPase 1	-0.68792	-5.81647	6.37518	0.000828685
HLA-DPA1	P20036	P20036	DPA1_HUMAN	HLA class II histocompatibility antigen, DP alpha 1 chain	-1.03676	-2.46057	1.76021	0.20018
EIF2S2	P20042	P20042	IF2B_HUMAN	Eukaryotic translation initiation factor 2 subunit 2	0.290748	2.44828	1.747	0.202445
ANXA7	P20073	P20073	ANXA7_HUMAN	Annexin A7	-0.358964	-3.04223	2.42767	0.10487
AZU1	P20160	P20160	CAP7_HUMAN	Azurocidin	0.864251	1.85829	1.16102	0.346622
TBP	P20226	Q6SJ96;P20226	TBP_HUMAN	TATA-box-binding protein	-0.10766	-0.702563	0.313734	0.759706
TPSAB1;TPSB2	P20231;Q15661	Q15661;P20231	TRYB1_HUMAN;TRYB2_HUMAN	Tryptase beta-2	-0.197413	-0.539146	0.227547	0.818775
BTF3	P20290	P20290	BTF3_HUMAN	Transcription factor BTF3	-0.436966	-3.38983	2.86245	0.0670913
ALOX5AP	P20292	P20292	AL5AP_HUMAN	Arachidonate 5-lipoxygenase-activating protein	-1.23158	-2.58208	1.8929	0.175828
RAB4A	P20338	P20338	RAB4A_HUMAN	Ras-related protein Rab-4A	0.124903	0.787253	0.361661	0.726419
RAB5A	P20339	P20339	RAB5A_HUMAN	Ras-related protein Rab-5A	-0.0255928	-0.201116	0.0749853	0.938496
RAB6A	P20340	Q9NRW1;P20340;Q9H0N0	RAB6A_HUMAN	Ras-related protein Rab-6A	0.173298	1.25197	0.664734	0.547491
MSH3	P20585	P20585	MSH3_HUMAN	DNA mismatch repair protein Msh3	-0.113953	-1.63555	0.965718	0.4138
MX1	P20591	P20591	MX1_HUMAN	Interferon-induced GTP-binding protein Mx1	0.519089	1.25599	0.667645	0.546679
MX2	P20592	P20592	MX2_HUMAN	Interferon-induced GTP-binding protein Mx2	0.692382	2.03451	1.32586	0.296879
PSMB1	P20618	P20618	PSB1_HUMAN	Proteasome subunit beta type-1	-0.380538	-5.50618	5.89709	0.001675
M6PR	P20645	P20645	MPRD_HUMAN	Cation-dependent mannose-6-phosphate receptor	0.170402	1.29783	0.698317	0.532553
H2AC7	P20671	P0C0S8;P04908;Q6FI13;P20671;Q9BTM1;Q99878;Q7L7L0;Q93077;Q16777;Q96KK5	H2A1D_HUMAN	Histone H2A type 1-D	-0.3676	-3.02057	2.40142	0.107364
COX5A	P20674	P20674	COX5A_HUMAN	Cytochrome c oxidase subunit 5A, mitochondrial	-0.315784	-1.83478	1.13972	0.353205
LMNB1	P20700	P20700	LMNB1_HUMAN	Lamin-B1	-0.229695	-1.48549	0.842566	0.466964
ITGAL	P20701	P20701	ITAL_HUMAN	Integrin alpha-L	-0.269438	-0.95874	0.465589	0.658919
ITGAX	P20702	P20702	ITAX_HUMAN	Integrin alpha-X	-0.685523	-3.33552	2.79292	0.0722665
BCL3	P20749	P20749	BCL3_HUMAN	B-cell lymphoma 3 protein	-0.179363	-0.703977	0.314516	0.759113
OGN	P20774	P20774	MIME_HUMAN	Mimecan	-1.32094	-3.32798	2.78331	0.0729432
CAST	P20810	P20810	ICAL_HUMAN	Calpastatin	-0.91468	-6.15585	6.90223	0.000606742
IMPDH1	P20839	P20839	IMDH1_HUMAN	Inosine-5'-monophosphate dehydrogenase 1	0.609163	2.79413	2.13319	0.141011
COL5A1	P20908	P20908	CO5A1_HUMAN	Collagen alpha-1(V) chain	0.436445	0.959972	0.466369	0.658708
AGA	P20933	P20933	ASPG_HUMAN	N(4)-(beta-N-acetylglucosaminyl)-L-asparaginase	-0.130643	-0.667208	0.294387	0.772735
RASA1	P20936	P20936	RASA1_HUMAN	Ras GTPase-activating protein 1	-0.345548	-4.45213	4.3208	0.012642
PTMS	P20962	P20962	PTMS_HUMAN	Parathymosin	0.154266	0.897714	0.427546	0.681612
CDK11B	P21127	Q9UQ88;P21127	CD11B_HUMAN	Cyclin-dependent kinase 11B	0.167082	1.39127	0.768778	0.502291
GSTM3	P21266	P21266	GSTM3_HUMAN	Glutathione S-transferase Mu 3	0.133621	0.430652	0.174851	0.860002
ATP6V1B2	P21281	P21281	VATB2_HUMAN	V-type proton ATPase subunit B, brain isoform	-0.195123	-1.81783	1.12445	0.358555
ATP6V1C1	P21283	P21283	VATC1_HUMAN	V-type proton ATPase subunit C 1	-0.0457681	-0.368619	0.146321	0.883956
CSRP1	P21291	P21291	CSRP1_HUMAN	Cysteine and glycine-rich protein 1	-0.432428	-2.3716	1.66548	0.218106
