# Supplementary material for: Spatial proteomics of ovarian cancer precursors delineates early disease changes and drug targets
Source: Mol Syst Biol. 2025 Nov 13;22(1):7–41. doi: 10.1038/s44320-025-00168-4 (PMC12759074; doi:10.1038/s44320-025-00168-4)
Supplement: Supplementary file 24 — Dataset EV18 [file 44320_2025_168_MOESM24_ESM.xlsx]

## Sheet: Legend
Dataset EV18. Pathway enrichment analysis highlighting overrepresented pathways (Wikipathways) in STIC samples compared to secretory NFTE. Related to figure 6B.

## Sheet: Dataset EV18
C: Column	C: Type	C: Name	N: Size	N: Score	N: p-value	N: Benj. Hoch. FDR	N: Mean	N: Median
N: Student's T-test Test statistic STIC_Secretory epi	C: WikiPathway	WP_CHOLESTEROL_BIOSYNTHESIS_WITH_SKELETAL_DYSPLASIAS	6	0.742451	0.00164216	0.0315561	4.21828	4.62636
N: Student's T-test Test statistic STIC_Secretory epi	C: WikiPathway	WP_DNA_REPLICATION	23	0.596922	7.43886e-07	6.61129e-05	3.02634	4.3438
N: Student's T-test Test statistic STIC_Secretory epi	C: WikiPathway	WP_CHOLESTEROL_SYNTHESIS_DISORDERS	15	0.573107	0.000123067	0.00416668	2.7826	3.1676
N: Student's T-test Test statistic STIC_Secretory epi	C: WikiPathway	WP_EFFECT_OF_PROGERIN_ON_GENES_INVOLVED_IN_HUTCHINSONGILFORD_PROGERIA_SYNDROME	16	0.565335	9.16117e-05	0.00361866	2.63039	2.87666
N: Student's T-test Test statistic STIC_Secretory epi	C: WikiPathway	WP_TUMOR_SUPPRESSOR_ACTIVITY_OF_SMARCB1	19	0.506588	0.000134017	0.00433118	2.19882	2.16825
N: Student's T-test Test statistic STIC_Secretory epi	C: WikiPathway	WP_DNA_MISMATCH_REPAIR	17	0.472844	0.000745548	0.0189316	2.02729	2.58899
N: Student's T-test Test statistic STIC_Secretory epi	C: WikiPathway	WP_G1_TO_S_CELL_CYCLE_CONTROL	26	0.449963	7.30966e-05	0.00305716	2.33334	2.19078
N: Student's T-test Test statistic STIC_Secretory epi	C: WikiPathway	WP_RETINOBLASTOMA_GENE_IN_CANCER	42	0.414869	3.45104e-06	0.000223062	1.95645	2.7807
N: Student's T-test Test statistic STIC_Secretory epi	C: WikiPathway	WP_CHOLESTEROL_METABOLISM_WITH_BLOCH_AND_KANDUTSCHRUSSELL_PATHWAYS	26	0.335636	0.00309345	0.0478139	1.52233	1.34602
N: Student's T-test Test statistic STIC_Secretory epi	C: WikiPathway	WP_CHOLESTEROL_METABOLISM	43	0.321686	0.000270874	0.00740737	1.34022	1.41028
N: Student's T-test Test statistic STIC_Secretory epi	C: WikiPathway	WP_MRNA_PROCESSING	117	0.263916	9.54184e-07	7.53806e-05	0.831715	0.805313
N: Student's T-test Test statistic STIC_Secretory epi	C: WikiPathway	WP_7Q1123_COPY_NUMBER_VARIATION_SYNDROME	60	0.242605	0.00119494	0.0274066	0.949559	1.54456
N: Student's T-test Test statistic STIC_Secretory epi	C: WikiPathway	WP_CELL_CYCLE	57	0.237857	0.00195532	0.0347559	0.937704	0.980582
N: Student's T-test Test statistic STIC_Secretory epi	C: WikiPathway	WP_ALZHEIMERS_DISEASE	145	-0.153895	0.00150007	0.0304728	-1.34427	-1.56514
N: Student's T-test Test statistic STIC_Secretory epi	C: WikiPathway	WP_ALZHEIMERS_DISEASE_AND_MIRNA_EFFECTS	145	-0.153895	0.00150007	0.0313691	-1.34427	-1.56514
N: Student's T-test Test statistic STIC_Secretory epi	C: WikiPathway	WP_CILIARY_LANDSCAPE	154	-0.175997	0.00018473	0.00571058	-2.01995	-1.11572
N: Student's T-test Test statistic STIC_Secretory epi	C: WikiPathway	WP_FOCAL_ADHESION	98	-0.18642	0.00150974	0.0298173	-1.41887	-1.74624
N: Student's T-test Test statistic STIC_Secretory epi	C: WikiPathway	WP_MAPK_SIGNALING_PATHWAY	98	-0.250757	1.97418e-05	0.000935764	-1.67881	-1.75096
N: Student's T-test Test statistic STIC_Secretory epi	C: WikiPathway	WP_RAS_SIGNALING	72	-0.251843	0.000232173	0.006603	-1.77331	-2.04782
N: Student's T-test Test statistic STIC_Secretory epi	C: WikiPathway	WP_MICRORNAS_IN_CARDIOMYOCYTE_HYPERTROPHY	46	-0.260615	0.00228224	0.0368789	-1.86311	-1.93058
N: Student's T-test Test statistic STIC_Secretory epi	C: WikiPathway	WP_NONALCOHOLIC_FATTY_LIVER_DISEASE	92	-0.27064	8.00745e-06	0.000474441	-1.71835	-2.07877
N: Student's T-test Test statistic STIC_Secretory epi	C: WikiPathway	WP_16P112_PROXIMAL_DELETION_SYNDROME	49	-0.276011	0.000856143	0.0209903	-1.80113	-2.41521
N: Student's T-test Test statistic STIC_Secretory epi	C: WikiPathway	WP_METAPATHWAY_BIOTRANSFORMATION_PHASE_I_AND_II	40	-0.290839	0.00149192	0.0321442	-2.2717	-2.69402
N: Student's T-test Test statistic STIC_Secretory epi	C: WikiPathway	WP_TRANSSULFURATION_ONECARBON_METABOLISM_AND_RELATED_PATHWAYS	37	-0.298847	0.00169162	0.0316511	-2.16008	-2.49898
N: Student's T-test Test statistic STIC_Secretory epi	C: WikiPathway	WP_WNT_SIGNALING_PATHWAY_AND_PLURIPOTENCY	33	-0.304576	0.00250434	0.0395686	-2.2251	-2.82671
N: Student's T-test Test statistic STIC_Secretory epi	C: WikiPathway	WP_MITOCHONDRIAL_COMPLEX_I_ASSEMBLY_MODEL_OXPHOS_SYSTEM	48	-0.32405	0.000106888	0.00399984	-2.04691	-2.41655
N: Student's T-test Test statistic STIC_Secretory epi	C: WikiPathway	WP_WNT_SIGNALING_PATHWAY	27	-0.328042	0.00321688	0.0486639	-2.33131	-2.80543
N: Student's T-test Test statistic STIC_Secretory epi	C: WikiPathway	WP_G_PROTEIN_SIGNALING_PATHWAYS	40	-0.351887	0.000121565	0.00432165	-2.78255	-2.65261
N: Student's T-test Test statistic STIC_Secretory epi	C: WikiPathway	WP_PROTEASOME_DEGRADATION	53	-0.386873	1.18194e-06	8.40357e-05	-2.47802	-2.12102
N: Student's T-test Test statistic STIC_Secretory epi	C: WikiPathway	WP_VASOPRESSINREGULATED_WATER_REABSORPTION	23	-0.395759	0.00103239	0.0244677	-2.53931	-2.51843
N: Student's T-test Test statistic STIC_Secretory epi	C: WikiPathway	WP_HIPPO_SIGNALING_REGULATION_PATHWAYS	38	-0.405011	1.61956e-05	0.000822504	-2.96905	-3.41704
N: Student's T-test Test statistic STIC_Secretory epi	C: WikiPathway	WP_ELECTRON_TRANSPORT_CHAIN_OXPHOS_SYSTEM_IN_MITOCHONDRIA	64	-0.409768	1.60097e-08	1.62613e-06	-2.3446	-2.46013
N: Student's T-test Test statistic STIC_Secretory epi	C: WikiPathway	WP_NUCLEOTIDEBINDING_OLIGOMERIZATION_DOMAIN_NOD_PATHWAY	23	-0.412293	0.00062934	0.0165726	-2.78638	-2.06698
N: Student's T-test Test statistic STIC_Secretory epi	C: WikiPathway	WP_HEDGEHOG_SIGNALING_PATHWAY_WP4249	13	-0.470705	0.00331952	0.0491704	-2.79687	-2.80543
N: Student's T-test Test statistic STIC_Secretory epi	C: WikiPathway	WP_PROSTAGLANDIN_AND_LEUKOTRIENE_METABOLISM_IN_SENESCENCE	14	-0.47737	0.00199986	0.0346805	-3.258	-3.10932
N: Student's T-test Test statistic STIC_Secretory epi	C: WikiPathway	WP_OXIDATIVE_PHOSPHORYLATION	39	-0.527559	1.27481e-08	1.51065e-06	-3.05589	-3.07894
N: Student's T-test Test statistic STIC_Secretory epi	C: WikiPathway	WP_OXIDATIVE_STRESS_RESPONSE	16	-0.533152	0.000225038	0.00666674	-3.54336	-3.62808
N: Student's T-test Test statistic STIC_Secretory epi	C: WikiPathway	WP_ALSTROM_SYNDROME	23	-0.533773	9.60304e-06	0.000525213	-4.06125	-2.79554
N: Student's T-test Test statistic STIC_Secretory epi	C: WikiPathway	WP_PROSTAGLANDIN_SYNTHESIS_AND_REGULATION	18	-0.55675	4.3988e-05	0.00195472	-3.82293	-3.63404
N: Student's T-test Test statistic STIC_Secretory epi	C: WikiPathway	WP_JOUBERT_SYNDROME	38	-0.602151	1.45018e-10	2.57769e-08	-4.92821	-5.70109
N: Student's T-test Test statistic STIC_Secretory epi	C: WikiPathway	WP_EXTRACELLULAR_VESICLES_IN_THE_CROSSTALK_OF_CARDIAC_CELLS	9	-0.603485	0.00172757	0.0314948	-3.98154	-3.57951
N: Student's T-test Test statistic STIC_Secretory epi	C: WikiPathway	WP_TYPE_II_DIABETES_MELLITUS	9	-0.614846	0.0014107	0.0313439	-4.16346	-4.42375
N: Student's T-test Test statistic STIC_Secretory epi	C: WikiPathway	WP_15Q112_COPY_NUMBER_VARIATION_SYNDROME	7	-0.667071	0.00224998	0.0372031	-5.11135	-5.58982
N: Student's T-test Test statistic STIC_Secretory epi	C: WikiPathway	WP_CILIOPATHIES	60	-0.782773	1.40154e-25	9.96494e-23	-6.7331	-7.15084
N: Student's T-test Test statistic STIC_Secretory epi	C: WikiPathway	WP_LEPTININSULIN_SIGNALING_OVERLAP	5	-0.798242	0.00200023	0.033861	-5.62436	-6.18167
N: Student's T-test Test statistic STIC_Secretory epi	C: WikiPathway	WP_BARDETBIEDL_SYNDROME	38	-0.822156	2.08295e-18	4.93658e-16	-7.35218	-7.95364
N: Student's T-test Test statistic STIC_Secretory epi	C: WikiPathway	WP_GENES_RELATED_TO_PRIMARY_CILIUM_DEVELOPMENT_BASED_ON_CRISPR	51	-0.82852	1.81657e-24	6.45791e-22	-7.24781	-7.76419
N: Student's T-test Test statistic STIC_Secretory epi	C: WikiPathway	WP_INTRAFLAGELLAR_TRANSPORT_PROTEINS_BINDING_TO_DYNEIN	17	-0.845905	1.61068e-09	2.29038e-07	-7.24407	-7.19674
