# Supplementary material for: Spatial proteomics of ovarian cancer precursors delineates early disease changes and drug targets
Source: Mol Syst Biol. 2025 Nov 13;22(1):7–41. doi: 10.1038/s44320-025-00168-4 (PMC12759074; doi:10.1038/s44320-025-00168-4)
Supplement: Supplementary file 25 — Dataset EV19 [file 44320_2025_168_MOESM25_ESM.xlsx]

## Sheet: Legend
Dataset EV19. ANOVA-significant proteins showing pathways significantly affected by disease progression stage and molecular subtype. Related to figure 6D.

## Sheet: Dataset EV19
Normal fallopian tube epithelium	STIC	Invasive carcinoma	Type	ANOVA Significant (progression)	ANOVA Significant (subtype)	Student's T-test Significant STIC_epi	Student's T-test significant	Selection	ANOVA p-value progression (-log10)	ANOVA q-value	ANOVA p-value subtype (-log10)	ANOVA q-value_	-Log Student's T-test p-value STIC_epi	Student's T-test q-value STIC_epi	Student's T-test Difference STIC_epi	Student's T-test Test statistic STIC_epi	Name
1.35228	-0.255297	-0.338132	WikiPathway	+	+	+	STIC_epi	+	13.6592	0	2.07182	0.0489057	9.84053	0	-0.819961	-8.03979	WP_CILIOPATHIES
1.30141	-0.253639	-0.268826	WikiPathway	+	+	+	STIC_epi	+	10.8122	0	2.1926	0.0464545	8.02056	0	-0.598192	-6.8714	WP_BARDETBIEDL_SYNDROME
1.18253	-0.14202	-0.374554	WikiPathway	+	+	+	STIC_epi	+	9.29674	0	2.4352	0.0318889	7.30773	0	-0.454064	-6.41572	WP_JOUBERT_SYNDROME
1.25056	-0.174712	-0.326988	WikiPathway	+		+	STIC_epi	+	9.28164	0	1.4443	0.13357	7.4211	0	-0.511902	-6.48826	WP_GENES_RELATED_TO_PRIMARY_CILIUM_DEVELOPMENT_BASED_ON_CRISPR
1.25151	0.0739822	-0.562632	WikiPathway	+		+	STIC_epi	+	8.82551	0	0.374304	0.62295	6.40212	0.0008	-0.437638	-5.83388	WP_NUCLEAR_RECEPTORS
-1.23481	-0.0431796	0.456529	WikiPathway	+		+	STIC_epi	+	8.56992	0	0.184243	0.774442	5.53091	0.003	0.404771	5.26631	WP_GLYCOLYSIS_AND_GLUCONEOGENESIS
-1.43266	0.105458	0.520952	Hallmark	+		+	STIC_epi	+	8.53167	0	0.270849	0.696836	5.79242	0.00171429	0.255828	5.43783	HALLMARK_UV_RESPONSE_UP
-1.13788	-0.0699902	0.432538	WikiPathway	+		+	STIC_epi	+	7.8048	0	0.0372842	0.957249	6.28672	0.000666667	0.45777	5.75926	WP_TYPE_I_COLLAGEN_SYNTHESIS_IN_THE_CONTEXT_OF_OSTEOGENESIS_IMPERFECTA
1.143	-0.0293826	-0.474849	WikiPathway	+		+	STIC_epi	+	7.52049	0	1.4559	0.131846	4.3707	0.01675	-0.551965	-4.48657	WP_OXIDATIVE_STRESS_RESPONSE
-0.858903	-0.203843	0.68788	Hallmark	+				+	6.90759	0	0.075113	0.9118	2.18913	0.12832	0.132932	2.84218	HALLMARK_MTORC1_SIGNALING
-0.985287	0.0711464	0.263758	WikiPathway	+		+	STIC_epi	+	6.68285	0	0.0483924	0.945241	4.79479	0.0101818	0.520648	4.77587	WP_MEVALONATE_ARM_OF_CHOLESTEROL_BIOSYNTHESIS_PATHWAY
-1.2115	-0.0213426	0.312769	WikiPathway	+		+	STIC_epi	+	6.62172	0	0.0602317	0.928772	4.42687	0.0154667	0.722611	4.52524	WP_PHOTODYNAMIC_THERAPYINDUCED_UNFOLDED_PROTEIN_RESPONSE
-1.09018	0.116996	0.448972	Hallmark	+		+	STIC_epi	+	6.40021	0	0.201698	0.755021	5.18982	0.00666667	0.287869	5.04063	HALLMARK_PEROXISOME
-1.14606	0.198354	0.255519	WikiPathway	+		+	STIC_epi	+	5.73395	0	0.378066	0.626253	4.35813	0.0157647	0.456346	4.47791	WP_PHOTODYNAMIC_THERAPYINDUCED_HIF1_SURVIVAL_SIGNALING
-1.39696	0.381341	0.398043	WikiPathway	+		+	STIC_epi	+	5.65473	0	1.19976	0.201364	4.5341	0.0142857	0.315007	4.59874	WP_SPINAL_CORD_INJURY
-1.33982	0.139011	0.259533	WikiPathway	+		+	STIC_epi	+	5.55954	0	0.0365857	0.954233	4.72562	0.0106667	0.600807	4.72907	WP_UREA_CYCLE_AND_ASSOCIATED_PATHWAYS
-1.06672	0.0413483	0.399586	Hallmark	+		+	STIC_epi	+	5.44333	0	1.89736	0.0638644	4.05457	0.0192	0.356417	4.26669	HALLMARK_E2F_TARGETS
-0.830383	-0.0220143	0.504268	WikiPathway	+				+	5.30299	0.000444444	0.125845	0.847508	2.10435	0.143059	0.0671977	2.76918	WP_VEGFAVEGFR2_SIGNALING
-0.884426	-0.0689312	0.430643	WikiPathway	+		+	STIC_epi	+	5.27139	0.000421053	0.398168	0.61426	3.83848	0.02096	0.178492	4.11391	WP_7Q1123_COPY_NUMBER_VARIATION_SYNDROME
1.1688	-0.155372	-0.458699	WikiPathway	+		+	STIC_epi	+	5.16707	0.0008	0.0806176	0.906432	4.28926	0.0164444	-0.265613	-4.43031	WP_TRANSSULFURATION_ONECARBON_METABOLISM_AND_RELATED_PATHWAYS
-0.646408	-0.169663	0.370099	WikiPathway	+				+	5.11842	0.000761905	0.2601	0.6998	2.40215	0.109953	0.284366	3.02118	WP_PTDINS45P2_IN_CYTOKINESIS_PATHWAY
-0.933818	0.0234796	0.55161	WikiPathway	+		+	STIC_epi	+	5.0057	0.000727273	1.0694	0.235354	3.33214	0.0413333	0.596968	3.74624	WP_GASTRIC_CANCER_NETWORK_1
-1.2073	0.25736	0.413378	WikiPathway	+		+	STIC_epi	+	4.80131	0.000695652	1.61071	0.100056	3.88136	0.0193333	0.315253	4.1444	WP_CHOLESTEROL_METABOLISM
-1.04818	0.0849547	0.205755	WikiPathway	+		+	STIC_epi	+	4.57995	0.00116667	0.647602	0.426667	4.18049	0.0170526	0.343189	4.35476	WP_CHOLESTEROL_METABOLISM_WITH_BLOCH_AND_KANDUTSCHRUSSELL_PATHWAYS
0.652932	-0.344445	-0.286703	WikiPathway	+		+	STIC_epi	+	4.42598	0.00112	0.361138	0.628074	4.84569	0.0096	-0.393166	-4.81022	WP_INTRAFLAGELLAR_TRANSPORT_PROTEINS_BINDING_TO_DYNEIN
-0.596053	-0.0681216	0.259266	WikiPathway	+				+	4.33823	0.00138462	0.44547	0.57827	1.34358	0.306133	0.135891	2.05289	WP_TRANSLATION_FACTORS
-0.973487	-0.0220426	0.44102	Hallmark	+		+	STIC_epi	+	4.32895	0.00133333	1.82039	0.0731148	3.51381	0.0335385	0.330214	3.87988	HALLMARK_G2M_CHECKPOINT
-0.709529	-0.0701815	0.303214	WikiPathway	+				+	4.27143	0.00128571	0.409625	0.610013	2.27339	0.124348	0.325295	2.91371	WP_GLUCOSE_METABOLISM_IN_TRIPLENEGATIVE_BREAST_CANCER_CELLS
-0.771429	0.0451326	0.607882	WikiPathway	+				+	4.17664	0.00137931	0.228211	0.73423	2.20435	0.128653	0.0895801	2.85518	WP_ALZHEIMERS_DISEASE
-0.902662	0.106203	0.475808	WikiPathway	+				+	4.15174	0.00133333	0.567036	0.481072	2.67432	0.0884571	0.332415	3.24182	WP_RETINOBLASTOMA_GENE_IN_CANCER
-0.867407	0.336355	0.142209	WikiPathway	+		+	STIC_epi	+	4.12467	0.00141935	0.679164	0.408279	4.59782	0.0129231	0.638761	4.64223	WP_CHOLESTEROL_BIOSYNTHESIS_WITH_SKELETAL_DYSPLASIAS
-0.00371679	-0.54596	0.414874	WikiPathway	+				+	4.02744	0.00175	1.53668	0.118027	0.285878	0.745515	-0.0716456	-0.651429	WP_AEROBIC_GLYCOLYSIS
-0.951883	0.132386	0.0351164	WikiPathway	+		+	STIC_epi	+	3.97886	0.00193939	0.646972	0.42418	3.9672	0.0207619	0.483436	4.20517	WP_CHOLESTEROL_SYNTHESIS_DISORDERS
-0.814186	-0.0194688	0.236436	WikiPathway	+				+	3.92979	0.00188235	0.556575	0.488115	1.76763	0.182269	0.172462	2.46745	WP_NSP1_FROM_SARSCOV2_INHIBITS_TRANSLATION_INITIATION_IN_THE_HOST_CELL
-0.333441	-0.295588	0.535656	WikiPathway	+				+	3.90364	0.00182857	1.24139	0.188977	0.273133	0.757553	0.0644596	0.627524	WP_CORI_CYCLE
-0.670693	-0.0559068	0.41268	Hallmark	+				+	3.89593	0.00177778	0.874039	0.297085	1.39542	0.29074	0.135363	2.10615	HALLMARK_MYC_TARGETS_V1
-0.734769	-0.089903	0.506333	WikiPathway	+				+	3.86911	0.00194595	0.117584	0.857408	2.50673	0.10359	0.280018	3.10695	WP_METABOLIC_REPROGRAMMING_IN_COLON_CANCER
-0.872845	0.237944	-0.0469013	WikiPathway	+		+	STIC_epi	+	3.84156	0.00189474	0.36055	0.625049	3.88915	0.0201739	0.468227	4.14993	WP_CHOLESTEROL_BIOSYNTHESIS_PATHWAY
-0.821739	-0.0280413	0.334188	WikiPathway	+				+	3.71164	0.0025641	0.433175	0.588268	2.95946	0.0648	0.268764	3.46488	WP_METABOLIC_REPROGRAMMING_IN_PANCREATIC_CANCER
0.701511	0.00326057	-0.382021	WikiPathway	+				+	3.69397	0.0026	0.315306	0.663271	1.93871	0.153226	-0.342741	-2.62327	WP_FLUOROACETIC_ACID_TOXICITY
0.534516	0.122137	-0.325424	Hallmark	+				+	3.34386	0.00546342	0.390967	0.620903	2.58086	0.0958919	-0.157059	-3.16697	HALLMARK_ESTROGEN_RESPONSE_LATE
-0.587273	0.107894	0.224836	WikiPathway	+				+	3.32121	0.00571429	1.15089	0.206526	2.03377	0.142175	0.246797	2.70756	WP_NAD_METABOLISM_IN_ONCOGENEINDUCED_SENESCENCE_AND_MITOCHONDRIAL_DYSFUNCTIONASSOCIATED_SENESCENCE
-0.89393	-0.0245014	0.291612	WikiPathway	+				+	3.1911	0.00734884	0.752791	0.360928	2.80985	0.077375	0.161665	3.34878	WP_GASTRIC_CANCER_NETWORK_2
-0.952539	-0.121588	0.320959	Hallmark	+				+	3.1323	0.00790909	1.0897	0.228041	2.35702	0.113818	0.142272	2.98375	HALLMARK_MITOTIC_SPINDLE
-0.770937	0.144305	0.228345	WikiPathway	+	+			+	3.11209	0.008	4.01329	0.0018	2.51136	0.105263	0.347884	3.11071	WP_DNA_REPLICATION
-0.635234	-0.0503778	-0.0109376	WikiPathway	+				+	3.10115	0.00808696	0.189189	0.77037	2.80362	0.0756364	0.242019	3.34391	WP_CCL18_SIGNALING_PATHWAY
0.729868	-0.0219042	-0.201933	WikiPathway	+				+	3.0984	0.00808511	0.279023	0.696851	2.05947	0.145037	-1.22647	-2.73009	WP_GLUCOCORTICOID_BIOSYNTHESIS
0.859118	-0.326733	0.0901029	WikiPathway	+		+	STIC_epi	+	3.08514	0.00825	0.294684	0.683651	3.94651	0.0198182	-0.221522	-4.19056	WP_IL9_SIGNALING_PATHWAY
-0.429457	-0.340009	0.55622	WikiPathway	+				+	2.96932	0.00955102	0.905478	0.288632	0.521373	0.628328	0.106066	1.04501	WP_GLYCOLYSIS_IN_SENESCENCE
1.01811	-0.0300204	-0.278335	WikiPathway	+				+	2.95093	0.00984	0.548748	0.493286	2.60837	0.0941111	-0.616428	-3.1891	WP_PROSTAGLANDIN_SYNTHESIS_AND_REGULATION
-0.908399	0.157294	0.60009	WikiPathway	+	+			+	2.75559	0.0141961	2.16623	0.0477333	2.34098	0.113689	0.164017	2.97039	WP_CELL_CYCLE
0.182807	-0.434828	0.39212	WikiPathway	+				+	2.63657	0.0172308	1.40272	0.142716	0.585059	0.612935	-0.145733	-1.13936	WP_HIF1A_AND_PPARG_REGULATION_OF_GLYCOLYSIS
0.865804	-0.301716	-0.0785699	WikiPathway	+	+			+	2.60609	0.0178113	2.12617	0.04632	2.76509	0.0785882	-0.264962	-3.31366	WP_GLYCEROPHOSPHOLIPID_BIOSYNTHETIC_PATHWAY
-0.139725	-0.495617	0.510368	WikiPathway	+				+	2.56143	0.0185926	0.267784	0.697348	0.13856	0.848373	-0.0291	-0.351297	WP_CYTOPLASMIC_RIBOSOMAL_PROTEINS
-0.704776	-0.111743	0.281007	WikiPathway	+	+			+	2.54981	0.0185455	3.09755	0.00769231	2.10105	0.140769	0.148319	2.76632	WP_DNA_IRDAMAGE_AND_CELLULAR_RESPONSE_VIA_ATR
-0.395696	-0.502799	0.50689	WikiPathway	+				+	2.52398	0.0187857	0.966488	0.267229	0.080895	0.903045	0.0220562	0.215761	WP_PROXIMAL_TUBULE_TRANSPORT
0.856655	-0.254207	-0.172599	WikiPathway	+				+	2.48059	0.0204211	0.617391	0.439206	2.44722	0.106732	-0.224712	-3.0583	WP_CALCIUM_REGULATION_IN_CARDIAC_CELLS
-0.849129	0.0179632	-0.0385499	Hallmark	+		+	STIC_epi	+	2.44611	0.0215172	0.368282	0.626882	3.19312	0.0471724	0.135227	3.64249	HALLMARK_HEME_METABOLISM
-0.707965	0.272118	0.19708	WikiPathway	+		+	STIC_epi	+	2.34627	0.0261017	0.949675	0.268536	3.3013	0.042	0.263952	3.72334	WP_PATHOGENIC_ESCHERICHIA_COLI_INFECTION
-0.0630906	-0.233406	0.445441	WikiPathway	+				+	2.33689	0.026	1.48358	0.131405	0.0161556	0.974	-0.00235975	-0.0460121	WP_PROTEASOME_DEGRADATION
0.783993	-0.0881046	-0.389196	WikiPathway	+	+			+	2.27782	0.0291803	4.45293	0.00106667	2.06053	0.147396	-0.183739	-2.73102	WP_16P112_PROXIMAL_DELETION_SYNDROME
0.842162	0.118566	-0.0597234	WikiPathway	+	+			+	2.19831	0.0330968	2.13288	0.0470204	2.42487	0.108095	-0.326044	-3.03992	WP_DOPAMINE_METABOLISM
0.563456	-0.368973	0.290525	WikiPathway	+				+	2.18685	0.0330794	0.955478	0.267856	1.94245	0.154623	-0.105758	-2.62662	WP_REGULATION_OF_ACTIN_CYTOSKELETON
0.63196	-0.0184715	-0.118351	WikiPathway	+				+	2.17877	0.0331875	0.2872	0.69052	2.23052	0.129702	-0.139015	-2.87745	WP_EMBRYONIC_STEM_CELL_PLURIPOTENCY_PATHWAYS
0.614696	-0.112551	0.0340904	WikiPathway	+				+	2.17583	0.0328615	0.217626	0.742335	2.87348	0.0729032	-0.278482	-3.39841	WP_ARRHYTHMOGENIC_RIGHT_VENTRICULAR_CARDIOMYOPATHY
-0.194927	-0.353748	0.380488	WikiPathway	+				+	2.08552	0.0384848	0.0611401	0.931801	0.57214	0.611181	-0.0939764	-1.12056	WP_PURINE_METABOLISM_AND_RELATED_DISORDERS
0.351716	0.0829187	-0.370841	WikiPathway	+				+	2.04483	0.0409552	1.96946	0.0577857	1.72542	0.187942	-0.124848	-2.42811	WP_THYROID_STIMULATING_HORMONE_TSH_SIGNALING_PATHWAY
-0.390012	-0.241803	0.263661	Hallmark	+				+	2.02225	0.0421176	0.109551	0.861374	0.827537	0.506455	0.0618238	1.46658	HALLMARK_PI3K_AKT_MTOR_SIGNALING
0.766399	-0.218362	-0.158092	WikiPathway	+	+			+	2.01367	0.042087	2.7761	0.0181429	2.45974	0.1078	-0.165578	-3.06857	WP_PHOSPHOINOSITIDES_METABOLISM
-0.42972	0.347615	0.197131	WikiPathway	+				+	1.94461	0.0474286	1.1523	0.207745	1.79761	0.179815	0.10159	2.49516	WP_IL18_SIGNALING_PATHWAY
0.645223	-0.0580469	-0.323618	WikiPathway	+				+	1.92374	0.0489014	0.676378	0.4076	1.21378	0.35115	-0.190057	-1.91574	WP_ARSENIC_METABOLISM_AND_REACTIVE_OXYGEN_SPECIES_GENERATION
0.491379	-0.087638	-0.227537	WikiPathway		+			+	1.68655	0.0744103	2.31815	0.0373	1.34826	0.307189	-0.381162	-2.05774	WP_MIRNA_TARGETS_IN_ECM_AND_MEMBRANE_RECEPTORS
-0.321603	-0.0521872	0.257839	WikiPathway		+			+	1.62052	0.0816098	4.12729	0.00117647	0.638037	0.593983	0.0580232	1.21486	WP_APOPTOSISRELATED_NETWORK_DUE_TO_ALTERED_NOTCH3_IN_OVARIAN_CANCER
0.407546	0.148542	-0.257684	Hallmark		+			+	1.61271	0.0821205	4.19899	0.00125	1.21469	0.354734	-0.128467	-1.91672	HALLMARK_XENOBIOTIC_METABOLISM
-0.460839	-0.0487479	0.128453	WikiPathway		+			+	1.54539	0.0906977	2.14031	0.0477447	0.585009	0.608096	0.0572392	1.13929	WP_TCELL_RECEPTOR_SIGNALING_PATHWAY
0.535505	-0.0839679	-0.148069	WikiPathway		+			+	1.23467	0.157811	2.21869	0.0453333	1.65079	0.206629	-0.418738	-2.35763	WP_BENZOAPYRENE_METABOLISM
-0.122599	0.0100793	0.509855	Hallmark		+			+	1.05246	0.222898	6.67168	0	0.355808	0.703497	0.0350592	0.77712	HALLMARK_APOPTOSIS
0.408512	-0.136694	0.469009	WikiPathway		+			+	0.921125	0.278438	7.34518	0	2.05055	0.141714	-0.232776	-2.72229	WP_MICROGLIA_PATHOGEN_PHAGOCYTOSIS_PATHWAY
-0.145345	-0.166119	0.484243	Hallmark		+			+	0.911643	0.280792	7.06919	0	0.31087	0.735439	0.0468056	0.697375	HALLMARK_INFLAMMATORY_RESPONSE
0.206483	0.0434064	-0.0813861	WikiPathway		+			+	0.838575	0.313891	4.80929	0	0.487199	0.643108	-0.0751742	-0.992593	WP_SELENIUM_MICRONUTRIENT_NETWORK
0.425557	-0.23526	-0.205075	WikiPathway		+			+	0.829185	0.317261	2.68973	0.0205333	1.22108	0.356051	-0.151327	-1.92361	WP_AIRWAY_SMOOTH_MUSCLE_CELL_CONTRACTION
0.144681	-0.133595	0.362665	Hallmark		+			+	0.810858	0.326821	2.2731	0.0407805	0.784776	0.532505	-0.0449294	-1.412	HALLMARK_DNA_REPAIR
-0.274205	-0.142223	-0.179862	WikiPathway		+			+	0.708535	0.384915	2.19794	0.0467907	0.541641	0.616758	0.0624693	1.07549	WP_DNA_REPAIR_PATHWAYS_FULL_NETWORK
-0.379092	0.00876138	0.201284	Hallmark		+			+	0.691597	0.395261	2.76935	0.0176552	0.719873	0.544393	0.0775722	1.3268	HALLMARK_ANDROGEN_RESPONSE
-0.487315	0.139675	-0.140769	WikiPathway		+			+	0.571407	0.474791	2.05939	0.0495556	0.909309	0.474358	0.180039	1.56785	WP_FATTY_ACID_BETAOXIDATION
0.264302	-0.0569313	0.156873	Cell type		+			+	0.552028	0.485802	6.45976	0	1.16574	0.367415	-0.283009	-1.86346	Cell type:Myeloid.cell
0.15039	0.0181456	0.390872	WikiPathway		+			+	0.517867	0.51009	7.66346	0	1.17337	0.368494	-0.179484	-1.87182	WP_TYROBP_CAUSAL_NETWORK_IN_MICROGLIA
0.32678	0.0823399	-0.0797337	WikiPathway		+			+	0.501042	0.521029	2.54595	0.0268235	0.626734	0.595126	-0.0800052	-1.19897	WP_COMMON_PATHWAYS_UNDERLYING_DRUG_ADDICTION
0.0609277	-0.307356	0.400914	Hallmark		+			+	0.492773	0.526365	5.19881	0	0.388964	0.685896	-0.045514	-0.833811	HALLMARK_TNFA_SIGNALING_VIA_NFKB
-0.151609	0.34246	-0.327699	WikiPathway		+			+	0.482562	0.534261	2.32281	0.0379487	0.401885	0.674745	0.0379504	0.855449	WP_NUCLEAR_RECEPTORS_METAPATHWAY
0.0208856	0.0352005	-0.337125	WikiPathway		+			+	0.476668	0.537525	2.68876	0.019871	0.519803	0.621059	-0.0930559	-1.04264	WP_VITAMIN_B12_METABOLISM
0.131177	0.00790916	0.159609	Hallmark		+			+	0.463054	0.53958	8.90743	0	0.757821	0.522473	-0.142044	-1.37698	HALLMARK_INTERFERON_ALPHA_RESPONSE
-0.283054	-0.0321755	0.147781	WikiPathway		+			+	0.451194	0.544469	2.16409	0.0470435	0.88347	0.47402	0.0946074	1.53627	WP_EUKARYOTIC_TRANSCRIPTION_INITIATION
-0.466598	0.0690619	0.215671	Hallmark		+			+	0.421567	0.55968	2.37696	0.0343158	0.20854	0.829885	0.0554769	0.500854	HALLMARK_EPITHELIAL_MESENCHYMAL_TRANSITION
-0.181694	0.165782	0.238725	WikiPathway		+			+	0.413812	0.565483	2.11051	0.0465882	0.713579	0.545168	0.0799909	1.31838	WP_NEPHROTIC_SYNDROME
-0.360009	-0.157155	0.0673147	WikiPathway		+			+	0.393895	0.583007	2.4218	0.0318919	0.42923	0.666622	0.0611656	0.900455	WP_HISTONE_MODIFICATIONS
0.23265	0.0636149	-0.0841979	Cell type		+			+	0.337637	0.640255	2.68737	0.01925	0.636298	0.590712	-0.275029	-1.21242	Cell type:Fibroblasts
-0.199771	0.0112992	0.421116	WikiPathway		+			+	0.335009	0.635648	7.29784	0	0.0513726	0.938647	0.0183103	0.140997	WP_TYPE_II_INTERFERON_SIGNALING
0.37701	-0.0386659	-0.163236	Hallmark		+			+	0.302209	0.660683	4.71839	0.000285714	0.618938	0.593488	-0.0700942	-1.18794	HALLMARK_COMPLEMENT
-0.272285	-0.2385	0.0956922	WikiPathway		+			+	0.297235	0.66012	3.00753	0.0103704	0.526371	0.627429	0.118298	1.05257	WP_EFFECT_OF_PROGERIN_ON_GENES_INVOLVED_IN_HUTCHINSONGILFORD_PROGERIA_SYNDROME
-0.313204	0.194803	-0.0997626	WikiPathway		+			+	0.288798	0.668048	2.6001	0.0241212	0.547921	0.614534	0.154313	1.08485	WP_COMPLEMENT_SYSTEM
-0.0510235	-0.324742	-0.069799	WikiPathway		+			+	0.285406	0.668786	3.47867	0.00436364	0.456218	0.653889	-0.0543169	-0.943881	WP_B_CELL_RECEPTOR_SIGNALING_PATHWAY
0.0490722	0.0990634	-0.217437	WikiPathway		+			+	0.265288	0.683023	4.05201	0.002	0.0612406	0.931366	0.0190425	0.166443	WP_PREIMPLANTATION_EMBRYO
-0.381327	-0.171068	-0.0956247	WikiPathway		+			+	0.248396	0.688045	3.45644	0.00434783	0.323262	0.734758	0.0676761	0.71972	WP_DNA_MISMATCH_REPAIR
-0.387833	-0.160325	0.0702367	WikiPathway		+			+	0.240442	0.692425	3.34992	0.00566667	0.318891	0.735358	0.0662392	0.711871	WP_COMPLEMENT_SYSTEM_IN_NEURONAL_DEVELOPMENT_AND_PLASTICITY
-0.136001	-0.0821196	0.218007	Hallmark		+			+	0.227448	0.704928	9.03457	0	0.0318828	0.964854	0.00908555	0.0892787	HALLMARK_INTERFERON_GAMMA_RESPONSE
-0.267641	0.131366	0.119245	WikiPathway		+			+	0.226305	0.703077	2.54436	0.0260571	0.575944	0.612254	0.0988364	1.12611	WP_BURN_WOUND_HEALING
-0.180093	0.106718	0.141727	WikiPathway		+			+	0.223739	0.703585	4.04257	0.00189474	0.47776	0.648371	0.0640109	0.977876	WP_EBOLA_VIRUS_INFECTION_IN_HOST
-0.245398	0.104749	-0.103968	WikiPathway		+			+	0.16038	0.774911	2.10727	0.0459231	0.370119	0.690861	0.142917	0.801801	WP_COMPLEMENT_AND_COAGULATION_CASCADES
0.0186465	0.231725	0.0595299	WikiPathway		+			+	0.154274	0.780792	8.58305	0	0.226356	0.809387	-0.0558759	-0.536772	WP_ALLOGRAFT_REJECTION
-0.225031	0.163096	0.0341364	WikiPathway		+			+	0.153218	0.77857	2.13492	0.0475833	0.193429	0.833169	0.0603844	0.469748	WP_UREA_CYCLE_AND_METABOLISM_OF_AMINO_GROUPS
0.151815	-0.00891451	0.300621	Hallmark		+			+	0.0849935	0.879116	11.6438	0	0.296181	0.749576	-0.0658207	-0.670517	HALLMARK_ALLOGRAFT_REJECTION
-0.0210998	0.0809495	0.0675121	WikiPathway		+			+	0.0583779	0.918436	3.84254	0.00228571	0.159073	0.843615	0.0672155	0.396655	WP_COMPLEMENT_ACTIVATION
0.131161	0.308419	0.230113	WikiPathway		+			+	0.032018	0.954447	6.45709	0	0.173775	0.839016	-0.0220291	-0.428356	WP_NETWORK_MAP_OF_SARSCOV2_SIGNALING_PATHWAY
-0.210167	-0.0340787	-0.392543	WikiPathway		+			+	0.0244454	0.956344	3.12357	0.008	0.136763	0.846825	-0.0494265	-0.347257	WP_STRIATED_MUSCLE_CONTRACTION_PATHWAY
