# Supplementary material for: Spatial proteomics of ovarian cancer precursors delineates early disease changes and drug targets
Source: Mol Syst Biol. 2025 Nov 13;22(1):7–41. doi: 10.1038/s44320-025-00168-4 (PMC12759074; doi:10.1038/s44320-025-00168-4)
Supplement: Supplementary file 26 — Dataset EV20 [file 44320_2025_168_MOESM26_ESM.xlsx]

## Sheet: Legend
Dataset EV20. Table ranking ovarian cancer cell lines according to similarity to high-grade serous ovarian cancer (HGSOC) based on integrated mutational, transcriptomic and copy number alteration profiles.

## Sheet: Dataset EV20
Name	% Rank by Mutation	% Rank by Copy Number	% Rank by Expression	% Rank by Avg % Ranks	cBioPortal_Link
KURAMOCHI	0.768	0.998	0.999	1	https://www.cbioportal.org/patient?studyId=ccle_broad_2019&caseId=KURAMOCHI_OVARY
OAW-28	0.973	0.911	0.997	1	https://www.cbioportal.org/patient?studyId=ccle_broad_2019&caseId=OAW28_OVARY
OVCAR-4	0.973	0.756	0.993	0.99	https://www.cbioportal.org/patient?studyId=ccle_broad_2019&caseId=OVCAR4_OVARY
PEO1	0.801	0.854	0.986	0.99	NA
FU-OV-1	0.973	0.854	0.748	0.98	https://www.cbioportal.org/patient?studyId=ccle_broad_2019&caseId=FUOV1_OVARY
JHOS-4	0.973	0.598	0.989	0.98	https://www.cbioportal.org/patient?studyId=ccle_broad_2019&caseId=JHOS4_OVARY
OVKATE	0.627	0.618	0.997	0.91	https://www.cbioportal.org/patient?studyId=ccle_broad_2019&caseId=OVKATE_OVARY
OVCAR-3	0.852	0.342	0.994	0.88	NA
OVMIU	0.341	0.854	0.96	0.87	NA
OV-17R	0.801	0.342	0.997	0.85	NA
OVISE	0.288	0.928	0.918	0.85	https://www.cbioportal.org/patient?studyId=ccle_broad_2019&caseId=OVISE_OVARY
JHOS-3	0.051	0.993	0.991	0.81	NA
OAW-42	0.28	0.89	0.839	0.79	https://www.cbioportal.org/patient?studyId=ccle_broad_2019&caseId=OAW42_OVARY
ES-2	0.653	0.911	0.403	0.78	https://www.cbioportal.org/patient?studyId=ccle_broad_2019&caseId=ES2_OVARY
JHOS-2	0.051	0.911	0.99	0.76	https://www.cbioportal.org/patient?studyId=ccle_broad_2019&caseId=JHOS2_OVARY
Hey	0.352	0.993	0.564	0.74	NA
EFO-21	0.179	0.802	0.918	0.73	https://www.cbioportal.org/patient?studyId=ccle_broad_2019&caseId=EFO21_OVARY
OVCAR-8	0.259	0.718	0.839	0.7	https://www.cbioportal.org/patient?studyId=ccle_broad_2019&caseId=OVCAR8_OVARY
OV-7	0.49	0.89	0.322	0.63	https://www.cbioportal.org/patient?studyId=ccle_broad_2019&caseId=OV7_OVARY
OV-56	0.45	0.972	0.247	0.61	https://www.cbioportal.org/patient?studyId=ccle_broad_2019&caseId=OV56_OVARY
TOV-112D	0.694	0.234	0.748	0.61	https://www.cbioportal.org/patient?studyId=ccle_broad_2019&caseId=TOV112D_OVARY
A2780	0.28	0.528	0.748	0.54	https://www.cbioportal.org/patient?studyId=ccle_broad_2019&caseId=A2780_OVARY
OVCA420	0.668	0.802	0.016	0.5	NA
DOV13	0.419	0.087	0.941	0.46	NA
IGROV-1	0.39	0.298	0.748	0.46	https://www.cbioportal.org/patient?studyId=ccle_broad_2019&caseId=IGROV1_OVARY
OC-314	0.394	0.138	0.918	0.46	https://www.cbioportal.org/patient?studyId=ccle_broad_2019&caseId=OC314_OVARY
OV-90	0.681	0.672	0.095	0.46	https://www.cbioportal.org/patient?studyId=ccle_broad_2019&caseId=OV90_OVARY
OVCAR-5	0.352	0.944	0.137	0.46	NA
EFO-27	0.419	0.082	0.895	0.44	https://www.cbioportal.org/patient?studyId=ccle_broad_2019&caseId=EFO27_OVARY
PA-1	0.322	0.138	0.941	0.44	NA
Caov-4	0.051	0.33	1	0.42	https://www.cbioportal.org/patient?studyId=ccle_broad_2019&caseId=CAOV4_OVARY
SK-OV-3	0.54	0.115	0.696	0.41	https://www.cbioportal.org/patient?studyId=ccle_broad_2019&caseId=SKOV3_OVARY
RMG-I	0.051	0.359	0.748	0.29	https://www.cbioportal.org/patient?studyId=ccle_broad_2019&caseId=RMGI_OVARY
OVTOKO	0.259	0.103	0.564	0.18	https://www.cbioportal.org/patient?studyId=ccle_broad_2019&caseId=OVTOKO_OVARY
TYK-nu	0.428	0.188	0.247	0.15	https://www.cbioportal.org/patient?studyId=ccle_broad_2019&caseId=TYKNU_OVARY
TOV-21G	0.341	0.096	0.403	0.13	https://www.cbioportal.org/patient?studyId=ccle_broad_2019&caseId=TOV21G_OVARY
OVK-18	0.397	0.087	0.322	0.12	https://www.cbioportal.org/patient?studyId=ccle_broad_2019&caseId=OVK18_OVARY
