# Supplementary material for: Spatial proteomics of ovarian cancer precursors delineates early disease changes and drug targets
Source: Mol Syst Biol. 2025 Nov 13;22(1):7–41. doi: 10.1038/s44320-025-00168-4 (PMC12759074; doi:10.1038/s44320-025-00168-4)
Supplement: Supplementary file 27 — Dataset EV21 [file 44320_2025_168_MOESM27_ESM.xlsx]

## Sheet: Legend
Dadaset EV 21. Table with detailed genomic and proteomic characterization of OVCAR-8, EFO-21, OAW-42 and ES-2 cell lines including subtype annotation, mutation status, copy number alterations, DHCR7 protein levels and protein abundance levels of the cholesterol biosynthesis pathway. The data was retrieved from Cell Modell Passports (https://cellmodelpassports.sanger.ac.uk/, Welcome Sanger Institu…

## Sheet: Dataset EV21
Characteristic	OVCAR-8	EFO-21	OAW-42	ES-2	Reference
Subtype	High Grade Ovarian Serous Adenocarcinoma	Ovarian Clear Cell Adenocarcinoma	Ovarian Serous Cystadenocarcinoma	Ovarian Clear Cell Adenocarcinoma	https://cellmodelpassports.sanger.ac.uk/
TP53 mutation status	Yes (splice site mutation)	Yes (missense)	No	Yes (missense)	https://cellmodelpassports.sanger.ac.uk/
BRCA status	WT	BRCA2 mut	BRCA1 mut	BRCA2 mut	https://cellmodelpassports.sanger.ac.uk/
MSI status (MSS - stable, MSI - instable)	MSS	MSS	MSS	MSS	https://cellmodelpassports.sanger.ac.uk/
Copy number alterations	MYC, FAM135B, CCNE1 amplification, MECOM loss	MAP3K13, MB21D2, EIF4A2 amplification, NF1, RSPH10B2 loss	NFATC2, PTK6, SALL4 amplification	NSD2, BIRC3, FGRF3 amplification	https://cellmodelpassports.sanger.ac.uk/
Mutations	ERBB2 GOF mutation, EP300, B2M, AMER1 LOF mutation	LRP1B LOF mutation	ARID1A LOF mutation, PIK3CA GOD mutation	BRAF, CDK4, MAP21K (GOF mutations), TCIRG1 LOF mutation	https://cellmodelpassports.sanger.ac.uk/
DHCR7 protein abundance (log2)	4.10324	4.96952	3.66917	5.11615	Gonçalves et al. (PMID: 35839778)
Choletserol pathway abundance (median)	-0.325825	0.360172	0.674261	-0.412389	Gonçalves et al. (PMID: 35839778)
